# Supplementary material for: Phenotypic profile linked to inhibition of the major Zn influx system in Salmonella enterica : proteomics and ionomics investigations
Source: Royal Society of Chemistry journal article supplement (doi:10.1039/c0mb00140f), 2010-10-20
Supplement: c0mb00140f.zip [file c0mb00140f.zip]

MA6926 LC-MS run 1: 6926\_220709\_1a2\_01

| Protein name                                    | Peptide Rank | Modification | Sequence                      | Peptide sequence start | Peptide sequence Length | Peptide Matched Products | Score  | By Matches                                                                                                                                               | Precursor MH+ (Da) | Retention time (min) | Intensity | z | Precursor m/z | MH+ Error (ppm) |
|-------------------------------------------------|--------------|--------------|-------------------------------|------------------------|-------------------------|--------------------------|--------|----------------------------------------------------------------------------------------------------------------------------------------------------------|--------------------|----------------------|-----------|---|---------------|-----------------|
| [P0A1R6]DBHA_SALTY DNA-binding protein HU-alpha | 1            |              | IAAANVPAFVSGK                 | 70                     | 13                      | 23                       | 185.41 | b2b3b4b5*b5b6*b6y2y3°y3y4y5y6y7°y7y8y9y10*y10y11*y11y12y13                                                                                               | 1244.69            | 59.326               | 667470    | 2 | 622.85        | -4.51           |
| [P0A1R6]DBHA_SALTY DNA-binding protein HU-alpha | 2            |              | AALESTLAAITESLKEGDAVQLVGFGTFK | 22                     | 29                      | 53                       | 419.92 | b2b3b4°b4b7b8°b8b9°b9b10b14b18b20b22b23°b23b24b25b26b27b28°b28b29y1y2y3y4°y4y5°y5y6°y6y7y8y10y11y12*y12y13°y13y14*y14y15°y15*y15y17y18y21y22y23y25y26y29 | 2966.56            | 114.060              | 574938    | 3 | 989.53        | -3.87           |
| [P0A1R6]DBHA_SALTY DNA-binding protein HU-alpha | 3            |              | AALESTLAAITESLK               | 22                     | 15                      | 11                       | 104.06 | b3b4b6b8b9b14y5y7y8y12y15                                                                                                                                | 1517.84            | 96.507               | 57978     | 2 | 759.42        | -2.25           |
| [P0A1R6]DBHA_SALTY DNA-binding protein HU-alpha | 4            |              | NPQTGK                        | 61                     | 6                       | 3                        | 27.43  | b4b5°b5                                                                                                                                                  | 644.33             | 36.859               | 32279     | 1 | 644.33        | -4.83           |
| [P0A1R6]DBHA_SALTY DNA-binding protein HU-alpha | 5            |              | EGDAVQLVGFGTFK                | 37                     | 14                      | 6                        | 31.73  | b8°b8y6y7y9*y9                                                                                                                                           | 1467.75            | 77.982               | 21975     | 2 | 734.38        | -0.17           |
| [P0A1R6]DBHA_SALTY DNA-binding protein HU-alpha | 6            |              | TQLIDVIADK                    | 3                      | 10                      | 5                        | 40.43  | b4b6y3°y3y7                                                                                                                                              | 1115.64            | 45.196               | 5235      | 2 | 558.32        | 4.60            |
| [P0A1H5]EFTU_SALTY Elongation factor Tu         | 1            |              | AIDKPFLLPIDVFSISGR            | 205                    | 19                      | 34                       | 281.3  | b2b4°b4b5b6b7b8b9b10b11b12b14b15y1y2y3y4y5°y5y6°y6y7°y7y8°y8y9°y9y10°y10y11°y11y12y15y19                                                                 | 2117.15            | 103.646              | 869155    | 3 | 706.39        | -8.76           |
| [P0A1H5]EFTU_SALTY Elongation factor Tu         | 2            |              | ELLSQYDFPGDDTPIVR             | 155                    | 17                      | 27                       | 182.17 | b2°b2b3°b3b4°b4b5°b5b6b13°b13y1y2y3y4y5y6y8y9y10°y10y11y12°y12y13y17                                                                                     | 1964.97            | 76.539               | 452205    | 2 | 982.99        | 5.59            |
| [P0A1H5]EFTU_SALTY Elongation factor Tu         | 3            |              | AGENVGVLLR                    | 270                    | 10                      | 18                       | 132.39 | b4°b4b5°b5b6°b6y1y2y3y4y5y6y7*y7y8*y8y9y10                                                                                                               | 1027.58            | 55.940               | 427810    | 2 | 514.29        | -14.02          |
| [P0A1H5]EFTU_SALTY Elongation factor Tu         | 4            |              | IIELAGFLDSYIPEPER             | 188                    | 17                      | 33                       | 307.87 | b2b3b4b5b6b7b8b9b11°b11b12°b12b14y1y2y3°y3y4°y4y5°y5y6y7y8°y8y9y10y11y12y13y14y15y17                                                                     | 1962.03            | 101.463              | 424624    | 2 | 981.52        | 5.35            |
| [P0A1H5]EFTU_SALTY Elongation factor Tu         | 5            |              | GITINTSHVEYDTPTR              | 59                     | 16                      | 30                       | 213.9  | b2b3°b3b9b10b12b13b16y3°y3y4°y4y5°y5y6y7y8y9y10°y10y11y12°y12*y12y13*y13y14°y14*y14y16                                                                   | 1803.86            | 49.178               | 421030    | 3 | 601.96        | -14.01          |
| [P0A1H5]EFTU_SALTY Elongation factor Tu         | 6            |              | TTLTAAITTVLAK                 | 25                     | 13                      | 20                       | 150.57 | b2°b2b3°b3b4°b4b6°b6b13y2y3y4y5y6y7y8y9y10y11y13                                                                                                         | 1303.78            | 84.118               | 395171    | 2 | 652.39        | -4.49           |
| [P0A1H5]EFTU_SALTY Elongation factor Tu         | 7            |              | QVGVPYIIVFLNK                 | 124                    | 13                      | 15                       | 120.51 | b3°b3b4b6b13y1y4*y4y5y6y7y8y9y11y13                                                                                                                      | 1489.88            | 98.622               | 391011    | 2 | 745.44        | 0.25            |
| [P0A1H5]EFTU_SALTY Elongation factor Tu         | 8            |              | TTDVTGTIELPEGVEMVMPGDNIK      | 334                    | 24                      | 45                       | 291.79 | b1b2°b2b3°b3b4b5°b5b7°b7b8°b8b9°b9b10°b10b12b14b17°b17b18y1y2y3y4y5*y5y6°y6*y6y7°y7*y7y8y9y10°y10*y10y11y12y14y15y16y17y24                               | 2546.26            | 86.590               | 278345    | 2 | 1273.63       | 7.96            |

|                                           |    |                       |                                      |     |    |    |        |                                                                                          |         |         |        |   |         |        |
|-------------------------------------------|----|-----------------------|--------------------------------------|-----|----|----|--------|------------------------------------------------------------------------------------------|---------|---------|--------|---|---------|--------|
| P0A1H5 EFTU_SALTY Elongation factor Tu    | 9  |                       | ALEGDAEWEAK                          | 177 | 11 | 10 | 83.43  | b2y2y3y4y5y6y8y9°y9y11                                                                   | 1218.55 | 45.795  | 162124 | 2 | 609.78  | -7.21  |
| P0A1H5 EFTU_SALTY Elongation factor Tu    | 10 |                       | VGEEVEIVGIK                          | 238 | 11 | 14 | 117.02 | b3b4°b4y1y2y3y4y5y7y8y9°y9y10y11                                                         | 1171.65 | 59.910  | 147395 | 2 | 586.33  | -6.98  |
| P0A1H5 EFTU_SALTY Elongation factor Tu    | 11 | Carbamidomethyl+C(3)  | STCTGVEMFR                           | 253 | 10 | 16 | 89.59  | b2°b2b6y1y2y3y4°y4y5y6°y6y7°y7y8°y8y10                                                   | 1187.51 | 52.377  | 132055 | 2 | 594.26  | -3.60  |
| P0A1H5 EFTU_SALTY Elongation factor Tu    | 12 | Carbamidomethyl+C(1)  | CDMVDDEELLELVEMEV                    | 137 | 18 | 21 | 168.57 | b2b3b5b8b9b11b12y1y2y3y4y5°y5y6y7y8°y8y9y13y14y18                                        | 2224.00 | 105.670 | 127888 | 2 | 1112.50 | 9.22   |
| P0A1H5 EFTU_SALTY Elongation factor Tu    | 13 |                       | NMITGAAQMDGAILVVAATDGPMPQTR          | 90  | 27 | 4  | 23.08  | y6y7y10*y10                                                                              | 2729.34 | 126.218 | 3331   | 3 | 910.45  | -2.06  |
| P0A1H5 EFTU_SALTY Elongation factor Tu    | 14 |                       | MVVTLIHPIAMDDGLR                     | 358 | 16 | 26 | 246.4  | b3b4°b4b5°b5b6b7°b7b11b13y3y4°y4y5°y5y6y7y8y9°y9y10°y10y11y12y13y15                      | 1780.91 | 78.437  | 789172 | 3 | 594.31  | -17.07 |
| P0A1H5 EFTU_SALTY Elongation factor Tu    | 15 |                       | EHILLGR                              | 117 | 7  | 6  | 68.39  | b3°b3b4y3y4y5                                                                            | 837.48  | 38.988  | 111061 | 2 | 419.24  | -20.33 |
| P0A1H5 EFTU_SALTY Elongation factor Tu    | 16 |                       | GQVLAKPGTIKPHTK                      | 289 | 15 | 13 | 91.2   | b4°b4y3°y3y4°y4y5°y5y6y8y9°y9y10                                                         | 1574.91 | 27.870  | 84383  | 3 | 525.64  | -15.89 |
| P0A1H5 EFTU_SALTY Elongation factor Tu    | 17 |                       | LLDEGR                               | 264 | 6  | 4  | 40.96  | b4°b4y4y5                                                                                | 702.37  | 26.700  | 3927   | 1 | 702.37  | -12.86 |
| P0A1H5 EFTU_SALTY Elongation factor Tu    | 18 | Carbamidomethyl+C(7)  | HYAHVDCPGHADYVK                      | 75  | 15 | 3  | 18.79  | b6b9y9                                                                                   | 1768.78 | 79.607  | 3414   | 3 | 590.26  | -5.94  |
| P0A1H5 EFTU_SALTY Elongation factor Tu    | 19 |                       | HTPFFK                               | 319 | 6  | 4  | 27.43  | b4°b4b5°b5                                                                               | 776.40  | 52.339  | 1629   | 2 | 388.70  | -10.69 |
| P0A1H5 EFTU_SALTY Elongation factor Tu    | 20 | Carbamidomethyl+C(14) | QVGVPYIIVFLNKCDMVDDEELLELVEMEV       | 124 | 31 | 4  | 50.3   | y4y5y6y7                                                                                 | 3694.86 | 127.457 | 31937  | 3 | 1232.29 | 4.49   |
| P0A1H5 EFTU_SALTY Elongation factor Tu    | 21 |                       | GTVVTGRVER                           | 224 | 10 | 5  | 59.52  | b9y3y6y7y8                                                                               | 1073.60 | 25.225  | 20110  | 2 | 537.30  | -7.96  |
| P0A1H5 EFTU_SALTY Elongation factor Tu    | 22 |                       | IIELAGFLDSYIPEPERAIDKPFLLPIEDVFSISGR | 188 | 36 | 9  | 60.01  | b3b5y3y4y6y7y11y12y24                                                                    | 4060.17 | 122.499 | 16583  | 4 | 1015.80 | 0.84   |
| P0A1H5 EFTU_SALTY Elongation factor Tu    | 23 |                       | FESEVYILSKDEGGR                      | 304 | 15 | 4  | 37.67  | b7b8b11b13                                                                               | 1728.84 | 85.719  | 7034   | 2 | 864.93  | -0.64  |
| P0A1H5 EFTU_SALTY Elongation factor Tu    | 24 |                       | TYGGAARAFDQIDNAPEEK                  | 38  | 19 | 10 | 81.81  | b7b9b10b11b12°b12b15y4y5y7                                                               | 2052.95 | 95.684  | 3097   | 2 | 1026.98 | -5.47  |
| P0A1H5 EFTU_SALTY Elongation factor Tu    | 25 |                       | GYRPQFYFRTTDTGTIELPEGVE MVMPGDNIK    | 325 | 33 | 3  | 23.02  | b8b9b11                                                                                  | 3760.80 | 99.412  | 2541   | 3 | 1254.27 | -8.57  |
| P0A1H5 EFTU_SALTY Elongation factor Tu    | 26 | Phosphoryl STY(4)     | MVVTLIHPIAMDDGLR                     | 358 | 16 | 4  | 31.73  | b5_H3PO4 b5b6y6y11                                                                       | 1860.91 | 105.960 | 62103  | 3 | 620.97  | 3.08   |
| P0A1H5 EFTU_SALTY Elongation factor Tu    | 27 |                       | TINTSHVEYDTPTR                       | 61  | 14 | 8  | 43.79  | b3°b3b4°b4b9b10°b10°b10                                                                  | 1633.79 | 49.174  | 22362  | 2 | 817.40  | 5.01   |
| P0A1H5 EFTU_SALTY Elongation factor Tu    | 28 |                       | INTSHVEYDTPTR                        | 62  | 13 | 3  | 14.67  | b3°b3b9                                                                                  | 1532.73 | 49.203  | 3084   | 2 | 766.87  | -1.12  |
| P0A1H5 EFTU_SALTY Elongation factor Tu    | 29 |                       | GITINTSHVEYDTPTR                     | 59  | 16 | 0  | 4.15   |                                                                                          | 1785.85 | 49.175  | 21585  | 3 | 595.96  | -11.69 |
| P66593 RS6_SALTY 30S ribosomal protein S6 | 1  |                       | AHYVLMNVEAPQEVIDELETFR               | 56  | 23 | 34 | 302.78 | b2b3b4b5b6b7b8b9b10°b10b13b14b18b19y1y2y3y4y5°y5y6y7°y7y8°y8y9y10y11y12*y12y13*y13y14y23 | 2704.33 | 109.565 | 192789 | 3 | 902.11  | 0.00   |
| P66593 RS6_SALTY 30S ribosomal protein S6 | 2  |                       | YSAAITGAEGK                          | 24  | 11 | 24 | 164.59 | b1b2°b2b3°b3b4b7b8°b8b10y1y2y3°y3y4y5y6°y6y7°y7y9°y9y10y11                               | 1067.53 | 33.074  | 93621  | 2 | 534.27  | -7.78  |
| P66593 RS6_SALTY 30S ribosomal protein S6 | 3  |                       | HAVTEASPMVK                          | 93  | 11 | 23 | 191.64 | b1b2b3b4°b4b5°b5b6°b6b7°b7b9°b9b10y4y5y6y7°y7y8y9y10y11                                  | 1169.59 | 29.854  | 59544  | 2 | 585.30  | -8.56  |

|                                                           |    |                      |                                   |     |    |    |        |                                                                                  |         |         |        |   |         |        |
|-----------------------------------------------------------|----|----------------------|-----------------------------------|-----|----|----|--------|----------------------------------------------------------------------------------|---------|---------|--------|---|---------|--------|
| P66593 RS6_SALTY 30S ribosomal protein S6                 | 4  |                      | HYEIVFMVHPDQSEQVPGMIER            | 2   | 22 | 18 | 122.35 | b3°b3b4b5b6b7b13°b13b16y4y5y6°y6y8y11°y11*y11y13                                 | 2641.21 | 73.782  | 124483 | 4 | 661.06  | -17.38 |
| P66593 RS6_SALTY 30S ribosomal protein S6                 | 5  |                      | FNDAVIR                           | 79  | 7  | 7  | 84.93  | b3b5y3y4y5y6*y6                                                                  | 834.43  | 41.507  | 92456  | 2 | 417.72  | -15.51 |
| P66593 RS6_SALTY 30S ribosomal protein S6                 | 6  |                      | LEDWGR                            | 38  | 6  | 4  | 54.49  | b3y3y4y5                                                                         | 775.37  | 37.843  | 5869   | 2 | 388.19  | -4.80  |
| P66593 RS6_SALTY 30S ribosomal protein S6                 | 7  |                      | RQLAYPINK                         | 44  | 9  | 6  | 46.59  | b3*b3b4b7y4*y4                                                                   | 1102.63 | 36.463  | 35278  | 2 | 551.82  | -6.53  |
| P66593 RS6_SALTY 30S ribosomal protein S6                 | 8  |                      | AHYVLMNVEAPQEVIDELETTRFNDAVIR     | 56  | 30 | 6  | 25.62  | b3b7y4y20*y20y21                                                                 | 3519.73 | 114.629 | 17833  | 4 | 880.69  | -6.59  |
| P66593 RS6_SALTY 30S ribosomal protein S6                 | 9  |                      | HYEIVFMVHPDQSEQVPGMIERYSAAITGAEGK | 2   | 33 | 6  | 18.6   | b4b6b8y4°y4y10                                                                   | 3689.79 | 119.514 | 2534   | 5 | 738.76  | 4.96   |
| P66593 RS6_SALTY 30S ribosomal protein S6                 | 10 |                      | HAVTEASPMVK                       | 93  | 11 | 0  | 2.26   |                                                                                  | 1151.57 | 29.848  | 1677   | 3 | 384.53  | -11.98 |
| P0A2H9 DSBA_SALTY Thioldisulfide interchange protein dsbA | 1  |                      | AAADLQLQGV PAMFVNGK               | 158 | 18 | 28 | 247.84 | b2b4b5b6b7b8b9b10b13b14b16y2y3*y3y4y5*y5y7*y7y8y10y11*y11y12*y12y13y14y18        | 1829.96 | 80.673  | 187876 | 2 | 915.48  | -1.33  |
| P0A2H9 DSBA_SALTY Thioldisulfide interchange protein dsbA | 2  |                      | YQINPQGM DTSSMDVFVQQYADTVK        | 176 | 25 | 17 | 98.26  | b2*b2b3b4*b4b14b15y2y3y4y5y6y7°y7*y7y10y25                                       | 2865.31 | 86.343  | 108294 | 3 | 955.78  | 1.96   |
| P0A2H9 DSBA_SALTY Thioldisulfide interchange protein dsbA | 3  |                      | YHVEFLGPLGK                       | 77  | 11 | 8  | 52.12  | b2b3b4y2y3y5y6y11                                                                | 1259.67 | 68.622  | 104697 | 2 | 630.34  | -7.17  |
| P0A2H9 DSBA_SALTY Thioldisulfide interchange protein dsbA | 4  |                      | TQTVQSAADIR                       | 116 | 11 | 22 | 126.74 | b1°b1b2°b2*b2b3°b3*b3b6b7y2y3y4y5y6y7°y7*y7y8y9*y9y11                            | 1189.61 | 34.916  | 66514  | 2 | 595.31  | -5.34  |
| P0A2H9 DSBA_SALTY Thioldisulfide interchange protein dsbA | 5  |                      | ELTQAWAVAMALGVEDK                 | 88  | 17 | 3  | 16.91  | b11y4y7                                                                          | 1831.90 | 71.065  | 1640   | 2 | 916.45  | -15.53 |
| P0A2H9 DSBA_SALTY Thioldisulfide interchange protein dsbA | 6  |                      | ELTQAWAVAMALGVEDKVTVPLFEAVQK      | 88  | 28 | 8  | 21.44  | b5°b5*b5b7*b7y6y8y23                                                             | 3043.62 | 115.679 | 33790  | 3 | 1015.21 | 0.00   |
| P0A2H9 DSBA_SALTY Thioldisulfide interchange protein dsbA | 7  |                      | VFVDAGVKGEDYDAAWNSFVVK            | 128 | 22 | 3  | 23.77  | b3b4b13                                                                          | 2416.16 | 81.052  | 5223   | 2 | 1208.58 | -8.29  |
| P0A2H9 DSBA_SALTY Thioldisulfide interchange protein dsbA | 8  | Oxidation+M(21)      | YHVEFLGPLGKELTQAWAVAMALGVEDK      | 77  | 28 | 4  | 25.73  | b8b11y12y13                                                                      | 3088.62 | 85.402  | 11490  | 4 | 772.91  | 13.91  |
| P0A2H9 DSBA_SALTY Thioldisulfide interchange protein dsbA | 9  |                      | PAMFVNGK                          | 168 | 8  | 1  | 7.29   | b5                                                                               | 863.43  | 80.654  | 4596   | 1 | 863.43  | -12.65 |
| P0A2H9 DSBA_SALTY Thioldisulfide interchange protein dsbA | 10 |                      | YQINPQGM DTSSMDVFVQQYA            | 176 | 21 | 0  | 7.54   |                                                                                  | 2422.06 | 86.317  | 1531   | 4 | 606.27  | -1.92  |
| P25077 MDH_SALTY Malate dehydrogenase                     | 1  |                      | NQLPSGSELSLYDIAPVTPGVAVDLSHIPTAVK | 21  | 33 | 26 | 95.35  | b1b2*b2b3*b3b8°b8b9*b9b10°b10*b10b13b15°b15y1y2y3y5y12y15y16y18y19y30y33         | 3388.82 | 93.673  | 234180 | 3 | 1130.28 | 6.27   |
| P25077 MDH_SALTY Malate dehydrogenase                     | 2  | Carbamidomethyl+C(2) | ACVGITNPVNTTVAIAAEVLKK            | 111 | 23 | 16 | 123.4  | b2b3b4b5b6b12y2y3y4y6y15y16y18y20y21y23                                          | 2382.33 | 104.331 | 181513 | 3 | 794.78  | -4.92  |
| P25077 MDH_SALTY Malate dehydrogenase                     | 3  |                      | VAVLGAAGGIGQALALLK                | 2   | 19 | 32 | 367.51 | b2b3b4b5b6b7b8b9b10b11b15b16b17b18b19y1y2y3y4y5y6y7y9y10y11y12y13y14y15y16y17y19 | 1735.09 | 119.476 | 181277 | 2 | 868.05  | 2.74   |

|                                       |    |                      |                                     |     |    |    |        |                                                                                |         |         |        |   |         |        |
|---------------------------------------|----|----------------------|-------------------------------------|-----|----|----|--------|--------------------------------------------------------------------------------|---------|---------|--------|---|---------|--------|
| P25077 MDH_SALTY Malate dehydrogenase | 4  |                      | FFSQPLLLGK                          | 262 | 10 | 8  | 69.52  | b2y2y3y4y6y7y8y10                                                              | 1149.66 | 75.411  | 150507 | 2 | 575.33  | -7.96  |
| P25077 MDH_SALTY Malate dehydrogenase | 5  |                      | DIQLGEDFINK                         | 301 | 11 | 14 | 89.17  | b2°b2b3y3y4y6°y6y7y8y9°y9°y9y11*y11                                            | 1291.64 | 67.550  | 134656 | 2 | 646.33  | -6.62  |
| P25077 MDH_SALTY Malate dehydrogenase | 6  |                      | SIGTLSAFEQHSLDAMLDTLKK              | 279 | 22 | 14 | 70.72  | b2°b2b10b13y2y3y11y12y15y17y18y20y22*y22                                       | 2405.22 | 94.144  | 123149 | 3 | 802.41  | -7.71  |
| P25077 MDH_SALTY Malate dehydrogenase | 7  |                      | IQNAGTEVVEAK                        | 205 | 12 | 24 | 143.66 | b2*b2b3*b3b4y1y2y3°y3y4y5y6y7y8°y8y9y10°y10*y10y11°y11*y11y12*y12              | 1258.66 | 34.341  | 107890 | 2 | 629.83  | -6.59  |
| P25077 MDH_SALTY Malate dehydrogenase | 8  |                      | LFGVTTLDIIR                         | 142 | 11 | 9  | 56.89  | b2b3b4y1y2y3y6y9y11                                                            | 1247.73 | 88.567  | 67940  | 2 | 624.37  | -5.58  |
| P25077 MDH_SALTY Malate dehydrogenase | 9  |                      | AGGGSATLSMGQAAAR                    | 217 | 16 | 17 | 98.87  | b5b8°b8b15b16y2y6y7y8y9°y9°y9y10°y10y11°y11y16                                 | 1405.68 | 39.749  | 62853  | 2 | 703.34  | -4.60  |
| P25077 MDH_SALTY Malate dehydrogenase | 10 |                      | SDLFNVNAGIVK                        | 87  | 12 | 12 | 77.79  | b2b3°b3b5°b5y2y4y6y7y8y9y12                                                    | 1276.68 | 69.254  | 61861  | 2 | 638.84  | -6.79  |
| P25077 MDH_SALTY Malate dehydrogenase | 11 | Carbamidomethyl+C(2) | ACVGITNPVNTTVAIAAEVLK               | 111 | 22 | 6  | 22.65  | b2b4b5y1y2y8                                                                   | 2254.23 | 112.999 | 9699   | 3 | 752.08  | -8.77  |
| P25077 MDH_SALTY Malate dehydrogenase | 12 |                      | GFSGEDATPALEGADVVLISAGVAR<br>KPGMDR | 56  | 31 | 3  | 22.26  | b3b4y7                                                                         | 3086.56 | 82.571  | 3013   | 3 | 1029.52 | -0.55  |
| P25077 MDH_SALTY Malate dehydrogenase | 13 |                      | NLVQQIAK                            | 99  | 8  | 3  | 36.94  | b3y3y6                                                                         | 913.53  | 48.489  | 69036  | 2 | 457.27  | -15.83 |
| P25077 MDH_SALTY Malate dehydrogenase | 14 |                      | GFSGEDATPALEGADVVLISAGVAR           | 56  | 25 | 3  | 19.01  | b4b15b22                                                                       | 2402.27 | 106.109 | 6757   | 3 | 801.43  | 19.11  |
| P25077 MDH_SALTY Malate dehydrogenase | 15 |                      | SIGTLSAFEQHSLDAMLDTLK               | 279 | 21 | 3  | 14.36  | b8b13y12                                                                       | 2277.18 | 82.283  | 3133   | 3 | 759.73  | 18.33  |
| P25077 MDH_SALTY Malate dehydrogenase | 16 |                      | NGVEER                              | 272 | 6  | 1  | 13.9   | y4                                                                             | 703.34  | 31.842  | 1689   | 2 | 352.17  | -1.74  |
| P25077 MDH_SALTY Malate dehydrogenase | 17 |                      | IKGFSGEDATPALEGADVVLISAGVAR         | 54  | 27 | 6  | 63.49  | b14y4y5y6y7y8                                                                  | 2643.39 | 86.816  | 51442  | 3 | 881.80  | -3.23  |
| P25077 MDH_SALTY Malate dehydrogenase | 18 |                      | RIQNAGTEVVEAK                       | 204 | 13 | 5  | 30.68  | b3b11y3°y3y8                                                                   | 1414.77 | 31.732  | 13255  | 2 | 707.89  | 0.17   |
| P25077 MDH_SALTY Malate dehydrogenase | 19 |                      | AGGGSATLSMGQAAARFGLSLVR             | 217 | 23 | 4  | 29.55  | b7b8b10b14                                                                     | 2178.12 | 77.343  | 2816   | 2 | 1089.56 | -12.44 |
| P25077 MDH_SALTY Malate dehydrogenase | 20 |                      | KPGMDRSDLFNVNAGIVK                  | 81  | 18 | 3  | 25.07  | b8b11b12                                                                       | 1961.04 | 103.331 | 2714   | 3 | 654.35  | 6.91   |
| P25077 MDH_SALTY Malate dehydrogenase | 21 |                      | SIGTLSAFEQHSLDAMLDTLKK              | 279 | 22 | 4  | 18.94  | b10b13y12y19                                                                   | 2405.22 | 81.622  | 2526   | 3 | 802.41  | -8.93  |
| P25077 MDH_SALTY Malate dehydrogenase | 22 | Oxidation+M(16)      | SIGTLSAFEQHSLDAMLDTLK               | 279 | 21 | 3  | 24.02  | b10b19b20                                                                      | 2293.15 | 100.835 | 32259  | 3 | 765.06  | 6.18   |
| P25077 MDH_SALTY Malate dehydrogenase | 23 |                      | GTLSAFEQHSLDAMLDTLKK                | 281 | 20 | 1  | 7.64   | b9                                                                             | 2205.10 | 94.135  | 7753   | 3 | 735.70  | -11.63 |
| P0A1D5 CH10_SALTY 10 kDa chaperonin   | 1  |                      | VGDIVIFNDGYGVK                      | 60  | 14 | 20 | 178    | b2b3b4b5°b5b13°b13y1y3y4y5y6°y6y7y8y9y10y12y13y14                              | 1495.77 | 73.081  | 295256 | 2 | 748.39  | -3.75  |
| P0A1D5 CH10_SALTY 10 kDa chaperonin   | 2  |                      | ILDNGTVQPLDVK                       | 47  | 13 | 29 | 219.45 | b2b3b5°b5b8°b8b10b11°b11b12y1y2y3°y3y4y5y6°y6°y6y7y8y9y10y11°y11*y11y12y13*y13 | 1411.78 | 57.114  | 272282 | 2 | 706.39  | -1.64  |
| P0A1D5 CH10_SALTY 10 kDa chaperonin   | 3  |                      | SAGGIVLTGSAAGK                      | 20  | 14 | 16 | 114.65 | b2b4°b4b6°b6b7y2y3y4y6y7y8y9°y9y12y14                                          | 1188.65 | 43.528  | 160325 | 2 | 594.83  | -8.01  |
| P0A1D5 CH10_SALTY 10 kDa chaperonin   | 4  |                      | GEIIAVGK                            | 37  | 8  | 7  | 79.28  | b4b5y3y4y5y6y8                                                                 | 786.46  | 41.208  | 51293  | 2 | 393.73  | -14.36 |
| P0A1D5 CH10_SALTY 10 kDa chaperonin   | 5  |                      | STRGEIIAVGK                         | 34  | 11 | 12 | 140.27 | b3b4b5b6°b6b7b8b9b10y3y4y8                                                     | 1130.64 | 36.860  | 88168  | 2 | 565.83  | -8.31  |

|                                     |    |                       |                                    |     |    |    |        |                                                                                         |         |         |        |   |         |        |
|-------------------------------------|----|-----------------------|------------------------------------|-----|----|----|--------|-----------------------------------------------------------------------------------------|---------|---------|--------|---|---------|--------|
| P0A1D5 CH10_SALTY 10 kDa chaperonin | 6  |                       | VGDIVIFNDGYGVKSEK                  | 60  | 17 | 4  | 23.83  | b10b13y8y10                                                                             | 1839.95 | 92.104  | 12608  | 2 | 920.48  | 0.66   |
| P64076 ENO_SALTY Enolase            | 1  | Carbamidomethyl+C(16) | AAGYELGKDITLAMDCAASEFYK D GK       | 231 | 26 | 26 | 211.06 | b2b3b4b5b6b7b9°b9b13b14y2y3°y3y4y6°y6y7y8y9y10y11y12y13y15y24y26                        | 2824.28 | 97.281  | 321448 | 4 | 706.83  | -13.14 |
| P64076 ENO_SALTY Enolase            | 2  |                       | AFTSEEFTHFLEELTK                   | 266 | 16 | 29 | 212.65 | b2b3°b3b5°b5b6b11b13b16°b16y1y2°y2y3y4y5°y5y6y7y8y9y10°y10y11°y11y12y13y14y16           | 1928.91 | 102.423 | 289395 | 3 | 643.64  | -11.71 |
| P64076 ENO_SALTY Enolase            | 3  |                       | FNQIGSLTETLAAIK                    | 342 | 15 | 33 | 271.31 | b2°b2b3°b3b4°b4b5b6°b6b7°b7b8b11b12°b12b14°b14y1y2y3y4y5y6y7y8y9y10y11y12y13°y13y15°y15 | 1605.89 | 85.443  | 284039 | 2 | 803.45  | 0.46   |
| P64076 ENO_SALTY Enolase            | 4  |                       | SGETEDATIADLAVGTAAGQIK             | 371 | 22 | 27 | 214.44 | b2b3b7°b7b8°b8b11b14°b14b16b22y2y3y4y5y6y7y8y9y10y12°y12y13y14y15y16y22                 | 2118.07 | 75.218  | 261280 | 2 | 1059.54 | 6.45   |
| P64076 ENO_SALTY Enolase            | 5  |                       | YSMPVPMMNINGGEHADNNVDI QEFMIQPVGAK | 143 | 34 | 22 | 140.95 | b2°b2b3°b3b4b5b10b13b23y3y5y6°y6y7y8y9y10y12y13y29y31y34                                | 3759.80 | 98.213  | 195361 | 3 | 1253.94 | 8.57   |
| P64076 ENO_SALTY Enolase            | 6  |                       | GMNTAVGDEGGYAPNLGSNAEA LAVIAEAVK   | 200 | 31 | 22 | 134.52 | b2b4b5°b5°b5b6°b6b8b13y1y2y3y7y8y9y10y12y13y14y15y24y31                                 | 2989.46 | 94.865  | 174497 | 3 | 997.16  | 1.39   |
| P64076 ENO_SALTY Enolase            | 7  |                       | AVGAVNGPIAQAILGK                   | 66  | 16 | 4  | 43.79  | y5y6y10y11                                                                              | 1478.87 | 74.926  | 165962 | 2 | 739.94  | -1.73  |
| P64076 ENO_SALTY Enolase            | 8  |                       | DAGYTAVISHR                        | 360 | 11 | 19 | 148.05 | b2b3°b3b4b6°b6b7b8y2y3°y3y4y5y6°y6y7y9°y9y11                                            | 1189.59 | 40.986  | 96762  | 2 | 595.30  | -4.31  |
| P64076 ENO_SALTY Enolase            | 9  |                       | IQLVGDDLFTVNTK                     | 311 | 14 | 20 | 137.72 | b2°b2b3°b3b8y2y3y4y5°y5y6y8°y8y9y10°y10y11°y11y12y14                                    | 1562.85 | 77.329  | 83684  | 2 | 781.93  | 2.27   |
| P64076 ENO_SALTY Enolase            | 10 |                       | YVLAGEGNK                          | 257 | 9  | 9  | 82.67  | b2y3y4y5y6°y6y7y8y9                                                                     | 950.49  | 32.887  | 70679  | 2 | 475.75  | -9.25  |
| P64076 ENO_SALTY Enolase            | 11 |                       | IEEALGEK                           | 411 | 8  | 8  | 65.76  | b3b4y1y3°y3y6y7y8                                                                       | 888.46  | 30.698  | 45459  | 2 | 444.73  | -10.44 |
| P64076 ENO_SALTY Enolase            | 12 | Carbamidomethyl+C(16) | AAGYELGKDITLAMDCAASEFYK            | 231 | 23 | 13 | 78.37  | b4b5b11°b11b13y3y4°y4y5y7y8y11y23                                                       | 2524.17 | 100.858 | 38290  | 3 | 842.06  | -3.29  |
| P64076 ENO_SALTY Enolase            | 13 |                       | ILKEGIEK                           | 325 | 8  | 7  | 55.24  | b2y4y5°y5y6y7y8                                                                         | 929.56  | 28.456  | 33360  | 2 | 465.28  | -8.27  |
| P64076 ENO_SALTY Enolase            | 14 |                       | GNPTVEAEVHLEGFGVMAAAPS GASTGSR     | 16  | 30 | 5  | 22.52  | b7b9b10y6y30                                                                            | 2856.38 | 91.970  | 28906  | 3 | 952.80  | 6.41   |
| P64076 ENO_SALTY Enolase            | 15 |                       | QYPIVSIEDGLDESDDWGFAYQTK           | 282 | 24 | 5  | 23.4   | y4°y4°y4y5y8                                                                            | 2776.28 | 93.565  | 28401  | 2 | 1388.64 | 6.33   |
| P64076 ENO_SALTY Enolase            | 16 | Carbamidomethyl+C(8)  | DITLAMDCAASEFYKDGK                 | 239 | 18 | 5  | 23.55  | b2b8b9y2y5                                                                              | 2034.93 | 62.231  | 7888   | 3 | 678.98  | 6.00   |
| P64076 ENO_SALTY Enolase            | 17 |                       | GMPLYEHIAELNGTPGK                  | 126 | 17 | 4  | 23.83  | b6b10y3y5                                                                               | 1826.88 | 66.538  | 130399 | 3 | 609.63  | -16.24 |
| P64076 ENO_SALTY Enolase            | 18 |                       | GIANSILIK                          | 333 | 9  | 4  | 55.62  | y3y5y6y7                                                                                | 928.57  | 59.912  | 102992 | 2 | 464.79  | -16.10 |
| P64076 ENO_SALTY Enolase            | 19 |                       | MGSEVFHHLAK                        | 184 | 11 | 9  | 104.46 | b4b8b10y3y4y6y9y10°y10                                                                  | 1255.60 | 41.207  | 97674  | 3 | 419.21  | -19.35 |
| P64076 ENO_SALTY Enolase            | 20 |                       | AAGYELGK                           | 231 | 8  | 4  | 36.94  | b3b5y7°y7                                                                               | 808.42  | 30.661  | 2709   | 2 | 404.71  | -2.49  |
| P64076 ENO_SALTY Enolase            | 21 |                       | VLGDKIQLVGDDLFTVNTK                | 306 | 19 | 6  | 48.36  | b7b8y3y4y6y8                                                                            | 2075.12 | 79.252  | 75144  | 3 | 692.38  | -8.71  |
| P64076 ENO_SALTY Enolase            | 22 |                       | DGKYVLAGEGNK                       | 254 | 12 | 7  | 38.3   | b4°b4b9°b9b11y9°y9                                                                      | 1250.63 | 43.406  | 60163  | 2 | 625.82  | -9.37  |
| P64076 ENO_SALTY Enolase            | 23 |                       | DQAGIDKIMIDLGTENK                  | 85  | 18 | 4  | 39.47  | y5y7y8y9                                                                                | 1975.95 | 75.387  | 29110  | 3 | 659.32  | -8.71  |
| P64076 ENO_SALTY Enolase            | 24 |                       | GKGMNTAVGDEGGYAPNLGSNAEALAVIAEAVK  | 198 | 33 | 9  | 41.97  | b4b5°b5b6°b6b12b15y3y15                                                                 | 3174.59 | 89.671  | 27784  | 3 | 1058.87 | 4.46   |

|                             |    |                      |                                                             |     |    |    |        |                                                                                                                           |         |         |        |   |         |        |
|-----------------------------|----|----------------------|-------------------------------------------------------------|-----|----|----|--------|---------------------------------------------------------------------------------------------------------------------------|---------|---------|--------|---|---------|--------|
| P64076 ENO_SALTY Enolase    | 25 |                      | GMPLYEHIAELNGTPGKYSMPPV<br>MMNIINGGEHADNNVDIQEFMIQP<br>VGAK | 126 | 51 | 6  | 22.07  | b22y5y6*y6y11*y11                                                                                                         | 5567.69 | 97.458  | 8062   | 4 | 1392.68 | 5.26   |
| P64076 ENO_SALTY Enolase    | 26 |                      | YVLAGEGNKAFTEEFTHFLEELT<br>K                                | 257 | 25 | 7  | 30.47  | b7°b7b11b14y5y11y22                                                                                                       | 2860.43 | 81.489  | 7699   | 3 | 954.15  | 8.45   |
| P64076 ENO_SALTY Enolase    | 27 |                      | DAGYTAVISHRSGETEDATIADLA<br>VGTAAGQIK                       | 360 | 33 | 3  | 11.22  | b3b10y8                                                                                                                   | 3288.62 | 126.860 | 5574   | 3 | 1096.88 | -4.53  |
| P64076 ENO_SALTY Enolase    | 28 |                      | YSMPVPMMNINGGEHADNNVDI<br>QEFMIQPVGAQTVK                    | 143 | 37 | 3  | 16.57  | b6b9b13                                                                                                                   | 4087.98 | 106.000 | 2609   | 4 | 1022.75 | 1.31   |
| P64076 ENO_SALTY Enolase    | 29 |                      | EIIDSRCNPTVEAEVHLEGGFVGM<br>AAAPSGASTGSR                    | 10  | 36 | 3  | 10.98  | b24y8y11                                                                                                                  | 3569.69 | 107.334 | 1866   | 4 | 893.18  | -10.26 |
| P64076 ENO_SALTY Enolase    | 30 | Carbamidomethyl+C(8) | DITLAMDCAASEFYKDGK                                          | 239 | 18 | 3  | 16.15  | b11y3y7                                                                                                                   | 2034.94 | 50.920  | 1502   | 4 | 509.49  | 14.04  |
| P64076 ENO_SALTY Enolase    | 31 | Oxidation+M(27)      | YSMPVPMMNINGGEHADNNVDI<br>QEFMIQPVGAK                       | 143 | 34 | 4  | 22.43  | b10b11°b11y10                                                                                                             | 3775.81 | 91.899  | 3361   | 3 | 1259.27 | 12.41  |
| P64076 ENO_SALTY Enolase    | 32 |                      | GYTAVISHR                                                   | 362 | 9  | 2  | 8.01   | b3°b3                                                                                                                     | 1003.53 | 40.997  | 35522  | 2 | 502.27  | -6.57  |
| P64076 ENO_SALTY Enolase    | 33 |                      | LKEGIEK                                                     | 326 | 7  | 0  | 1.13   |                                                                                                                           | 816.47  | 28.457  | 26028  | 2 | 408.74  | -11.29 |
| P64076 ENO_SALTY Enolase    | 34 |                      | LAGEGNK                                                     | 259 | 7  | 0  | 1.51   |                                                                                                                           | 688.36  | 32.881  | 6457   | 1 | 688.36  | -7.71  |
| P64076 ENO_SALTY Enolase    | 35 |                      | TSEEFTHFLEELTK                                              | 268 | 14 | 12 | 98.57  | b3°b3b4°b4b5°b5b8b10b11<br>b12b13°b13                                                                                     | 1710.83 | 102.429 | 5554   | 2 | 855.92  | 5.42   |
| P64076 ENO_SALTY Enolase    | 36 |                      | DGFAYQTK                                                    | 298 | 8  | 0  | 7.17   |                                                                                                                           | 929.44  | 93.528  | 4059   | 1 | 929.44  | 8.34   |
| P64076 ENO_SALTY Enolase    | 37 |                      | TAVISHR                                                     | 364 | 7  | 1  | 8.01   | b3                                                                                                                        | 783.44  | 41.018  | 3300   | 2 | 392.22  | -12.46 |
| P64076 ENO_SALTY Enolase    | 38 |                      | AFTSEEFTHFLEELTK                                            | 266 | 16 | 0  | 4.15   |                                                                                                                           | 1910.90 | 102.424 | 11773  | 3 | 637.64  | -8.69  |
| P64076 ENO_SALTY Enolase    | 39 |                      | DAGYTAVISHR                                                 | 360 | 11 | 0  | 2.26   |                                                                                                                           | 1171.56 | 40.949  | 2769   | 3 | 391.19  | -13.65 |
| P06179 FLIC_SALTY Flagellin | 1  |                      | AQILQQAGTSVLAQANQVPQNVL<br>SLLR                             | 468 | 27 | 38 | 267.02 | b2*b2b3b4*b4b5*b5b6*b6<br>b7*b7b10*b10b11°b11b12<br>b14b15b17b18*b18y1y2y3<br>y4y5y6y7y9y10y11y12*y1<br>2y13*y13y14y24y27 | 2860.61 | 105.086 | 126197 | 3 | 954.21  | 2.48   |
| P06179 FLIC_SALTY Flagellin | 2  |                      | FNSAITNLGNTVNNLTSAR                                         | 432 | 19 | 18 | 105.75 | b2b3°b3b4b5°b5b12b13°b<br>13y3y4y7*y8y11y12y14°y1<br>4y19                                                                 | 2007.04 | 78.095  | 96846  | 2 | 1004.02 | 6.20   |
| P06179 FLIC_SALTY Flagellin | 3  |                      | SQSALGTAIER                                                 | 20  | 11 | 8  | 51.6   | b2*b2y4y6y7y9°y9y11                                                                                                       | 1132.59 | 41.699  | 71454  | 2 | 566.80  | -7.33  |
| P06179 FLIC_SALTY Flagellin | 4  |                      | AQVINTNSLSLLTQNNLNK                                         | 1   | 19 | 14 | 59.59  | b1b2°b2b3b4y1y2y6*y6y7<br>y10y13y15y19                                                                                    | 2085.14 | 74.610  | 57331  | 2 | 1043.07 | 3.16   |
| P06179 FLIC_SALTY Flagellin | 5  |                      | VSGQTQFNGVK                                                 | 125 | 11 | 8  | 32.05  | b2°b2y7*y7y9y10*y10y11                                                                                                    | 1164.59 | 32.949  | 54296  | 2 | 582.80  | -6.71  |
| P06179 FLIC_SALTY Flagellin | 6  |                      | IDAALAQVDTLR                                                | 411 | 12 | 18 | 181.5  | b2b3b4b5b7b8°b8*b8b9y3<br>y4y6y7y9y10y11°y11y12                                                                           | 1285.70 | 60.971  | 52835  | 2 | 643.36  | -5.22  |
| P06179 FLIC_SALTY Flagellin | 7  |                      | NANDGISIAQTTEGALNEINNQL<br>R                                | 66  | 25 | 12 | 23.73  | b1°b1b2b4b6°b6y2y3y6*y<br>6y9y25                                                                                          | 2670.33 | 86.488  | 50961  | 2 | 1335.67 | 9.78   |
| P06179 FLIC_SALTY Flagellin | 8  |                      | INSAKDDAAGQAIANR                                            | 37  | 16 | 14 | 112.1  | b6b10y1y3*y3y4y5y7*y7y<br>8y9y10y11y16                                                                                    | 1614.80 | 29.767  | 44732  | 3 | 538.94  | -14.36 |
| P06179 FLIC_SALTY Flagellin | 9  |                      | QINSQTLGLDTLNVQQK                                           | 161 | 17 | 11 | 51.26  | b7b8°b8b17y1y5*y5y6y10<br>y12y17                                                                                          | 1900.02 | 65.088  | 35302  | 2 | 950.51  | 4.30   |
| P06179 FLIC_SALTY Flagellin | 10 |                      | SDLGAVQNR                                                   | 423 | 9  | 8  | 31.3   | b1b4°b4b7°b7°b7y8y9                                                                                                       | 959.50  | 36.360  | 19265  | 2 | 480.25  | 6.36   |
| P06179 FLIC_SALTY Flagellin | 11 |                      | TEVVSIGGK                                                   | 370 | 9  | 5  | 31.3   | b3b4°b4y8y9                                                                                                               | 889.49  | 38.283  | 7476   | 2 | 445.25  | -4.94  |
| P06179 FLIC_SALTY Flagellin | 12 |                      | VSDTAATVTGYADTTIALDNSTF<br>K                                | 180 | 24 | 6  | 19.42  | b1y1y3y7y10*y10                                                                                                           | 2462.23 | 111.540 | 3659   | 3 | 821.41  | 14.87  |
| P06179 FLIC_SALTY Flagellin | 13 |                      | ELAVQSANSTNSQSDLSIQAEIT<br>QR                               | 93  | 26 | 3  | 12.49  | b13y3y6                                                                                                                   | 2805.34 | 70.261  | 16062  | 3 | 935.78  | -4.35  |
| P06179 FLIC_SALTY Flagellin | 14 |                      | IEDSDYATEVSNMSR                                             | 453 | 15 | 3  | 18.79  | b10y7y10                                                                                                                  | 1716.74 | 53.133  | 11246  | 2 | 858.88  | 2.77   |
| P06179 FLIC_SALTY Flagellin | 15 |                      | ASATGLGGTDQK                                                | 204 | 12 | 11 | 94.05  | b6°b6b7b8b9°b9y4y7*y7y8<br>y9                                                                                             | 1105.54 | 32.462  | 1586   | 2 | 553.27  | -10.38 |
| P06179 FLIC_SALTY Flagellin | 16 |                      | SRIEDSDYATEVSNMSR                                           | 451 | 17 | 12 | 113.41 | b4b5b7b8b10°b10b11y3y5<br>y6y8y12                                                                                         | 1959.85 | 50.300  | 81317  | 3 | 653.95  | -11.46 |

|                                                              |    |                                                     |                                  |     |    |    |        |                                                                                                                                                                   |         |         |        |   |         |        |
|--------------------------------------------------------------|----|-----------------------------------------------------|----------------------------------|-----|----|----|--------|-------------------------------------------------------------------------------------------------------------------------------------------------------------------|---------|---------|--------|---|---------|--------|
| P06179 FLIC_SALTY Flagellin                                  | 17 |                                                     | YKVSDTAATVTGYADTTIALDNS<br>TFK   | 178 | 26 | 5  | 18.95  | b9°b9y4y7y15                                                                                                                                                      | 2753.35 | 136.594 | 8928   | 3 | 918.46  | 0.53   |
| P06179 FLIC_SALTY Flagellin                                  | 18 |                                                     | YTADDGTSKTALNK                   | 349 | 14 | 5  | 25.4   | b12b13°b13°b13y13                                                                                                                                                 | 1484.70 | 91.470  | 6394   | 2 | 742.85  | -14.63 |
| P06179 FLIC_SALTY Flagellin                                  | 19 |                                                     | TYAASKAEGHNFK                    | 379 | 13 | 4  | 26.12  | b10°b10b11y12                                                                                                                                                     | 1423.70 | 74.414  | 4283   | 2 | 712.35  | 2.74   |
| P06179 FLIC_SALTY Flagellin                                  | 20 |                                                     | ASATGLGGTDQKIDGDLK               | 204 | 18 | 3  | 25.07  | b9b11b12                                                                                                                                                          | 1746.87 | 76.519  | 3940   | 2 | 873.94  | -8.80  |
| P06179 FLIC_SALTY Flagellin                                  | 21 |                                                     | AEGHNFKAQPDLAEEAAATTENP<br>LQK   | 385 | 26 | 3  | 12.49  | b5b23y14                                                                                                                                                          | 2752.37 | 88.299  | 2057   | 3 | 918.13  | 4.97   |
| P06179 FLIC_SALTY Flagellin                                  | 22 | Phosphoryl STY()                                    | AQVINTNSLSLLTQNNLNK              | 1   | 19 | 13 | 77.14  | b3b8°b8b11°b11b12b13°b<br>13y10y11°y11y12°y12                                                                                                                     | 2165.07 | 81.105  | 84627  | 2 | 1083.04 | -6.99  |
| P06179 FLIC_SALTY Flagellin                                  | 23 | Phosphoryl STY(22)                                  | TNGEVTLAGGATSPLTGGLPATA<br>TEDVK | 252 | 28 | 11 | 30.86  | b7°b7°b7b8°b8°b8b11°b1<br>1b22y5y14                                                                                                                               | 2708.26 | 123.855 | 26621  | 4 | 677.82  | -13.97 |
| P06179 FLIC_SALTY Flagellin                                  | 24 | Phosphoryl STY()                                    | MAQVINTNSLSLLTQNNLNK             | 0   | 20 | 3  | 14.89  | b3b9y11                                                                                                                                                           | 2296.10 | 77.411  | 3033   | 4 | 574.78  | -12.97 |
| P0A1P0 G3P1_SALTY Glyceraldehyde-3-<br>phohate dehydrogenase | 1  |                                                     | VINDNFGIIEGLMTTVHATTATQK         | 160 | 24 | 48 | 303.52 | b1b2b3°b3b4°b4b5°b5°b5<br>b6°b6°b6b7°b7°b7y2°y2y3<br>y4y6°y6y7°y7°y7y8°y8°y8<br>y9y10°y10y11y14y15°y15°<br>y15y16°y16y17y18y19y20<br>y21y22°y22y23°y23y24°y2<br>4 | 2574.32 | 97.685  | 502788 | 3 | 858.78  | -2.66  |
| P0A1P0 G3P1_SALTY Glyceraldehyde-3-<br>phohate dehydrogenase | 2  |                                                     | LVSWYDNETGYSNK                   | 307 | 14 | 8  | 90.3   | y4y5y6y9y10y11y12y14                                                                                                                                              | 1675.77 | 57.882  | 270371 | 2 | 838.39  | 4.15   |
| P0A1P0 G3P1_SALTY Glyceraldehyde-3-<br>phohate dehydrogenase | 3  |                                                     | AGIALNDNFVK                      | 296 | 11 | 14 | 86.95  | b3b4y2y4y5°y5°y5y6y7°y7<br>°y7y8°y8y11                                                                                                                            | 1161.62 | 61.098  | 242479 | 2 | 581.31  | -6.94  |
| P0A1P0 G3P1_SALTY Glyceraldehyde-3-<br>phohate dehydrogenase | 4  |                                                     | VLDLIAHISK                       | 321 | 10 | 10 | 89.59  | b2b3y3y4y5°y5y6y7y8y10                                                                                                                                            | 1108.66 | 64.206  | 201985 | 2 | 554.84  | -7.60  |
| P0A1P0 G3P1_SALTY Glyceraldehyde-3-<br>phohate dehydrogenase | 5  |                                                     | GASQNIIPSSTGAAK                  | 198 | 15 | 20 | 125.55 | b3b5°b5°b5b6°b6°b6b7°b<br>7y2y4y5y7y8°y8y9y10y11y<br>15°y15                                                                                                       | 1401.72 | 40.720  | 164163 | 2 | 701.36  | -8.36  |
| P0A1P0 G3P1_SALTY Glyceraldehyde-3-<br>phohate dehydrogenase | 6  |                                                     | VPTPNVSVVDLTVR                   | 232 | 14 | 18 | 133.74 | b3°b3b5°b5°b5b12y1y2y3y<br>4y5y8y9y10y11y12°y12y14                                                                                                                | 1495.85 | 70.700  | 150705 | 2 | 748.43  | -0.49  |
| P0A1P0 G3P1_SALTY Glyceraldehyde-3-<br>phohate dehydrogenase | 7  |                                                     | AATYEQIK                         | 249 | 8  | 3  | 41.71  | y4y5y6                                                                                                                                                            | 923.47  | 30.364  | 97338  | 2 | 462.24  | -12.29 |
| P0A1P0 G3P1_SALTY Glyceraldehyde-3-<br>phohate dehydrogenase | 8  |                                                     | SDIEIVAINDLLDAEYMAYMLK           | 24  | 22 | 26 | 213.26 | b2b3b4°b4b5°b5b6°b6b7°b<br>7b8b11y1y2y3y4y5y6y7y8<br>y9y10y11y12y14y22                                                                                            | 2530.24 | 125.418 | 86913  | 3 | 844.08  | -2.41  |
| P0A1P0 G3P1_SALTY Glyceraldehyde-3-<br>phohate dehydrogenase | 9  |                                                     | VLPELNGK                         | 217 | 8  | 11 | 55.24  | b2y2y3y4°y4y5°y5y6°y6y<br>8°y8                                                                                                                                    | 869.50  | 44.442  | 61775  | 2 | 435.25  | -13.20 |
| P0A1P0 G3P1_SALTY Glyceraldehyde-3-<br>phohate dehydrogenase | 10 |                                                     | VVLTPGSKDNTPMFVK                 | 116 | 16 | 10 | 46.53  | b3b12y3y7°y7°y7y13°y13y<br>14y16                                                                                                                                  | 1732.91 | 57.060  | 52135  | 3 | 578.31  | -11.90 |
| P0A1P0 G3P1_SALTY Glyceraldehyde-3-<br>phohate dehydrogenase | 11 | Carbamidomethyl+C(12)<br>;Carbamidomethyl+C(16<br>) | YEQDIVSNASCTTNCLAPLAK            | 138 | 22 | 6  | 18.94  | b4b14b22y2y3y14                                                                                                                                                   | 2412.12 | 97.490  | 3447   | 4 | 603.79  | 1.32   |
| P0A1P0 G3P1_SALTY Glyceraldehyde-3-<br>phohate dehydrogenase | 12 |                                                     | LTGMAFR                          | 225 | 7  | 3  | 41.34  | y3y5y6                                                                                                                                                            | 795.40  | 48.392  | 89222  | 2 | 398.20  | -21.03 |
| P0A1P0 G3P1_SALTY Glyceraldehyde-3-<br>phohate dehydrogenase | 13 |                                                     | VGINGFGR                         | 4   | 8  | 3  | 49.49  | y3y5y7                                                                                                                                                            | 819.43  | 47.095  | 61092  | 2 | 410.22  | -19.81 |

|                                                          |    |                                                      |                                         |     |    |    |        |                                                                                                                                   |         |         |        |   |         |        |
|----------------------------------------------------------|----|------------------------------------------------------|-----------------------------------------|-----|----|----|--------|-----------------------------------------------------------------------------------------------------------------------------------|---------|---------|--------|---|---------|--------|
| P0A1P0 G3P1_SALTY Glyceraldehyde-3-phohate dehydrogenase | 14 | Carbamidomethyl+C(20)                                | GVLGYTEDDVVSTDFNGEVCTSV<br>FDAK         | 269 | 27 | 5  | 23.08  | b7°b7b8b13°b13                                                                                                                    | 2924.31 | 97.104  | 2500   | 4 | 731.83  | -0.75  |
| P0A1P0 G3P1_SALTY Glyceraldehyde-3-phohate dehydrogenase | 15 | Carbamidomethyl+C(18)<br>;Carbamidomethyl+C(22)<br>) | GANFDKYEQDIVSNASCTTNCL<br>APLAK         | 132 | 28 | 33 | 248.47 | b3b4b5b7°b7°b7b8b11b12<br>b13°b13°b13b16b24°b24b<br>27y3y4y5y6y9°y9y10y11*y<br>11y12°y12*y12y13y14y15<br>*y15y16                  | 3044.42 | 66.180  | 295528 | 3 | 1015.48 | 2.09   |
| P0A1P0 G3P1_SALTY Glyceraldehyde-3-phohate dehydrogenase | 16 |                                                      | VPTPNVSVVDLTVRLEK                       | 232 | 17 | 4  | 16.91  | b3b5*b5y14                                                                                                                        | 1866.05 | 76.008  | 47630  | 3 | 622.69  | -12.63 |
| P0A1P0 G3P1_SALTY Glyceraldehyde-3-phohate dehydrogenase | 17 |                                                      | RSDIEIVAINDLLDAEYMayMLK                 | 23  | 23 | 11 | 108.43 | b3b5b6b7b8y3y4y6y7y10y<br>11                                                                                                      | 2686.35 | 117.622 | 31774  | 3 | 896.12  | 1.00   |
| P0A1P0 G3P1_SALTY Glyceraldehyde-3-phohate dehydrogenase | 18 |                                                      | SDIEIVAINDLLDAEYMayMLKYD<br>STHGR       | 24  | 29 | 6  | 17.49  | b10y6y8°y8y10°y10                                                                                                                 | 3346.64 | 72.886  | 17471  | 4 | 837.42  | 14.01  |
| P0A1P0 G3P1_SALTY Glyceraldehyde-3-phohate dehydrogenase | 19 | Carbamidomethyl+C(28)                                | AAAEGEMKGVLGYTEDDVVSTD<br>FNGEVCTSVFDAK | 261 | 35 | 5  | 24.75  | b3b12b13b17y8                                                                                                                     | 3711.71 | 101.985 | 3955   | 4 | 928.68  | 10.06  |
| P0A1P0 G3P1_SALTY Glyceraldehyde-3-phohate dehydrogenase | 20 |                                                      | KHITAGAK                                | 107 | 8  | 3  | 41.71  | y3y4y5                                                                                                                            | 825.49  | 12.743  | 2089   | 2 | 413.25  | -8.06  |
| P0A1P0 G3P1_SALTY Glyceraldehyde-3-phohate dehydrogenase | 21 |                                                      | DNTPMFVKGANFDK                          | 124 | 14 | 5  | 28.56  | b4b8y6°y6y10                                                                                                                      | 1583.75 | 88.122  | 1890   | 3 | 528.59  | -1.54  |
| P0A1P0 G3P1_SALTY Glyceraldehyde-3-phohate dehydrogenase | 22 |                                                      | LDLIAHISK                               | 322 | 9  | 1  | 8.42   | b3                                                                                                                                | 1009.59 | 64.202  | 56943  | 2 | 505.30  | -10.64 |
| P0A1P0 G3P1_SALTY Glyceraldehyde-3-phohate dehydrogenase | 23 |                                                      | DLIAHISK                                | 323 | 8  | 3  | 37.7   | b3b4b5                                                                                                                            | 896.51  | 64.211  | 56766  | 2 | 448.76  | -13.62 |
| P0A1P0 G3P1_SALTY Glyceraldehyde-3-phohate dehydrogenase | 24 |                                                      | LNDNFVK                                 | 300 | 7  | 1  | 8.01   | b6                                                                                                                                | 849.44  | 61.112  | 8356   | 1 | 849.44  | -9.41  |
| P0A1P0 G3P1_SALTY Glyceraldehyde-3-phohate dehydrogenase | 25 |                                                      | LIAHISK                                 | 324 | 7  | 1  | 8.42   | b4                                                                                                                                | 781.49  | 64.212  | 3578   | 2 | 391.25  | -5.94  |
| P0A1P0 G3P1_SALTY Glyceraldehyde-3-phohate dehydrogenase | 26 |                                                      | AATYEQIK                                | 249 | 8  | 0  | 1.13   |                                                                                                                                   | 906.46  | 30.358  | 26413  | 2 | 453.73  | 3.23   |
| P0A1P0 G3P1_SALTY Glyceraldehyde-3-phohate dehydrogenase | 27 |                                                      | VVLTGPSKDNTPMFVK                        | 116 | 16 | 0  | 4.15   |                                                                                                                                   | 1715.88 | 57.072  | 1509   | 3 | 572.63  | -12.59 |
| P0A1S2 HNS_SALTY DNA-binding protein H-NS                | 1  |                                                      | EMLIADGIDPNELLNSMAAAK                   | 62  | 21 | 42 | 310.2  | b2°b2b3°b3b4°b4b5°b5b6°<br>b6b7°b7b8°b8b9°b9b11°b1<br>1b12°b12b21y1y2y3y4y5y<br>6y7*y7y8y9y10y12*y12y1<br>3y14y15°y15y16y17y18y21 | 2216.10 | 96.692  | 468363 | 2 | 1108.56 | 4.63   |
| P0A1S2 HNS_SALTY DNA-binding protein H-NS                | 2  |                                                      | YSYVDENGETK                             | 96  | 11 | 12 | 102.7  | b2b3°b3y2y4y5y6y7y8y9y1<br>0y11                                                                                                   | 1304.55 | 32.563  | 138508 | 2 | 652.78  | -8.05  |
| P0A1S2 HNS_SALTY DNA-binding protein H-NS                | 3  |                                                      | REEESAAAAEVEER                          | 40  | 14 | 21 | 158.73 | b2b3°b3b5°b5b6°b6b7b8b1<br>0b12y2y3°y3y4°y4y5°y5y6<br>y7y14                                                                       | 1575.71 | 31.359  | 120753 | 3 | 525.91  | -11.39 |
| P0A1S2 HNS_SALTY DNA-binding protein H-NS                | 4  |                                                      | LEVVVNER                                | 32  | 8  | 4  | 36.94  | b7y4°y4y6                                                                                                                         | 957.53  | 42.388  | 17826  | 2 | 479.27  | -7.20  |



|                                           |    |                                          |                                  |     |    |    |        |                                                                                                         |         |         |        |   |         |        |
|-------------------------------------------|----|------------------------------------------|----------------------------------|-----|----|----|--------|---------------------------------------------------------------------------------------------------------|---------|---------|--------|---|---------|--------|
| P0A1S2 HNS_SALTY DNA-binding protein H-NS | 5  |                                          | SEALK                            | 1   | 5  | 2  | 27.05  | b3y4                                                                                                    | 547.30  | 43.084  | 7504   | 1 | 547.30  | -12.27 |
| P0A1S2 HNS_SALTY DNA-binding protein H-NS | 6  | Carbamidomethyl+C(2)                     | ECTLETLEEMLEK                    | 19  | 13 | 5  | 21.35  | b9y7°y7y9°y9                                                                                            | 1624.76 | 88.163  | 3216   | 3 | 542.26  | 12.17  |
| P0A1S2 HNS_SALTY DNA-binding protein H-NS | 7  | Carbamidomethyl+C(2)                     | ECTLETLEEMLEKLEVVVNER            | 19  | 21 | 34 | 284.19 | b3°b3b4°b4b6b7°b7b9b12°<br>b12y3°y3°y3y4°y4y5°y5°y<br>5y6y7°y7°y7y8y9y10y11y1<br>2y13y14y15y16y17y18y19 | 2563.26 | 123.142 | 212879 | 3 | 855.09  | -0.86  |
| P0A1S2 HNS_SALTY DNA-binding protein H-NS | 8  |                                          | QLEDFLIKE                        | 128 | 9  | 3  | 39.08  | y3y6y7                                                                                                  | 1134.59 | 70.966  | 186791 | 2 | 567.80  | -12.37 |
| P0A1S2 HNS_SALTY DNA-binding protein H-NS | 9  |                                          | YSYVDENGETKKTWTGQGR              | 96  | 18 | 17 | 154.78 | b3°b3b6y4y5°y5y6°y6y8°y<br>8y11y12y13y14y15y16y17                                                       | 2090.92 | 46.417  | 105008 | 3 | 697.65  | -8.76  |
| P0A1S2 HNS_SALTY DNA-binding protein H-NS | 10 |                                          | EMLIADGIDPNELLNSMAAAKSGT<br>K    | 62  | 25 | 4  | 19.53  | b4b7b11y5                                                                                               | 2589.30 | 82.675  | 35964  | 3 | 863.77  | 5.00   |
| P0A1S2 HNS_SALTY DNA-binding protein H-NS | 11 |                                          | LQYREMLIADGIDPNELLNSMAA<br>AK    | 57  | 26 | 5  | 28.45  | b6b8b12b13y5                                                                                            | 2904.50 | 99.338  | 4984   | 4 | 726.88  | 12.78  |
| P0A1S2 HNS_SALTY DNA-binding protein H-NS | 12 |                                          | AARPAKYSYVDENGETK                | 90  | 17 | 4  | 27.05  | b12y6y14y16                                                                                             | 1898.91 | 104.540 | 2808   | 2 | 949.96  | -5.72  |
| P0A1S2 HNS_SALTY DNA-binding protein H-NS | 13 | Oxidation+M(2)                           | EMLIADGIDPNELLNSMAAAK            | 62  | 21 | 7  | 32.3   | b8y3y7°y7y12°y12y13                                                                                     | 2232.11 | 91.370  | 17241  | 2 | 1116.56 | 10.83  |
| P0A1S2 HNS_SALTY DNA-binding protein H-NS | 14 | Carbamidomethyl+C(6);<br>Oxidation+M(14) | AQARECTLETLEEMLEK                | 15  | 17 | 4  | 16.91  | b5y5y7°y7                                                                                               | 2066.97 | 108.961 | 2645   | 3 | 689.66  | -0.71  |
| P65702 PGK_SALTY Phohoglycerate kinase    | 1  | Carbamidomethyl+C(6)                     | FADVACAGPLLAELDALGK              | 156 | 20 | 13 | 94.99  | b2b3b7b8y4y5°y5y8y9y13y<br>14y15y20                                                                     | 2002.04 | 98.724  | 224640 | 2 | 1001.53 | 6.28   |
| P65702 PGK_SALTY Phohoglycerate kinase    | 2  |                                          | SVNDVKEDEQILDIGDASAQQLAE<br>ILK  | 272 | 27 | 30 | 195.28 | b1b2b4b5°b5°b5b8b9b11b<br>12b13°b13b14b18b22b25b<br>26y1y2y3y4y5y7y10y13°y<br>13y14y15°y15y27           | 2941.50 | 99.629  | 198090 | 3 | 981.17  | 0.58   |
| P65702 PGK_SALTY Phohoglycerate kinase    | 3  |                                          | VMVTSHLGRPTEGEYNEEFSLPV<br>VNYLK | 53  | 29 | 18 | 127.69 | b2b6b14b17b18b19b20°b2<br>0b21°b21b22y3y4y5y7y8y<br>10y29                                               | 3321.66 | 91.813  | 154138 | 4 | 831.17  | -7.50  |
| P65702 PGK_SALTY Phohoglycerate kinase    | 4  |                                          | VLPVAMLEER                       | 373 | 11 | 3  | 36.82  | y4y5y6                                                                                                  | 1227.67 | 79.708  | 143761 | 2 | 614.34  | -7.95  |
| P65702 PGK_SALTY Phohoglycerate kinase    | 5  | Carbamidomethyl+C(5)                     | LLTTCDIPVPTDVR                   | 244 | 14 | 17 | 107.08 | b2b3b6°b6b7°b7b9°b9y1y2<br>y5y7y8y10y11y12y14                                                           | 1599.84 | 68.438  | 126501 | 2 | 800.43  | 1.75   |
| P65702 PGK_SALTY Phohoglycerate kinase    | 6  |                                          | VATEFSETAPATLK                   | 258 | 14 | 17 | 147.94 | b2b3b4°b4b5b12b14y2y3y<br>5y6y7y9y10y11y12y14                                                           | 1464.76 | 52.423  | 100094 | 2 | 732.88  | 0.50   |
| P65702 PGK_SALTY Phohoglycerate kinase    | 7  |                                          | TILWNGPVGVFEPNFR                 | 302 | 17 | 22 | 137.76 | b2b13°b13y1y3°y3y4°y4y<br>5y6°y6y7y10y11°y11y12°y<br>12°y12y13°y13y14y17                                | 1993.05 | 106.047 | 92132  | 2 | 997.03  | 6.68   |
| P65702 PGK_SALTY Phohoglycerate kinase    | 8  |                                          | ADLNPVKEGK                       | 19  | 11 | 15 | 113.22 | b2b4°b4b5b9y1y3°y3y4°y4<br>y5y6y7y8y11                                                                  | 1169.65 | 36.426  | 73524  | 2 | 585.33  | -3.86  |
| P65702 PGK_SALTY Phohoglycerate kinase    | 9  |                                          | ASLPTIELALK                      | 38  | 11 | 6  | 66.89  | y3y4y5y7y8y11                                                                                           | 1155.69 | 76.943  | 70860  | 2 | 578.35  | -7.08  |
| P65702 PGK_SALTY Phohoglycerate kinase    | 10 |                                          | LVKDYLDGVDVAEGELVVLENV<br>R      | 90  | 23 | 15 | 84.28  | b2b7b10b13b14b15°b15b1<br>7y2y3y4°y4y5y11y23                                                            | 2544.35 | 96.480  | 70675  | 3 | 848.79  | -3.36  |
| P65702 PGK_SALTY Phohoglycerate kinase    | 11 |                                          | LTVLDSLK                         | 197 | 9  | 9  | 58.63  | b2°b2y1y2y4y5y7y8y9                                                                                     | 975.56  | 61.546  | 70345  | 2 | 488.28  | -10.01 |
| P65702 PGK_SALTY Phohoglycerate kinase    | 12 |                                          | TILWNGPVGVFEPNFRK                | 302 | 18 | 9  | 76.37  | b2y5y6y10y13y14y15y16y<br>18                                                                            | 2121.11 | 96.376  | 50292  | 3 | 707.71  | -8.98  |

|                                        |    |                      |                                  |     |    |    |        |                                                                                                           |         |         |        |   |         |        |
|----------------------------------------|----|----------------------|----------------------------------|-----|----|----|--------|-----------------------------------------------------------------------------------------------------------|---------|---------|--------|---|---------|--------|
| P65702 PGK_SALTY Phohoglycerate kinase | 13 |                      | MTDLDLAGKR                       | 5   | 10 | 7  | 72.53  | y2y3y4y5y7y9y10                                                                                           | 1119.58 | 42.137  | 44014  | 2 | 560.29  | -3.27  |
| P65702 PGK_SALTY Phohoglycerate kinase | 14 | Carbamidomethyl+C(5) | YAAALCDVFVMDAFGTAHR              | 128 | 18 | 14 | 107.26 | b2b3b5b7b9y1y4y5y6y7y9y12y13y18                                                                           | 2043.94 | 89.695  | 30654  | 3 | 681.98  | -2.69  |
| P65702 PGK_SALTY Phohoglycerate kinase | 15 |                      | IADQLIVGGGIANTFVAAQGHSVGK        | 206 | 25 | 10 | 56.59  | b3b4b5y2y11*y11y13*y13y14y18                                                                              | 2423.29 | 77.933  | 30086  | 3 | 808.44  | -5.44  |
| P65702 PGK_SALTY Phohoglycerate kinase | 16 |                      | DYLDGVDVAEGELVVLENVR             | 93  | 20 | 6  | 20.59  | b10b19y1y7y16y20                                                                                          | 2204.13 | 115.288 | 13944  | 3 | 735.38  | 8.09   |
| P65702 PGK_SALTY Phohoglycerate kinase | 17 |                      | SVNDVK                           | 272 | 6  | 2  | 27.43  | b4b5                                                                                                      | 661.35  | 28.068  | 40716  | 1 | 661.35  | -9.51  |
| P65702 PGK_SALTY Phohoglycerate kinase | 18 |                      | SLYEADLVDEAK                     | 231 | 12 | 5  | 33.23  | b5°b5b7y3y8                                                                                               | 1352.66 | 58.081  | 14830  | 2 | 676.83  | 0.99   |
| P65702 PGK_SALTY Phohoglycerate kinase | 19 |                      | ADLNVPVK                         | 19  | 8  | 4  | 36.94  | b7°b7y3y7                                                                                                 | 855.49  | 42.301  | 12292  | 2 | 428.25  | -8.85  |
| P65702 PGK_SALTY Phohoglycerate kinase | 20 |                      | ISYISTGGGAFLEFVEGK               | 355 | 18 | 5  | 33.93  | b3b4b12y8y11                                                                                              | 1874.91 | 47.814  | 2309   | 3 | 625.64  | -22.01 |
| P65702 PGK_SALTY Phohoglycerate kinase | 21 |                      | VMVTSHLGRPTEGEYNEEFSLLPV VNYLKDK | 53  | 31 | 6  | 22.35  | b6b12°b12b13°b13y27                                                                                       | 3564.79 | 95.699  | 22644  | 4 | 891.95  | -3.97  |
| P65702 PGK_SALTY Phohoglycerate kinase | 22 | Carbamidomethyl+C(6) | RLLTTCDIPVPTDVR                  | 243 | 15 | 3  | 24.81  | b7b8y7                                                                                                    | 1755.92 | 64.002  | 6180   | 3 | 585.98  | -13.07 |
| P65702 PGK_SALTY Phohoglycerate kinase | 23 | Carbamidomethyl+C(6) | FADVACAGPLLAELDALGKALK           | 156 | 23 | 3  | 35.33  | b12b13b14                                                                                                 | 2314.25 | 123.993 | 4931   | 3 | 772.09  | 0.21   |
| P65702 PGK_SALTY Phohoglycerate kinase | 24 |                      | EPARPMVAIVGGSKVSTK               | 179 | 18 | 3  | 23.31  | b4b6b16                                                                                                   | 1827.02 | 84.951  | 1624   | 2 | 914.01  | 2.61   |
| P65702 PGK_SALTY Phohoglycerate kinase | 25 |                      | DLDLAGKR                         | 7   | 8  | 1  | 8.42   | b3                                                                                                        | 887.50  | 42.123  | 24279  | 2 | 444.25  | 6.05   |
| P65702 PGK_SALTY Phohoglycerate kinase | 26 |                      | TDLDLAGKR                        | 6   | 9  | 1  | 8.42   | b4                                                                                                        | 988.54  | 42.135  | 18320  | 2 | 494.77  | -6.54  |
| P52616 FLJB_SALTY Phase 2 flagellin    | 1  |                      | AQILQQAGTSVLAQANQVPQNVLSLLR      | 479 | 27 | 38 | 267.02 | b2*b2b3b4*b4b5*b5b6*b6b7*b7b10*b10b11°b11b12b14b15b17b18*b18y1y2y3y4y5y6y7y9y10y11y12*y12y13*y13y14y24y27 | 2860.61 | 105.086 | 126197 | 3 | 954.21  | 2.48   |
| P52616 FLJB_SALTY Phase 2 flagellin    | 2  |                      | SQSALGTAIER                      | 20  | 11 | 8  | 51.6   | b2*b2y4y6y7y9°y9y11                                                                                       | 1132.59 | 41.699  | 71454  | 2 | 566.80  | -7.33  |
| P52616 FLJB_SALTY Phase 2 flagellin    | 3  |                      | AQVINTNSLSLLTQNNLNK              | 1   | 19 | 14 | 59.59  | b1b2*b2b3b4y1y2y6*y6y7y10y13y15y19                                                                        | 2085.14 | 74.610  | 57331  | 2 | 1043.07 | 3.16   |
| P52616 FLJB_SALTY Phase 2 flagellin    | 4  |                      | VSGQTQFNGVK                      | 125 | 11 | 8  | 32.05  | b2°b2y7*y7y9y10*y10y11                                                                                    | 1164.59 | 32.949  | 54296  | 2 | 582.80  | -6.71  |
| P52616 FLJB_SALTY Phase 2 flagellin    | 5  |                      | NANDGISIAQTTEGALNEINNLR          | 66  | 25 | 12 | 23.73  | b1*b1b2b4b6*b6y2y3y6*y6y9y25                                                                              | 2670.33 | 86.488  | 50961  | 2 | 1335.67 | 9.78   |
| P52616 FLJB_SALTY Phase 2 flagellin    | 6  |                      | INSAKDDAAGQAIANR                 | 37  | 16 | 14 | 112.1  | b6b10y1y3*y3y4y5y7*y7y8y9y10y11y16                                                                        | 1614.80 | 29.767  | 44732  | 3 | 538.94  | -14.36 |
| P52616 FLJB_SALTY Phase 2 flagellin    | 7  |                      | SDLGAVQNR                        | 434 | 9  | 8  | 31.3   | b1b4°b4b7°b7*b7y8y9                                                                                       | 959.50  | 36.360  | 19265  | 2 | 480.25  | 6.36   |
| P52616 FLJB_SALTY Phase 2 flagellin    | 8  |                      | AQPELAEEAAK                      | 403 | 11 | 6  | 25.06  | b3b8°b8*b8y1y7                                                                                            | 1098.59 | 36.439  | 11455  | 2 | 549.80  | 14.33  |
| P52616 FLJB_SALTY Phase 2 flagellin    | 9  |                      | DTPAVVSADAK                      | 288 | 11 | 4  | 25.06  | b3b6y2y3                                                                                                  | 1073.54 | 26.817  | 2683   | 2 | 537.27  | -6.14  |
| P52616 FLJB_SALTY Phase 2 flagellin    | 10 |                      | FNSAITNLGNTVNNLSEAR              | 443 | 19 | 5  | 26.72  | b4°b4b11b12y11                                                                                            | 2035.01 | 74.411  | 2233   | 2 | 1018.01 | -5.64  |
| P52616 FLJB_SALTY Phase 2 flagellin    | 11 |                      | TTMPAGATTK                       | 271 | 10 | 4  | 27.7   | b4b9°b9y5                                                                                                 | 978.49  | 35.487  | 14005  | 2 | 489.75  | -4.24  |
| P52616 FLJB_SALTY Phase 2 flagellin    | 12 |                      | FTANIK                           | 53  | 6  | 1  | 13.9   | y3                                                                                                        | 693.38  | 33.376  | 11892  | 2 | 347.20  | -13.38 |
| P52616 FLJB_SALTY Phase 2 flagellin    | 13 |                      | TAANQLGGVDGK                     | 369 | 12 | 5  | 38.3   | b4*b4y3y5y8                                                                                               | 1130.60 | 50.384  | 5686   | 2 | 565.80  | 18.90  |

|                                                                           |    |                    |                                               |     |    |    |        |                                                                                   |         |         |        |   |         |        |
|---------------------------------------------------------------------------|----|--------------------|-----------------------------------------------|-----|----|----|--------|-----------------------------------------------------------------------------------|---------|---------|--------|---|---------|--------|
| P52616 FLJB_SALTY Phase 2 flagellin                                       | 14 |                    | AYANNGTTLDVSLDDAAIK                           | 189 | 20 | 3  | 21.68  | b3b10b13                                                                          | 2009.02 | 75.680  | 4794   | 3 | 670.34  | 18.90  |
| P52616 FLJB_SALTY Phase 2 flagellin                                       | 15 |                    | IDAALAQVDALR                                  | 422 | 12 | 4  | 30.21  | b3°b3b9b10                                                                        | 1255.69 | 103.582 | 4128   | 2 | 628.35  | -11.47 |
| P52616 FLJB_SALTY Phase 2 flagellin                                       | 16 |                    | AYDVK                                         | 177 | 5  | 4  | 40.58  | b3b4y4°y4                                                                         | 595.30  | 32.454  | 3492   | 1 | 595.30  | -12.30 |
| P52616 FLJB_SALTY Phase 2 flagellin                                       | 17 |                    | YFVTIGGFTGADAAK                               | 234 | 15 | 6  | 44.38  | b4°b4b7b10y11y12                                                                  | 1517.74 | 47.884  | 2456   | 2 | 759.37  | -15.60 |
| P52616 FLJB_SALTY Phase 2 flagellin                                       | 18 |                    | AATGGTNGTASVTGGAVKFDAD<br>NNK                 | 209 | 25 | 7  | 23.73  | b11b20b24y4*y4y13°y13                                                             | 2324.11 | 96.597  | 210318 | 2 | 1162.56 | -2.73  |
| P52616 FLJB_SALTY Phase 2 flagellin                                       | 19 |                    | AYANNGTTLDVSGLDAAIKAAT<br>GGTNGTASVTGGAVK     | 189 | 38 | 3  | 10.89  | b11y19y33                                                                         | 3509.76 | 107.344 | 33724  | 4 | 878.19  | 5.70   |
| P52616 FLJB_SALTY Phase 2 flagellin                                       | 20 |                    | TEVVTIDGKTYNASK                               | 381 | 15 | 4  | 32.78  | b6b7y5y8                                                                          | 1625.83 | 70.194  | 9255   | 2 | 813.42  | -6.16  |
| P52616 FLJB_SALTY Phase 2 flagellin                                       | 21 |                    | AAGHDFKAQPELAEAAAK                            | 396 | 18 | 3  | 16.15  | b4y7y11                                                                           | 1824.95 | 48.643  | 6752   | 3 | 608.99  | 14.05  |
| P52616 FLJB_SALTY Phase 2 flagellin                                       | 22 |                    | VLAQDNTLTIQVGANDGETIDIDL<br>KQINSQTLGLDSLNVQK | 136 | 41 | 4  | 25.55  | b5b7b15b16                                                                        | 4395.23 | 113.177 | 4298   | 3 | 1465.75 | -13.11 |
| P52616 FLJB_SALTY Phase 2 flagellin                                       | 23 |                    | AGDKYYAADYDEATGAIK                            | 337 | 18 | 7  | 68.59  | b3b5°b5b6b7b8b9                                                                   | 1921.88 | 119.177 | 3013   | 2 | 961.44  | -3.18  |
| P52616 FLJB_SALTY Phase 2 flagellin                                       | 24 |                    | FDADNNKYFVTIGGFTGADAAK                        | 227 | 22 | 3  | 13.9   | b13y6y8                                                                           | 2322.13 | 80.515  | 2019   | 3 | 774.71  | 11.04  |
| P52616 FLJB_SALTY Phase 2 flagellin                                       | 25 |                    | TAANQLGGVDGKTEVVTIDGK                         | 369 | 21 | 3  | 14.36  | b13y3y14                                                                          | 2073.08 | 84.406  | 1552   | 3 | 691.70  | -2.24  |
| P52616 FLJB_SALTY Phase 2 flagellin                                       | 26 | Phosphoryl STY(11) | NALIAGGV DATDANGAELVK                         | 299 | 20 | 6  | 29.14  | b5b9°b9y6y9y15                                                                    | 1978.92 | 78.926  | 2915   | 2 | 989.96  | -8.82  |
| P52616 FLJB_SALTY Phase 2 flagellin                                       | 27 | Phosphoryl STY(6)  | QINSQTLGLDSLNVQK                              | 161 | 16 | 5  | 25.19  | b5°b5b9_H3PO4<br>b9y9y12_H3PO4 y12                                                | 1837.88 | 71.303  | 1830   | 3 | 613.30  | -11.29 |
| P52616 FLJB_SALTY Phase 2 flagellin                                       | 28 | Phosphoryl STY(11) | FNSAITNLGNTVNNLSEAR                           | 443 | 19 | 5  | 32.44  | b3_H3PO4<br>b3°b3b4b10b12_H3PO4<br>b12                                            | 2114.98 | 59.685  | 1643   | 3 | 705.67  | 2.31   |
| P0A283 PTGA_SALTY Glucose-ecific<br>phohotransferase enzyme IIA component | 1  |                    | STLTPVVISNMDEIKELIK                           | 133 | 19 | 25 | 159.48 | b1b2°b2b3°b3b4°b4b5b13*<br>b13b19y3y4°y4y6y9y11°y1<br>1*y11y12y13y15y16y17y1<br>9 | 2130.16 | 92.210  | 301070 | 3 | 710.72  | -7.68  |
| P0A283 PTGA_SALTY Glucose-ecific<br>phohotransferase enzyme IIA component | 2  |                    | MVAPVDGTIGK                                   | 59  | 11 | 17 | 126.74 | b2b3b4b6°b6y2y3y5°y5y6y<br>7y8°y8y9°y9y10y11                                      | 1087.57 | 46.003  | 189762 | 2 | 544.29  | -11.67 |
| P0A283 PTGA_SALTY Glucose-ecific<br>phohotransferase enzyme IIA component | 3  |                    | VGDPVIEFDLPLEEK                               | 115 | 16 | 20 | 189.28 | b3b4b5°b5b6b7°b7b8°b8b1<br>0b12b15y3°y3y6y9y10y11y<br>13y16                       | 1812.97 | 99.363  | 133814 | 2 | 906.99  | 2.56   |
| P0A283 PTGA_SALTY Glucose-ecific<br>phohotransferase enzyme IIA component | 4  |                    | LSGSVTVGETPVIR                                | 152 | 14 | 7  | 48.11  | b7b10y1y7y8y9y14                                                                  | 1414.78 | 55.421  | 62144  | 2 | 707.90  | -4.83  |
| P0A283 PTGA_SALTY Glucose-ecific<br>phohotransferase enzyme IIA component | 5  |                    | STLTPVVISNMDEIK                               | 133 | 15 | 5  | 24.81  | b1b4y2y11y12                                                                      | 1646.87 | 72.841  | 19490  | 2 | 823.94  | 0.96   |
| P0A283 PTGA_SALTY Glucose-ecific<br>phohotransferase enzyme IIA component | 6  |                    | DTGTIEIVAPLSGEIVNIEDVPDVV<br>FAEK             | 16  | 29 | 4  | 15.1   | b4b8y4y8                                                                          | 3069.61 | 111.136 | 11813  | 3 | 1023.87 | 7.24   |
| P0A283 PTGA_SALTY Glucose-ecific<br>phohotransferase enzyme IIA component | 7  |                    | IVGDGIAIKPTGNK                                | 45  | 14 | 19 | 129.12 | b5°b5y3y4°y4y5°y5°y5y6y<br>7y8°y8*y8y10y12°y12*y12<br>y13°y13                     | 1382.77 | 43.334  | 175609 | 3 | 461.60  | -20.48 |
| P0A283 PTGA_SALTY Glucose-ecific<br>phohotransferase enzyme IIA component | 8  |                    | IAEEGQR                                       | 106 | 7  | 5  | 41.34  | b3°b3b5y6°y6                                                                      | 802.40  | 36.855  | 3710   | 2 | 401.70  | -8.75  |
| P0A283 PTGA_SALTY Glucose-ecific<br>phohotransferase enzyme IIA component | 9  |                    | VKVGDPVIEFDLPLEEK                             | 113 | 18 | 19 | 170.79 | b5°b5b6b7b8b9b11b12y3°<br>y3y4°y4y6y7y8°y8y9y10y1<br>3                            | 2040.10 | 94.818  | 127137 | 3 | 680.71  | -10.83 |

|                                                                        |    |  |                                   |     |    |    |        |                                                                     |         |         |        |   |         |        |
|------------------------------------------------------------------------|----|--|-----------------------------------|-----|----|----|--------|---------------------------------------------------------------------|---------|---------|--------|---|---------|--------|
| P0A283 PTGA_SALTY Glucose-ecific phohotransferase enzyme IIA component | 10 |  | PVDGTIGK                          | 62  | 8  | 4  | 48.59  | b3b4b5b7                                                            | 786.43  | 46.005  | 3838   | 1 | 786.43  | -5.59  |
| P0A283 PTGA_SALTY Glucose-ecific phohotransferase enzyme IIA component | 11 |  | STLTPVVISNMDEIKELIK               | 133 | 19 | 0  | 5.28   |                                                                     | 2112.15 | 92.202  | 3447   | 3 | 704.72  | -5.43  |
| P0A1E3 CYSK_SALTY Cysteine synthase A                                  | 1  |  | LTLTMPETMSIER                     | 87  | 13 | 18 | 108.53 | b2°b2b5°b5b12y1y2°y2y4°y4y6y7y8y9°y9y10y11y13                       | 1521.77 | 73.764  | 139645 | 2 | 761.39  | 0.80   |
| P0A1E3 CYSK_SALTY Cysteine synthase A                                  | 2  |  | YLLLQQFSNPANPEIHEK                | 137 | 18 | 16 | 150.42 | b2b3b4y3y4y6y7y9y10°y10y11y12y15°y15y16y18                          | 2141.08 | 73.628  | 125431 | 3 | 714.36  | -10.83 |
| P0A1E3 CYSK_SALTY Cysteine synthase A                                  | 3  |  | IQGIGAGFIPGNLDLK                  | 226 | 16 | 19 | 132.16 | b2°b2b3b4b6b8b9b14y2y3y7°y7°y7y8y10y12y14°y14y16                    | 1612.91 | 83.180  | 118289 | 2 | 806.96  | 2.42   |
| P0A1E3 CYSK_SALTY Cysteine synthase A                                  | 4  |  | YLSTALFADLFTEKELQQ                | 305 | 18 | 24 | 149.48 | b2b5b11b13°b13b15b16y2°y2y3°y3y4°y4y5y7°y7y9y10°y10y11y12°y12y13y18 | 2117.10 | 101.945 | 93842  | 2 | 1059.05 | 7.50   |
| P0A1E3 CYSK_SALTY Cysteine synthase A                                  | 5  |  | GVLKPGVELVEPTSGNTGIALAYV AAAR     | 56  | 28 | 16 | 136.68 | b2b3b11y3y4y5y6y7y8y9y11y13y14y17y18y28                             | 2753.52 | 81.107  | 86847  | 3 | 918.51  | -1.06  |
| P0A1E3 CYSK_SALTY Cysteine synthase A                                  | 6  |  | NIVVILPSSGER                      | 293 | 12 | 12 | 113.59 | b2b3°b3b4b5b6y6y7y8y9y10y12                                         | 1283.73 | 63.672  | 73305  | 2 | 642.37  | -3.42  |
| P0A1E3 CYSK_SALTY Cysteine synthase A                                  | 7  |  | IYEDNSLTIGHTPLVR                  | 3   | 16 | 11 | 81.06  | b2y2y4y7y8y9y11y14°y14y15y16                                        | 1827.94 | 61.266  | 63760  | 3 | 609.98  | -12.15 |
| P0A1E3 CYSK_SALTY Cysteine synthase A                                  | 8  |  | ALGANLVLTEGAK                     | 105 | 13 | 12 | 63.97  | b2b5°b5b12y1y2y5y7y9°y9y11y13                                       | 1256.72 | 61.021  | 28361  | 2 | 628.87  | 3.01   |
| P0A1E3 CYSK_SALTY Cysteine synthase A                                  | 9  |  | VVGITNEEAISTAR                    | 246 | 14 | 12 | 108.33 | b3b4y2y4y5y6y7y9°y9y10y12y14                                        | 1459.77 | 49.368  | 22800  | 2 | 730.39  | -2.26  |
| P0A1E3 CYSK_SALTY Cysteine synthase A                                  | 10 |  | YLSTALFADLFTEK                    | 305 | 14 | 12 | 76.62  | b2b5°b5b7°b7y9y10°y10y11y12y13y14                                   | 1618.85 | 102.832 | 22456  | 2 | 809.93  | 5.66   |
| P0A1E3 CYSK_SALTY Cysteine synthase A                                  | 11 |  | IGANMIWDAEK                       | 44  | 11 | 8  | 37.8   | b1b5y1y2°y2y5y6y10                                                  | 1247.61 | 65.075  | 19877  | 2 | 624.31  | -0.20  |
| P0A1E3 CYSK_SALTY Cysteine synthase A                                  | 12 |  | IGANMIWDAEKR                      | 44  | 12 | 5  | 35.29  | b6y7y8y10y12                                                        | 1403.69 | 62.942  | 15477  | 2 | 702.35  | -11.04 |
| P0A1E3 CYSK_SALTY Cysteine synthase A                                  | 13 |  | NPSFSVK                           | 35  | 7  | 5  | 41.34  | b3°b3°b3y3y6                                                        | 778.40  | 36.871  | 42567  | 2 | 389.70  | -16.62 |
| P0A1E3 CYSK_SALTY Cysteine synthase A                                  | 14 |  | TDLITVAVEPTDSPVIAQALAGEEI KPGPHK  | 195 | 31 | 4  | 22.35  | b3b4b10y5                                                           | 3196.69 | 84.686  | 38373  | 4 | 799.93  | -6.87  |
| P0A1E3 CYSK_SALTY Cysteine synthase A                                  | 15 |  | AEEIVASDPQK                       | 126 | 11 | 7  | 89.17  | b4y4y5y6y7y8y9                                                      | 1186.59 | 31.369  | 3017   | 1 | 1186.59 | -2.47  |
| P0A1E3 CYSK_SALTY Cysteine synthase A                                  | 16 |  | GKTDLITVAVEPTDSPVIAQALAGEEIKPGPHK | 193 | 33 | 14 | 87.37  | b6b7°b7b9b11y3y4y5y10y11y13y15y18y22                                | 3381.80 | 79.364  | 122982 | 4 | 846.21  | -7.72  |
| P0A1E3 CYSK_SALTY Cysteine synthase A                                  | 17 |  | LIDKVVGITNEEAISTAR                | 242 | 18 | 11 | 82.22  | b6b8y4y6y7°y7y8y10y12°y12y13                                        | 1929.05 | 59.197  | 60641  | 3 | 643.69  | -8.92  |
| P0A1E3 CYSK_SALTY Cysteine synthase A                                  | 18 |  | SKIYEDNSLTIGHTPLVR                | 1   | 18 | 3  | 23.55  | b9y4y5                                                              | 2043.08 | 57.405  | 44251  | 3 | 681.70  | -5.38  |
| P0A1E3 CYSK_SALTY Cysteine synthase A                                  | 19 |  | AEEIVASDPQKYLLLQQFSNPANPEIHEK     | 126 | 29 | 7  | 48.04  | b6y3y6y8y9y10y12                                                    | 3308.66 | 76.887  | 26235  | 4 | 827.92  | -6.05  |
| P0A1E3 CYSK_SALTY Cysteine synthase A                                  | 20 |  | GAIQKAEEIVASDPQK                  | 121 | 16 | 5  | 36.01  | b6b9y3y7y10                                                         | 1683.89 | 55.165  | 19749  | 2 | 842.45  | 1.23   |
| P0A1E3 CYSK_SALTY Cysteine synthase A                                  | 21 |  | VVGITNEEAISTARR                   | 246 | 15 | 3  | 18.79  | b7y3y9                                                              | 1615.87 | 54.595  | 14879  | 3 | 539.29  | -5.89  |
| P0A1E3 CYSK_SALTY Cysteine synthase A                                  | 22 |  | LQEDESFTNKNIVVILPSSGER            | 283 | 22 | 6  | 36.4   | b4b10y3y5y6y8                                                       | 2475.26 | 69.304  | 10635  | 3 | 825.76  | -4.04  |
| P0A1E3 CYSK_SALTY Cysteine synthase A                                  | 23 |  | IGANMIWDAEKR                      | 44  | 12 | 3  | 26.99  | b10y5y6                                                             | 1403.70 | 66.359  | 9988   | 2 | 702.36  | -4.44  |

|                                                    |    |                      |                                         |     |    |    |        |                                                                                                                                            |         |         |        |   |         |        |
|----------------------------------------------------|----|----------------------|-----------------------------------------|-----|----|----|--------|--------------------------------------------------------------------------------------------------------------------------------------------|---------|---------|--------|---|---------|--------|
| [P0A1E3]CYSK_SALTY Cysteine synthase A             | 24 |                      | GYKLTLTMPETMSIER                        | 84  | 16 | 3  | 17.79  | b14y6y9                                                                                                                                    | 1869.97 | 97.046  | 6624   | 3 | 623.99  | 13.58  |
| [P0A1E3]CYSK_SALTY Cysteine synthase A             | 25 |                      | LMEEEGILAGISSGAAVAALKLQ EDESFTNK        | 261 | 32 | 8  | 42.5   | b4b8b10b11b12y10y12°y12                                                                                                                    | 3292.61 | 106.014 | 1928   | 3 | 1098.21 | -14.46 |
| [P0A1E3]CYSK_SALTY Cysteine synthase A             | 26 | Phosphoryl STY(5)    | VVGITNEEAISTARR                         | 246 | 15 | 3  | 26.87  | b3b5b10                                                                                                                                    | 1695.83 | 52.282  | 23104  | 3 | 565.95  | -1.30  |
| [P0A1E3]CYSK_SALTY Cysteine synthase A             | 27 | Phosphoryl STY(12)   | IYEDNSLTIGHTPLVR                        | 3   | 16 | 5  | 28.6   | b7b11b13_HPO3 b13y13*y13                                                                                                                   | 1907.93 | 91.437  | 1871   | 2 | 954.47  | 6.46   |
| [P0A1E3]CYSK_SALTY Cysteine synthase A             | 28 | Oxidation+M(9)       | LTLTMPETMSIERR                          | 87  | 14 | 3  | 25.4   | b5y10y11                                                                                                                                   | 1693.88 | 90.840  | 1879   | 2 | 847.44  | 10.38  |
| [P17215]LIVJ_SALTY Leu/Ile/Val/Thr-binding protein | 1  |                      | TQFMGPEGVANVSLSNIAGESAE GLLVTKPK        | 240 | 31 | 25 | 151.72 | b2b3b4b5°b5°b5b10*b10b12b15y2y4y5y6y8y13y14y19°y19y22y26y27y28y29y31                                                                       | 3144.63 | 88.284  | 270142 | 3 | 1048.88 | 2.95   |
| [P17215]LIVJ_SALTY Leu/Ile/Val/Thr-binding protein | 2  | Carbamidomethyl+C(7) | YVIGHLCSSSTQPASDIYEDEGILM ITPAATAPELTAR | 92  | 38 | 24 | 172.9  | b2b5b7b10b11°b11b12°b12b14b23b24b25b26b27y4y6y7y8y10y11y12y13y15y38                                                                        | 4078.01 | 89.169  | 240855 | 3 | 1360.01 | 7.30   |
| [P17215]LIVJ_SALTY Leu/Ile/Val/Thr-binding protein | 3  |                      | ENIDFVYYGGYHPEMGQILR                    | 212 | 20 | 17 | 143.21 | b2°b2b6°b6°b6y3y5y6y8y10y12y13y14y15y16y17y20                                                                                              | 2401.12 | 79.702  | 140407 | 3 | 801.04  | -3.97  |
| [P17215]LIVJ_SALTY Leu/Ile/Val/Thr-binding protein | 4  |                      | TTGLDSQDGPTAAK                          | 137 | 14 | 30 | 233.36 | b1°b1b2°b2b3°b3b5°b5b7b8b10b11b12°b12b13°b13y1y3y5y6y8y9y10°y10°y10y11y12*y12y13y14                                                        | 1361.65 | 29.253  | 137065 | 2 | 681.33  | -3.14  |
| [P17215]LIVJ_SALTY Leu/Ile/Val/Thr-binding protein | 5  |                      | VAVVGAMSGPVAQYGDQEFTGA EQAIADINAK       | 25  | 32 | 20 | 129.73 | b3b6b9b11b16b26y2y3*y3y5y6°y6y7y8y11y12°y12y13y14y32                                                                                       | 3207.59 | 89.802  | 136286 | 3 | 1069.87 | 7.31   |
| [P17215]LIVJ_SALTY Leu/Ile/Val/Thr-binding protein | 6  |                      | QQYGEGLAR                               | 168 | 9  | 14 | 63.12  | b2°b2b3°b3b9y1y2y4y5°y5y6°y6y7y9                                                                                                           | 1021.50 | 32.512  | 116187 | 2 | 511.25  | -8.90  |
| [P17215]LIVJ_SALTY Leu/Ile/Val/Thr-binding protein | 7  |                      | GGVNVVFFDGITAGEKDFSTLVAR                | 185 | 24 | 18 | 147    | b4°b4b5°b5b6b7b14b15y2y3y4y7y8y12y13y18y19y24                                                                                              | 2499.28 | 101.354 | 101634 | 3 | 833.76  | -3.81  |
| [P17215]LIVJ_SALTY Leu/Ile/Val/Thr-binding protein | 8  |                      | IAIHDK                                  | 161 | 7  | 6  | 41.34  | y2y3°y3y5y6y7                                                                                                                              | 809.48  | 32.088  | 27832  | 2 | 405.24  | -11.46 |
| [P17215]LIVJ_SALTY Leu/Ile/Val/Thr-binding protein | 9  |                      | GATVDTVMGPLSWDEK                        | 326 | 16 | 7  | 53.06  | b3b4b8b12°b12y10y11                                                                                                                        | 1705.82 | 78.036  | 16357  | 2 | 853.42  | 7.51   |
| [P17215]LIVJ_SALTY Leu/Ile/Val/Thr-binding protein | 10 |                      | GFEFGVFDWHANGTATDAK                     | 346 | 19 | 5  | 47.35  | y3y5y7y8y9                                                                                                                                 | 2069.92 | 89.101  | 3663   | 3 | 690.64  | -8.26  |
| [P17215]LIVJ_SALTY Leu/Ile/Val/Thr-binding protein | 11 |                      | NYDQVPANKPIVDAIK                        | 271 | 16 | 12 | 96.38  | b3°b3b5b8b9y3y4y5y7y10y11°y11                                                                                                              | 1784.92 | 53.416  | 260852 | 3 | 595.65  | -16.55 |
| [P17215]LIVJ_SALTY Leu/Ile/Val/Thr-binding protein | 12 | Carbamidomethyl+C(6) | TLLAGCIALSLSHMAFADDIK                   | 4   | 21 | 4  | 14.36  | b8°b8y13y18                                                                                                                                | 2247.14 | 67.278  | 6736   | 3 | 749.72  | -3.15  |
| [P17215]LIVJ_SALTY Leu/Ile/Val/Thr-binding protein | 13 |                      | GGVNVVFFDGITAGEK                        | 185 | 16 | 3  | 25.49  | b4b12b14                                                                                                                                   | 1609.79 | 68.858  | 1973   | 3 | 537.27  | -19.87 |
| [P17215]LIVJ_SALTY Leu/Ile/Val/Thr-binding protein | 14 |                      | KQDPSGAFVWTTYAALQSLQAGL NHSDDPAEIAK     | 289 | 34 | 45 | 340.15 | b3°b3b6b7°b7°b7b8°b8b9b10b11°b11°b11b12°b12b13°b13b14b15y3y6y9°y9y10y11y12y13°y13°y13y14°y14y15°y15°y15y16y17y18*y18y19y20°y20y21y22y24y25 | 3629.77 | 101.997 | 352014 | 4 | 908.20  | -4.98  |
| [P17215]LIVJ_SALTY Leu/Ile/Val/Thr-binding protein | 15 |                      | GDLKGFEFGVFDWHANGTATDAK                 | 342 | 23 | 3  | 22.51  | b10b11y3                                                                                                                                   | 2483.16 | 81.934  | 3615   | 3 | 828.39  | -1.28  |
| [P17215]LIVJ_SALTY Leu/Ile/Val/Thr-binding protein | 16 |                      | YLKGATVDTVMGPLSWDEK                     | 323 | 19 | 4  | 15.48  | b13°b13y7y16                                                                                                                               | 2110.04 | 96.533  | 2314   | 3 | 704.02  | -4.98  |

|                                                            |    |                                       |                                            |     |    |    |        |                                                                        |         |        |        |   |         |        |
|------------------------------------------------------------|----|---------------------------------------|--------------------------------------------|-----|----|----|--------|------------------------------------------------------------------------|---------|--------|--------|---|---------|--------|
| P17215 LIVJ_SALTY Leu/Ile/Val/Thr-binding protein          | 17 | Carbamidomethyl+C(6); Oxidation+M(14) | TLLAGCIALSLSHMAFADDIK                      | 4   | 21 | 3  | 14.36  | b8y7y18                                                                | 2263.15 | 59.069 | 3006   | 3 | 755.06  | 2.16   |
| P17215 LIVJ_SALTY Leu/Ile/Val/Thr-binding protein          | 18 |                                       | QQYGEGLAR                                  | 168 | 9  | 1  | 9.02   | y3                                                                     | 1003.49 | 32.533 | 11576  | 2 | 502.25  | -5.23  |
| P06202 OPPA_SALTY Periplasmic oligopeptide-binding protein | 1  |                                       | LADPNTASPYASYLQYGHIANIDD<br>IIAGKKPATDLGVK | 125 | 38 | 27 | 144.88 | b2b3b5b6°b6b8°b8°b8b9°b9b10°b10b20y1y2y3y4y8y9y11y12y22y23y27y30y31y38 | 4001.01 | 82.892 | 229426 | 5 | 801.01  | -13.42 |
| P06202 OPPA_SALTY Periplasmic oligopeptide-binding protein | 2  |                                       | AEQQLDKDSAIVPVYYVYNAR                      | 494 | 21 | 13 | 84.92  | b5b7b8b11b12°b12y4y5y7°y7y9y10y21                                      | 2442.21 | 72.626 | 131256 | 3 | 814.74  | -7.90  |
| P06202 OPPA_SALTY Periplasmic oligopeptide-binding protein | 3  | Carbamidomethyl+C(4)                  | AGWCADYNEPTSLNTMLSDSSN<br>NTAHYK           | 439 | 29 | 11 | 57.82  | b4y2y10°y10y11y13y14y15y22y24y29                                       | 3294.43 | 89.896 | 122771 | 3 | 1098.81 | 5.63   |
| P06202 OPPA_SALTY Periplasmic oligopeptide-binding protein | 4  |                                       | WSDGTPVTAHDFVYSWQR                         | 107 | 18 | 20 | 180.76 | b2°b2y3°y3y4y5°y5y6y7y8°y8y9y10y11y12y13y16y17y18°y18                  | 2151.97 | 71.751 | 105151 | 3 | 718.00  | -7.49  |
| P06202 OPPA_SALTY Periplasmic oligopeptide-binding protein | 5  |                                       | LVEPEWFK                                   | 352 | 8  | 10 | 82.29  | b2b3b7y2y3y5y6°y6y7y8                                                  | 1047.54 | 70.614 | 94532  | 2 | 524.28  | -7.57  |
| P06202 OPPA_SALTY Periplasmic oligopeptide-binding protein | 6  |                                       | ALDDHTFEVTLSEPVPYFYK                       | 163 | 20 | 16 | 105.47 | b5b6b7b9b10°b10b13°b13y2y4y5y7y8y9°y9y20                               | 2371.14 | 85.717 | 92018  | 3 | 791.05  | -3.71  |
| P06202 OPPA_SALTY Periplasmic oligopeptide-binding protein | 7  |                                       | TVINQVTYLPISSEVTDVNR                       | 241 | 20 | 27 | 214.42 | b1b2b5b8°b8b9b10b12y1y2y3°y3y4y5y6y7y8°y8y9y11°y11y12y13y14y15y18y20   | 2248.20 | 76.953 | 83840  | 2 | 1124.60 | 8.25   |
| P06202 OPPA_SALTY Periplasmic oligopeptide-binding protein | 8  |                                       | LVKPWVGGYTGKDPLDNIYVK                      | 515 | 21 | 8  | 54.23  | b2y1y3y5y6y8y9y18                                                      | 2362.28 | 72.337 | 72429  | 3 | 788.10  | -0.62  |
| P06202 OPPA_SALTY Periplasmic oligopeptide-binding protein | 9  |                                       | SGEIDMTYNNMPIELFQK                         | 263 | 18 | 11 | 42.31  | b2b3b13y2y3y5y10y11°y11°y11y18                                         | 2130.01 | 86.450 | 69489  | 2 | 1065.51 | 9.17   |
| P06202 OPPA_SALTY Periplasmic oligopeptide-binding protein | 10 |                                       | NQGDLPAYSYPYTDGAK                          | 333 | 19 | 11 | 49.42  | b1°b1b4y2y8y9y11y12°y12y14y19                                          | 2057.96 | 59.042 | 60562  | 2 | 1029.48 | 7.83   |
| P06202 OPPA_SALTY Periplasmic oligopeptide-binding protein | 11 |                                       | LADPNTASPYASYLQYGHIANIDD<br>IIAGK          | 125 | 29 | 12 | 47.75  | b3b7b8°b8y1y2y3y4y15y17y22y29                                          | 3091.56 | 88.176 | 60260  | 3 | 1031.19 | 6.08   |
| P06202 OPPA_SALTY Periplasmic oligopeptide-binding protein | 12 |                                       | LLAEAGFTADKPLTFDLLYNTSDL<br>HKK            | 372 | 27 | 7  | 37.17  | b2b4y1y8y9y10y12                                                       | 3021.57 | 83.255 | 48467  | 4 | 756.15  | -6.79  |
| P06202 OPPA_SALTY Periplasmic oligopeptide-binding protein | 13 |                                       | NLGVNVNLENQEWK                             | 410 | 14 | 12 | 82.37  | b6b7b9y7°y7y8°y8y10y11y12°y12y14                                       | 1656.84 | 66.346 | 45479  | 2 | 828.92  | 2.21   |
| P06202 OPPA_SALTY Periplasmic oligopeptide-binding protein | 14 |                                       | HQGTFDVAR                                  | 430 | 9  | 9  | 66.13  | b2b6y2y3y4y7y8°y8y9                                                    | 1030.50 | 30.778 | 44440  | 2 | 515.75  | -6.52  |
| P06202 OPPA_SALTY Periplasmic oligopeptide-binding protein | 15 |                                       | DLFEGLLISDVEGHPSPGVAEK                     | 67  | 22 | 6  | 21.64  | b2b12y8y11y15y22                                                       | 2309.16 | 89.001 | 25475  | 3 | 770.39  | -2.43  |
| P06202 OPPA_SALTY Periplasmic oligopeptide-binding protein | 16 |                                       | LIADTLK                                    | 474 | 7  | 6  | 54.86  | y2y3y4y5y6y7                                                           | 773.47  | 43.082 | 21113  | 2 | 387.24  | -13.41 |
| P06202 OPPA_SALTY Periplasmic oligopeptide-binding protein | 17 | Carbamidomethyl+C(6)                  | VDPYLCTYYYEINNQK                           | 291 | 16 | 5  | 29.27  | b1b5y6y7y9                                                             | 2082.97 | 70.470 | 10632  | 2 | 1041.99 | 8.56   |

|                                                            |    |                       |                                     |     |    |    |        |                                                  |         |         |        |   |         |        |
|------------------------------------------------------------|----|-----------------------|-------------------------------------|-----|----|----|--------|--------------------------------------------------|---------|---------|--------|---|---------|--------|
| P06202 OPPA_SALTY Periplasmic oligopeptide-binding protein | 18 |                       | WTQPANIVTNGAYK                      | 204 | 14 | 5  | 25.4   | b1b13*b13y5y6                                    | 1562.81 | 82.139  | 2896   | 2 | 781.91  | 6.87   |
| P06202 OPPA_SALTY Periplasmic oligopeptide-binding protein | 19 |                       | IEGVPESNVSR                         | 56  | 11 | 3  | 25.06  | b3y5y7                                           | 1186.62 | 72.276  | 22227  | 2 | 593.81  | 11.52  |
| P06202 OPPA_SALTY Periplasmic oligopeptide-binding protein | 20 |                       | DIIVNK                              | 325 | 6  | 1  | 13.9   | y3                                               | 701.41  | 55.080  | 12718  | 1 | 701.41  | -10.27 |
| P06202 OPPA_SALTY Periplasmic oligopeptide-binding protein | 21 |                       | SLIAAGILTALIAASAATAADVPAG<br>VQLADK | 7   | 31 | 4  | 22.35  | b15b18b19y16                                     | 2863.59 | 136.705 | 2248   | 3 | 955.20  | -6.82  |
| P06202 OPPA_SALTY Periplasmic oligopeptide-binding protein | 22 |                       | DSAIVPVYYYVNAR                      | 501 | 14 | 7  | 52.09  | b5b7b8y5y7y8*y8                                  | 1629.84 | 106.021 | 1500   | 2 | 815.42  | 6.89   |
| P06202 OPPA_SALTY Periplasmic oligopeptide-binding protein | 23 |                       | FGDKWTQPANIVTNGAYK                  | 200 | 18 | 16 | 92.36  | b5°b5b7°b7b8b10°b10°b10°y4y5y6y7y9*y9y11*y11     | 2010.00 | 62.284  | 87754  | 3 | 670.67  | -5.71  |
| P06202 OPPA_SALTY Periplasmic oligopeptide-binding protein | 24 |                       | NNGSEVQSLDPHKIEGVPESNVSR            | 43  | 24 | 10 | 73.09  | b4b5b9b10°b10b11y5y11y14y22                      | 2592.23 | 50.963  | 83868  | 4 | 648.81  | -12.90 |
| P06202 OPPA_SALTY Periplasmic oligopeptide-binding protein | 25 | Carbamidomethyl+C(13) | EIPNEVRVDPYLCTYYYYEINNQK            | 284 | 23 | 8  | 51.5   | b7b9b15y4y8y9y11y21                              | 2920.39 | 75.858  | 45948  | 3 | 974.14  | 3.01   |
| P06202 OPPA_SALTY Periplasmic oligopeptide-binding protein | 26 |                       | NPQYWDNAKTVINQVTYLPISSEV<br>TDVNR   | 232 | 29 | 4  | 11.8   | b12b22°b22y8                                     | 3364.70 | 101.329 | 28042  | 3 | 1122.24 | 6.75   |
| P06202 OPPA_SALTY Periplasmic oligopeptide-binding protein | 27 |                       | TVINQVTYLPISSEVTDVNRYSR             | 241 | 22 | 3  | 20.41  | y13y16y19                                        | 2567.35 | 76.760  | 20320  | 3 | 856.45  | 1.24   |
| P06202 OPPA_SALTY Periplasmic oligopeptide-binding protein | 28 | Carbamidomethyl+C(6)  | VDPYLCTYYYYEINNQKAPFNDVR            | 291 | 23 | 4  | 13.48  | b5°b5y5y13                                       | 2882.35 | 76.040  | 17359  | 3 | 961.45  | -0.08  |
| P06202 OPPA_SALTY Periplasmic oligopeptide-binding protein | 29 |                       | LKNWVVNER                           | 218 | 9  | 4  | 31.3   | b6y6y7°y7                                        | 1157.63 | 43.408  | 11790  | 2 | 579.32  | -7.59  |
| P06202 OPPA_SALTY Periplasmic oligopeptide-binding protein | 30 |                       | DLFEGLLISDVEGHSPGVAEKWE<br>NK       | 67  | 26 | 7  | 49.82  | b3b4y6y8y9y11y25                                 | 2866.44 | 99.383  | 8029   | 3 | 956.15  | 5.79   |
| P06202 OPPA_SALTY Periplasmic oligopeptide-binding protein | 31 |                       | LVEPEWFKWSQQK                       | 352 | 13 | 7  | 47.43  | b7b10b11°b11y4y5°y5                              | 1704.86 | 72.341  | 2160   | 2 | 852.93  | -10.53 |
| P06202 OPPA_SALTY Periplasmic oligopeptide-binding protein | 32 | Phosphoryl STY(21)    | LLAEAGFTADKPLTFDLLYNTSDL<br>HKK     | 372 | 27 | 4  | 23.19  | b11y3y6y7                                        | 3101.57 | 136.539 | 2971   | 2 | 1551.29 | 5.04   |
| P02910 HISJ_SALTY Histidine-binding periplasmic protein    | 1  |                       | VGVLQGTQTETFGNEHWAPK                | 135 | 20 | 16 | 135.73 | b1b2b4b5y3y4y5y6y8y9y10°y10y11y12y19y20          | 2199.07 | 63.040  | 148780 | 3 | 733.70  | -4.77  |
| P02910 HISJ_SALTY Histidine-binding periplasmic protein    | 2  |                       | IGTDPTYAPFESK                       | 29  | 13 | 16 | 129.26 | b2b4y3°y3y5°y5y6°y6y7y8y9y10y11°y11y12y13        | 1425.69 | 55.303  | 127569 | 2 | 713.35  | -1.71  |
| P02910 HISJ_SALTY Histidine-binding periplasmic protein    | 3  |                       | NSDIQPTVASLK                        | 120 | 12 | 19 | 131.89 | b2°b2°b2b3°b3°b3b4b5b6y3y4y5y8°y8°y8y9y10*y10y12 | 1272.67 | 47.956  | 104647 | 2 | 636.84  | -6.81  |
| P02910 HISJ_SALTY Histidine-binding periplasmic protein    | 4  | Carbamidomethyl+C(5)  | INTQCTFVENPLDALIPSLK                | 62  | 20 | 18 | 122.31 | b3°b3b10b15b16°b16y1y2y3y4°y4y5y6y7y9y10y11y20   | 2273.21 | 103.489 | 87660  | 2 | 1137.11 | 10.10  |
| P02910 HISJ_SALTY Histidine-binding periplasmic protein    | 5  |                       | NAQGELVGFDIDLAK                     | 42  | 15 | 8  | 26.76  | b7°b7°b7b10y1y8y12y15                            | 1589.82 | 79.057  | 63362  | 2 | 795.42  | 4.22   |

|                                                              |    |                       |                                           |     |    |    |        |                                                            |         |         |       |   |         |        |
|--------------------------------------------------------------|----|-----------------------|-------------------------------------------|-----|----|----|--------|------------------------------------------------------------|---------|---------|-------|---|---------|--------|
| P02910 HISJ_SALTY Histidine-binding periplasmic protein      | 6  |                       | LFGVGTGMGLR                               | 211 | 11 | 6  | 28.07  | b2b3y2y9y10y11                                             | 1107.59 | 71.737  | 59594 | 2 | 554.30  | -9.59  |
| P02910 HISJ_SALTY Histidine-binding periplasmic protein      | 7  |                       | FGGPAVKDEK                                | 201 | 10 | 17 | 140.17 | b2b3b6b8°b8b9y1y2°y2y3y4°y4y5y7y8y9y10                     | 1047.54 | 26.139  | 41452 | 2 | 524.27  | -5.48  |
| P02910 HISJ_SALTY Histidine-binding periplasmic protein      | 8  |                       | IDAIMSSLSITEKR                            | 85  | 14 | 5  | 56.26  | b3b6b7b8b12                                                | 1563.83 | 98.796  | 23126 | 2 | 782.42  | -7.34  |
| P02910 HISJ_SALTY Histidine-binding periplasmic protein      | 9  | Carbamidomethyl+C(18) | NAQGELVGFDIDLAKELCK                       | 42  | 19 | 8  | 47.35  | b1b6b10b11b13°b13b14y19                                    | 2120.07 | 104.561 | 8489  | 2 | 1060.54 | 2.42   |
| P02910 HISJ_SALTY Histidine-binding periplasmic protein      | 10 |                       | GIEIVSYQGQDNIYSDLTAGR                     | 155 | 21 | 4  | 22.49  | b13y3y7y14                                                 | 2299.15 | 78.609  | 15862 | 2 | 1150.08 | 11.47  |
| P02910 HISJ_SALTY Histidine-binding periplasmic protein      | 11 |                       | AFAEMR                                    | 234 | 6  | 1  | 13.9   | y5                                                         | 724.34  | 35.473  | 3016  | 2 | 362.67  | -11.54 |
| P02910 HISJ_SALTY Histidine-binding periplasmic protein      | 12 |                       | IDAAFQDEVAASEGFLKQPVGK                    | 176 | 22 | 7  | 44.14  | b4b5b9b13y4y18y20                                          | 2320.17 | 77.915  | 67226 | 3 | 774.06  | -5.37  |
| P02910 HISJ_SALTY Histidine-binding periplasmic protein      | 13 | Carbamidomethyl+C(18) | NAQGELVGFDIDLAKELCK                       | 42  | 19 | 4  | 24.5   | b3y3y11y13                                                 | 2120.06 | 85.954  | 14914 | 3 | 707.36  | -3.92  |
| P02910 HISJ_SALTY Histidine-binding periplasmic protein      | 14 |                       | RVGVLQGTQTQETFGNEHWAPK                    | 134 | 21 | 5  | 39.7   | b4b5b6b17y10                                               | 2355.15 | 57.731  | 13996 | 4 | 589.54  | -14.51 |
| P02910 HISJ_SALTY Histidine-binding periplasmic protein      | 15 |                       | DEKLFGVGTGMGLR                            | 208 | 14 | 5  | 32.52  | b4°b4b7b13y10                                              | 1479.74 | 70.390  | 5156  | 2 | 740.38  | -11.96 |
| P02910 HISJ_SALTY Histidine-binding periplasmic protein      | 16 |                       | EALNKAFAMR                                | 229 | 11 | 6  | 54.34  | b9y6y8°y8y9y10                                             | 1279.63 | 80.594  | 3816  | 2 | 640.32  | -9.16  |
| P02910 HISJ_SALTY Histidine-binding periplasmic protein      | 17 | Oxidation+M(8)        | LFGVGTGMGLR                               | 211 | 11 | 3  | 28.07  | b7b8y9                                                     | 1123.59 | 42.048  | 6428  | 2 | 562.30  | -3.37  |
| P02910 HISJ_SALTY Histidine-binding periplasmic protein      | 18 |                       | GGPAVKDEK                                 | 202 | 9  | 5  | 52.98  | b3b4b5b7°b7                                                | 900.47  | 26.139  | 15248 | 2 | 450.74  | -6.98  |
| Q8ZQD4 LOLA_SALTY Outer-membrane lipoprotein carrier protein | 1  |                       | TLWFYNPFVEQATATWLK                        | 85  | 18 | 24 | 157.93 | b2b3°b3b4°b4b5°b5b6°b6°b6b8y1y2y3y4y5y6y7y9°y9y12y13y14y18 | 2215.14 | 115.603 | 41613 | 2 | 1108.07 | 6.72   |
| Q8ZQD4 LOLA_SALTY Outer-membrane lipoprotein carrier protein | 2  |                       | DATGNTPFMLIAR                             | 103 | 13 | 7  | 46.85  | b3y3y4y7y10y13*y13                                         | 1406.71 | 78.239  | 34494 | 2 | 703.86  | -1.91  |
| Q8ZQD4 LOLA_SALTY Outer-membrane lipoprotein carrier protein | 3  |                       | QFTINVGR                                  | 146 | 8  | 9  | 50.47  | b2°b2b7°b7y4*y4y5y6y8                                      | 934.50  | 53.163  | 33859 | 2 | 467.75  | -10.06 |
| Q8ZQD4 LOLA_SALTY Outer-membrane lipoprotein carrier protein | 4  |                       | VSSFHATFTQK                               | 33  | 11 | 6  | 25.06  | b5b10y1y9°y9y11                                            | 1252.61 | 40.496  | 21106 | 3 | 418.21  | -14.42 |
| Q8ZQD4 LOLA_SALTY Outer-membrane lipoprotein carrier protein | 5  |                       | VTDGSGAAVQEGQGDLWVK                       | 44  | 19 | 5  | 24.66  | b1y9y10y12y19                                              | 1916.95 | 56.976  | 18245 | 2 | 958.98  | 7.96   |
| Q8ZQD4 LOLA_SALTY Outer-membrane lipoprotein carrier protein | 6  |                       | RPNLFNWHMTQPDESILVSDGK                    | 63  | 22 | 9  | 61.65  | b8b9b11b13y2y4y5y6y11                                      | 2584.26 | 76.346  | 12174 | 3 | 862.09  | 1.04   |
| Q8ZQD4 LOLA_SALTY Outer-membrane lipoprotein carrier protein | 7  |                       | VTDGSGAAVQEGQGDLWVKRPNLFNWHMTQPDESILVSDGK | 44  | 41 | 6  | 15.7   | b8b10°b10b14y3y13                                          | 4482.19 | 92.601  | 2741  | 3 | 1494.74 | 3.38   |
| Q8ZQD4 LOLA_SALTY Outer-membrane lipoprotein carrier protein | 8  | Carbamidomethyl+C(5)  | MAIACALLSSVVASSVWADAASSLK                 | 3   | 25 | 3  | 23.27  | b8b9b12                                                    | 2508.32 | 74.092  | 4302  | 2 | 1254.67 | 15.87  |
| Q8ZQD4 LOLA_SALTY Outer-membrane lipoprotein carrier protein | 9  |                       | NQASDWQQYNIKQDGDNFVLTPK                   | 116 | 23 | 5  | 29.55  | y3y12°y12y20y21                                            | 2709.29 | 67.677  | 39712 | 3 | 903.77  | -1.17  |
| Q8ZQD4 LOLA_SALTY Outer-membrane lipoprotein carrier protein | 10 |                       | ASNGNLKQFTINVGR                           | 139 | 15 | 3  | 18.79  | b10y3y7                                                    | 1618.87 | 52.717  | 2736  | 2 | 809.94  | 4.52   |



|                                                              |    |                       |                                 |     |    |    |        |                                                                 |         |         |        |   |         |        |
|--------------------------------------------------------------|----|-----------------------|---------------------------------|-----|----|----|--------|-----------------------------------------------------------------|---------|---------|--------|---|---------|--------|
| Q8ZQD4 LOLA_SALTY Outer-membrane lipoprotein carrier protein | 11 |                       | SQQNGAVDPSKFTFTPPQGVTTIDDQR     | 176 | 26 | 5  | 23.16  | b3b4°b4b9°b9                                                    | 2833.40 | 86.583  | 1718   | 2 | 1417.20 | 8.19   |
| Q8ZQD4 LOLA_SALTY Outer-membrane lipoprotein carrier protein | 12 |                       | SAYQLKSQQNGAVDPSK               | 170 | 17 | 11 | 55.66  | b3b4°b4*b4b6°b6y3y6y7°y7y9                                      | 1820.94 | 38.338  | 1596   | 3 | 607.65  | 12.40  |
| Q8ZQD4 LOLA_SALTY Outer-membrane lipoprotein carrier protein | 13 | Phosphoryl STY(10)    | FTFTPPQGVTTIDDQRK               | 187 | 16 | 3  | 17.79  | b9y8y10                                                         | 1929.91 | 72.371  | 42164  | 3 | 643.97  | 3.48   |
| Q8ZQD4 LOLA_SALTY Outer-membrane lipoprotein carrier protein | 14 | Oxidation+M(27)       | TLWFYNPFVEQATATWLKDATGNTPFMLIAR | 85  | 31 | 4  | 35.97  | b5b6b7y12                                                       | 3618.86 | 130.779 | 3335   | 3 | 1206.96 | 13.63  |
| Q8ZQD4 LOLA_SALTY Outer-membrane lipoprotein carrier protein | 15 | Oxidation+M(9)        | RPNLFNWHMTQPDESILVSDGK          | 63  | 22 | 3  | 13.9   | b3b11y13                                                        | 2600.29 | 110.340 | 1692   | 3 | 867.44  | 14.18  |
| Q8ZQD4 LOLA_SALTY Outer-membrane lipoprotein carrier protein | 16 |                       | SSFHATFTQK                      | 34  | 10 | 0  | 2.26   |                                                                 | 1153.56 | 40.496  | 5846   | 2 | 577.28  | -6.46  |
| Q8ZK80 RL9_SALTY 50S ribosomal protein L9                    | 1  |                       | VANLGSLGDQVNVK                  | 8   | 14 | 24 | 178    | b1b2b3b5°b5b6b12b13°b13*b13b14y2y3y4y6y7°y7y8y9y10°y10y11y12y14 | 1413.76 | 56.501  | 122675 | 2 | 707.39  | -4.75  |
| Q8ZK80 RL9_SALTY 50S ribosomal protein L9                    | 2  |                       | MQVILLDK                        | 0   | 8  | 8  | 68.77  | b2°b2b3b5y4y5y6y8                                               | 959.55  | 63.795  | 91889  | 2 | 480.28  | -14.18 |
| Q8ZK80 RL9_SALTY 50S ribosomal protein L9                    | 3  |                       | DIADAVTAAGVDVAK                 | 97  | 15 | 11 | 118.71 | b2b6b8y3y4y6y7y9y10y11y13                                       | 1415.74 | 65.944  | 70279  | 2 | 708.37  | 0.17   |
| Q8ZK80 RL9_SALTY 50S ribosomal protein L9                    | 4  |                       | INALETVTIASK                    | 71  | 12 | 5  | 26.99  | b2b3b4y5y12                                                     | 1259.72 | 60.847  | 61057  | 2 | 630.36  | -3.49  |
| Q8ZK80 RL9_SALTY 50S ribosomal protein L9                    | 5  |                       | NVEYFEAR                        | 42  | 8  | 8  | 41.71  | b2°b2y2y4y5y6°y6y8                                              | 1027.48 | 46.195  | 53120  | 2 | 514.24  | -5.47  |
| Q8ZK80 RL9_SALTY 50S ribosomal protein L9                    | 6  |                       | NVEYFEARR                       | 42  | 9  | 5  | 31.3   | b1b8y4y6y9                                                      | 1183.57 | 51.799  | 7907   | 2 | 592.29  | -13.41 |
| Q8ZK80 RL9_SALTY 50S ribosomal protein L9                    | 7  |                       | TTGEHEVNFQVHSEVFAK              | 123 | 18 | 3  | 25.07  | b7b8b10                                                         | 2058.97 | 72.849  | 3306   | 2 | 1029.99 | -6.64  |
| Q8ZK80 RL9_SALTY 50S ribosomal protein L9                    | 8  |                       | LADVLAAANAR                     | 57  | 11 | 4  | 36.37  | b4b7y4y10                                                       | 1084.60 | 53.035  | 4172   | 1 | 1084.60 | -13.06 |
| Q8ZK80 RL9_SALTY 50S ribosomal protein L9                    | 9  |                       | LADVLAAANARA EK                 | 57  | 14 | 3  | 25.4   | b3b4y6                                                          | 1412.77 | 59.333  | 7260   | 2 | 706.89  | -12.70 |
| Q8ZK80 RL9_SALTY 50S ribosomal protein L9                    | 10 |                       | DIADAVTAAGVDVAKSEVR             | 97  | 19 | 3  | 35.07  | b5b6b7                                                          | 1886.96 | 74.544  | 5088   | 3 | 629.66  | -11.71 |
| Q8ZK80 RL9_SALTY 50S ribosomal protein L9                    | 11 |                       | LFGSIGTRDIADAVTAAGVDVAK         | 89  | 23 | 4  | 22.51  | b4b5°b5y14                                                      | 2247.19 | 94.864  | 3657   | 3 | 749.74  | -2.50  |
| Q8ZK80 RL9_SALTY 50S ribosomal protein L9                    | 12 |                       | NVEYFEARR                       | 42  | 9  | 5  | 46.08  | b3°b3b4y3y7                                                     | 1183.57 | 62.366  | 2088   | 2 | 592.29  | -14.13 |
| Q8ZK80 RL9_SALTY 50S ribosomal protein L9                    | 13 | Phosphoryl STY(8)     | INALETVTIASK                    | 71  | 12 | 3  | 23.01  | b3y4y6_H3PO4 y6                                                 | 1339.69 | 28.657  | 6319   | 2 | 670.35  | 10.84  |
| Q8ZK80 RL9_SALTY 50S ribosomal protein L9                    | 14 | Phosphoryl STY(6)     | VANLGSLGDQVNVK                  | 8   | 14 | 4  | 25.4   | b5°b5y10y11                                                     | 1493.74 | 81.575  | 2546   | 2 | 747.37  | 7.93   |
| P67091 UF_SALTY Universal stress protein F                   | 1  |                       | TILVPIDISDSELTQR                | 3   | 16 | 17 | 138.18 | b2b3b4y2y3y4y6°y6y8y9y11°y11y12°y12y13y14y16                    | 1799.98 | 81.903  | 143220 | 2 | 900.49  | 1.49   |
| P67091 UF_SALTY Universal stress protein F                   | 2  | Carbamidomethyl+ C(4) | HAECSVLVVR                      | 134 | 10 | 14 | 110.1  | b2b3°b3b4b7b9b10y2y3y4y8°y8y9y10                                | 1169.60 | 40.794  | 61581  | 2 | 585.30  | -7.51  |
| P67091 UF_SALTY Universal stress protein F                   | 3  |                       | SQLEAIKK                        | 69  | 9  | 12 | 63.12  | b2°b2*b2b3°b3°b3y2y3y4y5y7y9                                    | 1029.62 | 44.005  | 44103  | 2 | 515.32  | -6.05  |
| P67091 UF_SALTY Universal stress protein F                   | 4  |                       | VISHVEAEAK                      | 19  | 10 | 15 | 118.86 | b2b6b7b8y1y2y3°y3y4y5°y5y6y7y8y10                               | 1082.58 | 23.529  | 40806  | 2 | 541.79  | -5.86  |
| P67091 UF_SALTY Universal stress protein F                   | 5  |                       | VQAHVAEGSPK                     | 85  | 11 | 11 | 89.17  | b5y2y4°y4y5y6°y6y7y8y9y11                                       | 1122.58 | 18.279  | 10814  | 2 | 561.79  | -11.74 |

|                                            |    |                                                      |                                     |     |    |    |        |                                                       |         |         |        |   |         |        |
|--------------------------------------------|----|------------------------------------------------------|-------------------------------------|-----|----|----|--------|-------------------------------------------------------|---------|---------|--------|---|---------|--------|
| P67091 UF_SALTY Universal stress protein F | 6  |                                                      | VHFLTVPISLPYYASLGLAYSaelPAMDDLK     | 34  | 31 | 4  | 17.33  | y6y9°y9y11                                            | 3394.80 | 125.921 | 2620   | 3 | 1132.27 | 9.06   |
| P67091 UF_SALTY Universal stress protein F | 7  |                                                      | SQLEAIIK                            | 69  | 8  | 6  | 50.47  | b3°b3b5b6°b6y4                                        | 901.52  | 53.229  | 22626  | 2 | 451.27  | -13.40 |
| P67091 UF_SALTY Universal stress protein F | 8  |                                                      | ILEMAK                              | 98  | 6  | 1  | 13.9   | y4                                                    | 704.40  | 37.762  | 12319  | 1 | 704.40  | -8.23  |
| P67091 UF_SALTY Universal stress protein F | 9  |                                                      | LPADMVIIASHRPDITTYLLGSNAaAVVR       | 105 | 29 | 3  | 11.8   | b6y5y9                                                | 3064.63 | 88.809  | 7107   | 4 | 766.91  | -10.99 |
| P67091 UF_SALTY Universal stress protein F | 10 |                                                      | VHFLTVPISLPYYASLGLAYSaelPAMDDLKAEAK | 34  | 35 | 8  | 37.79  | b3b6°b6b7y4y10y11y14                                  | 3793.97 | 111.071 | 48587  | 4 | 949.25  | -2.12  |
| P67091 UF_SALTY Universal stress protein F | 11 |                                                      | ISHVEAEAK                           | 20  | 9  | 3  | 22.92  | b7°b7b8                                               | 983.51  | 23.524  | 18891  | 2 | 492.26  | -9.18  |
| P67091 UF_SALTY Universal stress protein F | 12 |                                                      | QAHVAEGSPK                          | 86  | 10 | 2  | 8.01   | b3*b3                                                 | 1023.51 | 18.273  | 2554   | 2 | 512.26  | -8.11  |
| P0A1P8 GLRX1_SALTY Glutaredoxin-1          | 1  |                                                      | TVGKPVETVPQIFVDQK                   | 50  | 17 | 10 | 47.28  | b3b9y2*y2y4y6*y6y8y13y17                              | 1885.02 | 64.647  | 52251  | 3 | 629.01  | -11.07 |
| P0A1P8 GLRX1_SALTY Glutaredoxin-1          | 2  | Carbamidomethyl+C(11)<br>;Carbamidomethyl+C(14)<br>) | MFTVIFGRPGCPYCVR                    | 0   | 16 | 13 | 105.41 | b2b3°b3b7b10y5y8y10y11y12y13y14y16                    | 1959.92 | 76.096  | 41352  | 3 | 653.98  | -10.09 |
| P0A1P8 GLRX1_SALTY Glutaredoxin-1          | 3  |                                                      | LSKERDDFNyR                         | 23  | 11 | 3  | 25.06  | b4y3y5                                                | 1442.70 | 51.417  | 2384   | 3 | 481.57  | -1.02  |
| P0A1P8 GLRX1_SALTY Glutaredoxin-1          | 4  |                                                      | YIDIHAEGITK                         | 34  | 11 | 3  | 28.07  | b3y6y7                                                | 1259.64 | 48.408  | 20569  | 3 | 420.55  | -18.61 |
| P0A1P8 GLRX1_SALTY Glutaredoxin-1          | 5  | Carbamidomethyl+C(5)                                 | HIGGCTDFEAWAK                       | 67  | 13 | 4  | 35.09  | b4b6b11y6                                             | 1491.65 | 36.752  | 2684   | 2 | 746.33  | -14.48 |
| P0A1P8 GLRX1_SALTY Glutaredoxin-1          | 6  | Carbamidomethyl+C(11)<br>;Carbamidomethyl+C(14)<br>) | MFTVIFGRPGCPYCVRAK                  | 0   | 18 | 4  | 16.15  | b12°b12y8y11                                          | 2159.09 | 73.157  | 6540   | 3 | 720.37  | 10.06  |
| P0A1P8 GLRX1_SALTY Glutaredoxin-1          | 7  | Carbamidomethyl+C(5)                                 | HIGGCTDFEAWAKENLNLFA                | 67  | 20 | 4  | 28.72  | b4b13y8y9                                             | 2293.06 | 51.879  | 2732   | 3 | 765.02  | -6.71  |
| P0A1P8 GLRX1_SALTY Glutaredoxin-1          | 8  |                                                      | PQIFVDQK                            | 59  | 8  | 1  | 7.26   | b3                                                    | 974.54  | 64.658  | 9034   | 1 | 974.54  | 12.21  |
| P0A1H3 EFG_SALTY Elongation factor G       | 1  |                                                      | IATDPFVGnLTFFR                      | 323 | 14 | 19 | 129.64 | b2b4°b4b6b7b12b14y1y2y3y4y6y7*y7y10*y10y11y12y14      | 1597.84 | 93.030  | 121205 | 2 | 799.42  | -1.45  |
| P0A1H3 EFG_SALTY Elongation factor G       | 2  |                                                      | IHAeVPLSEMFGYATQLR                  | 653 | 18 | 20 | 159.02 | b2b3b4b5b6b7b9y1y2y3*y3y4y5y6y7*y7y8y13y16y18         | 2062.03 | 89.041  | 96883  | 3 | 688.01  | -8.17  |
| P0A1H3 EFG_SALTY Elongation factor G       | 3  |                                                      | VYSGVNSGDTVLNSVK                    | 337 | 17 | 19 | 143.36 | b2b4b5b7b14b15*b15y4*y4y5y9y10y11°y11*y11y12y14y15y17 | 1737.90 | 61.854  | 88933  | 2 | 869.46  | 0.70   |
| P0A1H3 EFG_SALTY Elongation factor G       | 4  |                                                      | SGPLAGYPVVDLGVR                     | 562 | 15 | 15 | 95.03  | b2°b2b3°b3b5°b5b7°b7y3y4y8y9y10y11y15                 | 1499.82 | 76.335  | 67213  | 2 | 750.41  | -0.98  |
| P0A1H3 EFG_SALTY Elongation factor G       | 5  |                                                      | MEFPEPVISIAVEPK                     | 408 | 15 | 10 | 60.77  | b2b3b9b10b12y2y10y12y13y15                            | 1685.88 | 85.687  | 65458  | 2 | 843.45  | 1.45   |
| P0A1H3 EFG_SALTY Elongation factor G       | 6  |                                                      | IGEVHDGAATMDWMEQEQR                 | 39  | 20 | 12 | 57.21  | b2b8b11°b11b12°b12b13y1y6y7y9y20                      | 2331.99 | 61.668  | 64439  | 3 | 778.00  | -3.14  |
| P0A1H3 EFG_SALTY Elongation factor G       | 7  |                                                      | GQYGHVVIDMYPLEPGSNPK                | 512 | 20 | 20 | 137.96 | b2°b2b4b6b7°b7b8b9b11b12y5y6*y6y7°y7*y7y9y10°y10y11   | 2201.06 | 69.796  | 48815  | 3 | 734.36  | -5.44  |
| P0A1H3 EFG_SALTY Elongation factor G       | 8  |                                                      | HASDDEPFSALAFK                      | 309 | 14 | 5  | 19.96  | b2b6y9y12y14                                          | 1534.73 | 69.668  | 42846  | 2 | 767.87  | 10.02  |
| P0A1H3 EFG_SALTY Elongation factor G       | 9  |                                                      | LHFGSYHDVDSSELAFK                   | 577 | 17 | 10 | 37.36  | b1b2b6b7b9°b9b11y1y10y17                              | 1951.91 | 62.357  | 42162  | 3 | 651.31  | -6.07  |
| P0A1H3 EFG_SALTY Elongation factor G       | 10 |                                                      | VEVETPEENTGDVIGDLSR                 | 618 | 19 | 5  | 32.44  | y3y5y6y14y19                                          | 2059.00 | 66.599  | 40374  | 2 | 1030.00 | 6.52   |
| P0A1H3 EFG_SALTY Elongation factor G       | 11 |                                                      | GQSEVTGVK                           | 643 | 10 | 7  | 62.53  | b2b8y3y4y7°y7y8                                       | 1033.50 | 25.251  | 40203  | 2 | 517.25  | -13.11 |

|                                      |    |                       |                                                        |     |    |    |        |                                                                |         |         |       |   |         |        |
|--------------------------------------|----|-----------------------|--------------------------------------------------------|-----|----|----|--------|----------------------------------------------------------------|---------|---------|-------|---|---------|--------|
| P0A1H3 EFG_SALTY Elongation factor G | 12 | Carbamidomethyl+C(10) | VLDGAVMVYCAVGGVQPQSETV<br>WR                           | 104 | 24 | 9  | 65.71  | b5°b5b6b7y6y9y11y12y14                                         | 2621.29 | 85.814  | 35706 | 3 | 874.43  | 1.02   |
| P0A1H3 EFG_SALTY Elongation factor G | 13 |                       | ILFYTGvNHNK                                            | 29  | 10 | 7  | 69.52  | y3*y3y5y6y7y8y10                                               | 1191.64 | 54.309  | 32000 | 2 | 596.32  | -8.81  |
| P0A1H3 EFG_SALTY Elongation factor G | 14 |                       | LGANPVPLQLAIGAEEGFTGVVDL<br>VK                         | 161 | 26 | 8  | 50.96  | b4b5b6*b6y4y5y7y26                                             | 2607.43 | 119.879 | 30570 | 3 | 869.82  | -2.90  |
| P0A1H3 EFG_SALTY Elongation factor G | 15 | Carbamidomethyl+C(11) | VLNNEILVTCGSAFK                                        | 255 | 16 | 8  | 47.5   | b4b5*b5b12y6y8y10y16                                           | 1777.96 | 78.917  | 25259 | 2 | 889.48  | 4.33   |
| P0A1H3 EFG_SALTY Elongation factor G | 16 | Carbamidomethyl+C(20) | AGDIAAAIGLKDVTTGDTLCDPEN<br>PIILER                     | 378 | 30 | 17 | 80.32  | b3b5°b5b6°b6b7°b7b9b17b<br>27y2°y2y3y4y6y10y13                 | 3138.62 | 84.981  | 21704 | 3 | 1046.88 | 5.29   |
| P0A1H3 EFG_SALTY Elongation factor G | 17 |                       | GVQAMLDavidYLPSPVDVPAIN<br>GILDDGKDTPAER               | 273 | 36 | 16 | 76.73  | b2b3*b3b4b6b7b9b11*b11<br>y1y4y5y6y9y11y23                     | 3764.93 | 121.906 | 16688 | 3 | 1255.65 | 7.65   |
| P0A1H3 EFG_SALTY Elongation factor G | 18 |                       | GGVIPGEYIPAVDK                                         | 541 | 14 | 5  | 25.4   | b2b4y9y10y14                                                   | 1414.75 | 65.220  | 8821  | 2 | 707.88  | -3.71  |
| P0A1H3 EFG_SALTY Elongation factor G | 19 |                       | AINWNDADQGVTFEYEDIPADMQ<br>DLANEWHQNLIESAEESEELME<br>K | 189 | 47 | 22 | 169.83 | b3b4b5b6°b6b7b11°b11y2<br>°y2y3y4y5y6°y6y7y8y9y10<br>y12y13y29 | 5380.42 | 125.878 | 8384  | 4 | 1345.86 | 5.81   |
| P0A1H3 EFG_SALTY Elongation factor G | 20 |                       | VEVETPEENTGDVIGDLSRR                                   | 618 | 20 | 3  | 21.68  | b5b16b18                                                       | 2215.09 | 82.245  | 1888  | 3 | 739.03  | 1.10   |
| P0A1H3 EFG_SALTY Elongation factor G | 21 |                       | EFNVEANVGKPKVAYR                                       | 475 | 16 | 10 | 71.66  | b6b9b11y3y6y8*y8y9y11*<br>y11                                  | 1820.90 | 53.148  | 73193 | 3 | 607.64  | -15.35 |
| P0A1H3 EFG_SALTY Elongation factor G | 22 |                       | YDDAPNNVAQAVIEAR                                       | 686 | 16 | 4  | 17.79  | b4y3°y3y8                                                      | 1745.85 | 64.930  | 23817 | 2 | 873.43  | 4.13   |
| P0A1H3 EFG_SALTY Elongation factor G | 23 | Carbamidomethyl+C(9)  | DVTTGDTLCDPENPIILER                                    | 389 | 19 | 4  | 24.66  | y3y10y11*y11                                                   | 2158.05 | 70.441  | 19114 | 2 | 1079.53 | 9.05   |
| P0A1H3 EFG_SALTY Elongation factor G | 24 |                       | VVGQIK                                                 | 153 | 6  | 1  | 13.9   | b4                                                             | 643.41  | 44.712  | 12060 | 1 | 643.41  | -9.39  |
| P0A1H3 EFG_SALTY Elongation factor G | 25 |                       | MGLALGR                                                | 430 | 7  | 3  | 41.34  | y3y4y6                                                         | 717.39  | 49.493  | 10688 | 2 | 359.20  | -18.97 |
| P0A1H3 EFG_SALTY Elongation factor G | 26 |                       | TTPIAR                                                 | 3   | 6  | 1  | 13.9   | y3                                                             | 658.38  | 33.610  | 7185  | 1 | 658.38  | -11.03 |
| P0A1H3 EFG_SALTY Elongation factor G | 27 |                       | ADQEK                                                  | 425 | 5  | 2  | 13.53  | y4*y4                                                          | 590.28  | 58.276  | 5240  | 1 | 590.28  | 11.68  |
| P0A1H3 EFG_SALTY Elongation factor G | 28 |                       | NIGISAHIDAGK                                           | 11  | 12 | 9  | 64.26  | b7°b7b9y4°y4y5y7°y7y8                                          | 1195.62 | 36.323  | 2748  | 2 | 598.31  | -22.26 |
| P0A1H3 EFG_SALTY Elongation factor G | 29 |                       | GVQAMLDavidYLPSPVDVPAIN<br>GILDDGK                     | 273 | 30 | 6  | 20.18  | b4b7y3y8°y8y10                                                 | 3095.55 | 105.107 | 2166  | 3 | 1032.52 | -16.72 |
| P0A1H3 EFG_SALTY Elongation factor G | 30 |                       | QYEPHR                                                 | 77  | 6  | 1  | 13.9   | y3                                                             | 829.39  | 116.029 | 1559  | 1 | 829.39  | -7.51  |
| P0A1H3 EFG_SALTY Elongation factor G | 31 |                       | YLGGEELTEEEIKQALR                                      | 236 | 17 | 10 | 82.26  | b5°b5b7b12y3y4y5y10y11<br>y15                                  | 1977.99 | 73.026  | 91583 | 3 | 660.00  | -13.52 |
| P0A1H3 EFG_SALTY Elongation factor G | 32 |                       | ASYTMEFLKYDDAPNNVAQAVIE<br>AR                          | 677 | 25 | 11 | 86.76  | b8b9b11b12b13y3y4y5°y5<br>y8y12                                | 2816.36 | 83.989  | 67417 | 3 | 939.46  | 1.56   |
| P0A1H3 EFG_SALTY Elongation factor G | 33 |                       | GGVIPGEYIPAVDKGIQEQLK                                  | 541 | 21 | 4  | 25.5   | b3b4b11y12                                                     | 2211.18 | 73.991  | 24861 | 3 | 737.73  | -7.95  |
| P0A1H3 EFG_SALTY Elongation factor G | 34 |                       | AKPVLLEPIMKVEVETPEENTGDV<br>IGDLSR                     | 607 | 30 | 5  | 26.89  | y5y6y10y14°y14                                                 | 3278.69 | 83.531  | 19671 | 4 | 820.43  | -8.12  |
| P0A1H3 EFG_SALTY Elongation factor G | 35 |                       | NIGISAHIDAGKTTTTER                                     | 11  | 18 | 4  | 27.46  | b3b4b11y9                                                      | 1884.98 | 63.030  | 4468  | 3 | 629.00  | 3.24   |
| P0A1H3 EFG_SALTY Elongation factor G | 36 |                       | EFNVEANVGKPKVAYREAIR                                   | 475 | 20 | 6  | 38.56  | b4b10b11*b11b12*b12                                            | 2290.19 | 101.979 | 2391  | 2 | 1145.60 | -0.75  |
| P0A1H3 EFG_SALTY Elongation factor G | 37 |                       | GQSEVTGvKIHAEVPLSEMFGY<br>ATQLR                        | 643 | 28 | 5  | 27.36  | b6b9b10b12y16                                                  | 3076.54 | 119.957 | 2060  | 3 | 1026.19 | 0.40   |
| P0A1H3 EFG_SALTY Elongation factor G | 38 | Oxidation+M(5)        | GVQAMLDavidYLPSPVDVPAIN<br>GILDDGK                     | 273 | 30 | 4  | 26.89  | b3b6b7b10                                                      | 3111.64 | 86.949  | 78221 | 4 | 778.66  | 14.20  |

|                                                                    |    |                                          |                                    |     |    |    |        |                                                                |         |        |        |   |         |        |
|--------------------------------------------------------------------|----|------------------------------------------|------------------------------------|-----|----|----|--------|----------------------------------------------------------------|---------|--------|--------|---|---------|--------|
| P0A1H3 EFG_SALTY Elongation factor G                               | 39 | Carbamidomethyl+C(10)<br>;Oxidation+M(7) | VLDGAVMVYCAVGGVQPQSETV<br>WR       | 104 | 24 | 3  | 13.11  | b11y5y7                                                        | 2637.27 | 94.515 | 15730  | 3 | 879.76  | -3.80  |
| P0A1H3 EFG_SALTY Elongation factor G                               | 40 | Oxidation+M(10)                          | GQYGHVVIDMYPLEPGSNPK               | 512 | 20 | 4  | 21.68  | y6°y6y10y14                                                    | 2217.09 | 87.838 | 4477   | 2 | 1109.05 | 13.65  |
| P0A1H3 EFG_SALTY Elongation factor G                               | 41 |                                          | TPEENTGDVIGDLSRR                   | 622 | 16 | 1  | 7.43   | b11                                                            | 1758.89 | 82.220 | 15370  | 2 | 879.95  | 13.74  |
| P0A1H3 EFG_SALTY Elongation factor G                               | 42 |                                          | FYTGVDNHK                          | 31  | 8  | 0  | 1.89   |                                                                | 965.48  | 54.299 | 11666  | 2 | 483.24  | -7.40  |
| P0A1H3 EFG_SALTY Elongation factor G                               | 43 |                                          | VEVETPEENTGDVIGD                   | 618 | 16 | 0  | 5.66   |                                                                | 1702.77 | 82.224 | 8793   | 2 | 851.89  | 1.79   |
| P0A1H3 EFG_SALTY Elongation factor G                               | 44 |                                          | PFSALAFK                           | 315 | 8  | 0  | 3.4    |                                                                | 880.49  | 69.703 | 3516   | 2 | 440.75  | -8.32  |
| Q9ZF60 GLTI_SALTY Glutamate/aartate<br>periplasmic-binding protein | 1  |                                          | VVGYSQDYSNAIVEAVKK                 | 61  | 18 | 18 | 164.33 | b2b3b7b11y2y3y4y5y6y7y<br>10y11y12y14y16°y16y17y1<br>8         | 1970.00 | 63.020 | 209042 | 3 | 657.34  | -10.10 |
| Q9ZF60 GLTI_SALTY Glutamate/aartate<br>periplasmic-binding protein | 2  |                                          | ESSVPFSYYDNQQK                     | 47  | 14 | 19 | 129.64 | b3°b3b4°b4b7b11°b11y4y<br>5*y5y6y7y8*y8y9°y9y10*y<br>10y14     | 1691.75 | 55.314 | 194992 | 2 | 846.38  | -0.36  |
| Q9ZF60 GLTI_SALTY Glutamate/aartate<br>periplasmic-binding protein | 3  |                                          | VVGYSQDYSNAIVEAVK                  | 61  | 17 | 11 | 67.48  | b2b8b13b16y1y4y5y11y13<br>y15y17                               | 1841.93 | 67.471 | 153243 | 2 | 921.47  | 3.78   |
| Q9ZF60 GLTI_SALTY Glutamate/aartate<br>periplasmic-binding protein | 4  |                                          | AVAFMMDDALLAGER                    | 198 | 15 | 13 | 121.57 | b3b5b11b12°b12y3y4y5y1<br>0y11y12y13y15                        | 1609.78 | 84.339 | 144585 | 2 | 805.39  | 4.70   |
| Q9ZF60 GLTI_SALTY Glutamate/aartate<br>periplasmic-binding protein | 5  |                                          | NGVIVVGHR                          | 38  | 9  | 13 | 91.43  | b2°b2b3°b3b4°b4y2y3y4y<br>5y6y7y9                              | 950.54  | 31.817 | 108043 | 2 | 475.77  | -14.77 |
| Q9ZF60 GLTI_SALTY Glutamate/aartate<br>periplasmic-binding protein | 6  | Carbamidomethyl+C(19)                    | KPDNWEIVGKPQSQEAYGCMLRK            | 217 | 23 | 14 | 92.95  | b5b7b8°b8b11b13b16y5y6<br>y8y11y13y15y23                       | 2734.31 | 55.836 | 105096 | 4 | 684.33  | -12.68 |
| Q9ZF60 GLTI_SALTY Glutamate/aartate<br>periplasmic-binding protein | 7  |                                          | LIPITSQNR                          | 89  | 9  | 5  | 39.08  | b2y4y5y6y9                                                     | 1041.60 | 42.608 | 72262  | 2 | 521.30  | -8.32  |
| Q9ZF60 GLTI_SALTY Glutamate/aartate<br>periplasmic-binding protein | 8  | Carbamidomethyl+C(19)                    | KPDNWEIVGKPQSQEAYGCMLR             | 217 | 22 | 17 | 126.6  | b2b5°b5b6b7b10y2y4y5y6<br>y8y9y10y11°y11y12y22                 | 2606.21 | 61.130 | 59167  | 4 | 652.31  | -13.58 |
| Q9ZF60 GLTI_SALTY Glutamate/aartate<br>periplasmic-binding protein | 9  |                                          | QAAFSDTIFVVGTR                     | 122 | 14 | 10 | 62.01  | b2b3b14y1y3y5y6y10y12y<br>14                                   | 1511.79 | 76.512 | 51742  | 2 | 756.40  | 3.96   |
| Q9ZF60 GLTI_SALTY Glutamate/aartate<br>periplasmic-binding protein | 10 | Carbamidomethyl+C(13)                    | IPLLQNGTFDFECGSTTNLER              | 98  | 22 | 22 | 138.41 | b2b3b4b5y1y2y3y4°y4y5°<br>y5y6°y6°y6y8°y8y9°y9y10<br>y11y12y22 | 2526.22 | 81.539 | 51428  | 2 | 1263.61 | 9.86   |
| Q9ZF60 GLTI_SALTY Glutamate/aartate<br>periplasmic-binding protein | 11 |                                          | AVVVTSGTTSEILLHK                   | 154 | 16 | 6  | 36.68  | b3b4b10y4y12°y12                                               | 1654.94 | 57.505 | 26338  | 3 | 552.32  | 4.50   |
| Q9ZF60 GLTI_SALTY Glutamate/aartate<br>periplasmic-binding protein | 12 | Carbamidomethyl+C(21)                    | AKKPDNWEIVGKPQSQEAYGCML<br>R       | 215 | 24 | 11 | 61.5   | b2b7y4y5y7y8y10°y10y12y<br>16y24                               | 2805.39 | 57.080 | 22114  | 3 | 935.80  | 3.66   |
| Q9ZF60 GLTI_SALTY Glutamate/aartate<br>periplasmic-binding protein | 13 |                                          | LTTAMLVMGLSAGLAHAEDGAP<br>AAGSTLDK | 5   | 30 | 3  | 22.97  | y8y9y12                                                        | 2869.43 | 86.131 | 15395  | 3 | 957.15  | -3.57  |
| Q9ZF60 GLTI_SALTY Glutamate/aartate<br>periplasmic-binding protein | 14 |                                          | GGDIKDFPDLK                        | 141 | 11 | 6  | 54.34  | b4b5b6b10y7y11                                                 | 1204.61 | 35.489 | 7128   | 2 | 602.81  | -5.67  |
| Q9ZF60 GLTI_SALTY Glutamate/aartate<br>periplasmic-binding protein | 15 |                                          | IISAKDHGDSFR                       | 180 | 12 | 5  | 30.21  | y4°y4y10y11y12                                                 | 1345.67 | 68.809 | 4343   | 2 | 673.34  | -11.34 |

|                                                                 |    |                       |                                      |     |    |    |        |                                                                           |         |         |        |   |         |        |
|-----------------------------------------------------------------|----|-----------------------|--------------------------------------|-----|----|----|--------|---------------------------------------------------------------------------|---------|---------|--------|---|---------|--------|
| Q9ZF60 GLTI_SALTY Glutamate/aartate periplasmic-binding protein | 16 |                       | LMDDTIAQAQTSGEAEK                    | 247 | 17 | 3  | 16.91  | b9y7y9                                                                    | 1807.85 | 46.068  | 11272  | 2 | 904.43  | 4.05   |
| Q9ZF60 GLTI_SALTY Glutamate/aartate periplasmic-binding protein | 17 |                       | NDPEFK                               | 240 | 6  | 1  | 13.9   | y5                                                                        | 749.34  | 79.448  | 4769   | 1 | 749.34  | -3.01  |
| Q9ZF60 GLTI_SALTY Glutamate/aartate periplasmic-binding protein | 18 |                       | DFPDLK                               | 146 | 6  | 1  | 13.9   | b4                                                                        | 734.36  | 103.494 | 2368   | 1 | 734.36  | -11.64 |
| Q9ZF60 GLTI_SALTY Glutamate/aartate periplasmic-binding protein | 19 |                       | APNDK                                | 294 | 5  | 2  | 13.53  | y4*y4                                                                     | 544.27  | 29.202  | 2206   | 1 | 544.27  | -11.10 |
| Q9ZF60 GLTI_SALTY Glutamate/aartate periplasmic-binding protein | 20 | Carbamidomethyl+C(22) | LIPITSQNRIPLLQNGTFDFECGSTT<br>NNLER  | 89  | 31 | 7  | 35.06  | b3b10y6y9y10y13y29                                                        | 3548.79 | 86.735  | 344872 | 3 | 1183.60 | 3.51   |
| Q9ZF60 GLTI_SALTY Glutamate/aartate periplasmic-binding protein | 21 |                       | LMDDTIAQAQTSGEAEKWFDK                | 247 | 21 | 3  | 14.36  | b12y7y9                                                                   | 2384.14 | 85.030  | 4467   | 3 | 795.39  | 14.85  |
| Q9ZF60 GLTI_SALTY Glutamate/aartate periplasmic-binding protein | 22 | Oxidation+M(2)        | LMDDTIAQAQTSGEAEK                    | 247 | 17 | 4  | 27.05  | b10y7y9y13                                                                | 1823.85 | 80.573  | 8211   | 3 | 608.62  | 10.64  |
| Q9ZF60 GLTI_SALTY Glutamate/aartate periplasmic-binding protein | 23 | Oxidation+M(5)        | LTTAMLVMGLSAGLAHAEDGAP<br>AAGSTLDK   | 5   | 30 | 4  | 22.23  | b4b5°b5y25                                                                | 2885.41 | 111.427 | 6621   | 3 | 962.47  | -11.42 |
| Q9ZF60 GLTI_SALTY Glutamate/aartate periplasmic-binding protein | 24 |                       | PITSQNR                              | 91  | 7  | 1  | 9.02   | b6                                                                        | 815.43  | 42.611  | 21911  | 2 | 408.22  | -11.90 |
| Q9ZF60 GLTI_SALTY Glutamate/aartate periplasmic-binding protein | 25 | Carbamidomethyl+C(13) | IVGKPQSQEAYGCMLRK                    | 223 | 17 | 1  | 7.76   | b9                                                                        | 1965.00 | 55.833  | 4627   | 3 | 655.67  | -4.47  |
| P0A299 RL7_SALTY 50S ribosomal protein L7/L12                   | 1  |                       | DLVESAPAALK                          | 85  | 11 | 8  | 72.63  | b10y2y5y7y8y9y10y11                                                       | 1113.61 | 53.331  | 60340  | 2 | 557.31  | -7.23  |
| P0A299 RL7_SALTY 50S ribosomal protein L7/L12                   | 2  |                       | DQIIEAVSAMSVM DVVELISAMEE<br>K       | 5   | 25 | 26 | 173.18 | b2°b2*b2b3b4*b4b5b6*b6<br>b7b8°b8b10y2°y2y3y4y5y6<br>y7y9y10y12y13°y13y25 | 2737.34 | 137.064 | 46462  | 3 | 913.12  | 0.89   |
| P0A299 RL7_SALTY 50S ribosomal protein L7/L12                   | 3  |                       | SLEEAGAEVEVK                         | 109 | 12 | 4  | 30.21  | b4b5°b5b9                                                                 | 1260.63 | 47.029  | 2104   | 2 | 630.82  | -0.39  |
| P0A299 RL7_SALTY 50S ribosomal protein L7/L12                   | 4  |                       | SITK DQIIEAVSAMSVM DVVELISA<br>MEEK  | 1   | 29 | 4  | 36.93  | y4y6y7y8                                                                  | 3166.62 | 136.331 | 6485   | 3 | 1056.21 | 7.02   |
| P0A299 RL7_SALTY 50S ribosomal protein L7/L12                   | 5  |                       | AAGANKVAVIK                          | 60  | 11 | 3  | 28.07  | b3y4y5                                                                    | 1041.63 | 28.780  | 6462   | 2 | 521.32  | -11.48 |
| P0A299 RL7_SALTY 50S ribosomal protein L7/L12                   | 6  | Phosphoryl STY(8)     | EAKDLVESAPAALK                       | 82  | 14 | 4  | 28.56  | b7b11y7y9                                                                 | 1521.73 | 66.133  | 52675  | 2 | 761.37  | -13.32 |
| P0A299 RL7_SALTY 50S ribosomal protein L7/L12                   | 7  | Oxidation+M()         | MSITK DQIIEAVSAMSVM DVVELI<br>SAMEEK | 0   | 30 | 6  | 30.78  | b6b7y5y7y9°y9                                                             | 3313.59 | 100.899 | 8389   | 3 | 1105.20 | -11.79 |
| P0A299 RL7_SALTY 50S ribosomal protein L7/L12                   | 8  | Oxidation+M(22)       | DQIIEAVSAMSVM DVVELISAMEE<br>K       | 5   | 25 | 5  | 26.54  | b3b4y7°y7y9                                                               | 2753.36 | 110.675 | 4395   | 3 | 918.46  | 12.06  |
| Q7CQ05 GRCA_SALTY Autonomous glycyl radical cofactor            | 1  |                       | SGFAEDEVVAVSK                        | 35  | 13 | 12 | 102.21 | b3°b3b4b10y2y4y5y8y9y1<br>0y12y13                                         | 1337.65 | 54.177  | 84501  | 2 | 669.33  | -3.65  |
| Q7CQ05 GRCA_SALTY Autonomous glycyl radical cofactor            | 2  |                       | EIPMEVKPEVR                          | 55  | 11 | 7  | 66.89  | y2y4y6y7y8y9y11                                                           | 1326.71 | 48.034  | 58522  | 2 | 663.86  | -0.37  |
| Q7CQ05 GRCA_SALTY Autonomous glycyl radical cofactor            | 3  |                       | AANDDLLNSFWLLDSEK                    | 9   | 17 | 5  | 16.91  | b6b12y2y13y17                                                             | 1950.96 | 87.652  | 57373  | 2 | 975.98  | 8.95   |
| Q7CQ05 GRCA_SALTY Autonomous glycyl radical cofactor            | 4  |                       | FNSLTPEQQR                           | 106 | 10 | 14 | 115.85 | b2°b2b5b8b9y2y3y5°y5y6<br>y7y8y9y10                                       | 1219.60 | 37.635  | 52326  | 2 | 610.30  | -8.21  |
| Q7CQ05 GRCA_SALTY Autonomous glycyl radical cofactor            | 5  |                       | MITGIQITK                            | 0   | 9  | 9  | 90.18  | b3°b3y3y4°y4y5y6y7y8                                                      | 1004.57 | 54.671  | 94436  | 2 | 502.79  | -15.19 |

|                                                      |    |  |                            |     |    |    |        |                                                                             |         |         |        |   |        |        |
|------------------------------------------------------|----|--|----------------------------|-----|----|----|--------|-----------------------------------------------------------------------------|---------|---------|--------|---|--------|--------|
| Q7CQ05 GRCA_SALTY Autonomous glycyI radical cofactor | 6  |  | VEGGQHNLNVNVL              | 66  | 13 | 11 | 125.07 | b6b8y3y4y5y6*y6y7y8y11y12                                                   | 1434.75 | 49.580  | 87644  | 3 | 478.92 | -18.89 |
| Q7CQ05 GRCA_SALTY Autonomous glycyI radical cofactor | 7  |  | AANDDLLNSFWLLDSEKGEAR      | 9   | 21 | 28 | 261.91 | b3b5°b5*b5b6°b6b7*b7b9y3y4y5y7°y7y8y9y10y11y12y13y14*y14y15*y15y16y17y18y19 | 2364.14 | 92.271  | 212972 | 3 | 788.72 | -3.92  |
| Q7CQ05 GRCA_SALTY Autonomous glycyI radical cofactor | 8  |  | MITGIQITKAANDDLLNSFWLLDSEK | 0   | 26 | 6  | 28.45  | b21y3°y3y7y8y12                                                             | 2936.52 | 105.121 | 14899  | 3 | 979.51 | 5.65   |
| Q7CQ05 GRCA_SALTY Autonomous glycyI radical cofactor | 9  |  | VSGYAVRFNSLTPEQQR          | 99  | 17 | 4  | 16.91  | b4y4°y4y9                                                                   | 1952.01 | 59.192  | 3024   | 3 | 651.34 | 4.38   |
| Q7CQ05 GRCA_SALTY Autonomous glycyI radical cofactor | 10 |  | PMEVKPEVR                  | 57  | 9  | 3  | 32.05  | b3b4b7                                                                      | 1084.58 | 48.025  | 58518  | 2 | 542.79 | -5.29  |
| Q7CQ05 GRCA_SALTY Autonomous glycyI radical cofactor | 11 |  | EIPMEVKPEVR                | 55  | 11 | 0  | 2.26   |                                                                             | 1308.68 | 48.015  | 18291  | 3 | 436.90 | -13.06 |
| P41031 CY_SALTY Thiosulfate-binding protein          | 1  |  | AYLNLWLYSPQAQTIIITHYYR     | 265 | 21 | 27 | 230.71 | b2b3b4*b4b6°b6b9y2y3y4y5y6y7y8y9y10y11°y11y13y14y15y16y17y19°y19y21*y21     | 2664.32 | 92.752  | 180847 | 3 | 888.78 | -2.20  |
| P41031 CY_SALTY Thiosulfate-binding protein          | 2  |  | GLGDVLISFESEVNNIRK         | 208 | 18 | 25 | 180.49 | b2b4b5°b5b6b12y2y4*y4y5y6y8*y8y9°y9*y9y10y11°y11*y11y12y13y14y16y18         | 1990.03 | 100.715 | 157957 | 3 | 664.02 | -13.25 |
| P41031 CY_SALTY Thiosulfate-binding protein          | 3  |  | ELFAALNPPFEQQWAK           | 37  | 16 | 16 | 72.33  | b3b5b6°b6b7*y1y4*y4y6y9*y9y12y13°y13*y13y16                                 | 1888.97 | 89.640  | 141119 | 2 | 944.99 | 7.17   |
| P41031 CY_SALTY Thiosulfate-binding protein          | 4  |  | LPNNSSPFYSTMGFLVR          | 110 | 17 | 20 | 180.9  | b4b5°b5b6°b6y1y2y3y4y5y6y8y9y11°y11y12y13y14y15y17                          | 1929.96 | 91.761  | 112331 | 2 | 965.48 | 3.86   |
| P41031 CY_SALTY Thiosulfate-binding protein          | 5  |  | FGSWPEVMK                  | 311 | 9  | 8  | 58.63  | b2y1y2y3y5y7y8y9                                                            | 1080.51 | 68.112  | 107412 | 2 | 540.76 | -8.47  |
| P41031 CY_SALTY Thiosulfate-binding protein          | 6  |  | VNNPEIMGK                  | 286 | 9  | 12 | 93.19  | b2*b2b3b5b6y3y6y7*y7y8*y8y9                                                 | 1001.50 | 35.836  | 102481 | 2 | 501.25 | -11.70 |
| P41031 CY_SALTY Thiosulfate-binding protein          | 7  |  | TEQFMTQFLK                 | 179 | 10 | 8  | 62.53  | b2b4°b4y3y5y7y8y10                                                          | 1272.62 | 75.036  | 99240  | 2 | 636.82 | -4.22  |
| P41031 CY_SALTY Thiosulfate-binding protein          | 8  |  | NIHDWSDLVR                 | 132 | 10 | 15 | 115.85 | b1*b1b3°b3b4b7y1y2y3y4y5y6y7y8y10                                           | 1254.62 | 62.059  | 84703  | 2 | 627.81 | -5.94  |
| P41031 CY_SALTY Thiosulfate-binding protein          | 9  |  | QYEAQGFVVIK                | 226 | 13 | 14 | 93.24  | b2*b2b3°b3b7b13y2y3y5y8y9y10y11y13                                          | 1507.77 | 69.586  | 82451  | 2 | 754.39 | -3.72  |
| P41031 CY_SALTY Thiosulfate-binding protein          | 10 |  | NVEVFDTGGR                 | 189 | 10 | 10 | 72.26  | b1b2b5b8y4y6y7y8°y8y10                                                      | 1093.52 | 46.836  | 67199  | 2 | 547.26 | -5.02  |
| P41031 CY_SALTY Thiosulfate-binding protein          | 11 |  | QALAILQLK                  | 71  | 10 | 11 | 76.06  | b2*b2b3°b3b10y1y3y4y5y6y7                                                   | 1054.65 | 74.580  | 65283  | 2 | 527.83 | -11.81 |
| P41031 CY_SALTY Thiosulfate-binding protein          | 12 |  | GATTTFAER                  | 199 | 9  | 6  | 55.62  | y1y3y4y5y7y9                                                                | 953.46  | 30.292  | 29058  | 2 | 477.23 | -9.92  |
| P41031 CY_SALTY Thiosulfate-binding protein          | 13 |  | GLGDVLISFESEVNNIR          | 208 | 17 | 5  | 30.82  | b6b13y10*y10y11                                                             | 1861.97 | 106.797 | 25587  | 2 | 931.49 | 2.29   |
| P41031 CY_SALTY Thiosulfate-binding protein          | 14 |  | ADVVTYNQVTDVQILHDK         | 81  | 18 | 6  | 22.62  | b2b3b12y3y7y18                                                              | 2058.04 | 63.598  | 15659  | 3 | 686.68 | -6.76  |
| P41031 CY_SALTY Thiosulfate-binding protein          | 15 |  | YTYLAAWGAADNADGGDK         | 159 | 18 | 3  | 16.15  | b6b8y4                                                                      | 1858.84 | 53.149  | 5311   | 4 | 465.47 | 10.31  |
| P41031 CY_SALTY Thiosulfate-binding protein          | 16 |  | ELFAALNPPFEQQWAKDNGGDK     | 37  | 22 | 3  | 13.9   | b15b20y12                                                                   | 2475.21 | 92.050  | 2403   | 4 | 619.56 | 5.92   |
| P41031 CY_SALTY Thiosulfate-binding protein          | 17 |  | LIFPNPK                    | 146 | 7  | 4  | 41.34  | b5y3y5*y5                                                                   | 828.48  | 55.587  | 78375  | 2 | 414.75 | -16.06 |
| P41031 CY_SALTY Thiosulfate-binding protein          | 18 |  | TNILAEFPVAWVDKNVQANGTEK    | 239 | 23 | 17 | 165.68 | b3b4b5b6y4y6y7*y7y9y11y12*y12y16y17y18y19y20                                | 2544.30 | 90.289  | 159609 | 3 | 848.77 | -2.49  |

|                                             |    |  |                                    |     |    |    |        |                                             |         |         |        |   |         |        |
|---------------------------------------------|----|--|------------------------------------|-----|----|----|--------|---------------------------------------------|---------|---------|--------|---|---------|--------|
| P41031 CY_SALTY Thiosulfate-binding protein | 19 |  | YTYLAAWGAADNADGGDKAK               | 159 | 20 | 7  | 54.11  | b4b19y6y9y11y15y18                          | 2057.94 | 61.746  | 104391 | 3 | 686.65  | -8.90  |
| P41031 CY_SALTY Thiosulfate-binding protein | 20 |  | KQYEAQGFEVVIPK                     | 225 | 14 | 6  | 43.71  | b4*b4b8b11b12y3                             | 1635.86 | 62.812  | 30946  | 3 | 545.96  | -11.27 |
| P41031 CY_SALTY Thiosulfate-binding protein | 21 |  | NVEVFDTGGRGATTTFAER                | 189 | 19 | 3  | 24.66  | y6y7y11                                     | 2027.97 | 68.022  | 26768  | 3 | 676.66  | -4.94  |
| P41031 CY_SALTY Thiosulfate-binding protein | 22 |  | ADVVTYNQVTDVQILHDKGK               | 81  | 20 | 5  | 26.08  | b3b4b11y5°y5                                | 2243.15 | 58.401  | 25409  | 3 | 748.39  | -5.55  |
| P41031 CY_SALTY Thiosulfate-binding protein | 23 |  | THFASGGELDKLLAAGR                  | 320 | 17 | 3  | 23.9   | b10y4y5                                     | 1742.89 | 65.412  | 16478  | 3 | 581.64  | -13.80 |
| P41031 CY_SALTY Thiosulfate-binding protein | 24 |  | AYLNWLYSPPQAQTIITHYYRVN<br>NPEIMGK | 265 | 30 | 6  | 41.06  | b6b8b9b10b12°b12                            | 3646.80 | 84.138  | 7681   | 5 | 730.17  | -4.42  |
| P41031 CY_SALTY Thiosulfate-binding protein | 25 |  | FGSWPEVMKTHFASGGELDK               | 311 | 20 | 4  | 23.44  | b12y6y9y12                                  | 2223.06 | 69.767  | 7507   | 3 | 741.69  | 1.54   |
| P41031 CY_SALTY Thiosulfate-binding protein | 26 |  | TSGNARYTYLAAWGAADNADGG<br>DK       | 153 | 24 | 3  | 19.42  | b7b10b12                                    | 2445.08 | 100.030 | 6660   | 3 | 815.70  | -10.18 |
| P41031 CY_SALTY Thiosulfate-binding protein | 27 |  | VEEKFGSWPEVMK                      | 307 | 13 | 5  | 26.12  | b10b11°b11y11°y11                           | 1565.78 | 87.257  | 5104   | 2 | 783.39  | 9.67   |
| P41031 CY_SALTY Thiosulfate-binding protein | 28 |  | GNPKNIHDWSDLVR                     | 128 | 14 | 4  | 25.4   | b8b9°b9y8                                   | 1650.82 | 52.725  | 2910   | 2 | 825.91  | -7.99  |
| P41031 CY_SALTY Thiosulfate-binding protein | 29 |  | QADKFPQTELFR                       | 295 | 12 | 3  | 23.01  | b5b11y5                                     | 1479.76 | 82.003  | 1918   | 2 | 740.38  | 0.50   |
| P41031 CY_SALTY Thiosulfate-binding protein | 30 |  | AKTEQFMTQFLK                       | 177 | 12 | 4  | 26.99  | b4y10y11°y11                                | 1471.77 | 39.293  | 1771   | 2 | 736.39  | 6.47   |
| P41031 CY_SALTY Thiosulfate-binding protein | 31 |  | NIHDWSDLVRSDVK                     | 132 | 14 | 5  | 31.73  | b3b10b11°b11y9                              | 1683.84 | 81.111  | 1736   | 2 | 842.42  | -5.07  |
| P41031 CY_SALTY Thiosulfate-binding protein | 32 |  | GSWPEVMK                           | 312 | 8  | 1  | 9.02   | b4                                          | 933.44  | 68.114  | 4478   | 1 | 933.44  | -6.93  |
| P41031 CY_SALTY Thiosulfate-binding protein | 33 |  | TTTFAER                            | 201 | 7  | 1  | 9.02   | b4                                          | 825.40  | 30.342  | 3335   | 2 | 413.20  | -9.32  |
| P41031 CY_SALTY Thiosulfate-binding protein | 34 |  | NVEVFDTG                           | 189 | 8  | 0  | 1.89   |                                             | 880.41  | 46.839  | 2548   | 1 | 880.41  | 0.42   |
| P41031 CY_SALTY Thiosulfate-binding protein | 35 |  | AALNPPFEQQWAK                      | 40  | 13 | 0  | 4.15   |                                             | 1499.78 | 89.635  | 1560   | 2 | 750.39  | 8.38   |
| P41031 CY_SALTY Thiosulfate-binding protein | 36 |  | NIHDWSDLVR                         | 132 | 10 | 0  | 1.89   |                                             | 1237.59 | 62.049  | 3725   | 3 | 413.20  | -4.73  |
| P41031 CY_SALTY Thiosulfate-binding protein | 37 |  | QALAILQGLK                         | 71  | 10 | 0  | 1.89   |                                             | 1037.62 | 74.575  | 1919   | 2 | 519.32  | -8.12  |
| P67904 RS10_SALTY 30S ribosomal protein S10 | 1  |  | FTVLISPHVNKDAR                     | 48  | 14 | 13 | 76.62  | b4b12y2y5*y5y6y7°y7*y7y8y9*y9y14            | 1596.86 | 52.704  | 100222 | 3 | 532.96  | -14.07 |
| P67904 RS10_SALTY 30S ribosomal protein S10 | 2  |  | LIDQSTAEIVETAKR                    | 16  | 15 | 17 | 170.08 | b9*b9b10y1y3y4y5y6y7y8y9y10y11°y11y12y13y15 | 1673.88 | 51.823  | 91228  | 3 | 558.63  | -14.29 |
| P67904 RS10_SALTY 30S ribosomal protein S10 | 3  |  | LIDQSTAEIVETAK                     | 16  | 14 | 14 | 112.59 | b2b10y2y3y4y5y7y8y9y10°y10y11*y11y14        | 1517.80 | 55.359  | 71124  | 2 | 759.40  | -3.70  |
| P67904 RS10_SALTY 30S ribosomal protein S10 | 4  |  | LVDIVEPTEK                         | 72  | 10 | 6  | 62.53  | b3y4y6y8y9y10                               | 1142.62 | 51.636  | 45875  | 2 | 571.82  | -4.81  |
| P67904 RS10_SALTY 30S ribosomal protein S10 | 5  |  | GPIPLPTRK                          | 37  | 9  | 6  | 39.08  | b2y4°y4y5y6y9                               | 978.60  | 42.595  | 43534  | 2 | 489.80  | -9.42  |
| P67904 RS10_SALTY 30S ribosomal protein S10 | 6  |  | FTVLISPHVNKDARDQYEIR               | 48  | 20 | 4  | 14.89  | b8y6°y6y11                                  | 2401.26 | 68.805  | 2067   | 2 | 1201.13 | -1.53  |
| P67904 RS10_SALTY 30S ribosomal protein S10 | 7  |  | FTVLISPHVNVK                       | 48  | 11 | 6  | 66.89  | y3*y3y4y6y7y8                               | 1254.70 | 57.720  | 48483  | 3 | 418.90  | -17.41 |
| P67904 RS10_SALTY 30S ribosomal protein S10 | 8  |  | DQYEIR                             | 62  | 6  | 3  | 27.43  | y4y5*y5                                     | 823.38  | 31.095  | 19965  | 2 | 412.20  | -12.38 |
| P67904 RS10_SALTY 30S ribosomal protein S10 | 9  |  | RLVDIVEPTEK                        | 71  | 11 | 8  | 100.48 | b3b4b5b6b7b10y4y6                           | 1298.73 | 50.333  | 56464  | 2 | 649.87  | -4.70  |
| P67904 RS10_SALTY 30S ribosomal protein S10 | 10 |  | IPLPTRK                            | 39  | 7  | 0  | 1.51   |                                             | 824.52  | 42.601  | 8098   | 2 | 412.77  | -12.73 |

|                                             |    |  |                                        |     |    |    |        |                                                                           |         |         |       |   |         |        |
|---------------------------------------------|----|--|----------------------------------------|-----|----|----|--------|---------------------------------------------------------------------------|---------|---------|-------|---|---------|--------|
| P67904 RS10_SALTY 30S ribosomal protein S10 | 11 |  | VLISPHVNKDAR                           | 50  | 12 | 0  | 3.4    |                                                                           | 1348.75 | 52.700  | 7825  | 3 | 450.26  | -12.67 |
| P67904 RS10_SALTY 30S ribosomal protein S10 | 12 |  | ISPHVNKDAR                             | 52  | 10 | 0  | 3.4    |                                                                           | 1136.61 | 52.699  | 6545  | 2 | 568.81  | -8.38  |
| P67904 RS10_SALTY 30S ribosomal protein S10 | 13 |  | TVLISPHVNKDAR                          | 49  | 13 | 0  | 3.4    |                                                                           | 1449.81 | 52.683  | 3034  | 3 | 483.94  | -8.08  |
| P02906 SUBI_SALTY Sulfate-binding protein   | 1  |  | YLYSPEGQEIAAK                          | 263 | 13 | 19 | 150.57 | b2b3b4°b4b7b10y2y3y4y5y7y8°y8°y8y9°y9y10y11y13                            | 1468.73 | 50.510  | 64449 | 2 | 734.87  | -1.83  |
| P02906 SUBI_SALTY Sulfate-binding protein   | 2  |  | LFTIDEVFGGWAK                          | 298 | 13 | 12 | 78.47  | b2b3°b3b4b13y2y3y4y5y7y8y13                                               | 1482.76 | 101.497 | 45636 | 2 | 741.88  | -0.74  |
| P02906 SUBI_SALTY Sulfate-binding protein   | 3  |  | NVEVLDSGAR                             | 183 | 10 | 11 | 90.56  | b2b3°b3b4y2y4y5y6y7y8y10                                                  | 1059.54 | 39.764  | 35301 | 2 | 530.27  | -3.23  |
| P02906 SUBI_SALTY Sulfate-binding protein   | 4  |  | AVAEAYLK                               | 255 | 8  | 6  | 41.71  | y1y2y4y5y6y8                                                              | 864.47  | 40.535  | 25425 | 2 | 432.74  | -12.21 |
| P02906 SUBI_SALTY Sulfate-binding protein   | 5  |  | QETGDNVVIR                             | 48  | 10 | 7  | 56     | b10y3y4y7°y7y8y10                                                         | 1130.57 | 35.035  | 19550 | 2 | 565.79  | -6.05  |
| P02906 SUBI_SALTY Sulfate-binding protein   | 6  |  | DHFANGGTFDQISKR                        | 314 | 15 | 8  | 30.4   | b2b3y3y6°y6y7°y7y15                                                       | 1692.79 | 43.644  | 15364 | 3 | 564.93  | -11.75 |
| P02906 SUBI_SALTY Sulfate-binding protein   | 7  |  | QATSVINGIEADVVTALAYDVD AIAER           | 66  | 28 | 13 | 93.37  | b2b3°b3b4b17y3°y3y5y6y7y8y9y10                                            | 2917.52 | 127.851 | 12249 | 3 | 973.18  | 0.17   |
| P02906 SUBI_SALTY Sulfate-binding protein   | 8  |  | AQKDHFANGGTFDQISK                      | 311 | 17 | 5  | 30.82  | b4°b4b9y10y11                                                             | 1863.91 | 55.950  | 6718  | 3 | 621.98  | 8.78   |
| P02906 SUBI_SALTY Sulfate-binding protein   | 9  |  | DIQLLNVSYPDTRELYEQYNK                  | 20  | 21 | 5  | 24.02  | y4y5°y5y7y21                                                              | 2601.30 | 81.505  | 1516  | 3 | 867.77  | 7.60   |
| P02906 SUBI_SALTY Sulfate-binding protein   | 10 |  | WNYLAAWGYALHHNNNDQAK                   | 153 | 20 | 12 | 88     | b3b5b6y8y9y11y13°y13°y13y14y16y18                                         | 2386.06 | 78.018  | 64453 | 4 | 597.27  | -19.95 |
| P02906 SUBI_SALTY Sulfate-binding protein   | 11 |  | GSTNTFVER                              | 193 | 9  | 8  | 66.13  | b4°b4b5b7b8°b8°b8y3                                                       | 1010.48 | 31.595  | 26983 | 2 | 505.75  | -6.22  |
| P02906 SUBI_SALTY Sulfate-binding protein   | 12 |  | ELYEQYNK                               | 33  | 8  | 8  | 68.77  | b3b4b7°b7y4°y4y6°y6                                                       | 1086.49 | 34.968  | 7452  | 2 | 543.75  | -18.31 |
| P02906 SUBI_SALTY Sulfate-binding protein   | 13 |  | QIHDWNLIKPGVSVITPNPK                   | 126 | 21 | 10 | 85.11  | b5b6b7b9b12°b12b14y4y5y6                                                  | 2371.30 | 72.293  | 4307  | 2 | 1186.15 | 10.09  |
| P02906 SUBI_SALTY Sulfate-binding protein   | 14 |  | GIGDVLIAWENEALLATNELGK                 | 202 | 22 | 3  | 13.9   | b5b10y13                                                                  | 2326.18 | 113.257 | 2891  | 3 | 776.07  | -19.00 |
| P02906 SUBI_SALTY Sulfate-binding protein   | 15 |  | RLPDNSAPYTSTIVFLVR                     | 103 | 18 | 9  | 88.53  | b4b5b6b7b9y3y4y5y11                                                       | 2049.09 | 82.340  | 43084 | 3 | 683.70  | -10.37 |
| P02906 SUBI_SALTY Sulfate-binding protein   | 16 |  | NVEVLDSGARGSTNTFVER                    | 183 | 19 | 5  | 35.07  | b7°b7b8°b8b9                                                              | 2051.00 | 108.989 | 2956  | 3 | 684.34  | -7.74  |
| P02906 SUBI_SALTY Sulfate-binding protein   | 17 |  | QSHGGSGKQATSVINGIEADVVTL ALAYDVD AIAER | 58  | 36 | 4  | 22.59  | b9°b9b10y12                                                               | 3655.81 | 125.967 | 2446  | 3 | 1219.27 | -13.89 |
| P02906 SUBI_SALTY Sulfate-binding protein   | 18 |  | AFSAHWKQETGDNVVIR                      | 41  | 17 | 3  | 16.91  | b7y7y12                                                                   | 1958.01 | 72.247  | 2191  | 2 | 979.51  | 9.16   |
| P02906 SUBI_SALTY Sulfate-binding protein   | 19 |  | IQLLNVSYPDTRELYEQYNK                   | 21  | 20 | 0  | 6.04   |                                                                           | 2486.23 | 81.532  | 4974  | 3 | 829.41  | -11.98 |
| P02906 SUBI_SALTY Sulfate-binding protein   | 20 |  | FDQISKR                                | 322 | 7  | 0  | 3.77   |                                                                           | 893.49  | 43.660  | 3923  | 2 | 447.25  | 2.94   |
| P66038 RISB_SALTY 6                         | 1  |  | IGQVKDDNITVVWVPGAYELPLA TEALAK         | 40  | 29 | 25 | 160.81 | b3b4b8b9°b9b10°b10b11°b11b12°b12b13°b13°b13b14°b14y2y3y4y9y11y12y15y16y29 | 3110.70 | 98.135  | 82056 | 3 | 1037.57 | 5.81   |
| P66038 RISB_SALTY 6                         | 2  |  | GAEAALTALEMINVLK                       | 136 | 16 | 21 | 122.91 | b2b4°b4b5b6b7°b7b8°b8b12°b12b13°b13°b13b14°b14y2y4y6y10y16                | 1643.91 | 102.561 | 69364 | 2 | 822.46  | 1.11   |
| P66038 RISB_SALTY 6                         | 3  |  | FNQFINDSLLDGAVDALTR                    | 21  | 19 | 16 | 131.17 | b2b3b5b8y2y3y4y5y8y9y10y13y14y15y19°y19                                   | 2109.07 | 100.883 | 59692 | 2 | 1055.04 | 6.14   |
| P66038 RISB_SALTY 6                         | 4  |  | VAIT IAR                               | 14  | 7  | 6  | 54.86  | y2y3y4y5y6y7                                                              | 743.47  | 43.903  | 7427  | 2 | 372.24  | -12.56 |



|                                                    |    |                                       |                                                |     |    |    |        |                                                                            |         |         |        |   |         |        |
|----------------------------------------------------|----|---------------------------------------|------------------------------------------------|-----|----|----|--------|----------------------------------------------------------------------------|---------|---------|--------|---|---------|--------|
| [P66038]RISB_SALTY 6                               | 5  |                                       | ANVAAPDAR                                      | 5   | 9  | 8  | 46.59  | b2*b2b8y1y2y5y6y7                                                          | 884.45  | 22.633  | 6385   | 2 | 442.73  | -10.08 |
| [P66038]RISB_SALTY 6                               | 6  |                                       | YDAVVALGTVIR                                   | 72  | 12 | 5  | 51.03  | b3b6b7b9y5                                                                 | 1276.70 | 60.974  | 4567   | 3 | 426.24  | -19.98 |
| [P66038]RISB_SALTY 6                               | 7  |                                       | AGNKGAEAAALTALEMINVLK                          | 132 | 20 | 5  | 42.56  | b7b16y3y4y5                                                                | 2014.08 | 96.708  | 28253  | 3 | 672.03  | -10.00 |
| [P66764]METK_SALTY S-adenosylmethionine synthetase | 1  |                                       | SLQEAVMEEIHKPILPSEWLNSTSTK                     | 197 | 25 | 26 | 156.75 | b2b5°b5b10*b10b11*b11b12b13b15b18y1y2y3y4y5°y5y7y10y11y12*y12y13*y13y14y25 | 2856.52 | 110.822 | 59893  | 3 | 952.85  | 5.04   |
| [P66764]METK_SALTY S-adenosylmethionine synthetase | 2  |                                       | FFINPTGR                                       | 222 | 8  | 5  | 36.94  | b2b4b7y4y8                                                                 | 951.49  | 59.905  | 54866  | 2 | 476.25  | -13.02 |
| [P66764]METK_SALTY S-adenosylmethionine synthetase | 3  | Carbamidomethyl+C(10)                 | FVIGGPMGDCGLTGR                                | 230 | 15 | 7  | 26.87  | b2y2y6°y6y12y13y15                                                         | 1536.73 | 68.426  | 31063  | 2 | 768.87  | 0.79   |
| [P66764]METK_SALTY S-adenosylmethionine synthetase | 4  | Carbamidomethyl+C(10)                 | FVIGGPMGDCGLTGRK                               | 230 | 16 | 9  | 57.83  | b2b13b14y9y11°y11y12°y12y13                                                | 1664.81 | 61.590  | 17155  | 3 | 555.61  | -8.14  |
| [P66764]METK_SALTY S-adenosylmethionine synthetase | 5  |                                       | EFFDLRPYGLIQMLDLLHPIYK                         | 331 | 22 | 9  | 45.15  | b7b9b11b12y1y2y4y5y22                                                      | 2721.41 | 121.384 | 13939  | 4 | 681.11  | -12.74 |
| [P66764]METK_SALTY S-adenosylmethionine synthetase | 6  |                                       | VPAEQLILLVR                                    | 320 | 11 | 6  | 37.8   | b2b5y2y5y8y9                                                               | 1250.78 | 83.259  | 9289   | 2 | 625.90  | -0.10  |
| [P66764]METK_SALTY S-adenosylmethionine synthetase | 7  | Carbamidomethyl+C(1)                  | CEIQVSYAIGVAEPTSIMVETFGTEK                     | 294 | 26 | 5  | 18.95  | b4b11*b11b13y13                                                            | 2859.36 | 93.617  | 8670   | 3 | 953.79  | -6.49  |
| [P66764]METK_SALTY S-adenosylmethionine synthetase | 8  |                                       | ADPLEQGAGDQGLMFGYATNETDVLMPAPITYAHR            | 109 | 35 | 3  | 16.75  | y5y7y9                                                                     | 3749.78 | 90.867  | 7552   | 3 | 1250.60 | 6.32   |
| [P66764]METK_SALTY S-adenosylmethionine synthetase | 9  |                                       | IVGIDAVVLSTQHAEDIDQK                           | 177 | 20 | 6  | 34.59  | b3y3y5y13*y13y18                                                           | 2151.11 | 72.294  | 7052   | 3 | 717.71  | -6.92  |
| [P66764]METK_SALTY S-adenosylmethionine synthetase | 10 |                                       | TGMVLVGGEITTSAWVDIEEITR                        | 47  | 23 | 4  | 13.48  | b12°b12y8y10                                                               | 2477.28 | 79.885  | 2914   | 5 | 496.26  | 8.67   |
| [P66764]METK_SALTY S-adenosylmethionine synthetase | 11 |                                       | IIVDTYGGMAR                                    | 246 | 11 | 4  | 32.05  | y4y7°y7y8                                                                  | 1195.60 | 41.197  | 1549   | 2 | 598.31  | -7.86  |
| [P66764]METK_SALTY S-adenosylmethionine synthetase | 12 | Carbamidomethyl+C(20)                 | NTVREIGYVHSDMGFDANSCAVLSAIGK                   | 70  | 28 | 4  | 12     | b27y11y15°y15                                                              | 3011.45 | 94.916  | 214102 | 3 | 1004.49 | 4.05   |
| [P66764]METK_SALTY S-adenosylmethionine synthetase | 13 |                                       | QSPDINQGVDRADPLEQGAGDQGLMFGYATNETDVLMPAPITYAHR | 98  | 46 | 8  | 30.97  | b3b5b7b9y3y7y9y10                                                          | 4959.37 | 88.150  | 26675  | 4 | 1240.60 | 8.66   |
| [P66764]METK_SALTY S-adenosylmethionine synthetase | 14 |                                       | SAAYAARYVAK                                    | 273 | 11 | 3  | 25.06  | b6b10y8                                                                    | 1170.64 | 43.335  | 22888  | 2 | 585.82  | 12.72  |
| [P66764]METK_SALTY S-adenosylmethionine synthetase | 15 | Carbamidomethyl+C(18)                 | FFINPTGRFVIGGPMGDCGLTGR                        | 222 | 23 | 7  | 35.27  | b4b5b7°b7b15y6y20                                                          | 2469.19 | 80.545  | 19176  | 3 | 823.74  | -10.38 |
| [P66764]METK_SALTY S-adenosylmethionine synthetase | 16 |                                       | MAKHLFTSESVSEGHPPDK                            | 0   | 18 | 5  | 33.93  | b9b15y12y13y15                                                             | 1999.98 | 79.129  | 12510  | 3 | 667.33  | 13.79  |
| [P66764]METK_SALTY S-adenosylmethionine synthetase | 17 |                                       | IIVDTYGGMARHGGGAFSGK                           | 246 | 20 | 6  | 33.34  | b7b10b12b13y8°y8                                                           | 1994.00 | 90.912  | 2655   | 3 | 665.34  | 4.29   |
| [P66764]METK_SALTY S-adenosylmethionine synthetase | 18 | Carbamidomethyl+C(1); Oxidation+M(18) | CEIQVSYAIGVAEPTSIMVETFGTEK                     | 294 | 26 | 4  | 16.46  | b6b12y11y14                                                                | 2875.35 | 75.881  | 5290   | 3 | 959.12  | -8.58  |
| [P66764]METK_SALTY S-adenosylmethionine synthetase | 19 | Oxidation+M(3)                        | TGMVLVGGEITTSAWVDIEEITR                        | 47  | 23 | 3  | 13.48  | b5b13y3                                                                    | 2493.25 | 68.779  | 1775   | 2 | 1247.13 | -3.23  |
| [P66764]METK_SALTY S-adenosylmethionine synthetase | 20 |                                       | SLQEAVMEEIHKPILPSE                             | 197 | 18 | 0  | 7.54   |                                                                            | 2026.05 | 110.799 | 3261   | 3 | 676.02  | -11.99 |
| [P0AA28]THIO_SALTY Thioredoxin-1                   | 1  |                                       | MIAPILDEIADEYQGK                               | 37  | 16 | 17 | 149.94 | b2b3b8y2y3*y3y4y5y6y8y9°y9y10y11y13y14y16                                  | 1805.91 | 93.414  | 240653 | 2 | 903.46  | 5.00   |
| [P0AA28]THIO_SALTY Thioredoxin-1                   | 2  |                                       | LNIDQNPGTAPK                                   | 58  | 12 | 27 | 170.71 | b2*b2b4*b4b5*b5b6°b6*b6b7*b7b10y1y2y4y5y6y7y8*y8y9°y9*y9y10°y10y11y12      | 1267.65 | 38.303  | 126813 | 2 | 634.33  | -8.86  |
| [P0AA28]THIO_SALTY Thioredoxin-1                   | 3  |                                       | GIPTLLLFK                                      | 74  | 9  | 10 | 76.65  | b2b3y1y2y3y4y5y6y7y9                                                       | 1001.63 | 90.210  | 71876  | 2 | 501.32  | -10.91 |
| [P0AA28]THIO_SALTY Thioredoxin-1                   | 4  |                                       | IIHLTDDSFDTDVLK                                | 4   | 15 | 9  | 96.15  | b3b6y3y5y6y10y11y12y13                                                     | 1731.85 | 71.078  | 26898  | 3 | 577.96  | -16.99 |

|                                      |    |                                             |                                     |     |    |    |        |                                                                        |         |        |        |   |         |        |
|--------------------------------------|----|---------------------------------------------|-------------------------------------|-----|----|----|--------|------------------------------------------------------------------------|---------|--------|--------|---|---------|--------|
| P0AA28 THIO_SALTY Thioredoxin-1      | 5  |                                             | MIAPILDEIADEYQGKLTVAK               | 37  | 21 | 6  | 32.3   | b3y12*y12y16y18y19                                                     | 2318.22 | 94.471 | 47606  | 3 | 773.41  | -4.63  |
| P0AA28 THIO_SALTY Thioredoxin-1      | 6  |                                             | SDKIIHLTDDSFDTDVLK                  | 1   | 18 | 3  | 25.07  | y7y11y12                                                               | 2062.02 | 67.239 | 39039  | 3 | 688.01  | -5.68  |
| P0AA28 THIO_SALTY Thioredoxin-1      | 7  | Oxidation+M(1)                              | MIAPILDEIADEYQGK                    | 37  | 16 | 5  | 42.92  | b5y3y6y12y14                                                           | 1821.89 | 84.995 | 1689   | 2 | 911.45  | -2.28  |
| P0AA28 THIO_SALTY Thioredoxin-1      | 8  |                                             | GIPTLLLFK                           | 74  | 9  | 0  | 1.51   |                                                                        | 983.64  | 90.207 | 1527   | 2 | 492.32  | 13.71  |
| O33921 AGP_SALTY Glucose-1-phohatase | 1  |                                             | TPIGGQLVFQR                         | 335 | 11 | 10 | 89.96  | b2b4b5y2y3y5y7y8y9y11                                                  | 1215.68 | 61.161 | 94470  | 2 | 608.34  | -3.61  |
| O33921 AGP_SALTY Glucose-1-phohatase | 2  |                                             | MGTMDPTFNPVITDDSAAFR                | 141 | 20 | 20 | 149.68 | b1b3*b3b5b12y1y2y3y4y5y6y7y9y11y12y13*y13y15y16y20                     | 2186.01 | 78.405 | 92644  | 2 | 1093.51 | 7.37   |
| O33921 AGP_SALTY Glucose-1-phohatase | 3  | Carbamidomethyl+C(14)                       | EWLVQAQGLIPSGECPAPDTVYAYANSLQR      | 87  | 29 | 23 | 133.02 | b3*b3b4b5b6b7*b7*b7b9*b9b14b16y2y3y6y9y10y13*y13y15y20y21y29           | 3205.58 | 93.702 | 57278  | 3 | 1069.20 | 5.64   |
| O33921 AGP_SALTY Glucose-1-phohatase | 4  |                                             | IEYVYQSAR                           | 358 | 9  | 11 | 76.65  | b2b3y2y3y5y6y7y8*y8y9*y9                                               | 1128.56 | 42.203 | 53654  | 2 | 564.79  | -3.03  |
| O33921 AGP_SALTY Glucose-1-phohatase | 5  |                                             | DTFSANYQQEPGVQGPLK                  | 208 | 18 | 7  | 33.93  | b10b13y2y8y12y13y18                                                    | 1978.97 | 56.451 | 43523  | 2 | 989.99  | 7.83   |
| O33921 AGP_SALTY Glucose-1-phohatase | 6  | Carbamidomethyl+C(14)                       | LLEQITHYQDSPCK                      | 182 | 15 | 6  | 41.65  | y2y5y8y9y10y15                                                         | 1818.85 | 51.180 | 43461  | 3 | 606.95  | -13.02 |
| O33921 AGP_SALTY Glucose-1-phohatase | 7  |                                             | APLANNGSVLAQSTPNAWPAWDVPGGQLTTK     | 43  | 31 | 14 | 71.79  | b2b3b4b8b9*b9b18y3y8*y8y9y13y14y31                                     | 3161.61 | 83.524 | 35013  | 3 | 1054.54 | 4.09   |
| O33921 AGP_SALTY Glucose-1-phohatase | 8  |                                             | SQLHLDSEYK                          | 172 | 10 | 10 | 74.02  | b7b8*b8y2y4*y4y6y7y8y10                                                | 1219.59 | 39.808 | 24346  | 2 | 610.30  | -6.21  |
| O33921 AGP_SALTY Glucose-1-phohatase | 9  | Carbamidomethyl+C(14)                       | LLEQITHYQDSPCKEK                    | 182 | 17 | 6  | 37.36  | b2b8y6y7y11y15                                                         | 2075.99 | 47.463 | 17148  | 3 | 692.67  | -6.70  |
| O33921 AGP_SALTY Glucose-1-phohatase | 10 |                                             | NGYQDSLFTSPTVAR                     | 266 | 15 | 4  | 30.4   | b3b4b11y14                                                             | 1655.79 | 72.289 | 3522   | 3 | 552.60  | -4.50  |
| O33921 AGP_SALTY Glucose-1-phohatase | 11 |                                             | VTVLVGHDSNIASLLTALDFKPYQLHDQYER     | 304 | 31 | 24 | 141.2  | b4*b4b10b12*b12*b12b13*b13y3y4*y4*y4y5*y5y6y7y10y12y14y17y18y19y20*y20 | 3542.77 | 95.692 | 187194 | 5 | 709.36  | -17.37 |
| O33921 AGP_SALTY Glucose-1-phohatase | 12 |                                             | NVAAPLVK                            | 281 | 8  | 4  | 55.24  | y3y4y5y6                                                               | 811.49  | 39.706 | 44228  | 2 | 406.25  | -17.60 |
| O33921 AGP_SALTY Glucose-1-phohatase | 13 | Carbamidomethyl+C(16)                       | TVATAQFFITGAFPGCDIPVHHQEK           | 116 | 25 | 4  | 19.53  | b6b12b15y10                                                            | 2771.33 | 83.061 | 7053   | 3 | 924.45  | -11.72 |
| O33921 AGP_SALTY Glucose-1-phohatase | 14 |                                             | GGVLEVYMGHYTR                       | 74  | 13 | 5  | 44.42  | b7b9y5y7y10                                                            | 1481.75 | 70.724 | 3341   | 3 | 494.59  | 20.76  |
| O33921 AGP_SALTY Glucose-1-phohatase | 15 | Carbamidomethyl+C(2); Carbamidomethyl+C(10) | GCPVDANGFCPLDKFDNMNTAAK             | 389 | 24 | 8  | 62.47  | b4y3y4y6y10y14y20y22                                                   | 2641.18 | 78.315 | 97133  | 3 | 881.07  | -1.02  |
| O33921 AGP_SALTY Glucose-1-phohatase | 16 | Carbamidomethyl+C(8); Carbamidomethyl+C(16) | VTLELKGCPVDANGFCPLDK                | 383 | 20 | 5  | 26.08  | b13y6*y6y8y9                                                           | 2233.08 | 67.479 | 92706  | 3 | 745.03  | -10.39 |
| O33921 AGP_SALTY Glucose-1-phohatase | 17 |                                             | LKNGYQDSLFTSPTVAR                   | 264 | 17 | 6  | 46.61  | b6b9b10y4y6y7                                                          | 1896.96 | 58.318 | 44804  | 3 | 632.99  | -11.65 |
| O33921 AGP_SALTY Glucose-1-phohatase | 18 |                                             | ARSQLHLDSEYK                        | 170 | 12 | 5  | 23.01  | b9*b9y4*y4y11                                                          | 1446.71 | 75.958 | 26053  | 2 | 723.86  | -14.34 |
| O33921 AGP_SALTY Glucose-1-phohatase | 19 |                                             | HNLRAPLANNGSVLAQSTPNAWPAWDVPGGQLTTK | 39  | 35 | 5  | 24.72  | b12b22y12y13*y13                                                       | 3681.86 | 77.441 | 22196  | 4 | 921.22  | -7.63  |
| O33921 AGP_SALTY Glucose-1-phohatase | 20 |                                             | VGNSLVDRAFTLQYYEGFPMQVAVGGIHTDRQWK  | 226 | 34 | 3  | 11.12  | b10b12y6                                                               | 3928.85 | 84.235 | 12242  | 3 | 1310.29 | -6.28  |
| O33921 AGP_SALTY Glucose-1-phohatase | 21 | Oxidation+M(19)                             | VGNSLVDRAFTLQYYEGFPMQVAVGGIHTDR     | 226 | 31 | 4  | 16.71  | b4b8b14y6                                                              | 3502.63 | 84.062 | 14553  | 4 | 876.41  | -1.32  |
| O33921 AGP_SALTY Glucose-1-phohatase | 22 |                                             | LHLDESYK                            | 174 | 8  | 0  | 1.89   |                                                                        | 1004.49 | 39.844 | 3449   | 2 | 502.75  | -14.10 |

|                                                      |    |                                             |                                            |     |    |    |        |                                                        |         |         |        |   |         |        |
|------------------------------------------------------|----|---------------------------------------------|--------------------------------------------|-----|----|----|--------|--------------------------------------------------------|---------|---------|--------|---|---------|--------|
| O33921 AGP_SALTY Glucose-1-phohatase                 | 23 |                                             | LLEQITHY                                   | 182 | 8  | 0  | 4.53   |                                                        | 1016.55 | 47.425  | 1563   | 2 | 508.78  | 12.25  |
| Q8ZKP7 TPIS_SALTY Triosephohate isomerase            | 1  |                                             | ADAFAVIVK                                  | 238 | 9  | 5  | 46.59  | b6y5y6y7y9                                             | 933.53  | 62.427  | 43919  | 2 | 467.27  | -11.05 |
| Q8ZKP7 TPIS_SALTY Triosephohate isomerase            | 2  |                                             | TQGAAAFEGAVIAYEPVWAIGTG K                  | 152 | 24 | 9  | 29.76  | b2*b2b3°b3b8b11b12y4y24                                | 2407.25 | 93.561  | 38301  | 2 | 1204.13 | 9.43   |
| Q8ZKP7 TPIS_SALTY Triosephohate isomerase            | 3  |                                             | SATPAQAQAVHK                               | 176 | 12 | 17 | 112.62 | b2b3°b3b7°b7y1y2y3y4y5*y5y6y7*y7y8y9y12                | 1208.63 | 18.896  | 30944  | 2 | 604.82  | -6.97  |
| Q8ZKP7 TPIS_SALTY Triosephohate isomerase            | 4  |                                             | DIGAQYIIIGHSER                             | 84  | 14 | 4  | 27.74  | b2y3y4y6                                               | 1571.81 | 61.632  | 11861  | 3 | 524.61  | -6.60  |
| Q8ZKP7 TPIS_SALTY Triosephohate isomerase            | 5  |                                             | AAAGSHIMLGAQNVDNLNSGAFT GETSAEMLK          | 52  | 32 | 4  | 11.33  | b11y2y9y13                                             | 3204.54 | 100.647 | 1921   | 3 | 1068.85 | -9.60  |
| Q8ZKP7 TPIS_SALTY Triosephohate isomerase            | 6  | Carbamidomethyl+C(8)                        | ELTGVAGCDVAIAPPEMYIDLAK                    | 28  | 23 | 7  | 35.27  | b6b7b9b13y3y10°y10                                     | 2433.23 | 88.205  | 25437  | 2 | 1217.12 | 12.44  |
| Q8ZKP7 TPIS_SALTY Triosephohate isomerase            | 7  | Carbamidomethyl+C(9)                        | EQGLTPVLCIGETEAEENEAGK                     | 117 | 21 | 6  | 25.5   | b4b5°b5*b5b13y5                                        | 2245.11 | 55.942  | 3387   | 4 | 562.03  | 18.60  |
| Q8ZKP7 TPIS_SALTY Triosephohate isomerase            | 8  |                                             | HPLVMGNWK                                  | 2   | 9  | 3  | 31.3   | b7y4y6                                                 | 1081.54 | 39.145  | 2984   | 2 | 541.28  | -16.70 |
| Q8ZKP7 TPIS_SALTY Triosephohate isomerase            | 9  | Carbamidomethyl+C(9); Carbamidomethyl+C(26) | EQGLTPVLCIGETEAEENEAGKTEE VCAR             | 117 | 28 | 16 | 155.8  | y3y4y5°y5y6y7y12y13°y13y16y18y20y21y23y24y26           | 3090.43 | 72.031  | 188968 | 3 | 1030.82 | -0.63  |
| Q8ZKP7 TPIS_SALTY Triosephohate isomerase            | 10 |                                             | TQGAAAFEGAVIAYEPVWAIGTG KSATPAQAQAVHK      | 152 | 36 | 9  | 22.69  | b5b7°b7b11°b11*b11b13°b13*b13                          | 3596.83 | 130.759 | 41916  | 4 | 899.96  | -6.65  |
| Q8ZKP7 TPIS_SALTY Triosephohate isomerase            | 11 |                                             | ADAKIAEQVIIQYGGSVNASAAE LFAQPDIDGALVGGASLK | 196 | 42 | 3  | 10.86  | b5y7y21                                                | 4172.14 | 92.102  | 2887   | 4 | 1043.79 | -1.76  |
| Q8ZKP7 TPIS_SALTY Triosephohate isomerase            | 12 |                                             | TPAQAQAVHK                                 | 178 | 10 | 4  | 30.21  | b3°b3b4b8                                              | 1050.56 | 18.897  | 12218  | 2 | 525.78  | -9.18  |
| Q8ZKP7 TPIS_SALTY Triosephohate isomerase            | 13 |                                             | PAQAQAVHK                                  | 179 | 9  | 9  | 80.79  | b3*b3b4b5*b5b6*b6b7b8                                  | 949.51  | 18.896  | 10568  | 2 | 475.26  | -9.13  |
| Q8ZKP7 TPIS_SALTY Triosephohate isomerase            | 14 |                                             | ATPAQAQAVHK                                | 177 | 11 | 2  | 7.72   | b3°b3                                                  | 1121.60 | 18.896  | 1618   | 2 | 561.31  | -2.39  |
| P0A1Z2 SKP_SALTY Chaperone protein skp               | 1  |                                             | IAIVNMGNLFQQVAQK                           | 23  | 16 | 21 | 115.92 | b2b3b4b6*b6b15y1y2*y2y3y5*y6*y6y7*y7y8y11y12y13y16*y16 | 1773.97 | 89.640  | 278957 | 2 | 887.49  | 3.51   |
| P0A1Z2 SKP_SALTY Chaperone protein skp               | 2  |                                             | TGVSNTLENEFK                               | 39  | 12 | 15 | 112.62 | b2b3b11y2y4y5°y5y6y7y8°y8*y8y9y10y12                   | 1338.66 | 57.273  | 155414 | 2 | 669.83  | 1.19   |
| P0A1Z2 SKP_SALTY Chaperone protein skp               | 3  |                                             | VANDQSIDLVVDANTVAYNSSDV KDITADVLK          | 126 | 32 | 19 | 114.39 | b4*b4b5b6b8b9b11b15b18y1y3y13y14*y14y15y16y25y27y32    | 3392.73 | 89.644  | 102521 | 3 | 1131.58 | 7.05   |
| P0A1Z2 SKP_SALTY Chaperone protein skp               | 4  |                                             | METDLQSK                                   | 59  | 8  | 9  | 41.71  | b2b8y2y4y6°y6y7°y7y8                                   | 951.44  | 26.420  | 86323  | 2 | 476.22  | -9.37  |
| P0A1Z2 SKP_SALTY Chaperone protein skp               | 5  |                                             | AQAFEKDR                                   | 97  | 8  | 10 | 65.76  | b2b5*b5b6y1y2y3y5°y5y6                                 | 964.47  | 17.704  | 5288   | 2 | 482.74  | -10.13 |
| P0A1Z2 SKP_SALTY Chaperone protein skp               | 6  |                                             | VANDQSIDLVVDANTVAYNSSDV K                  | 126 | 24 | 4  | 13.11  | b8b11y11*y11                                           | 2537.24 | 84.149  | 36859  | 3 | 846.42  | 0.48   |
| P0A1Z2 SKP_SALTY Chaperone protein skp               | 7  |                                             | TGVSNTLENEFKGR                             | 39  | 14 | 15 | 115.6  | b3y3y4y6y7°y7*y7y8*y8y9°y9y11°y11*y11y12               | 1551.75 | 52.953  | 175405 | 3 | 517.92  | -14.71 |
| P0A1Z2 SKP_SALTY Chaperone protein skp               | 8  |                                             | KVANDQSIDLVVDANTVAYNSSD VK                 | 125 | 25 | 4  | 22.33  | b6y8°y8y9                                              | 2665.29 | 94.092  | 13313  | 4 | 667.08  | -14.47 |
| P0A1Z2 SKP_SALTY Chaperone protein skp               | 9  |                                             | AAELQKMETDLQSK                             | 53  | 14 | 4  | 19.96  | b5*b5b12y12                                            | 1591.81 | 64.991  | 2748   | 3 | 531.28  | 8.13   |
| P0A1Z2 SKP_SALTY Chaperone protein skp               | 10 | Oxidation+M(6)                              | LEKDVMSQR                                  | 82  | 9  | 4  | 31.3   | b4b6y5*y5                                              | 1121.57 | 62.124  | 1823   | 2 | 561.29  | 11.43  |
| Q8ZKQ1 LSRB_SALTY Autoinducer 2-binding protein lsrB | 1  |                                             | LVGVGFFTSGGNGAQEAGK                        | 35  | 19 | 10 | 42.34  | b2b6b17y1y3y7*y7y15y18y19                              | 1795.92 | 89.641  | 121055 | 3 | 599.31  | 13.80  |

|                                                      |    |                       |                                |     |    |    |        |                                                                     |         |         |        |   |         |        |
|------------------------------------------------------|----|-----------------------|--------------------------------|-----|----|----|--------|---------------------------------------------------------------------|---------|---------|--------|---|---------|--------|
| Q8ZKQ1 LSRB_SALTY Autoinducer 2-binding protein lsrB | 2  |                       | QLGSMLVEMAAHQVDKEK             | 134 | 18 | 11 | 69.66  | b8*b8b10b18y3y4y7y8y9y11y18                                         | 2013.99 | 73.329  | 108616 | 3 | 672.00  | -11.39 |
| Q8ZKQ1 LSRB_SALTY Autoinducer 2-binding protein lsrB | 3  |                       | AYPDLDAIIAPDANALPAAQAEE NLKR   | 209 | 28 | 14 | 104.41 | b7b8b10b14y4y5y6y9y12y18y19y20y23y28                                | 2863.49 | 87.500  | 94270  | 3 | 955.17  | -0.34  |
| Q8ZKQ1 LSRB_SALTY Autoinducer 2-binding protein lsrB | 4  | Carbamidomethyl+C(12) | ILTWSDTKPECR                   | 111 | 13 | 11 | 97.71  | b1b2y2y4y6y8y9y10y11y12y13                                          | 1620.75 | 49.816  | 76082  | 3 | 540.92  | -13.78 |
| Q8ZKQ1 LSRB_SALTY Autoinducer 2-binding protein lsrB | 5  |                       | NMPMNVGDSLDPGIGK               | 284 | 17 | 12 | 77.79  | b2b3b6b12b15b16y2y4y5y11y15y17                                      | 1757.86 | 79.566  | 70979  | 2 | 879.44  | 4.03   |
| Q8ZKQ1 LSRB_SALTY Autoinducer 2-binding protein lsrB | 6  |                       | NNLAIVGFSTPNVMRPYVQR           | 237 | 20 | 20 | 122.31 | b2*b2b3*b3b4*b4b5b10*b10y2*y2y3y5y10y12y14y15y16y17y20              | 2276.19 | 77.715  | 70938  | 3 | 759.40  | -3.11  |
| Q8ZKQ1 LSRB_SALTY Autoinducer 2-binding protein lsrB | 7  |                       | ISQEHPGWEIVTTQFGYNDATK         | 177 | 22 | 9  | 41.13  | b10*b10b11*b11b13y6y12°y12y13                                       | 2521.20 | 72.393  | 61876  | 3 | 841.07  | -1.07  |
| Q8ZKQ1 LSRB_SALTY Autoinducer 2-binding protein lsrB | 8  |                       | SLQTAEGIIK                     | 199 | 10 | 4  | 27.7   | b8y4y7y10                                                           | 1059.59 | 50.798  | 53926  | 2 | 530.30  | -9.33  |
| Q8ZKQ1 LSRB_SALTY Autoinducer 2-binding protein lsrB | 9  |                       | VAFFYSSPTVTDQNQWVK             | 154 | 18 | 8  | 62.83  | b8b12y8y11y12y13y14y18                                              | 2117.05 | 77.449  | 52577  | 2 | 1059.03 | 9.69   |
| Q8ZKQ1 LSRB_SALTY Autoinducer 2-binding protein lsrB | 10 |                       | ISVYVANALLK                    | 273 | 11 | 8  | 66.89  | b1b2y5y6y7y8y10y11                                                  | 1190.70 | 73.297  | 49534  | 2 | 595.86  | -9.02  |
| Q8ZKQ1 LSRB_SALTY Autoinducer 2-binding protein lsrB | 11 |                       | VTVSPNSEQGYHYEAK               | 301 | 16 | 10 | 101.58 | y4y5y7y8*y8y9y10y11y12y16                                           | 1808.82 | 36.147  | 42049  | 3 | 603.61  | -12.15 |
| Q8ZKQ1 LSRB_SALTY Autoinducer 2-binding protein lsrB | 12 |                       | EFGLWDVVQQGK                   | 261 | 12 | 7  | 35.29  | b2°b2b3y5y7y8y12                                                    | 1405.71 | 82.260  | 35489  | 2 | 703.36  | 0.61   |
| Q8ZKQ1 LSRB_SALTY Autoinducer 2-binding protein lsrB | 13 |                       | GNGIVLLPER                     | 317 | 10 | 5  | 34.69  | b2y3y5y6y10                                                         | 1067.61 | 61.192  | 21355  | 2 | 534.31  | -6.40  |
| Q8ZKQ1 LSRB_SALTY Autoinducer 2-binding protein lsrB | 14 |                       | GTVKEFGLWDVVQQGK               | 257 | 16 | 4  | 17.79  | b10b13y5y16                                                         | 1790.92 | 75.794  | 14074  | 3 | 597.64  | -14.65 |
| Q8ZKQ1 LSRB_SALTY Autoinducer 2-binding protein lsrB | 15 |                       | VIFNKDNIDK                     | 327 | 10 | 5  | 29.46  | b7°b7b8*b8y8                                                        | 1205.67 | 77.242  | 5906   | 2 | 603.34  | 14.48  |
| Q8ZKQ1 LSRB_SALTY Autoinducer 2-binding protein lsrB | 16 |                       | VAFFYSSPTVTDQNQWVKEAK          | 154 | 21 | 6  | 22.49  | b6b10b13*b13y12y21                                                  | 2445.18 | 97.616  | 2728   | 3 | 815.73  | -12.88 |
| Q8ZKQ1 LSRB_SALTY Autoinducer 2-binding protein lsrB | 17 |                       | AYPDLDAIIAPDANALPAAQAEE NLK    | 209 | 27 | 3  | 35.87  | b11b12b13                                                           | 2707.36 | 64.572  | 11690  | 3 | 903.13  | -11.90 |
| Q8ZKQ1 LSRB_SALTY Autoinducer 2-binding protein lsrB | 18 |                       | QLGSMLVEMAAHQVDK               | 134 | 16 | 8  | 50.33  | b3b5b8*b8b14y6y14°y14                                               | 1756.91 | 89.642  | 2404   | 3 | 586.31  | 19.52  |
| Q8ZKQ1 LSRB_SALTY Autoinducer 2-binding protein lsrB | 19 |                       | AKISQEHPGWEIVTTQFGYNDAT K      | 175 | 24 | 6  | 22.41  | b12°b12y11*y11y12°y12                                               | 2720.33 | 112.035 | 3744   | 2 | 1360.67 | -1.35  |
| Q8ZKQ1 LSRB_SALTY Autoinducer 2-binding protein lsrB | 20 |                       | SYIINQGTQPKQLGSMLVEMAAHQ VDK   | 124 | 26 | 6  | 37.48  | b9y5y6y7y10*y10                                                     | 2908.39 | 104.393 | 2173   | 4 | 727.85  | -14.02 |
| Q8ZKQ1 LSRB_SALTY Autoinducer 2-binding protein lsrB | 21 | Oxidation+M(5)        | QLGSMLVEMAAHQVDKEK             | 134 | 18 | 9  | 42.31  | b4*b4b6b11b12y8°y8y10*y10                                           | 2030.00 | 66.845  | 3754   | 3 | 677.34  | -1.20  |
| Q8ZKQ1 LSRB_SALTY Autoinducer 2-binding protein lsrB | 22 |                       | EMAAHQVDKEK                    | 141 | 11 | 3  | 13.76  | b5b9°b9                                                             | 1285.61 | 73.299  | 4902   | 2 | 643.31  | -8.36  |
| Q8ZKQ1 LSRB_SALTY Autoinducer 2-binding protein lsrB | 23 | Carbamidomethyl+C(10) | TWSDTKPECR                     | 113 | 11 | 1  | 7.51   | b3                                                                  | 1394.61 | 49.828  | 4834   | 2 | 697.81  | 6.13   |
| P0A1D3 CH60_SALTY 60 kDa chaperonin                  | 1  |                       | GYLSPYFINKPETGAVELESPFILL ADKK | 197 | 29 | 27 | 249.52 | b2b3b4°b4b5b6°b6b7b10y2y3y4y5y6y7y8y9y10y11y12y13y19y23y25y26y27y29 | 3239.69 | 95.310  | 259756 | 4 | 810.68  | -9.50  |
| P0A1D3 CH60_SALTY 60 kDa chaperonin                  | 2  |                       | ANDAAGDGTTTATVLAQSIITEGL K     | 80  | 25 | 21 | 134.39 | b2*b2b3*b3b4°b4*b4b5*b5b7y1y3y4°y4y5y6y7y8y9y10y25                  | 2418.22 | 92.005  | 215507 | 3 | 806.75  | -4.64  |
| P0A1D3 CH60_SALTY 60 kDa chaperonin                  | 3  |                       | EMLPVLEAVAK                    | 231 | 11 | 10 | 68.66  | b2°b2b3b8y2y3y4y6y8y11                                              | 1199.66 | 79.768  | 157888 | 2 | 600.33  | -7.94  |

|                                      |    |                       |                                      |     |    |    |        |                                                                                                                   |         |         |        |   |         |        |
|--------------------------------------|----|-----------------------|--------------------------------------|-----|----|----|--------|-------------------------------------------------------------------------------------------------------------------|---------|---------|--------|---|---------|--------|
| IP0A1D3 CH60_SALTY 60 kDa chaperonin | 4  | Carbamidomethyl+C(18) | SALQYAASVAGLMITTECMVTDL PK           | 501 | 25 | 41 | 275.6  | b2b3°b3b4°b4b5°b5°b5b6°b6°b6b7°b7b8°b8°b8b10°b10°b10b11°b11b12°b12b13b14y2y3y4y5°y5y6°y6y7y8y9y10y11y12°y12y13y25 | 2670.32 | 123.861 | 156664 | 3 | 890.78  | 0.37   |
| IP0A1D3 CH60_SALTY 60 kDa chaperonin | 5  | Carbamidomethyl+C(6)  | QIVLNCGEEPSVVANTVK                   | 452 | 18 | 16 | 108.98 | b3°b3b5b13y1y3y5y6y9y12*y12y13y14y15y18*y18                                                                       | 1957.02 | 61.545  | 110094 | 2 | 979.01  | 4.74   |
| IP0A1D3 CH60_SALTY 60 kDa chaperonin | 6  |                       | AVAAAVEELK                           | 122 | 10 | 14 | 89.59  | b1b2b3y1y2y3°y3y4°y4y5y6y7y8y10                                                                                   | 1000.56 | 47.017  | 108277 | 2 | 500.78  | -10.13 |
| IP0A1D3 CH60_SALTY 60 kDa chaperonin | 7  |                       | GVNVLADAVK                           | 18  | 10 | 9  | 89.59  | b7y1y3y4y5y6y7y8y10                                                                                               | 985.55  | 55.693  | 83058  | 2 | 493.28  | -13.25 |
| IP0A1D3 CH60_SALTY 60 kDa chaperonin | 8  |                       | VVINKDTTTIIDGVGEEAAIQGR              | 322 | 23 | 14 | 123.13 | b10b11b12y2y3*y3y4y5y6y7°y7y8y9y13                                                                                | 2399.27 | 66.986  | 79299  | 3 | 800.43  | -5.09  |
| IP0A1D3 CH60_SALTY 60 kDa chaperonin | 9  | Carbamidomethyl+C(6)  | ALSVPCSDSK                           | 132 | 10 | 12 | 89.59  | b2b3°b3y1y2y3y4y5y6y7y8y10                                                                                        | 1063.50 | 35.005  | 73324  | 2 | 532.25  | -6.08  |
| IP0A1D3 CH60_SALTY 60 kDa chaperonin | 10 |                       | GGDGNYGYNAAATEEYGNMIDMG ILDPTK       | 470 | 28 | 12 | 48.87  | b2b5°b5y1y2y3y4y5y8y11y13y28                                                                                      | 2966.32 | 88.233  | 71153  | 2 | 1483.66 | 12.84  |
| IP0A1D3 CH60_SALTY 60 kDa chaperonin | 11 |                       | SFGAPTITK                            | 42  | 9  | 12 | 63.12  | b2b3°b3y1y2°y2y3y5°y5y6y7y9                                                                                       | 921.49  | 44.636  | 68392  | 2 | 461.25  | -14.44 |
| IP0A1D3 CH60_SALTY 60 kDa chaperonin | 12 |                       | LIAEAMDK                             | 160 | 8  | 5  | 41.71  | y2y4y6y7y8                                                                                                        | 890.45  | 38.710  | 50787  | 2 | 445.73  | -12.82 |
| IP0A1D3 CH60_SALTY 60 kDa chaperonin | 13 |                       | AVAAGMNPMDLK                         | 105 | 12 | 7  | 37.21  | b2b3b7y1y7y8y12                                                                                                   | 1217.60 | 58.047  | 48362  | 2 | 609.30  | -1.20  |
| IP0A1D3 CH60_SALTY 60 kDa chaperonin | 14 |                       | AMEAPLR                              | 445 | 7  | 6  | 41.34  | b7y4y5°y5y6y7                                                                                                     | 787.40  | 36.399  | 40466  | 2 | 394.21  | -10.77 |
| IP0A1D3 CH60_SALTY 60 kDa chaperonin | 15 |                       | VGKEGVITVEDGTGLQDELDDVVE GMQFDR      | 168 | 29 | 4  | 11.8   | b2b13y5y10                                                                                                        | 3135.50 | 72.268  | 40243  | 4 | 784.63  | -4.52  |
| IP0A1D3 CH60_SALTY 60 kDa chaperonin | 16 |                       | ATLEDLGQAK                           | 311 | 10 | 10 | 72.26  | b5°b5b8y1y4y6y7°y7y8y10                                                                                           | 1045.55 | 43.894  | 37909  | 2 | 523.28  | -6.77  |
| IP0A1D3 CH60_SALTY 60 kDa chaperonin | 17 |                       | GQNEQNNGVIK                          | 430 | 11 | 8  | 42.57  | b2°b2b3y7y8°y8y9y11                                                                                               | 1201.58 | 26.767  | 34829  | 2 | 601.29  | -3.05  |
| IP0A1D3 CH60_SALTY 60 kDa chaperonin | 18 |                       | VEDALHATR                            | 395 | 9  | 11 | 76.65  | b1b2b4y1y2y3y4y5y7y8y9                                                                                            | 1011.51 | 25.745  | 34715  | 2 | 506.26  | -9.65  |
| IP0A1D3 CH60_SALTY 60 kDa chaperonin | 19 |                       | AIAQVGTISANSDETVGK                   | 142 | 18 | 7  | 16.15  | b1b5°b5y10°y10y13*y13                                                                                             | 1760.90 | 72.364  | 23490  | 2 | 880.95  | -3.60  |
| IP0A1D3 CH60_SALTY 60 kDa chaperonin | 20 |                       | SFGAPTITKDGVSVAR                     | 42  | 16 | 3  | 24.32  | b7b8y7                                                                                                            | 1605.85 | 54.771  | 2173   | 3 | 535.95  | -6.39  |
| IP0A1D3 CH60_SALTY 60 kDa chaperonin | 21 |                       | LAGGVAVIK                            | 371 | 9  | 6  | 80.91  | b5b6y3y4y7y8                                                                                                      | 827.52  | 44.714  | 69024  | 2 | 414.26  | -18.66 |
| IP0A1D3 CH60_SALTY 60 kDa chaperonin | 22 |                       | DTTTIIDGVGEEAAIQGR                   | 327 | 18 | 4  | 25.7   | b7b12b14y10                                                                                                       | 1845.91 | 99.453  | 63576  | 3 | 615.97  | -7.34  |
| IP0A1D3 CH60_SALTY 60 kDa chaperonin | 23 |                       | GYLSPYFINKPETGAVELESPFILL ADK        | 197 | 28 | 3  | 12     | b14y3y18                                                                                                          | 3111.58 | 106.518 | 2450   | 4 | 778.65  | -14.99 |
| IP0A1D3 CH60_SALTY 60 kDa chaperonin | 24 |                       | EIELEDKFENMGAMVK                     | 58  | 17 | 16 | 122.12 | b3°b3b5y4*y4y5y6y7y8y10*y10y11°y11*y11y12y15                                                                      | 2010.92 | 72.969  | 157523 | 3 | 670.98  | -13.54 |
| IP0A1D3 CH60_SALTY 60 kDa chaperonin | 25 |                       | FENMGAMVKEVASK                       | 65  | 15 | 4  | 37.67  | b4b5b7b10                                                                                                         | 1668.78 | 34.984  | 78127  | 3 | 556.93  | -14.48 |
| IP0A1D3 CH60_SALTY 60 kDa chaperonin | 26 |                       | LIAEAMDKVGK                          | 160 | 11 | 6  | 66.89  | y3y4y7y8°y8y9                                                                                                     | 1174.64 | 45.450  | 36617  | 2 | 587.82  | -6.75  |
| IP0A1D3 CH60_SALTY 60 kDa chaperonin | 27 |                       | AMLQDIATLTGGTVISEEIGMELE KATLEDLGQAK | 286 | 35 | 20 | 114.59 | b3b4b5b6°b6b7b10b13°b13°b13y4y5y7*y7y9*y9y10y19y25y29                                                             | 3675.88 | 121.839 | 36612  | 3 | 1225.97 | 3.25   |
| IP0A1D3 CH60_SALTY 60 kDa chaperonin | 28 | Carbamidomethyl+C(21) | VTRSALQYAASVAGLMITTECMV TDLPK        | 498 | 28 | 4  | 15.51  | b11b20y11y16                                                                                                      | 3026.51 | 114.051 | 28636  | 3 | 1009.51 | -8.95  |
| IP0A1D3 CH60_SALTY 60 kDa chaperonin | 29 |                       | IADLKGQNEQNNGVIK                     | 425 | 16 | 3  | 17.79  | b13y4y11                                                                                                          | 1741.91 | 53.684  | 19535  | 2 | 871.46  | 0.14   |

|                                     |    |                                           |                             |     |    |    |        |                                               |         |         |        |   |        |        |
|-------------------------------------|----|-------------------------------------------|-----------------------------|-----|----|----|--------|-----------------------------------------------|---------|---------|--------|---|--------|--------|
| P0A1D3 CH60_SALTY 60 kDa chaperonin | 30 | Carbamidomethyl+C(16)                     | AVAAAVEELKALSVPSCDSK        | 122 | 20 | 3  | 14.89  | b18y6y18                                      | 2045.04 | 71.732  | 17939  | 3 | 682.35 | -7.04  |
| P0A1D3 CH60_SALTY 60 kDa chaperonin | 31 |                                           | AIAQVGTISANSDETVGKLI AEAMDK | 142 | 26 | 4  | 18.95  | b4y3y5y7                                      | 2632.36 | 91.464  | 13312  | 3 | 878.13 | 4.36   |
| P0A1D3 CH60_SALTY 60 kDa chaperonin | 32 | Phosphoryl STY(13)                        | SFGAPTITKDGVSVAR            | 42  | 16 | 5  | 36.68  | b11b15y5y11y12                                | 1685.80 | 93.650  | 4163   | 2 | 843.40 | -8.11  |
| P0A1D3 CH60_SALTY 60 kDa chaperonin | 33 | Oxidation+M(9)                            | AVAAGMNPMDLK                | 105 | 12 | 5  | 55.81  | b4b5b6b7y5                                    | 1233.59 | 57.631  | 197463 | 3 | 411.87 | -8.11  |
| P0A1D3 CH60_SALTY 60 kDa chaperonin | 34 | Oxidation+M(22)                           | EGVITVEDGTGLQDELDVVEGMQFDR  | 171 | 26 | 5  | 28.45  | b3b4b9b14y6                                   | 2867.32 | 113.250 | 77064  | 3 | 956.45 | -0.94  |
| P0A1D3 CH60_SALTY 60 kDa chaperonin | 35 | Carbamidomethyl+C(18)<br>;Oxidation+M(13) | SALQYAASVAGLMITTECMVTDLPK   | 501 | 25 | 6  | 27.99  | b7b8b12y4y11°y11                              | 2686.35 | 115.299 | 8885   | 3 | 896.12 | 14.72  |
| P0A1D3 CH60_SALTY 60 kDa chaperonin | 36 | Oxidation+M(9)                            | AVAAGMNPMDLKR               | 105 | 13 | 5  | 54.63  | b3b5b8b12y9                                   | 1389.69 | 50.560  | 2632   | 3 | 463.90 | -8.70  |
| P0A1D3 CH60_SALTY 60 kDa chaperonin | 37 |                                           | EDALHATR                    | 396 | 8  | 1  | 9.02   | b6                                            | 912.44  | 25.741  | 24038  | 2 | 456.73 | -9.70  |
| P0A1D3 CH60_SALTY 60 kDa chaperonin | 38 |                                           | AAAVEELK                    | 124 | 8  | 1  | 8.42   | b6                                            | 830.45  | 47.009  | 16483  | 1 | 830.45 | -11.10 |
| P0A1D3 CH60_SALTY 60 kDa chaperonin | 39 |                                           | GAPTITK                     | 44  | 7  | 0  | 1.51   |                                               | 687.40  | 44.637  | 13482  | 1 | 687.40 | -11.45 |
| P0A1D3 CH60_SALTY 60 kDa chaperonin | 40 |                                           | AIAQVGTISANSDETVG           | 142 | 17 | 1  | 7.29   | y6                                            | 1632.80 | 72.369  | 12455  | 2 | 816.90 | -6.43  |
| P0A1D3 CH60_SALTY 60 kDa chaperonin | 41 |                                           | NVLADAVK                    | 20  | 8  | 2  | 8.42   | b6*b6                                         | 829.47  | 55.669  | 10008  | 1 | 829.47 | -3.46  |
| P0A1D3 CH60_SALTY 60 kDa chaperonin | 42 |                                           | DALHATR                     | 397 | 7  | 1  | 9.02   | b5                                            | 783.40  | 25.717  | 7210   | 2 | 392.21 | -7.71  |
| P0A1D3 CH60_SALTY 60 kDa chaperonin | 43 | Carbamidomethyl+C(4)                      | SVPSCDSK                    | 134 | 8  | 0  | 1.89   |                                               | 879.39  | 35.001  | 3757   | 1 | 879.39 | -0.14  |
| P0A1D3 CH60_SALTY 60 kDa chaperonin | 44 |                                           | EMLPVLEAVAK                 | 231 | 11 | 0  | 2.26   |                                               | 1181.65 | 79.743  | 8276   | 2 | 591.33 | -6.10  |
| P00924 ENO1_YEAST Enolase 1         | 1  |                                           | NVNDVIAPAFVK                | 67  | 12 | 18 | 145.42 | b2*b2b4*b4b5b6°b6b7y2y3y5y6y7y8y9y10*y10y12   | 1286.70 | 65.886  | 103888 | 2 | 643.86 | -5.03  |
| P00924 ENO1_YEAST Enolase 1         | 2  |                                           | SIVPSGASTGVHEALEMR          | 32  | 18 | 17 | 126.37 | b2y1y2y4y6°y6y7°y7y8y9y10y13y14°y14y15°y15y16 | 1840.90 | 60.886  | 80222  | 3 | 614.31 | -11.21 |
| P00924 ENO1_YEAST Enolase 1         | 3  |                                           | VNQIGTLESSEIK               | 346 | 12 | 9  | 80.79  | b2*b2b3y3y5y6y7y8y9y12                        | 1288.71 | 54.163  | 67167  | 2 | 644.86 | -3.13  |
| P00924 ENO1_YEAST Enolase 1         | 4  |                                           | TFAEALR                     | 178 | 7  | 5  | 41.34  | b1b6y3y5y7                                    | 807.42  | 45.096  | 57211  | 2 | 404.22 | -13.91 |
| P00924 ENO1_YEAST Enolase 1         | 5  |                                           | TAGIQIVADDLTVTNPK           | 312 | 17 | 11 | 86.32  | b9b14y2y3y4y6y9y10y11y13y17                   | 1755.95 | 72.225  | 45227  | 2 | 878.48 | 0.07   |
| P00924 ENO1_YEAST Enolase 1         | 6  |                                           | IEEELGDNAVFAGENFHHGDK       | 415 | 21 | 7  | 39.7   | b12y1y9y10y11y19y21                           | 2328.03 | 57.179  | 37582  | 4 | 582.76 | -9.96  |
| P00924 ENO1_YEAST Enolase 1         | 7  |                                           | AVDDFLISLDGTANK             | 88  | 15 | 12 | 60.77  | b2b5b6b12b14y1y5*y5y6°y6y8y15                 | 1578.80 | 82.001  | 35655  | 2 | 789.90 | 0.62   |
| P00924 ENO1_YEAST Enolase 1         | 8  |                                           | WLTGPQLADLYHSLMK            | 272 | 16 | 10 | 76.67  | b12*b12y2y4y5y6y12°y12y13y14                  | 1872.94 | 95.632  | 23886  | 3 | 624.99 | -13.49 |
| P00924 ENO1_YEAST Enolase 1         | 9  |                                           | AADALLK                     | 338 | 8  | 9  | 109.35 | b5b6°b6b7y3y4y5y6y7                           | 814.49  | 53.318  | 81592  | 2 | 407.75 | -19.41 |
| P00924 ENO1_YEAST Enolase 1         | 10 |                                           | HLADLSK                     | 132 | 7  | 3  | 38.33  | b4b5y4                                        | 783.43  | 25.372  | 33282  | 2 | 392.22 | -11.76 |
| P00924 ENO1_YEAST Enolase 1         | 11 |                                           | YDLDFK                      | 258 | 6  | 2  | 27.43  | b3y3                                          | 800.39  | 99.388  | 10692  | 1 | 800.39 | 7.63   |
| P00924 ENO1_YEAST Enolase 1         | 12 |                                           | GNPTVEVELTTEK               | 15  | 13 | 4  | 35.82  | b3*b3b4b5                                     | 1416.69 | 65.894  | 3595   | 3 | 472.90 | -20.42 |
| P00924 ENO1_YEAST Enolase 1         | 13 |                                           | TGAPAR                      | 397 | 6  | 1  | 13.9   | y5                                            | 572.31  | 27.526  | 3384   | 1 | 572.31 | -0.96  |
| P00924 ENO1_YEAST Enolase 1         | 14 |                                           | YPIVSIEDPFAEDDWEAWSHFFK     | 289 | 23 | 4  | 13.48  | b10y5y7°y7                                    | 2828.33 | 124.479 | 2914   | 3 | 943.45 | 15.37  |
| P00924 ENO1_YEAST Enolase 1         | 15 |                                           | AVDDFLISLDGTANKSK           | 88  | 17 | 5  | 23.83  | b5b11y10y15°y15                               | 1793.91 | 64.859  | 149880 | 2 | 897.46 | -8.44  |
| P00924 ENO1_YEAST Enolase 1         | 16 |                                           | YDLDFKNPNSDK                | 258 | 12 | 3  | 26.99  | b6y3y4                                        | 1455.69 | 81.976  | 9059   | 2 | 728.35 | 8.39   |
| P00924 ENO1_YEAST Enolase 1         | 17 |                                           | DQKAVDDFLISLDGTANK          | 85  | 18 | 5  | 27.46  | b12y5y6°y6y13                                 | 1949.98 | 72.331  | 4829   | 3 | 650.67 | -0.25  |

|                                                           |    |                      |                                       |     |    |    |        |                                                |         |         |        |   |         |        |
|-----------------------------------------------------------|----|----------------------|---------------------------------------|-----|----|----|--------|------------------------------------------------|---------|---------|--------|---|---------|--------|
| P00924 ENO1_YEAST Enolase 1                               | 18 |                      | TFAEALRIGSEVYHNLK                     | 178 | 17 | 4  | 16.91  | b4b16y9*y9                                     | 1948.03 | 88.200  | 4286   | 3 | 650.02  | 2.26   |
| P00924 ENO1_YEAST Enolase 1                               | 19 |                      | SVYDSRGNPTVEVELTTEK                   | 9   | 19 | 4  | 21.55  | b6b12y4y10                                     | 2124.06 | 47.893  | 2387   | 3 | 708.69  | 6.90   |
| P00924 ENO1_YEAST Enolase 1                               | 20 |                      | IEEELGDNAVFAGENFHGDKL                 | 415 | 22 | 8  | 60.6   | b5y6y8*y8y9y10y11y13                           | 2441.14 | 82.477  | 2066   | 3 | 814.38  | -0.30  |
| P00924 ENO1_YEAST Enolase 1                               | 21 | Oxidation+M(15)      | WLTGSQLADLYHSLMKR                     | 272 | 17 | 5  | 24.32  | b4*b4b7*b7b10                                  | 2045.08 | 107.776 | 8120   | 3 | 682.36  | 6.63   |
| P00924 ENO1_YEAST Enolase 1                               | 22 | Oxidation+M(15)      | WLTGSQLADLYHSLMK                      | 272 | 16 | 7  | 36.68  | b6b14*b14y6y13*y13y14                          | 1888.96 | 86.886  | 4452   | 3 | 630.33  | -1.16  |
| P00924 ENO1_YEAST Enolase 1                               | 23 |                      | PSGASTGVHEALEMR                       | 35  | 15 | 3  | 25.07  | b8b9b13                                        | 1541.74 | 60.889  | 4990   | 2 | 771.37  | 3.09   |
| O54297 RS4_SALTY 30S ribosomal protein S4                 | 1  |                      | VVNIASYQVSPNDVVSIR                    | 128 | 18 | 18 | 135.95 | b2b3b8*b8b9b15b17y3y4y5y8*y8y9y10y13*y13y14y18 | 1960.06 | 71.962  | 62732  | 2 | 980.53  | 4.48   |
| O54297 RS4_SALTY 30S ribosomal protein S4                 | 2  |                      | AALELAEQR                             | 156 | 9  | 10 | 77.9   | b3b4*b4y4*y4y5y6*y6y7y9                        | 1000.53 | 42.968  | 56202  | 2 | 500.77  | -10.25 |
| O54297 RS4_SALTY 30S ribosomal protein S4                 | 3  |                      | REGTDLFLK                             | 13  | 9  | 5  | 31.3   | b5b6*b6y4y9                                    | 1078.59 | 50.934  | 13981  | 2 | 539.80  | -3.40  |
| O54297 RS4_SALTY 30S ribosomal protein S4                 | 4  |                      | IEQAPGQHGAR                           | 33  | 11 | 3  | 28.07  | b7y8y9                                         | 1163.59 | 30.664  | 2001   | 3 | 388.53  | -4.62  |
| O54297 RS4_SALTY 30S ribosomal protein S4                 | 5  |                      | LDNVVYR                               | 97  | 7  | 4  | 41.34  | b3b4*b4b6                                      | 878.46  | 32.421  | 63613  | 2 | 439.74  | -10.14 |
| O54297 RS4_SALTY 30S ribosomal protein S4                 | 6  |                      | EAAR                                  | 77  | 4  | 1  | 13.15  | y3                                             | 446.23  | 31.120  | 30881  | 1 | 446.23  | -11.35 |
| O54297 RS4_SALTY 30S ribosomal protein S4                 | 7  |                      | EKPTWLEVDAGK                          | 165 | 12 | 3  | 23.01  | b5b10y3                                        | 1372.71 | 54.496  | 11456  | 2 | 686.86  | -4.18  |
| O54297 RS4_SALTY 30S ribosomal protein S4                 | 8  |                      | SDLSADINEHLIVELYSK                    | 188 | 18 | 4  | 22.62  | b5b8y3y17                                      | 2046.04 | 79.017  | 4937   | 4 | 512.27  | 0.84   |
| O54297 RS4_SALTY 30S ribosomal protein S4                 | 9  |                      | GNTGENLLALLEGR                        | 83  | 14 | 6  | 32.52  | b7*b7b9*b9b12y13                               | 1456.76 | 93.684  | 4466   | 2 | 728.89  | -7.88  |
| O54297 RS4_SALTY 30S ribosomal protein S4                 | 10 |                      | LKGTGENLLALLEGR                       | 81  | 16 | 5  | 38.3   | b8y3*y3y4y5                                    | 1697.93 | 87.597  | 11689  | 3 | 566.65  | -12.87 |
| O54297 RS4_SALTY 30S ribosomal protein S4                 | 11 |                      | LDNVVYRMGFGATR                        | 97  | 14 | 4  | 19.96  | b12*b12y9y13                                   | 1598.83 | 122.768 | 2435   | 2 | 799.92  | 11.15  |
| O54297 RS4_SALTY 30S ribosomal protein S4                 | 12 | Carbamidomethyl+C(1) | CKIEQAPGQHGAR                         | 31  | 13 | 5  | 30.68  | b5b7*b7y8y10                                   | 1451.70 | 60.937  | 1669   | 3 | 484.57  | -13.96 |
| P0A2M5 UPP_SALTY Uracil phohoribosyltransferase           | 1  |                      | VLVLVAAPEGIAALEK                      | 155 | 16 | 11 | 84.67  | b2b3b4b5b6b7y1y3y9y11y16                       | 1592.97 | 85.913  | 33408  | 2 | 796.99  | 2.07   |
| P0A2M5 UPP_SALTY Uracil phohoribosyltransferase           | 2  |                      | NEETLEPVVPYFQK                        | 103 | 13 | 4  | 28.83  | b1y5y7y8                                       | 1593.80 | 65.246  | 25141  | 2 | 797.40  | 13.86  |
| P0A2M5 UPP_SALTY Uracil phohoribosyltransferase           | 3  |                      | AGLGMMEGVLENVPSAR                     | 78  | 17 | 11 | 72.12  | b11b13y1y2y4y5y7y11y12y13y17                   | 1730.86 | 81.594  | 24879  | 2 | 865.94  | 3.60   |
| P0A2M5 UPP_SALTY Uracil phohoribosyltransferase           | 4  |                      | ITVVPILR                              | 70  | 8  | 5  | 41.71  | y2y4y5y6y8                                     | 910.60  | 69.394  | 11868  | 2 | 455.80  | -8.98  |
| P0A2M5 UPP_SALTY Uracil phohoribosyltransferase           | 5  |                      | LVSNI DER                             | 116 | 8  | 9  | 41.71  | y2*y2y3*y3y6y7*y7y8*y8                         | 945.49  | 34.942  | 5528   | 2 | 473.25  | -7.10  |
| P0A2M5 UPP_SALTY Uracil phohoribosyltransferase           | 6  |                      | AHPDVELYASIDQGLNEHGYYIP GLGDAGDK      | 171 | 32 | 4  | 17.15  | b5b8*b8b13                                     | 3365.65 | 91.848  | 3709   | 3 | 1122.56 | 7.18   |
| P0A2M5 UPP_SALTY Uracil phohoribosyltransferase           | 7  |                      | FRELASEVGSLTYEATADLETEK               | 27  | 24 | 5  | 28.61  | b3b8b9y4y13                                    | 2672.37 | 102.018 | 2452   | 2 | 1336.69 | 13.34  |
| P0A2M5 UPP_SALTY Uracil phohoribosyltransferase           | 8  |                      | ELASEVGSLTYEATADLETEK                 | 29  | 22 | 9  | 45.75  | b4b6*b6b9b13*b13b14y6y12                       | 2369.20 | 88.544  | 4528   | 2 | 1185.10 | 17.42  |
| P0A2M5 UPP_SALTY Uracil phohoribosyltransferase           | 9  |                      | AHPDVELYASIDQGLNEHGYYIP GLGDAGDKIFGTK | 171 | 37 | 9  | 50.8   | b4b6b7b8y4y10y11y14*y14                        | 3911.95 | 88.526  | 40208  | 4 | 978.74  | 1.62   |
| P0A2M5 UPP_SALTY Uracil phohoribosyltransferase           | 10 |                      | LGLMRENDISTK                          | 14  | 12 | 3  | 23.01  | b3b11y6                                        | 1376.73 | 39.263  | 8515   | 3 | 459.58  | 7.27   |
| P0A2M5 UPP_SALTY Uracil phohoribosyltransferase           | 11 | Phosphoryl STY(14)   | FRELASEVGSLTYEATADLETEK               | 27  | 24 | 4  | 36.18  | b18y8y9y10                                     | 2752.29 | 73.944  | 3796   | 4 | 688.83  | 0.80   |
| P23905 DGAL_SALTY D-galactose-binding periplasmic protein | 1  |                      | ALAINLVDPAAGTVIEK                     | 84  | 18 | 14 | 93.12  | b2b3b4b5*b5b6y1y2*y2y11y12y13y14y18            | 1766.01 | 80.489  | 100567 | 2 | 883.51  | 1.87   |

|                                                           |    |                    |                               |     |    |    |        |                                              |         |         |       |   |         |        |
|-----------------------------------------------------------|----|--------------------|-------------------------------|-----|----|----|--------|----------------------------------------------|---------|---------|-------|---|---------|--------|
| P23905 DGAL_SALTY D-galactose-binding periplasmic protein | 2  |                    | SSIPVFGVDALPEALALVK           | 250 | 19 | 15 | 109.2  | b2b4b5°b5y1y2y3y5y8y10y11y13y14y16y19        | 1926.10 | 107.608 | 90808 | 2 | 963.55  | 2.79   |
| P23905 DGAL_SALTY D-galactose-binding periplasmic protein | 3  |                    | SGAMAGTVLNDANNQAK             | 269 | 17 | 18 | 145.57 | b2b3b4b6b9°b9y4y5*y5y6y7y8y9y10y12°y12y13y17 | 1661.79 | 45.971  | 85988 | 2 | 831.40  | 0.51   |
| P23905 DGAL_SALTY D-galactose-binding periplasmic protein | 4  |                    | VPYVGVDKDNLSEFTQK             | 315 | 17 | 5  | 28.3   | b3y5y6y9y17                                  | 1938.97 | 61.211  | 55854 | 3 | 646.99  | -6.67  |
| P23905 DGAL_SALTY D-galactose-binding periplasmic protein | 5  |                    | HWQANQGWDLNKDGK               | 148 | 15 | 10 | 75.55  | b2b3b4b5b7y2y4y5y8y14                        | 1796.82 | 45.976  | 43045 | 3 | 599.61  | -13.11 |
| P23905 DGAL_SALTY D-galactose-binding periplasmic protein | 6  |                    | DNLSEFTQK                     | 323 | 9  | 7  | 31.3   | b2b4°b4y6*y6y8*y8                            | 1081.51 | 30.701  | 5888  | 2 | 541.26  | -5.87  |
| P23905 DGAL_SALTY D-galactose-binding periplasmic protein | 7  |                    | GIQTEQLALDTAMWDTAQAKDK        | 192 | 22 | 7  | 18.94  | b3b14b22y2y6y8°y8                            | 2434.16 | 80.548  | 5200  | 2 | 1217.58 | -13.14 |
| P23905 DGAL_SALTY D-galactose-binding periplasmic protein | 8  |                    | YDDNFMSVVR                    | 34  | 10 | 4  | 42.47  | y3y5y9*y9                                    | 1245.56 | 66.014  | 28061 | 2 | 623.28  | 2.74   |
| P23905 DGAL_SALTY D-galactose-binding periplasmic protein | 9  |                    | ESGVIQGDLIAK                  | 136 | 12 | 3  | 23.01  | b9y3y8                                       | 1229.67 | 53.455  | 20441 | 2 | 615.34  | -6.85  |
| P23905 DGAL_SALTY D-galactose-binding periplasmic protein | 10 |                    | NLAEGK                        | 293 | 6  | 1  | 13.9   | b4                                           | 631.34  | 46.371  | 7818  | 1 | 631.34  | -8.51  |
| P23905 DGAL_SALTY D-galactose-binding periplasmic protein | 11 |                    | ELNDK                         | 187 | 5  | 1  | 13.53  | y4                                           | 618.30  | 48.955  | 3835  | 1 | 618.30  | -8.09  |
| P23905 DGAL_SALTY D-galactose-binding periplasmic protein | 12 |                    | GAADGTSWK                     | 299 | 9  | 3  | 31.3   | b3y4y6                                       | 892.43  | 68.119  | 1760  | 1 | 892.43  | 10.53  |
| P23905 DGAL_SALTY D-galactose-binding periplasmic protein | 13 |                    | SAPDVQLLMNDSQNDQSKQNDQIDVLLAK | 52  | 29 | 6  | 36.43  | b12b13y4y5y21°y21                            | 3227.60 | 77.985  | 36287 | 3 | 1076.54 | 5.45   |
| P23905 DGAL_SALTY D-galactose-binding periplasmic protein | 14 |                    | DGKSAPDVQLLMNDSQNDQSK         | 49  | 21 | 5  | 24.02  | b5°b5b6b13°b13                               | 2290.06 | 77.405  | 19686 | 3 | 764.03  | 0.85   |
| P23905 DGAL_SALTY D-galactose-binding periplasmic protein | 15 |                    | NLAEGKGAADGTSWK               | 293 | 15 | 4  | 18.79  | b7y3°y3y7                                    | 1504.73 | 37.398  | 16178 | 3 | 502.25  | -3.41  |
| P23905 DGAL_SALTY D-galactose-binding periplasmic protein | 16 |                    | ALDSYDKAYYVGTDISK             | 120 | 16 | 7  | 52.34  | b10y5y6°y6y7°y7y8                            | 1795.83 | 47.797  | 11943 | 3 | 599.28  | -6.59  |
| P23905 DGAL_SALTY D-galactose-binding periplasmic protein | 17 |                    | ELNDKGIQTEQLALDTAMWDTAQAK     | 187 | 25 | 10 | 91.15  | b12b22y3y5y6y7y8y9y10y12                     | 2790.36 | 79.755  | 11033 | 3 | 930.79  | -0.26  |
| P23905 DGAL_SALTY D-galactose-binding periplasmic protein | 18 |                    | KALDSYDK                      | 119 | 8  | 3  | 33.93  | b4b5y3                                       | 939.48  | 47.546  | 3025  | 2 | 470.24  | 1.23   |
| P23905 DGAL_SALTY D-galactose-binding periplasmic protein | 19 |                    | SGAMAGTVLNDANNQAKATFDLAK      | 269 | 24 | 4  | 26.88  | b8b9y6y10                                    | 2408.17 | 76.906  | 2601  | 4 | 602.80  | -8.72  |
| P23905 DGAL_SALTY D-galactose-binding periplasmic protein | 20 | Phosphoryl STY(15) | VPYVGVDKDNLSEFTQK             | 315 | 17 | 4  | 27.05  | b9b12b14y3                                   | 2018.96 | 93.536  | 7051  | 3 | 673.66  | 12.39  |



|                                                           |    |                       |                         |     |    |    |        |                                                                                   |         |         |        |   |         |        |
|-----------------------------------------------------------|----|-----------------------|-------------------------|-----|----|----|--------|-----------------------------------------------------------------------------------|---------|---------|--------|---|---------|--------|
| P23905 DGAL_SALTY D-galactose-binding periplasmic protein | 21 | Phosphoryl STY(11)    | AYYVGTDSKESGVIQGDLIAK   | 127 | 21 | 4  | 22.82  | b9b10°b10y12                                                                      | 2294.12 | 67.397  | 5100   | 3 | 765.38  | 12.88  |
| P23905 DGAL_SALTY D-galactose-binding periplasmic protein | 22 | Oxidation+M(9)        | SAPDVQLLMNDSQNDQSK      | 52  | 18 | 3  | 16.15  | b13b17y9                                                                          | 2005.94 | 90.103  | 86798  | 2 | 1003.47 | 13.02  |
| P23905 DGAL_SALTY D-galactose-binding periplasmic protein | 23 | Oxidation+M(13)       | GIQTEQLALDTAMWDTAQAKDK  | 192 | 22 | 5  | 13.9   | b3*b3b5°b5y11                                                                     | 2450.22 | 128.396 | 2327   | 3 | 817.41  | 12.16  |
| P64052 EFTS_SALTY Elongation factor Ts                    | 1  |                       | ITDVEVLK                | 104 | 8  | 5  | 58.25  | y3y4y6y7y8                                                                        | 916.52  | 48.341  | 170199 | 2 | 458.77  | -11.85 |
| P64052 EFTS_SALTY Elongation factor Ts                    | 2  |                       | VASLEGDVLGSYQHGAR       | 134 | 17 | 14 | 142.53 | b2b3y4y5y7y8*y8y9y10y12y13y15y16y17                                               | 1758.85 | 58.651  | 113152 | 3 | 586.96  | -13.88 |
| P64052 EFTS_SALTY Elongation factor Ts                    | 3  |                       | FTGEVSLTGQPFVMEPSK      | 222 | 18 | 9  | 51.86  | b3b5b12y1y3y5°y5y13y14                                                            | 1953.97 | 74.568  | 79796  | 2 | 977.49  | 5.06   |
| P64052 EFTS_SALTY Elongation factor Ts                    | 4  |                       | IGENINIR                | 125 | 8  | 11 | 68.77  | y2y3*y3y4*y4y5*y5y6y7*y7y8                                                        | 928.51  | 44.195  | 67334  | 2 | 464.76  | -11.24 |
| P64052 EFTS_SALTY Elongation factor Ts                    | 5  |                       | SVGQLLKEHNADVTGFIR      | 240 | 18 | 8  | 33.93  | b1b4b6y2y4y9y10y18                                                                | 1984.04 | 65.099  | 25548  | 3 | 662.02  | -8.55  |
| P64052 EFTS_SALTY Elongation factor Ts                    | 6  |                       | ALTEANGDIELAIENMRK      | 25  | 18 | 3  | 23.31  | y5y14y16                                                                          | 1987.99 | 74.070  | 25269  | 3 | 663.33  | -12.83 |
| P64052 EFTS_SALTY Elongation factor Ts                    | 7  |                       | AGNVAADGVIK             | 52  | 11 | 9  | 75.65  | b3y1y4y6°y6y8y9y10y11                                                             | 1014.55 | 36.427  | 21728  | 2 | 507.78  | -8.66  |
| P64052 EFTS_SALTY Elongation factor Ts                    | 8  |                       | ALTEANGDIELAIENMR       | 25  | 17 | 6  | 35.22  | b7b13°b13y4y5y13                                                                  | 1859.93 | 80.541  | 11611  | 2 | 930.47  | 9.78   |
| P64052 EFTS_SALTY Elongation factor Ts                    | 9  |                       | DAGFQAFADK              | 85  | 10 | 7  | 61.74  | b3b5b9°b9y6y8y10                                                                  | 1069.51 | 28.135  | 11451  | 2 | 535.26  | 12.33  |
| P64052 EFTS_SALTY Elongation factor Ts                    | 10 |                       | AQFEER                  | 112 | 7  | 4  | 41.34  | y3y4y5y7                                                                          | 908.40  | 24.733  | 8908   | 2 | 454.71  | -6.99  |
| P64052 EFTS_SALTY Elongation factor Ts                    | 11 | Carbamidomethyl+C(8)  | TGAGMMDCKK              | 15  | 10 | 5  | 42.47  | b2°b2y3y5y7                                                                       | 1098.47 | 20.834  | 6003   | 2 | 549.74  | 0.56   |
| P64052 EFTS_SALTY Elongation factor Ts                    | 12 | Carbamidomethyl+C(13) | IDGNVAFILEVNCQTDFVAK    | 65  | 20 | 4  | 21.68  | b3b8b10y1                                                                         | 2253.11 | 124.557 | 1530   | 3 | 751.71  | -7.04  |
| P64052 EFTS_SALTY Elongation factor Ts                    | 13 |                       | AEITASLVK               | 1   | 9  | 4  | 46.59  | b3y4y5y6                                                                          | 931.53  | 48.408  | 82891  | 2 | 466.27  | -16.84 |
| P64052 EFTS_SALTY Elongation factor Ts                    | 14 |                       | IGVLVAAK                | 151 | 8  | 4  | 50.47  | b3y3y6y7                                                                          | 770.50  | 46.814  | 54887  | 2 | 385.75  | -20.91 |
| P64052 EFTS_SALTY Elongation factor Ts                    | 15 |                       | VLDAAVAGK               | 95  | 9  | 3  | 31.3   | b4y3y7                                                                            | 843.48  | 33.344  | 35894  | 2 | 422.24  | -15.27 |
| P64052 EFTS_SALTY Elongation factor Ts                    | 16 |                       | FEVGEGIEK               | 258 | 9  | 4  | 46.08  | b7b8y4y8                                                                          | 1007.51 | 47.934  | 13773  | 2 | 504.26  | 3.88   |
| P64052 EFTS_SALTY Elongation factor Ts                    | 17 |                       | VALVAK                  | 119 | 6  | 3  | 40.96  | b4y4y5                                                                            | 600.41  | 46.811  | 3626   | 1 | 600.41  | -2.03  |
| P64052 EFTS_SALTY Elongation factor Ts                    | 18 |                       | EHNADVTGFIRFEVGEGIEK    | 247 | 20 | 7  | 36.87  | b11b12°b12°b12b13°b13y4                                                           | 2247.13 | 68.891  | 266968 | 3 | 749.72  | 12.93  |
| P64052 EFTS_SALTY Elongation factor Ts                    | 19 |                       | FEVGEGIEKVETDFAAEVAAMSK | 258 | 23 | 31 | 300.16 | b3b4°b4b5b8°b8b9b10b11b13b15b17y3°y3y4y5°y5y6y7°y7y8°y8y9y10y11y12y13y14y15y20y21 | 2457.18 | 105.466 | 156016 | 3 | 819.73  | -2.38  |
| P64052 EFTS_SALTY Elongation factor Ts                    | 20 |                       | KAGNVAADGVIK            | 51  | 12 | 8  | 84.32  | b3b5b9b11y4y10y11°y11                                                             | 1142.65 | 31.021  | 54047  | 2 | 571.83  | -5.56  |
| P64052 EFTS_SALTY Elongation factor Ts                    | 21 |                       | RVASLEGDVLGSYQHGAR      | 133 | 18 | 3  | 16.15  | b5b9y9                                                                            | 1914.96 | 53.945  | 13086  | 3 | 638.99  | -9.43  |
| P64052 EFTS_SALTY Elongation factor Ts                    | 22 |                       | DAGFQAFADKVLDAAVAGK     | 85  | 19 | 6  | 26.72  | b10°b10b11°b11b13y3                                                               | 1893.96 | 82.002  | 4247   | 3 | 631.99  | -3.80  |
| P64052 EFTS_SALTY Elongation factor Ts                    | 23 | Oxidation+M(14)       | FTGEVSLTGQPFVMEPSK      | 222 | 18 | 3  | 16.15  | b10y3y9                                                                           | 1969.93 | 68.918  | 10222  | 4 | 493.24  | -11.46 |

|                                              |    |                       |                                              |     |    |    |        |                                                                    |         |         |        |   |         |        |
|----------------------------------------------|----|-----------------------|----------------------------------------------|-----|----|----|--------|--------------------------------------------------------------------|---------|---------|--------|---|---------|--------|
| P64052 EFTS_SALTY Elongation factor Ts       | 24 | Oxidation+M(4)        | QLAMHVAASKPEFVKPEDVSADV<br>VEK               | 167 | 26 | 3  | 23.16  | y10y11y20                                                          | 2840.45 | 61.158  | 3621   | 3 | 947.49  | 0.69   |
| P64052 EFTS_SALTY Elongation factor Ts       | 25 | Oxidation+M(12)       | VETDFAAEVAAMSK                               | 267 | 14 | 3  | 19.96  | b4b6y4                                                             | 1484.67 | 136.612 | 2671   | 1 | 1484.67 | -13.32 |
| P64052 EFTS_SALTY Elongation factor Ts       | 26 |                       | GENINIR                                      | 126 | 7  | 1  | 9.89   | b3                                                                 | 815.43  | 44.194  | 2065   | 1 | 815.43  | -8.23  |
| P64052 EFTS_SALTY Elongation factor Ts       | 27 | Carbamidomethyl+C(7)  | GAGMMDCKK                                    | 16  | 9  | 1  | 8.42   | b3                                                                 | 997.42  | 20.830  | 1618   | 2 | 499.22  | -2.57  |
| Q7CPE1 ATPA_SALTY ATP synthase subunit alpha | 1  |                       | IGSFEAALLAYVDRDHAPLMQEIN<br>QSGGYNDEIEGK     | 463 | 36 | 22 | 114.81 | b2b5b7°b7b8b22b23b25y2<br>y3°y3y5y7°y7y8y10y11y12<br>*y12y13y14y36 | 3950.89 | 94.993  | 120628 | 4 | 988.48  | 1.61   |
| Q7CPE1 ATPA_SALTY ATP synthase subunit alpha | 2  |                       | MQLNSTEISELIK                                | 0   | 13 | 11 | 57.95  | b2b3b12°b12y2y3y9y10y1<br>1y13*y13                                 | 1505.79 | 76.567  | 60477  | 2 | 753.40  | 0.65   |
| Q7CPE1 ATPA_SALTY ATP synthase subunit alpha | 3  | Carbamidomethyl+C(7)  | IHGLADCMQGEMISLPGNR                          | 40  | 19 | 13 | 87.3   | b2b3b5b7b9b12y3y4*y4y6<br>y8y10y19                                 | 2098.97 | 68.562  | 54660  | 3 | 700.33  | -4.65  |
| Q7CPE1 ATPA_SALTY ATP synthase subunit alpha | 4  |                       | DSVGAVVMGPYADLAEGMK                          | 68  | 19 | 13 | 121.41 | b4b5b6°b6b8b9b12b13y10<br>y11y12y13y19                             | 1909.92 | 83.477  | 43710  | 2 | 955.47  | 10.23  |
| Q7CPE1 ATPA_SALTY ATP synthase subunit alpha | 5  |                       | TALAIADAIINQR                                | 175 | 12 | 9  | 30.21  | b2°b2y1y2*y2y3y4y8y12                                              | 1298.74 | 73.804  | 40731  | 2 | 649.87  | -5.55  |
| Q7CPE1 ATPA_SALTY ATP synthase subunit alpha | 6  |                       | ILEVPVGR                                     | 93  | 8  | 6  | 41.71  | b2y4y5y6°y6y8                                                      | 882.53  | 52.228  | 36460  | 2 | 441.77  | -13.42 |
| Q7CPE1 ATPA_SALTY ATP synthase subunit alpha | 7  |                       | GYLADVELAK                                   | 453 | 10 | 7  | 59.52  | b7y2y3y6y7y8y10                                                    | 1078.57 | 60.035  | 34983  | 2 | 539.79  | -9.17  |
| Q7CPE1 ATPA_SALTY ATP synthase subunit alpha | 8  |                       | YAIALNLER                                    | 59  | 9  | 7  | 39.08  | b1b2y1y3y5y6y9                                                     | 1062.59 | 64.268  | 34698  | 2 | 531.80  | -4.48  |
| Q7CPE1 ATPA_SALTY ATP synthase subunit alpha | 9  |                       | ASTISNVVR                                    | 201 | 9  | 9  | 76.65  | b2b7y2y3y4y5y6y7y9                                                 | 946.53  | 36.898  | 32392  | 2 | 473.77  | -6.58  |
| Q7CPE1 ATPA_SALTY ATP synthase subunit alpha | 10 |                       | ELAAFSQFASDLDDATR                            | 401 | 17 | 11 | 91.09  | b5b8y3°y3y4y5y8y9y12y13<br>y17                                     | 1856.88 | 88.309  | 30962  | 2 | 928.94  | 8.15   |
| Q7CPE1 ATPA_SALTY ATP synthase subunit alpha | 11 |                       | QSVDQPVPQTGYK                                | 139 | 12 | 14 | 115.93 | b2b8b12y3y4y5*y5y6y7y8<br>*y8y9y10y12                              | 1349.67 | 33.860  | 23724  | 2 | 675.34  | -2.89  |
| Q7CPE1 ATPA_SALTY ATP synthase subunit alpha | 12 |                       | QYAPMSVAQQLVLFAAER                           | 434 | 19 | 11 | 30.57  | b2*b2b3°b3b9b11y2°y2y4<br>y6y19                                    | 2109.10 | 93.078  | 22993  | 2 | 1055.06 | 11.00  |
| Q7CPE1 ATPA_SALTY ATP synthase subunit alpha | 13 |                       | ELAAFSQFASDLDDATR                            | 401 | 18 | 8  | 58.74  | b2b11b12y3y4y9y10y18                                               | 1984.94 | 82.993  | 22119  | 3 | 662.32  | -8.61  |
| Q7CPE1 ATPA_SALTY ATP synthase subunit alpha | 14 |                       | YAIALNLERDSVGAVVMGPYADL<br>AEGMK             | 59  | 28 | 5  | 17.93  | b10y5y9y11°y11                                                     | 2953.45 | 98.113  | 16939  | 3 | 985.16  | -9.67  |
| Q7CPE1 ATPA_SALTY ATP synthase subunit alpha | 15 |                       | EAFPGDVFYLHSR                                | 283 | 13 | 4  | 28.83  | b5b6b11y13                                                         | 1537.75 | 76.342  | 9286   | 3 | 513.26  | 4.76   |
| Q7CPE1 ATPA_SALTY ATP synthase subunit alpha | 16 |                       | AVDSMPIGR                                    | 151 | 10 | 4  | 52.98  | y4y5y6y7                                                           | 1058.56 | 59.624  | 41498  | 2 | 529.78  | -8.53  |
| Q7CPE1 ATPA_SALTY ATP synthase subunit alpha | 17 |                       | VNADYVEAFTK                                  | 303 | 11 | 4  | 25.06  | b3b7y8°y8                                                          | 1256.64 | 41.200  | 23703  | 2 | 628.82  | 16.42  |
| Q7CPE1 ATPA_SALTY ATP synthase subunit alpha | 18 |                       | IAQFNVVSEAHNEGTVSVSDGVI<br>R                 | 15  | 25 | 5  | 12.79  | b10b12°b12*b12y15                                                  | 2641.39 | 93.086  | 11947  | 3 | 881.13  | 11.46  |
| Q7CPE1 ATPA_SALTY ATP synthase subunit alpha | 19 |                       | TALAQYR                                      | 394 | 7  | 4  | 41.34  | b5*b5y3y5                                                          | 822.46  | 41.941  | 7312   | 2 | 411.73  | 14.55  |
| Q7CPE1 ATPA_SALTY ATP synthase subunit alpha | 20 |                       | GPVDNDGFSAVEAIPGVIDR                         | 118 | 21 | 7  | 24.02  | b4°b4b5°b5*b5b11*b11                                               | 2099.08 | 85.005  | 3061   | 2 | 1050.04 | 18.84  |
| Q7CPE1 ATPA_SALTY ATP synthase subunit alpha | 21 |                       | DHAPLMQEINQSGGYNDEIEGK                       | 477 | 22 | 3  | 23.77  | y6y7y11                                                            | 2445.12 | 100.425 | 2888   | 4 | 612.04  | 8.19   |
| Q7CPE1 ATPA_SALTY ATP synthase subunit alpha | 22 |                       | VGGAAQTK                                     | 376 | 8  | 3  | 33.93  | b3y6y7                                                             | 731.40  | 50.805  | 2608   | 1 | 731.40  | -7.76  |
| Q7CPE1 ATPA_SALTY ATP synthase subunit alpha | 23 |                       | VVNTLGAPIDGKGPVDNDGFSAV<br>EAIAPGVIDR        | 106 | 33 | 19 | 116.83 | b3b4°b4b7°b7b26y3°y3y6y<br>9y10y11y13y14y15y17y26°<br>y26y28       | 3263.71 | 84.168  | 55693  | 3 | 1088.57 | 5.91   |
| Q7CPE1 ATPA_SALTY ATP synthase subunit alpha | 24 | Carbamidomethyl+C(33) | KLEEHGALANTIVVVATASESAAL<br>QYLAPYAGCAMGEYFR | 210 | 40 | 7  | 25.15  | b12b14y3y5°y5y6y12                                                 | 4272.11 | 121.987 | 33613  | 4 | 1068.78 | 0.11   |

|                                              |    |                      |                               |     |    |    |        |                                      |         |         |       |   |         |        |
|----------------------------------------------|----|----------------------|-------------------------------|-----|----|----|--------|--------------------------------------|---------|---------|-------|---|---------|--------|
| Q7CPE1 ATPA_SALTY ATP synthase subunit alpha | 25 |                      | DRGEDALIYDDLSK                | 250 | 15 | 12 | 133.33 | b6b7b8b10b11°b11b12b13y4y5y6y7       | 1722.86 | 73.411  | 33570 | 2 | 861.93  | 2.55   |
| Q7CPE1 ATPA_SALTY ATP synthase subunit alpha | 26 |                      | QKQYAPMSVAQQSLVLFAAER         | 432 | 21 | 7  | 30.86  | b8°b8b12b13°b13y4y6                  | 2365.22 | 85.659  | 12913 | 3 | 789.08  | -7.43  |
| Q7CPE1 ATPA_SALTY ATP synthase subunit alpha | 27 |                      | VNADYVEAFTKGEVK               | 303 | 15 | 4  | 26.87  | b3b6°b6b11                           | 1669.86 | 103.303 | 7609  | 2 | 835.43  | 9.50   |
| Q7CPE1 ATPA_SALTY ATP synthase subunit alpha | 28 | Carbamidomethyl+C(6) | DSGIKCIYVAIGQK                | 187 | 14 | 3  | 19.96  | b5b8y13                              | 1551.84 | 84.394  | 3871  | 2 | 776.42  | 12.11  |
| Q7CPE1 ATPA_SALTY ATP synthase subunit alpha | 29 | Phosphoryl STY(10)   | ELAAFSQFASDLDDATRK            | 401 | 18 | 4  | 16.15  | b9°b9y6y8                            | 2064.95 | 104.025 | 2850  | 4 | 516.99  | 14.54  |
| Q7CPE1 ATPA_SALTY ATP synthase subunit alpha | 30 | Oxidation+M(8)       | DSVGAVVMGPYADLAEGMK           | 68  | 19 | 4  | 24.5   | b3y5y7y12                            | 1925.92 | 90.171  | 10397 | 2 | 963.46  | 11.92  |
| Q7CPE1 ATPA_SALTY ATP synthase subunit alpha | 31 | Oxidation+M(17)      | YAIALNLERDSVGAVVMGPYADLAEGMK  | 59  | 28 | 3  | 18.02  | y5y8y14                              | 2969.47 | 123.150 | 5801  | 4 | 743.12  | -0.25  |
| Q7CPE1 ATPA_SALTY ATP synthase subunit alpha | 32 |                      | ADVELAK                       | 456 | 7  | 0  | 1.89   |                                      | 745.40  | 60.040  | 2086  | 1 | 745.40  | -14.41 |
| Q7CPE1 ATPA_SALTY ATP synthase subunit alpha | 33 |                      | ASTISNVVR                     | 201 | 9  | 0  | 1.51   |                                      | 928.51  | 36.894  | 4448  | 2 | 464.76  | -3.75  |
| Q7CPE1 ATPA_SALTY ATP synthase subunit alpha | 34 |                      | ELAAFSQFASDLDDATRK            | 401 | 18 | 0  | 4.9    |                                      | 1966.92 | 82.992  | 2376  | 3 | 656.31  | -13.59 |
| P66738 RRF_SALTY Ribosome-recycling factor   | 1  |                      | ASPSLLDGIVVEYYGTPTPLR         | 31  | 21 | 12 | 84.69  | b8b15b16y2y3y5y10y11y12y14y15y21     | 2248.21 | 93.198  | 42592 | 2 | 1124.61 | 9.01   |
| P66738 RRF_SALTY Ribosome-recycling factor   | 2  |                      | QLASVTVEDSR                   | 52  | 11 | 15 | 102.7  | b2°b2b7y2y3°y3y4y5y6y7y8°y8y9y11°y11 | 1204.61 | 39.684  | 19748 | 2 | 602.81  | -4.66  |
| P66738 RRF_SALTY Ribosome-recycling factor   | 3  |                      | AIMASDLGLNPSSAGTDIR           | 80  | 19 | 4  | 35.07  | y2y13y14y15                          | 1888.95 | 67.216  | 15167 | 2 | 944.98  | 5.23   |
| P66738 RRF_SALTY Ribosome-recycling factor   | 4  |                      | VDAALADKEAELMQF               | 170 | 15 | 4  | 18.79  | b11y10°y10y12                        | 1650.81 | 78.681  | 8600  | 2 | 825.91  | 5.47   |
| P66738 RRF_SALTY Ribosome-recycling factor   | 5  |                      | SQEEVQK                       | 155 | 7  | 4  | 38.33  | b3°b3b4y3                            | 847.42  | 35.490  | 1763  | 2 | 424.21  | 0.50   |
| P66738 RRF_SALTY Ribosome-recycling factor   | 6  |                      | AIMASDLGLNPSSAGTDIRVPLPPLTEER | 80  | 29 | 5  | 31.2   | b6b7y12y22y26                        | 3020.59 | 86.332  | 63307 | 3 | 1007.53 | 5.33   |
| P66738 RRF_SALTY Ribosome-recycling factor   | 7  |                      | SMGPAVEKAIMASDLGLNPSSAGTDIR   | 72  | 27 | 4  | 18.31  | b8°b8b12b16                          | 2688.32 | 58.065  | 10058 | 4 | 672.84  | -5.09  |
| P66738 RRF_SALTY Ribosome-recycling factor   | 8  |                      | IVRGAEAQAR                    | 115 | 10 | 8  | 102.6  | b5b6b7y3°y3y5y7y9                    | 1128.61 | 15.915  | 7928  | 2 | 564.81  | -4.54  |
| P66738 RRF_SALTY Ribosome-recycling factor   | 9  | Oxidation+M(13)      | VDAALADKEAELMQF               | 170 | 15 | 4  | 18.79  | b4°b4b8y11                           | 1666.79 | 60.947  | 2909  | 3 | 556.27  | -6.37  |
| P66738 RRF_SALTY Ribosome-recycling factor   | 10 | Oxidation+M(3)       | AIMASDLGLNPSSAGTDIR           | 80  | 19 | 3  | 15.48  | b8b10y11                             | 1904.96 | 92.645  | 1949  | 3 | 635.66  | 11.21  |
| Q7CPE2 ATPB_SALTY ATP synthase subunit beta  | 1  | Carbamidomethyl+C(6) | VIDLMCPFAK                    | 132 | 10 | 10 | 59.52  | b2b3b10°b10y1y4y5y6y8y10             | 1193.60 | 80.485  | 59405 | 2 | 597.31  | -2.15  |
| Q7CPE2 ATPB_SALTY ATP synthase subunit beta  | 2  |                      | GIMEGEYDHLPEQAFYMVGSIDEAVEK   | 429 | 27 | 10 | 61.24  | b2b5y5y6°y6y8y9y11y12y27             | 3057.41 | 99.378  | 58106 | 3 | 1019.81 | 8.86   |
| Q7CPE2 ATPB_SALTY ATP synthase subunit beta  | 3  |                      | VALTGLTMAEK                   | 219 | 11 | 10 | 89.17  | b2b6y4y5y7y8y9°y9y10y11              | 1133.61 | 59.010  | 58033 | 2 | 567.31  | -10.01 |
| Q7CPE2 ATPB_SALTY ATP synthase subunit beta  | 4  |                      | QLDPLVVQGEHYDTAR              | 343 | 16 | 11 | 118.11 | b16y3y4y5y6y8y9y10°y10y11y12         | 1840.90 | 57.400  | 54073 | 3 | 614.30  | -11.21 |
| Q7CPE2 ATPB_SALTY ATP synthase subunit beta  | 5  |                      | TIAMGSSDGLR                   | 53  | 11 | 10 | 36.37  | b1b2°b2b5b10b11y7°y7y10y11           | 1107.56 | 50.977  | 49493 | 2 | 554.28  | 11.35  |
| Q7CPE2 ATPB_SALTY ATP synthase subunit beta  | 6  |                      | QIASLGIYPAVDPLDSTSR           | 324 | 19 | 9  | 72.8   | b16y4y7y10y11y12y14y15y19            | 2003.06 | 80.483  | 47595 | 2 | 1002.03 | 5.55   |
| Q7CPE2 ATPB_SALTY ATP synthase subunit beta  | 7  |                      | VYDALEVQNGNEK                 | 25  | 13 | 9  | 56.19  | b2b3b10y2y5y7y8y11y13                | 1478.71 | 44.250  | 45198 | 2 | 739.86  | 1.49   |
| Q7CPE2 ATPB_SALTY ATP synthase subunit beta  | 8  |                      | YTLAGTEVSALLGR                | 247 | 14 | 10 | 68.84  | b2°b2b4b8y4y6y7y10y11y14             | 1450.79 | 79.758  | 44915 | 2 | 725.90  | -1.94  |
| Q7CPE2 ATPB_SALTY ATP synthase subunit beta  | 9  |                      | TVNMMELIR                     | 156 | 9  | 7  | 76.65  | b4y3y4y5y6y7y9                       | 1106.56 | 75.540  | 43470 | 2 | 553.78  | -8.71  |

|                                             |    |                       |                                       |     |    |    |        |                                        |         |         |       |   |         |        |
|---------------------------------------------|----|-----------------------|---------------------------------------|-----|----|----|--------|----------------------------------------|---------|---------|-------|---|---------|--------|
| Q7CPE2 ATPB_SALTY ATP synthase subunit beta | 10 |                       | FLSQPFFVAEVFTGSPGK                    | 399 | 18 | 14 | 90.14  | b2b3°b3b4b6b10y2y3y6y7y11y14y16y18     | 1958.02 | 99.464  | 39087 | 2 | 979.52  | 9.29   |
| Q7CPE2 ATPB_SALTY ATP synthase subunit beta | 11 |                       | MPSAVGYQPTLAEEMGVLQER                 | 261 | 21 | 9  | 57.17  | b3b5b12b14y6y9y11y13y21                | 2306.14 | 81.412  | 37304 | 2 | 1153.57 | 9.32   |
| Q7CPE2 ATPB_SALTY ATP synthase subunit beta | 12 |                       | VGLFGGAGVGK                           | 145 | 11 | 6  | 28.07  | b9y1y2y7y8y11                          | 961.54  | 58.603  | 33470 | 2 | 481.27  | -9.84  |
| Q7CPE2 ATPB_SALTY ATP synthase subunit beta | 13 |                       | GLDVKDLEHPIEVPVGK                     | 65  | 17 | 7  | 30.82  | b2b3b9y1y4y5y17                        | 1844.99 | 66.892  | 28657 | 3 | 615.67  | -12.70 |
| Q7CPE2 ATPB_SALTY ATP synthase subunit beta | 14 |                       | AAPSYEELSNSQELLETKIK                  | 112 | 20 | 8  | 48.11  | b2b15y4y5y11y12y14y20                  | 2179.05 | 73.604  | 27905 | 3 | 727.02  | -10.53 |
| Q7CPE2 ATPB_SALTY ATP synthase subunit beta | 15 |                       | GVQSILQR                              | 359 | 8  | 5  | 33.93  | b2b3b4y4y8                             | 900.52  | 39.226  | 22374 | 2 | 450.76  | -7.79  |
| Q7CPE2 ATPB_SALTY ATP synthase subunit beta | 16 |                       | YVSLKDTIR                             | 417 | 9  | 6  | 61.36  | b6b7y3y4y5y9                           | 1094.62 | 45.055  | 16651 | 2 | 547.81  | -3.57  |
| Q7CPE2 ATPB_SALTY ATP synthase subunit beta | 17 |                       | DLEHPIEVPVGK                          | 70  | 12 | 7  | 35.29  | b4°b4b7b8y2y4y12                       | 1332.70 | 55.405  | 12367 | 3 | 444.90  | -14.84 |
| Q7CPE2 ATPB_SALTY ATP synthase subunit beta | 18 |                       | DEGRDVLLFVDNIYR                       | 232 | 15 | 5  | 18.79  | b7b12y7°y7y15                          | 1823.91 | 70.684  | 11230 | 2 | 912.46  | -11.78 |
| Q7CPE2 ATPB_SALTY ATP synthase subunit beta | 19 |                       | NIAIEHSGYSVFAGVGER                    | 165 | 18 | 4  | 39.47  | y8y11y12y13                            | 1905.92 | 65.663  | 16237 | 3 | 635.98  | -11.72 |
| Q7CPE2 ATPB_SALTY ATP synthase subunit beta | 20 |                       | DVLLFVDNIYR                           | 236 | 11 | 3  | 28.07  | b8y6y7                                 | 1366.71 | 90.912  | 9052  | 2 | 683.86  | -17.06 |
| Q7CPE2 ATPB_SALTY ATP synthase subunit beta | 21 |                       | IMNVLGEPVDMK                          | 87  | 12 | 3  | 26.99  | b6y5y6                                 | 1345.66 | 29.772  | 5089  | 3 | 449.23  | -18.60 |
| Q7CPE2 ATPB_SALTY ATP synthase subunit beta | 22 |                       | GVQSILQRYQELK                         | 359 | 13 | 4  | 26.12  | b5°b5b6y5                              | 1561.87 | 53.603  | 57839 | 3 | 521.30  | 2.50   |
| Q7CPE2 ATPB_SALTY ATP synthase subunit beta | 23 |                       | EGNDFYHEMTDSNVIDKVS LVYG QMNEPPGNR    | 185 | 32 | 4  | 39.89  | y5y6y11y12                             | 3655.63 | 84.326  | 17584 | 4 | 914.66  | -2.47  |
| Q7CPE2 ATPB_SALTY ATP synthase subunit beta | 24 | Carbamidomethyl+C(6)  | VIDLMCPFAKGGK                         | 132 | 13 | 4  | 21.35  | b6b8y11°y11                            | 1435.73 | 74.399  | 16440 | 2 | 718.37  | -6.63  |
| Q7CPE2 ATPB_SALTY ATP synthase subunit beta | 25 |                       | IMNVLGEPVDMKGEIGEEER                  | 87  | 20 | 3  | 24.31  | y8y9y13                                | 2245.07 | 69.236  | 13573 | 3 | 749.03  | -6.52  |
| Q7CPE2 ATPB_SALTY ATP synthase subunit beta | 26 |                       | VSLVYQMNEPPGNRLR                      | 202 | 17 | 6  | 40.06  | b8°b8b9b10b12°b12                      | 1930.00 | 84.164  | 11249 | 2 | 965.50  | 2.15   |
| Q7CPE2 ATPB_SALTY ATP synthase subunit beta | 27 | Carbamidomethyl+C(26) | AAPSYEELSNSQELLETKIKVIDLM C PFAK      | 112 | 30 | 4  | 22.52  | b5b8b9y8                               | 3353.68 | 120.492 | 9485  | 3 | 1118.56 | 4.08   |
| Q7CPE2 ATPB_SALTY ATP synthase subunit beta | 28 |                       | MPSAVGYQPTLAEEMGVLQERIT STK           | 261 | 26 | 4  | 37.17  | b6b7b8b12                              | 2836.43 | 107.916 | 1854  | 2 | 1418.72 | 4.56   |
| Q7CPE2 ATPB_SALTY ATP synthase subunit beta | 29 | Oxidation+M(11)       | IMNVLGEPVDMK                          | 87  | 12 | 3  | 26.99  | b9y10y11                               | 1361.67 | 59.884  | 3780  | 2 | 681.34  | -11.03 |
| Q7CPE2 ATPB_SALTY ATP synthase subunit beta | 30 |                       | QIASLGIYPAVDPLDS                      | 324 | 16 | 4  | 24.66  | y7°y7y12y13                            | 1658.85 | 80.529  | 5521  | 2 | 829.93  | -10.89 |
| P66313 RL6_SALTY 50S ribosomal protein L6   | 1  |                       | APVVVPAGVDVK                          | 6   | 12 | 13 | 127.91 | b2b3b5b11y2y3y5y6y7y8y9y10y12          | 1150.67 | 53.205  | 92672 | 2 | 575.84  | -8.70  |
| P66313 RL6_SALTY 50S ribosomal protein L6   | 2  |                       | ALLNSMVIGVTEGFTK                      | 69  | 16 | 14 | 75.04  | b2b4°b4b15y4y5y6y8°y8y12y13°y13°y13y16 | 1679.90 | 93.964  | 68790 | 2 | 840.45  | -3.20  |
| P66313 RL6_SALTY 50S ribosomal protein L6   | 3  | Carbamidomethyl+C(26) | GNVVNLSLGFSHPVHDHQLPAGIT AECPTQTEIVLK | 99  | 35 | 7  | 24.08  | b2b3b25y3y9y10y35                      | 3741.90 | 79.360  | 57438 | 4 | 936.23  | -7.50  |
| P66313 RL6_SALTY 50S ribosomal protein L6   | 4  |                       | INGQVITIK                             | 18  | 9  | 7  | 66.13  | b3y1y3y4y7y8y9                         | 985.59  | 48.171  | 55576 | 2 | 493.30  | -10.22 |
| P66313 RL6_SALTY 50S ribosomal protein L6   | 5  |                       | YADEVVR                               | 163 | 7  | 4  | 41.34  | y3y5y6y7                               | 851.42  | 29.976  | 47878 | 2 | 426.21  | -12.40 |
| P66313 RL6_SALTY 50S ribosomal protein L6   | 6  |                       | ALLNSMVIGVTEGFTKK                     | 69  | 17 | 5  | 37.63  | y3y7y9y15y17                           | 1807.97 | 87.987  | 45138 | 3 | 603.33  | -13.98 |
| P66313 RL6_SALTY 50S ribosomal protein L6   | 7  |                       | DGYADGWAQAGTAR                        | 55  | 14 | 6  | 25.4   | b3y10°y10°y10y11y14                    | 1438.64 | 49.669  | 43149 | 2 | 719.82  | 2.72   |
| P66313 RL6_SALTY 50S ribosomal protein L6   | 8  |                       | HADNALTFGPR                           | 44  | 11 | 13 | 97.93  | b2b3°b3b5b6b7°b7y3y5y9y10°y10y11       | 1198.59 | 45.032  | 39604 | 2 | 599.80  | -2.65  |

|                                              |    |  |                                              |     |    |    |        |                                                                                 |         |         |        |   |         |        |
|----------------------------------------------|----|--|----------------------------------------------|-----|----|----|--------|---------------------------------------------------------------------------------|---------|---------|--------|---|---------|--------|
| P66313 RL6_SALTY 50S ribosomal protein L6    | 9  |  | QVIGQVAADLR                                  | 138 | 11 | 6  | 51.6   | y1y2y5y6y8y9                                                                    | 1169.66 | 56.999  | 32708  | 2 | 585.33  | -4.49  |
| P66313 RL6_SALTY 50S ribosomal protein L6    | 10 |  | LQLVGVGYSR                                   | 86  | 9  | 3  | 31.3   | b3y5y7                                                                          | 1004.58 | 59.254  | 32599  | 2 | 502.79  | -9.78  |
| P66313 RL6_SALTY 50S ribosomal protein L6    | 11 |  | RPEPYK                                       | 152 | 6  | 1  | 13.9   | b3                                                                              | 789.44  | 34.083  | 4681   | 2 | 395.22  | 13.38  |
| P66313 RL6_SALTY 50S ribosomal protein L6    | 12 |  | GADKQVIGQVAADLR                              | 134 | 15 | 6  | 60.92  | b3b9y3y4y5y6                                                                    | 1540.82 | 58.016  | 35298  | 3 | 514.28  | -13.31 |
| P66313 RL6_SALTY 50S ribosomal protein L6    | 13 |  | KLQLVGVGYSR                                  | 85  | 10 | 6  | 76.06  | b4y3y4y5y6y8                                                                    | 1132.68 | 52.530  | 13821  | 2 | 566.84  | -6.47  |
| Q8ZLD7 UA_SALTY Universal stress protein A   | 1  |  | ISEETHHALTELSTNAGYPITETLS<br>GSGDLGQVLVDAIK  | 61  | 39 | 11 | 43.23  | b2b12°b12b18b22y4y5y6y<br>11y15y39                                              | 4067.04 | 97.456  | 169081 | 4 | 1017.52 | -0.48  |
| Q8ZLD7 UA_SALTY Universal stress protein A   | 2  |  | QLINTVHVDMLIVPLRDEEE                         | 124 | 20 | 16 | 118.06 | b10b11°b11b13°b13b20y1<br>y6y7y8y9y11y12y13y14y2<br>0                           | 2363.21 | 86.300  | 124250 | 3 | 788.41  | -5.58  |
| Q8ZLD7 UA_SALTY Universal stress protein A   | 3  |  | AVSMARPYNAK                                  | 22  | 11 | 16 | 66.61  | b2b3°b3b8°b9°b9b10y1y5*<br>y5y7*y7y9°y9*y9y11                                   | 1207.62 | 30.687  | 67391  | 2 | 604.31  | -6.37  |
| Q8ZLD7 UA_SALTY Universal stress protein A   | 4  |  | ISEETHHALTELSTNAGYPITETLS<br>GSGDLGQVLVDAIKK | 61  | 40 | 4  | 12.33  | b12b22y4y22                                                                     | 4195.14 | 93.868  | 45637  | 4 | 1049.54 | -1.05  |
| Q8ZLD7 UA_SALTY Universal stress protein A   | 5  |  | ISLIHVDVNYSDLYTGLIDVNLGD<br>MQK              | 33  | 27 | 3  | 12.23  | b11y5y8                                                                         | 3035.50 | 104.068 | 2420   | 3 | 1012.51 | -11.50 |
| Q8ZLD7 UA_SALTY Universal stress protein A   | 6  |  | VLVEK                                        | 17  | 5  | 1  | 13.53  | y3                                                                              | 587.38  | 40.641  | 5597   | 1 | 587.38  | 4.26   |
| Q8ZLD7 UA_SALTY Universal stress protein A   | 7  |  | LMSSAR                                       | 118 | 6  | 2  | 13.9   | b4°b4                                                                           | 664.34  | 36.849  | 2447   | 1 | 664.34  | 0.18   |
| Q8ZLD7 UA_SALTY Universal stress protein A   | 8  |  | AYKHILIAVDLSPESK                             | 1   | 16 | 3  | 35.19  | y8y9y10                                                                         | 1784.01 | 77.158  | 9245   | 3 | 595.34  | 8.69   |
| Q8ZLD7 UA_SALTY Universal stress protein A   | 9  |  | SMARPYNAK                                    | 24  | 9  | 3  | 32.05  | b4b6b7                                                                          | 1037.51 | 30.688  | 71202  | 2 | 519.26  | -9.06  |
| Q8ZLD7 UA_SALTY Universal stress protein A   | 10 |  | VSMARPYNAK                                   | 23  | 10 | 2  | 8.01   | b3°b3                                                                           | 1136.58 | 30.686  | 7697   | 2 | 568.80  | -4.08  |
| Q8ZLD7 UA_SALTY Universal stress protein A   | 11 |  | AVSMARPYNAK                                  | 22  | 11 | 0  | 2.26   |                                                                                 | 1189.59 | 30.689  | 3626   | 3 | 397.20  | -14.47 |
| Q8ZKP1 ZAPB_SALTY Cell division protein zapB | 1  |  | VQQAIDTITLLQMEIEELKEK                        | 12  | 21 | 25 | 219.77 | b2b3b4°b4b5y2°y2y3y4y5<br>y6y8y9y10°y10y11°y11y1<br>2y13y15y16y17y18y21*y2<br>1 | 2472.32 | 98.351  | 177137 | 3 | 824.78  | -0.99  |
| Q8ZKP1 ZAPB_SALTY Cell division protein zapB | 2  |  | NNSLTQEVQSAQHQR                              | 33  | 15 | 6  | 30.4   | b9y3*y3y8y9y15                                                                  | 1739.82 | 40.224  | 42046  | 3 | 580.61  | -12.91 |
| Q8ZKP1 ZAPB_SALTY Cell division protein zapB | 3  |  | EKNNSLTQEVQSAQHQR                            | 31  | 17 | 4  | 23.9   | b11b12°b12y15                                                                   | 1996.97 | 89.500  | 29858  | 3 | 666.33  | -5.32  |
| Q8ZKP1 ZAPB_SALTY Cell division protein zapB | 4  |  | EELERENNSLK                                  | 48  | 11 | 4  | 36.37  | b3b6y6y9                                                                        | 1360.67 | 82.041  | 11152  | 2 | 680.84  | -0.45  |
| P0A2A3 RL1_SALTY 50S ribosomal protein L1    | 1  |  | VVGQLGQVLGPR                                 | 122 | 12 | 10 | 83.8   | b1b2y3y5y6y7y8y10°y10y<br>12                                                    | 1222.72 | 58.865  | 132199 | 2 | 611.86  | -7.79  |
| P0A2A3 RL1_SALTY 50S ribosomal protein L1    | 2  |  | VGTVPNVAEAVK                                 | 141 | 13 | 11 | 80.9   | b3°b3y3y8y9°y9y10y11y12<br>*y12y13                                              | 1284.71 | 47.936  | 89939  | 2 | 642.86  | -3.33  |
| P0A2A3 RL1_SALTY 50S ribosomal protein L1    | 3  |  | VAVFTQGPNAEAAK                               | 74  | 14 | 11 | 88.39  | b3b4b6y7y8y9°y9y10°y10y<br>11y14                                                | 1402.73 | 45.093  | 83230  | 2 | 701.87  | 0.26   |
| P0A2A3 RL1_SALTY 50S ribosomal protein L1    | 4  |  | QYDINEAIALLK                                 | 19  | 12 | 18 | 105.81 | b2°b2b3°b3b4°b4°b4b9b1<br>1b12y1y2y3y4y5y6y8y12                                 | 1390.76 | 84.952  | 67155  | 2 | 695.88  | -1.84  |
| P0A2A3 RL1_SALTY 50S ribosomal protein L1    | 5  |  | AAGAELVGMEDLADQIK                            | 88  | 17 | 15 | 114.84 | b2b3b5°b5b6b7b12y4y9y1<br>0y11y12y13*y13y17                                     | 1730.88 | 79.617  | 34854  | 2 | 865.94  | 7.05   |
| P0A2A3 RL1_SALTY 50S ribosomal protein L1    | 6  |  | GATVLPHTGTR                                  | 60  | 11 | 7  | 66.89  | y2y4y5y6y7y9y11                                                                 | 1065.57 | 29.171  | 21402  | 2 | 533.29  | -5.84  |

|                                            |    |                    |                                      |     |    |    |        |                                                   |         |         |        |   |         |        |
|--------------------------------------------|----|--------------------|--------------------------------------|-----|----|----|--------|---------------------------------------------------|---------|---------|--------|---|---------|--------|
| P0A2A3 RL1_SALTY 50S ribosomal protein L1  | 7  |                    | GEMNFDVVIASPDAMR                     | 106 | 16 | 5  | 39.12  | b13y5y9y11y12                                     | 1751.80 | 71.534  | 8940   | 3 | 584.60  | -7.46  |
| P0A2A3 RL1_SALTY 50S ribosomal protein L1  | 8  |                    | ELATAK                               | 31  | 6  | 2  | 13.9   | b5°b5                                             | 632.35  | 28.141  | 6520   | 1 | 632.35  | -13.22 |
| P0A2A3 RL1_SALTY 50S ribosomal protein L1  | 9  |                    | NGIHTTIGK                            | 167 | 10 | 4  | 27.7   | b3b8°b8y3                                         | 1053.60 | 38.709  | 3443   | 2 | 527.30  | -5.45  |
| P0A2A3 RL1_SALTY 50S ribosomal protein L1  | 10 |                    | SDQNVR                               | 54  | 6  | 1  | 13.9   | y4                                                | 718.35  | 59.576  | 2754   | 1 | 718.35  | -1.70  |
| P0A2A3 RL1_SALTY 50S ribosomal protein L1  | 11 |                    | VSISTTMGAGVAVDQAGLSASAN              | 211 | 23 | 3  | 13.48  | b7y8y10                                           | 2107.03 | 55.866  | 1705   | 3 | 703.02  | -1.39  |
| P0A2A3 RL1_SALTY 50S ribosomal protein L1  | 12 |                    | KGEMNFDVVIASPDAMR                    | 105 | 17 | 4  | 37.84  | b5y7y8y9                                          | 1879.89 | 67.448  | 4726   | 2 | 940.45  | -5.91  |
| P0A2A3 RL1_SALTY 50S ribosomal protein L1  | 13 |                    | SDQNVRGATVLPHGTR                     | 54  | 17 | 4  | 16.91  | b5°b5b13y4                                        | 1764.91 | 75.952  | 4417   | 3 | 588.98  | 1.31   |
| P0A2A3 RL1_SALTY 50S ribosomal protein L1  | 14 | Oxidation+M(7)     | VSISTTMGAGVAVDQAGLSASAN              | 211 | 23 | 12 | 72.39  | b7b9b10°b10y4*y4y7y9y11*y11y14y20                 | 2123.06 | 74.614  | 25800  | 3 | 708.36  | 14.49  |
| P0A2A3 RL1_SALTY 50S ribosomal protein L1  | 15 | Oxidation+M(9)     | AAGAEVGMEDLADQIKK                    | 88  | 18 | 3  | 25.07  | b5b6b13                                           | 1874.97 | 75.116  | 18867  | 3 | 625.66  | 9.70   |
| P0A2A3 RL1_SALTY 50S ribosomal protein L1  | 16 |                    | TVLPHGTR                             | 62  | 9  | 0  | 2.26   |                                                   | 937.51  | 29.172  | 20219  | 2 | 469.26  | -7.88  |
| P0A2A3 RL1_SALTY 50S ribosomal protein L1  | 17 |                    | VLPHGTR                              | 63  | 8  | 0  | 2.26   |                                                   | 836.46  | 29.173  | 5727   | 2 | 418.73  | -14.81 |
| P67093 UG_SALTY Universal stress protein G | 1  |                    | HATLPVLVVR                           | 132 | 10 | 13 | 74.02  | b1b2b3°b3b4y1y2y4y7y8°y8y9y10                     | 1104.68 | 59.715  | 77765  | 2 | 552.84  | -8.40  |
| P67093 UG_SALTY Universal stress protein G | 2  |                    | NPSITTHLLGSNASSVVR                   | 114 | 18 | 17 | 99.55  | b2°b2b6b7°b7b10y5y8y9*y9y10*y10y11y12y14y18*y18   | 1852.96 | 58.285  | 59836  | 3 | 618.33  | -12.65 |
| P67093 UG_SALTY Universal stress protein G | 3  |                    | TIIMPVDVFEMELSDK                     | 3   | 16 | 7  | 36.68  | b2b3b4b12y1y12y14                                 | 1866.94 | 104.248 | 52595  | 2 | 933.97  | 7.58   |
| P67093 UG_SALTY Universal stress protein G | 4  |                    | FGSVRDVVNEMGEELDADVVGSR              | 89  | 25 | 3  | 12.79  | b6y5y10                                           | 2692.34 | 102.550 | 5105   | 3 | 898.12  | 5.71   |
| P67093 UG_SALTY Universal stress protein G | 5  |                    | LQTMVGHFSIDPSR                       | 69  | 14 | 15 | 114.65 | b4°b4°b4b5b11°b11y3°y3y4°y4y5y6y7y11y12           | 1587.77 | 63.061  | 84601  | 3 | 529.93  | -17.76 |
| P67093 UG_SALTY Universal stress protein G | 6  |                    | FGSVRDVVNEMGEELDADVVGSR              | 89  | 25 | 3  | 23.27  | b5b6b10                                           | 2692.30 | 123.861 | 121316 | 3 | 898.11  | -7.44  |
| P67093 UG_SALTY Universal stress protein G | 7  |                    | DVVNEMGEELDADVVGSRNPSITTHLLGSNASSVVR | 94  | 38 | 5  | 25.7   | b3b4°b4b10b33                                     | 3980.01 | 102.598 | 110691 | 4 | 995.76  | 2.09   |
| P67093 UG_SALTY Universal stress protein G | 8  |                    | MYKTIIMPVDVFEMELSDK                  | 0   | 19 | 5  | 23.26  | b3y8°y8y9°y9                                      | 2289.15 | 81.472  | 12433  | 2 | 1145.08 | 12.05  |
| P67093 UG_SALTY Universal stress protein G | 9  |                    | FEEHLQHEAETRLQTMVGHFSIDPSR           | 57  | 26 | 3  | 12.49  | b9y4y9                                            | 3094.50 | 77.518  | 1659   | 3 | 1032.17 | 5.52   |
| P67093 UG_SALTY Universal stress protein G | 10 | Oxidation+M(24)    | HAFLAQDQGVHLLHVLPGSASMSLHR           | 22  | 28 | 4  | 15.51  | b9b12y8y20                                        | 3079.63 | 137.308 | 38594  | 3 | 1027.21 | 11.89  |
| P67093 UG_SALTY Universal stress protein G | 11 | Oxidation+M(4)     | LQTMVGHFSIDPSR                       | 69  | 14 | 4  | 27.74  | y9°y9y10y12                                       | 1603.79 | 55.744  | 2103   | 3 | 535.27  | 1.14   |
| Q8ZQS2 GPMA_SALTY 2                        | 1  |                    | AIHTLWNVLDELQAWLPVEK                 | 62  | 21 | 20 | 122.42 | b2b3b4b5b6b7b8°b8b11b16°b17y1y2°y2y4°y4y5y6y12y21 | 2490.29 | 117.075 | 42280  | 3 | 830.77  | -3.82  |
| Q8ZQS2 GPMA_SALTY 2                        | 2  |                    | LSEKELPLTESLALTIDR                   | 142 | 18 | 3  | 16.15  | b3b5y4                                            | 2028.11 | 82.408  | 23035  | 3 | 676.71  | -6.26  |
| Q8ZQS2 GPMA_SALTY 2                        | 3  |                    | VIIAAHGNSLR                          | 178 | 11 | 8  | 66.89  | b2y1y5y6y7y8y9y11                                 | 1150.66 | 36.729  | 16115  | 2 | 575.83  | -6.37  |
| Q8ZQS2 GPMA_SALTY 2                        | 4  |                    | HYGALQGLNK                           | 90  | 10 | 4  | 52.98  | b4b5b6b9                                          | 1100.57 | 57.986  | 3153   | 2 | 550.79  | -17.41 |
| Q8ZQS2 GPMA_SALTY 2                        | 5  |                    | AETAEK                               | 100 | 6  | 1  | 13.9   | y3                                                | 648.31  | 83.008  | 1724   | 1 | 648.31  | -8.47  |
| Q8ZQS2 GPMA_SALTY 2                        | 6  |                    | MAVTK                                | 0   | 5  | 1  | 13.53  | b3                                                | 549.30  | 23.525  | 1564   | 1 | 549.30  | -4.78  |
| Q8ZQS2 GPMA_SALTY 2                        | 7  |                    | AETAEKYGDEQVK                        | 100 | 13 | 3  | 26.12  | b4y6y7                                            | 1467.72 | 68.349  | 1615   | 2 | 734.36  | 14.72  |
| Q8ZQS2 GPMA_SALTY 2                        | 8  | Phosphoryl STY(10) | GFAVTPPELTKDDER                      | 117 | 15 | 5  | 30.4   | b5b6°b6b9y5                                       | 1754.80 | 38.754  | 4316   | 3 | 585.60  | 3.76   |
| Q8ZQS2 GPMA_SALTY 2                        | 9  |                    | IAAHGNSLR                            | 180 | 9  | 1  | 8.01   | b3                                                | 938.51  | 36.716  | 16447  | 2 | 469.76  | -10.21 |

|                                              |    |                      |                                   |     |    |    |        |                                      |         |         |        |   |         |        |
|----------------------------------------------|----|----------------------|-----------------------------------|-----|----|----|--------|--------------------------------------|---------|---------|--------|---|---------|--------|
| IP0446 RL3_SALTY 50S ribosomal protein L3    | 1  |                      | VTVQSLDVVR                        | 169 | 10 | 15 | 115.85 | b2b5b7b8y2y3y4y5y6°y6y7°y7*y7y8y10   | 1115.64 | 56.342  | 86751  | 2 | 558.32  | -5.91  |
| IP0446 RL3_SALTY 50S ribosomal protein L3    | 2  |                      | IFTEDGVSIPTVIEVEANR               | 13  | 20 | 15 | 92.35  | b2b4b7b9°b9y3y4°y4y5y6°y6y7y11y13y20 | 2188.17 | 88.102  | 59814  | 2 | 1094.59 | 11.49  |
| IP0446 RL3_SALTY 50S ribosomal protein L3    | 3  | Carbamidomethyl+C(9) | GGVPGATGCDLIVKPAVK                | 190 | 18 | 6  | 35.79  | b2y4y6y8y15y18                       | 1738.93 | 53.828  | 28656  | 3 | 580.31  | -14.25 |
| IP0446 RL3_SALTY 50S ribosomal protein L3    | 4  |                      | LAEGEETVQGSISVELFADVKK            | 83  | 23 | 9  | 29.55  | b2b3b6°b6b11b17°b17y1y23             | 2512.27 | 117.073 | 17922  | 3 | 838.10  | -4.08  |
| IP0446 RL3_SALTY 50S ribosomal protein L3    | 5  |                      | DLANDGYR                          | 38  | 8  | 11 | 50.47  | b2°b2b5°b5b8y3y4°y4y6°y6y8           | 923.42  | 31.195  | 15059  | 2 | 462.22  | 3.44   |
| IP0446 RL3_SALTY 50S ribosomal protein L3    | 6  |                      | VTKPEAGHFAK                       | 59  | 11 | 8  | 83.43  | y3y4y6y7°y7y8°y8y9                   | 1184.62 | 23.436  | 35486  | 3 | 395.54  | -20.30 |
| IP0446 RL3_SALTY 50S ribosomal protein L3    | 7  |                      | NLLLVK                            | 184 | 6  | 5  | 68.01  | b3b4y3y4y5                           | 699.47  | 55.801  | 21994  | 1 | 699.47  | -7.59  |
| IP0446 RL3_SALTY 50S ribosomal protein L3    | 8  |                      | GLWEFR                            | 77  | 6  | 1  | 13.9   | b3                                   | 807.41  | 61.597  | 6974   | 1 | 807.41  | -2.19  |
| IP0446 RL3_SALTY 50S ribosomal protein L3    | 9  |                      | VPGSIGQNQTGPK                     | 141 | 13 | 5  | 30.59  | y3y7y12°y12*y12                      | 1282.69 | 57.741  | 4236   | 2 | 641.85  | 14.37  |
| IP0446 RL3_SALTY 50S ribosomal protein L3    | 10 |                      | VDAER                             | 179 | 5  | 1  | 13.53  | b3                                   | 589.29  | 61.482  | 3546   | 1 | 589.29  | -0.52  |
| IP0446 RL3_SALTY 50S ribosomal protein L3    | 11 | Carbamidomethyl+C(9) | GGVPGATGCDLIVKPAVKA               | 190 | 19 | 7  | 64.5   | b14y5y6y7y8y12y16                    | 1809.97 | 56.031  | 83896  | 3 | 603.99  | -10.66 |
| IP0446 RL3_SALTY 50S ribosomal protein L3    | 12 |                      | ANRVTKPEAGHFAK                    | 56  | 14 | 3  | 25.4   | b3b4y5                               | 1525.81 | 53.827  | 6386   | 3 | 509.27  | -9.44  |
| IP0446 RL3_SALTY 50S ribosomal protein L3    | 13 |                      | VTVQSLDVVRVDAER                   | 169 | 15 | 4  | 38.85  | b5b6b7y3                             | 1685.93 | 103.625 | 4023   | 2 | 843.47  | 4.34   |
| IP0446 RL3_SALTY 50S ribosomal protein L3    | 14 |                      | LAEGEETVQGSISVELFADVKK            | 83  | 23 | 4  | 37.68  | b3b10b11b12                          | 2512.28 | 90.245  | 3963   | 4 | 628.82  | -2.33  |
| IP0446 RL3_SALTY 50S ribosomal protein L3    | 15 |                      | DLANDGYRAVQVTTGAK                 | 38  | 17 | 3  | 24.32  | b4b8b10                              | 1778.88 | 50.583  | 2356   | 3 | 593.63  | -10.50 |
| IP0A297 RL10_SALTY 50S ribosomal protein L10 | 1  |                      | LATLPTYEEAIAR                     | 125 | 13 | 12 | 80.9   | b2b3°b3b13y2y4y5y8y9y10y11y13        | 1447.78 | 64.924  | 98548  | 2 | 724.39  | -2.87  |
| IP0A297 RL10_SALTY 50S ribosomal protein L10 | 2  |                      | AAAFEGELIPASQIDR                  | 109 | 16 | 15 | 137.23 | b4b5b6b8°b8b9y2y5y6y7y8y9y11y12y16   | 1687.87 | 68.431  | 75453  | 2 | 844.44  | 1.08   |
| IP0A297 RL10_SALTY 50S ribosomal protein L10 | 3  |                      | QAIVAEVSEVAK                      | 8   | 12 | 6  | 33.22  | b2b12y5y8y10y12                      | 1243.68 | 56.992  | 40507  | 2 | 622.35  | -3.73  |
| IP0A297 RL10_SALTY 50S ribosomal protein L10 | 4  |                      | DTFVGPTLIAYSMHEPGAAAR             | 73  | 21 | 7  | 27.85  | b3°b3b8b10y6y12y21                   | 2204.07 | 82.424  | 13874  | 3 | 735.36  | -4.87  |
| IP0A297 RL10_SALTY 50S ribosomal protein L10 | 5  |                      | EAGVYMR                           | 46  | 7  | 4  | 38.33  | b3y4y5y7                             | 825.39  | 31.179  | 5931   | 2 | 413.20  | -8.65  |
| IP0A297 RL10_SALTY 50S ribosomal protein L10 | 6  |                      | GALSAVVADSR                       | 20  | 11 | 4  | 25.06  | b3b10°b10y5                          | 1045.55 | 35.915  | 179108 | 2 | 523.28  | -8.52  |
| IP0A297 RL10_SALTY 50S ribosomal protein L10 | 7  |                      | LMATMK                            | 138 | 6  | 1  | 13.9   | b5                                   | 694.37  | 40.545  | 12488  | 1 | 694.37  | 9.67   |
| IP0A297 RL10_SALTY 50S ribosomal protein L10 | 8  |                      | TLA AVR                           | 153 | 6  | 3  | 27.43  | b3°b3y5                              | 630.40  | 50.490  | 7318   | 1 | 630.40  | 12.97  |
| IP0A297 RL10_SALTY 50S ribosomal protein L10 | 9  |                      | GVTVDK                            | 31  | 6  | 1  | 13.9   | b5                                   | 618.35  | 71.054  | 3149   | 1 | 618.35  | 13.62  |
| IP0A297 RL10_SALTY 50S ribosomal protein L10 | 10 | Carbamidomethyl+C(9) | VVEGTQFECLKDTFVGPTLIAYSM EHPGAAAR | 62  | 32 | 4  | 16.36  | b10y7y10y17                          | 3494.70 | 92.108  | 63807  | 4 | 874.43  | -3.07  |
| IP0A297 RL10_SALTY 50S ribosomal protein L10 | 11 |                      | ALNLQDKQAIVA EVSEVAK              | 1   | 19 | 4  | 24.66  | y3y8°y8y9                            | 2026.09 | 71.079  | 14260  | 3 | 676.04  | -13.07 |
| IP0A297 RL10_SALTY 50S ribosomal protein L10 | 12 |                      | MALNLQDKQAIVA EVSEVAK             | 0   | 20 | 3  | 24.31  | b6b7b19                              | 2157.14 | 57.584  | 8756   | 3 | 719.72  | -7.24  |
| IP0A297 RL10_SALTY 50S ribosomal protein L10 | 13 |                      | AAAFEGELIPASQIDRLATLPTYEE AIAR    | 109 | 29 | 3  | 11.8   | b11y6y12                             | 3116.60 | 99.885  | 7120   | 3 | 1039.54 | -9.64  |
| IP0A297 RL10_SALTY 50S ribosomal protein L10 | 14 |                      | DTFVGPTLIAYSMHEPGAAARL FK         | 73  | 24 | 3  | 23.4   | b5b7b8                               | 2592.29 | 59.630  | 2198   | 3 | 864.77  | -14.50 |

|                                             |    |                                          |                                      |     |    |    |        |                                   |         |         |       |   |         |        |
|---------------------------------------------|----|------------------------------------------|--------------------------------------|-----|----|----|--------|-----------------------------------|---------|---------|-------|---|---------|--------|
| P0A297 RL10_SALTY 50S ribosomal protein L10 | 15 | Carbamidomethyl+C(9); Phosphoryl STY(13) | VVEGTQFECLKDTFVGPTLIAYSMEHPGAAAR     | 62  | 32 | 6  | 28.4   | b4b8b11b12_H3PO4 b12y5y17         | 3574.66 | 109.941 | 4785  | 5 | 715.74  | -1.98  |
| P0A297 RL10_SALTY 50S ribosomal protein L10 | 16 | Phosphoryl STY(3)                        | LATLPTYEEAIAR                        | 125 | 13 | 6  | 35.09  | b5°b5y7y9y11°y11                  | 1527.71 | 136.535 | 1509  | 1 | 1527.71 | -14.30 |
| P0A297 RL10_SALTY 50S ribosomal protein L10 | 17 | Oxidation+M(13)                          | DTFVGPTLIAYSMEHPGAAAR                | 73  | 21 | 6  | 30.86  | b4°b4b8y6y7y12                    | 2220.09 | 115.284 | 6674  | 3 | 740.70  | 7.59   |
| P0A297 RL10_SALTY 50S ribosomal protein L10 | 18 | Oxidation+M(2)                           | LMATMKEASAGK                         | 138 | 12 | 4  | 37.21  | b6b7y8y11                         | 1253.63 | 45.439  | 5162  | 2 | 627.32  | 6.82   |
| Q7CR87 SURA_SALTY Chaperone surA            | 1  |                                          | IQELPGIFAQALSTAK                     | 235 | 16 | 12 | 45.71  | b1b2*b2b3*b3b4*b15y2y12y13y14y16  | 1686.95 | 89.740  | 58105 | 2 | 843.98  | 3.84   |
| Q7CR87 SURA_SALTY Chaperone surA            | 2  |                                          | ITVLPQEVDALAK                        | 149 | 13 | 9  | 62.72  | b3°b3b4y2y5y9y10y11y13            | 1396.80 | 70.399  | 51589 | 2 | 698.90  | -3.58  |
| Q7CR87 SURA_SALTY Chaperone surA            | 3  |                                          | LNAGQAGQQLPDDATLR                    | 50  | 17 | 8  | 62.47  | b2y4y7y8y9y11y12y17               | 1767.90 | 50.768  | 49064 | 2 | 884.45  | 2.07   |
| Q7CR87 SURA_SALTY Chaperone surA            | 4  |                                          | ITDEQLDQAIANIAK                      | 90  | 15 | 8  | 41.2   | b10°b10*b10y4y5y10y13y15          | 1642.87 | 80.202  | 47938 | 2 | 821.94  | 3.57   |
| Q7CR87 SURA_SALTY Chaperone surA            | 5  |                                          | LAYDGLNYSTYR                         | 117 | 12 | 10 | 75.35  | b10°b10y3y6y8°y8*y8y10y11y12      | 1435.69 | 58.189  | 43112 | 2 | 718.35  | 4.08   |
| Q7CR87 SURA_SALTY Chaperone surA            | 6  |                                          | QIGTQNDASTELNLSHILIALPENPTSEQVNDAQR  | 162 | 35 | 12 | 28.41  | b2*b2b3b12b21y3*y3y5y9°y9y14y35   | 3816.94 | 88.651  | 39279 | 3 | 1272.99 | 11.39  |
| Q7CR87 SURA_SALTY Chaperone surA            | 7  |                                          | HILLKPSPIMNDQQAR                     | 288 | 16 | 8  | 50.33  | b3b5y4y7y9y11°y11*y11             | 1860.99 | 48.421  | 33495 | 3 | 621.00  | -13.58 |
| Q7CR87 SURA_SALTY Chaperone surA            | 8  |                                          | QAESIVEEAR                           | 197 | 10 | 10 | 88.8   | b4b8b10y2y4y5y6y8y9y10            | 1131.56 | 37.837  | 25945 | 2 | 566.28  | -7.66  |
| Q7CR87 SURA_SALTY Chaperone surA            | 9  |                                          | VAAVVNNGVVLESDDVGLMQSVK              | 27  | 23 | 8  | 34.64  | b2b3b4y3y8y10°y10y23              | 2343.20 | 90.933  | 22480 | 3 | 781.74  | -8.54  |
| Q7CR87 SURA_SALTY Chaperone surA            | 10 |                                          | GQSQSISVTEVHAR                       | 274 | 14 | 6  | 56.26  | y3y5y6y8y9y14                     | 1498.74 | 36.535  | 19184 | 3 | 500.25  | -14.09 |
| Q7CR87 SURA_SALTY Chaperone surA            | 11 |                                          | LAITYSADQQALK                        | 214 | 13 | 4  | 21.35  | b9y5y10y13                        | 1421.76 | 54.438  | 10941 | 2 | 711.38  | -5.67  |
| Q7CR87 SURA_SALTY Chaperone surA            | 12 |                                          | GQISAPVHSSFGWHLIELLDTR               | 362 | 22 | 4  | 27.69  | b4b10y10y11                       | 2463.27 | 87.678  | 5973  | 3 | 821.76  | -4.56  |
| Q7CR87 SURA_SALTY Chaperone surA            | 13 |                                          | TTFAAAAKEYSQDPGSANQGGDLGWATPDIFDPAFR | 318 | 36 | 3  | 10.98  | b12y10y12                         | 3772.77 | 90.915  | 2080  | 3 | 1258.26 | 4.72   |
| Q7CR87 SURA_SALTY Chaperone surA            | 14 |                                          | HQILER                               | 67  | 6  | 2  | 27.43  | y4y5                              | 795.45  | 24.706  | 15103 | 2 | 398.23  | -2.53  |
| Q7CR87 SURA_SALTY Chaperone surA            | 15 |                                          | EYSQDPGSANQGGDLGWATPDIFDPAFR         | 326 | 28 | 4  | 36.99  | y3y4y5y8                          | 3011.38 | 93.561  | 10607 | 3 | 1004.46 | 10.38  |
| Q7CR87 SURA_SALTY Chaperone surA            | 16 |                                          | LEEIAADIK                            | 306 | 9  | 3  | 31.3   | b5b8y8                            | 1001.55 | 39.291  | 1571  | 2 | 501.28  | -2.32  |
| Q7CR87 SURA_SALTY Chaperone surA            | 17 |                                          | LAITYSADQQALKGGQMGWGR                | 214 | 21 | 11 | 147.05 | y3y4y6y8y9y11y12y15y16y18y19      | 2251.12 | 64.776  | 30415 | 3 | 751.05  | -3.69  |
| Q7CR87 SURA_SALTY Chaperone surA            | 18 |                                          | KGDIVGPIR                            | 251 | 9  | 6  | 76.65  | b4y4y5y6y7y8                      | 954.56  | 37.261  | 21943 | 2 | 477.79  | -10.10 |
| Q7CR87 SURA_SALTY Chaperone surA            | 19 |                                          | GGQMGWGRIQELPGIFAQALSTAK             | 227 | 24 | 3  | 23.4   | b4b9b10                           | 2516.34 | 84.360  | 8047  | 4 | 629.84  | 10.87  |
| Q7CR87 SURA_SALTY Chaperone surA            | 20 |                                          | LNAGQAGQQLPDDATLRHQILER              | 50  | 23 | 3  | 19.89  | b3b5b11                           | 2544.34 | 75.815  | 4787  | 3 | 848.78  | 4.03   |
| Q7CR87 SURA_SALTY Chaperone surA            | 21 |                                          | KFSEEATWMQEQR                        | 404 | 14 | 3  | 27.74  | b5b6b9                            | 1740.80 | 76.869  | 2879  | 2 | 870.90  | -1.75  |
| Q7CR87 SURA_SALTY Chaperone surA            | 22 |                                          | LNAGQAGQQLPDDATL                     | 50  | 16 | 0  | 4.53   |                                   | 1611.78 | 50.751  | 6214  | 2 | 806.40  | -8.56  |
| Q7CR87 SURA_SALTY Chaperone surA            | 23 |                                          | GQSQSISVTEVHAR                       | 274 | 14 | 0  | 3.4    |                                   | 1481.72 | 36.522  | 2026  | 3 | 494.58  | -6.76  |
| Q8ZRP4 DAPD_SALTY 2                         | 1  |                                          | MQQLQNVIAFER                         | 0   | 14 | 9  | 68.84  | b3b10y3y7y9y10*y10y11y14          | 1706.85 | 85.735  | 70530 | 2 | 853.93  | 0.29   |
| Q8ZRP4 DAPD_SALTY 2                         | 2  |                                          | EAVNQVISLLDSGALR                     | 28  | 16 | 13 | 66.08  | b4°b4*b4b6°b6°b6y4y5y6°y6y9y10y16 | 1684.92 | 91.845  | 43339 | 2 | 842.97  | 0.14   |



|                                                 |    |                       |                                         |     |    |    |        |                                                                                               |         |         |        |   |         |        |
|-------------------------------------------------|----|-----------------------|-----------------------------------------|-----|----|----|--------|-----------------------------------------------------------------------------------------------|---------|---------|--------|---|---------|--------|
| Q8ZRP4 DAPD_SALTY 2                             | 3  |                       | INDNQVIDGAESR                           | 68  | 13 | 12 | 83.91  | b2b3y1y5y6y7°y7y8y9°y9y10y13                                                                  | 1430.69 | 40.954  | 22477  | 2 | 715.85  | 0.34   |
| Q8ZRP4 DAPD_SALTY 2                             | 4  |                       | FADYDEAR                                | 89  | 8  | 6  | 68.77  | y2y3y4y5y6y7                                                                                  | 986.41  | 34.061  | 13829  | 2 | 493.71  | -8.48  |
| Q8ZRP4 DAPD_SALTY 2                             | 5  |                       | QQLQNVIAFER                             | 1   | 13 | 3  | 30.59  | y4y8y11                                                                                       | 1575.79 | 66.966  | 8777   | 3 | 525.94  | -12.47 |
| Q8ZRP4 DAPD_SALTY 2                             | 6  |                       | VPAGSVVVSGNLPSKDGK                      | 226 | 18 | 5  | 16.15  | b5y2y10y17y18                                                                                 | 1710.95 | 43.485  | 5885   | 2 | 855.98  | 4.99   |
| Q8ZRP4 DAPD_SALTY 2                             | 7  |                       | IDGQWVTHQWLK                            | 48  | 12 | 5  | 30.21  | b4b5b9b12*b12                                                                                 | 1510.79 | 98.629  | 3354   | 3 | 504.27  | 9.13   |
| Q8ZRP4 DAPD_SALTY 2                             | 8  | Carbamidomethyl+C(30) | NTVLMPSYVVGAYVDEGTMVD<br>TWATVGSQAQIGK  | 119 | 35 | 3  | 11.04  | b6y10y18                                                                                      | 3747.80 | 110.650 | 3862   | 4 | 937.71  | 8.73   |
| Q8ZRP4 DAPD_SALTY 2                             | 9  |                       | SEVVEGVIVEEGSVISMGVYLGQS<br>TK          | 187 | 26 | 4  | 28.14  | b4b10b12b13                                                                                   | 2696.40 | 100.796 | 2936   | 3 | 899.47  | 12.40  |
| Q8ZRP4 DAPD_SALTY 2                             | 10 | Carbamidomethyl+C(28) | NVHLSGGVGIGGVLEPLQANPTIIE<br>DNCFIGAR   | 154 | 33 | 6  | 29.74  | b5b9b12*b12y6y7                                                                               | 3417.70 | 119.947 | 1699   | 4 | 855.18  | -17.50 |
| Q8ZRP4 DAPD_SALTY 2                             | 11 |                       | RADITPANVDTVTR                          | 14  | 14 | 5  | 28.56  | b3°b3b7y12                                                                                    | 1528.80 | 56.587  | 49069  | 3 | 510.27  | -6.47  |
| Q8ZRP4 DAPD_SALTY 2                             | 12 |                       | MQQLQNVIAFER                            | 0   | 15 | 6  | 26.87  | b4*b4b5b12°b12*b12                                                                            | 1862.94 | 64.901  | 20562  | 3 | 621.65  | -6.42  |
| Q8ZRP4 DAPD_SALTY 2                             | 13 |                       | YFDKVPKM                                | 81  | 8  | 4  | 52.23  | b6b7y3y6                                                                                      | 1027.52 | 42.391  | 17389  | 2 | 514.26  | -10.69 |
| Q8ZRP4 DAPD_SALTY 2                             | 14 |                       | IYDRETGEVHYGR                           | 213 | 13 | 5  | 44.42  | b4b6b12y3y9                                                                                   | 1594.77 | 57.041  | 10734  | 3 | 532.26  | 5.28   |
| Q8ZRP4 DAPD_SALTY 2                             | 15 |                       | ETGEVHYGRVPAGSVVVSGNLPS<br>K            | 217 | 24 | 3  | 13.11  | b5b13y23                                                                                      | 2439.27 | 110.541 | 4540   | 3 | 813.76  | 1.60   |
| Q8ZRP4 DAPD_SALTY 2                             | 16 | Phosphoryl STY(5)     | VPAGSVVVSGNLPSK                         | 226 | 15 | 4  | 32.78  | b3b4y11y13_H3PO4 y13                                                                          | 1490.76 | 72.301  | 11399  | 2 | 745.88  | 3.60   |
| Q8ZRP4 DAPD_SALTY 2                             | 17 |                       | VPAGSVVVS                               | 226 | 9  | 0  | 4.9    |                                                                                               | 814.47  | 43.498  | 9941   | 2 | 407.74  | 0.45   |
| Q8ZP65 TPX_SALTY Probable thiol<br>peroxidase   | 1  |                       | SQTVHFQGNPVTVANVIPQAGSK                 | 1   | 23 | 22 | 156.32 | b2b3b5b9*b9b11°b11b12°<br>b12*b12b13b14y4y6y7y8y<br>9y10y11y12*y12y23                         | 2379.23 | 64.353  | 113785 | 3 | 793.75  | -3.39  |
| Q8ZP65 TPX_SALTY Probable thiol<br>peroxidase   | 2  | Carbamidomethyl+C(13) | VLNIFPSIDTGVCASVR                       | 48  | 18 | 12 | 54.37  | b2b3b5b18y2y3y6y11y13°<br>y13y14y18                                                           | 1919.01 | 85.136  | 79529  | 2 | 960.01  | 4.77   |
| Q8ZP65 TPX_SALTY Probable thiol<br>peroxidase   | 3  | Carbamidomethyl+C(2)  | FCGAEGLSNVITLSTLR                       | 93  | 17 | 15 | 131.59 | b2b3b4b7b10b11b13b16y4<br>y6y9y12y15°y15y17                                                   | 1837.95 | 85.857  | 54613  | 2 | 919.48  | 3.59   |
| Q8ZP65 TPX_SALTY Probable thiol<br>peroxidase   | 4  |                       | DLSDVLSQYAGK                            | 33  | 13 | 11 | 86.92  | b2b4°b4y1y3y4y6y9y11y12<br>y13                                                                | 1382.68 | 59.237  | 45338  | 2 | 691.84  | 0.71   |
| Q8ZP65 TPX_SALTY Probable thiol<br>peroxidase   | 5  |                       | NYGVEIVDGPLK                            | 116 | 12 | 11 | 75.35  | b2b3*b3b12y1y3y4y6y8y1<br>0y12                                                                | 1303.69 | 64.581  | 41459  | 2 | 652.35  | -0.94  |
| Q8ZP65 TPX_SALTY Probable thiol<br>peroxidase   | 6  |                       | DLSDVLSQYAGKR                           | 33  | 14 | 6  | 25.4   | b12°b12y1y7y8y14                                                                              | 1538.78 | 54.701  | 11928  | 2 | 769.89  | -2.06  |
| Q8ZP65 TPX_SALTY Probable thiol<br>peroxidase   | 7  |                       | AVIVLDENDNVIFSQLVDEITHEPD<br>YDAALNVLK  | 133 | 34 | 7  | 49.79  | b2b3b4y10y11y12y34                                                                            | 3811.97 | 118.141 | 10526  | 3 | 1271.33 | 12.17  |
| Q8ZP65 TPX_SALTY Probable thiol<br>peroxidase   | 8  | Carbamidomethyl+C(15) | FNQLATEVENTVLCVSADLPFA<br>QSR           | 67  | 26 | 6  | 28.14  | y8*y8y9°y9y13y19                                                                              | 2908.44 | 109.889 | 7737   | 3 | 970.15  | -5.37  |
| Q8ZP65 TPX_SALTY Probable thiol<br>peroxidase   | 9  |                       | AQAFTLVAK                               | 24  | 9  | 6  | 76.65  | b3y3y4y5y6y7                                                                                  | 948.54  | 52.964  | 5343   | 1 | 948.54  | -7.34  |
| Q8ZP65 TPX_SALTY Probable thiol<br>peroxidase   | 10 |                       | AVIVLDENDNVIFSQLVDEITHEPD<br>YDAALNVLKA | 133 | 35 | 30 | 279.46 | b3b4b5b6b7b9b10°b10*b1<br>0b11b12b13y3y4y5y6y7y8<br>y9y12°y12*y12y14y16y19y<br>20y22y24y30y31 | 3882.99 | 119.949 | 80095  | 3 | 1295.00 | 6.92   |
| Q8ZP65 TPX_SALTY Probable thiol<br>peroxidase   | 11 |                       | NNEFLKNYGVEIVDGPLK                      | 110 | 18 | 8  | 38.18  | b3b6b8°b8b12°b12*b12y4                                                                        | 2049.05 | 75.905  | 14262  | 3 | 683.69  | -5.72  |
| Q8ZP65 TPX_SALTY Probable thiol<br>peroxidase   | 12 | Phosphoryl STY(13)    | MSQTVHFQGNPVTVANVIPQAGS<br>K            | 0   | 24 | 8  | 53.05  | b3b5°b5b6_H3PO4<br>b6b7b12b19y12                                                              | 2590.21 | 97.609  | 13115  | 4 | 648.31  | -10.09 |
| Q8ZP65 TPX_SALTY Probable thiol<br>peroxidase   | 13 |                       | SDVLSQYAGKR                             | 35  | 12 | 1  | 7.38   | b10                                                                                           | 1310.66 | 54.723  | 2959   | 2 | 655.83  | -9.22  |
| Q7CPE5 ATPD_SALTY ATP synthase<br>subunit delta | 1  |                       | LNALPDVLEQFIHLR                         | 85  | 15 | 19 | 156.56 | b2*b2b3*b3b4*b4y1y2y3y<br>4y5y6y7y8y9y10y11y13y1<br>5                                         | 1777.97 | 105.658 | 63617  | 3 | 593.33  | -14.62 |
| Q7CPE5 ATPD_SALTY ATP synthase<br>subunit delta | 2  |                       | AAFDFAVEHQSVVER                         | 13  | 14 | 12 | 45.77  | b1b2b5b6y1y2y4y5*y5y7°y<br>7y14                                                               | 1605.74 | 57.017  | 41226  | 3 | 535.92  | -14.37 |

|                                                                          |    |                       |                             |     |    |    |        |                                                          |         |         |       |   |         |        |
|--------------------------------------------------------------------------|----|-----------------------|-----------------------------|-----|----|----|--------|----------------------------------------------------------|---------|---------|-------|---|---------|--------|
| Q7CPE5 ATPD_SALTY ATP synthase subunit delta                             | 3  |                       | AGDMVIDGSVR                 | 154 | 11 | 4  | 36.37  | b3b5y7y9                                                 | 1119.55 | 45.839  | 15709 | 2 | 560.28  | 1.85   |
| Q7CPE5 ATPD_SALTY ATP synthase subunit delta                             | 4  |                       | SEFVTVARPYAK                | 1   | 12 | 7  | 72.04  | b3b5°b5y4y6y8y10                                         | 1367.71 | 47.048  | 37871 | 3 | 456.57  | -18.03 |
| Q7CPE5 ATPD_SALTY ATP synthase subunit delta                             | 5  |                       | ISAAMEK                     | 124 | 7  | 4  | 38.33  | b6°b6y3y4                                                | 749.39  | 50.400  | 3774  | 2 | 375.20  | -1.63  |
| Q7CPE5 ATPD_SALTY ATP synthase subunit delta                             | 6  |                       | AASEATSEVEVTSATALSEEQLSK    | 100 | 24 | 8  | 33.88  | b12b15y6y8y11°y11y13°y13                                 | 2438.21 | 89.208  | 1728  | 3 | 813.41  | 13.72  |
| Q7CPE5 ATPD_SALTY ATP synthase subunit delta                             | 7  |                       | MSEFVTVARPYAKAAFDFAVEHQSVR  | 0   | 27 | 5  | 15.96  | b6b11y3°y3y8                                             | 3085.48 | 132.851 | 3303  | 3 | 1029.16 | -14.48 |
| Q7CPE5 ATPD_SALTY ATP synthase subunit delta                             | 8  |                       | AAFDFAVEHQSVRWQDMLAFAAEVTK  | 13  | 27 | 3  | 12.23  | b11b22y4                                                 | 3096.53 | 83.388  | 1797  | 3 | 1032.85 | 13.17  |
| Q7CPE5 ATPD_SALTY ATP synthase subunit delta                             | 9  |                       | ALPDVLEQFIHLR               | 87  | 13 | 0  | 3.77   |                                                          | 1550.86 | 105.642 | 1640  | 2 | 775.93  | -8.34  |
| P65889 PUR7_SALTY Phohoribosylaminoimidazole-succinocarboxamide synthase | 1  |                       | LAEAGIPTQMER                | 60  | 12 | 22 | 145.42 | b1b2b3°b3b4°b4b5°b5b6y3y5y6°y6y7*y7y8*y8y9y10°y10*y10y12 | 1315.66 | 49.802  | 57905 | 2 | 658.34  | -3.06  |
| P65889 PUR7_SALTY Phohoribosylaminoimidazole-succinocarboxamide synthase | 2  | Carbamidomethyl+C(7)  | LLSDTECLVK                  | 72  | 10 | 7  | 41.22  | b1b8°b8y3y7y8y10                                         | 1177.61 | 53.004  | 41045 | 2 | 589.31  | -2.49  |
| P65889 PUR7_SALTY Phohoribosylaminoimidazole-succinocarboxamide synthase | 3  |                       | TVYSTENPDLLVLEFR            | 13  | 16 | 11 | 81.06  | b4b13y2y3y4y10y11y12y13y16*y16                           | 1895.98 | 88.338  | 31299 | 2 | 948.50  | 4.64   |
| P65889 PUR7_SALTY Phohoribosylaminoimidazole-succinocarboxamide synthase | 4  |                       | LFDDAGLILVDFK               | 164 | 13 | 4  | 21.35  | b5b8y3°y3                                                | 1465.79 | 97.577  | 1894  | 2 | 733.40  | -3.25  |
| P65889 PUR7_SALTY Phohoribosylaminoimidazole-succinocarboxamide synthase | 5  |                       | QSLGGLIEAYEAVHR             | 215 | 16 | 8  | 87.18  | b13y3y4y5y6y7y11y13                                      | 1713.86 | 84.510  | 45710 | 3 | 571.96  | -16.03 |
| P65889 PUR7_SALTY Phohoribosylaminoimidazole-succinocarboxamide synthase | 6  | Carbamidomethyl+C(8)  | LEMVPVECVVR                 | 83  | 11 | 3  | 25.06  | b4b10y6                                                  | 1330.71 | 39.746  | 15125 | 3 | 444.24  | 14.40  |
| P65889 PUR7_SALTY Phohoribosylaminoimidazole-succinocarboxamide synthase | 7  |                       | IEQFDR                      | 39  | 6  | 1  | 13.9   | y3                                                       | 807.40  | 26.240  | 8980  | 2 | 404.20  | 1.97   |
| P65889 PUR7_SALTY Phohoribosylaminoimidazole-succinocarboxamide synthase | 8  |                       | ANDVLK                      | 157 | 6  | 2  | 13.9   | b4*b4                                                    | 659.37  | 31.165  | 4555  | 1 | 659.37  | 1.57   |
| P65889 PUR7_SALTY Phohoribosylaminoimidazole-succinocarboxamide synthase | 9  | Carbamidomethyl+C(19) | LAEAGIPTQMERLLSDTECLVK      | 60  | 22 | 3  | 13.9   | b3b11y12                                                 | 2474.29 | 92.088  | 44527 | 3 | 825.43  | 9.28   |
| P65889 PUR7_SALTY Phohoribosylaminoimidazole-succinocarboxamide synthase | 10 |                       | FRQSLGGLIEAYEAVHR           | 213 | 18 | 3  | 16.15  | b13y7y9                                                  | 2017.05 | 79.087  | 37139 | 3 | 673.02  | -7.75  |
| P65889 PUR7_SALTY Phohoribosylaminoimidazole-succinocarboxamide synthase | 11 | Carbamidomethyl+C(9)  | KLEMVPVECVVR                | 82  | 12 | 5  | 51.03  | b5y3y7y10y11                                             | 1458.78 | 61.694  | 32371 | 2 | 729.89  | 0.08   |
| P65889 PUR7_SALTY Phohoribosylaminoimidazole-succinocarboxamide synthase | 12 |                       | TVYSTENPDLLVLEFRNDTSAGD GAR | 13  | 26 | 8  | 47.39  | b5b6b12b15y3y11y13y23                                    | 2840.37 | 80.588  | 6906  | 3 | 947.46  | 1.81   |
| P65889 PUR7_SALTY Phohoribosylaminoimidazole-succinocarboxamide synthase | 13 |                       | GEVVLGDEFSPDGSRLWDK         | 184 | 19 | 8  | 55.49  | b4b7b8b10b11y8y11°y11                                    | 2106.03 | 75.933  | 3378  | 3 | 702.68  | 9.16   |
| P65889 PUR7_SALTY Phohoribosylaminoimidazole-succinocarboxamide synthase | 14 |                       | LEFGLYKGEVVLGDEFSPDGSR      | 177 | 22 | 3  | 13.9   | b14y6y13                                                 | 2414.16 | 94.650  | 2969  | 2 | 1207.59 | -10.21 |
| P65889 PUR7_SALTY Phohoribosylaminoimidazole-succinocarboxamide synthase | 15 | Phosphoryl STY(5)     | TVYSTENPDLLVLEFR            | 13  | 16 | 7  | 36.01  | b4b10b13*b13y3y12*y12                                    | 1975.91 | 73.757  | 1834  | 4 | 494.73  | -12.36 |

|                                                           |    |                       |                                   |     |    |    |        |                                            |         |         |        |   |         |        |
|-----------------------------------------------------------|----|-----------------------|-----------------------------------|-----|----|----|--------|--------------------------------------------|---------|---------|--------|---|---------|--------|
| Q7CPL4 RL16_SALTY 50S ribosomal protein L16               | 1  |                       | VLYEMDGVPEELAR                    | 100 | 14 | 17 | 147.94 | b1b6b7b8b10°b10y2y3y5y6y8°y8y9y10y11y12y14 | 1620.80 | 69.584  | 71780  | 2 | 810.90  | 1.81   |
| Q7CPL4 RL16_SALTY 50S ribosomal protein L16               | 2  |                       | GNVEYWVALIQPGK                    | 86  | 14 | 5  | 39.51  | b9b10°b10b11y13                            | 1573.83 | 84.414  | 5567   | 2 | 787.42  | -7.14  |
| Q7CPL4 RL16_SALTY 50S ribosomal protein L16               | 3  |                       | TTFVTK                            | 127 | 6  | 1  | 13.9   | b5                                         | 696.40  | 22.807  | 2504   | 1 | 696.40  | 9.29   |
| Q7CPL4 RL16_SALTY 50S ribosomal protein L16               | 4  |                       | GLAAGADVSGSFGLK                   | 18  | 16 | 5  | 28.6   | b5b7°b7b11y10                              | 1496.80 | 44.036  | 2254   | 3 | 499.61  | 18.76  |
| Q7CPL4 RL16_SALTY 50S ribosomal protein L16               | 5  |                       | GNVEYWVALIQPGKVLYEMDGVPEELAR      | 86  | 28 | 3  | 18.02  | b3b5b7                                     | 3175.62 | 136.200 | 2736   | 3 | 1059.21 | 2.84   |
| Q7CPL4 RL16_SALTY 50S ribosomal protein L16               | 6  | Phosphoryl STY(9)     | GLAAGADVSGSFGLK                   | 18  | 16 | 3  | 17.79  | b3y6y9                                     | 1576.74 | 43.307  | 7896   | 3 | 526.25  | 4.80   |
| P0A1W6 LIVK_SALTY Leucine-ecific-binding protein          | 1  |                       | QQYGEGLAR                         | 170 | 9  | 14 | 63.12  | b2°b2b3°b3b9y1y2y4y5°y5y6°y6y7y9           | 1021.50 | 32.512  | 116187 | 2 | 511.25  | -8.90  |
| P0A1W6 LIVK_SALTY Leucine-ecific-binding protein          | 2  |                       | QGNANIVFFDGITAGEKDFSALIA R        | 186 | 25 | 14 | 79.95  | b2°b2b6°b6b25y4y5y6y13y15y18y19y20y25      | 2654.36 | 104.252 | 58590  | 3 | 885.46  | 0.09   |
| P0A1W6 LIVK_SALTY Leucine-ecific-binding protein          | 3  |                       | TAGLDSQQGPTAAK                    | 139 | 14 | 14 | 126.63 | b3°b3b4y5y6y7°y7y8y9y10°y10y11y12y14       | 1303.64 | 28.663  | 52413  | 2 | 652.33  | -4.31  |
| P0A1W6 LIVK_SALTY Leucine-ecific-binding protein          | 4  |                       | TQFMGPEGVGNASLSNIAGGAEE GMLVTMPK  | 242 | 31 | 14 | 82.32  | b2°b2b3b4b7y2y3y4y5y8y11y12y13y31          | 3035.47 | 92.533  | 49958  | 3 | 1012.49 | 1.53   |
| P0A1W6 LIVK_SALTY Leucine-ecific-binding protein          | 5  |                       | SASHAPLDLVK                       | 316 | 11 | 7  | 56.89  | b4b5y1y3y7y10y11                           | 1137.62 | 47.012  | 40022  | 2 | 569.32  | -2.79  |
| P0A1W6 LIVK_SALTY Leucine-ecific-binding protein          | 6  |                       | VAIVGAMSGPVAQWGDMEFNGA R          | 27  | 23 | 8  | 49.76  | b3b14y4y5y6y9y15y23                        | 2363.14 | 87.291  | 37675  | 3 | 788.38  | 4.65   |
| P0A1W6 LIVK_SALTY Leucine-ecific-binding protein          | 7  |                       | LQKENIDFVYYGGYYPEMGMLR            | 211 | 23 | 10 | 63.39  | y1y5y6y8°y8y9°y9y11y12y23                  | 2814.34 | 84.606  | 34348  | 3 | 938.78  | 3.99   |
| P0A1W6 LIVK_SALTY Leucine-ecific-binding protein          | 8  | Carbamidomethyl+C(10) | LVGVEYDDACDPK                     | 66  | 13 | 7  | 33.32  | b2b11y2y3y8y9y13                           | 1480.66 | 46.885  | 31808  | 2 | 740.84  | 1.57   |
| P0A1W6 LIVK_SALTY Leucine-ecific-binding protein          | 9  |                       | IAIIHDK                           | 163 | 7  | 6  | 41.34  | y2y3°y3y5y6y7                              | 809.48  | 32.088  | 27832  | 2 | 405.24  | -11.46 |
| P0A1W6 LIVK_SALTY Leucine-ecific-binding protein          | 10 |                       | DPSGPYVWITYAAVQSLATAMTR           | 293 | 23 | 5  | 20.86  | b8°b8b10b13y3                              | 2498.21 | 126.776 | 3278   | 3 | 833.41  | -12.41 |
| P0A1W6 LIVK_SALTY Leucine-ecific-binding protein          | 11 |                       | YILETVKPKQR                       | 153 | 10 | 9  | 69.52  | y3°y3y4y6°y6y7°y7y8°y8                     | 1246.69 | 44.861  | 44652  | 3 | 416.24  | -18.70 |
| P0A1W6 LIVK_SALTY Leucine-ecific-binding protein          | 12 |                       | GYQYIMR                           | 132 | 7  | 4  | 41.34  | y3y4y5°y5                                  | 930.45  | 46.948  | 28710  | 2 | 465.73  | -4.72  |
| P0A1W6 LIVK_SALTY Leucine-ecific-binding protein          | 13 |                       | ANGADTVIGPLK                      | 330 | 12 | 4  | 35.29  | b4b5b7y4                                   | 1155.63 | 51.761  | 6031   | 2 | 578.32  | -5.70  |
| P0A1W6 LIVK_SALTY Leucine-ecific-binding protein          | 14 |                       | GFEFGVFQWHADGSSTVAK               | 350 | 19 | 6  | 34.51  | b5b8b9°b9b12y6                             | 2070.00 | 78.133  | 1773   | 3 | 690.67  | 15.57  |
| P0A1W6 LIVK_SALTY Leucine-ecific-binding protein          | 15 |                       | GYQYIMRTAGLDSQGPPTAAK             | 132 | 21 | 6  | 22.49  | b3b9°b9b12°b12y11                          | 2215.06 | 85.508  | 4123   | 3 | 739.03  | -9.26  |
| P0A1W6 LIVK_SALTY Leucine-ecific-binding protein          | 16 |                       | SVQDGLKQGNANIVFFDGITAGE K         | 179 | 24 | 4  | 17.58  | b5b11y7y15                                 | 2508.24 | 107.701 | 3222   | 3 | 836.75  | -13.53 |
| P0A1W6 LIVK_SALTY Leucine-ecific-binding protein          | 17 |                       | GDCLKGFEFGVFQWHADGSSTVA K         | 346 | 23 | 4  | 19.89  | b7b12°b12b14                               | 2483.17 | 92.047  | 2877   | 2 | 1242.09 | -11.31 |
| P0A1W6 LIVK_SALTY Leucine-ecific-binding protein          | 18 | Oxidation+M(22)       | KDPSGPYVWITYAAVQSLATAMT R         | 292 | 24 | 3  | 13.11  | b12y3y6                                    | 2642.35 | 87.573  | 3799   | 3 | 881.46  | 8.50   |
| P0A1W6 LIVK_SALTY Leucine-ecific-binding protein          | 19 | Oxidation+M()         | TQFMGPEGVGNASLSNIAGGAEE GMLVTMPKR | 242 | 32 | 4  | 16.36  | b7b9b14y26                                 | 3207.54 | 114.093 | 2916   | 3 | 1069.85 | -5.40  |
| P0A1W6 LIVK_SALTY Leucine-ecific-binding protein          | 20 |                       | SHAPLDLVK                         | 318 | 9  | 0  | 2.26   |                                            | 979.54  | 47.023  | 4062   | 2 | 490.28  | -13.52 |
| P0A251 AHPC_SALTY Alkyl hydroperoxide reductase subunit C | 1  |                       | YAMIGDPTGALTR                     | 93  | 13 | 8  | 42.66  | b2b3b11y7y8y10°y10y13                      | 1365.68 | 62.750  | 105499 | 2 | 683.34  | -0.63  |
| P0A251 AHPC_SALTY Alkyl hydroperoxide reductase subunit C | 2  |                       | NFDNMREDEGLADR                    | 106 | 14 | 8  | 57.75  | b2b8b9y3y5y6y12y14                         | 1681.70 | 46.689  | 64232  | 3 | 561.24  | -13.28 |

|                                                           |    |                       |                                 |     |    |    |        |                                                             |         |         |       |   |         |        |
|-----------------------------------------------------------|----|-----------------------|---------------------------------|-----|----|----|--------|-------------------------------------------------------------|---------|---------|-------|---|---------|--------|
| P0A251 AHPC_SALTY Alkyl hydroperoxide reductase subunit C | 3  |                       | ATFVVDPQGIIQAEIVTAEGIGR         | 120 | 23 | 25 | 197.34 | b2°b2b3°b3b4°b4b5b6b8b9y1y2y3y4y5°y5y6y7y8y9y10y11y12y17y23 | 2384.26 | 128.413 | 51644 | 3 | 795.43  | -7.37  |
| P0A251 AHPC_SALTY Alkyl hydroperoxide reductase subunit C | 4  |                       | LGVDVYSVSTDTHFTHK               | 63  | 17 | 13 | 108.64 | b3b4b7b9°b9b12y3°y3y6y8y9y11y15                             | 1905.92 | 57.033  | 42056 | 3 | 635.98  | -5.70  |
| P0A251 AHPC_SALTY Alkyl hydroperoxide reductase subunit C | 5  | Carbamidomethyl+C(15) | WSVFFFPADFTFVCPTELGDVA DHYEELQK | 32  | 31 | 13 | 90.72  | b3b4°b4b6b7b9b10y3y8y9y24y25y31                             | 3757.77 | 119.198 | 22005 | 3 | 1253.26 | 12.41  |
| P0A251 AHPC_SALTY Alkyl hydroperoxide reductase subunit C | 6  |                       | NGEFIEVTEKDTEGR                 | 17  | 15 | 7  | 30.4   | b1b2b9y3y4y9°y9                                             | 1723.81 | 49.614  | 5574  | 2 | 862.41  | -1.70  |
| P0A251 AHPC_SALTY Alkyl hydroperoxide reductase subunit C | 7  |                       | ATFVVDPQGIIQAEIVTAEGIGRDA SDLLR | 120 | 30 | 5  | 11.62  | b2b6y9°y9y16                                                | 3154.67 | 137.188 | 2122  | 3 | 1052.23 | -1.39  |
| P0A251 AHPC_SALTY Alkyl hydroperoxide reductase subunit C | 8  |                       | AWHSSSETIAK                     | 80  | 11 | 8  | 83.94  | b3b9y3y4y5y8°y8y9                                           | 1216.57 | 29.105  | 59148 | 3 | 406.20  | -19.87 |
| P0A251 AHPC_SALTY Alkyl hydroperoxide reductase subunit C | 9  |                       | NGEFIEVTEK                      | 17  | 10 | 4  | 27.7   | b4b7°b7y7                                                   | 1165.56 | 88.565  | 2718  | 2 | 583.28  | -11.31 |
| P0A251 AHPC_SALTY Alkyl hydroperoxide reductase subunit C | 10 |                       | EGEATLAPSLDLVGKI                | 171 | 16 | 4  | 29.27  | b3b4b7y4                                                    | 1612.88 | 84.896  | 23665 | 2 | 806.94  | -0.61  |
| P0A251 AHPC_SALTY Alkyl hydroperoxide reductase subunit C | 11 |                       | IKYAMIGDPTGALTR                 | 91  | 15 | 4  | 30.4   | b13y3y5y6                                                   | 1606.84 | 62.318  | 19902 | 3 | 536.29  | -12.23 |
| P0A251 AHPC_SALTY Alkyl hydroperoxide reductase subunit C | 12 |                       | NQAFKNGEFIEVTEK                 | 12  | 15 | 3  | 26.87  | y8y9y14                                                     | 1753.89 | 82.747  | 7599  | 2 | 877.45  | 7.80   |
| P0A251 AHPC_SALTY Alkyl hydroperoxide reductase subunit C | 13 |                       | NGEFIEVTEKDTEGR                 | 17  | 15 | 3  | 18.79  | b10y7y10                                                    | 1723.81 | 93.986  | 3187  | 3 | 575.28  | -0.57  |
| P0A251 AHPC_SALTY Alkyl hydroperoxide reductase subunit C | 14 |                       | STDTHFTHK                       | 71  | 9  | 0  | 4.53   |                                                             | 1073.51 | 57.046  | 14062 | 2 | 537.26  | 11.71  |
| P0A251 AHPC_SALTY Alkyl hydroperoxide reductase subunit C | 15 |                       | SVSTDTHFTHK                     | 69  | 11 | 2  | 7.26   | b8°b8                                                       | 1259.61 | 57.045  | 7622  | 2 | 630.31  | 7.37   |
| P0A251 AHPC_SALTY Alkyl hydroperoxide reductase subunit C | 16 |                       | LGVDVYSVSTDTHFTHK               | 63  | 17 | 1  | 7.26   | y10                                                         | 1887.91 | 57.077  | 6719  | 4 | 472.73  | -6.72  |
| P66932 TIG_SALTY Trigger factor                           | 1  |                       | NVALEEQAWEAVLAK                 | 399 | 15 | 17 | 155.82 | b2b3b4b5b6b7°b7b9b14°b14y3y4y10y11y12y13y15                 | 1583.87 | 79.957  | 68493 | 2 | 792.44  | 0.77   |
| P66932 TIG_SALTY Trigger factor                           | 2  |                       | ANDIDVPSALIDSEIDVLR             | 296 | 20 | 7  | 23.44  | b2°b2b3°b3y4y14y16                                          | 2211.15 | 90.360  | 41554 | 3 | 737.72  | -5.52  |
| P66932 TIG_SALTY Trigger factor                           | 3  |                       | FGVEDGSVAGLR                    | 255 | 12 | 12 | 76.54  | b2b3b4°b4b11y1y2y3y4y7y8y12                                 | 1206.61 | 56.991  | 41541 | 2 | 603.81  | -0.40  |
| P66932 TIG_SALTY Trigger factor                           | 4  |                       | INPAGAPNYVPGEYK                 | 83  | 15 | 6  | 26.87  | b2y2y5y9y13y15                                              | 1589.79 | 50.754  | 33679 | 2 | 795.40  | -0.69  |
| P66932 TIG_SALTY Trigger factor                           | 5  |                       | SQAIEGLVK                       | 287 | 9  | 9  | 58.63  | b2°b2y1y4y5y7y8°y8y9                                        | 944.53  | 46.980  | 28559 | 2 | 472.77  | -12.08 |
| P66932 TIG_SALTY Trigger factor                           | 6  |                       | GLIEEMASAYEDPKEVIEFYK           | 368 | 22 | 5  | 26.68  | b3b6y5y7y13                                                 | 2548.22 | 97.378  | 26662 | 3 | 850.08  | 0.77   |
| P66932 TIG_SALTY Trigger factor                           | 7  |                       | VEERELPELTEEFIK                 | 239 | 15 | 6  | 42.44  | b2b4b6b8°b8b12                                              | 1860.94 | 95.790  | 24402 | 2 | 930.97  | -11.61 |
| P66932 TIG_SALTY Trigger factor                           | 8  |                       | ANDIDVPSALIDSEIDVLR             | 296 | 19 | 5  | 24.5   | b14y3y13y15y19                                              | 2055.07 | 94.419  | 22337 | 2 | 1028.04 | 2.73   |
| P66932 TIG_SALTY Trigger factor                           | 9  |                       | MIPGFEDGVK                      | 193 | 10 | 5  | 14.96  | b2b8y3y8°y10                                                | 1092.54 | 58.000  | 16976 | 2 | 546.77  | -2.23  |
| P66932 TIG_SALTY Trigger factor                           | 10 |                       | VPMNIVAQR                       | 48  | 9  | 3  | 46.86  | y4y6y8                                                      | 1027.56 | 46.838  | 15962 | 2 | 514.29  | -7.13  |
| P66932 TIG_SALTY Trigger factor                           | 11 |                       | NKELMDNMR                       | 390 | 9  | 5  | 55.62  | y3y4y5y7y9                                                  | 1150.53 | 34.629  | 9755  | 2 | 575.77  | -3.08  |
| P66932 TIG_SALTY Trigger factor                           | 12 |                       | MQVSVETTQGLGR                   | 0   | 13 | 3  | 21.35  | b7y3y9                                                      | 1405.72 | 58.369  | 5929  | 2 | 703.36  | 3.99   |
| P66932 TIG_SALTY Trigger factor                           | 13 |                       | ATSFNELMNQQA                    | 420 | 12 | 4  | 23.01  | b1b3b5y11                                                   | 1353.59 | 49.806  | 5546  | 3 | 451.87  | -13.89 |
| P66932 TIG_SALTY Trigger factor                           | 14 |                       | SELVNVAKK                       | 29  | 9  | 5  | 31.3   | b2b4b5°b5y7                                                 | 987.57  | 29.997  | 3835  | 2 | 494.29  | -10.14 |

|                                                |    |                      |                                     |     |    |    |        |                                                                                           |         |         |       |   |         |        |
|------------------------------------------------|----|----------------------|-------------------------------------|-----|----|----|--------|-------------------------------------------------------------------------------------------|---------|---------|-------|---|---------|--------|
| P66932 TIG_SALTY Trigger factor                | 15 |                      | AGEEFTIDVTFPEEYHAENLK               | 206 | 21 | 3  | 24.02  | b10b12b13                                                                                 | 2439.11 | 71.740  | 2908  | 4 | 610.53  | -11.61 |
| P66932 TIG_SALTY Trigger factor                | 16 |                      | QDVLGDLMSR                          | 63  | 10 | 6  | 59.52  | b3b5b6*b6b7y9                                                                             | 1133.57 | 49.827  | 2573  | 2 | 567.29  | 6.78   |
| P66932 TIG_SALTY Trigger factor                | 17 |                      | ATDFVLAMGQGR                        | 181 | 12 | 3  | 36.23  | y4y5y6                                                                                    | 1265.63 | 65.633  | 21073 | 2 | 633.32  | -1.45  |
| P66932 TIG_SALTY Trigger factor                | 18 |                      | SELVNVAK                            | 29  | 8  | 3  | 41.71  | y4y5y6                                                                                    | 859.47  | 37.057  | 19608 | 2 | 430.24  | -17.61 |
| P66932 TIG_SALTY Trigger factor                | 19 |                      | NFVDIAIK                            | 73  | 8  | 3  | 33.93  | b4y3y4                                                                                    | 919.52  | 53.287  | 15036 | 2 | 460.27  | -1.19  |
| P66932 TIG_SALTY Trigger factor                | 20 |                      | VTIDFTGSVDGEEFEGGK                  | 163 | 18 | 5  | 32.17  | b11b13y4y6y11                                                                             | 1886.83 | 121.175 | 5478  | 3 | 629.61  | -18.83 |
| P66932 TIG_SALTY Trigger factor                | 21 |                      | YGASVR                              | 57  | 6  | 1  | 13.9   | b3                                                                                        | 652.33  | 26.717  | 5008  | 1 | 652.33  | -11.32 |
| P66932 TIG_SALTY Trigger factor                | 22 |                      | VTITIAADSIETAVK                     | 14  | 15 | 6  | 67.15  | b8b9b10b11b12y9                                                                           | 1531.82 | 76.016  | 3666  | 2 | 766.42  | -21.83 |
| P66932 TIG_SALTY Trigger factor                | 23 |                      | QAAQRFGGNEK                         | 316 | 11 | 4  | 37.8   | b3b4b8y8                                                                                  | 1205.59 | 48.138  | 97047 | 2 | 603.30  | -14.07 |
| P66932 TIG_SALTY Trigger factor                | 24 |                      | MQVSVETQGLGRR                       | 0   | 14 | 6  | 42.73  | b3b4°b4b5°b5b13                                                                           | 1561.82 | 88.130  | 38497 | 2 | 781.41  | 2.97   |
| P66932 TIG_SALTY Trigger factor                | 25 |                      | ANDIDVPSALIDSEIDLRR                 | 296 | 20 | 3  | 21.68  | b5b7b13                                                                                   | 2211.14 | 90.258  | 17502 | 2 | 1106.08 | -7.73  |
| P66932 TIG_SALTY Trigger factor                | 26 |                      | GKVPMNIVAGR                         | 46  | 11 | 9  | 94.92  | b3b5b6*b6b7y4y6y7y8                                                                       | 1212.68 | 43.355  | 9548  | 2 | 606.84  | -10.27 |
| P66932 TIG_SALTY Trigger factor                | 27 |                      | AGEEFTIDVTFPEEYHAENLK GK            | 206 | 23 | 4  | 22.51  | b10b11°b11y20                                                                             | 2624.23 | 73.709  | 7379  | 4 | 656.81  | -9.68  |
| P66932 TIG_SALTY Trigger factor                | 28 |                      | GLIEEMASAYEDPKEVIEFYSK              | 368 | 22 | 3  | 13.9   | b7y4y12                                                                                   | 2548.23 | 82.515  | 5424  | 4 | 637.81  | 4.98   |
| P66932 TIG_SALTY Trigger factor                | 29 |                      | QDVLGDLMSRNFVDIAIK                  | 63  | 18 | 5  | 22.62  | b8°b8b10y3y10                                                                             | 2034.08 | 100.752 | 2308  | 3 | 678.70  | 7.56   |
| P66932 TIG_SALTY Trigger factor                | 30 |                      | VEERELPEL TEEFIK                    | 239 | 15 | 3  | 18.79  | b3b12y13                                                                                  | 1860.95 | 97.139  | 1794  | 2 | 930.98  | -4.26  |
| P66932 TIG_SALTY Trigger factor                | 31 | Phosphoryl STY(10)   | GLIEEMASAYEDPKEVIEFYSK              | 368 | 22 | 3  | 13.9   | b8y7y12                                                                                   | 2628.19 | 86.585  | 2678  | 2 | 1314.60 | 5.02   |
| P66932 TIG_SALTY Trigger factor                | 32 | Oxidation+M(8)       | ATDFVLAMGQGR                        | 181 | 12 | 3  | 23.01  | b3b9y5                                                                                    | 1281.64 | 63.369  | 24553 | 2 | 641.33  | 14.48  |
| P66692 RPIA_SALTY Ribose-5-phohate isomerase A | 1  |                      | AVGWAALQYVQPGTIVGVGTGSTAAHFIDALGTMK | 8   | 35 | 32 | 247.65 | b2b3b4b5b6b9b10*b10b11b17y2y3y4y5y6y11°y11y12°y12y14y15y17y19y20y24y26y27y28*y28y29y30y35 | 3487.81 | 107.343 | 74796 | 3 | 1163.28 | 2.80   |
| P66692 RPIA_SALTY Ribose-5-phohate isomerase A | 2  | Carbamidomethyl+C(3) | FICIADASK                           | 112 | 9  | 8  | 69.14  | b2y3y4°y4y5y6y7y9                                                                         | 1024.51 | 50.826  | 31257 | 2 | 512.76  | -6.31  |
| P66692 RPIA_SALTY Ribose-5-phohate isomerase A | 3  |                      | GADVALIGTPDGVK                      | 201 | 14 | 9  | 31.73  | b5°b5y1y2y5°y5y7y8y14                                                                     | 1312.71 | 57.171  | 24626 | 2 | 656.86  | -1.49  |
| P66692 RPIA_SALTY Ribose-5-phohate isomerase A | 4  |                      | GLGIHVFDLNEVDSLGIYVDGADEINGHMQMIK   | 61  | 33 | 4  | 36.99  | y7y8y9*y9                                                                                 | 3599.74 | 107.749 | 10947 | 5 | 720.75  | -3.59  |
| P66692 RPIA_SALTY Ribose-5-phohate isomerase A | 5  |                      | GQIEGAVSSSDASTEK                    | 43  | 16 | 11 | 51.57  | b2*b2b6°b6*b6b8*b8b11b12b13y16                                                            | 1565.74 | 50.878  | 10691 | 2 | 783.38  | 9.12   |
| P66692 RPIA_SALTY Ribose-5-phohate isomerase A | 6  |                      | GQIEGAVSSSDASTEKLK                  | 43  | 18 | 6  | 25.07  | b3b4°b4b7°b7*b7                                                                           | 1806.90 | 38.775  | 3083  | 2 | 903.95  | -3.18  |
| P66692 RPIA_SALTY Ribose-5-phohate isomerase A | 7  | Phosphoryl STY(14)   | GLGIHVFDLNEVDSLGIYVDGADEINGHMQMIK   | 61  | 33 | 6  | 22.36  | b12°b12b13°b13y14_H3PO4 y14°y14                                                           | 3679.68 | 84.316  | 2105  | 4 | 920.67  | -8.82  |
| P66692 RPIA_SALTY Ribose-5-phohate isomerase A | 8  | Oxidation+M(31)      | GLGIHVFDLNEVDSLGIYVDGADEINGHMQMIK   | 61  | 33 | 5  | 16.05  | b13°b13y3y7y24                                                                            | 3615.77 | 86.780  | 2821  | 3 | 1205.93 | 7.22   |
| P66692 RPIA_SALTY Ribose-5-phohate isomerase A | 9  |                      | GQIEGAVSSSDAST                      | 43  | 14 | 1  | 7.26   | y4                                                                                        | 1308.61 | 50.925  | 2968  | 2 | 654.81  | 13.71  |
| P66692 RPIA_SALTY Ribose-5-phohate isomerase A | 10 |                      | SLGIYVDGADEINGHMQMIK                | 74  | 20 | 2  | 9.62   | b3°b3                                                                                     | 2191.08 | 107.747 | 1853  | 3 | 731.03  | 14.15  |

|                                             |    |                                        |                                     |     |    |    |        |                                                               |         |         |       |   |         |        |
|---------------------------------------------|----|----------------------------------------|-------------------------------------|-----|----|----|--------|---------------------------------------------------------------|---------|---------|-------|---|---------|--------|
| P0A7K0 RL11_SALTY 50S ribosomal protein L11 | 1  |                                        | AQLQEIAQTK                          | 103 | 10 | 12 | 76.06  | b2*b2b3y2y3y5y6y7°y7y8y10                                     | 1129.61 | 38.722  | 75625 | 2 | 565.31  | -11.24 |
| P0A7K0 RL11_SALTY 50S ribosomal protein L11 | 2  |                                        | AADMTGADIEAMTR                      | 113 | 14 | 10 | 112.59 | b3y3y4y5y6y7y8y9y12y14                                        | 1452.65 | 57.111  | 59094 | 2 | 726.83  | 3.78   |
| P0A7K0 RL11_SALTY 50S ribosomal protein L11 | 3  |                                        | GLPIPVVITVYADR                      | 51  | 14 | 7  | 46.56  | b3b4y2y8y10y12y14                                             | 1512.88 | 91.130  | 57464 | 2 | 756.94  | 0.56   |
| P0A7K0 RL11_SALTY 50S ribosomal protein L11 | 4  |                                        | TPPAAVLLK                           | 72  | 9  | 6  | 58.63  | b2y3y5y7y8y9                                                  | 909.57  | 54.035  | 50066 | 2 | 455.29  | -11.41 |
| P0A7K0 RL11_SALTY 50S ribosomal protein L11 | 5  | Carbamidomethyl+C(29)                  | LQVAAGMANPSPVGPALGQQG VNIMEFCK      | 10  | 30 | 4  | 11.62  | b12y9°y9y16                                                   | 3081.59 | 110.248 | 11995 | 4 | 771.15  | 18.94  |
| P0A7K0 RL11_SALTY 50S ribosomal protein L11 | 6  | Carbamidomethyl+C(29)                  | LQVAAGMANPSPVGPALGQQG VNIMEFCKAFNAK | 10  | 35 | 3  | 22.5   | b10y7y8                                                       | 3612.79 | 130.757 | 35370 | 4 | 903.95  | -7.03  |
| P0A7K0 RL11_SALTY 50S ribosomal protein L11 | 7  |                                        | SIEGTARSMGLVVED                     | 127 | 15 | 3  | 18.79  | b8y9y14                                                       | 1563.78 | 55.693  | 2290  | 2 | 782.40  | 9.37   |
| P0A7K0 RL11_SALTY 50S ribosomal protein L11 | 8  | Carbamidomethyl+C(29) ;Oxidation+M(26) | LQVAAGMANPSPVGPALGQQG VNIMEFCK      | 10  | 30 | 4  | 22.23  | b7y8y9°y9                                                     | 3097.57 | 126.648 | 2551  | 3 | 1033.19 | 12.45  |
| P0A1P6 GLNA_SALTY Glutamine synthetase      | 1  | Carbamidomethyl+C(1)                   | CDILEPGTLQGYDRDPR                   | 89  | 17 | 12 | 70.74  | b2b3b9b11b15y1y2y6y9*y9y11y13                                 | 2004.94 | 59.748  | 43894 | 3 | 668.98  | -3.17  |
| P0A1P6 GLNA_SALTY Glutamine synthetase      | 2  |                                        | LVPGYEAPVMLAYSAR                    | 322 | 16 | 8  | 68.88  | b14y4y5y9y11y13y14y16                                         | 1736.91 | 77.391  | 39212 | 2 | 868.96  | 5.06   |
| P0A1P6 GLNA_SALTY Glutamine synthetase      | 3  |                                        | ATGIADTVLFGPEPEFFLFDDIR             | 117 | 23 | 24 | 132.3  | b2°b2b3°b3b4b6b8°b8b9b10°b10b13b18y1y2y3y4y5°y5y8y10y11y13y23 | 2570.27 | 117.004 | 28324 | 3 | 857.43  | -4.46  |
| P0A1P6 GLNA_SALTY Glutamine synthetase      | 4  |                                        | EIPQVAGSLEEALNALDLDR                | 406 | 20 | 18 | 82.98  | b4°b4b8°b8b11°b11°b11b14y1y6°y6y7°y7y10y11y13y19y20           | 2153.09 | 95.678  | 27328 | 3 | 718.37  | -10.77 |
| P0A1P6 GLNA_SALTY Glutamine synthetase      | 5  |                                        | AINALANPTTNSYKR                     | 307 | 15 | 12 | 59.16  | b2b3b4°b4y8*y8y9°y9y10°y10y13y15                              | 1633.85 | 42.420  | 26853 | 3 | 545.29  | -12.10 |
| P0A1P6 GLNA_SALTY Glutamine synthetase      | 6  |                                        | GGYFVPPVDSAQDIR                     | 177 | 16 | 8  | 17.79  | b5y1y2y8°y8*y8y14*y14                                         | 1717.87 | 56.990  | 24709 | 3 | 573.30  | 11.16  |
| P0A1P6 GLNA_SALTY Glutamine synthetase      | 7  |                                        | GINESDMVLPMDASTAVIDPFFAD STLIR      | 59  | 30 | 16 | 112.75 | b3b9b10°b10b16y2y3y4y6y8y9y11y12y13y20y21                     | 3238.61 | 113.318 | 17953 | 3 | 1080.21 | 3.17   |
| P0A1P6 GLNA_SALTY Glutamine synthetase      | 8  | Carbamidomethyl+C(1)                   | CDILEPGTLQGYDR                      | 89  | 14 | 7  | 49.73  | b10y5y8*y8y11y13y14                                           | 1636.79 | 71.658  | 17322 | 2 | 818.90  | 14.54  |
| P0A1P6 GLNA_SALTY Glutamine synthetase      | 9  | Carbamidomethyl+C(11)                  | FPDPAANPYLCFAALLMAGLDGIK            | 360 | 24 | 9  | 45.26  | b3b14b15°b15y3y6y7y11y24                                      | 2565.30 | 136.628 | 14110 | 3 | 855.77  | 3.24   |
| P0A1P6 GLNA_SALTY Glutamine synthetase      | 10 |                                        | FGASISGSHVAIDDIEGAWNSSTK            | 140 | 24 | 8  | 50.18  | b6b9b11b14y6y9y12y15                                          | 2449.17 | 75.902  | 13210 | 3 | 817.06  | 4.29   |
| P0A1P6 GLNA_SALTY Glutamine synthetase      | 11 |                                        | YVVHNVahr                           | 240 | 9  | 5  | 55.62  | b2y3y4y5y7                                                    | 1094.58 | 21.974  | 12381 | 2 | 547.80  | -1.45  |
| P0A1P6 GLNA_SALTY Glutamine synthetase      | 12 |                                        | NGTNLFSGDK                          | 277 | 10 | 5  | 27.7   | b3b9y2y8y10                                                   | 1052.52 | 48.426  | 7267  | 2 | 526.76  | 14.27  |
| P0A1P6 GLNA_SALTY Glutamine synthetase      | 13 |                                        | SAEHLVTMLNEHEVK                     | 1   | 15 | 4  | 18.79  | b5°b5y6y9                                                     | 1736.84 | 54.493  | 41244 | 3 | 579.62  | -15.67 |
| P0A1P6 GLNA_SALTY Glutamine synthetase      | 14 |                                        | NLYDLPPEEAK                         | 395 | 11 | 3  | 28.07  | b6y3y4                                                        | 1288.64 | 43.995  | 19416 | 3 | 430.22  | 1.89   |
| P0A1P6 GLNA_SALTY Glutamine synthetase      | 15 |                                        | ADEIQIYK                            | 232 | 8  | 4  | 33.93  | b5°b5b6y6                                                     | 979.50  | 48.111  | 8811  | 2 | 490.26  | -5.86  |
| P0A1P6 GLNA_SALTY Glutamine synthetase      | 16 |                                        | MTPHPVEFELYYSV                      | 455 | 14 | 4  | 39.44  | b6b7y4y5                                                      | 1711.84 | 85.658  | 4831  | 2 | 856.42  | 21.46  |
| P0A1P6 GLNA_SALTY Glutamine synthetase      | 17 |                                        | EQHVTIPAHQVNAEFFEEGK                | 28  | 20 | 10 | 51.47  | b5b7°b7b9°b9b11°b11y6y7y9                                     | 2310.13 | 112.732 | 4696  | 3 | 770.71  | 5.81   |
| P0A1P6 GLNA_SALTY Glutamine synthetase      | 18 |                                        | AGGVFTDEAIDAYIALR                   | 430 | 17 | 6  | 30.82  | b10°b10b13y11°y11y12                                          | 1781.87 | 99.452  | 3374  | 2 | 891.44  | -20.21 |
| P0A1P6 GLNA_SALTY Glutamine synthetase      | 19 |                                        | AINALANPTTNSYK                      | 307 | 14 | 4  | 28.56  | b10b12y4y9                                                    | 1477.73 | 78.142  | 2995  | 3 | 493.25  | -21.56 |

|                                                                         |    |                                     |                                         |     |    |    |       |                                  |         |         |        |   |         |        |
|-------------------------------------------------------------------------|----|-------------------------------------|-----------------------------------------|-----|----|----|-------|----------------------------------|---------|---------|--------|---|---------|--------|
| P0A1P6 GLNA_SALTY Glutamine synthetase                                  | 20 |                                     | YAGLSEQALYYIGGVK                        | 287 | 17 | 3  | 23.9  | b5b6y4                           | 1844.96 | 33.972  | 2453   | 3 | 615.66  | -11.05 |
| P0A1P6 GLNA_SALTY Glutamine synthetase                                  | 21 |                                     | MSAEHVLTMLNEHEVK                        | 0   | 16 | 3  | 17.79 | b3b8y11                          | 1867.89 | 91.673  | 2006   | 2 | 934.45  | -5.16  |
| P0A1P6 GLNA_SALTY Glutamine synthetase                                  | 22 |                                     | NGTNLFSGDKYAGLSEQALYYIGGVK              | 277 | 27 | 3  | 12.23 | b5b19y5                          | 2878.47 | 99.039  | 30390  | 3 | 960.16  | 1.87   |
| P0A1P6 GLNA_SALTY Glutamine synthetase                                  | 23 |                                     | LVPGYEAPVMLAYSARNR                      | 322 | 18 | 3  | 16.15 | b8b13y5                          | 2007.07 | 100.894 | 13654  | 2 | 1004.04 | 10.46  |
| P0A1P6 GLNA_SALTY Glutamine synthetase                                  | 24 | Carbamidomethyl+C(1)                | CDILEPGTLQGYDRDPR                       | 89  | 17 | 4  | 28.3  | b3y5y6y8                         | 2004.96 | 32.434  | 11134  | 3 | 668.99  | 6.33   |
| P0A1P6 GLNA_SALTY Glutamine synthetase                                  | 25 |                                     | FGASISGSHVAID DIEGAWNSSTK YEGGNK        | 140 | 30 | 5  | 11.62 | b7y10°y10y13*y13                 | 3097.48 | 75.930  | 9349   | 4 | 775.13  | 11.11  |
| P0A1P6 GLNA_SALTY Glutamine synthetase                                  | 26 |                                     | AEDYLRATGIADTVLFGPEPEFFLFD DIR          | 111 | 29 | 6  | 22.71 | b6b7°b7b13°b13y9                 | 3317.62 | 97.133  | 7704   | 4 | 830.16  | -4.42  |
| P0A1P6 GLNA_SALTY Glutamine synthetase                                  | 27 |                                     | NKIHPGEAMDK                             | 384 | 11 | 3  | 28.07 | b8b9y9                           | 1239.62 | 68.307  | 2668   | 2 | 620.32  | 7.19   |
| P0A1P6 GLNA_SALTY Glutamine synthetase                                  | 28 |                                     | VRMTPHPVEFELYYSV                        | 453 | 16 | 3  | 17.79 | b5y3y6                           | 1966.99 | 59.188  | 1746   | 4 | 492.50  | 6.21   |
| P0A1P6 GLNA_SALTY Glutamine synthetase                                  | 29 | Carbamidomethyl+C(4); Oxidation+M() | SEMCLVMEQMGLVVEAHHHEVA TAGQNEVATR       | 193 | 32 | 6  | 11.33 | b6y11°y11y13°y13*y13             | 3579.68 | 117.064 | 23862  | 3 | 1193.90 | 10.37  |
| P0A1P6 GLNA_SALTY Glutamine synthetase                                  | 30 | Oxidation+M(4)                      | FNTMTKK                                 | 225 | 7  | 3  | 41.34 | b3b6y6                           | 885.44  | 57.668  | 2255   | 2 | 443.22  | -14.06 |
| P0A1P6 GLNA_SALTY Glutamine synthetase                                  | 31 |                                     | ID DIEGAWNSSTK                          | 151 | 13 | 0  | 7.17  |                                  | 1435.65 | 75.907  | 5691   | 2 | 718.33  | -11.22 |
| P0A1P6 GLNA_SALTY Glutamine synthetase                                  | 32 |                                     | NALANPTTNSYKR                           | 309 | 13 | 0  | 3.77  |                                  | 1449.75 | 42.429  | 3663   | 2 | 725.38  | 0.93   |
| P02911 ARGT_SALTY Lysine-arginine-ornithine-binding periplasmic protein | 1  |                                     | GVDVVAYANQDLIYSDLTAGR                   | 155 | 21 | 7  | 27.85 | b6b13y7°y7y13y16y21              | 2240.12 | 72.343  | 100538 | 3 | 747.38  | 0.76   |
| P02911 ARGT_SALTY Lysine-arginine-ornithine-binding periplasmic protein | 2  | Carbamidomethyl+C(1)                | CTWVASDFDALIPSLK                        | 66  | 16 | 9  | 62.78 | b3°b3b4b5b12y3y4y13y16           | 1822.92 | 97.920  | 40706  | 2 | 911.96  | 7.10   |
| P02911 ARGT_SALTY Lysine-arginine-ornithine-binding periplasmic protein | 3  |                                     | HVGVLQGSTQEAYANDNWR                     | 134 | 19 | 14 | 95.03 | b2b3b4b10b13y2y3*y3y5y6y7y8y9y19 | 2144.99 | 53.171  | 40527  | 3 | 715.67  | -8.65  |
| P02911 ARGT_SALTY Lysine-arginine-ornithine-binding periplasmic protein | 4  |                                     | IGTDTTYAPFSSK                           | 29  | 13 | 8  | 59.86 | b1y5y8y9y10y11°y11y13            | 1387.67 | 52.993  | 39041  | 2 | 694.34  | -0.79  |
| P02911 ARGT_SALTY Lysine-arginine-ornithine-binding periplasmic protein | 5  |                                     | YFGDGTGVGLR                             | 211 | 11 | 4  | 32.05 | y7y9y10y11                       | 1141.56 | 55.597  | 36573  | 2 | 571.28  | -3.10  |
| P02911 ARGT_SALTY Lysine-arginine-ornithine-binding periplasmic protein | 6  |                                     | GSPIQPTLESLK                            | 120 | 12 | 3  | 23.01 | b11y6y10                         | 1269.72 | 55.103  | 93056  | 3 | 423.91  | 13.65  |
| P02911 ARGT_SALTY Lysine-arginine-ornithine-binding periplasmic protein | 7  | Carbamidomethyl+C(15)               | GEFIGFDIDLGNEMCK                        | 45  | 16 | 4  | 31.73 | b3b4y3y14                        | 1844.85 | 78.894  | 38008  | 3 | 615.62  | 17.87  |
| P02911 ARGT_SALTY Lysine-arginine-ornithine-binding periplasmic protein | 8  |                                     | QQEIAFS DK                              | 99  | 9  | 6  | 31.3  | b3°b3y4°y4y5°y5                  | 1065.53 | 38.790  | 3152   | 2 | 533.27  | 9.05   |
| P02911 ARGT_SALTY Lysine-arginine-ornithine-binding periplasmic protein | 9  |                                     | DDTELK                                  | 223 | 6  | 1  | 13.9  | y3                               | 720.34  | 61.467  | 2322   | 1 | 720.34  | 0.00   |
| P02911 ARGT_SALTY Lysine-arginine-ornithine-binding periplasmic protein | 10 |                                     | GVDVVAYANQDLIYSDLTAGRLD AALQDEVAASEGFLK | 155 | 38 | 6  | 24.55 | b13°b13b14y5y13*y13              | 3997.99 | 102.619 | 27724  | 4 | 1000.25 | -2.44  |
| P02911 ARGT_SALTY Lysine-arginine-ornithine-binding periplasmic protein | 11 |                                     | ALTEL RQDGTYDK                          | 234 | 13 | 4  | 26.12 | b8y9°y9y10                       | 1509.74 | 57.490  | 7581   | 2 | 755.37  | -11.72 |

|                                                                          |    |                       |                            |     |    |    |       |                                                      |         |        |       |   |         |        |
|--------------------------------------------------------------------------|----|-----------------------|----------------------------|-----|----|----|-------|------------------------------------------------------|---------|--------|-------|---|---------|--------|
| [P02911]ARGT_SALTY Lysine-arginine-ornithine-binding periplasmic protein | 12 |                       | LDAALQDEVAASEGFLKQPAGK     | 176 | 22 | 3  | 23.77 | b5b6b15                                              | 2258.17 | 99.748 | 3316  | 3 | 753.39  | 0.00   |
| [P02911]ARGT_SALTY Lysine-arginine-ornithine-binding periplasmic protein | 13 |                       | IGTDTTYAPFSSKDAK           | 29  | 16 | 3  | 24.32 | b5y9y10                                              | 1701.82 | 47.457 | 3087  | 3 | 567.94  | -9.18  |
| [P02911]ARGT_SALTY Lysine-arginine-ornithine-binding periplasmic protein | 14 |                       | QQEIAFSDKLYAADSR           | 99  | 16 | 3  | 17.79 | b8b12y6                                              | 1841.90 | 68.217 | 2475  | 3 | 614.64  | -2.92  |
| [P02911]ARGT_SALTY Lysine-arginine-ornithine-binding periplasmic protein | 15 |                       | TKGVDDVVAYANQDLIYSDLTAGR   | 153 | 23 | 4  | 18.23 | b10b12y4y12                                          | 2469.26 | 77.437 | 2062  | 3 | 823.76  | -2.18  |
| [P02911]ARGT_SALTY Lysine-arginine-ornithine-binding periplasmic protein | 16 | Phosphoryl STY(14)    | GVDVVAYANQDLIYSDLTAGR      | 155 | 21 | 8  | 45.06 | b9b12°b12y7y10y11°y11y12                             | 2320.05 | 81.534 | 3673  | 4 | 580.77  | -12.31 |
| [P66451]RS17_SALTY 30S ribosomal protein S17                             | 1  | Carbamidomethyl+C(10) | MHVHDENNECGIGDVVEIR        | 43  | 19 | 13 | 76.58 | b2b3b5b9y2y3y4y5y7°y7y9y10y19                        | 2222.98 | 55.093 | 42221 | 3 | 741.66  | -7.14  |
| [P66451]RS17_SALTY 30S ribosomal protein S17                             | 2  |                       | SIVVAIER                   | 19  | 8  | 4  | 41.71 | y4y5y6y8                                             | 886.53  | 51.635 | 40672 | 2 | 443.77  | -11.91 |
| [P66451]RS17_SALTY 30S ribosomal protein S17                             | 3  |                       | SWTLVR                     | 71  | 6  | 2  | 27.43 | y3y4                                                 | 761.42  | 55.536 | 36051 | 2 | 381.21  | -14.75 |
| [P26976]PHON_SALTY Non-ecific acid phohatase                             | 1  |                       | NGSYPSGHTAYGTLLALVLSEARPER | 150 | 26 | 7  | 27.17 | b2*b2y3y5y7y10y26                                    | 2759.38 | 95.978 | 36915 | 4 | 690.60  | -12.48 |
| [P26976]PHON_SALTY Non-ecific acid phohatase                             | 2  |                       | NLLTMGGYYATASAK            | 108 | 15 | 6  | 60.92 | b3b5y10y11y12y13                                     | 1560.78 | 69.476 | 34818 | 2 | 780.89  | 2.89   |
| [P26976]PHON_SALTY Non-ecific acid phohatase                             | 3  |                       | IFSPVVGAK                  | 85  | 9  | 6  | 31.3  | b2b3y1y3y4y9                                         | 917.54  | 50.917 | 30386 | 2 | 459.27  | -9.58  |
| [P26976]PHON_SALTY Non-ecific acid phohatase                             | 4  | Carbamidomethyl+C(3)  | VICGAHWQSDVDAGR            | 191 | 15 | 6  | 30.4  | b9y3y5y9*y9y15                                       | 1670.75 | 44.873 | 19366 | 3 | 557.59  | -13.01 |
| [P26976]PHON_SALTY Non-ecific acid phohatase                             | 5  |                       | YVGAVEFAR                  | 206 | 9  | 4  | 31.3  | b3b5y7y9                                             | 1011.51 | 51.030 | 17282 | 2 | 506.26  | -13.15 |
| [P26976]PHON_SALTY Non-ecific acid phohatase                             | 6  |                       | QAAEDADVSVENIAR            | 70  | 15 | 17 | 97.52 | b2*b2b4b10°b10b11b13°b13y9°y9y10y11°y11*y11y12y13y15 | 1587.76 | 50.505 | 10009 | 2 | 794.38  | -0.08  |
| [P26976]PHON_SALTY Non-ecific acid phohatase                             | 7  |                       | NLLTMGGYYATASAKK           | 108 | 16 | 3  | 17.79 | b10y10y12                                            | 1688.84 | 63.595 | 8579  | 3 | 563.62  | -14.24 |
| [P26976]PHON_SALTY Non-ecific acid phohatase                             | 8  |                       | INPKDTPETWNMLK             | 94  | 14 | 4  | 19.96 | b1b8b11y10                                           | 1686.87 | 82.748 | 1709  | 3 | 562.96  | 12.52  |
| [P26976]PHON_SALTY Non-ecific acid phohatase                             | 9  |                       | AQELAR                     | 176 | 6  | 1  | 13.9  | b5                                                   | 687.37  | 27.552 | 4251  | 1 | 687.37  | -10.21 |
| [P26976]PHON_SALTY Non-ecific acid phohatase                             | 10 | Carbamidomethyl+C(12) | TRPFVLFNHSTCRPEDENTLR      | 128 | 21 | 5  | 27.85 | b4b8b10y8y13                                         | 2589.32 | 49.890 | 1994  | 4 | 648.08  | 20.56  |
| [P26976]PHON_SALTY Non-ecific acid phohatase                             | 11 |                       | DTPETWNMLKNLLTMGGYYATASAK  | 98  | 25 | 3  | 12.79 | b12y7y9                                              | 2776.33 | 92.125 | 3438  | 3 | 926.11  | -0.70  |
| [P26976]PHON_SALTY Non-ecific acid phohatase                             | 12 | Carbamidomethyl+C(16) | YYMRTRPFVLFNHSTCRPEDENTLR  | 124 | 25 | 5  | 22.33 | b9y9°y9y10°y10                                       | 3202.54 | 84.999 | 2968  | 3 | 1068.18 | 1.52   |
| [P26976]PHON_SALTY Non-ecific acid phohatase                             | 13 |                       | EELNDKNLLSK                | 230 | 12 | 3  | 23.01 | b6y6y9                                               | 1416.72 | 54.797 | 1772  | 2 | 708.86  | -10.60 |
| [P26976]PHON_SALTY Non-ecific acid phohatase                             | 14 | Oxidation+M(5)        | NLLTMGGYYATASAKK           | 108 | 16 | 7  | 39.12 | b3b4°b4b6°b6b8y13                                    | 1704.87 | 84.122 | 6405  | 2 | 852.94  | 2.22   |
| [P26976]PHON_SALTY Non-ecific acid phohatase                             | 15 |                       | LTMGGYYATASAKK             | 110 | 14 | 0  | 4.15  |                                                      | 1461.75 | 63.579 | 1568  | 2 | 731.38  | 4.59   |
| [P26976]PHON_SALTY Non-ecific acid phohatase                             | 16 |                       | IFSPVVGAK                  | 85  | 9  | 0  | 1.51  |                                                      | 899.53  | 50.907 | 1899  | 2 | 450.27  | 0.68   |
| [Q9L4T0]LUXS_SALTY S-ribosylhomocysteine lyase                           | 1  |                       | TMNTPHGDAITVFDLR           | 23  | 16 | 12 | 83.43 | b2b3b4b6b11y2y4y5y6y10y12y16                         | 1787.85 | 70.795 | 41335 | 3 | 596.62  | -12.56 |
| [Q9L4T0]LUXS_SALTY S-ribosylhomocysteine lyase                           | 2  | Carbamidomethyl+C(2)  | FCIPNKEVMPEK               | 39  | 12 | 9  | 35.29 | b2b7y3y4°y4y9*y9y12*y12                              | 1491.71 | 51.892 | 35516 | 3 | 497.91  | -12.77 |



|                                               |    |                       |                                      |     |    |    |        |                                                    |         |         |        |   |         |        |
|-----------------------------------------------|----|-----------------------|--------------------------------------|-----|----|----|--------|----------------------------------------------------|---------|---------|--------|---|---------|--------|
| Q9L4T0 LUXS_SALTY S-ribosylhomocysteine lyase | 3  |                       | TGFYMSLIGTPDEQR                      | 84  | 15 | 4  | 32.78  | b3b14y7y8                                          | 1714.82 | 78.233  | 24551  | 2 | 857.91  | 4.56   |
| Q9L4T0 LUXS_SALTY S-ribosylhomocysteine lyase | 4  | Carbamidomethyl+C(15) | VQDQNQIPELNVYQCGTYQMHSLS<br>SEAQDIAR | 113 | 31 | 7  | 32.16  | b10y4y10y11y21y24y31                               | 3635.72 | 74.952  | 20312  | 3 | 1212.58 | 8.80   |
| Q9L4T0 LUXS_SALTY S-ribosylhomocysteine lyase | 5  |                       | PLLDSDFAVDHTR                        | 1   | 12 | 4  | 38.3   | b4y3y5y10                                          | 1370.68 | 61.656  | 62288  | 3 | 457.56  | -19.15 |
| Q9L4T0 LUXS_SALTY S-ribosylhomocysteine lyase | 6  |                       | MPLLDSDFAVDHTR                       | 0   | 13 | 3  | 30.59  | y3y5y9                                             | 1501.77 | 49.862  | 14120  | 3 | 501.26  | 12.19  |
| Q9L4T0 LUXS_SALTY S-ribosylhomocysteine lyase | 7  |                       | EVMPEK                               | 45  | 6  | 1  | 13.9   | b3                                                 | 732.35  | 57.626  | 2997   | 1 | 732.35  | -14.17 |
| Q9L4T0 LUXS_SALTY S-ribosylhomocysteine lyase | 8  |                       | GIHTLEHLFAGFMR                       | 51  | 14 | 3  | 19.96  | b5y8y10                                            | 1628.80 | 122.407 | 1935   | 2 | 814.90  | -21.13 |
| Q9L4T0 LUXS_SALTY S-ribosylhomocysteine lyase | 9  | Carbamidomethyl+C(18) | DHLNGNGVEIIDISPMGCR                  | 65  | 19 | 3  | 23.26  | b10b11y9                                           | 2097.03 | 63.663  | 1855   | 2 | 1049.02 | 22.00  |
| Q9L4T0 LUXS_SALTY S-ribosylhomocysteine lyase | 10 |                       | VADAWKAAMADV LK                      | 99  | 14 | 3  | 27.74  | b3b4b13                                            | 1488.78 | 90.226  | 350190 | 2 | 744.90  | -3.36  |
| Q9L4T0 LUXS_SALTY S-ribosylhomocysteine lyase | 11 |                       | TGFYMSLIGTPDEQRVADAWK                | 84  | 21 | 3  | 14.36  | b3y5y12                                            | 2385.17 | 108.997 | 3735   | 3 | 795.73  | 6.55   |
| Q9L4T0 LUXS_SALTY S-ribosylhomocysteine lyase | 12 |                       | EVMPEKGIHTLEHLFAGFMR                 | 45  | 20 | 7  | 54.11  | b10b13y3y5y8y11y14                                 | 2342.16 | 98.679  | 3204   | 3 | 781.39  | -5.94  |
| Q9L4T0 LUXS_SALTY S-ribosylhomocysteine lyase | 13 | Phosphoryl STY(4)     | GIHTLEHLFAGFMR                       | 51  | 14 | 3  | 19.96  | b3y7y10                                            | 1708.81 | 66.650  | 65317  | 2 | 854.91  | 11.00  |
| Q9L4T0 LUXS_SALTY S-ribosylhomocysteine lyase | 14 | Oxidation+M(1)        | MPLLDSDFAVDHTR                       | 0   | 13 | 3  | 30.59  | y6y8y11                                            | 1517.74 | 81.973  | 2724   | 3 | 506.58  | -2.49  |
| Q9L4T0 LUXS_SALTY S-ribosylhomocysteine lyase | 15 | Oxidation+M(5)        | TGFYMSLIGTPDEQR                      | 84  | 15 | 6  | 30.4   | b9y4°y4y5°y5y9                                     | 1730.81 | 59.736  | 1583   | 3 | 577.61  | 3.81   |
| Q9L4T0 LUXS_SALTY S-ribosylhomocysteine lyase | 16 | Oxidation+M(13)       | GIHTLEHLFAGFMR                       | 51  | 14 | 7  | 52.31  | b4°b4b12y4y5y8y10                                  | 1644.81 | 91.422  | 1505   | 2 | 822.91  | -12.39 |
| Q7CQ71 RL25_SALTY 50S ribosomal protein L25   | 1  |                       | AEFYSEVLT LVVDGK                     | 53  | 15 | 18 | 137.53 | b2b3b4b7°b7b8b13y2y3°y3y4°y4y5y6y7y8y11y15         | 1669.87 | 100.857 | 61578  | 2 | 835.44  | -0.51  |
| Q7CQ71 RL25_SALTY 50S ribosomal protein L25   | 2  |                       | LTHIDFVR                             | 85  | 8  | 7  | 50.47  | b2°b2b5y3y4y5y8                                    | 1000.55 | 50.437  | 11951  | 2 | 500.78  | -4.82  |
| Q7CQ71 RL25_SALTY 50S ribosomal protein L25   | 3  |                       | FP AIYGGSEAPIAIELDHDQVMNM<br>QAK     | 25  | 28 | 3  | 22.22  | b12b13y10                                          | 3058.50 | 111.382 | 2752   | 4 | 765.38  | -0.72  |
| Q7CQ71 RL25_SALTY 50S ribosomal protein L25   | 4  |                       | MFTINAEVR                            | 0   | 9  | 3  | 31.3   | b6b7y4                                             | 1080.55 | 42.502  | 20175  | 2 | 540.78  | 2.94   |
| Q7CQ71 RL25_SALTY 50S ribosomal protein L25   | 5  |                       | AANKFP AIYGGSEAPIAIELDHDQ<br>VMNMQAK | 21  | 32 | 19 | 125.58 | b4°b4b5b7°b7b8°b8b9y5y7y9y12y13°y13y17y18y20y22y23 | 3442.70 | 83.517  | 132173 | 4 | 861.43  | -5.04  |
| Q7CQ71 RL25_SALTY 50S ribosomal protein L25   | 6  |                       | LTHIDFVRA                            | 85  | 9  | 4  | 55.62  | y4y5y6y7                                           | 1071.59 | 53.259  | 44556  | 2 | 536.30  | -8.09  |
| Q7CQ71 RL25_SALTY 50S ribosomal protein L25   | 7  |                       | THIDFVR                              | 86  | 7  | 0  | 1.13   |                                                    | 887.46  | 50.433  | 9596   | 2 | 444.24  | -10.45 |
| Q8ZQT5 TOLB_SALTY Protein tolB                | 1  |                       | SNNTEPTWFPDSQTLAFTSDQAG<br>RPQVYK    | 287 | 29 | 12 | 41.09  | b2b4°b4b5°b5b8y2y13y14y21y24y29                    | 3285.56 | 77.473  | 84261  | 3 | 1095.86 | 5.72   |
| Q8ZQT5 TOLB_SALTY Protein tolB                | 2  |                       | WAGPGAAPEDIGGIVAADLR                 | 43  | 20 | 9  | 60.22  | b6b7b13b14y2y4y5y13y20                             | 1936.00 | 85.323  | 79525  | 2 | 968.50  | 3.22   |
| Q8ZQT5 TOLB_SALTY Protein tolB                | 3  |                       | VSDYDGYNQFVVHR                       | 183 | 14 | 5  | 43.71  | b10y4y10y12y13                                     | 1698.77 | 53.494  | 68794  | 3 | 566.93  | -11.57 |
| Q8ZQT5 TOLB_SALTY Protein tolB                | 4  |                       | IEITQGVSARPIGVVPFK                   | 24  | 19 | 9  | 50.97  | b2b11y2y3y12y14y16y18y19                           | 2026.11 | 70.202  | 66130  | 3 | 676.04  | -10.66 |
| Q8ZQT5 TOLB_SALTY Protein tolB                | 5  |                       | LAYVTFESGR                           | 213 | 10 | 7  | 62.53  | b2b3y5y6y8y9y10                                    | 1142.58 | 57.241  | 45759  | 2 | 571.79  | -1.92  |
| Q8ZQT5 TOLB_SALTY Protein tolB                | 6  |                       | IAYVVQTNGGQFPYELR                    | 166 | 17 | 8  | 16.91  | b12°b12y2y5°y5y12°y12°y12                          | 1955.01 | 73.103  | 37441  | 2 | 978.01  | 1.56   |
| Q8ZQT5 TOLB_SALTY Protein tolB                | 7  |                       | MNINGGAAQR                           | 316 | 10 | 9  | 59.52  | b2°b2b3y6y7°y7y8y9y10                              | 1031.50 | 27.733  | 35875  | 2 | 516.25  | -5.80  |

|                                            |    |                       |                                    |     |    |    |        |                                                   |         |         |       |   |         |        |
|--------------------------------------------|----|-----------------------|------------------------------------|-----|----|----|--------|---------------------------------------------------|---------|---------|-------|---|---------|--------|
| Q8ZQT5 TOLB_SALTY Protein tolB             | 8  |                       | SALVIQTLANGAVR                     | 223 | 14 | 9  | 70.09  | b1b3b4b11y3y7y9y11y14                             | 1412.82 | 70.594  | 21936 | 2 | 706.91  | -1.12  |
| Q8ZQT5 TOLB_SALTY Protein tolB             | 9  |                       | SPQPLMSPAWSPDGSK                   | 197 | 16 | 7  | 29.27  | b3°b3y1y6y7°y7y11                                 | 1684.80 | 59.200  | 15010 | 3 | 562.27  | 1.52   |
| Q8ZQT5 TOLB_SALTY Protein tolB             | 10 |                       | HNGAPAFSPDGTK                      | 244 | 13 | 13 | 147.05 | b2b3*b3b4b7b8b10y3y5y7y9y11y12                    | 1298.63 | 32.105  | 14102 | 2 | 649.82  | 13.16  |
| Q8ZQT5 TOLB_SALTY Protein tolB             | 11 |                       | LAFALSK                            | 257 | 7  | 4  | 41.34  | b3y2y3y5                                          | 749.45  | 56.019  | 13211 | 2 | 375.23  | -14.17 |
| Q8ZQT5 TOLB_SALTY Protein tolB             | 12 |                       | TGSLNLNVMDLASGQIR                  | 264 | 17 | 5  | 16.91  | b6b10y11°y11y17                                   | 1837.95 | 89.266  | 12324 | 2 | 919.48  | 3.65   |
| Q8ZQT5 TOLB_SALTY Protein tolB             | 13 |                       | ITWEGSQNQDADVSSDGK                 | 326 | 18 | 4  | 27.46  | b10y5y6y12                                        | 1936.84 | 55.915  | 2204  | 2 | 968.93  | -4.41  |
| Q8ZQT5 TOLB_SALTY Protein tolB             | 14 |                       | YAGHTASDEVFEK                      | 142 | 13 | 3  | 30.59  | y6y9y11                                           | 1453.64 | 36.711  | 44844 | 3 | 485.22  | -13.02 |
| Q8ZQT5 TOLB_SALTY Protein tolB             | 15 |                       | FMVMVSSNNGQQHIAK                   | 344 | 16 | 4  | 17.79  | b8y7y11*y11                                       | 1790.84 | 50.188  | 22065 | 3 | 597.62  | -14.04 |
| Q8ZQT5 TOLB_SALTY Protein tolB             | 16 |                       | FNPLDR                             | 67  | 6  | 3  | 40.96  | y3y4y5                                            | 761.39  | 45.065  | 7193  | 2 | 381.20  | -11.78 |
| Q8ZQT5 TOLB_SALTY Protein tolB             | 17 |                       | QVASFPR                            | 237 | 7  | 5  | 41.34  | b3*b3b6*b6y5                                      | 804.42  | 67.366  | 6934  | 1 | 804.42  | -15.17 |
| Q8ZQT5 TOLB_SALTY Protein tolB             | 18 |                       | LPATDGQVK                          | 413 | 9  | 3  | 31.3   | b3b6y8                                            | 928.50  | 49.301  | 5284  | 2 | 464.76  | -7.43  |
| Q8ZQT5 TOLB_SALTY Protein tolB             | 19 |                       | LPATDGQVKSPAWSPYL                  | 413 | 17 | 4  | 16.91  | b14°b14y9y13                                      | 1829.95 | 89.811  | 29287 | 2 | 915.48  | 5.80   |
| Q8ZQT5 TOLB_SALTY Protein tolB             | 20 |                       | ITWEGSQNQDADVSSDGKFMVMVSSNNGQQHIAK | 326 | 34 | 5  | 21.96  | b6b8b9°b9y9                                       | 3708.72 | 96.147  | 25489 | 3 | 1236.91 | 3.95   |
| Q8ZQT5 TOLB_SALTY Protein tolB             | 21 |                       | ARLPATDGQVK                        | 411 | 11 | 5  | 68.14  | b3b5b7b9y6                                        | 1155.64 | 28.920  | 11164 | 2 | 578.33  | -4.33  |
| Q8ZQT5 TOLB_SALTY Protein tolB             | 22 |                       | QWLRYAGHTASDEVFEK                  | 138 | 17 | 3  | 16.91  | b3y5y13                                           | 2037.00 | 106.048 | 3587  | 2 | 1019.00 | 9.05   |
| Q8ZQT5 TOLB_SALTY Protein tolB             | 23 |                       | QVASFPRHNGAPAFSPDGTK               | 237 | 20 | 4  | 14.89  | b4°b4y6y9                                         | 2084.02 | 70.575  | 2252  | 4 | 521.76  | -5.86  |
| Q8ZQT5 TOLB_SALTY Protein tolB             | 24 |                       | VIQTLANGAVR                        | 226 | 11 | 0  | 3.4    |                                                   | 1141.66 | 70.557  | 19290 | 2 | 571.33  | -10.80 |
| Q8ZQT5 TOLB_SALTY Protein tolB             | 25 |                       | DYDGYNQFVVHR                       | 185 | 12 | 1  | 7.38   | b5                                                | 1512.71 | 53.536  | 1935  | 2 | 756.86  | 13.56  |
| P02936 OMPA_SALTY Outer membrane protein A | 1  | Carbamidomethyl+C(13) | GMGESNPVTGNTCDNVKPR                | 302 | 19 | 18 | 142.62 | b2b3y2y3y5y7°y7y8y9y10*y10y11*y11y13°y13y15y17y19 | 2032.90 | 37.318  | 94414 | 3 | 678.30  | -10.69 |
| P02936 OMPA_SALTY Outer membrane protein A | 2  |                       | STLKPEGQQALDQLYSQSLNDPK            | 231 | 24 | 9  | 48.66  | b4b13y2y3y6y9y10y11y24                            | 2673.38 | 89.227  | 80992 | 3 | 891.80  | 1.19   |
| P02936 OMPA_SALTY Outer membrane protein A | 3  | Carbamidomethyl+C(6)  | AALIDCLAPDR                        | 321 | 11 | 9  | 71.67  | b2b3b4y3y4y7y8°y8y11                              | 1214.62 | 61.756  | 59869 | 2 | 607.81  | -2.81  |
| P02936 OMPA_SALTY Outer membrane protein A | 4  |                       | SDVLFNFNK                          | 222 | 9  | 7  | 39.08  | b1b2y2y4y5y6y9                                    | 1083.54 | 68.288  | 48972 | 2 | 542.27  | -9.01  |
| P02936 OMPA_SALTY Outer membrane protein A | 5  |                       | GVKDVVTQPQA                        | 339 | 11 | 11 | 66.61  | b2b5b6b8°b8y1y3*y3y4y5y11                         | 1141.61 | 36.918  | 32580 | 2 | 571.31  | -8.55  |
| P02936 OMPA_SALTY Outer membrane protein A | 6  |                       | LGYPITDDLVDYTR                     | 103 | 14 | 5  | 27.74  | y7y9y10°y10y14                                    | 1640.81 | 75.891  | 13982 | 2 | 820.91  | -1.41  |
| P02936 OMPA_SALTY Outer membrane protein A | 7  |                       | IGSDAYNQLSEK                       | 267 | 13 | 8  | 35.45  | b4b5°b5b13y2y8y10y13                              | 1381.65 | 37.829  | 13412 | 2 | 691.33  | -3.53  |
| P02936 OMPA_SALTY Outer membrane protein A | 8  |                       | FGQQEAAPVVAPAPAPEVQTK              | 194 | 23 | 7  | 48.43  | b9b10b11y6y10y12y23                               | 2303.19 | 54.011  | 10039 | 3 | 768.40  | -5.72  |
| P02936 OMPA_SALTY Outer membrane protein A | 9  |                       | DVVTQPQA                           | 342 | 8  | 7  | 33.93  | b5°b5y6y7°y7*y7y8                                 | 857.45  | 32.431  | 4020  | 2 | 429.23  | 10.25  |
| P02936 OMPA_SALTY Outer membrane protein A | 10 |                       | LEYQWTNNIGDANTIGTRPDNGLLSVGVSYSR   | 163 | 31 | 4  | 11.47  | b10y7y12*y12                                      | 3423.76 | 80.624  | 3055  | 4 | 856.70  | 20.82  |
| P02936 OMPA_SALTY Outer membrane protein A | 11 |                       | MPYKGDNINGAYK                      | 81  | 13 | 3  | 21.35  | b9b11y8                                           | 1470.71 | 83.187  | 7650  | 3 | 490.91  | 3.82   |

|                                                      |    |                                             |                                  |     |    |    |       |                                         |         |         |        |   |         |        |
|------------------------------------------------------|----|---------------------------------------------|----------------------------------|-----|----|----|-------|-----------------------------------------|---------|---------|--------|---|---------|--------|
| P02936 OMPA_SALTY Outer membrane protein A           | 12 | Carbamidomethyl+C(17)                       | ISARGMGESNPVTGNTCDNVKPR          | 298 | 23 | 3  | 23.57 | b3b7b8                                  | 2460.18 | 69.763  | 4421   | 3 | 820.73  | 1.39   |
| P02936 OMPA_SALTY Outer membrane protein A           | 13 | Phosphoryl STY(7)                           | GVKDVVTQPQA                      | 339 | 11 | 3  | 25.06 | b5b9y4                                  | 1221.59 | 30.636  | 152413 | 2 | 611.30  | 7.49   |
| P0A6B1 ACP_SALTY Acyl carrier protein                | 1  |                                             | IIGQLGVK                         | 10  | 9  | 11 | 76.65 | b2b8y1y3y4y5*y5y7*y7y8y9                | 956.57  | 48.730  | 180043 | 2 | 478.79  | -11.93 |
| P0A6B1 ACP_SALTY Acyl carrier protein                | 2  |                                             | ITTVQAAIDYINGHA                  | 62  | 16 | 8  | 50.32 | y1y4y5y8y10y12y13°y16                   | 1714.85 | 82.154  | 9103   | 3 | 572.29  | -13.38 |
| Q7CQN4 LPP1_SALTY Major outer membrane lipoprotein 1 | 1  |                                             | VDQLSNDVNAMR                     | 40  | 12 | 6  | 51.03 | b3y3y4y7y9y12                           | 1361.65 | 48.463  | 31729  | 2 | 681.33  | 0.18   |
| Q7CQN4 LPP1_SALTY Major outer membrane lipoprotein 1 | 2  |                                             | SDVQAAKDDAAR                     | 52  | 12 | 14 | 77.79 | b1b2°b2b4b6y1y2y3y4y7y8y9*y9y12         | 1246.59 | 17.677  | 21080  | 2 | 623.80  | -6.27  |
| Q7CQN4 LPP1_SALTY Major outer membrane lipoprotein 1 | 3  |                                             | IDQLSSDVQTLNAK                   | 26  | 14 | 6  | 11.36 | b7°b12*b12y2y8y14                       | 1531.82 | 66.124  | 14799  | 2 | 766.41  | 12.35  |
| P0A7X0 RS8_SALTY 30S ribosomal protein S8            | 1  |                                             | SMQDPIADMLTR                     | 1   | 12 | 12 | 124.9 | b2b3b4b6y3y4y5y6y8y9y10y12              | 1377.65 | 77.922  | 105711 | 2 | 689.33  | 0.00   |
| P0A7X0 RS8_SALTY 30S ribosomal protein S8            | 2  |                                             | AVVESIQR                         | 69  | 8  | 12 | 68.77 | b2b5°b5b7y1y4*y4y5°y5y6*y6y8            | 901.50  | 32.498  | 75728  | 2 | 451.25  | -12.93 |
| P0A7X0 RS8_SALTY 30S ribosomal protein S8            | 3  |                                             | VSRPGLR                          | 77  | 7  | 5  | 41.34 | y1y3y4y6y7                              | 784.47  | 21.917  | 13707  | 2 | 392.74  | -14.16 |
| P0A7X0 RS8_SALTY 30S ribosomal protein S8            | 4  |                                             | VEGDTKPELELTk                    | 50  | 14 | 5  | 32.52 | b7b9b12y12°y12                          | 1571.84 | 64.570  | 7943   | 2 | 786.42  | -9.94  |
| P0A7X0 RS8_SALTY 30S ribosomal protein S8            | 5  |                                             | YFQgK                            | 64  | 5  | 2  | 27.05 | b4y3                                    | 642.33  | 32.421  | 2902   | 1 | 642.33  | 6.08   |
| P0A7X0 RS8_SALTY 30S ribosomal protein S8            | 6  |                                             | VMAGLGIAVVSTSK                   | 94  | 14 | 4  | 27.74 | y3y4°y4y9                               | 1332.76 | 68.664  | 2153   | 2 | 666.88  | 0.37   |
| P0A7X0 RS8_SALTY 30S ribosomal protein S8            | 7  |                                             | GVMtDR                           | 108 | 6  | 2  | 27.43 | b5y5                                    | 678.33  | 111.449 | 2072   | 1 | 678.33  | 7.02   |
| P0A7X0 RS8_SALTY 30S ribosomal protein S8            | 8  |                                             | MSMQDPIADMLTR                    | 0   | 13 | 4  | 26.12 | b12y10°y10y11                           | 1508.71 | 68.923  | 1716   | 2 | 754.86  | 11.49  |
| P0A7X0 RS8_SALTY 30S ribosomal protein S8            | 9  | Carbamidomethyl+C(13)                       | AARQAGLGGEIIcYVA                 | 114 | 16 | 4  | 17.79 | b10b13y10°y10                           | 1648.85 | 56.547  | 3268   | 3 | 550.29  | -0.37  |
| P0A7X0 RS8_SALTY 30S ribosomal protein S8            | 10 |                                             | NGQAANKAAVTMPSSK                 | 15  | 16 | 3  | 17.79 | b3b5y9                                  | 1574.81 | 104.350 | 1937   | 2 | 787.91  | 6.74   |
| Q8ZP20 TREA_SALTY Periplasmic trehalase              | 1  |                                             | VAAAAQAHLQPGGLATTSVK             | 428 | 21 | 7  | 28.17 | b1b2b10b11y8y10y21                      | 2004.11 | 57.393  | 35851  | 3 | 668.71  | -5.66  |
| Q8ZP20 TREA_SALTY Periplasmic trehalase              | 2  |                                             | TFADAIPNSDPLMILADYR              | 68  | 19 | 14 | 64.51 | b6°b6b14*b14b16y2y4y5°y5y9y13°y13y14y19 | 2123.07 | 101.221 | 34969  | 2 | 1062.04 | 9.20   |
| Q8ZP20 TREA_SALTY Periplasmic trehalase              | 3  | Carbamidomethyl+C(6); Carbamidomethyl+C(12) | MLDLICPQEKPCDSVPSTRPASLS ATPK    | 534 | 29 | 8  | 38.83 | b2b3b4y3y10y25y27y29                    | 3199.56 | 63.793  | 21845  | 4 | 800.65  | -5.88  |
| Q8ZP20 TREA_SALTY Periplasmic trehalase              | 4  |                                             | SQPPFFAFMVELLAQHEGDDALK EYLPQLQK | 212 | 31 | 4  | 17.33 | b5b8b12*b12                             | 3589.78 | 119.144 | 15582  | 4 | 898.20  | -5.17  |
| Q8ZP20 TREA_SALTY Periplasmic trehalase              | 5  |                                             | VADMVANFGYEIDAWGHIPNGNR          | 183 | 23 | 4  | 23.57 | b3b5b6y23                               | 2546.16 | 100.864 | 11962  | 3 | 849.39  | -11.60 |
| Q8ZP20 TREA_SALTY Periplasmic trehalase              | 6  |                                             | WDSLLPLPESYVVPgGR                | 142 | 17 | 3  | 16.91 | b13y4y9                                 | 1884.99 | 91.416  | 9615   | 2 | 943.00  | 3.95   |
| Q8ZP20 TREA_SALTY Periplasmic trehalase              | 7  |                                             | SNPNRPATEIYR                     | 296 | 12 | 6  | 33.22 | b2y2y3y7y10y12                          | 1417.72 | 32.178  | 6346   | 2 | 709.36  | -0.60  |
| Q8ZP20 TREA_SALTY Periplasmic trehalase              | 8  |                                             | LEDGSVLNR                        | 266 | 9  | 3  | 31.3  | b6b7y7                                  | 1002.54 | 25.066  | 3779   | 2 | 501.77  | 14.73  |
| Q8ZP20 TREA_SALTY Periplasmic trehalase              | 9  |                                             | FLTNVQHTYDR                      | 486 | 11 | 5  | 25.06 | b7b9°b9y6°y6                            | 1393.67 | 42.383  | 10182  | 3 | 465.23  | -14.01 |
| Q8ZP20 TREA_SALTY Periplasmic trehalase              | 10 |                                             | SQPPFFAFMVELLAQHEGDDALK          | 212 | 23 | 3  | 13.48 | b7b13y11                                | 2590.26 | 90.275  | 9687   | 3 | 864.09  | -3.20  |
| Q8ZP20 TREA_SALTY Periplasmic trehalase              | 11 |                                             | DTPRPESWVEDIATAK                 | 280 | 16 | 4  | 31.73 | b8b12y10y11                             | 1814.86 | 62.269  | 4369   | 3 | 605.63  | -16.21 |

|                                         |    |                                                  |                                             |     |    |    |        |                                                           |         |         |       |   |         |        |
|-----------------------------------------|----|--------------------------------------------------|---------------------------------------------|-----|----|----|--------|-----------------------------------------------------------|---------|---------|-------|---|---------|--------|
| Q8ZP20 TREA_SALTY Periplasmic trehalase | 12 |                                                  | TYYLSR                                      | 206 | 6  | 1  | 13.9   | y4                                                        | 802.41  | 37.254  | 2778  | 2 | 401.71  | 2.89   |
| Q8ZP20 TREA_SALTY Periplasmic trehalase | 13 |                                                  | LFPDQK                                      | 62  | 6  | 1  | 13.9   | b5                                                        | 747.39  | 46.971  | 2138  | 1 | 747.39  | -12.17 |
| Q8ZP20 TREA_SALTY Periplasmic trehalase | 14 |                                                  | NVEKWDSLLPLPESYVVPGGR                       | 138 | 21 | 4  | 22.49  | b6y5y10y12                                                | 2355.23 | 87.667  | 35966 | 3 | 785.75  | -3.01  |
| Q8ZP20 TREA_SALTY Periplasmic trehalase | 15 | Carbamidomethyl+C(6); Carbamidomethyl+C(12)      | MLDLICPQEKPCDSVPSTRPASLS<br>ATPTKTPSAATQ    | 534 | 36 | 3  | 16.65  | y8y11y21                                                  | 3855.89 | 63.763  | 29492 | 4 | 964.73  | -0.63  |
| Q8ZP20 TREA_SALTY Periplasmic trehalase | 16 |                                                  | TYYLSRSQPPFFAFMVELLAQHEG<br>DDALK           | 206 | 29 | 9  | 45.25  | b6b8°b8b9b22y5y7y12y13                                    | 3373.65 | 114.055 | 3321  | 5 | 675.54  | -0.87  |
| Q8ZP20 TREA_SALTY Periplasmic trehalase | 17 |                                                  | TFADAIPNSDPLMILADYRMQR                      | 68  | 22 | 7  | 37.77  | b6°b6b7b13y4y6y12                                         | 2538.23 | 116.125 | 3021  | 3 | 846.75  | -5.87  |
| Q8ZP20 TREA_SALTY Periplasmic trehalase | 18 | Oxidation+M(4)                                   | VADMVANFGYEIDAWGHIPNGNR                     | 183 | 23 | 3  | 13.48  | b10b22y11                                                 | 2562.17 | 56.857  | 40161 | 3 | 854.73  | -5.53  |
| Q8ZP20 TREA_SALTY Periplasmic trehalase | 19 | Oxidation+M(4)                                   | AIEMHLWNNKEGWYADYDLK                        | 380 | 20 | 3  | 21.68  | y6y8y12                                                   | 2512.19 | 92.070  | 3807  | 4 | 628.80  | 12.54  |
| Q8ZP20 TREA_SALTY Periplasmic trehalase | 20 | Oxidation+M(9)                                   | SQPPFFAFMVELLAQHEGDDALK                     | 212 | 23 | 3  | 13.48  | b7b14y12                                                  | 2606.23 | 102.393 | 3607  | 3 | 869.41  | -12.37 |
| Q8ZP20 TREA_SALTY Periplasmic trehalase | 21 | Oxidation+M(13)                                  | TFADAIPNSDPLMILADYR                         | 68  | 19 | 4  | 29.33  | b6b16y3y4                                                 | 2139.03 | 66.649  | 1633  | 2 | 1070.02 | -5.25  |
| Q8ZP20 TREA_SALTY Periplasmic trehalase | 22 |                                                  | PNRPATEIYR                                  | 298 | 10 | 0  | 2.64   |                                                           | 1216.64 | 32.168  | 6405  | 2 | 608.82  | -5.72  |
| Q8ZP20 TREA_SALTY Periplasmic trehalase | 23 |                                                  | SNPNRPATEIYR                                | 296 | 12 | 0  | 2.64   |                                                           | 1400.67 | 32.194  | 1684  | 3 | 467.56  | -11.77 |
| P26982 DEGP_SALTY Protease do           | 1  |                                                  | AGDVITSLNGKPISSFAALR                        | 332 | 20 | 12 | 85.26  | b1b3b4b5y1y2y4y7y9y11y12y15                               | 2017.09 | 74.653  | 74201 | 3 | 673.03  | -9.92  |
| P26982 DEGP_SALTY Protease do           | 2  |                                                  | GAFVSQVMPNSSAAK                             | 313 | 15 | 8  | 44.38  | b3b4y8y10°y10°y10y11y15                                   | 1493.74 | 53.135  | 49601 | 2 | 747.38  | 1.63   |
| P26982 DEGP_SALTY Protease do           | 3  |                                                  | GYVVTTNNHVVDNASVIK                          | 124 | 17 | 17 | 145.57 | b2b3b7b9b11y1y2y3y6y7y8y9y10y13y14y15y17                  | 1828.93 | 49.865  | 48247 | 3 | 610.32  | -11.95 |
| P26982 DEGP_SALTY Protease do           | 4  |                                                  | SDIALIQIQNPK                                | 160 | 12 | 10 | 76.54  | b3b5b11°b11y2y4y6y7y9y12                                  | 1339.75 | 63.769  | 42129 | 2 | 670.38  | -6.83  |
| P26982 DEGP_SALTY Protease do           | 5  |                                                  | VGDYTVAINPFGLGGETVTSGIVS<br>ALGR            | 186 | 28 | 24 | 168.27 | b2b3b4b5°b5b6°b6b7b8°b8b12y1y2y3y4y5y6y8y9y10y12y14y20y28 | 2750.43 | 116.391 | 34732 | 3 | 917.48  | -2.13  |
| P26982 DEGP_SALTY Protease do           | 6  |                                                  | SGLNVENYENFIQTDAAINR                        | 214 | 20 | 7  | 26.08  | b4y7°y7y8y12*y12y20                                       | 2268.11 | 77.402  | 33841 | 2 | 1134.56 | 10.98  |
| P26982 DEGP_SALTY Protease do           | 7  |                                                  | AQVGTMPVGSK                                 | 352 | 11 | 8  | 48.59  | b2°b2y5y7y8°y8y9y11                                       | 1074.55 | 34.593  | 32817 | 2 | 537.78  | -10.91 |
| P26982 DEGP_SALTY Protease do           | 8  |                                                  | GELGIMGTELNSELAK                            | 289 | 16 | 7  | 66.08  | b4b5b7b8b9y11y13                                          | 1661.85 | 74.809  | 9088  | 2 | 831.43  | 4.33   |
| P26982 DEGP_SALTY Protease do           | 9  |                                                  | ISLGLLR                                     | 363 | 7  | 3  | 41.34  | y4y5y6                                                    | 771.50  | 67.925  | 19306 | 2 | 386.25  | -16.14 |
| P26982 DEGP_SALTY Protease do           | 10 |                                                  | NIAELR                                      | 443 | 6  | 1  | 13.9   | b5                                                        | 715.41  | 55.652  | 7248  | 1 | 715.41  | -6.06  |
| P26982 DEGP_SALTY Protease do           | 11 | Carbamidomethyl+C(13);Carbamidomethyl+C(25)<br>) | NFQQFFGDDSPFCQDGSFPQNSPF<br>CQGGGNGGNGGQQQK | 71  | 39 | 4  | 10.87  | b3b5y3*y3                                                 | 4240.81 | 90.715  | 4192  | 3 | 1414.28 | 14.39  |
| P26982 DEGP_SALTY Protease do           | 12 |                                                  | GDSSIYLLMQ                                  | 465 | 10 | 3  | 29.46  | b7b8y5                                                    | 1126.57 | 36.855  | 3704  | 2 | 563.79  | 21.13  |
| P26982 DEGP_SALTY Protease do           | 13 |                                                  | FMALGSGVIIDAAK                              | 110 | 14 | 3  | 25.4   | b5b6y4                                                    | 1392.75 | 32.080  | 1553  | 2 | 696.88  | -2.72  |
| P26982 DEGP_SALTY Protease do           | 14 |                                                  | RGELGIMGTELNSELAK                           | 288 | 17 | 12 | 115.41 | b3°b3b5b6b7b8b10b12b14y3y6*y6                             | 1817.92 | 68.207  | 45539 | 3 | 606.64  | -13.90 |
| P26982 DEGP_SALTY Protease do           | 15 |                                                  | GELGIMGTELNSELAKAMK                         | 289 | 19 | 3  | 15.48  | b3b13y18                                                  | 1991.99 | 63.025  | 19103 | 3 | 664.67  | -9.99  |
| P26982 DEGP_SALTY Protease do           | 16 |                                                  | VDAQRGAFVSQVMPNSSAAK                        | 308 | 20 | 7  | 42.56  | b5b6°b6b7y7*y7y13                                         | 2063.03 | 47.899  | 8356  | 4 | 516.51  | -2.60  |
| P26982 DEGP_SALTY Protease do           | 17 | Oxidation+M(6)                                   | NLTSQMVEYGQVK                               | 275 | 13 | 10 | 69.93  | b5b7°b7b8b9y5y6*y6y8°y8                                   | 1512.76 | 38.361  | 24598 | 3 | 504.92  | 14.69  |
| P26982 DEGP_SALTY Protease do           | 18 |                                                  | VVTNNHVVDNASVIK                             | 126 | 15 | 5  | 40.06  | b5b6°b6b7b10                                              | 1608.86 | 49.849  | 2146  | 2 | 804.93  | -8.65  |
| P26982 DEGP_SALTY Protease do           | 19 |                                                  | VTNNHVVDNASVIK                              | 127 | 14 | 8  | 49.09  | b4°b4b5°b5°b5b6°b6b7                                      | 1509.78 | 49.865  | 1835  | 2 | 755.39  | -14.15 |

|                                                           |    |                 |                              |     |    |    |        |                                                          |         |         |        |   |         |        |
|-----------------------------------------------------------|----|-----------------|------------------------------|-----|----|----|--------|----------------------------------------------------------|---------|---------|--------|---|---------|--------|
| P26982 DEGP_SALTY Protease do                             | 20 |                 | GAFVSQVMPNSSAAK              | 313 | 15 | 1  | 7.3    | b7                                                       | 1476.72 | 53.181  | 8250   | 2 | 738.86  | 5.46   |
| P0A1V4 KAD_SALTY Adenylate kinase                         | 1  |                 | VDGTQAVADVR                  | 195 | 11 | 10 | 39.38  | b1b2b3°b3b6°b6y2y4y5y11                                  | 1130.57 | 36.344  | 61603  | 2 | 565.79  | -5.83  |
| P0A1V4 KAD_SALTY Adenylate kinase                         | 2  |                 | LVEYHQMTAPLIGYYQK            | 167 | 17 | 16 | 100.06 | b2b6b7b8°b8b9°b9b11°b11y5y6y10y11*y11y15y17              | 2054.03 | 68.805  | 57272  | 3 | 685.35  | -7.25  |
| P0A1V4 KAD_SALTY Adenylate kinase                         | 3  |                 | YGIPQISTGDMLR                | 23  | 13 | 10 | 64.63  | b2y3y5y7°y7y8°y8y10°y10y13                               | 1450.73 | 72.353  | 54265  | 2 | 725.87  | -1.51  |
| P0A1V4 KAD_SALTY Adenylate kinase                         | 4  |                 | IILLGAPGAGK                  | 2   | 11 | 8  | 54.34  | b2b3y2y5y7y8y9y11                                        | 1009.63 | 60.883  | 35113  | 2 | 505.32  | -8.89  |
| P0A1V4 KAD_SALTY Adenylate kinase                         | 5  |                 | GTQAQFIMEK                   | 13  | 10 | 5  | 41.22  | b7y3y4y7y10                                              | 1152.57 | 48.328  | 34014  | 2 | 576.79  | -4.34  |
| P0A1V4 KAD_SALTY Adenylate kinase                         | 6  |                 | FNPPK                        | 136 | 5  | 2  | 27.05  | b3y4                                                     | 602.32  | 55.565  | 44996  | 1 | 602.32  | -10.23 |
| P0A1V4 KAD_SALTY Adenylate kinase                         | 7  |                 | NGFLLDGFPR                   | 78  | 10 | 3  | 29.46  | b3y4y5                                                   | 1135.57 | 69.838  | 8848   | 2 | 568.29  | -13.33 |
| P0A1V4 KAD_SALTY Adenylate kinase                         | 8  |                 | AAVKSGSELGK                  | 36  | 11 | 4  | 28.07  | b6°b6y6y7                                                | 1046.58 | 48.729  | 21416  | 2 | 523.80  | -1.28  |
| P0A1V4 KAD_SALTY Adenylate kinase                         | 9  |                 | IILLGAPGAGKGTQAQFIMEK        | 2   | 21 | 5  | 22.49  | b3y4y9°y9y16                                             | 2143.18 | 72.298  | 17787  | 3 | 715.06  | -8.66  |
| P0A1V4 KAD_SALTY Adenylate kinase                         | 10 |                 | DIMDAGKLVTDDELVIALVK         | 50  | 19 | 5  | 43.2   | b8b11y4y5y6                                              | 2043.13 | 115.796 | 10980  | 3 | 681.71  | -7.23  |
| P0A1V4 KAD_SALTY Adenylate kinase                         | 11 |                 | VEGKDDVTGEDLTTR              | 141 | 15 | 6  | 38.36  | b3b7y5y7y8°y8                                            | 1634.79 | 82.504  | 1792   | 3 | 545.60  | 1.34   |
| P0A1V4 KAD_SALTY Adenylate kinase                         | 12 | Oxidation+M(11) | YGIPQISTGDMLR                | 23  | 13 | 3  | 21.35  | b3b6y4                                                   | 1466.75 | 61.750  | 7413   | 3 | 489.59  | 11.73  |
| P0A9Y9 CC_SALTY Cold shock-like protein cC                | 1  |                 | GFGFITPADGSK                 | 15  | 12 | 22 | 154.18 | b2b3b4b6°b6b11b12y3°y3y4y5°y5y6°y6y7°y7y8°y8y9y10°y10y12 | 1196.59 | 63.923  | 412056 | 2 | 598.80  | -7.65  |
| P0A9Y9 CC_SALTY Cold shock-like protein cC                | 2  |                 | GFGFITPADGSKDVFVHFSAIQGN GFK | 15  | 27 | 6  | 27.77  | b4b9b10b24y1y27                                          | 2843.38 | 112.932 | 6925   | 3 | 948.47  | -10.65 |
| P0A9Y9 CC_SALTY Cold shock-like protein cC                | 3  |                 | DVVFHFSAIQGNNGFK             | 27  | 15 | 3  | 18.79  | b6y8y13                                                  | 1665.84 | 56.542  | 4341   | 3 | 555.95  | -1.25  |
| P0A9Y9 CC_SALTY Cold shock-like protein cC                | 4  |                 | WFNESK                       | 9   | 6  | 5  | 57.5   | b3b4y3°y3y5                                              | 810.38  | 39.830  | 38148  | 1 | 810.38  | 1.43   |
| P0A9Y9 CC_SALTY Cold shock-like protein cC                | 5  |                 | GQVK                         | 5   | 4  | 1  | 13.15  | b3                                                       | 431.26  | 73.931  | 4549   | 1 | 431.26  | -9.91  |
| P0A9Y9 CC_SALTY Cold shock-like protein cC                | 6  |                 | TLAEGQNVEFEIQDGQK            | 42  | 17 | 4  | 23.9   | b4°b4b5y10                                               | 1905.95 | 72.378  | 2621   | 2 | 953.48  | 17.23  |
| P0A9Y9 CC_SALTY Cold shock-like protein cC                | 7  |                 | TLAEGQNVEFEIQDGQKGPAAVN VTAI | 42  | 27 | 3  | 35.87  | b6b7b8                                                   | 2799.41 | 84.388  | 1815   | 4 | 700.61  | -0.70  |
| P0A9Y9 CC_SALTY Cold shock-like protein cC                | 8  |                 | VFVHFSAIQGNNGFK              | 28  | 14 | 1  | 7.3    | b4                                                       | 1550.81 | 56.587  | 3223   | 2 | 775.91  | 0.63   |
| Q7CQV9 DPS_SALTY DNA protection during starvation protein | 1  |                 | ASNLLYTR                     | 10  | 8  | 5  | 55.24  | y3y4y5y6y8                                               | 937.51  | 43.742  | 38740  | 2 | 469.26  | -5.14  |
| Q7CQV9 DPS_SALTY DNA protection during starvation protein | 2  |                 | AIGEAKDEDTADIFTAASR          | 134 | 19 | 10 | 76.58  | b4b8b12y3y5y6y8y9°y9y10                                  | 1980.94 | 58.104  | 28315  | 3 | 660.98  | -5.61  |
| Q7CQV9 DPS_SALTY DNA protection during starvation protein | 3  |                 | AVQLGGVALGTTQVINSK           | 83  | 18 | 8  | 38.18  | b15y3°y3y9°y9y11y13y18                                   | 1756.00 | 67.217  | 22624  | 2 | 878.50  | 1.60   |
| Q7CQV9 DPS_SALTY DNA protection during starvation protein | 4  |                 | SYPLDIHNVQDHLK               | 105 | 14 | 9  | 40.33  | b2°b2b5b8°b8b9°b9y10y12                                  | 1678.84 | 57.054  | 20736  | 3 | 560.29  | -6.91  |
| Q7CQV9 DPS_SALTY DNA protection during starvation protein | 5  |                 | GANFIADVHEMLDGFR             | 55  | 15 | 4  | 24.81  | b5y10y11y15                                              | 1676.81 | 65.252  | 13341  | 2 | 838.91  | -6.04  |
| Q7CQV9 DPS_SALTY DNA protection during starvation protein | 6  |                 | SYPLDIHNVQDHLKELADR          | 105 | 19 | 4  | 15.48  | b7b10°b10y5                                              | 2263.16 | 71.565  | 2278   | 2 | 1132.08 | 4.75   |
| Q7CQV9 DPS_SALTY DNA protection during starvation protein | 7  |                 | TALTDHLDTMAER                | 70  | 13 | 10 | 103.97 | b3b5°b5b11y3y4y5y7y8y11                                  | 1473.67 | 51.888  | 59932  | 3 | 491.90  | -18.39 |
| Q7CQV9 DPS_SALTY DNA protection during starvation protein | 8  |                 | AIGEAK                       | 134 | 6  | 2  | 27.43  | b4y4                                                     | 588.33  | 31.570  | 19789  | 1 | 588.33  | -9.96  |

|                                                            |    |                       |                                     |     |    |    |        |                                                            |         |         |       |   |         |        |
|------------------------------------------------------------|----|-----------------------|-------------------------------------|-----|----|----|--------|------------------------------------------------------------|---------|---------|-------|---|---------|--------|
| [Q7CQV9]DPS_SALTY DNA protection during starvation protein | 9  |                       | DLDK                                | 153 | 4  | 2  | 13.15  | y3°y3                                                      | 490.26  | 38.323  | 6649  | 1 | 490.26  | 8.65   |
| [Q7CQV9]DPS_SALTY DNA protection during starvation protein | 10 |                       | QVIQFIDLSLITK                       | 35  | 13 | 5  | 35.45  | b3*b3b8y10y11                                              | 1517.91 | 34.802  | 2038  | 3 | 506.64  | 7.88   |
| [Q7CQV9]DPS_SALTY DNA protection during starvation protein | 11 |                       | QAHWNMR                             | 48  | 7  | 4  | 41.34  | b5y3*y3y5                                                  | 942.45  | 109.515 | 1749  | 1 | 942.45  | 10.56  |
| [P66541]RS2_SALTY 30S ribosomal protein S2                 | 1  |                       | TVPMFNEALAE LNK                     | 45  | 14 | 9  | 43.71  | b8y1y3y9*y9y10y12y14*y14                                   | 1576.81 | 84.307  | 76364 | 2 | 788.91  | 2.40   |
| [P66541]RS2_SALTY 30S ribosomal protein S2                 | 2  |                       | EANNLGIPVFAIVDTSNDPDGVDF VIPGNDDAIR | 174 | 34 | 17 | 91.22  | b5°b5*b5b6b7°b7*b7y3y4y7y8*y8y11y13y14y16y34               | 3569.76 | 104.447 | 28010 | 3 | 1190.59 | 6.02   |
| [P66541]RS2_SALTY 30S ribosomal protein S2                 | 3  | Carbamidomethyl+C(13) | AASEAVKEAANS CDQFFVNHR              | 74  | 21 | 6  | 14.36  | b2b3°b3b6y3y21                                             | 2351.08 | 53.960  | 9844  | 3 | 784.37  | 0.62   |
| [P66541]RS2_SALTY 30S ribosomal protein S2                 | 4  |                       | LENSLGGIK                           | 143 | 9  | 8  | 46.08  | b2b6b7y2y3y7*y7y9                                          | 930.52  | 37.810  | 7065  | 2 | 465.76  | -6.17  |
| [P66541]RS2_SALTY 30S ribosomal protein S2                 | 5  |                       | DMGGLPDALFVIDADHEHIAIK              | 152 | 22 | 5  | 13.9   | b6b12°b12y8y22                                             | 2377.19 | 83.483  | 2958  | 2 | 1189.10 | 1.95   |
| [P66541]RS2_SALTY 30S ribosomal protein S2                 | 6  |                       | YWNPK                               | 21  | 5  | 1  | 13.53  | y4                                                         | 707.34  | 46.526  | 12177 | 1 | 707.34  | -9.23  |
| [P66541]RS2_SALTY 30S ribosomal protein S2                 | 7  | Carbamidomethyl+C(6)  | EAANS CDQFFVNHRWLG GMLTNWK          | 81  | 24 | 4  | 22.41  | b5y7°y7y8                                                  | 2881.36 | 93.600  | 5637  | 3 | 961.12  | 10.00  |
| [P66541]RS2_SALTY 30S ribosomal protein S2                 | 8  |                       | DLETQSQDGTFEKLTK                    | 115 | 16 | 4  | 17.79  | b11b13°b13y14                                              | 1839.92 | 136.571 | 1501  | 2 | 920.47  | 14.46  |
| [P66541]RS2_SALTY 30S ribosomal protein S2                 | 9  | Oxidation+M(6)        | MATVSMR DMLK                        | 0   | 11 | 5  | 42.57  | b4b7b10°b10y7                                              | 1298.62 | 66.744  | 15303 | 2 | 649.81  | -8.55  |
| [P0A2C5]RBSB_SALTY D-ribose-binding periplasmic protein    | 1  |                       | ILLINPTDSDAVGNAVK                   | 84  | 17 | 20 | 142.39 | b2b3b4b5b10b11b13y2y7y10y11y12*y12y13°y13*y13y14*y14y15y17 | 1739.96 | 70.608  | 97748 | 2 | 870.48  | 1.40   |
| [P0A2C5]RBSB_SALTY D-ribose-binding periplasmic protein    | 2  |                       | LAATIAQLPDQIGAK                     | 253 | 15 | 10 | 87.67  | y1y2y3y4y5y7y8y10y11y15                                    | 1509.86 | 66.163  | 81691 | 2 | 755.43  | -4.29  |
| [P0A2C5]RBSB_SALTY D-ribose-binding periplasmic protein    | 3  |                       | IPVITLDR                            | 107 | 8  | 7  | 64     | b3y1y4y5y6y7y8                                             | 926.55  | 61.613  | 53435 | 2 | 463.78  | -13.90 |
| [P0A2C5]RBSB_SALTY D-ribose-binding periplasmic protein    | 4  |                       | GLNVMQNLLTAHPDVQAVFAQN DEMALGALR    | 193 | 31 | 13 | 79.76  | b4y2y3y4y5y6y9y10y11*y11y13°y13y31                         | 3336.71 | 102.574 | 41744 | 3 | 1112.91 | 7.61   |
| [P0A2C5]RBSB_SALTY D-ribose-binding periplasmic protein    | 5  |                       | FNVLASQPADFDR                       | 178 | 13 | 7  | 48.61  | b7y3°y3y8y9y10y13                                          | 1479.72 | 66.081  | 32835 | 2 | 740.37  | 0.74   |
| [P0A2C5]RBSB_SALTY D-ribose-binding periplasmic protein    | 6  |                       | VIELQGIAGTSAAR                      | 150 | 14 | 6  | 43.71  | b1b4y6y9y10y12                                             | 1385.78 | 58.892  | 30107 | 2 | 693.39  | 0.26   |
| [P0A2C5]RBSB_SALTY D-ribose-binding periplasmic protein    | 7  |                       | ADVMVVGFDGTPDGEK                    | 231 | 16 | 5  | 29.27  | b2b8y5y10y11                                               | 1636.76 | 63.561  | 27809 | 2 | 818.88  | 3.95   |
| [P0A2C5]RBSB_SALTY D-ribose-binding periplasmic protein    | 8  |                       | ELANVQDLTVR                         | 70  | 11 | 5  | 25.06  | b10y2y3y6y11                                               | 1257.68 | 57.413  | 25350 | 2 | 629.34  | -1.07  |
| [P0A2C5]RBSB_SALTY D-ribose-binding periplasmic protein    | 9  |                       | YPVDLK                              | 285 | 6  | 2  | 27.43  | y4y5                                                       | 734.40  | 42.061  | 13562 | 2 | 367.70  | -14.71 |
| [P0A2C5]RBSB_SALTY D-ribose-binding periplasmic protein    | 10 |                       | LVIK                                | 291 | 4  | 1  | 13.15  | y3                                                         | 472.35  | 55.804  | 10603 | 1 | 472.35  | -6.01  |
| [P0A2C5]RBSB_SALTY D-ribose-binding periplasmic protein    | 11 |                       | QATKGDVVSHIASDNVLGGK                | 115 | 20 | 15 | 92.84  | b6°b6*b6b9°b9*b9b14°b14y7y8y9y10y11*y11y12                 | 1996.03 | 50.906  | 42618 | 3 | 666.01  | -7.83  |
| [P0A2C5]RBSB_SALTY D-ribose-binding periplasmic protein    | 12 |                       | EADKLGYNLVVLDSQNNPAK                | 50  | 20 | 3  | 14.89  | b10y3y5                                                    | 2188.12 | 65.868  | 19238 | 3 | 730.04  | -2.45  |
| [P0A2C5]RBSB_SALTY D-ribose-binding periplasmic protein    | 13 |                       | ERGEFQQAVAAHK                       | 164 | 14 | 3  | 19.96  | b6b13y9                                                    | 1527.74 | 73.351  | 10916 | 2 | 764.38  | -14.06 |
| [P0A2C5]RBSB_SALTY D-ribose-binding periplasmic protein    | 14 |                       | GEGFQQAVAAHKFNVLASQPADFDR           | 166 | 25 | 4  | 12.79  | b7y3°y3y11                                                 | 2703.36 | 84.479  | 4923  | 3 | 901.79  | 11.47  |
| [P0A2C5]RBSB_SALTY D-ribose-binding periplasmic protein    | 15 |                       | FNVLASQPADFDR TK                    | 178 | 15 | 5  | 38.36  | b5b9b12y6y9                                                | 1708.86 | 83.474  | 4139  | 2 | 854.93  | -6.00  |

|                                                        |    |                      |                                     |     |    |    |        |                                                                     |         |         |        |   |         |        |
|--------------------------------------------------------|----|----------------------|-------------------------------------|-----|----|----|--------|---------------------------------------------------------------------|---------|---------|--------|---|---------|--------|
| P0A2C5 RBSB_SALTY D-ribose-binding periplasmic protein | 16 | Oxidation+M(5)       | GLNVMQNLLTAHPDVQAVFAQN<br>DEMALGALR | 193 | 31 | 4  | 25.17  | b6b14y9y10                                                          | 3352.64 | 98.152  | 2077   | 5 | 671.33  | -11.29 |
| P0A2F6 SSB_SALTY Single-stranded DNA-binding protein   | 1  |                      | VILVGNLGDPEVR                       | 8   | 14 | 13 | 91.79  | b2b3b4y2y4y8y9y10°y10y11°y11y12y14                                  | 1508.84 | 65.622  | 28660  | 2 | 754.92  | -0.73  |
| P0A2F6 SSB_SALTY Single-stranded DNA-binding protein   | 2  |                      | YTTEINVQIGGVMQMLGGR                 | 97  | 20 | 6  | 21.68  | y5y6*y10y13*y13y20                                                  | 2164.10 | 96.402  | 20318  | 2 | 1082.56 | 7.33   |
| P0A2F6 SSB_SALTY Single-stranded DNA-binding protein   | 3  |                      | YMPSGGAVANLTLATSESWRDK              | 22  | 22 | 7  | 31.36  | b11°b11y3y4y8°y8y11                                                 | 2354.12 | 113.543 | 4042   | 3 | 785.38  | -12.13 |
| P0A2F6 SSB_SALTY Single-stranded DNA-binding protein   | 4  |                      | YMPSGGAVANLTLATSESWR                | 22  | 20 | 5  | 23.02  | b13°b13b14y12°y12                                                   | 2111.06 | 84.398  | 13234  | 4 | 528.52  | 15.50  |
| P0A7W4 RS5_SALTY 30S ribosomal protein S5              | 1  |                      | VFMQPASEGTGIIAGGAMR                 | 93  | 19 | 23 | 181.68 | b2b3b4b11b12°b12b13b16°b16y4y5y6y7y11y12y13°y13y14y15°y15y16*y16y19 | 1892.94 | 67.761  | 107857 | 2 | 946.97  | 2.45   |
| P0A7W4 RS5_SALTY 30S ribosomal protein S5              | 2  |                      | AYGSTNPINVVR                        | 126 | 12 | 16 | 130.92 | b2b3b4b5y1y2y3y4*y4y5y6y7y8y10*y10y12                               | 1290.68 | 50.852  | 102962 | 2 | 645.84  | -1.89  |
| P0A7W4 RS5_SALTY 30S ribosomal protein S5              | 3  |                      | ATIDGLENMNSPEMVA AK                 | 138 | 18 | 10 | 77.44  | b4b15b18y3y4y11y12y14y15y18                                         | 1890.91 | 63.144  | 69184  | 2 | 945.96  | 6.33   |
| P0A7W4 RS5_SALTY 30S ribosomal protein S5              | 4  |                      | ATIDGLENMNSPEMVA AKR                | 138 | 19 | 10 | 104.47 | b2y3y4y5y8y10y12y13y15y16                                           | 2046.98 | 58.890  | 44217  | 3 | 683.00  | -8.35  |
| P0A7W4 RS5_SALTY 30S ribosomal protein S5              | 5  |                      | IFSFTALT VVG DGNR                   | 29  | 16 | 5  | 39.12  | b3y4y6y7y14                                                         | 1653.86 | 86.300  | 39204  | 2 | 827.43  | -0.52  |
| P0A7W4 RS5_SALTY 30S ribosomal protein S5              | 6  |                      | NMINVALNNGTLQHPVK                   | 69  | 17 | 8  | 37.36  | b2b3b9°b9b10b16y12y17                                               | 1862.98 | 62.316  | 16716  | 3 | 621.66  | -7.27  |
| P0A7W4 RS5_SALTY 30S ribosomal protein S5              | 7  |                      | SVEEILGK                            | 159 | 8  | 4  | 55.24  | b4b7y3y6                                                            | 874.48  | 49.804  | 71048  | 2 | 437.74  | -14.94 |
| P0A7W4 RS5_SALTY 30S ribosomal protein S5              | 8  |                      | LIAVNR                              | 14  | 6  | 2  | 27.43  | y4y5                                                                | 685.43  | 32.254  | 9254   | 1 | 685.43  | -4.99  |
| P0A7W4 RS5_SALTY 30S ribosomal protein S5              | 9  |                      | AHIEK                               | 1   | 5  | 3  | 40.58  | b3b4y4                                                              | 597.33  | 22.812  | 2966   | 1 | 597.33  | -11.75 |
| P0A7W4 RS5_SALTY 30S ribosomal protein S5              | 10 |                      | RNMINVALNNGTLQHPVK                  | 68  | 18 | 7  | 55.73  | b3b4b5b11y10*y10y11                                                 | 2019.08 | 55.707  | 29900  | 3 | 673.70  | -6.47  |
| P0A7W4 RS5_SALTY 30S ribosomal protein S5              | 11 |                      | GVHTGSRVFMQPASEGTGIIAGGA<br>MR      | 86  | 26 | 5  | 12.49  | b7°b7y13°y13y15                                                     | 2587.33 | 100.727 | 11752  | 2 | 1294.17 | 14.81  |
| P0A7W4 RS5_SALTY 30S ribosomal protein S5              | 12 |                      | NMINVALNNGTLQHPVKGVHTG<br>SR        | 69  | 24 | 4  | 26.88  | b10b12y10y11                                                        | 2557.31 | 55.851  | 5985   | 4 | 640.08  | -11.46 |
| P0A7W4 RS5_SALTY 30S ribosomal protein S5              | 13 |                      | IFSFTALT VVG DGNR VGF GYGK          | 29  | 23 | 3  | 22.51  | b5y5y6                                                              | 2362.25 | 127.715 | 3232   | 2 | 1181.63 | 12.61  |
| P0A7W4 RS5_SALTY 30S ribosomal protein S5              | 14 | Phosphoryl STY(7)    | VFMQPASEGTGIIAGGAMR                 | 93  | 19 | 4  | 23.26  | b5b6°b6y6                                                           | 1972.92 | 102.439 | 2129   | 3 | 658.31  | 12.87  |
| P0A7W4 RS5_SALTY 30S ribosomal protein S5              | 15 | Oxidation+M(18)      | VFMQPASEGTGIIAGGAMR                 | 93  | 19 | 3  | 15.48  | b6b12y15                                                            | 1908.91 | 75.184  | 3269   | 4 | 477.98  | -10.74 |
| P0A7W4 RS5_SALTY 30S ribosomal protein S5              | 16 | Oxidation+M()        | ATIDGLENMNSPEMVA AK                 | 138 | 18 | 4  | 22.62  | b5b8y8y10                                                           | 1906.87 | 68.807  | 1605   | 3 | 636.30  | -7.43  |
| P0A7W4 RS5_SALTY 30S ribosomal protein S5              | 17 |                      | MINVALNNGTLQHPVK                    | 70  | 16 | 1  | 7.26   | b11                                                                 | 1748.93 | 62.351  | 2097   | 3 | 583.65  | -12.70 |
| P0A7W4 RS5_SALTY 30S ribosomal protein S5              | 18 |                      | AYGSTNPINVVR                        | 126 | 12 | 0  | 2.64   |                                                                     | 1273.65 | 50.803  | 1502   | 2 | 637.33  | 1.73   |
| P58661 AAT_SALTY Aartate aminotransferase              | 1  |                      | MFENITAAPADPILGLADLFR               | 0   | 21 | 11 | 80.15  | b4b5b6b11°b11b17y3y5y7y13y14                                        | 2275.20 | 120.465 | 15822  | 2 | 1138.10 | 8.48   |
| P58661 AAT_SALTY Aartate aminotransferase              | 2  |                      | TAQTPGGTGALR                        | 96  | 12 | 5  | 26.99  | b10y1y8y9y12                                                        | 1129.59 | 29.359  | 11353  | 2 | 565.30  | -3.67  |
| P58661 AAT_SALTY Aartate aminotransferase              | 3  |                      | GWLPLFDFA YQG FAR                   | 204 | 15 | 6  | 41.2   | b3y4y5y8y12y15                                                      | 1787.89 | 115.427 | 8952   | 2 | 894.45  | -0.68  |
| P58661 AAT_SALTY Aartate aminotransferase              | 4  |                      | AIWEQELTDMR                         | 304 | 11 | 5  | 28.07  | b2b7b8y3y11                                                         | 1391.66 | 82.811  | 6913   | 2 | 696.33  | -4.03  |
| P58661 AAT_SALTY Aartate aminotransferase              | 5  | Carbamidomethyl+C(4) | VGACTLVAADAETVDR                    | 254 | 16 | 5  | 25.19  | b8b11y4y8°y8                                                        | 1647.82 | 78.209  | 3155   | 2 | 824.41  | 11.26  |

|                                                                          |    |                       |                                   |     |    |    |       |                             |         |         |       |   |         |        |
|--------------------------------------------------------------------------|----|-----------------------|-----------------------------------|-----|----|----|-------|-----------------------------|---------|---------|-------|---|---------|--------|
| P58661 AAT_SALTY Aartate aminotransferase                                | 6  | Carbamidomethyl+C(15) | VNVAGMTPDNMAPLCEAIVAVL            | 374 | 22 | 3  | 20.41 | b3b7b9                      | 2285.15 | 118.212 | 2861  | 2 | 1143.08 | 9.08   |
| P58661 AAT_SALTY Aartate aminotransferase                                | 7  |                       | QNGMFSFSGLTK                      | 343 | 12 | 3  | 26.99 | b4b5y11                     | 1316.62 | 54.979  | 12646 | 2 | 658.81  | -9.92  |
| P58661 AAT_SALTY Aartate aminotransferase                                | 8  |                       | NYLGIDGIPFAR                      | 63  | 13 | 11 | 81.69 | b3b4*b4b6°b6b8°b8y6y8y10y11 | 1464.75 | 80.542  | 12554 | 2 | 732.88  | -0.92  |
| P58661 AAT_SALTY Aartate aminotransferase                                | 9  |                       | VWVSNPSWPNHK                      | 122 | 12 | 4  | 26.99 | b8y4*y4y5                   | 1450.70 | 53.270  | 11686 | 3 | 484.24  | -17.25 |
| P58661 AAT_SALTY Aartate aminotransferase                                | 10 |                       | NFGLYNER                          | 246 | 8  | 3  | 33.93 | b3b4y7                      | 1012.50 | 28.974  | 4626  | 2 | 506.75  | 11.76  |
| P58661 AAT_SALTY Aartate aminotransferase                                | 11 |                       | ANYSNPPAHGASIVATILSNDALR          | 280 | 24 | 3  | 22.41 | b13b14y21                   | 2452.30 | 84.990  | 2812  | 2 | 1226.66 | 18.52  |
| P58661 AAT_SALTY Aartate aminotransferase                                | 12 |                       | ELIVASSYSKNFGLYNER                | 236 | 18 | 3  | 25.07 | y7y10y11                    | 2090.05 | 85.530  | 23280 | 3 | 697.36  | -0.70  |
| P58661 AAT_SALTY Aartate aminotransferase                                | 13 | Carbamidomethyl+C(12) | NFGLYNERVGACTLVAADAETVDR          | 246 | 24 | 5  | 20.16 | b6b8b10°b10y10              | 2641.29 | 79.983  | 12424 | 3 | 881.10  | 10.26  |
| P58661 AAT_SALTY Aartate aminotransferase                                | 14 | Carbamidomethyl+C(1)  | CTQELLFKGKSALINDK                 | 76  | 17 | 6  | 35.22 | b8°b8b9b12y4y11             | 1893.95 | 69.662  | 2086  | 4 | 474.24  | -11.15 |
| P58661 AAT_SALTY Aartate aminotransferase                                | 15 |                       | GWLPLFDFAyQGFARGLEEDAEGLR         | 204 | 25 | 3  | 12.79 | b3y4y9                      | 2857.38 | 92.959  | 2025  | 2 | 1429.19 | -5.98  |
| P58661 AAT_SALTY Aartate aminotransferase                                | 16 | Carbamidomethyl+C(4)  | VGACTLVAADAETVDRAFSQMK            | 254 | 22 | 8  | 47.88 | b6°b6b10b13b15y9y11y12      | 2340.14 | 78.095  | 1795  | 3 | 780.72  | 3.23   |
| Q7CPK0 UGPB_SALTY sn-glycerol-3-phohate-binding periplasmic protein ugpB | 1  |                       | TGYLPITTAAYELTR                   | 343 | 15 | 7  | 49.97 | b3b4b11y6y9y11y15           | 1669.89 | 84.701  | 59385 | 2 | 835.45  | 3.80   |
| Q7CPK0 UGPB_SALTY sn-glycerol-3-phohate-binding periplasmic protein ugpB | 2  |                       | NNGFDGTDAVLEFNKPEQVK              | 212 | 20 | 6  | 21.68 | b1*b1y10y16y18y20           | 2222.05 | 65.195  | 56286 | 3 | 741.35  | -11.76 |
| Q7CPK0 UGPB_SALTY sn-glycerol-3-phohate-binding periplasmic protein ugpB | 3  |                       | AIKPVYEVFKDAGINFDESQFVPTVAGYYTDAK | 99  | 33 | 7  | 63.45 | b6y7y8y9°y9y10y11           | 3682.82 | 93.158  | 36335 | 4 | 921.46  | -4.44  |
| Q7CPK0 UGPB_SALTY sn-glycerol-3-phohate-binding periplasmic protein ugpB | 4  |                       | TIVDEELESVWTGKK                   | 397 | 15 | 7  | 37.67 | b2y2y3y7y8y13y15            | 1733.87 | 75.248  | 34242 | 3 | 578.63  | -12.32 |
| Q7CPK0 UGPB_SALTY sn-glycerol-3-phohate-binding periplasmic protein ugpB | 5  |                       | LGNMPQIR                          | 389 | 8  | 5  | 64    | b6y4y5y6y7                  | 928.50  | 47.448  | 28627 | 2 | 464.75  | -8.74  |
| Q7CPK0 UGPB_SALTY sn-glycerol-3-phohate-binding periplasmic protein ugpB | 6  |                       | FLDFLAKPENAAEWHQK                 | 326 | 17 | 6  | 28.3  | b3y5y6y10*y10y17            | 2044.00 | 72.763  | 28325 | 3 | 682.01  | -11.65 |
| Q7CPK0 UGPB_SALTY sn-glycerol-3-phohate-binding periplasmic protein ugpB | 7  |                       | SGHLLSQPFNSSTPVLYYNK              | 132 | 20 | 10 | 87.04 | b3b5b6b7b12y3y5y6y7y10      | 2252.12 | 67.864  | 22710 | 3 | 751.38  | -6.18  |
| Q7CPK0 UGPB_SALTY sn-glycerol-3-phohate-binding periplasmic protein ugpB | 8  |                       | GAPQNAIIGGASLWVMQGKDKETYTGVAK     | 297 | 29 | 4  | 17.76 | y10y15y18y29                | 2990.56 | 104.075 | 20010 | 4 | 748.39  | 4.98   |
| Q7CPK0 UGPB_SALTY sn-glycerol-3-phohate-binding periplasmic protein ugpB | 9  |                       | FNQANPDYK                         | 47  | 9  | 4  | 39.08 | y2y4y6y7                    | 1096.50 | 28.340  | 16125 | 2 | 548.76  | -2.34  |
| Q7CPK0 UGPB_SALTY sn-glycerol-3-phohate-binding periplasmic protein ugpB | 10 |                       | FNYGVGMMPYDADIK                   | 282 | 15 | 7  | 60.16 | b5y7y8y10y11y12y15          | 1720.78 | 74.349  | 15773 | 2 | 860.89  | 3.76   |
| Q7CPK0 UGPB_SALTY sn-glycerol-3-phohate-binding periplasmic protein ugpB | 11 | Carbamidomethyl+C(6)  | FYNGDCAMTTASSGSLANIR              | 258 | 20 | 6  | 41.57 | y10y11*y11y13y14y20         | 2135.96 | 60.912  | 12722 | 2 | 1068.48 | 6.52   |
| Q7CPK0 UGPB_SALTY sn-glycerol-3-phohate-binding periplasmic protein ugpB | 12 |                       | TIVDEELESVWTGK                    | 397 | 14 | 5  | 25.4  | b1b8y11y12y14               | 1605.81 | 82.091  | 11352 | 2 | 803.41  | 6.99   |



|                                                                          |    |                    |                           |     |    |    |       |                                |         |         |       |   |         |        |
|--------------------------------------------------------------------------|----|--------------------|---------------------------|-----|----|----|-------|--------------------------------|---------|---------|-------|---|---------|--------|
| Q7CPK0 UGPB_SALTY sn-glycerol-3-phohate-binding periplasmic protein ugpB | 13 |                    | GAPQNAIIGGASLWVMQGKDK     | 297 | 21 | 5  | 19.72 | b3b6y8y14*y14                  | 2141.10 | 92.071  | 1855  | 2 | 1071.06 | -5.93  |
| Q7CPK0 UGPB_SALTY sn-glycerol-3-phohate-binding periplasmic protein ugpB | 14 |                    | AGLDPEQPPK                | 157 | 10 | 6  | 29.46 | b5°b5b6°b6y6*y6                | 1051.56 | 57.132  | 33201 | 2 | 526.28  | 12.77  |
| Q7CPK0 UGPB_SALTY sn-glycerol-3-phohate-binding periplasmic protein ugpB | 15 |                    | EVDSLAQR                  | 39  | 8  | 6  | 36.94 | b4y5°y5*y5y7*y7                | 917.49  | 43.908  | 6213  | 2 | 459.25  | 21.29  |
| Q7CPK0 UGPB_SALTY sn-glycerol-3-phohate-binding periplasmic protein ugpB | 16 |                    | HIALLEEMNK                | 232 | 10 | 5  | 49.01 | b4y3y6y8°y8                    | 1197.61 | 57.704  | 4028  | 2 | 599.31  | -17.63 |
| Q7CPK0 UGPB_SALTY sn-glycerol-3-phohate-binding periplasmic protein ugpB | 17 |                    | IVPVYK                    | 56  | 6  | 1  | 13.9  | y4                             | 718.44  | 36.930  | 2723  | 2 | 359.72  | -13.59 |
| Q7CPK0 UGPB_SALTY sn-glycerol-3-phohate-binding periplasmic protein ugpB | 18 |                    | TWQELADYTAK               | 167 | 11 | 3  | 28.07 | b6y4y5                         | 1325.61 | 97.721  | 2189  | 2 | 663.31  | -22.10 |
| Q7CPK0 UGPB_SALTY sn-glycerol-3-phohate-binding periplasmic protein ugpB | 19 |                    | AGLDPEQPPKTWQELADYTAK     | 157 | 21 | 4  | 22.49 | b4y8y14y17                     | 2358.15 | 72.475  | 37317 | 3 | 786.72  | -4.35  |
| Q7CPK0 UGPB_SALTY sn-glycerol-3-phohate-binding periplasmic protein ugpB | 20 |                    | EQGYDKNPGADIATR           | 358 | 16 | 5  | 29.27 | b8°b8y4y5y8                    | 1797.82 | 39.965  | 24093 | 3 | 599.94  | -12.70 |
| Q7CPK0 UGPB_SALTY sn-glycerol-3-phohate-binding periplasmic protein ugpB | 21 |                    | TIVDEELESVWTGKK           | 397 | 15 | 3  | 26.87 | b6b7b14                        | 1733.88 | 93.727  | 9939  | 2 | 867.44  | -10.98 |
| Q7CPK0 UGPB_SALTY sn-glycerol-3-phohate-binding periplasmic protein ugpB | 22 |                    | GAPQNAIIGGASLWVMQGKDK     | 297 | 21 | 4  | 19.72 | b5b14y6y8                      | 2141.14 | 68.871  | 2563  | 3 | 714.39  | 11.97  |
| Q7CPK0 UGPB_SALTY sn-glycerol-3-phohate-binding periplasmic protein ugpB | 23 |                    | KAGLDPEQPPK               | 156 | 11 | 5  | 36.37 | b5b10y7y10°y10                 | 1179.63 | 42.357  | 1778  | 2 | 590.32  | -2.79  |
| Q7CPK0 UGPB_SALTY sn-glycerol-3-phohate-binding periplasmic protein ugpB | 24 | Phosphoryl STY(5)  | GDFSYYVGRK                | 243 | 9  | 4  | 31.3  | b3°b3y5y6                      | 1108.47 | 37.785  | 3247  | 1 | 1108.47 | 0.88   |
| Q7CPK0 UGPB_SALTY sn-glycerol-3-phohate-binding periplasmic protein ugpB | 25 | Phosphoryl STY(12) | GAPQNAIIGGASLWVMQGKDK     | 297 | 21 | 3  | 21.01 | b4b11b13                       | 2221.07 | 68.268  | 2150  | 4 | 556.02  | -1.87  |
| Q7CPK0 UGPB_SALTY sn-glycerol-3-phohate-binding periplasmic protein ugpB | 26 | Oxidation+M(16)    | GAPQNAIIGGASLWVMQGK       | 297 | 19 | 9  | 30.57 | b6*b6b10y3*y3y6*y6y11*y11      | 1913.96 | 81.041  | 3289  | 3 | 638.66  | -14.67 |
| Q7CPK0 UGPB_SALTY sn-glycerol-3-phohate-binding periplasmic protein ugpB | 27 | Oxidation+M(19)    | TGNAPAILQVYEVGTATMMASK    | 77  | 22 | 5  | 30.04 | b3b16y4y5y11                   | 2269.12 | 96.644  | 2933  | 2 | 1135.06 | 0.86   |
| Q7CPK0 UGPB_SALTY sn-glycerol-3-phohate-binding periplasmic protein ugpB | 28 |                    | AIKPVYEVFKDAGINFDESQ      | 99  | 20 | 0  | 10.56 |                                | 2270.15 | 93.199  | 32666 | 3 | 757.39  | 7.53   |
| P05989 ILVC_SALTY Ketol-acid reductoisomerase                            | 1  |                    | LIQFGWETITEALK            | 252 | 14 | 9  | 64.86 | b3b7b13y3y8y9y11°y11y14        | 1648.90 | 101.134 | 60594 | 2 | 824.95  | 1.85   |
| P05989 ILVC_SALTY Ketol-acid reductoisomerase                            | 2  |                    | GFGVPTLIIVHPENDPQGEGMAIAK | 167 | 25 | 12 | 60.66 | b2b3b4b7b8y1y2y6y8y14y21y25    | 2548.28 | 77.014  | 47756 | 3 | 850.10  | -1.34  |
| P05989 ILVC_SALTY Ketol-acid reductoisomerase                            | 3  |                    | AYALSEQLKEIMAPLFQK        | 284 | 18 | 12 | 88.38 | b2b3b4b6b10b13b14y5y6y10y16y18 | 2080.10 | 102.836 | 40331 | 3 | 694.04  | -6.10  |
| P05989 ILVC_SALTY Ketol-acid reductoisomerase                            | 4  |                    | DGAALGYSHGFNIVEVGEQIRK    | 123 | 22 | 10 | 44.52 | b2b3b5°b5b7b13y6y8y17y22       | 2360.18 | 72.020  | 38791 | 3 | 787.40  | -6.93  |
| P05989 ILVC_SALTY Ketol-acid reductoisomerase                            | 5  |                    | ANYFNTLNL                 | 1   | 10 | 10 | 55.72 | b2*b2b3b4y3*y3y6y7y10*y10      | 1225.63 | 67.462  | 30943 | 2 | 613.32  | -5.28  |

|                                                |    |                                                      |                                         |     |    |    |       |                                        |         |         |        |   |         |        |
|------------------------------------------------|----|------------------------------------------------------|-----------------------------------------|-----|----|----|-------|----------------------------------------|---------|---------|--------|---|---------|--------|
| [P05989]ILVC_SALTY Ketol-acid reductoisomerase | 6  |                                                      | TAFETAPQYEGK                            | 336 | 12 | 4  | 30.21 | y6y7y9y12                              | 1341.63 | 41.730  | 16796  | 2 | 671.32  | -2.55  |
| [P05989]ILVC_SALTY Ketol-acid reductoisomerase | 7  |                                                      | FMGRDEFADGASYLQGK                       | 21  | 17 | 13 | 70.95 | b3b4b6y2y5y6y8°y8y9*y9y11°y11y17       | 1891.88 | 62.262  | 14850  | 2 | 946.44  | 7.42   |
| [P05989]ILVC_SALTY Ketol-acid reductoisomerase | 8  |                                                      | LVAEGTDPAYAEK                           | 239 | 13 | 3  | 28.83 | y6y7y11                                | 1363.66 | 37.700  | 5879   | 2 | 682.34  | -7.52  |
| [P05989]ILVC_SALTY Ketol-acid reductoisomerase | 9  |                                                      | DSGLDISYALRK                            | 57  | 12 | 5  | 35.29 | b7b10b11°b11y3                         | 1337.69 | 51.865  | 2618   | 3 | 446.57  | -9.31  |
| [P05989]ILVC_SALTY Ketol-acid reductoisomerase | 10 |                                                      | DSGLDISYALR                             | 57  | 11 | 6  | 42.57 | b5b8°b8b10°b10y4                       | 1209.61 | 53.233  | 2387   | 2 | 605.31  | 1.72   |
| [P05989]ILVC_SALTY Ketol-acid reductoisomerase | 11 |                                                      | QGGITLMMDR                              | 266 | 10 | 4  | 27.7  | b5y3°y3y7                              | 1121.57 | 63.346  | 1896   | 2 | 561.29  | 19.48  |
| [P05989]ILVC_SALTY Ketol-acid reductoisomerase | 12 |                                                      | DGAALGYSHGFNIVEVGEQIR                   | 123 | 21 | 4  | 31.6  | b3b8b13b15                             | 2232.11 | 88.095  | 1669   | 3 | 744.71  | 0.98   |
| [P05989]ILVC_SALTY Ketol-acid reductoisomerase | 13 |                                                      | AGVLESSFVAEVK                           | 202 | 13 | 4  | 33.32 | b6b7b10y9                              | 1335.69 | 49.583  | 1611   | 2 | 668.35  | -17.36 |
| [P05989]ILVC_SALTY Ketol-acid reductoisomerase | 14 |                                                      | VGTYEELIPQADLVVNLTDPKQHS DVVR           | 88  | 28 | 8  | 27.36 | b4°b4b7°b7b16y6y10y14                  | 3135.61 | 81.457  | 58190  | 4 | 784.66  | -7.63  |
| [P05989]ILVC_SALTY Ketol-acid reductoisomerase | 15 |                                                      | DGAALGYSHGFNIVEVGEQIRK                  | 123 | 22 | 3  | 20.41 | b3b5b21                                | 2360.18 | 93.684  | 36055  | 3 | 787.40  | -6.10  |
| [P05989]ILVC_SALTY Ketol-acid reductoisomerase | 16 | Carbamidomethyl+C(11)<br>;Carbamidomethyl+C(21)<br>) | SDLMGEQTILCGMLQAGSLLCFD KLVAEGTDPAYAEK  | 215 | 37 | 11 | 89.79 | b3b4b5b12y6°y6y7y8y9y10y22             | 4031.95 | 117.784 | 14366  | 3 | 1344.66 | 10.17  |
| [P05989]ILVC_SALTY Ketol-acid reductoisomerase | 17 |                                                      | ANYFNTLNLRQQLAQLGK                      | 1   | 18 | 3  | 16.15 | b4b9y3                                 | 2092.14 | 89.641  | 10102  | 2 | 1046.57 | 3.03   |
| [P05989]ILVC_SALTY Ketol-acid reductoisomerase | 18 |                                                      | LIQFGWETITEALKQGGITLMMDR                | 252 | 24 | 5  | 43.45 | y4y5y6y9y13                            | 2751.41 | 118.596 | 4908   | 3 | 917.81  | -3.19  |
| [P05989]ILVC_SALTY Ketol-acid reductoisomerase | 19 |                                                      | AGVELAFETMVDSGIIEESAYYES LHELPLIANTIARK | 366 | 38 | 6  | 14.85 | b3b11°b11b15°b15y21                    | 4180.10 | 114.094 | 3550   | 4 | 1045.78 | -4.21  |
| [P05989]ILVC_SALTY Ketol-acid reductoisomerase | 20 | Carbamidomethyl+C(7)                                 | KVVIVGCGAQLNQLGNMR                      | 38  | 19 | 3  | 15.48 | b5y10y12                               | 2014.07 | 58.532  | 2364   | 2 | 1007.54 | 2.67   |
| [P05989]ILVC_SALTY Ketol-acid reductoisomerase | 21 |                                                      | EETGKTAFETAPQYEGK                       | 331 | 17 | 3  | 25.57 | y4y7y8                                 | 1885.89 | 40.778  | 1988   | 2 | 943.45  | 4.47   |
| [P05989]ILVC_SALTY Ketol-acid reductoisomerase | 22 |                                                      | QGGITLMMDRLSNPAK                        | 266 | 16 | 4  | 17.79 | b5°b5b8y9                              | 1731.88 | 35.911  | 1564   | 2 | 866.44  | -3.38  |
| [P05989]ILVC_SALTY Ketol-acid reductoisomerase | 23 | Phosphoryl STY(6)                                    | ANYFNTLNLR                              | 1   | 10 | 5  | 42.19 | b4b5y5_H3PO4 y5°y5y7                   | 1305.59 | 38.299  | 23521  | 3 | 435.87  | 2.71   |
| [P05989]ILVC_SALTY Ketol-acid reductoisomerase | 24 | Phosphoryl STY(8)                                    | LIQFGWETITEALK                          | 252 | 14 | 3  | 19.96 | b9_HPO3 b9y5y11                        | 1728.84 | 64.908  | 5664   | 2 | 864.92  | -8.54  |
| [P05989]ILVC_SALTY Ketol-acid reductoisomerase | 25 | Oxidation+M(6)                                       | SVQPLMKDGAALGYSHGFNIVEVGEQIR            | 116 | 28 | 8  | 37.83 | b3b7°b7y4y5y12y21y24                   | 3031.56 | 132.850 | 109807 | 3 | 1011.19 | 10.95  |
| [P05989]ILVC_SALTY Ketol-acid reductoisomerase | 26 | Oxidation+M(6)                                       | DITVVMVAPK                              | 145 | 10 | 4  | 29.46 | b3°b3b4y3                              | 1088.60 | 28.665  | 14058  | 2 | 544.80  | -3.03  |
| [P05989]ILVC_SALTY Ketol-acid reductoisomerase | 27 |                                                      | LVAEGTDPAY                              | 239 | 10 | 0  | 3.02  |                                        | 1035.51 | 37.667  | 5566   | 2 | 518.26  | 6.25   |
| [Q7CPH8]SECB_SALTY Protein-export protein secB | 1  | Carbamidomethyl+C(2)                                 | ECITSLVSR                               | 111 | 9  | 5  | 39.08 | y1y5y6y7y9                             | 1064.53 | 53.644  | 44422  | 2 | 532.77  | -7.68  |
| [Q7CPH8]SECB_SALTY Protein-export protein secB | 2  |                                                      | LDLDTASSQLADDVYEVVLR                    | 41  | 20 | 15 | 89.34 | b2b4b6b14y2y3y4y5y6y9y10°y10y14y20*y20 | 2222.14 | 109.008 | 33479  | 2 | 1111.57 | 9.12   |
| [Q7CPH8]SECB_SALTY Protein-export protein secB | 3  |                                                      | DVSFEAPNAPHVFQKDWQPEVK                  | 19  | 22 | 6  | 20.41 | b2y2y4y7y16y22                         | 2568.21 | 67.998  | 18830  | 4 | 642.81  | -14.54 |
| [Q7CPH8]SECB_SALTY Protein-export protein secB | 4  |                                                      | GTFPQLNLAPVNFDAFMNYLQQ QAGEGTEEHQDA     | 120 | 35 | 11 | 41    | b4°b4b7°b7b8°b8b9b21y2y8y10            | 3893.83 | 116.102 | 16211  | 3 | 1298.62 | 6.77   |
| [Q7CPH8]SECB_SALTY Protein-export protein secB | 5  |                                                      | DVSFEAPNAPHVFQK                         | 19  | 15 | 5  | 30.4  | b3°b3y6y9y11                           | 1685.80 | 60.270  | 28372  | 3 | 562.61  | -16.44 |
| [Q7CPH8]SECB_SALTY Protein-export protein secB | 6  |                                                      | MSEQNNTMAFQIQR                          | 0   | 15 | 6  | 30.4  | b3y6y7*y7y9*y9                         | 1826.78 | 71.568  | 2748   | 4 | 457.45  | -18.98 |

|                                                            |    |                       |                                |     |    |    |       |                                                 |         |         |        |   |         |        |
|------------------------------------------------------------|----|-----------------------|--------------------------------|-----|----|----|-------|-------------------------------------------------|---------|---------|--------|---|---------|--------|
| [P66643]RS9_SALTY 30S ribosomal protein S9                 | 1  |                       | SLEQYFGR                       | 33  | 8  | 4  | 50.47 | b4y4y5y6                                        | 999.48  | 59.808  | 60148  | 2 | 500.24  | -9.53  |
| [P66643]RS9_SALTY 30S ribosomal protein S9                 | 2  |                       | GGGSGQAGAIR                    | 68  | 12 | 7  | 55.81 | b5y5y6y7*y7y8y12                                | 1043.55 | 33.078  | 25184  | 2 | 522.28  | -6.67  |
| [P66643]RS9_SALTY 30S ribosomal protein S9                 | 3  |                       | AENQYYGTGR                     | 1   | 10 | 3  | 29.46 | b4y4y5                                          | 1158.52 | 25.912  | 1845   | 2 | 579.76  | -1.48  |
| [P65215]KDSA_SALTY 2-dehydro-3-deoxyphohooctonate aldolase | 1  |                       | GANFGYDNLVVDMLGFSVMKK          | 168 | 21 | 5  | 21.01 | b6b10b12y1y21                                   | 2305.15 | 78.082  | 36505  | 3 | 769.05  | 4.55   |
| [P65215]KDSA_SALTY 2-dehydro-3-deoxyphohooctonate aldolase | 2  |                       | AGMAVGLAGLFLESHDPANAK          | 226 | 22 | 11 | 95.19 | b3b4b5y2y3y4y5*y5y6y7y <sub>9</sub>             | 2166.09 | 88.003  | 23016  | 3 | 722.70  | -4.51  |
| [P65215]KDSA_SALTY 2-dehydro-3-deoxyphohooctonate aldolase | 3  |                       | VANDLPFVFLGGMNVLESR            | 12  | 19 | 8  | 32.79 | b4b5b13*b13*b13y2y10y1 <sub>4</sub>             | 2078.09 | 110.079 | 13703  | 2 | 1039.55 | 5.64   |
| [P65215]KDSA_SALTY 2-dehydro-3-deoxyphohooctonate aldolase | 4  |                       | GANFGYDNLVVDMLGFSVMK           | 168 | 20 | 6  | 42.56 | b10b15y8y9*y9y10                                | 2177.04 | 101.907 | 3501   | 3 | 726.35  | 0.22   |
| [P65215]KDSA_SALTY 2-dehydro-3-deoxyphohooctonate aldolase | 5  |                       | TGAVINVK                       | 130 | 8  | 4  | 52.23 | b5b6y4y7                                        | 801.47  | 28.201  | 175572 | 2 | 401.24  | -20.64 |
| [P65215]KDSA_SALTY 2-dehydro-3-deoxyphohooctonate aldolase | 6  |                       | DLAMR                          | 31  | 5  | 2  | 27.05 | y3y4                                            | 605.31  | 41.713  | 32644  | 1 | 605.31  | -3.93  |
| [P65215]KDSA_SALTY 2-dehydro-3-deoxyphohooctonate aldolase | 7  | Carbamidomethyl+C(17) | VSGNSPVIFDVTHALQCR             | 189 | 18 | 4  | 16.15 | b4b7*b7y3                                       | 2000.02 | 69.749  | 8729   | 2 | 1000.51 | 9.16   |
| [P65215]KDSA_SALTY 2-dehydro-3-deoxyphohooctonate aldolase | 8  | Carbamidomethyl+C(2)  | ICEHYVTVTQK                    | 36  | 11 | 4  | 32.05 | b7*b7b8b10                                      | 1377.68 | 63.763  | 7494   | 3 | 459.90  | -5.85  |
| [P65215]KDSA_SALTY 2-dehydro-3-deoxyphohooctonate aldolase | 9  |                       | QTDLVEAMAK                     | 120 | 10 | 3  | 37.7  | b7b8b9                                          | 1105.56 | 48.857  | 5501   | 2 | 553.29  | 7.18   |
| [P65215]KDSA_SALTY 2-dehydro-3-deoxyphohooctonate aldolase | 10 |                       | VITDVHEASQAQPVADVVDVIQL PAFLAR | 91  | 29 | 13 | 81.83 | b6b12b13*b13b18b21b23y <sub>4y6y7y8y12y24</sub> | 3101.64 | 104.541 | 5012   | 4 | 776.16  | -8.89  |
| [P65215]KDSA_SALTY 2-dehydro-3-deoxyphohooctonate aldolase | 11 |                       | IFQELK                         | 79  | 6  | 1  | 13.9  | y5                                              | 777.44  | 44.754  | 4771   | 2 | 389.23  | -9.81  |
| [P65215]KDSA_SALTY 2-dehydro-3-deoxyphohooctonate aldolase | 12 |                       | ASFDK                          | 55  | 5  | 1  | 13.53 | y3                                              | 567.28  | 44.513  | 4701   | 1 | 567.28  | 12.70  |
| [P65215]KDSA_SALTY 2-dehydro-3-deoxyphohooctonate aldolase | 13 |                       | GPGLEEGMK                      | 70  | 9  | 3  | 31.3  | b3b7y5                                          | 917.45  | 52.289  | 4581   | 2 | 459.23  | 15.23  |
| [P65215]KDSA_SALTY 2-dehydro-3-deoxyphohooctonate aldolase | 14 |                       | VVNIGDIK                       | 4   | 8  | 4  | 33.93 | b3*b3y4y5                                       | 857.49  | 39.738  | 1890   | 2 | 429.25  | -17.58 |
| [P65215]KDSA_SALTY 2-dehydro-3-deoxyphohooctonate aldolase | 15 |                       | AIDDLVKSFDELDTEN               | 268 | 16 | 3  | 25.49 | b3b11b13                                        | 1823.86 | 68.307  | 5258   | 2 | 912.43  | 1.67   |
| [P65215]KDSA_SALTY 2-dehydro-3-deoxyphohooctonate aldolase | 16 |                       | SSHSYRGPGLLEEGMK               | 63  | 16 | 3  | 17.79 | b8y4y9                                          | 1747.83 | 40.537  | 4655   | 3 | 583.28  | -9.36  |
| [P65215]KDSA_SALTY 2-dehydro-3-deoxyphohooctonate aldolase | 17 | Carbamidomethyl+C(12) | FHEGGNDKVLCDR                  | 154 | 14 | 3  | 19.96 | b4y5y13                                         | 1659.81 | 64.811  | 2987   | 2 | 830.41  | 11.25  |
| [P65215]KDSA_SALTY 2-dehydro-3-deoxyphohooctonate aldolase | 18 | Carbamidomethyl+C(18) | KVSGNSPVIFDVTHALQCR            | 188 | 19 | 6  | 24.5  | b11y4*y4y8y11*y11                               | 2128.08 | 85.010  | 2394   | 2 | 1064.54 | -6.77  |
| [P65215]KDSA_SALTY 2-dehydro-3-deoxyphohooctonate aldolase | 19 | Oxidation+M(23)       | VANDLPFVFLGGMNVLESRDLAM R      | 12  | 24 | 7  | 29.42 | b13*b13y4y6y11*y11y14                           | 2680.40 | 95.634  | 16385  | 3 | 894.14  | 14.48  |
| [P65215]KDSA_SALTY 2-dehydro-3-deoxyphohooctonate aldolase | 20 | Oxidation+M(19)       | GANFGYDNLVVDMLGFSVMK           | 168 | 20 | 4  | 20.59 | b10b15y5y8                                      | 2193.02 | 103.647 | 9520   | 4 | 549.01  | -8.91  |
| [P65215]KDSA_SALTY 2-dehydro-3-deoxyphohooctonate aldolase | 21 | Oxidation+M(19)       | GANFGYDNLVVDMLGFSVMKK          | 168 | 21 | 3  | 21.01 | b5b10b14                                        | 2321.16 | 77.360  | 8611   | 3 | 774.39  | 12.52  |
| [P65215]KDSA_SALTY 2-dehydro-3-deoxyphohooctonate aldolase | 22 | Oxidation+M(8)        | GPGLEEGMK                      | 70  | 9  | 3  | 31.3  | b4b7y8                                          | 933.43  | 70.448  | 6406   | 2 | 467.22  | -5.23  |
| [P65215]KDSA_SALTY 2-dehydro-3-deoxyphohooctonate aldolase | 23 | Oxidation+M(3)        | AGMAVGLAGLFLESHDPANAK          | 226 | 22 | 3  | 13.9  | b5b7y8                                          | 2182.07 | 84.861  | 2419   | 2 | 1091.54 | -13.43 |
| [P63727]C562_SALTY Soluble cytochrome b562                 | 1  |                       | HGFDILVGQIDGALK                | 84  | 15 | 10 | 83.33 | b3b4b7b11y2y3y4y5y6y15                          | 1582.86 | 83.102  | 50457  | 2 | 791.94  | 2.85   |
| [P63727]C562_SALTY Soluble cytochrome b562                 | 2  |                       | TDSAPELK                       | 41  | 8  | 6  | 41.71 | y1y3*y3y4y6y8                                   | 860.43  | 27.485  | 6024   | 2 | 430.72  | -9.72  |
| [P63727]C562_SALTY Soluble cytochrome b562                 | 3  |                       | AAALDAQK                       | 56  | 8  | 5  | 36.94 | b3y3y6y8*y8                                     | 787.42  | 43.987  | 3829   | 1 | 787.42  | -8.60  |

|                                                                               |    |                       |                                                     |     |    |    |       |                             |         |         |       |   |         |        |
|-------------------------------------------------------------------------------|----|-----------------------|-----------------------------------------------------|-----|----|----|-------|-----------------------------|---------|---------|-------|---|---------|--------|
| P63727 C562_SALTY Soluble cytochrome b562                                     | 4  |                       | ATPPK                                               | 64  | 5  | 1  | 13.53 | y4                          | 513.31  | 30.167  | 3944  | 1 | 513.31  | 10.11  |
| P63727 C562_SALTY Soluble cytochrome b562                                     | 5  |                       | MRAALDAQK                                           | 54  | 10 | 11 | 67.49 | b4b7°b7b8°b8y3*y3y4°y4y7*y7 | 1074.58 | 38.356  | 10158 | 2 | 537.79  | 5.11   |
| P69936 YDFG_SALTY NADP-dependent L-serine/L-allo-threonine dehydrogenase ydfG | 1  |                       | AVLPGMVER                                           | 115 | 9  | 5  | 46.59 | b6y2y4y6y7                  | 971.53  | 52.702  | 20823 | 2 | 486.27  | -4.90  |
| P69936 YDFG_SALTY NADP-dependent L-serine/L-allo-threonine dehydrogenase ydfG | 2  |                       | AAIEEMMASLPAQWR                                     | 58  | 15 | 7  | 38.36 | b4b10b14y5y9*y9y15          | 1703.85 | 90.263  | 15663 | 2 | 852.43  | 13.18  |
| P69936 YDFG_SALTY NADP-dependent L-serine/L-allo-threonine dehydrogenase ydfG | 3  |                       | GHIINIGSTAGSWPYAGGNVYGATK                           | 126 | 25 | 9  | 23.73 | b2b3b11°b11b13°b13*b13y9y12 | 2491.22 | 69.909  | 11140 | 3 | 831.08  | -5.59  |
| P69936 YDFG_SALTY NADP-dependent L-serine/L-allo-threonine dehydrogenase ydfG | 4  | Carbamidomethyl+C(15) | MIVLVTGATAGFGECIAR                                  | 0   | 18 | 4  | 25.7  | b8y5y8y13                   | 1865.94 | 88.555  | 6177  | 2 | 933.47  | -10.47 |
| P69936 YDFG_SALTY NADP-dependent L-serine/L-allo-threonine dehydrogenase ydfG | 5  |                       | VTDIEPLVGGETESSVR                                   | 171 | 18 | 3  | 23.31 | y5y9y13                     | 1862.95 | 68.990  | 23924 | 2 | 931.98  | 1.83   |
| P69936 YDFG_SALTY NADP-dependent L-serine/L-allo-threonine dehydrogenase ydfG | 6  |                       | LQALK                                               | 36  | 5  | 2  | 27.05 | y3y4                        | 572.37  | 39.786  | 3963  | 1 | 572.37  | -11.09 |
| P69936 YDFG_SALTY NADP-dependent L-serine/L-allo-threonine dehydrogenase ydfG | 7  |                       | AGKTYENTTALTPEDITEAVWWVATLPAHVNINTVEMMPVTQSFAGLSVHR | 196 | 51 | 5  | 13.61 | b4b9b11°b11y4               | 5596.83 | 101.356 | 11336 | 5 | 1120.17 | 7.50   |
| P66869 SUCC_SALTY Succinyl-CoA ligase [ADP-forming] subunit beta              | 1  | Carbamidomethyl+C(11) | YGLPAPVGYACTTPR                                     | 14  | 15 | 5  | 26.87 | b2y9y10y12y15               | 1622.80 | 61.331  | 48310 | 2 | 811.91  | 2.33   |
| P66869 SUCC_SALTY Succinyl-CoA ligase [ADP-forming] subunit beta              | 2  |                       | VALDPLTGMPYQGR                                      | 146 | 15 | 8  | 57.15 | b10y2y5y7y8y9y13y15         | 1614.84 | 70.739  | 31858 | 2 | 807.92  | 3.48   |
| P66869 SUCC_SALTY Succinyl-CoA ligase [ADP-forming] subunit beta              | 3  |                       | IFMGLATIFLER                                        | 179 | 12 | 10 | 80.8  | b2b3b5y2°y2y3y6y7y9y10      | 1410.77 | 108.396 | 28329 | 2 | 705.89  | -5.36  |
| P66869 SUCC_SALTY Succinyl-CoA ligase [ADP-forming] subunit beta              | 4  |                       | LVTYQTDANGQPVNQILVEAATDIGKELYLGAUVDR                | 80  | 36 | 11 | 66.61 | b2b8y3y4y5°y5y6y7y12y25y36  | 3874.04 | 121.302 | 28030 | 3 | 1292.02 | 4.60   |
| P66869 SUCC_SALTY Succinyl-CoA ligase [ADP-forming] subunit beta              | 5  |                       | DLALIEINPLVITK                                      | 191 | 14 | 6  | 43.71 | b4y3y6y9y10y14              | 1551.93 | 97.455  | 22982 | 2 | 776.47  | -0.47  |
| P66869 SUCC_SALTY Succinyl-CoA ligase [ADP-forming] subunit beta              | 6  |                       | LHGGEPANFLDVGGGATK                                  | 277 | 18 | 5  | 33.93 | b4b7b8y7y11                 | 1739.85 | 58.808  | 21321 | 3 | 580.62  | -11.65 |
| P66869 SUCC_SALTY Succinyl-CoA ligase [ADP-forming] subunit beta              | 7  |                       | LEGNNAELGAK                                         | 348 | 11 | 5  | 32.05 | b2y4y9y10y11                | 1115.56 | 28.912  | 17864 | 2 | 558.28  | -7.44  |
| P66869 SUCC_SALTY Succinyl-CoA ligase [ADP-forming] subunit beta              | 8  |                       | LHGGEPANFLDVGGGATKER                                | 277 | 20 | 7  | 31.57 | b4b8b13°b13*b13b14b20       | 2025.01 | 80.476  | 15751 | 3 | 675.67  | -2.95  |
| P66869 SUCC_SALTY Succinyl-CoA ligase [ADP-forming] subunit beta              | 9  |                       | MNLHEYQAK                                           | 0   | 9  | 7  | 39.08 | b2y2y4*y4y5y6y9             | 1133.54 | 33.566  | 13082 | 2 | 567.27  | -5.06  |
| P66869 SUCC_SALTY Succinyl-CoA ligase [ADP-forming] subunit beta              | 10 |                       | AFAENWLGK                                           | 70  | 9  | 3  | 31.3  | b4b5y7                      | 1035.52 | 64.764  | 11091 | 2 | 518.26  | -4.36  |
| P66869 SUCC_SALTY Succinyl-CoA ligase [ADP-forming] subunit beta              | 11 |                       | VALDPLTGMPYQGRELAFK                                 | 146 | 20 | 3  | 23.02 | b4b5y11                     | 2203.17 | 80.530  | 7928  | 3 | 735.06  | 4.77   |

|                                                                  |    |                                         |                                          |     |    |    |        |                                                                  |         |         |       |   |         |        |
|------------------------------------------------------------------|----|-----------------------------------------|------------------------------------------|-----|----|----|--------|------------------------------------------------------------------|---------|---------|-------|---|---------|--------|
| P66869 SUCC_SALTY Succinyl-CoA ligase [ADP-forming] subunit beta | 12 |                                         | VVFMASTEGGVEIEK                          | 120 | 15 | 5  | 18.79  | b10°b10b12y9y15                                                  | 1595.82 | 112.664 | 4612  | 2 | 798.41  | 13.77  |
| P66869 SUCC_SALTY Succinyl-CoA ligase [ADP-forming] subunit beta | 13 |                                         | VAEETPHLIHK                              | 135 | 11 | 4  | 25.06  | b6b9°b9y8                                                        | 1273.67 | 32.932  | 12546 | 3 | 425.23  | -17.92 |
| P66869 SUCC_SALTY Succinyl-CoA ligase [ADP-forming] subunit beta | 14 |                                         | LGADGNALFR                               | 215 | 10 | 3  | 27.7   | b3b7y5                                                           | 1033.53 | 51.243  | 11229 | 2 | 517.27  | -15.94 |
| P66869 SUCC_SALTY Succinyl-CoA ligase [ADP-forming] subunit beta | 15 |                                         | EAEAAASK                                 | 29  | 8  | 3  | 41.71  | y3y5y6                                                           | 834.39  | 94.063  | 3291  | 1 | 834.39  | 11.56  |
| P66869 SUCC_SALTY Succinyl-CoA ligase [ADP-forming] subunit beta | 16 |                                         | SLTDAAQQVVAAVEGK                         | 372 | 16 | 4  | 36.01  | b6b11b13b14                                                      | 1586.83 | 76.338  | 2822  | 3 | 529.62  | -2.46  |
| P66869 SUCC_SALTY Succinyl-CoA ligase [ADP-forming] subunit beta | 17 |                                         | IILSDDNVK                                | 303 | 9  | 3  | 31.3   | b8y7y8                                                           | 1016.57 | 58.927  | 2421  | 2 | 508.79  | 6.12   |
| P66869 SUCC_SALTY Succinyl-CoA ligase [ADP-forming] subunit beta | 18 | Carbamidomethyl+C(6)                    | QGDLICLDGKLGADGNALFR                     | 205 | 20 | 3  | 23.02  | b12y8y9                                                          | 2133.10 | 93.042  | 3185  | 2 | 1067.05 | 10.42  |
| P66869 SUCC_SALTY Succinyl-CoA ligase [ADP-forming] subunit beta | 19 | Oxidation+M(4)                          | VVFMASTEGGVEIEK                          | 120 | 15 | 5  | 30.4   | b10°b10y7y10y12                                                  | 1611.77 | 79.055  | 4846  | 3 | 537.93  | -14.09 |
| P66869 SUCC_SALTY Succinyl-CoA ligase [ADP-forming] subunit beta | 20 | Carbamidomethyl+C(20)<br>;Oxidation+M() | EAQAAQWELNYVALDGNIGCMV<br>NGAGLAMGTMDIVK | 241 | 36 | 4  | 10.98  | b4b11°b11y14                                                     | 3826.77 | 98.161  | 1907  | 3 | 1276.26 | -4.98  |
| P14062 6PGD_SALTY 6-phohogluconate dehydrogenase                 | 1  |                                         | ITDAYAENADIANLLLAPYFK                    | 373 | 21 | 4  | 35.16  | b5b6b7y21                                                        | 2326.21 | 91.076  | 57191 | 2 | 1163.61 | 4.41   |
| P14062 6PGD_SALTY 6-phohogluconate dehydrogenase                 | 2  |                                         | ELSAEGFNFIGTGVSGGEEGALK                  | 113 | 23 | 7  | 24.54  | b11y1y2y6y7y10y23                                                | 2269.13 | 68.898  | 51700 | 3 | 757.05  | 11.94  |
| P14062 6PGD_SALTY 6-phohogluconate dehydrogenase                 | 3  | Carbamidomethyl+C(11)                   | IAAVAEDGEPCVTYIGADGAGHY<br>VK            | 158 | 25 | 11 | 80.48  | b2b3b4y3y10y12y18y19y2<br>0y21y25                                | 2563.21 | 60.243  | 33764 | 3 | 855.07  | -1.52  |
| P14062 6PGD_SALTY 6-phohogluconate dehydrogenase                 | 4  |                                         | IVSYAQGFSQLR                             | 329 | 12 | 5  | 36.23  | b2y6y7y8y12                                                      | 1368.72 | 62.225  | 21090 | 2 | 684.87  | -1.96  |
| P14062 6PGD_SALTY 6-phohogluconate dehydrogenase                 | 5  |                                         | MVHNGIEYGDMQLIAEAYSLLK                   | 183 | 22 | 6  | 52.59  | b3b12b13y7y8y9                                                   | 2495.23 | 106.358 | 17230 | 3 | 832.42  | 0.98   |
| P14062 6PGD_SALTY 6-phohogluconate dehydrogenase                 | 6  |                                         | AAVLPANLIQAQR                            | 432 | 13 | 5  | 21.35  | b2b3y5y9y13                                                      | 1364.79 | 64.446  | 16832 | 2 | 682.90  | -4.74  |
| P14062 6PGD_SALTY 6-phohogluconate dehydrogenase                 | 7  |                                         | WTSQSALDLGEPLSLITESVFAR                  | 264 | 23 | 21 | 105.22 | b7°b7b8°b8b9°b9°b9b11°<br>b11b13°b13b22y1y3y5y6°<br>y6y7y8y14y23 | 2520.28 | 117.047 | 14905 | 3 | 840.77  | -6.78  |
| P14062 6PGD_SALTY 6-phohogluconate dehydrogenase                 | 8  |                                         | ITDAYAENADIANLLLAPYFKK                   | 373 | 22 | 4  | 23.77  | b5b13b14y22                                                      | 2454.32 | 97.552  | 6129  | 3 | 818.78  | 10.54  |
| P14062 6PGD_SALTY 6-phohogluconate dehydrogenase                 | 9  |                                         | DEDGNYLVDVILDEAANK                       | 242 | 18 | 4  | 16.15  | b8y6°y6y8                                                        | 1992.92 | 79.105  | 5119  | 2 | 996.96  | -12.13 |
| P14062 6PGD_SALTY 6-phohogluconate dehydrogenase                 | 10 |                                         | DVVAYAVQNGIPVPTFSAAVAYY<br>DSYR          | 405 | 27 | 7  | 35.06  | b3b7°b7b8°b8b11b16                                               | 2936.44 | 124.046 | 4441  | 3 | 979.48  | -3.82  |
| P14062 6PGD_SALTY 6-phohogluconate dehydrogenase                 | 11 |                                         | GYTVSVFNR                                | 25  | 9  | 4  | 31.3   | b2b3b5y3                                                         | 1042.52 | 27.873  | 1592  | 2 | 521.77  | -6.79  |
| P14062 6PGD_SALTY 6-phohogluconate dehydrogenase                 | 12 | Carbamidomethyl+C(3)                    | AGCIIR                                   | 361 | 6  | 1  | 13.9   | b3                                                               | 689.37  | 36.336  | 7627  | 1 | 689.37  | -3.28  |
| P14062 6PGD_SALTY 6-phohogluconate dehydrogenase                 | 13 |                                         | AEFIEK                                   | 314 | 6  | 1  | 13.9   | y5                                                               | 736.38  | 55.295  | 5852  | 1 | 736.38  | -4.31  |
| P14062 6PGD_SALTY 6-phohogluconate dehydrogenase                 | 14 |                                         | IADEYQQALR                               | 395 | 10 | 3  | 27.7   | b4b9y7                                                           | 1206.59 | 42.894  | 3805  | 2 | 603.80  | -17.30 |
| P14062 6PGD_SALTY 6-phohogluconate dehydrogenase                 | 15 |                                         | SKQQIGVVGMAMVGR                          | 1   | 15 | 4  | 18.79  | b4b11°b11y9                                                      | 1560.85 | 122.768 | 12012 | 2 | 780.93  | 11.50  |

|                                                  |    |                                          |                                    |     |    |    |       |                                  |         |         |       |   |         |        |
|--------------------------------------------------|----|------------------------------------------|------------------------------------|-----|----|----|-------|----------------------------------|---------|---------|-------|---|---------|--------|
| P14062 6PGD_SALTY 6-phohogluconate dehydrogenase | 16 |                                          | MSKQQIGVVGMAMVGR                   | 0   | 16 | 3  | 17.79 | b12b15y12                        | 1691.85 | 100.843 | 6204  | 2 | 846.43  | -13.78 |
| P14062 6PGD_SALTY 6-phohogluconate dehydrogenase | 17 |                                          | AASDEYHWDLNYGEIAKIFR               | 341 | 20 | 3  | 23.02 | b5y16y17                         | 2398.17 | 95.700  | 5071  | 3 | 800.06  | 9.37   |
| P14062 6PGD_SALTY 6-phohogluconate dehydrogenase | 18 |                                          | QQIGVVGMAMVGRNLALNIESR             | 3   | 22 | 3  | 13.9  | b8b14y5                          | 2356.23 | 68.017  | 2464  | 3 | 786.08  | -14.30 |
| P14062 6PGD_SALTY 6-phohogluconate dehydrogenase | 19 | Phosphoryl STY(12)                       | ELSAEGFNFIGTGVSGGEEGALK            | 113 | 23 | 8  | 58.09 | b4_H3PO4<br>b4b5b8b10°b10y8y9y10 | 2349.07 | 111.457 | 2357  | 3 | 783.70  | 6.65   |
| P14062 6PGD_SALTY 6-phohogluconate dehydrogenase | 20 | Phosphoryl STY(11)                       | DAYELVAPILTK                       | 146 | 12 | 3  | 33.22 | b6b9b11                          | 1412.71 | 84.949  | 2258  | 3 | 471.57  | 5.10   |
| P14062 6PGD_SALTY 6-phohogluconate dehydrogenase | 21 | Phosphoryl STY(8)                        | EFVESLETPR                         | 58  | 10 | 3  | 27.7  | b7b9y8                           | 1286.54 | 63.365  | 1755  | 3 | 429.52  | -12.43 |
| P0A2T6 CRP_SALTY Catabolite gene activator       | 1  |                                          | QLIQVNPDILMR                       | 104 | 12 | 7  | 55.81 | b3y6y7y8*y8y9*y9                 | 1439.79 | 79.872  | 8604  | 2 | 720.40  | -7.29  |
| P0A2T6 CRP_SALTY Catabolite gene activator       | 2  |                                          | VGNLAFLDVTGR                       | 131 | 12 | 4  | 30.21 | y2y5y6y11                        | 1261.69 | 65.886  | 6690  | 2 | 631.35  | -3.77  |
| P0A2T6 CRP_SALTY Catabolite gene activator       | 3  |                                          | DEEGKEMILSYLNQGDFIGELGLF<br>EEGQER | 53  | 30 | 3  | 12.08 | y5°y5y12                         | 3445.59 | 95.708  | 3983  | 3 | 1149.20 | -4.61  |
| P0A2T6 CRP_SALTY Catabolite gene activator       | 4  | Carbamidomethyl+C(18)                    | VLGKPQTDPTLEWFLSHCHHK              | 1   | 22 | 6  | 52.85 | y3y5y7y8y10y11                   | 2643.29 | 85.854  | 21392 | 3 | 881.77  | -22.07 |
| P0A2T6 CRP_SALTY Catabolite gene activator       | 5  | Carbamidomethyl+C(9)                     | QEIGQIVGCSR                        | 170 | 11 | 4  | 25.06 | b9y8y10*y10                      | 1246.65 | 63.803  | 6127  | 2 | 623.83  | 21.74  |
| P0A2T6 CRP_SALTY Catabolite gene activator       | 6  |                                          | MLEDQNLISAHGK                      | 189 | 13 | 4  | 35.82 | b10b11b12°b12                    | 1455.75 | 83.226  | 3503  | 2 | 728.38  | 19.20  |
| P0A2T6 CRP_SALTY Catabolite gene activator       | 7  |                                          | EMILSYLNQGDFIGELGLFEEGQER          | 58  | 25 | 6  | 19.53 | b8°b8b11b16y13*y13               | 2887.34 | 91.925  | 1963  | 3 | 963.12  | -15.56 |
| P0A2T6 CRP_SALTY Catabolite gene activator       | 8  | Carbamidomethyl+C(12)                    | ITRQEIGQIVGCSR                     | 167 | 14 | 3  | 28.54 | y3y5y11                          | 1616.84 | 51.828  | 3950  | 3 | 539.62  | -9.44  |
| P0A2T6 CRP_SALTY Catabolite gene activator       | 9  | Oxidation+M(1)                           | MLEDQNLISAHGK                      | 189 | 13 | 4  | 21.35 | b10°b10y3y5                      | 1471.72 | 57.120  | 7647  | 2 | 736.36  | -2.32  |
| P0A2T6 CRP_SALTY Catabolite gene activator       | 10 | Carbamidomethyl+C(19)<br>;Oxidation+M(1) | MVLGKPQTDPTLEWFLSHCHHK             | 0   | 23 | 3  | 13.48 | b13y11y20                        | 2790.39 | 100.356 | 2985  | 3 | 930.80  | 1.57   |
| P0A2T6 CRP_SALTY Catabolite gene activator       | 11 |                                          | DEEGKEMILSYLNQGDFIGEL              | 53  | 21 | 3  | 12.08 | y6y12*y12                        | 2400.11 | 95.658  | 2019  | 4 | 600.78  | -8.04  |
| P0A2T6 CRP_SALTY Catabolite gene activator       | 12 |                                          | DEEGKEMILSYLNQGDFIGELGLF<br>EEGQER | 53  | 30 | 1  | 8.98  | y13                              | 3427.64 | 95.716  | 2688  | 3 | 1143.22 | 13.68  |
| P0A7V6 RS3_SALTY 30S ribosomal protein S3        | 1  |                                          | LVADSITSQLER                       | 114 | 12 | 10 | 70.58 | b2b5y1y3y6y8y9*y9y10y12          | 1331.71 | 60.431  | 45501 | 2 | 666.36  | -1.92  |
| P0A7V6 RS3_SALTY 30S ribosomal protein S3        | 2  |                                          | ADIDYNTSEAHTTYGVIGVK               | 179 | 20 | 6  | 42.09 | y3y10y11y15y17y20                | 2154.02 | 56.097  | 35157 | 3 | 718.68  | -5.21  |
| P0A7V6 RS3_SALTY 30S ribosomal protein S3        | 3  |                                          | VVADIAGVPAQINIAEVR                 | 89  | 18 | 7  | 42.31 | b3b8y4°y4y10y12y13               | 1835.04 | 76.609  | 26130 | 2 | 918.02  | -1.00  |
| P0A7V6 RS3_SALTY 30S ribosomal protein S3        | 4  |                                          | LGGAEIAR                           | 156 | 8  | 7  | 36.94 | b2b5°b5y2y3y7y8                  | 786.44  | 30.725  | 22206 | 2 | 393.72  | -9.31  |
| P0A7V6 RS3_SALTY 30S ribosomal protein S3        | 5  |                                          | LGIVKPWNSTWFANTKEFADNLD<br>SDFK    | 11  | 27 | 5  | 18.31 | b2y2y5y10y13                     | 3143.52 | 94.416  | 13350 | 4 | 786.64  | -8.08  |
| P0A7V6 RS3_SALTY 30S ribosomal protein S3        | 6  |                                          | LGIVKPWNSTWFANTK                   | 11  | 16 | 3  | 17.79 | b13y6y10                         | 1861.96 | 82.581  | 5018  | 2 | 931.48  | -18.16 |
| P0A7V6 RS3_SALTY 30S ribosomal protein S3        | 7  |                                          | GEILGGMAAVEQPEKPAAQPK              | 204 | 21 | 4  | 14.36 | b20y4*y4y11                      | 2121.06 | 54.613  | 4865  | 4 | 531.02  | -19.45 |
| P0A7V6 RS3_SALTY 30S ribosomal protein S3        | 8  |                                          | VMFR                               | 127 | 4  | 1  | 13.15 | y3                               | 552.29  | 75.756  | 3023  | 1 | 552.29  | -14.04 |
| P0A7V6 RS3_SALTY 30S ribosomal protein S3        | 9  |                                          | AVQNAMR                            | 136 | 7  | 4  | 57.87 | b5b6y3y6                         | 789.40  | 94.956  | 2499  | 1 | 789.40  | 0.15   |
| P0A7V6 RS3_SALTY 30S ribosomal protein S3        | 10 |                                          | LVADSITSQL                         | 114 | 10 | 0  | 2.64  |                                  | 1046.58 | 60.471  | 6070  | 2 | 523.80  | 10.15  |

|                                                                                         |    |                       |                                         |     |    |    |        |                                                                    |         |         |        |   |         |        |
|-----------------------------------------------------------------------------------------|----|-----------------------|-----------------------------------------|-----|----|----|--------|--------------------------------------------------------------------|---------|---------|--------|---|---------|--------|
| O68883 CISY_SALTY Citrate synthase                                                      | 1  | Carbamidomethyl+C(12) | TAGSSGANPFACIAAGIASLWGPA<br>HGGANEAAALK | 240 | 34 | 24 | 112.81 | b2°b2b6°b6b8°b8b9b13°b13y1y2y3y9y12y13y14y16y17y25y26°y26y27y29y34 | 3195.58 | 116.120 | 47760  | 3 | 1065.86 | 4.66   |
| O68883 CISY_SALTY Citrate synthase                                                      | 2  |                       | TVGWIAHWNEMHTDGMK                       | 388 | 17 | 11 | 35.22  | b1b2°b2b3°b3b6°b6b7y2y11y15                                        | 2012.89 | 66.041  | 31482  | 3 | 671.64  | -8.91  |
| O68883 CISY_SALTY Citrate synthase                                                      | 3  |                       | ILILHADHEQNASTSTVR                      | 222 | 18 | 8  | 41.86  | b2b3y2y4y5y6y8y18                                                  | 2005.03 | 43.502  | 28325  | 3 | 669.02  | -6.82  |
| O68883 CISY_SALTY Citrate synthase                                                      | 4  | Carbamidomethyl+C(15) | GVFTFDPGFTSTASCESK                      | 38  | 18 | 5  | 37.46  | b12y11y12y13y18                                                    | 1937.87 | 75.557  | 23150  | 2 | 969.44  | 8.00   |
| O68883 CISY_SALTY Citrate synthase                                                      | 5  | Carbamidomethyl+C(18) | NDLSYAGNFLNMMFSTPCETYEV<br>NPVLER       | 189 | 29 | 10 | 42.3   | b4°b4y2°y2y3y5y7y10y13y14                                          | 3411.56 | 111.151 | 18548  | 3 | 1137.86 | 8.02   |
| O68883 CISY_SALTY Citrate synthase                                                      | 6  | Carbamidomethyl+C(9)  | DSHPMAVMCGITGALAAFYHDSL<br>DVNNPR       | 127 | 29 | 20 | 170.66 | b3°b3b4b5b6b7b8b12b15y2y4y5y6y9y10y11y12y13y17y29                  | 3159.42 | 108.183 | 16941  | 4 | 790.61  | -8.35  |
| O68883 CISY_SALTY Citrate synthase                                                      | 7  |                       | AMGIPSSMFTVIFAMAR                       | 371 | 17 | 4  | 28.3   | b3y3y4y6                                                           | 1829.93 | 119.405 | 15859  | 2 | 915.47  | 8.81   |
| O68883 CISY_SALTY Citrate synthase                                                      | 8  |                       | ELGTKDDLLEVAAMELEHIALNDP<br>YFIEK       | 328 | 28 | 12 | 65.73  | b3b4b6°b6b8b21y1y5y6y8y9y28                                        | 3245.61 | 119.513 | 12885  | 4 | 812.16  | -5.57  |
| O68883 CISY_SALTY Citrate synthase                                                      | 9  |                       | DDLLEVAAMELEHIALNDPYFIEK                | 333 | 23 | 3  | 19.89  | b5b8b12                                                            | 2717.34 | 107.387 | 4886   | 4 | 680.09  | 2.16   |
| O68883 CISY_SALTY Citrate synthase                                                      | 10 | Carbamidomethyl+C(10) | RDSHPMAVMCGITGALAAFYHDS<br>LDVNNPR      | 126 | 30 | 3  | 22.23  | b13y11y12                                                          | 3315.58 | 93.549  | 2997   | 3 | 1105.87 | 10.46  |
| O68883 CISY_SALTY Citrate synthase                                                      | 11 | Carbamidomethyl+C(8)  | ATVMRETCHVEVLK                          | 315 | 13 | 3  | 30.59  | y6y8y10                                                            | 1573.76 | 63.894  | 1518   | 2 | 787.39  | -11.79 |
| O68883 CISY_SALTY Citrate synthase                                                      | 12 |                       | ITFIDGDEGILLHR                          | 56  | 14 | 7  | 55.32  | b5b13y4y10y11°y11y12                                               | 1598.83 | 74.544  | 35314  | 3 | 533.61  | -16.72 |
| O68883 CISY_SALTY Citrate synthase                                                      | 13 |                       | YSIGQPFVYPR                             | 178 | 11 | 3  | 32.05  | y5y6y9                                                             | 1326.68 | 68.259  | 28506  | 2 | 663.84  | -5.24  |
| O68883 CISY_SALTY Citrate synthase                                                      | 14 |                       | LMGFGHR                                 | 300 | 7  | 3  | 38.33  | b5y4y5                                                             | 817.41  | 41.526  | 18442  | 2 | 409.21  | -0.82  |
| O68883 CISY_SALTY Citrate synthase                                                      | 15 |                       | NYDPR                                   | 310 | 5  | 1  | 13.53  | y4                                                                 | 664.30  | 87.714  | 3124   | 1 | 664.30  | -9.83  |
| O68883 CISY_SALTY Citrate synthase                                                      | 16 |                       | TTVTRHTMIHEQITR                         | 105 | 15 | 5  | 44.38  | b6b8b14y9y10                                                       | 1823.96 | 99.445  | 303317 | 2 | 912.48  | 2.68   |
| O68883 CISY_SALTY Citrate synthase                                                      | 17 |                       | ELGTKDDLLEVAAMELEHIALNDP<br>YFIEK       | 328 | 28 | 4  | 22.22  | b19y8y9°y9                                                         | 3245.62 | 104.504 | 1867   | 4 | 812.16  | -3.91  |
| O68883 CISY_SALTY Citrate synthase                                                      | 18 | Oxidation+M(15)       | AMGIPSSMFTVIFAMAR                       | 371 | 17 | 3  | 16.91  | b8b16y4                                                            | 1845.89 | 43.987  | 50574  | 3 | 615.97  | -6.81  |
| Q9L6N1 METE_SALTY 5-methyltetrahydropteroyltriglutamate--homocysteine methyltransferase | 1  |                       | WFENTNYHYIVPEFSK                        | 117 | 15 | 6  | 42.44  | b2y3y5y10y13y15                                                    | 1944.91 | 77.613  | 54516  | 3 | 648.98  | -8.54  |
| Q9L6N1 METE_SALTY 5-methyltetrahydropteroyltriglutamate--homocysteine methyltransferase | 2  | Carbamidomethyl+C(7)  | LWVNPDCGLK                              | 719 | 10 | 10 | 88.8   | b2b7b9y4y6y7y8°y8y9y10                                             | 1201.60 | 60.295  | 46991  | 2 | 601.30  | -5.89  |
| Q9L6N1 METE_SALTY 5-methyltetrahydropteroyltriglutamate--homocysteine methyltransferase | 3  |                       | TILTHTLGFPR                             | 1   | 11 | 6  | 36.82  | y2y5y6y7°y7y11                                                     | 1255.72 | 63.992  | 37574  | 2 | 628.36  | 1.94   |
| Q9L6N1 METE_SALTY 5-methyltetrahydropteroyltriglutamate--homocysteine methyltransferase | 4  |                       | QAGIDLLPVGDFAWYDHVLTSSL<br>LLGNVPAR     | 52  | 31 | 16 | 96.47  | b5°b5°b5b6°b6b31y1y3y4y5y6y7y8y24y27y31                            | 3351.80 | 119.164 | 35705  | 3 | 1117.94 | 9.03   |
| Q9L6N1 METE_SALTY 5-methyltetrahydropteroyltriglutamate--homocysteine methyltransferase | 5  |                       | LTWTQLLEEVDEALALGHK                     | 137 | 19 | 18 | 129.61 | b2°b2b5°b5b19y2y3y5y6y7y8y9y12y13y15y17°y17y19                     | 2166.13 | 118.619 | 30683  | 3 | 722.72  | -5.30  |
| Q9L6N1 METE_SALTY 5-methyltetrahydropteroyltriglutamate--homocysteine methyltransferase | 6  | Carbamidomethyl+C(11) | GMLTGPVTILCWSFPR                        | 549 | 16 | 8  | 36.68  | b6b12b13y1y2y7y9y16                                                | 1834.95 | 99.366  | 25592  | 2 | 917.98  | 9.98   |

|                                                                                         |    |                      |                              |     |    |    |       |                         |         |         |       |   |         |        |
|-----------------------------------------------------------------------------------------|----|----------------------|------------------------------|-----|----|----|-------|-------------------------|---------|---------|-------|---|---------|--------|
| Q9L6N1 METE_SALTY 5-methyltetrahydropteroyltriglutamate--homocysteine methyltransferase | 7  |                      | SWFAFALQK                    | 343 | 9  | 7  | 46.08 | b2b5b6y3y7*y7y9         | 1097.57 | 84.876  | 25515 | 2 | 549.29  | -5.67  |
| Q9L6N1 METE_SALTY 5-methyltetrahydropteroyltriglutamate--homocysteine methyltransferase | 8  |                      | LAAITAQDSQRENPYEV            | 395 | 18 | 7  | 37.46 | b2b3y2y14y15y16y18      | 2061.02 | 47.249  | 24422 | 3 | 687.68  | -6.40  |
| Q9L6N1 METE_SALTY 5-methyltetrahydropteroyltriglutamate--homocysteine methyltransferase | 9  |                      | LPVDWLLSAGLINGR              | 279 | 15 | 7  | 32.78 | b2b3b4y2y8y13y15        | 1623.93 | 101.214 | 23468 | 2 | 812.47  | 3.61   |
| Q9L6N1 METE_SALTY 5-methyltetrahydropteroyltriglutamate--homocysteine methyltransferase | 10 | Carbamidomethyl+C(1) | CVKPPVVIGDISRPAPITVEWAK      | 515 | 23 | 10 | 46.33 | b2b4b6b7y2y5y6y15y20y23 | 2532.40 | 75.444  | 19991 | 3 | 844.80  | -1.45  |
| Q9L6N1 METE_SALTY 5-methyltetrahydropteroyltriglutamate--homocysteine methyltransferase | 11 |                      | LAAITAQDSQR                  | 395 | 11 | 10 | 89.17 | b2b3y3y4*y4y5y6y9y10y11 | 1173.62 | 33.894  | 18491 | 2 | 587.31  | -5.10  |
| Q9L6N1 METE_SALTY 5-methyltetrahydropteroyltriglutamate--homocysteine methyltransferase | 12 | Carbamidomethyl+C(1) | CGELALLR                     | 352 | 8  | 5  | 36.94 | b2b3b6y5y8              | 931.49  | 60.169  | 17692 | 2 | 466.25  | -11.14 |
| Q9L6N1 METE_SALTY 5-methyltetrahydropteroyltriglutamate--homocysteine methyltransferase | 13 | Carbamidomethyl+C(8) | ALWVASSCSLLHSPIDLSVETR       | 315 | 22 | 3  | 13.9  | b3b14y7                 | 2441.23 | 87.690  | 12022 | 3 | 814.42  | -5.90  |
| Q9L6N1 METE_SALTY 5-methyltetrahydropteroyltriglutamate--homocysteine methyltransferase | 14 |                      | DALNSGETAALKEWSAPIQAR        | 360 | 21 | 5  | 24.02 | b2b4b5b11°b11           | 2229.08 | 60.903  | 9767  | 3 | 743.70  | 1.42   |
| Q9L6N1 METE_SALTY 5-methyltetrahydropteroyltriglutamate--homocysteine methyltransferase | 15 |                      | YAQSLTDKPVK                  | 538 | 11 | 7  | 49.11 | b4b6b7°b7°b7y3y8        | 1249.65 | 30.722  | 32317 | 3 | 417.22  | -19.24 |
| Q9L6N1 METE_SALTY 5-methyltetrahydropteroyltriglutamate--homocysteine methyltransferase | 16 |                      | AQESYWAGNTTR                 | 21  | 12 | 4  | 23.01 | b6b10y8°y8              | 1383.64 | 29.251  | 28544 | 2 | 692.32  | 5.38   |
| Q9L6N1 METE_SALTY 5-methyltetrahydropteroyltriglutamate--homocysteine methyltransferase | 17 |                      | HQNNDGSDIDTLFR               | 83  | 15 | 8  | 67.76 | b3b9b10y4y5y7°y7y8      | 1730.78 | 69.275  | 15159 | 3 | 577.60  | -15.94 |
| Q9L6N1 METE_SALTY 5-methyltetrahydropteroyltriglutamate--homocysteine methyltransferase | 18 |                      | GQQFR                        | 132 | 5  | 1  | 13.53 | b3                      | 635.32  | 41.376  | 6965  | 1 | 635.32  | -7.69  |
| Q9L6N1 METE_SALTY 5-methyltetrahydropteroyltriglutamate--homocysteine methyltransferase | 19 |                      | DEVADLEAAGIGIIQIDEPALR       | 582 | 22 | 4  | 30.14 | b4b5b11b15              | 2308.16 | 92.146  | 6665  | 3 | 770.06  | -19.88 |
| Q9L6N1 METE_SALTY 5-methyltetrahydropteroyltriglutamate--homocysteine methyltransferase | 20 |                      | VHNAAVEK                     | 386 | 8  | 4  | 36.94 | b3b7y4°y4               | 867.46  | 37.288  | 2872  | 2 | 434.23  | -6.61  |
| Q9L6N1 METE_SALTY 5-methyltetrahydropteroyltriglutamate--homocysteine methyltransferase | 21 |                      | NDMVEYFGEHLDFGVFTQNGWVQSYGSR | 487 | 28 | 4  | 12    | b11y5y12*y12            | 3282.53 | 94.552  | 2643  | 3 | 1094.85 | 22.16  |
| Q9L6N1 METE_SALTY 5-methyltetrahydropteroyltriglutamate--homocysteine methyltransferase | 22 |                      | AEAQR                        | 413 | 5  | 2  | 13.53 | y4*y4                   | 574.29  | 87.614  | 1617  | 1 | 574.29  | -12.86 |
| Q9L6N1 METE_SALTY 5-methyltetrahydropteroyltriglutamate--homocysteine methyltransferase | 23 |                      | GWPETR                       | 731 | 6  | 1  | 13.9  | b5                      | 745.36  | 59.024  | 1527  | 1 | 745.36  | -5.00  |
| Q9L6N1 METE_SALTY 5-methyltetrahydropteroyltriglutamate--homocysteine methyltransferase | 24 |                      | GNLDANHYRTGIAEHK             | 449 | 17 | 5  | 40.37 | b5b8b13b15y5            | 1908.97 | 120.417 | 22217 | 2 | 954.99  | 3.52   |
| Q9L6N1 METE_SALTY 5-methyltetrahydropteroyltriglutamate--homocysteine methyltransferase | 25 |                      | GRAPTGEPAAAAEMTK             | 101 | 16 | 4  | 28.6  | b3b5b7y7                | 1557.75 | 35.385  | 19971 | 3 | 519.92  | -9.17  |



|                                                                                         |    |                                          |                                                     |     |    |   |       |                       |         |         |       |   |         |       |
|-----------------------------------------------------------------------------------------|----|------------------------------------------|-----------------------------------------------------|-----|----|---|-------|-----------------------|---------|---------|-------|---|---------|-------|
| Q9L6N1 METE_SALTY 5-methyltetrahydropteroyltriglutamate--homocysteine methyltransferase | 26 | Carbamidomethyl+C(22)                    | YAQSLTDKPVKGMLTGPVTILCW SFPR                        | 538 | 27 | 6 | 37.07 | b5b6*b6b7°b7b13       | 3065.58 | 99.378  | 14558 | 4 | 767.15  | -5.65 |
| Q9L6N1 METE_SALTY 5-methyltetrahydropteroyltriglutamate--homocysteine methyltransferase | 27 |                                          | ADLTEKYAQINAIVGK                                    | 298 | 16 | 5 | 28.6  | b4°b4b9b11y10         | 1733.95 | 58.754  | 4086  | 3 | 578.65  | 1.41  |
| Q9L6N1 METE_SALTY 5-methyltetrahydropteroyltriglutamate--homocysteine methyltransferase | 28 |                                          | KAQESYWAGNTTR                                       | 20  | 13 | 9 | 58.16 | b4°b4b6°b6*b6b8y4y6y8 | 1511.72 | 34.942  | 3409  | 2 | 756.36  | -3.31 |
| Q9L6N1 METE_SALTY 5-methyltetrahydropteroyltriglutamate--homocysteine methyltransferase | 29 |                                          | KGNLDANHYR                                          | 448 | 10 | 5 | 40.43 | b7b9y4y7°y7           | 1187.60 | 55.948  | 3040  | 3 | 396.54  | 3.39  |
| Q9L6N1 METE_SALTY 5-methyltetrahydropteroyltriglutamate--homocysteine methyltransferase | 30 | Carbamidomethyl+C(12)                    | IPAQRLWVNPDCGLK                                     | 714 | 15 | 3 | 18.79 | b4y3y10               | 1766.95 | 73.513  | 2605  | 3 | 589.65  | 4.77  |
| Q9L6N1 METE_SALTY 5-methyltetrahydropteroyltriglutamate--homocysteine methyltransferase | 31 |                                          | NVWRADLTEK                                          | 294 | 10 | 3 | 27.7  | b4b6y6                | 1231.64 | 49.771  | 2106  | 2 | 616.32  | -6.44 |
| Q9L6N1 METE_SALTY 5-methyltetrahydropteroyltriglutamate--homocysteine methyltransferase | 32 | Carbamidomethyl+C(7)                     | LWVNPDCGLKTR                                        | 719 | 12 | 7 | 35.29 | b3b8b9°b9*b9y7°y7     | 1458.77 | 56.450  | 1623  | 2 | 729.89  | 9.62  |
| Q9L6N1 METE_SALTY 5-methyltetrahydropteroyltriglutamate--homocysteine methyltransferase | 33 | Phosphoryl STY(5)                        | AQESYWAGNTTR                                        | 21  | 12 | 3 | 23.01 | b4y3y6                | 1463.60 | 66.343  | 1864  | 3 | 488.54  | 11.84 |
| Q9L6N1 METE_SALTY 5-methyltetrahydropteroyltriglutamate--homocysteine methyltransferase | 34 | Oxidation+M(12)                          | APTGEPA AAAEMTK                                     | 103 | 14 | 3 | 19.96 | b7b10y4               | 1360.63 | 25.562  | 37990 | 3 | 454.21  | -8.70 |
| Q9L6N1 METE_SALTY 5-methyltetrahydropteroyltriglutamate--homocysteine methyltransferase | 35 | Carbamidomethyl+C(11)<br>;Oxidation+M(2) | GMLTGPVTILCWSFPR                                    | 549 | 16 | 4 | 17.79 | b4°b4b8y7             | 1850.94 | 49.861  | 2186  | 2 | 925.98  | 7.45  |
| Q9L6N1 METE_SALTY 5-methyltetrahydropteroyltriglutamate--homocysteine methyltransferase | 36 |                                          | WFNTNYHYIV                                          | 117 | 10 | 2 | 7.3   | y9°y9                 | 1356.65 | 77.635  | 10687 | 2 | 678.83  | 10.26 |
| Q8ZPD6 YNCE_SALTY Uncharacterized protein yncE                                          | 1  |                                          | TFDTPTYPNSLALSADGK                                  | 308 | 18 | 8 | 35.84 | b4y2y4°y4y5y11y14y18  | 1897.93 | 65.518  | 28080 | 2 | 949.47  | 5.40  |
| Q8ZPD6 YNCE_SALTY Uncharacterized protein yncE                                          | 2  |                                          | MSTGLALDSK                                          | 185 | 10 | 6 | 59.52 | b3y3y7y8y9y10         | 1022.53 | 47.007  | 12732 | 2 | 511.77  | 10.80 |
| Q8ZPD6 YNCE_SALTY Uncharacterized protein yncE                                          | 3  |                                          | LDPVTLEITQAIHNDLKPFGATINA<br>ATQTLWFGNTINS AVTAIDAK | 73  | 46 | 4 | 16.44 | y2y3y6y15             | 4894.52 | 127.580 | 10649 | 4 | 1224.38 | -9.68 |
| Q8ZPD6 YNCE_SALTY Uncharacterized protein yncE                                          | 4  |                                          | IAAPASLAVLFNPTR                                     | 268 | 15 | 6 | 18.79 | b1b3y5*y5y12y15       | 1540.89 | 89.744  | 10321 | 2 | 770.95  | 1.58  |
| Q8ZPD6 YNCE_SALTY Uncharacterized protein yncE                                          | 5  |                                          | LLDDGKEHFFINLSLDTAGHR                               | 223 | 21 | 3 | 14.36 | b8b11y6               | 2398.23 | 75.813  | 9938  | 3 | 800.08  | 6.62  |
| Q8ZPD6 YNCE_SALTY Uncharacterized protein yncE                                          | 6  |                                          | LYTTNADGEFTIDTASNK                                  | 198 | 19 | 6 | 24.5  | b8y5°y5y8y11y19       | 2074.01 | 65.467  | 9571  | 2 | 1037.51 | 8.36  |
| Q8ZPD6 YNCE_SALTY Uncharacterized protein yncE                                          | 7  |                                          | GAYEMAWSQQENALWLATSQSR                              | 41  | 22 | 5 | 25    | b3y4y10*y10y11        | 2527.19 | 84.331  | 5175  | 2 | 1264.10 | 8.60  |
| Q8ZPD6 YNCE_SALTY Uncharacterized protein yncE                                          | 8  |                                          | ELVADAATNTIYISGVGK                                  | 144 | 18 | 3 | 16.15 | b6b12y14              | 1821.96 | 81.903  | 42663 | 2 | 911.49  | 2.48  |
| Q8ZPD6 YNCE_SALTY Uncharacterized protein yncE                                          | 9  |                                          | LVL DAR                                             | 126 | 6  | 1 | 13.9  | b3                    | 686.41  | 51.631  | 14943 | 1 | 686.41  | -8.98 |
| Q8ZPD6 YNCE_SALTY Uncharacterized protein yncE                                          | 10 |                                          | EHFFINLSLDTAGHR                                     | 229 | 15 | 3 | 18.79 | b4y8y11               | 1756.88 | 56.540  | 11002 | 2 | 878.94  | 0.35  |
| Q8ZPD6 YNCE_SALTY Uncharacterized protein yncE                                          | 11 |                                          | TGDVK                                               | 119 | 5  | 1 | 13.53 | b4                    | 519.27  | 64.686  | 5532  | 1 | 519.27  | -7.52 |
| Q8ZPD6 YNCE_SALTY Uncharacterized protein yncE                                          | 12 |                                          | LLDDGK                                              | 223 | 6  | 1 | 13.9  | b3                    | 660.36  | 33.569  | 3928  | 1 | 660.36  | 8.97  |

|                                                   |    |                       |                                             |     |    |    |       |                                                                |         |         |        |   |         |        |
|---------------------------------------------------|----|-----------------------|---------------------------------------------|-----|----|----|-------|----------------------------------------------------------------|---------|---------|--------|---|---------|--------|
| Q8ZPD6 YNCE_SALTY Uncharacterized protein yncE    | 13 |                       | EQEATQPDDVIR                                | 338 | 12 | 4  | 26.99 | b7b8y8*y8                                                      | 1400.66 | 27.783  | 3406   | 2 | 700.83  | -3.83  |
| Q8ZPD6 YNCE_SALTY Uncharacterized protein yncE    | 14 |                       | IAAPASLAVLFNPNTRNEAYVTHR                    | 268 | 23 | 8  | 54.36 | b3y6y10y11*y11y12y18y20                                        | 2511.31 | 82.072  | 42391  | 4 | 628.58  | -12.74 |
| Q8ZPD6 YNCE_SALTY Uncharacterized protein yncE    | 15 |                       | TTIENTGKMSTGLALDSK                          | 177 | 18 | 5  | 25.07 | b5b6*b6b12*b12                                                 | 1866.95 | 50.482  | 7522   | 4 | 467.49  | 1.77   |
| Q8ZPD6 YNCE_SALTY Uncharacterized protein yncE    | 16 |                       | AQRLYTTNADGEFITIDTASNK                      | 195 | 22 | 3  | 13.9  | b3b11y11                                                       | 2429.19 | 87.531  | 5394   | 3 | 810.40  | -2.61  |
| Q8ZPD6 YNCE_SALTY Uncharacterized protein yncE    | 17 |                       | LLDDGKEHFFINLSLDTAGHR                       | 223 | 21 | 3  | 21.01 | b3b10b12                                                       | 2398.24 | 76.724  | 2694   | 3 | 800.09  | 12.22  |
| Q8ZPD6 YNCE_SALTY Uncharacterized protein yncE    | 18 | Phosphoryl STY(20)    | TEEVRLQPRLVADAATNTIYISG<br>VGKESAIWVVDGETIK | 134 | 41 | 4  | 14.36 | b8b17b19y20                                                    | 4535.36 | 108.391 | 31675  | 5 | 907.88  | 13.46  |
| Q8ZPD6 YNCE_SALTY Uncharacterized protein yncE    | 19 | Phosphoryl STY(7)     | GSLLGSLLVASSFSTLAAEDMLR<br>K                | 12  | 25 | 3  | 23.27 | b5b6b14                                                        | 2659.35 | 88.967  | 7791   | 3 | 887.12  | -6.70  |
| Q8ZPD6 YNCE_SALTY Uncharacterized protein yncE    | 20 |                       | LLDDGKEHFFINLSLDTAGH                        | 223 | 20 | 2  | 12.88 | y7y13                                                          | 2242.11 | 75.829  | 28193  | 2 | 1121.56 | -2.07  |
| Q8ZPD6 YNCE_SALTY Uncharacterized protein yncE    | 21 |                       | LYTTNADGEFITIDT                             | 198 | 15 | 0  | 5.28  |                                                                | 1673.77 | 65.430  | 5043   | 2 | 837.39  | -9.48  |
| P65882 PURA_SALTY Adenylosuccinate synthetase     | 1  | Carbamidomethyl+C(7)  | LLLSEACPLILDYHVALDNAR                       | 97  | 21 | 13 | 81.73 | b2b3y3y6*y6y10y11y12y1<br>4y15*y15y17y21                       | 2396.25 | 91.435  | 34364  | 3 | 799.42  | -5.20  |
| P65882 PURA_SALTY Adenylosuccinate synthetase     | 2  |                       | IEELTGVPIDIISTGPDR                          | 402 | 18 | 5  | 16.15 | b2b4*b4b6y3                                                    | 1925.04 | 102.498 | 25302  | 2 | 963.02  | 8.81   |
| P65882 PURA_SALTY Adenylosuccinate synthetase     | 3  |                       | VLDDTMAVADILTSMVVDVSDLL<br>DQAR             | 186 | 27 | 19 | 61.52 | b2b4b7*b7b10*b10b11y1y<br>5y7*y7y8*y8*y8y10*y10y1<br>1*y11*y11 | 2905.45 | 138.232 | 6714   | 3 | 969.15  | -1.09  |
| P65882 PURA_SALTY Adenylosuccinate synthetase     | 4  | Carbamidomethyl+C(11) | AVQLNSLSGFCLTK                              | 318 | 14 | 4  | 25.4  | b11*b11y9y10                                                   | 1537.80 | 73.889  | 3454   | 2 | 769.40  | -4.84  |
| P65882 PURA_SALTY Adenylosuccinate synthetase     | 5  |                       | YVDYVLGILK                                  | 258 | 10 | 5  | 66.79 | b3b5*b5b7b9                                                    | 1182.69 | 33.036  | 113617 | 3 | 394.90  | 9.29   |
| P65882 PURA_SALTY Adenylosuccinate synthetase     | 6  |                       | TVLHLIPSGILR                                | 50  | 12 | 3  | 26.99 | b9y5y6                                                         | 1318.82 | 76.609  | 11970  | 2 | 659.91  | -2.50  |
| P65882 PURA_SALTY Adenylosuccinate synthetase     | 7  | Carbamidomethyl+C(2)  | LCVAYR                                      | 343 | 6  | 2  | 27.43 | y4y5                                                           | 781.39  | 37.539  | 5030   | 2 | 391.20  | -10.31 |
| P65882 PURA_SALTY Adenylosuccinate synthetase     | 8  |                       | GIGPAYEDK                                   | 132 | 9  | 3  | 31.3  | b6b7y6                                                         | 949.45  | 23.418  | 3080   | 2 | 475.23  | -10.03 |
| P65882 PURA_SALTY Adenylosuccinate synthetase     | 9  |                       | AEAVDYQK                                    | 178 | 8  | 3  | 33.93 | b5y6y7                                                         | 923.45  | 90.742  | 2394   | 1 | 923.45  | 2.05   |
| P65882 PURA_SALTY Adenylosuccinate synthetase     | 10 |                       | LKEVMEYHNFQLVNYYK                           | 161 | 17 | 6  | 35.22 | b7b10y4y9y10*y10                                               | 2218.12 | 72.345  | 656842 | 3 | 740.05  | 9.69   |
| P65882 PURA_SALTY Adenylosuccinate synthetase     | 11 |                       | VLDDTMAVADILTSMVVDVSDLL<br>DQARQR           | 186 | 29 | 4  | 15.1  | b4b9y11y23                                                     | 3189.61 | 109.121 | 12260  | 3 | 1063.88 | 0.31   |
| P65882 PURA_SALTY Adenylosuccinate synthetase     | 12 |                       | EVTTPLAADDWKGVPIYETMP<br>GWSESTFGVK         | 354 | 33 | 6  | 18.6  | b3*b3b10b14y10y14                                              | 3641.76 | 93.017  | 9409   | 3 | 1214.59 | 7.24   |
| P65882 PURA_SALTY Adenylosuccinate synthetase     | 13 |                       | MGNVVVLGTQWGDEGKGK                          | 0   | 19 | 4  | 15.48 | b4b6y7*y7                                                      | 1988.98 | 72.345  | 6697   | 3 | 663.66  | -3.13  |
| P65882 PURA_SALTY Adenylosuccinate synthetase     | 14 |                       | MPDGREVTTTPLAADDWK                          | 349 | 18 | 3  | 25.07 | b6b7b11                                                        | 2002.96 | 92.170  | 5440   | 3 | 668.32  | 2.19   |
| P65882 PURA_SALTY Adenylosuccinate synthetase     | 15 | Phosphoryl STY(9)     | GNNVVVLGTQWGDEGK                            | 1   | 16 | 4  | 17.79 | b9*b9y7y11                                                     | 1752.80 | 71.670  | 10888  | 2 | 876.90  | 5.29   |
| P65882 PURA_SALTY Adenylosuccinate synthetase     | 16 | Oxidation+M(9)        | GVEPIYETMPGWSESTFGVK                        | 367 | 20 | 3  | 14.89 | b11y11y13                                                      | 2230.07 | 86.439  | 16509  | 2 | 1115.54 | 12.48  |
| P65882 PURA_SALTY Adenylosuccinate synthetase     | 17 | Oxidation+M()         | ENVTSIIGNGVVLSPSALMKEMKE<br>LEDR            | 62  | 28 | 5  | 27.36 | b4y4y5y12y21                                                   | 3075.55 | 81.550  | 3886   | 3 | 1025.86 | -6.35  |
| P0A2E1 GLYA_SALTY Serine hydroxymethyltransferase | 1  |                       | SPFVTSGIR                                   | 354 | 9  | 8  | 76.65 | b3y1y3y4y5y6y7y9                                               | 963.52  | 48.592  | 45256  | 2 | 482.26  | -5.00  |
| P0A2E1 GLYA_SALTY Serine hydroxymethyltransferase | 2  |                       | EMNIADYDAELWQAMEQEK                         | 4   | 19 | 12 | 59.73 | b2*b2b3*b3y4y8*y8y9y12y<br>13y15y19                            | 2314.02 | 92.459  | 41989  | 2 | 1157.52 | 10.55  |
| P0A2E1 GLYA_SALTY Serine hydroxymethyltransferase | 3  |                       | VMQAQGSQLTNK                                | 42  | 12 | 10 | 70.58 | b2b3y2y3y4y7y9y10*y10y<br>12                                   | 1304.66 | 29.555  | 40703  | 2 | 652.83  | -2.90  |

|                                                   |    |                       |                                                                 |     |    |    |       |                                |         |         |       |   |         |        |
|---------------------------------------------------|----|-----------------------|-----------------------------------------------------------------|-----|----|----|-------|--------------------------------|---------|---------|-------|---|---------|--------|
| P0A2E1 GLYA_SALTY Serine hydroxymethyltransferase | 4  |                       | AMVEVFLNR                                                       | 296 | 9  | 6  | 46.59 | b2b3y4y5y6y9                   | 1078.56 | 67.844  | 32832 | 2 | 539.78  | -8.49  |
| P0A2E1 GLYA_SALTY Serine hydroxymethyltransferase | 5  | Carbamidomethyl+C(7)  | ELAGWMCDVLDNINDEATIER                                           | 380 | 21 | 8  | 25.5  | b5°b5y1y2y4y5y8y21             | 2464.14 | 101.004 | 28783 | 2 | 1232.57 | 11.39  |
| P0A2E1 GLYA_SALTY Serine hydroxymethyltransferase | 6  |                       | YAEGYPGKR                                                       | 54  | 9  | 8  | 69.14 | b2y1y2y3y4y6y7y8               | 1040.51 | 23.368  | 18165 | 2 | 520.76  | -1.29  |
| P0A2E1 GLYA_SALTY Serine hydroxymethyltransferase | 7  |                       | ELFGADYANVQPHSGSQANFAVY<br>TALLQPGDTVLGMNLAQGGHLT<br>HGSPVNFSGK | 83  | 55 | 5  | 11.56 | b13b15°b15y3y27                | 5683.81 | 96.440  | 13968 | 5 | 1137.57 | 6.87   |
| P0A2E1 GLYA_SALTY Serine hydroxymethyltransferase | 8  |                       | LNSAVFPSAQGGPLMHVIAGK                                           | 251 | 21 | 6  | 36.64 | b3°b3*b3y14y15y16              | 2094.11 | 78.075  | 79705 | 3 | 698.71  | -5.25  |
| P0A2E1 GLYA_SALTY Serine hydroxymethyltransferase | 9  | Carbamidomethyl+C(5)  | VLDICAR                                                         | 405 | 7  | 4  | 54.86 | y3y4y5y6                       | 846.44  | 44.176  | 47280 | 2 | 423.72  | -16.73 |
| P0A2E1 GLYA_SALTY Serine hydroxymethyltransferase | 10 |                       | IGSPAVTR                                                        | 363 | 8  | 6  | 68.77 | y3°y3y4y5y6y7                  | 800.45  | 27.535  | 27244 | 2 | 400.73  | -15.94 |
| P0A2E1 GLYA_SALTY Serine hydroxymethyltransferase | 11 |                       | QEEHIELIASENYTSR                                                | 25  | 17 | 4  | 23.9  | b5y6°y6y7                      | 2015.95 | 95.718  | 2868  | 3 | 672.65  | -8.72  |
| P0A2E1 GLYA_SALTY Serine hydroxymethyltransferase | 12 |                       | MIIGGFSAYSGVVDWAK                                               | 168 | 17 | 3  | 25.57 | y3y12y13                       | 1800.89 | 90.601  | 2663  | 2 | 900.95  | -5.29  |
| P0A2E1 GLYA_SALTY Serine hydroxymethyltransferase | 13 |                       | LYNIVPYGIDESGKIDYDEMAK                                          | 138 | 22 | 5  | 30.04 | b3b4b10y17y20                  | 2533.22 | 76.184  | 72130 | 3 | 845.08  | 0.19   |
| P0A2E1 GLYA_SALTY Serine hydroxymethyltransferase | 14 |                       | NSVPNDPKSPFTSGIR                                                | 346 | 17 | 9  | 54.41 | b3°b3b5b9y8°y8y9y11y14         | 1814.92 | 51.916  | 22305 | 3 | 605.64  | -11.43 |
| P0A2E1 GLYA_SALTY Serine hydroxymethyltransferase | 15 |                       | GFKEAEVK                                                        | 372 | 8  | 4  | 50.47 | b4b6b7y5                       | 907.48  | 60.998  | 3698  | 1 | 907.48  | -9.89  |
| P0A2E1 GLYA_SALTY Serine hydroxymethyltransferase | 16 |                       | EHKPKMIIGGFSAYSGVVDWAK                                          | 163 | 22 | 6  | 44.71 | y9°y9y11y12y13y20              | 2420.24 | 84.363  | 2073  | 4 | 605.81  | -3.13  |
| P0A2E1 GLYA_SALTY Serine hydroxymethyltransferase | 17 | Oxidation+M(15)       | LNSAVFPSAQGGPLMHVIAGK                                           | 251 | 21 | 7  | 30.86 | b3°b3b4°b4b10y3y18             | 2110.09 | 84.395  | 47927 | 3 | 704.04  | -9.49  |
| P0A2E1 GLYA_SALTY Serine hydroxymethyltransferase | 18 | Oxidation+M()         | REMNIADYDAELWQAMEQEK                                            | 3   | 20 | 3  | 14.89 | b7y3y8                         | 2486.13 | 100.945 | 13548 | 3 | 829.38  | 12.28  |
| P0A2E1 GLYA_SALTY Serine hydroxymethyltransferase | 19 |                       | AEGYPGKR                                                        | 55  | 8  | 0  | 1.51  |                                | 877.45  | 23.370  | 5631  | 2 | 439.23  | -6.68  |
| P00929 TRPA_SALTY Tryptophan synthase alpha chain | 1  | Carbamidomethyl+C(9)  | HNIAPIFICPPNADDDLRL                                             | 145 | 19 | 4  | 24.66 | y6y7y12y19                     | 2191.12 | 96.179  | 18325 | 2 | 1096.06 | 9.25   |
| P00929 TRPA_SALTY Tryptophan synthase alpha chain | 2  |                       | HPTIPIGLLMYANLVFNNGIDAFY<br>AR                                  | 91  | 26 | 5  | 23.16 | y1y5y6y10y26                   | 2920.53 | 105.096 | 17844 | 3 | 974.18  | 5.18   |
| P00929 TRPA_SALTY Tryptophan synthase alpha chain | 3  |                       | IIDLIDAGADALELGVPFSDPLAD<br>GPTIQNANLR                          | 35  | 35 | 5  | 17.71 | b14b21b25y5y18                 | 3605.83 | 111.249 | 16128 | 4 | 902.21  | -10.63 |
| P00929 TRPA_SALTY Tryptophan synthase alpha chain | 4  | Carbamidomethyl+C(11) | AFAAGVTPAQCFEMLALIR                                             | 70  | 19 | 7  | 21.55 | b2b3b5y2y12y14y19              | 2066.07 | 101.191 | 16021 | 2 | 1033.54 | 4.49   |
| P00929 TRPA_SALTY Tryptophan synthase alpha chain | 5  |                       | EGAFVPFVTLGDPGIEQSLK                                            | 15  | 20 | 10 | 43.86 | b2b5°b5b8°b8b9b12b16y1<br>5y20 | 2104.11 | 94.035  | 15408 | 2 | 1052.56 | 8.70   |
| P00929 TRPA_SALTY Tryptophan synthase alpha chain | 6  | Carbamidomethyl+C(1)  | CEQVGVDSVLVADVPVEESAPFR                                         | 117 | 23 | 4  | 22.51 | b11b12°b12y11                  | 2502.22 | 83.189  | 1744  | 3 | 834.74  | 0.39   |
| P00929 TRPA_SALTY Tryptophan synthase alpha chain | 7  |                       | EYHAAPALQGFGISSPEQVSAAVR                                        | 201 | 24 | 3  | 22.41 | b18y14y15                      | 2485.24 | 99.416  | 4450  | 3 | 829.08  | -3.05  |
| P00929 TRPA_SALTY Tryptophan synthase alpha chain | 8  |                       | YENLFAQLNDR                                                     | 3   | 11 | 5  | 25.06 | b6°b6b10°b10y5                 | 1382.67 | 54.552  | 3871  | 2 | 691.84  | -2.56  |
| P00929 TRPA_SALTY Tryptophan synthase alpha chain | 9  |                       | AGAAGAISGSAIVK                                                  | 225 | 14 | 3  | 27.74 | b5b7b8                         | 1172.69 | 27.487  | 3234  | 3 | 391.57  | 21.44  |
| P00929 TRPA_SALTY Tryptophan synthase alpha chain | 10 |                       | GYTYLLSRSGVTGAENR                                               | 171 | 17 | 3  | 16.91 | b10b16y7                       | 1843.94 | 86.775  | 6029  | 2 | 922.47  | 3.71   |
| P00929 TRPA_SALTY Tryptophan synthase alpha chain | 11 | Carbamidomethyl+C(1)  | CEQVGVDSVLVADVPVEESAPFR<br>QAALR                                | 117 | 28 | 3  | 12    | b10b18y5                       | 3041.51 | 85.455  | 2346  | 3 | 1014.51 | -7.87  |
| P00929 TRPA_SALTY Tryptophan synthase alpha chain | 12 |                       | ERYENLFAQLNDR                                                   | 1   | 13 | 5  | 35.45 | b3b4y4°y4y6                    | 1667.81 | 60.961  | 1520  | 2 | 834.41  | -1.39  |

|                                                             |    |                       |                                       |     |    |    |       |                                                          |         |         |       |   |         |        |
|-------------------------------------------------------------|----|-----------------------|---------------------------------------|-----|----|----|-------|----------------------------------------------------------|---------|---------|-------|---|---------|--------|
| IP41033 PCKA_SALTY<br>Phohoenolpyruvate carboxykinase [ATP] | 1  |                       | LTANQTQYHFLSGFTAK                     | 371 | 17 | 18 | 85.45 | b2°b2b5*b5b7°b7b8°b8b9y<br>1y2y10y12°y12y14y15y16y<br>17 | 1926.95 | 67.447  | 39806 | 3 | 642.99  | -13.05 |
| IP41033 PCKA_SALTY<br>Phohoenolpyruvate carboxykinase [ATP] | 2  |                       | MQAAGAQAYL VNTGWNGTGKR                | 426 | 21 | 5  | 14.36 | b2b8y12y14y21                                            | 2194.08 | 59.585  | 34026 | 3 | 732.03  | -0.22  |
| IP41033 PCKA_SALTY<br>Phohoenolpyruvate carboxykinase [ATP] | 3  | Carbamidomethyl+C(21) | LIGDDEHGWDDDG VFNFEGGCY<br>AK         | 263 | 24 | 5  | 22.41 | b14y1y6y7y24                                             | 2716.15 | 79.079  | 25719 | 3 | 906.05  | 7.37   |
| IP41033 PCKA_SALTY<br>Phohoenolpyruvate carboxykinase [ATP] | 4  |                       | NMFIRPTDEELVGFKPDFIVMNGA<br>K         | 148 | 25 | 8  | 38.99 | b2b3b5b6y9y10y23y25                                      | 2868.41 | 86.092  | 20727 | 4 | 717.86  | -13.02 |
| IP41033 PCKA_SALTY<br>Phohoenolpyruvate carboxykinase [ATP] | 5  |                       | GVLTNLGAVAVDTGIFTGR                   | 45  | 19 | 9  | 47.35 | y1y2y4y8y9y10°y10y13y19                                  | 1861.02 | 93.507  | 19783 | 2 | 931.02  | 2.75   |
| IP41033 PCKA_SALTY<br>Phohoenolpyruvate carboxykinase [ATP] | 6  |                       | GMFSVMNYLLPLK                         | 212 | 13 | 5  | 26.12 | b2b4y3y4y13                                              | 1512.79 | 108.554 | 17394 | 2 | 756.90  | -0.48  |
| IP41033 PCKA_SALTY<br>Phohoenolpyruvate carboxykinase [ATP] | 7  |                       | AYGINDVQDIVNPSYDTLYQEEL<br>NPGLEGYER  | 12  | 33 | 13 | 56.09 | b2b6°b6b10b12*b12b13y5<br>y7y8y9y11y33                   | 3837.80 | 90.822  | 12176 | 3 | 1279.94 | 5.15   |
| IP41033 PCKA_SALTY<br>Phohoenolpyruvate carboxykinase [ATP] | 8  |                       | IQLIGGTWYGGEMK                        | 197 | 14 | 4  | 39.72 | y5y10y12y13                                              | 1552.78 | 76.043  | 5888  | 2 | 776.89  | -2.75  |
| IP41033 PCKA_SALTY<br>Phohoenolpyruvate carboxykinase [ATP] | 9  | Carbamidomethyl+C(12) | GVTEPTPTFSACFGAAFLTLHPTQ<br>YAEVLVKR  | 394 | 32 | 6  | 17.15 | b2b10°b10b12°b12b14                                      | 3508.74 | 96.491  | 4877  | 4 | 877.94  | -13.92 |
| IP41033 PCKA_SALTY<br>Phohoenolpyruvate carboxykinase [ATP] | 10 |                       | MQAAGAQAYL VNTGWNGTGK                 | 426 | 20 | 5  | 26.08 | b2b10y7y11y12                                            | 2037.99 | 64.438  | 3213  | 2 | 1019.50 | 5.45   |
| IP41033 PCKA_SALTY<br>Phohoenolpyruvate carboxykinase [ATP] | 11 |                       | TTLSTDPK                              | 253 | 8  | 4  | 36.94 | b5°b5y4y6                                                | 862.45  | 35.489  | 6687  | 2 | 431.73  | 2.05   |
| IP41033 PCKA_SALTY<br>Phohoenolpyruvate carboxykinase [ATP] | 12 | Carbamidomethyl+C(8)  | LFIVDAFCGANADTR                       | 116 | 15 | 4  | 26.87 | y4y13y14*y14                                             | 1669.81 | 97.161  | 6083  | 2 | 835.41  | 8.77   |
| IP41033 PCKA_SALTY<br>Phohoenolpyruvate carboxykinase [ATP] | 13 |                       | EQGLNSEN FVAFNLTER                    | 180 | 17 | 5  | 35.22 | b8b9b15y6y10                                             | 1967.95 | 84.184  | 3312  | 3 | 656.65  | 0.68   |
| IP41033 PCKA_SALTY<br>Phohoenolpyruvate carboxykinase [ATP] | 14 |                       | EQGLNSEN FVAFNLTERIQ LIGGT<br>WYGGEMK | 180 | 31 | 5  | 19.61 | b5b13y7y11y13                                            | 3501.71 | 109.129 | 16707 | 3 | 1167.91 | -1.26  |
| IP41033 PCKA_SALTY<br>Phohoenolpyruvate carboxykinase [ATP] | 15 |                       | YTDTPAGEALVSAGPKL                     | 521 | 17 | 4  | 34.62 | b5b10b11b15                                              | 1689.88 | 81.503  | 7154  | 2 | 845.44  | 4.12   |
| IP41033 PCKA_SALTY<br>Phohoenolpyruvate carboxykinase [ATP] | 16 |                       | KGMFSVMNYLLPLK                        | 211 | 14 | 3  | 27.74 | b7b8b10                                                  | 1640.88 | 73.778  | 3686  | 2 | 820.94  | -6.10  |
| IP41033 PCKA_SALTY<br>Phohoenolpyruvate carboxykinase [ATP] | 17 |                       | GDVAVFFGLSGTGK TTLSTDPK               | 239 | 22 | 4  | 21.64 | b13y4y6y13                                               | 2198.12 | 116.138 | 2338  | 3 | 733.38  | -8.00  |
| IP41033 PCKA_SALTY<br>Phohoenolpyruvate carboxykinase [ATP] | 18 | Oxidation+M(1)        | MQAAGAQAYL VNTGWNGTGK                 | 426 | 20 | 3  | 14.89 | b4b9y10                                                  | 2053.98 | 83.841  | 21653 | 2 | 1027.49 | 0.24   |
| IP41033 PCKA_SALTY<br>Phohoenolpyruvate carboxykinase [ATP] | 19 | Oxidation+M(2)        | NMFIRPTDEELVGFKPDFIVMNGA<br>K         | 148 | 25 | 6  | 34.73 | b5b13b14y5y13y15                                         | 2884.47 | 62.789  | 10399 | 5 | 577.70  | 10.41  |
| IP0A1G5 DKSA_SALTY DnaK suppressor<br>protein               | 1  |                       | TVTHMQDEAANFPDPVDR                    | 57  | 18 | 13 | 92.36 | b6b7b10b12y1y4y5°y5y6y<br>7y12y14y18                     | 2042.91 | 55.397  | 33685 | 3 | 681.64  | -8.78  |

|                                                                   |    |                                                     |                                          |     |    |    |       |                               |         |         |       |   |         |        |
|-------------------------------------------------------------------|----|-----------------------------------------------------|------------------------------------------|-----|----|----|-------|-------------------------------|---------|---------|-------|---|---------|--------|
| [P0A1G5]DKSA_SALTY DnaK suppressor protein                        | 2  |                                                     | TSSLSILAAGVEPYQEKPGEEYM<br>NEAQLSHFKR    | 8   | 34 | 4  | 37.21 | y10y11y12y34                  | 3822.89 | 80.523  | 22656 | 4 | 956.48  | -2.11  |
| [P0A1G5]DKSA_SALTY DnaK suppressor protein                        | 3  |                                                     | NQLRDEVDR                                | 48  | 9  | 7  | 31.3  | b1b8y1y3y4°y4y9               | 1144.56 | 28.070  | 15956 | 2 | 572.79  | -5.33  |
| [P0A1G5]DKSA_SALTY DnaK suppressor protein                        | 4  |                                                     | ILEAWR                                   | 42  | 6  | 2  | 27.43 | y3y4                          | 787.44  | 53.199  | 27582 | 2 | 394.22  | -13.56 |
| [P0A1G5]DKSA_SALTY DnaK suppressor protein                        | 5  |                                                     | TSSLSILAAGVEPYQEKPGEEYM<br>NEAQLSHFKR    | 8   | 34 | 3  | 11.12 | b14b18y11                     | 3822.87 | 98.722  | 96220 | 3 | 1274.96 | -8.88  |
| [P0A1G5]DKSA_SALTY DnaK suppressor protein                        | 6  |                                                     | AAQEEEFSLRLNR                            | 75  | 14 | 3  | 19.96 | b10b13y10                     | 1691.82 | 92.463  | 7130  | 2 | 846.41  | -7.86  |
| [P0A1G5]DKSA_SALTY DnaK suppressor protein                        | 7  | Carbamidomethyl+C(11)<br>;Carbamidomethyl+C(14<br>) | RLEARPTADLCIDCK                          | 124 | 15 | 5  | 26.76 | b4°b4b11y6y9                  | 1817.88 | 103.607 | 3443  | 2 | 909.45  | -8.19  |
| [P0A1G5]DKSA_SALTY DnaK suppressor protein                        | 8  |                                                     | MQDEAANFPDPVDR                           | 61  | 14 | 0  | 4.9   |                               | 1604.70 | 55.373  | 2914  | 2 | 802.86  | 1.90   |
| [P15717]LEUC1_SALTY 3-isopropylmalate dehydratase large subunit 1 | 1  |                                                     | THLVSPAMAAAAVTGHFADIR                    | 441 | 22 | 9  | 45.94 | b1b2b3y2y5y6y7y10y12          | 2207.13 | 84.272  | 19083 | 3 | 736.38  | -4.09  |
| [P15717]LEUC1_SALTY 3-isopropylmalate dehydratase large subunit 1 | 2  |                                                     | AGLVAPDETTFNYYVK                         | 229 | 15 | 7  | 58.42 | b3b4b5y4y10y11y15             | 1624.83 | 65.402  | 18298 | 2 | 812.92  | 2.25   |
| [P15717]LEUC1_SALTY 3-isopropylmalate dehydratase large subunit 1 | 3  |                                                     | HLVHEVTSPQAFDGLR                         | 29  | 16 | 10 | 66.08 | b2b8b11*b11y4°y4y5y8y9<br>y10 | 1805.95 | 83.295  | 17122 | 4 | 452.24  | 9.19   |
| [P15717]LEUC1_SALTY 3-isopropylmalate dehydratase large subunit 1 | 4  |                                                     | LFDAHVVFEPNETPLLYIDR                     | 8   | 21 | 3  | 14.36 | b10b14y4                      | 2459.24 | 92.401  | 9726  | 3 | 820.42  | -9.03  |
| [P15717]LEUC1_SALTY 3-isopropylmalate dehydratase large subunit 1 | 5  |                                                     | IEVTGNAAPGITAK                           | 167 | 14 | 3  | 11.36 | b4°b9y8                       | 1341.73 | 36.397  | 4857  | 3 | 447.91  | -7.64  |
| [P15717]LEUC1_SALTY 3-isopropylmalate dehydratase large subunit 1 | 6  |                                                     | IQMQELIK                                 | 80  | 8  | 3  | 36.94 | b4b6y6                        | 1002.55 | 59.260  | 11096 | 2 | 501.78  | -15.22 |
| [P15717]LEUC1_SALTY 3-isopropylmalate dehydratase large subunit 1 | 7  |                                                     | VAPGVQALVVPGSGPVK                        | 366 | 17 | 4  | 24.32 | y7y12y15°y15                  | 1574.93 | 64.418  | 9430  | 2 | 787.97  | 1.01   |
| [P15717]LEUC1_SALTY 3-isopropylmalate dehydratase large subunit 1 | 8  |                                                     | TFATMDHNVSTQTK                           | 56  | 14 | 6  | 19.96 | b6b10°b10y5°y5*y5             | 1580.73 | 37.351  | 4958  | 2 | 790.87  | -2.63  |
| [P15717]LEUC1_SALTY 3-isopropylmalate dehydratase large subunit 1 | 9  |                                                     | ALAYMGLQPGVPLTDVAIDK                     | 321 | 20 | 5  | 23.44 | b3b7b14*b14y10                | 2072.11 | 84.921  | 4695  | 2 | 1036.56 | -1.06  |
| [P15717]LEUC1_SALTY 3-isopropylmalate dehydratase large subunit 1 | 10 |                                                     | AEEIAPQVTWGTNPGQVISVTDIIP<br>DPASFSDPVER | 280 | 36 | 7  | 23.85 | b4°b4b12*b12y4y5y7            | 3835.96 | 102.522 | 3381  | 3 | 1279.32 | 14.70  |
| [P15717]LEUC1_SALTY 3-isopropylmalate dehydratase large subunit 1 | 11 |                                                     | IFIEAGFEWR                               | 393 | 10 | 3  | 27.7  | b7b9y4                        | 1267.64 | 81.997  | 2180  | 2 | 634.32  | -8.96  |
| [P15717]LEUC1_SALTY 3-isopropylmalate dehydratase large subunit 1 | 12 |                                                     | TLYEK                                    | 3   | 5  | 1  | 13.53 | b4                            | 653.35  | 27.824  | 1968  | 1 | 653.35  | 2.34   |
| [P15717]LEUC1_SALTY 3-isopropylmalate dehydratase large subunit 1 | 13 | Carbamidomethyl+C(14)                               | TGSAGGTGHVVEFCGDAIR                      | 190 | 19 | 4  | 29.33 | b8b12y9y10                    | 1890.88 | 47.846  | 1618  | 4 | 473.47  | 0.77   |
| [P15717]LEUC1_SALTY 3-isopropylmalate dehydratase large subunit 1 | 14 | Carbamidomethyl+C(26)                               | ALAYMGLQPGVPLTDVAIDKVFI<br>GSCTNSR       | 321 | 30 | 8  | 35.92 | b6b10y4y7y8°y8y10y22          | 3193.65 | 95.239  | 9053  | 3 | 1065.22 | 2.29   |

|                                                                  |    |                       |                                |     |    |    |        |                                     |         |         |       |   |         |        |
|------------------------------------------------------------------|----|-----------------------|--------------------------------|-----|----|----|--------|-------------------------------------|---------|---------|-------|---|---------|--------|
| P15717 LEUC1_SALTY 3-isopropylmalate dehydratase large subunit 1 | 15 | Carbamidomethyl+C(7)  | LNPGERCASTSNR                  | 417 | 13 | 7  | 64.36  | b7y5°y5y8y9y10y11                   | 1461.70 | 71.640  | 4323  | 2 | 731.35  | 6.35   |
| P15717 LEUC1_SALTY 3-isopropylmalate dehydratase large subunit 1 | 16 |                       | DINASGEMARIQMQELIK             | 70  | 18 | 5  | 27.46  | b5*b5b6b10y12                       | 2047.03 | 80.491  | 3455  | 2 | 1024.02 | -2.39  |
| P15717 LEUC1_SALTY 3-isopropylmalate dehydratase large subunit 1 | 17 | Carbamidomethyl+C(14) | TGSAGGTGHVVEFCDAIRALSM EGR     | 190 | 26 | 8  | 31.44  | b6b8b10°b10b12y6°y6y16              | 2635.23 | 128.571 | 1557  | 3 | 879.08  | -2.78  |
| P63411 ACKA_SALTY Acetate kinase                                 | 1  | Carbamidomethyl+C(19) | FAIIDAVNGDEYLSGLAECFHLPE AR    | 17  | 26 | 14 | 104.38 | b2b3b4y2y3y4y5y10y18y19y21y22y23y26 | 2907.41 | 104.388 | 45338 | 3 | 969.81  | 3.78   |
| P63411 ACKA_SALTY Acetate kinase                                 | 2  | Carbamidomethyl+C(14) | MLNKPVEELNIITCHLGNNGSVSA IR    | 195 | 26 | 7  | 22.27  | b2b10y2y12y13*y13y26                | 2822.44 | 77.362  | 35052 | 4 | 706.36  | -10.12 |
| P63411 ACKA_SALTY Acetate kinase                                 | 3  |                       | LDVVFTGGIGENAAMVR              | 324 | 18 | 6  | 16.15  | b3y1y9*y9y16y18                     | 1819.92 | 93.534  | 33986 | 2 | 910.46  | -12.14 |
| P63411 ACKA_SALTY Acetate kinase                                 | 4  |                       | LGVLGFEVDHER                   | 348 | 12 | 9  | 48.52  | b2b3b9y1y3y5°y5y9y12                | 1370.69 | 55.892  | 33927 | 3 | 457.57  | -9.53  |
| P63411 ACKA_SALTY Acetate kinase                                 | 5  |                       | EGTRPAVVIPTNEELVIAQDASR        | 374 | 23 | 13 | 75.99  | b9b14y2y4y5*y5y6y7y12°y12y14y15y23  | 2465.29 | 68.763  | 31068 | 3 | 822.43  | -4.06  |
| P63411 ACKA_SALTY Acetate kinase                                 | 6  | Carbamidomethyl+C(7)  | LVLVLNCGSSSLK                  | 4   | 13 | 11 | 82.94  | b2b3b4b5y8°y8y9°y9y10y11y13         | 1389.77 | 66.693  | 28919 | 2 | 695.39  | -4.22  |
| P63411 ACKA_SALTY Acetate kinase                                 | 7  |                       | NVAVFDATAFHQTMPEESYLYALP YSLYK | 144 | 28 | 4  | 12     | b13y6y9y28                          | 3297.61 | 98.484  | 16360 | 3 | 1099.88 | 9.92   |
| P63411 ACKA_SALTY Acetate kinase                                 | 8  | Carbamidomethyl+C(1)  | CVDTSMGLTPLEGLVMGTR            | 224 | 19 | 3  | 15.48  | b10b12y15                           | 2036.96 | 81.500  | 1856  | 3 | 679.66  | -11.87 |
| P63411 ACKA_SALTY Acetate kinase                                 | 9  |                       | YGAHGTSHFYVTQEAAK              | 178 | 17 | 4  | 23.83  | b6b8y3y8                            | 1866.84 | 37.176  | 8952  | 4 | 467.47  | -19.49 |
| P63411 ACKA_SALTY Acetate kinase                                 | 10 | Carbamidomethyl+C(14) | ESGLGLTEVTSDCR                 | 272 | 15 | 5  | 32.78  | b3b8°b8y10y11                       | 1636.79 | 59.084  | 2951  | 2 | 818.90  | 0.67   |
| P63411 ACKA_SALTY Acetate kinase                                 | 11 | Carbamidomethyl+C(19) | FAIIDAVNGDEYLSGLAECFHLPE ARIK  | 17  | 28 | 4  | 12     | b10°b10b15y15                       | 3148.61 | 98.134  | 26152 | 4 | 787.91  | 11.71  |
| P63411 ACKA_SALTY Acetate kinase                                 | 12 | Phosphoryl STY(11)    | EGTRPAVVIPTNEELVIAQDASR        | 374 | 23 | 6  | 30.52  | b3°b3b5b6b12y12                     | 2545.29 | 91.418  | 33916 | 3 | 849.10  | 11.61  |
| P63411 ACKA_SALTY Acetate kinase                                 | 13 |                       | TMPEESYLYALPYSLYK              | 155 | 17 | 0  | 8.68   |                                     | 2068.00 | 98.514  | 2714  | 3 | 690.00  | -0.47  |
| P66955 TALB_SALTY Transaldolase B                                | 1  |                       | QFTTVVADTG DIAAMK              | 9   | 16 | 8  | 46.83  | b3b6b11b16y7y12y14y16               | 1667.84 | 67.295  | 25655 | 2 | 834.42  | 3.66   |
| P66955 TALB_SALTY Transaldolase B                                | 2  |                       | LSYDTEASIAK                    | 100 | 11 | 7  | 49.11  | b5b9y5y8y9°y9y11                    | 1197.59 | 44.084  | 21965 | 2 | 599.30  | -4.89  |
| P66955 TALB_SALTY Transaldolase B                                | 3  |                       | LYQPQDATNP SILNAAQIPEYR        | 25  | 24 | 9  | 41.28  | b3b7b12b13y2y4y6y9y24               | 2716.40 | 81.435  | 14244 | 3 | 906.14  | 1.26   |
| P66955 TALB_SALTY Transaldolase B                                | 4  |                       | LTIA PALLK                     | 241 | 9  | 4  | 39.08  | y5y6y7y9                            | 939.61  | 68.762  | 12034 | 2 | 470.31  | -11.76 |
| P66955 TALB_SALTY Transaldolase B                                | 5  |                       | ELAESEGAIER                    | 250 | 11 | 7  | 48.59  | y2y3°y3y7y8y9y11                    | 1203.59 | 36.318  | 11825 | 2 | 602.30  | 0.10   |
| P66955 TALB_SALTY Transaldolase B                                | 6  |                       | LYNDAGISNDR                    | 117 | 11 | 4  | 32.05  | y4y9y10y11                          | 1237.58 | 35.639  | 10565 | 2 | 619.29  | -2.47  |
| P66955 TALB_SALTY Transaldolase B                                | 7  |                       | DYAPAE DPGVSVSTEIYEYYK         | 193 | 21 | 5  | 14.36  | b2b4b13y10°y10                      | 2408.09 | 78.008  | 8861  | 3 | 803.37  | -12.88 |
| P66955 TALB_SALTY Transaldolase B                                | 8  |                       | MIGDLL                         | 311 | 6  | 3  | 30.44  | b3b5°b5                             | 661.35  | 78.426  | 10216 | 1 | 661.35  | -14.58 |
| P66955 TALB_SALTY Transaldolase B                                | 9  |                       | LTSLR                          | 4   | 5  | 1  | 13.53  | y4                                  | 589.37  | 63.464  | 7417  | 1 | 589.37  | 6.84   |
| P66955 TALB_SALTY Transaldolase B                                | 10 | Carbamidomethyl+C(11) | NVGEILELAGCDR                  | 228 | 13 | 4  | 21.35  | b6°b6y6y12                          | 1445.73 | 52.692  | 4218  | 2 | 723.37  | 18.49  |
| P66955 TALB_SALTY Transaldolase B                                | 11 |                       | QQSSDR                         | 60  | 6  | 1  | 13.9   | b3                                  | 720.34  | 62.647  | 1685  | 1 | 720.34  | 12.20  |
| P66955 TALB_SALTY Transaldolase B                                | 12 |                       | ITEAEFLWQH HQDPM AVDKLADG IR   | 275 | 25 | 3  | 19.01  | y3y5y13                             | 2920.40 | 73.904  | 10642 | 4 | 730.86  | -12.71 |

|                                             |    |                       |                                    |     |    |    |        |                                          |         |         |       |   |         |        |
|---------------------------------------------|----|-----------------------|------------------------------------|-----|----|----|--------|------------------------------------------|---------|---------|-------|---|---------|--------|
| P66955 TALB_SALTY Transaldolase B           | 13 |                       | LYQPQDATTNPSLILNAAQIPEYR<br>K      | 25  | 25 | 7  | 43.44  | b8°b8b10b11b13b14y10                     | 2844.48 | 99.380  | 10176 | 3 | 948.83  | -3.35  |
| P66955 TALB_SALTY Transaldolase B           | 14 |                       | QQSSDRAQQVV DATDK                  | 60  | 16 | 6  | 46.9   | b10y5y6y9*y9y10                          | 1775.86 | 62.346  | 2624  | 3 | 592.63  | 7.01   |
| Q7CR64 YAEH_SALTY UPF0325 protein<br>yaeH   | 1  |                       | TVVADGIGQGYKEVQEISPNLR             | 55  | 22 | 7  | 25     | b2b5°b5y7y9y10y22                        | 2373.23 | 71.515  | 25686 | 3 | 791.75  | -5.35  |
| Q7CR64 YAEH_SALTY UPF0325 protein<br>yaeH   | 2  |                       | SELDLKR                            | 91  | 7  | 3  | 38.33  | b5y4y5                                   | 860.48  | 28.994  | 11083 | 2 | 430.74  | -6.17  |
| Q7CR64 YAEH_SALTY UPF0325 protein<br>yaeH   | 3  |                       | SLGITNPEEIDR                       | 6   | 12 | 6  | 23.01  | b3°b3b5y2y6°y6                           | 1343.68 | 54.645  | 9642  | 2 | 672.34  | -0.91  |
| Q7CR64 YAEH_SALTY UPF0325 protein<br>yaeH   | 4  |                       | TVVADGIGQGYK                       | 55  | 12 | 7  | 37.21  | b6°b6b8y8°y8y9°y9                        | 1207.63 | 43.938  | 3220  | 2 | 604.32  | -4.95  |
| Q7CR64 YAEH_SALTY UPF0325 protein<br>yaeH   | 5  | Carbamidomethyl+C(10) | YVIDELDQICQR                       | 77  | 12 | 4  | 23.01  | b10y5y10°y10                             | 1551.77 | 63.898  | 30270 | 2 | 776.39  | 13.77  |
| Q7CR64 YAEH_SALTY UPF0325 protein<br>yaeH   | 6  |                       | ILDDLRL                            | 99  | 6  | 1  | 13.9   | b5                                       | 744.42  | 51.641  | 12840 | 1 | 744.42  | -7.87  |
| Q7CR64 YAEH_SALTY UPF0325 protein<br>yaeH   | 7  |                       | TVVADGIGQGYKEVQEISPNLR             | 55  | 22 | 3  | 13.9   | b10b13y18                                | 2373.25 | 78.119  | 29398 | 3 | 791.76  | 5.56   |
| Q7CR64 YAEH_SALTY UPF0325 protein<br>yaeH   | 8  |                       | SLGITNPEEIDRYSLR                   | 6   | 16 | 4  | 26.16  | b3°b3b11b12                              | 1862.94 | 56.515  | 22227 | 3 | 621.65  | -9.83  |
| Q7CR64 YAEH_SALTY UPF0325 protein<br>yaeH   | 9  |                       | YSLRQEANNDILK                      | 18  | 13 | 4  | 21.35  | b7y4y10°y10                              | 1563.81 | 62.882  | 5075  | 2 | 782.41  | -2.50  |
| Q7CR64 YAEH_SALTY UPF0325 protein<br>yaeH   | 10 |                       | MYDNLKSLGITNPEEIDR                 | 0   | 18 | 3  | 23.55  | b11b12y7                                 | 2108.04 | 75.430  | 4277  | 3 | 703.35  | 1.16   |
| Q7CR64 YAEH_SALTY UPF0325 protein<br>yaeH   | 11 |                       | YDNLKSLGITNPEEIDR                  | 1   | 17 | 3  | 16.91  | b5y6y8                                   | 1977.01 | 109.951 | 3412  | 3 | 659.67  | 8.95   |
| Q7CR64 YAEH_SALTY UPF0325 protein<br>yaeH   | 12 |                       | HLESVVANKISEI EADLDK               | 105 | 19 | 3  | 24.66  | y10y11y13                                | 2110.07 | 64.939  | 2690  | 3 | 704.03  | -14.69 |
| Q56073 DNAK_SALTY Chaperone<br>protein dnaK | 1  |                       | IINEPTAAALAYGLDKEVGNR              | 167 | 21 | 13 | 87.75  | b2b3b4*y5y9y10°y10y11y<br>12y14y17y19y21 | 2215.15 | 74.823  | 53447 | 3 | 739.06  | -8.60  |
| Q56073 DNAK_SALTY Chaperone<br>protein dnaK | 2  |                       | MQELAQVSQK                         | 587 | 10 | 10 | 75.27  | b2b3b7°b7°b7y3y4y6y8y1<br>0              | 1161.59 | 36.866  | 42127 | 2 | 581.30  | 0.95   |
| Q56073 DNAK_SALTY Chaperone<br>protein dnaK | 3  |                       | TAEDYLGEVPTEAVITVPAYFNDA<br>QR     | 125 | 26 | 13 | 42.42  | b1b2b4b8b13b16°b16y1y5<br>*y5y8y9y26     | 2869.39 | 93.490  | 34275 | 3 | 957.14  | 1.45   |
| Q56073 DNAK_SALTY Chaperone<br>protein dnaK | 4  |                       | ASSGLNEEEIQK                       | 502 | 12 | 14 | 100.07 | b4b5y3y4°y4*y4y7°y7*y7y<br>8°y8y9y10y12  | 1304.62 | 34.467  | 27991 | 2 | 652.81  | -8.33  |
| Q56073 DNAK_SALTY Chaperone<br>protein dnaK | 5  |                       | NDPLAMQR                           | 253 | 8  | 12 | 68.77  | b2b4b6b8°b8y2*y2y3*y3y<br>4y6y8          | 944.45  | 38.778  | 13975 | 2 | 472.73  | -10.40 |
| Q56073 DNAK_SALTY Chaperone<br>protein dnaK | 6  |                       | TFEVLATNGDTHLGGEDFDTR              | 214 | 21 | 4  | 14.36  | b3b17y4y21                               | 2295.04 | 64.756  | 12623 | 4 | 574.52  | -3.40  |
| Q56073 DNAK_SALTY Chaperone<br>protein dnaK | 7  |                       | HSQVFSTAEDNQSAVTIHVLQGE<br>R       | 421 | 24 | 7  | 13.11  | b1b2b11y3°y3y5y24                        | 2653.27 | 59.722  | 5210  | 3 | 885.10  | -8.56  |
| Q56073 DNAK_SALTY Chaperone<br>protein dnaK | 8  |                       | IAGLEVK                            | 159 | 7  | 3  | 38.33  | b3y5y6                                   | 729.44  | 44.056  | 3297  | 2 | 365.22  | -13.56 |
| Q56073 DNAK_SALTY Chaperone<br>protein dnaK | 9  |                       | QAVTNPQNTLFAIK                     | 56  | 14 | 3  | 19.96  | b5y3y10                                  | 1544.86 | 65.184  | 15567 | 2 | 772.94  | 14.07  |
| Q56073 DNAK_SALTY Chaperone<br>protein dnaK | 10 |                       | NQGDHLLHSTR                        | 536 | 11 | 4  | 51.6   | y3y4y5y6                                 | 1277.61 | 24.221  | 12467 | 3 | 426.54  | -17.58 |
| Q56073 DNAK_SALTY Chaperone<br>protein dnaK | 11 |                       | FQDEEVQR                           | 76  | 8  | 3  | 33.93  | b6b7y7                                   | 1050.47 | 89.039  | 5406  | 2 | 525.74  | -13.48 |
| Q56073 DNAK_SALTY Chaperone<br>protein dnaK | 12 | Carbamidomethyl+C(12) | IIGIDLGTTNSCVAIMDGTQAR             | 3   | 22 | 3  | 13.9   | b12y7y10                                 | 2306.18 | 79.185  | 5272  | 2 | 1153.59 | 13.87  |
| Q56073 DNAK_SALTY Chaperone<br>protein dnaK | 13 |                       | GMPQIEVTFDIDADGILHVS AK            | 467 | 22 | 4  | 13.9   | b11°b11y10y16                            | 2356.21 | 96.420  | 2586  | 3 | 786.08  | 10.88  |
| Q56073 DNAK_SALTY Chaperone<br>protein dnaK | 14 |                       | AKLES LVEDLVNR                     | 302 | 13 | 3  | 26.12  | b6y4y5                                   | 1485.82 | 80.282  | 23250 | 2 | 743.41  | -3.70  |
| Q56073 DNAK_SALTY Chaperone<br>protein dnaK | 15 |                       | SIEPLKVALQDAGLSVSDINDVILV<br>GGQTR | 315 | 30 | 7  | 36.22  | b3b4°b4y4y5*y5y7                         | 3107.70 | 106.440 | 22146 | 3 | 1036.57 | 1.73   |

|                                                             |    |                       |                                           |     |    |    |        |                                                      |         |         |        |   |        |        |
|-------------------------------------------------------------|----|-----------------------|-------------------------------------------|-----|----|----|--------|------------------------------------------------------|---------|---------|--------|---|--------|--------|
| Q56073 DNAK_SALTY Chaperone protein dnaK                    | 16 |                       | TTPSIIAYTQDGETLVGQPAKR                    | 34  | 22 | 3  | 13.9   | b7y4y20                                              | 2346.22 | 68.079  | 16391  | 3 | 782.75 | -3.02  |
| Q56073 DNAK_SALTY Chaperone protein dnaK                    | 17 |                       | TAEDYLGEPVTEAVITVPAYFNDAQRQATK            | 125 | 30 | 3  | 17.53  | b12b16b22                                            | 3297.62 | 95.287  | 12206  | 4 | 825.16 | -1.70  |
| Q56073 DNAK_SALTY Chaperone protein dnaK                    | 18 |                       | NDPLAMQRLK                                | 253 | 10 | 4  | 34.69  | b3°b3b4b9                                            | 1185.65 | 39.749  | 11096  | 2 | 593.33 | 8.65   |
| Q56073 DNAK_SALTY Chaperone protein dnaK                    | 19 |                       | DQGIDLRNDPLAMQR                           | 246 | 15 | 4  | 26.87  | b4°b4b5b11                                           | 1741.86 | 49.139  | 4228   | 3 | 581.29 | -1.40  |
| Q56073 DNAK_SALTY Chaperone protein dnaK                    | 20 | Carbamidomethyl+C(12) | IIGIDLGTNTNSCVAIMDGTQARVLENAEGDR          | 3   | 31 | 5  | 26.04  | b21y4y5y12y18                                        | 3289.62 | 117.135 | 1823   | 4 | 823.16 | 0.52   |
| Q56073 DNAK_SALTY Chaperone protein dnaK                    | 21 | Phosphoryl STY(15)    | IELSSAQQTVDNLPYITADATGPK                  | 270 | 24 | 11 | 39.64  | b8°b8*b8b9°b9b11°b11*b11y6y9y10                      | 2612.22 | 50.497  | 22192  | 3 | 871.41 | -8.22  |
| Q56073 DNAK_SALTY Chaperone protein dnaK                    | 22 | Phosphoryl STY(9)     | QAVTNPQNTLFAIKR                           | 56  | 15 | 5  | 42.44  | b3b8b10_H3PO4b10b13*b13                              | 1780.92 | 81.500  | 12217  | 2 | 890.96 | 11.58  |
| Q56073 DNAK_SALTY Chaperone protein dnaK                    | 23 |                       | HSQVFSTAEDNQSAVTIHVLQGE                   | 421 | 23 | 2  | 12.38  | y13y17                                               | 2497.20 | 59.748  | 241810 | 3 | 833.07 | 1.47   |
| P0A7Z7 RPOA_SALTY DNA-directed RNA polymerase subunit alpha | 1  | Carbamidomethyl+C(27) | SGIGPVTAAADITHDGDVEIVKPQH VICHLTDENASISMR | 104 | 39 | 11 | 29.89  | b2°b2b3b12y3y8y10y11°y11*y11y35                      | 4183.00 | 72.492  | 71109  | 5 | 837.41 | -12.02 |
| P0A7Z7 RPOA_SALTY DNA-directed RNA polymerase subunit alpha | 2  |                       | SLTEIKDVLASR                              | 298 | 12 | 7  | 51.03  | b4y2y3y5y6y7y12                                      | 1331.74 | 62.634  | 57709  | 2 | 666.37 | -8.71  |
| P0A7Z7 RPOA_SALTY DNA-directed RNA polymerase subunit alpha | 3  |                       | VTLEPLER                                  | 25  | 8  | 8  | 50.47  | b1b7y1y2y4y5y6y8                                     | 956.53  | 51.855  | 38981  | 2 | 478.77 | -10.08 |
| P0A7Z7 RPOA_SALTY DNA-directed RNA polymerase subunit alpha | 4  | Carbamidomethyl+C(6)  | LLVDACYSPVER                              | 170 | 12 | 10 | 96.09  | b2b3b6y4y5y7y9y10y11y12                              | 1421.71 | 59.215  | 37183  | 2 | 711.36 | -1.89  |
| P0A7Z7 RPOA_SALTY DNA-directed RNA polymerase subunit alpha | 5  | Carbamidomethyl+C(9)  | ILLSSMPGCAVTEVEIDGVLHEYS TK               | 45  | 26 | 10 | 54.32  | b2b3b6y5y8y12y15y20y24y26                            | 2848.41 | 90.744  | 30686  | 3 | 950.14 | 1.11   |
| P0A7Z7 RPOA_SALTY DNA-directed RNA polymerase subunit alpha | 6  |                       | EGVQEDILEILLNLK                           | 71  | 15 | 21 | 130.81 | b2°b2b3b4°b4b8*b8b9*b9b10°b10*b10y1y2y3y4y5y6y7y8y15 | 1725.96 | 121.877 | 26564  | 2 | 863.48 | -0.42  |
| P0A7Z7 RPOA_SALTY DNA-directed RNA polymerase subunit alpha | 7  |                       | LVIEMETNGTIDPEEAIR                        | 200 | 18 | 4  | 16.15  | b9*b9b12y10                                          | 2030.04 | 83.348  | 23939  | 3 | 677.35 | 14.07  |
| P0A7Z7 RPOA_SALTY DNA-directed RNA polymerase subunit alpha | 8  |                       | MQGSVTEFLKPR                              | 0   | 12 | 4  | 45.96  | y3y4y5y7                                             | 1392.70 | 58.692  | 43408  | 3 | 464.91 | -18.93 |
| P0A7Z7 RPOA_SALTY DNA-directed RNA polymerase subunit alpha | 9  |                       | LVDIEQVSSTHAK                             | 12  | 13 | 4  | 42.36  | y4y7y11y12                                           | 1426.73 | 45.158  | 39664  | 3 | 476.25 | -15.14 |
| P0A7Z7 RPOA_SALTY DNA-directed RNA polymerase subunit alpha | 10 |                       | AEAIHYIGDLVQR                             | 271 | 13 | 5  | 33.32  | b5y4*y4y8y9                                          | 1484.76 | 62.402  | 36819  | 3 | 495.59 | -16.03 |
| P0A7Z7 RPOA_SALTY DNA-directed RNA polymerase subunit alpha | 11 |                       | IHSEEDERPIGR                              | 158 | 12 | 3  | 33.22  | y4y6y10                                              | 1437.68 | 24.083  | 24605  | 3 | 479.90 | -16.81 |
| P0A7Z7 RPOA_SALTY DNA-directed RNA polymerase subunit alpha | 12 |                       | EEKPEFDPILLRPVDDLELTVR                    | 243 | 22 | 6  | 30.14  | b5°b5b6°b6b10b19                                     | 2623.35 | 90.210  | 13961  | 4 | 656.59 | -17.96 |
| P0A7Z7 RPOA_SALTY DNA-directed RNA polymerase subunit alpha | 13 |                       | QPEVK                                     | 238 | 5  | 1  | 13.53  | b3                                                   | 600.34  | 30.710  | 12620  | 1 | 600.34 | 6.71   |
| P0A7Z7 RPOA_SALTY DNA-directed RNA polymerase subunit alpha | 14 |                       | GYVPASTR                                  | 150 | 8  | 3  | 36.94  | b3b7y6                                               | 850.46  | 46.513  | 6172   | 2 | 425.73 | 19.52  |



|                                                             |    |                       |                                            |     |    |    |       |                                  |         |         |        |   |         |        |
|-------------------------------------------------------------|----|-----------------------|--------------------------------------------|-----|----|----|-------|----------------------------------|---------|---------|--------|---|---------|--------|
| P0A7Z7 RPOA_SALTY DNA-directed RNA polymerase subunit alpha | 15 |                       | GFGHTLGNALR                                | 33  | 11 | 3  | 25.06 | b6b9y9                           | 1142.60 | 47.788  | 2579   | 2 | 571.80  | -7.05  |
| P0A7Z7 RPOA_SALTY DNA-directed RNA polymerase subunit alpha | 16 | Carbamidomethyl+C(10) | RILLSSMPGCAVTEVEIDGVLHEY<br>STK            | 44  | 27 | 10 | 61.75 | b10b11y4y6y7y9°y9y10°y10y14      | 3004.49 | 114.058 | 131746 | 4 | 751.88  | -6.09  |
| P0A7Z7 RPOA_SALTY DNA-directed RNA polymerase subunit alpha | 17 |                       | VEQRTDLDK                                  | 191 | 9  | 4  | 31.3  | b3b8°b8y8                        | 1103.58 | 41.137  | 6287   | 2 | 552.29  | 5.64   |
| P0A7Z7 RPOA_SALTY DNA-directed RNA polymerase subunit alpha | 18 |                       | GRGYVPASTR                                 | 148 | 10 | 4  | 44.23 | b3b4b5y5                         | 1063.56 | 23.866  | 3640   | 2 | 532.29  | -0.11  |
| P0A7Z7 RPOA_SALTY DNA-directed RNA polymerase subunit alpha | 19 |                       | GLSLGMRLNWPPASIADE                         | 310 | 19 | 4  | 24.5  | b11b13b17y11                     | 2056.03 | 112.012 | 1696   | 2 | 1028.52 | 7.24   |
| P0A7Z7 RPOA_SALTY DNA-directed RNA polymerase subunit alpha | 20 | Phosphoryl STY(10)    | LVIEMETNGTIDPEEAI RR                       | 200 | 19 | 3  | 15.48 | b8b11y10                         | 2266.07 | 67.383  | 5206   | 3 | 756.03  | 2.05   |
| P55900 SERC_SALTY Phohoserine aminotransferase              | 1  |                       | GKEFIQVAEEAEQDFRDL LNIPSN<br>YK            | 42  | 26 | 9  | 42.19 | b2b5b6y3y5*y5y6y12y26            | 3053.50 | 113.291 | 37317  | 4 | 764.13  | -7.84  |
| P55900 SERC_SALTY Phohoserine aminotransferase              | 2  |                       | ASIYNAMPIEGVK                              | 335 | 13 | 6  | 33.32 | b5y1y7y9y10y13                   | 1392.72 | 64.622  | 36904  | 2 | 696.86  | 0.09   |
| P55900 SERC_SALTY Phohoserine aminotransferase              | 3  |                       | AQVFNFSSGPAMLPAEVLK                        | 1   | 19 | 11 | 72.6  | b3b5*b5b9b13y3y6y13y15<br>y16y19 | 2006.05 | 91.358  | 35596  | 2 | 1003.53 | 5.35   |
| P55900 SERC_SALTY Phohoserine aminotransferase              | 4  |                       | TTADYVDAGYWAASAIKEAK                       | 91  | 20 | 3  | 14.89 | b4y12y15                         | 2131.05 | 93.078  | 20289  | 3 | 711.02  | 5.50   |
| P55900 SERC_SALTY Phohoserine aminotransferase              | 5  |                       | ALTD F MIDFER                              | 348 | 11 | 7  | 42.39 | b2b5b6°b6y4°y4y5                 | 1357.65 | 90.246  | 14908  | 2 | 679.33  | 1.35   |
| P55900 SERC_SALTY Phohoserine aminotransferase              | 6  |                       | GKEFIQVAEEAEQDFR                           | 42  | 16 | 4  | 17.79 | b13y3y7y16                       | 1895.93 | 52.317  | 9296   | 3 | 632.65  | 9.98   |
| P55900 SERC_SALTY Phohoserine aminotransferase              | 7  |                       | EFIQVAEEAEQDFRDL LNIPSNYK                  | 44  | 24 | 5  | 19.42 | b2°b2y5y13y19                    | 2868.43 | 117.936 | 6674   | 3 | 956.81  | 7.06   |
| P55900 SERC_SALTY Phohoserine aminotransferase              | 8  | Carbamidomethyl+C(7)  | LAQQELCDWHGLGTSVMEISHR                     | 20  | 22 | 3  | 13.9  | b9y3y5                           | 2567.18 | 118.585 | 5854   | 3 | 856.40  | -13.41 |
| P55900 SERC_SALTY Phohoserine aminotransferase              | 9  | Carbamidomethyl+C(5)  | AHESCPSILDYTVLNDNDSMFNT P<br>PTFAWYLSGLVFK | 217 | 37 | 5  | 10.93 | b2b3b8y2y6                       | 4250.04 | 124.056 | 3576   | 3 | 1417.35 | 11.95  |
| P55900 SERC_SALTY Phohoserine aminotransferase              | 10 |                       | YGVIIYAGA QK                               | 188 | 10 | 3  | 27.7  | b3y4y6                           | 1069.56 | 43.039  | 25089  | 2 | 535.28  | -6.39  |
| P55900 SERC_SALTY Phohoserine aminotransferase              | 11 |                       | MAQVFNFSSGPAMLPAEVLK                       | 0   | 20 | 5  | 38.56 | b4b5b6b10°b10                    | 2137.12 | 90.135  | 4799   | 2 | 1069.07 | 19.88  |
| P55900 SERC_SALTY Phohoserine aminotransferase              | 12 |                       | AVKPMR                                     | 129 | 6  | 1  | 13.9  | y3                               | 701.42  | 54.633  | 4777   | 1 | 701.42  | 10.09  |
| P55900 SERC_SALTY Phohoserine aminotransferase              | 13 |                       | EFIQVAEEAEQDFR                             | 44  | 14 | 4  | 31.73 | b3y3y4y6                         | 1710.80 | 37.886  | 2725   | 3 | 570.94  | 0.50   |
| P55900 SERC_SALTY Phohoserine aminotransferase              | 14 |                       | VFLEESFAAGLHALK                            | 311 | 15 | 4  | 30.4  | b5b6b14y13                       | 1631.85 | 62.846  | 2631   | 3 | 544.62  | -19.82 |
| P55900 SERC_SALTY Phohoserine aminotransferase              | 15 |                       | AELLYGVIDNSDFYR                            | 272 | 15 | 3  | 18.79 | b3b11y3                          | 1774.85 | 53.244  | 2250   | 3 | 592.29  | -6.67  |
| P55900 SERC_SALTY Phohoserine aminotransferase              | 16 | Carbamidomethyl+C(3)  | KYCAPQIIDAK                                | 111 | 11 | 3  | 32.05 | b7b8b10                          | 1306.67 | 66.396  | 77825  | 2 | 653.84  | -9.53  |
| P55900 SERC_SALTY Phohoserine aminotransferase              | 17 |                       | TTADYVDAGYWAASAIKEAK                       | 91  | 20 | 3  | 14.89 | b6b8y4                           | 2131.03 | 100.872 | 41699  | 3 | 711.01  | -2.29  |
| P55900 SERC_SALTY Phohoserine aminotransferase              | 18 |                       | GQFAGVPLNLLGDKTTADYVDA<br>GYWAASAIK        | 77  | 31 | 4  | 16.71 | b25y14y16y25                     | 3212.64 | 96.882  | 34242  | 3 | 1071.55 | 3.50   |
| P55900 SERC_SALTY Phohoserine aminotransferase              | 19 |                       | SRMNVFPQLADNTLDK                           | 295 | 16 | 4  | 17.79 | b8*b8y7y10                       | 1848.91 | 121.179 | 30490  | 2 | 924.96  | -6.93  |
| P55900 SERC_SALTY Phohoserine aminotransferase              | 20 |                       | MNVFPQLADNTLDKV FLEESFAA<br>GLHALK         | 297 | 29 | 6  | 20.78 | b3b12*b12y3y12y26                | 3218.63 | 108.266 | 30327  | 4 | 805.41  | -9.25  |

|                                                |    |                       |                               |     |    |    |       |                                    |         |         |       |   |         |        |
|------------------------------------------------|----|-----------------------|-------------------------------|-----|----|----|-------|------------------------------------|---------|---------|-------|---|---------|--------|
| P55900 SERC_SALTY Phohoserine aminotransferase | 21 |                       | AELLYGVIDNSDFYRNDVAQANR       | 272 | 23 | 8  | 44.04 | y6y7y10y13°y13y14°y14*y14          | 2643.28 | 79.053  | 19754 | 3 | 881.77  | 1.75   |
| P55900 SERC_SALTY Phohoserine aminotransferase | 22 | Carbamidomethyl+C(7)  | LAQQLCDWHGLGTSVMEISHRGK       | 20  | 24 | 3  | 13.11 | b3y12y14                           | 2752.33 | 92.875  | 12534 | 3 | 918.12  | 0.89   |
| P55900 SERC_SALTY Phohoserine aminotransferase | 23 |                       | INQQKAELLYGVIDNSDFYR          | 267 | 20 | 3  | 23.02 | b3b4y8                             | 2386.20 | 114.048 | 4643  | 3 | 796.07  | -2.66  |
| Q8ZL56 GPMI_SALTY 2                            | 1  |                       | TFFANPVLTNADVQAK              | 91  | 16 | 11 | 47.5  | b1°b1b3°b3b5b9y2y7y8y11y16         | 1735.90 | 76.445  | 27479 | 2 | 868.46  | 1.20   |
| Q8ZL56 GPMI_SALTY 2                            | 2  |                       | LSDIAPTMLSLMGMEIPQEMTGKPLFIVE | 485 | 29 | 13 | 41.07 | b2b3°b3b4b5°b5b10°b10b12y1y2y13y29 | 3191.62 | 121.070 | 17261 | 3 | 1064.55 | 4.05   |
| Q8ZL56 GPMI_SALTY 2                            | 3  | Carbamidomethyl+C(8)  | AVEALDNCIEQVTK                | 416 | 14 | 7  | 21.42 | b2y1y9*y9y10*y10y14                | 1589.79 | 61.078  | 16555 | 2 | 795.40  | 4.84   |
| Q8ZL56 GPMI_SALTY 2                            | 4  |                       | TPVMDALWAK                    | 31  | 10 | 7  | 42.47 | b2y2y3y6°y6y8y10                   | 1131.58 | 71.259  | 14880 | 2 | 566.29  | -4.32  |
| Q8ZL56 GPMI_SALTY 2                            | 5  |                       | QMGNSEVGHVNLGAGR              | 59  | 16 | 3  | 17.79 | b3y6y9                             | 1625.76 | 41.704  | 7147  | 3 | 542.59  | -12.09 |
| Q8ZL56 GPMI_SALTY 2                            | 6  |                       | VATYDLQPEMSSAELTEK            | 364 | 18 | 4  | 16.15 | b10y8°y8y11                        | 2011.97 | 90.252  | 3500  | 2 | 1006.49 | 9.95   |
| Q8ZL56 GPMI_SALTY 2                            | 7  |                       | YAHVTFFFNGGVVEPFAGEER         | 336 | 21 | 7  | 52.47 | y2y3y5°y5y6y7y8                    | 2403.12 | 95.252  | 2790  | 3 | 801.71  | 6.81   |
| Q8ZL56 GPMI_SALTY 2                            | 8  | Carbamidomethyl+C(6)  | YDTIICNYPNGDMVGHTGVMEAAIK     | 391 | 25 | 3  | 19.01 | b3b7b9                             | 2769.28 | 109.555 | 4641  | 3 | 923.76  | 2.64   |
| Q8ZL56 GPMI_SALTY 2                            | 9  |                       | IYLHAFLDGR                    | 145 | 10 | 3  | 34.69 | y3y5y6                             | 1204.63 | 52.318  | 4167  | 3 | 402.21  | -17.33 |
| Q8ZL56 GPMI_SALTY 2                            | 10 |                       | RPHTLIDASGLEVGLPDR            | 41  | 18 | 3  | 16.15 | b10y3y5                            | 1946.03 | 113.185 | 4066  | 2 | 973.52  | -9.66  |
| Q8ZL56 GPMI_SALTY 2                            | 11 |                       | VVNLNFVMLTEYAADIK             | 286 | 17 | 4  | 23.9  | b8y5y6°y6                          | 1939.99 | 92.074  | 3394  | 2 | 970.50  | -15.04 |
| Q8ZL56 GPMI_SALTY 2                            | 12 |                       | DPATGQAHTAHTNLPVPLIYVGEK      | 452 | 24 | 3  | 13.11 | b3b6y5                             | 2529.30 | 108.444 | 1910  | 3 | 843.77  | -3.47  |
| Q8ZL56 GPMI_SALTY 2                            | 13 |                       | TAVAYPPASLANTFGEWMAKN DK      | 303 | 23 | 4  | 18.23 | b7b11y7y12                         | 2482.22 | 68.780  | 60419 | 3 | 828.08  | 3.64   |
| Q8ZL56 GPMI_SALTY 2                            | 14 |                       | ERTFFANPVLTNADVQAK            | 89  | 18 | 5  | 22.62 | b6b8y4y8*y8                        | 2021.06 | 103.544 | 9837  | 2 | 1011.04 | 9.66   |
| Q8ZL56 GPMI_SALTY 2                            | 15 |                       | EEQQDNAILNAKTPVMDALWAK        | 19  | 22 | 5  | 35.43 | b9b11b13y6y7                       | 2485.25 | 81.537  | 7584  | 2 | 1243.13 | 5.21   |
| Q8ZL56 GPMI_SALTY 2                            | 16 |                       | TFFANPVLTNADVQAKNAGK          | 91  | 20 | 3  | 23.02 | b4b5y11                            | 2106.09 | 62.902  | 6992  | 4 | 527.28  | -3.13  |
| Q8ZL56 GPMI_SALTY 2                            | 17 |                       | DTPPRSAAESLK                  | 155 | 12 | 5  | 37.21 | b9°b9b11y6y7                       | 1271.65 | 38.333  | 2636  | 3 | 424.55  | -9.89  |
| Q8ZL56 GPMI_SALTY 2                            | 18 |                       | EITRAFVNADFDGFAR              | 268 | 16 | 4  | 24.32 | b3°b3b4y8                          | 1828.91 | 39.181  | 2002  | 3 | 610.31  | 6.54   |
| Q8ZL56 GPMI_SALTY 2                            | 19 | Phosphoryl STY(20)    | DPATGQAHTAHTNLPVPLIYVGEK      | 452 | 24 | 6  | 43.53 | b15_H3PO4<br>b15b16y3y4y9y12       | 2609.26 | 101.258 | 2585  | 3 | 870.42  | -2.62  |
| P65692 K6PF_SALTY 6-phohofructokinase          | 1  | Carbamidomethyl+C(1)  | CVGIQNEQLVHHDIIDA IENMK       | 283 | 22 | 13 | 71.38 | b1b2b3b4y3y4y5y7°y7*y7y11y12y22    | 2576.23 | 80.848  | 30532 | 4 | 644.81  | -12.98 |
| P65692 K6PF_SALTY 6-phohofructokinase          | 2  |                       | IGVLTSGGDAPGMNAAIR            | 4   | 18 | 6  | 41.86 | b3y8y12y13y14y18                   | 1699.88 | 61.995  | 21379 | 2 | 850.44  | 1.51   |
| P65692 K6PF_SALTY 6-phohofructokinase          | 3  |                       | ISIVEVMGR                     | 163 | 9  | 3  | 39.08 | y5y6y7                             | 1003.55 | 67.845  | 20143 | 2 | 502.28  | -8.33  |
| P65692 K6PF_SALTY 6-phohofructokinase          | 4  | Carbamidomethyl+C(11) | HAIVAITEHMCDDVDELAHFIEK       | 215 | 22 | 5  | 30.14 | y1y6y9y10y12                       | 2578.21 | 81.446  | 11779 | 4 | 645.31  | -14.39 |
| P65692 K6PF_SALTY 6-phohofructokinase          | 5  |                       | AALTEGLEVMGIYDGYLGLYEDR       | 26  | 23 | 9  | 49.76 | b6b15y5°y5y6y7y11°y11y15           | 2548.17 | 81.545  | 46170 | 3 | 850.06  | -20.89 |
| P65692 K6PF_SALTY 6-phohofructokinase          | 6  |                       | MGAYAIDL LLEGHGGR             | 267 | 16 | 5  | 43.89 | b3y4y5y6y10                        | 1672.82 | 81.645  | 14140 | 3 | 558.28  | -15.83 |
| P65692 K6PF_SALTY 6-phohofructokinase          | 7  |                       | ATVLGHIQR                     | 244 | 9  | 3  | 39.08 | y3y5y6                             | 994.58  | 35.975  | 6129  | 2 | 497.79  | -4.05  |
| P65692 K6PF_SALTY 6-phohofructokinase          | 8  |                       | GIDALVVIGGDGSYMGAK            | 93  | 18 | 3  | 16.15 | b3y6y8                             | 1722.84 | 107.306 | 4478  | 3 | 574.95  | -18.63 |
| P65692 K6PF_SALTY 6-phohofructokinase          | 9  | Carbamidomethyl+C(8)  | LTEMGFPCIGLPGTIDNDIK          | 112 | 20 | 7  | 23.44 | b12°b12y4*y4y8y11*y11              | 2191.03 | 85.694  | 1699  | 2 | 1096.02 | -21.06 |
| P65692 K6PF_SALTY 6-phohofructokinase          | 10 | Carbamidomethyl+C(12) | KHAIVAITEHMCDDVDELAHFIEK      | 214 | 23 | 5  | 20.86 | b3y3y6y10°y10                      | 2706.38 | 62.895  | 50031 | 3 | 902.80  | 14.25  |
| P65692 K6PF_SALTY 6-phohofructokinase          | 11 |                       | DENIRAVAIENLK                 | 78  | 13 | 4  | 28.83 | b4b9b10°b10                        | 1484.81 | 57.561  | 8168  | 2 | 742.91  | 0.74   |
| P65692 K6PF_SALTY 6-phohofructokinase          | 12 | Phosphoryl STY(5)     | IGVLTSGGDAPGMNAAIR            | 4   | 18 | 4  | 27.46 | b3y8y15y16                         | 1779.84 | 72.938  | 3747  | 3 | 593.95  | 3.43   |
| P65692 K6PF_SALTY 6-phohofructokinase          | 13 | Oxidation+M(13)       | IGVLTSGGDAPGMNAAIR            | 4   | 18 | 7  | 51.34 | b10b13°b13y7y8y13y14               | 1715.87 | 56.491  | 4712  | 2 | 858.44  | -0.64  |

|                                                    |    |                 |                                         |     |    |    |       |                                   |         |         |       |   |         |        |
|----------------------------------------------------|----|-----------------|-----------------------------------------|-----|----|----|-------|-----------------------------------|---------|---------|-------|---|---------|--------|
| P65692 K6PF_SALTY 6-phosphofructokinase            | 14 | Oxidation+M(10) | AALTEGLEVMGIYDGYLGLYEDR                 | 26  | 23 | 4  | 18.23 | b6b10y6y9                         | 2564.24 | 117.043 | 4206  | 3 | 855.42  | 4.95   |
| P0A2A7 RL30_SALTY 50S ribosomal protein L30        | 1  |                 | GMVNAVSEFMVK                            | 45  | 11 | 7  | 42.39 | b2b5b6y5°y5y6y11                  | 1182.60 | 72.429  | 97689 | 2 | 591.80  | -3.30  |
| P0A2A7 RL30_SALTY 50S ribosomal protein L30        | 2  |                 | ATLLGLGLR                               | 21  | 9  | 5  | 39.08 | y1y4y6y7y9                        | 913.57  | 73.217  | 22838 | 2 | 457.29  | -14.63 |
| P0A2A7 RL30_SALTY 50S ribosomal protein L30        | 3  |                 | SAIGRLPK                                | 11  | 8  | 3  | 33.93 | b4y5y6                            | 841.51  | 32.961  | 20974 | 2 | 421.26  | -12.69 |
| P0A2A7 RL30_SALTY 50S ribosomal protein L30        | 4  |                 | IGHTVEREDTPAVR                          | 31  | 14 | 4  | 19.96 | b4y7°y7y9                         | 1579.81 | 84.391  | 11649 | 2 | 790.41  | -5.18  |
| P0A2A7 RL30_SALTY 50S ribosomal protein L30        | 5  |                 | GMVNAVSEFMVK                            | 45  | 11 | 0  | 2.26  |                                   | 1165.56 | 72.415  | 1824  | 2 | 583.28  | -12.15 |
| Q8ZQM3 GSIB_SALTY Glutathione-binding protein gsiB | 1  |                 | NLTGFWIMPDTGFSFDDADLK                   | 491 | 21 | 11 | 33.09 | b1b2b6°b6y1y2y6y8y11y13y21        | 2390.11 | 106.524 | 23949 | 2 | 1195.56 | 5.21   |
| Q8ZQM3 GSIB_SALTY Glutathione-binding protein gsiB | 2  |                 | DIGFHPVGTGPYQLETWNQTDFV K               | 176 | 24 | 11 | 65.71 | b5b10b13b14b20y8y9y10°y10*y10y24  | 2749.34 | 83.032  | 23206 | 3 | 917.12  | 4.88   |
| Q8ZQM3 GSIB_SALTY Glutathione-binding protein gsiB | 3  |                 | FQDGADFNAAVK                            | 97  | 13 | 5  | 35.82 | b2y9y10y11y13                     | 1353.64 | 49.420  | 20368 | 2 | 677.33  | 0.18   |
| Q8ZQM3 GSIB_SALTY Glutathione-binding protein gsiB | 4  |                 | AAMLQTGEAQFAFPIPYEAALLA K               | 229 | 25 | 12 | 75.48 | b3b6°b6b8b9b11b15b20b23°b23y20y25 | 2679.40 | 97.028  | 15581 | 3 | 893.81  | 6.01   |
| Q8ZQM3 GSIB_SALTY Glutathione-binding protein gsiB | 5  |                 | ITAMDAGQR                               | 379 | 9  | 4  | 39.08 | y4y5*y5y7                         | 962.46  | 28.887  | 14875 | 2 | 481.74  | -9.39  |
| Q8ZQM3 GSIB_SALTY Glutathione-binding protein gsiB | 6  |                 | ELLKEAGYPDGFSTTLWSSHNHSTAQK             | 335 | 27 | 6  | 23.19 | b2b6b8b9°b9y9                     | 3004.40 | 65.490  | 14506 | 4 | 751.86  | -13.41 |
| Q8ZQM3 GSIB_SALTY Glutathione-binding protein gsiB | 7  |                 | NLELVASPSIMQR                           | 256 | 13 | 7  | 44.42 | b3b9y3y8*y8y10y13                 | 1457.77 | 68.338  | 12608 | 2 | 729.39  | -2.76  |
| Q8ZQM3 GSIB_SALTY Glutathione-binding protein gsiB | 8  |                 | SFYQGLFGLDKDMK                          | 56  | 14 | 7  | 43.71 | b3b8°b8b11b12°b12y13              | 1648.80 | 68.875  | 5784  | 2 | 824.90  | -4.37  |
| Q8ZQM3 GSIB_SALTY Glutathione-binding protein gsiB | 9  |                 | EAQDIWKESPWIVLVEK                       | 465 | 19 | 4  | 15.48 | b5b11y2y6                         | 2280.21 | 92.132  | 1606  | 3 | 760.74  | -8.67  |
| Q8ZQM3 GSIB_SALTY Glutathione-binding protein gsiB | 10 |                 | YISMNVTQKPFDNPK                         | 269 | 15 | 6  | 71.93 | y4y6y8y9y10y13                    | 1781.86 | 55.403  | 26531 | 3 | 594.63  | -15.89 |
| Q8ZQM3 GSIB_SALTY Glutathione-binding protein gsiB | 11 |                 | EALNYAINR                               | 286 | 9  | 3  | 39.08 | y3y6y7                            | 1063.54 | 44.879  | 18002 | 2 | 532.27  | -15.38 |
| Q8ZQM3 GSIB_SALTY Glutathione-binding protein gsiB | 12 |                 | LDSITWRPVTDNNTR                         | 214 | 15 | 8  | 70.16 | y4°y4y7y10°y10y11y13y14           | 1787.92 | 56.544  | 6998  | 2 | 894.46  | 8.06   |
| Q8ZQM3 GSIB_SALTY Glutathione-binding protein gsiB | 13 |                 | NVLAEGYTVSDDGLTYTITLR                   | 72  | 21 | 6  | 25.5  | b13°b13b14b20y11°y11              | 2301.16 | 87.237  | 5609  | 4 | 576.05  | 1.49   |
| Q8ZQM3 GSIB_SALTY Glutathione-binding protein gsiB | 14 |                 | EAGYPDGFSTTLWSSHNHSTAQK                 | 339 | 23 | 8  | 35.27 | b3b12y7°y7y9°y9y10y19             | 2521.13 | 60.190  | 4486  | 3 | 841.05  | -2.03  |
| Q8ZQM3 GSIB_SALTY Glutathione-binding protein gsiB | 15 |                 | NKNLELVASPSIMQR                         | 254 | 15 | 3  | 26.87 | b3b4b11                           | 1699.92 | 66.188  | 75472 | 4 | 425.73  | 1.08   |
| Q8ZQM3 GSIB_SALTY Glutathione-binding protein gsiB | 16 |                 | ITLKQPFSAFINILAHPATAMISPPA LEK          | 144 | 29 | 6  | 17.49 | b10*b10y6*y6y11y13                | 3150.71 | 109.402 | 29512 | 4 | 788.43  | -8.21  |
| Q8ZQM3 GSIB_SALTY Glutathione-binding protein gsiB | 17 |                 | AAEVEGKGQK                              | 388 | 10 | 3  | 27.7  | b3b9y3                            | 1016.53 | 38.318  | 23970 | 2 | 508.77  | -10.03 |
| Q8ZQM3 GSIB_SALTY Glutathione-binding protein gsiB | 18 |                 | QALVKVAFAGYATPATGTVVPPSIAYAQSYQPWPYPDAK | 295 | 38 | 4  | 16.5  | y5y8°y8y12                        | 4023.03 | 82.895  | 17599 | 4 | 1006.51 | -9.71  |
| Q8ZQM3 GSIB_SALTY Glutathione-binding protein gsiB | 19 |                 | VAFAGYATPATGTVVPPSIAYAQSYQPWPYPDAKAR    | 300 | 35 | 5  | 24.72 | b8°b8b9y8y11                      | 3710.86 | 125.985 | 9777  | 4 | 928.47  | -1.38  |
| Q8ZQM3 GSIB_SALTY Glutathione-binding protein gsiB | 20 |                 | SFYQGLFGLDKDMK                          | 56  | 14 | 4  | 28.56 | b4b6y5y8                          | 1648.79 | 77.322  | 4484  | 3 | 550.27  | -7.03  |
| Q8ZQM3 GSIB_SALTY Glutathione-binding protein gsiB | 21 | Oxidation+M(11) | NLELVASPSIMQR                           | 256 | 13 | 4  | 40.31 | b3y6y7y8                          | 1473.76 | 95.238  | 5876  | 2 | 737.38  | -8.37  |
| Q8ZQM3 GSIB_SALTY Glutathione-binding protein gsiB | 22 |                 | NQTDFVK                                 | 193 | 7  | 0  | 7.17  |                                   | 851.43  | 83.017  | 8104  | 1 | 851.43  | 3.87   |
| Q8ZQM3 GSIB_SALTY Glutathione-binding protein gsiB | 23 |                 | FYQGLFGLDKDMK                           | 57  | 13 | 1  | 7.38  | b9                                | 1561.77 | 68.910  | 3515  | 2 | 781.39  | -0.08  |

|                                    |    |                       |                                 |     |    |    |       |                                    |         |         |       |   |         |        |
|------------------------------------|----|-----------------------|---------------------------------|-----|----|----|-------|------------------------------------|---------|---------|-------|---|---------|--------|
| P51066 ACEA_SALTY Isocitrate lyase | 1  | Carbamidomethyl+C(13) | GLAYAPYADLVWCETSTPDLELA<br>R    | 275 | 24 | 5  | 20.16 | b3b7b9°b9y12                       | 2711.29 | 89.231  | 19679 | 4 | 678.58  | -2.97  |
| P51066 ACEA_SALTY Isocitrate lyase | 2  |                       | VLVPTQEAIQK                     | 201 | 11 | 4  | 28.07 | b2b3y8y9                           | 1225.71 | 47.673  | 16919 | 2 | 613.36  | -6.47  |
| P51066 ACEA_SALTY Isocitrate lyase | 3  | Carbamidomethyl+C(7)  | GSVNPECTLAQLGAAK                | 36  | 16 | 4  | 17.79 | b2b6y10y12                         | 1615.83 | 65.751  | 13038 | 2 | 808.42  | 9.90   |
| P51066 ACEA_SALTY Isocitrate lyase | 4  | Carbamidomethyl+C(6)  | LLAYNCSPSFNWQK                  | 312 | 14 | 11 | 64.86 | b3b6b11°b12y3y7y8°y8y1<br>0°y11y14 | 1727.84 | 68.791  | 10930 | 2 | 864.42  | 8.05   |
| P51066 ACEA_SALTY Isocitrate lyase | 5  |                       | LAADVMSGVPTLVIAR                | 217 | 15 | 6  | 49.16 | b4b7y3y7y9y10                      | 1525.88 | 83.275  | 10278 | 2 | 763.44  | 3.12   |
| P51066 ACEA_SALTY Isocitrate lyase | 6  |                       | VTTIIQGGASSVTALTGSTEEAQF        | 410 | 24 | 3  | 23.4  | y3y4y10                            | 2368.21 | 72.067  | 7983  | 3 | 790.08  | 10.62  |
| P51066 ACEA_SALTY Isocitrate lyase | 7  |                       | TIASFQQQLSDMGYK                 | 331 | 15 | 4  | 30.4  | b7y5y11y12                         | 1716.83 | 89.088  | 5758  | 2 | 858.92  | -0.21  |
| P51066 ACEA_SALTY Isocitrate lyase | 8  |                       | SMIEAGAAAVHFEDQLASVKK           | 173 | 21 | 3  | 21.01 | b8b10b13                           | 2202.13 | 128.462 | 2216  | 3 | 734.72  | 4.66   |
| P51066 ACEA_SALTY Isocitrate lyase | 9  |                       | ADQIQWASGIEPNDR                 | 130 | 16 | 3  | 26.16 | b4b5b12                            | 1796.86 | 61.478  | 2067  | 2 | 898.94  | 3.80   |
| P51066 ACEA_SALTY Isocitrate lyase | 10 |                       | YVDYFLPIVADAEAGFGGVLNAF<br>ELMK | 146 | 27 | 3  | 18.31 | y6y13y15                           | 2949.50 | 137.068 | 1663  | 3 | 983.84  | 8.44   |
| P51066 ACEA_SALTY Isocitrate lyase | 11 |                       | INNTR                           | 123 | 6  | 1  | 13.9  | b3                                 | 764.40  | 36.252  | 8118  | 2 | 382.70  | -5.19  |
| P51066 ACEA_SALTY Isocitrate lyase | 12 |                       | DGYTFVSHQQEVGTGYFDK             | 391 | 19 | 4  | 22.44 | b5b7b10°b10                        | 2177.94 | 59.690  | 6550  | 4 | 545.24  | -19.06 |
| P51066 ACEA_SALTY Isocitrate lyase | 13 |                       | EWTPR                           | 13  | 6  | 2  | 30.44 | y3y5                               | 816.39  | 62.348  | 4016  | 1 | 816.39  | -9.35  |
| P51066 ACEA_SALTY Isocitrate lyase | 14 |                       | WEGITRYPYSAEEVVK                | 19  | 15 | 4  | 24.81 | b3°b3b4y9                          | 1763.89 | 121.875 | 3718  | 3 | 588.63  | -5.81  |
| P51066 ACEA_SALTY Isocitrate lyase | 15 |                       | SMIEAGAAAVHFEDQLASVK            | 173 | 20 | 6  | 20.59 | b3°b3b8°b8y8y12                    | 2073.98 | 118.222 | 3421  | 3 | 692.00  | -21.89 |
| P51066 ACEA_SALTY Isocitrate lyase | 16 |                       | KGYINSLGALTGGQALQQAQK           | 62  | 20 | 4  | 20.59 | b3b15y9y13                         | 2018.09 | 64.185  | 16297 | 3 | 673.37  | -4.23  |
| P51066 ACEA_SALTY Isocitrate lyase | 17 | Carbamidomethyl+C(6)  | LLAYNCSPSFNWQKNLDDK             | 312 | 19 | 6  | 30.57 | b3b8°b8b11y5y7                     | 2313.12 | 120.458 | 9086  | 3 | 771.71  | 10.34  |
| P51066 ACEA_SALTY Isocitrate lyase | 18 | Carbamidomethyl+C(7)  | GSVNPECTLAQLGAQMWR              | 36  | 19 | 3  | 15.48 | b11y13y18                          | 2089.04 | 104.561 | 7714  | 3 | 697.02  | 5.03   |
| P51066 ACEA_SALTY Isocitrate lyase | 19 |                       | TRTQQIEELQK                     | 2   | 11 | 4  | 25.06 | b4°b4b8y4                          | 1373.72 | 125.133 | 2181  | 2 | 687.36  | -14.22 |
| P51066 ACEA_SALTY Isocitrate lyase | 20 | Phosphoryl STY(12)    | TQQIEELQKEWTQPR                 | 4   | 15 | 3  | 18.79 | b10y3y8                            | 1993.92 | 82.444  | 2575  | 3 | 665.31  | -2.27  |
| P51066 ACEA_SALTY Isocitrate lyase | 21 |                       | VLVPTQEAIQ                      | 201 | 10 | 0  | 2.26  |                                    | 1097.62 | 47.626  | 14873 | 2 | 549.32  | 3.34   |
| P11003 METF_SALTY 5                | 1  | Carbamidomethyl+C(11) | TGLEAAPHLTCIDATRDEL             | 80  | 20 | 5  | 23.02 | b3y2y16y17y20                      | 2239.10 | 58.839  | 27401 | 3 | 747.04  | -5.02  |
| P11003 METF_SALTY 5                | 2  |                       | LVGANIAMDMVK                    | 250 | 12 | 6  | 26.99 | b5°b5y4°y8°y8y9                    | 1261.65 | 70.655  | 14387 | 2 | 631.33  | -10.93 |
| P11003 METF_SALTY 5                | 3  |                       | SAQADLLNLKR                     | 160 | 11 | 6  | 39.38 | b1b3°b3b4y4y7                      | 1228.70 | 50.869  | 11102 | 2 | 614.85  | -2.48  |
| P11003 METF_SALTY 5                | 4  |                       | IPSWMSLMFEGLDNDNAETRK           | 230 | 20 | 6  | 26.08 | b8y1y8y11°y11y12                   | 2340.11 | 103.472 | 10607 | 3 | 780.71  | 2.71   |
| P11003 METF_SALTY 5                | 5  |                       | TSEMEQTLWNSIDR                  | 33  | 14 | 5  | 19.96 | b2b12y2y4y10                       | 1709.80 | 77.072  | 8332  | 2 | 855.40  | 10.57  |
| P11003 METF_SALTY 5                | 6  |                       | FVSVTYGANSGER                   | 54  | 13 | 4  | 21.35 | b10°b10y3y9                        | 1386.67 | 45.185  | 2631  | 2 | 693.84  | 2.99   |
| P11003 METF_SALTY 5                | 7  |                       | AITQFFFDVESYLR                  | 179 | 14 | 5  | 40.33 | b9b12b13y8y10                      | 1735.86 | 96.959  | 1600  | 2 | 868.43  | -8.02  |
| P11003 METF_SALTY 5                | 8  |                       | EVADFDISVAAYPEVHPEAK            | 140 | 20 | 4  | 26.08 | b5y4y5y15                          | 2187.02 | 81.105  | 84173 | 3 | 729.68  | -16.63 |
| P11003 METF_SALTY 5                | 9  |                       | FADMTNVR                        | 222 | 8  | 4  | 36.94 | b3y4y7°y7                          | 953.47  | 57.036  | 8811  | 2 | 477.24  | 18.76  |
| P11003 METF_SALTY 5                | 10 |                       | IPSWMSLMFEGLDNDNAETR            | 230 | 19 | 6  | 30.57 | b5°b5b7b13y4y7                     | 2212.05 | 110.624 | 7173  | 2 | 1106.53 | 20.09  |
| P11003 METF_SALTY 5                | 11 |                       | MSFFHANQR                       | 0   | 9  | 3  | 31.3  | b5y7y8                             | 1137.51 | 67.377  | 7138  | 2 | 569.26  | -9.98  |
| P11003 METF_SALTY 5                | 12 |                       | GDLPPGSGKPEMYAADLVGLLK          | 118 | 22 | 4  | 20.41 | b5b8°b8b15                         | 2228.14 | 98.554  | 3505  | 3 | 743.38  | -12.60 |
| P11003 METF_SALTY 5                | 13 | Carbamidomethyl+C(11) | TGLEAAPHLTCIDATR                | 80  | 16 | 3  | 24.32 | b4b5y3                             | 1725.86 | 46.512  | 1960  | 3 | 575.96  | -0.42  |
| P11003 METF_SALTY 5                | 14 |                       | DFHFYTLNR                       | 270 | 9  | 3  | 39.08 | b5b6b8                             | 1212.57 | 59.131  | 1945  | 2 | 606.79  | -7.05  |

|                                               |    |                       |                                                |     |    |   |       |                              |         |         |       |   |         |        |
|-----------------------------------------------|----|-----------------------|------------------------------------------------|-----|----|---|-------|------------------------------|---------|---------|-------|---|---------|--------|
| P11003 METF_SALTY 5                           | 15 |                       | TIARDYWNNGIR                                   | 100 | 12 | 3 | 23.01 | b3b9y3                       | 1478.77 | 62.767  | 5624  | 2 | 739.89  | 13.70  |
| P11003 METF_SALTY 5                           | 16 |                       | DRTHSVIK                                       | 67  | 8  | 5 | 41.71 | b3°b3b4b5°b5                 | 955.54  | 72.329  | 3328  | 2 | 478.27  | 10.28  |
| P11003 METF_SALTY 5                           | 17 |                       | VDAGANRAITQFFFDVESYLR                          | 172 | 21 | 5 | 27.85 | b4b7b14y7y10                 | 2419.21 | 91.427  | 2206  | 4 | 605.56  | 4.24   |
| P11003 METF_SALTY 5                           | 18 | Carbamidomethyl+C(13) | ERTGLEAAPHLTICIDATR                            | 78  | 18 | 3 | 16.15 | b7b10y7                      | 2010.99 | 52.718  | 2098  | 3 | 671.00  | -8.26  |
| P11003 METF_SALTY 5                           | 19 | Oxidation+M(12)       | GDLPPGSGKPEMYAADLVGLLKE<br>VADFDISVAAYPEVHPEAK | 118 | 42 | 7 | 22.85 | b7°b7b8°b8b22y5y10           | 4412.21 | 112.713 | 11356 | 4 | 1103.81 | 1.11   |
| P11003 METF_SALTY 5                           | 20 | Oxidation+M(10)       | LVGANIAMDMVK                                   | 250 | 12 | 4 | 33.23 | b8b10y3y6                    | 1277.64 | 87.281  | 7121  | 2 | 639.33  | -11.47 |
| P11003 METF_SALTY 5                           | 21 | Carbamidomethyl+C(1)  | CIDATRDELRL                                    | 90  | 10 | 0 | 5.66  |                              | 1248.61 | 58.868  | 24483 | 2 | 624.81  | 7.92   |
| P11003 METF_SALTY 5                           | 22 |                       | SAQADLLNL                                      | 160 | 9  | 1 | 8.01  | y5                           | 944.51  | 50.843  | 6744  | 1 | 944.51  | 5.11   |
| P11003 METF_SALTY 5                           | 23 |                       | IPSWMSLMFEGLDND                                | 230 | 15 | 3 | 21.68 | y3y6y14                      | 1754.80 | 103.467 | 2032  | 2 | 877.90  | 12.73  |
| P11003 METF_SALTY 5                           | 24 |                       | QADLLNLKR                                      | 162 | 9  | 0 | 2.26  |                              | 1070.63 | 50.840  | 1719  | 2 | 535.82  | 2.17   |
| P0A1S4 STPA_SALTY DNA-binding<br>protein stpA | 1  |                       | ADGINPEELFAMDSAMPR                             | 66  | 18 | 9 | 32.17 | b3b5°b5°b5b11°b11y4y8y1<br>8 | 1963.91 | 88.802  | 18440 | 2 | 982.46  | 8.64   |
| P0A1S4 STPA_SALTY DNA-binding<br>protein stpA | 2  |                       | MNLMLQNLNNIR                                   | 0   | 12 | 8 | 64.26 | b2b3b6y3y4y8y9y12            | 1473.77 | 75.997  | 16841 | 2 | 737.39  | 0.41   |
| P0A1S4 STPA_SALTY DNA-binding<br>protein stpA | 3  |                       | TPKPIAQALAAGK                                  | 113 | 13 | 5 | 21.35 | b3y1y4y10y13                 | 1265.75 | 45.867  | 16419 | 2 | 633.38  | -8.87  |
| P0A1S4 STPA_SALTY DNA-binding<br>protein stpA | 4  |                       | SLDDFLI                                        | 126 | 7  | 5 | 51.85 | b3b4b6y6°y6                  | 822.42  | 35.510  | 84026 | 2 | 411.71  | -3.12  |
| P0A1S4 STPA_SALTY DNA-binding<br>protein stpA | 5  |                       | TWTGQGR                                        | 106 | 7  | 3 | 38.33 | b5y5y6                       | 805.40  | 35.517  | 6695  | 2 | 403.21  | 11.37  |
| P0A1S4 STPA_SALTY DNA-binding<br>protein stpA | 6  | Oxidation+M(14)       | AMAREFSIDVLEEMLEK                              | 15  | 17 | 5 | 27.05 | b5b7b10°b10y11               | 2026.99 | 74.167  | 2362  | 3 | 676.33  | 1.69   |
| Q7CQ70 YEJL_SALTY UPF0352 protein<br>yejL     | 1  |                       | QAIANSFAR                                      | 54  | 9  | 8 | 46.08 | b2°b2b6°b7b8y5°y5y7          | 977.51  | 39.730  | 9183  | 2 | 489.26  | -10.12 |
| Q7CQ70 YEJL_SALTY UPF0352 protein<br>yejL     | 2  |                       | YSDEHVEQLLSELLSVLEK                            | 6   | 19 | 5 | 23.26 | b11°b11y1y3y4                | 2231.13 | 124.558 | 6137  | 3 | 744.38  | -7.99  |
| Q7CQ70 YEJL_SALTY UPF0352 protein<br>yejL     | 3  |                       | ALQSSISEDNAH                                   | 63  | 12 | 9 | 45.51 | b4b6°b6y1y3°y3y8y9°y9        | 1271.59 | 32.059  | 6094  | 2 | 636.30  | 2.11   |
| Q7CQ70 YEJL_SALTY UPF0352 protein<br>yejL     | 4  |                       | YSDEHVEQLLSELLSVLEKHK                          | 6   | 21 | 3 | 21.01 | b3b12b18                     | 2496.30 | 89.049  | 12359 | 3 | 832.77  | 2.74   |
| Q7CQ70 YEJL_SALTY UPF0352 protein<br>yejL     | 5  |                       | QAIANSFARALQSSISEDNAH                          | 54  | 21 | 8 | 38.99 | b6°b6b9b14°b14y10y11y1<br>3  | 2230.11 | 73.405  | 2550  | 3 | 744.04  | 10.29  |
| Q8ZPS5 YDIU_SALTY UPF0061 protein<br>ydiU     | 1  |                       | ALSIVTSDTPVQRETQETGAMLM<br>R                   | 148 | 24 | 6 | 13.11 | b3y1y4y7°y7y24               | 2634.29 | 77.357  | 26313 | 3 | 878.77  | -13.72 |
| Q8ZPS5 YDIU_SALTY UPF0061 protein<br>ydiU     | 2  |                       | YQDALLTHYGQR                                   | 318 | 12 | 8 | 23.01 | b1b10°b10y2y3°y3y5y12        | 1464.71 | 47.486  | 13895 | 2 | 732.86  | -12.33 |
| Q8ZPS5 YDIU_SALTY UPF0061 protein<br>ydiU     | 3  |                       | TEAVDDALR                                      | 403 | 9  | 9 | 76.65 | b3b9y4y5°y5y6y7y8y9          | 989.50  | 36.825  | 5232  | 2 | 495.25  | 7.90   |
| Q8ZPS5 YDIU_SALTY UPF0061 protein<br>ydiU     | 4  |                       | MLSHTEQQSASSPLRDTFIDR                          | 367 | 21 | 5 | 19.72 | b4b9y2y6y16                  | 2419.19 | 62.295  | 4948  | 3 | 807.07  | 11.00  |
| Q8ZPS5 YDIU_SALTY UPF0061 protein<br>ydiU     | 5  |                       | DDNVLLNELFSLMAREGSDYTR                         | 342 | 22 | 6 | 30.04 | b5b10°b10y4y9y10             | 2558.24 | 118.039 | 3438  | 3 | 853.42  | 7.73   |
| Q8ZPS5 YDIU_SALTY UPF0061 protein<br>ydiU     | 6  |                       | QQQMQR                                         | 412 | 6  | 1 | 13.9  | y4                           | 818.40  | 31.991  | 17498 | 2 | 409.71  | 13.28  |
| Q8ZPS5 YDIU_SALTY UPF0061 protein<br>ydiU     | 7  |                       | MLSHTEQQSASSPLR                                | 367 | 15 | 4 | 26.76 | b4b7y9y11                    | 1671.81 | 108.937 | 14325 | 3 | 557.94  | -3.07  |
| Q8ZPS5 YDIU_SALTY UPF0061 protein<br>ydiU     | 8  |                       | AIDAAEQGDMAELHR                                | 432 | 15 | 3 | 24.81 | b5b6y10                      | 1626.72 | 62.985  | 9971  | 3 | 542.91  | -18.16 |
| Q8ZPS5 YDIU_SALTY UPF0061 protein<br>ydiU     | 9  |                       | FDNQPSVALWNLQR                                 | 284 | 14 | 4 | 19.96 | b12y3y11°y11                 | 1687.89 | 71.294  | 5890  | 2 | 844.45  | 20.18  |
| Q8ZPS5 YDIU_SALTY UPF0061 protein<br>ydiU     | 10 |                       | ETQETGAMLMR                                    | 161 | 11 | 5 | 37.8  | b7y4y5y9°y9                  | 1266.61 | 54.620  | 2692  | 3 | 422.87  | 20.53  |
| Q8ZPS5 YDIU_SALTY UPF0061 protein<br>ydiU     | 11 |                       | NWLAQR                                         | 426 | 6  | 1 | 13.9  | y5                           | 787.43  | 39.782  | 2253  | 2 | 394.22  | 12.25  |

|                                              |    |                   |                                    |     |    |    |       |                                    |         |         |       |   |         |        |
|----------------------------------------------|----|-------------------|------------------------------------|-----|----|----|-------|------------------------------------|---------|---------|-------|---|---------|--------|
| [Q8ZPS5]YDIU_SALTY UPF0061 protein ydiU      | 12 |                   | LAQSHMRFGHFHFYYR                   | 172 | 17 | 5  | 28.3  | b9y4y5y8°y8                        | 2226.04 | 88.091  | 17491 | 4 | 557.26  | -3.73  |
| [Q8ZPS5]YDIU_SALTY UPF0061 protein ydiU      | 13 |                   | DDNVLLNELFSLMAREGSDYTR             | 342 | 22 | 4  | 13.9  | b5°b5b8y4                          | 2558.24 | 117.033 | 9293  | 3 | 853.42  | 7.73   |
| [Q8ZPS5]YDIU_SALTY UPF0061 protein ydiU      | 14 |                   | ALDRYQDALLTHYGQR                   | 314 | 16 | 3  | 17.79 | b3y9y11                            | 1919.99 | 77.124  | 6500  | 3 | 640.67  | 9.09   |
| [Q8ZPS5]YDIU_SALTY UPF0061 protein ydiU      | 15 |                   | YQDALLTHYGQRM                      | 318 | 14 | 4  | 31.73 | b6b8b9y7                           | 1751.86 | 92.106  | 3617  | 3 | 584.62  | -3.55  |
| [Q8ZPS5]YDIU_SALTY UPF0061 protein ydiU      | 16 |                   | VQQLADFAIRHYWPQWQDVPEK             | 194 | 22 | 6  | 18.94 | b5b7°b7*b7y4y10                    | 2754.35 | 107.665 | 3020  | 2 | 1377.68 | -8.86  |
| [Q8ZPS5]YDIU_SALTY UPF0061 protein ydiU      | 17 |                   | TFRMLSHTEQQSASSPLR                 | 364 | 18 | 5  | 30.03 | b8b10°b10y9y10                     | 2076.03 | 68.805  | 2655  | 2 | 1038.52 | 0.00   |
| [Q8ZPS5]YDIU_SALTY UPF0061 protein ydiU      | 18 |                   | HYWPQWQDVPEKYALWFEEVAA<br>R        | 204 | 23 | 3  | 13.48 | b4b12y8                            | 2948.45 | 105.091 | 1976  | 4 | 737.87  | 10.93  |
| [Q8ZPS5]YDIU_SALTY UPF0061 protein ydiU      | 19 |                   | AIDAAEQGDMAELHRLHEVLR              | 432 | 21 | 4  | 25.5  | b4b7b8y6                           | 2374.22 | 111.437 | 1622  | 2 | 1187.62 | 13.37  |
| [Q8ZPS5]YDIU_SALTY UPF0061 protein ydiU      | 20 | Phosphoryl STY(9) | STIRESLASEAMHYLGIPTR               | 127 | 21 | 6  | 36.64 | b11y11°y11y12°y12y13               | 2413.16 | 62.314  | 37435 | 4 | 604.05  | 4.65   |
| [Q8ZPS5]YDIU_SALTY UPF0061 protein ydiU      | 21 | Oxidation+M(13)   | DDNVLLNELFSLMAREGSDYTR             | 342 | 22 | 5  | 37.92 | b6b7b8°b8b10                       | 2574.21 | 125.421 | 10419 | 3 | 858.74  | -0.95  |
| [Q8ZPS5]YDIU_SALTY UPF0061 protein ydiU      | 22 | Oxidation+M(21)   | LGFFTEQKDDNVLLNELFSLMAR            | 334 | 23 | 3  | 13.48 | b5y5y12                            | 2716.34 | 107.842 | 6705  | 3 | 906.12  | -9.53  |
| [Q8ZPS5]YDIU_SALTY UPF0061 protein ydiU      | 23 | Oxidation+M(21)   | LGFFTEQKDDNVLLNELFSLMAR<br>EGSDYTR | 334 | 30 | 4  | 26.89 | y3y5y11y12                         | 3524.69 | 108.213 | 1729  | 3 | 1175.57 | -4.23  |
| [Q8ZPS5]YDIU_SALTY UPF0061 protein ydiU      | 24 | Oxidation+M(13)   | DDNVLLNELFSLMAR                    | 342 | 15 | 3  | 18.79 | b8b13y9                            | 1765.86 | 104.144 | 1631  | 2 | 883.43  | -11.48 |
| [Q8ZRC9]YAJQ_SALTY UPF0234 protein yajQ      | 1  |                   | GIEGASLDVPDEFVHSGK                 | 72  | 18 | 7  | 25.7  | b2b9y2y3y6y10y18                   | 1856.89 | 66.577  | 34617 | 3 | 619.63  | -8.87  |
| [Q8ZRC9]YAJQ_SALTY UPF0234 protein yajQ      | 2  |                   | VLSESDFQVNQLLDILR                  | 49  | 17 | 8  | 51.83 | b2b8y2y3y4y5y6y17                  | 1989.08 | 104.598 | 30900 | 2 | 995.04  | 6.01   |
| [Q8ZRC9]YAJQ_SALTY UPF0234 protein yajQ      | 3  |                   | SRDDLQSVMAVLR                      | 135 | 13 | 13 | 92.66 | b1b3b4°b4b6b7°b7*b7b12<br>y2y3y4y5 | 1489.77 | 75.166  | 24468 | 2 | 745.39  | -3.20  |
| [Q8ZRC9]YAJQ_SALTY UPF0234 protein yajQ      | 4  |                   | GGDLGQPFQFK                        | 148 | 11 | 7  | 39.38 | b2b5b6b11y5y7y11                   | 1193.59 | 63.250  | 22744 | 2 | 597.30  | -1.94  |
| [Q8ZRC9]YAJQ_SALTY UPF0234 protein yajQ      | 5  |                   | VQAQIQGEEIR                        | 120 | 11 | 10 | 72.63 | b1b2*b2b3y2y4y6y7y8y9              | 1270.67 | 39.253  | 12007 | 2 | 635.84  | -5.67  |
| [Q8ZRC9]YAJQ_SALTY UPF0234 protein yajQ      | 6  |                   | GVEATIELNDANK                      | 33  | 13 | 4  | 33.32 | b7b11b12y5                         | 1373.71 | 56.603  | 15693 | 3 | 458.58  | 16.35  |
| [Q8ZRC9]YAJQ_SALTY UPF0234 protein yajQ      | 7  |                   | QGIESAVQK                          | 99  | 9  | 3  | 39.08 | b3b5b6                             | 959.53  | 72.205  | 5509  | 1 | 959.53  | 17.49  |
| [Q8ZRC9]YAJQ_SALTY UPF0234 protein yajQ      | 8  |                   | DDLQSVMAVLR                        | 137 | 11 | 4  | 25.06 | b6°b6y4y6                          | 1246.63 | 39.800  | 2016  | 2 | 623.82  | -16.16 |
| [Q8ZRC9]YAJQ_SALTY UPF0234 protein yajQ      | 9  |                   | DDLQSVMAVLRGGDLGQPFQFK             | 137 | 22 | 4  | 20.41 | b6b11b14°b14                       | 2421.21 | 93.155  | 34098 | 3 | 807.74  | -6.25  |
| [Q8ZRC9]YAJQ_SALTY UPF0234 protein yajQ      | 10 |                   | MPSFDIVSEVDLQEARNGVDNAV<br>R       | 0   | 24 | 4  | 22.41 | b7b8°b8y12                         | 2661.29 | 112.285 | 8614  | 3 | 887.77  | 0.09   |
| [Q8ZRC9]YAJQ_SALTY UPF0234 protein yajQ      | 11 |                   | RGIEGASLDVPDEFVHSGK                | 71  | 19 | 4  | 15.48 | b12y11y15°y15                      | 2013.01 | 70.738  | 1881  | 3 | 671.68  | 4.00   |
| [Q8ZRC9]YAJQ_SALTY UPF0234 protein yajQ      | 12 | Oxidation+M(1)    | MPSFDIVSEVDLQEAR                   | 0   | 16 | 3  | 24.32 | b3b4y8                             | 1851.88 | 46.508  | 4081  | 3 | 617.96  | -0.40  |
| [Q8ZRC9]YAJQ_SALTY UPF0234 protein yajQ      | 13 |                   | EGASLDVPDEFVHSGK                   | 74  | 16 | 1  | 7.29  | b9                                 | 1686.81 | 66.579  | 2818  | 2 | 843.91  | 7.09   |
| [P61179]RL22_SALTY 50S ribosomal protein L22 | 1  |                   | IFVDEGPSMK                         | 73  | 10 | 7  | 62.53 | b2b3y5y6y8y9y10                    | 1122.54 | 50.821  | 52226 | 2 | 561.78  | -6.42  |
| [P61179]RL22_SALTY 50S ribosomal protein L22 | 2  |                   | LVADLIR                            | 18  | 7  | 6  | 51.85 | b2b3y3y5y6y7                       | 799.49  | 56.848  | 26340 | 2 | 400.25  | -11.91 |
| [P61179]RL22_SALTY 50S ribosomal protein L22 | 3  |                   | VLESAIANAEHNDGADIDDLK              | 49  | 21 | 5  | 25.5  | b5b11°b11b12y4                     | 2210.02 | 60.940  | 4889  | 3 | 737.34  | -18.01 |

|                                                           |    |                       |                                    |     |    |    |        |                                                       |         |         |        |   |         |        |
|-----------------------------------------------------------|----|-----------------------|------------------------------------|-----|----|----|--------|-------------------------------------------------------|---------|---------|--------|---|---------|--------|
| P61179 RL22_SALTY 50S ribosomal protein L22               | 4  |                       | VSQALDILTYTNK                      | 28  | 13 | 4  | 28.83  | b3°b3b5b6                                             | 1465.80 | 39.721  | 2043   | 2 | 733.40  | 5.83   |
| P61179 RL22_SALTY 50S ribosomal protein L22               | 5  |                       | KVLESAIANAEHNDGADIDDLK             | 48  | 22 | 3  | 13.9   | b9y4y9                                                | 2338.15 | 57.565  | 2793   | 3 | 780.06  | 0.00   |
| P61179 RL22_SALTY 50S ribosomal protein L22               | 6  |                       | IFVDEGPSMKR                        | 73  | 11 | 4  | 37.8   | b5b6b8y7                                              | 1278.66 | 69.814  | 1911   | 2 | 639.83  | 5.44   |
| P61179 RL22_SALTY 50S ribosomal protein L22               | 7  |                       | RTSHITVVVSDR                       | 98  | 12 | 4  | 36.23  | y3y4°y4y5                                             | 1369.74 | 34.924  | 1550   | 3 | 457.25  | -11.76 |
| P61179 RL22_SALTY 50S ribosomal protein L22               | 8  | Oxidation+M(9)        | IFVDEGPSMKR                        | 73  | 11 | 3  | 28.07  | b5y5y6                                                | 1294.66 | 47.955  | 13353  | 2 | 647.83  | 7.64   |
| P24900 RECF_SALTY DNA replication and repair protein recF | 1  |                       | NIENADLALSPGFNFLVGANGSGK           | 12  | 24 | 12 | 71.17  | b2°b2b4b5b7b10b11b12y7y8°y8y15                        | 2405.19 | 100.385 | 19911  | 3 | 802.40  | -8.83  |
| P24900 RECF_SALTY DNA replication and repair protein recF | 2  |                       | ADGAPVEDTLR                        | 259 | 12 | 3  | 23.01  | b3b10y5                                               | 1230.61 | 48.424  | 6158   | 2 | 615.81  | 11.90  |
| P24900 RECF_SALTY DNA replication and repair protein recF | 3  |                       | LQSEER                             | 73  | 6  | 1  | 13.9   | b3                                                    | 761.38  | 36.855  | 7310   | 2 | 381.19  | 3.05   |
| P24900 RECF_SALTY DNA replication and repair protein recF | 4  |                       | HEQEAFVLHGR                        | 62  | 11 | 7  | 42.57  | b3°b3b6b10°b10y10°y10                                 | 1322.68 | 69.798  | 3096   | 2 | 661.84  | 15.32  |
| P24900 RECF_SALTY DNA replication and repair protein recF | 5  |                       | MLTYTAHGPHK                        | 242 | 11 | 4  | 25.06  | b8°b8y3y5                                             | 1255.64 | 36.246  | 2773   | 3 | 419.22  | 15.56  |
| P24900 RECF_SALTY DNA replication and repair protein recF | 6  |                       | QGDSK                              | 89  | 5  | 1  | 13.53  | b4                                                    | 534.26  | 37.863  | 1807   | 1 | 534.26  | 9.14   |
| P24900 RECF_SALTY DNA replication and repair protein recF | 7  | Carbamidomethyl+C(2)  | RCLYLIDDFASELDDAR                  | 295 | 17 | 3  | 23.9   | b5y7y8                                                | 2071.98 | 101.158 | 16869  | 2 | 1036.50 | 4.48   |
| P24900 RECF_SALTY DNA replication and repair protein recF | 8  | Carbamidomethyl+C(15) | AEYSSAIAQDMADTCQQFLPEFSLTFSFQRGWEK | 192 | 34 | 5  | 11.12  | b3°b3b7°b7y7                                          | 3988.79 | 95.001  | 12701  | 5 | 798.56  | -6.92  |
| P24900 RECF_SALTY DNA replication and repair protein recF | 9  |                       | LAQGEFLTRESGR                      | 282 | 13 | 4  | 33.32  | b6y5y6y9                                              | 1463.78 | 105.601 | 6731   | 2 | 732.39  | 13.59  |
| P24900 RECF_SALTY DNA replication and repair protein recF | 10 | Carbamidomethyl+C(8)  | RAFLDWGCFHNEAGFFTAWSNLK            | 132 | 23 | 3  | 19.89  | b4b11b18                                              | 2774.33 | 80.509  | 2584   | 3 | 925.45  | 13.82  |
| P24900 RECF_SALTY DNA replication and repair protein recF | 11 |                       | MLTYTAHGPHKADFR                    | 242 | 15 | 4  | 18.79  | b12°b12y4y9                                           | 1744.87 | 83.927  | 1952   | 2 | 872.94  | 9.16   |
| P24900 RECF_SALTY DNA replication and repair protein recF | 12 |                       | DFRNIENADLALSPGFNFLVGANGSGK        | 9   | 27 | 8  | 28.32  | b3°b3b6b13y7y9y11°y11                                 | 2823.44 | 89.700  | 1663   | 3 | 941.82  | 13.58  |
| P24900 RECF_SALTY DNA replication and repair protein recF | 13 | Phosphoryl STY(8)     | GWEKETDYADVLER                     | 222 | 14 | 3  | 28.54  | y4y6y8                                                | 1790.77 | 29.899  | 3714   | 2 | 895.89  | 10.16  |
| P24900 RECF_SALTY DNA replication and repair protein recF | 14 | Phosphoryl STY(8)     | LQSEERETSIGLTK                     | 73  | 14 | 4  | 25.4   | b6°b6y7y8                                             | 1670.81 | 72.341  | 3088   | 2 | 835.91  | 14.83  |
| P24900 RECF_SALTY DNA replication and repair protein recF | 15 | Oxidation+M(19)       | ATQSQVFVSAISAEHVIDMSDENSK          | 321 | 25 | 5  | 16.99  | b7b13°b13y5y22                                        | 2709.31 | 75.941  | 21373  | 4 | 678.08  | 14.87  |
| P0A2B3 RS7_SALTY 30S ribosomal protein S7                 | 1  |                       | STAESIVYSALETLAQR                  | 36  | 17 | 21 | 104.24 | b2°b2b5°b5b8b14y1y2°y2y3°y3y4°y4y5°y5y6°y6y7y10y11y17 | 1838.96 | 105.966 | 67530  | 2 | 919.98  | 7.04   |
| P0A2B3 RS7_SALTY 30S ribosomal protein S7                 | 2  |                       | SELEAFEVALENVRPTEVK                | 56  | 20 | 12 | 37.27  | b1b2°b2b3°b3b5°b5b13y2y15y16y20                       | 2259.18 | 91.496  | 47156  | 3 | 753.73  | -3.67  |
| P0A2B3 RS7_SALTY 30S ribosomal protein S7                 | 3  |                       | FVNILMVDGK                         | 25  | 10 | 5  | 41.22  | b2b3y3y4y8                                            | 1135.61 | 75.344  | 25014  | 2 | 568.31  | -3.98  |
| P0A2B3 RS7_SALTY 30S ribosomal protein S7                 | 4  |                       | WIVEAAR                            | 102 | 7  | 4  | 41.34  | b5y3y5°y5                                             | 844.46  | 49.779  | 53495  | 2 | 422.73  | -13.73 |
| P0A2B3 RS7_SALTY 30S ribosomal protein S7                 | 5  |                       | FGSELLAK                           | 17  | 8  | 3  | 41.71  | y3y4y7                                                | 864.47  | 51.061  | 52967  | 2 | 432.74  | -16.80 |
| P0A2B3 RS7_SALTY 30S ribosomal protein S7                 | 6  |                       | NALAMR                             | 96  | 6  | 2  | 27.43  | b5y5                                                  | 675.36  | 35.561  | 7439   | 1 | 675.36  | -6.33  |
| P0A2B3 RS7_SALTY 30S ribosomal protein S7                 | 7  |                       | ILPDPK                             | 11  | 6  | 1  | 13.9   | y4                                                    | 682.41  | 31.720  | 3471   | 1 | 682.41  | -3.76  |
| P0A2B3 RS7_SALTY 30S ribosomal protein S7                 | 8  |                       | EDVHRMAEANK                        | 138 | 11 | 7  | 39.38  | b3b10°b10y3°y3y4°y4                                   | 1299.60 | 29.356  | 117594 | 2 | 650.30  | -10.24 |
| P0A2B3 RS7_SALTY 30S ribosomal protein S7                 | 9  |                       | RVGGSTYQVPVEVRPVR                  | 78  | 17 | 11 | 84.17  | b5°b5b6°b6b7b8b9°b9y5y8y9                             | 1899.04 | 48.728  | 48038  | 3 | 633.69  | -8.03  |

|                                                              |    |                      |                                 |     |    |    |       |                                      |         |         |       |   |         |        |
|--------------------------------------------------------------|----|----------------------|---------------------------------|-----|----|----|-------|--------------------------------------|---------|---------|-------|---|---------|--------|
| [P0A2B3]RS7_SALTY 30S ribosomal protein S7                   | 10 |                      | KSTAESIVYSALETLAQR              | 35  | 18 | 5  | 41.33 | b7b8b11y5y6                          | 1967.02 | 96.969  | 18971 | 3 | 656.35  | -11.48 |
| [P0A2B3]RS7_SALTY 30S ribosomal protein S7                   | 11 |                      | AFAHYRW                         | 149 | 7  | 4  | 57.87 | b3b5y4y5                             | 950.46  | 50.916  | 3980  | 2 | 475.73  | -7.83  |
| [P67912]HLDD_SALTY ADP-L-glycero-D-manno-heptose-6-epimerase | 1  |                      | FLFDEYVR                        | 144 | 8  | 7  | 82.29 | b4b7y4y5y6y7y8                       | 1088.54 | 76.855  | 10347 | 2 | 544.77  | -4.60  |
| [P67912]HLDD_SALTY ADP-L-glycero-D-manno-heptose-6-epimerase | 2  |                      | TVAEGVTEYMAWLN RDA              | 293 | 17 | 9  | 35.22 | b1°b1b3b5y8°y8y9°y9y16               | 1925.92 | 97.150  | 9447  | 2 | 963.47  | 9.70   |
| [P67912]HLDD_SALTY ADP-L-glycero-D-manno-heptose-6-epimerase | 3  |                      | SGIFNLGTGR                      | 229 | 10 | 7  | 59.52 | b3°b3y3y5y6y7y10                     | 1021.54 | 64.000  | 8580  | 2 | 511.27  | -6.33  |
| [P67912]HLDD_SALTY ADP-L-glycero-D-manno-heptose-6-epimerase | 4  | Carbamidomethyl+C(6) | ELLHYCLEREIPFLYASSAATYGG R      | 98  | 25 | 5  | 28.4  | b8y6y8y11y13                         | 2916.46 | 110.834 | 2554  | 3 | 972.82  | 7.37   |
| [P67912]HLDD_SALTY ADP-L-glycero-D-manno-heptose-6-epimerase | 5  |                      | AESFQAVADATLAYHK                | 239 | 16 | 4  | 17.79 | b3°b3b14y8                           | 1721.82 | 90.645  | 14317 | 3 | 574.61  | -17.51 |
| [P67912]HLDD_SALTY ADP-L-glycero-D-manno-heptose-6-epimerase | 6  |                      | YQAFTQADLTNLR                   | 271 | 13 | 3  | 26.12 | b3y9y10                              | 1540.78 | 65.110  | 12739 | 2 | 770.89  | 4.12   |
| [P67912]HLDD_SALTY ADP-L-glycero-D-manno-heptose-6-epimerase | 7  |                      | QILPEANSQIVGFR                  | 152 | 14 | 4  | 27.74 | y4y11y12*y12                         | 1571.86 | 68.875  | 8296  | 2 | 786.43  | 2.95   |
| [P67912]HLDD_SALTY ADP-L-glycero-D-manno-heptose-6-epimerase | 8  |                      | DFVYVGDVAAVNLWFLESGK            | 209 | 20 | 3  | 24.31 | b4b5b7                               | 2229.13 | 86.857  | 1837  | 2 | 1115.07 | 4.27   |
| [P67912]HLDD_SALTY ADP-L-glycero-D-manno-heptose-6-epimerase | 9  |                      | EYEKPLNVYGYSK                   | 131 | 13 | 3  | 21.35 | b3b10y11                             | 1589.78 | 73.616  | 1740  | 3 | 530.60  | -0.69  |
| [P67912]HLDD_SALTY ADP-L-glycero-D-manno-heptose-6-epimerase | 10 |                      | EIPFLYASSAATYGG R               | 107 | 16 | 3  | 24.32 | b12b13y14                            | 1702.87 | 110.915 | 1574  | 2 | 851.94  | 15.91  |
| [P67912]HLDD_SALTY ADP-L-glycero-D-manno-heptose-6-epimerase | 11 |                      | DFVYVGDVAAVNLWFLESGKSGI FNLGTGR | 209 | 30 | 7  | 33.28 | b3b4°b4b7°b7b9b11                    | 3231.67 | 94.518  | 4480  | 3 | 1077.89 | 5.67   |
| [P67912]HLDD_SALTY ADP-L-glycero-D-manno-heptose-6-epimerase | 12 |                      | AESFQAVADATLAYHKK               | 239 | 17 | 3  | 25.57 | b3b13b14                             | 1849.95 | 89.734  | 2607  | 3 | 617.32  | 1.58   |
| [P67912]HLDD_SALTY ADP-L-glycero-D-manno-heptose-6-epimerase | 13 |                      | TVAEGVTEYMAWLN RDA              | 293 | 17 | 5  | 23.83 | b7b14y7*y7y13                        | 1925.92 | 98.668  | 1880  | 3 | 642.64  | 4.56   |
| [P67912]HLDD_SALTY ADP-L-glycero-D-manno-heptose-6-epimerase | 14 |                      | RDFVYVGDVAAVNLWFLESGK           | 208 | 21 | 7  | 37.65 | b5b7b9b10°b10y7y11                   | 2385.21 | 111.370 | 1558  | 2 | 1193.11 | -7.37  |
| [P67912]HLDD_SALTY ADP-L-glycero-D-manno-heptose-6-epimerase | 15 | Oxidation+M(3)       | GSMASVAFHLNTQLNNGESPK           | 178 | 21 | 4  | 31.6  | y5y7y14y17                           | 2218.09 | 105.546 | 2273  | 2 | 1109.55 | 13.32  |
| [Q8ZLM1]RS13_SALTY 30S ribosomal protein S13                 | 1  |                      | ISELSEEQIDTLRDE VAK             | 44  | 18 | 12 | 77.56 | b3°b3b11b15b16y1y14y15 y16*y16y17y18 | 2075.04 | 66.095  | 55709 | 3 | 692.35  | -6.82  |
| [Q8ZLM1]RS13_SALTY 30S ribosomal protein S13                 | 2  |                      | ISELSEEQIDTLR                   | 44  | 13 | 5  | 21.35 | b6y9y12*y12y13                       | 1532.79 | 78.046  | 11797 | 2 | 766.90  | 6.77   |
| [Q8ZLM1]RS13_SALTY 30S ribosomal protein S13                 | 3  |                      | ISELSEEQIDTLRDE VAK             | 44  | 18 | 4  | 30.03 | b8b9y6y12                            | 2075.04 | 53.073  | 1636  | 3 | 692.35  | -6.59  |
| [Q7CQ01]CLPB_SALTY Chaperone protein clpB                    | 1  |                      | VFVAEPSVEDTIAILR                | 335 | 16 | 7  | 36.68 | b2b3b5y4y12°y12y13                   | 1758.98 | 88.214  | 15521 | 2 | 879.99  | 7.01   |
| [Q7CQ01]CLPB_SALTY Chaperone protein clpB                    | 2  |                      | LVGAPPGYVG YEEGGYLTEAVR         | 645 | 22 | 5  | 13.9  | b3b14y2y10y22                        | 2297.14 | 120.464 | 11574 | 3 | 766.38  | -2.66  |



|                                          |    |                       |                                  |     |    |   |       |                                    |         |         |        |   |         |        |
|------------------------------------------|----|-----------------------|----------------------------------|-----|----|---|-------|------------------------------------|---------|---------|--------|---|---------|--------|
| Q7CQ01 CLPB_SALTY Chaperone protein clpB | 3  |                       | QYSELEEEWK                       | 453 | 10 | 4 | 29.46 | b5y6y7y10                          | 1340.59 | 78.935  | 8260   | 3 | 447.54  | -6.74  |
| Q7CQ01 CLPB_SALTY Chaperone protein clpB | 4  |                       | LPQVEGTGGDVQPSSSELVR             | 70  | 19 | 5 | 15.48 | b11*b11y7y14y19                    | 1968.02 | 56.241  | 6010   | 2 | 984.51  | 9.49   |
| Q7CQ01 CLPB_SALTY Chaperone protein clpB | 5  |                       | AGLSDPNRPIGSFLFLGPTGVGK          | 588 | 23 | 4 | 23.57 | b3b4b8y23                          | 2300.22 | 86.905  | 5319   | 3 | 767.41  | -7.32  |
| Q7CQ01 CLPB_SALTY Chaperone protein clpB | 6  |                       | AIQQQIENPLAQQLSGELVPGK           | 819 | 23 | 6 | 38.65 | b2b3b4b5b12y3                      | 2474.33 | 90.258  | 5023   | 3 | 825.45  | -11.15 |
| Q7CQ01 CLPB_SALTY Chaperone protein clpB | 7  |                       | MLEGEREK                         | 550 | 8  | 6 | 36.94 | b3*b3b8y4y7y8                      | 991.48  | 39.239  | 4168   | 2 | 496.24  | -8.93  |
| Q7CQ01 CLPB_SALTY Chaperone protein clpB | 8  |                       | LEQQALMKESDEASK                  | 423 | 15 | 8 | 86.73 | b3b5b7b11b14y9y13y14               | 1706.84 | 81.587  | 3211   | 2 | 853.92  | 8.15   |
| Q7CQ01 CLPB_SALTY Chaperone protein clpB | 9  | Carbamidomethyl+C(5)  | GELHCVGATTLDEYR                  | 305 | 15 | 6 | 38.36 | b4b8b9*b9y5y7                      | 1720.78 | 41.984  | 1971   | 2 | 860.90  | -6.60  |
| Q7CQ01 CLPB_SALTY Chaperone protein clpB | 10 |                       | GDNFISSELFVLAALESR               | 101 | 18 | 4 | 25.07 | b6b7b9*b9                          | 1967.99 | 121.279 | 1649   | 2 | 984.50  | -8.31  |
| Q7CQ01 CLPB_SALTY Chaperone protein clpB | 11 |                       | QEGNVILFIDELHTMVGAGK             | 268 | 20 | 3 | 23.02 | b4y8y9                             | 2171.13 | 91.937  | 45767  | 3 | 724.38  | 7.53   |
| Q7CQ01 CLPB_SALTY Chaperone protein clpB | 12 |                       | VIGQNEAVEAVSNAIR                 | 569 | 16 | 4 | 17.79 | b3y5*y5y12                         | 1669.88 | 101.221 | 27086  | 2 | 835.44  | -6.51  |
| Q7CQ01 CLPB_SALTY Chaperone protein clpB | 13 |                       | GVLNDLAK                         | 260 | 8  | 3 | 41.71 | b3b6b7                             | 829.48  | 42.056  | 10228  | 2 | 415.24  | 1.69   |
| Q7CQ01 CLPB_SALTY Chaperone protein clpB | 14 |                       | AHPDVFNILLQVLDDGR                | 681 | 17 | 3 | 25.57 | b3b6b7                             | 1921.98 | 94.064  | 8660   | 3 | 641.33  | -15.12 |
| Q7CQ01 CLPB_SALTY Chaperone protein clpB | 15 |                       | IDEVVVFHPLGEQHIASIAQIQLQR        | 756 | 25 | 5 | 40.84 | b3b4b8b9y7                         | 2840.53 | 70.284  | 5452   | 4 | 710.89  | -3.35  |
| Q7CQ01 CLPB_SALTY Chaperone protein clpB | 16 |                       | GYEIHISDEALK                     | 789 | 12 | 4 | 26.99 | b4*b4b5y5                          | 1374.70 | 88.124  | 4036   | 2 | 687.85  | 5.42   |
| Q7CQ01 CLPB_SALTY Chaperone protein clpB | 17 |                       | ASLSGTQTIK                       | 466 | 10 | 3 | 42.47 | b3b5b8                             | 1005.54 | 61.525  | 2679   | 2 | 503.27  | -17.42 |
| Q7CQ01 CLPB_SALTY Chaperone protein clpB | 18 |                       | DAALER                           | 325 | 6  | 1 | 13.9  | b4                                 | 674.34  | 38.310  | 2359   | 1 | 674.34  | -2.81  |
| Q7CQ01 CLPB_SALTY Chaperone protein clpB | 19 |                       | YRGEFEER                         | 250 | 8  | 5 | 36.94 | b4y4°y4y7°y7                       | 1085.49 | 59.730  | 9638   | 2 | 543.25  | -7.87  |
| Q7CQ01 CLPB_SALTY Chaperone protein clpB | 20 |                       | VGDLARMSELQYGK                   | 491 | 14 | 4 | 19.96 | b4b6y6*y6                          | 1566.79 | 56.551  | 8125   | 3 | 522.94  | -2.26  |
| Q7CQ01 CLPB_SALTY Chaperone protein clpB | 21 | Carbamidomethyl+C(27) | AGLSDPNRPIGSFLFLGPTGVGKT<br>ELCK | 588 | 28 | 3 | 12    | b5y7y11                            | 2931.56 | 114.847 | 5853   | 3 | 977.86  | 6.25   |
| Q7CQ01 CLPB_SALTY Chaperone protein clpB | 22 |                       | QLEAATQSEGKTMR                   | 511 | 14 | 4 | 31.73 | b9y3y4y7                           | 1549.77 | 73.293  | 4841   | 2 | 775.39  | 1.58   |
| Q7CQ01 CLPB_SALTY Chaperone protein clpB | 23 |                       | GTLTDLKSAGATTANITQAIEQM<br>R     | 119 | 25 | 3 | 19.01 | y3y5y11                            | 2604.37 | 73.364  | 3719   | 3 | 868.79  | 0.38   |
| Q7CQ01 CLPB_SALTY Chaperone protein clpB | 24 |                       | TVDFRNTVVIMTSNLGSDLIQER          | 705 | 23 | 5 | 27.26 | b5b6y8y12°y12                      | 2608.31 | 96.530  | 1752   | 2 | 1304.66 | -12.92 |
| Q7CQ01 CLPB_SALTY Chaperone protein clpB | 25 |                       | RGDNFISSELFVLAALESR              | 100 | 19 | 7 | 24.5  | b3*b3b6°b6*b6b10y5                 | 2124.13 | 105.032 | 1662   | 3 | 708.71  | 8.85   |
| Q7CQ01 CLPB_SALTY Chaperone protein clpB | 26 | Phosphoryl STY(10)    | MKEMVLGVVSQNFRPEFINR             | 736 | 20 | 4 | 28.72 | b3b11_H3PO4<br>b11y10y11_H3PO4 y11 | 2474.16 | 102.029 | 10740  | 3 | 825.39  | -13.91 |
| Q7CQ01 CLPB_SALTY Chaperone protein clpB | 27 | Phosphoryl STY(18)    | LVGAPPGYVGYEEGGYLTEAVR           | 645 | 22 | 6 | 18.94 | b13b16°b16y6°y6y13                 | 2377.12 | 88.209  | 10684  | 4 | 595.04  | 8.01   |
| Q7CQ01 CLPB_SALTY Chaperone protein clpB | 28 | Phosphoryl STY(7)     | NTVVIMTSNLGSDLIQER               | 710 | 18 | 3 | 16.15 | b6y9y11                            | 2069.96 | 74.365  | 9939   | 4 | 518.25  | -11.20 |
| Q7CQ01 CLPB_SALTY Chaperone protein clpB | 29 | Phosphoryl STY(12)    | VIGQNEAVEAVSNAIRR                | 569 | 17 | 4 | 28.3  | b4b5b10y6                          | 1905.96 | 59.264  | 6782   | 3 | 635.99  | 8.26   |
| Q7CQ01 CLPB_SALTY Chaperone protein clpB | 30 | Phosphoryl STY(8)     | QLEAATQSEGK                      | 511 | 11 | 6 | 37.8  | b3*b3b4b7_H3PO4<br>b7y3°y3         | 1241.52 | 65.044  | 2391   | 3 | 414.51  | -8.16  |
| Q7CQ01 CLPB_SALTY Chaperone protein clpB | 31 | Oxidation+M(1)        | MQIDSKPEELDR                     | 402 | 12 | 3 | 23.01 | b3b11y9                            | 1476.69 | 42.905  | 271284 | 3 | 492.90  | -5.54  |

|                                                                   |    |                 |                                                  |     |    |    |       |                                          |         |         |       |   |         |        |
|-------------------------------------------------------------------|----|-----------------|--------------------------------------------------|-----|----|----|-------|------------------------------------------|---------|---------|-------|---|---------|--------|
| Q7CQ01 CLPB_SALTY Chaperone protein clpB                          | 32 | Oxidation+M(16) | SAGATTANITQAIEQMR                                | 127 | 17 | 6  | 35.22 | b3b4°b4b9y4y6                            | 1778.88 | 34.367  | 27498 | 4 | 445.48  | 6.59   |
| P0A2C7 POTD_SALTY ermidine/putrescine-binding periplasmic protein | 1  |                 | EVAETIGYPTPNLAAR                                 | 285 | 16 | 6  | 38.26 | b7b8y1y8y9*y9                            | 1701.88 | 60.888  | 21187 | 2 | 851.44  | -0.72  |
| P0A2C7 POTD_SALTY ermidine/putrescine-binding periplasmic protein | 2  |                 | LTNFHNLDP EMLNKPFDPNNDYS<br>VPYIWGATAIGVNSDAIDPK | 103 | 43 | 4  | 10.88 | b8b21y2y11                               | 4803.33 | 94.652  | 12565 | 4 | 1201.59 | 6.00   |
| P0A2C7 POTD_SALTY ermidine/putrescine-binding periplasmic protein | 3  |                 | TYKDGAYDLVVPSTYYVDK                              | 70  | 19 | 4  | 21.55 | b4b11y5y8                                | 2197.07 | 68.357  | 6679  | 2 | 1099.04 | 1.44   |
| P0A2C7 POTD_SALTY ermidine/putrescine-binding periplasmic protein | 4  |                 | TITSWADLWKPEYK                                   | 146 | 14 | 9  | 96.56 | b6b7y4y6y8°y8y10y11y12                   | 1737.85 | 82.079  | 52384 | 3 | 579.96  | -17.77 |
| P0A2C7 POTD_SALTY ermidine/putrescine-binding periplasmic protein | 5  |                 | NSLLLTDDAR                                       | 160 | 10 | 3  | 29.46 | b3y5y6                                   | 1117.58 | 52.488  | 4148  | 2 | 559.30  | -0.87  |
| P0A2C7 POTD_SALTY ermidine/putrescine-binding periplasmic protein | 6  |                 | LGYSGNTTDPK                                      | 179 | 11 | 6  | 39.38 | b3b8°b8y9°y9y10                          | 1152.56 | 30.200  | 3901  | 2 | 576.78  | 8.26   |
| P0A2C7 POTD_SALTY ermidine/putrescine-binding periplasmic protein | 7  |                 | KLMPNVA AFNSDNPANPYMEGE<br>VNLGMVWNGSAFVAR       | 200 | 37 | 3  | 10.93 | b12b14y13                                | 4010.88 | 94.503  | 99902 | 4 | 1003.48 | -5.11  |
| P0A2C7 POTD_SALTY ermidine/putrescine-binding periplasmic protein | 8  |                 | VIYSTYESNETMYAKLK                                | 53  | 17 | 6  | 23.83 | b11°b11b14y9*y9y11                       | 2040.02 | 79.111  | 2677  | 3 | 680.68  | 9.51   |
| Q8ZK81 RS18_SALTY 30S ribosomal protein S18                       | 1  |                 | YLSLLPYTDR                                       | 63  | 10 | 8  | 62.53 | b2b3y1y5y6y8y9y10                        | 1240.66 | 74.651  | 46669 | 2 | 620.83  | -0.79  |
| Q8ZK81 RS18_SALTY 30S ribosomal protein S18                       | 2  |                 | NYITESGK                                         | 30  | 8  | 6  | 41.71 | b1b2y3y4y6y8                             | 911.46  | 28.068  | 13518 | 2 | 456.23  | 11.72  |
| Q8ZK81 RS18_SALTY 30S ribosomal protein S18                       | 3  |                 | FTAEGVQEIDYK                                     | 12  | 12 | 5  | 33.23 | b3b10y3°y3y6                             | 1399.65 | 45.164  | 1784  | 2 | 700.33  | -15.52 |
| Q8ZK81 RS18_SALTY 30S ribosomal protein S18                       | 4  |                 | DIATLKNYITESGK                                   | 24  | 14 | 4  | 25.4  | b3b4°b4y12                               | 1552.80 | 71.339  | 10636 | 3 | 518.27  | -12.18 |
| O68926 BFR_SALTY Bacterioferritin                                 | 1  |                 | LLGNELVAINQYFLHAR                                | 13  | 17 | 5  | 10    | b3y2y8*y8y17                             | 1971.06 | 95.603  | 10945 | 3 | 657.69  | -11.70 |
| O68926 BFR_SALTY Bacterioferritin                                 | 2  |                 | ILFLEGIPNLQDLGK                                  | 61  | 15 | 8  | 49.16 | b1b2b3b6y3y4y6y8                         | 1669.97 | 100.473 | 8583  | 2 | 835.49  | 9.50   |
| O68926 BFR_SALTY Bacterioferritin                                 | 3  |                 | EAIAYADSVHDYVSR                                  | 102 | 15 | 3  | 24.81 | b8b9y7                                   | 1695.82 | 48.759  | 5203  | 3 | 565.95  | 14.83  |
| O68926 BFR_SALTY Bacterioferritin                                 | 4  |                 | NWGLTR                                           | 33  | 6  | 1  | 13.9  | y5                                       | 746.40  | 28.149  | 2179  | 1 | 746.40  | 14.07  |
| O68926 BFR_SALTY Bacterioferritin                                 | 5  |                 | NWGLTRLNDVEYHESIDEMK                             | 33  | 20 | 3  | 14.89 | b3b10y9                                  | 2449.12 | 76.630  | 6858  | 3 | 817.05  | -9.77  |
| O68926 BFR_SALTY Bacterioferritin                                 | 6  |                 | DLREAIYADSVHDYVSR                                | 99  | 18 | 3  | 23.55 | b7y5y6                                   | 2080.01 | 82.809  | 3798  | 2 | 1040.51 | -2.11  |
| O68926 BFR_SALTY Bacterioferritin                                 | 7  | Oxidation+M(10) | LGIGEDVEEMLR                                     | 76  | 12 | 4  | 23.01 | b9°b9y4y8                                | 1376.68 | 59.722  | 3887  | 2 | 688.85  | 7.98   |
| P0A2F0 RPOE_SALTY RNA polymerase sigma-E factor                   | 1  |                 | RPPSSDVDAIEAENFESGGALKEIS<br>NPENLMLSEELR        | 91  | 37 | 13 | 54.18 | b6°b6b7b8b9°b9b12b14y1<br>y10*y11y15*y15 | 4043.93 | 95.676  | 49219 | 4 | 1011.74 | -5.61  |
| P0A2F0 RPOE_SALTY RNA polymerase sigma-E factor                   | 2  |                 | MSEQLTDQVLVER                                    | 0   | 13 | 7  | 35.82 | b2b9b10°b10°b10b11y13                    | 1547.79 | 66.157  | 10402 | 3 | 516.60  | 7.57   |
| P0A2F0 RPOE_SALTY RNA polymerase sigma-E factor                   | 3  |                 | RPPSSDVDAIEAENFESGGALK                           | 91  | 22 | 3  | 13.9  | b4b6y9                                   | 2289.10 | 98.545  | 2288  | 3 | 763.70  | -1.81  |
| P0A2F0 RPOE_SALTY RNA polymerase sigma-E factor                   | 4  |                 | EISNPENLMLSEELR                                  | 113 | 15 | 8  | 38.36 | b3°b3b9y5y6°y6y10°y10                    | 1773.87 | 114.032 | 1962  | 2 | 887.44  | 3.17   |
| P0A2F0 RPOE_SALTY RNA polymerase sigma-E factor                   | 5  |                 | ALDSFRGDSAFYTWLYR                                | 59  | 17 | 4  | 25.57 | b6°b6b7b11                               | 2067.99 | 83.350  | 2441  | 3 | 690.00  | -2.95  |

|                                                          |    |                                              |                                   |     |    |    |       |                                     |         |        |        |   |         |        |
|----------------------------------------------------------|----|----------------------------------------------|-----------------------------------|-----|----|----|-------|-------------------------------------|---------|--------|--------|---|---------|--------|
| [P0A2F0]RPOE_SALTY RNA polymerase sigma-E factor         | 6  | Phosphoryl STY(14)                           | YVPSGDVPDVVQESFIK                 | 39  | 17 | 4  | 28.3  | b5b12b13_H3PO4 b13y9                | 1958.91 | 84.005 | 2512   | 3 | 653.64  | 4.42   |
| [P0A2F0]RPOE_SALTY RNA polymerase sigma-E factor         | 7  | Carbamidomethyl+C(16)<br>;Oxidation+M(14)    | ELDGLSYEEIAAIMDCPVGTVR            | 149 | 22 | 5  | 13.9  | b3°b3b5°b5y12                       | 2454.17 | 66.359 | 59066  | 4 | 614.30  | 7.86   |
| [Q8ZRN1]METQ_SALTY D-methionine-binding lipoprotein metQ | 1  |                                              | LKDGVGLLPTSLDIVENPK               | 156 | 19 | 10 | 48.36 | b4b5y1y2y4y5y7°y7y11y19             | 2008.12 | 79.013 | 43257  | 3 | 670.04  | -8.15  |
| [Q8ZRN1]METQ_SALTY D-methionine-binding lipoprotein metQ | 2  |                                              | SLLLLQK                           | 144 | 7  | 4  | 21.79 | b3°b3y5y7                           | 814.53  | 63.127 | 16399  | 2 | 407.77  | -11.54 |
| [Q8ZRN1]METQ_SALTY D-methionine-binding lipoprotein metQ | 3  |                                              | FVQAYQSDEVYEAANK                  | 245 | 16 | 8  | 43.89 | b7y2y6*y6y10y11y12y16               | 1861.86 | 50.829 | 14969  | 2 | 931.43  | 0.72   |
| [Q8ZRN1]METQ_SALTY D-methionine-binding lipoprotein metQ | 4  |                                              | DGIFVEDKDSPYVNLIVTREDNK           | 215 | 23 | 3  | 19.89 | b4b8b12                             | 2666.29 | 92.280 | 12652  | 3 | 889.44  | -14.47 |
| [Q8ZRN1]METQ_SALTY D-methionine-binding lipoprotein metQ | 5  |                                              | VGIVVGAEQQVAEVAQK                 | 34  | 17 | 4  | 16.91 | b2b3b13y12                          | 1724.95 | 67.366 | 5917   | 2 | 862.98  | -4.53  |
| [Q8ZRN1]METQ_SALTY D-methionine-binding lipoprotein metQ | 6  |                                              | DGIFVEDKDSPYVNLIVTREDNKD<br>AENVK | 215 | 29 | 4  | 15.1  | b10b13y6y11                         | 3322.61 | 89.106 | 1592   | 3 | 1108.21 | -8.82  |
| [Q8ZRN1]METQ_SALTY D-methionine-binding lipoprotein metQ | 7  | Carbamidomethyl+C(17)                        | TFAAVGALIGSLALAGCGQDEK            | 6   | 22 | 3  | 13.9  | b4b12y3                             | 2149.06 | 42.027 | 30943  | 4 | 538.02  | -18.52 |
| [Q8ZRN1]METQ_SALTY D-methionine-binding lipoprotein metQ | 8  |                                              | DGSQVAVPNDPTNLGR                  | 128 | 16 | 6  | 36.01 | b12b14y7*y7y10y12                   | 1639.80 | 80.083 | 13067  | 2 | 820.40  | -3.13  |
| [Q8ZRN1]METQ_SALTY D-methionine-binding lipoprotein metQ | 9  |                                              | DPNHIK                            | 28  | 6  | 2  | 27.43 | b3b4                                | 723.37  | 69.335 | 5965   | 1 | 723.37  | -11.39 |
| [Q8ZRN1]METQ_SALTY D-methionine-binding lipoprotein metQ | 10 |                                              | DGVGLLPTSLDIVENPK                 | 158 | 17 | 5  | 30.82 | b6b14y10y11°y11                     | 1766.95 | 85.082 | 3340   | 2 | 883.98  | -1.04  |
| [Q8ZRN1]METQ_SALTY D-methionine-binding lipoprotein metQ | 11 |                                              | DSPYVNLIVTREDNK                   | 223 | 15 | 4  | 30.4  | b4y3y4y14                           | 1762.91 | 91.930 | 100259 | 2 | 881.96  | 7.48   |
| [Q8ZRN1]METQ_SALTY D-methionine-binding lipoprotein metQ | 12 |                                              | SLDELKDGSQVAVPNDPTNLGR            | 122 | 22 | 7  | 36.4  | b4b5b9b13y6y9*y9                    | 2325.19 | 57.745 | 5109   | 2 | 1163.10 | 9.66   |
| [Q8ZRN1]METQ_SALTY D-methionine-binding lipoprotein metQ | 13 | Phosphoryl STY(10)                           | LKDGVGLLPTSLDIVENPK               | 156 | 19 | 3  | 22.44 | y7y9y11                             | 2088.11 | 84.391 | 266660 | 3 | 696.71  | 10.76  |
| [Q8ZRN1]METQ_SALTY D-methionine-binding lipoprotein metQ | 14 | Carbamidomethyl+C(17)<br>;Phosphoryl STY(11) | TFAAVGALIGSLALAGCGQDEKD<br>PNHIK  | 6   | 28 | 4  | 17.93 | b12y12_H3PO4<br>y12y14_H3PO4 y14y16 | 2933.41 | 52.556 | 164409 | 5 | 587.49  | -0.58  |
| [Q8ZRN1]METQ_SALTY D-methionine-binding lipoprotein metQ | 15 | Phosphoryl STY(10)                           | DGIFVEDKDSPYVNLIVTREDNKD<br>AENVK | 215 | 29 | 5  | 31.2  | b8b9y4y8y12                         | 3402.64 | 98.695 | 18424  | 4 | 851.42  | 12.27  |
| [P37412]LEU3_SALTY 3-isopropylmalate dehydrogenase       | 1  |                                              | WENLPPEQPER                       | 80  | 12 | 8  | 26.99 | b10y1y6*y6y7°y7*y7y12               | 1481.69 | 63.019 | 58142  | 3 | 494.57  | -5.19  |
| [P37412]LEU3_SALTY 3-isopropylmalate dehydrogenase       | 2  |                                              | ITTSHYDVGGAIDNHHGHLPK             | 37  | 22 | 10 | 31.74 | b5°b5b7b9°b9b11y1y2y9°y<br>9        | 2342.16 | 50.916 | 27643  | 4 | 586.29  | -13.86 |
| [P37412]LEU3_SALTY 3-isopropylmalate dehydrogenase       | 3  | Carbamidomethyl+C(9)                         | LYQGLEAFCPLR                      | 112 | 12 | 7  | 52.5  | b3b7b9y2y8y9y12                     | 1466.76 | 77.412 | 9412   | 2 | 733.88  | 8.16   |
| [P37412]LEU3_SALTY 3-isopropylmalate dehydrogenase       | 4  |                                              | YSLDANDAATAIEQAINR                | 310 | 18 | 6  | 16.15 | b2°b2b12y5y11y18                    | 1935.96 | 83.969 | 8719   | 2 | 968.48  | 9.46   |

|                                                       |    |                                             |                                   |     |    |    |       |                         |         |         |       |   |         |        |
|-------------------------------------------------------|----|---------------------------------------------|-----------------------------------|-----|----|----|-------|-------------------------|---------|---------|-------|---|---------|--------|
| [P37412]LEU3_SALTY 3-isopropylmalate dehydrogenase    | 5  |                                             | NIANPIAQLSLALLR                   | 293 | 17 | 11 | 75.72 | b1b2b3b4b5b6b8y5y7y8y17 | 1833.15 | 137.361 | 8396  | 2 | 917.08  | 7.72   |
| [P37412]LEU3_SALTY 3-isopropylmalate dehydrogenase    | 6  |                                             | GAAAVSTDEMGDIIAR                  | 341 | 16 | 3  | 25.49 | b3b9b15                 | 1576.78 | 71.669  | 4019  | 2 | 788.89  | 8.83   |
| [P37412]LEU3_SALTY 3-isopropylmalate dehydrogenase    | 7  | Carbamidomethyl+C(12)                       | ADIAANGFDILCVR                    | 124 | 14 | 6  | 27.74 | b2°b2y9y12*y12y13       | 1534.75 | 88.220  | 3574  | 2 | 767.88  | -11.45 |
| [P37412]LEU3_SALTY 3-isopropylmalate dehydrogenase    | 8  | Carbamidomethyl+C(12)                       | ADIAANGFDILCVRELTTGGIYFGQPK       | 124 | 26 | 3  | 22.27 | b13b14y13               | 2825.40 | 81.988  | 2289  | 2 | 1413.20 | -9.42  |
| [P37412]LEU3_SALTY 3-isopropylmalate dehydrogenase    | 9  |                                             | EIVNDVAK                          | 206 | 8  | 5  | 33.93 | b4y5°y5y6*y6            | 887.48  | 32.531  | 8898  | 2 | 444.24  | -3.37  |
| [P37412]LEU3_SALTY 3-isopropylmalate dehydrogenase    | 10 |                                             | NYHIAVLPGDGIGPEVMAQALK            | 3   | 22 | 5  | 38.79 | b13b14y9y13y14          | 2293.17 | 85.117  | 6914  | 3 | 765.06  | -13.95 |
| [P37412]LEU3_SALTY 3-isopropylmalate dehydrogenase    | 11 |                                             | ELTGGIYFGQPK                      | 138 | 12 | 4  | 23.01 | b4b6°b6y11              | 1309.68 | 46.537  | 2625  | 2 | 655.34  | -1.96  |
| [P37412]LEU3_SALTY 3-isopropylmalate dehydrogenase    | 12 |                                             | TGDLAR                            | 335 | 6  | 1  | 13.9  | b5                      | 632.33  | 29.851  | 2616  | 1 | 632.33  | -2.80  |
| [P37412]LEU3_SALTY 3-isopropylmalate dehydrogenase    | 13 |                                             | EGSGQYЕК                          | 152 | 8  | 6  | 33.93 | b4y4°y4y5°y5*y5         | 897.41  | 59.131  | 1863  | 2 | 449.21  | 19.59  |
| [P37412]LEU3_SALTY 3-isopropylmalate dehydrogenase    | 14 |                                             | ALEEGVR                           | 328 | 7  | 6  | 38.33 | b4°b4b5°b5y4°y4         | 773.42  | 37.856  | 1855  | 2 | 387.22  | 11.60  |
| [P37412]LEU3_SALTY 3-isopropylmalate dehydrogenase    | 15 | Carbamidomethyl+C(6)                        | ATVEGCEQADAILFGSVGGPK             | 59  | 21 | 4  | 24.02 | b3°b3b4b15              | 2106.00 | 82.831  | 1744  | 2 | 1053.50 | -8.81  |
| [P37412]LEU3_SALTY 3-isopropylmalate dehydrogenase    | 16 |                                             | EIVNDVAKTYPDVELAHMYIDNATMQLIK     | 206 | 29 | 3  | 22.99 | b12b13b23               | 3334.68 | 84.200  | 21915 | 5 | 667.74  | 4.54   |
| [P37412]LEU3_SALTY 3-isopropylmalate dehydrogenase    | 17 |                                             | EGSGQYЕКAFDTEVYHR                 | 152 | 17 | 3  | 23.9  | b11y4y5                 | 2015.91 | 71.943  | 13402 | 2 | 1008.46 | -0.61  |
| [P37412]LEU3_SALTY 3-isopropylmalate dehydrogenase    | 18 |                                             | GAAAVSTDEMGDIIARYVAEGV            | 341 | 22 | 6  | 25    | b3b6°b6b7°b7y5          | 2195.07 | 60.998  | 3437  | 3 | 732.36  | 1.00   |
| [P37412]LEU3_SALTY 3-isopropylmalate dehydrogenase    | 19 |                                             | AFDTEVYHRFEIER                    | 160 | 14 | 4  | 19.96 | b4°b4y3y7               | 1811.86 | 71.190  | 3378  | 2 | 906.43  | -5.66  |
| [P37412]LEU3_SALTY 3-isopropylmalate dehydrogenase    | 20 | Carbamidomethyl+C(6)                        | ATVEGCEQADAILFGSVGGPKWENLPPESQPER | 59  | 33 | 3  | 22.36 | b10y4y5                 | 3568.75 | 116.345 | 3137  | 4 | 892.94  | 12.86  |
| [P37412]LEU3_SALTY 3-isopropylmalate dehydrogenase    | 21 |                                             | ALEEGVRTGDLAR                     | 328 | 13 | 4  | 42.36 | b3b4b8b12               | 1386.74 | 64.419  | 2668  | 3 | 462.92  | 2.90   |
| [P37412]LEU3_SALTY 3-isopropylmalate dehydrogenase    | 22 |                                             | FDMRITTSHYDVGGIAIDNHGHLPK         | 33  | 26 | 3  | 23.16 | b4b5b7                  | 2891.41 | 100.813 | 2584  | 3 | 964.48  | -4.81  |
| [P37412]LEU3_SALTY 3-isopropylmalate dehydrogenase    | 23 | Oxidation+M(10)                             | GAAAVSTDEMGDIIAR                  | 341 | 16 | 3  | 26.16 | y3y7y8                  | 1592.74 | 51.917  | 3810  | 2 | 796.88  | -8.97  |
| [P0A9Z4]GLNB_SALTY Nitrogen regulatory protein P-II 1 | 1  |                                             | IFVFDVAR                          | 90  | 8  | 9  | 68.77 | b2y1y3y4y5y6°y6y7y8     | 966.53  | 74.631  | 18963 | 2 | 483.77  | -9.85  |
| [P0A9Z4]GLNB_SALTY Nitrogen regulatory protein P-II 1 | 2  |                                             | LDDVREALAEVGITGMTVTEVK            | 12  | 22 | 4  | 23.77 | b7b10b11y1              | 2346.25 | 136.479 | 1698  | 3 | 782.75  | 10.20  |
| [P0A9Z4]GLNB_SALTY Nitrogen regulatory protein P-II 1 | 3  |                                             | GAEYMVDFLPK                       | 47  | 11 | 5  | 42.39 | b5°b5b6y6y7             | 1269.62 | 79.119  | 12281 | 2 | 635.31  | -1.06  |
| [P0A9Z4]GLNB_SALTY Nitrogen regulatory protein P-II 1 | 4  |                                             | EALAEVGITGMTVTEVK                 | 17  | 17 | 5  | 33.97 | b4b10b14y7y11           | 1747.91 | 121.882 | 11338 | 3 | 583.31  | -3.21  |
| [P0A9Z4]GLNB_SALTY Nitrogen regulatory protein P-II 1 | 5  |                                             | GHTELYRGAEYMVDFLPK                | 40  | 18 | 6  | 33.45 | b5b6°b6b10°b10b13       | 2126.06 | 94.049  | 7789  | 3 | 709.36  | 10.68  |
| [P40720]FUMA_SALTY Fumarate hydratase class I         | 1  | Carbamidomethyl+C(5); Carbamidomethyl+C(13) | HGASCPVGMGVSCSADR                 | 305 | 17 | 9  | 44.11 | b3b5b7y6y8°y8y10°y10y17 | 1747.73 | 35.895  | 12553 | 3 | 583.25  | -1.26  |
| [P40720]FUMA_SALTY Fumarate hydratase class I         | 2  |                                             | VWTGGGDEAALAR                     | 120 | 13 | 4  | 28.83 | b1y6y11y12              | 1302.65 | 47.792  | 10605 | 2 | 651.83  | 4.40   |
| [P40720]FUMA_SALTY Fumarate hydratase class I         | 3  |                                             | TYLYQETK                          | 192 | 8  | 7  | 50.47 | b1b5y2y5y6y7y8          | 1045.52 | 38.745  | 9869  | 2 | 523.26  | 2.34   |
| [P40720]FUMA_SALTY Fumarate hydratase class I         | 4  |                                             | TPEGYASGSLGPTTAGR                 | 426 | 17 | 5  | 25.57 | b2y3y4y10y17            | 1621.79 | 42.836  | 9201  | 2 | 811.40  | 2.41   |
| [P40720]FUMA_SALTY Fumarate hydratase class I         | 5  |                                             | QAFHDASFMLRPAHQQQVADILR           | 52  | 23 | 4  | 27.26 | b7b16y10y11             | 2679.37 | 78.948  | 4272  | 3 | 893.80  | 5.38   |

|                                                  |    |                                                |                                    |     |    |   |       |                              |         |         |       |   |         |        |
|--------------------------------------------------|----|------------------------------------------------|------------------------------------|-----|----|---|-------|------------------------------|---------|---------|-------|---|---------|--------|
| P40720 FUMA_SALTY Fumarate hydratase class I     | 6  | Carbamidomethyl+C(3)                           | LECVEYPELGMEAIWK                   | 499 | 16 | 6 | 36.68 | b4°b4b5b9y4y9                | 1966.95 | 111.485 | 2921  | 3 | 656.32  | 9.31   |
| P40720 FUMA_SALTY Fumarate hydratase class I     | 7  |                                                | NYLVDK                             | 209 | 6  | 2 | 13.9  | b5°b5                        | 751.41  | 26.697  | 5846  | 2 | 376.21  | 9.02   |
| P40720 FUMA_SALTY Fumarate hydratase class I     | 8  | Carbamidomethyl+C(8)                           | SQQVTDACK                          | 466 | 9  | 4 | 31.3  | b3*b3b7y6                    | 1036.48 | 66.079  | 5777  | 1 | 1036.48 | 4.59   |
| P40720 FUMA_SALTY Fumarate hydratase class I     | 9  |                                                | DIAHAK                             | 393 | 6  | 1 | 13.9  | b3                           | 654.35  | 75.087  | 5638  | 1 | 654.35  | -4.48  |
| P40720 FUMA_SALTY Fumarate hydratase class I     | 10 |                                                | YSQNAALDMYK                        | 145 | 11 | 3 | 25.06 | b10y4y7                      | 1303.59 | 22.763  | 5537  | 3 | 435.20  | -7.49  |
| P40720 FUMA_SALTY Fumarate hydratase class I     | 11 |                                                | SNKPFFYQDPFPLK                     | 1   | 14 | 3 | 19.96 | b4b9y9                       | 1727.85 | 84.401  | 5400  | 2 | 864.43  | -16.04 |
| P40720 FUMA_SALTY Fumarate hydratase class I     | 12 |                                                | EVNTGTNLPAQIDLYSVDGDEYK            | 156 | 23 | 3 | 13.48 | b5b8y8                       | 2541.17 | 86.782  | 3983  | 3 | 847.73  | -10.28 |
| P40720 FUMA_SALTY Fumarate hydratase class I     | 13 |                                                | GGNMIR                             | 554 | 6  | 1 | 13.9  | y5                           | 647.32  | 28.909  | 2666  | 1 | 647.32  | -10.09 |
| P40720 FUMA_SALTY Fumarate hydratase class I     | 14 |                                                | HGGFYLGSIGGPAAVLAQGSIK             | 476 | 22 | 3 | 20.41 | b6b13b16                     | 2100.09 | 97.604  | 2646  | 2 | 1050.55 | -18.02 |
| P40720 FUMA_SALTY Fumarate hydratase class I     | 15 |                                                | VWTGGGDEAALARGVYNTYIED NLR         | 120 | 25 | 5 | 12.79 | b23y5°y5*y5y7                | 2740.32 | 93.590  | 83995 | 3 | 914.11  | -3.65  |
| P40720 FUMA_SALTY Fumarate hydratase class I     | 16 |                                                | GGNMIRYFAGER                       | 554 | 12 | 6 | 49.48 | b10b11°b11y3y4y7             | 1370.68 | 66.913  | 28101 | 3 | 457.57  | 14.69  |
| P40720 FUMA_SALTY Fumarate hydratase class I     | 17 |                                                | DHPIYYAGPAKTPEGYASGSLGPT TAGR      | 415 | 28 | 3 | 12    | b5y12y25                     | 2834.39 | 91.959  | 25058 | 3 | 945.47  | 6.98   |
| P40720 FUMA_SALTY Fumarate hydratase class I     | 18 | Carbamidomethyl+C(4)                           | RLECVEYPELGMEAIWK                  | 498 | 17 | 4 | 28.3  | b3b4b9y11                    | 2123.05 | 76.877  | 20382 | 3 | 708.36  | 10.92  |
| P40720 FUMA_SALTY Fumarate hydratase class I     | 19 |                                                | QAFHDASFMLRPAHQQQVADILR DPQASENDK  | 52  | 32 | 4 | 11.33 | b11*b11y11y14                | 3663.77 | 92.991  | 12974 | 4 | 916.70  | -0.67  |
| P40720 FUMA_SALTY Fumarate hydratase class I     | 20 |                                                | GQRVWTTGGGDEAALAR                  | 117 | 16 | 4 | 24.32 | b9°b9b10y12                  | 1643.80 | 66.873  | 4560  | 2 | 822.40  | -13.66 |
| P40720 FUMA_SALTY Fumarate hydratase class I     | 21 |                                                | NYLVDKMR                           | 209 | 8  | 3 | 41.71 | b5b6b7                       | 1038.53 | 46.520  | 2964  | 2 | 519.77  | -13.40 |
| P40720 FUMA_SALTY Fumarate hydratase class I     | 22 | Phosphoryl STY(5)                              | HGGFYLGSIGGPAAVLAQGSIK             | 476 | 22 | 4 | 40.93 | b3b4b11_HPO3 b11b12_HPO3 b12 | 2180.10 | 78.937  | 6146  | 3 | 727.37  | 10.41  |
| P40720 FUMA_SALTY Fumarate hydratase class I     | 23 | Oxidation+M(9)                                 | QAFHDASFMLRPAHQQQVADILR            | 52  | 23 | 3 | 13.48 | b4y11y13                     | 2695.35 | 89.206  | 28439 | 3 | 899.12  | 0.54   |
| P40720 FUMA_SALTY Fumarate hydratase class I     | 24 | Oxidation+M(1)                                 | MSNKPFFYQDPFPLK                    | 0   | 15 | 4 | 38.85 | b6b7b8y9                     | 1874.91 | 69.786  | 3313  | 2 | 937.96  | -1.24  |
| P0A1V6 KPRS_SALTY Ribose-phohate pyrophohokinase | 1  | Carbamidomethyl+C(18) ;Carbamidomethyl+C(32) ) | ANVSQVMHIIGDVAGRDCVLVDD MIDTGGTLCK | 198 | 33 | 8 | 25.34 | b2b4b5b20b24y2y8y33          | 3559.68 | 104.948 | 35753 | 4 | 890.68  | -5.21  |
| P0A1V6 KPRS_SALTY Ribose-phohate pyrophohokinase | 2  |                                                | LYTSLGDAAVGR                       | 22  | 12 | 4 | 30.21 | y5y6y10y12                   | 1222.64 | 52.224  | 21941 | 2 | 611.82  | -5.59  |
| P0A1V6 KPRS_SALTY Ribose-phohate pyrophohokinase | 3  |                                                | ITAVIPYFGYAR                       | 84  | 12 | 3 | 23.01 | b4y5y7                       | 1370.74 | 80.399  | 18459 | 2 | 685.88  | -1.78  |
| P0A1V6 KPRS_SALTY Ribose-phohate pyrophohokinase | 4  |                                                | LFAGNATPELAQR                      | 5   | 13 | 5 | 28.83 | b1y6y10y11y13                | 1387.74 | 53.706  | 17694 | 2 | 694.37  | 2.29   |
| P0A1V6 KPRS_SALTY Ribose-phohate pyrophohokinase | 5  | Carbamidomethyl+C(10)                          | NSVIDEVVVCDTIPTLDEIK               | 262 | 20 | 7 | 23.44 | b2b15y1y5y7y10y20            | 2259.17 | 88.150  | 14095 | 2 | 1130.09 | 9.94   |
| P0A1V6 KPRS_SALTY Ribose-phohate pyrophohokinase | 6  |                                                | VFAYATHPIFSGNAANNLR                | 243 | 19 | 6 | 35.07 | b1y10°y10*y10y11y12          | 2063.03 | 64.837  | 12675 | 3 | 688.35  | -7.81  |
| P0A1V6 KPRS_SALTY Ribose-phohate pyrophohokinase | 7  |                                                | FSDGEVSVQINENVR                    | 34  | 15 | 4 | 32.78 | b10b11y4y12                  | 1692.82 | 86.772  | 1650  | 2 | 846.91  | 2.02   |
| P0A1V6 KPRS_SALTY Ribose-phohate pyrophohokinase | 8  |                                                | AAEALK                             | 231 | 6  | 1 | 13.9  | b4                           | 602.34  | 31.032  | 17812 | 1 | 602.34  | -13.38 |
| P0A1V6 KPRS_SALTY Ribose-phohate pyrophohokinase | 9  |                                                | ANVSQVMHIIGDVAGR                   | 198 | 16 | 3 | 25.49 | y5y7y10                      | 1666.83 | 78.710  | 9164  | 3 | 556.28  | -21.09 |

|                                                   |    |                                             |                                                         |     |    |    |        |                                                       |         |         |        |   |         |        |
|---------------------------------------------------|----|---------------------------------------------|---------------------------------------------------------|-----|----|----|--------|-------------------------------------------------------|---------|---------|--------|---|---------|--------|
| P0A1V6 KPRS_SALTY Ribose-phohate pyrophohokinase  | 10 | Carbamidomethyl+C(2); Carbamidomethyl+C(16) | DCVLVDDMIDTGGTLCK                                       | 214 | 17 | 4  | 16.91  | b4°b4b11y9                                            | 1911.89 | 76.448  | 3392   | 2 | 956.45  | 19.28  |
| P0A1V6 KPRS_SALTY Ribose-phohate pyrophohokinase  | 11 |                                             | LLNDTDMAIIDK                                            | 182 | 12 | 4  | 33.23  | b4b6y3y9                                              | 1361.70 | 97.542  | 2457   | 2 | 681.35  | 3.05   |
| P0A1V6 KPRS_SALTY Ribose-phohate pyrophohokinase  | 12 |                                             | RVFAYATHPIFSGNAANNLR                                    | 242 | 20 | 3  | 23.02  | b7y11y12                                              | 2219.12 | 73.370  | 17071  | 4 | 555.54  | -11.77 |
| P0A1V6 KPRS_SALTY Ribose-phohate pyrophohokinase  | 13 |                                             | ITAVIPYFGYARQDR                                         | 84  | 15 | 5  | 26.87  | y4°y4*y4y6y10                                         | 1769.95 | 84.327  | 16061  | 2 | 885.48  | 10.62  |
| P0A1V6 KPRS_SALTY Ribose-phohate pyrophohokinase  | 14 |                                             | PDMKLFAGNATPELAQR                                       | 1   | 17 | 4  | 16.91  | b9y7*y7y12                                            | 1858.95 | 83.453  | 10096  | 2 | 929.98  | -0.53  |
| P0A1V6 KPRS_SALTY Ribose-phohate pyrophohokinase  | 15 | Carbamidomethyl+C(18);Carbamidomethyl+C(32) | ANVSQVMHIIGDVAGRDCVLVDD MIDTGGTLCK                      | 198 | 33 | 4  | 23.65  | y3y5y9y12                                             | 3559.68 | 89.669  | 3287   | 4 | 890.68  | -5.28  |
| P0A1V6 KPRS_SALTY Ribose-phohate pyrophohokinase  | 16 |                                             | AIALLNDTDMAIIDK                                         | 178 | 16 | 3  | 26.16  | b3b4b11                                               | 1744.93 | 74.584  | 1722   | 2 | 872.97  | -10.56 |
| P0A1V6 KPRS_SALTY Ribose-phohate pyrophohokinase  | 17 | Oxidation+M(7)                              | ANVSQVMHIIGDVAGR                                        | 198 | 16 | 3  | 25.49  | b5b10b14                                              | 1682.84 | 62.271  | 2096   | 3 | 561.62  | -12.91 |
| P0A1V6 KPRS_SALTY Ribose-phohate pyrophohokinase  | 18 | Carbamidomethyl+C(11);Oxidation+M()         | GGDIFIQSTCAPTNDNLMELVVM VDALLR                          | 49  | 30 | 4  | 17.53  | b6b9*b9b11                                            | 3364.72 | 102.774 | 1941   | 3 | 1122.24 | 14.44  |
| P53636 SODC1_SALTY Superoxide dismutase [Cu-Zn] 1 | 1  | Carbamidomethyl+C(3)                        | FACGVIEK                                                | 169 | 8  | 9  | 55.24  | b2y1y2°y2y3y5y6y7y8                                   | 923.45  | 40.576  | 126432 | 2 | 462.23  | -13.48 |
| P53636 SODC1_SALTY Superoxide dismutase [Cu-Zn] 1 | 2  |                                             | EVPALMAGGHLDPEK                                         | 84  | 15 | 9  | 30.4   | b2b11y2y3y8°y8y9°y13y15                               | 1563.77 | 57.028  | 40140  | 3 | 521.93  | -10.77 |
| P53636 SODC1_SALTY Superoxide dismutase [Cu-Zn] 1 | 3  | Carbamidomethyl+C(49)                       | MNDALSSGTGENIGEITVSETPYG LLFTPHLNLTPGIHGFHVHTNPS CMPGMK | 27  | 54 | 5  | 11.55  | b5°b5b16y5y10                                         | 5733.69 | 91.937  | 32125  | 6 | 956.45  | -6.47  |
| P53636 SODC1_SALTY Superoxide dismutase [Cu-Zn] 1 | 4  |                                             | GGDNYSDKPAPLGGGGAR                                      | 151 | 18 | 21 | 197.84 | b4*b4b5*b5b7b8*b8b9b10°b10*b10y3y4y5y6y7y8y9y10y11y12 | 1688.77 | 32.952  | 124321 | 3 | 563.59  | -18.29 |
| P53636 SODC1_SALTY Superoxide dismutase [Cu-Zn] 1 | 5  |                                             | HLGPYNDKGHLGDLPLVVNAD GTATYPLLAPR                       | 102 | 33 | 19 | 138.03 | b3b6b8b10°b10b11b13°b13b17b18b19b22b23y3y4y5y6y8y12   | 3441.77 | 80.555  | 186596 | 4 | 861.20  | -5.75  |
| P53636 SODC1_SALTY Superoxide dismutase [Cu-Zn] 1 | 6  |                                             | EVPALMAGGHLDPEKTGK                                      | 84  | 18 | 6  | 42.31  | b3b10y8y12y13y16                                      | 1849.93 | 52.352  | 23387  | 3 | 617.31  | -11.09 |
| P53636 SODC1_SALTY Superoxide dismutase [Cu-Zn] 1 | 7  |                                             | DGKEVPALMAGGHLDPEK                                      | 81  | 18 | 4  | 22.62  | b7b13y4y11                                            | 1863.92 | 67.467  | 18868  | 2 | 932.46  | -5.37  |
| P53636 SODC1_SALTY Superoxide dismutase [Cu-Zn] 1 | 8  |                                             | PALMAGGHLDPEK                                           | 86  | 13 | 1  | 7.3    | b3                                                    | 1335.68 | 57.048  | 8543   | 2 | 668.34  | 2.65   |
| P53636 SODC1_SALTY Superoxide dismutase [Cu-Zn] 1 | 9  |                                             | EVPALMAGGHLDPEK                                         | 84  | 15 | 1  | 7.3    | y13                                                   | 1545.75 | 57.023  | 8355   | 3 | 515.92  | -9.87  |
| P0A2D1 UCPA_SALTY Oxidoreductase ucpA             | 1  | Carbamidomethyl+C(5)                        | VNAICPGYVR                                              | 179 | 10 | 6  | 56     | y2y5y6y8y9y10                                         | 1148.59 | 44.768  | 9257   | 2 | 574.80  | 4.14   |
| P0A2D1 UCPA_SALTY Oxidoreductase ucpA             | 2  |                                             | LGNFLDMSEEDRDFHIDINIK                                   | 94  | 21 | 5  | 25.5   | b8°b8b9b13y9                                          | 2521.21 | 101.373 | 7607   | 4 | 631.06  | 3.29   |
| P0A2D1 UCPA_SALTY Oxidoreductase ucpA             | 3  |                                             | DFHIDINIK                                               | 106 | 9  | 4  | 46.59  | b5b6b8y4                                              | 1114.59 | 75.122  | 18675  | 2 | 557.80  | 3.50   |
| P0A2D1 UCPA_SALTY Oxidoreductase ucpA             | 4  |                                             | DFASVQAAVAR                                             | 64  | 11 | 3  | 25.06  | b6b8y3                                                | 1134.57 | 107.333 | 1723   | 1 | 1134.57 | -15.06 |
| P0A2D1 UCPA_SALTY Oxidoreductase ucpA             | 5  | Carbamidomethyl+C(5)                        | VNAICPGYVRTPMAESIR                                      | 179 | 19 | 6  | 44.03  | b9b10b14y5y7y8                                        | 2105.05 | 75.898  | 6362   | 3 | 702.35  | -8.35  |
| P0A2D1 UCPA_SALTY Oxidoreductase ucpA             | 6  | Carbamidomethyl+C(17)                       | SLAVEYAQSGIRVNAICPGYVR                                  | 167 | 22 | 3  | 22.65  | b15y6y7                                               | 2423.23 | 97.642  | 5941   | 3 | 808.41  | -8.16  |
| P0A2D1 UCPA_SALTY Oxidoreductase ucpA             | 7  |                                             | ADVRDFASVQAAVAR                                         | 60  | 15 | 4  | 26.87  | b5b9b10°b10                                           | 1575.83 | 86.968  | 4968   | 2 | 788.42  | 1.47   |
| P0A2D1 UCPA_SALTY Oxidoreductase ucpA             | 8  |                                             | LADELGGRGHR                                             | 44  | 11 | 4  | 25.06  | b6b8°b8y9                                             | 1180.62 | 70.626  | 4618   | 2 | 590.81  | -0.41  |
| P0A2D1 UCPA_SALTY Oxidoreductase ucpA             | 9  |                                             | LGNFLDMSEEDRDFHIDINIK                                   | 94  | 21 | 4  | 21.01  | b3*b3b6b20                                            | 2521.18 | 68.778  | 1570   | 3 | 841.07  | -7.75  |

|                                                            |   |                       |                                    |     |    |    |       |                                  |         |         |       |   |         |        |
|------------------------------------------------------------|---|-----------------------|------------------------------------|-----|----|----|-------|----------------------------------|---------|---------|-------|---|---------|--------|
| P63601 AROK_SALTY Shikimate kinase 1                       | 1 |                       | VVANQIIHMLESN                      | 160 | 13 | 6  | 35.09 | b11y2y5y8y10y13                  | 1467.76 | 83.984  | 18155 | 2 | 734.38  | -0.75  |
| P63601 AROK_SALTY Shikimate kinase 1                       | 2 |                       | QGIVLATGGGSVK                      | 73  | 13 | 6  | 46.85 | b3y5y7y8y10y13                   | 1186.68 | 46.984  | 7877  | 2 | 593.84  | -2.47  |
| P63601 AROK_SALTY Shikimate kinase 1                       | 3 |                       | NPLYEEIADVTIR                      | 140 | 13 | 3  | 21.35 | b9b11y9                          | 1532.80 | 74.632  | 3955  | 2 | 766.90  | 1.11   |
| P63601 AROK_SALTY Shikimate kinase 1                       | 4 |                       | NIFLVGPMGAGK                       | 5   | 12 | 3  | 23.01 | b10y8y10                         | 1203.65 | 74.918  | 9996  | 2 | 602.33  | -5.07  |
| P63601 AROK_SALTY Shikimate kinase 1                       | 5 |                       | TGADVGVWVDFVEGEDGFR                | 42  | 18 | 3  | 16.15 | b14y6y10                         | 1955.91 | 72.247  | 2195  | 2 | 978.46  | 17.60  |
| P63601 AROK_SALTY Shikimate kinase 1                       | 6 |                       | TGADVGWVDFVEGEDGFRNR               | 42  | 20 | 3  | 21.68 | b3b8b13                          | 2226.04 | 106.822 | 2045  | 3 | 742.68  | 7.46   |
| P63601 AROK_SALTY Shikimate kinase 1                       | 7 | Oxidation+M(8)        | QLAQQLNMEFYDSDQEIEKR               | 22  | 20 | 4  | 14.89 | b9*b9y7y10                       | 2501.17 | 105.468 | 4701  | 3 | 834.40  | 3.81   |
| P63601 AROK_SALTY Shikimate kinase 1                       | 8 |                       | ATGGGSVK                           | 78  | 8  | 2  | 7.51  | b3*b3                            | 676.36  | 46.999  | 6898  | 1 | 676.36  | 1.99   |
| P58627 YCEF_SALTY Maf-like protein yceF                    | 1 |                       | ASGNIVTFYTGLALYNSASGHLQTEVEPFDVHFR | 94  | 34 | 12 | 35.67 | b3b5b8*b8*b8b10*b10y1y6y11y13y16 | 3740.78 | 95.733  | 13856 | 4 | 935.95  | -13.97 |
| P58627 YCEF_SALTY Maf-like protein yceF                    | 2 | Carbamidomethyl+C(7)  | LTIPFECAAPDVDETPMPGEAPR            | 19  | 23 | 4  | 13.48 | b1b9y6y21                        | 2513.17 | 73.312  | 13384 | 4 | 629.05  | -1.07  |
| P58627 YCEF_SALTY Maf-like protein yceF                    | 3 | Carbamidomethyl+C(6)  | EHPLHCAGSFK                        | 141 | 11 | 3  | 28.07 | b3b4y7                           | 1282.59 | 27.478  | 1505  | 3 | 428.20  | -8.57  |
| P58627 YCEF_SALTY Maf-like protein yceF                    | 4 |                       | QLVLR                              | 42  | 5  | 2  | 27.05 | b3b4                             | 628.41  | 70.604  | 11158 | 1 | 628.41  | -11.07 |
| P58627 YCEF_SALTY Maf-like protein yceF                    | 5 |                       | AQSLAAR                            | 52  | 7  | 7  | 38.33 | b3*b3b4*b4*b4y6*y6               | 716.39  | 36.363  | 10842 | 1 | 716.39  | -16.87 |
| P58627 YCEF_SALTY Maf-like protein yceF                    | 6 |                       | QQLAK                              | 89  | 5  | 1  | 13.53 | b4                               | 587.34  | 51.634  | 5304  | 1 | 587.34  | -14.55 |
| P58627 YCEF_SALTY Maf-like protein yceF                    | 7 | Carbamidomethyl+C(14) | DPNTLIGLPLIALCQMLRR                | 167 | 19 | 6  | 37.14 | b5*b5b6b7*b7y8                   | 2194.20 | 105.114 | 2306  | 4 | 549.31  | -9.68  |
| P58627 YCEF_SALTY Maf-like protein yceF                    | 8 |                       | PMPGEAPR                           | 34  | 8  | 0  | 6.79  |                                  | 854.41  | 73.348  | 1591  | 1 | 854.41  | -6.29  |
| Q8ZLT3 PNP_SALTY Polyribonucleotide nucleotidyltransferase | 1 |                       | ALTEETGTTIEEDDGTVK                 | 577 | 19 | 6  | 21.55 | b7b14y1y3y7y19                   | 2022.01 | 69.757  | 15312 | 2 | 1011.51 | 14.37  |
| Q8ZLT3 PNP_SALTY Polyribonucleotide nucleotidyltransferase | 2 |                       | VTDYLMGQEVVPK                      | 661 | 14 | 4  | 25.4  | b10b11y1y3                       | 1606.82 | 63.880  | 12565 | 2 | 803.92  | 5.09   |
| Q8ZLT3 PNP_SALTY Polyribonucleotide nucleotidyltransferase | 3 |                       | SETIEQLIAEDETLDANELGEILHAI EK      | 274 | 28 | 7  | 15.51 | b2b4b7*b7y3y5y28                 | 3123.56 | 125.747 | 6568  | 3 | 1041.86 | 1.49   |
| Q8ZLT3 PNP_SALTY Polyribonucleotide nucleotidyltransferase | 4 |                       | QATAAVMVSMDDTAVFVTVVGQ KK          | 25  | 24 | 4  | 12.38 | b3*b3*b4b10                      | 2496.29 | 97.215  | 6006  | 2 | 1248.65 | 0.98   |
| Q8ZLT3 PNP_SALTY Polyribonucleotide nucleotidyltransferase | 5 |                       | TDSFLFHYNFPPYSVGETGMVGSP K         | 372 | 25 | 6  | 22.33 | b11*b11b12*b12y1y7               | 2777.32 | 136.546 | 4754  | 2 | 1389.16 | 9.49   |
| Q8ZLT3 PNP_SALTY Polyribonucleotide nucleotidyltransferase | 6 | Carbamidomethyl+C(18) | VVSEITESNGSSSMASVCGASLAL MDAGVPIK  | 426 | 32 | 4  | 11.33 | b1b4b11y3                        | 3167.52 | 87.700  | 4177  | 3 | 1056.51 | -1.70  |
| Q8ZLT3 PNP_SALTY Polyribonucleotide nucleotidyltransferase | 7 |                       | VGYINDQYVLNPTQDELK                 | 153 | 18 | 4  | 16.15 | b6b11y2y7                        | 2109.05 | 70.315  | 2179  | 2 | 1055.03 | -1.39  |
| Q8ZLT3 PNP_SALTY Polyribonucleotide nucleotidyltransferase | 8 |                       | IAATDGEK                           | 596 | 8  | 3  | 33.93 | b5y4y5                           | 804.43  | 37.843  | 13387 | 2 | 402.72  | 20.64  |
| Q8ZLT3 PNP_SALTY Polyribonucleotide nucleotidyltransferase | 9 |                       | IEEITAEIEVGR                       | 611 | 12 | 4  | 23.01 | b4b10y11*y11                     | 1358.75 | 68.233  | 9465  | 2 | 679.88  | 21.65  |

|                                                            |    |                       |                                          |     |    |    |       |                                              |         |         |       |   |         |        |
|------------------------------------------------------------|----|-----------------------|------------------------------------------|-----|----|----|-------|----------------------------------------------|---------|---------|-------|---|---------|--------|
| Q8ZLT3 PNP_SALTY Polyribonucleotide nucleotidyltransferase | 10 |                       | FQYGQHTVTLETGMMAR                        | 8   | 17 | 5  | 27.05 | b7*b7b10b16y10                               | 1969.96 | 79.590  | 6288  | 2 | 985.49  | 18.90  |
| Q8ZLT3 PNP_SALTY Polyribonucleotide nucleotidyltransferase | 11 |                       | GVLAVMPPMDK                              | 409 | 11 | 3  | 36.82 | y4y8y10                                      | 1175.56 | 61.499  | 4936  | 2 | 588.28  | -19.00 |
| Q8ZLT3 PNP_SALTY Polyribonucleotide nucleotidyltransferase | 12 |                       | AKPGQDFFPLTVNYQER                        | 49  | 17 | 5  | 28.3  | b11*b11y3y4y10                               | 2010.00 | 89.651  | 3132  | 4 | 503.25  | -6.38  |
| Q8ZLT3 PNP_SALTY Polyribonucleotide nucleotidyltransferase | 13 |                       | GDISEFAPR                                | 545 | 9  | 6  | 46.59 | b3b4°b4b7°b7y5                               | 991.46  | 97.138  | 3071  | 1 | 991.46  | -21.30 |
| Q8ZLT3 PNP_SALTY Polyribonucleotide nucleotidyltransferase | 14 |                       | YAQVDVIK                                 | 266 | 8  | 4  | 49.22 | b4b5y6y7                                     | 935.51  | 55.793  | 3060  | 2 | 468.26  | -9.66  |
| Q8ZLT3 PNP_SALTY Polyribonucleotide nucleotidyltransferase | 15 |                       | QATAAVMVSMDDTAVFVTVVGQ<br>K              | 25  | 23 | 4  | 37.68 | b4b5b6b13                                    | 2368.23 | 75.810  | 2327  | 2 | 1184.62 | 18.45  |
| Q8ZLT3 PNP_SALTY Polyribonucleotide nucleotidyltransferase | 16 |                       | WDWQPEAVNDALNAR                          | 230 | 15 | 6  | 44.38 | b5b6y10y12y13*y13                            | 1784.87 | 72.313  | 2227  | 2 | 892.94  | 18.81  |
| Q8ZLT3 PNP_SALTY Polyribonucleotide nucleotidyltransferase | 17 |                       | EGDNYVVLSDILGDEHLGDMDF<br>K              | 470 | 24 | 3  | 13.11 | b4y6y13                                      | 2696.23 | 94.452  | 1523  | 2 | 1348.62 | 10.87  |
| Q8ZLT3 PNP_SALTY Polyribonucleotide nucleotidyltransferase | 18 |                       | IEGITKEIMQVALNQAK                        | 510 | 17 | 7  | 35.22 | b5b11y4y5*y5y9*y9                            | 1886.05 | 103.651 | 19138 | 2 | 943.53  | 4.98   |
| Q8ZLT3 PNP_SALTY Polyribonucleotide nucleotidyltransferase | 19 |                       | THGSALFTRGETQALVTATLGTA<br>R             | 336 | 24 | 3  | 13.11 | b3b9y14                                      | 2459.31 | 77.785  | 17789 | 4 | 615.58  | 5.26   |
| Q8ZLT3 PNP_SALTY Polyribonucleotide nucleotidyltransferase | 20 |                       | GGSVIRALTEETGTTIEIEDDGTVK                | 571 | 25 | 3  | 12.79 | b21y7y10                                     | 2591.33 | 85.114  | 8579  | 2 | 1296.17 | 7.82   |
| Q8ZLT3 PNP_SALTY Polyribonucleotide nucleotidyltransferase | 21 |                       | GVLAVMPPMDKFPYTVR                        | 409 | 17 | 5  | 23.83 | b3b9y6y11°y11                                | 1938.97 | 82.013  | 4023  | 3 | 646.99  | -6.42  |
| Q8ZLT3 PNP_SALTY Polyribonucleotide nucleotidyltransferase | 22 |                       | EGDNYVVLSDILGDEHLGDMDF<br>KVAGSR         | 470 | 29 | 3  | 22.22 | b5y12y13                                     | 3166.50 | 94.481  | 1899  | 4 | 792.38  | 11.03  |
| Q8ZLT3 PNP_SALTY Polyribonucleotide nucleotidyltransferase | 23 | Phosphoryl STY(9)     | ALTEETGTTIEIEDDGTVK                      | 577 | 19 | 3  | 23.26 | b8y8y9                                       | 2101.96 | 75.219  | 6078  | 3 | 701.32  | 11.85  |
| Q8ZLT3 PNP_SALTY Polyribonucleotide nucleotidyltransferase | 24 | Oxidation+M(10)       | QATAAVMVSMDDTAVFVTVVGQ<br>K              | 25  | 23 | 4  | 13.48 | b7°b7b10y14                                  | 2384.16 | 98.191  | 4304  | 3 | 795.39  | -10.96 |
| Q8ZLT3 PNP_SALTY Polyribonucleotide nucleotidyltransferase | 25 | Oxidation+M(7)        | QATAAVMVSMDDTAVFVTVVGQ<br>KK             | 25  | 24 | 6  | 19.42 | b5°b5b8°b8°b8b15                             | 2512.27 | 101.936 | 2273  | 3 | 838.09  | -5.05  |
| P14845 CARA_SALTY Carbamoyl-phohate synthase small chain   | 1  | Carbamidomethyl+C(12) | FLETDIPLFGICLGHQLLASGAK                  | 257 | 25 | 16 | 87.38 | b2b3b4°b4b6b25y1y4y7y8<br>y14y19y20y21y23y25 | 2684.44 | 127.531 | 52225 | 3 | 895.49  | -1.18  |
| P14845 CARA_SALTY Carbamoyl-phohate synthase small chain   | 2  |                       | AFPGLNGMDLAKEVTTAETYR                    | 148 | 21 | 7  | 28.17 | b10°b10b11y4°y4y7y21                         | 2284.16 | 80.518  | 40603 | 3 | 762.06  | 12.08  |
| P14845 CARA_SALTY Carbamoyl-phohate synthase small chain   | 3  |                       | TDKPAFSFQGHPEASPGPHDAAPL<br>FDHFIELIEQYR | 342 | 36 | 9  | 65.99 | b4b5b9b10y1y3y4y5y36                         | 4064.92 | 105.974 | 25521 | 5 | 813.79  | -9.67  |
| P14845 CARA_SALTY Carbamoyl-phohate synthase small chain   | 4  |                       | DLPLIASNFR                               | 83  | 10 | 4  | 29.46 | b3y5y6y10                                    | 1145.62 | 75.827  | 15906 | 2 | 573.31  | -8.31  |
| P14845 CARA_SALTY Carbamoyl-phohate synthase small chain   | 5  |                       | SEDDLPPFHVVAYDFGAK                       | 185 | 17 | 7  | 10    | b1b2b11°b11y1y9y17                           | 1909.88 | 81.437  | 7989  | 3 | 637.30  | -6.90  |



|                                                          |    |                       |                                                     |     |    |    |       |                                 |         |         |        |   |         |        |
|----------------------------------------------------------|----|-----------------------|-----------------------------------------------------|-----|----|----|-------|---------------------------------|---------|---------|--------|---|---------|--------|
| P14845 CARA_SALTY Carbamoyl-phohate synthase small chain | 6  | Carbamidomethyl+C(18) | MNPDGIFLSNGPGDPAPCDYAITA IQK                        | 230 | 27 | 4  | 12.23 | b2b4y11y13                      | 2862.37 | 82.959  | 2585   | 2 | 1431.69 | 8.87   |
| P14845 CARA_SALTY Carbamoyl-phohate synthase small chain | 7  |                       | QIVTLTYPHIGNVGTNK                                   | 50  | 17 | 4  | 30.82 | b3b4y8y10                       | 1854.97 | 52.782  | 51938  | 3 | 618.99  | -19.94 |
| P14845 CARA_SALTY Carbamoyl-phohate synthase small chain | 8  |                       | SALLVLEDGTQFHGR                                     | 3   | 15 | 4  | 18.79 | b3y5y10*y10                     | 1642.83 | 66.802  | 9597   | 3 | 548.28  | -16.42 |
| P14845 CARA_SALTY Carbamoyl-phohate synthase small chain | 9  |                       | SLFDGTLQGIHR                                        | 330 | 12 | 5  | 38.3  | b11*b11y4y6y10                  | 1343.68 | 64.446  | 5740   | 3 | 448.57  | -17.53 |
| P14845 CARA_SALTY Carbamoyl-phohate synthase small chain | 10 |                       | EVTTAETYR                                           | 160 | 9  | 5  | 31.3  | b5*b5b7*b7y4                    | 1069.52 | 70.601  | 5265   | 2 | 535.27  | 6.85   |
| P14845 CARA_SALTY Carbamoyl-phohate synthase small chain | 11 |                       | NVVMITAQNHGFAVDEDSL PANL R                          | 302 | 24 | 3  | 22.41 | b12b13y5                        | 2611.24 | 101.208 | 3064   | 4 | 653.57  | -20.38 |
| P14845 CARA_SALTY Carbamoyl-phohate synthase small chain | 12 |                       | FGHHGGNHPVK                                         | 287 | 11 | 5  | 37.8  | b4y5*y5y6y8                     | 1186.57 | 80.490  | 2314   | 1 | 1186.57 | -16.25 |
| P14845 CARA_SALTY Carbamoyl-phohate synthase small chain | 13 |                       | DGLPEAK                                             | 178 | 7  | 3  | 41.34 | b6y3y5                          | 729.37  | 44.463  | 1880   | 1 | 729.37  | -16.90 |
| P14845 CARA_SALTY Carbamoyl-phohate synthase small chain | 14 |                       | MKFGHHGGNHPVK                                       | 285 | 13 | 3  | 21.35 | b5y5y11                         | 1445.73 | 57.721  | 490009 | 3 | 482.58  | 4.05   |
| P14845 CARA_SALTY Carbamoyl-phohate synthase small chain | 15 |                       | AFPGLNGMDLAKEVTTAETYR                               | 148 | 21 | 3  | 22.82 | b7y6y7                          | 2284.13 | 83.314  | 11701  | 2 | 1142.57 | 0.75   |
| P14845 CARA_SALTY Carbamoyl-phohate synthase small chain | 16 |                       | RHNIVAIADIDTR                                       | 103 | 13 | 3  | 21.35 | b3b9y7                          | 1493.82 | 98.610  | 4789   | 3 | 498.61  | 0.00   |
| P14845 CARA_SALTY Carbamoyl-phohate synthase small chain | 17 |                       | DGLPEAKSEDDLPHFVVAYDFGA K                           | 178 | 24 | 5  | 24.63 | b6b10b13y6y17                   | 2620.22 | 69.772  | 3200   | 4 | 655.81  | -12.21 |
| P14845 CARA_SALTY Carbamoyl-phohate synthase small chain | 18 |                       | AKAFPLNGMDLAK                                       | 146 | 14 | 4  | 28.56 | b10b12y4y7                      | 1432.78 | 59.618  | 3013   | 2 | 716.89  | 13.21  |
| P14845 CARA_SALTY Carbamoyl-phohate synthase small chain | 19 | Carbamidomethyl+C(6)  | GAQNGCIIAGDSPDAKLALEK                               | 125 | 21 | 5  | 32.3  | b7b8b12b15y13                   | 2128.06 | 97.536  | 1832   | 2 | 1064.53 | -6.65  |
| Q8ZQ40 WRBA_SALTY Flavoprotein wrbA                      | 1  |                       | GGTPYGATTIAGGDGSR                                   | 155 | 17 | 5  | 34.62 | y5y6y8y12y17                    | 1537.73 | 34.012  | 31924  | 3 | 513.25  | 5.95   |
| Q8ZQ40 WRBA_SALTY Flavoprotein wrbA                      | 2  |                       | LGSVFSSTGTGGGQEQTITSTWTT LAHHGMVIVPIGYAAQELFDVSQ VR | 106 | 49 | 13 | 78.23 | b9y1y2y3y4y5y6y7y8y10y12*y12y49 | 5134.59 | 116.100 | 29333  | 4 | 1284.40 | 5.71   |
| Q8ZQ40 WRBA_SALTY Flavoprotein wrbA                      | 3  |                       | TQNAPVATPQELADYDAIIFGTPT R                          | 54  | 25 | 7  | 34.73 | b3b11b14y4y6y7y25               | 2689.35 | 89.925  | 17473  | 3 | 897.12  | 1.82   |
| Q8ZQ40 WRBA_SALTY Flavoprotein wrbA                      | 4  |                       | FGNMSGQMR                                           | 79  | 9  | 4  | 46.86 | y3y5y7y9                        | 1027.44 | 37.767  | 11861  | 2 | 514.22  | -5.35  |
| Q8ZQ40 WRBA_SALTY Flavoprotein wrbA                      | 5  |                       | YQGEYVAGLAVK                                        | 183 | 12 | 4  | 35.29 | b4b7b8y10                       | 1297.67 | 55.319  | 4645   | 2 | 649.34  | -9.88  |
| Q8ZQ40 WRBA_SALTY Flavoprotein wrbA                      | 6  |                       | TFLDQTGGLWASGSLYGK                                  | 88  | 18 | 5  | 45.52 | b4b6b7b9b14                     | 1900.95 | 66.198  | 3377   | 2 | 950.98  | 3.72   |
| Q8ZQ40 WRBA_SALTY Flavoprotein wrbA                      | 7  |                       | ILVLYYSMYGHETMAHAVAEGA K                            | 3   | 24 | 4  | 24.14 | b11y8y9y17                      | 2667.35 | 89.143  | 2940   | 3 | 889.79  | 7.05   |
| Q8ZQ40 WRBA_SALTY Flavoprotein wrbA                      | 8  |                       | MAKILVLYYSMYGHETMAHAVA EGAK                         | 0   | 27 | 3  | 12.23 | b13y5y14                        | 2997.50 | 85.408  | 6023   | 3 | 999.84  | -2.20  |
| Q8ZQ40 WRBA_SALTY Flavoprotein wrbA                      | 9  |                       | LGSVFSSTGTGGGQEQTITSTWTT LA                         | 106 | 26 | 1  | 13.69 | y15                             | 2587.25 | 116.095 | 3544   | 3 | 863.09  | -1.32  |
| Q8ZQ40 WRBA_SALTY Flavoprotein wrbA                      | 10 |                       | TQNAPVATPQELADYDAI                                  | 54  | 18 | 1  | 8.06  | y9                              | 1916.92 | 89.964  | 3467   | 3 | 639.64  | -4.20  |
| Q7CPB2 YJBJ_SALTY UPF0337 protein yjbJ                   | 1  |                       | LTDDDMTVIEGKR                                       | 24  | 13 | 3  | 26.12 | b3b4y11                         | 1492.72 | 76.061  | 15319  | 2 | 746.86  | -9.40  |
| Q7CPB2 YJBJ_SALTY UPF0337 protein yjbJ                   | 2  |                       | DQAEKEVVDWETR                                       | 52  | 13 | 3  | 28.83 | y3y4y8                          | 1604.77 | 73.631  | 8337   | 2 | 802.89  | 10.12  |
| Q7CPB2 YJBJ_SALTY UPF0337 protein yjbJ                   | 3  |                       | YGYQKDQAEK                                          | 47  | 10 | 6  | 42.19 | b1b3b6y5y6y10                   | 1229.59 | 30.679  | 5621   | 2 | 615.30  | 8.64   |
| Q7CPB2 YJBJ_SALTY UPF0337 protein yjbJ                   | 4  |                       | MNKDEAGGNWK                                         | 1   | 11 | 3  | 32.05 | y5y7y8                          | 1249.55 | 25.885  | 2038   | 3 | 417.19  | -8.60  |
| Q7CPB2 YJBJ_SALTY UPF0337 protein yjbJ                   | 5  |                       | DQAEKEVVDWETR                                       | 52  | 13 | 3  | 26.12 | b8b9y8                          | 1604.77 | 51.278  | 6775   | 2 | 802.89  | 6.31   |

|                                                                 |    |                       |                                             |      |    |    |       |                                  |         |         |       |   |         |        |
|-----------------------------------------------------------------|----|-----------------------|---------------------------------------------|------|----|----|-------|----------------------------------|---------|---------|-------|---|---------|--------|
| [Q8ZRM2 GLO2_SALTY<br>Hydroxyacylglutathione hydrolase          | 1  |                       | TEDIDLINEINKETILQQPEAR                      | 218  | 22 | 6  | 21.64 | b4b9°b9b11*b11y10                | 2582.29 | 69.747  | 8783  | 3 | 861.44  | -14.37 |
| [Q8ZRM2 GLO2_SALTY<br>Hydroxyacylglutathione hydrolase          | 2  |                       | TEDIDLINEINK                                | 218  | 12 | 6  | 26.99 | b9°b9*b9b10*b10y8                | 1416.74 | 61.510  | 5289  | 2 | 708.87  | 12.06  |
| [Q8ZRM2 GLO2_SALTY<br>Hydroxyacylglutathione hydrolase          | 3  |                       | LFEGTPSQMYQSLMK                             | 136  | 15 | 3  | 21.28 | y11*y11y12                       | 1759.83 | 96.113  | 3623  | 2 | 880.42  | -5.34  |
| [Q8ZRM2 GLO2_SALTY<br>Hydroxyacylglutathione hydrolase          | 4  |                       | WMPEAIFLTHHHHDHVGGVK                        | 43   | 20 | 4  | 14.89 | b1b9y11y13                       | 2348.14 | 75.951  | 3529  | 3 | 783.38  | -4.57  |
| [Q8ZRM2 GLO2_SALTY<br>Hydroxyacylglutathione hydrolase          | 5  |                       | MNLNSIPAFQDNYIWVLTNDEGR                     | 0    | 23 | 3  | 13.48 | b6y3y5                           | 2710.25 | 92.779  | 1803  | 4 | 678.32  | -14.86 |
| [Q8ZRM2 GLO2_SALTY<br>Hydroxyacylglutathione hydrolase          | 6  |                       | NLNSIPAFQDNYIWVLTNDEGR                      | 1    | 22 | 6  | 37.77 | b3b4b21y4y7y10                   | 2579.30 | 116.100 | 5387  | 2 | 1290.15 | 17.32  |
| [Q8ZRM2 GLO2_SALTY<br>Hydroxyacylglutathione hydrolase          | 7  |                       | ELLQHFPQMTVYGPAETQDKGAT<br>HLVGDGDTIR       | 63   | 33 | 4  | 16.05 | b10y6y10y27                      | 3624.83 | 97.122  | 12503 | 3 | 1208.95 | 14.75  |
| [Q8ZRM2 GLO2_SALTY<br>Hydroxyacylglutathione hydrolase          | 8  |                       | AIAEHKWMPEAIFLTHHHHDHVG<br>GVK              | 37   | 26 | 3  | 12.49 | b7b18y10                         | 2997.49 | 88.783  | 11126 | 3 | 999.84  | -4.48  |
| [Q8ZRM2 GLO2_SALTY<br>Hydroxyacylglutathione hydrolase          | 9  | Oxidation+M(1)        | MNLNSIPAFQDNYIWVLTNDEGR                     | 0    | 23 | 8  | 30.52 | b9*b9y3y7*y7y9°y9y11             | 2726.27 | 98.140  | 3698  | 4 | 682.32  | -6.81  |
| [P0A2R4 RPOC_SALTY DNA-directed<br>RNA polymerase subunit beta' | 1  | Carbamidomethyl+C(9)  | NTLLHEQWCDLLEANSVDAVK                       | 860  | 21 | 6  | 21.01 | b1y1y4y7y13*y13                  | 2455.19 | 88.211  | 19496 | 3 | 819.07  | -0.89  |
| [P0A2R4 RPOC_SALTY DNA-directed<br>RNA polymerase subunit beta' | 2  |                       | IALASPD MIR                                 | 21   | 10 | 5  | 69.52 | y5y6y7y8y9                       | 1086.59 | 60.836  | 11057 | 2 | 543.80  | -8.54  |
| [P0A2R4 RPOC_SALTY DNA-directed<br>RNA polymerase subunit beta' | 3  |                       | YIVNEVQDVYR                                 | 1231 | 11 | 5  | 37.8  | b5°b5y4y5y8                      | 1397.71 | 59.662  | 7070  | 2 | 699.36  | 0.09   |
| [P0A2R4 RPOC_SALTY DNA-directed<br>RNA polymerase subunit beta' | 4  |                       | AAAESSIQVK                                  | 943  | 10 | 6  | 29.46 | b2b3b4y2y6y10                    | 1003.55 | 38.775  | 5811  | 2 | 502.28  | 10.52  |
| [P0A2R4 RPOC_SALTY DNA-directed<br>RNA polymerase subunit beta' | 5  |                       | MLQEAVDALLDNRR                              | 297  | 15 | 5  | 18.79 | b2b3b12y5*y5                     | 1700.85 | 76.026  | 5416  | 3 | 567.62  | -14.07 |
| [P0A2R4 RPOC_SALTY DNA-directed<br>RNA polymerase subunit beta' | 6  |                       | HEIIEAEAEVAEIQEQFSGLVTA<br>GER              | 650  | 28 | 6  | 25.84 | b3b6b10b14y12*y12                | 3070.52 | 106.528 | 3567  | 3 | 1024.18 | 7.71   |
| [P0A2R4 RPOC_SALTY DNA-directed<br>RNA polymerase subunit beta' | 7  | Carbamidomethyl+C(36) | ALMMSTNNILSPANGEPHIPSQD<br>VVLGLYYMTRDCVNAK | 481  | 40 | 3  | 38.6  | b4b5b6                           | 4395.17 | 107.713 | 3541  | 5 | 879.84  | -4.00  |
| [P0A2R4 RPOC_SALTY DNA-directed<br>RNA polymerase subunit beta' | 8  |                       | LVITPVDGSDPYEEMIPK                          | 1174 | 18 | 3  | 16.15 | b3b14y13                         | 2003.00 | 73.082  | 3203  | 3 | 668.34  | -1.10  |
| [P0A2R4 RPOC_SALTY DNA-directed<br>RNA polymerase subunit beta' | 9  |                       | ASLATESFISAASFQETTR                         | 1311 | 19 | 7  | 32.79 | b4°b4b13b14y8°y8y13              | 2017.00 | 81.952  | 2855  | 4 | 505.01  | 8.29   |
| [P0A2R4 RPOC_SALTY DNA-directed<br>RNA polymerase subunit beta' | 10 |                       | LIPAGTGYAYHQDR                              | 1355 | 14 | 3  | 28.54 | y3y8y10                          | 1561.78 | 42.201  | 2014  | 2 | 781.39  | 3.20   |
| [P0A2R4 RPOC_SALTY DNA-directed<br>RNA polymerase subunit beta' | 11 |                       | SGASVGIDDMVIEK                              | 634  | 15 | 3  | 24.81 | b4b5y9                           | 1517.78 | 46.537  | 52027 | 2 | 759.39  | 19.14  |
| [P0A2R4 RPOC_SALTY DNA-directed<br>RNA polymerase subunit beta' | 12 |                       | GLMAKPDGSIHETPITANFR                        | 744  | 20 | 10 | 40.33 | b4b7°b7b8y4*y4y10°y10*y<br>10y17 | 2131.12 | 95.676  | 38288 | 3 | 711.04  | -0.69  |
| [P0A2R4 RPOC_SALTY DNA-directed<br>RNA polymerase subunit beta' | 13 |                       | AAGEQPATPQVTAEDASASLAELL<br>NAGLGGSDNE      | 1373 | 34 | 6  | 22.78 | b6b12b15y9y11y21                 | 3254.59 | 82.813  | 17060 | 3 | 1085.53 | 17.25  |

|                                                             |    |                      |                                    |      |    |   |       |                  |         |         |       |   |         |        |
|-------------------------------------------------------------|----|----------------------|------------------------------------|------|----|---|-------|------------------|---------|---------|-------|---|---------|--------|
| P0A2R4 RPOC_SALTY DNA-directed RNA polymerase subunit beta' | 14 |                      | LVITSR                             | 972  | 6  | 1 | 13.9  | y5               | 688.43  | 53.553  | 13712 | 2 | 344.72  | -9.31  |
| P0A2R4 RPOC_SALTY DNA-directed RNA polymerase subunit beta' | 15 |                      | EGLNVLQYFISTHGAR                   | 764  | 16 | 5 | 40.78 | y3y4y5°y5y9      | 1804.90 | 90.142  | 13175 | 3 | 602.31  | -16.23 |
| P0A2R4 RPOC_SALTY DNA-directed RNA polymerase subunit beta' | 16 |                      | VTAEDVLKPGTADILVPR                 | 842  | 18 | 5 | 41.86 | b6y3y4y5y9       | 1894.03 | 71.964  | 12045 | 3 | 632.02  | -15.60 |
| P0A2R4 RPOC_SALTY DNA-directed RNA polymerase subunit beta' | 17 |                      | FATSDLNDLYR                        | 259  | 11 | 3 | 28.07 | b9b10y9          | 1314.61 | 69.257  | 11416 | 3 | 438.88  | -16.44 |
| P0A2R4 RPOC_SALTY DNA-directed RNA polymerase subunit beta' | 18 |                      | GDVISDGPEAPHDILR                   | 1206 | 16 | 4 | 17.79 | b6°b6y6y13       | 1690.81 | 34.981  | 7128  | 2 | 845.91  | -16.24 |
| P0A2R4 RPOC_SALTY DNA-directed RNA polymerase subunit beta' | 19 |                      | DLAR                               | 901  | 4  | 1 | 13.15 | b3               | 474.26  | 29.836  | 6302  | 1 | 474.26  | -4.95  |
| P0A2R4 RPOC_SALTY DNA-directed RNA polymerase subunit beta' | 20 |                      | MGHIELASPTAHIWFLK                  | 101  | 17 | 4 | 28.3  | b5b6b10y8        | 1951.06 | 59.205  | 5635  | 2 | 976.03  | 17.02  |
| P0A2R4 RPOC_SALTY DNA-directed RNA polymerase subunit beta' | 21 |                      | TFHIGGAASR                         | 933  | 10 | 7 | 69.52 | b3b4°b4b5°b5b6b9 | 1016.53 | 35.004  | 5287  | 2 | 508.77  | 3.30   |
| P0A2R4 RPOC_SALTY DNA-directed RNA polymerase subunit beta' | 22 |                      | QTDELTLGLSSLVVLSAER                | 1048 | 19 | 6 | 26.72 | b6°b6b7b14°b14y6 | 2033.06 | 86.636  | 4953  | 2 | 1017.03 | 7.87   |
| P0A2R4 RPOC_SALTY DNA-directed RNA polymerase subunit beta' | 23 | Carbamidomethyl+C(4) | GVICEK                             | 81   | 6  | 1 | 13.9  | b3               | 705.35  | 40.579  | 4281  | 1 | 705.35  | -7.87  |
| P0A2R4 RPOC_SALTY DNA-directed RNA polymerase subunit beta' | 24 |                      | VIDIWAAANDR                        | 681  | 11 | 4 | 25.06 | b3y5°y5y7        | 1243.62 | 47.458  | 4207  | 2 | 622.31  | -19.14 |
| P0A2R4 RPOC_SALTY DNA-directed RNA polymerase subunit beta' | 25 |                      | ALMMSTNNILSPANGEPHIVPSQDVVLGLYYMTR | 481  | 34 | 5 | 18.14 | b4b13y3y7y12     | 3707.87 | 115.210 | 3557  | 3 | 1236.63 | -3.62  |
| P0A2R4 RPOC_SALTY DNA-directed RNA polymerase subunit beta' | 26 |                      | AMMDNLQTETVINR                     | 695  | 14 | 3 | 19.96 | b3b13y5          | 1635.77 | 46.872  | 3415  | 3 | 545.93  | -7.76  |
| P0A2R4 RPOC_SALTY DNA-directed RNA polymerase subunit beta' | 27 |                      | EEAVVWDILDEVIR                     | 403  | 14 | 4 | 25.4  | b4°b4b5y3        | 1685.86 | 39.210  | 2892  | 3 | 562.62  | -11.51 |
| P0A2R4 RPOC_SALTY DNA-directed RNA polymerase subunit beta' | 28 |                      | ATIESAGSSDFLEGEQVEYSR              | 1263 | 21 | 5 | 28.17 | b9b14y3y4°y4     | 2275.04 | 72.341  | 2853  | 4 | 569.52  | 2.04   |
| P0A2R4 RPOC_SALTY DNA-directed RNA polymerase subunit beta' | 29 |                      | QLNVFEGER                          | 1194 | 9  | 3 | 31.3  | b3b6y4           | 1091.53 | 27.425  | 2719  | 2 | 546.27  | -17.56 |
| P0A2R4 RPOC_SALTY DNA-directed RNA polymerase subunit beta' | 30 |                      | AIVQLEDGVQISSGDTLAR                | 1104 | 19 | 3 | 15.48 | b3b7y8           | 1972.03 | 73.276  | 2542  | 3 | 658.01  | -4.58  |
| P0A2R4 RPOC_SALTY DNA-directed RNA polymerase subunit beta' | 31 |                      | VLTEAAVAGK                         | 1330 | 10 | 6 | 62.53 | b4y3y4y8°y8y9    | 958.54  | 35.516  | 2444  | 2 | 479.77  | -15.60 |
| P0A2R4 RPOC_SALTY DNA-directed RNA polymerase subunit beta' | 32 | Carbamidomethyl+C(1) | CGVEVTQTK                          | 87   | 9  | 3 | 31.3  | b3b4y6           | 1021.50 | 25.461  | 2020  | 2 | 511.25  | -0.18  |

|                                                                |    |                       |                                              |      |    |   |       |                        |         |         |        |   |         |        |
|----------------------------------------------------------------|----|-----------------------|----------------------------------------------|------|----|---|-------|------------------------|---------|---------|--------|---|---------|--------|
| P0A2R4 RPOC_SALTY DNA-directed RNA polymerase subunit beta'    | 33 |                       | YNKVIDIWAANDR                                | 678  | 14 | 3 | 25.4  | b12y7y8                | 1648.82 | 59.648  | 238924 | 2 | 824.91  | -14.66 |
| P0A2R4 RPOC_SALTY DNA-directed RNA polymerase subunit beta'    | 34 |                       | AQTKTEEFDAIK                                 | 9    | 12 | 3 | 23.01 | b8b11y10               | 1380.71 | 76.548  | 7805   | 2 | 690.86  | 4.60   |
| P0A2R4 RPOC_SALTY DNA-directed RNA polymerase subunit beta'    | 35 |                       | DLARGHIINK                                   | 901  | 10 | 3 | 37.7  | y6y7y8                 | 1136.64 | 60.015  | 4739   | 2 | 568.82  | -13.64 |
| P0A2R4 RPOC_SALTY DNA-directed RNA polymerase subunit beta'    | 36 |                       | KGLADTALK                                    | 780  | 9  | 3 | 31.3  | b5b6y6                 | 916.54  | 33.112  | 4102   | 2 | 458.78  | -1.73  |
| P0A2R4 RPOC_SALTY DNA-directed RNA polymerase subunit beta'    | 37 |                       | VPYGAVMAKGDGEQVAGGETVA<br>NWDPHTMPVITEVSGFIR | 996  | 40 | 5 | 21.75 | b4b6b13b15*b15         | 4186.06 | 114.093 | 3767   | 4 | 1047.27 | 5.48   |
| P0A2R4 RPOC_SALTY DNA-directed RNA polymerase subunit beta'    | 38 |                       | QTDELTLGLSSLVLDsaERTTGG<br>K                 | 1048 | 24 | 5 | 13.11 | b9°b9y9°y9y11          | 2477.29 | 110.880 | 2701   | 3 | 826.44  | 8.48   |
| P0A2R4 RPOC_SALTY DNA-directed RNA polymerase subunit beta'    | 39 |                       | GEaIGVIAaQSIGEPGTQlTMRTF<br>HIGGAASR         | 911  | 32 | 4 | 14.06 | b3b21y12y15            | 3196.67 | 113.225 | 2318   | 4 | 799.92  | 5.04   |
| P0A2R4 RPOC_SALTY DNA-directed RNA polymerase subunit beta'    | 40 |                       | AAAESSIQVKNK                                 | 943  | 12 | 6 | 61.83 | b4b6b8*b8b11y5         | 1245.68 | 34.965  | 1880   | 2 | 623.34  | -3.33  |
| P0A2R4 RPOC_SALTY DNA-directed RNA polymerase subunit beta'    | 41 | Phosphoryl STY(12)    | AIVQLEDGVQISSGDTLAR                          | 1104 | 19 | 3 | 15.48 | b12y7y11               | 2052.02 | 83.317  | 4003   | 3 | 684.68  | 14.16  |
| P0A2R4 RPOC_SALTY DNA-directed RNA polymerase subunit beta'    | 42 | Phosphoryl STY(11)    | MALELFKPFiyGK                                | 371  | 13 | 5 | 30.68 | b9b11y4y10°y10         | 1636.81 | 81.033  | 3425   | 2 | 818.91  | -2.61  |
| P0A2R4 RPOC_SALTY DNA-directed RNA polymerase subunit beta'    | 43 | Phosphoryl STY(7)     | GEGMVLtGPKEaER                               | 521  | 14 | 4 | 31.73 | b5y3y7y8               | 1553.71 | 39.257  | 2010   | 3 | 518.58  | 11.08  |
| P0A2R4 RPOC_SALTY DNA-directed RNA polymerase subunit beta'    | 44 | Oxidation+M(10)       | SGASVGIDDMVIEK                               | 634  | 15 | 7 | 44.38 | b3°b3b4b6°b6y7y8       | 1533.73 | 76.518  | 4980   | 3 | 511.92  | -8.04  |
| P0A2R4 RPOC_SALTY DNA-directed RNA polymerase subunit beta'    | 45 | Oxidation+M(10)       | SGASVGIDDMVIEKK                              | 634  | 16 | 3 | 26.16 | b3b4b14                | 1661.85 | 101.212 | 2926   | 3 | 554.62  | 7.20   |
| P0A2R4 RPOC_SALTY DNA-directed RNA polymerase subunit beta'    | 46 |                       | PAGtGYaYHQDR                                 | 1357 | 12 | 1 | 7.38  | b10                    | 1335.62 | 42.202  | 5003   | 2 | 668.32  | 12.25  |
| P0A2R4 RPOC_SALTY DNA-directed RNA polymerase subunit beta'    | 47 |                       | DPYEEMIPK                                    | 1183 | 9  | 0 | 4.9   |                        | 1121.53 | 73.043  | 1671   | 2 | 561.27  | 10.01  |
| Q8ZQU3 DHSA_SALTY Succinate dehydrogenase flavoprotein subunit | 1  | Carbamidomethyl+C(18) | TFaHVDpKVEIPiVPTCHyMMG<br>GIPTK              | 335  | 28 | 9 | 31.65 | b5b6°b6y2y3°y3y5y13y28 | 3135.55 | 73.207  | 39351  | 4 | 784.64  | -10.20 |
| Q8ZQU3 DHSA_SALTY Succinate dehydrogenase flavoprotein subunit | 2  |                       | LGgNSLLDLVVFGR                               | 399  | 14 | 4 | 19.96 | b3y4y8y14              | 1459.83 | 103.383 | 26635  | 2 | 730.42  | 1.34   |
| Q8ZQU3 DHSA_SALTY Succinate dehydrogenase flavoprotein subunit | 3  | Carbamidomethyl+C(5)  | ALQECMQHNFSVFR                               | 461  | 14 | 4 | 28.54 | y5y7y10y14             | 1766.79 | 63.254  | 25447  | 3 | 589.60  | -8.84  |
| Q8ZQU3 DHSA_SALTY Succinate dehydrogenase flavoprotein subunit | 4  | Carbamidomethyl+C(12) | AALQISQSGQTcALLSK                            | 21   | 17 | 6 | 43.07 | b2y8y9y11y12y17        | 1775.94 | 71.531  | 15287  | 2 | 888.47  | 1.99   |
| Q8ZQU3 DHSA_SALTY Succinate dehydrogenase flavoprotein subunit | 5  |                       | NHTTIFSEWYALDLVK                             | 155  | 16 | 5 | 36.01 | b2b5b7b8b10            | 1936.99 | 94.050  | 10712  | 2 | 969.00  | 4.60   |
| Q8ZQU3 DHSA_SALTY Succinate dehydrogenase flavoprotein subunit | 6  |                       | DaSESDVEGSLER                                | 430  | 13 | 3 | 26.12 | b4y5y6                 | 1393.62 | 41.442  | 8085   | 2 | 697.31  | 10.16  |
| Q8ZQU3 DHSA_SALTY Succinate dehydrogenase flavoprotein subunit | 7  | Carbamidomethyl+C(29) | AGVPVQdMEMWQFHTGIAGAG<br>VLVTEGCR            | 228  | 30 | 3 | 11.62 | b7b28y15               | 3213.57 | 92.897  | 3953   | 5 | 643.52  | 13.90  |

|                                                                |    |                                          |                                      |     |    |    |       |                             |         |         |       |   |         |        |
|----------------------------------------------------------------|----|------------------------------------------|--------------------------------------|-----|----|----|-------|-----------------------------|---------|---------|-------|---|---------|--------|
| Q8ZQU3 DHSA_SALTY Succinate dehydrogenase flavoprotein subunit | 8  |                                          | AAGLHLQESIAEQGVLRDASESDV EGSRLER     | 413 | 30 | 8  | 24.45 | b3y2y4°y4y9y12°y12y20       | 3166.59 | 93.109  | 3809  | 4 | 792.40  | 9.71   |
| Q8ZQU3 DHSA_SALTY Succinate dehydrogenase flavoprotein subunit | 9  |                                          | IYQSTTNAHINTGDGVGMALR                | 207 | 21 | 3  | 14.36 | b8y5y9                      | 2219.07 | 59.226  | 3510  | 2 | 1110.04 | -6.82  |
| Q8ZQU3 DHSA_SALTY Succinate dehydrogenase flavoprotein subunit | 10 |                                          | TGPEAILELEHMGLPFSR                   | 90  | 18 | 7  | 63.98 | b6y4y6y7y8y10y16            | 1996.99 | 93.550  | 52865 | 3 | 666.33  | -15.16 |
| Q8ZQU3 DHSA_SALTY Succinate dehydrogenase flavoprotein subunit | 11 |                                          | GLEQLK                               | 482 | 6  | 2  | 27.43 | b3y3                        | 687.40  | 43.671  | 9666  | 1 | 687.40  | -6.48  |
| Q8ZQU3 DHSA_SALTY Succinate dehydrogenase flavoprotein subunit | 12 |                                          | LPVR                                 | 2   | 4  | 1  | 13.15 | b3                          | 484.32  | 76.529  | 9463  | 1 | 484.32  | -7.18  |
| Q8ZQU3 DHSA_SALTY Succinate dehydrogenase flavoprotein subunit | 13 |                                          | NGEDPVAIR                            | 451 | 9  | 3  | 31.3  | b6b7y8                      | 970.51  | 30.696  | 6093  | 2 | 485.76  | 20.25  |
| Q8ZQU3 DHSA_SALTY Succinate dehydrogenase flavoprotein subunit | 14 |                                          | TAAAADR                              | 133 | 7  | 9  | 81.92 | b4°b4b5b6°b6y3°y3y4y5       | 675.34  | 111.418 | 3835  | 1 | 675.34  | -9.40  |
| Q8ZQU3 DHSA_SALTY Succinate dehydrogenase flavoprotein subunit | 15 |                                          | EFDVAVVIGAGGAGMR                     | 6   | 15 | 4  | 18.79 | b9b12°b12y7                 | 1449.73 | 61.657  | 3254  | 2 | 725.37  | 8.76   |
| Q8ZQU3 DHSA_SALTY Succinate dehydrogenase flavoprotein subunit | 16 | Carbamidomethyl+C(3)                     | VECLELDNLMETAYATAVSANFR              | 510 | 23 | 4  | 22.51 | b7y3y4*y4                   | 2617.23 | 109.497 | 2712  | 3 | 873.08  | -0.56  |
| Q8ZQU3 DHSA_SALTY Succinate dehydrogenase flavoprotein subunit | 17 |                                          | HGER                                 | 267 | 4  | 1  | 13.15 | b3                          | 498.24  | 31.201  | 1520  | 1 | 498.24  | -5.45  |
| Q8ZQU3 DHSA_SALTY Succinate dehydrogenase flavoprotein subunit | 18 | Carbamidomethyl+C(18)                    | TFAHVDPVKEPIPVITCHYMMG GIPTK         | 335 | 28 | 3  | 12    | b8b21y3                     | 3135.59 | 98.616  | 31786 | 3 | 1045.87 | 0.78   |
| Q8ZQU3 DHSA_SALTY Succinate dehydrogenase flavoprotein subunit | 19 | Carbamidomethyl+C(15)                    | LDDTSSEFNTQRVECLELDNLME TAYATAVSANFR | 498 | 35 | 9  | 56.54 | b9b12b20y4*y4y5*y5y6y7      | 4010.87 | 109.994 | 6303  | 3 | 1337.63 | 8.03   |
| Q8ZQU3 DHSA_SALTY Succinate dehydrogenase flavoprotein subunit | 20 | Carbamidomethyl+C(29)<br>;Oxidation+M(8) | AGVPVQDMEMWQFHPTGIAGAG VLVTEGCR      | 228 | 30 | 4  | 11.62 | b3b8°b8y11                  | 3229.51 | 121.068 | 16991 | 4 | 808.13  | -3.70  |
| Q8ZQU3 DHSA_SALTY Succinate dehydrogenase flavoprotein subunit | 21 |                                          | AEQGVLRDASESDVEGSRLER                | 423 | 20 | 2  | 12.08 | b9b15                       | 2147.01 | 93.062  | 9044  | 3 | 716.34  | -6.37  |
| Q8ZQU3 DHSA_SALTY Succinate dehydrogenase flavoprotein subunit | 22 |                                          | AGVPVQDMEMWQFHPTGIAGAG VL            | 228 | 24 | 0  | 9.43  |                             | 2511.21 | 92.924  | 4374  | 3 | 837.74  | -2.53  |
| P0A249 PT1_SALTY Phohoenolpyruvate-protein phohotransferase    | 1  |                                          | VLAEQALAQPTTDELMTLVNK                | 546 | 21 | 7  | 25.5  | b6y9°y9y12*y12y13y21        | 2285.19 | 86.288  | 32986 | 3 | 762.40  | -7.69  |
| P0A249 PT1_SALTY Phohoenolpyruvate-protein phohotransferase    | 2  |                                          | TMDIGGDKELPYMNFPEENPFL GWR           | 332 | 26 | 7  | 22.27 | b2b3b4y1y2y11y26            | 3084.47 | 89.620  | 31464 | 4 | 771.87  | 3.01   |
| P0A249 PT1_SALTY Phohoenolpyruvate-protein phohotransferase    | 3  |                                          | HMTADAAAHEVIEGQATALEELD DEYLK        | 96  | 28 | 8  | 35.66 | y2y7y10°y10y12y15y17y28     | 3070.42 | 100.687 | 21674 | 3 | 1024.14 | -4.69  |
| P0A249 PT1_SALTY Phohoenolpyruvate-protein phohotransferase    | 4  |                                          | MISGILASPGIAFGK                      | 0   | 15 | 7  | 30.4  | b2b4y1y3y4y8y15             | 1461.79 | 81.066  | 17964 | 2 | 731.40  | -13.61 |
| P0A249 PT1_SALTY Phohoenolpyruvate-protein phohotransferase    | 5  |                                          | TEFLFMDRDALPTEEEQFAAYK               | 296 | 22 | 11 | 41.13 | b1°b1b2°b2b5°b5b10b11y6y7y9 | 2651.24 | 84.209  | 14282 | 3 | 884.42  | 2.49   |
| P0A249 PT1_SALTY Phohoenolpyruvate-protein phohotransferase    | 6  |                                          | NGDYLLDAVNNQVYNPTNDVI EQLR           | 213 | 27 | 10 | 51.18 | b14y2y3y4°y4y5y10y11°y11y27 | 3089.57 | 94.540  | 6156  | 3 | 1030.53 | 6.64   |
| P0A249 PT1_SALTY Phohoenolpyruvate-protein phohotransferase    | 7  |                                          | VLGFITDAGGR                          | 175 | 11 | 5  | 32.05 | y5y6°y6y9°y9                | 1105.62 | 50.432  | 3866  | 2 | 553.32  | 21.42  |
| P0A249 PT1_SALTY Phohoenolpyruvate-protein phohotransferase    | 8  |                                          | VDQEVER                              | 35  | 7  | 8  | 68.39 | b5b6°b6y4y5y6°y6*y6         | 874.43  | 29.912  | 3560  | 2 | 437.72  | 7.75   |
| P0A249 PT1_SALTY Phohoenolpyruvate-protein phohotransferase    | 9  |                                          | QVIDASHAEGK                          | 486 | 11 | 4  | 36.82 | b6°b6b8b10                  | 1154.60 | 42.896  | 2992  | 3 | 385.54  | 21.46  |

|                                                             |    |                       |                                   |     |    |    |       |                                  |         |         |        |   |         |        |
|-------------------------------------------------------------|----|-----------------------|-----------------------------------|-----|----|----|-------|----------------------------------|---------|---------|--------|---|---------|--------|
| P0A249 PT1_SALTY Phohoenolpyruvate-protein phohotransferase | 10 |                       | GNDMISHLYQPMSPSVLNLIK             | 465 | 21 | 3  | 14.36 | b6b9y12                          | 2357.16 | 98.673  | 2239   | 3 | 786.39  | -18.13 |
| P0A249 PT1_SALTY Phohoenolpyruvate-protein phohotransferase | 11 |                       | ELPYMNFPK                         | 340 | 9  | 4  | 46.08 | b3b6y5y7                         | 1138.54 | 81.535  | 2144   | 1 | 1138.54 | -21.12 |
| P0A249 PT1_SALTY Phohoenolpyruvate-protein phohotransferase | 12 |                       | AFDESIEIGVMVETPAAATIAR            | 418 | 22 | 6  | 52.12 | b4b5b6b9°b9b10                   | 2291.17 | 117.032 | 1652   | 2 | 1146.09 | 6.71   |
| P0A249 PT1_SALTY Phohoenolpyruvate-protein phohotransferase | 13 |                       | NTNFEDAKVLAEQALAQPTTDEL<br>MTLVNK | 538 | 29 | 4  | 11.8  | b10y15y18*y18                    | 3204.65 | 85.826  | 38483  | 5 | 641.74  | 12.11  |
| P0A249 PT1_SALTY Phohoenolpyruvate-protein phohotransferase | 14 |                       | EIEIYKQELR                        | 404 | 10 | 3  | 29.46 | b3b4y8                           | 1320.70 | 34.025  | 4945   | 3 | 440.91  | -10.35 |
| P0A249 PT1_SALTY Phohoenolpyruvate-protein phohotransferase | 15 | Oxidation+M(5)        | ELPYMNFPKEENPFLGWR                | 340 | 18 | 3  | 16.15 | b14y11y13                        | 2283.12 | 81.597  | 59465  | 3 | 761.71  | 13.47  |
| P0A249 PT1_SALTY Phohoenolpyruvate-protein phohotransferase | 16 | Oxidation+M(5)        | IMFPMIISVEEVR                     | 387 | 13 | 3  | 28.83 | b4b6b7                           | 1579.80 | 42.496  | 7238   | 3 | 527.27  | -11.59 |
| P0A249 PT1_SALTY Phohoenolpyruvate-protein phohotransferase | 17 | Oxidation+M(9)        | EAI FEGHIMLLEDEELEQEIIALIKD<br>K  | 69  | 27 | 5  | 36.61 | b5b10b12b14b21                   | 3184.63 | 105.514 | 2852   | 3 | 1062.21 | -2.61  |
| P0A249 PT1_SALTY Phohoenolpyruvate-protein phohotransferase | 18 | Oxidation+M(13)       | TMDIGGDKELPYMNFPKEENPFL<br>GWR    | 332 | 26 | 3  | 23.16 | b6b9b10                          | 3100.42 | 109.592 | 2577   | 2 | 1550.71 | -11.26 |
| P0A1B7 ATPE_SALTY ATP synthase epsilon chain                | 1  |                       | IQVTGSEGELGIYPGHAPLLTAIKP<br>GMIR | 23  | 29 | 11 | 54.79 | b2*b2b3b4y2y5y12y13y26<br>y27y29 | 3018.60 | 81.726  | 119670 | 4 | 755.41  | -14.48 |
| P0A1B7 ATPE_SALTY ATP synthase epsilon chain                | 2  |                       | AMTYHLDVVSAEQQMFSGLVEK            | 1   | 22 | 9  | 37.77 | b2b3b8b9y2y3y8y10y22             | 2483.19 | 90.128  | 35437  | 3 | 828.40  | -1.77  |
| P0A1B7 ATPE_SALTY ATP synthase epsilon chain                | 3  |                       | SSHGDVDYAQASAE LAK                | 107 | 17 | 4  | 37.84 | b7y6y7y8                         | 1748.79 | 44.985  | 33330  | 3 | 583.60  | -9.28  |
| P0A1B7 ATPE_SALTY ATP synthase epsilon chain                | 4  |                       | MAMTYHLDVVSAEQQMFSGLVE<br>K       | 0   | 23 | 4  | 13.48 | b3b9y1y5                         | 2614.25 | 110.877 | 2375   | 3 | 872.09  | 7.56   |
| P0A1B7 ATPE_SALTY ATP synthase epsilon chain                | 5  |                       | AEEHIK                            | 101 | 6  | 1  | 13.9  | b5                               | 726.37  | 68.683  | 1996   | 1 | 726.37  | -5.88  |
| P0A1B7 ATPE_SALTY ATP synthase epsilon chain                | 6  |                       | AEEHIKSSHGDVDYAQASAE LAK          | 101 | 23 | 3  | 13.48 | b6y7y11                          | 2456.18 | 65.237  | 20860  | 4 | 614.80  | 4.17   |
| P0A1B7 ATPE_SALTY ATP synthase epsilon chain                | 7  | Oxidation+M(16)       | MAMTYHLDVVSAEQQMFSGLVE<br>K       | 0   | 23 | 3  | 13.48 | b5b13y13                         | 2630.22 | 117.015 | 6766   | 3 | 877.41  | -3.99  |
| P0A1B7 ATPE_SALTY ATP synthase epsilon chain                | 8  | Oxidation+M(2)        | AMTYHLDVVSAEQQMFSGLVEK            | 1   | 22 | 3  | 13.9  | b11b16y12                        | 2499.19 | 99.466  | 6446   | 3 | 833.74  | 2.05   |
| P0A269 PPX_SALTY Exopolyphohatase                           | 1  |                       | LSDGALR                           | 291 | 7  | 7  | 51.85 | b3°b3b4b6y5°y5y7                 | 731.40  | 32.498  | 18373  | 1 | 731.40  | -9.68  |
| P0A269 PPX_SALTY Exopolyphohatase                           | 2  |                       | SPRPQEFAAVDLGSNSFHMVIAR           | 6   | 23 | 3  | 22.51 | b10b11y6                         | 2529.29 | 84.284  | 13325  | 3 | 843.77  | 10.42  |
| P0A269 PPX_SALTY Exopolyphohatase                           | 3  | Carbamidomethyl+C(4)  | GLSCLSLFAER                       | 64  | 11 | 4  | 42.57 | b3b4b5y10                        | 1252.62 | 59.932  | 2546   | 3 | 418.21  | -9.36  |
| P0A269 PPX_SALTY Exopolyphohatase                           | 4  | Carbamidomethyl+C(10) | LQGFSPSSVCIVGTHTLR                | 75  | 18 | 3  | 35.07 | b10b11b12                        | 1959.00 | 66.892  | 1940   | 2 | 980.00  | -8.23  |
| P0A269 PPX_SALTY Exopolyphohatase                           | 5  |                       | LSDGALREGVLYEMEGR                 | 291 | 17 | 5  | 16.91 | b5°b5b8y2y7                      | 1894.92 | 91.356  | 1775   | 3 | 632.31  | -6.06  |
| P0A269 PPX_SALTY Exopolyphohatase                           | 6  |                       | LSEEAMER                          | 56  | 8  | 4  | 41.71 | y4y5y6°y6                        | 964.46  | 30.393  | 39252  | 2 | 482.73  | 20.00  |
| P0A269 PPX_SALTY Exopolyphohatase                           | 7  |                       | LDDMPR                            | 417 | 6  | 1  | 13.9  | b3                               | 746.34  | 45.097  | 13080  | 1 | 746.34  | -7.03  |
| P0A269 PPX_SALTY Exopolyphohatase                           | 8  |                       | VIPYPIIISGNEEAR                   | 107 | 16 | 3  | 24.32 | b6b7y6                           | 1799.98 | 78.947  | 11922  | 2 | 900.49  | 12.48  |

|                                                         |    |                       |                                         |     |    |    |       |                                             |         |         |       |   |         |        |
|---------------------------------------------------------|----|-----------------------|-----------------------------------------|-----|----|----|-------|---------------------------------------------|---------|---------|-------|---|---------|--------|
| P0A269 PPX_SALTY Exopolyphohatase                       | 9  |                       | VVDGAMQIIGR                             | 29  | 11 | 3  | 25.06 | b10y3y10                                    | 1158.65 | 83.439  | 5190  | 2 | 579.83  | 15.49  |
| P0A269 PPX_SALTY Exopolyphohatase                       | 10 |                       | LNIEEESPEIAA                            | 500 | 13 | 3  | 26.12 | b6y3y4                                      | 1401.68 | 60.416  | 2357  | 2 | 701.34  | 4.62   |
| P0A269 PPX_SALTY Exopolyphohatase                       | 11 |                       | VLETTMQMYEQWQAQQPK                      | 335 | 18 | 4  | 16.15 | b4b9y9*y9                                   | 2239.07 | 74.822  | 1857  | 4 | 560.52  | 7.41   |
| P0A269 PPX_SALTY Exopolyphohatase                       | 12 | Carbamidomethyl+C(11) | LTTDDSHWTLCFPHDWFSQNALV<br>LLDLEK       | 459 | 29 | 4  | 22.22 | b5y3°y3y4                                   | 3501.71 | 100.228 | 1806  | 4 | 876.18  | 7.88   |
| P0A269 PPX_SALTY Exopolyphohatase                       | 13 |                       | HRSFNALSLPGLSEER                        | 251 | 16 | 6  | 25.19 | b7°b7b14y7y12*y12                           | 1812.94 | 84.349  | 12516 | 2 | 906.97  | 3.77   |
| P0A269 PPX_SALTY Exopolyphohatase                       | 14 |                       | LIFMGVEHTQPEKGR                         | 123 | 15 | 5  | 49.43 | y9y10y11y12*y12                             | 1741.89 | 81.507  | 3454  | 2 | 871.45  | -9.60  |
| P0A269 PPX_SALTY Exopolyphohatase                       | 15 |                       | LSDGALREGVLYEMEGR                       | 291 | 17 | 6  | 23.83 | b8°b8b14y12y14°y14                          | 1894.94 | 136.616 | 2124  | 2 | 947.97  | 4.70   |
| P0A269 PPX_SALTY Exopolyphohatase                       | 16 |                       | SLANQYNIDREQAR                          | 320 | 14 | 3  | 19.96 | b13y3y10                                    | 1677.85 | 87.825  | 1959  | 2 | 839.43  | 9.31   |
| P0A269 PPX_SALTY Exopolyphohatase                       | 17 |                       | QAQNAADFLKR                             | 93  | 11 | 4  | 32.05 | b3*b3b4b9                                   | 1261.66 | 52.260  | 1628  | 2 | 631.33  | -7.06  |
| P0A269 PPX_SALTY Exopolyphohatase                       | 18 | Phosphoryl STY(9)     | LVIDIGGGSTELVIGENFEPR                   | 139 | 21 | 4  | 22.49 | b16_H3PO4<br>b16y10y12y14                   | 2295.14 | 93.733  | 1972  | 3 | 765.72  | 10.85  |
| P0A269 PPX_SALTY Exopolyphohatase                       | 19 | Oxidation+M(6)        | VVDGAMQIIGR                             | 29  | 11 | 3  | 25.06 | b5b8y8                                      | 1174.63 | 38.874  | 5856  | 2 | 587.82  | 8.31   |
| P20753 PPIA_SALTY Peptidyl-prolyl cis-trans isomerase A | 1  |                       | NFVDYVNSGFYNNTTFHR                      | 54  | 18 | 8  | 41.72 | b2b3b6b10y10y12y16y18                       | 2194.98 | 74.237  | 59516 | 3 | 732.33  | -8.01  |
| P20753 PPIA_SALTY Peptidyl-prolyl cis-trans isomerase A | 2  |                       | TADKDSATSQFFINVADNAFLDH<br>GQR          | 116 | 26 | 15 | 78.31 | b2b3b8b10b11b13y4*y4y7<br>y9°y9y10y11y13y26 | 2868.31 | 85.671  | 55730 | 4 | 717.83  | -14.47 |
| P20753 PPIA_SALTY Peptidyl-prolyl cis-trans isomerase A | 3  |                       | VIPGFMIQGGGFNEQMQQK                     | 72  | 19 | 6  | 34.21 | b2y4y11y13y17y19                            | 2109.04 | 76.388  | 44609 | 2 | 1055.03 | 8.80   |
| P20753 PPIA_SALTY Peptidyl-prolyl cis-trans isomerase A | 4  |                       | ISQVPTHDVGPYQNVPTKPVVILS<br>AK          | 161 | 26 | 5  | 18.64 | y2y3y8y11y26                                | 2787.51 | 61.873  | 22132 | 4 | 697.63  | -11.65 |
| P20753 PPIA_SALTY Peptidyl-prolyl cis-trans isomerase A | 5  |                       | TADKDSATSQFFINVADNAFLDH<br>GQRDFGYAVFGK | 116 | 35 | 8  | 21.87 | b2b13y1y3y10y11°y11*y1<br>1                 | 3852.84 | 106.587 | 4939  | 5 | 771.37  | 3.68   |
| P20753 PPIA_SALTY Peptidyl-prolyl cis-trans isomerase A | 6  |                       | GMDVADKISQVPTHDVGPYQNV<br>PTKPVVILSAK   | 154 | 33 | 9  | 58.69 | b3b9b10y4y5y6y8y11y22                       | 3503.83 | 68.111  | 89674 | 4 | 876.71  | -6.97  |
| P20753 PPIA_SALTY Peptidyl-prolyl cis-trans isomerase A | 7  |                       | KPNPPIKNEADNGLR                         | 91  | 15 | 3  | 26.87 | y6y8y12                                     | 1662.87 | 30.031  | 39805 | 3 | 554.96  | -13.14 |
