# Supplementary material for: Phenotypic profile linked to inhibition of the major Zn influx system in Salmonella enterica : proteomics and ionomics investigations
Source: Royal Society of Chemistry journal article supplement (doi:10.1039/c0mb00140f), 2010-10-20
Supplement: c0mb00140f.zip [file c0mb00140f.zip]

**Supplementary Table 1. ICP-MS operating conditions**

|                                              |                                                                       |
|----------------------------------------------|-----------------------------------------------------------------------|
| Element (m/z)                                | Mg (24), K (39), Ca (43), Mn (55), Fe (57), Cu (63), Zn (66), Rb (85) |
| Internal Standard Element (m/z)              | Y (89)                                                                |
| Plasma power (W)                             | 1200                                                                  |
| Carrier gas flow rate (L min <sup>-1</sup> ) | 1.15                                                                  |
| Sample depth                                 | 7.5                                                                   |
| Sample flow rate (mL min <sup>-1</sup> )     | 0.40                                                                  |
| Spray chamber temperature (°C)               | 2                                                                     |
| Extraction lens 1 (V)                        | -150                                                                  |
| Extraction lens 2 (V)                        | -70                                                                   |
| Integration time per point (sec)             | 0.1                                                                   |
| Point per mass                               | 3                                                                     |

**Supplementary Table 2. Relationship between the element concentrations in *S. Typhimurium* MA6926 (wild type, n=16) and SA123*znuA::kan*, (n=16) strains.** Pearson's correlation coefficients are shown. Significant correlation coefficients (95% confidence level) are bold.

| MA6926<br>(wild type)         | Mg            | K             | Ca           | Mn            | Fe           | Cu            | Zn     | Rb |
|-------------------------------|---------------|---------------|--------------|---------------|--------------|---------------|--------|----|
| Mg                            | 1             |               |              |               |              |               |        |    |
| K                             | -0.187        | 1             |              |               |              |               |        |    |
| Ca                            | -0.289        | 0.174         | 1            |               |              |               |        |    |
| Mn                            | <b>0.679</b>  | <b>-0.560</b> | -0.137       | 1             |              |               |        |    |
| Fe                            | <b>0.627</b>  | <b>-0.550</b> | -0.229       | <b>0.772</b>  | 1            |               |        |    |
| Cu                            | 0.433         | <b>-0.591</b> | 0.029        | <b>0.837</b>  | <b>0.563</b> | 1             |        |    |
| Zn                            | 0.257         | 0.055         | 0.504        | 0.327         | 0.029        | <b>0.574</b>  | 1      |    |
| Rb                            | -0.398        | 0.147         | 0.106        | -0.429        | -0.244       | -0.499        | -0.420 | 1  |
| SA123<br>( <i>znuA::kan</i> ) | Mg            | K             | Ca           | Mn            | Fe           | Cu            | Zn     | Rb |
| Mg                            | 1             |               |              |               |              |               |        |    |
| K                             | -0.075        | 1             |              |               |              |               |        |    |
| Ca                            | -0.184        | <b>0.613</b>  | 1            |               |              |               |        |    |
| Mn                            | <b>0.782</b>  | 0.279         | 0.116        | 1             |              |               |        |    |
| Fe                            | 0.468         | -0.329        | -0.206       | 0.404         | 1            |               |        |    |
| Cu                            | <b>0.689</b>  | -0.054        | -0.250       | <b>0.646</b>  | <b>0.557</b> | 1             |        |    |
| Zn                            | <b>-0.693</b> | -0.350        | 0.143        | <b>-0.789</b> | -0.164       | <b>-0.550</b> | 1      |    |
| Rb                            | -0.243        | <b>0.746</b>  | <b>0.783</b> | -0.021        | -0.196       | -0.321        | 0.029  | 1  |

**Supplementary Table 3. Differentially expressed proteins *S. Typhimurium* MA6926 (wild type) and SA123znuA::kan.** Table shows the SwissProt accession number, the protein name, and the measured expression ratio between the two analysed strains grown in Zn depleted and Zn supplemented medium. Yeast enolase 1 is bold and was used as internal standard.

| Accession | Description                                                            | MA6926:SA123znuA::kan_Ratio<br>Zn <sup>2+</sup> depleted medium | MA6926:SA123znuA::kan_Ratio<br>Zn <sup>2+</sup> supplemented medium |
|-----------|------------------------------------------------------------------------|-----------------------------------------------------------------|---------------------------------------------------------------------|
| P15717    | 3-isopropylmalate dehydratase large subunit 1; (a)                     | (a)                                                             |                                                                     |
| P66593    | 30S ribosomal protein S6;                                              | 0.46                                                            | 0.56                                                                |
| P0A1V6    | Ribose-phosphate pyrophosphokinase;                                    | 0.78                                                            | (a)                                                                 |
| P0A1V4    | Adenylate kinase;                                                      | 0.77                                                            | 0.81                                                                |
| P02936    | Outer membrane protein A;                                              | 1.42                                                            | 1.42                                                                |
| P66193    | 50S ribosomal protein L31 type B;                                      | (b)                                                             | (b)                                                                 |
| P10367    | Histidine biosynthesis bifunctional protein hisIE;                     | (b)                                                             |                                                                     |
| P64076    | Enolase;                                                               | 0.73                                                            | 0.64                                                                |
| Q9L6N1    | 5-methyltetrahydropteroyltriglutamate--homocysteine methyltransferase; | 0.93                                                            | 0.88                                                                |
| P0A251    | Alkyl hydroperoxide reductase subunit C;                               | 0.84                                                            | 0.58                                                                |
| P02910    | Histidine-binding periplasmic protein;                                 | 1.84                                                            | 1.22                                                                |
| P63411    | Acetate kinase;                                                        | 0.72                                                            | 0.55                                                                |
| P68684    | 30S ribosomal protein S21;                                             | (b)                                                             |                                                                     |
| P64052    | Elongation factor Ts;                                                  | 0.59                                                            | 0.8                                                                 |
| P0A2M5    | Uracil phosphoribosyltransferase;                                      | 0.55                                                            | 0.69                                                                |
| P65889    | Phosphoribosylaminoimidazole-succinocarboxamide synthase;              | 0.67                                                            | 0.87                                                                |
| P02906    | Sulfate-binding protein;                                               | 1.22                                                            | 1.16                                                                |
| P0A1S2    | DNA-binding protein H-NS;                                              | 0.64                                                            | 0.71                                                                |
| Q7CQ05    | Autonomous glycyl radical cofactor;                                    | 0.41                                                            | 0.42                                                                |
| O33921    | Glucose-1-phosphatase;                                                 | (a)                                                             | 2.46                                                                |
| P66955    | Transaldolase B;                                                       | 0.98                                                            | 1.13                                                                |
| P23905    | D-galactose-binding periplasmic protein;                               | (a)                                                             | 2.23                                                                |
| P0A1R6    | DNA-binding protein HU-alpha;                                          | 0.47                                                            | 0.81                                                                |
| Q8ZRP4    | 2,3,4,5-tetrahydropyridine-2.6-dicarboxylate N-succinyltransferase;    | 0.48                                                            | 0.94                                                                |
| Q9ZF60    | Glutamate/aspartate periplasmic-binding protein;                       | 2.59                                                            | 1.2                                                                 |
| P66541    | 30S ribosomal protein S2;                                              | 0.31                                                            | 0.51                                                                |
| Q8ZQU3    | Succinate dehydrogenase flavoprotein subunit;                          | (a)                                                             |                                                                     |
| P0A1P6    | Glutamine synthetase;                                                  | 0.76                                                            | 0.58                                                                |
| P0A1P0    | Glyceraldehyde-3-phosphate dehydrogenase;                              | 0.63                                                            | 0.68                                                                |
| Q7CPL7    | 50S ribosomal protein L17;                                             | (b)                                                             | (b)                                                                 |
| P58661    | Aspartate aminotransferase;                                            | 1.04                                                            | 0.68                                                                |
| P67605    | UPF0265 protein yeeX;                                                  | (b)                                                             |                                                                     |
| Q8ZQT5    | Protein tolB;                                                          | 1.88                                                            | 1.48                                                                |
| Q56073    | Chaperone protein dnaK;                                                | 0.73                                                            | 0.8                                                                 |
| P05989    | Ketol-acid reductoisomerase;                                           | 1.16                                                            | 1.13                                                                |
| P61179    | 50S ribosomal protein L22;                                             | 0.28                                                            | (b)                                                                 |
| Q7CPK0    | sn-glycerol-3-phosphate-binding periplasmic protein ugpB;              | (a)                                                             | (a)                                                                 |
| P26982    | Protease do;                                                           | 2.34                                                            | 1.48                                                                |
| P0A2H9    | Thiol:disulfide interchange protein dsbA;                              | 2.32                                                            | 1.45                                                                |
| Q9L4T0    | S-ribosylhomocysteine lyase;                                           | 0.74                                                            | 0.69                                                                |
| P0A7Z7    | DNA-directed RNA polymerase subunit alpha;                             | 0.69                                                            | 0.7                                                                 |
| P26976    | Non-specific acid phosphatase;                                         | 0.25                                                            | (a)                                                                 |
| P67537    | UPF0250 protein ybeD;                                                  | (b)                                                             |                                                                     |
| P0AA28    | Thioredoxin-1;                                                         | 0.61                                                            | 0.71                                                                |
| P0A7X0    | 30S ribosomal protein S8;                                              | 0.42                                                            | 0.75                                                                |
| P06196    | Silent protein ushA(0);                                                |                                                                 | (a)                                                                 |
| P0A7W4    | 30S ribosomal protein S5;                                              | 0.35                                                            | 0.61                                                                |
| P25077    | Malate dehydrogenase;                                                  | 2.83                                                            | 0.93                                                                |
| Q9L9I8    | Thiamine-phosphate pyrophosphorylase;                                  | (b)                                                             |                                                                     |
| P60446    | 50S ribosomal protein L3;                                              | 0.45                                                            | 0.5                                                                 |
| P06179    | Flagellin;                                                             | (a)                                                             | 1.02                                                                |
| P66038    | 6,7-dimethyl-8-ribityllumazine synthase;                               | 0.47                                                            | 0.92                                                                |
| P66032    | 3,4-dihydroxy-2-butanone 4-phosphate synthase;                         | (b)                                                             |                                                                     |
| P67904    | 30S ribosomal protein S10;                                             | 0.45                                                            | 0.61                                                                |
| P0A2C5    | D-ribose-binding periplasmic protein;                                  | 0.93                                                            | 1.48                                                                |
| P06202    | Periplasmic oligopeptide-binding protein;                              | 4.06                                                            | 1.57                                                                |
| Q7CR87    | Chaperone surA;                                                        | 2.41                                                            | 1.39                                                                |
| P0A2B1    | 30S ribosomal protein S20;                                             | (b)                                                             |                                                                     |
| P0A1H5    | Elongation factor Tu;                                                  | 1.11                                                            | 0.68                                                                |
| P0A1H3    | Elongation factor G;                                                   | 1.08                                                            | 0.78                                                                |
| P53636    | Superoxide dismutase [Cu-Zn] 1;                                        | 1.05                                                            | 1.34                                                                |
| P17215    | Leu/Ile/Val/Thr-binding protein;                                       | (a)                                                             | 1.73                                                                |
| P0A2A3    | 50S ribosomal protein L1;                                              | 0.48                                                            | 0.62                                                                |
| P0A2A1    | 50S ribosomal protein L19;                                             | (b)                                                             |                                                                     |
| P66764    | S-adenosylmethionine synthetase;                                       | (a)                                                             | (a)                                                                 |

| Accession     | Description                                                                                            | MA6926:SA123znuA::kan_Ratio<br>Zn <sup>2+</sup> depleted medium | MA6926:SA123znuA::kan_Ratio<br>Zn <sup>2+</sup> supplemented medium |
|---------------|--------------------------------------------------------------------------------------------------------|-----------------------------------------------------------------|---------------------------------------------------------------------|
| Q8ZRE7        | UPF0345 protein yaiE;                                                                                  |                                                                 | (b)                                                                 |
| O54297        | 30S ribosomal protein S4;                                                                              | 0.46                                                            | 0.49                                                                |
| P0A1E3        | Cysteine synthase A;                                                                                   | 0.94                                                            | 0.57                                                                |
| P65702        | Phosphoglycerate kinase;                                                                               | 0.72                                                            | 0.65                                                                |
| P69936        | NADP-dependent L-serine/L-allo-threonine dehydrogenase ydfG;                                           | 0.57                                                            | 1.2                                                                 |
| P00499        | ATP phosphoribosyltransferase;                                                                         | (b)                                                             |                                                                     |
| Q7CR46        | Anti-adapter protein iraP;                                                                             | (b)                                                             | (a)                                                                 |
| O68926        | Bacterioferritin;                                                                                      | (a)                                                             |                                                                     |
| P0A1D5        | 10 kDa chaperonin;                                                                                     | 0.68                                                            | 0.62                                                                |
| <b>P00924</b> | <b>Enolase 1;</b>                                                                                      |                                                                 |                                                                     |
| P0A1D3        | 60 kDa chaperonin;                                                                                     | 0.72                                                            | 0.58                                                                |
| Q8ZP65        | Probable thiol peroxidase;                                                                             | 0.46                                                            | 0.55                                                                |
| P66313        | 50S ribosomal protein L6;                                                                              | 0.47                                                            | 0.59                                                                |
| P0A1Z2        | Chaperone protein skp;                                                                                 | 2.14                                                            | 0.9                                                                 |
| P0A9Y9        | Cold shock-like protein cspC;                                                                          | 0.53                                                            | 0.44                                                                |
| P41031        | Thiosulfate-binding protein;                                                                           | 1.75                                                            | 1.27                                                                |
| Q8ZP20        | Periplasmic trehalase;                                                                                 | (a)                                                             | 3.22                                                                |
| P0A2R4        | DNA-directed RNA polymerase subunit beta';                                                             | (a)                                                             |                                                                     |
| Q8ZKQ1        | Autoinducer 2-binding protein lsrB;                                                                    | (a)                                                             | 1.51                                                                |
| P0A299        | 50S ribosomal protein L7/L12;                                                                          | 0.57                                                            | 0.54                                                                |
| P0A297        | 50S ribosomal protein L10;                                                                             | 0.66                                                            | 0.76                                                                |
| P40732        | Acetylornithine/succinyldiaminopimelate aminotransferase;                                              | (b)                                                             |                                                                     |
| Q8ZK81        | 30S ribosomal protein S18;                                                                             | 0.23                                                            |                                                                     |
| Q8ZK80        | 50S ribosomal protein L9;                                                                              | 0.58                                                            | 0.57                                                                |
| P0A7K0        | 50S ribosomal protein L11;                                                                             | 0.29                                                            | 0.54                                                                |
| Q8ZKP7        | Triosephosphate isomerase;                                                                             | 0.53                                                            | 0.75                                                                |
| P0A1W6        | Leucine-specific-binding protein;                                                                      | 4.81                                                            | (a)                                                                 |
| P0A283        | Glucose-specific phosphotransferase enzyme IIA component;                                              | 0.73                                                            | 0.71                                                                |
| P40720        | Fumarate hydratase class I, aerobic;                                                                   | (a)                                                             |                                                                     |
| P20753        | Peptidyl-prolyl cis-trans isomerase A;                                                                 | (a)                                                             | (a)                                                                 |
| P10372        | 1-(5-phosphoribosyl)-5-[(5-phosphoribosylamino)methylideneamino]<br>imidazole-4-carboxamide isomerase; | (b)                                                             |                                                                     |
| P10370        | Histidinol dehydrogenase;                                                                              | (b)                                                             |                                                                     |
| O54296        | 30S ribosomal protein S11;                                                                             | (b)                                                             |                                                                     |
| P0A1F8        | Aspartate-semialdehyde dehydrogenase;                                                                  | (b)                                                             |                                                                     |
| P0A1S4        | DNA-binding protein stpA;                                                                              | (b)                                                             |                                                                     |
| P0A2A1        | 50S ribosomal protein L19;                                                                             | (b)                                                             |                                                                     |
| P0A2B3        | 30S ribosomal protein S7;                                                                              | (b)                                                             |                                                                     |
| P0A2C7        | Spermidine/putrescine-binding periplasmic protein;                                                     | (b)                                                             |                                                                     |
| P0A7V6        | 30S ribosomal protein S3;                                                                              | (b)                                                             |                                                                     |
| P0AA02        | Transcription antitermination protein nusG;                                                            | (b)                                                             |                                                                     |
| P14146        | Virulence transcriptional regulatory protein phoP;                                                     | (b)                                                             |                                                                     |
| P16657        | Enoyl-[acyl-carrier-protein] reductase [NADH];                                                         | (b)                                                             |                                                                     |
| P60726        | 50S ribosomal protein L4;                                                                              | (b)                                                             |                                                                     |
| P66643        | 30S ribosomal protein S9;                                                                              | (b)                                                             |                                                                     |
| P67617        | Probable Fe(2+)-trafficking protein;                                                                   | (b)                                                             |                                                                     |
| Q8ZLM1        | 30S ribosomal protein S13;                                                                             | (b)                                                             |                                                                     |
| Q8ZQS2        | 2,3-bisphosphoglycerate-dependent phosphoglycerate mutase;                                             | (b)                                                             |                                                                     |
| O54296        | 30S ribosomal protein S11;                                                                             | (b)                                                             |                                                                     |
| P0A1F8        | Aspartate-semialdehyde dehydrogenase;                                                                  | (b)                                                             |                                                                     |
| P0A1S4        | DNA-binding protein stpA;                                                                              | (b)                                                             |                                                                     |
| P0A2A1        | 50S ribosomal protein L19;                                                                             | (b)                                                             |                                                                     |
| P0A2B3        | 30S ribosomal protein S7;                                                                              | (b)                                                             |                                                                     |
| P0A2F6        | Single-stranded DNA-binding protein;                                                                   | (a)                                                             |                                                                     |
| P55900        | Phosphoserine aminotransferase;                                                                        | (a)                                                             |                                                                     |
| P62405        | 50S ribosomal protein L5;                                                                              | (a)                                                             |                                                                     |
| P65215        | 50S ribosomal protein L5;                                                                              | (a)                                                             |                                                                     |
| Q7CPD8        | UPF0438 protein yifE;                                                                                  | (a)                                                             |                                                                     |
| Q7CPL4        | 50S ribosomal protein L16;                                                                             | (a)                                                             |                                                                     |
| Q7CPP7        | 50S ribosomal protein L21;                                                                             | (a)                                                             |                                                                     |
| Q8ZL56        | 2,3-bisphosphoglycerate-independent phosphoglycerate mutase;                                           | (a)                                                             |                                                                     |
| Q8ZLD7        | 2,3-bisphosphoglycerate-independent phosphoglycerate mutase;                                           | (a)                                                             |                                                                     |
| P0A1R8        | DNA-binding protein HU-beta                                                                            | (b)                                                             |                                                                     |
| P0A2C5        | D-ribose-binding periplasmic protein                                                                   | (b)                                                             |                                                                     |
| P0A8B8        | UPF0133 protein ybaB                                                                                   | (b)                                                             |                                                                     |
| P52616        | Phase 2 flagellin                                                                                      | (b)                                                             |                                                                     |
| P66170        | 50S ribosomal protein L29                                                                              | (b)                                                             |                                                                     |
| P67091        | Universal stress protein F                                                                             | (b)                                                             |                                                                     |
| Q8ZRE7        | UPF0345 protein yaiE                                                                                   | (b)                                                             |                                                                     |

(a) Exclusively found in the MA6926 (wild type) strain

(b) Exclusively found in the SA123znuA::kan strain
