# Supplementary material for: Phenotypic profile linked to inhibition of the major Zn influx system in Salmonella enterica : proteomics and ionomics investigations
Source: Royal Society of Chemistry journal article supplement (doi:10.1039/c0mb00140f), 2010-10-20
Supplement: c0mb00140f.zip [file c0mb00140f.zip]

MA6926 + Zn(II) LC-MS run 3: 6926\_Zn\_220709\_1a2\_03

| Protein name                                                | Peptide Rank | Peptide Modification | Peptide Sequence           | Peptide sequence start | Peptide sequence Length | Peptide Matched Products | Peptide Score | By Matches                                                              | Precursor MH+ (Da) | Retention time (min) | Intensity | z | Precursor m/z | MH+ Error (ppm) |
|-------------------------------------------------------------|--------------|----------------------|----------------------------|------------------------|-------------------------|--------------------------|---------------|-------------------------------------------------------------------------|--------------------|----------------------|-----------|---|---------------|-----------------|
| P0A2H9 DSBA_SALTY Thiol:disulfide interchange protein dsbA; | 1            |                      | AAADLQLQGVPAMFVNGK         | 158                    | 18                      | 28                       | 247.05        | b2b4b5b6b7b8b9b10b12b14b18y2y3*y3y4y5y6y7y8*y8y9y10y11*y11y12*y12y14y18 | 1829.97            | 80.521               | 219558    | 2 | 915.49        | 4.54            |
| P0A2H9 DSBA_SALTY Thiol:disulfide interchange protein dsbA; | 2            |                      | YQINPQGMDTSSMDVVFVQQYADTVK | 176                    | 25                      | 21                       | 125.73        | b2*b2b3b4b6b7b9y1y3y4y5y6y7*y7y8*y8y9*y9y12*y12y25                      | 2865.31            | 86.186               | 113273    | 3 | 955.78        | 1.62            |
| P0A2H9 DSBA_SALTY Thiol:disulfide interchange protein dsbA; | 3            |                      | TQTVQSAADIR                | 116                    | 11                      | 14                       | 55.96         | b2°b2*b2b3°b8b11y2y6y7°y7*y7y8y9y11                                     | 1189.61            | 35.194               | 57732     | 2 | 595.31        | -4.82           |
| P0A2H9 DSBA_SALTY Thiol:disulfide interchange protein dsbA; | 4            |                      | YHVEFLGPLGK                | 77                     | 11                      | 8                        | 52.95         | b2b3b4b5b10y1y2y3                                                       | 1259.67            | 70.518               | 36297     | 2 | 630.34        | -6.88           |
| P0A2H9 DSBA_SALTY Thiol:disulfide interchange protein dsbA; | 5            |                      | ELTQAWAVAMALGVEDK          | 88                     | 17                      | 4                        | 16.31         | b5°b5b10y10                                                             | 1831.90            | 45.372               | 1869      | 3 | 611.31        | -13.39          |
| P0A2H9 DSBA_SALTY Thiol:disulfide interchange protein dsbA; | 6            |                      | SLVAQQEKAAADLQLQGVPAMFVNGK | 150                    | 26                      | 5                        | 18.28         | b14°b14y6y10y13                                                         | 2713.42            | 81.337               | 11995     | 3 | 905.14        | -6.12           |
| P0A2H9 DSBA_SALTY Thiol:disulfide interchange protein dsbA; | 7            |                      | VFVDAGVKGEDYDAAWSFVVVK     | 128                    | 22                      | 4                        | 13.43         | b6b13°b13y11                                                            | 2416.20            | 71.370               | 9131      | 3 | 806.07        | 6.06            |
| P0A2H9 DSBA_SALTY Thiol:disulfide interchange protein dsbA; | 8            | Phosphoryl STY(3)    | ELTQAWAVAMALGVEDK          | 88                     | 17                      | 4                        | 23.3          | b14y13y14°y14                                                           | 1911.91            | 101.287              | 1643      | 3 | 637.97        | 13.86           |
| P0A2H9 DSBA_SALTY Thiol:disulfide interchange protein dsbA; | 9            | Oxidation+M(10)      | ELTQAWAVAMALGVEDK          | 88                     | 17                      | 8                        | 40.98         | b7°b7b8°b8b11°b11y8y9                                                   | 1847.90            | 136.258              | 2777      | 2 | 924.45        | -11.43          |
| P0A2H9 DSBA_SALTY Thiol:disulfide interchange protein dsbA; | 10           |                      | PAMFVNGK                   | 168                    | 8                       | 2                        | 20.9          | b3b4                                                                    | 863.44             | 80.515               | 7059      | 1 | 863.44        | -8.77           |
| P0A1D5 CH10_SALTY 10 kDa chaperonin;                        | 1            |                      | VGDIVIFNDGYGVK             | 60                     | 14                      | 19                       | 202.1         | b3b4b5°b5b6b13°b13y3y4y5y6y7y8y9y10y11y12y13y14                         | 1495.77            | 73.295               | 202249    | 2 | 748.39        | -4.49           |
| P0A1D5 CH10_SALTY 10 kDa chaperonin;                        | 2            |                      | ILDNGTVQPLDVK              | 47                     | 13                      | 26                       | 195.47        | b2b7°b7b8°b8b9b10b11°b11y2y3y4y5y6*y6y7y8y9y10y11°y11*y11y12*y12y13*y13 | 1411.78            | 57.325               | 189411    | 2 | 706.39        | -2.51           |
| P0A1D5 CH10_SALTY 10 kDa chaperonin;                        | 3            |                      | SAGGIVLTGSAAGK             | 20                     | 14                      | 20                       | 141.45        | b2b3°b3b4b5°b5b6°b6b11b14y2y3y4y6y7y8°y8y9y12y14                        | 1188.65            | 43.672               | 116246    | 2 | 594.83        | -6.88           |
| P0A1D5 CH10_SALTY 10 kDa chaperonin;                        | 4            |                      | GEIIAVGK                   | 37                     | 8                       | 6                        | 54.08         | y2y3y4y5y6y8                                                            | 786.46             | 41.597               | 23811     | 2 | 393.74        | -10.79          |
| P0A1D5 CH10_SALTY 10 kDa chaperonin;                        | 5            |                      | SIRPLHDR                   | 1                      | 8                       | 6                        | 36.09         | b1b3°b3b7y5y8                                                           | 993.55             | 26.969               | 4087      | 2 | 497.28        | -9.21           |
| P0A1D5 CH10_SALTY 10 kDa chaperonin;                        | 6            |                      | STRGEIIAVGK                | 34                     | 11                      | 5                        | 55.5          | b3b5b8y3y4                                                              | 1130.65            | 37.928               | 50233     | 2 | 565.83        | -6.80           |
| P0A1D5 CH10_SALTY 10 kDa chaperonin;                        | 7            |                      | SEKIDNEEVLIMSESILAIVEA     | 74                     | 23                      | 5                        | 19.45         | b5°b5b10°b10b18                                                         | 2547.29            | 136.252              | 2032      | 3 | 849.77        | 4.41            |
| P0A1D5 CH10_SALTY 10 kDa chaperonin;                        | 8            | Phosphoryl STY(10)   | IDNEEVLIMSESILAIVEA        | 77                     | 20                      | 3                        | 14.37         | b3b8y10                                                                 | 2283.04            | 98.400               | 9111      | 4 | 571.52        | -7.91           |
| P0A1D5 CH10_SALTY 10 kDa chaperonin;                        | 9            |                      | SAGGIVLTGSAAGK             | 20                     | 14                      | 0                        | 3.64          |                                                                         | 1170.64            | 43.617               | 18736     | 2 | 585.82        | -2.29           |

|                                             |    |                      |                               |     |    |    |        |                                                                                                                                                        |         |         |        |   |         |        |
|---------------------------------------------|----|----------------------|-------------------------------|-----|----|----|--------|--------------------------------------------------------------------------------------------------------------------------------------------------------|---------|---------|--------|---|---------|--------|
| [P0A1S2]HNS_SALTY DNA-binding protein H-NS; | 1  |                      | EMLIADGIDPNELLNSMAAAK         | 62  | 21 | 47 | 342.54 | b2°b2b3°b3b4°b4b5°b5b6°<br>b6b7°b7b8°b8b9b10b12°b1<br>2b13b14°b14b18b21y1y2y<br>3y4y5y6y7°y7*y7y8y9y10y<br>12*y12y13°y13y14°y14y15<br>y16y17°y17y18y21 | 2216.11 | 96.512  | 436549 | 2 | 1108.56 | 9.36   |
| [P0A1S2]HNS_SALTY DNA-binding protein H-NS; | 2  |                      | YSYVDENGETK                   | 96  | 11 | 9  | 84.74  | b2y2y3y5y7y8y9y10y11                                                                                                                                   | 1304.56 | 32.779  | 64190  | 2 | 652.79  | -0.19  |
| [P0A1S2]HNS_SALTY DNA-binding protein H-NS; | 3  |                      | REEESAAAAEVEER                | 40  | 14 | 7  | 38.52  | b6b7°b7b8y2y3y14                                                                                                                                       | 1575.73 | 31.873  | 41221  | 2 | 788.37  | 4.88   |
| [P0A1S2]HNS_SALTY DNA-binding protein H-NS; | 4  |                      | TPAVIKK                       | 114 | 7  | 10 | 50.67  | b1°b1b2°b2b3y2y3y4y5y7                                                                                                                                 | 756.49  | 19.422  | 22788  | 2 | 378.75  | -14.12 |
| [P0A1S2]HNS_SALTY DNA-binding protein H-NS; | 5  | Carbamidomethyl+C(6) | AQARECTLETLEEMLEK             | 15  | 17 | 7  | 27.39  | b1b5°b5°b5b6b11y10                                                                                                                                     | 2050.99 | 56.626  | 4481   | 3 | 684.33  | 4.64   |
| [P0A1S2]HNS_SALTY DNA-binding protein H-NS; | 6  | Carbamidomethyl+C(2) | ECTLETLEEMLEK                 | 19  | 13 | 4  | 20.63  | b7°b7y7y9                                                                                                                                              | 1624.77 | 88.106  | 1582   | 3 | 542.26  | 16.98  |
| [P0A1S2]HNS_SALTY DNA-binding protein H-NS; | 7  |                      | YSYVDENGETKTWTGQGR            | 96  | 18 | 17 | 108.51 | b3°b3y4°y4y5y6y7y8*y8y1<br>1°y11y12*y12y14*y14y17°<br>y17                                                                                              | 2090.93 | 46.733  | 147245 | 3 | 697.65  | -7.24  |
| [P0A1S2]HNS_SALTY DNA-binding protein H-NS; | 8  | Carbamidomethyl+C(2) | ECTLETLEEMLEKLEV VNER         | 19  | 21 | 3  | 22.32  | b14y3y4                                                                                                                                                | 2563.24 | 71.954  | 12713  | 3 | 855.09  | -8.29  |
| [P0A1S2]HNS_SALTY DNA-binding protein H-NS; | 9  |                      | EMLIADGIDPNELLNSMAAAKSGT<br>K | 62  | 25 | 3  | 35.19  | b7b8b9                                                                                                                                                 | 2589.28 | 90.400  | 10016  | 3 | 863.77  | -2.45  |
| [P0A1S2]HNS_SALTY DNA-binding protein H-NS; | 10 | Carbamidomethyl+C(6) | AQARECTLETLEEMLEK             | 15  | 17 | 4  | 26.14  | b8b10b12y4                                                                                                                                             | 2050.95 | 63.158  | 2132   | 2 | 1025.98 | -12.97 |
| [P0A1S2]HNS_SALTY DNA-binding protein H-NS; | 11 | Oxidation+M(17)      | EMLIADGIDPNELLNSMAAAK         | 62  | 21 | 9  | 44.84  | b3b5b8°b8b10°b10y5y10y1<br>2                                                                                                                           | 2232.06 | 104.270 | 1868   | 3 | 744.69  | -13.89 |
| [P0A1H5]EFTU_SALTY Elongation factor Tu;    | 1  |                      | AIDKPFLPIEDVFSISGR            | 205 | 19 | 21 | 153.38 | b2b3b4°b4b7b8b9y1y2y3y<br>4y5y6°y6y7y8y9°y9y11y15<br>y19                                                                                               | 2117.14 | 104.358 | 364011 | 3 | 706.39  | -9.57  |
| [P0A1H5]EFTU_SALTY Elongation factor Tu;    | 2  |                      | TTLTAAITVLAK                  | 25  | 13 | 16 | 140.17 | b2°b2b4°b4b5°b5y2y3y4y5<br>y6y7y8y9y10y11                                                                                                              | 1303.77 | 84.312  | 284800 | 2 | 652.39  | -6.83  |
| [P0A1H5]EFTU_SALTY Elongation factor Tu;    | 3  |                      | ELLSQYDFPGDDTPIVR             | 155 | 17 | 26 | 188.84 | b2°b2b6°b6°b6b7b9b13b1<br>6y1y2y3y4y5y6y8y9°y9y10<br>°y10y11y12°y12y13y14y17                                                                           | 1964.97 | 76.619  | 229683 | 2 | 982.99  | 6.15   |
| [P0A1H5]EFTU_SALTY Elongation factor Tu;    | 4  |                      | IIELAGFLDSYIPEPER             | 188 | 17 | 31 | 251.41 | b2b3b4b5b6b7b12°b12b14<br>y1y2y3°y3y4°y4y5°y5y6y7<br>y8°y8y9°y9y10°y10y11y12<br>y13y14y15y17                                                           | 1962.03 | 101.590 | 209617 | 2 | 981.52  | 3.61   |
| [P0A1H5]EFTU_SALTY Elongation factor Tu;    | 5  |                      | AGENVGVLLR                    | 270 | 10 | 7  | 68.11  | y2y3y4y5y6y7y10                                                                                                                                        | 1027.58 | 56.240  | 191403 | 2 | 514.29  | -11.29 |
| [P0A1H5]EFTU_SALTY Elongation factor Tu;    | 6  |                      | GITINTSHVEYDTPTR              | 59  | 16 | 20 | 180.45 | b2b3°b3b9b10b12y3y4y5y<br>6y7°y7y8y9y10y12*y12y13<br>y14y16                                                                                            | 1803.86 | 49.410  | 185236 | 3 | 601.96  | -13.40 |
| [P0A1H5]EFTU_SALTY Elongation factor Tu;    | 7  |                      | QVGVPYIIVFLNK                 | 124 | 13 | 8  | 47.86  | b3b4°b4b13y4y9y11y13                                                                                                                                   | 1489.87 | 98.706  | 183214 | 2 | 745.44  | -4.59  |
| [P0A1H5]EFTU_SALTY Elongation factor Tu;    | 8  |                      | TTDVTGTIELPEGVEMVMPGDNI<br>K  | 334 | 24 | 32 | 190.07 | b1b2b3°b3b4b5°b5b8°b8b1<br>0°b10b16b17°b17b18°b18y<br>3y5y6°y6°y6y7y8y9y10*y1<br>0y12y14°y14y15y20y24                                                  | 2546.26 | 86.406  | 180617 | 2 | 1273.63 | 8.73   |
| [P0A1H5]EFTU_SALTY Elongation factor Tu;    | 9  |                      | ALEGDAEWEAK                   | 177 | 11 | 11 | 81.94  | b2b6b9y1y2y4y6y7y8y9y1<br>1                                                                                                                            | 1218.56 | 46.108  | 118469 | 2 | 609.78  | -3.51  |
| [P0A1H5]EFTU_SALTY Elongation factor Tu;    | 10 | Carbamidomethyl+C(3) | STCTGVEMFR                    | 253 | 10 | 6  | 51.88  | y4y6y7°y7y8y10                                                                                                                                         | 1187.51 | 52.686  | 99774  | 2 | 594.26  | -3.19  |

|                                                 |    |                       |                                 |     |    |    |        |                                                                                        |         |         |        |   |         |        |
|-------------------------------------------------|----|-----------------------|---------------------------------|-----|----|----|--------|----------------------------------------------------------------------------------------|---------|---------|--------|---|---------|--------|
| P0A1H5 EFTU_SALTY Elongation factor Tu;         | 11 | Carbamidomethyl+C(1)  | CDMVDDEELLELVEMEV               | 137 | 18 | 10 | 54.85  | b2b3y2y3y5°y5y6y7y8y18                                                                 | 2224.00 | 105.670 | 34829  | 2 | 1112.51 | 9.99   |
| P0A1H5 EFTU_SALTY Elongation factor Tu;         | 12 |                       | VGEEVEIVGIK                     | 238 | 11 | 9  | 50.52  | b2b4b7°b7b8b10b11y2y11                                                                 | 1171.67 | 44.920  | 19547  | 2 | 586.34  | 9.38   |
| P0A1H5 EFTU_SALTY Elongation factor Tu;         | 13 |                       | GQVLAKPGTIKPHTK                 | 289 | 15 | 5  | 18.13  | b5°b5y2y3y9                                                                            | 1574.92 | 29.474  | 3663   | 3 | 525.64  | -11.24 |
| P0A1H5 EFTU_SALTY Elongation factor Tu;         | 14 |                       | MVVTLIHPIAMDDGLR                | 358 | 16 | 20 | 193.16 | b3b4°b4b5°b5y3y4y5y6°y6y7y8°y8y9y10°y10y11y12y13y15                                    | 1780.91 | 78.779  | 502983 | 3 | 594.31  | -17.62 |
| P0A1H5 EFTU_SALTY Elongation factor Tu;         | 15 |                       | TVGAGVVAK                       | 382 | 9  | 3  | 38.26  | y3y7y8                                                                                 | 801.47  | 28.367  | 118292 | 2 | 401.24  | -17.59 |
| P0A1H5 EFTU_SALTY Elongation factor Tu;         | 16 |                       | EHILLGR                         | 117 | 7  | 3  | 37.45  | b3y4y5                                                                                 | 837.48  | 40.751  | 35597  | 2 | 419.24  | -16.62 |
| P0A1H5 EFTU_SALTY Elongation factor Tu;         | 17 |                       | LLDEGR                          | 264 | 6  | 2  | 26.84  | b4y5                                                                                   | 702.37  | 28.183  | 7085   | 1 | 702.37  | -12.34 |
| P0A1H5 EFTU_SALTY Elongation factor Tu;         | 18 | Carbamidomethyl+C(7)  | HYAHVDCPGHADYVK                 | 75  | 15 | 3  | 18.13  | b9y4y6                                                                                 | 1768.76 | 35.823  | 6310   | 4 | 442.95  | -12.15 |
| P0A1H5 EFTU_SALTY Elongation factor Tu;         | 19 |                       | NMITGAAQMDGAILVVAATDGP MPQTR    | 90  | 27 | 3  | 11.9   | b10y7y13                                                                               | 2729.36 | 92.435  | 6302   | 3 | 910.46  | 5.28   |
| P0A1H5 EFTU_SALTY Elongation factor Tu;         | 20 |                       | TKPHVNVGTIGHVDHGK               | 8   | 17 | 4  | 16.31  | b7y4y10°y10                                                                            | 1795.92 | 39.323  | 2603   | 4 | 449.74  | -19.78 |
| P0A1H5 EFTU_SALTY Elongation factor Tu;         | 21 |                       | GTVVTGRVER                      | 224 | 10 | 3  | 26.9   | b9y3y8                                                                                 | 1073.60 | 25.814  | 60094  | 2 | 537.30  | -8.53  |
| P0A1H5 EFTU_SALTY Elongation factor Tu;         | 22 | Carbamidomethyl+C(14) | QVGVPYIIVFLNKCDMVDDEELLE LVEMEV | 124 | 31 | 6  | 62.25  | b7y4y5y6y7y8                                                                           | 3694.87 | 127.074 | 23825  | 3 | 1232.29 | 7.07   |
| P0A1H5 EFTU_SALTY Elongation factor Tu;         | 23 |                       | ALEGDAEWEAKIILAGFLDSYIPE PER    | 177 | 28 | 8  | 53.76  | b11b12y4y5y6y9y12°y12                                                                  | 3161.55 | 124.236 | 5438   | 3 | 1054.52 | -4.40  |
| P0A1H5 EFTU_SALTY Elongation factor Tu;         | 24 |                       | AFDQIDNAPEEKAR                  | 45  | 14 | 4  | 27.57  | b3b5y11y13                                                                             | 1603.78 | 83.356  | 4876   | 2 | 802.39  | 3.58   |
| P0A1H5 EFTU_SALTY Elongation factor Tu;         | 25 |                       | ARGITINTSHVEYDTPTR              | 57  | 18 | 5  | 26.57  | b4y6y10°y10y11                                                                         | 2031.03 | 40.022  | 2095   | 3 | 677.68  | 3.91   |
| P0A1H5 EFTU_SALTY Elongation factor Tu;         | 26 | Oxidation+M(1)        | MVVTLIHPIAMDDGLR                | 358 | 16 | 3  | 25.53  | y5y8y9                                                                                 | 1796.91 | 73.480  | 19930  | 3 | 599.64  | -14.61 |
| P0A1H5 EFTU_SALTY Elongation factor Tu;         | 27 | Oxidation+M(2)        | NMITGAAQMDGAILVVAATDGP MPQTR    | 90  | 27 | 7  | 21.9   | b8y5°y5°y5y6°y6°y6                                                                     | 2745.31 | 71.193  | 2525   | 4 | 687.08  | -10.58 |
| P0A1H5 EFTU_SALTY Elongation factor Tu;         | 28 | Oxidation+M(18)       | TTDVTGTIELPEGVEMVMPGDNI K       | 334 | 24 | 4  | 35.46  | b13y7y8y9                                                                              | 2562.25 | 79.167  | 1981   | 2 | 1281.63 | 5.81   |
| P0A1H5 EFTU_SALTY Elongation factor Tu;         | 29 |                       | ENVGVLLR                        | 272 | 8  | 0  | 2.02   |                                                                                        | 899.52  | 56.315  | 3846   | 2 | 450.26  | -13.77 |
| P0A1H5 EFTU_SALTY Elongation factor Tu;         | 30 |                       | PIEDVFSISGR                     | 213 | 11 | 2  | 13.18  | b5b7                                                                                   | 1219.62 | 104.354 | 1874   | 2 | 610.31  | -12.71 |
| P0A1H5 EFTU_SALTY Elongation factor Tu;         | 31 |                       | GITINTSHVEYDTPTR                | 59  | 16 | 0  | 4.45   |                                                                                        | 1785.86 | 49.406  | 11101  | 3 | 595.96  | -7.04  |
| P0A1R6 DBHA_SALTY DNA-binding protein HU-alpha; | 1  |                       | IAAANVPAFVSGK                   | 70  | 13 | 27 | 190.7  | b2b3b4b5°b5b6°b6b10y1y2y3°y3y4°y4y5y6y7°y7y8y9y10°y10y11°y11°y11y12y13                 | 1244.69 | 59.409  | 830104 | 2 | 622.85  | -4.41  |
| P0A1R6 DBHA_SALTY DNA-binding protein HU-alpha; | 2  |                       | AALESTLAAITESLKEGDAVQLVG FGTFK  | 22  | 29 | 33 | 262.01 | b2b3b4b6°b6b7b8b9b12b13b16b23b26y1y2y3y4y6°y6y7y8y10y11°y11y13y14y17y19y21y22y24y25y29 | 2966.57 | 114.615 | 525740 | 3 | 989.53  | 0.74   |
| P0A1R6 DBHA_SALTY DNA-binding protein HU-alpha; | 3  |                       | AALESTLAAITESLK                 | 22  | 15 | 6  | 48.38  | b3b6b7y5y12y14                                                                         | 1517.81 | 96.656  | 14720  | 2 | 759.41  | -20.83 |

|                                                              |    |                      |                                            |     |    |    |        |                                                                                                 |         |        |        |   |         |        |
|--------------------------------------------------------------|----|----------------------|--------------------------------------------|-----|----|----|--------|-------------------------------------------------------------------------------------------------|---------|--------|--------|---|---------|--------|
| [P06202]OPPA_SALTY Periplasmic oligopeptide-binding protein; | 1  |                      | LADPNTASPYASYLQYGHIANIDD<br>IIAGKKPATDLGVK | 125 | 38 | 36 | 232.74 | b2b3b4°b4b5°b5b6°b6°b6b7°b7°b7b8°b8°b8b10b11b13y2y3y4y6y8y9y11y12y16y19y22y23y27y30y31y35y36y38 | 4001.01 | 82.901 | 371412 | 5 | 801.01  | -13.30 |
| [P06202]OPPA_SALTY Periplasmic oligopeptide-binding protein; | 2  |                      | AEQQLDKDSAIVPVYYYVNAR                      | 494 | 21 | 27 | 212.59 | b2b4b5°b5b6b7°b7b8b9°b9b10°b10b11°b11b12y1y3°y3y4y5y6y7y8y9°y9y10y21                            | 2442.22 | 72.882 | 178788 | 3 | 814.75  | -3.60  |
| [P06202]OPPA_SALTY Periplasmic oligopeptide-binding protein; | 3  |                      | LVEPEWFK                                   | 352 | 8  | 9  | 67.3   | y2y3y4°y4y5y6°y6y7y8                                                                            | 1047.54 | 70.879 | 155000 | 2 | 524.27  | -9.21  |
| [P06202]OPPA_SALTY Periplasmic oligopeptide-binding protein; | 4  |                      | WSDGTPVTAHDFVYSWQR                         | 107 | 18 | 15 | 162.93 | b12y3y4y5y6y7y8y9y10y11y12y13y15°y15y18                                                         | 2151.98 | 72.201 | 108938 | 3 | 718.00  | -5.33  |
| [P06202]OPPA_SALTY Periplasmic oligopeptide-binding protein; | 5  |                      | SGEIDMTYNNMPIELFQK                         | 263 | 18 | 12 | 77.57  | b2b3b11b15y2y3y4y5y9y11y14y18                                                                   | 2130.00 | 86.336 | 89886  | 2 | 1065.51 | 7.22   |
| [P06202]OPPA_SALTY Periplasmic oligopeptide-binding protein; | 6  | Carbamidomethyl+C(4) | AGWCADYNEPTSFLNTMLSDSSN<br>NTAHYK          | 439 | 29 | 15 | 99.15  | b4y2y3y4y6°y6y7y8y9y10°y10y11y13y20y29                                                          | 3294.43 | 89.809 | 86702  | 3 | 1098.81 | 4.89   |
| [P06202]OPPA_SALTY Periplasmic oligopeptide-binding protein; | 7  |                      | ALDDHTFEVTLSEPVYFYK                        | 163 | 20 | 10 | 49.71  | b6b9b10°b10y5y7y9°y9y11y20                                                                      | 2371.14 | 85.833 | 86535  | 3 | 791.05  | -4.12  |
| [P06202]OPPA_SALTY Periplasmic oligopeptide-binding protein; | 8  |                      | TVINQVTYLPISSEVTDVNR                       | 241 | 20 | 29 | 166.13 | b2°b2b3b4b5°b5b8°b8°b8b9°b9y2°y2y3y4°y4y5°y5y6°y6y7y8°y8y11y12°y12y14y15y20                     | 2248.20 | 76.972 | 77903  | 2 | 1124.60 | 8.04   |
| [P06202]OPPA_SALTY Periplasmic oligopeptide-binding protein; | 9  |                      | NLGVNVNLENQEWK                             | 410 | 14 | 13 | 80.13  | b1°b1b2b3b10b11y1y7y8y10y11y12y14                                                               | 1656.84 | 66.611 | 76650  | 2 | 828.92  | 3.17   |
| [P06202]OPPA_SALTY Periplasmic oligopeptide-binding protein; | 10 |                      | NQGDLPAYSYTPPYTDGAK                        | 333 | 19 | 13 | 98.7   | b5b11°b11y3y5y6y8°y8y11y13y14y16y19                                                             | 2057.96 | 58.990 | 71961  | 2 | 1029.49 | 9.49   |
| [P06202]OPPA_SALTY Periplasmic oligopeptide-binding protein; | 11 |                      | HQGTFDVAR                                  | 430 | 9  | 6  | 61.68  | b5y3y4y5y6°y6                                                                                   | 1030.50 | 32.501 | 61395  | 2 | 515.75  | -9.24  |
| [P06202]OPPA_SALTY Periplasmic oligopeptide-binding protein; | 12 |                      | LADPNTASPYASYLQYGHIANIDD<br>IIAGK          | 125 | 29 | 7  | 25.98  | b3b12b13b15y1y3y29                                                                              | 3091.55 | 88.031 | 27832  | 3 | 1031.19 | 4.26   |
| [P06202]OPPA_SALTY Periplasmic oligopeptide-binding protein; | 13 |                      | NPQYWDNAK                                  | 232 | 9  | 4  | 30.48  | b8y3y6°y6                                                                                       | 1135.51 | 39.388 | 44318  | 2 | 568.26  | -3.23  |
| [P06202]OPPA_SALTY Periplasmic oligopeptide-binding protein; | 14 |                      | NWVVNER                                    | 220 | 7  | 3  | 37.45  | b4b5y3                                                                                          | 916.46  | 43.536 | 42021  | 2 | 458.73  | -5.53  |
| [P06202]OPPA_SALTY Periplasmic oligopeptide-binding protein; | 15 |                      | TFLDTR                                     | 424 | 6  | 1  | 13.62  | b4                                                                                              | 752.39  | 43.704 | 18746  | 1 | 752.39  | -3.41  |
| [P06202]OPPA_SALTY Periplasmic oligopeptide-binding protein; | 16 |                      | NNGSEVQSLDPHK                              | 43  | 13 | 5  | 41.33  | b4b6y4y7y8                                                                                      | 1424.68 | 92.360 | 3666   | 2 | 712.84  | 2.48   |
| [P06202]OPPA_SALTY Periplasmic oligopeptide-binding protein; | 17 |                      | DLFEGLLISDVEGHPSPGVAEK                     | 67  | 22 | 3  | 13.43  | b7y6y11                                                                                         | 2309.12 | 69.832 | 3225   | 3 | 770.38  | -21.25 |

|                                                             |    |                       |                               |     |    |    |        |                                                                                                                                |         |         |        |   |         |        |
|-------------------------------------------------------------|----|-----------------------|-------------------------------|-----|----|----|--------|--------------------------------------------------------------------------------------------------------------------------------|---------|---------|--------|---|---------|--------|
| P06202 OPPA_SALTY Periplasmic oligopeptide-binding protein; | 18 | Carbamidomethyl+C(6)  | VDPYLCTYYYEINNQK              | 291 | 16 | 8  | 35.43  | b3b6°b6y6*y6y9*y9y10                                                                                                           | 2082.98 | 116.916 | 2902   | 3 | 695.00  | 15.59  |
| P06202 OPPA_SALTY Periplasmic oligopeptide-binding protein; | 19 |                       | TVINQVTYLPISSEVTDVNRYS        | 241 | 22 | 12 | 116.79 | y5*y5y9y13*y13y14y15y16y17y18y19y20                                                                                            | 2567.34 | 76.857  | 110357 | 3 | 856.45  | -2.47  |
| P06202 OPPA_SALTY Periplasmic oligopeptide-binding protein; | 20 |                       | FGDKWTQPANIVTNGAYK            | 200 | 18 | 3  | 15.58  | b16y3y7                                                                                                                        | 2009.99 | 63.133  | 45172  | 3 | 670.67  | -7.41  |
| P06202 OPPA_SALTY Periplasmic oligopeptide-binding protein; | 21 |                       | VADDTQRSELYAK                 | 481 | 13 | 3  | 20.63  | b10y3y11                                                                                                                       | 1495.72 | 30.574  | 38305  | 3 | 499.24  | -14.12 |
| P06202 OPPA_SALTY Periplasmic oligopeptide-binding protein; | 22 | Carbamidomethyl+C(13) | EIPNEVRVDPYLCTYYYEINNQK       | 284 | 23 | 4  | 13.04  | b13°b13y12y21                                                                                                                  | 2920.39 | 75.979  | 31037  | 3 | 974.14  | 3.43   |
| P06202 OPPA_SALTY Periplasmic oligopeptide-binding protein; | 23 | Carbamidomethyl+C(6)  | VDPYLCTYYYEINNQKAPFNDVR       | 291 | 23 | 4  | 35.56  | b9y3y4y5                                                                                                                       | 2882.36 | 76.163  | 21449  | 3 | 961.46  | 4.49   |
| P06202 OPPA_SALTY Periplasmic oligopeptide-binding protein; | 24 |                       | VKNQGDLPAYSYPPTYDGAK          | 331 | 21 | 6  | 61.77  | y7y8°y8y9y10y11                                                                                                                | 2285.10 | 54.942  | 19313  | 3 | 762.37  | -2.56  |
| P06202 OPPA_SALTY Periplasmic oligopeptide-binding protein; | 25 |                       | NLGVNVNLENQEWKTFDTR           | 410 | 20 | 5  | 22.61  | b4b11b13°b13y9                                                                                                                 | 2390.20 | 84.768  | 18151  | 3 | 797.41  | -2.86  |
| P06202 OPPA_SALTY Periplasmic oligopeptide-binding protein; | 26 |                       | NPQYWDNAKTVINQVTYLPISSEVTDVNR | 232 | 29 | 8  | 39.87  | b3y4y7*y7y10y11y12°y12                                                                                                         | 3364.70 | 101.587 | 15676  | 3 | 1122.24 | 6.53   |
| P06202 OPPA_SALTY Periplasmic oligopeptide-binding protein; | 27 |                       | IVLERNPQYWDNAK                | 227 | 14 | 3  | 27.85  | y3y5y9                                                                                                                         | 1745.92 | 87.818  | 9665   | 2 | 873.46  | 11.40  |
| P06202 OPPA_SALTY Periplasmic oligopeptide-binding protein; | 28 |                       | DLFEGLLISDVEGHSPGVAEKWENK     | 67  | 26 | 3  | 12.14  | b4y7y14                                                                                                                        | 2866.45 | 99.303  | 4643   | 3 | 956.15  | 8.26   |
| P06202 OPPA_SALTY Periplasmic oligopeptide-binding protein; | 29 |                       | NNGSEVQSLDPHKIEGVPESNVSR      | 43  | 24 | 3  | 12.7   | b4b14y8                                                                                                                        | 2592.27 | 116.992 | 3917   | 3 | 864.76  | 0.09   |
| P06202 OPPA_SALTY Periplasmic oligopeptide-binding protein; | 30 |                       | ASYLQYGHIANIDDIAGKKPATDLGVK   | 135 | 28 | 4  | 36.82  | b3b6b7b8                                                                                                                       | 2971.63 | 82.897  | 3395   | 4 | 743.66  | 14.71  |
| P06202 OPPA_SALTY Periplasmic oligopeptide-binding protein; | 31 |                       | LADPNTASPYASYLQYGHIANIDDIAG   | 125 | 28 | 0  | 13.35  |                                                                                                                                | 2963.44 | 82.916  | 1952   | 2 | 1482.22 | -0.82  |
| P06202 OPPA_SALTY Periplasmic oligopeptide-binding protein; | 32 |                       | HQGTFDVAR                     | 430 | 9  | 0  | 1.62   |                                                                                                                                | 1013.47 | 32.535  | 6982   | 2 | 507.24  | -9.46  |
| P0A1P0 G3P1_SALTY Glyceraldehyde-3-phohate dehydrogenase;   | 1  |                       | VINDNFGIIEGLMTTVHATTATQK      | 160 | 24 | 44 | 296.9  | b2b3*b3b4°b4*b4b5*b5b6°b6*b6b7°b7*b7y1y3y4y5y6y7°y7*y7y8y9y10y11*y11y14*y14y15°y15*y15y16°y16*y16y17y18y19y20y22°y22y23y24*y24 | 2574.32 | 97.615  | 502605 | 3 | 858.78  | -0.57  |
| P0A1P0 G3P1_SALTY Glyceraldehyde-3-phohate dehydrogenase;   | 2  |                       | AGIALNDNFVK                   | 296 | 11 | 17 | 115.36 | b3b4b5y1y2y3y4*y4y5°y5*y5y6*y6y7*y7y8y11                                                                                       | 1161.62 | 61.253  | 218910 | 2 | 581.31  | -7.15  |
| P0A1P0 G3P1_SALTY Glyceraldehyde-3-phohate dehydrogenase;   | 3  |                       | LVSWYDNETGYSNK                | 307 | 14 | 13 | 123.46 | b3b6b7b11y3y5y6y9y10y11y12*y12y14                                                                                              | 1675.76 | 58.134  | 164628 | 2 | 838.39  | 2.33   |

|                                                            |    |                                                      |                                      |     |    |    |        |                                                                                                                 |         |         |        |   |         |        |
|------------------------------------------------------------|----|------------------------------------------------------|--------------------------------------|-----|----|----|--------|-----------------------------------------------------------------------------------------------------------------|---------|---------|--------|---|---------|--------|
| [P0A1P0]G3P1_SALTY Glyceraldehyde-3-phohate dehydrogenase; | 4  |                                                      | GASQNIIPSSTGAAK                      | 198 | 15 | 23 | 168.29 | b3b6°b6*b6b7°b7*b7b8b1<br>1b15y2y3y4y5y6y7°y7y8y9<br>y10y11*y11y15                                              | 1401.72 | 40.849  | 157800 | 2 | 701.37  | -7.58  |
| [P0A1P0]G3P1_SALTY Glyceraldehyde-3-phohate dehydrogenase; | 5  |                                                      | AATYEQIK                             | 249 | 8  | 7  | 49.31  | b5b8y4°y4y5y6y8                                                                                                 | 923.47  | 30.833  | 107351 | 2 | 462.24  | -11.43 |
| [P0A1P0]G3P1_SALTY Glyceraldehyde-3-phohate dehydrogenase; | 6  |                                                      | VLDLIAHISK                           | 321 | 10 | 8  | 88.52  | b3b4y2y3y4y5y6y8                                                                                                | 1108.66 | 65.065  | 106007 | 2 | 554.83  | -9.25  |
| [P0A1P0]G3P1_SALTY Glyceraldehyde-3-phohate dehydrogenase; | 7  |                                                      | SDIEIVAINDLLDAEYMAYMLK               | 24  | 22 | 15 | 133.93 | b3°b3b4b5b6b7y4y5y7y8y<br>9y10y11°y11y22                                                                        | 2530.24 | 125.851 | 76228  | 3 | 844.08  | -2.22  |
| [P0A1P0]G3P1_SALTY Glyceraldehyde-3-phohate dehydrogenase; | 8  |                                                      | VPTPNVSVVDLTVR                       | 232 | 14 | 5  | 38.73  | y5y8y11y12y14                                                                                                   | 1495.85 | 70.778  | 52516  | 2 | 748.43  | 0.16   |
| [P0A1P0]G3P1_SALTY Glyceraldehyde-3-phohate dehydrogenase; | 9  |                                                      | VLPELNGK                             | 217 | 8  | 8  | 54.08  | b2y3y4y5°y5y6°y6y8                                                                                              | 869.50  | 44.749  | 41714  | 2 | 435.25  | -13.83 |
| [P0A1P0]G3P1_SALTY Glyceraldehyde-3-phohate dehydrogenase; | 10 |                                                      | TVDGPSHKDWR                          | 184 | 11 | 8  | 41.32  | b8b9°b9y2y7°y7y8y11                                                                                             | 1297.62 | 28.070  | 18460  | 2 | 649.32  | -3.29  |
| [P0A1P0]G3P1_SALTY Glyceraldehyde-3-phohate dehydrogenase; | 11 |                                                      | VGINGFGR                             | 4   | 8  | 7  | 51.07  | b2b5b7y6*y6y7y8                                                                                                 | 819.45  | 41.961  | 14137  | 2 | 410.23  | 2.76   |
| [P0A1P0]G3P1_SALTY Glyceraldehyde-3-phohate dehydrogenase; | 12 |                                                      | WDEVGVDVVAEATGIFLTDETAR              | 84  | 23 | 6  | 17.48  | b8b13°b13y10y13°y13                                                                                             | 2493.19 | 69.043  | 3397   | 4 | 624.05  | -9.01  |
| [P0A1P0]G3P1_SALTY Glyceraldehyde-3-phohate dehydrogenase; | 13 |                                                      | DNTPMFVK                             | 124 | 8  | 3  | 33.08  | b6y4y5                                                                                                          | 951.47  | 48.327  | 3002   | 1 | 951.47  | 10.46  |
| [P0A1P0]G3P1_SALTY Glyceraldehyde-3-phohate dehydrogenase; | 14 |                                                      | GANFDK                               | 132 | 6  | 1  | 13.62  | y4                                                                                                              | 651.31  | 52.260  | 2985   | 1 | 651.31  | 7.50   |
| [P0A1P0]G3P1_SALTY Glyceraldehyde-3-phohate dehydrogenase; | 15 |                                                      | AAAEGEMK                             | 261 | 8  | 3  | 36.09  | b4y4y6                                                                                                          | 806.38  | 112.198 | 1759   | 1 | 806.38  | 6.81   |
| [P0A1P0]G3P1_SALTY Glyceraldehyde-3-phohate dehydrogenase; | 16 | Carbamidomethyl+C(18)<br>;Carbamidomethyl+C(22)<br>) | GANFDKYEGQDIVSNASCTTNCL<br>APLAK     | 132 | 28 | 32 | 246.11 | b4b5b7b8b10*b10b11*b11<br>b12°b12*b12b13b16b22b2<br>4*b24b27y3y4y5y6y8y10y<br>11y12°y12*y12y13y14y15<br>*y15y16 | 3044.41 | 66.489  | 234802 | 3 | 1015.47 | 0.24   |
| [P0A1P0]G3P1_SALTY Glyceraldehyde-3-phohate dehydrogenase; | 17 |                                                      | TVDGPSHKDWR                          | 184 | 11 | 3  | 27.31  | b3y7y8                                                                                                          | 1297.63 | 27.055  | 8921   | 2 | 649.32  | -2.54  |
| [P0A1P0]G3P1_SALTY Glyceraldehyde-3-phohate dehydrogenase; | 18 |                                                      | KHITAGAK                             | 107 | 8  | 5  | 57.09  | b3y3y5°y5y7                                                                                                     | 825.49  | 12.583  | 7512   | 2 | 413.25  | -10.13 |
| [P0A1P0]G3P1_SALTY Glyceraldehyde-3-phohate dehydrogenase; | 19 |                                                      | DNTPMFVKGANFDK                       | 124 | 14 | 4  | 19.28  | b10b13y12*y12                                                                                                   | 1583.75 | 136.800 | 7108   | 1 | 1583.75 | 1.62   |
| [P0A1P0]G3P1_SALTY Glyceraldehyde-3-phohate dehydrogenase; | 20 |                                                      | SDIEIVAINDLLDAEYMAYMLKYD<br>STHGR    | 24  | 29 | 5  | 16.9   | b4b6b15y11°y11                                                                                                  | 3346.60 | 81.973  | 4682   | 3 | 1116.20 | -0.07  |
| [P0A1P0]G3P1_SALTY Glyceraldehyde-3-phohate dehydrogenase; | 21 |                                                      | VINDNFGIIEGLMTTVHATTATQK<br>TVDGPSHK | 160 | 32 | 3  | 11.14  | b5y5y8                                                                                                          | 3395.74 | 119.139 | 2907   | 3 | 1132.59 | 4.96   |

|                                                            |    |               |                               |     |    |    |        |                                                        |         |         |       |   |         |        |
|------------------------------------------------------------|----|---------------|-------------------------------|-----|----|----|--------|--------------------------------------------------------|---------|---------|-------|---|---------|--------|
| P0A1P0 G3P1_SALTY Glyceraldehyde-3-phohate dehydrogenase;  | 22 |               | AAVKAAAE GEMK                 | 257 | 12 | 3  | 22.27  | b4y7y9                                                 | 1175.60 | 82.947  | 2568  | 2 | 588.30  | -6.33  |
| P0A1P0 G3P1_SALTY Glyceraldehyde-3-phohate dehydrogenase;  | 23 | Oxidation+M() | SDIEIVAINDLLAEY MAYMLK        | 24  | 22 | 3  | 13.43  | b5y8y13                                                | 2546.23 | 121.116 | 2651  | 3 | 849.42  | -2.49  |
| P0A1P0 G3P1_SALTY Glyceraldehyde-3-phohate dehydrogenase;  | 24 |               | DLIAHISK                      | 323 | 8  | 1  | 8.25   | b6                                                     | 896.51  | 65.062  | 32519 | 2 | 448.76  | -14.09 |
| P0A1P0 G3P1_SALTY Glyceraldehyde-3-phohate dehydrogenase;  | 25 |               | LDLIAHISK                     | 322 | 9  | 1  | 8.25   | b6                                                     | 1009.59 | 65.070  | 32054 | 2 | 505.30  | -11.43 |
| P0A1P0 G3P1_SALTY Glyceraldehyde-3-phohate dehydrogenase;  | 26 |               | LNDNFVK                       | 300 | 7  | 2  | 21.87  | b3b4                                                   | 849.44  | 61.208  | 7203  | 1 | 849.44  | -9.99  |
| P0A1P0 G3P1_SALTY Glyceraldehyde-3-phohate dehydrogenase;  | 27 |               | AATYEQIK                      | 249 | 8  | 0  | 1.21   |                                                        | 905.46  | 30.813  | 37803 | 2 | 453.23  | -6.74  |
| P23905 DGAL_SALTY D-galactose-binding periplasmic protein; | 1  |               | SSIPVFGVDALPEALALVK           | 250 | 19 | 20 | 172.71 | b4°b4b6°b6b9y1y2y3y4y6y8y9y10y11y12y13y14y15y16y19     | 1926.10 | 107.465 | 91307 | 2 | 963.55  | 3.04   |
| P23905 DGAL_SALTY D-galactose-binding periplasmic protein; | 2  |               | ALAINLVDPAAGTVIEK             | 84  | 18 | 15 | 87.19  | b2b3b4b5°b5b6y2°y2y3y6y10y11°y11y14y18                 | 1766.01 | 80.255  | 73088 | 2 | 883.51  | 3.87   |
| P23905 DGAL_SALTY D-galactose-binding periplasmic protein; | 3  |               | SGAMAGTVLNDANNQAK             | 269 | 17 | 21 | 117.69 | b2°b2b3b4b9b17y1y2y4*y4y5y6y8y9*y9y10y11y12°y12*y12y17 | 1661.80 | 46.111  | 68069 | 2 | 831.40  | 3.67   |
| P23905 DGAL_SALTY D-galactose-binding periplasmic protein; | 4  |               | VPYVGVDKDNLSFTQK              | 315 | 17 | 7  | 43.82  | b3b12b13y4y6y13y17                                     | 1938.96 | 61.485  | 33214 | 3 | 646.99  | -8.37  |
| P23905 DGAL_SALTY D-galactose-binding periplasmic protein; | 5  |               | MDAWLSGPNANK                  | 214 | 12 | 5  | 44.91  | y3y9y10*y10y11                                         | 1303.60 | 49.332  | 19094 | 2 | 652.31  | -5.43  |
| P23905 DGAL_SALTY D-galactose-binding periplasmic protein; | 6  |               | GIQTEQLALDTAMWDTAQAKDK        | 192 | 22 | 6  | 29.74  | b3b8b11°b11°b11b13                                     | 2434.22 | 63.239  | 18712 | 4 | 609.31  | 10.43  |
| P23905 DGAL_SALTY D-galactose-binding periplasmic protein; | 7  |               | ESGVIQGDLIAK                  | 136 | 12 | 5  | 34.24  | b7°b7y3y6y7                                            | 1229.66 | 53.666  | 8507  | 2 | 615.34  | -7.94  |
| P23905 DGAL_SALTY D-galactose-binding periplasmic protein; | 8  |               | HWQANQGWDLNK                  | 148 | 12 | 4  | 37.25  | b4y7y9y11                                              | 1496.72 | 62.486  | 2267  | 3 | 499.58  | 8.97   |
| P23905 DGAL_SALTY D-galactose-binding periplasmic protein; | 9  |               | GIQTEQLALDTAMWDTAQAK          | 192 | 20 | 6  | 25.24  | b7°b7b11b12°b12y4                                      | 2191.12 | 84.712  | 5997  | 3 | 731.04  | 20.95  |
| P23905 DGAL_SALTY D-galactose-binding periplasmic protein; | 10 |               | NLAEGK                        | 293 | 6  | 2  | 26.84  | b5y3                                                   | 631.33  | 46.713  | 5529  | 1 | 631.33  | -10.05 |
| P23905 DGAL_SALTY D-galactose-binding periplasmic protein; | 11 |               | GEPGHPDAEAR                   | 170 | 11 | 6  | 38.31  | b3b5y6°y6y7°y7                                         | 1135.50 | 98.406  | 2614  | 1 | 1135.50 | -9.03  |
| P23905 DGAL_SALTY D-galactose-binding periplasmic protein; | 12 |               | SAPDVQLLMNDSQNDQSKQNDQIDVLLAK | 52  | 29 | 3  | 21.94  | b9b10y15                                               | 3227.57 | 93.588  | 60456 | 3 | 1076.53 | -3.40  |
| P23905 DGAL_SALTY D-galactose-binding periplasmic protein; | 13 |               | ATFDLAKNLAEGK                 | 286 | 13 | 4  | 39.2   | b5b6y4y5                                               | 1377.74 | 72.772  | 18848 | 2 | 689.37  | -1.59  |

|                                                            |    |                       |                                          |     |    |    |        |                                                                                                  |         |        |        |   |         |        |
|------------------------------------------------------------|----|-----------------------|------------------------------------------|-----|----|----|--------|--------------------------------------------------------------------------------------------------|---------|--------|--------|---|---------|--------|
| P23905 DGAL_SALTY D-galactose-binding periplasmic protein; | 14 |                       | IGVTIYKYDDNFMSVVR                        | 27  | 17 | 3  | 16.31  | b12y8y12                                                                                         | 2020.00 | 77.796 | 16835  | 3 | 674.01  | -9.13  |
| P23905 DGAL_SALTY D-galactose-binding periplasmic protein; | 15 |                       | GAADGTSWKIENK                            | 299 | 13 | 5  | 49.11  | b3b5b8b12*b12                                                                                    | 1376.66 | 54.100 | 12061  | 3 | 459.56  | -12.50 |
| P23905 DGAL_SALTY D-galactose-binding periplasmic protein; | 16 |                       | ESGVIQGDLIAKHWQANQGWDL<br>NK             | 136 | 24 | 3  | 19.01  | b3b5b11                                                                                          | 2707.38 | 72.746 | 7337   | 5 | 542.28  | 9.56   |
| P23905 DGAL_SALTY D-galactose-binding periplasmic protein; | 17 |                       | SGAMAGTVLNDANNQAKATFDL<br>AK             | 269 | 24 | 4  | 19.01  | b3°b3b6b10                                                                                       | 2408.17 | 57.714 | 5415   | 2 | 1204.59 | -5.47  |
| P23905 DGAL_SALTY D-galactose-binding periplasmic protein; | 18 |                       | SSIPVFGVDALPEALALVKSGAMA<br>GTVLNDANNQAK | 250 | 36 | 5  | 10.89  | b10b13°b13y3*y3                                                                                  | 3568.82 | 73.731 | 5345   | 4 | 892.96  | -13.34 |
| P23905 DGAL_SALTY D-galactose-binding periplasmic protein; | 19 |                       | DGKSAPDVQLLMNDSQNDQSK                    | 49  | 21 | 3  | 22.32  | b6y3y4                                                                                           | 2290.04 | 58.923 | 4154   | 3 | 764.02  | -11.30 |
| P23905 DGAL_SALTY D-galactose-binding periplasmic protein; | 20 |                       | GEPGHPDAEARTTYVVK                        | 170 | 17 | 4  | 16.31  | b3°b3b6y11                                                                                       | 1826.91 | 80.298 | 2462   | 3 | 609.64  | 3.01   |
| P23905 DGAL_SALTY D-galactose-binding periplasmic protein; | 21 |                       | NLAEGKGAADGTSWK                          | 293 | 15 | 5  | 37.88  | b9y4y5°y5y6                                                                                      | 1504.73 | 63.310 | 2321   | 2 | 752.87  | -2.84  |
| P23905 DGAL_SALTY D-galactose-binding periplasmic protein; | 22 |                       | ELNDKGIQTEQLALDTAMWDTAQ<br>AK            | 187 | 25 | 3  | 18.62  | y6y8y13                                                                                          | 2790.39 | 79.803 | 1675   | 2 | 1395.70 | 8.84   |
| P23905 DGAL_SALTY D-galactose-binding periplasmic protein; | 23 | Oxidation+M(4)        | SGAMAGTVLNDANNQAK                        | 269 | 17 | 4  | 16.31  | b3°b3b9y3                                                                                        | 1677.80 | 44.892 | 13802  | 3 | 559.94  | 10.11  |
| P23905 DGAL_SALTY D-galactose-binding periplasmic protein; | 24 | Oxidation+M(8)        | VLTL SAVMASLLFGAHAHAADTR                 | 4   | 23 | 3  | 23.13  | y6y7y11                                                                                          | 2368.23 | 78.306 | 11487  | 3 | 790.08  | -7.22  |
| P64076 ENO_SALTY Enolase;                                  | 1  |                       | FNQIGSLTETLAAIK                          | 342 | 15 | 27 | 217.94 | b2*b2b3*b3b4*b4b5b6b9b<br>12*b12b13b14*b14b15y1y<br>2y3y4y5y6y7y8y9y11y12y<br>15                 | 1605.88 | 85.415 | 246537 | 2 | 803.44  | -3.50  |
| P64076 ENO_SALTY Enolase;                                  | 2  |                       | SGETEDATIADLAVGTAAGQIK                   | 371 | 22 | 32 | 247.62 | b2b3b4b7b9°b9b10b11b12<br>°b12b13b14°b14b16b22y1<br>y2y3y4y5*y5y6y7y8*y8y9y<br>12y13y14y16y17y22 | 2118.07 | 75.168 | 222048 | 2 | 1059.54 | 6.34   |
| P64076 ENO_SALTY Enolase;                                  | 3  |                       | GMNTAVGDEGGYAPNLGSNAEA<br>LAVIAEAVK      | 200 | 31 | 22 | 149.87 | b2b3b4b5°b5b6°b6°b6b8b<br>13y2y3y4y5y6y7y8y14y15<br>y16y18y31                                    | 2989.47 | 94.703 | 125308 | 3 | 997.16  | 2.94   |
| P64076 ENO_SALTY Enolase;                                  | 4  |                       | DAGYTAVISHR                              | 360 | 11 | 15 | 111.38 | b2b3b10y1y2y3°y3y4y5y6y<br>7y8y9°y9y11                                                           | 1189.59 | 41.322 | 88605  | 2 | 595.30  | -4.52  |
| P64076 ENO_SALTY Enolase;                                  | 5  |                       | GIANSILIK                                | 333 | 9  | 7  | 45.46  | b2b5y1y3y6y7y9                                                                                   | 928.57  | 60.464 | 81566  | 2 | 464.79  | -12.16 |
| P64076 ENO_SALTY Enolase;                                  | 6  |                       | YSMPVPMMNIIINGGEHADNNVDI<br>QEFMIQPVGAK  | 143 | 34 | 9  | 23.51  | b2°b2b5b23y5y7y29y31y3<br>4                                                                      | 3759.79 | 98.064 | 77432  | 3 | 1253.94 | 8.12   |
| P64076 ENO_SALTY Enolase;                                  | 7  | Carbamidomethyl+C(16) | AAGYELGKDITLAMDCAASEFYK<br>DGK           | 231 | 26 | 10 | 69.66  | b3b4b5b7°b7b9b10b11y7°<br>y7                                                                     | 2824.29 | 98.418 | 58038  | 4 | 706.83  | -10.03 |
| P64076 ENO_SALTY Enolase;                                  | 8  |                       | GMPLYEHIAELNGTPGK                        | 126 | 17 | 5  | 16.31  | b2b10y2y3y5                                                                                      | 1826.89 | 66.959 | 51916  | 3 | 609.64  | -8.82  |
| P64076 ENO_SALTY Enolase;                                  | 9  |                       | IQLVGDDLFTVNTNK                          | 311 | 14 | 9  | 42.4   | b2*b2b4y2y4y9y11y12y14                                                                           | 1562.85 | 77.402 | 35786  | 2 | 781.93  | 3.75   |
| P64076 ENO_SALTY Enolase;                                  | 10 |                       | IEEALGEK                                 | 411 | 8  | 6  | 33.08  | b1b5y6°y6y7y8                                                                                    | 888.46  | 31.077 | 22193  | 2 | 444.73  | -6.32  |
| P64076 ENO_SALTY Enolase;                                  | 11 |                       | AVGAVNGPIAQAILGK                         | 66  | 16 | 5  | 37.87  | b5y5y10y11y14                                                                                    | 1478.87 | 74.944 | 74627  | 2 | 739.94  | 0.33   |
| P64076 ENO_SALTY Enolase;                                  | 12 |                       | QYPIVSIEDGLDESDWDGFAYQTK                 | 282 | 24 | 4  | 12.7   | b9y6*y6y14                                                                                       | 2776.30 | 93.397 | 21581  | 2 | 1388.65 | 11.87  |



|                                                             |    |                      |                                                            |     |    |    |        |                                                                    |         |         |        |   |         |        |
|-------------------------------------------------------------|----|----------------------|------------------------------------------------------------|-----|----|----|--------|--------------------------------------------------------------------|---------|---------|--------|---|---------|--------|
| P64076 ENO_SALTY Enolase;                                   | 13 |                      | EALELR                                                     | 46  | 6  | 1  | 13.62  | y4                                                                 | 730.41  | 30.561  | 18402  | 1 | 730.41  | -3.76  |
| P64076 ENO_SALTY Enolase;                                   | 14 |                      | GNPTVEAEVHLEGGFVGVMAAAPS<br>GASTGSR                        | 16  | 30 | 4  | 22.72  | y7y8y14°y14                                                        | 2856.36 | 61.541  | 9390   | 4 | 714.85  | 1.97   |
| P64076 ENO_SALTY Enolase;                                   | 15 |                      | SNFGANAILAVSLANAK                                          | 103 | 17 | 4  | 33.71  | b3b4b11b16                                                         | 1660.88 | 77.116  | 7805   | 2 | 830.95  | -11.25 |
| P64076 ENO_SALTY Enolase;                                   | 16 |                      | GMPLYEHIAELNGTPGKYSMPP<br>MMNIINGGEHADNNVDIQEFMIQP<br>VGAK | 126 | 51 | 6  | 17.15  | b4b14°b14b22b26y3                                                  | 5567.62 | 97.800  | 106281 | 5 | 1114.33 | -6.49  |
| P64076 ENO_SALTY Enolase;                                   | 17 |                      | VLGDKIQLVGDDLFVNTNK                                        | 306 | 19 | 9  | 52.21  | y4y5y6°y6*y6y10*y10y11°<br>y11                                     | 2075.12 | 79.474  | 102249 | 3 | 692.38  | -7.18  |
| P64076 ENO_SALTY Enolase;                                   | 18 |                      | DGKYVLAGEGK                                                | 254 | 12 | 5  | 32.18  | b5b11y3y9°y9                                                       | 1250.63 | 43.537  | 81640  | 2 | 625.82  | -8.78  |
| P64076 ENO_SALTY Enolase;                                   | 19 |                      | GKGMNTAVGDEGGYAPNLGSNA<br>EALAVIAEAVK                      | 198 | 33 | 4  | 13.29  | b9b16y3y5                                                          | 3174.58 | 89.596  | 37623  | 3 | 1058.87 | 3.46   |
| P64076 ENO_SALTY Enolase;                                   | 20 |                      | AAAAAKGMPLYEHIAELNGTPGK                                    | 120 | 23 | 3  | 13.04  | b11b13y13                                                          | 2310.22 | 75.232  | 15427  | 3 | 770.74  | 12.26  |
| P64076 ENO_SALTY Enolase;                                   | 21 |                      | IEEALGEKAPYNGR                                             | 411 | 14 | 3  | 27.06  | y5y6y9                                                             | 1546.77 | 39.575  | 8095   | 3 | 516.26  | -10.65 |
| P64076 ENO_SALTY Enolase;                                   | 22 |                      | DQAGIDKIMIDLDTENK                                          | 85  | 18 | 3  | 24.5   | y6y7y9                                                             | 1975.99 | 70.531  | 1806   | 2 | 988.50  | 11.18  |
| P64076 ENO_SALTY Enolase;                                   | 23 | Oxidation+M(2)       | GMPLYEHIAELNGTPGK                                          | 126 | 17 | 3  | 34.51  | y6y7y8                                                             | 1842.91 | 36.329  | 2945   | 3 | 614.97  | 0.13   |
| P64076 ENO_SALTY Enolase;                                   | 24 |                      | GYTAVISHR                                                  | 362 | 9  | 2  | 7.86   | b3°b3                                                              | 1003.53 | 41.354  | 36920  | 2 | 502.27  | -2.86  |
| P64076 ENO_SALTY Enolase;                                   | 25 |                      | ANSILK                                                     | 335 | 7  | 2  | 8.81   | b4°b4                                                              | 758.47  | 60.463  | 15127  | 1 | 758.47  | -5.23  |
| P64076 ENO_SALTY Enolase;                                   | 26 |                      | AGYTAVISHR                                                 | 361 | 10 | 0  | 2.43   |                                                                    | 1074.57 | 41.291  | 13716  | 2 | 537.79  | 5.00   |
| P64076 ENO_SALTY Enolase;                                   | 27 |                      | YSMPVPMMNINGGEHA                                           | 143 | 17 | 0  | 11.73  |                                                                    | 1860.84 | 98.010  | 6423   | 3 | 620.95  | -1.31  |
| P64076 ENO_SALTY Enolase;                                   | 28 |                      | DAGYTAVISHR                                                | 360 | 11 | 1  | 7.86   | b4                                                                 | 1171.58 | 41.293  | 1579   | 3 | 391.20  | -1.35  |
| P02910 HISJ_SALTY Histidine-binding<br>periplasmic protein; | 1  |                      | VGVLQGTQTETFGNEHWAPK                                       | 135 | 20 | 22 | 133.4  | b1b2b3b4b14y1y2y3y7°y7<br>*y7y8y9y10y11°y11y15y16<br>*y16y17y19y20 | 2199.08 | 63.240  | 237580 | 3 | 733.70  | -3.00  |
| P02910 HISJ_SALTY Histidine-binding<br>periplasmic protein; | 2  |                      | IGTDPTYAPFESK                                              | 29  | 13 | 20 | 153.39 | b2b3b4°b4y1y2y3°y3y4y5°<br>y5y6°y6y7y8y9y10y11y12y<br>13           | 1425.69 | 55.320  | 126593 | 2 | 713.35  | -2.65  |
| P02910 HISJ_SALTY Histidine-binding<br>periplasmic protein; | 3  |                      | NSDIQPTVASLK                                               | 120 | 12 | 17 | 111.78 | b2°b2b3°b3°b3b4°b4b5y3<br>y4y8°y8*y8y9y10y11y12                    | 1272.67 | 48.101  | 102352 | 2 | 636.84  | -6.43  |
| P02910 HISJ_SALTY Histidine-binding<br>periplasmic protein; | 4  | Carbamidomethyl+C(5) | INTQCTFVENPLDALIPSLK                                       | 62  | 20 | 21 | 122.21 | b3°b3b9b10°b10b14b16°b1<br>6°b16y1y2y4°y4y5y6y7y8y<br>10y12y15y20  | 2273.20 | 103.498 | 94941  | 2 | 1137.10 | 7.84   |
| P02910 HISJ_SALTY Histidine-binding<br>periplasmic protein; | 5  |                      | FGGPAVKDEK                                                 | 201 | 10 | 6  | 36.9   | y3°y3y4y5°y5y10                                                    | 1047.54 | 26.721  | 32230  | 2 | 524.27  | -5.36  |
| P02910 HISJ_SALTY Histidine-binding<br>periplasmic protein; | 6  |                      | QQEIAFTDK                                                  | 99  | 9  | 5  | 45.46  | b5b6b8y1y4                                                         | 1079.54 | 42.778  | 13129  | 2 | 540.27  | -0.90  |
| P02910 HISJ_SALTY Histidine-binding<br>periplasmic protein; | 7  |                      | GIEIVSYQGQDNIYSDLTAGR                                      | 155 | 21 | 4  | 23.52  | y2y7y8y12                                                          | 2299.13 | 77.078  | 2004   | 4 | 575.54  | 2.12   |
| P02910 HISJ_SALTY Histidine-binding<br>periplasmic protein; | 8  |                      | EDNELR                                                     | 223 | 6  | 1  | 13.62  | y4                                                                 | 775.36  | 58.553  | 2717   | 1 | 775.36  | 7.01   |
| P02910 HISJ_SALTY Histidine-binding<br>periplasmic protein; | 9  | Carbamidomethyl+C(5) | INTQCTFVENPLDALIPSLKAK                                     | 62  | 22 | 4  | 13.43  | b4b9°b9y20                                                         | 2472.32 | 98.313  | 109610 | 3 | 824.78  | 0.20   |
| P02910 HISJ_SALTY Histidine-binding<br>periplasmic protein; | 10 |                      | IGTDPTYAPFESKNAQGLVGFDI<br>DLAK                            | 29  | 28 | 4  | 35.32  | b13b14y3y4                                                         | 2996.52 | 95.550  | 70741  | 3 | 999.51  | 9.94   |
| P02910 HISJ_SALTY Histidine-binding<br>periplasmic protein; | 11 | Carbamidomethyl+C(6) | RINTQCTFVENPLDALIPSLK                                      | 61  | 21 | 3  | 13.87  | b11y4y6                                                            | 2429.26 | 97.434  | 59998  | 3 | 810.43  | -8.94  |
| P02910 HISJ_SALTY Histidine-binding<br>periplasmic protein; | 12 |                      | IRIGTDPTYAPFESK                                            | 27  | 15 | 3  | 26.21  | y5y7y11                                                            | 1694.87 | 125.807 | 4541   | 2 | 847.94  | -2.23  |
| P02910 HISJ_SALTY Histidine-binding<br>periplasmic protein; | 13 |                      | GGPAVKDEK                                                  | 202 | 9  | 0  | 2.02   |                                                                    | 900.47  | 26.641  | 6277   | 2 | 450.74  | -12.00 |
| Q7CQ05 GRCA_SALTY Autonomous<br>glycyl radical cofactor;    | 1  |                      | MITGIQITK                                                  | 0   | 9  | 5  | 38.26  | y2y3y6y7y9                                                         | 1004.57 | 54.831  | 86304  | 2 | 502.79  | -11.12 |
| Q7CQ05 GRCA_SALTY Autonomous<br>glycyl radical cofactor;    | 2  |                      | SGFAEDEVVAVSK                                              | 35  | 13 | 12 | 83.41  | b3b4°b4b9y1y2y4y6y8y9y1<br>0y13                                    | 1337.65 | 54.188  | 84903  | 2 | 669.33  | -2.83  |

|                                                                  |    |                      |                            |     |    |    |        |                                                                             |         |         |        |   |        |        |
|------------------------------------------------------------------|----|----------------------|----------------------------|-----|----|----|--------|-----------------------------------------------------------------------------|---------|---------|--------|---|--------|--------|
| Q7CQ05 GRCA_SALTY Autonomous glycyI radical cofactor;            | 3  |                      | FNSLTPEQQRDVIAR            | 106 | 15 | 8  | 39.92  | b2*b2b3y3y4y6y13y15                                                         | 1773.90 | 47.386  | 68984  | 3 | 591.97 | -11.84 |
| Q7CQ05 GRCA_SALTY Autonomous glycyI radical cofactor;            | 4  |                      | LGEIEYR                    | 48  | 7  | 8  | 40.46  | b2b3y1y2y4°y4y6y7                                                           | 879.45  | 42.043  | 52949  | 2 | 440.23 | -8.81  |
| Q7CQ05 GRCA_SALTY Autonomous glycyI radical cofactor;            | 5  |                      | VEGGQHNLNVNVLr             | 66  | 13 | 8  | 78.94  | b10y3y4*y4y6y7y8y11                                                         | 1434.76 | 50.048  | 50261  | 3 | 478.93 | -13.10 |
| Q7CQ05 GRCA_SALTY Autonomous glycyI radical cofactor;            | 6  |                      | FNSLTPEQQR                 | 106 | 10 | 14 | 86.76  | b2*b2b3°b3b9°b9y3y5*y5y6y7y8°y8y10                                          | 1219.60 | 37.919  | 46813  | 2 | 610.31 | -3.10  |
| Q7CQ05 GRCA_SALTY Autonomous glycyI radical cofactor;            | 7  |                      | EIPMEVKPEVR                | 55  | 11 | 6  | 50.52  | y2y4y6y8y9y11                                                               | 1326.71 | 48.514  | 30408  | 2 | 663.86 | -2.39  |
| Q7CQ05 GRCA_SALTY Autonomous glycyI radical cofactor;            | 8  |                      | VSGYAVR                    | 99  | 7  | 5  | 37.45  | b3y2y5y6y7                                                                  | 751.40  | 26.972  | 10978  | 1 | 751.40 | -7.07  |
| Q7CQ05 GRCA_SALTY Autonomous glycyI radical cofactor;            | 9  |                      | AANDDLLNSFWLLDSEK          | 9   | 17 | 4  | 39.15  | b7b12b13b14                                                                 | 1950.93 | 98.757  | 5602   | 2 | 975.97 | -6.95  |
| Q7CQ05 GRCA_SALTY Autonomous glycyI radical cofactor;            | 10 |                      | AANDDLLNSFWLLDSEKGEAR      | 9   | 21 | 23 | 192.68 | b5°b5b6*b6b7°b7*b7y4y5y7y8y9y10°y10y11y12y13y14*y14y15y16y19*y19            | 2364.13 | 92.328  | 209821 | 3 | 788.72 | -5.47  |
| Q7CQ05 GRCA_SALTY Autonomous glycyI radical cofactor;            | 11 | Carbamidomethyl+C(1) | CIVAKSGFAEDVVAVSK          | 30  | 18 | 6  | 29.14  | b11°b11b12y11y13°y13                                                        | 1908.97 | 120.420 | 21597  | 2 | 954.99 | -4.54  |
| Q7CQ05 GRCA_SALTY Autonomous glycyI radical cofactor;            | 12 |                      | MITGIQITKAANDDLLNSFWLLDSEK | 0   | 26 | 3  | 22.81  | y5y12y13                                                                    | 2936.47 | 105.029 | 7658   | 3 | 979.50 | -11.47 |
| Q7CQ05 GRCA_SALTY Autonomous glycyI radical cofactor;            | 13 |                      | SGFAEDVVAVSKLGEIEYR        | 35  | 20 | 4  | 36.01  | b4b5y3y4                                                                    | 2198.10 | 97.619  | 5813   | 3 | 733.37 | 1.11   |
| Q7CQ05 GRCA_SALTY Autonomous glycyI radical cofactor;            | 14 |                      | ETLEDAVKHPEK               | 80  | 12 | 4  | 37.25  | b4b8b10y4                                                                   | 1395.70 | 76.215  | 3365   | 2 | 698.35 | -7.61  |
| Q7CQ05 GRCA_SALTY Autonomous glycyI radical cofactor;            | 15 |                      | VSGYAVRFNSLTPEQQR          | 99  | 17 | 3  | 16.31  | b14y5y9                                                                     | 1951.98 | 102.383 | 2549   | 3 | 651.33 | -8.69  |
| Q7CQ05 GRCA_SALTY Autonomous glycyI radical cofactor;            | 16 |                      | PMEVKPEVR                  | 57  | 9  | 2  | 21.87  | b3b4                                                                        | 1084.58 | 48.522  | 35038  | 2 | 542.79 | -6.42  |
| Q7CQ05 GRCA_SALTY Autonomous glycyI radical cofactor;            | 17 |                      | TGIQITK                    | 2   | 7  | 3  | 8.81   | b4°b4*b4                                                                    | 760.46  | 54.803  | 3939   | 1 | 760.46 | -1.44  |
| Q7CQ05 GRCA_SALTY Autonomous glycyI radical cofactor;            | 18 |                      | EIPMEVKPEVR                | 55  | 11 | 0  | 2.43   |                                                                             | 1308.68 | 48.524  | 10059  | 3 | 436.90 | -10.17 |
| P0AA28 THIO_SALTY Thioredoxin-1;                                 | 1  |                      | LNIDQNPGTAPK               | 58  | 12 | 30 | 198.08 | b2*b2b4*b4b5b6*b6b7*b7b9°b9b10y1y2y3y4y5y6°y6y7*y7y8°y8*y8y9°y9*y9y10y11y12 | 1267.65 | 38.475  | 114170 | 2 | 634.33 | -8.47  |
| P0AA28 THIO_SALTY Thioredoxin-1;                                 | 2  |                      | MIAPILDEIADEYQGK           | 37  | 16 | 10 | 62.96  | b2y2y3*y3y4y6y12y13y14y16                                                   | 1805.91 | 93.323  | 105256 | 2 | 903.46 | 8.11   |
| P0AA28 THIO_SALTY Thioredoxin-1;                                 | 3  |                      | GIPTLLLFK                  | 74  | 9  | 10 | 74.9   | b2b3y1y2y3y4y5y6y7y9                                                        | 1001.63 | 90.429  | 68183  | 2 | 501.32 | -11.39 |
| P0AA28 THIO_SALTY Thioredoxin-1;                                 | 4  |                      | VGALSK                     | 91  | 6  | 2  | 13.62  | b5°b5                                                                       | 574.35  | 38.378  | 14593  | 1 | 574.35 | -12.75 |
| P0AA28 THIO_SALTY Thioredoxin-1;                                 | 5  |                      | MIAPILDEIADEYQGKLTVAK      | 37  | 21 | 9  | 71.2   | b3b14y4y11y12y15y16y18y20                                                   | 2318.22 | 94.434  | 164562 | 3 | 773.41 | -3.58  |
| P0AA28 THIO_SALTY Thioredoxin-1;                                 | 6  | Oxidation+M(1)       | MIAPILDEIADEYQGK           | 37  | 16 | 3  | 17.15  | b4y10y14                                                                    | 1821.90 | 120.977 | 1857   | 2 | 911.46 | 5.23   |
| Q9ZF60 GLTI_SALTY Glutamate/aartate periplasmic-binding protein; | 1  |                      | VVGYSQDYSNAIVEAVKK         | 61  | 18 | 13 | 113.28 | b2b11y2y4y5y6y7y9y12y14y16y17y18                                            | 1970.00 | 63.090  | 164916 | 3 | 657.34 | -9.17  |
| Q9ZF60 GLTI_SALTY Glutamate/aartate periplasmic-binding protein; | 2  |                      | AVAFMMDDALLAGER            | 198 | 15 | 13 | 124.17 | b3b5b6y3°y3y4y5y8y10y11y12y13y15                                            | 1609.77 | 84.267  | 135549 | 2 | 805.39 | 0.91   |
| Q9ZF60 GLTI_SALTY Glutamate/aartate periplasmic-binding protein; | 3  |                      | ESSVPFSYYDNQKK             | 47  | 14 | 17 | 115.6  | b2°b2b4°b4b7b11y1y4y5y6y7y8y9y10°y10*y10y14                                 | 1691.76 | 55.360  | 135103 | 2 | 846.38 | 2.67   |

|                                                                  |    |                       |                                 |     |    |    |        |                                                                       |         |         |        |   |         |        |
|------------------------------------------------------------------|----|-----------------------|---------------------------------|-----|----|----|--------|-----------------------------------------------------------------------|---------|---------|--------|---|---------|--------|
| Q9ZF60 GLTI_SALTY Glutamate/aartate periplasmic-binding protein; | 4  |                       | VVGYSQDYSNAIVEAVK               | 61  | 17 | 24 | 182.98 | b3b6b7b11*b11b13*b13b14b15b17y2y3y4y5y6y10*y10y11*y11y12*y12y13y15y17 | 1841.93 | 67.672  | 116841 | 2 | 921.47  | 2.12   |
| Q9ZF60 GLTI_SALTY Glutamate/aartate periplasmic-binding protein; | 5  |                       | LNKPDLQVK                       | 80  | 9  | 5  | 30.48  | b3*b3y4y6y9                                                           | 1054.61 | 37.746  | 36398  | 2 | 527.81  | -10.65 |
| Q9ZF60 GLTI_SALTY Glutamate/aartate periplasmic-binding protein; | 6  | Carbamidomethyl+C(13) | IPLLQNGTDFECGSTNNLER            | 98  | 22 | 10 | 28.95  | b3b13y1y2*y2y5y6y8*y8y22                                              | 2526.20 | 81.503  | 33111  | 3 | 842.74  | 1.45   |
| Q9ZF60 GLTI_SALTY Glutamate/aartate periplasmic-binding protein; | 7  |                       | LIPITSQNR                       | 89  | 9  | 6  | 54.49  | b2y5y6y7y8y9                                                          | 1041.59 | 42.880  | 30143  | 2 | 521.30  | -13.59 |
| Q9ZF60 GLTI_SALTY Glutamate/aartate periplasmic-binding protein; | 8  |                       | IISAKDHGDSFR                    | 180 | 12 | 4  | 32.18  | b9b11y3y10                                                            | 1345.67 | 31.626  | 23480  | 3 | 449.23  | -13.88 |
| Q9ZF60 GLTI_SALTY Glutamate/aartate periplasmic-binding protein; | 9  |                       | GGDIKDFPDLK                     | 141 | 11 | 5  | 24.3   | b2b7b9y10y11                                                          | 1204.63 | 69.863  | 21084  | 2 | 602.82  | 6.38   |
| Q9ZF60 GLTI_SALTY Glutamate/aartate periplasmic-binding protein; | 10 |                       | LMDDTIAQAQTSGEAEK               | 247 | 17 | 3  | 16.31  | b7b9y11                                                               | 1807.85 | 46.034  | 5383   | 2 | 904.43  | 7.83   |
| Q9ZF60 GLTI_SALTY Glutamate/aartate periplasmic-binding protein; | 11 |                       | NGVIVVGHR                       | 38  | 9  | 4  | 54.49  | y4y5y6y7                                                              | 950.54  | 32.820  | 117989 | 2 | 475.77  | -14.96 |
| Q9ZF60 GLTI_SALTY Glutamate/aartate periplasmic-binding protein; | 12 | Carbamidomethyl+C(19) | KPDNWEIVGKPKSQEAYGCMLR          | 217 | 22 | 7  | 35.38  | b3b9*b9y4y6y10y13                                                     | 2606.27 | 136.215 | 17273  | 3 | 869.43  | 8.06   |
| Q9ZF60 GLTI_SALTY Glutamate/aartate periplasmic-binding protein; | 13 | Carbamidomethyl+C(22) | LIPITSQNRIPLLQNGTDFECGSTNNLER   | 89  | 31 | 18 | 153.09 | b3b9b10b11b14y6y7y8y9*y9y10y11y12y13y14*y14y16y21                     | 3548.79 | 86.588  | 294061 | 3 | 1183.60 | 3.58   |
| Q9ZF60 GLTI_SALTY Glutamate/aartate periplasmic-binding protein; | 14 |                       | NLNMNFELSDMKALFK                | 277 | 17 | 3  | 23.3   | b5b6y9                                                                | 2043.98 | 91.198  | 6013   | 3 | 682.00  | -4.72  |
| Q9ZF60 GLTI_SALTY Glutamate/aartate periplasmic-binding protein; | 15 |                       | TLESGRAVAFMMDDALLAGER           | 192 | 21 | 8  | 54.33  | b6b9b11b13y4y10y13y14                                                 | 2253.08 | 106.064 | 1769   | 3 | 751.70  | -11.05 |
| Q9ZF60 GLTI_SALTY Glutamate/aartate periplasmic-binding protein; | 16 | Oxidation+M(5)        | LTTAMLVMGLSAGLAHAEDGAP AAGSTLDK | 5   | 30 | 3  | 11.38  | b5b8y6                                                                | 2885.47 | 87.343  | 18892  | 3 | 962.50  | 12.61  |
| Q9ZF60 GLTI_SALTY Glutamate/aartate periplasmic-binding protein; | 17 |                       | NKPDQLQVK                       | 81  | 8  | 0  | 1.62   |                                                                       | 941.54  | 37.748  | 25192  | 2 | 471.27  | -1.75  |
| Q9ZF60 GLTI_SALTY Glutamate/aartate periplasmic-binding protein; | 18 |                       | SAKDHGDSFR                      | 182 | 10 | 0  | 2.83   |                                                                       | 1119.53 | 31.580  | 6698   | 2 | 560.27  | 10.14  |
| Q8ZKQ1 LSRB_SALTY Autoinducer 2-binding protein lsrB;            | 1  |                       | NNLAIVGFSTPNVMRPYVQR            | 237 | 20 | 15 | 100.07 | b2*b2b3b4*b4b5y5y10y12y14*y14y15y16y17y20                             | 2276.17 | 77.944  | 113048 | 3 | 759.39  | -12.98 |
| Q8ZKQ1 LSRB_SALTY Autoinducer 2-binding protein lsrB;            | 2  |                       | AYPDLDAIIPDANALPAAQAEE NLKR     | 209 | 28 | 19 | 124.74 | b1b2b8b9b10b13y3y4y5*y5y6y9y10*y10y12y18y19y20y28                     | 2863.50 | 87.340  | 101507 | 3 | 955.17  | 1.62   |
| Q8ZKQ1 LSRB_SALTY Autoinducer 2-binding protein lsrB;            | 3  |                       | ISQEHPGWEIVTTQFGYNDATK          | 177 | 22 | 14 | 99.39  | b5b9b10b11b12b19y1y6*y6*y6y7y8y9y22                                   | 2521.19 | 72.715  | 73575  | 3 | 841.07  | -1.84  |
| Q8ZKQ1 LSRB_SALTY Autoinducer 2-binding protein lsrB;            | 4  |                       | LVGVGFFTSGGNGAQEAGK             | 35  | 19 | 15 | 86.93  | b2b3b15b17y2y3y4y8*y8y12y14y15*y15y17y19                              | 1795.90 | 71.494  | 68554  | 2 | 898.45  | 1.29   |
| Q8ZKQ1 LSRB_SALTY Autoinducer 2-binding protein lsrB;            | 5  |                       | SYIINQGTTPK                     | 124 | 10 | 11 | 74.33  | b2b3y3y4*y4y5y7*y7y8*y8y10                                            | 1170.58 | 38.309  | 67063  | 2 | 585.79  | -1.67  |

|                                                       |    |                       |                              |     |    |    |        |                                              |         |         |       |   |         |        |
|-------------------------------------------------------|----|-----------------------|------------------------------|-----|----|----|--------|----------------------------------------------|---------|---------|-------|---|---------|--------|
| Q8ZKQ1 LSRB_SALTY Autoinducer 2-binding protein lsrB; | 6  | Carbamidomethyl+C(12) | ILTWSDTKPECR                 | 111 | 13 | 9  | 77.77  | b1b2y2y4y6y8y9y10y11                         | 1620.75 | 50.188  | 62182 | 3 | 540.92  | -9.34  |
| Q8ZKQ1 LSRB_SALTY Autoinducer 2-binding protein lsrB; | 7  |                       | VAFFYSSPTVTDQNQWVK           | 154 | 18 | 12 | 92.03  | b5b7b12y5y6y8y11y12y13°y13y14y18             | 2117.05 | 77.484  | 56164 | 2 | 1059.03 | 6.46   |
| Q8ZKQ1 LSRB_SALTY Autoinducer 2-binding protein lsrB; | 8  |                       | ISVYVANALLK                  | 273 | 11 | 5  | 36.06  | y2y6y7y8y11                                  | 1190.71 | 73.596  | 52429 | 2 | 595.86  | -5.23  |
| Q8ZKQ1 LSRB_SALTY Autoinducer 2-binding protein lsrB; | 9  |                       | VTVSPNSEQGYHYEAK             | 301 | 16 | 14 | 115.62 | y2y4y5y6y7°y7y8°y8*y8y10y11y12y14y16         | 1808.82 | 36.407  | 48472 | 3 | 603.61  | -12.89 |
| Q8ZKQ1 LSRB_SALTY Autoinducer 2-binding protein lsrB; | 10 |                       | NMPMNVGDSLDPGIGK             | 284 | 17 | 12 | 48.89  | b1b2b6b17y1y5y7y11y14y15*y15y17              | 1757.87 | 79.387  | 43643 | 2 | 879.44  | 5.90   |
| Q8ZKQ1 LSRB_SALTY Autoinducer 2-binding protein lsrB; | 11 |                       | SLQTAEGIIK                   | 199 | 10 | 8  | 58.11  | b1b2b9y4y5y6y7y10                            | 1059.60 | 51.005  | 42725 | 2 | 530.30  | -8.06  |
| Q8ZKQ1 LSRB_SALTY Autoinducer 2-binding protein lsrB; | 12 |                       | EFLWDVVQQGK                  | 261 | 12 | 8  | 47.92  | y2y3*y3y4*y4y7y8y12                          | 1405.71 | 82.385  | 33490 | 2 | 703.36  | 0.00   |
| Q8ZKQ1 LSRB_SALTY Autoinducer 2-binding protein lsrB; | 13 |                       | GNGIVLLPER                   | 317 | 10 | 7  | 51.88  | b2*b2y3y4y5y6y10                             | 1067.61 | 61.384  | 25577 | 2 | 534.31  | -7.55  |
| Q8ZKQ1 LSRB_SALTY Autoinducer 2-binding protein lsrB; | 14 |                       | QLGSMLEVMAAHQVDK             | 134 | 16 | 3  | 25.53  | y3y6y7                                       | 1756.88 | 56.519  | 5927  | 2 | 878.95  | 6.32   |
| Q8ZKQ1 LSRB_SALTY Autoinducer 2-binding protein lsrB; | 15 |                       | IAFIPK                       | 29  | 6  | 2  | 26.84  | y4y5                                         | 688.43  | 54.181  | 14644 | 2 | 344.72  | -13.65 |
| Q8ZKQ1 LSRB_SALTY Autoinducer 2-binding protein lsrB; | 16 |                       | MIALLTAFLASAAMTVQAAER        | 7   | 22 | 5  | 19.95  | y3y5°y5*y5y11                                | 2236.17 | 72.900  | 6560  | 2 | 1118.59 | -4.04  |
| Q8ZKQ1 LSRB_SALTY Autoinducer 2-binding protein lsrB; | 17 |                       | AYPDLDAIIAPDANALPAAQAAE NLK  | 209 | 27 | 6  | 26.93  | b4b9b10*b10b16y12                            | 2707.38 | 94.543  | 2729  | 4 | 677.60  | -3.70  |
| Q8ZKQ1 LSRB_SALTY Autoinducer 2-binding protein lsrB; | 18 |                       | AKISQEHPGWEIVTTQFGYNDAT K    | 175 | 24 | 13 | 66.27  | b9*b9b10*b10b13y5y6°y6y7y12°y12y20y22        | 2720.33 | 69.048  | 7882  | 3 | 907.45  | -1.35  |
| Q8ZKQ1 LSRB_SALTY Autoinducer 2-binding protein lsrB; | 19 |                       | AKVAFFYSSPTVTDQNQWVK         | 152 | 20 | 6  | 45.71  | b10b11y7y8y11y13                             | 2316.15 | 81.166  | 1560  | 2 | 1158.58 | -4.85  |
| Q8ZKQ1 LSRB_SALTY Autoinducer 2-binding protein lsrB; | 20 | Phosphoryl STY(17)    | NNLAIVGFSTPNVMRPYVQR         | 237 | 20 | 3  | 21.16  | y3y5y12_H3PO4 y12                            | 2356.14 | 94.431  | 14330 | 4 | 589.79  | -7.67  |
| Q8ZKQ1 LSRB_SALTY Autoinducer 2-binding protein lsrB; | 21 | Oxidation+M(4)        | NMPMNVGDSLDPGIGK             | 284 | 17 | 4  | 29.9   | b12b13y4y14                                  | 1773.84 | 71.367  | 1848  | 2 | 887.43  | -4.68  |
| Q8ZKQ1 LSRB_SALTY Autoinducer 2-binding protein lsrB; | 22 |                       | NNLAIVGFSTPNVM               | 237 | 14 | 4  | 21.04  | y6°y6y7*y7                                   | 1476.76 | 77.958  | 17109 | 2 | 738.88  | 6.70   |
| Q8ZKQ1 LSRB_SALTY Autoinducer 2-binding protein lsrB; | 23 |                       | PDANALPAAQAENLKR             | 219 | 18 | 5  | 17.72  | b4b6°b6*b6b9                                 | 1820.94 | 87.295  | 1983  | 3 | 607.65  | -10.79 |
| Q8ZKQ1 LSRB_SALTY Autoinducer 2-binding protein lsrB; | 24 |                       | VSPNSEQGYHYEAK               | 303 | 14 | 0  | 4.45   |                                              | 1608.72 | 36.411  | 1677  | 2 | 804.87  | -2.73  |
| P67093 UG_SALTY Universal stress protein G;           | 1  |                       | HATLPVLVVR                   | 132 | 10 | 7  | 51.88  | b2y2y4y6y7y8y10                              | 1104.68 | 60.853  | 72056 | 2 | 552.84  | -10.50 |
| P67093 UG_SALTY Universal stress protein G;           | 2  |                       | TIIMPVDVFEMELSDK             | 3   | 16 | 18 | 144.48 | b2°b2b3b4°b4b13y1y3y5°y5y6y7y8y9y10y12y14y16 | 1866.93 | 104.252 | 65278 | 2 | 933.97  | 5.69   |
| P67093 UG_SALTY Universal stress protein G;           | 3  |                       | NPSITTHLLGSNASSVVR           | 114 | 18 | 6  | 34.64  | b5°b5y4y5y10y14                              | 1852.97 | 58.698  | 37539 | 3 | 618.33  | -9.88  |
| P67093 UG_SALTY Universal stress protein G;           | 4  |                       | HAEFLAQDGVIIHLHLVPGSAS MSLHR | 22  | 28 | 4  | 11.7   | b10*b10y6y13                                 | 3063.53 | 83.287  | 19819 | 4 | 766.64  | -22.31 |
| P67093 UG_SALTY Universal stress protein G;           | 5  |                       | LQTMVGHFSDPSR                | 69  | 14 | 3  | 27.06  | b6b7b11                                      | 1587.78 | 89.618  | 1901  | 2 | 794.39  | -9.00  |
| P67093 UG_SALTY Universal stress protein G;           | 6  |                       | TIIMPVDVFEMELSDKAIR          | 3   | 19 | 8  | 90.91  | b3y4y6y9y11y13y15y17                         | 2207.13 | 100.310 | 51249 | 3 | 736.38  | -6.75  |
| P67093 UG_SALTY Universal stress protein G;           | 7  |                       | RFEHLQHEAETR                 | 56  | 13 | 4  | 20.63  | b4°b4y3y5                                    | 1681.79 | 40.858  | 3953  | 4 | 421.20  | -10.31 |
| P67093 UG_SALTY Universal stress protein G;           | 8  | Oxidation+M(4)        | LQTMVGHFSDPSR                | 69  | 14 | 4  | 19.28  | b6y6°y6y9                                    | 1603.80 | 49.663  | 9082  | 3 | 535.27  | 3.73   |

|                                                                         |    |                      |                                        |     |    |    |        |                                                                                   |         |         |        |   |         |        |
|-------------------------------------------------------------------------|----|----------------------|----------------------------------------|-----|----|----|--------|-----------------------------------------------------------------------------------|---------|---------|--------|---|---------|--------|
| P0A283 PTGA_SALTY Glucose-ecific phohotransferase enzyme IIA component; | 1  |                      | STLTPVVISNMDEIKELIK                    | 133 | 19 | 23 | 138.36 | b2°b2b3°b3b4°b4b19y1y2y3y4°y4y5y6y11°y11*y11y12y13y15y16y17y19                    | 2130.15 | 92.426  | 242018 | 3 | 710.72  | -9.86  |
| P0A283 PTGA_SALTY Glucose-ecific phohotransferase enzyme IIA component; | 2  |                      | MVAPVDGTIGK                            | 59  | 11 | 14 | 111.38 | b2b3b8y1y2y3y5°y5y6y7y8y9y10y11                                                   | 1087.57 | 46.140  | 107960 | 2 | 544.29  | -7.18  |
| P0A283 PTGA_SALTY Glucose-ecific phohotransferase enzyme IIA component; | 3  |                      | VGDPVIEFDLPLLEEK                       | 115 | 16 | 14 | 109.81 | b1b4b5b6b7y2°y2y4y6y9y10y11y13y16                                                 | 1812.97 | 99.289  | 107787 | 2 | 906.99  | 4.11   |
| P0A283 PTGA_SALTY Glucose-ecific phohotransferase enzyme IIA component; | 4  |                      | STLTPVVISNMDEIK                        | 133 | 15 | 5  | 26.21  | y2y3y5°y5y11                                                                      | 1646.88 | 72.947  | 7711   | 2 | 823.94  | 8.52   |
| P0A283 PTGA_SALTY Glucose-ecific phohotransferase enzyme IIA component; | 5  |                      | DTGTIEIVAPLSGEIVNIEDVPDVVFAEK          | 16  | 29 | 8  | 28.97  | b6b9b10b14y1y2y3y8                                                                | 3069.59 | 110.989 | 3570   | 3 | 1023.87 | 1.27   |
| P0A283 PTGA_SALTY Glucose-ecific phohotransferase enzyme IIA component; | 6  |                      | MGLFDK                                 | 0   | 6  | 1  | 13.62  | b5                                                                                | 710.35  | 96.742  | 2333   | 1 | 710.35  | -8.68  |
| P0A283 PTGA_SALTY Glucose-ecific phohotransferase enzyme IIA component; | 7  |                      | VKVGDPVIEFDLPLLEEK                     | 113 | 18 | 5  | 21.74  | b7b11y3°y3y6                                                                      | 2040.11 | 95.037  | 126283 | 3 | 680.71  | -9.33  |
| P0A283 PTGA_SALTY Glucose-ecific phohotransferase enzyme IIA component; | 8  |                      | VGDPVIEFDLPLLEEKAK                     | 115 | 18 | 3  | 15.58  | b4y5y13                                                                           | 2012.07 | 91.268  | 15615  | 3 | 671.36  | -14.44 |
| P0A283 PTGA_SALTY Glucose-ecific phohotransferase enzyme IIA component; | 9  |                      | APVDGTIGK                              | 61  | 9  | 5  | 47.51  | b4b5b6°b6b8                                                                       | 857.47  | 46.165  | 3713   | 1 | 857.47  | -7.83  |
| P0A283 PTGA_SALTY Glucose-ecific phohotransferase enzyme IIA component; | 10 |                      | PVDGTIGK                               | 62  | 8  | 5  | 47.51  | b3b4b5°b5b7                                                                       | 786.43  | 46.141  | 2826   | 1 | 786.43  | -7.14  |
| P17215 LIVJ_SALTY Leu/Ile/Val/Thr-binding protein;                      | 1  |                      | TQFMGPEGVANVSLNIAGESAEGLLVTKPK         | 240 | 31 | 23 | 199.01 | b2°b2b3b4b5b11b12y3y4y5y6y8y13y14y17y19y22y24y26y27y28y29y31                      | 3144.63 | 88.165  | 316718 | 3 | 1048.88 | 2.10   |
| P17215 LIVJ_SALTY Leu/Ile/Val/Thr-binding protein;                      | 2  |                      | TTGLDSDQGPTAAK                         | 137 | 14 | 30 | 194.11 | b2°b2b3°b3b4b5°b5b7b8°b8°b8b11°b11b12°b12y1y2y3y5y6°y6y8y9*y9y10°y10y11*y11y12y14 | 1361.65 | 29.407  | 147345 | 2 | 681.33  | -4.21  |
| P17215 LIVJ_SALTY Leu/Ile/Val/Thr-binding protein;                      | 3  | Carbamidomethyl+C(7) | YVIGHLCSSSTQPASDIYEDEGILMITPAATAPELTAR | 92  | 38 | 16 | 94.39  | b2b12°b12b24b25b26b27°b27y6y8y10y11y12y13y15y38                                   | 4078.01 | 89.141  | 144313 | 3 | 1360.01 | 7.60   |
| P17215 LIVJ_SALTY Leu/Ile/Val/Thr-binding protein;                      | 4  |                      | VAVVGAMSGPVAQYGDQEFTGAEQAIADINAK       | 25  | 32 | 24 | 111.45 | b1b2b3b4b6b9°b9b14y1y2y3y4*y4y5°y5*y5y6°y6y7y12y13°y13y14y32                      | 3207.58 | 89.639  | 109540 | 3 | 1069.86 | 4.11   |
| P17215 LIVJ_SALTY Leu/Ile/Val/Thr-binding protein;                      | 5  |                      | GGVNVVFFDGITAGEKDFSTLVAR               | 185 | 24 | 11 | 48.92  | b3b4b6°b6b12y2y10y13y18y19y24                                                     | 2499.28 | 101.852 | 90343  | 3 | 833.77  | -1.47  |
| P17215 LIVJ_SALTY Leu/Ile/Val/Thr-binding protein;                      | 6  |                      | ENIDFVYYGGYHPMGQILR                    | 212 | 20 | 5  | 21.16  | b2y9y12y14y20                                                                     | 2401.13 | 79.843  | 72180  | 3 | 801.05  | 1.42   |
| P17215 LIVJ_SALTY Leu/Ile/Val/Thr-binding protein;                      | 7  |                      | QQYGEGLAR                              | 168 | 9  | 5  | 38.26  | y1y4y6y7y9                                                                        | 1021.50 | 32.930  | 67933  | 2 | 511.25  | -5.92  |
| P17215 LIVJ_SALTY Leu/Ile/Val/Thr-binding protein;                      | 8  |                      | QDPSGAFVWTTYAALQSLQAGLNHSDDPAEIAK      | 290 | 33 | 7  | 21.59  | b2b8y2y8y10y11y33                                                                 | 3501.73 | 108.942 | 9905   | 3 | 1167.91 | 9.97   |
| P17215 LIVJ_SALTY Leu/Ile/Val/Thr-binding protein;                      | 9  |                      | NYDQVPANKPIVDAIK                       | 271 | 16 | 8  | 51.5   | b3°b3b4y5y7y11°y11y12                                                             | 1784.92 | 53.666  | 307791 | 3 | 595.65  | -17.51 |
| P17215 LIVJ_SALTY Leu/Ile/Val/Thr-binding protein;                      | 10 | Carbamidomethyl+C(6) | TLLAGCIALSLSHMAFADDIK                  | 4   | 21 | 4  | 35.82  | b7b8y4y5                                                                          | 2247.14 | 67.455  | 15450  | 3 | 749.72  | -5.65  |

|                                                          |    |                                          |                                        |     |    |    |        |                                                                                                            |         |         |        |   |         |        |
|----------------------------------------------------------|----|------------------------------------------|----------------------------------------|-----|----|----|--------|------------------------------------------------------------------------------------------------------------|---------|---------|--------|---|---------|--------|
| P17215 LIVJ_SALTY Leu/Ile/Val/Thr-binding protein;       | 11 |                                          | GATVDTVMGPLSWDEK                       | 326 | 16 | 5  | 27.66  | b5°b5b8b14y14                                                                                              | 1705.83 | 81.452  | 1571   | 3 | 569.28  | 12.88  |
| P17215 LIVJ_SALTY Leu/Ile/Val/Thr-binding protein;       | 12 |                                          | KQDPSGAFVWTTYAALQSLQAGL<br>NHSDDPAEIAK | 289 | 34 | 30 | 218.5  | b3*b3b6b7°b7b8*b8b9°b9<br>b10b13°b13b15y3y6y10y1<br>1y12y14y15y17°y17y18*y1<br>8y19y20y21y22y23y24         | 3629.76 | 102.376 | 335923 | 4 | 908.20  | -6.86  |
| P17215 LIVJ_SALTY Leu/Ile/Val/Thr-binding protein;       | 13 |                                          | GDLKGFEGVFDWHANGTATDA<br>K             | 342 | 23 | 3  | 19.45  | y9y11y15                                                                                                   | 2483.19 | 90.177  | 27712  | 3 | 828.40  | 12.29  |
| P17215 LIVJ_SALTY Leu/Ile/Val/Thr-binding protein;       | 14 | Carbamidomethyl+C(10)                    | LVAVKYDDACDPK                          | 64  | 13 | 5  | 25.41  | b10b11°b11y3°y3                                                                                            | 1493.73 | 50.693  | 1700   | 3 | 498.58  | -0.41  |
| P17215 LIVJ_SALTY Leu/Ile/Val/Thr-binding protein;       | 15 | Oxidation+M(8)                           | GATVDTVMGPLSWDEK                       | 326 | 16 | 3  | 17.15  | b5y6y11                                                                                                    | 1721.83 | 90.570  | 8346   | 3 | 574.61  | 11.56  |
| P17215 LIVJ_SALTY Leu/Ile/Val/Thr-binding protein;       | 16 | Carbamidomethyl+C(6);<br>Oxidation+M(14) | TLLAGCIALSLSHMAFADDIK                  | 4   | 21 | 3  | 22.32  | b14y4y5                                                                                                    | 2263.15 | 63.058  | 4967   | 3 | 755.06  | 2.16   |
| P17215 LIVJ_SALTY Leu/Ile/Val/Thr-binding protein;       | 17 |                                          | SGPVAQYGDQEFTHAEQAIADINA<br>K          | 32  | 25 | 1  | 9.83   | b7                                                                                                         | 2580.26 | 89.663  | 2250   | 2 | 1290.63 | 14.48  |
| P0A1S0 IHFA_SALTY Integration host factor subunit alpha; | 1  |                                          | TGEDIPITAR                             | 66  | 10 | 11 | 101.74 | b2b3b4°b4y3y5y6y7y8y9y1<br>0                                                                               | 1072.56 | 42.949  | 52058  | 2 | 536.78  | -7.40  |
| P0A1S0 IHFA_SALTY Integration host factor subunit alpha; | 2  |                                          | LSGFGNFDLR                             | 45  | 10 | 8  | 47.9   | b5b10y3y6°y6y8°y8y10                                                                                       | 1125.58 | 58.522  | 14794  | 2 | 563.30  | 12.47  |
| P0A1S0 IHFA_SALTY Integration host factor subunit alpha; | 3  |                                          | AEMSEYLFDK                             | 5   | 10 | 3  | 26.9   | b7b9y9                                                                                                     | 1232.57 | 31.738  | 1990   | 3 | 411.53  | 14.56  |
| P0A1S0 IHFA_SALTY Integration host factor subunit alpha; | 4  |                                          | DAKELVELFFEEIR                         | 21  | 14 | 8  | 68.17  | b3°b3b5b7b9y4y5y8                                                                                          | 1737.92 | 33.071  | 16320  | 4 | 435.24  | 9.62   |
| P0A2A3 RL1_SALTY 50S ribosomal protein L1;               | 1  |                                          | VVGQLGQVLGPR                           | 122 | 12 | 12 | 97.78  | b2b4b5y2y3y6y7y8y10*y1<br>0y11y12                                                                          | 1222.72 | 59.069  | 99102  | 2 | 611.86  | -8.89  |
| P0A2A3 RL1_SALTY 50S ribosomal protein L1;               | 2  |                                          | VAVFTQGPNAEAAK                         | 74  | 14 | 16 | 126.47 | b3b11b12b13b14y4y5y7y8<br>y9*y9y10*y10y11°y11y14                                                           | 1402.73 | 45.175  | 77659  | 2 | 701.87  | 0.00   |
| P0A2A3 RL1_SALTY 50S ribosomal protein L1;               | 3  |                                          | VGTVPNVAEAVK                           | 141 | 13 | 12 | 116.17 | b3°b3y1y3y5y6y7y8y9y10y<br>12y13                                                                           | 1284.71 | 48.031  | 68215  | 2 | 642.86  | -1.62  |
| P0A2A3 RL1_SALTY 50S ribosomal protein L1;               | 4  |                                          | GATVLPHTGR                             | 60  | 11 | 6  | 50.52  | y2y3y4°y4y5y6                                                                                              | 1065.57 | 29.640  | 20625  | 2 | 533.29  | -5.61  |
| P0A2A3 RL1_SALTY 50S ribosomal protein L1;               | 5  |                                          | AAGAELVGMEDLADQIK                      | 88  | 17 | 7  | 53.82  | b3b4b6y7y10y11y15                                                                                          | 1730.87 | 79.494  | 14484  | 2 | 865.94  | 5.22   |
| P0A2A3 RL1_SALTY 50S ribosomal protein L1;               | 6  |                                          | GEMNFDVVIASPDAMR                       | 106 | 16 | 3  | 17.15  | b8b13y3                                                                                                    | 1751.84 | 62.284  | 4361   | 3 | 584.62  | 17.28  |
| P0A2A3 RL1_SALTY 50S ribosomal protein L1;               | 7  |                                          | FNESVDVAVNLGIDAR                       | 37  | 16 | 3  | 17.15  | b4b13y5                                                                                                    | 1718.85 | 76.799  | 1574   | 4 | 430.47  | -12.14 |
| P0A2A3 RL1_SALTY 50S ribosomal protein L1;               | 8  |                                          | KGEMNFDVVIASPDAMR                      | 105 | 17 | 3  | 16.31  | b8y5y9                                                                                                     | 1879.88 | 40.222  | 58107  | 3 | 627.30  | -14.22 |
| P0A2A3 RL1_SALTY 50S ribosomal protein L1;               | 9  |                                          | AAGAELVGMEDLADQIKK                     | 88  | 18 | 5  | 26.57  | b3b4b13y11°y11                                                                                             | 1858.94 | 72.933  | 4641   | 3 | 620.32  | -8.60  |
| P0A2A3 RL1_SALTY 50S ribosomal protein L1;               | 10 |                                          | SVRVAVFTQGPNAEAAK                      | 71  | 17 | 6  | 26.14  | b13y12y14°y14*y14y16                                                                                       | 1744.93 | 136.791 | 1891   | 1 | 1744.93 | -3.29  |
| P0A2A3 RL1_SALTY 50S ribosomal protein L1;               | 11 | Oxidation+M(9)                           | AAGAELVGMEDLADQIKK                     | 88  | 18 | 3  | 22.74  | b3b5b15                                                                                                    | 1874.97 | 94.988  | 5147   | 3 | 625.66  | 10.48  |
| P0A2A3 RL1_SALTY 50S ribosomal protein L1;               | 12 |                                          | TVLPHGTGR                              | 62  | 9  | 0  | 2.43   |                                                                                                            | 937.51  | 29.641  | 15722  | 2 | 469.26  | -11.78 |
| P25077 MDH_SALTY Malate dehydrogenase;                   | 1  |                                          | NQLPSGSELSLYDIAPVTPGVAVD<br>LSHIPTAVK  | 21  | 33 | 32 | 135.42 | b1b2*b2b3*b3b5°b5b6b10<br>°b10b12*b12b13*b13b15*<br>b15b16*b16b27y1y2y3y4y<br>5°y5y6y12y15y18y19y30y3<br>3 | 3388.82 | 93.558  | 181176 | 3 | 1130.28 | 5.55   |
| P25077 MDH_SALTY Malate dehydrogenase;                   | 2  | Carbamidomethyl+C(2)                     | ACVGITNPVNTTVAIAAEVLKK                 | 111 | 23 | 16 | 90.46  | b2b3b4b5b13*b13y1y2y3y<br>4y13y15y18y20y21y23                                                              | 2382.33 | 104.383 | 157236 | 3 | 794.78  | -3.69  |

|                                            |    |                       |                                            |     |    |    |        |                                                                               |         |         |        |   |         |        |
|--------------------------------------------|----|-----------------------|--------------------------------------------|-----|----|----|--------|-------------------------------------------------------------------------------|---------|---------|--------|---|---------|--------|
| P25077 MDH_SALTY Malate dehydrogenase;     | 3  |                       | FFSQPLLLGK                                 | 262 | 10 | 9  | 61.12  | b2b3°b3y2y3y4y6y8y10                                                          | 1149.66 | 75.679  | 156696 | 2 | 575.33  | -6.16  |
| P25077 MDH_SALTY Malate dehydrogenase;     | 4  |                       | VAVLGAAGGIGQALALLK                         | 2   | 19 | 20 | 180.78 | b2b3b6b7b8b9b10y1y2y3y4y5y6y7y9y11y12y13y15y19                                | 1735.08 | 119.517 | 131770 | 2 | 868.04  | -1.48  |
| P25077 MDH_SALTY Malate dehydrogenase;     | 5  |                       | IQNAGTEVVEAK                               | 205 | 12 | 28 | 163.86 | b2°b2b3b4°b4b9b11°b11y1y2y3°y3y4y5y6y7°y7y8°y8y9y10°y10*y10y11°y11*y11y12*y12 | 1258.66 | 34.582  | 110361 | 2 | 629.83  | -4.56  |
| P25077 MDH_SALTY Malate dehydrogenase;     | 6  |                       | AGGGSATLSMGQAAAR                           | 217 | 16 | 15 | 93.86  | b4b6b16°b16y5y7y8y9°y9*y9y10*y10y11*y11y12                                    | 1405.68 | 39.970  | 71198  | 2 | 703.35  | -1.56  |
| P25077 MDH_SALTY Malate dehydrogenase;     | 7  |                       | DIQLGEDFINK                                | 301 | 11 | 6  | 36.72  | b3b4b8°b8y8*y8                                                                | 1291.64 | 67.651  | 62835  | 2 | 646.33  | -6.33  |
| P25077 MDH_SALTY Malate dehydrogenase;     | 8  |                       | SDLFNVNAGIVK                               | 87  | 12 | 6  | 34.24  | b2b3y6y8y9y12                                                                 | 1276.68 | 69.508  | 36128  | 2 | 638.85  | -5.35  |
| P25077 MDH_SALTY Malate dehydrogenase;     | 9  |                       | LFGVTTLDIIR                                | 142 | 11 | 5  | 24.3   | b2b3y1y3y9                                                                    | 1247.73 | 88.812  | 26320  | 2 | 624.37  | -7.53  |
| P25077 MDH_SALTY Malate dehydrogenase;     | 10 |                       | GFSGEDATPALEGADVVLISAGVAR                  | 56  | 25 | 3  | 21.94  | b3b4y4                                                                        | 2402.23 | 90.609  | 9184   | 2 | 1201.62 | 5.39   |
| P25077 MDH_SALTY Malate dehydrogenase;     | 11 |                       | SIGTLSAFEQHSLDAMLDTLK                      | 279 | 21 | 3  | 13.87  | b9y8y13                                                                       | 2277.13 | 101.069 | 1651   | 3 | 759.72  | -5.04  |
| P25077 MDH_SALTY Malate dehydrogenase;     | 12 |                       | FGLSLVR                                    | 233 | 7  | 4  | 53.68  | y3y4y5y6                                                                      | 791.46  | 66.619  | 75236  | 2 | 396.24  | -17.20 |
| P25077 MDH_SALTY Malate dehydrogenase;     | 13 | Carbamidomethyl+C(5)  | GVVECAYVEGDGQYAR                           | 246 | 16 | 4  | 17.15  | b10y4*y4y7                                                                    | 1772.82 | 49.875  | 5413   | 2 | 886.91  | 15.08  |
| P25077 MDH_SALTY Malate dehydrogenase;     | 14 | Carbamidomethyl+C(11) | ALQGEKGVVECAYVEGDGQYAR                     | 240 | 22 | 3  | 13.43  | b13y7y9                                                                       | 2399.12 | 51.857  | 19870  | 3 | 800.38  | -3.46  |
| P25077 MDH_SALTY Malate dehydrogenase;     | 15 |                       | GKLPTEVEVPVIGGHSGVTILPLLSQIPGVSFTEQEAAELTK | 162 | 42 | 4  | 21.4   | b17b20b21y4                                                                   | 4341.35 | 112.734 | 13722  | 4 | 1086.09 | -2.59  |
| P25077 MDH_SALTY Malate dehydrogenase;     | 16 |                       | IQNAGTEVVEAKAGGGSATLSMGQAAAR               | 205 | 28 | 4  | 22.32  | b7b8b16y16                                                                    | 2645.34 | 90.631  | 3422   | 4 | 662.09  | 3.23   |
| P25077 MDH_SALTY Malate dehydrogenase;     | 17 |                       | SIGTLSAFEQHSLDAMLDTLKK                     | 279 | 22 | 5  | 25.59  | b11b16y10y15y19                                                               | 2405.23 | 136.833 | 2550   | 2 | 1203.12 | -2.94  |
| P25077 MDH_SALTY Malate dehydrogenase;     | 18 |                       | AGGGSATLSMGQAAARFGLSLVR                    | 217 | 23 | 4  | 28.8   | b6b8b10b13                                                                    | 2178.12 | 105.205 | 1966   | 2 | 1089.56 | -13.11 |
| P25077 MDH_SALTY Malate dehydrogenase;     | 19 |                       | NQLPSGSEL                                  | 21  | 9  | 1  | 10.07  | y5                                                                            | 944.47  | 93.511  | 1753   | 1 | 944.47  | -1.94  |
| P0A7W4 RS5_SALTY 30S ribosomal protein S5; | 1  |                       | AVLEVAGVHNVLAK                             | 112 | 14 | 12 | 95.06  | b2b6y1y2y3y6y8y9y10y11y12y14                                                  | 1419.83 | 60.415  | 107369 | 2 | 710.42  | 0.17   |
| P0A7W4 RS5_SALTY 30S ribosomal protein S5; | 2  |                       | VFMQPASEGTHIAGGAMR                         | 93  | 19 | 19 | 188.1  | b2b3b4b7b12b13b14b16y4y5y6y7y11y12y13y14y15y16y19                             | 1892.95 | 67.926  | 104616 | 2 | 946.98  | 5.09   |
| P0A7W4 RS5_SALTY 30S ribosomal protein S5; | 3  |                       | AYGSTNPINVVR                               | 126 | 12 | 13 | 93.8   | b2b3b5y2y3y4*y4y6y7y8y10y12*y12                                               | 1290.68 | 51.007  | 93117  | 2 | 645.84  | -2.46  |
| P0A7W4 RS5_SALTY 30S ribosomal protein S5; | 4  |                       | ATIDGLENMNSPEMVAAGR                        | 138 | 19 | 12 | 92.68  | b2°b2b5b11y4y8y9y11y12y13y15y17                                               | 2046.99 | 58.931  | 70468  | 3 | 683.00  | -4.59  |
| P0A7W4 RS5_SALTY 30S ribosomal protein S5; | 5  |                       | SVEEILGK                                   | 159 | 8  | 4  | 40.86  | y3y4y6y8                                                                      | 874.48  | 50.225  | 59544  | 2 | 437.74  | -8.03  |
| P0A7W4 RS5_SALTY 30S ribosomal protein S5; | 6  |                       | ATIDGLENMNSPEMVAAG                         | 138 | 18 | 16 | 114.67 | b2°b2b11b15y2y3y4y7y10y11y12*y12y14y15y16y18                                  | 1890.90 | 63.114  | 56574  | 2 | 945.96  | 5.36   |
| P0A7W4 RS5_SALTY 30S ribosomal protein S5; | 7  |                       | AREVPAAIQK                                 | 52  | 10 | 5  | 28.66  | b6b7y2y3*y3                                                                   | 1082.63 | 28.684  | 10933  | 2 | 541.82  | -1.69  |
| P0A7W4 RS5_SALTY 30S ribosomal protein S5; | 8  |                       | IFSFTALTVVGDGNR                            | 29  | 16 | 3  | 23.69  | b7y6y7                                                                        | 1653.84 | 70.308  | 11445  | 2 | 827.42  | -11.88 |
| P0A7W4 RS5_SALTY 30S ribosomal protein S5; | 9  |                       | LIAVNR                                     | 14  | 6  | 1  | 13.62  | y4                                                                            | 685.43  | 32.803  | 6448   | 1 | 685.43  | -1.42  |

|                                            |    |                                             |                                       |     |    |    |        |                                                           |         |         |        |   |         |        |
|--------------------------------------------|----|---------------------------------------------|---------------------------------------|-----|----|----|--------|-----------------------------------------------------------|---------|---------|--------|---|---------|--------|
| P0A7W4 RS5_SALTY 30S ribosomal protein S5; | 10 |                                             | AVLEVAGVHNVLAKAYGSTNPIN VVR           | 112 | 26 | 3  | 21.91  | b3b4y12                                                   | 2691.49 | 96.717  | 192339 | 3 | 897.84  | 0.00   |
| P0A7W4 RS5_SALTY 30S ribosomal protein S5; | 11 |                                             | MAHIEKQAGELQEK                        | 0   | 14 | 5  | 27.06  | b5b6°b6b9°b9                                              | 1611.79 | 54.875  | 16455  | 2 | 806.40  | -13.71 |
| P0A7W4 RS5_SALTY 30S ribosomal protein S5; | 12 | Oxidation+M()                               | ATIDGLENMNSPEMVA AK                   | 138 | 18 | 6  | 30.97  | b6°b6b9b15y7y13                                           | 1906.91 | 82.484  | 3780   | 2 | 953.96  | 12.55  |
| P0A7W4 RS5_SALTY 30S ribosomal protein S5; | 13 | Oxidation+M(3)                              | VFMQPASEGTGIIAGGAMR                   | 93  | 19 | 3  | 14.93  | b5y5y15                                                   | 1908.94 | 60.031  | 2689   | 2 | 954.97  | 4.60   |
| Q8ZP20 TREA_SALTY Periplasmic trehalase;   | 1  |                                             | VAAAAQAHL LQPGGLATT SVK               | 428 | 21 | 16 | 108.72 | b1b2b3b4b5b9b10b11b12b14y9y10y12°y12y19y21                | 2004.11 | 57.736  | 59094  | 3 | 668.71  | -8.34  |
| Q8ZP20 TREA_SALTY Periplasmic trehalase;   | 2  |                                             | TTTIAPVDL NALLYQLEK                   | 335 | 18 | 14 | 67.54  | b1b3°b3b5°b5y1y3y4y5*y5y11y13y14y18                       | 2003.12 | 103.493 | 55755  | 2 | 1002.06 | 5.97   |
| Q8ZP20 TREA_SALTY Periplasmic trehalase;   | 3  |                                             | WMDNPQQLSTIR                          | 323 | 12 | 9  | 65.9   | b2b11y2y4y8y9y10y11y12                                    | 1488.73 | 62.381  | 45833  | 2 | 744.87  | 3.20   |
| Q8ZP20 TREA_SALTY Periplasmic trehalase;   | 4  |                                             | TFADAIPNSDPLMILADYR                   | 68  | 19 | 22 | 143.68 | b3°b3b5°b5b6°b6b11b14y2y3y4°y4y5°y5y6y7y9y10y13°y13y14y19 | 2123.07 | 101.225 | 42806  | 2 | 1062.04 | 9.54   |
| Q8ZP20 TREA_SALTY Periplasmic trehalase;   | 5  | Carbamidomethyl+C(6); Carbamidomethyl+C(12) | MLDLICPQEKPCDSVPSTRPASLS ATPTK        | 534 | 29 | 5  | 16.9   | b4°b4b6b10y14                                             | 3199.57 | 63.812  | 13562  | 4 | 800.65  | -3.43  |
| Q8ZP20 TREA_SALTY Periplasmic trehalase;   | 6  |                                             | SNPNRPATEIYR                          | 296 | 12 | 5  | 29.47  | b2y6y7y10y12                                              | 1417.72 | 32.786  | 10395  | 2 | 709.36  | 1.12   |
| Q8ZP20 TREA_SALTY Periplasmic trehalase;   | 7  |                                             | WDSLLPLPESYVVP GGR                    | 142 | 17 | 4  | 16.31  | b4b11°b11y12                                              | 1885.00 | 91.261  | 6581   | 2 | 943.00  | 6.48   |
| Q8ZP20 TREA_SALTY Periplasmic trehalase;   | 8  |                                             | TYYLSR                                | 206 | 6  | 2  | 26.84  | y3y4                                                      | 802.40  | 37.762  | 19262  | 2 | 401.71  | -5.78  |
| Q8ZP20 TREA_SALTY Periplasmic trehalase;   | 9  |                                             | DQLTAAALFLYVNAAAK                     | 405 | 18 | 7  | 26.57  | b7°b7b10°b10°b10b11y5                                     | 1877.01 | 96.806  | 12192  | 2 | 939.01  | -3.64  |
| Q8ZP20 TREA_SALTY Periplasmic trehalase;   | 10 |                                             | DTPRPESWVEDIATAK                      | 280 | 16 | 11 | 70.74  | b4°b4b5°b5b7°b7b8°b8b12b13°b13                            | 1814.89 | 111.790 | 3255   | 2 | 907.95  | -0.67  |
| Q8ZP20 TREA_SALTY Periplasmic trehalase;   | 11 |                                             | VADMVANFGYEIDA WGHIPNGNR              | 183 | 23 | 5  | 42.98  | b3b5b6b8b9                                                | 2546.23 | 123.178 | 1786   | 3 | 849.41  | 15.53  |
| Q8ZP20 TREA_SALTY Periplasmic trehalase;   | 12 | Carbamidomethyl+C(6); Carbamidomethyl+C(12) | MLDLICPQEKPCDSVPSTRPASLS ATPTKTPSAATQ | 534 | 36 | 6  | 25.53  | b3b5y8y10y11y21                                           | 3855.88 | 63.732  | 60495  | 4 | 964.72  | -4.18  |
| Q8ZP20 TREA_SALTY Periplasmic trehalase;   | 13 |                                             | NVEKWDSLLPLPESYVVP GGR                | 138 | 21 | 5  | 31.18  | b9y4y7y9y10                                               | 2355.24 | 87.961  | 55053  | 3 | 785.75  | 3.42   |
| Q8ZP20 TREA_SALTY Periplasmic trehalase;   | 14 |                                             | ASAAAGDRAK                            | 357 | 10 | 3  | 33.89  | b4b7b8                                                    | 917.47  | 54.078  | 50544  | 2 | 459.24  | -9.85  |
| Q8ZP20 TREA_SALTY Periplasmic trehalase;   | 15 |                                             | DTPRPESWVEDIATAKSNPNRPAT EIYR         | 280 | 28 | 3  | 22.72  | b4b8b9                                                    | 3213.59 | 120.929 | 18927  | 3 | 1071.87 | 0.46   |
| Q8ZP20 TREA_SALTY Periplasmic trehalase;   | 16 |                                             | LFPDQKTFADAIPNSDPLMILADY R            | 62  | 25 | 5  | 16.3   | b4b9y7°y7y13                                              | 2851.44 | 101.847 | 12266  | 3 | 951.15  | 2.40   |
| Q8ZP20 TREA_SALTY Periplasmic trehalase;   | 17 |                                             | LEDGSVLNRYWDDR                        | 266 | 14 | 3  | 19.28  | b7y5y12                                                   | 1737.82 | 71.346  | 6878   | 2 | 869.41  | -0.91  |
| Q8ZP20 TREA_SALTY Periplasmic trehalase;   | 18 |                                             | SNPNRPATEIYRDLR                       | 296 | 15 | 6  | 29.43  | b8b9b13°b13y14*y14                                        | 1801.92 | 88.224  | 3839   | 2 | 901.46  | -4.34  |
| Q8ZP20 TREA_SALTY Periplasmic trehalase;   | 19 |                                             | TFADAIPNSDPLMILADYRMQR                | 68  | 22 | 6  | 23.31  | b12°b12b17°b17b18°b18                                     | 2538.22 | 136.825 | 2281   | 2 | 1269.61 | -11.45 |
| Q8ZP20 TREA_SALTY Periplasmic trehalase;   | 20 | Oxidation+M(4)                              | VADMVANFGYEIDA WGHIPNGNR              | 183 | 23 | 6  | 24.55  | b5b8y4°y4y8y10                                            | 2562.18 | 72.851  | 13800  | 3 | 854.73  | -0.29  |
| Q8ZP20 TREA_SALTY Periplasmic trehalase;   | 21 | Oxidation+M(9)                              | SQPPFFAFMVELLAQHEGDDALK               | 212 | 23 | 4  | 13.04  | b4b7y6°y6                                                 | 2606.29 | 74.557  | 1876   | 3 | 869.43  | 10.12  |
| Q8ZP20 TREA_SALTY Periplasmic trehalase;   | 22 |                                             | PNRPATEIYR                            | 298 | 10 | 0  | 2.83   |                                                           | 1216.64 | 32.712  | 14227  | 2 | 608.83  | -0.30  |
| Q8ZP20 TREA_SALTY Periplasmic trehalase;   | 23 |                                             | TFADAIPNSDPLMILADYR                   | 68  | 19 | 0  | 5.66   |                                                           | 2106.02 | 101.197 | 1877   | 3 | 702.68  | 2.55   |



|                                              |    |                      |                                   |     |    |    |        |                                                                |         |         |        |   |         |        |
|----------------------------------------------|----|----------------------|-----------------------------------|-----|----|----|--------|----------------------------------------------------------------|---------|---------|--------|---|---------|--------|
| Q8ZP20 TREA_SALTY Periplasmic trehalase;     | 24 |                      | SNPNRPATEIYR                      | 296 | 12 | 0  | 2.83   |                                                                | 1400.67 | 32.798  | 1531   | 3 | 467.56  | -12.46 |
| Q8ZK80 RL9_SALTY 50S ribosomal protein L9;   | 1  |                      | VANLGLSGDQVNVK                    | 8   | 14 | 23 | 125.23 | b1b2b3b6°b6b9*b9b10°b10°b10b13b14y1y3y7*y7y8*y8y9y10*y10y12y14 | 1413.77 | 56.576  | 68876  | 2 | 707.39  | 1.47   |
| Q8ZK80 RL9_SALTY 50S ribosomal protein L9;   | 2  |                      | NVEYFEAR                          | 42  | 8  | 8  | 67.3   | y2y3y4y5°y5y6y7y8                                              | 1027.48 | 46.616  | 65831  | 2 | 514.24  | -5.82  |
| Q8ZK80 RL9_SALTY 50S ribosomal protein L9;   | 3  |                      | DIADAVTAAGVDVAK                   | 97  | 15 | 10 | 63.64  | b2b4b7b9y4°y4y7y9y13y15                                        | 1415.74 | 66.013  | 59415  | 2 | 708.37  | 0.17   |
| Q8ZK80 RL9_SALTY 50S ribosomal protein L9;   | 4  |                      | LADVLAANAR                        | 57  | 11 | 8  | 24.3   | b2b5y1y2y5*y5y10*y10                                           | 1084.62 | 38.311  | 29725  | 2 | 542.81  | 5.51   |
| Q8ZK80 RL9_SALTY 50S ribosomal protein L9;   | 5  |                      | VIINVVAE                          | 141 | 8  | 3  | 33.08  | b5b6y5                                                         | 856.51  | 63.390  | 69436  | 1 | 856.51  | -6.27  |
| Q8ZK80 RL9_SALTY 50S ribosomal protein L9;   | 6  |                      | NFLVPK                            | 27  | 6  | 2  | 26.84  | b3y4                                                           | 717.42  | 51.089  | 21397  | 1 | 717.42  | -11.23 |
| Q8ZK80 RL9_SALTY 50S ribosomal protein L9;   | 7  |                      | TTGEHEVNFQVHSEVFAK                | 123 | 18 | 4  | 15.58  | b12*b12y9y14                                                   | 2058.99 | 94.502  | 6805   | 3 | 687.00  | -1.42  |
| Q8ZK80 RL9_SALTY 50S ribosomal protein L9;   | 8  |                      | DIADAVTAAGVDVAKSEVR               | 97  | 19 | 4  | 34.52  | b12b13b14°b14                                                  | 1886.95 | 75.306  | 54796  | 3 | 629.66  | -14.62 |
| Q8ZK80 RL9_SALTY 50S ribosomal protein L9;   | 9  |                      | VANLGLSGDQVNVKAGYAR               | 8   | 19 | 4  | 34.52  | b9°b9b10b11                                                    | 1932.05 | 67.357  | 7803   | 2 | 966.53  | 12.00  |
| Q8ZK80 RL9_SALTY 50S ribosomal protein L9;   | 10 |                      | LPNGVLRTTGEHEVNFQVHSEVFAK         | 116 | 25 | 11 | 53.27  | b12b13*b13y11°y11*y11y12*y12y15y16°y16                         | 2808.44 | 136.814 | 3218   | 2 | 1404.72 | -0.96  |
| Q8ZK80 RL9_SALTY 50S ribosomal protein L9;   | 11 |                      | KNVEYFEAR                         | 41  | 9  | 3  | 30.48  | b6y4y8                                                         | 1155.59 | 70.418  | 2072   | 2 | 578.30  | 8.24   |
| Q8ZK80 RL9_SALTY 50S ribosomal protein L9;   | 12 | Phosphoryl STY(5)    | AVPATKK                           | 35  | 7  | 4  | 40.46  | b3b6y6°y6                                                      | 794.41  | 45.090  | 4262   | 1 | 794.41  | 2.84   |
| Q8ZK80 RL9_SALTY 50S ribosomal protein L9;   | 13 |                      | ADVLAANAR                         | 58  | 10 | 1  | 7.86   | b9                                                             | 971.52  | 38.299  | 46234  | 2 | 486.27  | -2.01  |
| P0A297 RL10_SALTY 50S ribosomal protein L10; | 1  |                      | LATLPTYEEAIAR                     | 125 | 13 | 11 | 96.93  | b2b4y4y6y7y8y9y10°y10y11y13                                    | 1447.77 | 64.950  | 75090  | 2 | 724.39  | -4.05  |
| P0A297 RL10_SALTY 50S ribosomal protein L10; | 2  | Carbamidomethyl+C(9) | VVEGTQFECLKDTFVGPTLIAYSM EHPGAAAR | 62  | 32 | 10 | 49.47  | b2b3y6y12y13y15y16°y16y17y32                                   | 3494.70 | 91.986  | 70853  | 4 | 874.43  | -3.07  |
| P0A297 RL10_SALTY 50S ribosomal protein L10; | 3  |                      | AAAFEGELIPASQIDR                  | 109 | 16 | 10 | 70.74  | b1b4b5y2y7y8y9y11y12y16                                        | 1687.87 | 68.552  | 52019  | 2 | 844.44  | 4.85   |
| P0A297 RL10_SALTY 50S ribosomal protein L10; | 4  |                      | GALSAVVADSR                       | 20  | 11 | 9  | 52.49  | b3b5°b5y2y5y6°y6y7y11                                          | 1045.57 | 48.259  | 37079  | 2 | 523.29  | 5.84   |
| P0A297 RL10_SALTY 50S ribosomal protein L10; | 5  |                      | AGREAGVYMR                        | 43  | 10 | 5  | 61.12  | b6y3y4y6y8                                                     | 1109.55 | 46.156  | 9628   | 2 | 555.28  | 2.53   |
| P0A297 RL10_SALTY 50S ribosomal protein L10; | 6  | Carbamidomethyl+C(9) | VVEGTQFECLK                       | 62  | 11 | 5  | 31.29  | b3b9b10b11y11                                                  | 1309.66 | 86.052  | 3289   | 2 | 655.33  | 12.68  |
| P0A297 RL10_SALTY 50S ribosomal protein L10; | 7  |                      | LMATMK                            | 138 | 6  | 1  | 13.62  | b4                                                             | 694.37  | 40.905  | 12415  | 1 | 694.37  | 6.86   |
| P0A297 RL10_SALTY 50S ribosomal protein L10; | 8  |                      | DTFVGPTLIAYSM EHPGAAAR            | 73  | 21 | 3  | 13.87  | b5y3y13                                                        | 2204.10 | 115.252 | 7826   | 3 | 735.37  | 9.19   |
| P0A297 RL10_SALTY 50S ribosomal protein L10; | 9  |                      | EASAGK                            | 144 | 6  | 3  | 29.85  | b3b5°b5                                                        | 562.29  | 43.602  | 2615   | 1 | 562.29  | 13.79  |
| P0A297 RL10_SALTY 50S ribosomal protein L10; | 10 |                      | LATLPTYEEAIARLMATMK               | 125 | 19 | 3  | 14.93  | b12y6y18                                                       | 2123.09 | 57.772  | 234798 | 3 | 708.37  | -14.72 |
| P0A297 RL10_SALTY 50S ribosomal protein L10; | 11 |                      | AAAFEGELIPASQIDRLATLPTYEEAIAR     | 109 | 29 | 8  | 33.3   | b9b11b13°b13*b13b18b25y9                                       | 3116.59 | 99.848  | 5800   | 3 | 1039.53 | -12.06 |
| P0A297 RL10_SALTY 50S ribosomal protein L10; | 12 | Phosphoryl STY(4)    | GALSAVVADSR                       | 20  | 11 | 3  | 24.3   | b3y6y10                                                        | 1125.51 | 40.209  | 11617  | 2 | 563.26  | -11.93 |
| P0A297 RL10_SALTY 50S ribosomal protein L10; | 13 | Oxidation+M(2)       | LMATMKEASAGK                      | 138 | 12 | 3  | 26.25  | b6b7y8                                                         | 1253.61 | 61.352  | 15212  | 3 | 418.54  | -9.15  |

|                                           |    |                       |                                   |     |    |    |        |                                                                                  |         |         |        |   |         |        |
|-------------------------------------------|----|-----------------------|-----------------------------------|-----|----|----|--------|----------------------------------------------------------------------------------|---------|---------|--------|---|---------|--------|
| Q8ZQT5 TOLB_SALTY Protein tolB;           | 1  |                       | SNNTEPTWFPDSQTLAFTSDQAG<br>RPQVYK | 287 | 29 | 15 | 77.34  | b2b4b5°b5y2y1y14y16y2<br>0y21y22y24°y24y25y29                                    | 3285.56 | 77.421  | 98276  | 3 | 1095.86 | 4.46   |
| Q8ZQT5 TOLB_SALTY Protein tolB;           | 2  |                       | WAGPGAAPEDIGGIVAADLR              | 43  | 20 | 12 | 66.83  | b1b7b15b17°b17y2y4y5y6<br>y13y14y20                                              | 1936.00 | 85.314  | 66345  | 2 | 968.50  | 4.16   |
| Q8ZQT5 TOLB_SALTY Protein tolB;           | 3  |                       | IEITQGVSARPIGVVPFK                | 24  | 19 | 14 | 92.73  | b2b9b11b12°b12b15b16y3<br>y14°y14y15y16y17y19                                    | 2026.11 | 70.368  | 63384  | 3 | 676.04  | -11.63 |
| Q8ZQT5 TOLB_SALTY Protein tolB;           | 4  |                       | LAYVTFESGR                        | 213 | 10 | 6  | 51.88  | b1y4y5y6y8y10                                                                    | 1142.58 | 57.526  | 46940  | 2 | 571.79  | -3.10  |
| Q8ZQT5 TOLB_SALTY Protein tolB;           | 5  |                       | SPQPLMSPAWSPDGSK                  | 197 | 16 | 12 | 85     | b2°b2b9y3y4y5y9°y9y10y1<br>3y14y16                                               | 1684.81 | 62.580  | 41529  | 2 | 842.91  | 8.62   |
| Q8ZQT5 TOLB_SALTY Protein tolB;           | 6  |                       | IAYVVQTNGGQFPYELR                 | 166 | 17 | 8  | 52.74  | b3b4y2y5y8y11y13°y13                                                             | 1955.01 | 73.143  | 35772  | 2 | 978.01  | 5.93   |
| Q8ZQT5 TOLB_SALTY Protein tolB;           | 7  |                       | SALVIQTLANGAVR                    | 223 | 14 | 9  | 89.55  | b3b4y4y5y8y9y10y11y14                                                            | 1412.82 | 70.689  | 34021  | 2 | 706.91  | -2.42  |
| Q8ZQT5 TOLB_SALTY Protein tolB;           | 8  |                       | MNINGGAAQR                        | 316 | 10 | 11 | 87.55  | b2°b2b3y2y3y5y6y7°y7y8<br>y9                                                     | 1031.50 | 27.876  | 30874  | 2 | 516.25  | -8.76  |
| Q8ZQT5 TOLB_SALTY Protein tolB;           | 9  |                       | LPATDGQVK                         | 413 | 9  | 7  | 45.46  | b5b9y4y5y8°y8y9                                                                  | 928.51  | 27.975  | 1915   | 1 | 928.51  | 3.62   |
| Q8ZQT5 TOLB_SALTY Protein tolB;           | 10 |                       | YAGHTASDEVFEK                     | 142 | 13 | 4  | 20.63  | b5°b5b10y9                                                                       | 1453.64 | 37.606  | 24339  | 3 | 485.22  | -13.35 |
| Q8ZQT5 TOLB_SALTY Protein tolB;           | 11 |                       | QVASFPR                           | 237 | 7  | 3  | 40.46  | y3y4y5                                                                           | 804.43  | 38.354  | 22141  | 2 | 402.72  | -9.94  |
| Q8ZQT5 TOLB_SALTY Protein tolB;           | 12 |                       | LAFALSK                           | 257 | 7  | 3  | 37.45  | b4y5y6                                                                           | 749.45  | 56.362  | 10014  | 2 | 375.23  | -12.46 |
| Q8ZQT5 TOLB_SALTY Protein tolB;           | 13 |                       | HNGAPAFSPDGTK                     | 244 | 13 | 8  | 74.96  | b5b6b7°b7y4y5y6y9                                                                | 1298.62 | 67.191  | 4627   | 2 | 649.81  | 3.10   |
| Q8ZQT5 TOLB_SALTY Protein tolB;           | 14 |                       | FNPLDR                            | 67  | 6  | 1  | 13.62  | b4                                                                               | 761.38  | 37.365  | 3078   | 2 | 381.20  | -14.51 |
| Q8ZQT5 TOLB_SALTY Protein tolB;           | 15 |                       | ITWEGSQNQDADVSSDGK                | 326 | 18 | 3  | 15.58  | b11y5y11                                                                         | 1936.89 | 65.519  | 1657   | 2 | 968.95  | 19.66  |
| Q8ZQT5 TOLB_SALTY Protein tolB;           | 16 |                       | SPQPLMSPAWSPDGSKLAYVTFES<br>GR    | 197 | 26 | 6  | 49.93  | b8b9y4y5y6y13                                                                    | 2808.37 | 80.926  | 39400  | 3 | 936.80  | 1.56   |
| Q8ZQT5 TOLB_SALTY Protein tolB;           | 17 |                       | NSGKFNPLDR                        | 63  | 10 | 3  | 33.89  | y5y6y8                                                                           | 1147.57 | 41.952  | 18936  | 2 | 574.29  | -12.98 |
| Q8ZQT5 TOLB_SALTY Protein tolB;           | 18 |                       | LPATDGQVKSPAWSPYL                 | 413 | 17 | 3  | 16.31  | b3b6y6                                                                           | 1829.92 | 119.570 | 8950   | 2 | 915.46  | -12.34 |
| Q8ZQT5 TOLB_SALTY Protein tolB;           | 19 |                       | HNGAPAFSPDGTKLAFALSK              | 244 | 20 | 3  | 23.79  | b5b8b9                                                                           | 2029.05 | 61.718  | 6488   | 3 | 677.02  | -0.42  |
| Q8ZQT5 TOLB_SALTY Protein tolB;           | 20 |                       | QALRVAFGFLMLWAAVLHAEVR            | 2   | 22 | 6  | 51.2   | b12b14b15y16y17y18                                                               | 2498.39 | 136.839 | 3334   | 2 | 1249.70 | 2.05   |
| Q8ZQT5 TOLB_SALTY Protein tolB;           | 21 |                       | VIQTLANGAVR                       | 226 | 11 | 0  | 3.64   |                                                                                  | 1141.65 | 70.725  | 18705  | 2 | 571.33  | -12.94 |
| O33921 AGP_SALTY Glucose-1-<br>phohatase; | 1  |                       | TPIGGQLVFQR                       | 335 | 11 | 7  | 65.5   | b2y3y4y7y8y9y11                                                                  | 1215.68 | 61.356  | 161176 | 2 | 608.34  | -6.83  |
| O33921 AGP_SALTY Glucose-1-<br>phohatase; | 2  |                       | MGTMDPTEFNPVITDDSAAFR             | 141 | 20 | 21 | 137.51 | b2b3°b3b5°b5y2y3y5°y5y6<br>y7y8y9°y9y11y12y14°y14y<br>15y16y20                   | 2186.01 | 78.235  | 94338  | 2 | 1093.51 | 7.37   |
| O33921 AGP_SALTY Glucose-1-<br>phohatase; | 3  |                       | IEYVYQSAR                         | 358 | 9  | 9  | 89.37  | b2b3b6y3y5y6y7y8y9                                                               | 1128.56 | 42.584  | 82251  | 2 | 564.79  | -3.89  |
| O33921 AGP_SALTY Glucose-1-<br>phohatase; | 4  |                       | NVAAPLVK                          | 281 | 8  | 5  | 49.31  | b5y4y5y6y8                                                                       | 811.49  | 40.155  | 80453  | 2 | 406.25  | -12.41 |
| O33921 AGP_SALTY Glucose-1-<br>phohatase; | 5  |                       | QQAQAMEK                          | 161 | 9  | 12 | 74.9   | b3°b3b9y3y4°y4y5°y5°y5y<br>6y7y9                                                 | 1032.50 | 26.249  | 70025  | 2 | 516.76  | -9.46  |
| O33921 AGP_SALTY Glucose-1-<br>phohatase; | 6  | Carbamidomethyl-C(14) | EWLVQAQLIPSGECPAPDVTYAY<br>ANSLQR | 87  | 29 | 26 | 152.26 | b3°b3b4b6b7°b7b9°b9b12<br>b16y2y3y4y5°y5y6y7y9y1<br>0y11y13°y13°y13y15y20y2<br>9 | 3205.58 | 93.585  | 47906  | 3 | 1069.20 | 5.79   |

|                                              |    |                                                |                                                |     |    |    |        |                                                              |         |         |        |   |         |        |
|----------------------------------------------|----|------------------------------------------------|------------------------------------------------|-----|----|----|--------|--------------------------------------------------------------|---------|---------|--------|---|---------|--------|
| O33921 AGP_SALTY Glucose-1-phohatase;        | 7  |                                                | APLANNGSVLAQSTPNAWPAWD<br>VPGGQLTTK            | 43  | 31 | 18 | 92.81  | b4b6b8b9°b9b14*b14b18y<br>2y8y10y11y12*y12y13y14<br>*y14y31  | 3161.61 | 83.345  | 39926  | 3 | 1054.54 | 3.63   |
| O33921 AGP_SALTY Glucose-1-phohatase;        | 8  |                                                | DTFSANYQQEPGVQGPLK                             | 208 | 18 | 7  | 22.74  | b2°b2y1y8y10y12y18                                           | 1978.97 | 56.473  | 33532  | 2 | 989.99  | 7.90   |
| O33921 AGP_SALTY Glucose-1-phohatase;        | 9  |                                                | NGYQDSLFTSPTVAR                                | 266 | 15 | 4  | 26.21  | b2y3y5y11                                                    | 1655.80 | 62.918  | 27539  | 2 | 828.40  | -1.62  |
| O33921 AGP_SALTY Glucose-1-phohatase;        | 10 |                                                | VGNSLVDAFTLQYYEGFPMQVA<br>WGGIHTDR             | 226 | 31 | 6  | 26.13  | b3b6b7b15°b15*b15                                            | 3486.66 | 104.156 | 25620  | 3 | 1162.89 | 5.46   |
| O33921 AGP_SALTY Glucose-1-phohatase;        | 11 |                                                | VTVLVGHDNSNIASLLTALDFKPYQ<br>LHDQYER           | 304 | 31 | 5  | 25.2   | b9y4y5y10y15                                                 | 3542.77 | 96.058  | 171470 | 5 | 709.36  | -15.30 |
| O33921 AGP_SALTY Glucose-1-phohatase;        | 12 |                                                | NAEALTLK                                       | 370 | 8  | 5  | 51.07  | b3*b3b5y6y7                                                  | 859.48  | 41.138  | 85461  | 2 | 430.24  | -15.20 |
| O33921 AGP_SALTY Glucose-1-phohatase;        | 13 |                                                | SQLHLDSEYK                                     | 172 | 10 | 5  | 28.66  | b4°b4b5y4°y4                                                 | 1219.58 | 40.916  | 20789  | 3 | 407.20  | -14.71 |
| O33921 AGP_SALTY Glucose-1-phohatase;        | 14 | Carbamidomethyl+C(2);<br>Carbamidomethyl+C(10) | GCPVDANGFCPLDKFDNMNTA<br>AK                    | 389 | 24 | 9  | 56.8   | b4b22y3y10y12*y12y14y1<br>8y22                               | 2641.18 | 78.262  | 71975  | 3 | 881.07  | -0.74  |
| O33921 AGP_SALTY Glucose-1-phohatase;        | 15 |                                                | LKNGYQDSLFTSPTVAR                              | 264 | 17 | 10 | 84.05  | b7b9b10°b10y3y4y5y6y8y<br>15                                 | 1896.96 | 58.786  | 70510  | 3 | 632.99  | -8.88  |
| O33921 AGP_SALTY Glucose-1-phohatase;        | 16 |                                                | MGTMDPTFNPVITDDSAFRQQA<br>VQAMEK               | 141 | 29 | 6  | 25.98  | b3y3y4°y4y7y24                                               | 3199.50 | 81.574  | 32009  | 3 | 1067.17 | 4.88   |
| O33921 AGP_SALTY Glucose-1-phohatase;        | 17 |                                                | VGNSLVDAFTLQYYEGFPMQVA<br>WGGIHTDRQWK          | 226 | 34 | 6  | 21.51  | b13*b13y7y8y12*y12                                           | 3928.87 | 84.054  | 26913  | 3 | 1310.29 | -2.49  |
| O33921 AGP_SALTY Glucose-1-phohatase;        | 18 |                                                | QQAVQAMEKAR                                    | 161 | 11 | 4  | 41.49  | b4y4y8y10                                                    | 1259.66 | 63.718  | 16963  | 2 | 630.33  | 4.55   |
| O33921 AGP_SALTY Glucose-1-phohatase;        | 19 | Carbamidomethyl+C(27)<br>;Oxidation+M(8)       | GGVLEVYMGHYTREWLVAQGLIP<br>SGECPAPDTVYAYANSLQR | 74  | 42 | 3  | 10.94  | b8b11y4                                                      | 4684.29 | 57.644  | 5434   | 4 | 1171.83 | 6.36   |
| P41031 CY_SALTY Thiosulfate-binding protein; | 1  |                                                | AYLNWLYSPQAQTIIHHYYR                           | 265 | 21 | 18 | 137.91 | b2b3b4b5*b5b6*b6y1y3y4<br>y5y7y9y11y13y15y16y21              | 2664.33 | 92.929  | 181927 | 3 | 888.78  | 0.64   |
| P41031 CY_SALTY Thiosulfate-binding protein; | 2  |                                                | GLGDVLISFESEVNNIRK                             | 208 | 18 | 12 | 62.21  | b2b5°b5b10b12b14°b14y6<br>y11y12y16y18                       | 1990.04 | 101.166 | 160070 | 3 | 664.02  | -10.49 |
| P41031 CY_SALTY Thiosulfate-binding protein; | 3  |                                                | FGSWPEVMK                                      | 311 | 9  | 7  | 45.46  | b2b3°b3y2y3y5y6                                              | 1080.51 | 68.505  | 150774 | 2 | 540.76  | -4.41  |
| P41031 CY_SALTY Thiosulfate-binding protein; | 4  |                                                | ELFAALNPPEQQWAK                                | 37  | 16 | 19 | 94.82  | b5b7°b7b14°b14*b14b15°<br>b15y1y2y4*y4y6°y6y7y9y1<br>0y12y16 | 1888.97 | 89.613  | 98826  | 2 | 944.99  | 6.53   |
| P41031 CY_SALTY Thiosulfate-binding protein; | 5  |                                                | QYEAQGFEEVIPK                                  | 226 | 13 | 19 | 102.65 | b2*b2b3*b3b4°b4*b4b11°<br>b11b13y1y2y3y5y8y9y10y<br>11y13    | 1507.78 | 69.700  | 95063  | 2 | 754.39  | -0.57  |
| P41031 CY_SALTY Thiosulfate-binding protein; | 6  |                                                | VNNPEIMGK                                      | 286 | 9  | 10 | 61.68  | b1b2°b2b3y2y4y6y7y8y9                                        | 1001.50 | 36.114  | 94183  | 2 | 501.25  | -9.81  |
| P41031 CY_SALTY Thiosulfate-binding protein; | 7  |                                                | LPNNSPFYSTMGFLVR                               | 110 | 17 | 16 | 122.46 | b6°b6b7b8°b8y1y2y3y5y8<br>y9y11y12y13y14y17                  | 1929.97 | 91.691  | 91611  | 2 | 965.49  | 7.46   |
| P41031 CY_SALTY Thiosulfate-binding protein; | 8  |                                                | NVEFDTGGR                                      | 189 | 10 | 8  | 58.11  | b2b8y4y6y7y8°y8y10                                           | 1093.52 | 47.125  | 63117  | 2 | 547.26  | -4.35  |
| P41031 CY_SALTY Thiosulfate-binding protein; | 9  |                                                | NIHDWSDLVR                                     | 132 | 10 | 7  | 26.9   | b2b8y1y3y6°y6y10                                             | 1254.62 | 63.090  | 60328  | 2 | 627.81  | -0.78  |
| P41031 CY_SALTY Thiosulfate-binding protein; | 10 |                                                | LIFPNPK                                        | 146 | 7  | 9  | 63.88  | b5y2y3*y3y4*y4y5y6y7                                         | 828.49  | 55.872  | 60096  | 2 | 414.75  | -14.37 |
| P41031 CY_SALTY Thiosulfate-binding protein; | 11 |                                                | QALAILQLK                                      | 71  | 10 | 8  | 74.33  | b3°b3b10y3y5y6y7y8                                           | 1054.65 | 74.840  | 46161  | 2 | 527.83  | -9.95  |
| P41031 CY_SALTY Thiosulfate-binding protein; | 12 |                                                | GATTTFAER                                      | 199 | 9  | 5  | 54.49  | y4y5y6y7y9                                                   | 953.46  | 30.737  | 31056  | 2 | 477.23  | -11.20 |
| P41031 CY_SALTY Thiosulfate-binding protein; | 13 |                                                | GLGDVLISFESEVNNIR                              | 208 | 17 | 5  | 23.3   | b5y1y10*y10y11                                               | 1861.97 | 106.998 | 29419  | 2 | 931.49  | 2.16   |

|                                               |    |                   |                                |     |    |    |        |                                                         |         |         |        |   |         |        |
|-----------------------------------------------|----|-------------------|--------------------------------|-----|----|----|--------|---------------------------------------------------------|---------|---------|--------|---|---------|--------|
| [P41031 CY_SALTY Thiosulfate-binding protein; | 14 |                   | ADVVTYNQVTDVQILHDK             | 81  | 18 | 6  | 22.74  | b2°b2b3°b3b10b12                                        | 2058.04 | 63.600  | 8958   | 3 | 686.68  | -5.81  |
| [P41031 CY_SALTY Thiosulfate-binding protein; | 15 |                   | ELFAALNPPFEQQWAKDNGGDK         | 37  | 22 | 6  | 24.22  | b15y2y7y13°y13y14                                       | 2475.18 | 97.084  | 2693   | 3 | 825.73  | -6.41  |
| [P41031 CY_SALTY Thiosulfate-binding protein; | 16 |                   | TNLAIEFPVAWVDK                 | 239 | 14 | 5  | 44.75  | y5y7y9y11°y11                                           | 1602.84 | 97.042  | 7221   | 2 | 801.93  | -5.18  |
| [P41031 CY_SALTY Thiosulfate-binding protein; | 17 |                   | RPLTLAAMLLLAGQAQATELLNS SYDVSR | 8   | 29 | 16 | 76.67  | b11b18°b18b19y12*y12y13y14°y14*y14y15*y15y16y18°y18*y18 | 3102.61 | 136.800 | 5936   | 2 | 1551.81 | -15.50 |
| [P41031 CY_SALTY Thiosulfate-binding protein; | 18 |                   | TEQFMTQFLK                     | 179 | 10 | 7  | 73.54  | b3b9y3y5y7y8°y8                                         | 1272.63 | 75.258  | 4203   | 1 | 1272.63 | -1.82  |
| [P41031 CY_SALTY Thiosulfate-binding protein; | 19 |                   | VEEK                           | 307 | 4  | 1  | 12.81  | b3                                                      | 504.27  | 46.446  | 3781   | 1 | 504.27  | 1.15   |
| [P41031 CY_SALTY Thiosulfate-binding protein; | 20 |                   | TNLAIEFPVAWVDKNVQANGTEK        | 239 | 23 | 17 | 132.25 | b3b4b5°b5y5y6°y6y7*y7y9y10*y10y13y17y18y19y20           | 2544.30 | 90.353  | 194803 | 3 | 848.77  | -4.13  |
| [P41031 CY_SALTY Thiosulfate-binding protein; | 21 |                   | NVEVFDTGGRGATTTFATER           | 189 | 19 | 14 | 100.01 | b3°b3b5b8b12°b12b14y5y8y13°y13y14y15y17                 | 2027.96 | 56.513  | 62103  | 3 | 676.66  | -7.76  |
| [P41031 CY_SALTY Thiosulfate-binding protein; | 22 |                   | YTYLAAWGAADNADGGDKAK           | 159 | 20 | 3  | 21.16  | y3y6y13                                                 | 2057.95 | 61.984  | 61848  | 3 | 686.65  | -5.10  |
| [P41031 CY_SALTY Thiosulfate-binding protein; | 23 |                   | TSGNARYTYLAAWGAADNADGGDK       | 153 | 24 | 4  | 19.44  | b8b10b13y15                                             | 2445.13 | 90.423  | 6637   | 2 | 1223.07 | 10.18  |
| [P41031 CY_SALTY Thiosulfate-binding protein; | 24 |                   | GNPKNIHDWSDLVR                 | 128 | 14 | 3  | 27.85  | y7y9y13                                                 | 1650.81 | 84.784  | 5487   | 3 | 550.94  | -14.12 |
| [P41031 CY_SALTY Thiosulfate-binding protein; | 25 |                   | LIPADWQSRLPNNSSPFYSTMGFLVR     | 101 | 26 | 4  | 12.14  | b21y10°y10y13                                           | 2996.51 | 84.731  | 4873   | 3 | 999.51  | 0.73   |
| [P41031 CY_SALTY Thiosulfate-binding protein; | 26 |                   | QADKFPQTELFRR                  | 295 | 12 | 4  | 35.49  | y4y5y6°y6                                               | 1479.75 | 58.955  | 4248   | 2 | 740.38  | -5.53  |
| [P41031 CY_SALTY Thiosulfate-binding protein; | 27 |                   | VEEKFGSWPEVMK                  | 307 | 13 | 4  | 34.43  | b4b5y4y8                                                | 1565.75 | 46.658  | 2285   | 2 | 783.38  | -11.46 |
| [P41031 CY_SALTY Thiosulfate-binding protein; | 28 |                   | VNNPEIMGKQADK                  | 286 | 13 | 3  | 20.63  | b3b11y9                                                 | 1443.74 | 76.664  | 1756   | 2 | 722.37  | 6.43   |
| [P41031 CY_SALTY Thiosulfate-binding protein; | 29 | Phosphoryl STY(6) | ADVVTYNQVTDVQILHDK             | 81  | 18 | 5  | 29.14  | b4b5°b5y13_H3PO4y13y16                                  | 2138.04 | 69.025  | 13547  | 3 | 713.35  | 13.93  |
| [P41031 CY_SALTY Thiosulfate-binding protein; | 30 |                   | EVFDTGGR                       | 191 | 8  | 0  | 2.02   |                                                         | 880.41  | 47.099  | 1676   | 1 | 880.41  | -3.40  |
| [P41031 CY_SALTY Thiosulfate-binding protein; | 31 |                   | GATTTFAER                      | 199 | 9  | 0  | 1.62   |                                                         | 935.45  | 30.742  | 11884  | 2 | 468.23  | -3.78  |
| [P41031 CY_SALTY Thiosulfate-binding protein; | 32 |                   | FGSWPEVMK                      | 311 | 9  | 0  | 1.62   |                                                         | 1062.51 | 68.562  | 3819   | 1 | 1062.51 | 10.23  |
| [P41031 CY_SALTY Thiosulfate-binding protein; | 33 |                   | NIHDWSDLVR                     | 132 | 10 | 1  | 8.25   | y4                                                      | 1237.59 | 63.097  | 3496   | 3 | 413.20  | 1.18   |
| [P67091 UF_SALTY Universal stress protein F;  | 1  |                   | TILVPIDISDSELTQR               | 3   | 16 | 21 | 135.07 | b1b2b3°b3b4°b4y2*y2y3y5°y5*y5y7y8y9y10y12y13°y13y14y16  | 1799.98 | 81.861  | 133178 | 2 | 900.49  | 2.71   |
| [P67091 UF_SALTY Universal stress protein F;  | 2  |                   | VISHVEAEAK                     | 19  | 10 | 3  | 36.9   | y5y6y7                                                  | 1082.58 | 25.079  | 24740  | 2 | 541.79  | -4.51  |
| [P67091 UF_SALTY Universal stress protein F;  | 3  |                   | VHFLTVPISLPYYASLGLAYSALPAMDDLK | 34  | 31 | 6  | 39.96  | y1y4y7y9y10y11                                          | 3394.77 | 125.702 | 3511   | 3 | 1132.26 | 0.65   |
| [P67091 UF_SALTY Universal stress protein F;  | 4  |                   | ILEMAK                         | 98  | 6  | 1  | 13.62  | y4                                                      | 704.40  | 38.381  | 6797   | 2 | 352.70  | -8.66  |
| [P67091 UF_SALTY Universal stress protein F;  | 5  |                   | VQAHVAEGSPK                    | 85  | 11 | 3  | 24.3   | b6b10y5                                                 | 1122.58 | 69.549  | 2127   | 2 | 561.80  | -5.76  |
| [P67091 UF_SALTY Universal stress protein F;  | 6  |                   | MNRTILVPIDISDSELTQR            | 0   | 19 | 3  | 34.52  | y8y9y10                                                 | 2201.16 | 68.895  | 2812   | 2 | 1101.08 | -0.22  |

|                                         |    |                                       |                                |     |    |    |        |                                                               |         |         |        |   |         |        |
|-----------------------------------------|----|---------------------------------------|--------------------------------|-----|----|----|--------|---------------------------------------------------------------|---------|---------|--------|---|---------|--------|
| P65702 PGK_SALTY Phohoglycerate kinase; | 1  |                                       | SVNDVKEDEQILDIGDASAQQLAELK     | 272 | 27 | 23 | 152.37 | b1b4°b4b5°b5b11b13b14°b14b17b25b26y2y3y4°y4y5y6y7y13y14y15y27 | 2941.52 | 99.963  | 162667 | 3 | 981.18  | 5.81   |
| P65702 PGK_SALTY Phohoglycerate kinase; | 2  |                                       | VLPVAMLEER                     | 373 | 11 | 12 | 87.16  | b1b3y2y3°y3y4y6y7y8°y8y9y11                                   | 1227.67 | 79.922  | 161940 | 2 | 614.34  | -5.67  |
| P65702 PGK_SALTY Phohoglycerate kinase; | 3  | Carbamidomethyl+C(6)                  | FADVACAGPLLAELDALGK            | 156 | 20 | 19 | 168.75 | b2b3b5b7b8b12b13y2y3y4y5y6y8y9y13y14y15y16y20                 | 2002.04 | 98.698  | 161686 | 2 | 1001.52 | 4.94   |
| P65702 PGK_SALTY Phohoglycerate kinase; | 4  | Carbamidomethyl+C(5)                  | LLTTCDIPVPTDVR                 | 244 | 14 | 15 | 95.57  | b2b6°b6b7°b7b9y2y5°y5y7y9y10y11y12y14                         | 1599.85 | 68.493  | 118680 | 2 | 800.43  | 2.75   |
| P65702 PGK_SALTY Phohoglycerate kinase; | 5  |                                       | VATEFSETAPATLK                 | 258 | 14 | 18 | 152.24 | b2b3°b3b4°b4b5b9y1y3y5y7y9y10y11°y11y12y13y14                 | 1464.76 | 52.477  | 98684  | 2 | 732.88  | -1.75  |
| P65702 PGK_SALTY Phohoglycerate kinase; | 6  |                                       | TILWNGPVGVFEPNFR               | 302 | 17 | 17 | 112.92 | b2b5b6°b6b12y1y4y5y6y7y11°y11y12y13°y13y15y17                 | 1993.05 | 106.027 | 83609  | 2 | 997.03  | 8.15   |
| P65702 PGK_SALTY Phohoglycerate kinase; | 7  |                                       | ADLNVPVKEGK                    | 19  | 11 | 12 | 66.96  | b2°b2b3b9y2y3y4°y4y6y8*y8y11                                  | 1169.65 | 36.834  | 73826  | 2 | 585.33  | -3.24  |
| P65702 PGK_SALTY Phohoglycerate kinase; | 8  |                                       | ASLPTIELALK                    | 38  | 11 | 5  | 31.29  | y1y3y4y8y11                                                   | 1155.69 | 77.090  | 65205  | 2 | 578.35  | -6.13  |
| P65702 PGK_SALTY Phohoglycerate kinase; | 9  |                                       | LVKDYLDGVDVAEGELVLENVR         | 90  | 23 | 3  | 23.13  | y3y4y12                                                       | 2544.36 | 96.950  | 42488  | 3 | 848.79  | 0.10   |
| P65702 PGK_SALTY Phohoglycerate kinase; | 10 |                                       | IADQLIVGGGIANTFVAAQGHSVGK      | 206 | 25 | 11 | 54.29  | b2b3b4b5y2y5°y5y9y11y14*y14                                   | 2423.28 | 77.950  | 41713  | 3 | 808.43  | -9.77  |
| P65702 PGK_SALTY Phohoglycerate kinase; | 11 |                                       | MTDLDLAGKR                     | 5   | 10 | 8  | 81.32  | b2y3y4y5y6y7y9y10                                             | 1119.58 | 42.686  | 34482  | 2 | 560.29  | -5.89  |
| P65702 PGK_SALTY Phohoglycerate kinase; | 12 |                                       | TILWNGPVGVFEPNFRK              | 302 | 18 | 8  | 26.57  | b2b13y1y10y13y14°y14y18                                       | 2121.12 | 96.495  | 24833  | 3 | 707.71  | -5.87  |
| P65702 PGK_SALTY Phohoglycerate kinase; | 13 |                                       | MTDLDLAGK                      | 5   | 9  | 5  | 38.26  | y2y3y4y8y9                                                    | 963.47  | 48.320  | 21214  | 2 | 482.24  | -8.17  |
| P65702 PGK_SALTY Phohoglycerate kinase; | 14 |                                       | AQASTHGIGK                     | 146 | 10 | 8  | 40.12  | b2°b2b6y2y4y7y8y10                                            | 969.50  | 15.982  | 7711   | 2 | 485.26  | -6.86  |
| P65702 PGK_SALTY Phohoglycerate kinase; | 15 |                                       | VMVTSHLGRPTEGEYNEEFSLLPV VNYLK | 53  | 29 | 5  | 16.9   | b4b6°b6b13y15                                                 | 3321.69 | 136.288 | 2766   | 4 | 831.18  | 3.68   |
| P65702 PGK_SALTY Phohoglycerate kinase; | 16 | Carbamidomethyl+C(5)                  | YAALCDVFMDFAGTAHR              | 128 | 18 | 3  | 24.5   | b6b11b12                                                      | 2043.96 | 62.989  | 12123  | 2 | 1022.48 | 9.26   |
| P65702 PGK_SALTY Phohoglycerate kinase; | 17 |                                       | LSNPVR                         | 84  | 6  | 2  | 29.85  | y3y5                                                          | 685.39  | 27.742  | 5031   | 2 | 343.20  | -11.04 |
| P65702 PGK_SALTY Phohoglycerate kinase; | 18 |                                       | SVNDVK                         | 272 | 6  | 1  | 13.62  | b4                                                            | 661.35  | 106.657 | 2507   | 1 | 661.35  | 3.97   |
| P65702 PGK_SALTY Phohoglycerate kinase; | 19 |                                       | ISYISTGGGAFLEFVEGK             | 355 | 18 | 3  | 24.5   | b3b5b6                                                        | 1874.99 | 61.904  | 2453   | 2 | 938.00  | 20.83  |
| P65702 PGK_SALTY Phohoglycerate kinase; | 20 |                                       | DYLDGVDVAEGELVLENVR            | 93  | 20 | 4  | 22.5   | b13b14y16°y16                                                 | 2204.09 | 95.413  | 1777   | 3 | 735.37  | -7.64  |
| P65702 PGK_SALTY Phohoglycerate kinase; | 21 |                                       | SLYEADLVDEAK                   | 231 | 12 | 5  | 54.15  | b7b8y9y10y11                                                  | 1352.65 | 136.272 | 1742   | 1 | 1352.65 | -5.87  |
| P65702 PGK_SALTY Phohoglycerate kinase; | 22 |                                       | VATEFSETAPATLKSVNDVK           | 258 | 20 | 3  | 22.5   | b13b14y15                                                     | 2107.09 | 74.564  | 28543  | 3 | 703.04  | 1.04   |
| P65702 PGK_SALTY Phohoglycerate kinase; | 23 |                                       | ISYISTGGGAFLEFVEGKVLPVAMLEER   | 355 | 29 | 9  | 37.81  | b4b8b10°b10b14y4y7°y7y8                                       | 3083.61 | 136.319 | 3979   | 4 | 771.66  | 0.48   |
| P65702 PGK_SALTY Phohoglycerate kinase; | 24 | Carbamidomethyl+C(5); Oxidation+M(10) | YAALCDVFMDFAGTAHR              | 128 | 18 | 4  | 24.81  | b5b7b14y11                                                    | 2059.95 | 78.116  | 2057   | 3 | 687.32  | 7.59   |
| P65702 PGK_SALTY Phohoglycerate kinase; | 25 |                                       | DLDLAGKR                       | 7   | 8  | 2  | 20.68  | b3b7                                                          | 887.50  | 42.653  | 16435  | 2 | 444.25  | 6.74   |
| P65702 PGK_SALTY Phohoglycerate kinase; | 26 |                                       | TDLDLAGKR                      | 6   | 9  | 0  | 2.02   |                                                               | 988.54  | 42.707  | 14491  | 2 | 494.77  | -5.12  |

|                                         |    |                       |                               |     |    |    |        |                                                    |         |         |        |   |         |        |
|-----------------------------------------|----|-----------------------|-------------------------------|-----|----|----|--------|----------------------------------------------------|---------|---------|--------|---|---------|--------|
| P65702 PGK_SALTY Phohoglycerate kinase; | 27 |                       | DLNVPVKEGK                    | 20  | 10 | 2  | 7.86   | b3°b3                                              | 1098.61 | 36.834  | 10931  | 2 | 549.81  | -8.22  |
| P65702 PGK_SALTY Phohoglycerate kinase; | 28 |                       | PAVAMLEER                     | 375 | 9  | 2  | 18.86  | b3b5                                               | 1015.51 | 79.922  | 7786   | 2 | 508.26  | -10.34 |
| P06179 FLIC_SALTY Flagellin;            | 1  |                       | AQILQQAGTSVLAQANQVPQNVLSLLR   | 468 | 27 | 20 | 106.92 | b2*b2b3b4b5*b5b7b8b17b18y1y2y4y6y9y10y12*y12y13y27 | 2860.60 | 104.953 | 132071 | 3 | 954.21  | 0.51   |
| P06179 FLIC_SALTY Flagellin;            | 2  |                       | SQSALGTAIER                   | 20  | 11 | 9  | 41.49  | b2*b2b3y1y5y7y9°y9y11                              | 1132.59 | 41.984  | 45416  | 2 | 566.80  | -6.25  |
| P06179 FLIC_SALTY Flagellin;            | 3  |                       | FNSAITNLGNTVNNLTSAR           | 432 | 19 | 12 | 50.03  | b3b4°b4b8°b8y3y7*y7y13y14°y14y19                   | 2007.04 | 78.164  | 32657  | 2 | 1004.02 | 5.78   |
| P06179 FLIC_SALTY Flagellin;            | 4  |                       | INSAKDDAAGQAIANR              | 37  | 16 | 11 | 65.76  | b2b9°b9y3y4y5y7*y7y10y11y16                        | 1614.80 | 30.181  | 30742  | 3 | 538.94  | -12.78 |
| P06179 FLIC_SALTY Flagellin;            | 5  |                       | VSGQTQFNGVK                   | 125 | 11 | 8  | 36.72  | b10y3y9°y9y10°y10*y10y11                           | 1164.60 | 33.207  | 21905  | 2 | 582.80  | -3.04  |
| P06179 FLIC_SALTY Flagellin;            | 6  |                       | VRELAVQSANSTNSQSDLSIQAEITQR   | 91  | 28 | 3  | 11.7   | b3y3y9                                             | 3060.54 | 66.837  | 16127  | 3 | 1020.85 | 7.98   |
| P06179 FLIC_SALTY Flagellin;            | 7  |                       | VSDTAATVTGYADTTIALDNSTFK      | 180 | 24 | 7  | 19.44  | b6°b6b10b15°b15y8y24                               | 2462.17 | 71.311  | 14507  | 3 | 821.39  | -10.01 |
| P06179 FLIC_SALTY Flagellin;            | 8  |                       | QINSQTLGLDTLNVQQK             | 161 | 17 | 7  | 39.73  | b6b11b13*b13y3y4y17                                | 1899.99 | 66.700  | 4738   | 2 | 950.50  | -12.14 |
| P06179 FLIC_SALTY Flagellin;            | 9  |                       | AQPDLAEEAAATTENPLQK           | 392 | 19 | 5  | 21.89  | b3b5*b5b10*b10                                     | 1968.99 | 94.362  | 82775  | 2 | 985.00  | 0.25   |
| P06179 FLIC_SALTY Flagellin;            | 10 |                       | TEVVSIGGK                     | 370 | 9  | 3  | 30.48  | b3b6y7                                             | 889.50  | 33.838  | 15448  | 2 | 445.25  | 1.24   |
| P06179 FLIC_SALTY Flagellin;            | 11 |                       | DGSISINTTK                    | 339 | 10 | 4  | 26.9   | b4b7°b7y4                                          | 1035.55 | 64.927  | 7095   | 2 | 518.28  | 14.62  |
| P06179 FLIC_SALTY Flagellin;            | 12 |                       | ASATGLGGTDQK                  | 204 | 12 | 5  | 48.12  | b4b10b11y4y5                                       | 1105.54 | 48.340  | 3127   | 2 | 553.27  | -8.39  |
| P06179 FLIC_SALTY Flagellin;            | 13 |                       | IDAALAQVDTLRSDLGAVQNR         | 411 | 21 | 3  | 13.87  | b10y9y18                                           | 2226.19 | 63.267  | 22995  | 3 | 742.73  | 1.54   |
| P06179 FLIC_SALTY Flagellin;            | 14 |                       | FNSAITNLGNTVNNLTSARSR         | 432 | 21 | 8  | 36.23  | b4b6b7b9°b9°b9y11y13                               | 2250.17 | 111.860 | 5999   | 2 | 1125.59 | 4.88   |
| P06179 FLIC_SALTY Flagellin;            | 15 |                       | SDLGAVQNRFNNSAITNLGNTVNNLTSAR | 423 | 28 | 9  | 44.79  | b13b15°b15b16b17y11y14y18°y18                      | 2947.53 | 136.823 | 4745   | 2 | 1474.27 | 9.69   |
| P06179 FLIC_SALTY Flagellin;            | 16 |                       | YKVSDTAATVTGYADTTIALDNSTFK    | 178 | 26 | 3  | 22.81  | b7b12b13                                           | 2753.34 | 90.936  | 3172   | 3 | 918.45  | -3.64  |
| P06179 FLIC_SALTY Flagellin;            | 17 |                       | DGSISINTTKYTADDGTSK           | 339 | 19 | 3  | 14.93  | b3y6y15                                            | 1973.91 | 91.671  | 1557   | 3 | 658.64  | -9.15  |
| P06179 FLIC_SALTY Flagellin;            | 18 | Phosphoryl STY(13)    | TNGEVTLAGGATSPLTGGLPATATEDVK  | 252 | 28 | 6  | 28.12  | b4b7b12b16y13y16                                   | 2708.28 | 86.388  | 2693   | 2 | 1354.64 | -4.06  |
| P0A1D3 CH60_SALTY 60 kDa chaperonin;    | 1  |                       | GYLSPYFINKPETGAVELESPFILLADKK | 197 | 29 | 17 | 68.56  | b2b3b4°b4b6b7b9°b9b14y1y2y5y9y13y25y26y29          | 3239.71 | 95.455  | 135869 | 4 | 810.68  | -3.62  |
| P0A1D3 CH60_SALTY 60 kDa chaperonin;    | 2  |                       | ANDAAGDGTTTATVLAQSIITEGLK     | 80  | 25 | 20 | 148.12 | b1b2b3b4*b4b5b14b15y1y3y4y5°y5y6y7y8y9y10y14y25    | 2418.23 | 91.817  | 110229 | 3 | 806.75  | -4.34  |
| P0A1D3 CH60_SALTY 60 kDa chaperonin;    | 3  |                       | EMLPVLEAVAK                   | 231 | 11 | 10 | 73.95  | b2b3°b3y2y3y5y6y8y9y11                             | 1199.67 | 79.894  | 105476 | 2 | 600.34  | -3.36  |
| P0A1D3 CH60_SALTY 60 kDa chaperonin;    | 4  |                       | QQIEEATSDYDREK                | 350 | 14 | 9  | 42.4   | b7y2y5y7y8°y8y10y14*y14                            | 1711.76 | 33.470  | 71660  | 3 | 571.26  | -11.48 |
| P0A1D3 CH60_SALTY 60 kDa chaperonin;    | 5  |                       | VVINKDTTTHIDGVGEEAAIQGR       | 322 | 23 | 10 | 38.01  | b1b3y2y3y5y6y8*y8y13y23                            | 2399.27 | 67.411  | 65685  | 3 | 800.43  | -4.68  |
| P0A1D3 CH60_SALTY 60 kDa chaperonin;    | 6  |                       | LAGGVAVIK                     | 371 | 9  | 5  | 44.94  | b5b6y7y8y9                                         | 827.52  | 45.086  | 62970  | 2 | 414.27  | -14.01 |
| P0A1D3 CH60_SALTY 60 kDa chaperonin;    | 7  |                       | AVAAAVEELK                    | 122 | 10 | 7  | 40.12  | b2b3y2y5y7y8y10                                    | 1000.56 | 47.337  | 58126  | 2 | 500.78  | -7.20  |
| P0A1D3 CH60_SALTY 60 kDa chaperonin;    | 8  |                       | VEDALHATR                     | 395 | 9  | 11 | 104.34 | b2b3b4b5°b5y3y4y5y6y7y9                            | 1011.51 | 26.260  | 41360  | 2 | 506.26  | -9.90  |
| P0A1D3 CH60_SALTY 60 kDa chaperonin;    | 9  | Carbamidomethyl+C(6)  | QIVLNCGEEPSVVANTVK            | 452 | 18 | 7  | 32.73  | b7b13°b13y5y14y15y18                               | 1957.02 | 61.663  | 40141  | 2 | 979.01  | 5.55   |
| P0A1D3 CH60_SALTY 60 kDa chaperonin;    | 10 | Carbamidomethyl+C(18) | SALQYAASVAGLMITTECMVTDLPK     | 501 | 25 | 5  | 18.83  | b6b8b10y20y25                                      | 2670.34 | 86.369  | 38825  | 2 | 1335.67 | 7.22   |

|                                       |    |                       |                                                |     |    |    |       |                                   |         |         |        |   |         |        |
|---------------------------------------|----|-----------------------|------------------------------------------------|-----|----|----|-------|-----------------------------------|---------|---------|--------|---|---------|--------|
| [P0A1D3]CH60_SALTY 60 kDa chaperonin; | 11 | Carbamidomethyl+C(6)  | ALSVPCSDSK                                     | 132 | 10 | 11 | 74.33 | b2b3°b3y2y3°y3y5y6y7y8y10         | 1063.51 | 35.249  | 37860  | 2 | 532.26  | -3.21  |
| [P0A1D3]CH60_SALTY 60 kDa chaperonin; | 12 |                       | GVNVLADAVK                                     | 18  | 10 | 9  | 52.54 | b2b4b8°b8y1y3y5y6y10              | 985.56  | 56.095  | 35109  | 2 | 493.28  | -10.34 |
| [P0A1D3]CH60_SALTY 60 kDa chaperonin; | 13 |                       | AVAAGMNPMDLK                                   | 105 | 12 | 10 | 93.8  | b3b8y2y3y5y6y8y9y10y12            | 1217.60 | 58.395  | 34625  | 2 | 609.30  | -1.90  |
| [P0A1D3]CH60_SALTY 60 kDa chaperonin; | 14 |                       | SFGAPTITK                                      | 42  | 9  | 12 | 79.16 | b1b2b3°b3b8y1y2y3y5y7y8y9         | 921.50  | 44.926  | 33409  | 2 | 461.25  | -8.61  |
| [P0A1D3]CH60_SALTY 60 kDa chaperonin; | 15 |                       | AIAQVGTISANSDETVGK                             | 142 | 18 | 10 | 63.88 | b2b7y10y11y12y13°y13*y13y14y18    | 1760.91 | 48.408  | 28810  | 2 | 880.96  | 4.99   |
| [P0A1D3]CH60_SALTY 60 kDa chaperonin; | 16 |                       | GGDGNYGYNAAATEEYGNMIDMG ILDPTK                 | 470 | 28 | 6  | 26.83 | y1y3y5y10y11y28                   | 2966.32 | 88.094  | 25672  | 3 | 989.44  | 12.43  |
| [P0A1D3]CH60_SALTY 60 kDa chaperonin; | 17 |                       | ATLEDLGQAKR                                    | 311 | 11 | 6  | 41.49 | b2b5y3y5y9y11                     | 1201.65 | 39.142  | 15396  | 2 | 601.33  | -6.50  |
| [P0A1D3]CH60_SALTY 60 kDa chaperonin; | 18 |                       | GQNEQNVGIK                                     | 430 | 11 | 10 | 47.72 | b2°b2b4b10°b10y3y4y9*y9y11        | 1201.58 | 26.999  | 10140  | 2 | 601.30  | 2.34   |
| [P0A1D3]CH60_SALTY 60 kDa chaperonin; | 19 |                       | DGVSVAREIELEDK                                 | 51  | 14 | 4  | 19.28 | b6b10b14y3                        | 1559.77 | 78.006  | 5289   | 2 | 780.39  | -11.11 |
| [P0A1D3]CH60_SALTY 60 kDa chaperonin; | 20 |                       | VGAATEVEMK                                     | 380 | 10 | 5  | 40.12 | b1b3b4b8y7                        | 1034.51 | 56.077  | 3581   | 2 | 517.76  | -4.37  |
| [P0A1D3]CH60_SALTY 60 kDa chaperonin; | 21 |                       | LIAEAMDK                                       | 160 | 8  | 6  | 62.53 | b7°b7y3y5y6y7                     | 890.45  | 39.237  | 20262  | 2 | 445.73  | -18.23 |
| [P0A1D3]CH60_SALTY 60 kDa chaperonin; | 22 |                       | NVVLDK                                         | 36  | 6  | 2  | 26.84 | b5y4                              | 687.40  | 44.057  | 19494  | 1 | 687.40  | -6.93  |
| [P0A1D3]CH60_SALTY 60 kDa chaperonin; | 23 |                       | ATLEDLGQAK                                     | 311 | 10 | 4  | 26.9  | b7°b7b9y9                         | 1045.53 | 43.563  | 8840   | 2 | 523.27  | -22.30 |
| [P0A1D3]CH60_SALTY 60 kDa chaperonin; | 24 |                       | DTTIIIDGVGEEAAIQGR                             | 327 | 18 | 6  | 30.97 | b3b5b7y7*y7y11                    | 1845.96 | 63.251  | 8494   | 3 | 615.99  | 20.57  |
| [P0A1D3]CH60_SALTY 60 kDa chaperonin; | 25 |                       | AGKPLIIAEDVEGEALATLVVNT MR                     | 242 | 26 | 7  | 26.5  | b6y3°y3y7y9°y9y23                 | 2723.48 | 136.253 | 3675   | 3 | 908.50  | -6.90  |
| [P0A1D3]CH60_SALTY 60 kDa chaperonin; | 26 |                       | EGVITVEDGTGLQDELVDVEGMQ FDR                    | 171 | 26 | 7  | 31.71 | b9b11b13y11*y11y12°y12            | 2851.37 | 83.362  | 1816   | 3 | 951.13  | 14.73  |
| [P0A1D3]CH60_SALTY 60 kDa chaperonin; | 27 |                       | EIELEDK                                        | 58  | 7  | 5  | 40.46 | b3°b3b5°b5y3                      | 875.43  | 68.985  | 1505   | 1 | 875.43  | -11.16 |
| [P0A1D3]CH60_SALTY 60 kDa chaperonin; | 28 |                       | EIELEDKFENMGAMVK                               | 58  | 17 | 6  | 36.13 | b9y6y7y10*y10y14                  | 2010.94 | 73.234  | 114556 | 3 | 670.99  | -5.04  |
| [P0A1D3]CH60_SALTY 60 kDa chaperonin; | 29 |                       | IADLKGQNEQNVGIK                                | 425 | 16 | 12 | 78.88 | b3b9y3y4y8y9*y9y10°y10*y10y11°y11 | 1741.89 | 40.018  | 98093  | 3 | 581.30  | -11.98 |
| [P0A1D3]CH60_SALTY 60 kDa chaperonin; | 30 | Carbamidomethyl+C(16) | AVAAAVEELKALSVPCSDSK                           | 122 | 20 | 6  | 37.58 | b4b14y6y10y11y18                  | 2045.04 | 71.889  | 49552  | 3 | 682.35  | -10.74 |
| [P0A1D3]CH60_SALTY 60 kDa chaperonin; | 31 |                       | AMLQDIATLTGGTVISEEIGMELE KATLEDLGQAK           | 286 | 35 | 10 | 46.97 | b3b5b6°b6b7°b7y5y21y25y29         | 3675.89 | 122.058 | 36505  | 3 | 1225.97 | 5.25   |
| [P0A1D3]CH60_SALTY 60 kDa chaperonin; | 32 | Carbamidomethyl+C(13) | AMEAPLRQIVLNCGEPSVVANT VK                      | 445 | 25 | 6  | 23.09 | b4b5°b5b7y13°y13                  | 2725.40 | 73.906  | 22675  | 3 | 909.14  | 0.18   |
| [P0A1D3]CH60_SALTY 60 kDa chaperonin; | 33 |                       | AVAAGMNPMDLKR                                  | 105 | 13 | 9  | 96.93 | b3y3y4y5y6y7y8*y8y11              | 1373.70 | 50.810  | 17782  | 2 | 687.35  | -2.13  |
| [P0A1D3]CH60_SALTY 60 kDa chaperonin; | 34 | Carbamidomethyl+C(6)  | ALSVPCSDSKAIAQVGTISANSDE TVGK                  | 132 | 28 | 6  | 25.11 | b10b11°b11y12y14°y14              | 2805.36 | 70.261  | 12166  | 3 | 935.79  | -13.49 |
| [P0A1D3]CH60_SALTY 60 kDa chaperonin; | 35 |                       | LIAEAMDKVGK                                    | 160 | 11 | 4  | 24.3  | b6b8y9°y9                         | 1174.64 | 46.146  | 11117  | 2 | 587.82  | -9.98  |
| [P0A1D3]CH60_SALTY 60 kDa chaperonin; | 36 |                       | EVASKANDAAGDGTTTATVLAQS IITEGLK                | 75  | 30 | 3  | 17.28 | b3b8b10                           | 2932.50 | 87.268  | 9651   | 3 | 978.17  | -2.58  |
| [P0A1D3]CH60_SALTY 60 kDa chaperonin; | 37 |                       | ANDAAGDGTTTATVLAQSIITEGL KAVAAGMNPMDLK         | 80  | 37 | 5  | 20.22 | b11y3y5y8y12                      | 3616.81 | 131.511 | 4883   | 4 | 904.96  | -2.90  |
| [P0A1D3]CH60_SALTY 60 kDa chaperonin; | 38 | Carbamidomethyl+C(6)  | QIVLNCGEPSVVANTVKGGDGN YGYNAATEEYGNMIDMGILDPTK | 452 | 46 | 3  | 24.53 | y3y9y10                           | 4904.29 | 89.214  | 3379   | 4 | 1226.83 | 3.39   |
| [P0A1D3]CH60_SALTY 60 kDa chaperonin; | 39 |                       | VGKEGVITVEDGTGLQDELVDVVE GMQFDR                | 168 | 29 | 7  | 24.93 | b14b15y4*y4y12°y12*y12            | 3135.52 | 72.859  | 3308   | 4 | 784.64  | 2.57   |

|                                               |    |                   |                               |     |    |    |        |                                     |         |         |        |   |         |        |
|-----------------------------------------------|----|-------------------|-------------------------------|-----|----|----|--------|-------------------------------------|---------|---------|--------|---|---------|--------|
| [P0A1D3]CH60_SALTY 60 kDa chaperonin;         | 40 |                   | DTTIIIDGVGEEAAIQGRVAQIR       | 327 | 23 | 6  | 19.45  | b12°b12b16°b16b18°b18               | 2413.26 | 136.823 | 2991   | 2 | 1207.13 | -5.06  |
| [P0A1D3]CH60_SALTY 60 kDa chaperonin;         | 41 |                   | DGVSVAREIELEDK                | 51  | 14 | 3  | 19.28  | b13y3y9                             | 1559.81 | 97.823  | 2878   | 2 | 780.41  | 14.63  |
| [P0A1D3]CH60_SALTY 60 kDa chaperonin;         | 42 | Phosphoryl.STY(4) | DGVSVAREIELEDK                | 51  | 14 | 6  | 45.41  | b3y7y8°y8y9y12                      | 1639.75 | 40.141  | 23527  | 3 | 547.25  | -0.89  |
| [P0A1D3]CH60_SALTY 60 kDa chaperonin;         | 43 | Oxidation+M(22)   | EGVITVEDGTGLQDELDVVEGMQ FDR   | 171 | 26 | 4  | 18.28  | b4b7b10y14                          | 2867.33 | 113.253 | 38029  | 3 | 956.45  | 2.21   |
| [P0A1D3]CH60_SALTY 60 kDa chaperonin;         | 44 | Oxidation+M()     | AMLQDIATLTGGTVISEEIGMELE K    | 286 | 25 | 4  | 23.09  | b11y9y10y14                         | 2665.32 | 92.186  | 10884  | 2 | 1333.16 | -5.86  |
| [P0A1D3]CH60_SALTY 60 kDa chaperonin;         | 45 | Oxidation+M(9)    | VGAATEVEMK                    | 380 | 10 | 3  | 33.89  | b5b6b8                              | 1050.51 | 109.973 | 1882   | 1 | 1050.51 | -3.72  |
| [P0A1D3]CH60_SALTY 60 kDa chaperonin;         | 46 |                   | EDALHATR                      | 396 | 8  | 0  | 1.62   |                                     | 912.45  | 26.279  | 28618  | 2 | 456.73  | -6.09  |
| [P0A1D3]CH60_SALTY 60 kDa chaperonin;         | 47 |                   | AAAVEELK                      | 124 | 8  | 0  | 2.02   |                                     | 830.45  | 47.341  | 8428   | 1 | 830.45  | -13.74 |
| [P0A1D3]CH60_SALTY 60 kDa chaperonin;         | 48 |                   | EMLPVLEAVAK                   | 231 | 11 | 1  | 7.86   | y4                                  | 1181.64 | 79.878  | 7383   | 2 | 591.32  | -12.71 |
| [P0A1D3]CH60_SALTY 60 kDa chaperonin;         | 49 |                   | QQIEEATSDYDREK                | 350 | 14 | 2  | 15.6   | y4y6                                | 1694.75 | 33.447  | 3253   | 3 | 565.59  | 0.50   |
| [Q7CR46]IRAP_SALTY Anti-adaptor protein iraP; | 1  |                   | QVEGALEGVKPDASVPDHDTELL R     | 50  | 24 | 13 | 91.78  | b7°b7b9°b9b14y3y5y7y8y9y10y11y19    | 2575.26 | 59.642  | 31051  | 4 | 644.57  | -13.65 |
| [Q7CR46]IRAP_SALTY Anti-adaptor protein iraP; | 2  |                   | NMAQNEQEMLIR                  | 38  | 12 | 6  | 35.49  | b2y8y9°y9y10y12                     | 1476.70 | 55.947  | 27737  | 2 | 738.85  | 1.49   |
| [Q7CR46]IRAP_SALTY Anti-adaptor protein iraP; | 3  | Oxidation+M(9)    | NMAQNEQEMLIR                  | 38  | 12 | 3  | 22.27  | b4y5y7                              | 1492.68 | 60.397  | 3269   | 2 | 746.84  | -3.93  |
| [Q7CR46]IRAP_SALTY Anti-adaptor protein iraP; | 4  |                   | EGVKPDASVPDHDTELLR            | 56  | 18 | 0  | 7.69   |                                     | 1977.98 | 59.597  | 16334  | 3 | 660.00  | -2.84  |
| [P66313]RL6_SALTY 50S ribosomal protein L6;   | 1  |                   | APVVVPAGVDVK                  | 6   | 12 | 14 | 141.23 | b2b3b4b5y2y3y4y5y6y7y8y9y10y12      | 1150.67 | 53.272  | 65842  | 2 | 575.84  | -8.38  |
| [P66313]RL6_SALTY 50S ribosomal protein L6;   | 2  |                   | TLNDAVEVK                     | 35  | 9  | 12 | 57.5   | b1°b1b2°b2y1y3°y3y4y7°y7y8y9        | 988.52  | 38.412  | 50791  | 2 | 494.76  | -9.94  |
| [P66313]RL6_SALTY 50S ribosomal protein L6;   | 3  |                   | INGQVITIK                     | 18  | 9  | 5  | 45.46  | b3y3y4y8y9                          | 985.60  | 48.446  | 42597  | 2 | 493.30  | -7.56  |
| [P66313]RL6_SALTY 50S ribosomal protein L6;   | 4  |                   | HADNALTFGPR                   | 44  | 11 | 4  | 27.31  | b5b6y9°y9                           | 1198.59 | 46.450  | 22276  | 2 | 599.80  | -7.23  |
| [P66313]RL6_SALTY 50S ribosomal protein L6;   | 5  |                   | ALLNSMVIGVTEGFTK              | 69  | 16 | 3  | 24.86  | y4y6y9                              | 1679.90 | 94.147  | 50583  | 2 | 840.45  | -0.73  |
| [P66313]RL6_SALTY 50S ribosomal protein L6;   | 6  |                   | NGELTRTLNDAVEVK               | 29  | 15 | 4  | 29.43  | b5b10b12y8                          | 1658.85 | 81.941  | 10022  | 2 | 829.93  | -9.57  |
| [P0A1E3]CYSK_SALTY Cysteine synthase A;       | 1  |                   | YLSTALFADLFTEKELQQ            | 305 | 18 | 8  | 32.73  | b2b5b16y2y7y8y11y18                 | 2117.09 | 102.087 | 110055 | 2 | 1059.05 | 4.04   |
| [P0A1E3]CYSK_SALTY Cysteine synthase A;       | 2  |                   | IQIGAGFIPGNLDLK               | 226 | 16 | 9  | 24.25  | b2°b2b3b8y2y7°y7y10y16              | 1612.91 | 83.223  | 79541  | 2 | 806.96  | 2.19   |
| [P0A1E3]CYSK_SALTY Cysteine synthase A;       | 3  |                   | LTLTMPETMSIER                 | 87  | 13 | 13 | 101.4  | b5°b5b10b12y6y8°y8y9°y9y10y11y12y13 | 1521.77 | 73.793  | 73443  | 2 | 761.39  | 1.93   |
| [P0A1E3]CYSK_SALTY Cysteine synthase A;       | 4  |                   | YLLLQQFSNPANPEIHEK            | 137 | 18 | 12 | 62.17  | b2b3y3°y3y6y7°y7y9°y9y11y15y18      | 2141.09 | 73.877  | 62348  | 3 | 714.37  | -5.36  |
| [P0A1E3]CYSK_SALTY Cysteine synthase A;       | 5  |                   | GVLKPGVELVEPTSGNTGIALAYV AAAR | 56  | 28 | 5  | 25.32  | y4y6y14y17y28                       | 2753.52 | 81.346  | 60649  | 3 | 918.51  | -0.27  |
| [P0A1E3]CYSK_SALTY Cysteine synthase A;       | 6  |                   | ALGANLVLTEGAK                 | 105 | 13 | 4  | 29.88  | b2y3y5y7                            | 1256.72 | 61.134  | 23507  | 2 | 628.86  | -0.29  |
| [P0A1E3]CYSK_SALTY Cysteine synthase A;       | 7  |                   | NIVVILPSSGER                  | 293 | 12 | 10 | 82.8   | b2b3b4y6°y6y7y8y9y10y12             | 1283.73 | 63.934  | 21894  | 2 | 642.37  | -4.09  |
| [P0A1E3]CYSK_SALTY Cysteine synthase A;       | 8  |                   | IGANMIWDAEK                   | 44  | 11 | 5  | 35.3   | b3b9°b9y6y9                         | 1247.62 | 65.269  | 18480  | 2 | 624.31  | 4.89   |
| [P0A1E3]CYSK_SALTY Cysteine synthase A;       | 9  |                   | VVGITNEEAISTAR                | 246 | 14 | 4  | 30.73  | b3y9y10y12                          | 1459.77 | 49.381  | 17860  | 2 | 730.39  | -6.27  |



|                                         |    |                   |                                     |     |    |    |        |                                                    |         |         |        |   |         |        |
|-----------------------------------------|----|-------------------|-------------------------------------|-----|----|----|--------|----------------------------------------------------|---------|---------|--------|---|---------|--------|
| [P0A1E3]CYSK_SALTY Cysteine synthase A; | 10 |                   | AEEIVASDPQK                         | 126 | 11 | 6  | 52.49  | b3b5y3y5y7y11                                      | 1186.59 | 31.501  | 16020  | 2 | 593.80  | -3.39  |
| [P0A1E3]CYSK_SALTY Cysteine synthase A; | 11 |                   | LTLTMPETMSIERR                      | 87  | 14 | 5  | 33.01  | b9°b9b10y9y11                                      | 1677.87 | 67.795  | 3888   | 3 | 559.96  | 2.62   |
| [P0A1E3]CYSK_SALTY Cysteine synthase A; | 12 |                   | IYEDNSLTIGHTPLVR                    | 3   | 16 | 4  | 24.25  | b8b11y4y7                                          | 1827.94 | 61.563  | 26844  | 3 | 609.99  | -8.81  |
| [P0A1E3]CYSK_SALTY Cysteine synthase A; | 13 |                   | GKTDLTITVAVEPTDSPVIAQALAG EEIKPGPHK | 193 | 33 | 3  | 16.83  | y5y10y22                                           | 3381.79 | 79.396  | 39337  | 4 | 846.20  | -11.55 |
| [P0A1E3]CYSK_SALTY Cysteine synthase A; | 14 |                   | AEEIVASDPQKYLLQQFSNPANP EIHEK       | 126 | 29 | 9  | 38.75  | b3b4°b4b5°b5b13y6y9*y9                             | 3308.67 | 76.821  | 20199  | 4 | 827.92  | -1.48  |
| [P0A1E3]CYSK_SALTY Cysteine synthase A; | 15 |                   | GAIQKAAEEIVASDPQK                   | 121 | 16 | 5  | 17.15  | b14y7°y7*y7y10                                     | 1683.91 | 67.427  | 6385   | 2 | 842.46  | 9.93   |
| [P0A1E3]CYSK_SALTY Cysteine synthase A; | 16 |                   | GYKLTLTMPETMSIER                    | 84  | 16 | 3  | 17.15  | b11y3y10                                           | 1869.95 | 75.238  | 5799   | 3 | 623.99  | 3.72   |
| [P0A1E3]CYSK_SALTY Cysteine synthase A; | 17 |                   | LMEEEGILAGISSGAAVAAALKLQ EDESFTNK   | 261 | 32 | 3  | 11.14  | b8y11y23                                           | 3292.62 | 126.360 | 2463   | 3 | 1098.21 | -11.79 |
| [P0A1E3]CYSK_SALTY Cysteine synthase A; | 18 |                   | SKIYEDNSLTIGHTPLVR                  | 1   | 18 | 3  | 22.74  | b6b10b12                                           | 2043.07 | 51.429  | 2386   | 3 | 681.70  | -8.07  |
| [P0A1E3]CYSK_SALTY Cysteine synthase A; | 19 | Phosphoryl STY(8) | IYEDNSLTIGHTPLVR                    | 3   | 16 | 3  | 17.15  | b4b7y9                                             | 1907.91 | 38.433  | 3637   | 3 | 636.64  | -2.56  |
| [P0A1E3]CYSK_SALTY Cysteine synthase A; | 20 | Oxidation+M(5)    | LTLTMPETMSIERR                      | 87  | 14 | 5  | 30.73  | b7b8°b8b12y8                                       | 1693.84 | 67.847  | 11058  | 3 | 565.29  | -12.18 |
| [P0A1E3]CYSK_SALTY Cysteine synthase A; | 21 |                   | LTMPETMSIER                         | 89  | 11 | 1  | 7.42   | b7                                                 | 1307.64 | 73.787  | 10187  | 3 | 436.55  | 1.77   |
| [P52616]FLJB_SALTY Phase 2 flagellin;   | 1  |                   | AQILQQAGTSVLAQANQVPQNVLSLLR         | 479 | 27 | 20 | 106.92 | b2*b2b3b4b5°b5b7b8b17b18y1y2y4y6y9y10y12*y12y13y27 | 2860.60 | 104.953 | 132071 | 3 | 954.21  | 0.51   |
| [P52616]FLJB_SALTY Phase 2 flagellin;   | 2  |                   | SQSALGTAIER                         | 20  | 11 | 9  | 41.49  | b2*b2b3y1y5y7y9°y9y11                              | 1132.59 | 41.984  | 45416  | 2 | 566.80  | -6.25  |
| [P52616]FLJB_SALTY Phase 2 flagellin;   | 3  |                   | INSAKDDAAGQAIANR                    | 37  | 16 | 11 | 65.76  | b2b9°b9y3y4y5y7*y7y10y11y16                        | 1614.80 | 30.181  | 30742  | 3 | 538.94  | -12.78 |
| [P52616]FLJB_SALTY Phase 2 flagellin;   | 4  |                   | VSGQTQFNGVK                         | 125 | 11 | 8  | 36.72  | b10y3y9°y9y10°y10*y10y11                           | 1164.60 | 33.207  | 21905  | 2 | 582.80  | -3.04  |
| [P52616]FLJB_SALTY Phase 2 flagellin;   | 5  |                   | TAANQLGGVDGK                        | 369 | 12 | 6  | 22.27  | b4°b4*b4y5y8y12                                    | 1130.58 | 35.365  | 20326  | 2 | 565.79  | -2.70  |
| [P52616]FLJB_SALTY Phase 2 flagellin;   | 6  |                   | VRELAVQSANSTNSQSDLDISIAEITQR        | 91  | 28 | 3  | 11.7   | b3y3y9                                             | 3060.54 | 66.837  | 16127  | 3 | 1020.85 | 7.98   |
| [P52616]FLJB_SALTY Phase 2 flagellin;   | 7  |                   | FNSAITNLGNTVNNLSEAR                 | 443 | 19 | 3  | 14.93  | b5b10y6                                            | 2035.01 | 57.300  | 4280   | 4 | 509.51  | -6.06  |
| [P52616]FLJB_SALTY Phase 2 flagellin;   | 8  |                   | DTPAVVSADAK                         | 288 | 11 | 3  | 24.3   | b7b9y4                                             | 1073.56 | 27.012  | 1518   | 2 | 537.28  | 11.48  |
| [P52616]FLJB_SALTY Phase 2 flagellin;   | 9  |                   | AQVINTNSLSLLTQNNLNK                 | 1   | 19 | 4  | 14.93  | b7*b7y10y15                                        | 2085.15 | 74.555  | 37560  | 2 | 1043.08 | 7.38   |
| [P52616]FLJB_SALTY Phase 2 flagellin;   | 10 |                   | AYANNGTTLDSVGLDDAAIK                | 189 | 20 | 6  | 19.76  | b3b11°b11y6°y6y14                                  | 2008.99 | 78.259  | 16029  | 3 | 670.34  | 4.19   |
| [P52616]FLJB_SALTY Phase 2 flagellin;   | 11 |                   | SDLGAVQNR                           | 434 | 9  | 3  | 38.26  | y4y6y7                                             | 959.48  | 27.649  | 14798  | 2 | 480.24  | -10.94 |
| [P52616]FLJB_SALTY Phase 2 flagellin;   | 12 |                   | ELAVQSANSTNSQSDLDISIAEITQR          | 93  | 26 | 5  | 12.14  | b13°b13y3y11*y11                                   | 2805.36 | 99.748  | 6427   | 3 | 935.79  | 2.00   |
| [P52616]FLJB_SALTY Phase 2 flagellin;   | 13 |                   | TTSYTAADGTTK                        | 357 | 12 | 4  | 26.25  | b6°b6b7y6                                          | 1216.58 | 59.639  | 6299   | 3 | 406.20  | 7.63   |
| [P52616]FLJB_SALTY Phase 2 flagellin;   | 14 |                   | AATGGTNGTASVTGGAVK                  | 209 | 18 | 7  | 36.54  | b4°b4b5°b5y13y14°y14                               | 1519.74 | 57.730  | 3592   | 2 | 760.38  | -17.99 |
| [P52616]FLJB_SALTY Phase 2 flagellin;   | 15 |                   | MAQVINTNSLSLLTQNNLNK                | 0   | 20 | 7  | 39.19  | b4b5b6°b6b8y7*y7                                   | 2216.14 | 98.387  | 3382   | 2 | 1108.57 | -15.53 |
| [P52616]FLJB_SALTY Phase 2 flagellin;   | 16 |                   | NANDGISIAQTTEGALNEINNNLQ R          | 66  | 25 | 3  | 12.4   | b8b11y6                                            | 2670.34 | 61.959  | 3313   | 3 | 890.78  | 10.24  |
| [P52616]FLJB_SALTY Phase 2 flagellin;   | 17 |                   | SRIEDSDYATEVSNMSR                   | 462 | 17 | 7  | 51.19  | b4b5b7b8y6*y6y9                                    | 1959.89 | 50.812  | 34241  | 2 | 980.45  | 10.40  |

|                                                   |    |                 |                                      |     |    |    |        |                                                              |         |         |       |   |         |        |
|---------------------------------------------------|----|-----------------|--------------------------------------|-----|----|----|--------|--------------------------------------------------------------|---------|---------|-------|---|---------|--------|
| P52616 FLJB_SALTY Phase 2 flagellin;              | 18 |                 | SDLGAVQNRFSAITNLGNTVNN<br>LSEAR      | 434 | 28 | 4  | 21.91  | b9y10*y10y11                                                 | 2975.48 | 93.434  | 9897  | 3 | 992.50  | -5.83  |
| P52616 FLJB_SALTY Phase 2 flagellin;              | 19 |                 | AATGGTNGTASVTGGAVKFDAD<br>NNK        | 209 | 25 | 7  | 42.66  | b11b12b20y8y9y12y17                                          | 2324.14 | 96.908  | 9601  | 2 | 1162.57 | 11.98  |
| P52616 FLJB_SALTY Phase 2 flagellin;              | 20 |                 | TEVVTDIDGKTYNASK                     | 381 | 15 | 3  | 18.13  | b3b10y8                                                      | 1625.83 | 70.337  | 9489  | 2 | 813.42  | -2.25  |
| P52616 FLJB_SALTY Phase 2 flagellin;              | 21 |                 | TAANQLGGVDGKTEVVTDIDGK               | 369 | 21 | 7  | 31.18  | b5°b5b10b13b14*b14y18                                        | 2073.10 | 89.768  | 6071  | 3 | 691.70  | 6.36   |
| P52616 FLJB_SALTY Phase 2 flagellin;              | 22 |                 | AAGHDFKAQPELAEEAAK                   | 396 | 18 | 5  | 15.58  | b10*b10b12°b12y3                                             | 1824.95 | 72.103  | 5324  | 3 | 608.99  | 12.58  |
| P52616 FLJB_SALTY Phase 2 flagellin;              | 23 |                 | TIEGGYALKAGDK                        | 328 | 13 | 4  | 28.12  | b3°b3b6b7                                                    | 1322.68 | 89.724  | 3151  | 2 | 661.84  | -12.46 |
| P52616 FLJB_SALTY Phase 2 flagellin;              | 24 |                 | AKTTSYTAADGTTK                       | 355 | 14 | 5  | 42.4   | b6b9b10b12y10                                                | 1415.72 | 75.995  | 2628  | 2 | 708.36  | 12.24  |
| P52616 FLJB_SALTY Phase 2 flagellin;              | 25 |                 | TTSYTAADGTTKTAANQLGGVD<br>GK         | 357 | 24 | 4  | 12.7   | b3b6y12°y12                                                  | 2328.11 | 69.946  | 2502  | 3 | 776.71  | -10.17 |
| P52616 FLJB_SALTY Phase 2 flagellin;              | 26 |                 | AQVINTNSLSLLTQNNLNKSQSAL<br>GTAIER   | 1   | 30 | 6  | 24.34  | b3b5*b5b8*b8b10                                              | 3198.66 | 136.228 | 1965  | 3 | 1066.89 | -14.27 |
| P00924 ENO1_YEAST Enolase 1;                      | 1  |                 | NVNDVIAPAFVK                         | 67  | 12 | 16 | 111.78 | b2b4*b4b5°b5b6y2y3y5y6<br>y7y9y10°y10*y10y12                 | 1286.71 | 65.979  | 96092 | 2 | 643.86  | -3.98  |
| P00924 ENO1_YEAST Enolase 1;                      | 2  |                 | VNQIGTLSSEIK                         | 346 | 12 | 13 | 105.76 | b2b3b4b6y1y3y5y6y8y9°y9<br>y10y12                            | 1288.71 | 54.224  | 73954 | 2 | 644.86  | -2.75  |
| P00924 ENO1_YEAST Enolase 1;                      | 3  |                 | TFAEALR                              | 178 | 7  | 8  | 63.88  | b3y1y3y4y5°y5y6y7                                            | 807.43  | 45.505  | 65152 | 2 | 404.22  | -13.30 |
| P00924 ENO1_YEAST Enolase 1;                      | 4  |                 | SIVPSGASTGVHEALEMR                   | 32  | 18 | 12 | 108.51 | b13y2y3y4y5y6°y6y9y10y1<br>ly14y15                           | 1840.91 | 61.423  | 65045 | 3 | 614.31  | -9.15  |
| P00924 ENO1_YEAST Enolase 1;                      | 5  |                 | TAGIQIVADDLTVTNPK                    | 312 | 17 | 8  | 63.36  | b14y3y7y8y10y11y13y17                                        | 1755.95 | 72.304  | 50827 | 2 | 878.48  | 2.29   |
| P00924 ENO1_YEAST Enolase 1;                      | 6  |                 | AAQDSFAAGWGMVSHR                     | 358 | 17 | 6  | 24.96  | y3y6°y6y7°y7y17                                              | 1789.86 | 50.740  | 30539 | 3 | 597.29  | 9.55   |
| P00924 ENO1_YEAST Enolase 1;                      | 7  |                 | AVDDFLISLDGTANK                      | 88  | 15 | 8  | 58.36  | b3b5b7b10y5y6°y6y15                                          | 1578.80 | 82.005  | 26117 | 2 | 789.91  | 1.78   |
| P00924 ENO1_YEAST Enolase 1;                      | 8  |                 | IEEELGDNAVFAGENFHHGDK                | 415 | 21 | 8  | 54.46  | b1b3b4b12y4y5y6y13                                           | 2328.02 | 57.653  | 24429 | 4 | 582.76  | -12.58 |
| P00924 ENO1_YEAST Enolase 1;                      | 9  |                 | AADALLK                              | 338 | 8  | 5  | 67.3   | y3y4y5y6y7                                                   | 814.49  | 53.706  | 74562 | 2 | 407.75  | -20.16 |
| P00924 ENO1_YEAST Enolase 1;                      | 10 |                 | IATAIEK                              | 330 | 7  | 7  | 63.88  | b4°b4y3y4y5y6°y6                                             | 745.43  | 28.295  | 33399 | 2 | 373.22  | -16.70 |
| P00924 ENO1_YEAST Enolase 1;                      | 11 |                 | LNQLLR                               | 409 | 6  | 5  | 40.06  | y3y4*y4y5*y5                                                 | 756.46  | 42.680  | 30286 | 2 | 378.73  | -14.60 |
| P00924 ENO1_YEAST Enolase 1;                      | 12 |                 | NVPLYK                               | 126 | 6  | 1  | 13.62  | y4                                                           | 733.42  | 36.966  | 19824 | 1 | 733.42  | -7.49  |
| P00924 ENO1_YEAST Enolase 1;                      | 13 |                 | YGASAGNVGDEGGVAPNIQTAE<br>ALDLIVDAIK | 201 | 33 | 4  | 11.05  | b3b5y13°y13                                                  | 3257.65 | 62.425  | 11819 | 6 | 543.78  | 11.39  |
| P00924 ENO1_YEAST Enolase 1;                      | 14 |                 | YPIVSIEDPFAEDDWEAWSHFFK              | 289 | 23 | 5  | 28.23  | b4b9y3y4y6                                                   | 2828.33 | 124.266 | 2041  | 4 | 707.84  | 15.19  |
| P00924 ENO1_YEAST Enolase 1;                      | 15 |                 | SVYDSRGNPTVEVELTTEK                  | 9   | 19 | 4  | 28.47  | b8b9y8y10                                                    | 2124.03 | 48.305  | 3468  | 3 | 708.68  | -5.40  |
| P00924 ENO1_YEAST Enolase 1;                      | 16 |                 | VNQIGTLSSEIKAAQDSFAAGWG<br>VMVSHR    | 346 | 29 | 3  | 22.71  | y3y13y14                                                     | 3059.51 | 97.830  | 2290  | 3 | 1020.51 | -8.54  |
| P00924 ENO1_YEAST Enolase 1;                      | 17 | Oxidation+M(15) | WLTGPQLADLYHSLMK                     | 272 | 16 | 6  | 30.79  | b4°b4b13°b13y8y9                                             | 1888.98 | 85.390  | 23121 | 2 | 944.99  | 9.37   |
| P00924 ENO1_YEAST Enolase 1;                      | 18 | Oxidation+M(17) | SIVPSGASTGVHEALEMRDGD<br>K           | 32  | 22 | 5  | 20.86  | b7b10b13°b13y9                                               | 2272.09 | 109.063 | 5745  | 3 | 758.03  | -0.75  |
| P00924 ENO1_YEAST Enolase 1;                      | 19 | Oxidation+M(15) | WLTGPQLADLYHSLMKR                    | 272 | 17 | 3  | 16.31  | b9b12y8                                                      | 2045.05 | 73.948  | 2781  | 2 | 1023.03 | -5.49  |
| P00924 ENO1_YEAST Enolase 1;                      | 20 | Oxidation+M(13) | AAQDSFAAGWGMVSHR                     | 358 | 17 | 5  | 26.14  | b5y6y10°y10y12                                               | 1805.85 | 50.722  | 1502  | 2 | 903.43  | 8.04   |
| P00924 ENO1_YEAST Enolase 1;                      | 21 |                 | FAAGWGMVSHR                          | 363 | 12 | 0  | 4.85   |                                                              | 1317.67 | 50.727  | 5768  | 2 | 659.34  | 13.62  |
| P00924 ENO1_YEAST Enolase 1;                      | 22 |                 | AVDDFLISLDGTAN                       | 88  | 14 | 0  | 4.05   |                                                              | 1450.71 | 81.966  | 4419  | 2 | 725.86  | 0.67   |
| P00924 ENO1_YEAST Enolase 1;                      | 23 |                 | PSGASTGVHEALEMR                      | 35  | 15 | 1  | 7.34   | b11                                                          | 1541.75 | 61.406  | 2674  | 2 | 771.38  | 6.10   |
| P0A299 RL7_SALTY 50S ribosomal<br>protein L7/L12; | 1  |                 | DQIIEAVSAMSVMDEVVELISAMEE<br>K       | 5   | 25 | 22 | 159.07 | b2°b2*b2b3b4b5b6b7b8b1<br>0°b10y2°y2y3y4y5y6y7y8y<br>9°y9y25 | 2737.34 | 137.042 | 22668 | 3 | 913.12  | 1.16   |
| P0A299 RL7_SALTY 50S ribosomal<br>protein L7/L12; | 2  |                 | EAKDLVESAPAALK                       | 82  | 14 | 3  | 27.06  | b3b4b13                                                      | 1441.80 | 60.422  | 4886  | 2 | 721.41  | 9.40   |
| P0A299 RL7_SALTY 50S ribosomal<br>protein L7/L12; | 3  |                 | DLVESAPAALKEGVSK                     | 85  | 16 | 5  | 17.15  | b2°b2b5b9y5                                                  | 1613.86 | 56.618  | 3911  | 3 | 538.63  | -8.17  |

|                                                 |    |                |                                     |     |    |    |        |                                           |         |         |        |   |         |        |
|-------------------------------------------------|----|----------------|-------------------------------------|-----|----|----|--------|-------------------------------------------|---------|---------|--------|---|---------|--------|
| [P0A299]RL7_SALTY 50S ribosomal protein L7/L12; | 4  |                | SITKDKIIEAVSAMSVM DVVELISA MEEK     | 1   | 29 | 4  | 22.71  | b1y9y11y12                                | 3166.63 | 114.401 | 3836   | 3 | 1056.22 | 12.49  |
| [P0A299]RL7_SALTY 50S ribosomal protein L7/L12; | 5  |                | DLVESAPAALK                         | 85  | 11 | 3  | 31.29  | y4y5y9                                    | 1113.59 | 53.385  | 19128  | 2 | 557.30  | -21.59 |
| [P0A299]RL7_SALTY 50S ribosomal protein L7/L12; | 6  |                | SLEEAGAEVEVK                        | 109 | 12 | 4  | 32.18  | b3b10y3y7                                 | 1260.63 | 64.225  | 8578   | 2 | 630.82  | 0.68   |
| [P0A299]RL7_SALTY 50S ribosomal protein L7/L12; | 7  |                | AAGANK                              | 60  | 6  | 1  | 13.62  | b4                                        | 531.29  | 30.342  | 6390   | 1 | 531.29  | -2.30  |
| [P0A299]RL7_SALTY 50S ribosomal protein L7/L12; | 8  |                | AAGANK VAVIK                        | 60  | 11 | 9  | 97.37  | b3b6*b6b7b9b10y4y5y7                      | 1041.63 | 29.327  | 39411  | 2 | 521.32  | -6.91  |
| [P0A299]RL7_SALTY 50S ribosomal protein L7/L12; | 9  |                | FGVSAAA AVAVAAGPAEAAEEKT EFDVILK    | 30  | 30 | 4  | 22.72  | b6b7*b7b10                                | 2932.53 | 136.302 | 7920   | 3 | 978.18  | 1.08   |
| [P0A299]RL7_SALTY 50S ribosomal protein L7/L12; | 10 | Oxidation+M(1) | MSITKDKIIEAVSAMSVM DVVELI SAMEEK    | 0   | 30 | 4  | 24.77  | b3b10y6y7                                 | 3313.65 | 123.480 | 2079   | 3 | 1105.22 | 7.29   |
| [P0A299]RL7_SALTY 50S ribosomal protein L7/L12; | 11 |                | DLVESAPAALK                         | 85  | 11 | 1  | 7.32   | b4                                        | 1113.60 | 60.367  | 4269   | 2 | 557.30  | -14.36 |
| [P0A1Z2]SKP_SALTY Chaperone protein skp;        | 1  |                | IAIVNMG NLFQQVAQK                   | 23  | 16 | 17 | 117.58 | b2b3b4b5b15y1y2*y2y3y5y6y7*y7y11y12y13y16 | 1773.97 | 89.613  | 164578 | 2 | 887.49  | 1.03   |
| [P0A1Z2]SKP_SALTY Chaperone protein skp;        | 2  |                | VANDQSIDL VVDANTVAYNSSDV K DITADVLK | 126 | 32 | 16 | 72.69  | b1b2b4b5b6b7*b7b8*b8b10*b10b18b31*b31y1y3 | 3392.72 | 89.604  | 122369 | 3 | 1131.58 | 3.09   |
| [P0A1Z2]SKP_SALTY Chaperone protein skp;        | 3  |                | TGVSNTLENEFK                        | 39  | 12 | 6  | 47.92  | y2y4y5y7y8y12                             | 1338.65 | 57.687  | 107252 | 2 | 669.83  | -1.00  |
| [P0A1Z2]SKP_SALTY Chaperone protein skp;        | 4  |                | AQAFEKDR                            | 97  | 8  | 4  | 36.09  | b3y4y6y8                                  | 964.48  | 17.621  | 41314  | 2 | 482.74  | -7.66  |
| [P0A1Z2]SKP_SALTY Chaperone protein skp;        | 5  |                | VANDQSIDL VVDANTVAYNSSDV K          | 126 | 24 | 4  | 12.7   | b5b15*b15y9                               | 2537.24 | 84.277  | 30374  | 3 | 846.42  | 2.69   |
| [P0A1Z2]SKP_SALTY Chaperone protein skp;        | 6  |                | AAELQKMETDLQSK                      | 53  | 14 | 4  | 27.57  | b9b12y9y12                                | 1591.78 | 51.252  | 129455 | 3 | 531.27  | -10.51 |
| [P0A1Z2]SKP_SALTY Chaperone protein skp;        | 7  |                | KVANDQSIDL VVDANTVAYNSSD VK         | 125 | 25 | 3  | 12.4   | b4b8y5                                    | 2665.33 | 87.388  | 5593   | 4 | 667.09  | -1.47  |
| [P0A1Z2]SKP_SALTY Chaperone protein skp;        | 8  |                | LQSMKAGSDR                          | 70  | 10 | 3  | 33.89  | y4y6y7                                    | 1092.54 | 87.738  | 1612   | 1 | 1092.54 | -6.26  |
| [P0A1Z2]SKP_SALTY Chaperone protein skp;        | 9  |                | QAFEKDR                             | 98  | 7  | 0  | 1.21   |                                           | 893.45  | 17.682  | 3911   | 2 | 447.23  | -2.87  |
| [P66593]RS6_SALTY 30S ribosomal protein S6;     | 1  |                | YSAAITGAEGK                         | 24  | 11 | 12 | 84.95  | b2*b2b3*b3b4y2y5y6y7y9y10y11              | 1067.53 | 33.378  | 88414  | 2 | 534.27  | -6.40  |
| [P66593]RS6_SALTY 30S ribosomal protein S6;     | 2  |                | FNDAVIR                             | 79  | 7  | 6  | 50.67  | b3y4y5y6y7*y7                             | 834.44  | 42.105  | 72246  | 2 | 417.72  | -13.46 |
| [P66593]RS6_SALTY 30S ribosomal protein S6;     | 3  |                | HAVTEASPMVK                         | 93  | 11 | 7  | 47.72  | b2b3b8y4y9y10y11                          | 1169.59 | 30.829  | 40317  | 2 | 585.30  | -4.07  |
| [P66593]RS6_SALTY 30S ribosomal protein S6;     | 4  |                | LEDWGR                              | 38  | 6  | 2  | 26.84  | y3y4                                      | 775.37  | 38.406  | 11906  | 2 | 388.19  | -7.56  |
| [P66593]RS6_SALTY 30S ribosomal protein S6;     | 5  |                | SMVMR                               | 86  | 5  | 1  | 13.22  | b3                                        | 623.29  | 30.911  | 5636   | 1 | 623.29  | -13.22 |
| [P66593]RS6_SALTY 30S ribosomal protein S6;     | 6  |                | MRHYEIVFMVHPDQSEQVPGMIE R           | 0   | 24 | 3  | 19.01  | b3b7b10                                   | 2928.36 | 66.833  | 10675  | 3 | 976.79  | -11.67 |
| [P66593]RS6_SALTY 30S ribosomal protein S6;     | 7  |                | YSAAITGAEGKIHR                      | 24  | 14 | 4  | 27.06  | b3b4*b4b9                                 | 1473.80 | 136.386 | 1778   | 2 | 737.40  | 14.00  |
| [P66593]RS6_SALTY 30S ribosomal protein S6;     | 8  |                | AVTEASPMVK                          | 94  | 10 | 0  | 2.43   |                                           | 1032.55 | 30.754  | 2172   | 2 | 516.78  | 6.38   |
| [P26982]DEGP_SALTY Protease do;                 | 1  |                | AGDVITSLNGKPISSF AALR               | 332 | 20 | 11 | 63.65  | b3b4b5*b5b10y1y2y4y7y9y15                 | 2017.08 | 74.718  | 98619  | 3 | 673.03  | -11.86 |
| [P26982]DEGP_SALTY Protease do;                 | 2  |                | GYVVTTNNH VVDNASVIK                 | 124 | 17 | 7  | 36.13  | b2b3y7y10y14y15y17                        | 1828.93 | 50.077  | 43782  | 3 | 610.32  | -11.41 |
| [P26982]DEGP_SALTY Protease do;                 | 3  |                | SDIALIQINPK                         | 160 | 12 | 10 | 96.81  | b3b4b5y3y4*y4y5y6y7y12                    | 1339.76 | 63.961  | 43135  | 2 | 670.38  | -2.00  |

|                                                            |    |                                                      |                                             |     |    |    |        |                                                         |         |         |        |   |         |        |
|------------------------------------------------------------|----|------------------------------------------------------|---------------------------------------------|-----|----|----|--------|---------------------------------------------------------|---------|---------|--------|---|---------|--------|
| P26982 DEGP_SALTY Protease do;                             | 4  |                                                      | GAFVSQVMPNSSAAK                             | 313 | 15 | 11 | 77.53  | b3b4b5b7b8y2y8y10y11*y11y15                             | 1493.74 | 53.237  | 40645  | 2 | 747.37  | -1.96  |
| P26982 DEGP_SALTY Protease do;                             | 5  |                                                      | AQVGTMPVGSK                                 | 352 | 11 | 11 | 73.95  | b2*b2b5y3y5*y5y6y8*y8y9y11                              | 1074.56 | 34.802  | 40012  | 2 | 537.78  | -5.34  |
| P26982 DEGP_SALTY Protease do;                             | 6  |                                                      | NLTSQMVEYGQVK                               | 275 | 13 | 13 | 71.74  | b2b6b8b13y5y6*y6y8y9*y9y11*y11y13                       | 1496.75 | 57.686  | 38970  | 2 | 748.88  | 4.00   |
| P26982 DEGP_SALTY Protease do;                             | 7  |                                                      | VGDYTVAIGNPFLGETVTSGIVS<br>ALGR             | 186 | 28 | 19 | 102.78 | b2b3b5*b5b6*b6b7*b7b8y1y2y3y4y5y6y8y10y14y28            | 2750.43 | 116.233 | 32979  | 3 | 917.48  | -2.22  |
| P26982 DEGP_SALTY Protease do;                             | 8  |                                                      | GELGIMGTELNSELAk                            | 289 | 16 | 5  | 35.43  | b4b5b10y11y13                                           | 1661.85 | 74.920  | 8118   | 2 | 831.43  | 2.35   |
| P26982 DEGP_SALTY Protease do;                             | 9  |                                                      | AITVNLELQQSSQSQVDSSTIFSGI<br>EGAEMSNK       | 373 | 33 | 3  | 22.19  | b6y6y7                                                  | 3498.65 | 106.632 | 3703   | 3 | 1166.89 | -10.89 |
| P26982 DEGP_SALTY Protease do;                             | 10 |                                                      | SGLNVENYENFIQTDAAINR                        | 214 | 20 | 5  | 14.37  | b3*b3b6y12*y12                                          | 2268.10 | 66.743  | 3667   | 3 | 756.71  | 6.57   |
| P26982 DEGP_SALTY Protease do;                             | 11 |                                                      | VMPSVVSINVEGSTTVNTPR                        | 48  | 20 | 4  | 22.61  | b4b7b16y5                                               | 2087.09 | 87.495  | 2657   | 3 | 696.37  | 6.32   |
| P26982 DEGP_SALTY Protease do;                             | 12 |                                                      | ILDSKPSVLALNIQR                             | 450 | 15 | 5  | 29.43  | b3*b3y3y4y10                                            | 1666.96 | 65.148  | 39813  | 3 | 556.32  | -17.65 |
| P26982 DEGP_SALTY Protease do;                             | 13 | Carbamidomethyl+C(13)<br>;Carbamidomethyl+C(25)<br>) | NFQQFFGDDSPFCQDGSFPQNSPF<br>CQGGGNGGNGGQQQK | 71  | 39 | 5  | 15.66  | b5b8y4y8y14                                             | 4240.78 | 90.591  | 5761   | 3 | 1414.27 | 7.37   |
| P26982 DEGP_SALTY Protease do;                             | 14 |                                                      | NIAELR                                      | 443 | 6  | 3  | 40.06  | b4y3y4                                                  | 715.41  | 33.833  | 4461   | 2 | 358.21  | -5.37  |
| P26982 DEGP_SALTY Protease do;                             | 15 |                                                      | VDAQRGAfVSQVMPNSSAAK                        | 308 | 20 | 8  | 38.76  | b6*b6*b6b7*b7b11y5y6                                    | 2063.03 | 48.289  | 10973  | 4 | 516.51  | -3.79  |
| P26982 DEGP_SALTY Protease do;                             | 16 |                                                      | RGELGIMGTELNSELAk                           | 288 | 17 | 4  | 27.39  | b15y6y9y10                                              | 1817.93 | 77.199  | 7616   | 2 | 909.47  | -5.77  |
| P26982 DEGP_SALTY Protease do;                             | 17 |                                                      | GAFVSQVMPNSSAAKAGIK                         | 313 | 19 | 4  | 24.11  | b7*b7b8b10                                              | 1862.98 | 100.338 | 4504   | 2 | 931.99  | 1.25   |
| P26982 DEGP_SALTY Protease do;                             | 18 |                                                      | ILDSKPSVLALNIQRGDSSIYLLMQ                   | 450 | 25 | 4  | 18.62  | b11b14*b14b16                                           | 2774.53 | 136.857 | 3654   | 2 | 1387.77 | 7.30   |
| P26982 DEGP_SALTY Protease do;                             | 19 |                                                      | NLTSQMVEYGQVKR                              | 275 | 14 | 3  | 19.28  | b7b11y10                                                | 1652.83 | 83.258  | 3120   | 2 | 826.92  | -4.58  |
| P26982 DEGP_SALTY Protease do;                             | 20 |                                                      | GELGIMGTELNSELAkAMK                         | 289 | 19 | 6  | 49.49  | b3b5b9b13b17y14                                         | 1992.03 | 93.543  | 2005   | 3 | 664.68  | 8.33   |
| P26982 DEGP_SALTY Protease do;                             | 21 | Phosphoryl.STY(8)                                    | GELGIMGTELNSELAk                            | 289 | 16 | 3  | 24.86  | y8y10_HPO3<br>y10y13_HPO3_y13                           | 1741.81 | 90.734  | 2832   | 2 | 871.41  | 5.47   |
| P26982 DEGP_SALTY Protease do;                             | 22 | Oxidation+M(8)                                       | GAFVSQVMPNSSAAK                             | 313 | 15 | 3  | 18.13  | b6b8y8                                                  | 1509.75 | 39.117  | 15723  | 2 | 755.38  | 9.62   |
| P26982 DEGP_SALTY Protease do;                             | 23 | Oxidation+M(6)                                       | GELGIMGTELNSELAk                            | 289 | 16 | 5  | 17.15  | b7y3y10*y10*y10                                         | 1677.82 | 62.917  | 9091   | 2 | 839.41  | -8.88  |
| P26982 DEGP_SALTY Protease do;                             | 24 |                                                      | NLTSQMVEYGQV                                | 275 | 12 | 0  | 3.24   |                                                         | 1368.65 | 57.634  | 224310 | 2 | 684.83  | 2.05   |
| P0A2C5 RBSB_SALTY D-ribose-binding<br>periplasmic protein; | 1  |                                                      | ILLINPTDSDAVGNAVK                           | 84  | 17 | 19 | 127.23 | b2b3b4b5y2y5y9y10y11*y11y12*y12y13*y13y14*y14*y14y15y17 | 1739.96 | 70.662  | 105741 | 2 | 870.48  | 0.84   |
| P0A2C5 RBSB_SALTY D-ribose-binding<br>periplasmic protein; | 2  |                                                      | IPVITLDR                                    | 107 | 8  | 10 | 75.74  | b2b3y1y3*y3y4y5y6y7y8                                   | 926.56  | 61.810  | 76603  | 2 | 463.78  | -12.05 |
| P0A2C5 RBSB_SALTY D-ribose-binding<br>periplasmic protein; | 3  |                                                      | LAATIAQLPDQIGAK                             | 253 | 15 | 14 | 118.89 | b1b3b4*b4y3y4y7y8y9*y9y10y11y13y15                      | 1509.86 | 66.212  | 52682  | 2 | 755.43  | -2.75  |
| P0A2C5 RBSB_SALTY D-ribose-binding<br>periplasmic protein; | 4  |                                                      | VIELQGIAGTSAAR                              | 150 | 14 | 11 | 75.83  | b1b2b3y6y7y9y10y11*y11y12y14                            | 1385.77 | 58.970  | 30687  | 2 | 693.39  | 0.18   |
| P0A2C5 RBSB_SALTY D-ribose-binding<br>periplasmic protein; | 5  |                                                      | GLNVMQNLTLAHPDVQAVFAQN<br>DEMALGALR         | 193 | 31 | 14 | 55.57  | b2b3b4*b4b5b11b22y2y4y9y11*y11y12y31                    | 3336.69 | 102.478 | 22688  | 3 | 1112.90 | 1.02   |
| P0A2C5 RBSB_SALTY D-ribose-binding<br>periplasmic protein; | 6  |                                                      | IAGDYIAK                                    | 135 | 8  | 5  | 40.86  | y1y3y6y7y8                                              | 850.46  | 35.747  | 18422  | 2 | 425.73  | -11.20 |

|                                                          |    |                       |                                   |     |    |    |       |                                                |         |         |       |   |         |        |
|----------------------------------------------------------|----|-----------------------|-----------------------------------|-----|----|----|-------|------------------------------------------------|---------|---------|-------|---|---------|--------|
| [P0A2C5]RBSB_SALTY D-ribose-binding periplasmic protein; | 7  |                       | ELANVQDLTVR                       | 70  | 11 | 6  | 52.49 | b4b7b10y3y6y11                                 | 1257.67 | 57.645  | 15753 | 2 | 629.34  | -9.32  |
| [P0A2C5]RBSB_SALTY D-ribose-binding periplasmic protein; | 8  |                       | DTIALVISTLNNPFFVSLKDGAQK EADK     | 26  | 28 | 5  | 24.92 | b14y3y8y12y25                                  | 3034.57 | 114.300 | 9706  | 4 | 759.40  | -13.03 |
| [P0A2C5]RBSB_SALTY D-ribose-binding periplasmic protein; | 9  |                       | FNVLASQPADFDR                     | 178 | 13 | 3  | 25.41 | b7y10y11                                       | 1479.73 | 105.070 | 1619  | 2 | 740.37  | 5.03   |
| [P0A2C5]RBSB_SALTY D-ribose-binding periplasmic protein; | 10 |                       | QATKGDVVSHIASDNVLGGK              | 115 | 20 | 4  | 14.37 | b6*b6b12y10                                    | 1996.03 | 51.413  | 50377 | 3 | 666.01  | -8.87  |
| [P0A2C5]RBSB_SALTY D-ribose-binding periplasmic protein; | 11 |                       | FNVLASQPADFDRTK                   | 178 | 15 | 3  | 24.15 | b3y11y12                                       | 1708.84 | 54.845  | 4154  | 3 | 570.29  | -13.72 |
| [P0A2C5]RBSB_SALTY D-ribose-binding periplasmic protein; | 12 |                       | ADVMVVGFDGTPDGEKAVK               | 231 | 19 | 5  | 36.28 | b3b4b5°b5y9                                    | 1934.97 | 60.171  | 1793  | 2 | 967.99  | 7.32   |
| [P0A2C5]RBSB_SALTY D-ribose-binding periplasmic protein; | 13 | Phosphoryl STY(11)    | LATLVSAVALSATVSANAMAK             | 5   | 21 | 4  | 13.87 | b15y9y12°y12                                   | 2069.08 | 73.886  | 7597  | 3 | 690.37  | 11.09  |
| [P0A2C5]RBSB_SALTY D-ribose-binding periplasmic protein; | 14 | Phosphoryl STY(9)     | ELANVQDLTVR                       | 70  | 11 | 11 | 99.13 | b7b8b9y3_H3PO4 y3°y3y4y7°y7y8°y8y9             | 1337.63 | 136.297 | 1591  | 1 | 1337.63 | -8.03  |
| [P0A2C5]RBSB_SALTY D-ribose-binding periplasmic protein; | 15 | Oxidation+M(4)        | ADVMVVGFDGTPDGEK                  | 231 | 16 | 5  | 37.87 | b6y4y6y11y12                                   | 1652.77 | 66.193  | 2548  | 3 | 551.59  | 11.74  |
| [P0A2C5]RBSB_SALTY D-ribose-binding periplasmic protein; | 16 |                       | AGDYIAK                           | 136 | 7  | 0  | 1.21  |                                                | 737.38  | 35.729  | 3191  | 1 | 737.38  | -4.47  |
| [P0A1W6]LIVK_SALTY Leucine-ecific-binding protein;       | 1  |                       | QQYGEGLAR                         | 170 | 9  | 5  | 38.26 | y1y4y6y7y9                                     | 1021.50 | 32.930  | 67933 | 2 | 511.25  | -5.92  |
| [P0A1W6]LIVK_SALTY Leucine-ecific-binding protein;       | 2  |                       | TAGLDSSQGPTAAK                    | 139 | 14 | 16 | 84.11 | b5°b5b10b14y6°y6y8y9°y9*y9y10°y10y11y12°y12y14 | 1303.65 | 28.784  | 49094 | 2 | 652.33  | -2.43  |
| [P0A1W6]LIVK_SALTY Leucine-ecific-binding protein;       | 3  |                       | LQKENIDFVYYGGYYPEMGMLR            | 211 | 23 | 7  | 28.23 | b10b14y6*y6y8*y8y9                             | 2814.33 | 84.857  | 45208 | 3 | 938.78  | 2.60   |
| [P0A1W6]LIVK_SALTY Leucine-ecific-binding protein;       | 4  |                       | TQFMGPEGVGNASLSNIAGGAAE GMLVTMPK  | 242 | 31 | 13 | 52.19 | b2b3b4b9y1y3y4y8y9°y9y13°y13y31                | 3035.48 | 92.364  | 38115 | 3 | 1012.50 | 6.76   |
| [P0A1W6]LIVK_SALTY Leucine-ecific-binding protein;       | 5  |                       | GYQYIMR                           | 132 | 7  | 9  | 37.45 | b2b5*b5b7y1y2y4y5y7                            | 930.46  | 47.570  | 30620 | 2 | 465.73  | 9.71   |
| [P0A1W6]LIVK_SALTY Leucine-ecific-binding protein;       | 6  |                       | TQFMGPEGVGNASLSNIAGGAAE GMLVTMPKR | 242 | 32 | 6  | 15.86 | b2b3°b3b6b16y14                                | 3191.61 | 120.942 | 19373 | 3 | 1064.54 | 14.61  |
| [P0A1W6]LIVK_SALTY Leucine-ecific-binding protein;       | 7  | Carbamidomethyl+C(10) | LVGVEYDDACDPK                     | 66  | 13 | 3  | 20.63 | b10y9y11                                       | 1480.66 | 46.945  | 11283 | 2 | 740.83  | -0.08  |
| [P0A1W6]LIVK_SALTY Leucine-ecific-binding protein;       | 8  |                       | QGNANIVFFDGITAGEK                 | 186 | 17 | 3  | 23.3  | b6b7y3                                         | 1780.88 | 64.534  | 8921  | 3 | 594.30  | -4.52  |
| [P0A1W6]LIVK_SALTY Leucine-ecific-binding protein;       | 9  |                       | KDPSGPYVWITYAAVQSLATAMT R         | 292 | 24 | 4  | 16.86 | b6b17y5y12                                     | 2626.35 | 81.248  | 5997  | 3 | 876.12  | 6.23   |
| [P0A1W6]LIVK_SALTY Leucine-ecific-binding protein;       | 10 |                       | YILETVKPQR                        | 153 | 10 | 6  | 73.54 | b4b8b9y4y6y9                                   | 1246.69 | 45.561  | 56285 | 3 | 416.24  | -16.45 |
| [P0A1W6]LIVK_SALTY Leucine-ecific-binding protein;       | 11 |                       | VAIVGAMSGPVAQWGDMEFNGA R          | 27  | 23 | 3  | 22.08 | b11y5y6                                        | 2363.10 | 57.843  | 4210  | 3 | 788.37  | -11.67 |
| [P0A1W6]LIVK_SALTY Leucine-ecific-binding protein;       | 12 |                       | ENIDFVYYGGYYPEMGMLR               | 214 | 20 | 5  | 25.24 | b5b6°b6b8y7                                    | 2445.13 | 99.925  | 3033  | 3 | 815.71  | 15.68  |
| [P0A1W6]LIVK_SALTY Leucine-ecific-binding protein;       | 13 |                       | DPSGPYVWITYAAVQSLATAMTR           | 293 | 23 | 3  | 13.04 | b10y9y13                                       | 2498.26 | 133.921 | 2741  | 3 | 833.43  | 10.36  |
| [P0A1W6]LIVK_SALTY Leucine-ecific-binding protein;       | 14 |                       | VAIVGAMSGPVAQWGDMEFNGA RQAIK      | 27  | 27 | 4  | 21.9  | b14b15*b15y13                                  | 2803.40 | 115.073 | 10996 | 3 | 935.14  | -2.18  |
| [P0A1W6]LIVK_SALTY Leucine-ecific-binding protein;       | 15 |                       | GDLKGFEFGVFQWHADGSSTVA K          | 346 | 23 | 3  | 13.04 | b9b11y12                                       | 2483.21 | 99.075  | 10771 | 3 | 828.41  | 4.03   |
| [P0A1W6]LIVK_SALTY Leucine-ecific-binding protein;       | 16 |                       | TQFMGPEGVGNASLSNIAGGAAE GMLVTMPKR | 242 | 32 | 3  | 11.14 | b12b22y14                                      | 3191.59 | 106.029 | 8259  | 4 | 798.65  | 9.18   |
| [P0A1W6]LIVK_SALTY Leucine-ecific-binding protein;       | 17 |                       | LQKENIDFVYYGGYYPEMGMLR            | 211 | 23 | 4  | 13.04 | b10y6*y6y18                                    | 2814.37 | 89.788  | 4414  | 3 | 938.79  | 13.88  |
| [Q8ZRP4]DAPD_SALTY 2                                     | 1  |                       | MQQLQNVIETAFER                    | 0   | 14 | 9  | 56.71 | b3b12y1y3y7y9y12*y12y14                        | 1706.86 | 85.769  | 53792 | 2 | 853.93  | 2.43   |
| [Q8ZRP4]DAPD_SALTY 2                                     | 2  |                       | EAVNQVISLLDSGALR                  | 28  | 16 | 6  | 50.32 | y4y5y6y9y13y16                                 | 1684.93 | 91.893  | 42502 | 2 | 842.97  | 1.45   |

|                                                                            |    |                                           |                                         |     |    |    |        |                                        |         |         |        |   |         |        |
|----------------------------------------------------------------------------|----|-------------------------------------------|-----------------------------------------|-----|----|----|--------|----------------------------------------|---------|---------|--------|---|---------|--------|
| Q8ZRP4 DAPD_SALTY 2                                                        | 3  |                                           | INDNQVIDGAESR                           | 68  | 13 | 13 | 102.65 | b3b4b7°b7y5y6y7y8y9°y9*y9y10y13        | 1430.69 | 41.154  | 29037  | 2 | 715.85  | 1.79   |
| Q8ZRP4 DAPD_SALTY 2                                                        | 4  |                                           | FADYDEAR                                | 89  | 8  | 4  | 51.07  | b3b4y4y6                               | 986.42  | 34.487  | 13615  | 2 | 493.71  | -1.73  |
| Q8ZRP4 DAPD_SALTY 2                                                        | 5  | Carbamidomethyl+C(30)                     | NTVLMPSYVNIGAYYDEGTMVD<br>TWATVGSQAQIGK | 119 | 35 | 4  | 10.93  | b12°b12b19y13                          | 3747.81 | 98.747  | 3601   | 4 | 937.71  | 11.66  |
| Q8ZRP4 DAPD_SALTY 2                                                        | 6  |                                           | VPMKFADYDEAR                            | 85  | 12 | 4  | 22.27  | b5b11y9°y9                             | 1441.67 | 47.678  | 19103  | 2 | 721.34  | -4.83  |
| Q8ZRP4 DAPD_SALTY 2                                                        | 7  |                                           | IYDRETGEVHYGR                           | 213 | 13 | 5  | 41.33  | b3b12y6y7y9                            | 1594.77 | 57.509  | 19002  | 3 | 532.26  | 6.58   |
| Q8ZRP4 DAPD_SALTY 2                                                        | 8  |                                           | MQQLQNVIAFAFERR                         | 0   | 15 | 3  | 24.15  | b5y10y11                               | 1862.93 | 137.695 | 4734   | 2 | 931.97  | -11.93 |
| Q9L4T0 LUXS_SALTY S-<br>ribosylhomocysteine lyase;                         | 1  |                                           | TMNTPHGDAITVFDLR                        | 23  | 16 | 5  | 24.86  | b2y2y4y6y10                            | 1787.85 | 71.107  | 47357  | 3 | 596.62  | -11.61 |
| Q9L4T0 LUXS_SALTY S-<br>ribosylhomocysteine lyase;                         | 2  | Carbamidomethyl+C(15)                     | VQDQNQIPELNVYQCGTYQMHS<br>LSEAQDIAR     | 113 | 31 | 11 | 61.98  | b7b12b14y3y4y8y9y10y19<br>y24y31       | 3635.71 | 74.909  | 20754  | 3 | 1212.58 | 7.72   |
| Q9L4T0 LUXS_SALTY S-<br>ribosylhomocysteine lyase;                         | 3  | Carbamidomethyl+C(18)                     | DHLNGNGVEIIDISPMGCR                     | 65  | 19 | 5  | 28.47  | b2b3b6y10y11                           | 2096.96 | 66.640  | 5096   | 3 | 699.66  | -11.41 |
| Q9L4T0 LUXS_SALTY S-<br>ribosylhomocysteine lyase;                         | 4  |                                           | PLLDsFAVDHTR                            | 1   | 12 | 6  | 61.13  | y4y5y9y10°y10y11                       | 1370.68 | 62.172  | 60711  | 3 | 457.57  | -17.81 |
| Q9L4T0 LUXS_SALTY S-<br>ribosylhomocysteine lyase;                         | 5  |                                           | TGFYMSLIGTPDEQR                         | 84  | 15 | 4  | 24.15  | b13y3*y3y4                             | 1714.84 | 76.371  | 8576   | 2 | 857.92  | 15.16  |
| Q9L4T0 LUXS_SALTY S-<br>ribosylhomocysteine lyase;                         | 6  |                                           | VADAWK                                  | 99  | 6  | 2  | 26.84  | b3b4                                   | 689.37  | 36.678  | 6385   | 1 | 689.37  | 14.08  |
| Q9L4T0 LUXS_SALTY S-<br>ribosylhomocysteine lyase;                         | 7  |                                           | MPLLDsFAVDHTR                           | 0   | 13 | 4  | 20.63  | b3b6°b6y6                              | 1501.76 | 46.166  | 4696   | 3 | 501.26  | 7.56   |
| Q9L4T0 LUXS_SALTY S-<br>ribosylhomocysteine lyase;                         | 8  |                                           | EVMPEK                                  | 45  | 6  | 1  | 13.62  | b3                                     | 732.35  | 71.982  | 1641   | 1 | 732.35  | -8.75  |
| Q9L4T0 LUXS_SALTY S-<br>ribosylhomocysteine lyase;                         | 9  |                                           | EVMPEKGIHTLEHLFAGFMR                    | 45  | 20 | 3  | 21.16  | y3y5y11                                | 2342.19 | 86.265  | 3373   | 3 | 781.40  | 5.00   |
| Q9L4T0 LUXS_SALTY S-<br>ribosylhomocysteine lyase;                         | 10 | Oxidation+M(2)                            | TMNTPHGDAITVFDLR                        | 23  | 16 | 3  | 23.69  | b14y13y14                              | 1803.88 | 81.323  | 4844   | 2 | 902.45  | 8.05   |
| Q9L4T0 LUXS_SALTY S-<br>ribosylhomocysteine lyase;                         | 11 | Carbamidomethyl+C(18)<br>;Oxidation+M(16) | DHLNGNGVEIIDISPMGCR                     | 65  | 19 | 3  | 24.11  | b3b10b11                               | 2112.98 | 63.601  | 2503   | 3 | 705.00  | 2.08   |
| P0A251 AHPC_SALTY Alkyl<br>hydroperoxide reductase subunit C;              | 1  | Carbamidomethyl+C(13)                     | AAQYVAAHPEVCPAK                         | 153 | 16 | 7  | 55.3   | b3b4y3y5y8y11y16                       | 1668.79 | 35.305  | 42622  | 3 | 556.94  | -13.02 |
| P0A251 AHPC_SALTY Alkyl<br>hydroperoxide reductase subunit C;              | 2  |                                           | YAMIGDPTGALTR                           | 93  | 13 | 8  | 62.72  | b2b4y5y7y8y10y11y13                    | 1365.68 | 62.920  | 35770  | 2 | 683.34  | -3.22  |
| P0A251 AHPC_SALTY Alkyl<br>hydroperoxide reductase subunit C;              | 3  |                                           | ATFVVDPPQGIHIAIEVTAEIGR                 | 120 | 23 | 13 | 94.56  | b3°b3b4°b4b9b10y2y5y6y7<br>y8y9y23     | 2384.27 | 128.461 | 28509  | 3 | 795.43  | -4.40  |
| P0A251 AHPC_SALTY Alkyl<br>hydroperoxide reductase subunit C;              | 4  |                                           | NGEFIEVTEKDTEGR                         | 17  | 15 | 4  | 26.21  | y4y6°y6y8                              | 1723.82 | 49.815  | 5221   | 2 | 862.42  | 6.51   |
| P0A251 AHPC_SALTY Alkyl<br>hydroperoxide reductase subunit C;              | 5  |                                           | AWHSSSETIAK                             | 80  | 11 | 4  | 27.31  | b4y7°y7y8                              | 1216.60 | 60.417  | 2004   | 2 | 608.81  | 7.53   |
| P0A251 AHPC_SALTY Alkyl<br>hydroperoxide reductase subunit C;              | 6  |                                           | EGEATLAPSLDLVGKI                        | 171 | 16 | 6  | 45.65  | b6b7b11°b11b12y3                       | 1612.87 | 84.747  | 39035  | 2 | 806.94  | -7.95  |
| P0A251 AHPC_SALTY Alkyl<br>hydroperoxide reductase subunit C;              | 7  | Carbamidomethyl+C(13)                     | AAQYVAAHPEVCPAKWK                       | 153 | 18 | 3  | 15.58  | b8b10y10                               | 1982.99 | 46.831  | 2406   | 3 | 661.67  | -1.60  |
| Q7CQJ0 SRA_SALTY Stationary-phase-<br>induced ribosome-associated protein; | 1  |                                           | VVTEGDTSSVVNNPTGR                       | 22  | 17 | 8  | 66.37  | b13y3y4y5y6y8y13y17                    | 1731.86 | 39.321  | 11679  | 2 | 866.43  | 3.88   |
| Q7CQJ0 SRA_SALTY Stationary-phase-<br>induced ribosome-associated protein; | 2  |                                           | VVTEGDTSSVVNNPTGRK                      | 22  | 18 | 6  | 22.98  | b1b2b5y6y7*y7                          | 1859.92 | 35.478  | 2619   | 3 | 620.65  | -12.60 |
| Q7CQJ0 SRA_SALTY Stationary-phase-<br>induced ribosome-associated protein; | 3  |                                           | ISNQR                                   | 16  | 5  | 1  | 13.22  | y3                                     | 617.34  | 103.525 | 4032   | 1 | 617.34  | 1.88   |
| Q7CQJ0 SRA_SALTY Stationary-phase-<br>induced ribosome-associated protein; | 4  |                                           | KVVTEGDTSSVVNNPTGR                      | 21  | 18 | 12 | 108.86 | b10°b10b11°b11y4y5y6y7y<br>8y9y13y15   | 1859.92 | 36.337  | 112403 | 3 | 620.64  | -14.11 |
| P66692 RPIA_SALTY Ribose-5-phohate<br>isomerase A;                         | 1  |                                           | AVGWAALQYVQPGTIVGVGTGST<br>AAHFIDALGTMK | 8   | 35 | 14 | 77.84  | b3b5b6b7b9b11y3y4y6y11<br>y17y19y24y35 | 3487.82 | 107.309 | 58356  | 3 | 1163.28 | 3.36   |

|                                                  |    |                       |                                                         |     |    |    |        |                                            |         |         |       |   |         |        |
|--------------------------------------------------|----|-----------------------|---------------------------------------------------------|-----|----|----|--------|--------------------------------------------|---------|---------|-------|---|---------|--------|
| [P66692]RPIA_SALTY Ribose-5-phohate isomerase A; | 2  |                       | GADVALIGTPDGVK                                          | 201 | 14 | 6  | 31.53  | b6y2y3y5y7y14                              | 1312.70 | 57.346  | 22404 | 2 | 656.86  | -5.67  |
| [P66692]RPIA_SALTY Ribose-5-phohate isomerase A; | 3  | Carbamidomethyl+C(3)  | FICIADASK                                               | 112 | 9  | 8  | 61.68  | b2b5y2y3y5y6y7y9                           | 1024.51 | 51.028  | 20578 | 2 | 512.76  | -3.46  |
| [P66692]RPIA_SALTY Ribose-5-phohate isomerase A; | 4  |                       | GLGIHVFDLNEVDSLGIYVDGADE<br>INGHMQMIK                   | 61  | 33 | 5  | 13.29  | b11b16y6y10°y10                            | 3599.78 | 95.956  | 8923  | 3 | 1200.60 | 9.29   |
| [P66692]RPIA_SALTY Ribose-5-phohate isomerase A; | 5  |                       | GGGAALTR                                                | 94  | 8  | 3  | 36.09  | b3y5y7                                     | 702.38  | 34.994  | 2302  | 1 | 702.38  | -9.04  |
| [P66692]RPIA_SALTY Ribose-5-phohate isomerase A; | 6  |                       | QVDILGKFPLPVEVIPMAR                                     | 121 | 19 | 4  | 23.65  | b3y4y7y9                                   | 2122.19 | 99.855  | 39817 | 3 | 708.07  | -6.79  |
| [P66692]RPIA_SALTY Ribose-5-phohate isomerase A; | 7  |                       | GADVALIGTPDG                                            | 201 | 12 | 0  | 3.64   |                                            | 1085.55 | 57.359  | 3017  | 2 | 543.28  | -0.79  |
| [P0A1H3]EFG_SALTY Elongation factor G;           | 1  |                       | VYSGVVNSGDTVLSNVK                                       | 337 | 17 | 14 | 111.84 | b2b4b5°b5y4y5*y5y9y10y<br>11y12y14y15y17   | 1737.91 | 62.073  | 59148 | 2 | 869.46  | 2.67   |
| [P0A1H3]EFG_SALTY Elongation factor G;           | 2  | Carbamidomethyl+C(11) | VLNNEILVTCGSAFK                                         | 255 | 16 | 6  | 35.43  | b2b12b14y5y8y9                             | 1777.97 | 106.036 | 46765 | 3 | 593.33  | 10.64  |
| [P0A1H3]EFG_SALTY Elongation factor G;           | 3  |                       | SGPLAGYPVVDLGVR                                         | 562 | 15 | 11 | 74.52  | b3°b3b5°b5b7y3y4y8y10y1<br>1y15            | 1499.83 | 76.407  | 39107 | 2 | 750.42  | 2.28   |
| [P0A1H3]EFG_SALTY Elongation factor G;           | 4  |                       | IGEVHDGAATMDWMEQEQR                                     | 39  | 20 | 8  | 36.24  | b3b10b12y3*y3y5y9y20                       | 2331.99 | 62.112  | 23534 | 3 | 778.00  | -1.88  |
| [P0A1H3]EFG_SALTY Elongation factor G;           | 5  |                       | IHAEVPLSEMFGYATQLR                                      | 653 | 18 | 4  | 15.58  | b1b5b11y8                                  | 2062.02 | 90.025  | 23363 | 3 | 688.01  | -11.37 |
| [P0A1H3]EFG_SALTY Elongation factor G;           | 6  |                       | EFNVEANVGKPVAYR                                         | 475 | 16 | 6  | 17.15  | b2b3°b3b11y8y16                            | 1820.91 | 53.293  | 21488 | 3 | 607.64  | -12.20 |
| [P0A1H3]EFG_SALTY Elongation factor G;           | 7  |                       | GQYGHVVIDMYPLEPGSNPK                                    | 512 | 20 | 7  | 60.18  | b4b5b7b10b11y9y10                          | 2201.06 | 70.136  | 21015 | 3 | 734.36  | -5.88  |
| [P0A1H3]EFG_SALTY Elongation factor G;           | 8  |                       | LGANPVPLQLAIGAEEGFTGVVDL<br>VK                          | 161 | 26 | 5  | 15.79  | b4b6y3y12y26                               | 2607.41 | 119.681 | 19982 | 3 | 869.81  | -10.58 |
| [P0A1H3]EFG_SALTY Elongation factor G;           | 9  |                       | YLGGEELTEEEIK                                           | 236 | 13 | 7  | 53.09  | b5b6b7y8°y8y9y13                           | 1509.73 | 89.082  | 11680 | 2 | 755.37  | -1.37  |
| [P0A1H3]EFG_SALTY Elongation factor G;           | 10 |                       | REFNVEANVGKPVAYREAIR                                    | 474 | 21 | 5  | 26.73  | b6b11b15y7y9                               | 2446.29 | 64.484  | 9032  | 5 | 490.06  | -3.49  |
| [P0A1H3]EFG_SALTY Elongation factor G;           | 11 |                       | AINWNDADQGVTFEYEDIPADMQ<br>DLANEWHQNLIESAAEASEELME<br>K | 189 | 47 | 16 | 59.5   | b2b3b5b6b11*b11y1y2°y2<br>y3y4y5y7y8y10y29 | 5380.40 | 125.675 | 7250  | 4 | 1345.86 | 3.63   |
| [P0A1H3]EFG_SALTY Elongation factor G;           | 12 |                       | VEVETPEENTGDVIGDLR                                      | 618 | 19 | 3  | 14.93  | b7y5y10                                    | 2058.97 | 79.992  | 5151  | 4 | 515.50  | -4.98  |
| [P0A1H3]EFG_SALTY Elongation factor G;           | 13 | Carbamidomethyl+C(20) | AGDIAAAIGLKDVTTGDTLCDPEN<br>PIILER                      | 378 | 30 | 6  | 21.98  | b6b7°b7y2°y2y11                            | 3138.56 | 121.118 | 2741  | 3 | 1046.86 | -12.52 |
| [P0A1H3]EFG_SALTY Elongation factor G;           | 14 |                       | VVGQIK                                                  | 153 | 6  | 1  | 13.62  | b4                                         | 643.41  | 45.085  | 12139 | 1 | 643.41  | -3.23  |
| [P0A1H3]EFG_SALTY Elongation factor G;           | 15 |                       | GIQEQLK                                                 | 555 | 7  | 3  | 37.45  | b5y3y4                                     | 815.46  | 51.998  | 9662  | 1 | 815.46  | -4.87  |
| [P0A1H3]EFG_SALTY Elongation factor G;           | 16 | Carbamidomethyl+C(10) | VLDGAVMVYCAVGGVQPQSETV<br>WR                            | 104 | 24 | 3  | 12.7   | b5b16y3                                    | 2621.29 | 85.766  | 6897  | 3 | 874.43  | 1.68   |
| [P0A1H3]EFG_SALTY Elongation factor G;           | 17 |                       | LHFGSYHDVDSSELAFK                                       | 577 | 17 | 3  | 23.71  | b5b10b12                                   | 1951.95 | 84.089  | 5234  | 3 | 651.32  | 17.39  |
| [P0A1H3]EFG_SALTY Elongation factor G;           | 18 |                       | MEFPEPVISIAVEPK                                         | 408 | 15 | 7  | 44.69  | b4b9b12°b12b14°b14y4                       | 1685.86 | 93.539  | 3295  | 2 | 843.43  | -14.70 |
| [P0A1H3]EFG_SALTY Elongation factor G;           | 19 |                       | AGDIAAAIGLK                                             | 378 | 11 | 3  | 27.31  | b3y6y7                                     | 999.58  | 65.308  | 1821  | 2 | 500.29  | -7.33  |
| [P0A1H3]EFG_SALTY Elongation factor G;           | 20 |                       | TTTTTERILFYTGVNHK                                       | 23  | 16 | 4  | 17.15  | b12y3y8*y8                                 | 1880.98 | 48.304  | 50449 | 3 | 627.67  | -1.23  |
| [P0A1H3]EFG_SALTY Elongation factor G;           | 21 |                       | GYEFINDIKGGVIPGEYIPAVDK                                 | 532 | 23 | 4  | 23.13  | b10b11*b11b14                              | 2494.29 | 98.321  | 11788 | 3 | 832.10  | 3.23   |
| [P0A1H3]EFG_SALTY Elongation factor G;           | 22 |                       | HASDDEPFSALAFKIATDPFVGNL<br>TFFR                        | 309 | 28 | 5  | 22.72  | y4y5y12°y12*y12                            | 3113.54 | 88.037  | 7076  | 3 | 1038.52 | -0.16  |

|                                               |    |                       |                                       |     |    |    |       |                                        |         |         |       |   |         |        |
|-----------------------------------------------|----|-----------------------|---------------------------------------|-----|----|----|-------|----------------------------------------|---------|---------|-------|---|---------|--------|
| P0A1H3 EFG_SALTY Elongation factor G;         | 23 |                       | GQSEVTGVKIHAEVPLSEMFY ATQLR           | 643 | 28 | 3  | 17.72 | b8b12b14                               | 3076.56 | 119.950 | 2918  | 3 | 1026.19 | 7.30   |
| P0A1H3 EFG_SALTY Elongation factor G;         | 24 | Carbamidomethyl+C(13) | SMRVLDGAVMVVYCAVGGVQPQS ETVWR         | 101 | 27 | 6  | 21.19 | b8b12°b12y6y12y16                      | 2995.50 | 97.172  | 2057  | 3 | 999.17  | 13.86  |
| P0A1H3 EFG_SALTY Elongation factor G;         | 25 | Phosphoryl.STY(4)     | LAASIAFKEGFK                          | 594 | 12 | 5  | 22.27 | b4_HPO3 b4°b4b8°b8y8                   | 1361.69 | 37.487  | 2942  | 3 | 454.57  | 12.46  |
| P0A1H3 EFG_SALTY Elongation factor G;         | 26 | Phosphoryl STY(15)    | EFNVEANVGKQPQVAYREAIR                 | 475 | 20 | 4  | 25.24 | b10y5y6y11                             | 2370.17 | 115.037 | 2248  | 3 | 790.73  | 7.31   |
| P0A1H3 EFG_SALTY Elongation factor G;         | 27 | Oxidation+M(5)        | GVQAMLDIVIDYLPSPVDVPAIN GILDDGK       | 273 | 30 | 4  | 16.52 | b4b6b9y3                               | 3111.58 | 94.424  | 7465  | 3 | 1037.86 | -5.10  |
| P0A1H3 EFG_SALTY Elongation factor G;         | 28 | Oxidation+M(10)       | IHAEVPLSEMFYATQLR                     | 653 | 18 | 8  | 32.73 | b10b12y8y9°y9*y9y16*y16                | 2078.03 | 111.821 | 3157  | 2 | 1039.52 | -3.29  |
| P0A1H3 EFG_SALTY Elongation factor G;         | 29 |                       | SGPLAGYP                              | 562 | 8  | 0  | 4.05  |                                        | 761.38  | 76.425  | 1942  | 1 | 761.38  | 0.08   |
| Q7CPE1 ATPA_SALTY ATP synthase subunit alpha; | 1  |                       | IGSFEAALLAYVDRDHAPLMQEIN QSGGYNDEIEGK | 463 | 36 | 9  | 54.19 | b5b6b7b8b22y2y5y7y11                   | 3950.89 | 95.202  | 68560 | 4 | 988.48  | 1.67   |
| Q7CPE1 ATPA_SALTY ATP synthase subunit alpha; | 2  |                       | MQLNSTEISELIK                         | 0   | 13 | 8  | 45.52 | b2b3b13y3y8y10y11y13                   | 1505.79 | 76.699  | 43695 | 2 | 753.40  | 0.65   |
| Q7CPE1 ATPA_SALTY ATP synthase subunit alpha; | 3  |                       | ILEVPVGR                              | 93  | 8  | 4  | 40.86 | y4y5y6y8                               | 882.53  | 52.408  | 37350 | 2 | 441.77  | -12.03 |
| Q7CPE1 ATPA_SALTY ATP synthase subunit alpha; | 4  |                       | GYLADVELAK                            | 453 | 10 | 9  | 40.12 | b2b8°b8y1y2y6y7y9y10                   | 1078.57 | 60.401  | 36021 | 2 | 539.79  | -6.34  |
| Q7CPE1 ATPA_SALTY ATP synthase subunit alpha; | 5  |                       | QYAPMSVAQQLVLFAAER                    | 434 | 19 | 8  | 31.62 | b3°b3b6y2y5y6y16y19                    | 2109.10 | 92.963  | 31804 | 2 | 1055.05 | 8.91   |
| Q7CPE1 ATPA_SALTY ATP synthase subunit alpha; | 6  | Carbamidomethyl+C(7)  | IHGLADCMQGEMISLPGNR                   | 40  | 19 | 13 | 40.86 | b2b3b13°b13y4y6°y6*y6y10°y10*y10y13y19 | 2098.98 | 69.070  | 31541 | 3 | 700.33  | -0.35  |
| Q7CPE1 ATPA_SALTY ATP synthase subunit alpha; | 7  |                       | DSVGAVVMGPYADLAEGMK                   | 68  | 19 | 7  | 53.96 | b5y7y11y12y13y14y19                    | 1909.92 | 83.368  | 29745 | 2 | 955.46  | 7.54   |
| Q7CPE1 ATPA_SALTY ATP synthase subunit alpha; | 8  | Carbamidomethyl+C(1)  | CIYVAIGQK                             | 192 | 9  | 4  | 38.26 | b3b4b6y9                               | 1051.55 | 57.365  | 18373 | 2 | 526.28  | -5.57  |
| Q7CPE1 ATPA_SALTY ATP synthase subunit alpha; | 9  |                       | ELAAFSQFASDLDDATR                     | 401 | 17 | 7  | 42.57 | b5b10b14y5y11y13y17                    | 1856.89 | 88.324  | 17709 | 2 | 928.95  | 10.91  |
| Q7CPE1 ATPA_SALTY ATP synthase subunit alpha; | 10 |                       | QSVDQPVTGYK                           | 139 | 12 | 15 | 93.8  | b4°b4°b4b8b12y4°y4y5*y5y6y7°y7y8y10y12 | 1349.67 | 34.062  | 16008 | 2 | 675.34  | -2.80  |
| Q7CPE1 ATPA_SALTY ATP synthase subunit alpha; | 11 |                       | ELAAFSQFASDLDDATRK                    | 401 | 18 | 5  | 36.98 | b6y6y9y11y13                           | 1984.93 | 83.179  | 13226 | 3 | 662.32  | -13.71 |
| Q7CPE1 ATPA_SALTY ATP synthase subunit alpha; | 12 |                       | GEDALIIYDDLK                          | 252 | 13 | 4  | 20.63 | b12°b12y4y10                           | 1451.72 | 68.259  | 42532 | 2 | 726.36  | -7.23  |
| Q7CPE1 ATPA_SALTY ATP synthase subunit alpha; | 13 |                       | AVDSMIPIGR                            | 151 | 10 | 3  | 26.9  | b7y5y8                                 | 1058.56 | 59.863  | 33031 | 2 | 529.78  | -6.34  |
| Q7CPE1 ATPA_SALTY ATP synthase subunit alpha; | 14 |                       | TALAIIDAINQR                          | 175 | 12 | 4  | 29.47 | y3*y3y4y9                              | 1298.74 | 73.958  | 20444 | 2 | 649.87  | -3.29  |
| Q7CPE1 ATPA_SALTY ATP synthase subunit alpha; | 15 |                       | DHAPLMQEINQSGGYNDEIEGK                | 477 | 22 | 3  | 22.18 | b3b4y3                                 | 2445.14 | 93.424  | 5871  | 4 | 612.04  | 17.87  |
| Q7CPE1 ATPA_SALTY ATP synthase subunit alpha; | 16 |                       | VELLK                                 | 426 | 6  | 1  | 13.62 | y5                                     | 702.43  | 39.922  | 4838  | 2 | 351.72  | -13.12 |
| Q7CPE1 ATPA_SALTY ATP synthase subunit alpha; | 17 |                       | IGSFEAALLAYVDRDHAPLMQEIN QSGGYNDEIEGK | 463 | 36 | 5  | 21.4  | b6y7°y7y8y11                           | 3950.84 | 84.053  | 45693 | 3 | 1317.62 | -10.81 |
| Q7CPE1 ATPA_SALTY ATP synthase subunit alpha; | 18 |                       | VVNTLGAPIDGKGPVDNDGFSAV EAIAPGVIDR    | 106 | 33 | 11 | 51.35 | b16°b16b27y5y6°y6y7y15y16y28°y28       | 3263.71 | 83.998  | 33480 | 3 | 1088.57 | 4.41   |
| Q7CPE1 ATPA_SALTY ATP synthase subunit alpha; | 19 |                       | AARVNADYVEAFTK                        | 300 | 14 | 3  | 24.72 | b13y9y10                               | 1554.77 | 89.738  | 5097  | 2 | 777.89  | -12.80 |
| Q7CPE1 ATPA_SALTY ATP synthase subunit alpha; | 20 |                       | GILDSFKATQSW                          | 501 | 12 | 3  | 22.27 | b6y8y11                                | 1352.70 | 87.826  | 3429  | 2 | 676.85  | 12.45  |
| Q7CPE1 ATPA_SALTY ATP synthase subunit alpha; | 21 | Carbamidomethyl+C(6)  | DSGIKCIYVAIGQK                        | 187 | 14 | 4  | 27.85 | b7b9b13°b13                            | 1551.83 | 84.062  | 2171  | 2 | 776.42  | 6.53   |



|                                                  |    |                 |                                           |     |    |    |       |                                          |         |         |       |   |         |        |
|--------------------------------------------------|----|-----------------|-------------------------------------------|-----|----|----|-------|------------------------------------------|---------|---------|-------|---|---------|--------|
| Q7CPE1 ATPA_SALTY ATP synthase subunit alpha;    | 22 |                 | DSVGAVVMGPYADLAEGMKVK                     | 68  | 21 | 3  | 13.87 | b5b9y14                                  | 2137.09 | 78.367  | 2076  | 2 | 1069.05 | 9.60   |
| Q7CPE1 ATPA_SALTY ATP synthase subunit alpha;    | 23 | Oxidation+M(18) | DSVGAVVMGPYADLAEGMK                       | 68  | 19 | 4  | 23.65 | b8y3y9y11                                | 1925.91 | 66.296  | 2949  | 2 | 963.46  | 6.40   |
| P0A2M5 UPP_SALTY Uracil phohoribosyltransferase; | 1  |                 | AGLGMMEGVLENVPSAR                         | 78  | 17 | 7  | 43.82 | b11b13b14y4y7y12y17                      | 1730.87 | 81.616  | 34906 | 2 | 865.94  | 5.78   |
| P0A2M5 UPP_SALTY Uracil phohoribosyltransferase; | 2  |                 | VLVLVAAPEGIAALEK                          | 155 | 16 | 8  | 58.19 | b1b2b3b4b5b6y9y11                        | 1592.96 | 85.812  | 27151 | 2 | 796.98  | -0.54  |
| P0A2M5 UPP_SALTY Uracil phohoribosyltransferase; | 3  |                 | ITVVPILR                                  | 70  | 8  | 5  | 40.86 | b2*b2y4y5y6                              | 910.60  | 69.752  | 10687 | 2 | 455.80  | -7.37  |
| P0A2M5 UPP_SALTY Uracil phohoribosyltransferase; | 4  |                 | NEETLEPVYPYFQK                            | 103 | 13 | 7  | 25.41 | b1b2*b2b9b10y6y13                        | 1593.77 | 52.156  | 7578  | 2 | 797.39  | -7.66  |
| P0A2M5 UPP_SALTY Uracil phohoribosyltransferase; | 5  |                 | VTIEGWNGPVEIDQIK                          | 51  | 16 | 4  | 17.15 | b1b8b12y11                               | 1797.96 | 75.294  | 3902  | 2 | 899.48  | 10.18  |
| P0A2M5 UPP_SALTY Uracil phohoribosyltransferase; | 6  |                 | ELASEVGSLTYEATADLETEK                     | 29  | 22 | 5  | 26.91 | b13*b13b14y7y15                          | 2369.15 | 91.470  | 2064  | 2 | 1185.08 | -3.09  |
| P0A2M5 UPP_SALTY Uracil phohoribosyltransferase; | 7  |                 | ISVVGMYRNEETLEPVYPYFQK                    | 95  | 21 | 4  | 13.87 | b8b11*b11y17                             | 2499.23 | 72.809  | 11426 | 3 | 833.75  | -10.94 |
| P0A2M5 UPP_SALTY Uracil phohoribosyltransferase; | 8  |                 | ELASEVGSLTYEATADLETEKVT<br>IEGWNGPVEIDQIK | 29  | 38 | 5  | 19.87 | b6b12b15b20y4                            | 4148.04 | 111.906 | 3958  | 3 | 1383.35 | -10.83 |
| P0A2M5 UPP_SALTY Uracil phohoribosyltransferase; | 9  | Oxidation+M(6)  | AGLGMMEGVLENVPSAR                         | 78  | 17 | 5  | 39.14 | b5b10b14b16y13                           | 1746.84 | 63.203  | 13602 | 3 | 582.95  | -6.15  |
| P0A2M5 UPP_SALTY Uracil phohoribosyltransferase; | 10 |                 | MEGVLENVPSAR                              | 83  | 12 | 0  | 4.85  |                                          | 1301.64 | 81.598  | 2770  | 2 | 651.33  | -6.66  |
| P02906 SUBI_SALTY Sulfate-binding protein;       | 1  |                 | YLYSPEGQEIAAK                             | 263 | 13 | 13 | 90.4  | b2b3b4b7*b7b10*b10b11y<br>9y10*y10y11y13 | 1468.73 | 50.579  | 70556 | 2 | 734.87  | 0.58   |
| P02906 SUBI_SALTY Sulfate-binding protein;       | 2  |                 | LFTIDEVFGGWAK                             | 298 | 13 | 8  | 45.52 | b2b3*b3y5y6y8y11y13                      | 1482.76 | 101.754 | 57142 | 2 | 741.88  | -0.49  |
| P02906 SUBI_SALTY Sulfate-binding protein;       | 3  |                 | NVEVLDSGAR                                | 183 | 10 | 9  | 39.33 | b2*b2b3*b3b9b10y5y8y10                   | 1059.53 | 40.029  | 53449 | 2 | 530.27  | -7.60  |
| P02906 SUBI_SALTY Sulfate-binding protein;       | 4  |                 | AVAEAYLK                                  | 255 | 8  | 7  | 40.86 | b1b2y1y4y5y6y8                           | 864.47  | 40.916  | 32309 | 2 | 432.74  | -10.38 |
| P02906 SUBI_SALTY Sulfate-binding protein;       | 5  |                 | GSTNTFVER                                 | 193 | 9  | 9  | 67.7  | b2y3y4*y4y5y6*y6y7y9                     | 1010.48 | 32.269  | 30701 | 2 | 505.75  | -7.13  |
| P02906 SUBI_SALTY Sulfate-binding protein;       | 6  |                 | QATSVINGIEADVTLALAYDVD<br>AIAER           | 66  | 28 | 8  | 49.65 | b2b11y2y3y4y9y10y11                      | 2917.52 | 128.001 | 25028 | 3 | 973.18  | 0.42   |
| P02906 SUBI_SALTY Sulfate-binding protein;       | 7  |                 | WNYLAAWGYALHHNNNDQAK                      | 153 | 20 | 9  | 30.63 | b2b3b4*b4b8y8y12*y12y2<br>0              | 2386.14 | 79.123  | 5883  | 2 | 1193.57 | 10.95  |
| P02906 SUBI_SALTY Sulfate-binding protein;       | 8  |                 | FEIVTPSESILAEPVSVVDK                      | 226 | 21 | 4  | 24.7  | b8y5y10y11                               | 2260.24 | 77.096  | 85781 | 3 | 754.08  | 18.15  |
| P02906 SUBI_SALTY Sulfate-binding protein;       | 9  |                 | QIHDWNDLIKPGSVITPNPK                      | 126 | 21 | 10 | 57.47 | b3*b3b4*b4b9b10y4y5*y5<br>y17            | 2371.23 | 72.907  | 74954 | 4 | 593.56  | -20.39 |
| P02906 SUBI_SALTY Sulfate-binding protein;       | 10 |                 | DIQLLNVSYPTR                              | 20  | 13 | 4  | 29.88 | y4y6y10*y10                              | 1533.77 | 82.458  | 10612 | 2 | 767.39  | -12.02 |
| P02906 SUBI_SALTY Sulfate-binding protein;       | 11 |                 | VVEK                                      | 247 | 4  | 2  | 26.03 | b3y3                                     | 474.29  | 66.621  | 7032  | 1 | 474.29  | 4.95   |
| P02906 SUBI_SALTY Sulfate-binding protein;       | 12 |                 | LPDNSAPYTSTIVFLVR                         | 104 | 17 | 6  | 24.96 | b4b6*b6*b6b7*b7                          | 1893.00 | 86.052  | 2448  | 2 | 947.00  | -5.42  |
| P02906 SUBI_SALTY Sulfate-binding protein;       | 13 |                 | RLPDNSAPYTSTIVFLVR                        | 103 | 18 | 3  | 22.98 | b9b10y5                                  | 2049.09 | 82.723  | 23505 | 3 | 683.70  | -9.41  |
| P02906 SUBI_SALTY Sulfate-binding protein;       | 14 |                 | DIQLLNVSYPDPTRELYEQYNK                    | 20  | 21 | 6  | 18.92 | b10b16y9*y9y15*y15                       | 2601.30 | 136.840 | 3019  | 2 | 1301.15 | 7.23   |
| P02906 SUBI_SALTY Sulfate-binding protein;       | 15 |                 | AVAEAYLKLYLSPEGQEIAAK                     | 255 | 21 | 5  | 37.41 | y7y9*y9y10y11                            | 2314.17 | 114.333 | 2156  | 3 | 772.06  | -9.81  |
| Q7CR87 SURA_SALTY Chaperone surA;                | 1  |                 | LAYDGLNYSTYR                              | 117 | 12 | 5  | 37.25 | b8y4y8y10y12                             | 1435.69 | 58.450  | 58752 | 2 | 718.35  | 3.32   |
| Q7CR87 SURA_SALTY Chaperone surA;                | 2  |                 | IQELPGIFAQALSTAK                          | 235 | 16 | 14 | 41.29 | b2*b2b3*b3*b3b4*b4*b4y<br>1y2y3y12y14y16 | 1686.94 | 89.691  | 58289 | 2 | 843.97  | -1.16  |

|                                                |    |                      |                                               |     |    |    |        |                                                       |         |         |       |   |         |        |
|------------------------------------------------|----|----------------------|-----------------------------------------------|-----|----|----|--------|-------------------------------------------------------|---------|---------|-------|---|---------|--------|
| Q7CR87 SURA_SALTY Chaperone surA;              | 3  |                      | ITDEQLDQAIANIAK                               | 90  | 15 | 11 | 63.64  | b2°b2b3b5b12b14y1y4y5y13y15                           | 1642.87 | 80.088  | 47369 | 2 | 821.94  | 2.23   |
| Q7CR87 SURA_SALTY Chaperone surA;              | 4  |                      | ITVLPQEVDALAK                                 | 149 | 13 | 13 | 62.72  | b2°b2b3°b3y1y2y4y5y9°y9y10y11y13                      | 1396.80 | 70.492  | 45067 | 2 | 698.90  | -1.84  |
| Q7CR87 SURA_SALTY Chaperone surA;              | 5  |                      | LNAGQAGQQLPDDATLR                             | 50  | 17 | 11 | 57.72  | b2b3b7°b7y4y5y7°y7y11y12y17                           | 1767.91 | 50.768  | 44785 | 2 | 884.46  | 4.49   |
| Q7CR87 SURA_SALTY Chaperone surA;              | 6  |                      | QIGTQNDASTELNLSHILALPENP<br>TSEQVNDAQR        | 162 | 35 | 6  | 15.08  | b6y3y6y12*y12y35                                      | 3816.93 | 88.449  | 22707 | 3 | 1272.98 | 8.57   |
| Q7CR87 SURA_SALTY Chaperone surA;              | 7  |                      | GQSQSISVTEVHAR                                | 274 | 14 | 5  | 45.41  | b8y6y8y9y10                                           | 1498.74 | 36.922  | 13455 | 3 | 500.25  | -14.66 |
| Q7CR87 SURA_SALTY Chaperone surA;              | 8  |                      | VAAVVNNGVVLESDDGLMQSV<br>K                    | 27  | 23 | 7  | 28.23  | b3b4b14°b14y8y11*y11                                  | 2343.24 | 90.737  | 11851 | 2 | 1172.12 | 7.40   |
| Q7CR87 SURA_SALTY Chaperone surA;              | 9  |                      | TTFAAAAKEYSQDPGSANQGDDL<br>GWATPDIFDPAFRDALTK | 318 | 41 | 5  | 21.31  | b2b4b9b11b13                                          | 4301.02 | 91.394  | 9817  | 4 | 1076.01 | -3.97  |
| Q7CR87 SURA_SALTY Chaperone surA;              | 10 |                      | QAESIVEEAR                                    | 197 | 10 | 4  | 26.9   | b4b6y5°y5                                             | 1131.58 | 71.534  | 14458 | 2 | 566.29  | 12.62  |
| Q7CR87 SURA_SALTY Chaperone surA;              | 11 |                      | EYSQDPGSANQGDDLGWATPDIF<br>DPAFR              | 326 | 28 | 6  | 28.12  | b3b11y4y7y11y13                                       | 3011.39 | 93.432  | 3669  | 2 | 1506.20 | 16.62  |
| Q7CR87 SURA_SALTY Chaperone surA;              | 12 |                      | DALTK                                         | 354 | 5  | 1  | 13.22  | b4                                                    | 547.30  | 43.538  | 3560  | 1 | 547.30  | -11.71 |
| Q7CR87 SURA_SALTY Chaperone surA;              | 13 |                      | LIMDQIILQMGGK                                 | 73  | 13 | 7  | 74.76  | y4y5y6y7y11°y11y12                                    | 1530.81 | 87.831  | 3180  | 3 | 510.94  | -20.81 |
| Q7CR87 SURA_SALTY Chaperone surA;              | 14 |                      | GQISAPVHSSFGWHLIELLDTR                        | 362 | 22 | 12 | 66.11  | b6°b6b8°b8b9b10°b10b12y3y6y12y13                      | 2463.28 | 94.437  | 1993  | 3 | 821.76  | -0.59  |
| Q7CR87 SURA_SALTY Chaperone surA;              | 15 |                      | LAITYSADQQALKGGQMGWGR                         | 214 | 21 | 10 | 112.41 | y4y5y7y8y9y10y11y12y16y18                             | 2251.12 | 65.034  | 30042 | 3 | 751.05  | -2.71  |
| Q7CR87 SURA_SALTY Chaperone surA;              | 16 |                      | KFSEEAATWMQEQR                                | 404 | 14 | 6  | 39.02  | b6b7b10y5°y5y9                                        | 1740.81 | 56.566  | 9490  | 2 | 870.91  | 7.92   |
| Q7CR87 SURA_SALTY Chaperone surA;              | 17 |                      | SRLAYDGLNYSTYR                                | 115 | 14 | 4  | 19.28  | b6°b6b8y8                                             | 1678.80 | 66.678  | 6835  | 3 | 560.27  | -13.52 |
| Q7CR87 SURA_SALTY Chaperone surA;              | 18 |                      | GQSQSISVTEVHARHILLKPSIMN<br>DQQR              | 274 | 30 | 3  | 11.38  | b3y8y14                                               | 3340.70 | 97.197  | 6391  | 4 | 835.93  | -14.76 |
| Q7CR87 SURA_SALTY Chaperone surA;              | 19 | Oxidation+M(19)      | VAAVVNNGVVLESDDGLMQSV<br>K                    | 27  | 23 | 4  | 35.54  | b3b4y7y8                                              | 2359.22 | 114.747 | 15259 | 3 | 787.08  | 0.62   |
| Q7CR87 SURA_SALTY Chaperone surA;              | 20 |                      | GQSQSISVTEVHAR                                | 274 | 14 | 0  | 3.64   |                                                       | 1481.73 | 36.914  | 1636  | 3 | 494.58  | -2.80  |
| P66038 RISB_SALTY 6                            | 1  |                      | IGQVKDDNITVVWVPGAYELPLA<br>TEALAK             | 40  | 29 | 18 | 114.31 | b3b8b9b10°b10b11°b11°b11b12b13b14°b14y4y9y12y15y16y29 | 3110.69 | 98.082  | 93377 | 3 | 1037.57 | 4.32   |
| P66038 RISB_SALTY 6                            | 2  |                      | FNQFINDSLLDGAVDALTR                           | 21  | 19 | 12 | 98.7   | b4b10b13°y4y5y6y8y9y10y14y15y19                       | 2109.08 | 101.076 | 68524 | 2 | 1055.05 | 10.65  |
| P66038 RISB_SALTY 6                            | 3  |                      | GAEAALTALEMINVLK                              | 136 | 16 | 4  | 17.15  | b6b13y1y4                                             | 1643.90 | 102.746 | 26226 | 2 | 822.46  | -0.37  |
| P66038 RISB_SALTY 6                            | 4  |                      | VAITIAR                                       | 14  | 7  | 3  | 40.46  | y4y5y6                                                | 743.46  | 44.224  | 12653 | 2 | 372.24  | -18.06 |
| P66038 RISB_SALTY 6                            | 5  |                      | ANVAAPDAR                                     | 5   | 9  | 3  | 30.48  | b3y6y7                                                | 884.45  | 22.673  | 11370 | 2 | 442.73  | -7.52  |
| P65882 PURA_SALTY Adenylosuccinate synthetase; | 1  | Carbamidomethyl+C(7) | LLLSEACPLILDYHVALDNAR                         | 97  | 21 | 6  | 30.01  | b2y3y5°y5y8y9                                         | 2396.25 | 91.455  | 28086 | 3 | 799.42  | -7.64  |
| P65882 PURA_SALTY Adenylosuccinate synthetase; | 2  |                      | EVTTTPLAADDWK                                 | 354 | 13 | 5  | 29.66  | b3b9y8y11y13                                          | 1446.72 | 76.070  | 15355 | 2 | 723.86  | 3.04   |
| P65882 PURA_SALTY Adenylosuccinate synthetase; | 3  |                      | GVEPIYETMPGWSESTFGVK                          | 367 | 20 | 4  | 22.61  | b8b11b13y13                                           | 2214.08 | 99.765  | 15303 | 2 | 1107.54 | 14.89  |
| P65882 PURA_SALTY Adenylosuccinate synthetase; | 4  |                      | VLDDTMAVADILTSMVVDVSDLL<br>DQAR               | 186 | 27 | 17 | 124.12 | b2b3b4b5b6b7b9y3*y3y4y5*y5y7y8y10y11*y11              | 2905.45 | 138.295 | 10714 | 3 | 969.16  | 0.50   |
| P65882 PURA_SALTY Adenylosuccinate synthetase; | 5  |                      | MGNNVVVLGTQWGDEGK                             | 0   | 17 | 4  | 23.3   | b14°b14y4y5                                           | 1803.89 | 87.621  | 2164  | 2 | 902.45  | 10.90  |
| P65882 PURA_SALTY Adenylosuccinate synthetase; | 6  |                      | IEELTGVPIDIISTGPDR                            | 402 | 18 | 3  | 15.58  | b7y5y13                                               | 1924.99 | 87.552  | 34351 | 3 | 642.33  | -18.01 |

|                                                |    |                       |                                                        |     |    |   |       |                      |         |         |       |   |         |        |
|------------------------------------------------|----|-----------------------|--------------------------------------------------------|-----|----|---|-------|----------------------|---------|---------|-------|---|---------|--------|
| P65882 PURA_SALTY Adenylosuccinate synthetase; | 7  | Carbamidomethyl+C(2)  | LCVAYR                                                 | 343 | 6  | 1 | 13.62 | b5                   | 781.40  | 30.816  | 19666 | 1 | 781.40  | 1.48   |
| P65882 PURA_SALTY Adenylosuccinate synthetase; | 8  |                       | GNNVVVLGTQWGDEGK                                       | 1   | 16 | 3 | 17.15 | b15y5y14             | 1672.83 | 81.872  | 18552 | 3 | 558.28  | -1.31  |
| P65882 PURA_SALTY Adenylosuccinate synthetase; | 9  |                       | TGWLDTVAVR                                             | 307 | 10 | 4 | 28.66 | b3°b3y5y6            | 1117.59 | 68.919  | 4986  | 2 | 559.30  | -5.02  |
| P65882 PURA_SALTY Adenylosuccinate synthetase; | 10 |                       | AYSTR                                                  | 268 | 5  | 1 | 13.22 | b4                   | 597.29  | 49.346  | 2866  | 1 | 597.29  | -12.47 |
| P65882 PURA_SALTY Adenylosuccinate synthetase; | 11 |                       | YVDYVLGILK                                             | 258 | 10 | 3 | 33.89 | b3b6b7               | 1182.67 | 44.956  | 2193  | 2 | 591.84  | -5.26  |
| P65882 PURA_SALTY Adenylosuccinate synthetase; | 12 |                       | VGDLFDK                                                | 148 | 7  | 4 | 40.46 | b4°b4y3y6            | 793.39  | 70.551  | 1913  | 1 | 793.39  | -20.00 |
| P65882 PURA_SALTY Adenylosuccinate synthetase; | 13 |                       | AEAVDYQK                                               | 178 | 8  | 4 | 36.09 | b4°b4b7y3            | 923.44  | 88.680  | 1583  | 1 | 923.44  | -2.71  |
| P65882 PURA_SALTY Adenylosuccinate synthetase; | 14 |                       | GIGPAYEDK                                              | 132 | 9  | 3 | 30.48 | b5b6y8               | 949.46  | 83.143  | 1538  | 1 | 949.46  | -0.64  |
| P65882 PURA_SALTY Adenylosuccinate synthetase; | 15 |                       | GNNVVVLGTQWGDEGKGK                                     | 1   | 18 | 4 | 15.58 | b13y5y7°y7           | 1857.92 | 40.213  | 78305 | 2 | 929.47  | -11.37 |
| P65882 PURA_SALTY Adenylosuccinate synthetase; | 16 |                       | AIGTTGRGIGPAYEDK                                       | 125 | 16 | 3 | 17.15 | b5y5y7               | 1605.81 | 82.240  | 17604 | 2 | 803.41  | -7.45  |
| P65882 PURA_SALTY Adenylosuccinate synthetase; | 17 |                       | VLDDTMAVADILTSMVVDVSDLLDQARQR                          | 186 | 29 | 3 | 22.71 | b8b9b11              | 3189.62 | 109.058 | 6288  | 3 | 1063.88 | 0.69   |
| P65882 PURA_SALTY Adenylosuccinate synthetase; | 18 |                       | EVMHEYHNFQLVNYKAEAVDYQK                                | 163 | 23 | 7 | 29.46 | b20y4°y4*y4y7y10y19  | 2881.39 | 93.547  | 3644  | 3 | 961.13  | 12.12  |
| P65882 PURA_SALTY Adenylosuccinate synthetase; | 19 |                       | LKEVMEYHNFQLVNYK                                       | 161 | 17 | 4 | 16.31 | b9y5y10*y10          | 2218.09 | 112.832 | 3398  | 2 | 1109.55 | -3.19  |
| P65882 PURA_SALTY Adenylosuccinate synthetase; | 20 | Oxidation+M()         | ENVTSIIGNGVVLSPSALMKEMKELEDRL                          | 62  | 28 | 7 | 25.52 | b4°b4b8*b8y6y7y9     | 3075.54 | 132.607 | 4998  | 3 | 1025.85 | -8.34  |
| P65882 PURA_SALTY Adenylosuccinate synthetase; | 21 | Oxidation+M(15)       | VLDDTMAVADILTSMVVDVSDLLDQAR                            | 186 | 27 | 4 | 11.9  | b11°b11y10y12        | 2921.45 | 122.318 | 3086  | 3 | 974.49  | 1.75   |
| Q7CPZ4 GRPE_SALTY Protein grpE;                | 1  |                       | FVNELLPVIDSLDR                                         | 90  | 14 | 7 | 60.39 | b4y4y5°y5y6y8y9      | 1629.89 | 96.676  | 28510 | 2 | 815.45  | 2.02   |
| Q7CPZ4 GRPE_SALTY Protein grpE;                | 2  |                       | IANLEVQLAEAQTR                                         | 43  | 14 | 4 | 44.75 | y5y7y10y13           | 1555.85 | 63.262  | 6153  | 2 | 778.43  | 5.18   |
| Q7CPZ4 GRPE_SALTY Protein grpE;                | 3  |                       | FGVEVIAETNPVLDPNVHQAIAI<br>VESEVPAGNVLGIMQKGYTLNG<br>R | 136 | 47 | 7 | 22.77 | b7b8b10°b10b15y15y24 | 5006.47 | 69.015  | 4215  | 4 | 1252.37 | -13.26 |
| Q7CR64 YAEH_SALTY UPF0325 protein yaeH;        | 1  | Carbamidomethyl+C(10) | YVIDELDQICQRDR                                         | 77  | 14 | 6 | 27.57 | b1b5b9y3y11y14       | 1822.89 | 53.657  | 50965 | 3 | 608.30  | 5.56   |
| Q7CR64 YAEH_SALTY UPF0325 protein yaeH;        | 2  | Carbamidomethyl+C(10) | YVIDELDQICQR                                           | 77  | 12 | 8 | 49.67 | b2b8y1y3y8y9y10y12   | 1551.75 | 68.054  | 38427 | 2 | 776.38  | 4.48   |
| Q7CR64 YAEH_SALTY UPF0325 protein yaeH;        | 3  |                       | TVVADGIGQGYKEVQEISPNLR                                 | 55  | 22 | 6 | 18.16 | b2b5b13y4y8y22       | 2373.23 | 71.699  | 34127 | 3 | 791.75  | -4.84  |
| Q7CR64 YAEH_SALTY UPF0325 protein yaeH;        | 4  |                       | TVVADGIGQGYK                                           | 55  | 12 | 4 | 22.27 | b8b11y4y12           | 1207.62 | 48.233  | 1803  | 2 | 604.31  | -9.10  |
| Q7CR64 YAEH_SALTY UPF0325 protein yaeH;        | 5  |                       | SLGITNPPEIDR                                           | 6   | 12 | 4 | 44.91 | y6y7y9y11            | 1343.70 | 81.528  | 14408 | 2 | 672.36  | 17.99  |
| Q7CR64 YAEH_SALTY UPF0325 protein yaeH;        | 6  |                       | ILDDLRL                                                | 99  | 6  | 1 | 13.62 | b5                   | 744.42  | 51.776  | 12394 | 1 | 744.42  | -10.41 |
| Q7CR64 YAEH_SALTY UPF0325 protein yaeH;        | 7  |                       | IYFQK                                                  | 31  | 5  | 1 | 13.22 | y3                   | 698.38  | 38.383  | 4053  | 2 | 349.69  | -10.49 |
| Q7CR64 YAEH_SALTY UPF0325 protein yaeH;        | 8  |                       | HLESVVANK                                              | 105 | 9  | 3 | 30.48 | b4y3y5               | 996.53  | 37.545  | 2627  | 2 | 498.77  | -17.27 |
| Q7CR64 YAEH_SALTY UPF0325 protein yaeH;        | 9  |                       | TVVADGIGQGYKEVQEISPNLR                                 | 55  | 22 | 3 | 13.43 | b11y3y5              | 2373.25 | 91.487  | 71401 | 3 | 791.75  | 2.47   |
| Q7CR64 YAEH_SALTY UPF0325 protein yaeH;        | 10 |                       | SLGITNPPEIDRYSRLR                                      | 6   | 16 | 3 | 17.15 | b11y9y12             | 1862.98 | 79.042  | 6706  | 3 | 621.67  | 10.81  |
| Q7CPH8 SECB_SALTY Protein-export protein secB; | 1  |                       | GTFPQLNLAPVNFDAFMNYLQQ<br>QAGEGTTEHQDA                 | 120 | 35 | 7 | 51.04 | b6b7b8b9y4y26y35     | 3893.84 | 115.911 | 16186 | 3 | 1298.62 | 8.78   |

|                                                |    |                       |                                     |     |    |    |        |                                            |         |         |        |   |         |        |
|------------------------------------------------|----|-----------------------|-------------------------------------|-----|----|----|--------|--------------------------------------------|---------|---------|--------|---|---------|--------|
| Q7CPH8 SECB_SALTY Protein-export protein secB; | 2  |                       | LDLDTASSQLADDVYEVVLR                | 41  | 20 | 15 | 55.41  | b2b4°b4b6°b6b8°b8b9y3y6y9y10°y10y20*y20    | 2222.14 | 109.125 | 12574  | 2 | 1111.57 | 10.44  |
| Q7CPH8 SECB_SALTY Protein-export protein secB; | 3  |                       | DVSFEAPNAPHVFQK                     | 19  | 15 | 5  | 29.43  | b4b5b13y2y13                               | 1685.82 | 73.820  | 2286   | 2 | 843.41  | -5.21  |
| Q7CPH8 SECB_SALTY Protein-export protein secB; | 4  |                       | SEQNNTMAFQIQR                       | 1   | 14 | 3  | 19.28  | b9b13y9                                    | 1695.81 | 83.967  | 3543   | 2 | 848.41  | 21.52  |
| Q7CPH8 SECB_SALTY Protein-export protein secB; | 5  |                       | IYTKDVSFEAPNAPHVFQK                 | 15  | 19 | 6  | 46.19  | b8b10b11b13b14*b14                         | 2191.11 | 69.010  | 9332   | 3 | 731.04  | -5.68  |
| P64052 EFTS_SALTY Elongation factor Ts;        | 1  |                       | VASLEGDVLGSYQHGAR                   | 134 | 17 | 16 | 131.67 | b1b3y3y4y5y6y7y8°y8y10y11°y11y12*y12y13y17 | 1758.85 | 58.924  | 167126 | 3 | 586.96  | -13.46 |
| P64052 EFTS_SALTY Elongation factor Ts;        | 2  |                       | ITDVEVLK                            | 104 | 8  | 6  | 40.86  | b2y2y3y6y7y8                               | 916.53  | 48.616  | 86659  | 2 | 458.77  | -10.12 |
| P64052 EFTS_SALTY Elongation factor Ts;        | 3  |                       | AEITASLVK                           | 1   | 9  | 5  | 54.49  | y4y5y6y7y9                                 | 931.54  | 48.688  | 81602  | 2 | 466.27  | -7.27  |
| P64052 EFTS_SALTY Elongation factor Ts;        | 4  |                       | FTGEVSLTGQPFVMEPSK                  | 222 | 18 | 6  | 24.81  | b11y1y3y5y13y18                            | 1953.98 | 74.548  | 69258  | 2 | 977.49  | 8.37   |
| P64052 EFTS_SALTY Elongation factor Ts;        | 5  |                       | IGENINIR                            | 125 | 8  | 6  | 40.86  | b2y2y5y6y7y8                               | 928.51  | 44.512  | 68981  | 2 | 464.76  | -12.75 |
| P64052 EFTS_SALTY Elongation factor Ts;        | 6  |                       | ALTEANGDIELAIENMRK                  | 25  | 18 | 8  | 50.04  | b7b9b12y4*y4y5y14y16                       | 1988.00 | 74.110  | 47604  | 3 | 663.34  | -6.63  |
| P64052 EFTS_SALTY Elongation factor Ts;        | 7  | Carbamidomethyl+C(8)  | TGAGMMDCKK                          | 15  | 10 | 3  | 36.9   | y4y5y6                                     | 1098.47 | 20.977  | 23221  | 2 | 549.74  | -1.89  |
| P64052 EFTS_SALTY Elongation factor Ts;        | 8  |                       | SVGQLLK                             | 240 | 7  | 6  | 40.46  | b1b6y2y3y5y7                               | 744.45  | 44.959  | 10330  | 2 | 372.73  | -14.92 |
| P64052 EFTS_SALTY Elongation factor Ts;        | 9  |                       | EYQVQLDIAMQSGKPK                    | 193 | 16 | 7  | 46.6   | b4b5b7y4y9y10*y10                          | 1834.94 | 70.416  | 7440   | 3 | 612.32  | 2.20   |
| P64052 EFTS_SALTY Elongation factor Ts;        | 10 |                       | ALTEANGDIELAIENMR                   | 25  | 17 | 4  | 16.31  | b11y3y6y17                                 | 1859.92 | 81.853  | 5580   | 2 | 930.46  | 2.30   |
| P64052 EFTS_SALTY Elongation factor Ts;        | 11 |                       | FEVGEGIEK                           | 258 | 9  | 3  | 46.04  | b3b5b7                                     | 1007.48 | 34.972  | 75254  | 2 | 504.25  | -20.96 |
| P64052 EFTS_SALTY Elongation factor Ts;        | 12 |                       | IGVLVAAK                            | 151 | 8  | 6  | 77.5   | b3b4y3y5y6y7                               | 770.50  | 47.173  | 48521  | 2 | 385.75  | -16.00 |
| P64052 EFTS_SALTY Elongation factor Ts;        | 13 |                       | AGNVAADGVIK                         | 52  | 11 | 5  | 36.72  | b8y4y6y7°y7                                | 1014.54 | 36.787  | 25258  | 2 | 507.77  | -15.04 |
| P64052 EFTS_SALTY Elongation factor Ts;        | 14 |                       | MVEGR                               | 214 | 5  | 1  | 13.22  | y4                                         | 591.29  | 38.372  | 5894   | 1 | 591.29  | 2.27   |
| P64052 EFTS_SALTY Elongation factor Ts;        | 15 |                       | DAGFQAFADK                          | 85  | 10 | 4  | 28.66  | b7°b7b8y5                                  | 1069.47 | 27.975  | 5583   | 2 | 535.24  | -19.29 |
| P64052 EFTS_SALTY Elongation factor Ts;        | 16 | Carbamidomethyl+C(13) | IDGNVAFILEVNCQTDFVAK                | 65  | 20 | 5  | 19.76  | b3°b3b8y6y10                               | 2253.08 | 74.808  | 3467   | 4 | 564.02  | -19.94 |
| P64052 EFTS_SALTY Elongation factor Ts;        | 17 |                       | DAGFQAFADKVLDAAVAGK                 | 85  | 19 | 4  | 31.59  | y3y6y7y17                                  | 1893.95 | 97.732  | 113928 | 3 | 631.99  | -9.22  |
| P64052 EFTS_SALTY Elongation factor Ts;        | 18 |                       | KAGNVAADGVIK                        | 51  | 12 | 7  | 48.12  | b10b11y8y10y11°y11*y11                     | 1142.65 | 32.000  | 55814  | 2 | 571.83  | -6.30  |
| P64052 EFTS_SALTY Elongation factor Ts;        | 19 |                       | GADEELVKQLAMHVAASKPEFVK PEDVSADVVEK | 159 | 34 | 4  | 10.98  | b7°b7b13y12                                | 3665.88 | 78.308  | 4358   | 4 | 917.22  | 1.00   |
| P64052 EFTS_SALTY Elongation factor Ts;        | 20 |                       | KFTGEVSLTGQPFVMEPSK                 | 221 | 19 | 4  | 22.71  | b13°b13y13y14                              | 2082.07 | 78.321  | 3428   | 2 | 1041.54 | 4.57   |
| P64052 EFTS_SALTY Elongation factor Ts;        | 21 |                       | FEVGEGIEKVETDFAAEVAAMSK             | 258 | 23 | 6  | 33.9   | b3b10y3y5y12y13                            | 2457.16 | 59.483  | 2053   | 3 | 819.72  | -12.32 |
| P64052 EFTS_SALTY Elongation factor Ts;        | 22 | Oxidation+M(4)        | QLAMHVAASKPEFVKPEDVSADV VEK         | 167 | 26 | 7  | 21.93  | b7b10b12°b12y11°y11y20                     | 2840.43 | 61.526  | 11720  | 3 | 947.48  | -5.93  |
| P64052 EFTS_SALTY Elongation factor Ts;        | 23 | Oxidation+M(14)       | FTGEVSLTGQPFVMEPSK                  | 222 | 18 | 3  | 15.58  | b12b15y10                                  | 1969.96 | 79.416  | 9525   | 2 | 985.48  | 0.00   |
| P64052 EFTS_SALTY Elongation factor Ts;        | 24 | Oxidation+M(16)       | ALTEANGDIELAIENMRK                  | 25  | 18 | 8  | 24.81  | b8b10°b10°b10b14°b14y11*y11                | 2003.99 | 69.032  | 4942   | 2 | 1002.50 | -8.71  |

|                                                                            |    |                                          |                                      |     |    |    |       |                                                                     |         |         |        |   |         |        |
|----------------------------------------------------------------------------|----|------------------------------------------|--------------------------------------|-----|----|----|-------|---------------------------------------------------------------------|---------|---------|--------|---|---------|--------|
| [P64052]EFTS_SALTY Elongation factor Ts;                                   | 25 |                                          | ITASLVK                              | 3   | 7  | 0  | 1.62  |                                                                     | 731.46  | 48.695  | 11323  | 1 | 731.46  | -12.43 |
| [P65889]PUR7_SALTY Phohoribosylaminoimidazole-succinocarboxamide synthase; | 1  |                                          | LAEAGIPTQMER                         | 60  | 12 | 12 | 71.55 | b2b3°b3b4b6y1y6y8y9y10*y10y12                                       | 1315.67 | 49.862  | 39148  | 2 | 658.34  | -1.11  |
| [P65889]PUR7_SALTY Phohoribosylaminoimidazole-succinocarboxamide synthase; | 2  |                                          | QSLGGLIEAYEAVHR                      | 215 | 16 | 4  | 17.15 | b5b11°b11y7                                                         | 1713.87 | 84.811  | 38020  | 3 | 571.96  | -12.61 |
| [P65889]PUR7_SALTY Phohoribosylaminoimidazole-succinocarboxamide synthase; | 3  |                                          | TVYSTENPDLLVLEFR                     | 13  | 16 | 6  | 23.69 | b2°b2b4b5y3y16                                                      | 1895.97 | 88.283  | 18473  | 2 | 948.49  | -0.39  |
| [P65889]PUR7_SALTY Phohoribosylaminoimidazole-succinocarboxamide synthase; | 4  | Carbamidomethyl+C(8)                     | LEMVPVECVVR                          | 83  | 11 | 3  | 36.06 | b3b5b9                                                              | 1330.67 | 94.941  | 3441   | 2 | 665.84  | -13.03 |
| [P65889]PUR7_SALTY Phohoribosylaminoimidazole-succinocarboxamide synthase; | 5  | Carbamidomethyl+C(9)                     | KLEMVPVECVVR                         | 82  | 12 | 6  | 63.56 | b5b6y4y5y7y11                                                       | 1458.79 | 62.520  | 27255  | 2 | 729.90  | 3.35   |
| [P65889]PUR7_SALTY Phohoribosylaminoimidazole-succinocarboxamide synthase; | 6  |                                          | TVYSTENPDLLVLEFRNDTSAGD GAR          | 13  | 26 | 3  | 22.81 | y3y4y8                                                              | 2840.38 | 80.412  | 12726  | 3 | 947.47  | 3.78   |
| [P65889]PUR7_SALTY Phohoribosylaminoimidazole-succinocarboxamide synthase; | 7  |                                          | GEVVLGDEFSPDGSRLWDK                  | 184 | 19 | 5  | 25.86 | b3b4°b4b6y10                                                        | 2106.00 | 104.349 | 3104   | 2 | 1053.51 | -4.64  |
| [P0A7V6]RS3_SALTY 30S ribosomal protein S3;                                | 1  |                                          | LVADSITSQLER                         | 114 | 12 | 12 | 87.78 | b2b3b4b10y2y5°y5y6y8y9y10y12                                        | 1331.71 | 60.443  | 27472  | 2 | 666.36  | -2.93  |
| [P0A7V6]RS3_SALTY 30S ribosomal protein S3;                                | 2  |                                          | ADIDYNTSEAHTTYGVIGVK                 | 179 | 20 | 3  | 22.5  | b13y17y18                                                           | 2154.03 | 56.289  | 23121  | 3 | 718.68  | -4.19  |
| [P0A7V6]RS3_SALTY 30S ribosomal protein S3;                                | 3  | Phosphoryl STY(7)                        | LVADSITSQLERR                        | 114 | 13 | 4  | 25.41 | b4°b4b5y8                                                           | 1567.76 | 59.490  | 14868  | 2 | 784.39  | -6.62  |
| [P0A7V6]RS3_SALTY 30S ribosomal protein S3;                                | 4  | Phosphoryl STY(10)                       | LGIVKPWNSTWFANTK                     | 11  | 16 | 3  | 23.69 | b14y5y6                                                             | 1941.93 | 35.641  | 2075   | 3 | 647.98  | -9.99  |
| [Q8ZP65]TPX_SALTY Probable thiol peroxidase;                               | 1  |                                          | SQTVHFQGNPVTVANVIPQAGSK              | 1   | 23 | 24 | 98.65 | b2°b2*b2b4°b4b5b7°b7b9°b9b10°b10*b10b11b12°b12y4y6°y6y7y9y12*y12y23 | 2379.23 | 64.386  | 108136 | 3 | 793.75  | -3.90  |
| [Q8ZP65]TPX_SALTY Probable thiol peroxidase;                               | 2  | Carbamidomethyl+C(13)                    | VLNIFPSIDTGVCASVR                    | 48  | 18 | 6  | 50.14 | b3b4b5y13y14y18                                                     | 1919.01 | 85.014  | 50355  | 2 | 960.01  | 4.26   |
| [Q8ZP65]TPX_SALTY Probable thiol peroxidase;                               | 3  |                                          | DLSDVSLSQYAGK                        | 33  | 13 | 5  | 20.63 | b2b10y6y11y13                                                       | 1382.68 | 59.171  | 35054  | 2 | 691.85  | 2.21   |
| [Q8ZP65]TPX_SALTY Probable thiol peroxidase;                               | 4  | Carbamidomethyl+C(2)                     | FCGAEGLSNVITLSTLR                    | 93  | 17 | 8  | 54.61 | b2b3b4b7y4y5y6y17                                                   | 1837.96 | 85.877  | 34158  | 2 | 919.48  | 4.65   |
| [Q8ZP65]TPX_SALTY Probable thiol peroxidase;                               | 5  |                                          | DLSDVSLSQYAGKR                       | 33  | 14 | 6  | 19.28 | b2°b2b7b12y10y14                                                    | 1538.78 | 54.773  | 4285   | 2 | 769.89  | -0.95  |
| [Q8ZP65]TPX_SALTY Probable thiol peroxidase;                               | 6  |                                          | AQAFTLVAK                            | 24  | 9  | 5  | 57.5  | y3y4y6°y6y7                                                         | 948.54  | 53.204  | 63728  | 2 | 474.77  | -17.18 |
| [Q8ZP65]TPX_SALTY Probable thiol peroxidase;                               | 7  |                                          | GLAAR                                | 128 | 5  | 1  | 13.22 | b3                                                                  | 487.29  | 54.229  | 17951  | 1 | 487.29  | -13.97 |
| [Q8ZP65]TPX_SALTY Probable thiol peroxidase;                               | 8  |                                          | NYGVEIVDGPLK                         | 116 | 12 | 3  | 22.27 | b3y4y10                                                             | 1303.68 | 64.652  | 16063  | 2 | 652.35  | -4.87  |
| [Q8ZP65]TPX_SALTY Probable thiol peroxidase;                               | 9  |                                          | MSQTVHFQGNPVTVANVIPQAGS K            | 0   | 24 | 3  | 19.01 | b9b12b17                                                            | 2510.23 | 68.278  | 5531   | 3 | 837.41  | -21.10 |
| [Q8ZP65]TPX_SALTY Probable thiol peroxidase;                               | 10 |                                          | AVIVLDENDNVIFSQLVDEITHEPD YDAALNVLKA | 133 | 35 | 21 | 162.1 | b3b4b5b8b11°b11b15b16b32y3y5y6y7y8y12y18y24y28y29y30y31             | 3882.98 | 119.952 | 80826  | 3 | 1295.00 | 4.97   |
| [Q8ZP65]TPX_SALTY Probable thiol peroxidase;                               | 11 | Carbamidomethyl+C(13) ;Phosphoryl STY(7) | VLNIFPSIDTGVCASVRK                   | 48  | 19 | 3  | 14.93 | b6b10y14                                                            | 2127.04 | 96.742  | 10955  | 2 | 1064.02 | -7.23  |

|                                                                           |    |  |                           |     |    |    |       |                              |         |         |       |   |         |        |
|---------------------------------------------------------------------------|----|--|---------------------------|-----|----|----|-------|------------------------------|---------|---------|-------|---|---------|--------|
| Q7CPK0 UGPB_SALTY sn-glycerol-3-phohate-binding periplasmic protein ugpB; | 1  |  | TGYLPITTAAYELTR           | 343 | 15 | 12 | 99.2  | b3b4b5°b5y4y5y6y7y9°y9y11y15 | 1669.88 | 84.722  | 98863 | 2 | 835.45  | 2.85   |
| Q7CPK0 UGPB_SALTY sn-glycerol-3-phohate-binding periplasmic protein ugpB; | 2  |  | TIVDEELESVWTGKK           | 397 | 15 | 5  | 25.79 | b4b6y8y13y15                 | 1733.88 | 75.479  | 39388 | 3 | 578.63  | -11.19 |
| Q7CPK0 UGPB_SALTY sn-glycerol-3-phohate-binding periplasmic protein ugpB; | 3  |  | TGNAPAILQVYEVGTATMMASK    | 77  | 22 | 4  | 26.91 | b3b4y6y15                    | 2253.16 | 93.817  | 24752 | 2 | 1127.08 | 14.41  |
| Q7CPK0 UGPB_SALTY sn-glycerol-3-phohate-binding periplasmic protein ugpB; | 4  |  | FNYGVGMMPYDADIK           | 282 | 15 | 7  | 36.7  | b2y2y3y7y8y10y15             | 1720.79 | 74.431  | 15469 | 2 | 860.90  | 10.78  |
| Q7CPK0 UGPB_SALTY sn-glycerol-3-phohate-binding periplasmic protein ugpB; | 5  |  | TIVDEELESVWTGK            | 397 | 14 | 5  | 31.53 | b6y7y11y13°y13               | 1605.81 | 94.495  | 4817  | 2 | 803.41  | 6.46   |
| Q7CPK0 UGPB_SALTY sn-glycerol-3-phohate-binding periplasmic protein ugpB; | 6  |  | TGYLPITTAAYELTREQGYDDK    | 343 | 22 | 6  | 20.86 | b14y2y5y8°y8y10              | 2553.24 | 78.228  | 3671  | 3 | 851.75  | -4.59  |
| Q7CPK0 UGPB_SALTY sn-glycerol-3-phohate-binding periplasmic protein ugpB; | 7  |  | FLDFLAKPENAAEWHQK         | 326 | 17 | 4  | 22.92 | b3b8y4y7                     | 2043.99 | 74.067  | 73732 | 4 | 511.75  | -21.02 |
| Q7CPK0 UGPB_SALTY sn-glycerol-3-phohate-binding periplasmic protein ugpB; | 8  |  | QMLNKPPLPFTK              | 374 | 12 | 4  | 26.25 | b7y3y4°y4                    | 1413.77 | 61.554  | 63073 | 3 | 471.93  | -13.30 |
| Q7CPK0 UGPB_SALTY sn-glycerol-3-phohate-binding periplasmic protein ugpB; | 9  |  | LGNMPQIR                  | 389 | 8  | 3  | 33.08 | b5y6y7                       | 928.51  | 27.829  | 45046 | 2 | 464.76  | 3.22   |
| Q7CPK0 UGPB_SALTY sn-glycerol-3-phohate-binding periplasmic protein ugpB; | 10 |  | NNGFDGTDAVLEFNKPEQVK      | 212 | 20 | 5  | 33.45 | b11y6y8y11y18                | 2222.08 | 65.225  | 23415 | 3 | 741.37  | 4.18   |
| Q7CPK0 UGPB_SALTY sn-glycerol-3-phohate-binding periplasmic protein ugpB; | 11 |  | GNYEQNLASAGIAAFR          | 62  | 15 | 3  | 18.13 | b13y4y8                      | 1610.79 | 72.949  | 18540 | 2 | 805.90  | 0.53   |
| Q7CPK0 UGPB_SALTY sn-glycerol-3-phohate-binding periplasmic protein ugpB; | 12 |  | TWQELADYTAK               | 167 | 11 | 4  | 24.3  | b5°b5y4y9                    | 1325.63 | 28.785  | 8916  | 2 | 663.32  | -7.83  |
| Q7CPK0 UGPB_SALTY sn-glycerol-3-phohate-binding periplasmic protein ugpB; | 13 |  | EVDSLAQR                  | 39  | 8  | 5  | 36.09 | b5°b5b7y7°y7                 | 917.47  | 41.655  | 7336  | 2 | 459.24  | 4.12   |
| Q7CPK0 UGPB_SALTY sn-glycerol-3-phohate-binding periplasmic protein ugpB; | 14 |  | SGHLLSQPFNSSTPVLYYNK      | 132 | 20 | 6  | 21.16 | b3b8°b8*b8b11°b11            | 2252.16 | 68.317  | 3868  | 2 | 1126.58 | 9.97   |
| Q7CPK0 UGPB_SALTY sn-glycerol-3-phohate-binding periplasmic protein ugpB; | 15 |  | GAPQNAIIGGASLWVMQGK       | 297 | 19 | 3  | 14.93 | b3b11y9                      | 1897.97 | 114.295 | 2110  | 2 | 949.49  | -13.51 |
| Q7CPK0 UGPB_SALTY sn-glycerol-3-phohate-binding periplasmic protein ugpB; | 16 |  | DAGINFDESQFVPTVAGYYTDAK   | 109 | 23 | 7  | 24.55 | b8b13*b13y8°y8y10y14         | 2508.15 | 124.320 | 1531  | 3 | 836.72  | -3.02  |
| Q7CPK0 UGPB_SALTY sn-glycerol-3-phohate-binding periplasmic protein ugpB; | 17 |  | AGLDPEQPPKTWQELADYTAK     | 157 | 21 | 6  | 37.02 | b4b15y3y6y14y17              | 2358.15 | 72.555  | 92214 | 3 | 786.72  | -4.04  |
| Q7CPK0 UGPB_SALTY sn-glycerol-3-phohate-binding periplasmic protein ugpB; | 18 |  | NPGADIATRQMLNKPPLPFTK     | 365 | 21 | 4  | 20.51 | b4*b4b8b10                   | 2309.22 | 67.355  | 3571  | 3 | 770.41  | -8.99  |
| Q7CPK0 UGPB_SALTY sn-glycerol-3-phohate-binding periplasmic protein ugpB; | 19 |  | ETYTGVAKFLDFLAKPENAAEWHQK | 318 | 25 | 5  | 18.83 | b6y3y8y10°y10                | 2893.45 | 115.998 | 2341  | 3 | 965.15  | -1.94  |

|                                                                           |    |                      |                                                    |     |    |    |       |                                                        |         |         |       |   |         |        |
|---------------------------------------------------------------------------|----|----------------------|----------------------------------------------------|-----|----|----|-------|--------------------------------------------------------|---------|---------|-------|---|---------|--------|
| Q7CPK0 UGPB_SALTY sn-glycerol-3-phohate-binding periplasmic protein ugpB; | 20 | Phosphoryl STY(12)   | GAPQNAIIGGASLWVMQ GKDK                             | 297 | 21 | 3  | 13.87 | b3b13y8                                                | 2221.09 | 115.178 | 2857  | 3 | 741.04  | 8.68   |
| Q7CPK0 UGPB_SALTY sn-glycerol-3-phohate-binding periplasmic protein ugpB; | 21 | Oxidation+M(19)      | TGNAPAILQVYEVGTATMMASK                             | 77  | 22 | 7  | 18.16 | b11*b11b18y4°y4y13°y13                                 | 2269.14 | 69.037  | 69074 | 3 | 757.05  | 7.96   |
| Q7CPK0 UGPB_SALTY sn-glycerol-3-phohate-binding periplasmic protein ugpB; | 22 | Oxidation+M(8)       | HIALLEEMNK                                         | 232 | 10 | 3  | 26.9  | b7y4y6                                                 | 1213.63 | 28.211  | 4805  | 3 | 405.21  | 2.11   |
| Q7CPK0 UGPB_SALTY sn-glycerol-3-phohate-binding periplasmic protein ugpB; | 23 | Oxidation+M()        | FNYGVGMMPYDADIK                                    | 282 | 15 | 5  | 31.81 | b5*b5b6y3y13                                           | 1736.77 | 71.486  | 4259  | 3 | 579.60  | 2.74   |
| O54297 RS4_SALTY 30S ribosomal protein S4;                                | 1  |                      | VVNIASYQVSPNDVVSIR                                 | 128 | 18 | 14 | 88.94 | b4b8b10b14y1y2y3y4y9y10y11*y11y13y18                   | 1960.06 | 72.026  | 28405 | 2 | 980.53  | 4.61   |
| O54297 RS4_SALTY 30S ribosomal protein S4;                                | 2  |                      | IEQAPGQHGAR                                        | 33  | 11 | 5  | 24.3  | b2b9y2y8y10                                            | 1163.59 | 27.041  | 2011  | 2 | 582.30  | -4.51  |
| O54297 RS4_SALTY 30S ribosomal protein S4;                                | 3  |                      | GNTGENLLALLEGR                                     | 83  | 14 | 5  | 30.73 | b4b5b9y4°y4                                            | 1456.80 | 94.487  | 4613  | 2 | 728.90  | 16.42  |
| O54297 RS4_SALTY 30S ribosomal protein S4;                                | 4  |                      | SDLSADINEHLIVELYSK                                 | 188 | 18 | 7  | 40.21 | b5b8*b8b13y6y10y13                                     | 2046.06 | 79.237  | 2922  | 3 | 682.69  | 9.90   |
| O54297 RS4_SALTY 30S ribosomal protein S4;                                | 5  |                      | AALELAEQR                                          | 156 | 9  | 5  | 45.46 | b3y3y4y7*y7                                            | 1000.53 | 43.331  | 2524  | 1 | 1000.53 | -10.19 |
| O54297 RS4_SALTY 30S ribosomal protein S4;                                | 6  |                      | IEQAPGQH GARKPR                                    | 33  | 14 | 4  | 27.85 | b4b6*b6b11                                             | 1544.85 | 54.059  | 11270 | 3 | 515.62  | 8.22   |
| O54297 RS4_SALTY 30S ribosomal protein S4;                                | 7  | Carbamidomethyl+C(1) | CKIEQAPGQHGAR                                      | 31  | 13 | 4  | 20.63 | b12y5y11*y11                                           | 1451.70 | 56.581  | 9146  | 3 | 484.57  | -12.28 |
| O54297 RS4_SALTY 30S ribosomal protein S4;                                | 8  |                      | KPERSDLSADINEHLIVELYSK                             | 184 | 22 | 3  | 13.43 | b8b12y3                                                | 2556.32 | 111.273 | 8899  | 3 | 852.78  | -2.58  |
| O54297 RS4_SALTY 30S ribosomal protein S4;                                | 9  |                      | KPRLSDYGVQLR                                       | 44  | 12 | 3  | 22.27 | b9y5y7                                                 | 1431.79 | 77.070  | 8780  | 2 | 716.40  | -11.25 |
| O54297 RS4_SALTY 30S ribosomal protein S4;                                | 10 |                      | LSDYGVQLREK                                        | 47  | 11 | 6  | 73.28 | b3b4b6b8*b8b10                                         | 1307.70 | 88.079  | 3458  | 2 | 654.35  | 1.31   |
| Q8ZLD7 UA_SALTY Universal stress protein A;                               | 1  |                      | AVSMARPYNAK                                        | 22  | 11 | 11 | 90.17 | b2b5b6b9y2y3y5°y5y7y9y11                               | 1207.62 | 31.397  | 83867 | 2 | 604.31  | -6.47  |
| Q8ZLD7 UA_SALTY Universal stress protein A;                               | 2  |                      | QLINTVHVDMLIVPLRDEEE                               | 124 | 20 | 9  | 39.19 | b12y1y7y8y9°y9y11°y11y20                               | 2363.22 | 86.355  | 74730 | 3 | 788.41  | -5.27  |
| Q8ZLD7 UA_SALTY Universal stress protein A;                               | 3  |                      | VLVEK                                              | 17  | 5  | 1  | 13.22 | y3                                                     | 587.38  | 41.146  | 6151  | 1 | 587.38  | 11.43  |
| Q8ZLD7 UA_SALTY Universal stress protein A;                               | 4  |                      | ISEETHHALTELSTNAGYPITETLSGSGDLGQVLVDAIK            | 61  | 39 | 3  | 10.86 | b4b6y13                                                | 4067.08 | 88.756  | 1717  | 3 | 1356.36 | 7.62   |
| Q8ZLD7 UA_SALTY Universal stress protein A;                               | 5  |                      | AYKHILIAVDLSPESK                                   | 1   | 16 | 3  | 17.15 | b12b14y15                                              | 1783.98 | 136.757 | 1665  | 1 | 1783.98 | -7.46  |
| Q8ZLD7 UA_SALTY Universal stress protein A;                               | 6  |                      | SMARPYNAK                                          | 24  | 9  | 2  | 18.86 | b4b6                                                   | 1037.51 | 31.326  | 81736 | 2 | 519.26  | -7.65  |
| Q8ZLD7 UA_SALTY Universal stress protein A;                               | 7  |                      | VSMARPYNAK                                         | 23  | 10 | 0  | 2.43  |                                                        | 1136.58 | 31.317  | 8654  | 2 | 568.79  | -4.94  |
| Q8ZQ40 WRBA_SALTY Flavoprotein wrbA;                                      | 1  |                      | LGSVFSSTGTGGGQEQTITSTWTT LAHHGMVIVPIGYAAQELFDVSQVR | 106 | 49 | 18 | 52.38 | b2b7b8°b8b9b12°b12b16b35y1y2y3y4*y4y7y9y13*y13         | 5134.58 | 116.094 | 28928 | 4 | 1284.40 | 3.33   |
| Q8ZQ40 WRBA_SALTY Flavoprotein wrbA;                                      | 2  |                      | FGNMSGQMR                                          | 79  | 9  | 5  | 38.26 | y2y4y5y6y9                                             | 1027.45 | 38.317  | 16831 | 2 | 514.23  | 1.07   |
| Q8ZQ40 WRBA_SALTY Flavoprotein wrbA;                                      | 3  |                      | TQNAPVATPQELADYDAIIFGTPT R                         | 54  | 25 | 19 | 78.9  | b2°b2*b2b4b5*b5b6b7°b7°b7b14°b14*b14y6y13°y13y14y15y25 | 2689.35 | 89.682  | 12270 | 3 | 897.12  | -0.54  |
| Q8ZQ40 WRBA_SALTY Flavoprotein wrbA;                                      | 4  |                      | ILVLYYSMYGHITMAHAVAEGA K                           | 3   | 24 | 4  | 19.44 | b9y5y11y17                                             | 2667.36 | 66.576  | 6717  | 4 | 667.60  | 10.34  |
| Q8ZQ40 WRBA_SALTY Flavoprotein wrbA;                                      | 5  |                      | QPSQEELSIAR                                        | 172 | 11 | 3  | 31.29 | b6b9b10                                                | 1257.62 | 49.681  | 4662  | 2 | 629.31  | -19.02 |

|                                           |    |  |                                      |     |    |    |        |                                                   |         |         |       |   |         |        |
|-------------------------------------------|----|--|--------------------------------------|-----|----|----|--------|---------------------------------------------------|---------|---------|-------|---|---------|--------|
| Q8ZQ40 WRBA_SALTY Flavoprotein wrbA;      | 6  |  | VPETMPPEIFAK                         | 38  | 12 | 3  | 22.27  | b5b11y10                                          | 1358.73 | 57.738  | 3294  | 3 | 453.58  | 20.93  |
| Q8ZQ40 WRBA_SALTY Flavoprotein wrbA;      | 7  |  | TFLDQTGGLWASGSLYGK                   | 88  | 18 | 5  | 15.58  | b11y8°y8y14*y14                                   | 1900.91 | 97.039  | 1719  | 2 | 950.96  | -18.11 |
| Q8ZQ40 WRBA_SALTY Flavoprotein wrbA;      | 8  |  | GGTPYGATTIAGDGSRQPSQEEL SIAR         | 155 | 28 | 7  | 40.35  | b9y10*y10y18y23y24y25                             | 2776.35 | 54.951  | 17117 | 3 | 926.12  | 0.79   |
| Q8ZQ40 WRBA_SALTY Flavoprotein wrbA;      | 9  |  | TQNAPVATPQELADYDAIIFGTPT RFGNMSGQMR  | 54  | 34 | 4  | 22.92  | b6b9b10°b10                                       | 3697.82 | 122.059 | 17020 | 4 | 925.21  | 13.80  |
| Q8ZQ40 WRBA_SALTY Flavoprotein wrbA;      | 10 |  | MAKILVLYYSMYGHETMAHAVA EGAK          | 0   | 27 | 3  | 17.98  | y5y8y15                                           | 2997.53 | 88.836  | 4547  | 3 | 999.85  | 10.18  |
| Q8ZQ40 WRBA_SALTY Flavoprotein wrbA;      | 11 |  | LGSVFSSTGTGGGQEQTITSTWTT LA          | 106 | 26 | 0  | 17.8   |                                                   | 2587.26 | 116.086 | 1872  | 3 | 863.09  | 1.32   |
| Q56073 DNAK_SALTY Chaperone protein dnaK; | 1  |  | IINEPTAAALAYGLDKEVGNR                | 167 | 21 | 18 | 114.17 | b2b3b7y1y3y5°y5y7*y7y10°y10y11y12*y12y14y17y19y21 | 2215.16 | 74.814  | 42791 | 3 | 739.06  | -5.84  |
| Q56073 DNAK_SALTY Chaperone protein dnaK; | 2  |  | QAVTNPQNTLFAIKR                      | 56  | 15 | 4  | 34.67  | b15y4y5y6                                         | 1700.92 | 58.746  | 25800 | 3 | 567.65  | -11.91 |
| Q56073 DNAK_SALTY Chaperone protein dnaK; | 3  |  | TAEDYLGEVPVTEAVITVPAYFNDA QR         | 125 | 26 | 7  | 34.79  | y3y9y11y12*y12y23y26                              | 2869.40 | 93.291  | 21497 | 3 | 957.14  | 5.11   |
| Q56073 DNAK_SALTY Chaperone protein dnaK; | 4  |  | ASSGLNEEEIQK                         | 502 | 12 | 11 | 68.92  | b2°b2y1y3y5y7°y7y9°y9y10y12                       | 1304.63 | 34.672  | 15968 | 2 | 652.82  | -2.06  |
| Q56073 DNAK_SALTY Chaperone protein dnaK; | 5  |  | MQELAQVSQK                           | 587 | 10 | 6  | 28.66  | b1b2b7b8y3y10                                     | 1161.59 | 37.193  | 15089 | 2 | 581.30  | -6.31  |
| Q56073 DNAK_SALTY Chaperone protein dnaK; | 6  |  | NDPLAMQR                             | 253 | 8  | 6  | 33.08  | b3°b3y3y4*y4y8                                    | 944.46  | 39.255  | 13947 | 2 | 472.73  | -3.94  |
| Q56073 DNAK_SALTY Chaperone protein dnaK; | 7  |  | QAVTNPQNTLFAIK                       | 56  | 14 | 6  | 30.73  | b4°b4b11°b11b12y3                                 | 1544.84 | 67.255  | 5457  | 2 | 772.92  | -2.92  |
| Q56073 DNAK_SALTY Chaperone protein dnaK; | 8  |  | TFEVLATNGDTHLGGEDFDTR                | 214 | 21 | 4  | 21.69  | b6b8b11y10                                        | 2295.07 | 65.257  | 4938  | 4 | 574.52  | 7.45   |
| Q56073 DNAK_SALTY Chaperone protein dnaK; | 9  |  | TTPSIIAYTQDGETLVGQPAK                | 34  | 21 | 5  | 23.52  | b3b4b12b21°b21                                    | 2190.10 | 92.404  | 2998  | 3 | 730.70  | -14.94 |
| Q56073 DNAK_SALTY Chaperone protein dnaK; | 10 |  | GMPQIEVTFDIDADGILHVSADKDK            | 467 | 24 | 3  | 12.7   | b12b14y13                                         | 2599.32 | 102.723 | 1767  | 3 | 867.11  | 4.60   |
| Q56073 DNAK_SALTY Chaperone protein dnaK; | 11 |  | TIAYVDLGGGTFDISIIEIDEVDGE K          | 188 | 26 | 10 | 49.1   | b6°b6b12b13y3y5y10°y10y11y13                      | 2769.38 | 123.879 | 29098 | 3 | 923.80  | 3.00   |
| Q56073 DNAK_SALTY Chaperone protein dnaK; | 12 |  | SIEPLK                               | 315 | 6  | 2  | 13.62  | b3°b3                                             | 686.41  | 49.233  | 7431  | 1 | 686.41  | 6.67   |
| Q56073 DNAK_SALTY Chaperone protein dnaK; | 13 |  | AAIEAK                               | 581 | 6  | 1  | 13.62  | b4                                                | 602.35  | 31.904  | 7229  | 1 | 602.35  | -8.21  |
| Q56073 DNAK_SALTY Chaperone protein dnaK; | 14 |  | FEELVQTR                             | 528 | 8  | 4  | 33.08  | b6y6y7°y7                                         | 1021.54 | 64.457  | 6034  | 2 | 511.27  | 4.48   |
| Q56073 DNAK_SALTY Chaperone protein dnaK; | 15 |  | MPMVQK                               | 345 | 6  | 1  | 13.62  | y4                                                | 733.37  | 31.608  | 5392  | 1 | 733.37  | -5.24  |
| Q56073 DNAK_SALTY Chaperone protein dnaK; | 16 |  | MAPPQISAEVLK                         | 109 | 12 | 3  | 32.48  | b4b6b10                                           | 1283.70 | 82.346  | 4123  | 2 | 642.35  | -5.90  |
| Q56073 DNAK_SALTY Chaperone protein dnaK; | 17 |  | NQGDHLLHSTR                          | 536 | 11 | 5  | 38.31  | b4b6y4°y4y5                                       | 1277.63 | 43.590  | 4119  | 2 | 639.32  | -0.38  |
| Q56073 DNAK_SALTY Chaperone protein dnaK; | 18 |  | VLENAEGDR                            | 25  | 9  | 3  | 30.48  | b3b4y5                                            | 1002.50 | 110.877 | 2584  | 1 | 1002.50 | 17.72  |
| Q56073 DNAK_SALTY Chaperone protein dnaK; | 19 |  | MQELAQVSQKLMEIAQQQHAQQ QAGSADASANNAK | 587 | 35 | 4  | 15.08  | b9y4y9y16                                         | 3752.86 | 66.858  | 35512 | 5 | 751.38  | 13.73  |
| Q56073 DNAK_SALTY Chaperone protein dnaK; | 20 |  | KTAEDYLGEVPVTEAVITVPAYFND AQR        | 124 | 27 | 3  | 11.9   | b9y10y12                                          | 2997.50 | 85.453  | 17624 | 3 | 999.84  | 4.56   |
| Q56073 DNAK_SALTY Chaperone protein dnaK; | 21 |  | DVSIMPYKIIGADNGDAWLVDK               | 84  | 22 | 3  | 13.43  | b3b9y13                                           | 2420.25 | 104.386 | 13450 | 4 | 605.82  | 12.21  |
| Q56073 DNAK_SALTY Chaperone protein dnaK; | 22 |  | KQVEEAGDK                            | 547 | 9  | 5  | 30.48  | b8°b8°b8y4y7                                      | 1003.49 | 37.756  | 9546  | 2 | 502.25  | -12.16 |



|                                              |    |                                        |                                      |     |    |    |       |                                                      |         |         |       |   |         |        |
|----------------------------------------------|----|----------------------------------------|--------------------------------------|-----|----|----|-------|------------------------------------------------------|---------|---------|-------|---|---------|--------|
| Q56073 DNAK_SALTY Chaperone protein dnaK;    | 23 | Carbamidomethyl+C(12)                  | IIGIDLGTNSCVAIMDGTQARVLE<br>NAEGDR   | 3   | 31 | 14 | 44.17 | b12°b12*b12b14*b14b16*<br>b16b18*b18b19y13y14°y14y16 | 3289.65 | 136.792 | 6186  | 2 | 1645.33 | 9.35   |
| Q56073 DNAK_SALTY Chaperone protein dnaK;    | 24 |                                        | VLENAEGDRTPPSIIAYTQDGETL<br>VGQPAK   | 25  | 30 | 5  | 14.16 | b11*b11b13y11y14                                     | 3173.61 | 70.411  | 3228  | 3 | 1058.54 | 3.23   |
| Q56073 DNAK_SALTY Chaperone protein dnaK;    | 25 | Phosphoryl STY(9)                      | QAVTNPQNTLFAIKR                      | 56  | 15 | 8  | 39.92 | b4*b4b7*b7b8*b8b10y12                                | 1780.91 | 81.293  | 7212  | 2 | 890.96  | 6.31   |
| Q56073 DNAK_SALTY Chaperone protein dnaK;    | 26 | Phosphoryl STY(9)                      | TTPSIIAYTQDGETLVGQPAK                | 34  | 21 | 6  | 35.19 | b3b5b10_H3PO4<br>b10y11y12*y12                       | 2270.12 | 136.258 | 3336  | 2 | 1135.56 | 14.20  |
| Q56073 DNAK_SALTY Chaperone protein dnaK;    | 27 | Oxidation+M(2)                         | GMPQIEVTFDIDADGILHVS AK              | 467 | 22 | 5  | 13.43 | b6°b6b13°b13y13                                      | 2372.19 | 93.460  | 3611  | 2 | 1186.60 | 2.88   |
| Q56073 DNAK_SALTY Chaperone protein dnaK;    | 28 |                                        | QAVTNPQNTLFAIK                       | 56  | 14 | 0  | 3.64  |                                                      | 1526.83 | 67.272  | 3923  | 3 | 509.62  | 2.00   |
| P0A1P6 GLNA_SALTY Glutamine synthetase;      | 1  |                                        | LVPGYEAPVMLAYSAR                     | 322 | 16 | 6  | 37.87 | b15y4y5y9y14y16                                      | 1736.91 | 77.431  | 27446 | 2 | 868.96  | 3.51   |
| P0A1P6 GLNA_SALTY Glutamine synthetase;      | 2  |                                        | AINALANPTTNSYKR                      | 307 | 15 | 9  | 57.57 | b2b3*b3b4y5y7y8y9y15                                 | 1633.86 | 42.804  | 25281 | 3 | 545.29  | -5.23  |
| P0A1P6 GLNA_SALTY Glutamine synthetase;      | 3  | Carbamidomethyl+C(1)                   | CDILEPGTLQGYDRDPR                    | 89  | 17 | 7  | 22.92 | b2b3b10y1y2y7y11                                     | 2004.94 | 59.923  | 21814 | 3 | 668.98  | -2.13  |
| P0A1P6 GLNA_SALTY Glutamine synthetase;      | 4  |                                        | GGYFPVPPVDSAQDIR                     | 177 | 16 | 5  | 17.15 | b14b16y1y5y8                                         | 1717.88 | 57.259  | 17315 | 3 | 573.30  | 12.51  |
| P0A1P6 GLNA_SALTY Glutamine synthetase;      | 5  |                                        | AGGVFTDEAIDAYIALR                    | 430 | 17 | 3  | 23.71 | b4b10b16                                             | 1781.93 | 76.064  | 12578 | 3 | 594.65  | 10.89  |
| P0A1P6 GLNA_SALTY Glutamine synthetase;      | 6  |                                        | FGASISGSHVAIDIEGAWNSSTK              | 140 | 24 | 7  | 32.89 | b6b15°b15y4y8y9y15                                   | 2449.18 | 82.295  | 9969  | 3 | 817.06  | 5.68   |
| P0A1P6 GLNA_SALTY Glutamine synthetase;      | 7  |                                        | ATGIADTVLFGPEPEFFLFDDIR              | 117 | 23 | 10 | 43.65 | b13°b13y1y2y4°y4y5y8y12y13                           | 2570.27 | 116.971 | 9393  | 3 | 857.43  | -5.98  |
| P0A1P6 GLNA_SALTY Glutamine synthetase;      | 8  |                                        | GINESDMVLPDASTAVIDPFFAD<br>STLIIR    | 59  | 30 | 3  | 21.98 | b10y11y12                                            | 3238.61 | 113.240 | 9516  | 3 | 1080.21 | 1.58   |
| P0A1P6 GLNA_SALTY Glutamine synthetase;      | 9  |                                        | AINALANPTTNSYK                       | 307 | 14 | 3  | 19.28 | b11y7y9                                              | 1477.76 | 47.867  | 8329  | 2 | 739.38  | -2.89  |
| P0A1P6 GLNA_SALTY Glutamine synthetase;      | 10 |                                        | NGTNLFSGDK                           | 277 | 10 | 4  | 41.67 | y3y6y8°y8                                            | 1052.51 | 59.865  | 7857  | 2 | 526.76  | 4.87   |
| P0A1P6 GLNA_SALTY Glutamine synthetase;      | 11 |                                        | MSAEHVLTMLNEHEVK                     | 0   | 16 | 3  | 17.15 | b8y7y14                                              | 1867.89 | 99.295  | 5827  | 3 | 623.30  | -5.10  |
| P0A1P6 GLNA_SALTY Glutamine synthetase;      | 12 | Carbamidomethyl+C(1)                   | CDILEPGTLQGYDR                       | 89  | 14 | 5  | 19.28 | b7y3°y3y6°y6                                         | 1636.77 | 30.170  | 4554  | 3 | 546.26  | 3.73   |
| P0A1P6 GLNA_SALTY Glutamine synthetase;      | 13 |                                        | SAEHVLTMLNEHEVK                      | 1   | 15 | 6  | 31.81 | b12b14°b14y12°y12y13                                 | 1736.84 | 136.782 | 4066  | 1 | 1736.84 | -13.56 |
| P0A1P6 GLNA_SALTY Glutamine synthetase;      | 14 |                                        | AEDYLR                               | 111 | 6  | 2  | 26.84 | y4y5                                                 | 766.37  | 41.986  | 3845  | 1 | 766.37  | -1.43  |
| P0A1P6 GLNA_SALTY Glutamine synthetase;      | 15 |                                        | EIPQVAGSLEEALNALDLDR                 | 406 | 20 | 11 | 36.24 | b4°b4*b4b8b10°b10y3y7°y7y9°y9                        | 2153.10 | 93.490  | 3716  | 3 | 718.37  | -3.86  |
| P0A1P6 GLNA_SALTY Glutamine synthetase;      | 16 |                                        | IHPGEAMDKNLYDLPEEAK                  | 386 | 20 | 5  | 36.13 | b9b10y6y8y14                                         | 2267.12 | 98.420  | 56241 | 3 | 756.38  | 6.46   |
| P0A1P6 GLNA_SALTY Glutamine synthetase;      | 17 |                                        | LVPGYEAPVMLAYSARNR                   | 322 | 18 | 3  | 22.98 | b7b8y4                                               | 2007.07 | 100.906 | 18089 | 2 | 1004.04 | 11.98  |
| P0A1P6 GLNA_SALTY Glutamine synthetase;      | 18 | Carbamidomethyl+C(11)                  | FPDPAANPYLCFAALLMAGLDGIK<br>NK       | 360 | 26 | 9  | 34.79 | b3b5b10°b10*b10b11°b11b13y18                         | 2807.41 | 128.570 | 10972 | 3 | 936.48  | -4.70  |
| P0A1P6 GLNA_SALTY Glutamine synthetase;      | 19 | Carbamidomethyl+C(4);<br>Oxidation+M() | SEMCLVMEQMGLVVEAHHHEVA<br>TAGQNEVATR | 193 | 32 | 4  | 22.79 | y11y13y14*y14                                        | 3579.66 | 84.874  | 4764  | 3 | 1193.89 | 3.89   |
| P0A1P6 GLNA_SALTY Glutamine synthetase;      | 20 |                                        | FTDEAIDAYIALR                        | 434 | 13 | 2  | 13.88 | b6b10                                                | 1497.76 | 76.089  | 9821  | 2 | 749.38  | 1.55   |
| P0A1P6 GLNA_SALTY Glutamine synthetase;      | 21 |                                        | NALANPTTNSYKR                        | 309 | 13 | 0  | 4.05  |                                                      | 1449.73 | 42.803  | 2421  | 2 | 725.37  | -7.83  |
| P0A1P6 GLNA_SALTY Glutamine synthetase;      | 22 |                                        | LVPGYEAPVMLAY                        | 322 | 13 | 1  | 7.25  | y12                                                  | 1422.75 | 77.426  | 2193  | 2 | 711.88  | 12.10  |
| P26976 PHON_SALTY Non-ecific acid phohatase; | 1  |                                        | IFSPVVGAK                            | 85  | 9  | 5  | 38.26 | y1y3y6y7y9                                           | 917.54  | 51.173  | 55085 | 2 | 459.27  | -10.24 |

|                                                                           |    |                      |                                          |     |    |   |       |                       |         |         |       |   |         |        |
|---------------------------------------------------------------------------|----|----------------------|------------------------------------------|-----|----|---|-------|-----------------------|---------|---------|-------|---|---------|--------|
| [P26976]PHON_SALTY Non-ecific acid phohatase;                             | 2  |                      | LQTIPAFQK                                | 215 | 9  | 9 | 54.49 | b2*b2y2y3y4y5*y5y7y9  | 1045.59 | 55.037  | 51256 | 2 | 523.30  | -12.38 |
| [P26976]PHON_SALTY Non-ecific acid phohatase;                             | 3  |                      | NGSYPSGHTAYGTLLALVLSEARPER               | 150 | 26 | 8 | 12.14 | b2b3°b3*b3y2y16y22y26 | 2759.37 | 96.158  | 39597 | 4 | 690.60  | -13.54 |
| [P26976]PHON_SALTY Non-ecific acid phohatase;                             | 4  |                      | NLLTMGGYYATASAK                          | 108 | 15 | 5 | 29.43 | b11y1y9y11y12         | 1560.77 | 69.694  | 35262 | 2 | 780.89  | 0.31   |
| [P26976]PHON_SALTY Non-ecific acid phohatase;                             | 5  |                      | YVGAVEFAR                                | 206 | 9  | 5 | 59.92 | b3b4y4y7y8            | 1011.52 | 51.287  | 27169 | 2 | 506.26  | -9.90  |
| [P26976]PHON_SALTY Non-ecific acid phohatase;                             | 6  |                      | DTPETWNMLK                               | 98  | 10 | 4 | 41.67 | y4y6y8*y8             | 1234.58 | 65.048  | 10246 | 2 | 617.80  | 5.34   |
| [P26976]PHON_SALTY Non-ecific acid phohatase;                             | 7  |                      | QAAEDADVSVENIAR                          | 70  | 15 | 4 | 37.88 | b4y3y4y5              | 1587.78 | 40.134  | 9353  | 2 | 794.40  | 14.84  |
| [P26976]PHON_SALTY Non-ecific acid phohatase;                             | 8  |                      | VREELNDK                                 | 228 | 8  | 5 | 33.08 | b4°b4y3y4y8           | 1002.54 | 25.386  | 7550  | 2 | 501.77  | 14.12  |
| [P26976]PHON_SALTY Non-ecific acid phohatase;                             | 9  | Carbamidomethyl+C(3) | VICGAHWQSDVDAGR                          | 191 | 15 | 6 | 47.57 | b6b7b11b13y6y9        | 1670.81 | 59.734  | 34177 | 2 | 835.91  | 21.41  |
| [P26976]PHON_SALTY Non-ecific acid phohatase;                             | 10 |                      | YTSAETVQPFHSPPEESVNSQFYLP<br>PPPGNDDPAYR | 16  | 35 | 3 | 10.93 | b7b12y7               | 3936.84 | 122.075 | 1694  | 3 | 1312.95 | 10.98  |
| [P26976]PHON_SALTY Non-ecific acid phohatase;                             | 11 |                      | WKQAAEDADVSVENIAR                        | 68  | 17 | 6 | 36.13 | b4b6b7b10°b10y12      | 1901.96 | 72.868  | 4069  | 3 | 634.66  | 11.17  |
| [P26976]PHON_SALTY Non-ecific acid phohatase;                             | 12 |                      | YVGAVEFARLQTIPAFQK                       | 206 | 18 | 4 | 15.58 | b6°b6b8y5             | 2038.11 | 82.592  | 3182  | 3 | 680.04  | 0.24   |
| [P26976]PHON_SALTY Non-ecific acid phohatase;                             | 13 | Oxidation+M(12)      | INPKDTPETWNMLK                           | 94  | 14 | 4 | 24.72 | b10°b10y8y9           | 1702.85 | 79.383  | 4349  | 2 | 851.93  | 3.66   |
| [P26976]PHON_SALTY Non-ecific acid phohatase;                             | 14 | Oxidation+M(5)       | NLLTMGGYYATASAK                          | 108 | 15 | 7 | 58.87 | b9b11b12y4y10y11y13   | 1576.77 | 81.642  | 1855  | 3 | 526.26  | 1.32   |
| [P26976]PHON_SALTY Non-ecific acid phohatase;                             | 15 |                      | GAVEFAR                                  | 208 | 7  | 0 | 1.62  |                       | 749.39  | 51.299  | 4534  | 1 | 749.39  | -7.90  |
| [P26976]PHON_SALTY Non-ecific acid phohatase;                             | 16 |                      | IFSPVVGAK                                | 85  | 9  | 0 | 1.62  |                       | 899.53  | 51.168  | 5403  | 2 | 450.27  | -2.37  |
| [P02911]ARGT_SALTY Lysine-arginine-ornithine-binding periplasmic protein; | 1  |                      | IGTDTTYAPFSSK                            | 29  | 13 | 4 | 29.88 | y3y5y12y13            | 1387.67 | 53.084  | 41232 | 2 | 694.34  | -2.29  |
| [P02911]ARGT_SALTY Lysine-arginine-ornithine-binding periplasmic protein; | 2  | Carbamidomethyl+C(1) | CTWVASDFDALIPSLK                         | 66  | 16 | 7 | 44.97 | b3b12y3y4y11y13y16    | 1822.92 | 97.991  | 38844 | 2 | 911.96  | 6.03   |
| [P02911]ARGT_SALTY Lysine-arginine-ornithine-binding periplasmic protein; | 3  |                      | LDAALQDEVAASEGFLK                        | 176 | 17 | 5 | 16.31 | b9°b9y2y5y14          | 1776.88 | 123.834 | 2387  | 2 | 888.94  | -13.12 |
| [P02911]ARGT_SALTY Lysine-arginine-ornithine-binding periplasmic protein; | 4  |                      | HVGVLQGSTQEAYANDNWR                      | 134 | 19 | 5 | 31.62 | b4b12y6y7y9           | 2145.00 | 54.128  | 37849 | 3 | 715.67  | -6.15  |
| [P02911]ARGT_SALTY Lysine-arginine-ornithine-binding periplasmic protein; | 5  |                      | YFGDGTGVGLR                              | 211 | 11 | 3 | 27.31 | b10y9y10              | 1141.57 | 55.798  | 13956 | 2 | 571.29  | 1.92   |
| [P02911]ARGT_SALTY Lysine-arginine-ornithine-binding periplasmic protein; | 6  |                      | AAFDK                                    | 229 | 5  | 1 | 13.22 | y4                    | 551.29  | 35.788  | 7006  | 1 | 551.29  | 11.74  |
| [P02911]ARGT_SALTY Lysine-arginine-ornithine-binding periplasmic protein; | 7  |                      | QPAGK                                    | 193 | 5  | 1 | 13.22 | b3                    | 500.28  | 45.487  | 6866  | 1 | 500.28  | 1.77   |
| [P02911]ARGT_SALTY Lysine-arginine-ornithine-binding periplasmic protein; | 8  |                      | GVDVVAYANQDLIYSDLTAGR                    | 155 | 21 | 3 | 13.87 | b8y7y9                | 2240.12 | 91.081  | 4518  | 3 | 747.38  | 1.74   |
| [P02911]ARGT_SALTY Lysine-arginine-ornithine-binding periplasmic protein; | 9  |                      | DDTELK                                   | 223 | 6  | 1 | 13.62 | y5                    | 720.35  | 84.816  | 1734  | 1 | 720.35  | 14.74  |

|                                                                           |    |                                           |                                                             |     |    |   |       |                         |         |         |       |   |         |        |
|---------------------------------------------------------------------------|----|-------------------------------------------|-------------------------------------------------------------|-----|----|---|-------|-------------------------|---------|---------|-------|---|---------|--------|
| [P02911 ARGT_SALTY Lysine-arginine-ornithine-binding periplasmic protein; | 10 |                                           | GVDVVAYANQDLIYSDLTAGRLD<br>AALQDEVAASEGFLK                  | 155 | 38 | 4 | 14.51 | b11y5y11y14             | 3997.98 | 102.585 | 38241 | 4 | 1000.25 | -4.52  |
| [P02911 ARGT_SALTY Lysine-arginine-ornithine-binding periplasmic protein; | 11 |                                           | QQEIAFSDKLYAADSR                                            | 99  | 16 | 7 | 56.14 | b4b7b8b10y5y6y9         | 1841.89 | 93.450  | 8259  | 2 | 921.45  | -5.63  |
| [P02911 ARGT_SALTY Lysine-arginine-ornithine-binding periplasmic protein; | 12 |                                           | RQQEIAFSDK                                                  | 98  | 10 | 3 | 33.89 | b3b4b9                  | 1221.63 | 79.858  | 6365  | 2 | 611.32  | 8.89   |
| [P02911 ARGT_SALTY Lysine-arginine-ornithine-binding periplasmic protein; | 13 |                                           | IGTDTTYAPFSSKDAK                                            | 29  | 16 | 5 | 41.67 | b4b7b11b14y7            | 1701.83 | 112.604 | 2198  | 2 | 851.42  | -2.22  |
| [P02911 ARGT_SALTY Lysine-arginine-ornithine-binding periplasmic protein; | 14 | Carbamidomethyl+C(15)<br>;Oxidation+M(14) | GEFIGFDIDLGNECK                                             | 45  | 16 | 3 | 17.15 | b11y3y7                 | 1860.81 | 26.904  | 5373  | 3 | 620.94  | -0.52  |
| [P0A1V4 KAD_SALTY Adenylate kinase;                                       | 1  |                                           | VDGTQAVADVR                                                 | 195 | 11 | 8 | 41.49 | b4°b4y2y4°y4y8°y8y10    | 1130.58 | 36.632  | 48804 | 2 | 565.79  | -0.22  |
| [P0A1V4 KAD_SALTY Adenylate kinase;                                       | 2  |                                           | LVEYHQMTAPLIGYYQK                                           | 167 | 17 | 9 | 33.99 | b7°b7b11b17y1y5y6y10y17 | 2054.03 | 69.088  | 39210 | 3 | 685.35  | -6.06  |
| [P0A1V4 KAD_SALTY Adenylate kinase;                                       | 3  |                                           | YGIPQISTGDMLR                                               | 23  | 13 | 6 | 34.06 | b2b5y4y7y10y13          | 1450.73 | 72.603  | 35911 | 2 | 725.87  | -1.09  |
| [P0A1V4 KAD_SALTY Adenylate kinase;                                       | 4  |                                           | NGFLLDGFPR                                                  | 78  | 10 | 7 | 55.55 | b2b6b9y4y5y6y10         | 1135.59 | 80.525  | 33400 | 2 | 568.30  | -3.98  |
| [P0A1V4 KAD_SALTY Adenylate kinase;                                       | 5  |                                           | IILLGAPGAGK                                                 | 2   | 11 | 7 | 52.95 | b2b3y2y5y6y7y9          | 1009.63 | 61.069  | 16093 | 2 | 505.32  | -10.94 |
| [P0A1V4 KAD_SALTY Adenylate kinase;                                       | 6  |                                           | LVEYHQMTAPLIGYYQKEAEGN<br>TK                                | 167 | 25 | 3 | 21.94 | b7b8y6                  | 2854.37 | 96.980  | 6702  | 3 | 952.13  | -14.80 |
| [P0A1V4 KAD_SALTY Adenylate kinase;                                       | 7  |                                           | DDVTGEDLTTR                                                 | 145 | 11 | 3 | 31.29 | y6y8y9                  | 1221.54 | 69.033  | 5026  | 1 | 1221.54 | -15.69 |
| [P0A1V4 KAD_SALTY Adenylate kinase;                                       | 8  |                                           | IILLGAPGAGKGTQAQFIMEK                                       | 2   | 21 | 6 | 44.75 | b3y9y12y15y17y19        | 2143.18 | 72.619  | 26847 | 3 | 715.06  | -8.09  |
| [P0A1V4 KAD_SALTY Adenylate kinase;                                       | 9  |                                           | GTQAQFIMEKYGIPQISTGDMLR                                     | 13  | 23 | 3 | 13.04 | b12y6y9                 | 2584.27 | 75.371  | 3881  | 3 | 862.10  | -7.27  |
| [P0A1V4 KAD_SALTY Adenylate kinase;                                       | 10 |                                           | VEGKDDVTGEDLTTR                                             | 141 | 15 | 3 | 18.13 | b3b9y9                  | 1634.81 | 84.669  | 2553  | 3 | 545.61  | 12.84  |
| [P0A1V4 KAD_SALTY Adenylate kinase;                                       | 11 | Phosphoryl STY(8)                         | LVEYHQMTAPLIGYYQK                                           | 167 | 17 | 5 | 46.47 | b3b5b6b8b10_HPO3 b10    | 2134.01 | 42.698  | 1758  | 4 | 534.26  | 5.61   |
| [P0A1V4 KAD_SALTY Adenylate kinase;                                       | 12 | Oxidation+M(8)                            | GTQAQFIMEK                                                  | 13  | 10 | 9 | 65.76 | b3°b3b5°b5b6y3y4°y4y8   | 1168.57 | 60.414  | 4618  | 2 | 584.79  | 6.27   |
| [P67557 OPGG_SALTY Glucans biosynthesis protein G;                        | 1  |                                           | VIGAGQVYGLSAR                                               | 158 | 13 | 7 | 41.33 | b2y6y7y9*y9y11*y11      | 1290.71 | 55.612  | 31749 | 2 | 645.86  | -2.93  |
| [P67557 OPGG_SALTY Glucans biosynthesis protein G;                        | 2  |                                           | FVIIPGRDVTVDVQSK                                            | 219 | 16 | 4 | 25.53 | b2y4y12y13              | 1772.97 | 64.755  | 26436 | 3 | 591.66  | -11.70 |
| [P67557 OPGG_SALTY Glucans biosynthesis protein G;                        | 3  |                                           | GLAIDTALPSGEEFPR                                            | 171 | 16 | 8 | 52.75 | b2b6b11y2y8y9y12y13     | 1672.85 | 72.894  | 12772 | 2 | 836.93  | -4.09  |
| [P67557 OPGG_SALTY Glucans biosynthesis protein G;                        | 4  |                                           | YADYQQIQFNSDK                                               | 55  | 13 | 4 | 20.63 | b8b10y9*y9              | 1619.74 | 52.174  | 7535  | 2 | 810.37  | 4.07   |
| [P67557 OPGG_SALTY Glucans biosynthesis protein G;                        | 5  |                                           | YSPDYFNFGNVQHDK                                             | 107 | 15 | 7 | 46.91 | b12y6*y6y7y9*y9y10      | 1830.81 | 36.407  | 4971  | 3 | 610.94  | 0.93   |
| [P67557 OPGG_SALTY Glucans biosynthesis protein G;                        | 6  |                                           | QPDGTIAFVVDFVGADMK                                          | 419 | 18 | 4 | 21.74 | b6b8y4y10               | 1909.93 | 117.124 | 4745  | 2 | 955.47  | -1.92  |
| [P67557 OPGG_SALTY Glucans biosynthesis protein G;                        | 7  |                                           | VELVEIPTNDETNDNIWAYWTPDQ<br>LPEPGK                          | 347 | 30 | 6 | 35.35 | b11b12y1y6y11y12        | 3396.62 | 120.431 | 3754  | 3 | 1132.88 | -8.91  |
| [P67557 OPGG_SALTY Glucans biosynthesis protein G;                        | 8  |                                           | SNLPSVFRDMK                                                 | 44  | 11 | 4 | 38.31 | b6b8y8y9                | 1293.66 | 56.041  | 2665  | 2 | 647.33  | -1.60  |
| [P67557 OPGG_SALTY Glucans biosynthesis protein G;                        | 9  |                                           | LGVAPLTSMFLEGPNQPSPTTNYR<br>PELHDSNGLSIHAGNGEWIWRPLN<br>NPK | 244 | 51 | 6 | 13.52 | b14b16y11*y11y19y29     | 5640.71 | 136.743 | 4862  | 5 | 1128.95 | -20.43 |

|                                                                                 |    |                                             |                                  |     |    |    |        |                                                         |         |         |        |   |         |        |
|---------------------------------------------------------------------------------|----|---------------------------------------------|----------------------------------|-----|----|----|--------|---------------------------------------------------------|---------|---------|--------|---|---------|--------|
| [P67557]OPGG_SALTY Glucans biosynthesis protein G;                              | 10 |                                             | WLGAAIMLTLYASSSWAFSIDDV AK       | 5   | 25 | 4  | 18.62  | y6y8y10°y10                                             | 2716.42 | 81.374  | 3277   | 2 | 1358.72 | 19.77  |
| [P67557]OPGG_SALTY Glucans biosynthesis protein G;                              | 11 |                                             | YDLRPSAWITPKGDWGK                | 328 | 17 | 4  | 26.14  | b3b5b14y4                                               | 1989.99 | 79.112  | 6265   | 2 | 995.50  | -12.02 |
| [P67557]OPGG_SALTY Glucans biosynthesis protein G;                              | 12 |                                             | IKYSPDYFNFNGVQHDK                | 105 | 17 | 4  | 16.31  | b9°b9y11y13                                             | 2071.99 | 110.348 | 4577   | 2 | 1036.50 | 2.47   |
| [P67557]OPGG_SALTY Glucans biosynthesis protein G;                              | 13 |                                             | TPFKLEFYHQGMFYDTPVK              | 75  | 19 | 4  | 20.69  | b3b6y4y9                                                | 2348.14 | 42.661  | 2947   | 3 | 783.38  | -3.02  |
| [P67557]OPGG_SALTY Glucans biosynthesis protein G;                              | 14 |                                             | FREFWIERPKPTDK                   | 187 | 14 | 4  | 27.57  | b7b11y6y12                                              | 1848.97 | 106.739 | 2128   | 3 | 616.99  | -4.82  |
| [P67557]OPGG_SALTY Glucans biosynthesis protein G;                              | 15 | Phosphoryl STY(6)                           | YDLRPSAWITPK                     | 328 | 12 | 4  | 22.27  | b4y8y11°y11                                             | 1526.71 | 80.048  | 296162 | 2 | 763.86  | -12.07 |
| [P67557]OPGG_SALTY Glucans biosynthesis protein G;                              | 16 | Oxidation+M(7)                              | NDEIVSMLGASYFR                   | 144 | 14 | 7  | 46.8   | b4b5b6°b6y5°y5y8                                        | 1617.75 | 55.625  | 10625  | 2 | 809.38  | -3.47  |
| [P67557]OPGG_SALTY Glucans biosynthesis protein G;                              | 17 | Oxidation+M(10)                             | SNLPVSFRDMK                      | 44  | 11 | 3  | 24.3   | b7y4y7                                                  | 1309.65 | 37.697  | 10354  | 3 | 437.22  | -4.38  |
| [P67557]OPGG_SALTY Glucans biosynthesis protein G;                              | 18 |                                             | YFNFGNVQHDK                      | 111 | 11 | 0  | 4.05   |                                                         | 1368.65 | 36.364  | 2678   | 2 | 684.83  | 10.26  |
| [Q8ZKP7]TPIS_SALTY Triosephohate isomerase;                                     | 1  |                                             | SATPAQAQAVHK                     | 176 | 12 | 22 | 138.22 | b2b3b5°b5b7°b7y1y2y3y4y5°y5y6°y6y7°y7y8°y8y9y10°y10y12  | 1208.63 | 18.734  | 44726  | 2 | 604.82  | -3.03  |
| [Q8ZKP7]TPIS_SALTY Triosephohate isomerase;                                     | 2  |                                             | TQGAAAFEGAVIAYEPVWAIGTG K        | 152 | 24 | 16 | 58.18  | b1°b1b2°b2b3°b3b4b7°b7b8b9b12b15°y7y12y24               | 2407.26 | 93.455  | 43844  | 2 | 1204.14 | 13.89  |
| [Q8ZKP7]TPIS_SALTY Triosephohate isomerase;                                     | 3  | Carbamidomethyl+C(8)                        | ELTGVAGCDVAIAPPEMYIDLAKR         | 28  | 24 | 8  | 23.42  | b2°b2b7y9y11°y11y12y24                                  | 2589.31 | 82.588  | 40895  | 3 | 863.77  | 1.79   |
| [Q8ZKP7]TPIS_SALTY Triosephohate isomerase;                                     | 4  | Carbamidomethyl+C(8)                        | ELTGVAGCDVAIAPPEMYIDLAK          | 28  | 23 | 8  | 37.26  | b5b6y1y8y10°y10y11y23                                   | 2433.22 | 88.017  | 17764  | 2 | 1217.11 | 5.42   |
| [Q8ZKP7]TPIS_SALTY Triosephohate isomerase;                                     | 5  |                                             | QIDAVLK                          | 145 | 7  | 3  | 37.45  | b6y3y4                                                  | 786.46  | 42.741  | 30032  | 2 | 393.73  | -12.18 |
| [Q8ZKP7]TPIS_SALTY Triosephohate isomerase;                                     | 6  | Carbamidomethyl+C(9)                        | EQGLTPVLCIGETEAENEAGK            | 117 | 21 | 6  | 43.63  | b6b7b8b10y10y12                                         | 2245.03 | 100.333 | 3645   | 4 | 562.01  | -15.99 |
| [Q8ZKP7]TPIS_SALTY Triosephohate isomerase;                                     | 7  |                                             | HMVNELVANLR                      | 16  | 11 | 4  | 31.29  | b3b4°b4b6                                               | 1295.67 | 40.894  | 2402   | 2 | 648.34  | -10.74 |
| [Q8ZKP7]TPIS_SALTY Triosephohate isomerase;                                     | 8  | Carbamidomethyl+C(9); Carbamidomethyl+C(26) | EQGLTPVLCIGETEAENEAGKTEE VCAR    | 117 | 28 | 21 | 163.97 | b3°b3b5°b5b7°b7y3y4y5°y5y6y7y10y12y14y18y20y21y23y24y26 | 3090.45 | 72.112  | 102844 | 3 | 1030.82 | 3.32   |
| [Q8ZKP7]TPIS_SALTY Triosephohate isomerase;                                     | 9  |                                             | MRHPLVMGNWK                      | 0   | 11 | 3  | 31.29  | b3b4b9                                                  | 1368.69 | 54.851  | 15879  | 3 | 456.90  | -7.31  |
| [Q8ZKP7]TPIS_SALTY Triosephohate isomerase;                                     | 10 |                                             | TYHKESDELIAK                     | 99  | 12 | 5  | 32.18  | b9b11°b11y3y8                                           | 1433.75 | 72.783  | 5268   | 3 | 478.59  | 12.94  |
| [Q8ZKP7]TPIS_SALTY Triosephohate isomerase;                                     | 11 |                                             | QIDAVLKTQGAAAFEGAVIAYEPV WAIGTGK | 145 | 31 | 4  | 11.25  | b3°b3b16y18                                             | 3174.66 | 108.035 | 2324   | 3 | 1058.89 | -8.61  |
| [Q8ZKP7]TPIS_SALTY Triosephohate isomerase;                                     | 12 | Carbamidomethyl+C(9)                        | KELTGVAGCDVAIAPPEMYIDLAK         | 27  | 24 | 4  | 28.3   | y3y4y9y12                                               | 2561.27 | 69.046  | 1715   | 2 | 1281.14 | -12.01 |
| [Q8ZKP7]TPIS_SALTY Triosephohate isomerase;                                     | 13 |                                             | TPAQQAQAVHK                      | 178 | 10 | 12 | 79.12  | b3°b3b4°b4b6°b6b7°b7b8°b8°b8b9                          | 1050.56 | 18.751  | 16373  | 2 | 525.79  | -5.93  |
| [Q8ZKP7]TPIS_SALTY Triosephohate isomerase;                                     | 14 |                                             | PAQAQAVHK                        | 179 | 9  | 11 | 79.12  | b3°b3b4b5°b5b6°b6b7°b7b8°b8                             | 949.52  | 18.756  | 13745  | 2 | 475.26  | -4.50  |
| [Q8ZKP7]TPIS_SALTY Triosephohate isomerase;                                     | 15 | Carbamidomethyl+C(8)                        | ELTGVAGC                         | 28  | 8  | 0  | 7.28   |                                                         | 806.38  | 88.076  | 1934   | 1 | 806.38  | 13.62  |
| [Q8ZKP7]TPIS_SALTY Triosephohate isomerase;                                     | 16 |                                             | SATPAQAQAVHK                     | 176 | 12 | 0  | 2.83   |                                                         | 1190.61 | 18.753  | 12910  | 3 | 397.54  | -14.46 |
| [P69936]YDFG_SALTY NADP-dependent L-serine/L-allo-threonine dehydrogenase ydfG; | 1  |                                             | VTDIEPGLVGGTEFSSVR               | 171 | 18 | 18 | 119.64 | b2°b2b5b6°b6b14b15b17°b17y5y6°y6y7y9°y9y11y13y17        | 1862.96 | 69.059  | 25938  | 2 | 931.98  | 4.72   |

|                                                                                 |    |                                             |                            |     |    |    |       |                                             |         |         |       |   |         |        |
|---------------------------------------------------------------------------------|----|---------------------------------------------|----------------------------|-----|----|----|-------|---------------------------------------------|---------|---------|-------|---|---------|--------|
| [P69936]YDFG_SALTY NADP-dependent L-serine/L-allo-threonine dehydrogenase ydfG; | 2  | Carbamidomethyl+C(15)                       | MIVLVTGATAGFGECIARR        | 0   | 19 | 4  | 14.93 | b2b3y7y14                                   | 2022.06 | 80.004  | 21066 | 2 | 1011.54 | 0.97   |
| [P69936]YDFG_SALTY NADP-dependent L-serine/L-allo-threonine dehydrogenase ydfG; | 3  |                                             | AVLPGMVER                  | 115 | 9  | 3  | 38.26 | y5y6y7                                      | 971.52  | 52.962  | 17180 | 2 | 486.27  | -9.74  |
| [P69936]YDFG_SALTY NADP-dependent L-serine/L-allo-threonine dehydrogenase ydfG; | 4  |                                             | AAIEEMMASLPAQWR            | 58  | 15 | 4  | 25.79 | b4b14y5y12                                  | 1703.85 | 90.318  | 9191  | 2 | 852.43  | 12.61  |
| [P69936]YDFG_SALTY NADP-dependent L-serine/L-allo-threonine dehydrogenase ydfG; | 5  |                                             | GHIINIGSTAGSWPYAGGNVYGAT K | 126 | 25 | 3  | 12.4  | b9y5y19                                     | 2491.26 | 64.844  | 37617 | 4 | 623.57  | 8.62   |
| [P69936]YDFG_SALTY NADP-dependent L-serine/L-allo-threonine dehydrogenase ydfG; | 6  |                                             | DELGENVLTAQLDVR            | 41  | 15 | 8  | 54.56 | b3b4b7*b7b8y5*y5y7                          | 1671.83 | 33.083  | 17963 | 3 | 557.95  | -13.58 |
| [P69936]YDFG_SALTY NADP-dependent L-serine/L-allo-threonine dehydrogenase ydfG; | 7  |                                             | TDLHGTAVR                  | 162 | 9  | 6  | 79.16 | b4b5y3y5y6y8                                | 969.49  | 23.060  | 5457  | 2 | 485.25  | -18.57 |
| [P69936]YDFG_SALTY NADP-dependent L-serine/L-allo-threonine dehydrogenase ydfG; | 8  |                                             | ASVEDWETMIDTNNKGLIYMTR     | 93  | 22 | 4  | 22.18 | b3b4*b4y4                                   | 2587.25 | 123.983 | 5677  | 3 | 863.09  | 12.27  |
| [P69936]YDFG_SALTY NADP-dependent L-serine/L-allo-threonine dehydrogenase ydfG; | 9  | Phosphoryl STY(21)                          | GHIINIGSTAGSWPYAGGNVYGAT K | 126 | 25 | 9  | 50.58 | b12b14_H3PO4<br>b13b14b19*b19b20*b20y18*y18 | 2571.17 | 136.844 | 4573  | 2 | 1286.09 | -9.31  |
| [P69936]YDFG_SALTY NADP-dependent L-serine/L-allo-threonine dehydrogenase ydfG; | 10 | Carbamidomethyl+C(14)<br>;Phosphoryl STY(5) | IVLVTGATAGFGECIARR         | 1   | 18 | 5  | 21.74 | b6*b6b9y11y13                               | 1971.01 | 93.538  | 2413  | 3 | 657.67  | 14.49  |
| [P69936]YDFG_SALTY NADP-dependent L-serine/L-allo-threonine dehydrogenase ydfG; | 11 | Oxidation+M(6)                              | AAIEEMMASLPAQWR            | 58  | 15 | 5  | 18.13 | b14y9°y9y14*y14                             | 1719.84 | 93.421  | 31755 | 2 | 860.43  | 13.63  |
| [P69936]YDFG_SALTY NADP-dependent L-serine/L-allo-threonine dehydrogenase ydfG; | 12 | Carbamidomethyl+C(15)<br>;Oxidation+M(1)    | MIVLVTGATAGFGECIAR         | 0   | 18 | 3  | 22.98 | b14b15y7                                    | 1881.97 | 106.431 | 5896  | 2 | 941.49  | 5.51   |
| [Q7CPE2]ATPB_SALTY ATP synthase subunit beta;                                   | 1  |                                             | QLDPLVVGQEHYDTAR           | 343 | 16 | 8  | 68.98 | b2*b2y3y4y5y6y9y10                          | 1840.90 | 57.814  | 52076 | 3 | 614.30  | -12.27 |
| [Q7CPE2]ATPB_SALTY ATP synthase subunit beta;                                   | 2  |                                             | VALTGLTMAEK                | 219 | 11 | 7  | 65.5  | y5y7y8y9y10°y10y11                          | 1133.62 | 59.212  | 46480 | 2 | 567.31  | -5.60  |
| [Q7CPE2]ATPB_SALTY ATP synthase subunit beta;                                   | 3  |                                             | TVNMMELIR                  | 156 | 9  | 8  | 45.46 | b2b3y1y4y7°y7y8y9                           | 1106.57 | 75.852  | 35477 | 2 | 553.79  | -3.86  |
| [Q7CPE2]ATPB_SALTY ATP synthase subunit beta;                                   | 4  |                                             | VGLFGGAGVGK                | 145 | 11 | 5  | 27.31 | b1b3y7y8y11                                 | 961.54  | 58.978  | 34304 | 2 | 481.27  | -8.70  |
| [Q7CPE2]ATPB_SALTY ATP synthase subunit beta;                                   | 5  |                                             | FLSQPFFVAEVFTGSPGK         | 399 | 18 | 5  | 24.5  | y3y6°y6y7y18                                | 1958.02 | 99.461  | 33455 | 2 | 979.51  | 8.10   |
| [Q7CPE2]ATPB_SALTY ATP synthase subunit beta;                                   | 6  |                                             | QIASLGIYPAVDPLDSTSR        | 324 | 19 | 7  | 46.19 | y4y6y11°y11y12y13y19                        | 2003.06 | 80.248  | 33030 | 2 | 1002.03 | 7.50   |
| [Q7CPE2]ATPB_SALTY ATP synthase subunit beta;                                   | 7  |                                             | MPSAVGYQPTLAEEMGVLQER      | 261 | 21 | 13 | 86.63 | b5b7b21y3*y3y4y6y7y8y10y11y13y21            | 2306.13 | 81.361  | 32319 | 2 | 1153.57 | 6.56   |
| [Q7CPE2]ATPB_SALTY ATP synthase subunit beta;                                   | 8  | Carbamidomethyl+C(6)                        | VIDLMCPFAK                 | 132 | 10 | 5  | 47.9  | b7y4y6y8y10                                 | 1193.60 | 80.513  | 30091 | 2 | 597.30  | -2.97  |
| [Q7CPE2]ATPB_SALTY ATP synthase subunit beta;                                   | 9  |                                             | TIAMGSSDGLRR               | 53  | 12 | 8  | 34.24 | b2b6y1y2y4y9y10y12                          | 1263.65 | 37.367  | 23677 | 2 | 632.33  | -1.74  |
| [Q7CPE2]ATPB_SALTY ATP synthase subunit beta;                                   | 10 |                                             | VSLVYQMNPEPPGNR            | 202 | 15 | 6  | 29.43 | b11y5*y5y7y11y15                            | 1660.80 | 54.139  | 23161 | 2 | 830.90  | -8.38  |
| [Q7CPE2]ATPB_SALTY ATP synthase subunit beta;                                   | 11 |                                             | AAPSYEELSNSQELLETKIK       | 112 | 20 | 5  | 14.37 | b8y1y12y15y20                               | 2179.09 | 73.506  | 19525 | 2 | 1090.05 | 5.04   |
| [Q7CPE2]ATPB_SALTY ATP synthase subunit beta;                                   | 12 |                                             | YQELKDIIAILGMDDELSEEDK     | 367 | 21 | 4  | 22.32 | b5b6y1y13                                   | 2452.25 | 86.069  | 11012 | 3 | 818.09  | 13.94  |
| [Q7CPE2]ATPB_SALTY ATP synthase subunit beta;                                   | 13 |                                             | TREGNDFYHEMTDSNVIDK        | 183 | 19 | 3  | 14.93 | b4y7y12                                     | 2271.02 | 66.545  | 6434  | 3 | 757.68  | 11.18  |

|                                              |    |                       |                                 |     |    |    |        |                                                    |         |         |        |   |         |        |
|----------------------------------------------|----|-----------------------|---------------------------------|-----|----|----|--------|----------------------------------------------------|---------|---------|--------|---|---------|--------|
| Q7CPE2 ATPB_SALTY ATP synthase subunit beta; | 14 |                       | VYDALEVQNGNEK                   | 25  | 13 | 3  | 20.63  | b3b11y3                                            | 1478.74 | 70.377  | 1988   | 3 | 493.58  | 18.66  |
| Q7CPE2 ATPB_SALTY ATP synthase subunit beta; | 15 | Carbamidomethyl+C(26) | AAPSYEELSNSQELLETGKVIDLM C PFAK | 112 | 30 | 13 | 86.42  | b5b7°b7b8b15y4y5y6y7y9y10y22y28                    | 3353.67 | 120.430 | 42726  | 3 | 1118.56 | 1.02   |
| Q7CPE2 ATPB_SALTY ATP synthase subunit beta; | 16 |                       | FLSQPFFVAEVFTGSPGKYVSLK         | 399 | 23 | 4  | 19.45  | b6*b6b9b14                                         | 2548.31 | 87.257  | 2802   | 4 | 637.83  | -13.51 |
| Q7CPE2 ATPB_SALTY ATP synthase subunit beta; | 17 |                       | TIAMGSSDGLRR                    | 53  | 12 | 4  | 22.27  | b4°b4b6y8                                          | 1263.65 | 42.724  | 1930   | 2 | 632.33  | 3.09   |
| Q7CPE2 ATPB_SALTY ATP synthase subunit beta; | 18 |                       | IMNVLGEPVDMKGEIGEEER            | 87  | 20 | 3  | 14.37  | b11y7y11                                           | 2245.06 | 84.856  | 1560   | 2 | 1123.03 | -12.07 |
| Q7CPE2 ATPB_SALTY ATP synthase subunit beta; | 19 | Oxidation+M(1)        | MPSAVGYQPTLAEEMGVLQER           | 261 | 21 | 5  | 22.32  | b11°b11b12y10°y10                                  | 2322.13 | 74.194  | 2758   | 3 | 774.72  | 8.73   |
| Q7CPE2 ATPB_SALTY ATP synthase subunit beta; | 20 |                       | AMGSSDGLRR                      | 55  | 10 | 0  | 2.83   |                                                    | 1049.51 | 37.374  | 11683  | 2 | 525.26  | -4.77  |
| Q7CPE2 ATPB_SALTY ATP synthase subunit beta; | 21 |                       | QLDPLVVQGEHYDTAR                | 343 | 16 | 0  | 4.45   |                                                    | 1822.89 | 57.831  | 2261   | 3 | 608.30  | -8.30  |
| P66932 TIG_SALTY Trigger factor;             | 1  |                       | NVALEEQAWEAVLAK                 | 399 | 15 | 8  | 39.92  | b2b3y2y3y4y11y13y15                                | 1583.86 | 79.882  | 54833  | 2 | 792.43  | -1.00  |
| P66932 TIG_SALTY Trigger factor;             | 2  |                       | ANDIDVPSALIDSEIDVLRR            | 296 | 20 | 6  | 25.24  | b2b3b4b8y1y4                                       | 2211.15 | 90.304  | 31411  | 3 | 737.72  | -5.63  |
| P66932 TIG_SALTY Trigger factor;             | 3  |                       | GLIEEMASAYEDPKEVIEFYSK          | 368 | 22 | 5  | 49.16  | b6b7y4y5y6                                         | 2548.18 | 81.503  | 26779  | 3 | 850.07  | -13.70 |
| P66932 TIG_SALTY Trigger factor;             | 4  |                       | ANDIDVPSALIDSEIDVLR             | 296 | 19 | 9  | 47.81  | b2b3b4b10b15y1y3y8y13                              | 2055.06 | 94.394  | 14558  | 2 | 1028.04 | 1.90   |
| P66932 TIG_SALTY Trigger factor;             | 5  |                       | INPAGAPNYVPGEYK                 | 83  | 15 | 9  | 79.24  | b2b10b11y3y5y7y9y13y15                             | 1589.80 | 50.802  | 11889  | 2 | 795.40  | -0.08  |
| P66932 TIG_SALTY Trigger factor;             | 6  |                       | FGVEDGSVAGLR                    | 255 | 12 | 4  | 29.47  | y5y9°y9y10                                         | 1206.60 | 46.374  | 24229  | 2 | 603.80  | -8.60  |
| P66932 TIG_SALTY Trigger factor;             | 7  |                       | SQAIEGLVK                       | 287 | 9  | 7  | 45.46  | b4*b4b7°b7°b7b8y5                                  | 944.55  | 68.954  | 5383   | 2 | 472.78  | 10.47  |
| P66932 TIG_SALTY Trigger factor;             | 8  |                       | VTIDFTGSVDGEEFEGGK              | 163 | 18 | 3  | 15.58  | b5y5y8                                             | 1886.83 | 120.842 | 4487   | 3 | 629.61  | -20.12 |
| P66932 TIG_SALTY Trigger factor;             | 9  |                       | MIPGFEDGVK                      | 193 | 10 | 4  | 51.88  | b4b5b6b9                                           | 1092.53 | 115.133 | 2907   | 1 | 1092.53 | -9.50  |
| P66932 TIG_SALTY Trigger factor;             | 10 |                       | ATDFVLAMGQGR                    | 181 | 12 | 4  | 36.16  | b7b8y6y11                                          | 1265.63 | 69.063  | 2273   | 1 | 1265.63 | -2.70  |
| P66932 TIG_SALTY Trigger factor;             | 11 |                       | ELPELTEEFIK                     | 243 | 11 | 4  | 24.3   | b3b7y8°y8                                          | 1347.71 | 44.896  | 2210   | 2 | 674.36  | 1.99   |
| P66932 TIG_SALTY Trigger factor;             | 12 |                       | GLIEEMASAYEDPKEVIEFYSK          | 368 | 22 | 4  | 18.16  | b6b13y5y12                                         | 2548.22 | 98.265  | 14521  | 3 | 850.08  | 0.38   |
| P66932 TIG_SALTY Trigger factor;             | 13 |                       | EKINPAGAPNYVPGEYK               | 81  | 17 | 4  | 39.15  | y6y11y12y13                                        | 1846.93 | 75.991  | 8448   | 3 | 616.31  | -3.57  |
| P66932 TIG_SALTY Trigger factor;             | 14 |                       | RFGVEDGSVAGLR                   | 254 | 13 | 4  | 20.63  | b9°b9b11y7                                         | 1362.71 | 49.208  | 5307   | 3 | 454.91  | -3.67  |
| P66932 TIG_SALTY Trigger factor;             | 15 |                       | QALELPRELFEEQAK                 | 327 | 15 | 4  | 18.13  | b3y5°y5y12                                         | 1800.97 | 119.478 | 1779   | 3 | 601.00  | 13.96  |
| P66932 TIG_SALTY Trigger factor;             | 16 |                       | VSEKATSFNELMNQQA                | 416 | 16 | 3  | 23.69  | b3b4y6                                             | 1796.82 | 82.270  | 1586   | 3 | 599.61  | -13.25 |
| P66932 TIG_SALTY Trigger factor;             | 17 | Oxidation+M(6)        | GLIEEMASAYEDPKEVIEFYSK          | 368 | 22 | 3  | 13.43  | b6b10y8                                            | 2564.25 | 81.812  | 4360   | 2 | 1282.63 | 14.47  |
| P0A9Y9 CC_SALTY Cold shock-like protein cC;  | 1  |                       | GFGFITPADGSK                    | 15  | 12 | 21 | 155.41 | b2b3b4b5b6°b6y2°y2y3°y3y4°y4y5y6°y6y7°y7y8y9y10y12 | 1196.59 | 64.256  | 259247 | 2 | 598.80  | -6.32  |
| P0A9Y9 CC_SALTY Cold shock-like protein cC;  | 2  |                       | GFGFITPADGSKDVFVHFSAIQGN GFK    | 15  | 27 | 9  | 34.97  | b6b17b22y2y4y11y13y22y27                           | 2843.38 | 87.435  | 58363  | 4 | 711.60  | -12.11 |
| P0A9Y9 CC_SALTY Cold shock-like protein cC;  | 3  |                       | DVFVHFSAIQGN GFK                | 27  | 15 | 4  | 29.43  | b4b11b12y10                                        | 1665.82 | 73.481  | 40830  | 3 | 555.95  | -9.53  |
| P0A9Y9 CC_SALTY Cold shock-like protein cC;  | 4  |                       | GPAAVNVTAI                      | 59  | 10 | 3  | 41.67  | b3b6b9                                             | 912.51  | 59.693  | 11274  | 1 | 912.51  | -6.02  |

|                                                                                           |    |                       |                                |     |    |    |       |                          |         |         |       |   |         |        |
|-------------------------------------------------------------------------------------------|----|-----------------------|--------------------------------|-----|----|----|-------|--------------------------|---------|---------|-------|---|---------|--------|
| [P0A9Y9]CC_SALTY Cold shock-like protein cC;                                              | 5  |                       | TLAEGQNVEFEIQDGQK              | 42  | 17 | 4  | 16.31 | b6y4°y4y6                | 1905.92 | 57.643  | 9815  | 3 | 635.98  | -0.64  |
| [P0A9Y9]CC_SALTY Cold shock-like protein cC;                                              | 6  |                       | WFNESKGFGFITPADGSK             | 9   | 18 | 5  | 24.81 | b7b10°b10b13y5           | 1987.95 | 75.836  | 13517 | 3 | 663.32  | -4.05  |
| [Q9L6N1]METE_SALTY 5-methyltetrahydropteroyltriglutamate--homocysteine methyltransferase; | 1  | Carbamidomethyl+C(7)  | LWVNPDCGLK                     | 719 | 10 | 10 | 58.11 | b2b9°b9y4y67°y7y8y10*y10 | 1201.60 | 60.538  | 36315 | 2 | 601.30  | -2.03  |
| [Q9L6N1]METE_SALTY 5-methyltetrahydropteroyltriglutamate--homocysteine methyltransferase; | 2  |                       | LAAITAQDSQRENPYEVR             | 395 | 18 | 8  | 36.54 | b2b3b4y2y14*y14y15y18    | 2061.02 | 47.409  | 35576 | 3 | 687.68  | -5.33  |
| [Q9L6N1]METE_SALTY 5-methyltetrahydropteroyltriglutamate--homocysteine methyltransferase; | 3  |                       | QAGIDLLPVGDFAWYDHVLTTSLLGNVPAR | 52  | 31 | 9  | 35.2  | b6°b6°*b6b7°b7y6y7y24y31 | 3351.79 | 119.136 | 27939 | 3 | 1117.93 | 3.79   |
| [Q9L6N1]METE_SALTY 5-methyltetrahydropteroyltriglutamate--homocysteine methyltransferase; | 4  |                       | WFNTNYHYIVPEFSK                | 117 | 15 | 5  | 29.43 | b9y9y11y12°y12           | 1944.91 | 78.180  | 15996 | 3 | 648.98  | -8.85  |
| [Q9L6N1]METE_SALTY 5-methyltetrahydropteroyltriglutamate--homocysteine methyltransferase; | 5  |                       | AQESYWAGNTTR                   | 21  | 12 | 7  | 64.15 | y6y7y8y9y10*y10y12       | 1383.63 | 40.819  | 11709 | 2 | 692.32  | 2.29   |
| [Q9L6N1]METE_SALTY 5-methyltetrahydropteroyltriglutamate--homocysteine methyltransferase; | 6  |                       | APTGEPA AAAEMTK                | 103 | 14 | 9  | 39.81 | b1b2b7b9°b9b12y9y12°y12  | 1344.65 | 39.199  | 10319 | 2 | 672.83  | 0.00   |
| [Q9L6N1]METE_SALTY 5-methyltetrahydropteroyltriglutamate--homocysteine methyltransferase; | 7  |                       | LPVDWLLSAGLINGR                | 279 | 15 | 6  | 24.15 | b2b4b5°b5y3*y3           | 1623.93 | 101.280 | 9146  | 2 | 812.47  | 2.26   |
| [Q9L6N1]METE_SALTY 5-methyltetrahydropteroyltriglutamate--homocysteine methyltransferase; | 8  |                       | LAAITAQDSQR                    | 395 | 11 | 6  | 36.06 | b2y5y6y7°y7y11           | 1173.62 | 34.085  | 7911  | 2 | 587.31  | -1.66  |
| [Q9L6N1]METE_SALTY 5-methyltetrahydropteroyltriglutamate--homocysteine methyltransferase; | 9  | Carbamidomethyl+C(11) | GMLTGPVTILCWSFPREDVTR          | 549 | 21 | 4  | 21.69 | b5b12b14y10              | 2435.23 | 92.501  | 2675  | 3 | 812.41  | 2.01   |
| [Q9L6N1]METE_SALTY 5-methyltetrahydropteroyltriglutamate--homocysteine methyltransferase; | 10 | Carbamidomethyl+C(11) | GMLTGPVTILCWSFPR               | 549 | 16 | 3  | 17.15 | b5y5y13                  | 1834.94 | 99.308  | 24986 | 2 | 917.97  | 3.06   |
| [Q9L6N1]METE_SALTY 5-methyltetrahydropteroyltriglutamate--homocysteine methyltransferase; | 11 |                       | LTWTQLLEEVDEALALGHK            | 137 | 19 | 5  | 20.69 | b4b11*b11y11y13          | 2166.12 | 118.952 | 17709 | 3 | 722.71  | -10.37 |
| [Q9L6N1]METE_SALTY 5-methyltetrahydropteroyltriglutamate--homocysteine methyltransferase; | 12 |                       | AALANMVK                       | 737 | 8  | 3  | 40.86 | y4y5y6                   | 817.44  | 43.628  | 15686 | 2 | 409.23  | -20.23 |
| [Q9L6N1]METE_SALTY 5-methyltetrahydropteroyltriglutamate--homocysteine methyltransferase; | 13 |                       | DALNSGETAALEEWSAPIQAR          | 360 | 21 | 5  | 30.8  | b3b5b11*b11b18           | 2229.03 | 96.111  | 5074  | 3 | 743.68  | -20.70 |
| [Q9L6N1]METE_SALTY 5-methyltetrahydropteroyltriglutamate--homocysteine methyltransferase; | 14 |                       | GWPETR                         | 731 | 6  | 1  | 13.62 | b5                       | 745.37  | 41.731  | 3146  | 1 | 745.37  | 13.18  |
| [Q9L6N1]METE_SALTY 5-methyltetrahydropteroyltriglutamate--homocysteine methyltransferase; | 15 | Carbamidomethyl+C(8)  | ALWVASSCSLLHSPIDLSVETR         | 315 | 22 | 4  | 18.16 | b7b12y5y7                | 2441.23 | 97.587  | 2894  | 3 | 814.41  | -9.30  |
| [Q9L6N1]METE_SALTY 5-methyltetrahydropteroyltriglutamate--homocysteine methyltransferase; | 16 |                       | GQQFR                          | 132 | 5  | 1  | 13.22 | b3                       | 635.32  | 41.912  | 2856  | 1 | 635.32  | -4.03  |
| [Q9L6N1]METE_SALTY 5-methyltetrahydropteroyltriglutamate--homocysteine methyltransferase; | 17 |                       | GEPFDR                         | 174 | 6  | 2  | 26.84 | y3y4                     | 720.33  | 55.984  | 1644  | 1 | 720.33  | 0.85   |
| [Q9L6N1]METE_SALTY 5-methyltetrahydropteroyltriglutamate--homocysteine methyltransferase; | 18 |                       | RSDWDAYLEWGVAEFR               | 610 | 16 | 4  | 17.15 | b3b12y4°y4               | 1999.95 | 101.599 | 59688 | 3 | 667.32  | 12.33  |

|                                                                                          |    |                                          |                                 |     |    |    |       |                                          |         |         |       |   |         |        |
|------------------------------------------------------------------------------------------|----|------------------------------------------|---------------------------------|-----|----|----|-------|------------------------------------------|---------|---------|-------|---|---------|--------|
| Q9L6N1 METE_SALTY 5-methyltetrahydropteroyltriglutamate--homocysteine methyltransferase; | 19 |                                          | FKLPAWPTTTIGSFQTTTEIR           | 420 | 21 | 4  | 30.01 | y6y7y10y12                               | 2391.28 | 87.944  | 41622 | 3 | 797.76  | 1.94   |
| Q9L6N1 METE_SALTY 5-methyltetrahydropteroyltriglutamate--homocysteine methyltransferase; | 20 |                                          | KAQESYWAGNTTR                   | 20  | 13 | 3  | 20.63 | b8b12y5                                  | 1511.70 | 76.144  | 6363  | 3 | 504.57  | -14.62 |
| Q9L6N1 METE_SALTY 5-methyltetrahydropteroyltriglutamate--homocysteine methyltransferase; | 21 |                                          | WFNTNYHYIVPEFSKGQQFR            | 117 | 20 | 4  | 23.79 | b3b4b11°b11                              | 2561.22 | 79.156  | 2475  | 3 | 854.41  | -6.01  |
| Q9L6N1 METE_SALTY 5-methyltetrahydropteroyltriglutamate--homocysteine methyltransferase; | 22 |                                          | LAAITAQDSQRENPYEV               | 395 | 18 | 5  | 15.58 | b5b13°b13y5°y5                           | 2061.01 | 63.302  | 2474  | 2 | 1031.01 | -12.32 |
| Q9L6N1 METE_SALTY 5-methyltetrahydropteroyltriglutamate--homocysteine methyltransferase; | 23 |                                          | AAQRIPAQR                       | 710 | 9  | 3  | 30.48 | b3b5y4                                   | 1010.57 | 18.652  | 2117  | 2 | 505.79  | -12.38 |
| Q9L6N1 METE_SALTY 5-methyltetrahydropteroyltriglutamate--homocysteine methyltransferase; | 24 | Carbamidomethyl+C(11)<br>;Oxidation+M(2) | GMLTGPVTILCWSFPR                | 549 | 16 | 6  | 34.76 | b3b6b11y7°y7y10                          | 1850.93 | 90.686  | 2756  | 2 | 925.97  | 2.97   |
| Q9L6N1 METE_SALTY 5-methyltetrahydropteroyltriglutamate--homocysteine methyltransferase; | 25 | Carbamidomethyl+C(11)<br>;Oxidation+M(2) | GMLTGPVTILCWSFPREDVTR           | 549 | 21 | 4  | 21.69 | b5y6y13y20                               | 2451.25 | 97.431  | 2387  | 3 | 817.76  | 14.14  |
| P0A1A5 ILVE_SALTY Branched-chain-amino-acid aminotransferase;                            | 1  |                                          | AAPNTIPTAAK                     | 149 | 11 | 7  | 81.73 | y3y4y5y6y7y8y11                          | 1054.58 | 32.162  | 21580 | 2 | 527.79  | -6.60  |
| P0A1A5 ILVE_SALTY Branched-chain-amino-acid aminotransferase;                            | 2  |                                          | SVDGIQVGEGR                     | 266 | 11 | 5  | 36.06 | b1y4y6y9y11                              | 1116.56 | 41.315  | 15855 | 2 | 558.79  | 0.00   |
| P0A1A5 ILVE_SALTY Branched-chain-amino-acid aminotransferase;                            | 3  |                                          | AGGNYLSLLVGSEARR                | 160 | 17 | 7  | 26.14 | b5b7*b7b14y1y15y17                       | 1749.90 | 72.896  | 15733 | 3 | 583.97  | -12.42 |
| P0A1A5 ILVE_SALTY Branched-chain-amino-acid aminotransferase;                            | 4  |                                          | ESLYLADEVFMSGTAAEITPVR          | 244 | 22 | 6  | 25.59 | b3b15y13°y13y15y21                       | 2399.16 | 117.945 | 3770  | 4 | 600.54  | -9.87  |
| P0A1A5 ILVE_SALTY Branched-chain-amino-acid aminotransferase;                            | 5  |                                          | WGWLDPVNS                       | 300 | 9  | 5  | 30.48 | b3b8y6°y6y9                              | 1073.52 | 89.625  | 3399  | 1 | 1073.52 | 13.76  |
| P0A1A5 ILVE_SALTY Branched-chain-amino-acid aminotransferase;                            | 6  |                                          | AGGNYLSLLVGSEAR                 | 160 | 16 | 5  | 24.86 | y3y5°y5y15*y15                           | 1593.80 | 69.059  | 3336  | 3 | 531.94  | -14.02 |
| P0A1A5 ILVE_SALTY Branched-chain-amino-acid aminotransferase;                            | 7  | Carbamidomethyl+C(14)                    | FPVSQSIDELMEACRDVIR             | 69  | 19 | 5  | 22.71 | b9y8y9°y9y19                             | 2265.11 | 70.518  | 1978  | 2 | 1133.06 | 4.74   |
| P0A1A5 ILVE_SALTY Branched-chain-amino-acid aminotransferase;                            | 8  |                                          | ELGIEVR                         | 231 | 7  | 3  | 40.46 | b3b5y4                                   | 815.45  | 35.420  | 2310  | 2 | 408.23  | -17.89 |
| P0A1A5 ILVE_SALTY Branched-chain-amino-acid aminotransferase;                            | 9  | Carbamidomethyl+C(12)                    | SVDGIQVGEGRGCPVTK               | 266 | 17 | 5  | 22.92 | b4b8*b8y12y16                            | 1758.88 | 103.055 | 3017  | 2 | 879.94  | -1.32  |
| P0A1A5 ILVE_SALTY Branched-chain-amino-acid aminotransferase;                            | 10 |                                          | ADYIWFNGEMVRWEDAK               | 5   | 17 | 3  | 16.31 | b12y8y12                                 | 2129.96 | 101.071 | 2799  | 4 | 533.25  | -7.45  |
| P0A7K0 RL11_SALTY 50S ribosomal protein L11;                                             | 1  |                                          | AQLQEIAQTK                      | 103 | 10 | 10 | 58.11 | b2*b2b3y2y5y6°y6y7y8y10                  | 1129.61 | 38.957  | 76340 | 2 | 565.31  | -8.21  |
| P0A7K0 RL11_SALTY 50S ribosomal protein L11;                                             | 2  |                                          | AADMTGADIEAMTR                  | 113 | 14 | 8  | 48.42 | b3y1y4y5y7y8°y8y14                       | 1452.65 | 57.337  | 57897 | 2 | 726.83  | 1.68   |
| P0A7K0 RL11_SALTY 50S ribosomal protein L11;                                             | 3  |                                          | TPPAAVLLK                       | 72  | 9  | 3  | 30.48 | b5y5y7                                   | 909.57  | 54.299  | 40804 | 2 | 455.29  | -12.62 |
| P0A7K0 RL11_SALTY 50S ribosomal protein L11;                                             | 4  |                                          | SGSGKPNKDK                      | 87  | 10 | 3  | 26.9  | b6b9y3                                   | 1017.53 | 33.131  | 5836  | 2 | 509.27  | -1.92  |
| P14845 CARA_SALTY Carbamoyl-phosphate synthase small chain;                              | 1  | Carbamidomethyl+C(12)                    | FLETDIPLFGICLGHQLLALASGAK       | 257 | 25 | 16 | 72.85 | b2b3°b3b5b6°b6y2y3y5°y5y8y14y19y20y23y25 | 2684.45 | 127.591 | 44934 | 3 | 895.49  | -0.36  |
| P14845 CARA_SALTY Carbamoyl-phosphate synthase small chain;                              | 2  |                                          | LTVVPAQTSAEVVK                  | 215 | 15 | 6  | 18.13 | b12b14*b14y1y11°y11                      | 1584.89 | 63.291  | 11291 | 2 | 792.95  | 3.47   |
| P14845 CARA_SALTY Carbamoyl-phosphate synthase small chain;                              | 3  | Carbamidomethyl+C(6)                     | GAQNGCIIAGDSPDAK                | 125 | 16 | 3  | 24.86 | y3y5y12                                  | 1573.75 | 62.156  | 3011  | 2 | 787.38  | 11.32  |
| P14845 CARA_SALTY Carbamoyl-phosphate synthase small chain;                              | 4  | Carbamidomethyl+C(18)                    | MNPDGIFLSNGPGDPAPCDYAITA<br>IQK | 230 | 27 | 5  | 22.75 | b2y9y11y12*y12                           | 2862.36 | 121.341 | 2231  | 3 | 954.79  | 6.14   |



|                                                           |    |                      |                                  |     |    |    |       |                               |         |         |       |   |         |        |
|-----------------------------------------------------------|----|----------------------|----------------------------------|-----|----|----|-------|-------------------------------|---------|---------|-------|---|---------|--------|
| P14845 CARA_SALTY Carbamoyl-phohate synthase small chain; | 5  |                      | QIVTLTYPHIGNVGTNK                | 50  | 17 | 3  | 23.3  | b3y8y9                        | 1854.97 | 53.108  | 38904 | 3 | 618.99  | -20.99 |
| P14845 CARA_SALTY Carbamoyl-phohate synthase small chain; | 6  |                      | SALLVLEDGTQFHGR                  | 3   | 15 | 3  | 26.21 | y5y7y12                       | 1642.86 | 124.884 | 3668  | 2 | 821.93  | 1.41   |
| P14845 CARA_SALTY Carbamoyl-phohate synthase small chain; | 7  |                      | AIGATGSAVGEVVFNTSMTGYQEILTDPSYSR | 18  | 32 | 4  | 24.52 | b12b16y6y7                    | 3321.61 | 102.603 | 3478  | 5 | 665.13  | 5.59   |
| P14845 CARA_SALTY Carbamoyl-phohate synthase small chain; | 8  |                      | SEDDLPHFHVYAYDFGAK               | 185 | 17 | 3  | 23.3  | b8b9y3                        | 1909.90 | 29.823  | 2185  | 3 | 637.31  | 2.49   |
| P14845 CARA_SALTY Carbamoyl-phohate synthase small chain; | 9  |                      | AFPGLNGMDLAK                     | 148 | 12 | 3  | 22.27 | b4y7y10                       | 1233.64 | 37.335  | 2163  | 2 | 617.32  | 4.95   |
| P14845 CARA_SALTY Carbamoyl-phohate synthase small chain; | 10 |                      | NTEDLSSYLK                       | 93  | 10 | 3  | 28.66 | b3y4y5                        | 1169.55 | 28.855  | 1614  | 3 | 390.52  | -19.83 |
| P14845 CARA_SALTY Carbamoyl-phohate synthase small chain; | 11 |                      | EVTTAETRYRWTQGSWTLK              | 160 | 18 | 6  | 41.97 | b3b6b8y10y11y13               | 2157.08 | 82.364  | 25232 | 2 | 1079.04 | 9.39   |
| P14845 CARA_SALTY Carbamoyl-phohate synthase small chain; | 12 | Carbamidomethyl+C(7) | MLVDRGCR                         | 207 | 8  | 3  | 36.09 | b5b7y3                        | 1006.48 | 27.047  | 8394  | 2 | 503.75  | -8.19  |
| P14845 CARA_SALTY Carbamoyl-phohate synthase small chain; | 13 | Phosphoryl.STY(2)    | LTVVPAQTSAAEVLK                  | 215 | 15 | 3  | 18.13 | b3b14y12                      | 1664.84 | 124.858 | 3035  | 2 | 832.92  | 0.15   |
| P66491 RS19_SALTY 30S ribosomal protein S19;              | 1  |                      | QHVPVFVSDEMVGHK                  | 55  | 15 | 5  | 36.7  | b5b9b11b12y15                 | 1708.86 | 62.235  | 42121 | 2 | 854.93  | 4.43   |
| P66491 RS19_SALTY 30S ribosomal protein S19;              | 2  |                      | LGEFAPTR                         | 70  | 8  | 7  | 54.08 | b2y1y3y4y5y7y8                | 890.46  | 41.984  | 37474 | 2 | 445.74  | -9.12  |
| Q8ZPD6 YNCE_SALTY Uncharacterized protein yncE;           | 1  |                      | TFDTPPTYNSLALSADGK               | 308 | 18 | 8  | 41.97 | b3b4b7y2y5y11y14y18           | 1897.93 | 65.513  | 28962 | 2 | 949.47  | 5.40   |
| Q8ZPD6 YNCE_SALTY Uncharacterized protein yncE;           | 2  |                      | EQEATQPDDVIR                     | 338 | 12 | 8  | 64.15 | b1y2y3y6y8y9y10y12            | 1400.67 | 39.421  | 20838 | 2 | 700.84  | -0.09  |
| Q8ZPD6 YNCE_SALTY Uncharacterized protein yncE;           | 3  |                      | QAGQVSVIDAK                      | 291 | 11 | 6  | 31.29 | y1y2y3y4y9y11                 | 1115.60 | 37.605  | 18700 | 2 | 558.30  | -4.49  |
| Q8ZPD6 YNCE_SALTY Uncharacterized protein yncE;           | 4  |                      | EHFFINLSLDTAGHR                  | 229 | 15 | 5  | 29.43 | b11*b11y5y6y13                | 1756.91 | 95.556  | 8417  | 2 | 878.96  | 17.72  |
| Q8ZPD6 YNCE_SALTY Uncharacterized protein yncE;           | 5  |                      | TGDVK                            | 119 | 5  | 1  | 13.22 | b3                            | 519.27  | 64.980  | 3978  | 1 | 519.27  | -12.46 |
| Q8ZPD6 YNCE_SALTY Uncharacterized protein yncE;           | 6  |                      | LYTTNADGEFTIDTASNK               | 198 | 19 | 3  | 14.93 | b10y9y14                      | 2074.02 | 103.706 | 2782  | 3 | 692.01  | 12.83  |
| Q8ZPD6 YNCE_SALTY Uncharacterized protein yncE;           | 7  |                      | ELVADAATNTIYISGVGK               | 144 | 18 | 9  | 75.53 | b9b10*b10b11b12b13*b13b14*b14 | 1821.93 | 124.205 | 1995  | 2 | 911.47  | -18.16 |
| Q8ZPD6 YNCE_SALTY Uncharacterized protein yncE;           | 8  |                      | GSLLLGSLLVASSFSTLAAEDMLR         | 12  | 24 | 5  | 36.4  | y7y9y11y13y14                 | 2451.34 | 84.598  | 1670  | 3 | 817.79  | 11.35  |
| Q8ZPD6 YNCE_SALTY Uncharacterized protein yncE;           | 9  |                      | NEAYVTHRQAGQVSVIDAK              | 283 | 19 | 4  | 23.65 | b5b11b14y12                   | 2086.07 | 64.350  | 8731  | 3 | 696.03  | -0.35  |
| Q8ZPD6 YNCE_SALTY Uncharacterized protein yncE;           | 10 |                      | STREQEATQPDDVIR                  | 335 | 15 | 4  | 29.43 | b6b10b13y10                   | 1744.84 | 94.685  | 3399  | 2 | 872.93  | -1.33  |
| Q8ZPD6 YNCE_SALTY Uncharacterized protein yncE;           | 11 |                      | TTIENTGKMSTGLALDSK               | 177 | 18 | 3  | 15.58 | b6b10y13                      | 1866.95 | 61.549  | 3145  | 2 | 933.98  | -0.59  |
| Q8ZPD6 YNCE_SALTY Uncharacterized protein yncE;           | 12 |                      | AQRLYTTNADGEFITIDTASNK           | 195 | 22 | 8  | 51.94 | b10y3*y3y4y5y8y9*y9           | 2429.18 | 136.275 | 1821  | 2 | 1215.09 | -5.23  |
| Q8ZPD6 YNCE_SALTY Uncharacterized protein yncE;           | 13 |                      | LLDDGKEHFFINLSLDTAGHR            | 223 | 21 | 3  | 13.87 | b3b6y6                        | 2398.23 | 75.188  | 1524  | 2 | 1199.62 | 6.92   |
| P58661 AAT_SALTY Aartate aminotransferase;                | 1  |                      | VWVSNPSWPNHK                     | 122 | 12 | 4  | 26.25 | b7*b7b8y4                     | 1450.70 | 53.651  | 12578 | 3 | 484.24  | -13.04 |
| P58661 AAT_SALTY Aartate aminotransferase;                | 2  |                      | FENITAAPADPILGLADLFR             | 1   | 20 | 8  | 40.95 | b6b8*b8b11*b11b15*b15b16      | 2144.16 | 99.872  | 7821  | 3 | 715.39  | 11.39  |
| P58661 AAT_SALTY Aartate aminotransferase;                | 3  |                      | MFENITAAPADPILGLADLFR            | 0   | 21 | 11 | 44.05 | b8*b8b11b14*b14y1y3y4y7y13y21 | 2275.15 | 120.336 | 7447  | 3 | 759.05  | -14.59 |
| P58661 AAT_SALTY Aartate aminotransferase;                | 4  | Carbamidomethyl+C(4) | VGACTLVAADAETVDR                 | 254 | 16 | 6  | 34.76 | b11b14y7y10y12y16             | 1647.79 | 70.304  | 4767  | 3 | 549.94  | -6.07  |
| P58661 AAT_SALTY Aartate aminotransferase;                | 5  |                      | TAQTPGGTGALR                     | 96  | 12 | 4  | 26.25 | b4*b4y7y8                     | 1129.59 | 29.546  | 7259  | 2 | 565.30  | -2.70  |

|                                                    |    |                       |                                    |     |    |    |        |                                      |         |         |        |   |         |        |
|----------------------------------------------------|----|-----------------------|------------------------------------|-----|----|----|--------|--------------------------------------|---------|---------|--------|---|---------|--------|
| P58661 AAT_SALTY Aartate aminotransferase;         | 6  |                       | NYLGIDGIPEFAR                      | 63  | 13 | 7  | 45.52  | b3*b3b4b9*b9b12y8                    | 1464.78 | 89.656  | 4217   | 2 | 732.89  | 22.08  |
| P58661 AAT_SALTY Aartate aminotransferase;         | 7  |                       | AFSQMK                             | 270 | 6  | 2  | 13.62  | y5°y5                                | 711.35  | 108.418 | 3047   | 1 | 711.35  | 0.77   |
| P58661 AAT_SALTY Aartate aminotransferase;         | 8  |                       | GWLPLFD FayQG FAR                  | 204 | 15 | 5  | 37.09  | b11b12b14y11y13                      | 1787.87 | 136.745 | 2980   | 1 | 1787.87 | -9.08  |
| P58661 AAT_SALTY Aartate aminotransferase;         | 9  |                       | EEFGVYAVASGR                       | 362 | 12 | 3  | 26.25  | b3b4y11                              | 1284.62 | 75.936  | 2945   | 2 | 642.81  | -1.71  |
| P58661 AAT_SALTY Aartate aminotransferase;         | 10 |                       | NFGLYNER                           | 246 | 8  | 7  | 54.08  | b4*b4b7°b7y5*y5y7                    | 1012.48 | 101.711 | 1996   | 1 | 1012.48 | -1.45  |
| P58661 AAT_SALTY Aartate aminotransferase;         | 11 |                       | FENTAAPADPILGLADLFRADDRP GK        | 1   | 27 | 4  | 11.9   | b4°b4y6y8                            | 2883.46 | 63.197  | 10544  | 5 | 577.50  | -13.63 |
| P58661 AAT_SALTY Aartate aminotransferase;         | 12 | Carbamidomethyl+C(12) | NFGLYNERVGACTLVAADAETVD R          | 246 | 24 | 4  | 12.7   | b9°b9b13y11                          | 2641.29 | 75.885  | 4156   | 3 | 881.10  | 6.75   |
| P58661 AAT_SALTY Aartate aminotransferase;         | 13 |                       | DFSFIKQNGMFSFSGLTK                 | 336 | 19 | 3  | 14.93  | b6b12y12                             | 2167.07 | 66.126  | 3212   | 3 | 723.03  | -8.00  |
| P58661 AAT_SALTY Aartate aminotransferase;         | 14 | Carbamidomethyl+C(4)  | VGACTLVAADAETVDRAFSQMK             | 254 | 22 | 4  | 24.22  | b3b4b19y4                            | 2340.10 | 67.944  | 3030   | 3 | 780.71  | -13.04 |
| P58661 AAT_SALTY Aartate aminotransferase;         | 15 |                       | ELIVASSYSKNFGLYNER                 | 236 | 18 | 4  | 22.98  | b13*b13y8y9                          | 2090.03 | 110.354 | 1538   | 3 | 697.35  | -13.43 |
| P53636 SODC1_SALTY Superoxide dismutase [Cu-Zn] 1; | 1  | Carbamidomethyl+C(3)  | FACGVIEK                           | 169 | 8  | 8  | 67.3   | y2°y2y3y4y5y6y7y8                    | 923.46  | 41.061  | 160980 | 2 | 462.23  | -10.18 |
| P53636 SODC1_SALTY Superoxide dismutase [Cu-Zn] 1; | 2  |                       | GGDNYSDKPAPLGGGGAR                 | 151 | 18 | 13 | 101.31 | b2b10*b10y5y6y7y8y10y11y12y13°y13y18 | 1688.78 | 33.269  | 81334  | 3 | 563.60  | -13.52 |
| P53636 SODC1_SALTY Superoxide dismutase [Cu-Zn] 1; | 3  |                       | EVPALMAGGHLDPEK                    | 84  | 15 | 4  | 18.13  | b2b3b10y14                           | 1563.78 | 57.311  | 18873  | 3 | 521.93  | -2.73  |
| P53636 SODC1_SALTY Superoxide dismutase [Cu-Zn] 1; | 4  |                       | GHSLMIHK                           | 143 | 8  | 4  | 40.86  | b3°b3b4b6                            | 922.49  | 12.592  | 1808   | 2 | 461.75  | -4.37  |
| P53636 SODC1_SALTY Superoxide dismutase [Cu-Zn] 1; | 5  |                       | HLGPYNDKGHLGDLPLGVVNAD GTATYPLLAPR | 102 | 33 | 3  | 11.05  | b11y3y20                             | 3441.76 | 82.534  | 12703  | 4 | 861.20  | -7.66  |
| P53636 SODC1_SALTY Superoxide dismutase [Cu-Zn] 1; | 6  |                       | DGKEVPALMAGGHLDPEK                 | 81  | 18 | 5  | 30.97  | b6b11b16y7y14                        | 1863.92 | 83.354  | 3591   | 2 | 932.47  | -2.16  |
| P67904 RS10_SALTY 30S ribosomal protein S10;       | 1  |                       | LIDQSTAEIVETAK                     | 16  | 14 | 13 | 80.93  | b2b3b7b9b14y2y3y4y5y9°y9y10y14       | 1517.81 | 55.436  | 64198  | 2 | 759.41  | 0.64   |
| P67904 RS10_SALTY 30S ribosomal protein S10;       | 2  |                       | LVDIVEPTEK                         | 72  | 10 | 8  | 47.9   | b2b3y2y4y6°y6y8y10                   | 1142.63 | 51.744  | 41730  | 2 | 571.82  | -4.59  |
| P67904 RS10_SALTY 30S ribosomal protein S10;       | 3  |                       | FTVLISPHVNKDAR                     | 48  | 14 | 3  | 27.85  | y5y7y9                               | 1596.88 | 54.636  | 4450   | 2 | 798.94  | -6.04  |
| P67904 RS10_SALTY 30S ribosomal protein S10;       | 4  |                       | DQYEIR                             | 62  | 6  | 1  | 13.62  | y4                                   | 823.39  | 32.229  | 20433  | 2 | 412.20  | -1.33  |
| P67904 RS10_SALTY 30S ribosomal protein S10;       | 5  |                       | AFDHRLIDQSTAEIVETAK                | 11  | 19 | 4  | 14.93  | b5b9y12*y12                          | 2144.08 | 111.056 | 1505   | 3 | 715.37  | -7.29  |
| P67904 RS10_SALTY 30S ribosomal protein S10;       | 6  |                       | SPHVNKDAR                          | 53  | 9  | 0  | 3.64   |                                      | 1023.52 | 54.577  | 3035   | 2 | 512.26  | -14.49 |
| P60446 RL3_SALTY 50S ribosomal protein L3;         | 1  |                       | VTVQSLDVVR                         | 169 | 10 | 8  | 68.11  | b2°b2y3y5y6y7y8y10                   | 1115.64 | 56.481  | 69377  | 2 | 558.32  | -5.91  |
| P60446 RL3_SALTY 50S ribosomal protein L3;         | 2  |                       | IFTEDGVSPVTVIEVEANR                | 13  | 20 | 8  | 51.74  | y2y4°y4y5y6y7y15y20                  | 2188.17 | 87.974  | 38699  | 2 | 1094.59 | 8.59   |
| P60446 RL3_SALTY 50S ribosomal protein L3;         | 3  |                       | MAGQMGNER                          | 160 | 9  | 10 | 59.92  | b2b3b4y1y2°y2y4y5°y5y8               | 993.44  | 20.449  | 10666  | 2 | 497.22  | 14.50  |
| P60446 RL3_SALTY 50S ribosomal protein L3;         | 4  |                       | LAEGEETYVGQISVELFADVK              | 83  | 22 | 5  | 20.86  | b3y1y4y9y12                          | 2384.18 | 136.301 | 3299   | 2 | 1192.59 | -4.61  |
| P60446 RL3_SALTY 50S ribosomal protein L3;         | 5  |                       | VDVTGTSK                           | 106 | 8  | 4  | 36.09  | b3b7y6°y6                            | 806.44  | 38.417  | 73161  | 2 | 403.72  | 13.25  |
| P60446 RL3_SALTY 50S ribosomal protein L3;         | 6  |                       | TQDATHGNSLSHR                      | 128 | 13 | 5  | 25.41  | b8y7°y7*y7y8                         | 1423.69 | 40.843  | 29676  | 3 | 475.23  | 13.20  |
| P60446 RL3_SALTY 50S ribosomal protein L3;         | 7  |                       | NLLLVK                             | 184 | 6  | 1  | 13.62  | y4                                   | 699.47  | 56.454  | 17679  | 1 | 699.47  | -7.07  |

|                                                    |    |                       |                                     |     |    |   |       |                         |         |         |       |   |         |        |
|----------------------------------------------------|----|-----------------------|-------------------------------------|-----|----|---|-------|-------------------------|---------|---------|-------|---|---------|--------|
| [P60446]RL3_SALTY 50S ribosomal protein L3;        | 8  |                       | VGMTR                               | 8   | 5  | 2 | 26.43 | b3y4                    | 563.30  | 50.265  | 16096 | 1 | 563.30  | -2.28  |
| [P60446]RL3_SALTY 50S ribosomal protein L3;        | 9  |                       | GLWEFR                              | 77  | 6  | 2 | 26.84 | y3y4                    | 807.41  | 69.873  | 12457 | 2 | 404.21  | -9.68  |
| [P60446]RL3_SALTY 50S ribosomal protein L3;        | 10 | Carbamidomethyl+C(9)  | GGVPGATGCDLIVKPAVK                  | 190 | 18 | 4 | 24.81 | b12y4y6y15              | 1738.92 | 53.937  | 11284 | 3 | 580.31  | -17.34 |
| [P60446]RL3_SALTY 50S ribosomal protein L3;        | 11 | Carbamidomethyl+C(9)  | GGVPGATGCDLIVKPAVKA                 | 190 | 19 | 5 | 33.34 | b7y5y6y12y16            | 1809.97 | 56.166  | 61075 | 3 | 603.99  | -11.80 |
| [P60446]RL3_SALTY 50S ribosomal protein L3;        | 12 |                       | WNFRTQDATHGNSLSHR                   | 124 | 17 | 3 | 16.31 | b3b9y7                  | 2026.98 | 74.238  | 6770  | 3 | 676.33  | 10.36  |
| [P60446]RL3_SALTY 50S ribosomal protein L3;        | 13 |                       | LAEGEETYVGQSIGVELFADVKK             | 83  | 23 | 4 | 28.8  | b4b5b11b15              | 2512.25 | 98.344  | 2726  | 3 | 838.09  | -12.63 |
| [P60446]RL3_SALTY 50S ribosomal protein L3;        | 14 |                       | VTQVKDLANDGYR                       | 33  | 13 | 3 | 20.63 | b3b6y7                  | 1478.75 | 71.623  | 2627  | 2 | 739.88  | -5.12  |
| [P60446]RL3_SALTY 50S ribosomal protein L3;        | 15 |                       | DLANDGYRAVQVTTGAK                   | 38  | 17 | 3 | 23.71 | b4b8b14                 | 1778.89 | 76.263  | 1544  | 3 | 593.64  | -6.24  |
| [P60446]RL3_SALTY 50S ribosomal protein L3;        | 16 |                       | IFTEDGVSIPTVIEVEANR                 | 13  | 20 | 0 | 6.07  |                         | 2170.12 | 87.967  | 5177  | 3 | 724.05  | -4.50  |
| [P60726]RL4_SALTY 50S ribosomal protein L4;        | 1  |                       | DAQSALTVSETTFGR                     | 6   | 15 | 4 | 18.13 | b4b6y5°y5               | 1582.77 | 46.124  | 17334 | 3 | 528.26  | 1.00   |
| [P60726]RL4_SALTY 50S ribosomal protein L4;        | 2  |                       | VVMTADAVK                           | 185 | 9  | 4 | 30.48 | b6°b6y3y7               | 933.52  | 45.048  | 13965 | 2 | 467.26  | 11.70  |
| [P60726]RL4_SALTY 50S ribosomal protein L4;        | 3  |                       | DAQSALTVSETTFGRDFNEALVH QVVVAYAAGAR | 6   | 34 | 3 | 10.98 | b9b15y7                 | 3593.79 | 99.515  | 11405 | 4 | 899.20  | -2.24  |
| [P60726]RL4_SALTY 50S ribosomal protein L4;        | 4  |                       | MELVLKDAQSALTVSETTFGR               | 0   | 21 | 5 | 23.52 | y1y4y6y7°y7             | 2296.16 | 120.392 | 3002  | 2 | 1148.58 | -12.33 |
| [P60726]RL4_SALTY 50S ribosomal protein L4;        | 5  |                       | DATGIDPVSLIAFDK                     | 170 | 15 | 4 | 18.13 | b5y5y10°y10             | 1561.81 | 87.907  | 12781 | 2 | 781.41  | -0.31  |
| [P60726]RL4_SALTY 50S ribosomal protein L4;        | 6  |                       | SGGVTFARPQDHSQK                     | 79  | 16 | 8 | 49.74 | b3°b3b6b7b8y6°y6y8      | 1685.82 | 60.415  | 9156  | 3 | 562.61  | -9.49  |
| [P60726]RL4_SALTY 50S ribosomal protein L4;        | 7  |                       | DATGIDPVSLIAFDKVVMTADAV K           | 170 | 24 | 7 | 39.63 | b3b5b8b9y3y7y19         | 2476.30 | 101.731 | 21521 | 3 | 826.10  | -1.18  |
| [P60726]RL4_SALTY 50S ribosomal protein L4;        | 8  |                       | DAQSALTVSETTFGRDFNEALVH QVVVAYAAGAR | 6   | 34 | 3 | 10.98 | b8b12y10                | 3593.81 | 85.266  | 3303  | 3 | 1198.61 | 3.46   |
| [P60726]RL4_SALTY 50S ribosomal protein L4;        | 9  | Phosphoryl STY(9)     | ELVLKDAQSALTVSETTFGR                | 1   | 20 | 5 | 37.73 | y8y9°y9y10y13_H3PO4 y13 | 2245.11 | 80.384  | 1537  | 2 | 1123.06 | 3.59   |
| [P60726]RL4_SALTY 50S ribosomal protein L4;        | 10 | Oxidation+M(4)        | LKDMALEDVLIITGELDENLFLAA R          | 137 | 25 | 3 | 12.4  | b4b6y13                 | 2818.50 | 89.053  | 12144 | 3 | 940.17  | 3.12   |
| [P0A1V6]KPRS_SALTY Ribose-phohate pyrophohokinase; | 1  |                       | LFAGNATPELAQR                       | 5   | 13 | 6 | 28.12 | y6*y6y10°y10y11y13      | 1387.74 | 53.817  | 17230 | 2 | 694.37  | 1.85   |
| [P0A1V6]KPRS_SALTY Ribose-phohate pyrophohokinase; | 2  |                       | ITAVIPYFGYAR                        | 84  | 12 | 4 | 37.25 | b4y5y7y9                | 1370.75 | 80.397  | 15468 | 2 | 685.88  | 1.34   |
| [P0A1V6]KPRS_SALTY Ribose-phohate pyrophohokinase; | 3  | Carbamidomethyl+C(10) | NSVIDEVVVCDTIPTLDEIK                | 262 | 20 | 6 | 30.63 | b2b12b14b15y5y7         | 2259.15 | 88.094  | 6544  | 2 | 1130.08 | 2.16   |
| [P0A1V6]KPRS_SALTY Ribose-phohate pyrophohokinase; | 4  |                       | VVADFLSSVGVDNR                      | 111 | 13 | 3 | 25.41 | b5b6y6                  | 1363.71 | 74.854  | 10200 | 2 | 682.36  | -10.29 |
| [P0A1V6]KPRS_SALTY Ribose-phohate pyrophohokinase; | 5  |                       | ANVSQVMHIIGDVAGR                    | 198 | 16 | 5 | 27.66 | b4b6b9*b9y11            | 1666.85 | 75.275  | 3273  | 2 | 833.93  | -13.18 |
| [P0A1V6]KPRS_SALTY Ribose-phohate pyrophohokinase; | 6  |                       | VFAYATHPIFSGNAANNLR                 | 243 | 19 | 5 | 25.86 | b7y8y13*y13y14          | 2063.02 | 103.541 | 2889  | 3 | 688.35  | -11.12 |
| [P0A1V6]KPRS_SALTY Ribose-phohate pyrophohokinase; | 7  | Carbamidomethyl+C(11) | GGDIFIQSTCAPTNDNLMELVVM VDALR       | 49  | 29 | 3 | 22.71 | b4b5b9                  | 3192.62 | 105.148 | 2791  | 3 | 1064.88 | 14.45  |
| [P0A1V6]KPRS_SALTY Ribose-phohate pyrophohokinase; | 8  |                       | FSDGEVSVQINENVR                     | 34  | 15 | 4 | 29.43 | b5b8b13y7               | 1692.80 | 59.725  | 2095  | 2 | 846.90  | -11.18 |
| [P0A1V6]KPRS_SALTY Ribose-phohate pyrophohokinase; | 9  |                       | RISNEESISAMFEH                      | 301 | 14 | 4 | 27.06 | b7°b7b9b10              | 1649.76 | 47.706  | 10424 | 2 | 825.39  | 3.40   |
| [P0A1V6]KPRS_SALTY Ribose-phohate pyrophohokinase; | 10 |                       | AIAKLLNDTDMAIIDK                    | 178 | 16 | 3 | 17.15 | b11y7y11                | 1744.94 | 66.499  | 4228  | 2 | 872.98  | -4.27  |

|                                                          |    |                                          |                                         |     |    |    |        |                                                  |         |         |        |   |         |        |
|----------------------------------------------------------|----|------------------------------------------|-----------------------------------------|-----|----|----|--------|--------------------------------------------------|---------|---------|--------|---|---------|--------|
| P66541 RS2_SALTY 30S ribosomal protein S2;               | 1  |                                          | TVPMFNEALAE LNK                         | 45  | 14 | 9  | 39.02  | b2b3°b3b7b8°b8y9*y9y12                           | 1576.81 | 84.269  | 67772  | 2 | 788.91  | 2.63   |
| P66541 RS2_SALTY 30S ribosomal protein S2;               | 2  |                                          | DMGGLPDALFVIDADHEHIAIK                  | 152 | 22 | 3  | 19.95  | b5b11b14                                         | 2377.18 | 83.388  | 9922   | 2 | 1189.10 | -0.82  |
| P66541 RS2_SALTY 30S ribosomal protein S2;               | 3  |                                          | SQDLASQAEE SFVEAE                       | 225 | 16 | 5  | 17.15  | b6b9y1y5y16                                      | 1739.78 | 72.985  | 9686   | 2 | 870.39  | 9.12   |
| P66541 RS2_SALTY 30S ribosomal protein S2;               | 4  |                                          | EANNLGIPVFAIVD TNSDPDGVDF<br>VIPGNDDAIR | 174 | 34 | 16 | 65.17  | b6°b6*b6b7°b7°b7b14y5°y<br>5y7y8y12y13y14*y14y16 | 3569.76 | 104.121 | 13824  | 3 | 1190.59 | 6.02   |
| P66541 RS2_SALTY 30S ribosomal protein S2;               | 5  |                                          | YWNPK                                   | 21  | 5  | 1  | 13.22  | b3                                               | 707.35  | 34.055  | 11716  | 2 | 354.18  | -5.26  |
| P66541 RS2_SALTY 30S ribosomal protein S2;               | 6  |                                          | WLGGMLTNWK                              | 95  | 10 | 3  | 26.9   | b3b8y7                                           | 1205.64 | 82.735  | 4603   | 2 | 603.32  | 18.53  |
| P66541 RS2_SALTY 30S ribosomal protein S2;               | 7  |                                          | AGVHFHGQTR                              | 11  | 10 | 5  | 40.12  | b7y5y8y9°y9                                      | 1109.54 | 87.615  | 2469   | 1 | 1109.54 | -17.16 |
| P66541 RS2_SALTY 30S ribosomal protein S2;               | 8  |                                          | TVPMFNEALAE LNKISAR                     | 45  | 18 | 5  | 24.81  | b4°b4b6b10y4                                     | 2004.04 | 95.501  | 18583  | 3 | 668.69  | -7.67  |
| P66541 RS2_SALTY 30S ribosomal protein S2;               | 9  | Phosphoryl STY(4)                        | LENSLGGIK                               | 143 | 9  | 3  | 30.48  | b3y7y8                                           | 1010.48 | 21.428  | 9900   | 2 | 505.75  | 2.30   |
| P66541 RS2_SALTY 30S ribosomal protein S2;               | 10 | Oxidation+M(2)                           | DMGGLPDALFVIDADHEHIAIK                  | 152 | 22 | 4  | 13.43  | b9b14y11°y11                                     | 2393.17 | 71.339  | 170164 | 4 | 599.05  | -5.71  |
| P0A7X0 RS8_SALTY 30S ribosomal protein S8;               | 1  |                                          | SMQDPIADMLTR                            | 1   | 12 | 15 | 100.12 | b1b2b4b12y1y2y3y4y5y6y<br>8y9y10°y10y12          | 1377.65 | 78.069  | 139210 | 2 | 689.33  | -2.48  |
| P0A7X0 RS8_SALTY 30S ribosomal protein S8;               | 2  |                                          | AVVESIQR                                | 69  | 8  | 6  | 40.86  | b2y4y5y6°y6y8                                    | 901.50  | 32.735  | 58448  | 2 | 451.25  | -11.71 |
| P0A7X0 RS8_SALTY 30S ribosomal protein S8;               | 3  |                                          | AAVTMPSSK                               | 22  | 9  | 10 | 67.7   | b2y2y3y4°y4y6y7°y7y8y9                           | 891.46  | 31.372  | 54212  | 2 | 446.23  | 0.14   |
| P55900 SERC_SALTY Phohoserine aminotransferase;          | 1  | Carbamidomethyl+C(7)                     | LAQQELCDWHGLGTSVMEISHR                  | 20  | 22 | 9  | 57.25  | b5b6b7y1y3y6°y6y10y11                            | 2567.19 | 73.903  | 25660  | 4 | 642.55  | -10.65 |
| P55900 SERC_SALTY Phohoserine aminotransferase;          | 2  |                                          | AQVFNFSSGPAMLPAEVLK                     | 1   | 19 | 8  | 20.69  | b2°b2b6°b8b14y6y13y19                            | 2006.06 | 91.189  | 20843  | 2 | 1003.53 | 7.18   |
| P55900 SERC_SALTY Phohoserine aminotransferase;          | 3  |                                          | MNVPFQLADNTLDK                          | 297 | 14 | 3  | 19.28  | b5y7y12                                          | 1605.78 | 57.790  | 49657  | 3 | 535.93  | -6.23  |
| P55900 SERC_SALTY Phohoserine aminotransferase;          | 4  |                                          | ASIYNAMPIEGVK                           | 335 | 13 | 4  | 32.3   | b11y6y9y10                                       | 1392.72 | 64.707  | 20997  | 2 | 696.86  | 0.18   |
| P55900 SERC_SALTY Phohoserine aminotransferase;          | 5  |                                          | YGVIIYAGA QK                            | 188 | 10 | 3  | 41.67  | y5y7y9                                           | 1069.55 | 43.299  | 15174  | 2 | 535.28  | -14.04 |
| P55900 SERC_SALTY Phohoserine aminotransferase;          | 6  |                                          | ITVDGK                                  | 122 | 6  | 1  | 13.62  | b5                                               | 632.36  | 28.295  | 10532  | 1 | 632.36  | -5.50  |
| P55900 SERC_SALTY Phohoserine aminotransferase;          | 7  |                                          | EFIQVAEEAEQDFR                          | 44  | 14 | 4  | 19.28  | b6°b6y9y12                                       | 1710.80 | 72.879  | 3540   | 3 | 570.94  | -0.14  |
| P55900 SERC_SALTY Phohoserine aminotransferase;          | 8  | Carbamidomethyl+C(3)                     | KYCAPQIIDAK                             | 111 | 11 | 5  | 36.72  | b4b7b8°b8y9                                      | 1306.67 | 66.846  | 95868  | 2 | 653.84  | -9.81  |
| P55900 SERC_SALTY Phohoserine aminotransferase;          | 9  |                                          | GKEFIQVAEEAEQDFR                        | 42  | 16 | 3  | 17.15  | b8b13y3                                          | 1895.93 | 52.401  | 11451  | 3 | 632.65  | 7.28   |
| P55900 SERC_SALTY Phohoserine aminotransferase;          | 10 |                                          | ASIYNAMPIEGVKAL TDFMIDFER               | 335 | 24 | 4  | 22.99  | b3°b3b12b13                                      | 2731.35 | 98.466  | 4488   | 4 | 683.59  | 0.27   |
| P55900 SERC_SALTY Phohoserine aminotransferase;          | 11 |                                          | AQGGVAAMHKINQ QK                        | 257 | 15 | 4  | 43.69  | y9y10y12y13                                      | 1580.81 | 136.792 | 2628   | 1 | 1580.81 | -14.90 |
| P55900 SERC_SALTY Phohoserine aminotransferase;          | 12 | Phosphoryl STY(8)                        | MAQVFNFSSGPAMLPAEVLK                    | 0   | 20 | 4  | 14.37  | b4b6°b6y13                                       | 2217.01 | 82.556  | 9738   | 3 | 739.67  | -13.77 |
| P55900 SERC_SALTY Phohoserine aminotransferase;          | 13 | Carbamidomethyl+C(7);<br>Oxidation+M(17) | LAQQELCDWHGLGTSVMEISHR                  | 20  | 22 | 8  | 25.59  | b3°b3b8y7y9°y9y13°y13                            | 2583.21 | 69.018  | 2504   | 3 | 861.74  | 1.98   |
| P55900 SERC_SALTY Phohoserine aminotransferase;          | 14 | Oxidation+M(13)                          | MAQVFNFSSGPAMLPAEVLK                    | 0   | 20 | 3  | 21.16  | b3b7b14                                          | 2153.05 | 102.131 | 1770   | 3 | 718.36  | -10.77 |
| Q8ZRN1 METQ_SALTY D-methionine-binding lipoprotein metQ; | 1  |                                          | IVELEAPQLPR                             | 178 | 11 | 8  | 55.96  | b2b3°b3y5y6y7y8y11                               | 1264.72 | 66.108  | 67288  | 2 | 632.86  | -4.63  |

|                                                          |    |                       |                                |     |    |    |       |                                                           |         |         |        |   |         |        |
|----------------------------------------------------------|----|-----------------------|--------------------------------|-----|----|----|-------|-----------------------------------------------------------|---------|---------|--------|---|---------|--------|
| Q8ZRN1 METQ_SALTY D-methionine-binding lipoprotein metQ; | 2  |                       | DGIFVEDKDSPYVNLIVTREDNKD AENVK | 215 | 29 | 5  | 22.13 | b4y8y9y12y29                                              | 3322.63 | 70.314  | 30130  | 4 | 831.41  | -3.89  |
| Q8ZRN1 METQ_SALTY D-methionine-binding lipoprotein metQ; | 3  |                       | LKDGVGLLPTSLDIVENPK            | 156 | 19 | 6  | 24.11 | y1y2y4y5y7y19                                             | 2008.12 | 79.270  | 19916  | 3 | 670.04  | -6.32  |
| Q8ZRN1 METQ_SALTY D-methionine-binding lipoprotein metQ; | 4  |                       | DGSQVAVPNDPTNLGR               | 128 | 16 | 5  | 17.15 | b3°b3b10y9y16                                             | 1639.81 | 34.441  | 12917  | 3 | 547.27  | 3.35   |
| Q8ZRN1 METQ_SALTY D-methionine-binding lipoprotein metQ; | 5  |                       | FVQAYQSDEVYEAANK               | 245 | 16 | 7  | 65.97 | y3y6y10y11y12y13y16                                       | 1861.88 | 50.856  | 11601  | 2 | 931.45  | 12.52  |
| Q8ZRN1 METQ_SALTY D-methionine-binding lipoprotein metQ; | 6  | Carbamidomethyl+C(17) | TFAAVGALIGSLALAGCGQDEK         | 6   | 22 | 4  | 24.22 | b4b7b8y3                                                  | 2149.07 | 101.064 | 6769   | 2 | 1075.04 | -10.00 |
| Q8ZRN1 METQ_SALTY D-methionine-binding lipoprotein metQ; | 7  |                       | DSPYVNLIVTREDNKDAENVK          | 223 | 21 | 7  | 23.52 | b7b11°b11°b11b12°b12y2<br>1                               | 2419.19 | 62.525  | 3925   | 3 | 807.07  | -7.97  |
| Q8ZRN1 METQ_SALTY D-methionine-binding lipoprotein metQ; | 8  |                       | DGIFVEDK                       | 215 | 8  | 5  | 48.06 | b3b4y3y4°y4                                               | 922.45  | 93.450  | 8749   | 1 | 922.45  | -2.78  |
| Q8ZRN1 METQ_SALTY D-methionine-binding lipoprotein metQ; | 9  |                       | GDIDANAFQHKKPYLDQQIK           | 78  | 19 | 5  | 38.12 | b3b10b11°b11b12                                           | 2201.09 | 89.585  | 8679   | 3 | 734.37  | -3.22  |
| Q8ZRN1 METQ_SALTY D-methionine-binding lipoprotein metQ; | 10 |                       | SLDDAQIALAVINTTYASQIGLTPA<br>K | 189 | 26 | 3  | 12.14 | b3b9y13                                                   | 2674.37 | 100.847 | 3279   | 3 | 892.13  | -20.54 |
| Q8ZRN1 METQ_SALTY D-methionine-binding lipoprotein metQ; | 11 |                       | VFNGGAVKGW                     | 261 | 10 | 4  | 41.09 | b4b6y7y8                                                  | 1034.56 | 30.181  | 215861 | 2 | 517.78  | 13.10  |
| Q8ZRN1 METQ_SALTY D-methionine-binding lipoprotein metQ; | 12 |                       | SLDELKDGSQVAVPNDPTNLGR         | 122 | 22 | 6  | 28.95 | b10b12°b12b13y3y19                                        | 2325.18 | 57.822  | 3608   | 2 | 1163.09 | 5.88   |
| Q8ZRN1 METQ_SALTY D-methionine-binding lipoprotein metQ; | 13 | Phosphoryl STY(13)    | YGLDVELVTFNDYVLPNEALSK         | 56  | 22 | 5  | 18.16 | b5°b5b11y11y13                                            | 2579.22 | 80.090  | 3705   | 3 | 860.41  | -1.14  |
| P02936 OMPA_SALTY Outer membrane protein A;              | 1  | Carbamidomethyl+C(13) | GMGESNPVTGNTCDNVKPR            | 302 | 19 | 18 | 158.7 | b3b4b12y2y5y7y8y9y10y1<br>1°y11y12y13°y13y14y15y1<br>7y19 | 2032.90 | 37.624  | 74537  | 3 | 678.30  | -9.85  |
| P02936 OMPA_SALTY Outer membrane protein A;              | 2  |                       | IGSDAYNQGLSEKR                 | 267 | 14 | 5  | 27.85 | y4y8*y8y13y14                                             | 1537.74 | 34.435  | 21816  | 3 | 513.25  | -14.45 |
| P02936 OMPA_SALTY Outer membrane protein A;              | 3  |                       | LGYPITDDLVDYTR                 | 103 | 14 | 4  | 41.74 | y4y9y10y11                                                | 1640.83 | 75.920  | 11887  | 2 | 820.92  | 5.13   |
| P02936 OMPA_SALTY Outer membrane protein A;              | 4  |                       | FGQQEAAPVVAPAPAPEVQTK          | 194 | 23 | 6  | 20.11 | b2b3y6y10y12y23                                           | 2303.18 | 53.847  | 8803   | 3 | 768.40  | -8.69  |
| P02936 OMPA_SALTY Outer membrane protein A;              | 5  |                       | GDNINGAYK                      | 85  | 9  | 4  | 38.26 | b4b5b7b9                                                  | 951.44  | 26.878  | 7250   | 1 | 951.44  | -14.05 |
| P02936 OMPA_SALTY Outer membrane protein A;              | 6  |                       | IGSDAYNQGLSEK                  | 267 | 13 | 6  | 29.66 | b7b9y7*y7y12y13                                           | 1381.67 | 31.605  | 4934   | 2 | 691.34  | 4.06   |
| P02936 OMPA_SALTY Outer membrane protein A;              | 7  |                       | DGSVVVLGFTDR                   | 255 | 12 | 3  | 32.48 | b4b8b11                                                   | 1264.67 | 49.877  | 4180   | 3 | 422.23  | 11.10  |
| P02936 OMPA_SALTY Outer membrane protein A;              | 8  |                       | SDVLFNFNK                      | 222 | 9  | 3  | 30.48 | b3y5y6                                                    | 1083.53 | 68.580  | 27702  | 2 | 542.27  | -15.55 |
| P02936 OMPA_SALTY Outer membrane protein A;              | 9  |                       | DHDTGVSPVFAGGIEYAITPEIATR      | 138 | 25 | 6  | 25.84 | b14b15°b15y10y13°y13                                      | 2616.25 | 136.825 | 4662   | 2 | 1308.63 | -16.61 |
| P02936 OMPA_SALTY Outer membrane protein A;              | 10 |                       | GIPSDKISAR                     | 292 | 10 | 5  | 54.89 | y3y5y7°y7y8                                               | 1043.57 | 32.061  | 20748  | 2 | 522.29  | -13.33 |
| P02936 OMPA_SALTY Outer membrane protein A;              | 11 |                       | MPYKGDNINGAYK                  | 81  | 13 | 3  | 20.63 | b9y4y7                                                    | 1470.72 | 60.435  | 15931  | 2 | 735.86  | 12.20  |

|                                                 |    |                       |                                                  |     |    |    |       |                               |         |         |       |   |         |        |
|-------------------------------------------------|----|-----------------------|--------------------------------------------------|-----|----|----|-------|-------------------------------|---------|---------|-------|---|---------|--------|
| [P02936]OMPA_SALTY Outer membrane protein A;    | 12 |                       | DGSVVVLGFTDRIGSDAYNQGLS<br>EK                    | 255 | 25 | 3  | 18.62 | b3b9b13                       | 2627.27 | 66.191  | 5687  | 4 | 657.57  | -9.20  |
| [P02936]OMPA_SALTY Outer membrane protein A;    | 13 |                       | AQGVQLTAKLGYPITDDLDVYTR                          | 94  | 23 | 4  | 22.08 | b3b4y5°y5                     | 2537.30 | 124.932 | 4986  | 3 | 846.44  | -10.10 |
| [P02936]OMPA_SALTY Outer membrane protein A;    | 14 |                       | LGYPITDDLDVYTRLGGMVWR                            | 103 | 21 | 4  | 21.69 | b12y4y10y12                   | 2440.20 | 71.243  | 3974  | 3 | 814.07  | -11.61 |
| [Q8ZR01]RLPA_SALTY Rare lipoprotein A;          | 1  |                       | LSQQFSVPGR                                       | 329 | 10 | 10 | 99.98 | b3*b3b7y2y3y5y6y7y8y9         | 1118.59 | 47.635  | 19353 | 2 | 559.80  | -3.27  |
| [Q8ZR01]RLPA_SALTY Rare lipoprotein A;          | 2  |                       | FSQAGLAAIYDAEPGSNLTASGEM<br>FDPMQLTAAHPTLPIPSYAR | 78  | 44 | 10 | 34.39 | b3b5b7b8b10*b10b13y5y7<br>y14 | 4607.21 | 99.756  | 14277 | 4 | 1152.56 | -2.76  |
| [Q8ZR01]RLPA_SALTY Rare lipoprotein A;          | 3  |                       | FVVQVGAVSDQTR                                    | 309 | 13 | 3  | 20.63 | b6b9y7                        | 1405.73 | 64.721  | 2940  | 3 | 469.25  | -9.12  |
| [Q8ZR01]RLPA_SALTY Rare lipoprotein A;          | 4  |                       | QTYALPPRPDLSGMGSSASSAPA<br>QPQGDVLPVSNSTLK       | 191 | 38 | 3  | 22.76 | b13b14y11                     | 3794.98 | 112.966 | 6720  | 4 | 949.50  | 20.39  |
| [Q8ZR01]RLPA_SALTY Rare lipoprotein A;          | 5  |                       | AAADRLNTSNNTK                                    | 152 | 13 | 4  | 20.63 | b4°b4b7y7                     | 1375.70 | 42.657  | 6385  | 3 | 459.24  | 7.63   |
| [Q8ZR01]RLPA_SALTY Rare lipoprotein A;          | 6  |                       | AQQYQQRLSQQFSVPGR                                | 322 | 17 | 3  | 23.3  | b10y5y6                       | 2021.03 | 86.991  | 2239  | 2 | 1011.02 | -1.57  |
| [Q8ZR01]RLPA_SALTY Rare lipoprotein A;          | 7  |                       | AVSDQTR                                          | 315 | 7  | 0  | 3.24  |                               | 776.38  | 64.791  | 1910  | 1 | 776.38  | -14.07 |
| [P0A8B8]YBAB_SALTY UPF0133 protein ybaB;        | 1  |                       | MASVSSGMQLPPGFK                                  | 91  | 15 | 6  | 25.79 | b4b10y11y13°y13y15            | 1536.75 | 66.583  | 32804 | 2 | 768.88  | -2.30  |
| [P0A8B8]YBAB_SALTY UPF0133 protein ybaB;        | 2  | Carbamidomethyl+C(9)  | VTINGAHNCR                                       | 43  | 10 | 3  | 33.89 | y4y6y7                        | 1141.55 | 20.434  | 4764  | 2 | 571.28  | -4.49  |
| [P0A8B8]YBAB_SALTY UPF0133 protein ybaB;        | 3  |                       | VEIDPSLLEDDK                                     | 54  | 12 | 5  | 51.13 | b3b7b9y8y9                    | 1372.67 | 34.108  | 4095  | 3 | 458.23  | -12.09 |
| [P0A8B8]YBAB_SALTY UPF0133 protein ybaB;        | 4  |                       | MQEEIAQLEVTGESGAGLVK                             | 23  | 20 | 5  | 27.88 | b9b15*b15y10y11               | 2089.05 | 118.030 | 2043  | 3 | 697.02  | 0.93   |
| [P0A8B8]YBAB_SALTY UPF0133 protein ybaB;        | 5  |                       | GGLGNLMKQAQQMQEK                                 | 4   | 16 | 7  | 60.22 | b3b5b13b14b15y4y13            | 1760.90 | 72.988  | 11612 | 2 | 880.96  | 14.70  |
| [P0A8B8]YBAB_SALTY UPF0133 protein ybaB;        | 6  |                       | EKMASVSSGMQLPPGFK                                | 89  | 17 | 9  | 52.57 | b5b6b11b15°b15y5y11*y1<br>y13 | 1793.90 | 111.799 | 2849  | 2 | 897.45  | 2.99   |
| [P0A8B8]YBAB_SALTY UPF0133 protein ybaB;        | 7  |                       | MASVSSGMQLPPGFKMPF                               | 91  | 18 | 3  | 15.58 | b12y12y16                     | 1911.91 | 67.598  | 2318  | 2 | 956.46  | -1.79  |
| [P0A8B8]YBAB_SALTY UPF0133 protein ybaB;        | 8  | Carbamidomethyl+C(8)  | TINGAHNCR                                        | 44  | 9  | 2  | 8.25  | b7*b7                         | 1042.47 | 20.414  | 3831  | 2 | 521.74  | -11.94 |
| [P0A8B8]YBAB_SALTY UPF0133 protein ybaB;        | 9  | Carbamidomethyl+C(7)  | INGAHNCR                                         | 45  | 8  | 0  | 2.02  |                               | 941.43  | 20.485  | 3732  | 2 | 471.22  | -5.83  |
| [P05989]ILVC_SALTY Ketol-acid reductoisomerase; | 1  |                       | GFGVPTLIAVHPENDPQGEGMAIA<br>K                    | 167 | 25 | 10 | 40.84 | b2b3b4y1y2y8y10y14y21y<br>25  | 2548.29 | 77.134  | 57241 | 3 | 850.10  | 1.53   |
| [P05989]ILVC_SALTY Ketol-acid reductoisomerase; | 2  |                       | LIQFGWETITEALK                                   | 252 | 14 | 5  | 27.06 | b3b12b13y1y14                 | 1648.88 | 101.284 | 14629 | 2 | 824.94  | -7.85  |
| [P05989]ILVC_SALTY Ketol-acid reductoisomerase; | 3  | Carbamidomethyl+C(6)  | VVIVGCGAQQGLNQLNMR                               | 39  | 18 | 4  | 15.58 | b1b3b13y5                     | 1885.97 | 71.921  | 8737  | 3 | 629.33  | -3.43  |
| [P05989]ILVC_SALTY Ketol-acid reductoisomerase; | 4  |                       | FMGRDEFADGASYLQGK                                | 21  | 17 | 3  | 23.3  | b3b4y9                        | 1891.88 | 50.877  | 5610  | 3 | 631.30  | 7.29   |
| [P05989]ILVC_SALTY Ketol-acid reductoisomerase; | 5  |                       | ANYFNTLNL                                        | 1   | 10 | 3  | 26.9  | b3y4y6                        | 1225.63 | 67.827  | 19387 | 2 | 613.32  | -3.98  |
| [P05989]ILVC_SALTY Ketol-acid reductoisomerase; | 6  |                       | TAFETAPQYEGK                                     | 336 | 12 | 3  | 26.25 | b3b4y5                        | 1341.66 | 27.925  | 3274  | 2 | 671.33  | 20.74  |
| [P05989]ILVC_SALTY Ketol-acid reductoisomerase; | 7  |                       | VGTYEELIPQADLVVNLTDPKQHS<br>DVVR                 | 88  | 28 | 4  | 22.72 | b3°b3b4b7                     | 3135.61 | 81.524  | 25141 | 4 | 784.66  | -6.62  |
| [P05989]ILVC_SALTY Ketol-acid reductoisomerase; | 8  | Carbamidomethyl+C(11) | DITVVMVAPKCPGTEVR                                | 145 | 17 | 6  | 32.74 | b3b14y6y9°y9y11               | 1871.97 | 57.834  | 23425 | 2 | 936.49  | 0.65   |
| [P05989]ILVC_SALTY Ketol-acid reductoisomerase; | 9  |                       | ANYFNTLNLRQQLAQLGK                               | 1   | 18 | 4  | 24.81 | b3b7b10y3                     | 2092.13 | 89.591  | 12125 | 2 | 1046.57 | -0.35  |
| [P05989]ILVC_SALTY Ketol-acid reductoisomerase; | 10 |                       | QGGITLMMDRLSNPAK                                 | 266 | 16 | 4  | 25.53 | b4b5b12*b12                   | 1731.87 | 110.962 | 3206  | 2 | 866.44  | -12.33 |

|                                                       |    |                                         |                                        |     |    |    |       |                                |         |         |       |   |         |        |
|-------------------------------------------------------|----|-----------------------------------------|----------------------------------------|-----|----|----|-------|--------------------------------|---------|---------|-------|---|---------|--------|
| P05989 ILVC_SALTY Ketol-acid reductoisomerase;        | 11 | Phosphoryl STY(6)                       | LVAEGTDPAYAEK                          | 239 | 13 | 4  | 32.3  | b5y4y6y7                       | 1443.65 | 82.416  | 3316  | 3 | 481.89  | 9.98   |
| P05989 ILVC_SALTY Ketol-acid reductoisomerase;        | 12 | Oxidation+M(21)                         | GFGVPTLIAPHENDPQGEGMAIAK               | 167 | 25 | 3  | 12.4  | b5y3y11                        | 2564.27 | 108.037 | 2652  | 3 | 855.43  | -4.67  |
| P67286 YBJQ_SALTY UPF0145 protein ybjQ;               | 1  |                                         | AREIAFQELGEQAK                         | 56  | 14 | 6  | 19.28 | b11*b11y2y7°y7y9               | 1589.82 | 60.396  | 12640 | 2 | 795.41  | -4.22  |
| P67286 YBJQ_SALTY UPF0145 protein ybjQ;               | 2  |                                         | EIAFQELGEQAK                           | 58  | 12 | 11 | 79.12 | b2b3°b3b5b6b9b10b11*b11b12y2   | 1362.69 | 60.398  | 12613 | 2 | 681.85  | 0.00   |
| P63411 ACKA_SALTY Acetate kinase;                     | 1  |                                         | DSASFAPLHNPAHLIGIAEALK                 | 114 | 22 | 5  | 13.43 | b10°b10b13*b13y8               | 2272.22 | 86.252  | 28603 | 3 | 758.08  | 6.98   |
| P63411 ACKA_SALTY Acetate kinase;                     | 2  |                                         | EGTRPAVV IPTNEEL VIAQDASR              | 374 | 23 | 9  | 42.03 | b6b8°b8y5y6y7°y7y14y23         | 2465.30 | 68.887  | 19475 | 3 | 822.44  | -0.20  |
| P63411 ACKA_SALTY Acetate kinase;                     | 3  |                                         | LGVLGFEVDHER                           | 348 | 12 | 5  | 37.25 | b3y3y6y8y12                    | 1370.69 | 67.605  | 18524 | 3 | 457.57  | -13.71 |
| P63411 ACKA_SALTY Acetate kinase;                     | 4  |                                         | QEALGAGAAHSEALNFIVNTILAKPELSAQLTAIGHR  | 52  | 39 | 9  | 36.15 | b14b17°b17b18b19y14*y14y17*y17 | 4011.11 | 136.838 | 8767  | 3 | 1337.71 | -8.95  |
| P63411 ACKA_SALTY Acetate kinase;                     | 5  |                                         | NVAVFDTAFHQTMPEESYLYALPYSLYK           | 144 | 28 | 3  | 17.72 | b3b7b10                        | 3297.61 | 94.305  | 2111  | 4 | 825.16  | 8.14   |
| P63411 ACKA_SALTY Acetate kinase;                     | 6  |                                         | LDVVFTGGIGENAA MVR                     | 324 | 18 | 6  | 38.58 | y9*y9y10*y10y11y16             | 1819.92 | 93.446  | 54331 | 2 | 910.46  | -8.59  |
| P63411 ACKA_SALTY Acetate kinase;                     | 7  | Carbamidomethyl+C(19)                   | FAIIDAVNGDEYLSGLAECFHLPEAR             | 17  | 26 | 5  | 18.28 | b3y4°y4y12y23                  | 2907.40 | 104.240 | 26594 | 3 | 969.81  | 1.93   |
| P63411 ACKA_SALTY Acetate kinase;                     | 8  | Carbamidomethyl+C(1)                    | CVDTSMGLTPLEGLVMGTR                    | 224 | 19 | 8  | 57.94 | b3y4y5y7y10y11y13°y13          | 2037.03 | 94.524  | 21835 | 2 | 1019.02 | 21.45  |
| P63411 ACKA_SALTY Acetate kinase;                     | 9  |                                         | SGDIDPAIIFHLHDTLGMSVDQINKMLTK          | 243 | 29 | 7  | 25.98 | b8b12°b12b13°b13b15y15         | 3209.64 | 94.507  | 27166 | 3 | 1070.55 | 1.83   |
| P63411 ACKA_SALTY Acetate kinase;                     | 10 |                                         | YTSSVVIDESVIQGIKDSASFAPLHNPAHLIGIAEALK | 98  | 38 | 7  | 27.69 | b12y12°y12y15y16y22y32         | 3991.11 | 136.830 | 5532  | 3 | 1331.04 | -1.10  |
| P63411 ACKA_SALTY Acetate kinase;                     | 11 | Carbamidomethyl+C(19)                   | FAIIDAVNGDEYLSGLAECFHLPEARIK           | 17  | 28 | 4  | 17.32 | b12b14b17y10                   | 3148.56 | 96.971  | 3369  | 2 | 1574.78 | -4.96  |
| P63411 ACKA_SALTY Acetate kinase;                     | 12 | Phosphoryl STY(15)                      | SGDIDPAIIFHLHDTLGMSVDQINK              | 243 | 25 | 3  | 22.88 | b11b14b15                      | 2816.36 | 84.148  | 41223 | 3 | 939.46  | 14.13  |
| P63411 ACKA_SALTY Acetate kinase;                     | 13 | Carbamidomethyl+C(18);Phosphoryl STY(3) | MLTKESGLLGLTEVTSDCR                    | 268 | 19 | 9  | 50.02 | b4b12y5y9y12y14°y14y15°y15     | 2190.01 | 86.305  | 36333 | 2 | 1095.51 | -1.23  |
| P63411 ACKA_SALTY Acetate kinase;                     | 14 | Carbamidomethyl+C(18);Oxidation+M(1)    | MLTKESGLLGLTEVTSDCR                    | 268 | 19 | 4  | 20.69 | b4b6y9y13                      | 2126.07 | 126.623 | 1988  | 2 | 1063.54 | 9.42   |
| P63411 ACKA_SALTY Acetate kinase;                     | 15 |                                         | QEALGAGAAHSEALNFI                      | 52  | 18 | 2  | 11.66 | y15°y15                        | 1769.88 | 136.786 | 2952  | 1 | 1769.88 | -0.21  |
| P63411 ACKA_SALTY Acetate kinase;                     | 16 |                                         | DSASFAPLHNPAHLIGIAE                    | 114 | 19 | 1  | 7.79  | y3                             | 1960.00 | 86.216  | 2365  | 3 | 654.00  | 2.43   |
| P22107 TRAT_SALTY TraT complement resistance protein; | 1  |                                         | ATVTTDNVAALR                           | 177 | 12 | 8  | 35.49 | y2y8y9*y9y10*y10y12*y12        | 1231.66 | 45.436  | 58063 | 2 | 616.33  | -2.28  |
| P22107 TRAT_SALTY TraT complement resistance protein; | 2  |                                         | FEEAKPVLEEQLAK                         | 223 | 14 | 10 | 66.92 | b2b3b4b6b9b10y2y6y9y14         | 1630.85 | 53.330  | 33509 | 3 | 544.29  | -13.92 |
| P22107 TRAT_SALTY TraT complement resistance protein; | 3  | Carbamidomethyl+C(16)                   | LMMVTLVSSTLALSGCGAMSTAIK               | 5   | 24 | 4  | 22    | b8y2y12y13                     | 2442.28 | 136.135 | 8349  | 3 | 814.76  | 11.90  |
| P22107 TRAT_SALTY TraT complement resistance protein; | 4  |                                         | AYYWIQANVLK                            | 89  | 11 | 3  | 36.06 | b6b8b10                        | 1368.74 | 90.696  | 4395  | 2 | 684.88  | 9.72   |
| P22107 TRAT_SALTY TraT complement resistance protein; | 5  |                                         | IQTSTETGNQHK                           | 196 | 12 | 5  | 44.91 | y5y6y8°y8y10                   | 1343.63 | 14.598  | 9809  | 3 | 448.55  | -16.90 |
| P22107 TRAT_SALTY TraT complement resistance protein; | 6  |                                         | TKATVTTDNVAALR                         | 175 | 14 | 5  | 42.4  | b8y3y8y9y11                    | 1460.79 | 41.187  | 13655 | 3 | 487.60  | -14.79 |
| P22107 TRAT_SALTY TraT complement resistance protein; | 7  |                                         | IQTSTETGNQHKYQTR                       | 196 | 16 | 4  | 23.69 | b5b6°b6y12                     | 1891.95 | 59.444  | 6439  | 2 | 946.48  | 13.10  |
| P22107 TRAT_SALTY TraT complement resistance protein; | 8  |                                         | NTSDKDMSDLQSLIAK                       | 58  | 16 | 4  | 17.15 | b3b5y11*y11                    | 1765.89 | 116.175 | 2260  | 2 | 883.45  | 14.10  |

|                                                            |    |                                             |                                       |     |    |    |        |                                         |         |         |       |   |         |        |
|------------------------------------------------------------|----|---------------------------------------------|---------------------------------------|-----|----|----|--------|-----------------------------------------|---------|---------|-------|---|---------|--------|
| P22107 TRAT_SALTY TraT complement resistance protein;      | 9  | Carbamidomethyl+C(16)<br>;Phosphoryl STY(5) | LMMVTLVSSTLALSGCGAMSTAI<br>KK         | 5   | 25 | 4  | 27.86  | b3b4b12b14                              | 2650.26 | 87.940  | 1781  | 2 | 1325.64 | -12.99 |
| P22107 TRAT_SALTY TraT complement resistance protein;      | 10 | Carbamidomethyl+C(16)<br>;Oxidation+M()     | LMMVTLVSSTLALSGCGAMSTAI<br>KK         | 5   | 25 | 4  | 23.09  | b3b4b9y12                               | 2586.32 | 104.274 | 1703  | 3 | 862.78  | -6.89  |
| P22107 TRAT_SALTY TraT complement resistance protein;      | 11 | Oxidation+M(2)                              | DMSDLQSLIAKDIAK                       | 63  | 16 | 3  | 23.69  | b10b11y12                               | 1791.93 | 136.750 | 1523  | 1 | 1791.93 | 6.68   |
| P22107 TRAT_SALTY TraT complement resistance protein;      | 12 |                                             | TDNVAALR                              | 181 | 8  | 0  | 2.83   |                                         | 859.47  | 45.435  | 2515  | 2 | 430.24  | 6.75   |
| Q7CQV9 DPS_SALTY DNA protection during starvation protein; | 1  |                                             | AVQLGGVALGTTQVINSK                    | 83  | 18 | 8  | 24.81  | b1b2b4y3y11y14°y14y18                   | 1756.00 | 67.311  | 20694 | 2 | 878.50  | 0.42   |
| Q7CQV9 DPS_SALTY DNA protection during starvation protein; | 2  |                                             | ASNLLYTR                              | 10  | 8  | 5  | 40.86  | y1y3y4y5y8                              | 937.50  | 44.185  | 16776 | 2 | 469.25  | -9.31  |
| Q7CQV9 DPS_SALTY DNA protection during starvation protein; | 3  |                                             | TALTDHLDTMAER                         | 70  | 13 | 6  | 56.31  | b5b10y3y7y8y9                           | 1473.68 | 52.316  | 40172 | 3 | 491.90  | -16.65 |
| Q7CQV9 DPS_SALTY DNA protection during starvation protein; | 4  |                                             | FLWFIESNIE                            | 157 | 10 | 4  | 47.9   | b4b7b9y9                                | 1297.62 | 71.328  | 27436 | 2 | 649.32  | -16.84 |
| Q7CQV9 DPS_SALTY DNA protection during starvation protein; | 5  |                                             | SYPLDIHNVQDHLK                        | 105 | 14 | 3  | 24.72  | b3y7y8                                  | 1678.87 | 70.049  | 11510 | 2 | 839.94  | 11.12  |
| Q7CQV9 DPS_SALTY DNA protection during starvation protein; | 6  |                                             | ASNLLYTRNDVSESDK                      | 10  | 16 | 4  | 24.86  | b3b10*b10b14                            | 1811.90 | 89.611  | 22272 | 3 | 604.64  | 10.98  |
| P41033 PCKA_SALTY Phohoenolpyruvate carboxykinase [ATP];   | 1  |                                             | MQAAGAQAAYLVNTGWNGTGK                 | 426 | 20 | 8  | 33.45  | b2b5y8y10y14*y14y16y20                  | 2037.99 | 78.165  | 30204 | 3 | 680.00  | 4.01   |
| P41033 PCKA_SALTY Phohoenolpyruvate carboxykinase [ATP];   | 2  |                                             | LTANQTQYHFLSGFTAK                     | 371 | 17 | 6  | 26.14  | b11y1y6y10y15y17                        | 1926.95 | 67.787  | 26230 | 3 | 642.99  | -11.40 |
| P41033 PCKA_SALTY Phohoenolpyruvate carboxykinase [ATP];   | 3  |                                             | NTYASPEQWQEK                          | 495 | 12 | 5  | 48.12  | b3b4y7y8y10                             | 1480.69 | 44.499  | 21073 | 2 | 740.85  | 11.46  |
| P41033 PCKA_SALTY Phohoenolpyruvate carboxykinase [ATP];   | 4  | Carbamidomethyl+C(21)                       | LIGDDEHGWDDDGVFNFEGGCY<br>AK          | 263 | 24 | 3  | 12.7   | b6b14y9                                 | 2716.13 | 79.079  | 11711 | 3 | 906.05  | 2.34   |
| P41033 PCKA_SALTY Phohoenolpyruvate carboxykinase [ATP];   | 5  |                                             | AYGINDVQDIVYNPSYDTLYQEEL<br>NPGLEGYER | 12  | 33 | 14 | 102.63 | b4b5b10b11b12°b12b13y2<br>y3y4y6y8y9y10 | 3837.80 | 90.670  | 8763  | 3 | 1279.94 | 6.74   |
| P41033 PCKA_SALTY Phohoenolpyruvate carboxykinase [ATP];   | 6  |                                             | MQAAGAQAAYLVNTGWNGTGKR                | 426 | 21 | 5  | 22.32  | b8*b8y2y10y11                           | 2194.09 | 59.753  | 1965  | 2 | 1097.55 | 5.12   |
| P41033 PCKA_SALTY Phohoenolpyruvate carboxykinase [ATP];   | 7  |                                             | GVLTNLGAVAVDTGIFTGR                   | 45  | 19 | 3  | 21.89  | y4y8y10                                 | 1861.01 | 93.800  | 8688  | 2 | 931.01  | -3.21  |
| P41033 PCKA_SALTY Phohoenolpyruvate carboxykinase [ATP];   | 8  |                                             | TTLSTDPK                              | 253 | 8  | 5  | 67.3   | b4b5b6y5y7                              | 862.47  | 28.107  | 6308  | 2 | 431.74  | 17.20  |
| P41033 PCKA_SALTY Phohoenolpyruvate carboxykinase [ATP];   | 9  |                                             | NMFIRPTDEELVGFKPDFIVMNGA<br>K         | 148 | 25 | 3  | 12.4   | b5y3y13                                 | 2868.44 | 57.383  | 4468  | 3 | 956.82  | -0.51  |
| P41033 PCKA_SALTY Phohoenolpyruvate carboxykinase [ATP];   | 10 |                                             | NDNKPLSQETWQHLLK                      | 90  | 15 | 3  | 26.21  | y7y9y10                                 | 1837.91 | 77.865  | 4169  | 3 | 613.31  | -6.11  |



|                                                             |    |                    |                          |     |    |    |       |                              |         |         |       |   |         |        |
|-------------------------------------------------------------|----|--------------------|--------------------------|-----|----|----|-------|------------------------------|---------|---------|-------|---|---------|--------|
| P41033 PCKA_SALTY<br>Phohoenolpyruvate carboxykinase [ATP]; | 11 |                    | LPLFDLAIPTELPGVDTHILDPR  | 472 | 23 | 3  | 34.89 | y8y9y10                      | 2542.34 | 107.005 | 3993  | 3 | 848.12  | -19.21 |
| P41033 PCKA_SALTY<br>Phohoenolpyruvate carboxykinase [ATP]; | 12 |                    | DALLENVTVR               | 305 | 10 | 3  | 28.66 | b5b6y3                       | 1129.61 | 25.791  | 1994  | 2 | 565.31  | -14.37 |
| P41033 PCKA_SALTY<br>Phohoenolpyruvate carboxykinase [ATP]; | 13 |                    | NTYASPEQWQEKATALAK       | 495 | 18 | 3  | 15.58 | b10b13y12                    | 2036.02 | 73.288  | 15306 | 3 | 679.34  | 3.84   |
| P41033 PCKA_SALTY<br>Phohoenolpyruvate carboxykinase [ATP]; | 14 |                    | GDVAVFFGLSGTGKTTLSTDPK   | 239 | 22 | 3  | 19.95 | b4b15b19                     | 2198.11 | 115.256 | 12474 | 3 | 733.37  | -11.44 |
| P41033 PCKA_SALTY<br>Phohoenolpyruvate carboxykinase [ATP]; | 15 |                    | LFIEFEEKYTDTPAGEALVSAGPK | 513 | 24 | 7  | 40.19 | b5*b5b6*b6b8b9y12            | 2597.29 | 69.032  | 6015  | 3 | 866.44  | -8.18  |
| P41033 PCKA_SALTY<br>Phohoenolpyruvate carboxykinase [ATP]; | 16 |                    | YIVRDDTTR                | 69  | 9  | 3  | 30.48 | b7y6y7                       | 1138.58 | 120.347 | 5481  | 1 | 1138.58 | -7.29  |
| P41033 PCKA_SALTY<br>Phohoenolpyruvate carboxykinase [ATP]; | 17 |                    | DTRAIIDAILNGSLDNAETFR    | 451 | 21 | 3  | 23.52 | y8y9y12                      | 2305.18 | 78.366  | 5282  | 2 | 1153.09 | -0.85  |
| P41033 PCKA_SALTY<br>Phohoenolpyruvate carboxykinase [ATP]; | 18 |                    | MQAAGAQAAYLVNTGWNGTGKR   | 426 | 21 | 4  | 13.87 | b10b14°b14y7                 | 2194.09 | 106.985 | 2118  | 3 | 732.03  | 1.67   |
| P41033 PCKA_SALTY<br>Phohoenolpyruvate carboxykinase [ATP]; | 19 |                    | RMQAAGAQAAYLVNTGWNGTGK   | 425 | 21 | 10 | 47.06 | b9b11b12y5°y5y6*y6y10*y10y17 | 2194.11 | 136.266 | 1944  | 2 | 1097.56 | 14.58  |
| P41033 PCKA_SALTY<br>Phohoenolpyruvate carboxykinase [ATP]; | 20 | Phosphoryl STY(12) | LTANQTQYHFLSGFTAK        | 371 | 17 | 7  | 48.69 | b4°b4b7b9b10°b10b11          | 2006.91 | 94.360  | 8259  | 3 | 669.64  | -10.16 |
