# Supplementary material for: Phenotypic profile linked to inhibition of the major Zn influx system in Salmonella enterica : proteomics and ionomics investigations
Source: Royal Society of Chemistry journal article supplement (doi:10.1039/c0mb00140f), 2010-10-20
Supplement: c0mb00140f.zip [file c0mb00140f.zip]

SA123 + Zn(II) LC-MS run 2: 123\_Zn\_220709\_1a2\_02

| Protein name                                                | Peptide Rank | Peptide Modification | Peptide Sequence           | Peptide sequence start | Peptide sequence Length | Peptide Matched Products | Peptide Score | By Matches                                                                                                                                                  | Precursor MH+ (Da) | Retention time (min) | Intensity | z | Precursor m/z | MH+ Error (ppm) |
|-------------------------------------------------------------|--------------|----------------------|----------------------------|------------------------|-------------------------|--------------------------|---------------|-------------------------------------------------------------------------------------------------------------------------------------------------------------|--------------------|----------------------|-----------|---|---------------|-----------------|
| [P0A1S2]HNS_SALTY DNA-binding protein H-NS                  | 1            |                      | EMLIADGIDPNELLNSMAAAK      | 62                     | 21                      | 54                       | 374.09        | b2°b2b3°b3b4°b4b5°b5b6°b6b7°b7b8°b8b9b12°b12b13b14°b14b15b17b18b21y1y2y3y4y5y6°y6y7°y7*y7y8y9y10y11°y11*y11y12*y12y13°y13y14*y14y15°y15y16°y16y17*y17y18y21 | 2216.11            | 96.198               | 496962    | 2 | 1108.56       | 6.28            |
| [P0A1S2]HNS_SALTY DNA-binding protein H-NS                  | 2            |                      | YSYVDENGETK                | 96                     | 11                      | 12                       | 113.03        | b6y2y3y4y5y6y7y8y9y10°y10y11                                                                                                                                | 1304.56            | 32.198               | 103748    | 2 | 652.79        | -0.19           |
| [P0A1S2]HNS_SALTY DNA-binding protein H-NS                  | 3            | Carbamidomethyl+C(2) | ECTLETLEEMLEK              | 19                     | 13                      | 8                        | 32.08         | b2b7y1y5y8°y8y9y13                                                                                                                                          | 1624.76            | 92.297               | 44890     | 2 | 812.88        | 7.06            |
| [P0A1S2]HNS_SALTY DNA-binding protein H-NS                  | 4            |                      | TPAVIKK                    | 114                    | 7                       | 7                        | 50.41         | b1b3y1y3y5y6y7                                                                                                                                              | 756.49             | 19.192               | 38481     | 2 | 378.75        | -12.26          |
| [P0A1S2]HNS_SALTY DNA-binding protein H-NS                  | 5            |                      | EEESAAAAEVEER              | 41                     | 13                      | 5                        | 41.11         | y4y7y8y11y13                                                                                                                                                | 1419.63            | 34.046               | 12768     | 2 | 710.32        | 6.97            |
| [P0A1S2]HNS_SALTY DNA-binding protein H-NS                  | 6            |                      | LEV VVNERR                 | 32                     | 9                       | 3                        | 38.08         | y3y4y8                                                                                                                                                      | 1113.62            | 54.270               | 6815      | 2 | 557.31        | -14.91          |
| [P0A1S2]HNS_SALTY DNA-binding protein H-NS                  | 7            |                      | YSYVDENGETKTWTGQGR         | 96                     | 18                      | 14                       | 132.82        | b3°b3y4y6y8°y8y11*y11y12y13y14y15y16y17                                                                                                                     | 2090.93            | 46.463               | 169043    | 3 | 697.65        | -6.31           |
| [P0A1S2]HNS_SALTY DNA-binding protein H-NS                  | 8            |                      | TPAVIKK                    | 114                    | 7                       | 4                        | 53.42         | y3y4y5y6                                                                                                                                                    | 756.49             | 18.462               | 19595     | 2 | 378.75        | -12.02          |
| [P0A1S2]HNS_SALTY DNA-binding protein H-NS                  | 9            | Oxidation+M(7)       | LQQYREMLIADGIDPNELLNSMAAAK | 57                     | 26                      | 5                        | 15.65         | b3b6y7y10*y10                                                                                                                                               | 2920.43            | 136.252              | 1858      | 3 | 974.15        | -7.19           |
| [P0A2H9]DSBA_SALTY Thiol:disulfide interchange protein dsbA | 1            |                      | YQINPQGMDTSSMDVFVQQYADTVK  | 176                    | 25                      | 20                       | 113.37        | b2°b2b3b4°b4b7b13b15b17b21y1y5y6y7°y7*y7y8y9y12y25                                                                                                          | 2865.30            | 85.725               | 110437    | 3 | 955.77        | -2.30           |
| [P0A2H9]DSBA_SALTY Thiol:disulfide interchange protein dsbA | 2            |                      | AAADLQLQGV PAMFVNGK        | 158                    | 18                      | 29                       | 262.9         | b2b4b5b6b7°b7b8b9b10b13b14b15b17y1y2y3*y3y5y6y7y8°y8y9y10y11*y11y12y13y18                                                                                   | 1829.96            | 79.970               | 108037    | 2 | 915.48        | 2.33            |
| [P0A2H9]DSBA_SALTY Thiol:disulfide interchange protein dsbA | 3            |                      | TQTVQSAADIR                | 116                    | 11                      | 8                        | 41.26         | b2b3°b8y2y7y8y9y11                                                                                                                                          | 1189.61            | 34.558               | 35764     | 2 | 595.31        | -4.31           |
| [P0A2H9]DSBA_SALTY Thiol:disulfide interchange protein dsbA | 4            |                      | ELTQAWAVAMALGVEDK          | 88                     | 17                      | 4                        | 16.18         | b5b16°b16y4                                                                                                                                                 | 1831.90            | 119.563              | 1644      | 3 | 611.31        | -11.59          |
| [P0A2H9]DSBA_SALTY Thiol:disulfide interchange protein dsbA | 5            |                      | SLVAQQEK                   | 150                    | 8                       | 4                        | 32.9          | b4°b4b5y7                                                                                                                                                   | 902.48             | 39.862               | 8073      | 2 | 451.74        | -17.18          |
| [P0A2H9]DSBA_SALTY Thiol:disulfide interchange protein dsbA | 6            |                      | VFVDAGVKGEDYDAAWSFVVK      | 128                    | 22                      | 5                        | 25.36         | b6b13b15y13y21                                                                                                                                              | 2416.16            | 80.719               | 5432      | 2 | 1208.58       | -8.99           |
| [P0A2H9]DSBA_SALTY Thiol:disulfide interchange protein dsbA | 7            |                      | GEDYDAAWSFVVKSLVAQQEK      | 136                    | 22                      | 3                        | 34.67         | y3y4y5                                                                                                                                                      | 2484.18            | 91.257               | 4799      | 3 | 828.73        | -11.50          |
| [P0A2H9]DSBA_SALTY Thiol:disulfide interchange protein dsbA | 8            | Oxidation+M(10)      | ELTQAWAVAMALGVEDK          | 88                     | 17                      | 3                        | 16.18         | b4b10y5                                                                                                                                                     | 1847.90            | 55.853               | 9412      | 4 | 462.73        | -8.59           |
| [P0A2H9]DSBA_SALTY Thiol:disulfide interchange protein dsbA | 9            | Oxidation+M()        | YQINPQGMDTSSMDVFVQQYADTVK  | 176                    | 25                      | 6                        | 39.08         | b3b4b5y8y10°y10                                                                                                                                             | 2881.31            | 72.540               | 2038      | 2 | 1441.16       | 2.46            |

|                                           |    |                       |                                    |     |    |    |        |                                                                                                                                                           |         |         |        |   |         |        |
|-------------------------------------------|----|-----------------------|------------------------------------|-----|----|----|--------|-----------------------------------------------------------------------------------------------------------------------------------------------------------|---------|---------|--------|---|---------|--------|
| P0A1H5 EFTU_SALTY Elongation factor<br>Tu | 1  |                       | AIDKPFLLPIDVFSISGR                 | 205 | 19 | 13 | 93.78  | b7b8b12y2y3y4y5y6y7y9°y<br>9y11y19                                                                                                                        | 2117.15 | 104.993 | 602343 | 3 | 706.39  | -8.88  |
| P0A1H5 EFTU_SALTY Elongation factor<br>Tu | 2  |                       | ELLSQYDFPGDDTPIVR                  | 155 | 17 | 26 | 190.05 | b2°b2b3°b3b5°b5b6b7b15y<br>1y3y4y5y6y8y9°y9y10y11y<br>12°y12y13°y13y14°y14y17                                                                             | 1964.97 | 76.075  | 358238 | 2 | 982.99  | 4.54   |
| P0A1H5 EFTU_SALTY Elongation factor<br>Tu | 3  |                       | TTLTAAITTVLAK                      | 25  | 13 | 11 | 74.4   | b2°b2b13y2y3y6y7y8y9y10<br>y13                                                                                                                            | 1303.78 | 84.098  | 314338 | 2 | 652.39  | -3.37  |
| P0A1H5 EFTU_SALTY Elongation factor<br>Tu | 4  |                       | AGENVGVLLR                         | 270 | 10 | 16 | 112.61 | b2b4b5°b5°b5b7°b7y1y2y3<br>y4y5y6y7y9y10                                                                                                                  | 1027.58 | 55.898  | 302300 | 2 | 514.29  | -11.88 |
| P0A1H5 EFTU_SALTY Elongation factor<br>Tu | 5  |                       | IIELAGFLDSYIPEPER                  | 188 | 17 | 29 | 245.36 | b2b3b4b5b7b11°b11b12°b<br>12b14y2°y2y3°y3y4°y4y5y<br>6y7y8°y8y9y10y11y12y13y<br>14y15y17                                                                  | 1962.03 | 101.341 | 299390 | 2 | 981.52  | 3.67   |
| P0A1H5 EFTU_SALTY Elongation factor<br>Tu | 6  |                       | GITINTSHVEYDTPTR                   | 59  | 16 | 33 | 220.41 | b2b3°b3b8°b8b9°b9b10b1<br>2b13b16y1y3y4°y4y5°y5y6<br>°y6y7°y7y8°y8y9y10°y10y<br>11y12°y12y13y14°y14y16                                                    | 1803.87 | 49.114  | 282074 | 3 | 601.96  | -11.30 |
| P0A1H5 EFTU_SALTY Elongation factor<br>Tu | 7  |                       | TTDVTGTIELPEGVEMVMPGDNI<br>K       | 334 | 24 | 47 | 315.81 | b1b2°b2b3°b3b4b5°b5b7b8<br>°b8b10°b10b11b12b13b14<br>b17°b17b18y3y4y5°y5y6°y<br>6°y6y7°y7°y7y8y9°y9°y9y<br>10y12y13°y13y14°y14y15y<br>16°y16y17y20y24°y24 | 2546.24 | 85.926  | 250488 | 2 | 1273.63 | 2.97   |
| P0A1H5 EFTU_SALTY Elongation factor<br>Tu | 8  |                       | QVGVPYIIVFLNK                      | 124 | 13 | 10 | 76.09  | b3b4°b4b13y4y5y6y9y11y<br>13                                                                                                                              | 1489.87 | 98.552  | 243241 | 2 | 745.44  | -1.97  |
| P0A1H5 EFTU_SALTY Elongation factor<br>Tu | 9  |                       | ALEGDAEWEAK                        | 177 | 11 | 3  | 31.12  | y4y5y8                                                                                                                                                    | 1218.56 | 45.827  | 166433 | 2 | 609.79  | -0.30  |
| P0A1H5 EFTU_SALTY Elongation factor<br>Tu | 10 | Carbamidomethyl+C(3)  | STCTGVEMFR                         | 253 | 10 | 10 | 67.8   | b2°b2y2y3y4y6y7y8°y8y10                                                                                                                                   | 1187.52 | 52.401  | 115548 | 2 | 594.26  | -1.03  |
| P0A1H5 EFTU_SALTY Elongation factor<br>Tu | 11 | Carbamidomethyl+C(1)  | CDMVDDEELLELVEMEV                  | 137 | 18 | 15 | 96.66  | b2b3b4y2y4y5°y5y6y7y8°y<br>8y9y14°y14y18                                                                                                                  | 2224.00 | 105.481 | 87097  | 2 | 1112.50 | 7.36   |
| P0A1H5 EFTU_SALTY Elongation factor<br>Tu | 12 |                       | VGEEVEIVGIK                        | 238 | 11 | 5  | 31.12  | b2y4y5y10y11                                                                                                                                              | 1171.66 | 59.650  | 60354  | 2 | 586.33  | -0.52  |
| P0A1H5 EFTU_SALTY Elongation factor<br>Tu | 13 |                       | MVVTLIHPIAMDDGLR                   | 358 | 16 | 19 | 192.21 | b3b4b5°b5y3y4y5°y5y6y7y<br>8y9°y9y10°y10y11y12y13y<br>15                                                                                                  | 1780.92 | 78.706  | 708245 | 3 | 594.31  | -15.01 |
| P0A1H5 EFTU_SALTY Elongation factor<br>Tu | 14 |                       | TVGAGVVAK                          | 382 | 9  | 6  | 78.78  | b4b7y3y5y7y8                                                                                                                                              | 801.47  | 27.718  | 211302 | 2 | 401.24  | -15.38 |
| P0A1H5 EFTU_SALTY Elongation factor<br>Tu | 15 |                       | LLDEGR                             | 264 | 6  | 3  | 39.86  | b4y4y5                                                                                                                                                    | 702.38  | 25.917  | 20077  | 1 | 702.38  | 2.61   |
| P0A1H5 EFTU_SALTY Elongation factor<br>Tu | 16 |                       | NMITGAAQMDGAILVVAATDGP<br>MPQTR    | 90  | 27 | 4  | 35.2   | b8b9b10y6                                                                                                                                                 | 2729.31 | 105.003 | 17980  | 3 | 910.44  | -13.06 |
| P0A1H5 EFTU_SALTY Elongation factor<br>Tu | 17 | Carbamidomethyl+C(7)  | HYAHVDCPGHADYVK                    | 75  | 15 | 3  | 17.99  | b3y5y9                                                                                                                                                    | 1768.81 | 81.294  | 7164   | 3 | 590.28  | 15.39  |
| P0A1H5 EFTU_SALTY Elongation factor<br>Tu | 18 |                       | TKPHVNVGTIGHVDHGK                  | 8   | 17 | 5  | 25.94  | b3y3y7°y7y9                                                                                                                                               | 1795.92 | 39.397  | 1938   | 5 | 359.99  | -19.64 |
| P0A1H5 EFTU_SALTY Elongation factor<br>Tu | 19 | Carbamidomethyl+C(14) | QVGVPYIIVFLNKCDMVDDEELLE<br>LVEMEV | 124 | 31 | 7  | 62     | b4°b4y3y4y5y6y7                                                                                                                                           | 3694.83 | 126.915 | 40603  | 3 | 1232.28 | -4.29  |
| P0A1H5 EFTU_SALTY Elongation factor<br>Tu | 20 |                       | GSALKALEGDAEWEAK                   | 172 | 16 | 5  | 24.72  | y6°y6y8y10°y10                                                                                                                                            | 1674.83 | 85.822  | 8944   | 2 | 837.92  | 0.66   |
| P0A1H5 EFTU_SALTY Elongation factor<br>Tu | 21 |                       | TTLTAAITTVLAKTYGGAAR               | 25  | 20 | 3  | 14.26  | b5y6y9                                                                                                                                                    | 1980.13 | 103.432 | 1649   | 3 | 660.72  | 9.68   |
| P0A1H5 EFTU_SALTY Elongation factor<br>Tu | 22 | Oxidation+M(1)        | MVVTLIHPIAMDDGLR                   | 358 | 16 | 6  | 35.16  | b4°b4b12y8y9y13                                                                                                                                           | 1796.92 | 73.274  | 44233  | 3 | 599.65  | -9.65  |

|                                                     |    |                   |                                   |     |    |    |        |                                                                              |         |         |        |   |         |        |
|-----------------------------------------------------|----|-------------------|-----------------------------------|-----|----|----|--------|------------------------------------------------------------------------------|---------|---------|--------|---|---------|--------|
| P0A1H5 EFTU_SALTY Elongation factor Tu              | 23 | Oxidation+M(16)   | TTDVTGTIELPEGVEMVMPGDNI<br>K      | 334 | 24 | 4  | 12.62  | b3b12°b12y8                                                                  | 2562.24 | 78.619  | 4562   | 2 | 1281.62 | 2.38   |
| P0A1H5 EFTU_SALTY Elongation factor Tu              | 24 |                   | TINTSHVEYDTPTR                    | 61  | 14 | 3  | 14.28  | b4*b4b10                                                                     | 1633.79 | 49.100  | 17189  | 2 | 817.40  | 6.87   |
| P0A1H5 EFTU_SALTY Elongation factor Tu              | 25 |                   | TTDVTGTIELPEGVEM                  | 334 | 16 | 3  | 12.26  | y3°y3y13                                                                     | 1691.78 | 85.965  | 3095   | 3 | 564.60  | -12.05 |
| P0A1H5 EFTU_SALTY Elongation factor Tu              | 26 |                   | GITINTSHVEYDTPTR                  | 59  | 16 | 0  | 4.52   |                                                                              | 1785.87 | 49.106  | 19525  | 3 | 595.96  | -0.89  |
| Q7CQ05 GRCA_SALTY Autonomous glycy radical cofactor | 1  |                   | SGFAEDEVVAVSK                     | 35  | 13 | 16 | 117    | b2b3b4°b4b10y1y2°y2y3y4y7y8y9y10y12y13                                       | 1337.66 | 53.825  | 199892 | 2 | 669.33  | -0.46  |
| Q7CQ05 GRCA_SALTY Autonomous glycy radical cofactor | 2  |                   | LGEIEYR                           | 48  | 7  | 11 | 63.56  | b2b3°b3y1y2y3y4y5y6°y6y7                                                     | 879.45  | 41.653  | 187778 | 2 | 440.23  | -10.13 |
| Q7CQ05 GRCA_SALTY Autonomous glycy radical cofactor | 3  |                   | MITGIQITK                         | 0   | 9  | 11 | 64.38  | b1b2b3y1y2y3y4°y4y6y7y9                                                      | 1004.57 | 54.523  | 173150 | 2 | 502.79  | -9.54  |
| Q7CQ05 GRCA_SALTY Autonomous glycy radical cofactor | 4  |                   | EIPMEVKPEVR                       | 55  | 11 | 10 | 86.73  | b4y1y2y3y4y5y6y8y9y11                                                        | 1326.71 | 48.332  | 166178 | 2 | 663.86  | -2.30  |
| Q7CQ05 GRCA_SALTY Autonomous glycy radical cofactor | 5  |                   | VEGGQHLNVNVLR                     | 66  | 13 | 14 | 84.68  | b2°b2b5b7°b7b11°b11y3y4°y4y6y7y8y13                                          | 1434.77 | 49.966  | 113441 | 3 | 478.93  | -10.89 |
| Q7CQ05 GRCA_SALTY Autonomous glycy radical cofactor | 6  |                   | FNSLTPEQQR                        | 106 | 10 | 21 | 112.61 | b2°b2b3°b3b5b10y2y3°y3y4°y4y5°y5°y5y6y7y8°y8y9°y9y10                         | 1219.60 | 37.402  | 103979 | 2 | 610.31  | -3.20  |
| Q7CQ05 GRCA_SALTY Autonomous glycy radical cofactor | 7  |                   | FNSLTPEQQRDVIAR                   | 106 | 15 | 10 | 52     | b3°b3b11y1y4y6y10°y10y13y15                                                  | 1773.91 | 47.028  | 48297  | 3 | 591.98  | -7.71  |
| Q7CQ05 GRCA_SALTY Autonomous glycy radical cofactor | 8  |                   | AANDDLLNSFWLLDSEK                 | 9   | 17 | 4  | 23.58  | b8b10b13°b13                                                                 | 1950.94 | 98.288  | 3483   | 2 | 975.97  | -4.07  |
| Q7CQ05 GRCA_SALTY Autonomous glycy radical cofactor | 9  |                   | TFTESL                            | 121 | 6  | 5  | 39.86  | b4°b4b5°b5y4                                                                 | 697.34  | 54.751  | 71604  | 1 | 697.34  | -1.58  |
| Q7CQ05 GRCA_SALTY Autonomous glycy radical cofactor | 10 |                   | AANDDLLNSFWLLDSEKGEAR             | 9   | 21 | 28 | 255.75 | b3b4b5°b5b6°b6b7°b7y3y4y5y7°y7y8°y8y9y10y11°y11y12y13y14°y14y15y16°y16y17y19 | 2364.14 | 92.119  | 426348 | 3 | 788.72  | -3.61  |
| Q7CQ05 GRCA_SALTY Autonomous glycy radical cofactor | 11 |                   | HPEKYPQLTIR                       | 88  | 11 | 4  | 50.29  | b4b5b7b9                                                                     | 1381.76 | 72.434  | 9999   | 3 | 461.26  | 2.39   |
| Q7CQ05 GRCA_SALTY Autonomous glycy radical cofactor | 12 |                   | PMEVKPEVR                         | 57  | 9  | 2  | 21.77  | b3b4                                                                         | 1084.58 | 48.345  | 142483 | 2 | 542.79  | -2.70  |
| Q7CQ05 GRCA_SALTY Autonomous glycy radical cofactor | 13 |                   | EIPMEVKPEVR                       | 55  | 11 | 0  | 2.46   |                                                                              | 1308.68 | 48.364  | 49905  | 3 | 436.90  | -9.33  |
| P0A1R6 DBHA_SALTY DNA-binding protein HU-alpha      | 1  |                   | IAAANVPAFVSGK                     | 70  | 13 | 26 | 208.9  | b2b3b4b5°b5b6°b6b8b10y1y2y3y4y5y6y7°y7y8y9y10°y10y11°y11°y11y12y13           | 1244.70 | 58.966  | 727916 | 2 | 622.85  | 0.39   |
| P0A1R6 DBHA_SALTY DNA-binding protein HU-alpha      | 2  |                   | AALESTLAAITESLKEGDAVQLVG<br>FGTFK | 22  | 29 | 13 | 56.85  | b2b3b4b7°b7b23y3y6°y6y7y8y14y29                                              | 2966.56 | 115.501 | 351796 | 3 | 989.53  | -3.46  |
| P0A1R6 DBHA_SALTY DNA-binding protein HU-alpha      | 3  |                   | NPQTGKEIK                         | 61  | 9  | 15 | 93.69  | b1b2°b2b3°b3b4°b4°b4b6y2y3°y3y5y6y8                                          | 1014.55 | 14.382  | 4799   | 2 | 507.78  | -3.61  |
| P0A1R6 DBHA_SALTY DNA-binding protein HU-alpha      | 4  |                   | TQLIDVIADKAELSK                   | 3   | 15 | 19 | 179.74 | b3°b3b4b5°b5b6°b6y3y4°y4y5y6y7y8°y8y10y11y12y13                              | 1643.90 | 71.486  | 642679 | 3 | 548.64  | -14.70 |
| P0A1R6 DBHA_SALTY DNA-binding protein HU-alpha      | 5  |                   | AALESTLAAITESLKEGDAVQLVG<br>FGTFK | 22  | 29 | 4  | 11.47  | b5°b5y3y5                                                                    | 2966.56 | 117.870 | 3106   | 2 | 1483.78 | -3.87  |
| P0A1R6 DBHA_SALTY DNA-binding protein HU-alpha      | 6  | Phosphoryl STY(6) | AALESTLAAITESLK                   | 22  | 15 | 5  | 44.41  | b5b10b12b14y10                                                               | 1597.81 | 115.769 | 2903   | 2 | 799.41  | 6.57   |
| P0A1R6 DBHA_SALTY DNA-binding protein HU-alpha      | 7  |                   | PQTGKEIK                          | 62  | 8  | 2  | 8.77   | b5°b5                                                                        | 900.53  | 14.285  | 8613   | 2 | 450.77  | 14.57  |
| P64076 ENO_SALTY Enolase                            | 1  |                   | FNQIGSLTETLAAIK                   | 342 | 15 | 22 | 183.56 | b2°b2b3°b3b4°b4b5b7°b7b14y2y3y4y6y7y8y9y10y11y12y13y15                       | 1605.88 | 85.107  | 331598 | 2 | 803.45  | -0.99  |

|                                                          |    |                   |                                     |     |    |    |        |                                                                                                                                  |         |         |        |   |         |        |
|----------------------------------------------------------|----|-------------------|-------------------------------------|-----|----|----|--------|----------------------------------------------------------------------------------------------------------------------------------|---------|---------|--------|---|---------|--------|
| P64076 ENO_SALTY Enolase                                 | 2  |                   | SGETEDATIADLAVGTAAGQIK              | 371 | 22 | 32 | 251.46 | b2b3b4b5b10b11b12°b12b13°b13b14°b14b18y2y3y4y5y6°y6y7°y7y8°y8°y8y9y10y12y13y14y16y17y22                                          | 2118.07 | 74.547  | 230748 | 2 | 1059.54 | 5.19   |
| P64076 ENO_SALTY Enolase                                 | 3  |                   | GMNTAVGDEGGYAPNLGSNAEALAVIAEAVK     | 200 | 31 | 30 | 209.9  | b2b3b4b5°b5b6°b6°b6b13b16b17°b17b26b27b30y1y2y3y4y5y6y7y8y10y11y14y15y18y19y31                                                   | 2989.46 | 94.298  | 176502 | 3 | 997.16  | -0.25  |
| P64076 ENO_SALTY Enolase                                 | 4  |                   | YSMPVPMMNIIINGGEHADNNVDIQEFMIQPVGAK | 143 | 34 | 12 | 72.42  | b2b4b5y3y5y9y11y12y13y29y31y34                                                                                                   | 3759.76 | 97.872  | 142533 | 3 | 1253.93 | -0.13  |
| P64076 ENO_SALTY Enolase                                 | 5  |                   | AVGAVNGPIAQAILGK                    | 66  | 16 | 11 | 92.53  | b2b3b4b5y3y4y10y11y12y14y16                                                                                                      | 1478.87 | 74.445  | 141302 | 2 | 739.94  | -2.06  |
| P64076 ENO_SALTY Enolase                                 | 6  |                   | DAGYTAVISHR                         | 360 | 11 | 16 | 176.41 | b2b3b4b5b7b8b9y3y4°y4y5y6y7y8y9y11                                                                                               | 1189.59 | 40.971  | 114008 | 2 | 595.30  | -2.46  |
| P64076 ENO_SALTY Enolase                                 | 7  |                   | GIANSILIK                           | 333 | 9  | 6  | 54.24  | y2y3y5y6y7y9                                                                                                                     | 928.58  | 60.470  | 109771 | 2 | 464.79  | -7.43  |
| P64076 ENO_SALTY Enolase                                 | 8  |                   | GMPLYEHIAELNGTPGK                   | 126 | 17 | 4  | 16.18  | b12y2y6y12                                                                                                                       | 1826.90 | 66.915  | 78910  | 3 | 609.64  | -8.09  |
| P64076 ENO_SALTY Enolase                                 | 9  |                   | IQLVGDDLFVTNTK                      | 311 | 14 | 15 | 99.79  | b2°b2b3b13y1y2y4y5°y5y6y9y10y11y12y14                                                                                            | 1562.84 | 76.895  | 73466  | 2 | 781.92  | 0.00   |
| P64076 ENO_SALTY Enolase                                 | 10 |                   | AVGAVNGPIAQAILGKDAK                 | 66  | 19 | 5  | 21.77  | b1y3°y3y5y13                                                                                                                     | 1793.01 | 68.220  | 65200  | 3 | 598.34  | -10.21 |
| P64076 ENO_SALTY Enolase                                 | 11 |                   | ILKEGIEK                            | 325 | 8  | 5  | 40.68  | y4y5°y5y6y8                                                                                                                      | 929.56  | 29.534  | 33822  | 2 | 465.28  | -7.75  |
| P64076 ENO_SALTY Enolase                                 | 12 |                   | IEEALGEK                            | 411 | 8  | 6  | 35.91  | b2b5y1y3y7y8                                                                                                                     | 888.46  | 30.490  | 31597  | 2 | 444.73  | -7.21  |
| P64076 ENO_SALTY Enolase                                 | 13 |                   | AVGAVNGPIAQAILGKDAKDQAGIDK          | 66  | 26 | 4  | 21.84  | b3b4y7°y7                                                                                                                        | 2520.34 | 86.998  | 11339  | 3 | 840.79  | -13.37 |
| P64076 ENO_SALTY Enolase                                 | 14 |                   | EALELRDGDK                          | 46  | 10 | 4  | 33.72  | b4b5b8y10                                                                                                                        | 1145.57 | 53.887  | 7856   | 2 | 573.29  | -10.34 |
| P64076 ENO_SALTY Enolase                                 | 15 |                   | YVLAGEGNK                           | 257 | 9  | 5  | 54.24  | y3°y3y5y6y7                                                                                                                      | 950.51  | 32.660  | 116811 | 2 | 475.76  | 19.59  |
| P64076 ENO_SALTY Enolase                                 | 16 |                   | QYPIVSIEDGLDESDDWGFAYQTK            | 282 | 24 | 8  | 32.6   | b8°b8b13y6°y6y8y10y11                                                                                                            | 2776.29 | 93.027  | 78056  | 3 | 926.10  | 9.50   |
| P64076 ENO_SALTY Enolase                                 | 17 |                   | EALELR                              | 46  | 6  | 1  | 13.56  | b4                                                                                                                               | 730.41  | 40.203  | 19750  | 1 | 730.41  | -4.43  |
| P64076 ENO_SALTY Enolase                                 | 18 |                   | IMIDLDGTENK                         | 92  | 11 | 6  | 24.13  | b6y3°y3°y3y5°y5                                                                                                                  | 1248.61 | 109.937 | 9680   | 2 | 624.81  | -4.01  |
| P64076 ENO_SALTY Enolase                                 | 19 |                   | AAAAAKGMPLYEHIAELNGTPGK             | 120 | 23 | 4  | 12.95  | b3y4y9°y9                                                                                                                        | 2310.17 | 66.957  | 46918  | 4 | 578.30  | -10.89 |
| P64076 ENO_SALTY Enolase                                 | 20 |                   | GKGMNTAVGDEGGYAPNLGSNAEALAVIAEAVK   | 198 | 33 | 5  | 17.64  | b7b15b17y4y18                                                                                                                    | 3174.58 | 89.348  | 32434  | 3 | 1058.86 | 0.92   |
| P64076 ENO_SALTY Enolase                                 | 21 |                   | IEEALGEKAPYNGR                      | 411 | 14 | 3  | 27.7   | y5y7y9                                                                                                                           | 1546.77 | 39.193  | 15826  | 3 | 516.26  | -9.08  |
| P64076 ENO_SALTY Enolase                                 | 22 | Phosphoryl STY(8) | FNQIGSLTETLAAIK                     | 342 | 15 | 3  | 24.01  | b6y9y10                                                                                                                          | 1685.83 | 60.008  | 9225   | 3 | 562.61  | -9.05  |
| P64076 ENO_SALTY Enolase                                 | 23 | Oxidation+M(2)    | GMPLYEHIAELNGTPGK                   | 126 | 17 | 7  | 43.27  | b11°b11b12b13y6y8°y8                                                                                                             | 1842.89 | 127.119 | 3044   | 2 | 921.95  | -10.40 |
| P64076 ENO_SALTY Enolase                                 | 24 |                   | GYTAVISHR                           | 362 | 9  | 1  | 7.83   | b3                                                                                                                               | 1003.53 | 40.998  | 43823  | 2 | 502.27  | 0.49   |
| P64076 ENO_SALTY Enolase                                 | 25 |                   | ANSILIK                             | 335 | 7  | 5  | 38.08  | b3b4°b4°b4b5                                                                                                                     | 758.48  | 60.472  | 20912  | 1 | 758.48  | 0.72   |
| P64076 ENO_SALTY Enolase                                 | 26 |                   | AGYTAVISHR                          | 361 | 10 | 0  | 2.46   |                                                                                                                                  | 1074.56 | 40.901  | 7615   | 2 | 537.79  | -4.66  |
| P64076 ENO_SALTY Enolase                                 | 27 |                   | TAVISHR                             | 364 | 7  | 0  | 2.46   |                                                                                                                                  | 783.44  | 40.985  | 4903   | 2 | 392.22  | -6.93  |
| P64076 ENO_SALTY Enolase                                 | 28 |                   | YSMPVPMMNIIINGGEHA                  | 143 | 17 | 4  | 36.38  | y9y13y14y15                                                                                                                      | 1860.85 | 97.895  | 3541   | 3 | 620.95  | 1.05   |
| P0A1P0 G3P1_SALTY Glyceraldehyde-3-phohate dehydrogenase | 1  |                   | VINDNFGIIEGLMTTVHATTATQK            | 160 | 24 | 45 | 308.91 | b2b3b4°b4b5°b5°b5b6°b6b7°b7°b7b8°b8°b8y1y3y5y6y7°y7°y7y8°y8y9y10°y10y11y13y14°y14y15°y15y16°y16y17y18°y18y19y20y21y22°y22y24°y24 | 2574.32 | 97.415  | 638106 | 3 | 858.78  | -2.85  |
| P0A1P0 G3P1_SALTY Glyceraldehyde-3-phohate dehydrogenase | 2  |                   | GASQNIIPSSTGAAK                     | 198 | 15 | 22 | 155.8  | b5°b5°b5b6°b6°b6b7°b7°b7b14b15y2y3y4y5y6y7y8y9y10y11y15                                                                          | 1401.73 | 40.219  | 288327 | 2 | 701.37  | -1.57  |
| P0A1P0 G3P1_SALTY Glyceraldehyde-3-phohate dehydrogenase | 3  |                   | AGIALNDNFVK                         | 296 | 11 | 18 | 139.32 | b3b4b5b10y1y2y3y4y5°y5°y5y6°y6y7°y7y8y9y11                                                                                       | 1161.62 | 60.916  | 284328 | 2 | 581.31  | -4.62  |

|                                                          |    |                                                      |                              |     |    |    |        |                                                                                                                                    |         |         |        |   |         |        |
|----------------------------------------------------------|----|------------------------------------------------------|------------------------------|-----|----|----|--------|------------------------------------------------------------------------------------------------------------------------------------|---------|---------|--------|---|---------|--------|
| P0A1P0 G3P1_SALTY Glyceraldehyde-3-phohate dehydrogenase | 4  |                                                      | LVSWYDNETGYSNK               | 307 | 14 | 15 | 133.87 | b2b9b12y1y3y4y5y6y8y9y10y11*y11y12y14                                                                                              | 1675.77 | 57.769  | 236017 | 2 | 838.39  | 6.92   |
| P0A1P0 G3P1_SALTY Glyceraldehyde-3-phohate dehydrogenase | 5  |                                                      | VLDLIAHISK                   | 321 | 10 | 4  | 33.72  | y5y6y8y10                                                                                                                          | 1108.66 | 65.758  | 144446 | 2 | 554.84  | -8.26  |
| P0A1P0 G3P1_SALTY Glyceraldehyde-3-phohate dehydrogenase | 6  |                                                      | AATYEQIK                     | 249 | 8  | 9  | 40.68  | b1b8y2y4°y4y5*y5y6y8                                                                                                               | 923.47  | 30.324  | 135531 | 2 | 462.24  | -11.90 |
| P0A1P0 G3P1_SALTY Glyceraldehyde-3-phohate dehydrogenase | 7  |                                                      | VPTPNVSVVDLTVR               | 232 | 14 | 14 | 117.71 | b2b3°b3b5y2y4y5y6y7y8y9y11y12y14                                                                                                   | 1495.85 | 70.316  | 110941 | 2 | 748.43  | -0.08  |
| P0A1P0 G3P1_SALTY Glyceraldehyde-3-phohate dehydrogenase | 8  |                                                      | SDIEIVAINDLLDAEYMAYMLK       | 24  | 22 | 12 | 63.85  | b4b5b7°b7b13°b13y3y5y7y9y11°y11                                                                                                    | 2530.24 | 126.724 | 89777  | 3 | 844.09  | -1.74  |
| P0A1P0 G3P1_SALTY Glyceraldehyde-3-phohate dehydrogenase | 9  |                                                      | LTGMAFR                      | 225 | 7  | 4  | 40.27  | y4y5y6y7                                                                                                                           | 795.41  | 48.821  | 85843  | 2 | 398.21  | -9.90  |
| P0A1P0 G3P1_SALTY Glyceraldehyde-3-phohate dehydrogenase | 10 |                                                      | VVLTGPSKDNTPMFVK             | 116 | 16 | 6  | 34.86  | y5y7*y7y8y13y16                                                                                                                    | 1732.91 | 57.228  | 61170  | 3 | 578.31  | -9.93  |
| P0A1P0 G3P1_SALTY Glyceraldehyde-3-phohate dehydrogenase | 11 |                                                      | VLPELNGK                     | 217 | 8  | 9  | 66.98  | y3*y3y4*y4y5y6*y6y7y8                                                                                                              | 869.50  | 44.195  | 54259  | 2 | 435.25  | -9.41  |
| P0A1P0 G3P1_SALTY Glyceraldehyde-3-phohate dehydrogenase | 12 | Carbamidomethyl+C(12)<br>;Carbamidomethyl+C(16)<br>) | YEQDIVSNASCTTNCLAPLAK        | 138 | 22 | 3  | 13.33  | b7y8y12                                                                                                                            | 2412.09 | 106.358 | 9995   | 3 | 804.70  | -11.94 |
| P0A1P0 G3P1_SALTY Glyceraldehyde-3-phohate dehydrogenase | 13 | Carbamidomethyl+C(18)<br>;Carbamidomethyl+C(22)<br>) | GANFDKYEGQDIVSNASCTTNCLAPLAK | 132 | 28 | 43 | 357.15 | b3b4b5*b5b6b7b8b10*b10b11°b11b12°b12b13°b13*b13b15b16b17b22b23b24*b24b26b27y3y4y5y8y9y10*y10y11y12°y12*y12y13°y13y14y15°y15*y15y16 | 3044.41 | 66.256  | 347363 | 3 | 1015.47 | -0.08  |
| P0A1P0 G3P1_SALTY Glyceraldehyde-3-phohate dehydrogenase | 14 |                                                      | GGRGASQNIIPSSTGAAK           | 195 | 18 | 7  | 32.48  | b6°b6b8y8y9°y9y12                                                                                                                  | 1671.87 | 36.205  | 5656   | 3 | 557.96  | -7.16  |
| P0A1P0 G3P1_SALTY Glyceraldehyde-3-phohate dehydrogenase | 15 |                                                      | RSDIEIVAINDLLDAEYMAYMLK      | 23  | 23 | 3  | 12.95  | b3b16y20                                                                                                                           | 2686.36 | 93.007  | 4623   | 3 | 896.13  | 5.63   |
| P0A1P0 G3P1_SALTY Glyceraldehyde-3-phohate dehydrogenase | 16 |                                                      | YDSTHGRFDGTVEVK              | 46  | 15 | 4  | 26.07  | y8y11°y11y12                                                                                                                       | 1710.83 | 78.069  | 4111   | 3 | 570.95  | 10.77  |
| P0A1P0 G3P1_SALTY Glyceraldehyde-3-phohate dehydrogenase | 17 |                                                      | DLIAHISK                     | 323 | 8  | 0  | 2.05   |                                                                                                                                    | 896.51  | 65.715  | 48521  | 2 | 448.76  | -12.87 |
| P0A1P0 G3P1_SALTY Glyceraldehyde-3-phohate dehydrogenase | 18 |                                                      | LDLIAHISK                    | 322 | 9  | 0  | 2.05   |                                                                                                                                    | 1009.59 | 65.714  | 45747  | 2 | 505.30  | -9.98  |
| P0A1P0 G3P1_SALTY Glyceraldehyde-3-phohate dehydrogenase | 19 |                                                      | AATYEQIK                     | 249 | 8  | 0  | 1.23   |                                                                                                                                    | 905.46  | 30.325  | 52469  | 2 | 453.24  | -5.53  |
| P0A1P0 G3P1_SALTY Glyceraldehyde-3-phohate dehydrogenase | 20 |                                                      | LTGMAFR                      | 225 | 7  | 0  | 0.82   |                                                                                                                                    | 777.40  | 48.822  | 7784   | 2 | 389.20  | -3.85  |
| Q8ZK80 RL9_SALTY 50S ribosomal protein L9                | 1  |                                                      | LADVLAANAR                   | 57  | 11 | 14 | 113.82 | b2b3b4y1y3*y3y4y5*y5y6y7y9y10y11                                                                                                   | 1084.60 | 52.822  | 175936 | 2 | 542.80  | -11.70 |

|                                           |    |                      |                               |     |    |    |        |                                                                    |         |         |        |   |         |        |
|-------------------------------------------|----|----------------------|-------------------------------|-----|----|----|--------|--------------------------------------------------------------------|---------|---------|--------|---|---------|--------|
| Q8ZK80 RL9_SALTY 50S ribosomal protein L9 | 2  |                      | VANLGLGDQVNVK                 | 8   | 14 | 24 | 217.09 | b2b3b4b6b7*b7b9*b9b11b13*b13y3y4y6y7*y7y8y9*y9y10*y10y11y12y14     | 1413.77 | 56.054  | 147601 | 2 | 707.39  | -0.17  |
| Q8ZK80 RL9_SALTY 50S ribosomal protein L9 | 3  |                      | DIADAVTAAGVDVAK               | 97  | 15 | 11 | 91.96  | b2b5b6b8y4y6y7y8y9y10y15                                           | 1415.74 | 65.556  | 97084  | 2 | 708.37  | 0.43   |
| Q8ZK80 RL9_SALTY 50S ribosomal protein L9 | 4  |                      | NVEYFEAR                      | 42  | 8  | 5  | 40.68  | b1y2y4y5y6                                                         | 1027.48 | 46.337  | 81388  | 2 | 514.25  | -1.19  |
| Q8ZK80 RL9_SALTY 50S ribosomal protein L9 | 5  |                      | INALETVTIASK                  | 71  | 12 | 6  | 49.38  | b3y4y9y10y11y12                                                    | 1259.72 | 60.641  | 57335  | 2 | 630.36  | -0.68  |
| Q8ZK80 RL9_SALTY 50S ribosomal protein L9 | 6  |                      | TTGEHEVNFQVHSEVFAK            | 123 | 18 | 3  | 15.45  | b5b7y13                                                            | 2058.96 | 94.159  | 10193  | 3 | 686.99  | -12.69 |
| Q8ZK80 RL9_SALTY 50S ribosomal protein L9 | 7  |                      | AGDEGKLFGSIGTR                | 83  | 14 | 3  | 34.69  | y6y7y8                                                             | 1407.70 | 54.579  | 81798  | 3 | 469.91  | -13.70 |
| P65702 PGK_SALTY Phohoglycerate kinase    | 1  |                      | VLPAVAMLEER                   | 373 | 11 | 15 | 113.03 | b1b2b3y1y2*y2y3y4y5y6y7y8y9y10y11                                  | 1227.67 | 79.521  | 295882 | 2 | 614.34  | -4.67  |
| P65702 PGK_SALTY Phohoglycerate kinase    | 2  | Carbamidomethyl+C(5) | LLTTCDIPVPTDVR                | 244 | 14 | 20 | 159.86 | b2b6*b6b7*b7b9*b9b12b13y1y2y3y5y7y8y9y10y11y12y14                  | 1599.84 | 67.997  | 207114 | 2 | 800.43  | 0.99   |
| P65702 PGK_SALTY Phohoglycerate kinase    | 3  | Carbamidomethyl+C(6) | FADVACAGPLLAELDALGK           | 156 | 20 | 21 | 208.49 | b2b3b4b5b6b7y1y2y3y4y5y6y7y8y9y10y13y14y15y16y20                   | 2002.04 | 98.442  | 193645 | 2 | 1001.52 | 3.90   |
| P65702 PGK_SALTY Phohoglycerate kinase    | 4  |                      | VATEFSETAPATLK                | 258 | 14 | 26 | 173.01 | b1b2b3*b3b4*b4b6*b6b7b9y1y2y3y5*y5y6y7y9*y9y10y11*y11y12*y12y13y14 | 1464.76 | 51.995  | 138452 | 2 | 732.88  | 1.92   |
| P65702 PGK_SALTY Phohoglycerate kinase    | 5  |                      | TILWNGPVGVFEFPNFR             | 302 | 17 | 19 | 115.77 | b4b6b13*b13y4*y4y5y6*y6*y6y7*y7y8*y8y11y12*y12y13y17               | 1993.04 | 105.985 | 124121 | 2 | 997.03  | 5.51   |
| P65702 PGK_SALTY Phohoglycerate kinase    | 6  |                      | SLYEADLVDEAKR                 | 231 | 13 | 11 | 95.26  | b4b5*b5y4y5*y5y6y9y10y11y13                                        | 1508.74 | 53.871  | 122841 | 3 | 503.59  | -11.97 |
| P65702 PGK_SALTY Phohoglycerate kinase    | 7  |                      | ADLNVPVKEGK                   | 19  | 11 | 9  | 52.65  | b3y2y4y6*y6y7y8*y8y11                                              | 1169.65 | 36.344  | 110429 | 2 | 585.33  | 0.63   |
| P65702 PGK_SALTY Phohoglycerate kinase    | 8  |                      | MTDLDLAGKR                    | 5   | 10 | 7  | 70.81  | b2y3y4y5y7y9y10                                                    | 1119.58 | 42.487  | 42316  | 2 | 560.29  | -3.05  |
| P65702 PGK_SALTY Phohoglycerate kinase    | 9  |                      | MTDLDLAGK                     | 5   | 9  | 4  | 30.3   | b6y5y8y9                                                           | 963.48  | 47.843  | 27120  | 2 | 482.24  | -6.27  |
| P65702 PGK_SALTY Phohoglycerate kinase    | 10 |                      | AQASTHGIGK                    | 146 | 10 | 15 | 120.4  | b2*b2b3b4b6b7y1y2y3y4y5y7y8*y8y10                                  | 969.51  | 15.385  | 26881  | 2 | 485.26  | -5.79  |
| P65702 PGK_SALTY Phohoglycerate kinase    | 11 |                      | SVNDVKEDEQILDIGDASAQQLAEILK   | 272 | 27 | 3  | 11.84  | b9b12y13                                                           | 2941.48 | 100.533 | 11448  | 2 | 1471.24 | -7.30  |
| P65702 PGK_SALTY Phohoglycerate kinase    | 12 |                      | ASLPTIELALK                   | 38  | 11 | 3  | 24.13  | b7y6y8                                                             | 1155.69 | 76.616  | 91360  | 2 | 578.35  | -8.45  |
| P65702 PGK_SALTY Phohoglycerate kinase    | 13 |                      | LTVLDSLK                      | 197 | 9  | 3  | 38.08  | y4y6y7                                                             | 975.56  | 61.523  | 82757  | 2 | 488.29  | -7.38  |
| P65702 PGK_SALTY Phohoglycerate kinase    | 14 |                      | IADQLIVGGGIANTFVAAQGHSVGK     | 206 | 25 | 4  | 16.15  | b3b5y4y10                                                          | 2423.29 | 77.538  | 50968  | 3 | 808.44  | -4.03  |
| P65702 PGK_SALTY Phohoglycerate kinase    | 15 |                      | SVNDVK                        | 272 | 6  | 1  | 13.56  | b5                                                                 | 661.35  | 78.125  | 13959  | 1 | 661.35  | -9.51  |
| P65702 PGK_SALTY Phohoglycerate kinase    | 16 |                      | ISYISTGGGAFLEFVEGK            | 355 | 18 | 3  | 15.45  | b3y3y14                                                            | 1874.95 | 102.296 | 1713   | 2 | 937.98  | -2.86  |
| P65702 PGK_SALTY Phohoglycerate kinase    | 17 |                      | LVKDYLDGVDVAEGELVLENVR        | 90  | 23 | 3  | 12.95  | b10y5y15                                                           | 2544.35 | 97.403  | 39384  | 3 | 848.79  | -1.06  |
| P65702 PGK_SALTY Phohoglycerate kinase    | 18 |                      | SVIKMTDLDLAGK                 | 1   | 13 | 3  | 20.48  | b12y7y10                                                           | 1390.78 | 79.132  | 3605   | 2 | 695.89  | 14.66  |
| P65702 PGK_SALTY Phohoglycerate kinase    | 19 | Carbamidomethyl+C(6) | KYAALCDVFVMDAFGTAHR           | 127 | 19 | 4  | 14.82  | b11*b11b15y9                                                       | 2172.03 | 80.369  | 3501   | 4 | 543.76  | -4.27  |
| P65702 PGK_SALTY Phohoglycerate kinase    | 20 |                      | ISYISTGGGAFLEFVEGKVLPAVAMLEER | 355 | 29 | 8  | 35.46  | b7b10b11y7*y7y8*y8y23                                              | 3083.62 | 136.303 | 2869   | 4 | 771.66  | 1.98   |

|                                           |    |                |                         |     |    |    |        |                                                                        |         |         |        |   |         |        |
|-------------------------------------------|----|----------------|-------------------------|-----|----|----|--------|------------------------------------------------------------------------|---------|---------|--------|---|---------|--------|
| P65702 PGK_SALTY Phohoglycerate kinase    | 21 |                | YEADLVDEAKR             | 233 | 11 | 1  | 7.4    | b3                                                                     | 1308.64 | 53.865  | 32371  | 2 | 654.83  | 0.47   |
| P65702 PGK_SALTY Phohoglycerate kinase    | 22 |                | PAVAMLEER               | 375 | 9  | 2  | 18.76  | b3b5                                                                   | 1015.52 | 79.559  | 28164  | 2 | 508.26  | -3.67  |
| P65702 PGK_SALTY Phohoglycerate kinase    | 23 |                | DLNVPVKEGK              | 20  | 10 | 3  | 18.76  | b3b6°b6                                                                | 1098.61 | 36.315  | 21192  | 2 | 549.81  | -7.78  |
| P65702 PGK_SALTY Phohoglycerate kinase    | 24 |                | LNVPVKEGK               | 21  | 9  | 0  | 2.46   |                                                                        | 983.59  | 36.320  | 15337  | 2 | 492.30  | -1.80  |
| P65702 PGK_SALTY Phohoglycerate kinase    | 25 |                | TDLDLAGKR               | 6   | 9  | 1  | 8.21   | b6                                                                     | 988.54  | 42.434  | 13628  | 2 | 494.78  | 0.74   |
| P65702 PGK_SALTY Phohoglycerate kinase    | 26 |                | ASTHGIGK                | 148 | 8  | 7  | 67.8   | b3b4b5°b5b6b7°b7                                                       | 770.41  | 15.389  | 4445   | 2 | 385.71  | -12.12 |
| P0A2A3 RL1_SALTY 50S ribosomal protein L1 | 1  |                | VAVFTQGPNAEAAK          | 74  | 14 | 25 | 158.61 | b5°b5b8b9b11°b11b13b14y1y2y3y4°y4y7y8y9°y9y10°y10y11°y11°y11y12°y12y14 | 1402.73 | 44.619  | 131860 | 2 | 701.87  | 1.04   |
| P0A2A3 RL1_SALTY 50S ribosomal protein L1 | 2  |                | VGTVTPNVAEAVK           | 141 | 13 | 17 | 139.48 | b2b3°b3b4°b4b13y3y5y6y7y8°y8y9y10y11y12y13                             | 1284.72 | 47.457  | 129204 | 2 | 642.86  | -0.57  |
| P0A2A3 RL1_SALTY 50S ribosomal protein L1 | 3  |                | VVGQLGQVLGPR            | 122 | 12 | 9  | 68.55  | b2b4y3y6y7y8y10°y10y12                                                 | 1222.72 | 58.675  | 128556 | 2 | 611.86  | -3.79  |
| P0A2A3 RL1_SALTY 50S ribosomal protein L1 | 4  |                | QYDINEAIALLK            | 19  | 12 | 5  | 26.09  | b4b12y3y4y12                                                           | 1390.76 | 84.732  | 50038  | 2 | 695.88  | -0.44  |
| P0A2A3 RL1_SALTY 50S ribosomal protein L1 | 5  |                | AAGAELVGMEDLADQIK       | 88  | 17 | 9  | 54.84  | b2b7b8y7y10°y10y11y12y17                                               | 1730.87 | 79.033  | 42216  | 2 | 865.94  | 4.87   |
| P0A2A3 RL1_SALTY 50S ribosomal protein L1 | 6  |                | GATVLPHGTR              | 60  | 11 | 5  | 50.29  | y4y5y6y7y11                                                            | 1065.58 | 29.416  | 24208  | 2 | 533.29  | -1.72  |
| P0A2A3 RL1_SALTY 50S ribosomal protein L1 | 7  |                | VSISTTMGAGVAVDQAGLSASAN | 211 | 23 | 3  | 12.95  | b9y16y18                                                               | 2107.01 | 102.421 | 1526   | 2 | 1054.01 | -9.39  |
| P0A2A3 RL1_SALTY 50S ribosomal protein L1 | 8  |                | NGIIHTTIGKVDFDADK       | 167 | 17 | 3  | 24.83  | y4y8y9                                                                 | 1843.98 | 78.314  | 9914   | 2 | 922.49  | 11.19  |
| P0A2A3 RL1_SALTY 50S ribosomal protein L1 | 9  | Oxidation+M(9) | AAGAELVGMEDLADQIK       | 88  | 17 | 4  | 16.18  | b5b13y9°y9                                                             | 1746.88 | 75.878  | 6507   | 2 | 873.94  | 13.84  |
| P0A2A3 RL1_SALTY 50S ribosomal protein L1 | 10 |                | TVLPHGTGR               | 62  | 9  | 0  | 2.46   |                                                                        | 937.51  | 29.416  | 17461  | 2 | 469.26  | -11.78 |
| P0A7W4 RS5_SALTY 30S ribosomal protein S5 | 1  |                | VFMQPASEGTGIIAGGAMR     | 93  | 19 | 20 | 176.1  | b2b3b4b10b12b13b14y4y5y6y7y11y12y13y14y15y16°y16°y16y19                | 1892.94 | 67.528  | 230752 | 2 | 946.97  | 1.93   |
| P0A7W4 RS5_SALTY 30S ribosomal protein S5 | 2  |                | AVLEVAGVHNVLAK          | 112 | 14 | 8  | 75.41  | b4y3y6y9y10y11y12y14                                                   | 1419.84 | 60.536  | 156256 | 2 | 710.42  | 2.41   |
| P0A7W4 RS5_SALTY 30S ribosomal protein S5 | 3  |                | AYGSTNPINVVR            | 126 | 12 | 14 | 109.46 | b2b3b6y2y3y4°y4y6y7y8y9y10°y10y12                                      | 1290.68 | 50.683  | 134453 | 2 | 645.84  | 0.38   |
| P0A7W4 RS5_SALTY 30S ribosomal protein S5 | 4  |                | ATIDGLENMNSPEMVAAK      | 138 | 18 | 22 | 132.93 | b2b4b8b15°b15b16y1y2y3y4y7y10y11y12°y12°y12y13y14°y14y15°y15y18        | 1890.90 | 62.733  | 117758 | 2 | 945.95  | 4.52   |
| P0A7W4 RS5_SALTY 30S ribosomal protein S5 | 5  |                | ATIDGLENMNSPEMVAAKR     | 138 | 19 | 14 | 135.48 | b4b7b11y3y4y5y8y9y10y11y12°y12y16y17                                   | 2046.99 | 58.538  | 70651  | 3 | 683.00  | -2.09  |
| P0A7W4 RS5_SALTY 30S ribosomal protein S5 | 6  |                | IFSFTALTVVGDGNGR        | 29  | 16 | 9  | 68.64  | y6y7°y7y8y9y11°y11y12y16                                               | 1653.86 | 85.867  | 36454  | 2 | 827.43  | -1.85  |
| P0A7W4 RS5_SALTY 30S ribosomal protein S5 | 7  |                | VGFGYGK                 | 45  | 7  | 5  | 40.27  | b1y3y4y6y7                                                             | 727.37  | 39.320  | 21418  | 2 | 364.19  | -7.13  |
| P0A7W4 RS5_SALTY 30S ribosomal protein S5 | 8  |                | MAHIEK                  | 0   | 6  | 1  | 13.56  | y3                                                                     | 728.38  | 65.668  | 6061   | 1 | 728.38  | 7.46   |
| P0A7W4 RS5_SALTY 30S ribosomal protein S5 | 9  |                | MAHIEKQAGELQEK          | 0   | 14 | 4  | 38.51  | y5y6y8y10                                                              | 1611.81 | 110.148 | 2285   | 2 | 806.41  | -3.33  |

|                                             |    |                      |                                   |     |    |    |        |                                                                        |         |         |        |   |         |        |
|---------------------------------------------|----|----------------------|-----------------------------------|-----|----|----|--------|------------------------------------------------------------------------|---------|---------|--------|---|---------|--------|
| P0A7W4 RS5_SALTY 30S ribosomal protein S5   | 10 |                      | LEVAGVHNVLAK                      | 114 | 12 | 1  | 7.3    | b8                                                                     | 1249.71 | 60.609  | 3359   | 3 | 417.24  | -11.92 |
| P0A1D5 CH10_SALTY 10 kDa chaperonin         | 1  |                      | VGDIVIFNDGYGVK                    | 60  | 14 | 26 | 219.45 | b3b4°b4b5°b5b6b10°b10b11°b11°b11b13°b13y1y2y3y4y5y6y7y8y9y10y11y12y14  | 1495.78 | 72.863  | 345143 | 2 | 748.39  | -0.90  |
| P0A1D5 CH10_SALTY 10 kDa chaperonin         | 2  |                      | ILDNGTVQPLDVK                     | 47  | 13 | 26 | 176.58 | b2b4b7°b7b8°b8b10b11°b11b13y2y3y5°y5y6°y6°y6y7y8y9y10y11°y11°y11y12y13 | 1411.78 | 56.861  | 273659 | 2 | 706.39  | -0.69  |
| P0A1D5 CH10_SALTY 10 kDa chaperonin         | 3  |                      | SAGGIVLTGSAAGK                    | 20  | 14 | 18 | 125.78 | b2b3°b3b4b5°b5b10b14y1y2y3y4y6y7y8y9y12y14                             | 1188.65 | 43.120  | 190137 | 2 | 594.83  | -4.21  |
| P0A1D5 CH10_SALTY 10 kDa chaperonin         | 4  |                      | GEIIVGK                           | 37  | 8  | 7  | 53.83  | b2y2y3y4y5y6y8                                                         | 786.47  | 41.080  | 26086  | 2 | 393.74  | -8.54  |
| P0A1D5 CH10_SALTY 10 kDa chaperonin         | 5  |                      | IDNEEVLIMSESILAIVEA               | 77  | 20 | 11 | 54.67  | b7°b7b8°b8°b8b9b10°b10°b10y3y9                                         | 2203.08 | 136.297 | 6116   | 2 | 1102.04 | -10.64 |
| P0A1D5 CH10_SALTY 10 kDa chaperonin         | 6  |                      | MSIRPLHDR                         | 0   | 9  | 3  | 30.3   | b5b8y4                                                                 | 1124.60 | 125.208 | 1546   | 2 | 562.80  | -2.39  |
| P0A1D5 CH10_SALTY 10 kDa chaperonin         | 7  |                      | SEKIDNEEVLIMSESILAIVEA            | 74  | 23 | 5  | 28.64  | b4b5b9b21°b21                                                          | 2547.28 | 136.264 | 8969   | 2 | 1274.14 | 2.01   |
| P0A1D5 CH10_SALTY 10 kDa chaperonin         | 8  |                      | SAGGIVLTGSAAGK                    | 20  | 14 | 0  | 3.7    |                                                                        | 1170.65 | 43.128  | 34802  | 2 | 585.83  | 3.02   |
| P0A297 RL10_SALTY 50S ribosomal protein L10 | 1  |                      | LATLPTYEEAIAR                     | 125 | 13 | 14 | 105.4  | b2b3°b3b9y1y4y6y7y8y9°y9y10y11y13                                      | 1447.78 | 64.580  | 113196 | 2 | 724.39  | -1.52  |
| P0A297 RL10_SALTY 50S ribosomal protein L10 | 2  |                      | AAAFEGELIPASQIDR                  | 109 | 16 | 22 | 138.96 | b1b5b8b9y1y2y3°y3y5°y5y7°y7y8y9y10y11°y11y12y13°y13°y13y16             | 1687.87 | 68.106  | 79202  | 2 | 844.44  | 3.83   |
| P0A297 RL10_SALTY 50S ribosomal protein L10 | 3  |                      | GALSAVVADSR                       | 20  | 11 | 4  | 31.12  | y2y4y5y8                                                               | 1045.56 | 48.169  | 42232  | 2 | 523.29  | -0.23  |
| P0A297 RL10_SALTY 50S ribosomal protein L10 | 4  |                      | DTFVGPTLIAYSMHEPGAAAR             | 73  | 21 | 7  | 30.94  | b3°b3b4°b4b6b11y8                                                      | 2204.09 | 81.967  | 11473  | 3 | 735.37  | 4.32   |
| P0A297 RL10_SALTY 50S ribosomal protein L10 | 5  |                      | LMATMK                            | 138 | 6  | 2  | 26.71  | y4y5                                                                   | 694.35  | 38.421  | 2984   | 1 | 694.35  | -13.01 |
| P0A297 RL10_SALTY 50S ribosomal protein L10 | 6  | Carbamidomethyl+C(9) | VVEGTQFECLK                       | 62  | 11 | 6  | 35.06  | b7b10y5°y5y8°y8                                                        | 1309.62 | 97.390  | 2212   | 1 | 1309.62 | -18.18 |
| P0A297 RL10_SALTY 50S ribosomal protein L10 | 7  |                      | LATLPTYEEAIARLMATMK               | 125 | 19 | 3  | 22.6   | b11b12y6                                                               | 2123.09 | 57.427  | 109244 | 3 | 708.37  | -14.26 |
| P0A297 RL10_SALTY 50S ribosomal protein L10 | 8  | Carbamidomethyl+C(9) | VVEGTQFECLKDTFVGPTLIAYSM EHPGAAAR | 62  | 32 | 3  | 11.11  | b8y6y12                                                                | 3494.68 | 91.730  | 61480  | 4 | 874.43  | -7.06  |
| P0A297 RL10_SALTY 50S ribosomal protein L10 | 9  |                      | AGREAGVYMR                        | 43  | 10 | 4  | 39.88  | b6y5y7y8                                                               | 1109.54 | 87.129  | 2563   | 1 | 1109.54 | -11.44 |
| P0A297 RL10_SALTY 50S ribosomal protein L10 | 10 | Phosphoryl STY(11)   | DTFVGPTLIAYSMHEPGAAAR             | 73  | 21 | 3  | 13.77  | b5b11y10_H3PO4 y10                                                     | 2284.03 | 73.782  | 9786   | 4 | 571.76  | -4.49  |
| P67091 UF_SALTY Universal stress protein F  | 1  |                      | TILVPIDISDSELTQR                  | 3   | 16 | 18 | 139.16 | b1b2°b2b3b4y3y5y6°y6y7y8y9y10y12°y12°y12y14y16                         | 1799.98 | 81.341  | 85116  | 2 | 900.49  | 1.29   |
| P67091 UF_SALTY Universal stress protein F  | 2  |                      | VHFLTVPISLPYYASLGLAYSALP AMDDLK   | 34  | 31 | 4  | 22.71  | y3°y3y4y9                                                              | 3394.74 | 125.695 | 4092   | 3 | 1132.25 | -6.69  |
| P67091 UF_SALTY Universal stress protein F  | 3  |                      | VQAHVAEGSPK                       | 85  | 11 | 7  | 47.42  | b3b8°b8y6°y6y7y9                                                       | 1122.57 | 17.473  | 11431  | 2 | 561.79  | -19.46 |
| P0A1E3 CYSK_SALTY Cysteine synthase A       | 1  |                      | IQGIGAGFIPGNLDLK                  | 226 | 16 | 11 | 59.54  | b2°b2b3b4b9y1y2y7y10y12y14                                             | 1612.90 | 82.855  | 166853 | 2 | 806.96  | -0.83  |
| P0A1E3 CYSK_SALTY Cysteine synthase A       | 2  |                      | LTLTMPETMSIER                     | 87  | 13 | 12 | 102.09 | b5°b5b6b8y6y7y8°y8y9y10y11y13                                          | 1521.77 | 73.270  | 127329 | 2 | 761.39  | 1.85   |
| P0A1E3 CYSK_SALTY Cysteine synthase A       | 3  |                      | YLLQQFSNPANPEIHEK                 | 137 | 18 | 12 | 62.58  | b2b3b4y3°y3y7y8°y8y9y11°y11y18                                         | 2141.09 | 73.498  | 100378 | 3 | 714.37  | -4.90  |



|                                              |    |  |                              |     |    |    |        |                                                               |         |         |        |   |         |        |
|----------------------------------------------|----|--|------------------------------|-----|----|----|--------|---------------------------------------------------------------|---------|---------|--------|---|---------|--------|
| [P0A1E3 CYSK_SALTY Cysteine synthase A       | 4  |  | YLSTALFADLFTEKELQQ           | 305 | 18 | 6  | 15.45  | b2b16y2y7y10y18                                               | 2117.09 | 101.956 | 96039  | 2 | 1059.05 | 6.23   |
| [P0A1E3 CYSK_SALTY Cysteine synthase A       | 5  |  | ALGANLVLTGAK                 | 105 | 13 | 7  | 27.96  | b2y1y2y3y5y6y13                                               | 1256.72 | 60.762  | 50347  | 2 | 628.87  | 2.14   |
| [P0A1E3 CYSK_SALTY Cysteine synthase A       | 6  |  | NIVVILPSSGER                 | 293 | 12 | 9  | 79.36  | b2b3b4y5y6y8y9y10y12                                          | 1283.73 | 63.540  | 44823  | 2 | 642.37  | 0.67   |
| [P0A1E3 CYSK_SALTY Cysteine synthase A       | 7  |  | AEEIVASDPQK                  | 126 | 11 | 11 | 70.57  | b2b3y3y6y7*y7y8y9*y9y11*y11                                   | 1186.59 | 30.742  | 30829  | 2 | 593.80  | -1.85  |
| [P0A1E3 CYSK_SALTY Cysteine synthase A       | 8  |  | VVGITNEEAISTAR               | 246 | 14 | 6  | 42.12  | b3y4y9y10y12*y12                                              | 1459.78 | 48.873  | 29758  | 2 | 730.39  | 3.09   |
| [P0A1E3 CYSK_SALTY Cysteine synthase A       | 9  |  | IGANMIWDAEK                  | 44  | 11 | 3  | 27.14  | b3y7y8                                                        | 1247.62 | 67.515  | 5033   | 2 | 624.32  | 12.13  |
| [P0A1E3 CYSK_SALTY Cysteine synthase A       | 10 |  | GVLKPGVELVEPTSGNTGIALAYVAAAR | 56  | 28 | 4  | 22.19  | b3y6y7y17                                                     | 2753.52 | 81.273  | 3450   | 2 | 1377.27 | 1.42   |
| [P0A1E3 CYSK_SALTY Cysteine synthase A       | 11 |  | LQEDESFTNK                   | 283 | 10 | 4  | 28.49  | b3b10y5y6                                                     | 1210.58 | 53.701  | 2847   | 3 | 404.20  | 13.51  |
| [P0A1E3 CYSK_SALTY Cysteine synthase A       | 12 |  | IGANMIWDAEKR                 | 44  | 12 | 3  | 26.09  | b5y7y8                                                        | 1403.70 | 59.990  | 87970  | 3 | 468.57  | -10.35 |
| [P0A1E3 CYSK_SALTY Cysteine synthase A       | 13 |  | LIDKVVGITNEEAISTAR           | 242 | 18 | 4  | 41.4   | y4y5y12y13                                                    | 1929.08 | 59.999  | 60225  | 2 | 965.04  | 8.73   |
| [P0A1E3 CYSK_SALTY Cysteine synthase A       | 14 |  | GAIQKAEEIVASDPQK             | 121 | 16 | 4  | 23.55  | b14*b14y4y5                                                   | 1683.90 | 90.200  | 56769  | 2 | 842.45  | 4.64   |
| [P0A1E3 CYSK_SALTY Cysteine synthase A       | 15 |  | LQEDESFTNKNIVVILPSSGER       | 283 | 22 | 5  | 24.05  | b3b12*b12b13y6                                                | 2475.28 | 68.897  | 23832  | 3 | 825.76  | 2.66   |
| [P0A1E3 CYSK_SALTY Cysteine synthase A       | 16 |  | IYEDNSLTIGHTPLVRLNR          | 3   | 19 | 3  | 23.99  | b10b11b13                                                     | 2211.19 | 73.815  | 21711  | 3 | 737.73  | 0.22   |
| [P0A1E3 CYSK_SALTY Cysteine synthase A       | 17 |  | SKIYEDNSLTIGHTPLVR           | 1   | 18 | 3  | 24.37  | b7b8b12                                                       | 2043.11 | 117.484 | 11732  | 3 | 681.71  | 12.91  |
| [P41031 CY_SALTY Thiosulfate-binding protein | 1  |  | AYLNWLYSPQAQTIIITHYYR        | 265 | 21 | 13 | 51.07  | b1b2b8b10*b10b13y2y3y4y5y13*y13y21                            | 2664.34 | 93.171  | 118834 | 3 | 888.78  | 5.59   |
| [P41031 CY_SALTY Thiosulfate-binding protein | 2  |  | LPNNSSPFYSTMGFLVR            | 110 | 17 | 11 | 105.08 | b7b8y3y5y6y9y11y13*y13y15y17                                  | 1929.96 | 91.435  | 77318  | 2 | 965.48  | 3.61   |
| [P41031 CY_SALTY Thiosulfate-binding protein | 3  |  | QYEAQGFEVVIPK                | 226 | 13 | 8  | 33.84  | b4b10*b10*b10b12y2y11y13                                      | 1507.78 | 69.304  | 74881  | 2 | 754.40  | 3.16   |
| [P41031 CY_SALTY Thiosulfate-binding protein | 4  |  | ELFAALNPPEQQWAK              | 37  | 16 | 23 | 153.04 | b3*b3b5*b5b6b7*b7b11b12*b12b15y1y2y4*y4y6y8y9*y9y11*y11y12y13 | 1888.97 | 89.299  | 70699  | 2 | 944.99  | 4.07   |
| [P41031 CY_SALTY Thiosulfate-binding protein | 5  |  | VNNPEIMGK                    | 286 | 9  | 9  | 74.52  | b2b3y2y3y4y6y7y8y9                                            | 1001.50 | 35.508  | 70659  | 2 | 501.26  | -4.33  |
| [P41031 CY_SALTY Thiosulfate-binding protein | 6  |  | LIFPNPK                      | 146 | 7  | 8  | 50.41  | b2b5y2y4*y4y5y6y7                                             | 828.49  | 55.587  | 59734  | 2 | 414.75  | -11.12 |
| [P41031 CY_SALTY Thiosulfate-binding protein | 7  |  | NVEVFDTGGR                   | 189 | 10 | 9  | 86.32  | b3b8y4y5y6y7y8*y8y10                                          | 1093.53 | 46.686  | 56234  | 2 | 547.27  | 0.78   |
| [P41031 CY_SALTY Thiosulfate-binding protein | 8  |  | GLGDVLISFESEVNNIR            | 208 | 17 | 4  | 16.18  | b11b15y10y17                                                  | 1861.96 | 106.844 | 13512  | 2 | 931.48  | -4.00  |
| [P41031 CY_SALTY Thiosulfate-binding protein | 9  |  | ADVVTYNQVTDVQILHDK           | 81  | 18 | 3  | 15.45  | b3b10y10                                                      | 2058.04 | 63.310  | 9225   | 3 | 686.68  | -7.35  |
| [P41031 CY_SALTY Thiosulfate-binding protein | 10 |  | FGSWPEVMK                    | 311 | 9  | 3  | 30.3   | b7y3y5                                                        | 1080.52 | 68.348  | 80793  | 2 | 540.76  | -0.34  |
| [P41031 CY_SALTY Thiosulfate-binding protein | 11 |  | GATTTFAER                    | 199 | 9  | 4  | 45.21  | b3y4y5y6                                                      | 953.46  | 30.256  | 24428  | 2 | 477.24  | -4.80  |
| [P41031 CY_SALTY Thiosulfate-binding protein | 12 |  | QSHAGSSK                     | 63  | 8  | 4  | 35.91  | b5y3*y3y6                                                     | 801.38  | 80.091  | 13652  | 1 | 801.38  | -9.82  |
| [P41031 CY_SALTY Thiosulfate-binding protein | 13 |  | TNILAEFPVAWVDKNVQANGTEK      | 239 | 23 | 6  | 38.68  | b3b4b7y7y19y20                                                | 2544.30 | 90.332  | 141585 | 3 | 848.77  | -2.11  |
| [P41031 CY_SALTY Thiosulfate-binding protein | 14 |  | NVEVFDTGGRGATTTFAER          | 189 | 19 | 3  | 14.82  | b4b6y6                                                        | 2027.97 | 56.190  | 15738  | 3 | 676.66  | -4.76  |

|                                                             |    |                      |                                 |     |    |    |        |                                                 |         |         |        |   |         |        |
|-------------------------------------------------------------|----|----------------------|---------------------------------|-----|----|----|--------|-------------------------------------------------|---------|---------|--------|---|---------|--------|
| [P41031 CY_SALTY Thiosulfate-binding protein                | 15 |                      | TSGNARYTYLAAWGAADNADGG DK       | 153 | 24 | 3  | 12.62  | b11y4y15                                        | 2445.11 | 90.104  | 6239   | 2 | 1223.06 | 0.50   |
| [P41031 CY_SALTY Thiosulfate-binding protein                | 16 |                      | YTYLAAWGAADNADGGDKAK            | 159 | 20 | 7  | 46.35  | b12y7y11y12y15*y15y16                           | 2057.99 | 117.893 | 4370   | 3 | 686.67  | 14.83  |
| [P41031 CY_SALTY Thiosulfate-binding protein                | 17 |                      | VNNPEIMGKQADK                   | 286 | 13 | 3  | 20.48  | b4b10y11                                        | 1443.71 | 62.257  | 3114   | 2 | 722.36  | -8.96  |
| [P0A1R8 DBHB_SALTY DNA-binding protein HU-beta              | 1  |                      | IAAGADISK                       | 9   | 9  | 14 | 124.76 | b2b4b6b8y1y2*y2y3y4y5y6y7y8y9                   | 845.46  | 27.556  | 259301 | 2 | 423.23  | -13.86 |
| [P0A1R8 DBHB_SALTY DNA-binding protein HU-beta              | 2  |                      | NPQTGKEITIAAAK                  | 61  | 14 | 12 | 99.35  | b1b7y1y2y3y4y5y6y8y11y13y14                     | 1441.78 | 36.065  | 81977  | 3 | 481.26  | -14.48 |
| [P0A1R8 DBHB_SALTY DNA-binding protein HU-beta              | 3  |                      | EITIAAAK                        | 67  | 8  | 9  | 62.21  | b2b3*b3y2y3y4y5y6y8                             | 816.47  | 37.872  | 58725  | 2 | 408.74  | -14.13 |
| [P0A1R8 DBHB_SALTY DNA-binding protein HU-beta              | 4  |                      | ALDAIIASVTESLKEGDDVALVGF GTFAVK | 23  | 30 | 12 | 75.73  | b2b3b4b5b24y1y6y7y8y9y15y30                     | 3036.61 | 136.200 | 41680  | 3 | 1012.87 | -2.09  |
| [P0A1R8 DBHB_SALTY DNA-binding protein HU-beta              | 5  |                      | ALKDAVN                         | 83  | 7  | 8  | 56.43  | b1b4b6y5*y5y6*y6y7                              | 730.41  | 22.008  | 4368   | 2 | 365.71  | 6.10   |
| [P0A1R8 DBHB_SALTY DNA-binding protein HU-beta              | 6  |                      | SQLEK                           | 3   | 6  | 1  | 13.56  | b4                                              | 717.42  | 49.448  | 20740  | 2 | 359.21  | 6.55   |
| [P0A1R8 DBHB_SALTY DNA-binding protein HU-beta              | 7  |                      | ALDAIIASVTESLKEGDDVALVGF GTFAVK | 23  | 30 | 9  | 66.56  | b3b5y3y4y6y8y9y10y11                            | 3036.60 | 137.425 | 13547  | 3 | 1012.87 | -4.66  |
| [P0A1R8 DBHB_SALTY DNA-binding protein HU-beta              | 8  |                      | AGADISK                         | 11  | 7  | 3  | 38.08  | b3b4b5                                          | 661.35  | 27.566  | 40116  | 1 | 661.35  | -1.38  |
| [P0A1R8 DBHB_SALTY DNA-binding protein HU-beta              | 9  |                      | AAGADISK                        | 10  | 8  | 3  | 23.17  | b3b5°b5                                         | 732.39  | 27.542  | 16962  | 1 | 732.39  | 0.33   |
| [P0A1R8 DBHB_SALTY DNA-binding protein HU-beta              | 10 |                      | GDDVALVGFGTFAVK                 | 38  | 15 | 2  | 22.77  | b9b10                                           | 1495.79 | 136.296 | 2901   | 2 | 748.40  | 4.00   |
| [P0A1R8 DBHB_SALTY DNA-binding protein HU-beta              | 11 |                      | EITIAAAK                        | 67  | 8  | 0  | 1.23   |                                                 | 798.46  | 37.879  | 16505  | 2 | 399.73  | -9.48  |
| [P06202 OPPA_SALTY Periplasmic oligopeptide-binding protein | 1  |                      | AEQQLDKDSAIVPVYYYVNAR           | 494 | 21 | 18 | 130.74 | b4b6b10b11°b11b12°b12y1y3y4y5y6*y6y7y9y10y11y21 | 2442.23 | 72.493  | 99123  | 3 | 814.75  | -1.50  |
| [P06202 OPPA_SALTY Periplasmic oligopeptide-binding protein | 2  |                      | NQGDLPAYSYTPPYTDGAK             | 333 | 19 | 6  | 34.85  | b11y5y9y11y14y19                                | 2057.96 | 58.451  | 64764  | 2 | 1029.49 | 9.13   |
| [P06202 OPPA_SALTY Periplasmic oligopeptide-binding protein | 3  |                      | SGEIDMTYNNMPIELFQK              | 263 | 18 | 13 | 51.41  | b2b3b4b14y1y3y10y11*y11*y11y12*y14y18           | 2130.01 | 85.877  | 50230  | 2 | 1065.51 | 10.43  |
| [P06202 OPPA_SALTY Periplasmic oligopeptide-binding protein | 4  |                      | TVINQVTYLPISSEVTDVNR            | 241 | 20 | 12 | 99.66  | b2b9y3y4y5y6y7y9y11y12y14y20                    | 2248.19 | 76.398  | 44033  | 2 | 1124.60 | 3.04   |
| [P06202 OPPA_SALTY Periplasmic oligopeptide-binding protein | 5  |                      | NLGVNVNLENQEWK                  | 410 | 14 | 11 | 78.42  | b2b12y1y3y4y6y8y11y12*y12y14                    | 1656.84 | 66.292  | 37499  | 2 | 828.92  | 1.25   |
| [P06202 OPPA_SALTY Periplasmic oligopeptide-binding protein | 6  |                      | WSDGTPVTAHDFVYSWQR              | 107 | 18 | 11 | 60.61  | b7b14°b14y4*y4y5*y5y6y7*y7y12                   | 2151.99 | 85.861  | 14320  | 2 | 1076.50 | -0.68  |
| [P06202 OPPA_SALTY Periplasmic oligopeptide-binding protein | 7  | Carbamidomethyl+C(4) | AGWCADYNEPTSLNTMLSDSSN NTAHYK   | 439 | 29 | 5  | 24.93  | b4b6y3y4y10                                     | 3294.41 | 89.554  | 84743  | 3 | 1098.81 | 0.37   |
| [P06202 OPPA_SALTY Periplasmic oligopeptide-binding protein | 8  |                      | LVEPEWFK                        | 352 | 8  | 3  | 40.68  | y3y5y6                                          | 1047.54 | 70.654  | 71758  | 2 | 524.28  | -6.99  |
| [P06202 OPPA_SALTY Periplasmic oligopeptide-binding protein | 9  |                      | LALDR                           | 320 | 5  | 1  | 13.15  | y4                                              | 587.35  | 57.054  | 18400  | 1 | 587.35  | -8.11  |
| [P06202 OPPA_SALTY Periplasmic oligopeptide-binding protein | 10 |                      | ALDDHTFEVTLSEVPYFYK             | 163 | 20 | 3  | 14.26  | b10y6y9                                         | 2371.13 | 58.539  | 7922   | 3 | 791.05  | -8.34  |

|                                                            |    |                       |                                         |     |    |    |        |                                            |         |         |       |   |         |        |
|------------------------------------------------------------|----|-----------------------|-----------------------------------------|-----|----|----|--------|--------------------------------------------|---------|---------|-------|---|---------|--------|
| P06202 OPPA_SALTY Periplasmic oligopeptide-binding protein | 11 |                       | IEGVPE\$NVSR                            | 56  | 11 | 5  | 38.07  | b8b9*b9y4y6                                | 1186.63 | 63.273  | 6915  | 2 | 593.82  | 16.05  |
| P06202 OPPA_SALTY Periplasmic oligopeptide-binding protein | 12 |                       | LADPNTASPYASYLQYGHIANIDD<br>IIAGK       | 125 | 29 | 6  | 24.68  | b3°b3b7°b7b9b13                            | 3091.50 | 132.726 | 4577  | 3 | 1031.17 | -12.08 |
| P06202 OPPA_SALTY Periplasmic oligopeptide-binding protein | 13 |                       | WTQPANIVTNGAYK                          | 204 | 14 | 4  | 26.91  | b4*b4b5b11                                 | 1562.81 | 89.403  | 3101  | 3 | 521.61  | 11.33  |
| P06202 OPPA_SALTY Periplasmic oligopeptide-binding protein | 14 |                       | SNITK                                   | 1   | 5  | 1  | 13.15  | b4                                         | 562.32  | 26.261  | 2240  | 1 | 562.32  | -6.40  |
| P06202 OPPA_SALTY Periplasmic oligopeptide-binding protein | 15 | Carbamidomethyl+C(6)  | VDPYLCTYYYEINNQK                        | 291 | 16 | 5  | 35.16  | b3b5b6y4y12                                | 2082.95 | 83.762  | 1685  | 4 | 521.49  | -1.17  |
| P06202 OPPA_SALTY Periplasmic oligopeptide-binding protein | 16 |                       | FGDKWTQPANIVTNGAYK                      | 200 | 18 | 4  | 15.45  | b8°b8b10y3                                 | 2009.99 | 78.668  | 55886 | 2 | 1005.50 | -8.56  |
| P06202 OPPA_SALTY Periplasmic oligopeptide-binding protein | 17 |                       | TVINQVTYLPISSEVTDVNRYR                  | 241 | 22 | 5  | 20.69  | b8°b8y13y16y19                             | 2567.34 | 76.535  | 53030 | 3 | 856.45  | -3.33  |
| P06202 OPPA_SALTY Periplasmic oligopeptide-binding protein | 18 | Carbamidomethyl+C(13) | EIPNEVRVDPYLCTYYYEINNQK                 | 284 | 23 | 8  | 40.72  | b4b6b9b12b21y7°y7*y7                       | 2920.39 | 75.603  | 29107 | 3 | 974.13  | 2.01   |
| P06202 OPPA_SALTY Periplasmic oligopeptide-binding protein | 19 |                       | KNLGVNVNLENQEWK                         | 409 | 15 | 5  | 29.22  | b10y3y9y10*y10                             | 1784.92 | 54.851  | 15435 | 2 | 892.97  | -2.80  |
| P06202 OPPA_SALTY Periplasmic oligopeptide-binding protein | 20 |                       | VKNQGDLPAYSYTPPYTDGAK                   | 331 | 21 | 3  | 13.77  | b8y7y10                                    | 2285.13 | 54.515  | 14995 | 3 | 762.38  | 9.19   |
| P06202 OPPA_SALTY Periplasmic oligopeptide-binding protein | 21 |                       | NNGSEVQSLDPHKIEGVPE\$NVSR               | 43  | 24 | 4  | 35.3   | b13b14y6y7                                 | 2592.29 | 84.391  | 8682  | 3 | 864.77  | 11.11  |
| P06202 OPPA_SALTY Periplasmic oligopeptide-binding protein | 22 |                       | SAVEKFGDK                               | 195 | 9  | 3  | 30.3   | b4b7y6                                     | 980.49  | 124.224 | 6798  | 1 | 980.49  | -10.33 |
| P06202 OPPA_SALTY Periplasmic oligopeptide-binding protein | 23 |                       | NPQYWDNAKTVINQVTYLPISSEV<br>TDVNR       | 232 | 29 | 8  | 28.71  | b5b13*b13y3y5y6°y6y11                      | 3364.66 | 119.467 | 1944  | 4 | 841.92  | -5.01  |
| P06202 OPPA_SALTY Periplasmic oligopeptide-binding protein | 24 | Phosphoryl STY(13)    | TVINQVTYLPISSEVTDVNR                    | 241 | 20 | 4  | 25.07  | b15y6y7y13                                 | 2328.13 | 82.021  | 3864  | 3 | 776.72  | -3.15  |
| Q7CR87 SURA_SALTY Chaperone surA                           | 1  |                       | IQELPGIFAQALSTAK                        | 235 | 16 | 10 | 30.58  | b1b2*b2b3°b3b4*b4y1y12<br>y14              | 1686.94 | 89.365  | 40148 | 2 | 843.98  | 0.14   |
| Q7CR87 SURA_SALTY Chaperone surA                           | 2  |                       | LNAGQAGQQLPDDATLR                       | 50  | 17 | 14 | 101.24 | b7b9y4y7°y7y8y9y11°y11*<br>y11y12y13y14y17 | 1767.91 | 50.249  | 34681 | 2 | 884.46  | 6.84   |
| Q7CR87 SURA_SALTY Chaperone surA                           | 3  |                       | LAYDGLNYSTYR                            | 117 | 12 | 6  | 31.95  | b4b9y2y8y10y12                             | 1435.70 | 58.127  | 30231 | 2 | 718.35  | 8.50   |
| Q7CR87 SURA_SALTY Chaperone surA                           | 4  |                       | ITDEQLDQAIAIAK                          | 90  | 15 | 5  | 25.58  | b6b13y2y5y8                                | 1642.87 | 79.649  | 30065 | 2 | 821.94  | 3.64   |
| Q7CR87 SURA_SALTY Chaperone surA                           | 5  |                       | ITVLPQEVDALAK                           | 149 | 13 | 11 | 45.81  | b2b3°b3b4y1y2y3y9°y9y10<br>y13             | 1396.81 | 70.087  | 28149 | 2 | 698.91  | 0.44   |
| Q7CR87 SURA_SALTY Chaperone surA                           | 6  |                       | QIGTQNDASTELNLSHILIALPENP<br>TSEQVNDAQR | 162 | 35 | 9  | 27.28  | b3b4b6°b6y6y12°y12y14y3<br>5               | 3816.90 | 88.020  | 19866 | 3 | 1272.97 | 0.83   |
| Q7CR87 SURA_SALTY Chaperone surA                           | 7  |                       | GQSQSISVTEVHAR                          | 274 | 14 | 6  | 58.28  | b8y3y5y8y9y10                              | 1498.75 | 36.432  | 14695 | 3 | 500.25  | -7.33  |
| Q7CR87 SURA_SALTY Chaperone surA                           | 8  |                       | LIMDQIILQMGQK                           | 73  | 13 | 3  | 27.96  | y4y5y11                                    | 1530.82 | 87.528  | 2766  | 3 | 510.95  | -9.65  |

|                                                |    |                 |                               |     |    |    |        |                                                        |         |         |        |   |         |        |
|------------------------------------------------|----|-----------------|-------------------------------|-----|----|----|--------|--------------------------------------------------------|---------|---------|--------|---|---------|--------|
| Q7CR87 SURA_SALTY Chaperone surA               | 9  |                 | GQISAPVHSSFGWHLIELLDTR        | 362 | 22 | 5  | 28.71  | b4b13b14y3y6                                           | 2463.26 | 99.819  | 2446   | 3 | 821.76  | -6.54  |
| Q7CR87 SURA_SALTY Chaperone surA               | 10 |                 | QAESIVEEAR                    | 197 | 10 | 3  | 28.49  | b6b7y6                                                 | 1131.59 | 71.353  | 26543  | 2 | 566.30  | 19.85  |
| Q7CR87 SURA_SALTY Chaperone surA               | 11 |                 | VAAVVNNGVVLESDVDGLMQSV<br>K   | 27  | 23 | 4  | 12.95  | b4y7*y7y9                                              | 2343.18 | 90.293  | 24414  | 3 | 781.73  | -17.82 |
| Q7CR87 SURA_SALTY Chaperone surA               | 12 |                 | LAITYSADQQALKGGQMGWGR         | 214 | 21 | 6  | 29.51  | b8°b8b15y8y18y19                                       | 2251.12 | 64.774  | 23689  | 3 | 751.05  | -2.82  |
| Q7CR87 SURA_SALTY Chaperone surA               | 13 |                 | SRLAYDGLNYSTYR                | 115 | 14 | 3  | 19.13  | b7y4y11                                                | 1678.81 | 66.313  | 9955   | 2 | 839.91  | -6.98  |
| Q7CR87 SURA_SALTY Chaperone surA               | 14 |                 | NGADFGKLAITYSADQQALK          | 207 | 20 | 5  | 14.26  | b14y6°y6y9°y9                                          | 2111.06 | 84.649  | 9760   | 4 | 528.52  | -9.37  |
| Q7CR87 SURA_SALTY Chaperone surA               | 15 |                 | LNAGQAGQQLPDDATLRHQILER       | 50  | 23 | 4  | 28.64  | b3b6b9b15                                              | 2544.34 | 102.617 | 2935   | 3 | 848.78  | 3.93   |
| Q7CR87 SURA_SALTY Chaperone surA               | 16 |                 | EMIIEVRNNEVR                  | 134 | 13 | 3  | 29.72  | b4b9b12                                                | 1588.81 | 85.045  | 1855   | 3 | 530.27  | -0.77  |
| Q7CR87 SURA_SALTY Chaperone surA               | 17 | Oxidation+M(19) | VAAVVNNGVVLESDVDGLMQSV<br>K   | 27  | 23 | 3  | 12.95  | b3y7y13                                                | 2359.19 | 114.768 | 4420   | 3 | 787.07  | -10.45 |
| Q7CR87 SURA_SALTY Chaperone surA               | 18 |                 | GQSQSISVTEVHAR                | 274 | 14 | 0  | 3.7    |                                                        | 1481.73 | 36.335  | 1947   | 3 | 494.58  | -1.48  |
| P66313 RL6_SALTY 50S ribosomal<br>protein L6   | 1  |                 | APVVVPAGVDVK                  | 6   | 12 | 13 | 114.23 | b2b3b4b5y1y2y3y5y7y8y9<br>y10y12                       | 1150.68 | 52.815  | 124143 | 2 | 575.84  | -4.99  |
| P66313 RL6_SALTY 50S ribosomal<br>protein L6   | 2  |                 | TLNDAVEVK                     | 35  | 9  | 10 | 54.24  | b2°b2y2y3°y3y6°y6y7y8y9                                | 988.52  | 37.886  | 96533  | 2 | 494.77  | -7.66  |
| P66313 RL6_SALTY 50S ribosomal<br>protein L6   | 3  |                 | INGQVITIK                     | 18  | 9  | 10 | 64.38  | b2°b2b3y2y3y4y7y8*y8y9                                 | 985.60  | 48.018  | 68178  | 2 | 493.30  | -5.76  |
| P66313 RL6_SALTY 50S ribosomal<br>protein L6   | 4  |                 | DGYADGWAQAGTAR                | 55  | 14 | 10 | 58.28  | b3y1y4°y4y6y7y9*y9y10y1<br>4                           | 1438.64 | 49.083  | 65390  | 2 | 719.82  | 1.02   |
| P66313 RL6_SALTY 50S ribosomal<br>protein L6   | 5  |                 | HADNALTFGPR                   | 44  | 11 | 8  | 64.55  | b1b3°b3b5b7y4y5y9                                      | 1198.59 | 46.887  | 53542  | 2 | 599.80  | -2.14  |
| P66313 RL6_SALTY 50S ribosomal<br>protein L6   | 6  |                 | ALLNSMVIGVTEGFTK              | 69  | 16 | 4  | 24.72  | y3y6°y6y8                                              | 1679.90 | 94.088  | 56077  | 2 | 840.45  | -0.94  |
| P66313 RL6_SALTY 50S ribosomal<br>protein L6   | 7  |                 | GADKQVIGQVAADLR               | 134 | 15 | 3  | 17.99  | b5y5y7                                                 | 1540.84 | 59.933  | 36747  | 2 | 770.93  | 0.40   |
| P66313 RL6_SALTY 50S ribosomal<br>protein L6   | 8  |                 | GKNGELTR                      | 27  | 8  | 5  | 35.91  | b7y3y6°y6*y6                                           | 874.47  | 54.652  | 9958   | 2 | 437.74  | -0.28  |
| P66313 RL6_SALTY 50S ribosomal<br>protein L6   | 9  |                 | HADNALTFGPRDGYADGWAQAG<br>TAR | 44  | 25 | 5  | 22.51  | b9b11b13y5y11                                          | 2618.24 | 89.199  | 2086   | 4 | 655.31  | 9.32   |
| P67904 RS10_SALTY 30S ribosomal<br>protein S10 | 1  |                 | LIDQSTAEIVETAKR               | 16  | 15 | 12 | 119.44 | b2y1y4y5y6y7y8y9y10y11<br>y13y15                       | 1673.89 | 51.800  | 137440 | 3 | 558.63  | -12.11 |
| P67904 RS10_SALTY 30S ribosomal<br>protein S10 | 2  |                 | LIDQSTAEIVETAK                | 16  | 14 | 11 | 99.35  | b2b10y3y5y7y8y9y10y12*<br>y12y14                       | 1517.81 | 54.913  | 102171 | 2 | 759.41  | 0.08   |
| P67904 RS10_SALTY 30S ribosomal<br>protein S10 | 3  |                 | LVDIVEPTEK                    | 72  | 10 | 9  | 87.11  | b2b3y3y4y5y6y8y9y10                                    | 1142.63 | 51.280  | 50052  | 2 | 571.82  | -2.99  |
| P67904 RS10_SALTY 30S ribosomal<br>protein S10 | 4  |                 | LDLAAGVDVQISLG                | 89  | 14 | 7  | 30.52  | b6b8°b8b9°b9y7*y7                                      | 1370.74 | 80.033  | 27971  | 2 | 685.87  | -8.55  |
| P67904 RS10_SALTY 30S ribosomal<br>protein S10 | 5  |                 | FTVLISPHVNK                   | 48  | 11 | 3  | 24.13  | b7y5y7                                                 | 1254.70 | 58.502  | 22100  | 3 | 418.91  | -12.74 |
| P67904 RS10_SALTY 30S ribosomal<br>protein S10 | 6  |                 | RLVDIVEPTEK                   | 71  | 11 | 4  | 36.49  | b3b4b10y7                                              | 1298.73 | 51.483  | 47952  | 2 | 649.87  | -0.09  |
| P67904 RS10_SALTY 30S ribosomal<br>protein S10 | 7  |                 | DARDQYEIR                     | 59  | 9  | 9  | 61.37  | b3°b3y4y5°y5y6y7°y7*y7                                 | 1165.55 | 136.277 | 1955   | 1 | 1165.55 | -10.89 |
| P67904 RS10_SALTY 30S ribosomal<br>protein S10 | 8  |                 | LIDQSTAEIVE                   | 16  | 11 | 0  | 3.7    |                                                        | 1217.61 | 54.974  | 4438   | 2 | 609.31  | -12.83 |
| P0AA28 THIO_SALTY Thioredoxin-1                | 1  |                 | MIAPILDEIADEYQGK              | 37  | 16 | 18 | 142.77 | b2b3b13y2y3*y3y5°y5y6y7<br>y8*y8y10y11y13y14y15y1<br>6 | 1805.91 | 92.999  | 214342 | 2 | 903.46  | 5.41   |

|                                                                         |    |                      |                                |     |    |    |        |                                                                            |         |         |        |   |         |        |
|-------------------------------------------------------------------------|----|----------------------|--------------------------------|-----|----|----|--------|----------------------------------------------------------------------------|---------|---------|--------|---|---------|--------|
| P0AA28 THIO_SALTY Thioredoxin-1                                         | 2  |                      | LNIDQNPGETAPK                  | 58  | 12 | 28 | 178.59 | b2*b2b3b4*b4*b4b6*b6*b6b7b10b11y2y3y6*y6y7*y7y8*y8*y8y9*y9*y9y10*y10y11y12 | 1267.66 | 37.879  | 161072 | 2 | 634.33  | -4.62  |
| P0AA28 THIO_SALTY Thioredoxin-1                                         | 3  |                      | GIPTLLLLFK                     | 74  | 9  | 10 | 74.52  | b2b3y1y2y3y4y5y6y7y9                                                       | 1001.63 | 90.444  | 90148  | 2 | 501.32  | -12.37 |
| P0AA28 THIO_SALTY Thioredoxin-1                                         | 4  |                      | MIAPILDEIADEYQGKLTVAK          | 37  | 21 | 9  | 69.35  | b3b4b11y7y11y12y15y18y19                                                   | 2318.22 | 94.162  | 121983 | 3 | 773.41  | -4.74  |
| P02910 HISJ_SALTY Histidine-binding periplasmic protein                 | 1  |                      | VGVLQGTQTETFGNEHWAPK           | 135 | 20 | 11 | 59.8   | b2b3b4y2y3y9y10*y10y11y17y20                                               | 2199.07 | 63.203  | 150443 | 3 | 733.70  | -3.77  |
| P02910 HISJ_SALTY Histidine-binding periplasmic protein                 | 2  |                      | IGTDPTYAPFESK                  | 29  | 13 | 14 | 139.48 | b4b5*b5y3y5y6y7y8y9*y9y10y11y12y13                                         | 1425.69 | 54.749  | 98703  | 2 | 713.35  | -1.20  |
| P02910 HISJ_SALTY Histidine-binding periplasmic protein                 | 3  |                      | NSDIQPTVASLK                   | 120 | 12 | 17 | 97.28  | b1b2*b2*b2b3*b3*b3b4*b4y3y4y7y8*y8y9y10y12                                 | 1272.68 | 47.540  | 77769  | 2 | 636.84  | -0.19  |
| P02910 HISJ_SALTY Histidine-binding periplasmic protein                 | 4  | Carbamidomethyl+C(5) | INTQCTFVENPLDALIPSLK           | 62  | 20 | 16 | 99.49  | b2b3*b3b4*b4b9b10b12b13b16*b16y2y4y5y6y20                                  | 2273.20 | 103.227 | 63945  | 2 | 1137.10 | 6.23   |
| P02910 HISJ_SALTY Histidine-binding periplasmic protein                 | 5  |                      | FGGPAVKDEK                     | 201 | 10 | 6  | 54.65  | b2y1y3y5y6y9                                                               | 1047.54 | 26.343  | 21332  | 2 | 524.27  | -6.06  |
| P02910 HISJ_SALTY Histidine-binding periplasmic protein                 | 6  |                      | GIEIVSYQGQDNIYSDLTAGR          | 155 | 21 | 4  | 13.77  | b11y3y8y21                                                                 | 2299.13 | 77.899  | 10674  | 2 | 1150.07 | 4.67   |
| P02910 HISJ_SALTY Histidine-binding periplasmic protein                 | 7  |                      | LFGVGTGMGLR                    | 211 | 11 | 3  | 27.14  | b3y7y8                                                                     | 1107.59 | 72.341  | 35591  | 2 | 554.30  | -3.53  |
| P02910 HISJ_SALTY Histidine-binding periplasmic protein                 | 8  |                      | AFAEMR                         | 234 | 6  | 1  | 13.56  | b3                                                                         | 724.35  | 35.875  | 8672   | 1 | 724.35  | 5.06   |
| P02910 HISJ_SALTY Histidine-binding periplasmic protein                 | 9  | Carbamidomethyl+C(5) | INTQCTFVENPLDALIPSLKAK         | 62  | 22 | 6  | 13.33  | b4*b4b14*b14y20*y20                                                        | 2472.32 | 98.084  | 159894 | 3 | 824.78  | 1.68   |
| P02910 HISJ_SALTY Histidine-binding periplasmic protein                 | 10 |                      | IRIGTDPTYAPFESK                | 27  | 15 | 4  | 31.6   | b12b13y4y6                                                                 | 1694.87 | 125.716 | 7848   | 2 | 847.94  | 0.00   |
| P02910 HISJ_SALTY Histidine-binding periplasmic protein                 | 11 |                      | QQEIAFTDKLYAADSR               | 99  | 16 | 7  | 44.19  | b10*b10b11b12*b12y3y12                                                     | 1855.91 | 112.684 | 1783   | 2 | 928.46  | -6.31  |
| P02910 HISJ_SALTY Histidine-binding periplasmic protein                 | 12 | Oxidation+M(8)       | LFGVGTGMGLR                    | 211 | 11 | 3  | 24.13  | b5b7y7                                                                     | 1123.59 | 38.196  | 4910   | 3 | 375.20  | -3.59  |
| P0A283 PTGA_SALTY Glucose-ecific phohottransferase enzyme IIA component | 1  |                      | STLTPVVISNMDEIKELIK            | 133 | 19 | 11 | 46.56  | b2*b2b3*b3b4*b4y3y11y12y15y19                                              | 2130.15 | 92.493  | 360059 | 3 | 710.72  | -9.40  |
| P0A283 PTGA_SALTY Glucose-ecific phohottransferase enzyme IIA component | 2  |                      | MVAPVDGTIGK                    | 59  | 11 | 12 | 110.81 | b2b3b8y2y3y5y6y7y8y9y10y11                                                 | 1087.58 | 45.537  | 165088 | 2 | 544.29  | -2.92  |
| P0A283 PTGA_SALTY Glucose-ecific phohottransferase enzyme IIA component | 3  |                      | VGDPIVIEFDLPLEEK               | 115 | 16 | 17 | 122.93 | b1b2b3b4*b4b5b6b7y2y4y6y9y10*y10y11y13y16                                  | 1812.97 | 98.949  | 138114 | 2 | 906.99  | 3.91   |
| P0A283 PTGA_SALTY Glucose-ecific phohottransferase enzyme IIA component | 4  |                      | LSGSVTVGETPVIR                 | 152 | 14 | 4  | 31.31  | b4y4y7y9                                                                   | 1414.79 | 54.919  | 20520  | 2 | 707.90  | -0.52  |
| P0A283 PTGA_SALTY Glucose-ecific phohottransferase enzyme IIA component | 5  |                      | DTGTIEIVAPLSGEIVNIEDVPDVVFAEK  | 16  | 29 | 4  | 14.39  | b8b15y8y11                                                                 | 3069.60 | 110.791 | 5730   | 3 | 1023.87 | 2.70   |
| P0A283 PTGA_SALTY Glucose-ecific phohottransferase enzyme IIA component | 6  |                      | IVGDGIAIKPTGNK                 | 45  | 14 | 13 | 142.32 | b4b5y3y5*y5*y5y6y7y8y9y10y11y13                                            | 1382.78 | 43.114  | 262302 | 3 | 461.60  | -17.66 |
| P0A283 PTGA_SALTY Glucose-ecific phohottransferase enzyme IIA component | 7  |                      | IFETNHAFSIESDSGIELFVHFGIDTVELK | 70  | 30 | 3  | 22.67  | b6b7b16                                                                    | 3394.68 | 78.153  | 6321   | 4 | 849.43  | -0.58  |
| P0A283 PTGA_SALTY Glucose-ecific phohottransferase enzyme IIA component | 8  |                      | VKVGDPIVIEFDLPLEEK             | 113 | 18 | 9  | 52.16  | b7b11*b11y3*y3y4y6y8y10                                                    | 2040.11 | 95.441  | 152053 | 3 | 680.71  | -8.56  |

|                                                                        |    |                       |                                   |     |    |    |        |                                                                             |         |         |        |   |         |        |
|------------------------------------------------------------------------|----|-----------------------|-----------------------------------|-----|----|----|--------|-----------------------------------------------------------------------------|---------|---------|--------|---|---------|--------|
| P0A283 PTGA_SALTY Glucose-ecific phohotransferase enzyme IIA component | 9  |                       | PVDGTIGK                          | 62  | 8  | 4  | 35.89  | b3b4b5°b5                                                                   | 786.43  | 45.543  | 2748   | 1 | 786.43  | -11.33 |
| Q7CR64 YAEH_SALTY UPF0325 protein yaeH                                 | 1  | Carbamidomethyl+C(10) | YVIDELDQICQR                      | 77  | 12 | 8  | 59.22  | b2b9b11y3y8y9y10y12                                                         | 1551.76 | 67.633  | 27210  | 2 | 776.38  | 8.02   |
| Q7CR64 YAEH_SALTY UPF0325 protein yaeH                                 | 2  |                       | TVVADGIGQGYKEVQEISPNLR            | 55  | 22 | 11 | 32.72  | b1b2b4b9b11y4*y4y7*y7y8°y9                                                  | 2373.24 | 71.364  | 25265  | 3 | 791.75  | -2.16  |
| Q7CR64 YAEH_SALTY UPF0325 protein yaeH                                 | 3  | Carbamidomethyl+C(10) | YVIDELDQICQRDR                    | 77  | 14 | 6  | 46.52  | b5b10y9*y9y10y11                                                            | 1822.85 | 54.772  | 9201   | 2 | 911.93  | -11.72 |
| Q7CR64 YAEH_SALTY UPF0325 protein yaeH                                 | 4  |                       | ISEIEADLDK                        | 114 | 10 | 4  | 41.5   | y4y7y9y10                                                                   | 1132.56 | 50.723  | 7611   | 2 | 566.79  | -8.51  |
| Q7CR64 YAEH_SALTY UPF0325 protein yaeH                                 | 5  |                       | TVVADGIGQGYK                      | 55  | 12 | 7  | 43.85  | b8b11y4y8°y8*y8y9                                                           | 1207.62 | 31.138  | 78340  | 2 | 604.31  | -7.78  |
| Q7CR64 YAEH_SALTY UPF0325 protein yaeH                                 | 6  |                       | MYDNLK                            | 0   | 6  | 1  | 13.56  | y5                                                                          | 783.37  | 32.760  | 6217   | 2 | 392.19  | -7.09  |
| Q7CR64 YAEH_SALTY UPF0325 protein yaeH                                 | 7  | Carbamidomethyl+C(10) | YVIDELDQICQRDR                    | 77  | 14 | 3  | 19.13  | b6b9y9                                                                      | 1822.87 | 53.491  | 6477   | 4 | 456.47  | -3.55  |
| Q7CR64 YAEH_SALTY UPF0325 protein yaeH                                 | 8  | Carbamidomethyl+C(7)  | DELDQICQRDR                       | 80  | 11 | 1  | 7.3    | b9                                                                          | 1447.68 | 54.737  | 7848   | 2 | 724.34  | 13.58  |
| P25077 MDH_SALTY Malate dehydrogenase                                  | 1  | Carbamidomethyl+C(2)  | ACVGIITNPVNTTVAIAAEVLKK           | 111 | 23 | 14 | 93.11  | b2b3b4b5b6b8*b8y3y4y15y16y18y20y23                                          | 2382.34 | 104.565 | 189607 | 3 | 794.78  | -2.87  |
| P25077 MDH_SALTY Malate dehydrogenase                                  | 2  |                       | NQLPSGSELSLYDIAPVTPGVAVDLSHIPTAVK | 21  | 33 | 26 | 94.42  | b1*b1b2*b2b3*b3b7°b7b10*b10b12°b12b13*b13b15°b15b32y1y5y6y15y18y19y30y31y33 | 3388.80 | 93.180  | 180150 | 3 | 1130.27 | 0.65   |
| P25077 MDH_SALTY Malate dehydrogenase                                  | 3  |                       | VAVLGAAGGIGQALALLK                | 2   | 19 | 17 | 153.41 | b3b5b6b7b9b10y2y3y4y5y6y9y11y12y13y15y19                                    | 1735.09 | 119.607 | 153025 | 2 | 868.05  | 1.41   |
| P25077 MDH_SALTY Malate dehydrogenase                                  | 4  |                       | FFSQPLLLGK                        | 262 | 10 | 7  | 54.65  | b2y2y3y4y6y8y10                                                             | 1149.66 | 75.377  | 124112 | 2 | 575.33  | -6.26  |
| P25077 MDH_SALTY Malate dehydrogenase                                  | 5  |                       | IQNAGTEVVEAK                      | 205 | 12 | 22 | 147.65 | b2b3b10b11y1y3°y3y4°y4y5y6y7y8y9y10°y10*y10y11°y11*y11y12*y12               | 1258.66 | 33.908  | 121578 | 2 | 629.83  | -3.10  |
| P25077 MDH_SALTY Malate dehydrogenase                                  | 6  |                       | DIQLGEDFINK                       | 301 | 11 | 8  | 41.08  | b3b4y2y8°y8y9°y9y11                                                         | 1291.65 | 67.231  | 76875  | 2 | 646.33  | -3.12  |
| P25077 MDH_SALTY Malate dehydrogenase                                  | 7  |                       | AGGGSATLSMGQAAAR                  | 217 | 16 | 9  | 83.55  | y5y7y8y9y10°y10y11y12y16                                                    | 1405.69 | 39.343  | 68001  | 2 | 703.35  | 0.87   |
| P25077 MDH_SALTY Malate dehydrogenase                                  | 8  |                       | FGLSLVR                           | 233 | 7  | 6  | 53.42  | b2y3y4y5y6y7                                                                | 791.47  | 66.753  | 64049  | 2 | 396.24  | -14.57 |
| P25077 MDH_SALTY Malate dehydrogenase                                  | 9  |                       | SDLFNVNAGIVK                      | 87  | 12 | 6  | 26.09  | b1b2b3b4y8y12                                                               | 1276.69 | 69.251  | 37146  | 2 | 638.85  | -1.05  |
| P25077 MDH_SALTY Malate dehydrogenase                                  | 10 |                       | SIGTLSAFEQHSLDAMLDTLKK            | 279 | 22 | 4  | 23.21  | b11b12b14°b14                                                               | 2405.25 | 85.134  | 35588  | 3 | 802.42  | 6.09   |
| P25077 MDH_SALTY Malate dehydrogenase                                  | 11 | Carbamidomethyl+C(5)  | GVVECAYVEGDGQYAR                  | 246 | 16 | 3  | 25.39  | y3y5y6                                                                      | 1772.81 | 49.205  | 3568   | 2 | 886.91  | 8.33   |
| P25077 MDH_SALTY Malate dehydrogenase                                  | 12 |                       | RIQNAGTEVVEAK                     | 204 | 13 | 7  | 50     | b7°b7b8b10*b10b11y8                                                         | 1414.78 | 71.451  | 7188   | 2 | 707.90  | 13.46  |
| P0A7K0 RL11_SALTY 50S ribosomal protein L11                            | 1  |                       | AQLQEIAQTK                        | 103 | 10 | 16 | 120.4  | b2*b2b3*b3b6b8y2y3°y3*y3y4y5y6y8y9y10                                       | 1129.62 | 38.362  | 174997 | 2 | 565.31  | -5.51  |
| P0A7K0 RL11_SALTY 50S ribosomal protein L11                            | 2  |                       | AADMTGADIEAMTR                    | 113 | 14 | 12 | 93.84  | b3b4°b4y2y3y4°y4y6y7y9y10y14                                                | 1452.65 | 56.898  | 91803  | 2 | 726.83  | 4.71   |
| P0A7K0 RL11_SALTY 50S ribosomal protein L11                            | 3  |                       | TPPAAVLLK                         | 72  | 9  | 6  | 30.3   | b2b3y2y5y7y9                                                                | 909.57  | 53.965  | 84215  | 2 | 455.29  | -9.13  |
| P0A7K0 RL11_SALTY 50S ribosomal protein L11                            | 4  | Carbamidomethyl+C(29) | LQVAAGMANPSPVGPALGQQGVNIMEFCK     | 10  | 30 | 8  | 29.73  | b3b8b11*b11y8*y8y9°y9                                                       | 3081.56 | 95.365  | 3913   | 4 | 771.15  | 9.35   |

|                                             |    |                                          |                                   |     |    |    |        |                                                                   |         |         |        |   |         |        |
|---------------------------------------------|----|------------------------------------------|-----------------------------------|-----|----|----|--------|-------------------------------------------------------------------|---------|---------|--------|---|---------|--------|
| P0A7K0 RL11_SALTY 50S ribosomal protein L11 | 5  | Carbamidomethyl+C(29)<br>;Oxidation+M(7) | LQVAAGMANPSPVGPALGQQG<br>VNIMEFCK | 10  | 30 | 7  | 29.64  | b7*b7b8b16y8y13y25                                                | 3097.52 | 132.678 | 2872   | 3 | 1033.18 | -2.92  |
| P66593 RS6_SALTY 30S ribosomal protein S6   | 1  |                                          | YSAAITGAEGK                       | 24  | 11 | 16 | 100.67 | b3b4b11*b11y1y2y3*y3y5y<br>6y7y9*y9y10*y10y11                     | 1067.53 | 32.730  | 136573 | 2 | 534.27  | -6.75  |
| P66593 RS6_SALTY 30S ribosomal protein S6   | 2  |                                          | AHYVLMNVEAPQEVIDELETFR            | 56  | 23 | 10 | 93.88  | b4b5b11y3y4y5y6y11y12y<br>13                                      | 2704.32 | 112.571 | 111632 | 3 | 902.11  | -2.44  |
| P66593 RS6_SALTY 30S ribosomal protein S6   | 3  |                                          | FNDAVIR                           | 79  | 7  | 4  | 40.27  | y3y4y6y7                                                          | 834.44  | 41.898  | 84977  | 2 | 417.72  | -12.00 |
| P66593 RS6_SALTY 30S ribosomal protein S6   | 4  |                                          | HAVTEASPMVK                       | 93  | 11 | 4  | 31.12  | y6y8y9*y9                                                         | 1169.60 | 30.842  | 58592  | 2 | 585.30  | -1.15  |
| P66593 RS6_SALTY 30S ribosomal protein S6   | 5  |                                          | SMVMR                             | 86  | 5  | 1  | 13.15  | y3                                                                | 623.30  | 26.157  | 5018   | 1 | 623.30  | 2.15   |
| P66038 RISB_SALTY 6                         | 1  |                                          | IGQVKDDNITVVWVPGAYELPLA<br>TEALAK | 40  | 29 | 11 | 42.53  | b3b4*b4b11*b11b12b14y2<br>y9y15y29                                | 3110.68 | 97.911  | 104393 | 3 | 1037.56 | -0.39  |
| P66038 RISB_SALTY 6                         | 2  |                                          | FNQFINDSLLDGAVDALTR               | 21  | 19 | 19 | 119.39 | b2*b2b12b13*b13b14<br>*b14y2y4y5y6y8y9y10y13y<br>14*y14y19        | 2109.08 | 101.069 | 64950  | 2 | 1055.04 | 6.71   |
| P66038 RISB_SALTY 6                         | 3  |                                          | GAEAALTALEMINVLK                  | 136 | 16 | 5  | 28.13  | b6*b6b7b12y4                                                      | 1643.90 | 102.806 | 23135  | 2 | 822.45  | -2.45  |
| P66038 RISB_SALTY 6                         | 4  |                                          | VAITIR                            | 14  | 7  | 4  | 40.27  | y3y4y6y7                                                          | 743.47  | 43.734  | 10619  | 2 | 372.24  | -13.63 |
| P66038 RISB_SALTY 6                         | 5  |                                          | ANVAAPDAR                         | 5   | 9  | 3  | 30.3   | b8y3y8                                                            | 884.44  | 59.162  | 14570  | 2 | 442.73  | -16.63 |
| P66038 RISB_SALTY 6                         | 6  |                                          | DDNITVVWVPGAYELPLATEALA<br>K      | 45  | 24 | 6  | 23.38  | b4b6*b6b12y13y15                                                  | 2585.33 | 104.030 | 1601   | 2 | 1293.17 | -6.80  |
| P0A1D3 CH60_SALTY 60 kDa chaperonin         | 1  |                                          | GYLSPYFINKPETGAVELESPFILL<br>ADKK | 197 | 29 | 10 | 52.94  | b2b3b4b10b13b14y2y5y6y<br>29                                      | 3239.71 | 95.871  | 257861 | 4 | 810.68  | -4.60  |
| P0A1D3 CH60_SALTY 60 kDa chaperonin         | 2  |                                          | EMLPVLEAVAK                       | 231 | 11 | 11 | 70.57  | b2b3*b3y1y2y3y4y5y6y8y1<br>1                                      | 1199.66 | 79.530  | 196300 | 2 | 600.34  | -5.39  |
| P0A1D3 CH60_SALTY 60 kDa chaperonin         | 3  |                                          | ANDAAGDGTTTATVLAQSIITEGL<br>K     | 80  | 25 | 21 | 144.21 | b2*b2b3*b3b4*b4b5b14b1<br>5*b15b25y1y3y4y5y6y7y8y<br>9y10y25      | 2418.22 | 91.354  | 159213 | 3 | 806.75  | -6.26  |
| P0A1D3 CH60_SALTY 60 kDa chaperonin         | 4  |                                          | AVAAAVEELK                        | 122 | 10 | 9  | 60.81  | b2b3y1y3*y3y5y6y8y10                                              | 1000.56 | 46.933  | 101711 | 2 | 500.78  | -5.49  |
| P0A1D3 CH60_SALTY 60 kDa chaperonin         | 5  |                                          | SFGAPTITK                         | 42  | 9  | 6  | 30.3   | b2b3*b3b6y2y7                                                     | 921.50  | 44.475  | 97596  | 2 | 461.25  | -7.42  |
| P0A1D3 CH60_SALTY 60 kDa chaperonin         | 6  |                                          | QQIEEATSDYDREK                    | 350 | 14 | 12 | 90.97  | y3y4y5*y5y6*y6y7y8*y8y9<br>y14*y14                                | 1711.76 | 32.957  | 91635  | 3 | 571.26  | -11.98 |
| P0A1D3 CH60_SALTY 60 kDa chaperonin         | 7  |                                          | LAGGVAVIK                         | 371 | 9  | 8  | 59.61  | b3b4b5y1y2y7y8y9                                                  | 827.53  | 44.663  | 88701  | 2 | 414.27  | -11.73 |
| P0A1D3 CH60_SALTY 60 kDa chaperonin         | 8  | Carbamidomethyl+C(6)                     | QIVLNCGEEPSVVANTVK                | 452 | 18 | 19 | 96.08  | b6b12*b12b18y3y5*y5y6*y<br>6y9y12*y12y13*y13y14*y<br>14y15*y15y18 | 1957.02 | 61.133  | 74084  | 2 | 979.01  | 6.92   |
| P0A1D3 CH60_SALTY 60 kDa chaperonin         | 9  |                                          | GVNVLADAVK                        | 18  | 10 | 9  | 73.96  | b2b9y1y3y4y5y6y8y10                                               | 985.56  | 55.806  | 63510  | 2 | 493.28  | -7.68  |
| P0A1D3 CH60_SALTY 60 kDa chaperonin         | 10 | Carbamidomethyl+C(6)                     | ALSVPCSDSK                        | 132 | 10 | 8  | 51.64  | b2y2y3*y3y5y6y7y10                                                | 1063.50 | 34.541  | 59805  | 2 | 532.26  | -4.02  |
| P0A1D3 CH60_SALTY 60 kDa chaperonin         | 11 |                                          | AIAQVGTISANSDETVGK                | 142 | 18 | 7  | 34.38  | b13y1y8y10y13y14y18                                               | 1760.91 | 47.792  | 46546  | 2 | 880.96  | 6.10   |
| P0A1D3 CH60_SALTY 60 kDa chaperonin         | 12 |                                          | VEDALHATR                         | 395 | 9  | 7  | 45.21  | b2b7y1y3y4y6y9                                                    | 1011.52 | 25.997  | 39782  | 2 | 506.26  | -5.55  |
| P0A1D3 CH60_SALTY 60 kDa chaperonin         | 13 |                                          | LIAEAMDK                          | 160 | 8  | 3  | 40.68  | y3y6y7                                                            | 890.46  | 38.782  | 37389  | 2 | 445.73  | -8.29  |
| P0A1D3 CH60_SALTY 60 kDa chaperonin         | 14 |                                          | AVAAGMNPMDLK                      | 105 | 12 | 8  | 49.38  | b11y2y5y8*y8y9y10y12                                              | 1217.60 | 58.014  | 37074  | 2 | 609.31  | 1.80   |
| P0A1D3 CH60_SALTY 60 kDa chaperonin         | 15 |                                          | GGDGNYGYNAAATEEYGNMIDMG<br>ILDPTK | 470 | 28 | 10 | 59.23  | b2y2y3y4y8y9y12y13*y13y<br>28                                     | 2966.30 | 87.602  | 36952  | 3 | 989.44  | 6.83   |
| P0A1D3 CH60_SALTY 60 kDa chaperonin         | 16 | Carbamidomethyl+C(18)                    | SALQYAASVAGLMITTECMVTDL<br>PK     | 501 | 25 | 10 | 31.68  | b1b3*b3b6b7*b7b10y16y2<br>0y25                                    | 2670.31 | 85.938  | 34507  | 3 | 890.77  | -3.93  |

|                                                            |    |                       |                                     |     |    |    |        |                                |         |         |        |   |         |        |
|------------------------------------------------------------|----|-----------------------|-------------------------------------|-----|----|----|--------|--------------------------------|---------|---------|--------|---|---------|--------|
| [P0A1D3 CH60_SALTY 60 kDa chaperonin                       | 17 |                       | AGKPLLIIAEDVEGEALATLVVNTMR          | 242 | 26 | 8  | 61.95  | b6b7b8y1y4y5*y5y6              | 2723.50 | 136.250 | 33135  | 3 | 908.50  | -0.63  |
| [P0A1D3 CH60_SALTY 60 kDa chaperonin                       | 18 |                       | AVAAGMNPMDLKR                       | 105 | 13 | 12 | 112.6  | b2b5y2y3y4y6y7y8y9y10y11y13    | 1373.71 | 50.704  | 22792  | 2 | 687.36  | 4.44   |
| [P0A1D3 CH60_SALTY 60 kDa chaperonin                       | 19 |                       | GQNEQNVGIK                          | 430 | 11 | 9  | 65.2   | b2y1y3y6y7y8y9*y9y11           | 1201.58 | 26.239  | 22305  | 2 | 601.29  | 1.22   |
| [P0A1D3 CH60_SALTY 60 kDa chaperonin                       | 20 |                       | ATLEDLGQAKR                         | 311 | 11 | 3  | 31.12  | y4y7y8                         | 1201.65 | 38.864  | 20183  | 2 | 601.33  | -1.93  |
| [P0A1D3 CH60_SALTY 60 kDa chaperonin                       | 21 |                       | VVINKDTTIIIDGVGEEAAIQGR             | 322 | 23 | 5  | 34.8   | b2y3y4y5y23                    | 2399.28 | 67.324  | 7947   | 2 | 1200.14 | 1.73   |
| [P0A1D3 CH60_SALTY 60 kDa chaperonin                       | 22 |                       | VTLGPK                              | 28  | 6  | 2  | 29.72  | y3y5                           | 614.39  | 27.566  | 5215   | 1 | 614.39  | -1.59  |
| [P0A1D3 CH60_SALTY 60 kDa chaperonin                       | 23 |                       | IADLKGQNEQNVGIK                     | 425 | 16 | 11 | 115.22 | b3b4y3y4y8y9y10*y10y11y13y14   | 1741.89 | 39.710  | 159657 | 3 | 581.30  | -7.99  |
| [P0A1D3 CH60_SALTY 60 kDa chaperonin                       | 24 |                       | EIELEDKFENMGAMVK                    | 58  | 17 | 4  | 38.95  | y6y7y8y10                      | 2010.94 | 73.019  | 147825 | 3 | 670.98  | -6.50  |
| [P0A1D3 CH60_SALTY 60 kDa chaperonin                       | 25 | Carbamidomethyl+C(16) | AVAAAVEELKALSVPSCDSK                | 122 | 20 | 8  | 46.65  | b8*b8b9y4y6y8y10*y10           | 2045.05 | 71.508  | 41118  | 3 | 682.35  | -5.97  |
| [P0A1D3 CH60_SALTY 60 kDa chaperonin                       | 26 |                       | AMLQDIATLTGGTVISEEIGMELEKATLEDLGQAK | 286 | 35 | 11 | 51.21  | b4b6b7*b7b8b9*b9b13*b13y3*y3   | 3675.85 | 122.644 | 38983  | 3 | 1225.96 | -4.91  |
| [P0A1D3 CH60_SALTY 60 kDa chaperonin                       | 27 |                       | VGKEGVITVEDGTGLQDELDVVEGMQFDR       | 168 | 29 | 3  | 11.47  | b15y4y12                       | 3135.50 | 72.607  | 35575  | 4 | 784.63  | -3.43  |
| [P0A1D3 CH60_SALTY 60 kDa chaperonin                       | 28 | Carbamidomethyl+C(13) | AMEAPLRQIVLNCGEPSVVANTVK            | 445 | 25 | 8  | 54.61  | b3b4b5y5*y5y11y13y14           | 2725.40 | 73.503  | 21937  | 3 | 909.14  | -0.81  |
| [P0A1D3 CH60_SALTY 60 kDa chaperonin                       | 29 |                       | AIAQVGTISANSDETVGKLI AEAMDK         | 142 | 26 | 3  | 18.21  | b3b14b17                       | 2632.34 | 91.229  | 10864  | 3 | 878.12  | -2.13  |
| [P0A1D3 CH60_SALTY 60 kDa chaperonin                       | 30 |                       | DGVSVAREIELEDK                      | 51  | 14 | 4  | 27.35  | b5b10y8y10                     | 1559.77 | 37.382  | 2613   | 3 | 520.60  | -12.29 |
| [P0A1D3 CH60_SALTY 60 kDa chaperonin                       | 31 |                       | DTTIIIDGVGEEAAIQGRVAQIR             | 327 | 23 | 4  | 12.95  | b10*b10b12y5                   | 2413.24 | 98.596  | 2236   | 2 | 1207.13 | -10.42 |
| [P0A1D3 CH60_SALTY 60 kDa chaperonin                       | 32 |                       | AAAVEELK                            | 124 | 8  | 0  | 2.05   |                                | 830.46  | 46.932  | 12185  | 1 | 830.46  | -7.20  |
| [P0A1D3 CH60_SALTY 60 kDa chaperonin                       | 33 |                       | GMNPMDLKR                           | 109 | 9  | 2  | 21.13  | b3b4                           | 1061.53 | 50.732  | 11441  | 2 | 531.27  | 9.66   |
| [P0A1D3 CH60_SALTY 60 kDa chaperonin                       | 34 |                       | NVLADAVK                            | 20  | 8  | 2  | 22.33  | b6b7                           | 829.48  | 55.744  | 8706   | 1 | 829.48  | 0.88   |
| [P0A1D3 CH60_SALTY 60 kDa chaperonin                       | 35 |                       | LEDLGQAKR                           | 313 | 9  | 0  | 2.46   |                                | 1029.56 | 38.821  | 5884   | 2 | 515.28  | -13.04 |
| [P0A1D3 CH60_SALTY 60 kDa chaperonin                       | 36 |                       | EMLPVLEAVAK                         | 231 | 11 | 0  | 2.46   |                                | 1181.64 | 79.472  | 9362   | 2 | 591.32  | -12.40 |
| [P0A1D3 CH60_SALTY 60 kDa chaperonin                       | 37 |                       | QQIEEATSDYDREK                      | 350 | 14 | 0  | 3.7    |                                | 1693.77 | 32.865  | 5619   | 3 | 565.26  | 5.41   |
| [P0A251 AHPC_SALTY Alkyl hydroperoxide reductase subunit C | 1  |                       | YAMIGDPTGALTR                       | 93  | 13 | 9  | 67.55  | b2b4b5b6b8y7y10y11y13          | 1365.68 | 62.588  | 79552  | 2 | 683.35  | 1.16   |
| [P0A251 AHPC_SALTY Alkyl hydroperoxide reductase subunit C | 2  | Carbamidomethyl+C(13) | AAQYVAAHGPEVCPAK                    | 153 | 16 | 10 | 84.08  | b3b6b8y3y5y8y9y11y12y16        | 1668.79 | 34.736  | 71628  | 3 | 556.94  | -13.53 |
| [P0A251 AHPC_SALTY Alkyl hydroperoxide reductase subunit C | 3  |                       | ATFVVDPQGIQAEIVTAEGIGR              | 120 | 23 | 13 | 102.56 | b3*b3b4b5y2y5*y5y6y7y8y9y10y23 | 2384.27 | 128.740 | 47325  | 3 | 795.43  | -6.04  |
| [P0A251 AHPC_SALTY Alkyl hydroperoxide reductase subunit C | 4  |                       | EGEATLAPSLDLVGK                     | 171 | 15 | 3  | 17.99  | b9y3y5                         | 1499.78 | 52.723  | 25981  | 2 | 750.39  | -9.03  |
| [P0A251 AHPC_SALTY Alkyl hydroperoxide reductase subunit C | 5  |                       | NQAFK                               | 12  | 5  | 1  | 13.15  | b3                             | 607.31  | 51.815  | 19318  | 1 | 607.31  | -11.36 |
| [P0A251 AHPC_SALTY Alkyl hydroperoxide reductase subunit C | 6  | Carbamidomethyl+C(15) | WSVFFFYPADFTFVCPTELGDVA DHYEELQK    | 32  | 31 | 4  | 13.73  | b3b9y9y11                      | 3757.74 | 119.606 | 10854  | 3 | 1253.25 | 6.37   |
| [P0A251 AHPC_SALTY Alkyl hydroperoxide reductase subunit C | 7  | Carbamidomethyl+C(15) | IKAAQYVAAHGPEVCPAK                  | 151 | 18 | 4  | 15.45  | b17y6*y6y15                    | 1910.02 | 83.406  | 5873   | 3 | 637.34  | 12.59  |
| [P0A251 AHPC_SALTY Alkyl hydroperoxide reductase subunit C | 8  |                       | NGEFIEVTEKDTEGR                     | 17  | 15 | 6  | 29.22  | b12y3y7*y7y8*y8                | 1723.81 | 72.428  | 2453   | 2 | 862.41  | -1.27  |



|                                                           |    |                       |                                     |     |    |    |        |                                                                        |         |         |        |   |         |        |
|-----------------------------------------------------------|----|-----------------------|-------------------------------------|-----|----|----|--------|------------------------------------------------------------------------|---------|---------|--------|---|---------|--------|
| P0A251 AHPC_SALTY Alkyl hydroperoxide reductase subunit C | 9  | Carbamidomethyl+C(10) | YVAAHPGEVCPAK                       | 156 | 13 | 0  | 4.52   |                                                                        | 1398.69 | 34.749  | 2088   | 2 | 699.85  | 7.68   |
| P0A251 AHPC_SALTY Alkyl hydroperoxide reductase subunit C | 10 | Carbamidomethyl+C(11) | QYVAAHPGEVCPAK                      | 155 | 14 | 0  | 4.52   |                                                                        | 1526.73 | 34.740  | 2086   | 3 | 509.58  | -10.15 |
| Q8ZP65 TPX_SALTY Probable thiol peroxidase                | 1  |                       | SQTVHFQGNPVTVANVIPQAGSK             | 1   | 23 | 26 | 169.39 | b2b3b5b9b10*b10b11b12°b12b16b17y2y4y5°y5*y5y6°y6y7y8y9y10y12*y12y17y23 | 2379.23 | 64.045  | 167446 | 3 | 793.75  | -3.59  |
| Q8ZP65 TPX_SALTY Probable thiol peroxidase                | 2  |                       | AQAFTLVAK                           | 24  | 9  | 6  | 38.08  | y1y2y3y6y7y9                                                           | 948.54  | 52.842  | 94046  | 2 | 474.77  | -11.26 |
| Q8ZP65 TPX_SALTY Probable thiol peroxidase                | 3  | Carbamidomethyl+C(13) | VLNIFPSIDTGVCAASVR                  | 48  | 18 | 12 | 58.68  | b1b2b3b5b11y1y2y9y10y13y14y18                                          | 1919.02 | 84.611  | 93889  | 2 | 960.01  | 5.09   |
| Q8ZP65 TPX_SALTY Probable thiol peroxidase                | 4  | Carbamidomethyl+C(2)  | FCGAEGLSNVITLSTLR                   | 93  | 17 | 7  | 39.47  | b2b3b4y4y6y15y17                                                       | 1837.96 | 85.526  | 92065  | 2 | 919.48  | 4.98   |
| Q8ZP65 TPX_SALTY Probable thiol peroxidase                | 5  |                       | DLSDVSLSQYAGK                       | 33  | 13 | 9  | 76.09  | b4b5y5y6*y6y7y9y11y13                                                  | 1382.69 | 58.601  | 69575  | 2 | 691.85  | 5.47   |
| Q8ZP65 TPX_SALTY Probable thiol peroxidase                | 6  |                       | NYGVEIVDGPLK                        | 116 | 12 | 7  | 49.38  | b2b3y4y5y8y10y12                                                       | 1303.69 | 64.396  | 32624  | 2 | 652.35  | -1.87  |
| Q8ZP65 TPX_SALTY Probable thiol peroxidase                | 7  | Carbamidomethyl+C(15) | FNQLATEVENTVVLCSADLPFAQSR           | 67  | 26 | 4  | 12.06  | b12°b12y13y19                                                          | 2908.42 | 109.456 | 2994   | 4 | 727.86  | -11.58 |
| Q8ZP65 TPX_SALTY Probable thiol peroxidase                | 8  |                       | AVIVLDENDNVIFSQLVDEITHEPDYDAALNVLKA | 133 | 35 | 21 | 156.1  | b3b4b5b6b10b11y3y4y5y6y11*y11y12y13°y13*y13y20y22y24y30y31             | 3882.95 | 120.118 | 125401 | 3 | 1294.99 | -2.77  |
| Q8ZP65 TPX_SALTY Probable thiol peroxidase                | 9  | Phosphoryl STY(13)    | MSQTVHFQGNPVTVANVIPQAGSK            | 0   | 24 | 6  | 23.27  | b11°b11y5*y5y6y12                                                      | 2590.21 | 85.950  | 51913  | 3 | 864.08  | -10.93 |
| P0A1Z2 SKP_SALTY Chaperone protein skp                    | 1  |                       | METDLQSK                            | 59  | 8  | 6  | 40.68  | b2y2y4y5y6y8                                                           | 951.44  | 25.884  | 145803 | 2 | 476.22  | -8.79  |
| P0A1Z2 SKP_SALTY Chaperone protein skp                    | 2  |                       | IAIVNMGNLFQQVAQK                    | 23  | 16 | 15 | 88.55  | b1b2b3b7y1y2y3y6y7y9*y9y10y11y12y16                                    | 1773.97 | 89.325  | 129204 | 2 | 887.49  | 1.72   |
| P0A1Z2 SKP_SALTY Chaperone protein skp                    | 3  |                       | TGVSNTLENEFK                        | 39  | 12 | 11 | 75.38  | b6°b6b10y2y5y6y7y10*y10y11y12                                          | 1338.65 | 57.539  | 108047 | 2 | 669.83  | 0.64   |
| P0A1Z2 SKP_SALTY Chaperone protein skp                    | 4  |                       | VANDQSIDLVDANTVAYNSSDV K DITADVLK   | 126 | 32 | 7  | 23.42  | b1b5b7b9b11*b11y1                                                      | 3392.70 | 89.273  | 64185  | 3 | 1131.57 | -0.58  |
| P0A1Z2 SKP_SALTY Chaperone protein skp                    | 5  |                       | QTFAQK                              | 91  | 6  | 2  | 13.56  | y4*y4                                                                  | 722.37  | 42.152  | 8060   | 1 | 722.37  | -11.91 |
| P0A1Z2 SKP_SALTY Chaperone protein skp                    | 6  |                       | VANDQSIDLVDANTVAYNSSDV K            | 126 | 24 | 3  | 18.93  | b6b12b14                                                               | 2537.21 | 98.750  | 2924   | 2 | 1269.11 | -10.78 |
| P0A1Z2 SKP_SALTY Chaperone protein skp                    | 7  |                       | AYNSSDV K DITADVLK                  | 142 | 16 | 3  | 16.92  | b4b8b13                                                                | 1738.87 | 89.214  | 5968   | 2 | 869.94  | -8.78  |
| P0A1Z2 SKP_SALTY Chaperone protein skp                    | 8  |                       | ETDLQSK                             | 60  | 7  | 0  | 1.23   |                                                                        | 820.40  | 25.958  | 2362   | 1 | 820.40  | -9.23  |
| P0A1Z2 SKP_SALTY Chaperone protein skp                    | 9  |                       | IAIVNMGNLFQQVAQK                    | 23  | 16 | 0  | 4.52   |                                                                        | 1756.91 | 89.378  | 1793   | 3 | 586.31  | -12.71 |
| P64052 EFTS_SALTY Elongation factor Ts                    | 1  |                       | ITDVEVLK                            | 104 | 8  | 12 | 90.27  | b2°b2b3b4y1y2y3y4y5y6y7y8                                              | 916.52  | 48.198  | 150362 | 2 | 458.77  | -11.12 |
| P64052 EFTS_SALTY Elongation factor Ts                    | 2  |                       | VASLEGDVLGSYQHGAR                   | 134 | 17 | 13 | 111.83 | b2b6y3y4y5*y5y7y8y10y11y12y13y17                                       | 1758.86 | 58.705  | 138656 | 3 | 586.96  | -8.74  |
| P64052 EFTS_SALTY Elongation factor Ts                    | 3  |                       | AEITASLVK                           | 1   | 9  | 6  | 30.3   | b3°b3y1y5y6y9                                                          | 931.54  | 48.299  | 122807 | 2 | 466.27  | -8.06  |
| P64052 EFTS_SALTY Elongation factor Ts                    | 4  |                       | IGENINIR                            | 125 | 8  | 5  | 40.68  | y4y5y7*y7y8                                                            | 928.51  | 44.078  | 97093  | 2 | 464.76  | -8.55  |
| P64052 EFTS_SALTY Elongation factor Ts                    | 5  |                       | IGVLVAAK                            | 151 | 8  | 7  | 56.84  | b2b3y1y3y5y7y8                                                         | 770.50  | 46.899  | 69565  | 2 | 385.76  | -12.52 |
| P64052 EFTS_SALTY Elongation factor Ts                    | 6  |                       | VLDAAVAGK                           | 95  | 9  | 7  | 64.38  | b2b5y3y4y6y8y9                                                         | 843.48  | 33.062  | 28209  | 2 | 422.25  | -10.78 |
| P64052 EFTS_SALTY Elongation factor Ts                    | 7  |                       | AGNVAADGVIK                         | 52  | 11 | 5  | 31.12  | y2y4y6y7y11                                                            | 1014.55 | 36.128  | 21333  | 2 | 507.78  | -4.51  |

|                                                     |    |                       |                                   |     |    |    |        |                                        |         |         |        |   |         |        |
|-----------------------------------------------------|----|-----------------------|-----------------------------------|-----|----|----|--------|----------------------------------------|---------|---------|--------|---|---------|--------|
| P64052 EFTS_SALTY Elongation factor Ts              | 8  |                       | FTGEVSLTGQPFVMEPSK                | 222 | 18 | 8  | 30.72  | b6°b6b11b15°b15y6y9*y9                 | 1953.95 | 81.021  | 7060   | 2 | 977.48  | -5.31  |
| P64052 EFTS_SALTY Elongation factor Ts              | 9  |                       | EYQVQLDIAMQSGKPK                  | 193 | 16 | 3  | 34.42  | b8b9b10                                | 1834.95 | 70.215  | 4435   | 3 | 612.32  | 8.71   |
| P64052 EFTS_SALTY Elongation factor Ts              | 10 |                       | DAGFQAFADK                        | 85  | 10 | 3  | 28.49  | b3y8y9                                 | 1069.51 | 27.699  | 10047  | 2 | 535.26  | 15.07  |
| P64052 EFTS_SALTY Elongation factor Ts              | 11 |                       | QLAMHVAASKPEFVKPEDVSADV<br>VEK    | 167 | 26 | 11 | 55.38  | b3b7°b7b8b9°b9°b9b19y6<br>y10y11       | 2824.47 | 136.311 | 5789   | 3 | 942.16  | 5.10   |
| P64052 EFTS_SALTY Elongation factor Ts              | 12 |                       | ALTEANGDIELAIENMR                 | 25  | 17 | 4  | 16.18  | b6y7°y7y12                             | 1859.89 | 88.907  | 4964   | 3 | 620.63  | -16.34 |
| P64052 EFTS_SALTY Elongation factor Ts              | 13 | Carbamidomethyl+C(13) | IDGNVAFILEVNCQTDFVAK              | 65  | 20 | 3  | 34.47  | b4b5b6                                 | 2253.14 | 82.756  | 2038   | 2 | 1127.07 | 6.72   |
| P64052 EFTS_SALTY Elongation factor Ts              | 14 |                       | FEVGEGIEK                         | 258 | 9  | 4  | 45.21  | b3b5b6y5                               | 1007.49 | 75.587  | 1507   | 2 | 504.25  | -15.51 |
| P64052 EFTS_SALTY Elongation factor Ts              | 15 |                       | DAGFQAFADKVLDAAVAGK               | 85  | 19 | 5  | 14.82  | b14°b14y3y7°y7                         | 1893.98 | 98.774  | 25057  | 2 | 947.49  | 2.84   |
| P64052 EFTS_SALTY Elongation factor Ts              | 16 |                       | KALTEANGDIELAIENMR                | 24  | 18 | 6  | 32.37  | y9*y9y11y13*y13y14                     | 1988.01 | 66.231  | 14452  | 2 | 994.51  | 1.23   |
| P64052 EFTS_SALTY Elongation factor Ts              | 17 | Carbamidomethyl+C(15) | TKIDGNVAFILEVNCQTDFVAK            | 63  | 22 | 4  | 36.98  | y8y10y11y12                            | 2482.24 | 68.951  | 2505   | 2 | 1241.62 | -9.15  |
| P64052 EFTS_SALTY Elongation factor Ts              | 18 | Phosphoryl STY(12)    | EYQVQLDIAMQSGKPKEIAEK             | 193 | 21 | 3  | 13.77  | b7b11y11                               | 2485.19 | 67.283  | 4972   | 3 | 829.07  | -2.26  |
| P64052 EFTS_SALTY Elongation factor Ts              | 19 | Oxidation+M(14)       | FTGEVSLTGQPFVMEPSK                | 222 | 18 | 3  | 15.45  | b3b14y10                               | 1969.94 | 73.014  | 7443   | 2 | 985.47  | -7.81  |
| P64052 EFTS_SALTY Elongation factor Ts              | 20 | Oxidation+M(16)       | ALTEANGDIELAIENMRK                | 25  | 18 | 4  | 15.45  | b9°b9b14y4                             | 2004.01 | 71.467  | 2495   | 2 | 1002.51 | 2.74   |
| P64052 EFTS_SALTY Elongation factor Ts              | 21 |                       | ITASLVK                           | 3   | 7  | 0  | 1.64   |                                        | 731.46  | 48.316  | 23755  | 1 | 731.46  | -6.68  |
| P64052 EFTS_SALTY Elongation factor Ts              | 22 |                       | SLEGDVLSYQHGAR                    | 136 | 15 | 2  | 20.81  | b8b9                                   | 1588.78 | 58.755  | 2894   | 2 | 794.90  | 7.22   |
| P64052 EFTS_SALTY Elongation factor Ts              | 23 |                       | LDAAVAGK                          | 96  | 8  | 0  | 1.64   |                                        | 744.43  | 33.042  | 2433   | 1 | 744.43  | 1.64   |
| P67093 UG_SALTY Universal stress protein G          | 1  |                       | TIIMPVDVFEMELSDK                  | 3   | 16 | 13 | 66.35  | b1b2b3b4y1y6y9y12°y12y<br>13y14°y14y16 | 1866.93 | 104.062 | 90197  | 2 | 933.97  | 6.28   |
| P67093 UG_SALTY Universal stress protein G          | 2  |                       | NPSITTHLLGSNASSVVR                | 114 | 18 | 6  | 26.38  | b4°b4b6b7y8y18                         | 1852.98 | 58.688  | 43951  | 3 | 618.33  | -2.37  |
| P67093 UG_SALTY Universal stress protein G          | 3  |                       | DVVNEMGEELDADVVVIGSR              | 94  | 20 | 6  | 27.75  | b4°b4b6b8y12y14                        | 2146.07 | 118.075 | 2741   | 2 | 1073.54 | 17.86  |
| P67093 UG_SALTY Universal stress protein G          | 4  |                       | TIIMPVDVFEMELSDKAIR               | 3   | 19 | 3  | 21.77  | y4y11y16                               | 2207.13 | 100.305 | 29310  | 3 | 736.38  | -8.74  |
| P67093 UG_SALTY Universal stress protein G          | 5  |                       | MYKTIIMPVDVFEMELSDK               | 0   | 19 | 3  | 23.99  | y8y12y13                               | 2289.12 | 98.108  | 2377   | 3 | 763.71  | -0.43  |
| P67093 UG_SALTY Universal stress protein G          | 6  | Oxidation+M(24)       | HAEFLAQDQGVIIHLHLVLPGSAS<br>MSLHR | 22  | 28 | 5  | 26.7   | y3y5y7°y7y8                            | 3079.61 | 137.300 | 41093  | 3 | 1027.21 | 6.58   |
| P67093 UG_SALTY Universal stress protein G          | 7  | Oxidation+M(11)       | TIIMPVDVFEMELSDK                  | 3   | 16 | 6  | 45.6   | b9b13b15y11y12y15                      | 1882.91 | 76.862  | 3704   | 3 | 628.31  | -3.70  |
| P66193 RL31B_SALTY 50S ribosomal protein L31 type B | 1  |                       | TVVFHDTSANEYVK                    | 10  | 14 | 12 | 105.23 | b1b11°b11b12y3y4y8y9y1<br>0y11y12y14   | 1609.77 | 46.731  | 263303 | 3 | 537.26  | -12.36 |
| P66193 RL31B_SALTY 50S ribosomal protein L31 type B | 2  |                       | TFDSESSAAR                        | 62  | 10 | 9  | 60.81  | b3°b3y1y4y5y7y8°y8y10                  | 1070.47 | 23.916  | 67943  | 2 | 535.74  | -4.11  |
| P66193 RL31B_SALTY 50S ribosomal protein L31 type B | 3  |                       | VGSTIKTER                         | 24  | 9  | 4  | 57.25  | y3y4y7y8                               | 990.55  | 17.627  | 34736  | 2 | 495.78  | -6.72  |
| P66193 RL31B_SALTY 50S ribosomal protein L31 type B | 4  |                       | QKTFDSESSAAR                      | 60  | 12 | 3  | 26.09  | b3y3y4                                 | 1326.61 | 22.050  | 23129  | 3 | 442.87  | -14.72 |
| P66193 RL31B_SALTY 50S ribosomal protein L31 type B | 5  |                       | TVVFHDTSANEYVKVGSTIK              | 10  | 20 | 8  | 61.49  | b6b7°b7b8b9b10°b10*b10                 | 2195.12 | 136.227 | 1762   | 2 | 1098.06 | -7.45  |
| P66193 RL31B_SALTY 50S ribosomal protein L31 type B | 6  | Phosphoryl STY(11)    | TEREIELDGVITYPYVTIDVSSK           | 30  | 22 | 3  | 13.33  | b5b9y12                                | 2594.21 | 82.176  | 3550   | 2 | 1297.61 | -2.07  |

|                                                     |    |                       |                                            |     |    |    |        |                                                |         |         |        |   |         |        |
|-----------------------------------------------------|----|-----------------------|--------------------------------------------|-----|----|----|--------|------------------------------------------------|---------|---------|--------|---|---------|--------|
| P66193 RL31B_SALTY 50S ribosomal protein L31 type B | 7  |                       | VFHDTSANEYVK                               | 12  | 12 | 5  | 54.67  | b3b5b9b10b11                                   | 1409.66 | 46.692  | 21723  | 2 | 705.34  | -4.42  |
| P17215 LIVJ_SALTY Leu/Ile/Val/Thr-binding protein   | 1  |                       | TQFMGPEGVANVSLNIAGESAE<br>GLLVTKPK         | 240 | 31 | 12 | 56.05  | b2b3b4b11y1y3y13y14y22<br>y27y28y31            | 3144.63 | 87.803  | 119986 | 3 | 1048.88 | 2.64   |
| P17215 LIVJ_SALTY Leu/Ile/Val/Thr-binding protein   | 2  |                       | NYDQVPANKPIVDAIK                           | 271 | 16 | 9  | 35.16  | b2*b2b4b9b10y3y11*y11y<br>16                   | 1784.94 | 53.495  | 118789 | 3 | 595.65  | -9.44  |
| P17215 LIVJ_SALTY Leu/Ile/Val/Thr-binding protein   | 3  |                       | TTGLDSDQGPTAAK                             | 137 | 14 | 16 | 111.17 | b2°b2b3°b3b4b12y5y7*y7y<br>8y9y10°y10y11y12y14 | 1361.65 | 28.632  | 79571  | 2 | 681.33  | -0.63  |
| P17215 LIVJ_SALTY Leu/Ile/Val/Thr-binding protein   | 4  | Carbamidomethyl+C(7)  | YVIGHLCSSSTQPASDIYEDEGILM<br>ITPAATAPELTAR | 92  | 38 | 12 | 55.45  | b2b12b25b27y6y8y10y11°<br>y11y12y13y38         | 4077.98 | 88.875  | 64487  | 3 | 1360.00 | -0.24  |
| P17215 LIVJ_SALTY Leu/Ile/Val/Thr-binding protein   | 5  |                       | VAVVGAMSGPVAQYGDQEFTGA<br>EQAIADINAK       | 25  | 32 | 16 | 60.52  | b1b2b4b15y2y3y4y5*y5y6°<br>y6y8y10*y10y25y32   | 3207.57 | 89.191  | 59134  | 3 | 1069.86 | 2.21   |
| P17215 LIVJ_SALTY Leu/Ile/Val/Thr-binding protein   | 6  |                       | ENIDFVYYGGYHPMGQILR                        | 212 | 20 | 3  | 22.39  | b9y9y10                                        | 2401.16 | 79.874  | 8558   | 2 | 1201.08 | 11.39  |
| P17215 LIVJ_SALTY Leu/Ile/Val/Thr-binding protein   | 7  |                       | GATVDTVMGPLSWDEK                           | 326 | 16 | 3  | 14.28  | b5°b5b13                                       | 1705.83 | 59.023  | 6866   | 3 | 569.28  | 13.17  |
| P17215 LIVJ_SALTY Leu/Ile/Val/Thr-binding protein   | 8  |                       | GGVNVVFFDGITAGEK                           | 185 | 16 | 3  | 34.42  | y10y11y12                                      | 1609.81 | 70.179  | 3943   | 2 | 805.41  | -9.10  |
| P17215 LIVJ_SALTY Leu/Ile/Val/Thr-binding protein   | 9  | Carbamidomethyl+C(6)  | TLLAGCIALSLSHMAFADDIK                      | 4   | 21 | 6  | 30.94  | b8y5°y5y10y11y14                               | 2247.13 | 78.159  | 5353   | 3 | 749.71  | -10.65 |
| P17215 LIVJ_SALTY Leu/Ile/Val/Thr-binding protein   | 10 |                       | GFEFGVFDWHANGTATDAK                        | 346 | 19 | 6  | 41.78  | b6°b6b7b8y4y10                                 | 2069.98 | 58.518  | 5110   | 3 | 690.66  | 21.11  |
| P17215 LIVJ_SALTY Leu/Ile/Val/Thr-binding protein   | 11 |                       | KQDPSGAFVWTTYAALQSLQAGL<br>NHSDDPAEIAK     | 289 | 34 | 9  | 39.26  | b3b7b14b15y8y10y11y14*<br>y14                  | 3629.77 | 102.836 | 116319 | 4 | 908.20  | -5.99  |
| P17215 LIVJ_SALTY Leu/Ile/Val/Thr-binding protein   | 12 |                       | GDLKGFEFGVFDWHANGTATDA<br>K                | 342 | 23 | 3  | 12.95  | b15y5y8                                        | 2483.19 | 90.156  | 28604  | 3 | 828.40  | 9.73   |
| P17215 LIVJ_SALTY Leu/Ile/Val/Thr-binding protein   | 13 |                       | SGPVAQYGDQEFTGAEQAIADINA<br>K              | 32  | 25 | 0  | 11.09  |                                                | 2580.24 | 89.197  | 5271   | 3 | 860.75  | 5.68   |
| P0A2M5 UPP_SALTY Uracil phohoribosyltransferase     | 1  |                       | AGLGMMEGVLENVPSAR                          | 78  | 17 | 9  | 49.4   | b13b14*b14y4y6°y6y7y12<br>y17                  | 1730.86 | 81.269  | 54318  | 2 | 865.93  | 3.53   |
| P0A2M5 UPP_SALTY Uracil phohoribosyltransferase     | 2  |                       | VLVLVAAPEGIAALEK                           | 155 | 16 | 7  | 77.99  | b3b4b5b6y9y10y11                               | 1592.96 | 85.383  | 36954  | 2 | 796.99  | 1.38   |
| P0A2M5 UPP_SALTY Uracil phohoribosyltransferase     | 3  |                       | ITVVPILR                                   | 70  | 8  | 5  | 53.83  | y2y4y5y6y7                                     | 910.60  | 69.590  | 14387  | 2 | 455.80  | -6.90  |
| P0A2M5 UPP_SALTY Uracil phohoribosyltransferase     | 4  |                       | ELASEVGSLLTYEATADLETEK                     | 29  | 22 | 6  | 20.69  | b3b7b15y2°y2y6                                 | 2369.17 | 108.399 | 3160   | 2 | 1185.09 | 4.12   |
| P0A2M5 UPP_SALTY Uracil phohoribosyltransferase     | 5  |                       | LVSNI DER                                  | 116 | 8  | 3  | 40.68  | y3y6y7                                         | 945.49  | 32.138  | 21999  | 2 | 473.25  | -7.62  |
| P0A2M5 UPP_SALTY Uracil phohoribosyltransferase     | 6  |                       | NEETLEPVVPYFQK                             | 103 | 13 | 5  | 34.21  | b10b11°b11y5y7                                 | 1593.78 | 64.911  | 17243  | 2 | 797.39  | 0.69   |
| P0A2M5 UPP_SALTY Uracil phohoribosyltransferase     | 7  |                       | ISVVGMYRNEETLEPVVPYFQK                     | 95  | 21 | 3  | 13.77  | b11b13y6                                       | 2499.30 | 102.412 | 28232  | 3 | 833.77  | 14.65  |
| P0A2M5 UPP_SALTY Uracil phohoribosyltransferase     | 8  |                       | NEETLEPVVPYFQKLVSNI DER                    | 103 | 21 | 3  | 22.22  | b12y3y4                                        | 2520.28 | 116.949 | 7229   | 3 | 840.77  | 8.72   |
| P0A2M5 UPP_SALTY Uracil phohoribosyltransferase     | 9  | Phosphoryl.STY(3)     | LVSNI DER                                  | 116 | 8  | 4  | 32.9   | b5y4°y4y5                                      | 1025.47 | 94.319  | 1532   | 1 | 1025.47 | 14.05  |
| Q9L4T0 LUXS_SALTY S-ribosylhomocysteine lyase       | 1  |                       | TMNTPHGDAITVFDLR                           | 23  | 16 | 6  | 39.63  | y2y6y10°y10y11y12                              | 1787.86 | 71.033  | 40692  | 3 | 596.62  | -9.35  |
| Q9L4T0 LUXS_SALTY S-ribosylhomocysteine lyase       | 2  | Carbamidomethyl+C(2)  | FCIPNKEVMPEK                               | 39  | 12 | 5  | 29.31  | b2y1y4y9y10                                    | 1491.72 | 52.147  | 32454  | 3 | 497.91  | -10.64 |
| Q9L4T0 LUXS_SALTY S-ribosylhomocysteine lyase       | 3  | Carbamidomethyl+C(15) | VQDQNQIPELNVYQCGTYQMHS<br>LSEAQDIAR        | 113 | 31 | 12 | 65.59  | b6°b6b7b9y1y7y8y9y10y1<br>2y24y31              | 3635.69 | 74.319  | 26066  | 3 | 1212.57 | 1.54   |
| Q9L4T0 LUXS_SALTY S-ribosylhomocysteine lyase       | 4  | Carbamidomethyl+C(18) | DHLNGNGVEIIDSPMGCR                         | 65  | 19 | 7  | 34.85  | b2b12y4y8y11y14y19                             | 2096.97 | 66.064  | 7000   | 3 | 699.66  | -5.94  |
| Q9L4T0 LUXS_SALTY S-ribosylhomocysteine lyase       | 5  |                       | TGFYMSLIGTPDEQR                            | 84  | 15 | 6  | 29.22  | b3°b3b12b14*b14y10                             | 1714.85 | 81.990  | 8577   | 3 | 572.29  | 20.29  |

|                                                                 |    |                       |                              |     |    |    |        |                                     |         |         |        |   |         |        |
|-----------------------------------------------------------------|----|-----------------------|------------------------------|-----|----|----|--------|-------------------------------------|---------|---------|--------|---|---------|--------|
| Q9L4T0 LUXS_SALTY S-ribosylhomocysteine lyase                   | 6  |                       | GIHTLEHLFAGFMR               | 51  | 14 | 4  | 19.13  | b9°b9b11y11                         | 1628.84 | 75.572  | 4513   | 2 | 814.92  | 3.67   |
| Q9L4T0 LUXS_SALTY S-ribosylhomocysteine lyase                   | 7  |                       | PLLDSDFAVDHTR                | 1   | 12 | 4  | 44.68  | y3y5y7y8                            | 1370.70 | 57.354  | 3571   | 3 | 457.57  | -6.68  |
| Q9L4T0 LUXS_SALTY S-ribosylhomocysteine lyase                   | 8  | Carbamidomethyl+C(18) | TMNTPHGDAITVFDLRFCIPNK       | 23  | 22 | 4  | 13.33  | b3b11y7*y7                          | 2547.28 | 71.374  | 2678   | 2 | 1274.15 | 14.28  |
| Q9L4T0 LUXS_SALTY S-ribosylhomocysteine lyase                   | 9  |                       | TGFYMSLIGTPDEQRVADAWK        | 84  | 21 | 3  | 23.42  | y6y11y12                            | 2385.16 | 108.361 | 2409   | 3 | 795.73  | 3.48   |
| Q7CPE2 ATPB_SALTY ATP synthase subunit beta                     | 1  |                       | VALTGLTMAEK                  | 219 | 11 | 10 | 100.67 | b2b3b5y3y4y5y7°y7y8y9               | 1133.62 | 58.772  | 52382  | 2 | 567.31  | -1.72  |
| Q7CPE2 ATPB_SALTY ATP synthase subunit beta                     | 2  |                       | YTLAGTEVSALLGR               | 247 | 14 | 7  | 27.7   | b2°b2y1y4y6y11y14                   | 1450.79 | 79.573  | 49123  | 2 | 725.90  | -1.09  |
| Q7CPE2 ATPB_SALTY ATP synthase subunit beta                     | 3  |                       | TVNMMELIR                    | 156 | 9  | 6  | 30.3   | b3b9y3y7y9*y9                       | 1106.56 | 75.679  | 48163  | 2 | 553.79  | -4.74  |
| Q7CPE2 ATPB_SALTY ATP synthase subunit beta                     | 4  |                       | QLDPLVVQGEHYDTAR             | 343 | 16 | 13 | 115.08 | b2y3y4y5y6y9°y9y10y11°y11*y11y13y14 | 1840.91 | 57.557  | 43335  | 3 | 614.31  | -7.16  |
| Q7CPE2 ATPB_SALTY ATP synthase subunit beta                     | 5  | Carbamidomethyl+C(6)  | VIDLMCPFAK                   | 132 | 10 | 8  | 70.16  | b3b9y5y6y7y8°y8y10                  | 1193.59 | 80.270  | 40925  | 2 | 597.30  | -12.58 |
| Q7CPE2 ATPB_SALTY ATP synthase subunit beta                     | 6  |                       | FLSQPFFVAEVFTGSPGK           | 399 | 18 | 6  | 22.61  | y7°y7y10°y10y14y18                  | 1958.02 | 99.347  | 35184  | 2 | 979.51  | 7.04   |
| Q7CPE2 ATPB_SALTY ATP synthase subunit beta                     | 7  |                       | MPSAVGYQPTLAEEMGVLQER        | 261 | 21 | 6  | 23.42  | b21y4y6y7°y7y21                     | 2306.13 | 80.831  | 31551  | 2 | 1153.57 | 4.66   |
| Q7CPE2 ATPB_SALTY ATP synthase subunit beta                     | 8  |                       | VGLFGGAGVGK                  | 145 | 11 | 3  | 31.12  | y4y7y8                              | 961.54  | 58.655  | 28249  | 2 | 481.27  | -5.90  |
| Q7CPE2 ATPB_SALTY ATP synthase subunit beta                     | 9  |                       | QIASLGIYPAVDPLDSTSR          | 324 | 19 | 7  | 38.78  | b5b9y4y11y12y14y19                  | 2003.06 | 79.708  | 27635  | 2 | 1002.03 | 5.42   |
| Q7CPE2 ATPB_SALTY ATP synthase subunit beta                     | 10 |                       | AAPSYEELSNSQELLETK           | 112 | 20 | 9  | 41.18  | b1b13b14°b14b15y1y12y18y20          | 2179.09 | 72.923  | 23111  | 2 | 1090.05 | 7.62   |
| Q7CPE2 ATPB_SALTY ATP synthase subunit beta                     | 11 |                       | TIAMGSSDGLRR                 | 53  | 12 | 4  | 29.31  | b4b5b9y12                           | 1263.64 | 32.792  | 16361  | 2 | 632.32  | -5.22  |
| Q7CPE2 ATPB_SALTY ATP synthase subunit beta                     | 12 |                       | NIAIEHSGYSVFAGVGER           | 165 | 18 | 7  | 30.72  | b8b15°b15b17y5°y5y11                | 1905.93 | 83.412  | 7098   | 2 | 953.47  | -8.58  |
| Q7CPE2 ATPB_SALTY ATP synthase subunit beta                     | 13 |                       | TIAMGSSDGLR                  | 53  | 11 | 3  | 35.89  | y3y5y10                             | 1107.55 | 46.003  | 3425   | 2 | 554.28  | 5.40   |
| Q7CPE2 ATPB_SALTY ATP synthase subunit beta                     | 14 |                       | GIMEGEYDHLPEQAFYMVGSIDE AVEK | 429 | 27 | 5  | 27     | y5y6°y6y11y13                       | 3057.43 | 91.948  | 33903  | 3 | 1019.82 | 16.13  |
| Q7CPE2 ATPB_SALTY ATP synthase subunit beta                     | 15 |                       | YQELK                        | 367 | 5  | 2  | 26.3   | b3b4                                | 680.36  | 30.286  | 5445   | 1 | 680.36  | -3.41  |
| Q7CPE2 ATPB_SALTY ATP synthase subunit beta                     | 16 |                       | DEGRDVLLFVDNIYR              | 232 | 15 | 3  | 17.99  | b6b12y7                             | 1823.95 | 99.005  | 303151 | 2 | 912.48  | 12.92  |
| Q7CPE2 ATPB_SALTY ATP synthase subunit beta                     | 17 | Carbamidomethyl+C(6)  | VIDLMCPFAKGGK                | 132 | 13 | 3  | 20.48  | b3b7y3                              | 1435.74 | 65.396  | 2971   | 3 | 479.25  | -0.51  |
| Q7CPE2 ATPB_SALTY ATP synthase subunit beta                     | 18 | Oxidation+M(11)       | IMNVLGEPVDMK                 | 87  | 12 | 3  | 26.09  | b6b7y9                              | 1361.69 | 33.122  | 17571  | 3 | 454.57  | 3.77   |
| Q7CPE2 ATPB_SALTY ATP synthase subunit beta                     | 19 | Oxidation+M(13)       | YQELKDIIAILGMDELSEEDK        | 367 | 21 | 4  | 13.77  | b4b14y14°y14                        | 2468.20 | 97.852  | 2583   | 3 | 823.40  | -6.03  |
| Q7CPE2 ATPB_SALTY ATP synthase subunit beta                     | 20 |                       | QLDPLVVQGEHYDTAR             | 343 | 16 | 0  | 4.52   |                                     | 1823.88 | 57.472  | 1908   | 3 | 608.63  | -6.22  |
| Q9ZF60 GLTI_SALTY Glutamate/aartate periplasmic-binding protein | 1  |                       | VVGYSQDYSNAIVEAVKK           | 61  | 18 | 10 | 50.08  | b1b2y1y2y4y6y12y14y16y18            | 1970.01 | 62.863  | 134380 | 3 | 657.34  | -7.31  |
| Q9ZF60 GLTI_SALTY Glutamate/aartate periplasmic-binding protein | 2  |                       | ESSVPFSYYDNQK                | 47  | 14 | 12 | 102.8  | b4°b4b11y4y5y6y7y8y9y10°y10y14      | 1691.76 | 54.791  | 118734 | 2 | 846.38  | 3.54   |
| Q9ZF60 GLTI_SALTY Glutamate/aartate periplasmic-binding protein | 3  |                       | AVAFMMDDALLAGER              | 198 | 15 | 9  | 62.81  | b1b3b5y4y10y11y13y14y15             | 1609.78 | 83.863  | 110284 | 2 | 805.39  | 4.32   |

|                                                                 |    |                       |                                  |     |    |    |        |                                            |         |         |        |   |         |        |
|-----------------------------------------------------------------|----|-----------------------|----------------------------------|-----|----|----|--------|--------------------------------------------|---------|---------|--------|---|---------|--------|
| Q9ZF60 GLTI_SALTY Glutamate/aartate periplasmic-binding protein | 4  |                       | VVGYSQDYSNAIVEAVK                | 61  | 17 | 16 | 103    | b2b3b6b7b12y2y3y4y5y10y11°y11y13°y13y15y17 | 1841.93 | 67.230  | 98609  | 2 | 921.47  | 0.93   |
| Q9ZF60 GLTI_SALTY Glutamate/aartate periplasmic-binding protein | 5  | Carbamidomethyl+C(13) | IPLLQNGTFDFECGSTTNNLER           | 98  | 22 | 7  | 30.04  | b11y5y7y9*y9y10y22                         | 2526.19 | 80.985  | 30165  | 3 | 842.73  | -1.74  |
| Q9ZF60 GLTI_SALTY Glutamate/aartate periplasmic-binding protein | 6  |                       | GGDIKDFPDLK                      | 141 | 11 | 4  | 27.14  | b8y9y10y11                                 | 1204.63 | 69.283  | 29932  | 2 | 602.82  | 5.78   |
| Q9ZF60 GLTI_SALTY Glutamate/aartate periplasmic-binding protein | 7  | Carbamidomethyl+C(19) | KPDNWEIVGKPSQEAYGCMLR            | 217 | 22 | 11 | 45.42  | b4°b4*b4b5b8°b8*b8b20y5y6y9                | 2606.26 | 136.259 | 21101  | 3 | 869.43  | 5.06   |
| Q9ZF60 GLTI_SALTY Glutamate/aartate periplasmic-binding protein | 8  |                       | LMDDTIAQAQTSGEAEK                | 247 | 17 | 4  | 24.83  | y3y10y11°y11                               | 1807.85 | 45.411  | 6445   | 2 | 904.43  | 7.90   |
| Q9ZF60 GLTI_SALTY Glutamate/aartate periplasmic-binding protein | 9  |                       | NDPEFK                           | 240 | 6  | 1  | 13.56  | y5                                         | 749.35  | 79.067  | 5823   | 1 | 749.35  | 8.39   |
| Q9ZF60 GLTI_SALTY Glutamate/aartate periplasmic-binding protein | 10 |                       | WFDK                             | 264 | 4  | 1  | 12.74  | y3                                         | 595.29  | 32.437  | 2181   | 1 | 595.29  | 10.77  |
| Q9ZF60 GLTI_SALTY Glutamate/aartate periplasmic-binding protein | 11 | Carbamidomethyl+C(22) | LIPITSQNRIPLLQNGTFDFECGSTTNNLER  | 89  | 31 | 9  | 50.59  | b3b13y4y6y9y10y12y21y27                    | 3548.79 | 86.255  | 269134 | 3 | 1183.60 | 1.65   |
| Q9ZF60 GLTI_SALTY Glutamate/aartate periplasmic-binding protein | 12 |                       | AVVVTSGTTSEILLHLNREEQK           | 154 | 22 | 10 | 68.56  | b3b13y3y5y8y9y10y18°y18y19                 | 2396.29 | 63.261  | 50787  | 3 | 799.43  | -6.83  |
| Q9ZF60 GLTI_SALTY Glutamate/aartate periplasmic-binding protein | 13 |                       | LMDDTIAQAQTSGEAEKWFDK            | 247 | 21 | 6  | 29.83  | y3°y3y4y9y13*y13                           | 2384.10 | 88.412  | 16726  | 4 | 596.78  | -2.97  |
| Q9ZF60 GLTI_SALTY Glutamate/aartate periplasmic-binding protein | 14 |                       | KLMDDTIAQAQTSGEAEK               | 246 | 18 | 6  | 21.55  | b12b14y9°y9y11°y11                         | 1935.94 | 83.433  | 7582   | 2 | 968.48  | 6.31   |
| Q9ZF60 GLTI_SALTY Glutamate/aartate periplasmic-binding protein | 15 | Carbamidomethyl+C(19) | KPDNWEIVGKPSQEAYGCMLRK           | 217 | 23 | 5  | 28.64  | y6y7y10y12°y12                             | 2734.36 | 89.295  | 5644   | 3 | 912.12  | 5.80   |
| Q9ZF60 GLTI_SALTY Glutamate/aartate periplasmic-binding protein | 16 | Oxidation+M(8)        | LTTAMLVMGLSAGLAHAEDGAP AAGSTLDDK | 5   | 30 | 4  | 11.33  | b5b9°b9y6                                  | 2885.40 | 109.463 | 8797   | 3 | 962.47  | -11.68 |
| Q9ZF60 GLTI_SALTY Glutamate/aartate periplasmic-binding protein | 17 |                       | DIKDFPDLK                        | 143 | 9  | 0  | 2.46   |                                            | 1090.58 | 69.363  | 9614   | 2 | 545.79  | -0.67  |
| P00924 ENO1_YEAST Enolase 1                                     | 1  |                       | NVNDVIAPAFVK                     | 67  | 12 | 13 | 102.64 | b2b4b5°b5b6°b6b9y5y6y7y8y10y12             | 1286.71 | 65.643  | 104876 | 2 | 643.86  | -3.79  |
| P00924 ENO1_YEAST Enolase 1                                     | 2  |                       | VNQIGTLESSEIK                    | 346 | 12 | 12 | 75.38  | b2*b2b3b9y1y2y5y6y8y9y10y12                | 1288.71 | 53.904  | 65475  | 2 | 644.86  | -0.28  |
| P00924 ENO1_YEAST Enolase 1                                     | 3  |                       | SIVPSGASTGVHEALEMR               | 32  | 18 | 7  | 43.41  | b8b14b15y2y10y14y15                        | 1840.91 | 61.812  | 62661  | 3 | 614.31  | -8.49  |
| P00924 ENO1_YEAST Enolase 1                                     | 4  |                       | AADALLLK                         | 338 | 8  | 4  | 40.68  | y4y5y6y8                                   | 814.49  | 53.480  | 62535  | 2 | 407.75  | -11.76 |
| P00924 ENO1_YEAST Enolase 1                                     | 5  |                       | TFAEALR                          | 178 | 7  | 6  | 69.58  | b3b6y4y5y6y7                               | 807.43  | 45.205  | 50340  | 2 | 404.22  | -7.71  |
| P00924 ENO1_YEAST Enolase 1                                     | 6  |                       | IGSEVYHNLK                       | 185 | 10 | 4  | 28.49  | b2b3y5y6                                   | 1159.60 | 38.946  | 39533  | 3 | 387.20  | -9.05  |
| P00924 ENO1_YEAST Enolase 1                                     | 7  |                       | GNPTVEVELTTEK                    | 15  | 13 | 5  | 20.48  | b2b8b12y6y13                               | 1416.72 | 62.386  | 33062  | 2 | 708.86  | -4.05  |
| P00924 ENO1_YEAST Enolase 1                                     | 8  |                       | IATAIEK                          | 330 | 7  | 7  | 37.26  | b2b4°b4y1y5y6y7                            | 745.44  | 27.623  | 25465  | 2 | 373.22  | -12.77 |
| P00924 ENO1_YEAST Enolase 1                                     | 9  |                       | AVDDFLISLDGTANK                  | 88  | 15 | 5  | 37.67  | b7y1y6y7y8                                 | 1578.80 | 81.569  | 13562  | 2 | 789.90  | -1.70  |
| P00924 ENO1_YEAST Enolase 1                                     | 10 |                       | YDLDFK                           | 258 | 6  | 2  | 26.71  | y4y5                                       | 800.37  | 54.570  | 65765  | 2 | 400.69  | -10.90 |
| P00924 ENO1_YEAST Enolase 1                                     | 11 |                       | IEEELGDNAVFAGENFHHGDK            | 415 | 21 | 5  | 27.2   | b9b14y12y13*y13                            | 2328.09 | 80.806  | 39407  | 3 | 776.70  | 14.58  |
| P00924 ENO1_YEAST Enolase 1                                     | 12 |                       | WLTGPQLADLYHSLMK                 | 272 | 16 | 4  | 39.63  | y6y7y8y10                                  | 1872.98 | 101.120 | 27978  | 2 | 936.99  | 7.76   |
| P00924 ENO1_YEAST Enolase 1                                     | 13 |                       | NVPLYK                           | 126 | 6  | 1  | 13.56  | y4                                         | 733.42  | 36.551  | 8971   | 1 | 733.42  | -9.15  |
| P00924 ENO1_YEAST Enolase 1                                     | 14 |                       | AAQDSFAAGWGVMVSHR                | 358 | 17 | 4  | 16.18  | b14*b14y9y15                               | 1789.86 | 103.562 | 6214   | 2 | 895.43  | 10.09  |

|                                                |    |                      |                                     |     |    |    |        |                                                         |         |         |        |   |         |        |
|------------------------------------------------|----|----------------------|-------------------------------------|-----|----|----|--------|---------------------------------------------------------|---------|---------|--------|---|---------|--------|
| [P00924]ENO1_YEAST Enolase 1                   | 15 |                      | SGETEDTFIADLVVGLR                   | 375 | 17 | 3  | 23.58  | b10b12b16                                               | 1821.96 | 72.565  | 4943   | 3 | 607.99  | 18.49  |
| [P00924]ENO1_YEAST Enolase 1                   | 16 |                      | NPNSDK                              | 264 | 6  | 2  | 26.71  | y4y5                                                    | 674.31  | 111.837 | 1676   | 1 | 674.31  | -6.88  |
| [P00924]ENO1_YEAST Enolase 1                   | 17 | Carbamidomethyl+C(7) | VKIGLDCASSEFFK                      | 241 | 14 | 4  | 32.79  | b10b12y5y6                                              | 1600.78 | 41.076  | 9178   | 2 | 800.89  | -13.88 |
| [P00924]ENO1_YEAST Enolase 1                   | 18 |                      | GVFRSIVPSGASTGVHEALEMR              | 28  | 22 | 3  | 13.33  | b10y3y10                                                | 2300.18 | 48.488  | 7388   | 3 | 767.40  | 0.21   |
| [P00924]ENO1_YEAST Enolase 1                   | 19 | Phosphoryl STY(8)    | VNQIGTLSESIK                        | 346 | 12 | 6  | 34.01  | b6b8°b8b9y10°y10                                        | 1368.65 | 57.225  | 118022 | 2 | 684.83  | -14.63 |
| [P00924]ENO1_YEAST Enolase 1                   | 20 | Phosphoryl STY(8)    | AVDDFLISLDGTANK                     | 88  | 15 | 5  | 44.41  | b3b6b9b12y6                                             | 1658.74 | 69.217  | 9516   | 3 | 553.58  | -10.74 |
| [P00924]ENO1_YEAST Enolase 1                   | 21 | Oxidation+M(15)      | WLTGSQLADLYHSLMKR                   | 272 | 17 | 4  | 16.18  | b9b11°b11y6                                             | 2045.05 | 116.563 | 19220  | 2 | 1023.03 | -6.57  |
| [P00924]ENO1_YEAST Enolase 1                   | 22 | Oxidation+M(17)      | SIVPSGASTGVHEALEMR                  | 32  | 18 | 7  | 39.88  | b10°b10b11y3y4°y4y6                                     | 1856.91 | 136.159 | 2804   | 2 | 928.96  | -5.85  |
| [P00924]ENO1_YEAST Enolase 1                   | 23 |                      | GSEVYHNLK                           | 186 | 9  | 0  | 2.05   |                                                         | 1046.52 | 38.947  | 24664  | 2 | 523.76  | -9.68  |
| [P00924]ENO1_YEAST Enolase 1                   | 24 |                      | IATAIEK                             | 330 | 7  | 0  | 0.82   |                                                         | 727.42  | 27.604  | 2661   | 2 | 364.21  | -12.33 |
| [P66541]RS2_SALTY 30S ribosomal protein S2     | 1  |                      | WLGGMLTNWK                          | 95  | 10 | 10 | 52.24  | b3b7°b7b10y1y3°y3y4y8y10                                | 1205.61 | 85.854  | 93549  | 2 | 603.31  | -5.27  |
| [P66541]RS2_SALTY 30S ribosomal protein S2     | 2  |                      | MATVSMRMDLK                         | 0   | 11 | 5  | 27.14  | b4b5y1y6y11                                             | 1282.63 | 58.962  | 44309  | 3 | 428.21  | -2.09  |
| [P66541]RS2_SALTY 30S ribosomal protein S2     | 3  | Carbamidomethyl+C(6) | EAANSCDQFFVNHR                      | 81  | 14 | 5  | 44.53  | y1y3y4y7y8                                              | 1694.72 | 46.955  | 40760  | 3 | 565.58  | -8.72  |
| [P66541]RS2_SALTY 30S ribosomal protein S2     | 4  |                      | EANNLGIPVFAIVDTNSDPDGVDF VIPGNDDAIR | 174 | 34 | 15 | 67.23  | b5°b5b6°b6b7°b7°b7b17y3y4y7y8y13y16y34                  | 3569.75 | 103.782 | 28842  | 3 | 1190.59 | 3.35   |
| [P66541]RS2_SALTY 30S ribosomal protein S2     | 5  |                      | TVPMFNEALAE LNK                     | 45  | 14 | 8  | 54.67  | b3°b3b4b5b7b10°b10y14                                   | 1576.83 | 67.930  | 16558  | 2 | 788.92  | 13.55  |
| [P66541]RS2_SALTY 30S ribosomal protein S2     | 6  |                      | ILFVGTK                             | 66  | 7  | 5  | 40.27  | b2y2y3y4y6                                              | 777.48  | 56.828  | 15971  | 2 | 389.24  | -8.95  |
| [P66541]RS2_SALTY 30S ribosomal protein S2     | 7  |                      | DLETQSQDGTFEK                       | 115 | 13 | 7  | 34.95  | b1b2y9y10°y10y11°y11                                    | 1497.69 | 39.745  | 11156  | 2 | 749.35  | 13.77  |
| [P66541]RS2_SALTY 30S ribosomal protein S2     | 8  |                      | YWNPK                               | 21  | 5  | 1  | 13.15  | b4                                                      | 707.36  | 21.569  | 12562  | 1 | 707.36  | 8.46   |
| [P66541]RS2_SALTY 30S ribosomal protein S2     | 9  |                      | EGRSQDLASQAEE SFVEAE                | 222 | 19 | 3  | 14.82  | b7y6y13                                                 | 2081.96 | 73.917  | 8909   | 2 | 1041.48 | 14.07  |
| [P66541]RS2_SALTY 30S ribosomal protein S2     | 10 | Oxidation+M(5)       | WLGGMLTNWK                          | 95  | 10 | 4  | 33.72  | y4°y4y6y7                                               | 1221.60 | 136.335 | 2794   | 1 | 1221.60 | -8.99  |
| [P66541]RS2_SALTY 30S ribosomal protein S2     | 11 | Oxidation+M(2)       | DMGGLPDALFVIDADHEHIAIK              | 152 | 22 | 3  | 22.08  | b13b14y7                                                | 2393.19 | 77.887  | 2500   | 4 | 599.05  | 2.35   |
| [P0A299]RL7_SALTY 50S ribosomal protein L7/L12 | 1  |                      | DQIIEAVSAMSVM DVVELISAMEE K         | 5   | 25 | 23 | 161.02 | b2°b2°b2b3b4b5b6b7b8b9°b9b10b20y2°y2y4y5y6y7y9°y9y10y25 | 2737.33 | 137.082 | 59058  | 3 | 913.11  | -2.50  |
| [P0A299]RL7_SALTY 50S ribosomal protein L7/L12 | 2  |                      | DLVESAPAALK                         | 85  | 11 | 6  | 35.06  | b4b8°b8y4y9y11                                          | 1113.60 | 52.978  | 35307  | 2 | 557.31  | -9.76  |
| [P0A299]RL7_SALTY 50S ribosomal protein L7/L12 | 3  |                      | EGVSKDDAEALK                        | 96  | 12 | 6  | 22.11  | b2°b2b3y7y9y12                                          | 1261.64 | 34.672  | 9362   | 2 | 631.32  | 11.61  |
| [P0A299]RL7_SALTY 50S ribosomal protein L7/L12 | 4  |                      | SLEEAGAEVEVK                        | 109 | 12 | 3  | 22.11  | b9b11y11                                                | 1260.63 | 48.481  | 4290   | 2 | 630.82  | 1.55   |
| [P0A299]RL7_SALTY 50S ribosomal protein L7/L12 | 5  |                      | SITKDQIIEAVSAMSVM DVVELISAMEEK      | 1   | 29 | 4  | 21.89  | b4b5°b5y21                                              | 3166.58 | 136.285 | 4048   | 3 | 1056.20 | -5.63  |
| [P0A299]RL7_SALTY 50S ribosomal protein L7/L12 | 6  |                      | EAKDLVESAPAALK                      | 82  | 14 | 4  | 15.52  | b5°b5b12y2                                              | 1441.79 | 60.591  | 3444   | 2 | 721.40  | 1.19   |
| [P0A299]RL7_SALTY 50S ribosomal protein L7/L12 | 7  |                      | VAVIK                               | 66  | 5  | 1  | 13.15  | y4                                                      | 529.37  | 25.604  | 2926   | 1 | 529.37  | -6.00  |
| [P0A299]RL7_SALTY 50S ribosomal protein L7/L12 | 8  |                      | AAGANK                              | 60  | 6  | 1  | 13.56  | b3                                                      | 531.29  | 29.827  | 2444   | 1 | 531.29  | 9.42   |
| [P0A299]RL7_SALTY 50S ribosomal protein L7/L12 | 9  |                      | SITKDQIIEAVSAMSVM DVVELISAMEEK      | 1   | 29 | 3  | 11.47  | b16y8y13                                                | 3166.62 | 114.125 | 8234   | 3 | 1056.21 | 9.17   |
| [P0A299]RL7_SALTY 50S ribosomal protein L7/L12 | 10 |                      | EGVSKDDAEALK                        | 96  | 12 | 3  | 22.11  | b3b11y11                                                | 1261.63 | 111.315 | 1679   | 2 | 631.32  | 2.81   |
| [P0A299]RL7_SALTY 50S ribosomal protein L7/L12 | 11 | Phosphoryl STY(5)    | DLVESAPAA LKEGVSK                   | 85  | 16 | 4  | 17.02  | b3°b3b11y11                                             | 1693.84 | 68.015  | 11040  | 3 | 565.29  | 7.28   |
| [P0A7X0]RS8_SALTY 30S ribosomal protein S8     | 1  |                      | SMQDPIADMLTR                        | 1   | 12 | 12 | 65.54  | b2b4y1y2y4y5°y5y6°y6y8y9y12                             | 1377.65 | 77.716  | 150120 | 2 | 689.33  | 1.95   |

|                                                       |    |                       |                             |     |    |    |        |                                              |         |         |       |   |         |        |
|-------------------------------------------------------|----|-----------------------|-----------------------------|-----|----|----|--------|----------------------------------------------|---------|---------|-------|---|---------|--------|
| [P0A7X0]RS8_SALTY 30S ribosomal protein S8            | 2  |                       | AAVTMPSSK                   | 22  | 9  | 10 | 67.39  | b2y2y3y4°y4y5y6y7°y7y9                       | 891.46  | 30.658  | 84900 | 2 | 446.23  | -4.11  |
| [P0A7X0]RS8_SALTY 30S ribosomal protein S8            | 3  |                       | AVVESIQR                    | 69  | 8  | 10 | 62.21  | b2b3y2*y2y3y4y5°y5y6y8                       | 901.50  | 32.155  | 77587 | 2 | 451.25  | -9.14  |
| [P0A7X0]RS8_SALTY 30S ribosomal protein S8            | 4  |                       | NGQAANKAAVTMPSSK            | 15  | 16 | 4  | 27.46  | b12y3y5y7                                    | 1574.82 | 112.004 | 3128  | 2 | 787.91  | 12.87  |
| [P0A7X0]RS8_SALTY 30S ribosomal protein S8            | 5  |                       | VTMPSSK                     | 24  | 7  | 0  | 1.64   |                                              | 749.39  | 30.610  | 14341 | 1 | 749.39  | 0.08   |
| [P0A7X0]RS8_SALTY 30S ribosomal protein S8            | 6  |                       | AVTMPSSK                    | 23  | 8  | 0  | 1.64   |                                              | 820.43  | 30.664  | 4733  | 2 | 410.72  | 6.99   |
| [O54297]RS4_SALTY 30S ribosomal protein S4            | 1  |                       | VVNIASYQVSPNDVVSIR          | 128 | 18 | 17 | 100.53 | b3b7*b7b9°b9*b9b17y3y5y7y8y9*y9y11*y13y14y18 | 1960.06 | 71.475  | 64488 | 2 | 980.53  | 5.98   |
| [O54297]RS4_SALTY 30S ribosomal protein S4            | 2  |                       | LSDYGVQLR                   | 47  | 9  | 7  | 44.7   | b2b3°b3b7y1y7y8                              | 1050.56 | 50.635  | 47807 | 2 | 525.78  | -1.05  |
| [O54297]RS4_SALTY 30S ribosomal protein S4            | 3  |                       | KPER                        | 184 | 4  | 1  | 12.74  | y3                                           | 529.31  | 44.621  | 19867 | 1 | 529.31  | -3.00  |
| [O54297]RS4_SALTY 30S ribosomal protein S4            | 4  |                       | MGFGATR                     | 104 | 7  | 3  | 40.27  | b6y3y5                                       | 739.35  | 35.594  | 7290  | 2 | 370.18  | -9.49  |
| [O54297]RS4_SALTY 30S ribosomal protein S4            | 5  |                       | AALELAEQR                   | 156 | 9  | 6  | 61.37  | b3y4y6°y6y7y8                                | 1000.54 | 42.784  | 5826  | 1 | 1000.54 | -1.28  |
| [O54297]RS4_SALTY 30S ribosomal protein S4            | 6  |                       | IEQAPGQHGAR                 | 33  | 11 | 5  | 65.2   | y4y5y6y7y8                                   | 1163.57 | 15.293  | 3909  | 3 | 388.53  | -17.73 |
| [O54297]RS4_SALTY 30S ribosomal protein S4            | 7  |                       | KPERSDLSADINEHLIVELYSK      | 184 | 22 | 4  | 13.33  | b11b14*b14y6                                 | 2556.30 | 96.837  | 2701  | 3 | 852.77  | -10.89 |
| [Q8ZKQ1]LSRB_SALTY Autoinducer 2-binding protein lsrB | 1  |                       | ISQHPGWEIVTTQFGYNDATK       | 177 | 22 | 6  | 26.75  | b10b11b22y4°y4y9                             | 2521.21 | 72.377  | 49060 | 3 | 841.07  | 2.42   |
| [Q8ZKQ1]LSRB_SALTY Autoinducer 2-binding protein lsrB | 2  |                       | AYPDLDAIIPDANALPAAQAEE NLKR | 209 | 28 | 8  | 51.42  | b2b8b9b10y6y10y12y19                         | 2863.50 | 86.911  | 48004 | 3 | 955.17  | 0.85   |
| [Q8ZKQ1]LSRB_SALTY Autoinducer 2-binding protein lsrB | 3  |                       | VAFFYSSPTVTDQNQWVK          | 154 | 18 | 7  | 46.5   | b10b12y3y11y12y13y18                         | 2117.05 | 77.044  | 26982 | 2 | 1059.03 | 5.42   |
| [Q8ZKQ1]LSRB_SALTY Autoinducer 2-binding protein lsrB | 4  |                       | NMPMNVGDSLDIPGIGK           | 284 | 17 | 7  | 29.71  | b12°b12b13y5y15*y15y17                       | 1757.87 | 78.923  | 26705 | 2 | 879.44  | 6.67   |
| [Q8ZKQ1]LSRB_SALTY Autoinducer 2-binding protein lsrB | 5  |                       | VTVSPNSEQGYHYEAK            | 301 | 16 | 12 | 55.74  | b6°b6b8b9°b9*b9y2y4y7y8y10y16                | 1808.83 | 35.926  | 24156 | 3 | 603.61  | -8.30  |
| [Q8ZKQ1]LSRB_SALTY Autoinducer 2-binding protein lsrB | 6  |                       | EFGLWDVVQQ GK               | 261 | 12 | 9  | 34.01  | b11*b11y2y3*y3y4*y4y8°y8                     | 1405.71 | 82.051  | 16159 | 2 | 703.36  | -2.00  |
| [Q8ZKQ1]LSRB_SALTY Autoinducer 2-binding protein lsrB | 7  |                       | LVGVGFFTSGGNGAQEAGK         | 35  | 19 | 8  | 51.4   | b10b11b14y3y10y13y18°y18                     | 1795.87 | 93.132  | 3550  | 2 | 898.44  | -14.21 |
| [Q8ZKQ1]LSRB_SALTY Autoinducer 2-binding protein lsrB | 8  | Carbamidomethyl+C(12) | ILTWSDTKPECR                | 111 | 13 | 3  | 27.96  | b6b11b12                                     | 1620.80 | 69.218  | 74524 | 2 | 810.90  | 19.81  |
| [Q8ZKQ1]LSRB_SALTY Autoinducer 2-binding protein lsrB | 9  |                       | MIALLTAFLASAAAMTVQAAER      | 7   | 22 | 5  | 30.42  | b3y3y5y10y16                                 | 2236.15 | 72.419  | 13525 | 2 | 1118.58 | -14.41 |
| [Q8ZKQ1]LSRB_SALTY Autoinducer 2-binding protein lsrB | 10 |                       | NGGIVLLPER                  | 317 | 10 | 3  | 36.73  | y3y4y5                                       | 1067.61 | 61.002  | 11199 | 2 | 534.31  | -8.00  |
| [Q8ZKQ1]LSRB_SALTY Autoinducer 2-binding protein lsrB | 11 |                       | NNLAIVGFSTPNVMRPYVQR        | 237 | 20 | 3  | 14.26  | b4b13y5                                      | 2276.21 | 112.792 | 10108 | 3 | 759.41  | 4.18   |
| [Q8ZKQ1]LSRB_SALTY Autoinducer 2-binding protein lsrB | 12 |                       | SYIINQGTPK                  | 124 | 10 | 7  | 57.8   | b4b7b8b9y5°y5*y5                             | 1170.59 | 39.887  | 2281  | 2 | 585.80  | 8.34   |
| [Q8ZKQ1]LSRB_SALTY Autoinducer 2-binding protein lsrB | 13 |                       | AKVAFFYSSPTVTDQNQWVK        | 152 | 20 | 3  | 14.26  | b8b14y7                                      | 2316.16 | 82.134  | 9230  | 2 | 1158.58 | -1.48  |
| [Q8ZKQ1]LSRB_SALTY Autoinducer 2-binding protein lsrB | 14 | Oxidation+M()         | QLGSMLEVMAAHQVDK            | 134 | 16 | 5  | 37.16  | b11y4y5°y5y6                                 | 1772.86 | 45.581  | 2712  | 3 | 591.63  | -1.51  |
| [Q8ZKQ1]LSRB_SALTY Autoinducer 2-binding protein lsrB | 15 |                       | ISQHPGWEIVTTQFGYNDATK       | 177 | 22 | 0  | 6.98   |                                              | 2503.19 | 72.373  | 8342  | 3 | 835.07  | 1.76   |
| [P66643]RS9_SALTY 30S ribosomal protein S9            | 1  |                       | SLEQYFGR                    | 33  | 8  | 6  | 49.06  | b4y3y4y6°y6y8                                | 999.49  | 60.212  | 72233 | 2 | 500.25  | -2.63  |
| [P66643]RS9_SALTY 30S ribosomal protein S9            | 2  |                       | AENQYYGTGR                  | 1   | 10 | 7  | 51.64  | b1y4y5y6y8*y8y10                             | 1158.52 | 26.273  | 54759 | 2 | 579.76  | -0.32  |

|                                                           |    |  |                               |     |    |    |       |                                |         |         |       |   |         |        |
|-----------------------------------------------------------|----|--|-------------------------------|-----|----|----|-------|--------------------------------|---------|---------|-------|---|---------|--------|
| P66643 RS9_SALTY 30S ribosomal protein S9                 | 3  |  | GGGISGQAGAIR                  | 68  | 12 | 9  | 43.85 | b2b3b11y2y5y7y8°y8y12          | 1043.55 | 32.826  | 50568 | 2 | 522.28  | -5.50  |
| P66643 RS9_SALTY 30S ribosomal protein S9                 | 4  |  | SLEQYFGRETAR                  | 33  | 12 | 3  | 26.09 | b3y4y5                         | 1456.73 | 55.779  | 5027  | 3 | 486.25  | 11.06  |
| P66643 RS9_SALTY 30S ribosomal protein S9                 | 5  |  | AGFVTRDAR                     | 100 | 9  | 3  | 30.3  | b4y7y8                         | 992.52  | 84.839  | 21175 | 2 | 496.76  | -6.09  |
| P66643 RS9_SALTY 30S ribosomal protein S9                 | 6  |  | AENQYYGTGRR                   | 1   | 11 | 3  | 27.14 | b7y9y10                        | 1314.61 | 50.439  | 8292  | 2 | 657.81  | -5.57  |
| P66643 RS9_SALTY 30S ribosomal protein S9                 | 7  |  | ALMEYDESLRGELR                | 85  | 14 | 3  | 26.91 | b9b10b13                       | 1681.80 | 79.690  | 5372  | 3 | 561.27  | -14.37 |
| P66643 RS9_SALTY 30S ribosomal protein S9                 | 8  |  | SLEQYFG                       | 33  | 7  | 0  | 1.23  |                                | 843.40  | 60.289  | 9102  | 1 | 843.40  | 8.68   |
| P23905 DGAL_SALTY D-galactose-binding periplasmic protein | 1  |  | SSIPVFGVDALPEALALVK           | 250 | 19 | 7  | 42.25 | y2y3y4y8y13y16y19              | 1926.10 | 107.255 | 36163 | 2 | 963.55  | 3.80   |
| P23905 DGAL_SALTY D-galactose-binding periplasmic protein | 2  |  | ALAINLVDPAAGTVIEK             | 84  | 18 | 5  | 24.62 | b3y2y7y11y14                   | 1766.01 | 79.741  | 27583 | 2 | 883.51  | 4.84   |
| P23905 DGAL_SALTY D-galactose-binding periplasmic protein | 3  |  | SGAMAGTVLNDANNQAK             | 269 | 17 | 11 | 96.17 | b3b9b10b13y7°y7y8y9y10y12y13   | 1661.80 | 45.596  | 26302 | 2 | 831.40  | 5.80   |
| P23905 DGAL_SALTY D-galactose-binding periplasmic protein | 4  |  | HWQANQGWDLNK                  | 148 | 12 | 6  | 22.11 | b7b11y2y6°y6y12                | 1496.71 | 75.772  | 8556  | 3 | 499.58  | 5.38   |
| P23905 DGAL_SALTY D-galactose-binding periplasmic protein | 5  |  | SAPDVQLLMNDSQNDQSK            | 52  | 18 | 6  | 41.65 | b6b7b10y8y10y13                | 1989.96 | 75.845  | 46203 | 2 | 995.48  | 20.80  |
| P23905 DGAL_SALTY D-galactose-binding periplasmic protein | 6  |  | ALDSYDK                       | 120 | 7  | 5  | 50.41 | b3b4°b4b6y3                    | 811.40  | 71.433  | 3383  | 1 | 811.40  | 19.18  |
| P23905 DGAL_SALTY D-galactose-binding periplasmic protein | 7  |  | TTYVVKELNDK                   | 181 | 11 | 4  | 27.14 | b3b4y5°y5                      | 1309.69 | 75.801  | 87620 | 2 | 655.35  | -11.09 |
| P23905 DGAL_SALTY D-galactose-binding periplasmic protein | 8  |  | ELNDKGIQTEQLALDTAMWDTAQAK     | 187 | 25 | 3  | 12.32 | b6b10y5                        | 2790.38 | 124.286 | 9532  | 3 | 930.80  | 5.34   |
| P23905 DGAL_SALTY D-galactose-binding periplasmic protein | 9  |  | ESGVIQGDLIAKHWQANQGWDLNK      | 136 | 24 | 3  | 22.91 | b3b4b13                        | 2707.35 | 104.970 | 7967  | 2 | 1354.18 | -4.42  |
| P23905 DGAL_SALTY D-galactose-binding periplasmic protein | 10 |  | DGKSAPDVQLLMNDSQNDQSK         | 49  | 21 | 3  | 13.77 | b6b11y3                        | 2290.06 | 58.685  | 7563  | 3 | 764.02  | -0.64  |
| P23905 DGAL_SALTY D-galactose-binding periplasmic protein | 11 |  | NLAEGKGAADGTSWK               | 293 | 15 | 3  | 26.07 | b5b10b11                       | 1504.72 | 101.706 | 5531  | 3 | 502.24  | -12.82 |
| Q8ZQT5 TOLB_SALTY Protein tolB                            | 1  |  | VSDYDGYNQFVVHR                | 183 | 14 | 6  | 38.51 | b1y3y10*y10y11y13              | 1698.77 | 53.636  | 96312 | 3 | 566.93  | -12.07 |
| Q8ZQT5 TOLB_SALTY Protein tolB                            | 2  |  | SNNTEPTWFPDSQTLAFTSDQAGRPQVYK | 287 | 29 | 11 | 24.03 | b2b5°b5y1y2y12y14y22y24°y24y29 | 3285.54 | 76.919  | 70386 | 3 | 1095.85 | -2.15  |
| Q8ZQT5 TOLB_SALTY Protein tolB                            | 3  |  | IEITQGVSARPIGVVPPFK           | 24  | 19 | 7  | 14.82 | b2b9y1y2y3y16y19               | 2026.12 | 70.022  | 48348 | 3 | 676.05  | -6.09  |
| Q8ZQT5 TOLB_SALTY Protein tolB                            | 4  |  | WAGPGAAPEDIGGIVAADLR          | 43  | 20 | 10 | 72.37 | b5b6b7b8y2y5y6y9y13y20         | 1936.00 | 84.856  | 43435 | 2 | 968.50  | 2.96   |
| Q8ZQT5 TOLB_SALTY Protein tolB                            | 5  |  | LPATDGQVK                     | 413 | 9  | 6  | 54.24 | y2y4y6y7y8y9                   | 928.51  | 27.109  | 38054 | 2 | 464.76  | -1.84  |
| Q8ZQT5 TOLB_SALTY Protein tolB                            | 6  |  | MNINGGAAQR                    | 316 | 10 | 9  | 42.89 | b2*b2b3y1y6y7*y7y8y10          | 1031.51 | 27.233  | 29341 | 2 | 516.26  | 2.84   |
| Q8ZQT5 TOLB_SALTY Protein tolB                            | 7  |  | LAYVTFESGR                    | 213 | 10 | 4  | 26.73 | b9y4y9y10                      | 1142.58 | 57.287  | 28948 | 2 | 571.79  | -7.05  |



|                                             |    |                   |                                            |     |    |    |        |                                                         |         |         |        |   |         |        |
|---------------------------------------------|----|-------------------|--------------------------------------------|-----|----|----|--------|---------------------------------------------------------|---------|---------|--------|---|---------|--------|
| Q8ZQT5 TOLB_SALTY Protein tolB              | 8  |                   | SALVIQTLANGAVR                             | 223 | 14 | 5  | 38.3   | b3y2y9y10y11                                            | 1412.82 | 70.338  | 25404  | 2 | 706.91  | -0.26  |
| Q8ZQT5 TOLB_SALTY Protein tolB              | 9  |                   | SPQPLMSPAWSPDGSK                           | 197 | 16 | 4  | 17.02  | b2b14y3y10                                              | 1684.82 | 46.983  | 9605   | 3 | 562.28  | 12.61  |
| Q8ZQT5 TOLB_SALTY Protein tolB              | 10 |                   | YAGHTASDEVFEK                              | 142 | 13 | 3  | 20.48  | b3b5y9                                                  | 1453.66 | 37.905  | 32059  | 3 | 485.22  | -2.94  |
| Q8ZQT5 TOLB_SALTY Protein tolB              | 11 |                   | TGSLNLYVMDLASGQIR                          | 264 | 17 | 3  | 23.58  | b3b6b8                                                  | 1837.94 | 63.473  | 3334   | 3 | 613.32  | -4.91  |
| Q8ZQT5 TOLB_SALTY Protein tolB              | 12 |                   | LPATDGQVKSPAWSPYL                          | 413 | 17 | 3  | 16.18  | b8y4y12                                                 | 1829.97 | 88.346  | 110539 | 3 | 610.66  | 13.54  |
| Q8ZQT5 TOLB_SALTY Protein tolB              | 13 |                   | TRIAYVVQTNGGQFPYELR                        | 164 | 19 | 6  | 36.09  | b4y10y11*y11y12°y12                                     | 2212.15 | 90.162  | 44847  | 3 | 738.06  | 0.99   |
| Q8ZQT5 TOLB_SALTY Protein tolB              | 14 |                   | ITWEGSQNQDADVSSDGKFMVM<br>VSSNNGQQHIAK     | 326 | 34 | 3  | 10.96  | b5b16y10                                                | 3708.70 | 96.053  | 20112  | 3 | 1236.91 | 0.33   |
| Q8ZQT5 TOLB_SALTY Protein tolB              | 15 |                   | SNNTPTWFPDSQTLAFTSDQAG<br>RPQVYKMNINGGAAQR | 287 | 39 | 4  | 21.58  | y6y8y11y15                                              | 4298.05 | 105.634 | 3860   | 3 | 1433.36 | 5.34   |
| Q8ZQT5 TOLB_SALTY Protein tolB              | 16 |                   | TGSLNLYVMDLASGQIRQITDGR                    | 264 | 23 | 3  | 12.95  | b6b13y11                                                | 2508.30 | 73.365  | 3363   | 2 | 1254.65 | 4.77   |
| Q8ZQT5 TOLB_SALTY Protein tolB              | 17 | Phosphoryl STY(7) | IAYVVQTNGGQFPYELR                          | 166 | 17 | 3  | 24.83  | y5y9y10                                                 | 2034.98 | 106.416 | 1736   | 2 | 1018.00 | 12.30  |
| Q8ZQT5 TOLB_SALTY Protein tolB              | 18 |                   | VIQTLANGAVR                                | 226 | 11 | 0  | 3.7    |                                                         | 1141.65 | 70.430  | 34282  | 2 | 571.33  | -13.58 |
| Q56073 DNAK_SALTY Chaperone<br>protein dnaK | 1  |                   | IINEPTAAALAYGLDKEVGNR                      | 167 | 21 | 12 | 68.72  | b1b2b3y1y5y6y7y10y12y1<br>7y19y21                       | 2215.16 | 74.294  | 66322  | 3 | 739.06  | -5.73  |
| Q56073 DNAK_SALTY Chaperone<br>protein dnaK | 2  |                   | SLGQFNLDGINPAPR                            | 452 | 15 | 18 | 137.29 | b2°b2b4°b4b8b14y1y4y5y7<br>y8°y8y10*y10y11y13y14y1<br>5 | 1598.84 | 71.368  | 38241  | 2 | 799.92  | 5.57   |
| Q56073 DNAK_SALTY Chaperone<br>protein dnaK | 3  |                   | ASSGLNEEEIQK                               | 502 | 12 | 9  | 81.77  | b1y3y5y7°y7y8y9y10y12                                   | 1304.63 | 33.956  | 26479  | 2 | 652.82  | -0.37  |
| Q56073 DNAK_SALTY Chaperone<br>protein dnaK | 4  |                   | MQELAQVSQK                                 | 587 | 10 | 6  | 47.66  | b2b3y3y6y8y10                                           | 1161.59 | 36.546  | 24056  | 2 | 581.30  | -0.84  |
| Q56073 DNAK_SALTY Chaperone<br>protein dnaK | 5  |                   | TAEDYLGPVTEAVITVPAYFNDA<br>QR              | 125 | 26 | 9  | 54.56  | b6b7y1y5y6y8y9y16y26                                    | 2869.39 | 92.879  | 20357  | 3 | 957.14  | 0.68   |
| Q56073 DNAK_SALTY Chaperone<br>protein dnaK | 6  |                   | FQDEEVQR                                   | 76  | 8  | 4  | 40.68  | y4y6y7*y7                                               | 1050.48 | 27.687  | 14312  | 2 | 525.74  | -8.02  |
| Q56073 DNAK_SALTY Chaperone<br>protein dnaK | 7  |                   | NDPLAMQR                                   | 253 | 8  | 5  | 49.06  | b5y4y6y7y8                                              | 944.46  | 38.843  | 10009  | 2 | 472.73  | -4.07  |
| Q56073 DNAK_SALTY Chaperone<br>protein dnaK | 8  |                   | QAVTNPQNTLFAIK                             | 56  | 14 | 3  | 19.13  | b3b7y11                                                 | 1544.84 | 66.843  | 9686   | 2 | 772.93  | 0.63   |
| Q56073 DNAK_SALTY Chaperone<br>protein dnaK | 9  |                   | DDDVVDAEFEEVKDK                            | 622 | 15 | 3  | 26.07  | y5y7y12                                                 | 1752.81 | 71.213  | 8537   | 2 | 876.91  | 14.35  |
| Q56073 DNAK_SALTY Chaperone<br>protein dnaK | 10 |                   | TIAYVDLGGGTFDISIIEIDEVDGE<br>K             | 188 | 26 | 6  | 36.02  | b7b8y4y5°y5y8                                           | 2769.32 | 119.099 | 43554  | 3 | 923.78  | -19.75 |
| Q56073 DNAK_SALTY Chaperone<br>protein dnaK | 11 |                   | SIEPLK                                     | 315 | 6  | 1  | 13.56  | b3                                                      | 686.42  | 51.697  | 17301  | 1 | 686.42  | 12.09  |
| Q56073 DNAK_SALTY Chaperone<br>protein dnaK | 12 |                   | LMEIAQQQHAQQAGSADASAN<br>NAK               | 597 | 25 | 4  | 12.32  | b13*b13y4y6                                             | 2610.21 | 84.729  | 4403   | 3 | 870.74  | -7.01  |
| Q56073 DNAK_SALTY Chaperone<br>protein dnaK | 13 |                   | VLENAEGDR                                  | 25  | 9  | 3  | 38.08  | y3y4y5                                                  | 1002.49 | 22.080  | 3492   | 2 | 501.75  | 7.91   |
| Q56073 DNAK_SALTY Chaperone<br>protein dnaK | 14 |                   | AAIEAK                                     | 581 | 6  | 1  | 13.56  | y5                                                      | 602.35  | 30.701  | 2478   | 1 | 602.35  | -4.36  |
| Q56073 DNAK_SALTY Chaperone<br>protein dnaK | 15 |                   | SIEPLKVALQDAGLSVSDINDVILV<br>GGQTR         | 315 | 30 | 4  | 21.93  | b15y5°y5y6                                              | 3107.69 | 104.215 | 33761  | 3 | 1036.57 | -2.44  |
| Q56073 DNAK_SALTY Chaperone<br>protein dnaK | 16 |                   | DQGIDLRNDPLAMQR                            | 246 | 15 | 3  | 26.07  | b8b9b14                                                 | 1741.89 | 71.750  | 10597  | 2 | 871.45  | 14.23  |
| Q56073 DNAK_SALTY Chaperone<br>protein dnaK | 17 |                   | VLENAEGDRTPPSIIAYTDGETL<br>VGQPAK          | 25  | 30 | 5  | 29.73  | b6b13b26y11y12                                          | 3173.62 | 69.941  | 5278   | 3 | 1058.54 | 6.15   |
| Q56073 DNAK_SALTY Chaperone<br>protein dnaK | 18 |                   | MQELAQVSQKLMEIAQQQHAQQ<br>QAGSADASANNAK    | 587 | 35 | 4  | 14.99  | b14y5y8y13                                              | 3752.80 | 114.734 | 3623   | 4 | 938.96  | -1.43  |

|                                                      |    |                                                                    |                                      |     |    |    |        |                                            |         |         |       |   |         |        |
|------------------------------------------------------|----|--------------------------------------------------------------------|--------------------------------------|-----|----|----|--------|--------------------------------------------|---------|---------|-------|---|---------|--------|
| Q56073 DNAK_SALTY Chaperone protein dnaK             | 19 | Carbamidomethyl+C(14)                                              | GKIIGIDLGTNSCVAIMDGTQAR              | 1   | 24 | 5  | 35.31  | b22y7y8°y8y9                               | 2491.29 | 128.088 | 1850  | 3 | 831.10  | 11.07  |
| Q56073 DNAK_SALTY Chaperone protein dnaK             | 20 | Phosphoryl STY(9)                                                  | TTPSIIAYTQDGETLVGQPAK                | 34  | 21 | 3  | 13.77  | b3b8y11                                    | 2270.07 | 82.875  | 27394 | 3 | 757.36  | -8.60  |
| P0A1P8 GLRX1_SALTY Glutaredoxin-1                    | 1  | Carbamidomethyl+C(11)<br>;Carbamidomethyl+C(14)                    | MFTVIFGRPGCPYCVR                     | 0   | 16 | 3  | 25.39  | b3b4b8                                     | 1959.92 | 76.998  | 44880 | 3 | 653.98  | -10.03 |
| P0A1P8 GLRX1_SALTY Glutaredoxin-1                    | 2  |                                                                    | TVGKPVETVPQIFVDQK                    | 50  | 17 | 9  | 45.42  | b3b9y2*y2y3y6y8y13y17                      | 1885.02 | 64.582  | 39712 | 3 | 629.01  | -11.53 |
| P0A1P8 GLRX1_SALTY Glutaredoxin-1                    | 3  | Carbamidomethyl+C(5)                                               | HIGGCTDFEAWAKENLNLFA                 | 67  | 20 | 3  | 22.39  | b3b4y11                                    | 2293.08 | 83.033  | 1963  | 2 | 1147.04 | 3.94   |
| P0A1P8 GLRX1_SALTY Glutaredoxin-1                    | 4  | Carbamidomethyl+C(11)<br>;Carbamidomethyl+C(14)<br>;Oxidation+M(1) | MFTVIFGRPGCPYCVR                     | 0   | 16 | 4  | 38.66  | y5y9y11y13                                 | 1975.93 | 73.973  | 31644 | 3 | 659.31  | -3.46  |
| P0A1P8 GLRX1_SALTY Glutaredoxin-1                    | 5  | Carbamidomethyl+C(4)                                               | IGGCTDFEAWAKENLNLFA                  | 68  | 19 | 0  | 6.16   |                                            | 2155.99 | 83.027  | 22239 | 3 | 719.34  | -9.06  |
| P0A1P8 GLRX1_SALTY Glutaredoxin-1                    | 6  |                                                                    | PQIFVDQK                             | 59  | 8  | 0  | 4.93   |                                            | 974.53  | 64.471  | 5153  | 1 | 974.53  | 3.13   |
| P22107 TRAT_SALTY TraT complement resistance protein | 1  |                                                                    | ATVTTDNVAALR                         | 177 | 12 | 9  | 75.38  | b9b11y3y4y8y9y10y12*y12                    | 1231.66 | 44.852  | 31831 | 2 | 616.34  | -0.59  |
| P22107 TRAT_SALTY TraT complement resistance protein | 2  |                                                                    | IQTSTETGNQHK                         | 196 | 12 | 13 | 83.46  | b2b3y2y5*y5y6y7°y7*y7y8°y8y9y10            | 1343.64 | 14.097  | 14385 | 3 | 448.55  | -12.90 |
| P22107 TRAT_SALTY TraT complement resistance protein | 3  |                                                                    | GYTVVTSPDK                           | 79  | 10 | 4  | 36.73  | y2y5y6y7                                   | 1066.54 | 35.586  | 2378  | 1 | 1066.54 | -4.58  |
| P22107 TRAT_SALTY TraT complement resistance protein | 4  |                                                                    | ESQGWLNR                             | 107 | 8  | 4  | 35.91  | b4b6°b6y7                                  | 989.47  | 107.486 | 1630  | 1 | 989.47  | -10.55 |
| P22107 TRAT_SALTY TraT complement resistance protein | 5  |                                                                    | DIQAKGYTVVTSPDK                      | 74  | 15 | 5  | 31.6   | b3b13*b13y4y5                              | 1621.82 | 67.988  | 26239 | 2 | 811.42  | -11.89 |
| P22107 TRAT_SALTY TraT complement resistance protein | 6  |                                                                    | IQTSTETGNQHKYQTR                     | 196 | 16 | 5  | 23.55  | b5°b5*b5b6y12                              | 1891.94 | 58.936  | 4964  | 2 | 946.47  | 7.03   |
| P22107 TRAT_SALTY TraT complement resistance protein | 7  | Carbamidomethyl+C(16)<br>;Phosphoryl STY(5)                        | LMMVTLVSSTLALSGCGAMSTAI<br>KK        | 5   | 25 | 4  | 21.86  | b3b4y11°y11                                | 2650.27 | 136.229 | 5593  | 3 | 884.10  | -10.87 |
| P22107 TRAT_SALTY TraT complement resistance protein | 8  | Carbamidomethyl+C(16)<br>;Oxidation+M()                            | LMMVTLVSSTLALSGCGAMSTAI<br>KK        | 5   | 25 | 5  | 18.68  | b3b8b16y10°y10                             | 2586.33 | 102.497 | 2088  | 3 | 862.78  | -3.87  |
| P22107 TRAT_SALTY TraT complement resistance protein | 9  |                                                                    | TSTETGNQHK                           | 198 | 10 | 0  | 2.88   |                                            | 1102.51 | 14.097  | 1607  | 2 | 551.76  | -1.99  |
| Q8ZKP7 TPIS_SALTY Triosephohate isomerase            | 1  |                                                                    | DIGAQYIIHGSERR                       | 84  | 15 | 9  | 52     | b3b12°b12y4y6y8y10°y10y15                  | 1727.91 | 58.677  | 79794 | 3 | 576.64  | -4.52  |
| Q8ZKP7 TPIS_SALTY Triosephohate isomerase            | 2  |                                                                    | SATPAQAQAVHK                         | 176 | 12 | 18 | 124.37 | b2b3b5°b5b11y12y4y5*y5y6*y6y7*y7y8y9y10y12 | 1208.64 | 17.590  | 75906 | 2 | 604.82  | -2.53  |
| Q8ZKP7 TPIS_SALTY Triosephohate isomerase            | 3  | Carbamidomethyl+C(8)                                               | ELTGVAGCDVAIAPPEMYIDLAKR             | 28  | 24 | 7  | 42.56  | b17y4y10y11y12y19y24                       | 2589.30 | 82.176  | 67634 | 3 | 863.77  | -3.39  |
| Q8ZKP7 TPIS_SALTY Triosephohate isomerase            | 4  |                                                                    | TQGAAAFEGAVIAYEPVWAIGTG<br>K         | 152 | 24 | 15 | 51.28  | b1b2*b2b3b5°b5b11b12b14y1y2y7y11y12y24     | 2407.24 | 93.098  | 21004 | 2 | 1204.12 | 4.97   |
| Q8ZKP7 TPIS_SALTY Triosephohate isomerase            | 5  | Carbamidomethyl+C(8)                                               | ELTGVAGCDVAIAPPEMYIDLAK              | 28  | 23 | 4  | 23.04  | y3y10y11y23                                | 2433.21 | 87.535  | 13642 | 2 | 1217.11 | 3.81   |
| Q8ZKP7 TPIS_SALTY Triosephohate isomerase            | 6  | Carbamidomethyl+C(14)                                              | FAVLKEQGLTPVLCIGETEAENEA<br>GK       | 112 | 26 | 5  | 18.21  | y1y7°y7y9y14                               | 2803.38 | 114.876 | 10768 | 3 | 935.13  | -12.80 |
| Q8ZKP7 TPIS_SALTY Triosephohate isomerase            | 7  |                                                                    | AAAGSHIMLGAQNVDLNLGSAFT<br>GETSAEMLK | 52  | 32 | 3  | 11.11  | b3y11y15                                   | 3204.54 | 87.757  | 2578  | 5 | 641.71  | -9.52  |
| Q8ZKP7 TPIS_SALTY Triosephohate isomerase            | 8  |                                                                    | DIGAQYIIHGSER                        | 84  | 14 | 6  | 48.14  | b3b4b6b7y6°y6                              | 1571.79 | 39.942  | 4202  | 3 | 524.60  | -20.66 |

|                                           |    |                                             |                               |     |    |    |        |                                                                           |         |         |        |   |         |        |
|-------------------------------------------|----|---------------------------------------------|-------------------------------|-----|----|----|--------|---------------------------------------------------------------------------|---------|---------|--------|---|---------|--------|
| Q8ZKP7 TPIS_SALTY Triosephohate isomerase | 9  | Carbamidomethyl+C(9); Carbamidomethyl+C(26) | EQGLTPVLCIGETEAENEAGKTEE VCAR | 117 | 28 | 26 | 232.59 | b5°b5b6b7°b7b11b12b25y3y4y5y7y10y12y13*y13y14y15y16y18y20y21y23°y23y24y26 | 3090.44 | 71.525  | 187126 | 3 | 1030.82 | 1.58   |
| Q8ZKP7 TPIS_SALTY Triosephohate isomerase | 10 |                                             | DIGAQYIIIGHSERR               | 84  | 15 | 5  | 42.83  | b4b5b7y5y6                                                                | 1727.92 | 112.856 | 10660  | 2 | 864.46  | 0.78   |
| Q8ZKP7 TPIS_SALTY Triosephohate isomerase | 11 | Oxidation+M(5)                              | HPLVMGNWK                     | 2   | 9  | 4  | 44.7   | b5b6y4y6                                                                  | 1097.55 | 67.113  | 2530   | 2 | 549.28  | -4.78  |
| Q8ZKP7 TPIS_SALTY Triosephohate isomerase | 12 | Carbamidomethyl+C(8); Oxidation+M(17)       | ELTGVAGCDVAIAPPEMYIDLAKR      | 28  | 24 | 4  | 19.29  | b7b14b18y10                                                               | 2605.27 | 89.224  | 1595   | 3 | 869.10  | -9.75  |
| Q8ZKP7 TPIS_SALTY Triosephohate isomerase | 13 |                                             | TPAQQAQAVHK                   | 178 | 10 | 7  | 44.68  | b3°b3b4°b4°b4b7b9                                                         | 1050.56 | 17.596  | 30268  | 2 | 525.78  | -8.02  |
| Q8ZKP7 TPIS_SALTY Triosephohate isomerase | 14 |                                             | PAQAQAVHK                     | 179 | 9  | 9  | 78.76  | b3b4°b4b5b6°b6b7°b7b8                                                     | 949.51  | 17.597  | 29074  | 2 | 475.26  | -8.93  |
| Q8ZKP7 TPIS_SALTY Triosephohate isomerase | 15 |                                             | SATPAQAQAVHK                  | 176 | 12 | 0  | 2.88   |                                                                           | 1190.61 | 17.608  | 24336  | 3 | 397.54  | -13.23 |
| P06179 FLIC_SALTY Flagellin               | 1  |                                             | AQILQQAGTSVLAQANQVPQNVLSLLR   | 468 | 27 | 11 | 43.97  | b2°b2b3b4b6b7b18y1y4y9y27                                                 | 2860.61 | 104.739 | 92342  | 3 | 954.21  | 2.65   |
| P06179 FLIC_SALTY Flagellin               | 2  |                                             | SQSALGTAIER                   | 20  | 11 | 8  | 65.2   | b2y3y6y7y8y9°y9y11                                                        | 1132.59 | 41.443  | 45123  | 2 | 566.80  | -4.31  |
| P06179 FLIC_SALTY Flagellin               | 3  |                                             | VSGQTQFNGVK                   | 125 | 11 | 6  | 27.14  | b9y9*y9y10*y10y11                                                         | 1164.60 | 32.535  | 40923  | 2 | 582.80  | -3.88  |
| P06179 FLIC_SALTY Flagellin               | 4  |                                             | INSAKDDAAGQAIANR              | 37  | 16 | 11 | 88.85  | b3°b3b6b11y3y4y5y6y10*y10y11                                              | 1614.80 | 29.782  | 36400  | 3 | 538.94  | -9.00  |
| P06179 FLIC_SALTY Flagellin               | 5  |                                             | AQVINTNSLSLLTQNNLNK           | 1   | 19 | 7  | 21.77  | b2°b2y2y7y12y15y19                                                        | 2085.14 | 73.959  | 35242  | 2 | 1043.07 | 3.86   |
| P06179 FLIC_SALTY Flagellin               | 6  |                                             | FNSAITNLGNTVNNLTSAR           | 432 | 19 | 6  | 23.46  | b2b3b7b14y11y19                                                           | 2007.03 | 77.850  | 30678  | 2 | 1004.02 | 3.41   |
| P06179 FLIC_SALTY Flagellin               | 7  |                                             | IDAALAQVDTLR                  | 411 | 12 | 6  | 34.01  | b2b4y4y6y7y12                                                             | 1285.71 | 60.671  | 24450  | 2 | 643.36  | -0.47  |
| P06179 FLIC_SALTY Flagellin               | 8  |                                             | AQPDLAEEAAATTENPLQK           | 392 | 19 | 5  | 20.51  | b9b11y7°y7y15                                                             | 1968.98 | 94.040  | 101007 | 2 | 984.99  | -2.42  |
| P06179 FLIC_SALTY Flagellin               | 9  |                                             | QINSQTLGLDTLNVQQK             | 161 | 17 | 4  | 23.58  | y8y12y14°y14                                                              | 1899.99 | 64.713  | 26488  | 2 | 950.50  | -10.60 |
| P06179 FLIC_SALTY Flagellin               | 10 |                                             | VSDTAATVTGYADTTIALDNSTFK      | 180 | 24 | 4  | 12.62  | b7°b7b12y13                                                               | 2462.18 | 91.331  | 26106  | 3 | 821.40  | -5.35  |
| P06179 FLIC_SALTY Flagellin               | 11 |                                             | DGSISINTTK                    | 339 | 10 | 4  | 39.88  | b3b4b9y6                                                                  | 1035.53 | 114.705 | 8984   | 2 | 518.27  | -5.78  |
| P06179 FLIC_SALTY Flagellin               | 12 |                                             | FTANIK                        | 53  | 6  | 1  | 13.56  | y5                                                                        | 693.39  | 33.600  | 6670   | 2 | 347.20  | -10.83 |
| P06179 FLIC_SALTY Flagellin               | 13 |                                             | LGGADGKTEVVSIGGK              | 363 | 16 | 3  | 17.02  | b12y5y8                                                                   | 1487.79 | 42.344  | 29361  | 3 | 496.60  | -11.73 |
| P06179 FLIC_SALTY Flagellin               | 14 |                                             | IDGDLKFDDTTGK                 | 216 | 13 | 5  | 29.44  | b5b8y10°y10y12                                                            | 1424.71 | 64.494  | 13807  | 2 | 712.86  | 14.14  |
| P06179 FLIC_SALTY Flagellin               | 15 |                                             | DGSISINTTKYTADDGTSK           | 339 | 19 | 4  | 14.82  | b6°b6b11y5                                                                | 1973.93 | 84.858  | 8336   | 3 | 658.65  | 0.12   |
| P06179 FLIC_SALTY Flagellin               | 16 |                                             | YKVSDTAATVTGYADTTIALDNS TFK   | 178 | 26 | 3  | 12.06  | b5y6y14                                                                   | 2753.34 | 110.195 | 7004   | 3 | 918.45  | -5.94  |
| P06179 FLIC_SALTY Flagellin               | 17 |                                             | TYAASKAEGHNFK                 | 379 | 13 | 3  | 20.48  | b4b7y9                                                                    | 1423.70 | 58.421  | 3714   | 3 | 475.24  | 3.09   |
| P06179 FLIC_SALTY Flagellin               | 18 | Phosphoryl STY(11)                          | FNSAITNLGNTVNNLTSAR           | 432 | 19 | 5  | 23.46  | b8y7y9°y9y13_H3PO4 y13                                                    | 2087.01 | 122.828 | 3860   | 2 | 1044.01 | 11.35  |
| P52616 FLJB_SALTY Phase 2 flagellin       | 1  |                                             | AQILQQAGTSVLAQANQVPQNVLSLLR   | 479 | 27 | 11 | 43.97  | b2°b2b3b4b6b7b18y1y4y9y27                                                 | 2860.61 | 104.739 | 92342  | 3 | 954.21  | 2.65   |
| P52616 FLJB_SALTY Phase 2 flagellin       | 2  |                                             | SQSALGTAIER                   | 20  | 11 | 8  | 65.2   | b2y3y6y7y8y9°y9y11                                                        | 1132.59 | 41.443  | 45123  | 2 | 566.80  | -4.31  |
| P52616 FLJB_SALTY Phase 2 flagellin       | 3  |                                             | TAANQLGGVDGK                  | 369 | 12 | 8  | 63.99  | b8b9b10°b10b11y4y7y12                                                     | 1130.58 | 35.938  | 41217  | 2 | 565.79  | -1.51  |
| P52616 FLJB_SALTY Phase 2 flagellin       | 4  |                                             | VSGQTQFNGVK                   | 125 | 11 | 6  | 27.14  | b9y9*y9y10*y10y11                                                         | 1164.60 | 32.535  | 40923  | 2 | 582.80  | -3.88  |
| P52616 FLJB_SALTY Phase 2 flagellin       | 5  |                                             | INSAKDDAAGQAIANR              | 37  | 16 | 11 | 88.85  | b3°b3b6b11y3y4y5y6y10*y10y11                                              | 1614.80 | 29.782  | 36400  | 3 | 538.94  | -9.00  |
| P52616 FLJB_SALTY Phase 2 flagellin       | 6  |                                             | AQVINTNSLSLLTQNNLNK           | 1   | 19 | 7  | 21.77  | b2°b2y2y7y12y15y19                                                        | 2085.14 | 73.959  | 35242  | 2 | 1043.07 | 3.86   |
| P52616 FLJB_SALTY Phase 2 flagellin       | 7  |                                             | YFVTIGGFTGADAAK               | 234 | 15 | 3  | 17.99  | b12b14y14                                                                 | 1517.76 | 72.855  | 70474  | 2 | 759.39  | 0.64   |
| P52616 FLJB_SALTY Phase 2 flagellin       | 8  |                                             | AYANNGTTLDVSGLDAAIK           | 189 | 20 | 4  | 21.05  | y3y8°y8y19                                                                | 2008.94 | 73.193  | 24683  | 3 | 670.32  | -19.14 |
| P52616 FLJB_SALTY Phase 2 flagellin       | 9  |                                             | DDAAGQAIANR                   | 42  | 11 | 3  | 27.14  | b3y8y9                                                                    | 1101.52 | 27.110  | 11844  | 2 | 551.27  | -3.55  |

|                                                |    |                   |                                                        |     |    |    |       |                                        |         |         |       |   |         |        |
|------------------------------------------------|----|-------------------|--------------------------------------------------------|-----|----|----|-------|----------------------------------------|---------|---------|-------|---|---------|--------|
| P52616 FLJB_SALTY Phase 2 flagellin            | 10 |                   | AQPELAEEAAK                                            | 403 | 11 | 4  | 31.12 | b3b5°b5b6                              | 1098.56 | 59.009  | 6962  | 2 | 549.78  | -20.78 |
| P52616 FLJB_SALTY Phase 2 flagellin            | 11 |                   | ELAVQSANSTNSQSDLDSIQAEIT<br>QR                         | 93  | 26 | 6  | 26.24 | b9b12b13y3*y3y6                        | 2805.36 | 69.631  | 2264  | 2 | 1403.18 | 2.61   |
| P52616 FLJB_SALTY Phase 2 flagellin            | 12 |                   | VLAQDNTLTIQVGANDGETIDIDL<br>K                          | 136 | 25 | 4  | 12.32 | b14y9y11°y11                           | 2656.41 | 114.711 | 2135  | 2 | 1328.71 | 15.07  |
| P52616 FLJB_SALTY Phase 2 flagellin            | 13 |                   | QINSQTLGLDSLNVQK                                       | 161 | 16 | 4  | 17.02 | b4°b4b11y4                             | 1757.93 | 45.921  | 1627  | 3 | 586.65  | -7.15  |
| P52616 FLJB_SALTY Phase 2 flagellin            | 14 |                   | NALIAGGVDATDANGAELVKMSY<br>TDK                         | 299 | 26 | 4  | 12.06 | b10b16y4°y4                            | 2624.28 | 75.621  | 82525 | 4 | 656.83  | -3.07  |
| P52616 FLJB_SALTY Phase 2 flagellin            | 15 |                   | FDADNNKYFVTIGGFTGADAAK                                 | 227 | 22 | 4  | 24.05 | b12y6y7y12                             | 2322.10 | 78.278  | 10905 | 4 | 581.28  | -2.52  |
| P52616 FLJB_SALTY Phase 2 flagellin            | 16 |                   | TEVVITIDGKTYNASK                                       | 381 | 15 | 7  | 52    | b3b5b10b12y6y11*y11                    | 1625.83 | 69.966  | 9444  | 2 | 813.42  | -3.98  |
| P52616 FLJB_SALTY Phase 2 flagellin            | 17 |                   | QINSQTLGLDSLNVQKAYDVK                                  | 161 | 21 | 5  | 23.42 | b3*b3b4*b4b10                          | 2334.22 | 89.228  | 8067  | 3 | 778.74  | -5.75  |
| P52616 FLJB_SALTY Phase 2 flagellin            | 18 |                   | LNEIDRVSGQTQFNGVK                                      | 119 | 17 | 4  | 23.17 | b12y7*y7y8                             | 1905.01 | 50.396  | 3876  | 2 | 953.01  | 13.33  |
| P52616 FLJB_SALTY Phase 2 flagellin            | 19 |                   | AATGGTNGTASVTGGAVKFDAD<br>NNK                          | 209 | 25 | 5  | 22.94 | b4b16b17°b17y24                        | 2324.13 | 136.397 | 2812  | 2 | 1162.57 | 7.88   |
| P52616 FLJB_SALTY Phase 2 flagellin            | 20 |                   | AKTTSYTAADGTTK                                         | 355 | 14 | 4  | 19.13 | b4°b4y5y11                             | 1415.72 | 38.035  | 1860  | 3 | 472.58  | 11.12  |
| P52616 FLJB_SALTY Phase 2 flagellin            | 21 | Phosphoryl STY(6) | QINSQTLGLDSLNVQK                                       | 161 | 16 | 4  | 17.02 | b4b13°b13y12                           | 1837.91 | 78.673  | 4620  | 2 | 919.46  | 7.11   |
| P52616 FLJB_SALTY Phase 2 flagellin            | 22 | Phosphoryl STY()  | VRELAVQSANSTNSQSDLSIQAE<br>ITQR                        | 91  | 28 | 4  | 17.19 | b3b12b14y26                            | 3140.49 | 82.250  | 3281  | 3 | 1047.50 | 3.42   |
| P61179 RL22_SALTY 50S ribosomal<br>protein L22 | 1  |                   | IFVDEGPSMK                                             | 73  | 10 | 7  | 60.81 | b2b4y5y6y8y9y10                        | 1122.55 | 50.612  | 62762 | 2 | 561.78  | -2.17  |
| P61179 RL22_SALTY 50S ribosomal<br>protein L22 | 2  |                   | IFVDEGPSMKR                                            | 73  | 11 | 4  | 36.49 | b6y5y8y9                               | 1278.64 | 45.034  | 40265 | 3 | 426.89  | -7.83  |
| P61179 RL22_SALTY 50S ribosomal<br>protein L22 | 3  |                   | LVADLIR                                                | 18  | 7  | 5  | 53.42 | y3y4y5y6y7                             | 799.49  | 57.058  | 37917 | 2 | 400.25  | -13.51 |
| P61179 RL22_SALTY 50S ribosomal<br>protein L22 | 4  |                   | AAVLVK                                                 | 42  | 6  | 1  | 13.56 | b3                                     | 600.41  | 41.063  | 14816 | 1 | 600.41  | 3.96   |
| P61179 RL22_SALTY 50S ribosomal<br>protein L22 | 5  |                   | VLESAIANAEHNDGADIDDLK                                  | 49  | 21 | 5  | 22.22 | b5°b5y5°y5y6                           | 2210.05 | 60.839  | 3974  | 3 | 737.35  | -4.97  |
| P61179 RL22_SALTY 50S ribosomal<br>protein L22 | 6  |                   | VLESAIANAEHNDGADIDDLKVT<br>K                           | 49  | 24 | 3  | 21.91 | b10y11y12                              | 2538.24 | 61.042  | 41857 | 4 | 635.31  | -12.41 |
| P61179 RL22_SALTY 50S ribosomal<br>protein L22 | 7  |                   | KVLESAIANAEHNDGADIDDLK                                 | 48  | 22 | 7  | 20.69 | b13*b13y4°y4y7°y7y9                    | 2338.18 | 112.814 | 9992  | 2 | 1169.59 | 10.86  |
| P0A1H3 EFG_SALTY Elongation factor G           | 1  |                   | VYSGVVNSGDTVLSNVK                                      | 337 | 17 | 13 | 90.3  | b2b4b5°b5y4y5y8y10y11*<br>y11y12y15y17 | 1737.91 | 61.682  | 75131 | 2 | 869.46  | 3.79   |
| P0A1H3 EFG_SALTY Elongation factor G           | 2  |                   | IATDPFVGNLTFFR                                         | 323 | 14 | 11 | 78.42 | b2b4y1y3y4y7*y7y8y10y1<br>2y14         | 1597.84 | 92.759  | 65438 | 2 | 799.42  | 3.06   |
| P0A1H3 EFG_SALTY Elongation factor G           | 3  |                   | SGPLAGYPVVDLGVR                                        | 562 | 15 | 10 | 47.23 | b5°b5b7°b7y2y4y8y10y11y<br>15          | 1499.82 | 75.935  | 59696 | 2 | 750.41  | -0.33  |
| P0A1H3 EFG_SALTY Elongation factor G           | 4  |                   | IGEVHDGAATMDWMEQEQR                                    | 39  | 20 | 4  | 14.26 | b7b12y6y20                             | 2331.99 | 62.039  | 49280 | 3 | 778.00  | -2.62  |
| P0A1H3 EFG_SALTY Elongation factor G           | 5  |                   | GQYGHVVIDMYPLEPGSNPK                                   | 512 | 20 | 7  | 27.75 | b2b4b7b11y6*y6y9                       | 2201.07 | 70.032  | 33274 | 3 | 734.36  | -1.44  |
| P0A1H3 EFG_SALTY Elongation factor G           | 6  |                   | LGANPVPLQLAIGAEEGFTGVVDL<br>VK                         | 161 | 26 | 5  | 15.65 | b4b6y1y3y5                             | 2607.42 | 119.525 | 21685 | 3 | 869.81  | -7.58  |
| P0A1H3 EFG_SALTY Elongation factor G           | 7  |                   | AINWNADQGVTFEYEDIPADMQ<br>DLANEWHQNLIESAAEASEELME<br>K | 189 | 47 | 12 | 42.41 | b5b7b11b14y2°y2y3y8y9°y<br>9y10y29     | 5380.36 | 125.750 | 8412  | 4 | 1345.85 | -4.36  |
| P0A1H3 EFG_SALTY Elongation factor G           | 8  |                   | VEVETPEENTGDVIGDLSR                                    | 618 | 19 | 4  | 21.77 | b1y5y9y14                              | 2058.97 | 79.527  | 6116  | 4 | 515.50  | -8.30  |
| P0A1H3 EFG_SALTY Elongation factor G           | 9  |                   | YLGGEELTEEEIK                                          | 236 | 13 | 3  | 20.48 | b10b12y11                              | 1509.75 | 57.441  | 3075  | 2 | 755.38  | 12.13  |

|                                      |    |                                             |                                      |     |    |    |       |                                                |         |         |       |   |         |        |
|--------------------------------------|----|---------------------------------------------|--------------------------------------|-----|----|----|-------|------------------------------------------------|---------|---------|-------|---|---------|--------|
| P0A1H3 EFG_SALTY Elongation factor G | 10 |                                             | YDDAPNNVAQAVIEAR                     | 686 | 16 | 4  | 27.46 | b3y4y8y12                                      | 1745.85 | 64.517  | 20136 | 2 | 873.43  | 4.20   |
| P0A1H3 EFG_SALTY Elongation factor G | 11 |                                             | ILFYTGVNHK                           | 29  | 10 | 3  | 36.73 | y7y8y9                                         | 1191.63 | 55.075  | 19174 | 3 | 397.88  | -21.61 |
| P0A1H3 EFG_SALTY Elongation factor G | 12 |                                             | VVGQIK                               | 153 | 6  | 1  | 13.56 | b4                                             | 643.41  | 44.662  | 14638 | 1 | 643.41  | 0.38   |
| P0A1H3 EFG_SALTY Elongation factor G | 13 |                                             | QYEPHR                               | 77  | 6  | 1  | 13.56 | y4                                             | 829.38  | 100.935 | 9362  | 1 | 829.38  | -14.50 |
| P0A1H3 EFG_SALTY Elongation factor G | 14 |                                             | HASDDEPFSALAFK                       | 309 | 14 | 3  | 19.13 | b11b13y9                                       | 1534.75 | 62.982  | 6570  | 2 | 767.88  | 20.84  |
| P0A1H3 EFG_SALTY Elongation factor G | 15 |                                             | GYEFINDIK                            | 532 | 9  | 3  | 30.3  | b6b7y4                                         | 1098.55 | 102.811 | 3106  | 1 | 1098.55 | -1.44  |
| P0A1H3 EFG_SALTY Elongation factor G | 16 |                                             | IHAEVPLSEMFGYATQLR                   | 653 | 18 | 5  | 36.38 | b11°b11b12b13y13                               | 2062.00 | 75.775  | 1710  | 2 | 1031.50 | -22.38 |
| P0A1H3 EFG_SALTY Elongation factor G | 17 |                                             | INIIDTPGHVDFTIEVERSMR                | 83  | 21 | 4  | 20.41 | y5y10y12°y12                                   | 2442.27 | 81.027  | 29540 | 3 | 814.76  | 11.50  |
| P0A1H3 EFG_SALTY Elongation factor G | 18 |                                             | VWTDEESNQTIAGMGELHLDIIV<br>DRMK      | 446 | 28 | 3  | 11.64 | b13y11y13                                      | 3213.61 | 136.638 | 11051 | 2 | 1607.31 | 5.70   |
| P0A1H3 EFG_SALTY Elongation factor G | 19 |                                             | GQESEVTGVKIHAEVPLSEMFGY<br>ATQLR     | 643 | 28 | 3  | 17.66 | b4b9b13                                        | 3076.53 | 123.793 | 7649  | 3 | 1026.18 | -3.25  |
| P0A1H3 EFG_SALTY Elongation factor G | 20 |                                             | GYEFINDIKGGVIPGEYIPAVDK              | 532 | 23 | 5  | 29.24 | b5b10b11b13y9                                  | 2494.25 | 82.962  | 7507  | 3 | 832.09  | -13.90 |
| P0A1H3 EFG_SALTY Elongation factor G | 21 |                                             | SGPLAGYPVVDLGVRLHFGSYHD<br>VDSSELAFK | 562 | 32 | 6  | 24.69 | b6b7b9b11°b11y15                               | 3432.68 | 104.123 | 5115  | 3 | 1144.90 | -11.95 |
| P0A1H3 EFG_SALTY Elongation factor G | 22 | Carbamidomethyl+C(10)                       | VLDGAVMVVYCAVGGVQPQSETV<br>WRQANK    | 104 | 28 | 6  | 40.09 | b5b6b7b10b14y10                                | 3062.54 | 132.711 | 3326  | 3 | 1021.52 | 6.94   |
| P0A1H3 EFG_SALTY Elongation factor G | 23 | Oxidation+M(10)                             | GQYGHVVIDMYPLEPGSNPK                 | 512 | 20 | 4  | 22.43 | b8y10y13y18                                    | 2217.04 | 72.888  | 5786  | 3 | 739.68  | -11.12 |
| P0A1H3 EFG_SALTY Elongation factor G | 24 | Carbamidomethyl+C(10)<br>;Oxidation+M(7)    | VLDGAVMVVYCAVGGVQPQSETV<br>WR        | 104 | 24 | 4  | 23.27 | b5y6y7y11                                      | 2637.27 | 94.236  | 1802  | 2 | 1319.14 | -2.50  |
| P63411 ACKA_SALTY Acetate kinase     | 1  | Carbamidomethyl+C(19)                       | FAIDAVNGDEYLSGLAECFHLPE<br>AR        | 17  | 26 | 9  | 29.88 | b2b3b11y2y4y7y9y19y26                          | 2907.40 | 104.193 | 40024 | 3 | 969.80  | 0.34   |
| P63411 ACKA_SALTY Acetate kinase     | 2  |                                             | EGTRPAVVIPTNEELVIAQDASR              | 374 | 23 | 8  | 69.15 | b8b9b14b15y4y6y7y8                             | 2465.29 | 68.454  | 37695 | 3 | 822.44  | -3.27  |
| P63411 ACKA_SALTY Acetate kinase     | 3  | Carbamidomethyl+C(14)                       | ESGLLGLTEVTSDCR                      | 272 | 15 | 7  | 29.22 | b12y2y8y9°y9y11y15                             | 1636.79 | 71.276  | 23365 | 2 | 818.90  | 5.52   |
| P63411 ACKA_SALTY Acetate kinase     | 4  |                                             | LDAVVFTGGIGENAAMVR                   | 324 | 18 | 15 | 85.04 | b3b4b8b15°b15*b15y4y6*<br>y6y7y10°y10y11y13y18 | 1819.92 | 93.087  | 20726 | 2 | 910.46  | -12.01 |
| P63411 ACKA_SALTY Acetate kinase     | 5  | Carbamidomethyl+C(1)                        | CVDTSMGLTPLEGLVMGTR                  | 224 | 19 | 7  | 33.09 | b2b13y1y4y7y8y10                               | 2036.99 | 94.172  | 18592 | 2 | 1019.00 | 6.59   |
| P63411 ACKA_SALTY Acetate kinase     | 6  |                                             | YIGSYTALMDGR                         | 312 | 12 | 4  | 32.32 | b1y3y8y10                                      | 1346.64 | 64.310  | 7902  | 2 | 673.83  | 2.81   |
| P63411 ACKA_SALTY Acetate kinase     | 7  |                                             | NVAVFDATAFHQTMPEESYLYALP<br>YSLYK    | 144 | 28 | 4  | 11.64 | b6b10*b10y5                                    | 3297.57 | 109.395 | 2945  | 3 | 1099.86 | -4.89  |
| P63411 ACKA_SALTY Acetate kinase     | 8  |                                             | SGDIDPAIIFHLHDTLGMSVDQINK            | 243 | 25 | 3  | 18.55 | b6b8b12                                        | 2736.38 | 89.357  | 2398  | 4 | 684.85  | 6.07   |
| P63411 ACKA_SALTY Acetate kinase     | 9  |                                             | SGFINKEGTRPAVVIPTNEELVIAQ<br>DASR    | 368 | 29 | 6  | 14.39 | b3°b3b10*b10y5y12                              | 3111.64 | 102.227 | 5551  | 3 | 1037.89 | -0.16  |
| P63411 ACKA_SALTY Acetate kinase     | 10 |                                             | RYGAHGTSHFYVTQEAAK                   | 177 | 18 | 3  | 15.45 | b11y10y16                                      | 2022.99 | 103.569 | 2969  | 2 | 1012.00 | 6.40   |
| P63411 ACKA_SALTY Acetate kinase     | 11 | Carbamidomethyl+C(18)<br>;Phosphoryl.STY(6) | MLTKESGLLGLTEVTSDCR                  | 268 | 19 | 3  | 14.82 | b5b8y13                                        | 2190.00 | 120.761 | 4637  | 3 | 730.67  | -3.01  |
| P63411 ACKA_SALTY Acetate kinase     | 12 | Carbamidomethyl+C(1)                        | CVDTSMLTPLEGLVMGT                    | 224 | 18 | 0  | 5.75  |                                                | 1880.91 | 94.174  | 3155  | 3 | 627.64  | 14.73  |

|                                                                               |   |                       |                                                   |     |    |    |       |                                          |         |         |       |   |         |        |
|-------------------------------------------------------------------------------|---|-----------------------|---------------------------------------------------|-----|----|----|-------|------------------------------------------|---------|---------|-------|---|---------|--------|
| P0A2C5 RBSB_SALTY D-ribose-binding periplasmic protein                        | 1 |                       | ILLINPTDSDAVGNAVK                                 | 84  | 17 | 14 | 82.01 | b2b3b4b5b12y2y11y12°y12*y12y13*y13y14y17 | 1739.96 | 70.178  | 58845 | 2 | 870.48  | 3.93   |
| P0A2C5 RBSB_SALTY D-ribose-binding periplasmic protein                        | 2 |                       | LAATIAQLPDQIGAK                                   | 253 | 15 | 9  | 62.81 | b3b8y3y4y7y9*y9y11y15                    | 1509.86 | 65.669  | 55714 | 2 | 755.43  | -5.58  |
| P0A2C5 RBSB_SALTY D-ribose-binding periplasmic protein                        | 3 |                       | VIELQGIAGTSAAR                                    | 150 | 14 | 5  | 27.7  | b1b2y7y10y12                             | 1385.77 | 58.472  | 31125 | 2 | 693.39  | -1.67  |
| P0A2C5 RBSB_SALTY D-ribose-binding periplasmic protein                        | 4 |                       | ADVMVVGFDGTPDGEK                                  | 231 | 16 | 4  | 24.05 | b8b12y5y11                               | 1636.77 | 63.168  | 12221 | 2 | 818.89  | 11.04  |
| P0A2C5 RBSB_SALTY D-ribose-binding periplasmic protein                        | 5 |                       | DGAQK                                             | 45  | 5  | 1  | 13.15 | y4                                       | 518.26  | 34.934  | 22961 | 1 | 518.26  | 6.60   |
| P0A2C5 RBSB_SALTY D-ribose-binding periplasmic protein                        | 6 |                       | LVIK                                              | 291 | 4  | 1  | 12.74 | y3                                       | 472.35  | 56.490  | 21281 | 1 | 472.35  | -6.01  |
| P0A2C5 RBSB_SALTY D-ribose-binding periplasmic protein                        | 7 |                       | GDVVSHIASDNVLGGK                                  | 119 | 16 | 4  | 17.02 | b15y9y14°y14                             | 1567.84 | 68.101  | 6046  | 2 | 784.42  | 18.22  |
| P0A2C5 RBSB_SALTY D-ribose-binding periplasmic protein                        | 8 |                       | FNVLASQPADFDRTK                                   | 178 | 15 | 3  | 34.52 | y5y6y7                                   | 1708.88 | 89.325  | 12048 | 2 | 854.94  | 5.86   |
| P0A2C5 RBSB_SALTY D-ribose-binding periplasmic protein                        | 9 |                       | EADKLGYNLVVLDSQNNPAK                              | 50  | 20 | 7  | 38.94 | b5°b5b6b7°b7b9y11                        | 2188.10 | 76.611  | 3044  | 2 | 1094.55 | -13.17 |
| Q7CPP7 RL21_SALTY 50S ribosomal protein L21                                   | 1 |                       | MYAVFQSGGK                                        | 0   | 10 | 7  | 60.81 | b3y1y4y5y7y8y10                          | 1087.52 | 52.023  | 67343 | 2 | 544.27  | -1.12  |
| Q7CPP7 RL21_SALTY 50S ribosomal protein L21                                   | 2 |                       | IGVPFVDGGVIK                                      | 48  | 12 | 4  | 22.11 | b3y2y6y9                                 | 1200.69 | 76.311  | 36661 | 2 | 600.85  | -8.03  |
| Q7CPP7 RL21_SALTY 50S ribosomal protein L21                                   | 3 |                       | ITGISA                                            | 97  | 6  | 1  | 13.56 | b5                                       | 561.33  | 27.644  | 8435  | 1 | 561.33  | 4.35   |
| Q7CPP7 RL21_SALTY 50S ribosomal protein L21                                   | 4 |                       | VSEGQTVR                                          | 13  | 8  | 3  | 40.68 | y5y6y7                                   | 875.45  | 15.825  | 3006  | 2 | 438.23  | -8.58  |
| Q7CPP7 RL21_SALTY 50S ribosomal protein L21                                   | 5 |                       | LDIATGETIEFAEVLMIANGEEVK                          | 24  | 24 | 11 | 41.05 | b3b11°b11y6°y6y7°y7y8°y8*y8y12           | 2592.26 | 136.284 | 2397  | 3 | 864.76  | -21.57 |
| Q7CPP7 RL21_SALTY 50S ribosomal protein L21                                   | 6 |                       | QQGHRQWFTDVK                                      | 85  | 12 | 3  | 26.09 | b6y6y7                                   | 1529.75 | 70.115  | 20674 | 2 | 765.38  | -8.62  |
| Q7CPP7 RL21_SALTY 50S ribosomal protein L21                                   | 7 |                       | YAVFQSGGKQHR                                      | 1   | 12 | 3  | 22.11 | b6y3y9                                   | 1377.70 | 45.770  | 12307 | 3 | 459.90  | -2.84  |
| Q7CPP7 RL21_SALTY 50S ribosomal protein L21                                   | 8 | Oxidation+M(16)       | LDIATGETIEFAEVLMIANGEEVK                          | 24  | 24 | 4  | 19.29 | b8y4y6y12                                | 2608.33 | 75.603  | 66203 | 3 | 870.12  | 10.95  |
| P69936 YDFG_SALTY NADP-dependent L-serine/L-allo-threonine dehydrogenase ydfG | 1 |                       | AVLPGMVER                                         | 115 | 9  | 4  | 54.24 | y4y5y6y7                                 | 971.53  | 52.655  | 28752 | 2 | 486.27  | -5.59  |
| P69936 YDFG_SALTY NADP-dependent L-serine/L-allo-threonine dehydrogenase ydfG | 2 |                       | VTDIEPLVGGETFSSVR                                 | 171 | 18 | 9  | 49.65 | b2b5b13b15y9y13y14y17y18                 | 1862.96 | 68.574  | 23009 | 2 | 931.98  | 5.90   |
| P69936 YDFG_SALTY NADP-dependent L-serine/L-allo-threonine dehydrogenase ydfG | 3 |                       | AAIEEMMASLPAQWR                                   | 58  | 15 | 7  | 36.49 | y4y5y8°y8y11*y11y15                      | 1703.83 | 90.248  | 13279 | 2 | 852.42  | 5.37   |
| P69936 YDFG_SALTY NADP-dependent L-serine/L-allo-threonine dehydrogenase ydfG | 4 | Carbamidomethyl+C(14) | IVLVTGATAGFGECIAR                                 | 1   | 17 | 3  | 23.58 | y4y7y14                                  | 1734.88 | 81.020  | 13942 | 2 | 867.94  | -22.16 |
| P69936 YDFG_SALTY NADP-dependent L-serine/L-allo-threonine dehydrogenase ydfG | 5 | Carbamidomethyl+C(15) | MIVLVTGATAGFGECIAR                                | 0   | 18 | 3  | 24.37 | y7y11y12                                 | 1865.98 | 72.464  | 8602  | 2 | 933.49  | 8.11   |
| P69936 YDFG_SALTY NADP-dependent L-serine/L-allo-threonine dehydrogenase ydfG | 6 |                       | GHIINIGSTAGSWPYAGGNVYGATK                         | 126 | 25 | 10 | 41.64 | b6b10b12°b12b14*b14y6y8y9*y9             | 2491.28 | 122.908 | 1952  | 3 | 831.10  | 18.03  |
| P69936 YDFG_SALTY NADP-dependent L-serine/L-allo-threonine dehydrogenase ydfG | 7 |                       | TYENTTALTPEdITEAVWWVATLPAHVNINTVEMMPVTQSFAGLSVHRS | 199 | 49 | 3  | 11.53 | b8b11y33                                 | 5427.61 | 136.409 | 12821 | 4 | 1357.66 | -9.72  |
| P69936 YDFG_SALTY NADP-dependent L-serine/L-allo-threonine dehydrogenase ydfG | 8 |                       | VTDIEPLVGGETFSSVRFK                               | 171 | 20 | 4  | 14.26 | b7°b7b16y9                               | 2138.09 | 71.107  | 4841  | 2 | 1069.55 | -10.05 |

|                                                                                |    |                                             |                                       |     |    |    |        |                                        |         |         |        |   |         |        |
|--------------------------------------------------------------------------------|----|---------------------------------------------|---------------------------------------|-----|----|----|--------|----------------------------------------|---------|---------|--------|---|---------|--------|
| [P69936]YDFG_SALTY NADP-dependent L-serine/L-allo-threonine dehydrogenase ydfG | 9  | Carbamidomethyl+C(14)<br>;Phosphoryl STY(5) | IVLVTGATAGFGECIAR                     | 1   | 17 | 6  | 50.78  | b6y4y5y6y8y11                          | 1814.90 | 63.294  | 4849   | 3 | 605.64  | 12.85  |
| [P69936]YDFG_SALTY NADP-dependent L-serine/L-allo-threonine dehydrogenase ydfG | 10 | Carbamidomethyl+C(15)<br>;Phosphoryl STY(9) | MIVLVTGATAGFGECIARR                   | 0   | 19 | 9  | 56.17  | b9b11_H3PO4<br>b11°b11b12y6y7y8y10°y10 | 2102.04 | 136.294 | 2048   | 2 | 1051.52 | 9.52   |
| [P69936]YDFG_SALTY NADP-dependent L-serine/L-allo-threonine dehydrogenase ydfG | 11 | Carbamidomethyl+C(15)<br>;Oxidation+M(1)    | MIVLVTGATAGFGECIAR                    | 0   | 18 | 3  | 24.37  | y8y9y16                                | 1881.96 | 119.645 | 14898  | 2 | 941.48  | 2.46   |
| [P69936]YDFG_SALTY NADP-dependent L-serine/L-allo-threonine dehydrogenase ydfG | 12 | Oxidation+M()                               | AAIEEMMASLPAQWR                       | 58  | 15 | 4  | 25.58  | b5b12y8y13                             | 1719.84 | 93.147  | 12368  | 2 | 860.42  | 12.63  |
| [P60446]RL3_SALTY 50S ribosomal protein L3                                     | 1  |                                             | VTVQSLDVVR                            | 169 | 10 | 7  | 67.8   | y2y3y5y6y7y8y10                        | 1115.64 | 56.025  | 142372 | 2 | 558.32  | -3.72  |
| [P60446]RL3_SALTY 50S ribosomal protein L3                                     | 2  |                                             | IFTEDGVSIPTVIEVEANR                   | 13  | 20 | 8  | 51.49  | b2y4°y4y5y6y7y13y20                    | 2188.16 | 87.614  | 88404  | 2 | 1094.59 | 6.47   |
| [P60446]RL3_SALTY 50S ribosomal protein L3                                     | 3  |                                             | MAGQMGNER                             | 160 | 9  | 6  | 57.25  | b2y4*y4y5y7y8                          | 993.42  | 19.550  | 25593  | 2 | 497.21  | -2.40  |
| [P60446]RL3_SALTY 50S ribosomal protein L3                                     | 4  |                                             | AVQVTTGAK                             | 46  | 9  | 7  | 61.37  | b8y3y4y5y7*y7y9                        | 874.49  | 21.000  | 11636  | 2 | 437.75  | -14.59 |
| [P60446]RL3_SALTY 50S ribosomal protein L3                                     | 5  | Carbamidomethyl+C(9)                        | GGVPGATGCDLIVKPAVK                    | 190 | 18 | 4  | 32.37  | y4y5y11y15                             | 1738.92 | 53.660  | 40389  | 3 | 580.31  | -15.79 |
| [P60446]RL3_SALTY 50S ribosomal protein L3                                     | 6  |                                             | NLLLVK                                | 184 | 6  | 3  | 39.86  | y3y4y5                                 | 699.48  | 56.473  | 35427  | 1 | 699.48  | 1.13   |
| [P60446]RL3_SALTY 50S ribosomal protein L3                                     | 7  |                                             | VTKPEAGHFAK                           | 59  | 11 | 3  | 31.12  | y3y7y8                                 | 1184.63 | 25.717  | 21750  | 3 | 395.55  | -14.32 |
| [P60446]RL3_SALTY 50S ribosomal protein L3                                     | 8  |                                             | GLWEFR                                | 77  | 6  | 2  | 26.71  | b4y4                                   | 807.40  | 70.069  | 14295  | 2 | 404.21  | -13.98 |
| [P60446]RL3_SALTY 50S ribosomal protein L3                                     | 9  |                                             | LAEGEETVQGSISEVELFADV K               | 83  | 22 | 4  | 13.33  | b11y4°y4y11                            | 2384.18 | 136.402 | 4903   | 2 | 1192.60 | -1.02  |
| [P60446]RL3_SALTY 50S ribosomal protein L3                                     | 10 | Carbamidomethyl+C(9)                        | GGVPGATGCDLIVKPAVKA                   | 190 | 19 | 10 | 108.25 | b3b4b5b6y5y6y7y8y9y13                  | 1809.97 | 55.842  | 102389 | 3 | 604.00  | -8.84  |
| [P60446]RL3_SALTY 50S ribosomal protein L3                                     | 11 |                                             | IFTEDGVSIPTVIEVEANRVTVK               | 13  | 25 | 4  | 12.32  | b7°b7y16y18                            | 2743.49 | 94.528  | 68051  | 3 | 915.17  | -0.62  |
| [P60446]RL3_SALTY 50S ribosomal protein L3                                     | 12 |                                             | TQDATHGNSLSHRVPGSIGQNQT<br>PGK        | 128 | 26 | 4  | 27.33  | y4y10y11y13                            | 2687.32 | 54.202  | 29888  | 4 | 672.59  | -1.91  |
| [P60446]RL3_SALTY 50S ribosomal protein L3                                     | 13 |                                             | WNFRTQDATHGNSLSHR                     | 124 | 17 | 5  | 27.19  | b10°b10b12b13y14                       | 2026.93 | 72.618  | 8175   | 2 | 1013.97 | -12.65 |
| [P60446]RL3_SALTY 50S ribosomal protein L3                                     | 14 | Phosphoryl STY(6)                           | AVQVTTGAKK                            | 46  | 10 | 3  | 28.49  | b3b4y5                                 | 1082.56 | 71.535  | 15774  | 2 | 541.78  | 5.30   |
| [P60446]RL3_SALTY 50S ribosomal protein L3                                     | 15 |                                             | QVTTGAK                               | 48  | 7  | 0  | 1.64   |                                        | 704.39  | 21.031  | 3858   | 1 | 704.39  | -7.71  |
| [P26982]DEGP_SALTY Protease do                                                 | 1  |                                             | AGDVITSLNGKPISSFAALR                  | 332 | 20 | 8  | 33.2   | b3°b3y1y3y7y9y15y20                    | 2017.09 | 74.354  | 45713  | 3 | 673.03  | -10.47 |
| [P26982]DEGP_SALTY Protease do                                                 | 2  |                                             | NLT SQMVEYGQVK                        | 275 | 13 | 9  | 45.23  | b1b12y5y8y9°y9y11*y11y1<br>3           | 1496.75 | 57.497  | 38222  | 2 | 748.88  | 5.30   |
| [P26982]DEGP_SALTY Protease do                                                 | 3  |                                             | VGDYTV AIGNPFLGETVTSGIVS<br>ALGR      | 186 | 28 | 15 | 85.57  | b2b3b4b6°b6b8b9y2y3y4y<br>5y6y9y14y28  | 2750.43 | 116.054 | 34314  | 3 | 917.48  | -2.31  |
| [P26982]DEGP_SALTY Protease do                                                 | 4  |                                             | GAFVSQVMPNSSAAK                       | 313 | 15 | 9  | 43.62  | b3y1y2y7y8y9y11°y11y15                 | 1493.74 | 52.817  | 29525  | 2 | 747.38  | 1.23   |
| [P26982]DEGP_SALTY Protease do                                                 | 5  |                                             | SDIALIQINPK                           | 160 | 12 | 6  | 40.03  | b3b4b5°b5y6y12                         | 1339.76 | 63.572  | 28223  | 2 | 670.38  | -1.28  |
| [P26982]DEGP_SALTY Protease do                                                 | 6  |                                             | FMALGSGVIIDAAK                        | 110 | 14 | 8  | 60.04  | b3b5b7b8°b8b10y1y4                     | 1392.75 | 75.738  | 21713  | 2 | 696.88  | -2.28  |
| [P26982]DEGP_SALTY Protease do                                                 | 7  |                                             | SGLNVENYENFIQTDAAINR                  | 214 | 20 | 7  | 14.26  | b2°b2b6y3y7*y7y20                      | 2268.10 | 76.852  | 11994  | 2 | 1134.56 | 6.14   |
| [P26982]DEGP_SALTY Protease do                                                 | 8  |                                             | AQVGTMPVGSK                           | 352 | 11 | 8  | 68.21  | y3°y3y5y8°y8y9y10*y10                  | 1074.56 | 34.050  | 25655  | 2 | 537.78  | 0.45   |
| [P26982]DEGP_SALTY Protease do                                                 | 9  |                                             | AITVNLELQQSSQSQVDSSTIFSGI<br>EGAEMSNK | 373 | 33 | 6  | 23.66  | b6b7b12°b12y4y7                        | 3498.64 | 106.398 | 6152   | 3 | 1166.88 | -15.42 |

|                                                            |    |                                                     |                                                    |     |    |    |       |                                          |         |         |       |   |         |        |
|------------------------------------------------------------|----|-----------------------------------------------------|----------------------------------------------------|-----|----|----|-------|------------------------------------------|---------|---------|-------|---|---------|--------|
| P26982 DEGP_SALTY Protease do                              | 10 | Carbamidomethyl+C(13)<br>;Carbamidomethyl+C(25<br>) | NFQQFFGGDDSPFCQDGSPFQNSPF<br>CQGGGNGGNGGQQK        | 71  | 39 | 6  | 21.28 | b6*b6b7*b7b12y8                          | 4240.74 | 90.129  | 3606  | 3 | 1414.25 | -3.22  |
| P26982 DEGP_SALTY Protease do                              | 11 |                                                     | GELGIMGTELNSELAK                                   | 289 | 16 | 6  | 17.02 | b6y6°y6*y6y10*y10                        | 1661.83 | 72.573  | 1792  | 2 | 831.42  | -6.32  |
| P26982 DEGP_SALTY Protease do                              | 12 |                                                     | VDAQRGAFVSQVMPNSSAAK                               | 308 | 20 | 3  | 23.68 | b6b7b10                                  | 2063.03 | 48.219  | 3449  | 4 | 516.51  | -3.08  |
| P26982 DEGP_SALTY Protease do                              | 13 | Oxidation+M(6)                                      | NLTSQMVEYGQVK                                      | 275 | 13 | 5  | 20.48 | b3°b3b8y6°y6                             | 1512.74 | 38.423  | 27629 | 3 | 504.92  | 1.37   |
| P26982 DEGP_SALTY Protease do                              | 14 | Oxidation+M(6)                                      | GELGIMGTELNSELAK                                   | 289 | 16 | 3  | 17.02 | b6b15y10                                 | 1677.82 | 87.069  | 1555  | 3 | 559.95  | -7.93  |
| P26982 DEGP_SALTY Protease do                              | 15 |                                                     | GAFVSQVMPNSSAAK                                    | 313 | 15 | 0  | 4.11  |                                          | 1476.73 | 52.759  | 3738  | 2 | 738.87  | 12.56  |
| P0A1S0 IHFA_SALTY Integration host<br>factor subunit alpha | 1  |                                                     | TGEDIPITAR                                         | 66  | 10 | 9  | 54    | b1b3°b3b4°b4y5y7y8y10                    | 1072.56 | 42.334  | 52949 | 2 | 536.78  | -1.37  |
| P0A1S0 IHFA_SALTY Integration host<br>factor subunit alpha | 2  |                                                     | ELVELFFEEIRR                                       | 24  | 12 | 4  | 29.31 | b3b4°b4b6                                | 1579.83 | 93.164  | 3602  | 3 | 527.28  | -10.59 |
| P0A1S0 IHFA_SALTY Integration host<br>factor subunit alpha | 3  |                                                     | VENASPK                                            | 90  | 7  | 5  | 37.26 | b6y4y5°y5*y5                             | 744.38  | 52.043  | 6752  | 1 | 744.38  | -15.66 |
| P0A1S0 IHFA_SALTY Integration host<br>factor subunit alpha | 4  |                                                     | LSGFGNFDLR                                         | 45  | 10 | 4  | 26.73 | b3°b3b5y6                                | 1125.55 | 73.740  | 2566  | 2 | 563.28  | -19.41 |
| P0A1S0 IHFA_SALTY Integration host<br>factor subunit alpha | 5  |                                                     | MALTKAEMSEYLFDK                                    | 0   | 15 | 3  | 26.07 | y8y9y11                                  | 1776.88 | 74.292  | 4089  | 2 | 888.94  | 12.98  |
| P0A1S0 IHFA_SALTY Integration host<br>factor subunit alpha | 6  |                                                     | ALTKAEMSEYLFDK                                     | 1   | 14 | 4  | 19.13 | b8°b8y6y8                                | 1645.80 | 58.180  | 3737  | 2 | 823.41  | -6.30  |
| P0A1S0 IHFA_SALTY Integration host<br>factor subunit alpha | 7  |                                                     | ALENGEQVKLSGFGNFDLR                                | 36  | 19 | 3  | 22.6  | b8y7y8                                   | 2094.08 | 68.155  | 2179  | 3 | 698.70  | 10.38  |
| P0A1S0 IHFA_SALTY Integration host<br>factor subunit alpha | 8  |                                                     | FFEEIRR                                            | 29  | 7  | 0  | 2.88  |                                          | 996.52  | 93.143  | 2045  | 2 | 498.76  | -6.25  |
| P0A1S0 IHFA_SALTY Integration host<br>factor subunit alpha | 9  |                                                     | ELVELFFEEIRR                                       | 24  | 12 | 0  | 2.88  |                                          | 1561.81 | 93.176  | 2084  | 3 | 521.28  | -11.41 |
| O33921 AGP_SALTY Glucose-1-<br>phohatase                   | 1  |                                                     | TPIGGQLVFQR                                        | 335 | 11 | 4  | 31.12 | y3y8y9y11                                | 1215.67 | 61.109  | 65716 | 2 | 608.34  | -8.13  |
| O33921 AGP_SALTY Glucose-1-<br>phohatase                   | 2  |                                                     | MGTMDFTFNPVITDDSAAFR                               | 141 | 20 | 13 | 58.22 | b3b12b13°b13°b13y1y2y3<br>y6y11y12y15y20 | 2186.01 | 77.731  | 42239 | 2 | 1093.51 | 7.37   |
| O33921 AGP_SALTY Glucose-1-<br>phohatase                   | 3  | Carbamidomethyl+C(14)                               | EWLVAQGLIPSGECPADPTVYAY<br>ANSLQR                  | 87  | 29 | 12 | 57.85 | b4b14°b14y5y6°y6y7*y7y<br>10y13y15y20    | 3205.58 | 93.232  | 26756 | 3 | 1069.20 | 5.48   |
| O33921 AGP_SALTY Glucose-1-<br>phohatase                   | 4  |                                                     | DTFSANYQQEPGVQGPLK                                 | 208 | 18 | 6  | 21.55 | b10b13°b13y8y12y18                       | 1978.97 | 55.954  | 17133 | 2 | 989.99  | 9.50   |
| O33921 AGP_SALTY Glucose-1-<br>phohatase                   | 5  |                                                     | VGNSLVDAFTLQYYEGFPMQVA<br>WGGIHTDR                 | 226 | 31 | 6  | 39.78 | y3y4y6°y6y13y14                          | 3486.66 | 104.154 | 15092 | 3 | 1162.89 | 3.92   |
| O33921 AGP_SALTY Glucose-1-<br>phohatase                   | 6  | Carbamidomethyl+C(14)                               | LLEQITHYQDSPSCK                                    | 182 | 15 | 3  | 17.99 | b5b7y11                                  | 1818.89 | 51.386  | 5061  | 2 | 909.95  | 14.03  |
| O33921 AGP_SALTY Glucose-1-<br>phohatase                   | 7  | Carbamidomethyl+C(14)                               | LLEQITHYQDSPSCKEK                                  | 182 | 17 | 3  | 16.18 | b8b10y10                                 | 2076.02 | 48.015  | 3380  | 3 | 692.68  | 4.35   |
| O33921 AGP_SALTY Glucose-1-<br>phohatase                   | 8  |                                                     | APLANNGSVLAQSTPNAWPAWD<br>VPGGQLTTK                | 43  | 31 | 9  | 27.55 | b10b11b14°b14b18y8°y8y<br>13*y13         | 3161.61 | 82.764  | 16802 | 3 | 1054.54 | 1.39   |
| O33921 AGP_SALTY Glucose-1-<br>phohatase                   | 9  |                                                     | SQLHLDESYK                                         | 172 | 10 | 5  | 28.49 | b3°b3b4°b4y3                             | 1219.58 | 20.552  | 7933  | 3 | 407.20  | -11.21 |
| O33921 AGP_SALTY Glucose-1-<br>phohatase                   | 10 | Carbamidomethyl+C(16)                               | TVATAQFFFITGAFPGCDIPVHHQE<br>K                     | 116 | 25 | 3  | 12.32 | b7b13y8                                  | 2771.37 | 84.753  | 5045  | 4 | 693.60  | 3.52   |
| O33921 AGP_SALTY Glucose-1-<br>phohatase                   | 11 |                                                     | GGVLEVYMGHYTR                                      | 74  | 13 | 3  | 20.48 | b5b10y8                                  | 1481.73 | 48.930  | 2918  | 2 | 741.37  | 9.31   |
| O33921 AGP_SALTY Glucose-1-<br>phohatase                   | 12 |                                                     | NGYQDSLFTSPTVAR                                    | 266 | 15 | 3  | 17.99 | b13y6y10                                 | 1655.77 | 68.033  | 2066  | 3 | 552.60  | -18.73 |
| O33921 AGP_SALTY Glucose-1-<br>phohatase                   | 13 |                                                     | IEYVYQSARQLR                                       | 358 | 12 | 6  | 47.69 | b5b6°b6b8°b8b9                           | 1525.79 | 44.603  | 27447 | 3 | 509.27  | -12.08 |
| O33921 AGP_SALTY Glucose-1-<br>phohatase                   | 14 |                                                     | ARSQLHLDESYK                                       | 170 | 12 | 5  | 22.11 | b11°b11°b11y4y7                          | 1446.71 | 75.619  | 24706 | 2 | 723.86  | -13.16 |
| O33921 AGP_SALTY Glucose-1-<br>phohatase                   | 15 |                                                     | VGNSLVDAFTLQYYEGFPMQVA<br>WGGIHTDRQWK              | 226 | 34 | 5  | 10.96 | b7b10°b10y7*y7                           | 3928.84 | 83.509  | 23253 | 3 | 1310.28 | -9.69  |
| O33921 AGP_SALTY Glucose-1-<br>phohatase                   | 16 | Carbamidomethyl+C(16)                               | TVATAQFFFITGAFPGCDIPVHHQE<br>KMGTMDFTFNPVITDDSAAFR | 116 | 45 | 4  | 21.53 | b15y5y6y11                               | 4938.40 | 121.321 | 6307  | 4 | 1235.35 | 13.15  |



|                                                             |    |                       |                             |     |    |    |       |                                      |         |         |       |   |         |        |
|-------------------------------------------------------------|----|-----------------------|-----------------------------|-----|----|----|-------|--------------------------------------|---------|---------|-------|---|---------|--------|
| O33921 AGP_SALTY Glucose-1-phohatase                        | 17 |                       | NYQQEPGVQGPLK               | 213 | 13 | 0  | 5.34  |                                      | 1457.75 | 55.964  | 1981  | 2 | 729.38  | 10.97  |
| P02936 OMPA_SALTY Outer membrane protein A                  | 1  | Carbamidomethyl+C(13) | GMGESNPVTGNTCDNVKPR         | 302 | 19 | 14 | 85.47 | b2b3b4y1y2y5y6y10y11°y1ly13y15y17y19 | 2032.90 | 37.209  | 62019 | 3 | 678.31  | -7.75  |
| P02936 OMPA_SALTY Outer membrane protein A                  | 2  |                       | GVKDVVTQPQA                 | 339 | 11 | 6  | 24.13 | b8y1y3*y3y9y11                       | 1141.62 | 36.982  | 35368 | 2 | 571.31  | -3.31  |
| P02936 OMPA_SALTY Outer membrane protein A                  | 3  |                       | IGSDAYNQGLSEKR              | 267 | 14 | 5  | 32.79 | b2b3b4y3y11                          | 1537.75 | 33.965  | 23373 | 3 | 513.25  | -9.92  |
| P02936 OMPA_SALTY Outer membrane protein A                  | 4  |                       | IGSDAYNQGLSEK               | 267 | 13 | 6  | 32.08 | b2b4°b4b5b9y8                        | 1381.65 | 37.351  | 8963  | 2 | 691.33  | -9.01  |
| P02936 OMPA_SALTY Outer membrane protein A                  | 5  |                       | LGYPITDDLDVYTR              | 103 | 14 | 5  | 39.53 | b11b13y4y9y11                        | 1640.82 | 75.429  | 8445  | 2 | 820.91  | 1.19   |
| P02936 OMPA_SALTY Outer membrane protein A                  | 6  |                       | FGQQEAAPVVAPAPAPAEVQTK      | 194 | 23 | 10 | 58.91 | b3b13y5y8y9°y9*y9y10y12y13           | 2303.20 | 53.247  | 6840  | 3 | 768.41  | -0.32  |
| P02936 OMPA_SALTY Outer membrane protein A                  | 7  |                       | DGSVVVLGFTDR                | 255 | 12 | 4  | 29.31 | b5°b5b6b11                           | 1264.65 | 97.370  | 25213 | 2 | 632.83  | 1.06   |
| P02936 OMPA_SALTY Outer membrane protein A                  | 8  |                       | STLKPEGQQALDQLYSQLSNLDPK    | 231 | 24 | 4  | 12.62 | b6b8y9*y9                            | 2673.32 | 74.384  | 8502  | 3 | 891.78  | -19.09 |
| P02936 OMPA_SALTY Outer membrane protein A                  | 9  |                       | DVVTQPQA                    | 342 | 8  | 4  | 35.91 | b7y3y7°y7                            | 857.44  | 84.752  | 2184  | 1 | 857.44  | 3.35   |
| P02936 OMPA_SALTY Outer membrane protein A                  | 10 |                       | SDVLFNFNK                   | 222 | 9  | 13 | 93.69 | b3b5°b5b6°b6*b6b8°b8y3*y3y4*y4y5     | 1083.52 | 136.298 | 2047  | 1 | 1083.52 | -20.50 |
| P02936 OMPA_SALTY Outer membrane protein A                  | 11 |                       | HFTLKSDVLFNFNK              | 217 | 14 | 3  | 19.13 | b4b7y8                               | 1709.91 | 58.421  | 11009 | 3 | 570.64  | 5.43   |
| P02936 OMPA_SALTY Outer membrane protein A                  | 12 |                       | GDNINGAYKAQGVQLTAK          | 85  | 18 | 3  | 22.86 | b12b13y14                            | 1847.96 | 77.591  | 4253  | 3 | 616.66  | -1.06  |
| P02936 OMPA_SALTY Outer membrane protein A                  | 13 | Carbamidomethyl+C(6)  | AALIDCLAPDRR                | 321 | 12 | 5  | 43.85 | b3b10y4y5y7                          | 1370.71 | 56.094  | 3345  | 3 | 457.58  | -6.77  |
| P02936 OMPA_SALTY Outer membrane protein A                  | 14 |                       | LGYPITDDLVDYTRLGGMVWR       | 103 | 21 | 3  | 13.77 | b12y5y7                              | 2440.26 | 134.290 | 2099  | 2 | 1220.63 | 11.31  |
| P02936 OMPA_SALTY Outer membrane protein A                  | 15 | Phosphoryl STY(7)     | GVKDVVTQPQA                 | 339 | 11 | 3  | 35.89 | b4b6b8                               | 1221.59 | 45.613  | 7055  | 2 | 611.30  | 6.30   |
| P02936 OMPA_SALTY Outer membrane protein A                  | 16 |                       | DAYNQGLSEKR                 | 270 | 11 | 0  | 3.7   |                                      | 1280.64 | 33.871  | 10235 | 2 | 640.82  | 14.39  |
| P0A7Z7 RPOA_SALTY DNA-directed RNA polymerase subunit alpha | 1  | Carbamidomethyl+C(6)  | LLVDACYSPVER                | 170 | 12 | 9  | 75.38 | b5b7y5y6°y6y8y9y10y12                | 1421.71 | 58.851  | 62488 | 2 | 711.36  | 3.09   |
| P0A7Z7 RPOA_SALTY DNA-directed RNA polymerase subunit alpha | 2  |                       | LVDIEQVSSTHAK               | 12  | 13 | 4  | 32.08 | b7y3y4y7                             | 1426.74 | 45.039  | 62144 | 3 | 476.25  | -11.46 |
| P0A7Z7 RPOA_SALTY DNA-directed RNA polymerase subunit alpha | 3  |                       | VTLEPLER                    | 25  | 8  | 8  | 66.98 | y1y3y4°y4y5y6y7y8                    | 956.53  | 51.723  | 50718 | 2 | 478.77  | -10.08 |
| P0A7Z7 RPOA_SALTY DNA-directed RNA polymerase subunit alpha | 4  |                       | IAYNVEAAR                   | 182 | 9  | 6  | 67.39 | y1y3y4y6y7y8                         | 1006.53 | 38.428  | 27764 | 2 | 503.77  | -3.52  |
| P0A7Z7 RPOA_SALTY DNA-directed RNA polymerase subunit alpha | 5  | Carbamidomethyl+C(9)  | ILLSSMPGCAVTEVEIDGVLHEYS TK | 45  | 26 | 7  | 27.79 | b9°b9b13b15y6y10y13                  | 2848.47 | 109.453 | 23295 | 3 | 950.16  | 22.03  |
| P0A7Z7 RPOA_SALTY DNA-directed RNA polymerase subunit alpha | 6  |                       | TDLDK                       | 195 | 5  | 1  | 13.15 | b3                                   | 591.30  | 38.035  | 4976  | 1 | 591.30  | -3.61  |
| P0A7Z7 RPOA_SALTY DNA-directed RNA polymerase subunit alpha | 7  |                       | LVIEMETNGTIDPEEAIR          | 200 | 18 | 9  | 51.65 | b9*b9b12*b12b15*b15y9y10y11          | 2030.02 | 104.139 | 4729  | 3 | 677.34  | 4.51   |
| P0A7Z7 RPOA_SALTY DNA-directed RNA polymerase subunit alpha | 8  |                       | GLSLGMR                     | 310 | 7  | 4  | 50.41 | b6y3y4y5                             | 733.39  | 49.971  | 2878  | 1 | 733.39  | -18.06 |

|                                                              |    |                      |                               |     |    |    |        |                                  |         |         |       |   |         |        |
|--------------------------------------------------------------|----|----------------------|-------------------------------|-----|----|----|--------|----------------------------------|---------|---------|-------|---|---------|--------|
| P0A7Z7 RPOA_SALTY DNA-directed RNA polymerase subunit alpha  | 9  |                      | GYVPASTRIHSEEDERPIGR          | 150 | 20 | 3  | 14.26  | b11b13y3                         | 2269.13 | 68.663  | 29368 | 3 | 757.05  | 0.43   |
| P0A7Z7 RPOA_SALTY DNA-directed RNA polymerase subunit alpha  | 10 |                      | TDLDKLVIEMETNGTIDPEEAIR       | 195 | 23 | 4  | 12.95  | b10y7y13*y13                     | 2602.28 | 102.285 | 2020  | 3 | 868.10  | -4.60  |
| P0A7Z7 RPOA_SALTY DNA-directed RNA polymerase subunit alpha  | 11 | Phosphoryl STY(10)   | LVIEMETNGTIDPEEAIRR           | 200 | 19 | 4  | 20.51  | b8b13y8y12                       | 2266.04 | 98.077  | 3660  | 4 | 567.27  | -13.04 |
| P0A7Z7 RPOA_SALTY DNA-directed RNA polymerase subunit alpha  | 12 |                      | DIEQVSSTHAK                   | 14  | 11 | 2  | 7.4    | b10°b10                          | 1214.61 | 45.094  | 12402 | 2 | 607.81  | 8.64   |
| Q8ZQD4 LOLA_SALTY Outer-membrane lipoprotein carrier protein | 1  |                      | DATGNTPFMLIAR                 | 103 | 13 | 4  | 20.48  | b3b9y3y13                        | 1406.72 | 51.757  | 35867 | 2 | 703.86  | 6.86   |
| Q8ZQD4 LOLA_SALTY Outer-membrane lipoprotein carrier protein | 2  |                      | TLWFYNPFEQATATWLK             | 85  | 18 | 13 | 66.1   | b2b5°b5b6b9y1y2y4y10y12y13y14y18 | 2215.12 | 115.741 | 22893 | 2 | 1108.06 | -2.54  |
| Q8ZQD4 LOLA_SALTY Outer-membrane lipoprotein carrier protein | 3  |                      | FTFTPPQGVTTIDDQR              | 187 | 15 | 7  | 51.21  | b1b4b6b7b8y5y9                   | 1721.87 | 61.878  | 16859 | 3 | 574.63  | 11.63  |
| Q8ZQD4 LOLA_SALTY Outer-membrane lipoprotein carrier protein | 4  |                      | DGTIHQFSAVEQDDQR              | 154 | 16 | 4  | 17.02  | b3°b3b12y13                      | 1845.86 | 83.549  | 4393  | 3 | 615.96  | 12.50  |
| Q8ZQD4 LOLA_SALTY Outer-membrane lipoprotein carrier protein | 5  |                      | VTDGSGAAVQEGQGDLWVK           | 44  | 19 | 5  | 31.37  | b7b11y9y13y14                    | 1916.97 | 83.569  | 2545  | 2 | 958.99  | 17.89  |
| Q8ZQD4 LOLA_SALTY Outer-membrane lipoprotein carrier protein | 6  |                      | RPNLFNWHMTQPDESILVSDGK        | 63  | 22 | 4  | 20.69  | b3b7b18y14                       | 2584.24 | 104.967 | 1909  | 3 | 862.08  | -9.83  |
| Q8ZQD4 LOLA_SALTY Outer-membrane lipoprotein carrier protein | 7  | Carbamidomethyl+C(6) | KMAIACALLSSVVASSVWADAAS SLK   | 2   | 26 | 4  | 12.06  | b7b16y12°y12                     | 2636.40 | 86.234  | 15092 | 4 | 659.85  | 6.39   |
| Q8ZQD4 LOLA_SALTY Outer-membrane lipoprotein carrier protein | 8  |                      | SQQNGAVDP SKFTFTPPQGVTTIDD QR | 176 | 26 | 4  | 21.84  | b12b13y3°y3                      | 2833.38 | 101.127 | 1746  | 3 | 945.13  | 1.12   |
| Q8ZQD4 LOLA_SALTY Outer-membrane lipoprotein carrier protein | 9  |                      | SAYQLKSQQNGAVDPSK             | 170 | 17 | 3  | 23.58  | y7y10y13                         | 1820.92 | 87.876  | 1528  | 2 | 910.97  | 5.36   |
| P0A2E1 GLYA_SALTY Serine hydroxymethyltransferase            | 1  |                      | LNSAVFPSAQGGPLMHVIAGK         | 251 | 21 | 9  | 43.32  | b4°b4*b4b16y3y4y5y15y21          | 2094.10 | 77.881  | 65974 | 3 | 698.71  | -6.18  |
| P0A2E1 GLYA_SALTY Serine hydroxymethyltransferase            | 2  |                      | SPFVTSGIR                     | 354 | 9  | 5  | 61.37  | b8y4y5y6y7                       | 963.53  | 48.820  | 54404 | 2 | 482.27  | -0.76  |
| P0A2E1 GLYA_SALTY Serine hydroxymethyltransferase            | 3  | Carbamidomethyl+C(5) | VLDICAR                       | 405 | 7  | 5  | 40.27  | b2y4y5y6y7                       | 846.44  | 44.235  | 46217 | 2 | 423.72  | -9.66  |
| P0A2E1 GLYA_SALTY Serine hydroxymethyltransferase            | 4  |                      | VMQAQGSQTLNK                  | 42  | 12 | 13 | 115.99 | b2b3b5b10y2y3y4y6y7y9y10*y10y12  | 1304.66 | 29.057  | 44742 | 2 | 652.83  | -1.59  |
| P0A2E1 GLYA_SALTY Serine hydroxymethyltransferase            | 5  |                      | EMNIADYDAELWQAMEQEK           | 4   | 19 | 9  | 97.72  | y4y5y6y7y10y11y12y13y19          | 2314.01 | 92.005  | 30013 | 2 | 1157.51 | 5.59   |
| P0A2E1 GLYA_SALTY Serine hydroxymethyltransferase            | 6  | Carbamidomethyl+C(7) | ELAGWMCDVLDNINDEATIER         | 380 | 21 | 10 | 38.35  | b2°b2b11y2°y2y5y11y12y13y21      | 2464.13 | 101.337 | 17658 | 2 | 1232.57 | 7.93   |
| P0A2E1 GLYA_SALTY Serine hydroxymethyltransferase            | 7  |                      | MIIGFSAYSGVVDWAK              | 168 | 17 | 9  | 48.56  | b15y8°y8y11y13°y13y14°y14y16     | 1800.89 | 102.659 | 7601  | 3 | 600.97  | -4.95  |
| P0A2E1 GLYA_SALTY Serine hydroxymethyltransferase            | 8  |                      | LYNIVPYGIDESGK                | 138 | 14 | 5  | 32.79  | b12b13y2y3y13                    | 1567.81 | 69.827  | 4362  | 2 | 784.41  | 3.74   |
| P0A2E1 GLYA_SALTY Serine hydroxymethyltransferase            | 9  | Carbamidomethyl+C(5) | YYGGCEYVDVVEQLAIDR            | 63  | 18 | 4  | 15.45  | b4y4y12°y12                      | 2149.02 | 109.434 | 1841  | 3 | 717.01  | 11.47  |
| P0A2E1 GLYA_SALTY Serine hydroxymethyltransferase            | 10 |                      | EMNIADYDAELWQAMEQEKVR         | 4   | 21 | 3  | 13.77  | b5b19y19                         | 2569.14 | 73.843  | 46428 | 3 | 857.05  | -11.97 |

|                                                   |    |                 |                              |     |    |    |       |                            |         |         |        |   |         |        |
|---------------------------------------------------|----|-----------------|------------------------------|-----|----|----|-------|----------------------------|---------|---------|--------|---|---------|--------|
| P0A2E1 GLYA_SALTY Serine hydroxymethyltransferase | 11 |                 | NSVPNDPKSPFVTSGIR            | 346 | 17 | 3  | 24.83 | y8y9y14                    | 1814.92 | 51.907  | 32631  | 3 | 605.65  | -8.81  |
| P0A2E1 GLYA_SALTY Serine hydroxymethyltransferase | 12 |                 | QEEHIELIASENYTSPRVMAQGS QLTK | 25  | 29 | 3  | 11.47 | b9b12y15                   | 3301.61 | 83.512  | 25541  | 4 | 826.16  | -1.85  |
| P0A2E1 GLYA_SALTY Serine hydroxymethyltransferase | 13 |                 | VMQAQGSQLTNKYAEGYPGK         | 42  | 20 | 8  | 49.35 | b11*b11b15b19y5y6y7*y7     | 2170.06 | 67.102  | 11365  | 4 | 543.27  | 1.24   |
| P0A2E1 GLYA_SALTY Serine hydroxymethyltransferase | 14 |                 | EHKPKMIIGGFSAYSGVVDWAK       | 163 | 22 | 5  | 24.05 | b18y9y10*y10y12            | 2420.26 | 104.590 | 9677   | 4 | 605.82  | 5.55   |
| P0A2E1 GLYA_SALTY Serine hydroxymethyltransferase | 15 |                 | LYNIVPYGIDESGKIDYDEMAK       | 138 | 22 | 8  | 47.54 | b10*b10b12b14y9y10*y10y11  | 2533.21 | 87.245  | 5379   | 3 | 845.08  | -1.45  |
| P0A2E1 GLYA_SALTY Serine hydroxymethyltransferase | 16 |                 | MIIGGFSAYSGVVDWAKMR          | 168 | 19 | 3  | 14.82 | b4b15y8                    | 2088.05 | 103.847 | 4592   | 3 | 696.69  | 4.09   |
| P0A2E1 GLYA_SALTY Serine hydroxymethyltransferase | 17 | Oxidation+M(15) | LNSAVFPSAQGGPLMHVIAGK        | 251 | 21 | 3  | 23.42 | y3y4y18                    | 2110.09 | 84.635  | 42792  | 3 | 704.03  | -11.34 |
| P0A2E1 GLYA_SALTY Serine hydroxymethyltransferase | 18 |                 | IGGFSAYSGVVDWAK              | 170 | 15 | 1  | 7.29  | b10                        | 1556.79 | 102.698 | 7107   | 2 | 778.90  | 6.98   |
| P66932 TIG_SALTY Trigger factor                   | 1  |                 | NVALEEQAWEAVLAK              | 399 | 15 | 7  | 31.6  | b2b3b11y1y2y11y12          | 1583.86 | 79.557  | 109314 | 2 | 792.44  | -0.39  |
| P66932 TIG_SALTY Trigger factor                   | 2  |                 | SQAIEGLVK                    | 287 | 9  | 7  | 30.3  | b2b3*b3y1y3y4y9            | 944.54  | 46.959  | 35003  | 2 | 472.77  | -4.26  |
| P66932 TIG_SALTY Trigger factor                   | 3  |                 | GLIEEMASAYEDPKVIEFYK         | 368 | 22 | 7  | 25.36 | b2b8b18y4y8y12y22          | 2548.18 | 80.975  | 26426  | 3 | 850.07  | -13.51 |
| P66932 TIG_SALTY Trigger factor                   | 4  |                 | VEERELPELTEEFIK              | 239 | 15 | 3  | 17.99 | b10y6y9                    | 1860.95 | 76.866  | 17219  | 2 | 930.98  | -4.00  |
| P66932 TIG_SALTY Trigger factor                   | 5  |                 | INPAGAPNYVPGEYK              | 83  | 15 | 10 | 69.99 | y3y5*y5y7y8*y8y9*y9y13y15  | 1589.81 | 50.355  | 16783  | 2 | 795.41  | 7.76   |
| P66932 TIG_SALTY Trigger factor                   | 6  |                 | ANDIDVPSALIDSEIDVLR          | 296 | 19 | 9  | 38.78 | b3b6b7*b7b10y1y3y13y19     | 2055.07 | 94.061  | 16639  | 2 | 1028.04 | 2.97   |
| P66932 TIG_SALTY Trigger factor                   | 7  |                 | QALELPRELFEEQAK              | 327 | 15 | 3  | 17.99 | b9y3y10                    | 1800.92 | 56.453  | 9766   | 3 | 600.98  | -14.17 |
| P66932 TIG_SALTY Trigger factor                   | 8  |                 | AGEEFTIDVTFPEEYHAENLK        | 206 | 21 | 5  | 37.96 | b7b11b12y12y13             | 2439.10 | 101.248 | 2526   | 3 | 813.71  | -13.31 |
| P66932 TIG_SALTY Trigger factor                   | 9  |                 | YGASVR                       | 57  | 6  | 1  | 13.56 | b4                         | 652.34  | 26.510  | 20668  | 1 | 652.34  | 3.93   |
| P66932 TIG_SALTY Trigger factor                   | 10 |                 | FGVEDGSVAGLR                 | 255 | 12 | 5  | 43.85 | b5b10y7y9y10               | 1206.62 | 40.223  | 16314  | 3 | 402.88  | 7.79   |
| P66932 TIG_SALTY Trigger factor                   | 11 |                 | VTIDFTGSVDGEEFEGGK           | 163 | 18 | 4  | 21.55 | b5b14y4y8                  | 1886.83 | 120.459 | 14636  | 3 | 629.62  | -17.27 |
| P66932 TIG_SALTY Trigger factor                   | 12 |                 | ATDFVLAMGQGR                 | 181 | 12 | 5  | 31.95 | b3*b3b7y3y10               | 1265.60 | 79.560  | 11351  | 3 | 422.54  | -21.51 |
| P66932 TIG_SALTY Trigger factor                   | 13 |                 | ELFEEQAK                     | 334 | 8  | 8  | 66.98 | b3*b3b6y3*y3y6*y6y7        | 993.49  | 136.308 | 2549   | 1 | 993.49  | 1.23   |
| P66932 TIG_SALTY Trigger factor                   | 14 |                 | QDVLGDLMSR                   | 63  | 10 | 3  | 41.5  | y3y5y8                     | 1133.54 | 76.662  | 2493   | 2 | 567.27  | -19.71 |
| P66932 TIG_SALTY Trigger factor                   | 15 | Oxidation+M(1)  | MQVSVETQQLGRR                | 0   | 14 | 3  | 19.13 | b7y9y11                    | 1577.81 | 97.889  | 2027   | 2 | 789.41  | -0.85  |
| P58661 AAT_SALTY Aartate aminotransferase         | 1  |                 | MFENITAAPADPILGLADLFR        | 0   | 21 | 11 | 73.03 | b2b3b5b8b10b11y1y3y4y13y14 | 2275.19 | 120.229 | 12921  | 2 | 1138.10 | 4.51   |
| P58661 AAT_SALTY Aartate aminotransferase         | 2  |                 | TAQTPGGTGALR                 | 96  | 12 | 5  | 26.09 | b5*b5y8y9y12               | 1129.60 | 28.824  | 11598  | 2 | 565.30  | 1.84   |
| P58661 AAT_SALTY Aartate aminotransferase         | 3  |                 | NYLGIDGIPEFAR                | 63  | 13 | 4  | 20.48 | b2b3y5y10                  | 1464.74 | 80.396  | 9310   | 2 | 732.88  | -2.33  |
| P58661 AAT_SALTY Aartate aminotransferase         | 4  |                 | VWVSNPSPWPNHK                | 122 | 12 | 3  | 22.11 | b4y3y8                     | 1450.71 | 53.673  | 6024   | 3 | 484.24  | -11.86 |
| P58661 AAT_SALTY Aartate aminotransferase         | 5  |                 | ANYSNPAPHGASIVATILSNDALR     | 280 | 24 | 3  | 21.91 | b13y4y5                    | 2452.21 | 58.956  | 4783   | 3 | 818.07  | -21.40 |
| P58661 AAT_SALTY Aartate aminotransferase         | 6  |                 | AIWEQELTDMR                  | 304 | 11 | 5  | 36.49 | b10*b10y3y9y10             | 1391.66 | 136.555 | 4625   | 1 | 1391.66 | 0.00   |

|                                                                          |    |                      |                                    |     |    |    |        |                                                 |         |         |        |   |         |        |
|--------------------------------------------------------------------------|----|----------------------|------------------------------------|-----|----|----|--------|-------------------------------------------------|---------|---------|--------|---|---------|--------|
| P58661 AAT_SALTY Aartate aminotransferase                                | 7  |                      | DQVLR                              | 355 | 5  | 1  | 13.15  | b3                                              | 630.35  | 40.809  | 3486   | 1 | 630.35  | -13.85 |
| P58661 AAT_SALTY Aartate aminotransferase                                | 8  |                      | QLFVNTLQEK                         | 322 | 10 | 4  | 26.73  | b6y5*y5y7                                       | 1219.68 | 58.843  | 3139   | 2 | 610.34  | 7.51   |
| P58661 AAT_SALTY Aartate aminotransferase                                | 9  |                      | AFSQMKSAIR                         | 270 | 10 | 3  | 26.73  | b4b6y8                                          | 1138.60 | 79.344  | 10118  | 2 | 569.80  | -5.57  |
| P58661 AAT_SALTY Aartate aminotransferase                                | 10 |                      | GWLPLFD FayQG FARGLEEDAEG LR       | 204 | 25 | 4  | 22.94  | b13y13y14y22                                    | 2857.40 | 136.578 | 7621   | 2 | 1429.20 | 1.62   |
| P0A9Y9 CC_SALTY Cold shock-like protein cC                               | 1  |                      | GFGFITPADGSK                       | 15  | 12 | 20 | 154.64 | b2b3b4b5b6b12y2°y2y3°y3y4y5y6°y6y7°y7y8y9y10y12 | 1196.59 | 63.890  | 494959 | 2 | 598.80  | -4.90  |
| P0A9Y9 CC_SALTY Cold shock-like protein cC                               | 2  |                      | DVVFHFSAIQNGNGFK                   | 27  | 15 | 6  | 44.41  | b3°b3b5b8b12y11                                 | 1665.85 | 85.929  | 18082  | 2 | 833.43  | 4.32   |
| P0A9Y9 CC_SALTY Cold shock-like protein cC                               | 3  |                      | TLAEGQNVEFEIQDGQKGPAAVN VTAI       | 42  | 27 | 7  | 25.47  | b3b11b22°b22b24y3°y3                            | 2799.42 | 75.281  | 80888  | 3 | 933.81  | 2.35   |
| P0A9Y9 CC_SALTY Cold shock-like protein cC                               | 4  |                      | DVVFHFSAIQNGNGFKTLAEGQNV EFEIQDGQK | 27  | 32 | 3  | 11.11  | b8y6y9                                          | 3552.79 | 98.315  | 5759   | 3 | 1184.93 | 13.54  |
| P0A9Y9 CC_SALTY Cold shock-like protein cC                               | 5  |                      | TPADGSK                            | 20  | 7  | 3  | 21.39  | b4b5°b5                                         | 675.33  | 63.996  | 4949   | 1 | 675.33  | 1.72   |
| P0A9Y9 CC_SALTY Cold shock-like protein cC                               | 6  |                      | GFITPADGSK                         | 17  | 10 | 2  | 17.41  | b3b8                                            | 992.50  | 63.850  | 1874   | 1 | 992.50  | -3.01  |
| Q8ZRP4 DAPD_SALTY 2                                                      | 1  |                      | EAVNQVISLLDSGALR                   | 28  | 16 | 4  | 42.64  | y5y6y9y10                                       | 1684.92 | 91.757  | 41463  | 2 | 842.97  | 1.09   |
| Q8ZRP4 DAPD_SALTY 2                                                      | 2  |                      | INDNQVIDGAESR                      | 68  | 13 | 6  | 63.01  | y5y6y7y8y9y13                                   | 1430.69 | 40.589  | 28590  | 2 | 715.85  | 4.01   |
| Q8ZRP4 DAPD_SALTY 2                                                      | 3  |                      | VPAGSVVVSGNLP SKDGK                | 226 | 18 | 5  | 15.45  | b4b6y2y3y18                                     | 1710.92 | 42.996  | 26814  | 3 | 570.98  | -10.56 |
| Q8ZRP4 DAPD_SALTY 2                                                      | 4  |                      | FADYDEAR                           | 89  | 8  | 4  | 32.9   | b2b3y5y6                                        | 986.43  | 33.974  | 25540  | 2 | 493.72  | 7.12   |
| Q8ZRP4 DAPD_SALTY 2                                                      | 5  |                      | IDGQWVTHQWLK                       | 48  | 12 | 7  | 44.68  | b2b3b4b7b10°b10y12                              | 1510.76 | 90.165  | 22323  | 2 | 755.88  | -14.46 |
| Q8ZRP4 DAPD_SALTY 2                                                      | 6  |                      | MQQLQNVIAFERR                      | 0   | 15 | 3  | 26.07  | b3b9b12                                         | 1862.96 | 62.763  | 12818  | 3 | 621.66  | 2.10   |
| Q8ZRP4 DAPD_SALTY 2                                                      | 7  |                      | ETGEVHYGRVPAGSVVVSGNLP S K         | 217 | 24 | 3  | 22.91  | b9b10b12                                        | 2439.25 | 110.156 | 4861   | 3 | 813.75  | -5.50  |
| Q8ZRP4 DAPD_SALTY 2                                                      | 8  | Phosphoryl STY(7)    | IDGQWVTHQWLKK                      | 48  | 13 | 5  | 34.95  | b4b5b6°b6*b6                                    | 1718.83 | 101.020 | 2059   | 3 | 573.62  | -0.14  |
| Q8ZRP4 DAPD_SALTY 2                                                      | 9  |                      | IDGQWVTHQ                          | 48  | 9  | 0  | 2.88   |                                                 | 1083.51 | 90.202  | 1946   | 1 | 1083.51 | -6.87  |
| P0A1V4 KAD_SALTY Adenylate kinase                                        | 1  |                      | LVEYHQMTAPLIGYYQK                  | 167 | 17 | 4  | 24.83  | y5y6y11y17                                      | 2054.02 | 68.964  | 71561  | 3 | 685.35  | -9.75  |
| P0A1V4 KAD_SALTY Adenylate kinase                                        | 2  |                      | YGIPQISTGDMLR                      | 23  | 13 | 7  | 33.84  | b5°b5y7y10*y10y12y13                            | 1450.74 | 72.187  | 44395  | 2 | 725.87  | 1.60   |
| P0A1V4 KAD_SALTY Adenylate kinase                                        | 3  |                      | NGFLLDGFPR                         | 78  | 10 | 6  | 42.89  | b3y4y5y6°y6y10                                  | 1135.58 | 80.440  | 32025  | 2 | 568.30  | -5.80  |
| P0A1V4 KAD_SALTY Adenylate kinase                                        | 4  |                      | IILLGAPGAGK                        | 2   | 11 | 5  | 36.49  | b2b3y4y5y9                                      | 1009.63 | 60.678  | 27546  | 2 | 505.32  | -8.16  |
| P0A1V4 KAD_SALTY Adenylate kinase                                        | 5  |                      | IILLGAPGAGKGTQAQFIMEK              | 2   | 21 | 4  | 21.52  | b3y7y17y19                                      | 2143.18 | 72.296  | 35720  | 3 | 715.07  | -5.58  |
| P0A1V4 KAD_SALTY Adenylate kinase                                        | 6  |                      | GTQAQFIMEKYGIPQISTGDMLR            | 13  | 23 | 4  | 12.95  | b3°b3b8y7                                       | 2584.28 | 90.381  | 5393   | 3 | 862.10  | -2.55  |
| P0A1V4 KAD_SALTY Adenylate kinase                                        | 7  |                      | QAKDIMDAGK                         | 47  | 10 | 3  | 26.73  | b3b7y5                                          | 1076.55 | 25.807  | 4046   | 3 | 359.52  | 9.30   |
| P0A1V4 KAD_SALTY Adenylate kinase                                        | 8  |                      | RLVEYHQMTAPLIGYYQK                 | 166 | 18 | 3  | 22.61  | y4y6y11                                         | 2210.11 | 84.677  | 2383   | 2 | 1105.56 | -13.48 |
| P0A1V4 KAD_SALTY Adenylate kinase                                        | 9  |                      | NGFLLDGFPR TIPQADAMK               | 78  | 19 | 4  | 14.82  | b3°b3y3y9                                       | 2091.09 | 87.980  | 2150   | 2 | 1046.05 | 7.71   |
| P0A1V4 KAD_SALTY Adenylate kinase                                        | 10 | Oxidation+M(7)       | LVEYHQMTAPLIGYYQK                  | 167 | 17 | 5  | 16.18  | b6°b6b13y11*y11                                 | 2070.04 | 94.992  | 2764   | 2 | 1035.52 | 2.83   |
| P0A1V4 KAD_SALTY Adenylate kinase                                        | 11 |                      | LVEYHQMTAPLIGY                     | 167 | 14 | 2  | 7.29   | y9°y9                                           | 1634.81 | 68.960  | 2574   | 2 | 817.91  | -8.51  |
| P65889 PUR7_SALTY Phohoribosylaminoimidazole-succinocarboxamide synthase | 1  |                      | LAEAGIPTQMER                       | 60  | 12 | 9  | 83.46  | b4y3y5y6y8y9y10*y10y12                          | 1315.67 | 49.364  | 42246  | 2 | 658.34  | 1.11   |
| P65889 PUR7_SALTY Phohoribosylaminoimidazole-succinocarboxamide synthase | 2  | Carbamidomethyl+C(7) | LLSDTECLVK                         | 72  | 10 | 5  | 33.72  | b2y1y5y7y8                                      | 1177.61 | 52.909  | 37899  | 2 | 589.31  | -0.83  |

|                                                                                 |    |                |                                   |     |    |    |       |                                   |         |         |        |   |         |        |
|---------------------------------------------------------------------------------|----|----------------|-----------------------------------|-----|----|----|-------|-----------------------------------|---------|---------|--------|---|---------|--------|
| P65889 PUR7_SALTY<br>Phohoribosylaminoimidazole-<br>succinocarboxamide synthase | 3  |                | TVYSTENPDLLVLEFR                  | 13  | 16 | 4  | 17.02 | b3y4°y4y10                        | 1895.98 | 88.014  | 32249  | 2 | 948.50  | 4.57   |
| P65889 PUR7_SALTY<br>Phohoribosylaminoimidazole-<br>succinocarboxamide synthase | 4  |                | QSLGGLIEAYEAVHR                   | 215 | 16 | 5  | 27.46 | b13y6°y6y10y14                    | 1713.86 | 84.906  | 29179  | 3 | 571.96  | -16.60 |
| P65889 PUR7_SALTY<br>Phohoribosylaminoimidazole-<br>succinocarboxamide synthase | 5  |                | GMVNNK                            | 46  | 6  | 1  | 13.56 | b5                                | 662.33  | 41.432  | 12909  | 1 | 662.33  | 5.53   |
| P65889 PUR7_SALTY<br>Phohoribosylaminoimidazole-<br>succinocarboxamide synthase | 6  |                | FNHFIMTK                          | 52  | 8  | 9  | 96.29 | b5b6b7y3y4y6°y6y7°y7              | 1037.52 | 136.265 | 2342   | 1 | 1037.52 | -8.24  |
| P65889 PUR7_SALTY<br>Phohoribosylaminoimidazole-<br>succinocarboxamide synthase | 7  |                | LGVEEGMELNPPIFDLFLK               | 104 | 19 | 3  | 14.82 | b4b14y12                          | 2161.12 | 76.859  | 2121   | 2 | 1081.07 | -0.34  |
| P65889 PUR7_SALTY<br>Phohoribosylaminoimidazole-<br>succinocarboxamide synthase | 8  |                | FRQSLGGLIEAYEAVHR                 | 213 | 18 | 5  | 36.38 | b14y8y9y10°y10                    | 2017.06 | 69.936  | 54797  | 4 | 505.02  | -1.94  |
| P65889 PUR7_SALTY<br>Phohoribosylaminoimidazole-<br>succinocarboxamide synthase | 9  |                | ETLDKMDK                          | 203 | 8  | 4  | 35.91 | b4b6°b6y5                         | 979.46  | 120.033 | 1670   | 1 | 979.46  | -13.46 |
| P0A2A7 RL30_SALTY 50S ribosomal<br>protein L30                                  | 1  |                | GMVNAVSMVK                        | 45  | 11 | 8  | 47.42 | b2b4b5b10y1y2y5y8                 | 1182.60 | 72.809  | 103403 | 2 | 591.80  | -1.86  |
| P0A2A7 RL30_SALTY 50S ribosomal<br>protein L30                                  | 2  |                | ATLLGLGLR                         | 21  | 9  | 3  | 38.08 | y5y6y7                            | 913.57  | 73.550  | 44847  | 2 | 457.29  | -12.29 |
| P0A2A7 RL30_SALTY 50S ribosomal<br>protein L30                                  | 3  |                | EDTPAVRGMVNAVSMVK                 | 38  | 18 | 4  | 21.55 | b9b11y4y8                         | 1950.97 | 100.432 | 6989   | 2 | 975.99  | -2.63  |
| P0A2A7 RL30_SALTY 50S ribosomal<br>protein L30                                  | 4  |                | ATLLGLGLR                         | 21  | 9  | 0  | 1.64  |                                   | 895.56  | 73.545  | 1592   | 2 | 448.29  | -4.63  |
| P0A1P6 GLNA_SALTY Glutamine<br>synthetase                                       | 1  |                | LVPGYEAPVMLAYSAR                  | 322 | 16 | 11 | 73.64 | b2b5b15y4y5°y5y9y11y13°<br>y13y14 | 1736.91 | 76.881  | 37328  | 2 | 868.96  | 2.46   |
| P0A1P6 GLNA_SALTY Glutamine<br>synthetase                                       | 2  |                | AINALANPTTNSYKR                   | 307 | 15 | 7  | 52.07 | b2y4y8y9y10y13y15                 | 1633.87 | 42.381  | 28744  | 3 | 545.29  | 1.64   |
| P0A1P6 GLNA_SALTY Glutamine<br>synthetase                                       | 3  |                | GGYFPVPPVDSAQDIR                  | 177 | 16 | 9  | 48.43 | b2b3b12y2y5y7y10y12y16            | 1717.87 | 69.523  | 28027  | 2 | 859.44  | 6.68   |
| P0A1P6 GLNA_SALTY Glutamine<br>synthetase                                       | 4  |                | AINALANPTTNSYK                    | 307 | 14 | 5  | 27.7  | y2y5y9y12°y12                     | 1477.77 | 47.334  | 15882  | 2 | 739.39  | 1.65   |
| P0A1P6 GLNA_SALTY Glutamine<br>synthetase                                       | 5  |                | ATGIADTVLFGPEPEFFLFDDIR           | 117 | 23 | 11 | 58.91 | b2b4b6y2y3y5y6y9y10y11<br>y23     | 2570.26 | 116.898 | 11626  | 3 | 857.43  | -7.03  |
| P0A1P6 GLNA_SALTY Glutamine<br>synthetase                                       | 6  |                | EIPQVAGSLEEALNALDLDR              | 406 | 20 | 6  | 31.95 | b16y6y7y10y13y20                  | 2153.10 | 80.911  | 3233   | 2 | 1077.05 | -5.10  |
| P0A1P6 GLNA_SALTY Glutamine<br>synthetase                                       | 7  |                | GINESDMVLPDASTAVIDPFFAD<br>STLIIR | 59  | 30 | 9  | 58.7  | b3b5b8b9b10b17y3y4y13             | 3238.58 | 113.078 | 16395  | 3 | 1080.20 | -5.65  |
| P0A1P6 GLNA_SALTY Glutamine<br>synthetase                                       | 8  |                | SAEHVLTMLNEHEVK                   | 1   | 15 | 6  | 36.81 | b5°b5b6b8y6y12                    | 1736.83 | 50.245  | 2002   | 3 | 579.62  | -19.12 |
| P0A1P6 GLNA_SALTY Glutamine<br>synthetase                                       | 9  |                | NLYDLPPEEAK                       | 395 | 11 | 3  | 24.13 | b8b10y8                           | 1288.65 | 58.975  | 1657   | 3 | 430.22  | 5.49   |
| P0A1P6 GLNA_SALTY Glutamine<br>synthetase                                       | 10 |                | GKEQHVTIPAHQVNAEFFEFGK            | 26  | 22 | 4  | 24.05 | b6b7b14y14                        | 2495.23 | 96.988  | 4231   | 3 | 832.42  | -0.29  |
| P0A1P6 GLNA_SALTY Glutamine<br>synthetase                                       | 11 |                | IHPGEAMDKNLYDLPPPEEAK             | 386 | 20 | 3  | 14.26 | b12y10y13                         | 2267.12 | 79.415  | 1831   | 2 | 1134.06 | 6.35   |
| P0A1P6 GLNA_SALTY Glutamine<br>synthetase                                       | 12 | Oxidation+M(9) | MSAEHVLTMLNEHEVK                  | 0   | 16 | 6  | 24.05 | b8b11y10°y10*y10y14               | 1883.90 | 75.616  | 21267  | 2 | 942.45  | 0.52   |
| P0A1P6 GLNA_SALTY Glutamine<br>synthetase                                       | 13 | Oxidation+M(8) | SAEHVLTMLNEHEVK                   | 1   | 15 | 3  | 17.99 | b12y7y12                          | 1752.87 | 94.975  | 1608   | 2 | 876.94  | 6.69   |
| P0A1P6 GLNA_SALTY Glutamine<br>synthetase                                       | 14 |                | NALANPTTNSYKR                     | 309 | 13 | 0  | 4.11  |                                   | 1449.74 | 42.418  | 2092   | 2 | 725.37  | -4.72  |
| Q7CPL7 RL17_SALTY 50S ribosomal<br>protein L17                                  | 1  |                | LFNELGPR                          | 78  | 8  | 10 | 66.98 | b7*y3y4y5°y5y6*y6y7*y7y<br>8      | 945.51  | 54.930  | 103038 | 2 | 473.26  | -7.55  |

|                                                    |    |                   |                                 |     |    |    |       |                                                          |         |         |        |   |         |        |
|----------------------------------------------------|----|-------------------|---------------------------------|-----|----|----|-------|----------------------------------------------------------|---------|---------|--------|---|---------|--------|
| Q7CPL7 RL17_SALTY 50S ribosomal protein L17        | 2  |                   | AGDNAPMAYIELVDR                 | 103 | 15 | 4  | 17.99 | b4y5y10y15                                               | 1634.79 | 78.542  | 52429  | 2 | 817.90  | 3.88   |
| Q7CPL7 RL17_SALTY 50S ribosomal protein L17        | 3  |                   | LAFAR                           | 64  | 5  | 1  | 13.15 | y3                                                       | 577.35  | 142.599 | 3403   | 1 | 577.35  | 13.64  |
| Q8ZQM3 GSIB_SALTY Glutathione-binding protein gsiB | 1  |                   | YISMNVTQKPFDNPK                 | 269 | 15 | 4  | 17.99 | b11b14y11y15                                             | 1781.88 | 75.782  | 115614 | 2 | 891.44  | -5.89  |
| Q8ZQM3 GSIB_SALTY Glutathione-binding protein gsiB | 2  |                   | DIGFHPVGTGPYQLETWNQTD<br>FV K   | 176 | 24 | 3  | 12.62 | b9b15y10                                                 | 2749.33 | 82.629  | 16862  | 3 | 917.11  | 0.18   |
| Q8ZQM3 GSIB_SALTY Glutathione-binding protein gsiB | 3  |                   | NLTGFWIMPDTGFSFDDADLK           | 491 | 21 | 11 | 50.21 | b2b3b11y1y2y6y7y8y13y15y21                               | 2390.13 | 106.351 | 15788  | 2 | 1195.57 | 10.11  |
| Q8ZQM3 GSIB_SALTY Glutathione-binding protein gsiB | 4  |                   | FQDGADFNAAAVK                   | 97  | 13 | 4  | 11.52 | b5y9*y11y13                                              | 1353.65 | 49.115  | 15626  | 2 | 677.33  | 1.98   |
| Q8ZQM3 GSIB_SALTY Glutathione-binding protein gsiB | 5  |                   | TEVVDPATVK                      | 134 | 10 | 9  | 67.8  | b1b2y2y5y6y7y8y9y10                                      | 1058.57 | 38.374  | 15016  | 2 | 529.79  | -1.04  |
| Q8ZQM3 GSIB_SALTY Glutathione-binding protein gsiB | 6  |                   | VLQFTQQQLAIGVK                  | 362 | 15 | 3  | 14.84 | b4*b4b10                                                 | 1700.98 | 71.476  | 10985  | 2 | 850.99  | 5.17   |
| Q8ZQM3 GSIB_SALTY Glutathione-binding protein gsiB | 7  |                   | ITAMDAGQR                       | 379 | 9  | 6  | 54.24 | b2y5°y5y6y7y8                                            | 962.47  | 28.443  | 10558  | 2 | 481.74  | -3.23  |
| Q8ZQM3 GSIB_SALTY Glutathione-binding protein gsiB | 8  |                   | SFYQGLFGLDKDMK                  | 56  | 14 | 4  | 31.31 | b7b9b11y13                                               | 1648.80 | 80.979  | 2577   | 2 | 824.90  | -2.07  |
| Q8ZQM3 GSIB_SALTY Glutathione-binding protein gsiB | 9  |                   | NLELVASPSIMQR                   | 256 | 13 | 4  | 20.48 | b4*b4y8y11                                               | 1457.77 | 68.068  | 10326  | 2 | 729.39  | -4.19  |
| Q8ZQM3 GSIB_SALTY Glutathione-binding protein gsiB | 10 |                   | YGKDIGFHPVGTGPYQLETWNQ<br>TDFVK | 173 | 27 | 12 | 75.28 | b6°b6b7b8°b8y4y5°y5y6*y6y7°y7                            | 3097.55 | 136.173 | 4071   | 3 | 1033.19 | 14.19  |
| Q8ZQM3 GSIB_SALTY Glutathione-binding protein gsiB | 11 |                   | QGVKFQDGADFNAAAVK               | 93  | 17 | 3  | 16.18 | b4b11y9                                                  | 1765.88 | 59.029  | 4065   | 2 | 883.44  | -4.36  |
| Q8ZQM3 GSIB_SALTY Glutathione-binding protein gsiB | 12 |                   | VKNVLAEGYTVSDDGLTYTITLR         | 70  | 23 | 3  | 23.04 | y3y4y11                                                  | 2528.33 | 54.706  | 3330   | 3 | 843.45  | 0.48   |
| Q8ZQM3 GSIB_SALTY Glutathione-binding protein gsiB | 13 |                   | ARITAMDAGQR                     | 377 | 11 | 3  | 31.12 | y5y8y9                                                   | 1189.62 | 106.478 | 2990   | 2 | 595.32  | 10.16  |
| Q8ZQM3 GSIB_SALTY Glutathione-binding protein gsiB | 14 |                   | DIGFHPVGTGPYQLETWNQTD<br>FV KVK | 176 | 26 | 3  | 18.21 | b5b14b23                                                 | 2976.48 | 101.624 | 2694   | 4 | 744.87  | -4.18  |
| Q8ZQM3 GSIB_SALTY Glutathione-binding protein gsiB | 15 |                   | TGFSFDDADLK                     | 501 | 11 | 1  | 7.68  | b4                                                       | 1215.57 | 106.249 | 1550   | 2 | 608.29  | 12.95  |
| P02906 SUBI_SALTY Sulfate-binding protein          | 1  |                   | YLYSPEGQEIAAK                   | 263 | 13 | 13 | 82.92 | b2b3b4°b4b11y1y2y6y7y9y10y11y13                          | 1468.74 | 50.109  | 68479  | 2 | 734.87  | 2.16   |
| P02906 SUBI_SALTY Sulfate-binding protein          | 2  |                   | LFTIDEVFGGWAK                   | 298 | 13 | 5  | 33.84 | b2b7y5y10y12                                             | 1482.77 | 101.753 | 46386  | 2 | 741.89  | 2.31   |
| P02906 SUBI_SALTY Sulfate-binding protein          | 3  |                   | NVEVLDSGAR                      | 183 | 10 | 4  | 33.72 | b2y4y5y8                                                 | 1059.54 | 39.539  | 41018  | 2 | 530.27  | -2.19  |
| P02906 SUBI_SALTY Sulfate-binding protein          | 4  |                   | QATSVINGIEADVVTALAYDVD<br>AIAER | 66  | 28 | 9  | 25.32 | b7b13°b13°b13y2y5y8°y8y9                                 | 2917.51 | 128.457 | 14932  | 3 | 973.17  | -3.35  |
| P02906 SUBI_SALTY Sulfate-binding protein          | 5  |                   | WNYLAAWGYALHHNNNDQAK            | 153 | 20 | 5  | 22.43 | b8°b8b11b13y3                                            | 2386.12 | 92.112  | 65498  | 3 | 796.05  | 5.73   |
| P02906 SUBI_SALTY Sulfate-binding protein          | 6  |                   | FEIVTPSESILAEPTVSVDK            | 226 | 21 | 5  | 21.52 | b10°b10y5y7y10                                           | 2260.22 | 76.766  | 61118  | 3 | 754.08  | 10.05  |
| P02906 SUBI_SALTY Sulfate-binding protein          | 7  |                   | DIQLLNVSYPTR                    | 20  | 13 | 3  | 20.48 | b3y5y9                                                   | 1533.77 | 82.173  | 10810  | 2 | 767.39  | -13.85 |
| P02906 SUBI_SALTY Sulfate-binding protein          | 8  |                   | NVEVLDSGARGSTNTFVER             | 183 | 19 | 20 | 97.13 | b4b5b8°b8b10°b10b12°b12y3y7°y7*y7y8*y8y9°y9*y9y10*y10y13 | 2051.04 | 136.273 | 2954   | 2 | 1026.03 | 14.28  |
| P02906 SUBI_SALTY Sulfate-binding protein          | 9  |                   | LFTIDEVFGGWAKAQK                | 298 | 16 | 4  | 17.02 | b6b9°b9y13                                               | 1809.98 | 101.128 | 2421   | 2 | 905.49  | 13.15  |
| P02906 SUBI_SALTY Sulfate-binding protein          | 10 | Phosphoryl STY(1) | YLYSPEGQEIAAK                   | 263 | 13 | 4  | 41.11 | y7y9y11y12                                               | 1548.71 | 79.693  | 27442  | 2 | 774.86  | 13.79  |
| Q8ZP20 TREA_SALTY Periplasmic trehalase            | 1  |                   | VAAAAQAHLLQPGGLATTSVK           | 428 | 21 | 3  | 22.22 | b4b5y19                                                  | 2004.11 | 57.392  | 19969  | 3 | 668.71  | -8.41  |

|                                           |    |                                             |                                       |     |    |    |       |                              |         |         |       |   |         |        |
|-------------------------------------------|----|---------------------------------------------|---------------------------------------|-----|----|----|-------|------------------------------|---------|---------|-------|---|---------|--------|
| Q8ZP20 TREA_SALTY Periplasmic trehalase   | 2  |                                             | TFADAIPNSDPLMILADYR                   | 68  | 19 | 11 | 49.64 | b6b7°b7b9*b13y2y4y5°y5y11y13 | 2123.06 | 101.017 | 12815 | 2 | 1062.03 | 4.71   |
| Q8ZP20 TREA_SALTY Periplasmic trehalase   | 3  |                                             | SNPNRPATEIYR                          | 296 | 12 | 4  | 26.09 | b7b8y10y12                   | 1417.71 | 32.759  | 3892  | 2 | 709.36  | -4.22  |
| Q8ZP20 TREA_SALTY Periplasmic trehalase   | 4  |                                             | TTTIAPVDLNALLYQLEK                    | 335 | 18 | 6  | 28.95 | b3°b3b8°b8y13y14             | 2003.10 | 103.215 | 18254 | 2 | 1002.05 | -5.00  |
| Q8ZP20 TREA_SALTY Periplasmic trehalase   | 5  |                                             | DQLTAAALFPLYVNAAAK                    | 405 | 18 | 3  | 22.61 | b4b7b14                      | 1877.00 | 96.526  | 8364  | 2 | 939.00  | -10.99 |
| Q8ZP20 TREA_SALTY Periplasmic trehalase   | 6  | Carbamidomethyl+C(6); Carbamidomethyl+C(12) | MLDLICPQEKPCDSVPSTRPASLS ATPTK        | 534 | 29 | 3  | 21.89 | b5b6y7                       | 3199.58 | 63.520  | 2814  | 3 | 1067.20 | -1.22  |
| Q8ZP20 TREA_SALTY Periplasmic trehalase   | 7  |                                             | FLTNVQHTYDR                           | 486 | 11 | 4  | 24.13 | b7b9y5°y5                    | 1393.72 | 80.040  | 1879  | 2 | 697.36  | 21.37  |
| Q8ZP20 TREA_SALTY Periplasmic trehalase   | 8  |                                             | SAAASGWDFSSR                          | 311 | 12 | 4  | 34.01 | b3y6y7y10                    | 1241.54 | 35.939  | 1782  | 3 | 414.52  | -7.77  |
| Q8ZP20 TREA_SALTY Periplasmic trehalase   | 9  | Carbamidomethyl+C(6); Carbamidomethyl+C(12) | MLDLICPQEKPCDSVPSTRPASLS ATPTKTPSAATQ | 534 | 36 | 4  | 10.88 | b4°b4y8y21                   | 3855.88 | 63.391  | 16244 | 4 | 964.73  | -2.41  |
| Q8ZP20 TREA_SALTY Periplasmic trehalase   | 10 |                                             | YWDDRDTPRPESWVEDIATAK                 | 275 | 21 | 3  | 22.22 | b10y14y15                    | 2550.18 | 87.221  | 10420 | 3 | 850.73  | -3.06  |
| Q8ZP20 TREA_SALTY Periplasmic trehalase   | 11 |                                             | FLTNVQHTYDREK                         | 486 | 13 | 4  | 29.72 | b8°b8b10b12                  | 1650.81 | 84.389  | 6688  | 3 | 550.94  | -10.65 |
| Q8ZP20 TREA_SALTY Periplasmic trehalase   | 12 |                                             | ASAAAGDRAK                            | 357 | 10 | 6  | 39.88 | b3°b3b4°b4b6y8               | 917.49  | 21.960  | 4858  | 2 | 459.25  | 9.25   |
| Q8ZP20 TREA_SALTY Periplasmic trehalase   | 13 |                                             | MQRNQSGFDLR                           | 87  | 11 | 4  | 41.26 | b4b6b10y7                    | 1351.67 | 93.023  | 3982  | 2 | 676.34  | 11.20  |
| Q8ZP20 TREA_SALTY Periplasmic trehalase   | 14 | Oxidation+M(4)                              | VADMVANFGYEIDAWGHIPNGNR               | 183 | 23 | 4  | 12.95 | b3b6°b6y11                   | 2562.18 | 56.934  | 39105 | 3 | 854.73  | -2.10  |
| Q8ZP20 TREA_SALTY Periplasmic trehalase   | 15 |                                             | LATTSVK                               | 442 | 7  | 0  | 6.57  |                              | 719.43  | 57.471  | 1902  | 2 | 360.22  | -0.85  |
| Q8ZP20 TREA_SALTY Periplasmic trehalase   | 16 |                                             | TFADAIPNSDPLMILADYR                   | 68  | 19 | 1  | 7.44  | b8                           | 2105.03 | 100.918 | 2706  | 3 | 702.35  | -3.36  |
| P67179 YEB_C_SALTY UPF0082 protein yebC   | 1  |                                             | LGGGDPDANPR                           | 37  | 11 | 10 | 70.57 | b2b6y2y4y5°y5y6y9y10y11      | 1068.50 | 22.011  | 16914 | 2 | 534.75  | -5.26  |
| P67179 YEB_C_SALTY UPF0082 protein yebC   | 2  | Carbamidomethyl+C(1)                        | CGGNLGTDGSAYLFSK                      | 119 | 17 | 4  | 24.83 | y6y11y12y17                  | 1745.82 | 72.572  | 11960 | 2 | 873.41  | 3.01   |
| P67179 YEB_C_SALTY UPF0082 protein yebC   | 3  |                                             | DALEAAGLKADSAEVSMIPSTK                | 183 | 22 | 5  | 13.33 | b3°b3b12°b12y4               | 2204.10 | 67.194  | 19538 | 3 | 735.37  | -5.43  |
| P60726 RL4_SALTY 50S ribosomal protein L4 | 1  |                                             | FSVEAPK                               | 123 | 7  | 5  | 40.27 | y1y2y3y5y6                   | 777.41  | 40.862  | 44754 | 2 | 389.21  | -9.26  |
| P60726 RL4_SALTY 50S ribosomal protein L4 | 2  |                                             | DATGIDPVSLIAFDK                       | 170 | 15 | 6  | 17.99 | b4y2y4°y4y10y15              | 1561.81 | 87.464  | 39117 | 2 | 781.41  | 2.34   |
| P60726 RL4_SALTY 50S ribosomal protein L4 | 3  |                                             | DFNEALVHQVVVAYAAGAR                   | 21  | 19 | 6  | 41.78 | b2b10b15y6y7y8               | 2030.05 | 83.231  | 23629 | 3 | 677.36  | 2.59   |
| P60726 RL4_SALTY 50S ribosomal protein L4 | 4  |                                             | QVEEMLA                               | 194 | 7  | 4  | 40.27 | b3b6y6y7                     | 819.39  | 50.868  | 20283 | 1 | 819.39  | 3.43   |
| P60726 RL4_SALTY 50S ribosomal protein L4 | 5  |                                             | DAQSALTVSETTFGRDFNEALVH QVVVAYAAGAR   | 6   | 34 | 3  | 10.96 | b7b12y16                     | 3593.75 | 104.933 | 5934  | 4 | 899.19  | -13.45 |
| P60726 RL4_SALTY 50S ribosomal protein L4 | 6  |                                             | VVMTADAVK                             | 185 | 9  | 3  | 30.3  | b3y5y8                       | 933.52  | 44.538  | 11670 | 2 | 467.26  | 14.25  |
| P60726 RL4_SALTY 50S ribosomal protein L4 | 7  |                                             | SGGVTF AARPQDHSQK                     | 79  | 16 | 11 | 60.51 | b5b6b7b10y5°y5*y5y7°y7y8*y8  | 1685.81 | 93.014  | 3729  | 2 | 843.41  | -17.31 |
| P60726 RL4_SALTY 50S ribosomal protein L4 | 8  |                                             | DATGIDPVSLIAFDKVVMTADAV K             | 170 | 24 | 7  | 44.06 | b3b9y7°y7y8y18y19            | 2476.30 | 101.460 | 46218 | 3 | 826.11  | 0.99   |
| P60726 RL4_SALTY 50S ribosomal protein L4 | 9  |                                             | LKDMALEDVLIITGELDENLFLAA R            | 137 | 25 | 6  | 39.08 | b5°b5b6b7y3y5                | 2802.50 | 136.340 | 11147 | 3 | 934.84  | 1.05   |
| P60726 RL4_SALTY 50S ribosomal protein L4 | 10 |                                             | SPIWRSGGVTF AARPQDHSQK                | 74  | 21 | 4  | 22.22 | b11b12°b12y8                 | 2325.21 | 98.211  | 9203  | 3 | 775.74  | 10.92  |

|                                                 |    |                       |                                         |     |    |    |        |                                               |         |         |        |   |         |        |
|-------------------------------------------------|----|-----------------------|-----------------------------------------|-----|----|----|--------|-----------------------------------------------|---------|---------|--------|---|---------|--------|
| [P60726]RL4_SALTY 50S ribosomal protein L4      | 11 |                       | DFNEALVHQVVVAYAAGARQGT<br>R             | 21  | 23 | 3  | 21.98  | b8b9y10                                       | 2472.28 | 63.156  | 6486   | 3 | 824.76  | 0.59   |
| [P60726]RL4_SALTY 50S ribosomal protein L4      | 12 |                       | ELVLKDAQSALTVSETTFGR                    | 1   | 20 | 3  | 23.68  | y7y9y10                                       | 2165.17 | 108.200 | 4219   | 3 | 722.40  | 12.74  |
| [P60726]RL4_SALTY 50S ribosomal protein L4      | 13 |                       | VVMTADAVKQVEMLA                         | 185 | 16 | 8  | 59.84  | b4b5b6*b6b10y4y9y14                           | 1733.86 | 87.778  | 3304   | 2 | 867.43  | -14.29 |
| [P60726]RL4_SALTY 50S ribosomal protein L4      | 14 | Phosphoryl STY(7)     | VDVRDATGIDPVSLIAFDK                     | 166 | 19 | 4  | 14.82  | b5*b5y4y13                                    | 2111.02 | 71.485  | 8941   | 3 | 704.34  | -7.52  |
| [P60726]RL4_SALTY 50S ribosomal protein L4      | 15 | Phosphoryl STY(4)     | A EVTGSGKKPWR                           | 49  | 12 | 5  | 34.01  | b3b10b11*b11y9                                | 1395.68 | 68.093  | 8354   | 3 | 465.90  | 5.16   |
| [P60726]RL4_SALTY 50S ribosomal protein L4      | 16 | Oxidation+M(4)        | LKDMALEDVLIITGELDENLFLAA<br>R           | 137 | 25 | 4  | 35.25  | b6b7b8y12                                     | 2818.51 | 88.640  | 24466  | 3 | 940.17  | 6.15   |
| [P66692]RPIA_SALTY Ribose-5-phohate isomerase A | 1  | Carbamidomethyl+C(3)  | FICIADASK                               | 112 | 9  | 7  | 52.99  | b1b2b5y3y5y7y9                                | 1024.51 | 50.588  | 30881  | 2 | 512.76  | -0.71  |
| [P66692]RPIA_SALTY Ribose-5-phohate isomerase A | 2  |                       | GADVALIGTPDGVK                          | 201 | 14 | 6  | 31.31  | b6y2y3y5y7y14                                 | 1312.71 | 56.854  | 27126  | 2 | 656.86  | 2.05   |
| [P66692]RPIA_SALTY Ribose-5-phohate isomerase A | 3  |                       | GQIEGAVSSSDASTEK                        | 43  | 16 | 4  | 17.02  | b2b3b9y9                                      | 1565.74 | 30.995  | 8174   | 2 | 783.37  | 4.83   |
| [P66692]RPIA_SALTY Ribose-5-phohate isomerase A | 4  |                       | AVGWAALQYVQPGTIVGVGTGST<br>AAHFIDALGTMK | 8   | 35 | 5  | 16.83  | b4b9b11y9y19                                  | 3487.80 | 107.195 | 67255  | 3 | 1163.27 | -1.19  |
| [P66692]RPIA_SALTY Ribose-5-phohate isomerase A | 5  |                       | GLGIHVFDLNEVDSLGIYVDGADE<br>INGHMQMIK   | 61  | 33 | 6  | 51.31  | b11b12b15b16y9y10                             | 3599.73 | 103.674 | 5788   | 3 | 1200.58 | -7.12  |
| [P66692]RPIA_SALTY Ribose-5-phohate isomerase A | 6  |                       | GQIEGAVSSSDASTEKLK                      | 43  | 18 | 7  | 34.38  | b3*b3b4*b4b7b11y11                            | 1806.90 | 38.518  | 4355   | 2 | 903.95  | -4.05  |
| [P66170]RL29_SALTY 50S ribosomal protein L29    | 1  |                       | MQAASGQLQQSHLLK                         | 29  | 15 | 17 | 110.69 | b1b2*b2b3y1y2y3y5y7*y7<br>*y7y8y9y11y12y13y15 | 1639.84 | 44.603  | 258083 | 3 | 547.28  | -12.21 |
| [P66170]RL29_SALTY 50S ribosomal protein L29    | 2  |                       | SVEELNTELLNLLR                          | 9   | 14 | 9  | 56.36  | b1b3b4b9*b9b10y4y9y14                         | 1642.90 | 101.028 | 134914 | 2 | 821.96  | 1.49   |
| [P66170]RL29_SALTY 50S ribosomal protein L29    | 3  |                       | EQFNLR                                  | 23  | 6  | 4  | 26.71  | y3*y3y4*y4                                    | 806.41  | 41.694  | 72324  | 2 | 403.71  | -6.96  |
| [P66170]RL29_SALTY 50S ribosomal protein L29    | 4  |                       | AASGQLQQSHLLK                           | 31  | 13 | 5  | 26.07  | b5*b5*b5b10b12                                | 1380.75 | 44.588  | 4500   | 2 | 690.88  | -3.80  |
| [O54296]RS11_SALTY 30S ribosomal protein S11    | 1  |                       | ALNAAGFR                                | 98  | 8  | 5  | 40.68  | y4y5y6*y6y8                                   | 819.45  | 41.593  | 30825  | 2 | 410.23  | -1.04  |
| [O54296]RS11_SALTY 30S ribosomal protein S11    | 2  |                       | QGNALGWATAGGSGFR                        | 37  | 16 | 7  | 42.37  | b5y2y6y10y11y12y16                            | 1549.76 | 65.556  | 21754  | 2 | 775.38  | 3.70   |
| [O54296]RS11_SALTY 30S ribosomal protein S11    | 3  |                       | QVSDGVAHIHASFNNTIVTTDR                  | 14  | 23 | 10 | 44.74  | b3*b3*b3b4*b4b14b15*b15<br>y3y5               | 2495.23 | 101.180 | 5166   | 2 | 1248.12 | -11.94 |
| [O54296]RS11_SALTY 30S ribosomal protein S11    | 4  | Carbamidomethyl+C(13) | STPFAAQVAAERCADAVK                      | 57  | 18 | 3  | 15.45  | b4b7y6                                        | 1891.92 | 135.609 | 2527   | 2 | 946.46  | -7.87  |
| [P0A2B3]RS7_SALTY 30S ribosomal protein S7      | 1  |                       | FGSELLAK                                | 17  | 8  | 6  | 40.68  | b2y2y3y4y7y8                                  | 864.47  | 51.212  | 96912  | 2 | 432.74  | -9.32  |
| [P0A2B3]RS7_SALTY 30S ribosomal protein S7      | 2  |                       | WIVEAAR                                 | 102 | 7  | 7  | 50.41  | b1b4y4*y4y5y6y7                               | 844.46  | 50.043  | 52636  | 2 | 422.73  | -8.17  |
| [P0A2B3]RS7_SALTY 30S ribosomal protein S7      | 3  |                       | FVNILMVDGKK                             | 25  | 11 | 4  | 47.28  | y3y5y6y7                                      | 1263.70 | 66.820  | 52107  | 3 | 421.90  | -12.56 |
| [P0A2B3]RS7_SALTY 30S ribosomal protein S7      | 4  |                       | VGGSTYQVPVEVRPVR                        | 79  | 17 | 3  | 24.83  | b3b6b7                                        | 1899.04 | 49.992  | 19636  | 4 | 475.51  | -10.93 |
| [P0A2B3]RS7_SALTY 30S ribosomal protein S7      | 5  |                       | STAESIVYSALETLAQR                       | 36  | 17 | 3  | 23.17  | b11y4y5                                       | 1838.92 | 106.648 | 29896  | 3 | 613.65  | -15.60 |
| [P0A2B3]RS7_SALTY 30S ribosomal protein S7      | 6  |                       | LANELSDAADNK                            | 119 | 12 | 3  | 35.33  | y7y8y9                                        | 1260.62 | 36.980  | 8345   | 2 | 630.81  | 6.68   |
| [P0A2B3]RS7_SALTY 30S ribosomal protein S7      | 7  |                       | NALAMR                                  | 96  | 6  | 2  | 26.71  | y4y5                                          | 675.36  | 35.491  | 6075   | 1 | 675.36  | 0.36   |
| [P0A2B3]RS7_SALTY 30S ribosomal protein S7      | 8  |                       | ILPDPK                                  | 11  | 6  | 1  | 13.56  | y4                                            | 682.41  | 31.885  | 3413   | 1 | 682.41  | -1.88  |
| [P0A2B3]RS7_SALTY 30S ribosomal protein S7      | 9  |                       | LANELSDAADNKGTA VK                      | 119 | 17 | 13 | 112.25 | b3*b3b4*b4b14y5y8y9y10<br>y12y13y15y16        | 1716.86 | 38.622  | 146558 | 3 | 572.96  | -11.09 |



|                                              |    |                                           |                                               |     |    |    |       |                                  |         |         |       |   |         |        |
|----------------------------------------------|----|-------------------------------------------|-----------------------------------------------|-----|----|----|-------|----------------------------------|---------|---------|-------|---|---------|--------|
| P0A2B3 RS7_SALTY 30S ribosomal protein S7    | 10 |                                           | RNALAMR                                       | 95  | 7  | 3  | 40.27 | y3y5y6                           | 831.46  | 30.544  | 6705  | 2 | 416.23  | -3.01  |
| P0A2B3 RS7_SALTY 30S ribosomal protein S7    | 11 |                                           | AFAHYRW                                       | 149 | 7  | 3  | 37.26 | b6y5y6                           | 950.46  | 114.660 | 1596  | 1 | 950.46  | -6.36  |
| P0A2B3 RS7_SALTY 30S ribosomal protein S7    | 12 | Oxidation+M(6)                            | FVNILMVDGK                                    | 25  | 10 | 3  | 28.49 | b3b4y7                           | 1151.61 | 36.283  | 2880  | 3 | 384.54  | -0.32  |
| Q7CPE1 ATPA_SALTY ATP synthase subunit alpha | 1  |                                           | IGSFEAALLAYVDRDHAPLMQEIN<br>QSGGYNDEIEGK      | 463 | 36 | 7  | 14.79 | b2b13y2y3y7°y7y14                | 3950.88 | 95.720  | 55147 | 4 | 988.48  | -1.11  |
| Q7CPE1 ATPA_SALTY ATP synthase subunit alpha | 2  |                                           | DSVGAVVMGPYADLAEGMK                           | 68  | 19 | 9  | 49.64 | b5b6b8b12y1y2y10y11y13           | 1909.91 | 82.965  | 39781 | 2 | 955.46  | 4.41   |
| Q7CPE1 ATPA_SALTY ATP synthase subunit alpha | 3  |                                           | AVDSMIPIGR                                    | 151 | 10 | 4  | 33.72 | y4y5y8y10                        | 1058.56 | 59.523  | 36720 | 2 | 529.79  | -2.77  |
| Q7CPE1 ATPA_SALTY ATP synthase subunit alpha | 4  |                                           | ILEVPVGR                                      | 93  | 8  | 4  | 40.68 | y4y5y6y8                         | 882.53  | 52.088  | 31001 | 2 | 441.77  | -9.20  |
| Q7CPE1 ATPA_SALTY ATP synthase subunit alpha | 5  |                                           | QSVDQPQVTGYK                                  | 139 | 12 | 6  | 44.68 | b12y7y8y9y11y12                  | 1349.67 | 33.353  | 21286 | 2 | 675.34  | 0.09   |
| Q7CPE1 ATPA_SALTY ATP synthase subunit alpha | 6  |                                           | ELAAFSQFASDLDDATRK                            | 401 | 18 | 5  | 24.62 | b12*b14y6y8y10                   | 1984.98 | 72.461  | 3969  | 2 | 992.99  | 7.99   |
| Q7CPE1 ATPA_SALTY ATP synthase subunit alpha | 7  |                                           | MQLNSTEISELIK                                 | 0   | 13 | 6  | 45.81 | b10b11°b11y3y10y11               | 1505.79 | 76.238  | 38757 | 2 | 753.40  | -1.86  |
| Q7CPE1 ATPA_SALTY ATP synthase subunit alpha | 8  |                                           | ELAAFSQFASDLDDATR                             | 401 | 17 | 3  | 16.18 | b12y6y9                          | 1856.88 | 88.089  | 22186 | 2 | 928.94  | 7.49   |
| Q7CPE1 ATPA_SALTY ATP synthase subunit alpha | 9  |                                           | GYLADVELAK                                    | 453 | 10 | 4  | 39.09 | b6b8y6y8                         | 1078.57 | 68.052  | 19766 | 2 | 539.79  | -9.51  |
| Q7CPE1 ATPA_SALTY ATP synthase subunit alpha | 10 |                                           | DHAPLMQEINQSGGYNDEIEGK                        | 477 | 22 | 6  | 45.5  | b3b8y8y9y13y14                   | 2445.13 | 93.134  | 7906  | 4 | 612.04  | 12.88  |
| Q7CPE1 ATPA_SALTY ATP synthase subunit alpha | 11 |                                           | IAQFNVVSEAHNEGATIVSVSDGVI<br>R                | 15  | 25 | 5  | 12.32 | b16°b16y4y13°y13                 | 2641.40 | 136.697 | 6325  | 2 | 1321.21 | 17.75  |
| Q7CPE1 ATPA_SALTY ATP synthase subunit alpha | 12 | Carbamidomethyl+C(7)                      | IHGLADCMQGEMISLPGNR                           | 40  | 19 | 3  | 14.82 | b3b7y4                           | 2098.99 | 47.003  | 2634  | 3 | 700.33  | 3.02   |
| Q7CPE1 ATPA_SALTY ATP synthase subunit alpha | 13 |                                           | VVNTLGAPIDGKGPVDNDGFSAV<br>EAIAPGVIDR         | 106 | 33 | 11 | 37.03 | b4°b4b5°b5b27y3°y3y6°y6<br>y7y10 | 3263.70 | 83.535  | 54472 | 3 | 1088.57 | 1.35   |
| Q7CPE1 ATPA_SALTY ATP synthase subunit alpha | 14 |                                           | VNADYVEAFTKGEVK                               | 303 | 15 | 3  | 17.99 | b6y7y9                           | 1669.83 | 63.145  | 39845 | 3 | 557.28  | -10.60 |
| Q7CPE1 ATPA_SALTY ATP synthase subunit alpha | 15 |                                           | AARVNADYVEAFTK                                | 300 | 14 | 4  | 24.57 | b13°b13y9y10                     | 1554.77 | 77.744  | 5666  | 2 | 777.89  | -12.80 |
| Q7CPE1 ATPA_SALTY ATP synthase subunit alpha | 16 | Carbamidomethyl+C(33)                     | KLEEHGALANTIVVVATASESAAL<br>QYLAPYAGCAMGEYFR  | 210 | 40 | 7  | 34.72 | b4°b4y3y4°y4y5y7                 | 4272.12 | 136.248 | 5559  | 4 | 1068.78 | 1.14   |
| Q7CPE1 ATPA_SALTY ATP synthase subunit alpha | 17 | Oxidation+M(8)                            | DSVGAVVMGPYADLAEGMK                           | 68  | 19 | 7  | 38.78 | b3b8°b8y4y6y7y13                 | 1925.93 | 57.479  | 4885  | 3 | 642.65  | 14.45  |
| Q7CPE1 ATPA_SALTY ATP synthase subunit alpha | 18 | Carbamidomethyl+C(32)<br>;Oxidation+M(34) | LEEHGALANTIVVVATASESAALQ<br>YLAPYAGCAMGEYFRDR | 211 | 41 | 8  | 15.02 | b4b8°b8b10°b10y5°y5y7            | 4431.11 | 136.216 | 4524  | 5 | 887.03  | -6.28  |
| Q7CPE1 ATPA_SALTY ATP synthase subunit alpha | 19 | Oxidation+M(17)                           | YAIALNLERDSVGAVVMGPYADL<br>AEGMK              | 59  | 28 | 3  | 22.66 | y5y12y13                         | 2969.50 | 122.750 | 1818  | 4 | 743.13  | 6.91   |
| P77983 KPYK1_SALTY Pyruvate kinase I         | 1  |                                           | GDLGVEIPVEEVIFAQK                             | 244 | 17 | 9  | 54.28 | b2°b2b6b7b8y1y3y4y12             | 1842.99 | 94.198  | 31672 | 2 | 922.00  | 3.31   |
| P77983 KPYK1_SALTY Pyruvate kinase I         | 2  |                                           | IENQEGLNNFDEILEASDGIMVAR                      | 220 | 24 | 5  | 35.3  | b9b10y1y3y4                      | 2677.28 | 95.773  | 10976 | 3 | 893.10  | 2.37   |
| P77983 KPYK1_SALTY Pyruvate kinase I         | 3  | Carbamidomethyl+C(3)                      | IVCTIGPK                                      | 5   | 8  | 5  | 49.06 | b5y3y6y7y8                       | 887.49  | 35.467  | 9899  | 2 | 444.25  | -9.49  |
| P77983 KPYK1_SALTY Pyruvate kinase I         | 4  |                                           | AEAGDVANAILDGTDAVMLSGES<br>AK                 | 292 | 25 | 3  | 18.55 | y6y11y16                         | 2405.16 | 91.623  | 5375  | 2 | 1203.08 | 3.76   |
| P77983 KPYK1_SALTY Pyruvate kinase I         | 5  |                                           | YFPDATILALTNEVTAR                             | 389 | 18 | 4  | 22.86 | b7b8y10°y10                      | 1996.03 | 51.556  | 14970 | 3 | 666.01  | -4.40  |
| P77983 KPYK1_SALTY Pyruvate kinase I         | 6  |                                           | KYFPDATILALTNEVTAR                            | 388 | 19 | 4  | 23.46 | b4b6b8y7                         | 2124.12 | 83.430  | 5773  | 3 | 708.71  | -6.67  |
| P77983 KPYK1_SALTY Pyruvate kinase I         | 7  | Carbamidomethyl+C(3)                      | VICKVLNNGDLGENK                               | 141 | 15 | 5  | 26.07 | y3y4*y4y10°y10                   | 1672.88 | 125.743 | 5347  | 2 | 836.95  | 9.19   |

|                                                     |    |                                             |                                           |     |    |    |       |                                                     |         |         |        |   |         |        |
|-----------------------------------------------------|----|---------------------------------------------|-------------------------------------------|-----|----|----|-------|-----------------------------------------------------|---------|---------|--------|---|---------|--------|
| [P77983]KPYK1_SALTY Pyruvate kinase I               | 8  |                                             | NPRPTRAEAGDVANAILDGTDAV<br>MLSGESAK       | 286 | 31 | 4  | 11.21 | b8b10*b10y23                                        | 3126.50 | 75.495  | 3753   | 3 | 1042.84 | -14.68 |
| [P77983]KPYK1_SALTY Pyruvate kinase I               | 9  | Oxidation+M(18)                             | AEAGDVANAILDGTDAVMLSGES<br>AK             | 292 | 25 | 6  | 22.94 | b18y7y8°y8y12°y12                                   | 2421.14 | 81.921  | 8715   | 3 | 807.72  | -3.73  |
| [P77983]KPYK1_SALTY Pyruvate kinase I               | 10 | Carbamidomethyl+C(13)<br>;Oxidation+M(9)    | YPLEAVSIMATICER                           | 319 | 15 | 4  | 17.99 | b6°b6b11y4                                          | 1768.88 | 100.103 | 1879   | 3 | 590.30  | 13.46  |
| [P0A2I5]PARE_SALTY DNA<br>topoisomerase 4 subunit B | 1  | Carbamidomethyl+C(20)                       | GMPVDIHPEEGVPAVELILCR                     | 72  | 21 | 8  | 71.14 | b6b7b8b9b13b14y13y15                                | 2331.19 | 97.247  | 21007  | 3 | 777.74  | 4.29   |
| [P0A2I5]PARE_SALTY DNA<br>topoisomerase 4 subunit B | 2  |                                             | TELFLVEGDSAGGSAK                          | 411 | 16 | 5  | 17.02 | b2b15y6y9y16                                        | 1580.77 | 81.113  | 15348  | 2 | 790.89  | -8.26  |
| [P0A2I5]PARE_SALTY DNA<br>topoisomerase 4 subunit B | 3  | Carbamidomethyl+C(11)                       | QGLLDAMREFCEYR                            | 284 | 14 | 3  | 19.13 | b3y11y13                                            | 1787.82 | 78.496  | 4356   | 3 | 596.61  | -0.34  |
| [P0A2I5]PARE_SALTY DNA<br>topoisomerase 4 subunit B | 4  | Carbamidomethyl+C(2)                        | QCAAFVSGVVKDAFSLWLNQNV<br>QAAEQLAEMAIAAQR | 340 | 38 | 6  | 15.82 | b4b12b15y8*y8y10                                    | 4122.02 | 115.930 | 3261   | 4 | 1031.26 | -9.24  |
| [P0A2I5]PARE_SALTY DNA<br>topoisomerase 4 subunit B | 5  |                                             | LSAEDIWDR                                 | 306 | 9  | 6  | 30.3  | b4b9y2y4y6y9                                        | 1104.54 | 81.941  | 3187   | 1 | 1104.54 | 9.28   |
| [P0A2I5]PARE_SALTY DNA<br>topoisomerase 4 subunit B | 6  |                                             | LVQLTISDEDDQR                             | 585 | 13 | 4  | 25.25 | b11y11°y11y12                                       | 1531.79 | 98.759  | 20725  | 2 | 766.40  | 19.21  |
| [P0A2I5]PARE_SALTY DNA<br>topoisomerase 4 subunit B | 7  |                                             | EYQAIMPLK                                 | 432 | 9  | 3  | 38.08 | b3b4b8                                              | 1092.58 | 53.678  | 5194   | 2 | 546.79  | -0.34  |
| [P0A2I5]PARE_SALTY DNA<br>topoisomerase 4 subunit B | 8  |                                             | GDLADLDV                                  | 622 | 8  | 5  | 49.06 | b3y4y5°y5y6                                         | 817.40  | 128.712 | 1511   | 1 | 817.40  | 7.24   |
| [P0A2I5]PARE_SALTY DNA<br>topoisomerase 4 subunit B | 9  | Carbamidomethyl+C(14)                       | LTSGPALPGKLADCTAQDLNR                     | 390 | 21 | 4  | 23.42 | y5y6°y6y17                                          | 2198.10 | 115.143 | 29087  | 3 | 733.37  | -10.11 |
| [P0A2I5]PARE_SALTY DNA<br>topoisomerase 4 subunit B | 10 |                                             | NWLQEKGDLADLDV                            | 616 | 14 | 3  | 19.13 | b9b11y5                                             | 1615.78 | 78.706  | 3548   | 3 | 539.27  | -7.63  |
| [P0A2I5]PARE_SALTY DNA<br>topoisomerase 4 subunit B | 11 | Phosphoryl STY(10)                          | VDVILHADQSLEVIDDGR                        | 54  | 18 | 6  | 39.88 | b12*b12b13y7y9_H3PO4<br>y9y10_H3PO4 y10_HPO3<br>y10 | 2073.97 | 117.913 | 5920   | 3 | 691.99  | -3.77  |
| [P65882]PURA_SALTY Adenylosuccinate<br>synthetase   | 1  | Carbamidomethyl+C(19)                       | VGAGPFPTELFDETGEFLCK                      | 273 | 20 | 7  | 33.2  | b11y2y3y6y8y14y20                                   | 2214.05 | 99.535  | 18103  | 2 | 1107.53 | 5.51   |
| [P65882]PURA_SALTY Adenylosuccinate<br>synthetase   | 2  |                                             | VLDDTMAVADILTSMVVDVSDLL<br>DQAR           | 186 | 27 | 7  | 49.65 | b7y4y5y6y7y10°y10                                   | 2905.45 | 138.696 | 11473  | 3 | 969.15  | -1.26  |
| [P65882]PURA_SALTY Adenylosuccinate<br>synthetase   | 3  | Carbamidomethyl+C(7)                        | LLLSEACPLILDYHVALDNAR                     | 97  | 21 | 7  | 41.36 | b7y5°y5y6y8y9°y9                                    | 2396.26 | 91.223  | 9315   | 3 | 799.43  | -1.53  |
| [P65882]PURA_SALTY Adenylosuccinate<br>synthetase   | 4  |                                             | EVTTTPLAADDWK                             | 354 | 13 | 3  | 25.25 | b10b11y11                                           | 1446.71 | 80.298  | 7072   | 3 | 482.91  | -0.34  |
| [P65882]PURA_SALTY Adenylosuccinate<br>synthetase   | 5  |                                             | MGNNVVVLGTQWGDEGK                         | 0   | 17 | 11 | 72.51 | b8b15y3y4°y4y5y6°y6y8y1<br>5°y15                    | 1803.84 | 75.779  | 38385  | 3 | 601.95  | -17.46 |
| [P65882]PURA_SALTY Adenylosuccinate<br>synthetase   | 6  |                                             | EVMEYHNFQLVNYK                            | 163 | 15 | 3  | 24.01 | b10b11y9                                            | 1976.91 | 83.530  | 4495   | 3 | 659.64  | -5.62  |
| [P65882]PURA_SALTY Adenylosuccinate<br>synthetase   | 7  |                                             | GLRVGDLFDK                                | 145 | 10 | 3  | 26.73 | b9y5y7                                              | 1119.63 | 64.557  | 10379  | 2 | 560.32  | 13.63  |
| [P65882]PURA_SALTY Adenylosuccinate<br>synthetase   | 8  |                                             | GNNVVVLGTQWGDEGKGK                        | 1   | 18 | 5  | 26.38 | b6y11y13*y13y14                                     | 1857.93 | 58.355  | 9455   | 3 | 619.98  | -8.80  |
| [P65882]PURA_SALTY Adenylosuccinate<br>synthetase   | 9  |                                             | EVMEYHNFQLVNYKAEAVDYQ<br>K                | 163 | 23 | 6  | 37.11 | y4y6y7y11y14°y14                                    | 2881.36 | 93.079  | 5125   | 3 | 961.12  | 1.95   |
| [P65882]PURA_SALTY Adenylosuccinate<br>synthetase   | 10 | Carbamidomethyl+C(19)                       | VGAGPFPTELFDETGEFLCKQGNE<br>YGATTGR       | 273 | 31 | 4  | 11.21 | b8b16°b16y12                                        | 3348.59 | 94.979  | 3116   | 3 | 1116.87 | 11.23  |
| [P65882]PURA_SALTY Adenylosuccinate<br>synthetase   | 11 |                                             | EMKELEDR                                  | 82  | 8  | 4  | 32.9  | b3b4y3°y3                                           | 1049.49 | 84.652  | 2157   | 2 | 525.25  | -2.09  |
| [P65882]PURA_SALTY Adenylosuccinate<br>synthetase   | 12 | Carbamidomethyl+C(2)                        | LCVAYRMPDGR                               | 343 | 11 | 6  | 55.2  | b7b8y3y7y9°y9                                       | 1337.65 | 119.496 | 1529   | 1 | 1337.65 | -0.09  |
| [P65882]PURA_SALTY Adenylosuccinate<br>synthetase   | 13 | Carbamidomethyl+C(11)<br>;Phosphoryl STY(6) | AVQLNSLSGFCLTK                            | 318 | 14 | 3  | 19.13 | b3y7y10                                             | 1617.77 | 39.735  | 325248 | 3 | 539.93  | 4.83   |
| [P65882]PURA_SALTY Adenylosuccinate<br>synthetase   | 14 | Phosphoryl STY(4)                           | YVDYVLGILK                                | 258 | 10 | 3  | 26.73 | b3y3y8                                              | 1262.63 | 80.296  | 5448   | 2 | 631.82  | -5.80  |

|                                                                                          |    |                                             |                                      |     |    |    |       |                                      |         |         |       |   |         |        |
|------------------------------------------------------------------------------------------|----|---------------------------------------------|--------------------------------------|-----|----|----|-------|--------------------------------------|---------|---------|-------|---|---------|--------|
| P65882 PURA_SALTY Adenylosuccinate synthetase                                            | 15 | Oxidation+M(1)                              | MGNNVVVLGTQWGDEGK                    | 0   | 17 | 3  | 24.83 | y4y10y11                             | 1819.87 | 59.457  | 5158  | 3 | 607.29  | 1.68   |
| Q8ZN75 DAPE_SALTY Succinyl-diaminopimelate desuccinylase                                 | 1  | Carbamidomethyl+C(2); Carbamidomethyl+C(24) | SCPVIELTQQLIRRPSPDDAGCQALMIER        | 1   | 31 | 3  | 17.07 | b5b8b10                              | 3553.78 | 92.386  | 11179 | 3 | 1185.27 | -2.75  |
| Q8ZN75 DAPE_SALTY Succinyl-diaminopimelate desuccinylase                                 | 2  |                                             | FSTELTDEMIK                          | 257 | 11 | 9  | 64.55 | b2b3b6b10y3y5°y5y6y11                | 1313.62 | 67.198  | 7359  | 2 | 657.32  | -3.72  |
| Q8ZN75 DAPE_SALTY Succinyl-diaminopimelate desuccinylase                                 | 3  | Carbamidomethyl+C(4)                        | LDYCLVGEPSSTEIVGDVVK                 | 154 | 20 | 5  | 40.56 | b7b8b11b12b20                        | 2180.05 | 85.712  | 5096  | 2 | 1090.53 | -12.21 |
| Q8ZN75 DAPE_SALTY Succinyl-diaminopimelate desuccinylase                                 | 4  |                                             | YTVDWWLSGQPFLTAR                     | 281 | 16 | 3  | 25.39 | b4b6b7                               | 1939.94 | 137.285 | 2001  | 2 | 970.48  | -13.78 |
| Q8ZN75 DAPE_SALTY Succinyl-diaminopimelate desuccinylase                                 | 5  |                                             | GETLAFAGHTDVVPAGDVDR                 | 57  | 20 | 5  | 27.75 | b7b9b13y11y17                        | 2027.00 | 104.342 | 12434 | 3 | 676.34  | 9.88   |
| Q8ZN75 DAPE_SALTY Succinyl-diaminopimelate desuccinylase                                 | 6  |                                             | GNDFFPATSMQVANIQAGTGSNNVIPGELFVQFNFR | 221 | 36 | 5  | 22.22 | y3*y3y6y9y18                         | 3887.84 | 106.003 | 3108  | 3 | 1296.62 | -9.36  |
| Q8ZN75 DAPE_SALTY Succinyl-diaminopimelate desuccinylase                                 | 7  | Carbamidomethyl+C(5)                        | GS LTCNLTIHG VQGHVAYPHLADNPVHR       | 178 | 28 | 3  | 21.85 | b9b10y13                             | 3063.48 | 132.705 | 2497  | 4 | 766.63  | -17.93 |
| Q8ZN75 DAPE_SALTY Succinyl-diaminopimelate desuccinylase                                 | 8  |                                             | LAF LITSDEEASAKNGTVK                 | 124 | 19 | 3  | 22.6  | b14b15y11                            | 1994.03 | 89.391  | 9186  | 3 | 665.35  | -6.00  |
| Q8ZN75 DAPE_SALTY Succinyl-diaminopimelate desuccinylase                                 | 9  |                                             | GRGETLAFAGHTDVVPAGDVDR               | 55  | 22 | 13 | 74.64 | b3b5b7°b7b9b11°b11y3y4y10°y10y11°y11 | 2240.09 | 136.245 | 2681  | 2 | 1120.55 | -5.23  |
| Q8ZN75 DAPE_SALTY Succinyl-diaminopimelate desuccinylase                                 | 10 | Carbamidomethyl+C(2); Carbamidomethyl+C(24) | SCPVIELTQQLIRRPSPDDAGCQALMIER        | 1   | 31 | 3  | 11.21 | b9y11y13                             | 3553.75 | 116.035 | 2636  | 4 | 889.19  | -10.99 |
| Q8ZN75 DAPE_SALTY Succinyl-diaminopimelate desuccinylase                                 | 11 | Carbamidomethyl+C(4)                        | LDYCLVGEPSSTEIVGDVVKNGR              | 154 | 23 | 3  | 19.36 | b3b6b13                              | 2507.22 | 84.915  | 1615  | 2 | 1254.11 | -10.71 |
| Q8ZN75 DAPE_SALTY Succinyl-diaminopimelate desuccinylase                                 | 12 | Carbamidomethyl+C(11);Oxidation+M(15)       | RPSLSPDDAGCQALMIER                   | 14  | 18 | 4  | 28.95 | b14b15y10y13                         | 2031.95 | 78.672  | 26389 | 3 | 677.99  | -2.64  |
| Q8ZN75 DAPE_SALTY Succinyl-diaminopimelate desuccinylase                                 | 13 | Oxidation+M(8)                              | IGFTIEHMDFGDTQNFVAWR                 | 35  | 20 | 4  | 19.58 | b6b8y5y8                             | 2487.08 | 101.374 | 12959 | 3 | 829.70  | -14.43 |
| P53636 SODC1_SALTY Superoxide dismutase [Cu-Zn] 1                                        | 1  | Carbamidomethyl+C(3)                        | FACGVIEK                             | 169 | 8  | 9  | 66.98 | y1y2°y2y3y4y5y6y7y8                  | 923.46  | 40.759  | 98462 | 2 | 462.23  | -7.20  |
| P53636 SODC1_SALTY Superoxide dismutase [Cu-Zn] 1                                        | 2  |                                             | GGDNYSDKPAPLGGGGAR                   | 151 | 18 | 10 | 40.48 | b2b5*b5b10y7y8y10y13°y13y18          | 1688.78 | 32.694  | 71735 | 3 | 563.60  | -10.70 |
| P53636 SODC1_SALTY Superoxide dismutase [Cu-Zn] 1                                        | 3  |                                             | EV PALMAGGHLDPEK                     | 84  | 15 | 5  | 25.58 | b6b13y10°y10y13                      | 1563.80 | 57.038  | 9498  | 2 | 782.40  | 11.94  |
| P53636 SODC1_SALTY Superoxide dismutase [Cu-Zn] 1                                        | 4  | Carbamidomethyl+C(21)                       | GGDNYSDKPAPLGGGGARFACGVIEK           | 151 | 26 | 3  | 12.06 | b17y7y14                             | 2593.24 | 75.760  | 4255  | 4 | 649.07  | -1.13  |
| P53636 SODC1_SALTY Superoxide dismutase [Cu-Zn] 1                                        | 5  |                                             | GHSLMIHKGGDNYSDKPAPLGGGAR            | 143 | 26 | 4  | 15.65 | b11b13y4y15                          | 2592.25 | 81.006  | 2988  | 3 | 864.76  | -8.29  |
| P53636 SODC1_SALTY Superoxide dismutase [Cu-Zn] 1                                        | 6  | Oxidation+M(9)                              | DGKEVPALMAGGHLDPEK                   | 81  | 18 | 3  | 15.45 | b11y7y9                              | 1879.94 | 72.612  | 55540 | 3 | 627.32  | 7.99   |
| P53636 SODC1_SALTY Superoxide dismutase [Cu-Zn] 1                                        | 7  | Oxidation+M(6)                              | EV PALMAGGHLDPEK                     | 84  | 15 | 5  | 36.81 | b6b12y4y8y13                         | 1579.78 | 110.006 | 1810  | 2 | 790.40  | 2.78   |
| Q9L6N1 METE_SALTY 5-methyltetrahydropteroyltri glutamate--homocysteine methyltransferase | 1  | Carbamidomethyl+C(7)                        | LWVNPDCLK                            | 719 | 10 | 5  | 41.5  | y4y6°y6y8y10                         | 1201.61 | 60.335  | 51152 | 2 | 601.31  | 4.47   |
| Q9L6N1 METE_SALTY 5-methyltetrahydropteroyltri glutamate--homocysteine methyltransferase | 2  |                                             | QAGIDLLPVGDFAWYDHVLT TSL LLGNV PAR   | 52  | 31 | 11 | 44.08 | b5*b5b6*b6y3y6*y6y7y13y24y31         | 3351.78 | 119.216 | 34842 | 3 | 1117.93 | 2.77   |
| Q9L6N1 METE_SALTY 5-methyltetrahydropteroyltri glutamate--homocysteine methyltransferase | 3  |                                             | LA AITAQDSQRENPYEVR                  | 395 | 18 | 8  | 49.88 | b2b3b4y1y2y13y14y15                  | 2061.03 | 46.993  | 31038 | 3 | 687.68  | -4.86  |
| Q9L6N1 METE_SALTY 5-methyltetrahydropteroyltri glutamate--homocysteine methyltransferase | 4  |                                             | LPVDWLLSAGLINGR                      | 279 | 15 | 5  | 24.01 | b4b5°b5y12y15                        | 1623.92 | 101.237 | 12930 | 2 | 812.46  | -3.91  |

|                                                                                         |    |                       |                                   |     |    |    |       |                               |         |         |       |   |         |        |
|-----------------------------------------------------------------------------------------|----|-----------------------|-----------------------------------|-----|----|----|-------|-------------------------------|---------|---------|-------|---|---------|--------|
| Q9L6N1 METE_SALTY 5-methyltetrahydropteroyltriglutamate--homocysteine methyltransferase | 5  |                       | LAAITAQDSQR                       | 395 | 11 | 7  | 36.49 | b2b3y2*y2y3y4y7               | 1173.62 | 33.342  | 11663 | 2 | 587.32  | 2.29   |
| Q9L6N1 METE_SALTY 5-methyltetrahydropteroyltriglutamate--homocysteine methyltransferase | 6  |                       | SDWDAYLEWGVEAFR                   | 611 | 15 | 5  | 17.99 | b1b12y6y8°y8                  | 1843.82 | 113.945 | 4960  | 3 | 615.28  | -2.12  |
| Q9L6N1 METE_SALTY 5-methyltetrahydropteroyltriglutamate--homocysteine methyltransferase | 7  |                       | DALNSGETAALEEWSAPIQAR             | 360 | 21 | 5  | 13.77 | b14y3*y3y12°y12               | 2229.05 | 88.204  | 3810  | 2 | 1115.03 | -13.36 |
| Q9L6N1 METE_SALTY 5-methyltetrahydropteroyltriglutamate--homocysteine methyltransferase | 8  | Carbamidomethyl+C(11) | GMLTGPVTILCWSFPR                  | 549 | 16 | 3  | 23.55 | b5b6y12                       | 1834.94 | 98.963  | 38501 | 2 | 917.97  | 4.46   |
| Q9L6N1 METE_SALTY 5-methyltetrahydropteroyltriglutamate--homocysteine methyltransferase | 9  |                       | WFNTNYHYIVPEFSK                   | 117 | 15 | 4  | 17.99 | b9y4°y4y6                     | 1944.90 | 51.687  | 21282 | 2 | 972.95  | -15.00 |
| Q9L6N1 METE_SALTY 5-methyltetrahydropteroyltriglutamate--homocysteine methyltransferase | 10 |                       | LPAPWPTTTIGSFQTTEIR               | 422 | 19 | 3  | 23.99 | y10y11y13                     | 2116.08 | 77.882  | 6193  | 3 | 706.03  | -13.15 |
| Q9L6N1 METE_SALTY 5-methyltetrahydropteroyltriglutamate--homocysteine methyltransferase | 11 |                       | GEPFDR                            | 174 | 6  | 2  | 26.71 | y4y5                          | 720.34  | 54.827  | 3377  | 1 | 720.34  | 7.71   |
| Q9L6N1 METE_SALTY 5-methyltetrahydropteroyltriglutamate--homocysteine methyltransferase | 12 |                       | NDMVEYFGEHLDDGFVFTQNGWV<br>QSYGSR | 487 | 28 | 7  | 34.54 | y3y5°y5y10y12*y12y14          | 3282.52 | 94.256  | 2611  | 3 | 1094.85 | 19.26  |
| Q9L6N1 METE_SALTY 5-methyltetrahydropteroyltriglutamate--homocysteine methyltransferase | 13 |                       | RSDWDAYLEWGVEAFR                  | 610 | 16 | 3  | 17.02 | b3y6y11                       | 1999.96 | 101.322 | 81249 | 3 | 667.32  | 13.12  |
| Q9L6N1 METE_SALTY 5-methyltetrahydropteroyltriglutamate--homocysteine methyltransferase | 14 |                       | FKLPAPWPTTTIGSFQTTEIR             | 420 | 21 | 4  | 13.77 | b14y7*y7y9                    | 2391.26 | 88.445  | 40006 | 3 | 797.76  | -4.29  |
| Q9L6N1 METE_SALTY 5-methyltetrahydropteroyltriglutamate--homocysteine methyltransferase | 15 |                       | LPAPWPTTTIGSFQTTEIRGLR            | 422 | 22 | 6  | 48.96 | b3b4b5b6°b6y21                | 2442.29 | 136.263 | 8959  | 3 | 814.77  | -8.20  |
| Q9L6N1 METE_SALTY 5-methyltetrahydropteroyltriglutamate--homocysteine methyltransferase | 16 |                       | TRGWPETR                          | 729 | 8  | 3  | 32.9  | b4b5y6                        | 1002.50 | 110.688 | 2877  | 1 | 1002.50 | -11.20 |
| Q9L6N1 METE_SALTY 5-methyltetrahydropteroyltriglutamate--homocysteine methyltransferase | 17 |                       | LAAITAQDSQRENPYEVR                | 395 | 18 | 4  | 22.86 | b13°b13y9y10                  | 2061.01 | 62.926  | 2180  | 2 | 1031.01 | -10.66 |
| Q9L6N1 METE_SALTY 5-methyltetrahydropteroyltriglutamate--homocysteine methyltransferase | 18 | Oxidation+M(12)       | APTGEPA AAAEMTK                   | 103 | 14 | 3  | 24.57 | b9y3y4                        | 1360.65 | 57.508  | 13739 | 2 | 680.83  | 7.00   |
| Q9L6N1 METE_SALTY 5-methyltetrahydropteroyltriglutamate--homocysteine methyltransferase | 19 |                       | SQRENPYEVR                        | 403 | 10 | 1  | 7.35  | b9                            | 1277.62 | 47.075  | 2275  | 2 | 639.31  | -6.40  |
| P66955 TALB_SALTY Transaldolase B                                                       | 1  |                       | LSYDTEASIAK                       | 100 | 11 | 4  | 35.89 | y8y9y10y11                    | 1197.60 | 43.827  | 17034 | 2 | 599.30  | -0.10  |
| P66955 TALB_SALTY Transaldolase B                                                       | 2  |                       | ELAESEGAIER                       | 250 | 11 | 5  | 35.89 | y7y8y9°y9y11                  | 1203.59 | 35.906  | 15858 | 2 | 602.30  | 7.00   |
| P66955 TALB_SALTY Transaldolase B                                                       | 3  | Carbamidomethyl+C(11) | NVGEILELAGCDR                     | 228 | 13 | 3  | 20.48 | b12y4y8                       | 1445.71 | 73.616  | 13059 | 2 | 723.36  | 3.88   |
| P66955 TALB_SALTY Transaldolase B                                                       | 4  |                       | LYNDAGISNDR                       | 117 | 11 | 3  | 24.13 | b7y4y7                        | 1237.59 | 35.415  | 17312 | 2 | 619.30  | 6.12   |
| P66955 TALB_SALTY Transaldolase B                                                       | 5  |                       | MIGDLL                            | 311 | 6  | 1  | 13.56 | b4                            | 661.36  | 17.539  | 1778  | 2 | 331.18  | 2.03   |
| P66955 TALB_SALTY Transaldolase B                                                       | 6  |                       | LIDDAVAWAKQSSDR                   | 50  | 16 | 4  | 28.13 | b4y3y4y9                      | 1802.91 | 53.862  | 2078  | 3 | 601.64  | 1.83   |
| P05989 ILVC_SALTY Ketol-acid reductoisomerase                                           | 1  |                       | GFGVPTLIAPHENDPQGEGMAIA<br>K      | 167 | 25 | 10 | 52.15 | b2b3b4b13y3y8y12y14y21<br>y25 | 2548.28 | 76.738  | 51403 | 3 | 850.10  | -0.67  |

|                                               |    |                                                      |                                        |     |    |    |       |                                   |         |         |       |   |         |        |
|-----------------------------------------------|----|------------------------------------------------------|----------------------------------------|-----|----|----|-------|-----------------------------------|---------|---------|-------|---|---------|--------|
| P05989 ILVC_SALTY Ketol-acid reductoisomerase | 2  |                                                      | LIQFGWETITEALK                         | 252 | 14 | 4  | 19.13 | b2b6y3y11                         | 1648.88 | 101.237 | 22286 | 2 | 824.95  | -5.92  |
| P05989 ILVC_SALTY Ketol-acid reductoisomerase | 3  |                                                      | TAFETAPQYEGK                           | 336 | 12 | 4  | 22.11 | b3y5y7y12                         | 1341.64 | 41.123  | 19307 | 2 | 671.32  | 3.73   |
| P05989 ILVC_SALTY Ketol-acid reductoisomerase | 4  | Carbamidomethyl+C(6)                                 | VVIVGCGAQGLNQLNMR                      | 39  | 18 | 5  | 24.62 | b12y3*y3y5y12                     | 1885.98 | 63.864  | 5299  | 2 | 943.49  | 1.42   |
| P05989 ILVC_SALTY Ketol-acid reductoisomerase | 5  |                                                      | LVAEGTDPAYAEK                          | 239 | 13 | 3  | 20.48 | b11y5y11                          | 1363.67 | 37.206  | 5169  | 2 | 682.34  | -1.61  |
| P05989 ILVC_SALTY Ketol-acid reductoisomerase | 6  |                                                      | ANYFNTLNLR                             | 1   | 10 | 3  | 28.49 | b5y6y7                            | 1225.63 | 67.640  | 23724 | 2 | 613.32  | -4.58  |
| P05989 ILVC_SALTY Ketol-acid reductoisomerase | 7  |                                                      | DITVVMVAPK                             | 145 | 10 | 3  | 26.73 | b3b8y6                            | 1072.63 | 60.393  | 8361  | 2 | 536.82  | 21.28  |
| P05989 ILVC_SALTY Ketol-acid reductoisomerase | 8  |                                                      | LLTWR                                  | 326 | 5  | 1  | 13.15 | y4                                | 688.42  | 54.311  | 3383  | 2 | 344.71  | 9.66   |
| P05989 ILVC_SALTY Ketol-acid reductoisomerase | 9  |                                                      | DEFADGASYLQGK                          | 25  | 13 | 3  | 20.48 | b3y7y10                           | 1400.66 | 44.743  | 2072  | 2 | 700.83  | 19.87  |
| P05989 ILVC_SALTY Ketol-acid reductoisomerase | 10 |                                                      | AWAAATGGHR                             | 192 | 10 | 3  | 26.73 | b6y3y5                            | 997.48  | 111.178 | 1994  | 1 | 997.48  | -17.44 |
| P05989 ILVC_SALTY Ketol-acid reductoisomerase | 11 |                                                      | DGAALGYSHGFNIVEVGEQIR                  | 123 | 21 | 10 | 44.37 | b5b8b9b12°b12y7°y7*y7y8°y8        | 2232.14 | 136.276 | 1786  | 3 | 744.72  | 16.95  |
| P05989 ILVC_SALTY Ketol-acid reductoisomerase | 12 |                                                      | VGTYEELIPQADLVVNLTDPDKQHS DVVR         | 88  | 28 | 4  | 17.19 | b8y6y14y20                        | 3135.61 | 81.254  | 32389 | 4 | 784.66  | -7.01  |
| P05989 ILVC_SALTY Ketol-acid reductoisomerase | 13 | Carbamidomethyl+C(11)                                | DITVVMVAPKCPGTEVR                      | 145 | 17 | 9  | 57.32 | b12b14y3y6°y6y7y8°y8y11           | 1871.97 | 57.392  | 18667 | 2 | 936.49  | -0.91  |
| P05989 ILVC_SALTY Ketol-acid reductoisomerase | 14 | Carbamidomethyl+C(11)<br>;Carbamidomethyl+C(21)<br>) | SDLMGEQTILCGMLQAGSLLCFD KLVAEGTDPAYAEK | 215 | 37 | 6  | 37.44 | b3b12y6°y6y7y8                    | 4031.91 | 117.634 | 16330 | 3 | 1344.64 | -0.97  |
| P05989 ILVC_SALTY Ketol-acid reductoisomerase | 15 |                                                      | TAFETAPQYEGKIGEYFDK                    | 336 | 21 | 6  | 29.51 | b5b6b9y3y10°y10                   | 2451.11 | 80.087  | 3147  | 3 | 817.71  | -11.55 |
| P05989 ILVC_SALTY Ketol-acid reductoisomerase | 16 |                                                      | EETGKTAFETAPQYEGK                      | 331 | 17 | 5  | 25.94 | b5°b5b8b14y11                     | 1885.86 | 72.636  | 2427  | 3 | 629.29  | -13.27 |
| P05989 ILVC_SALTY Ketol-acid reductoisomerase | 17 | Oxidation+M(6)                                       | SVQPLMKDGAALGYSHGFNIVEV GEQIR          | 116 | 28 | 12 | 65.61 | b3°b3b5b8°b8*b8b9b11°b11b14b18b24 | 3031.53 | 136.250 | 6432  | 3 | 1011.18 | 0.64   |
| P05989 ILVC_SALTY Ketol-acid reductoisomerase | 18 | Oxidation+M(21)                                      | GFGVPTLIAVHPENDPQGEGMAIA K             | 167 | 25 | 4  | 12.32 | b6y10°y10y15                      | 2564.28 | 99.415  | 2322  | 3 | 855.43  | -0.19  |
