# Supplementary material for: Phenotypic profile linked to inhibition of the major Zn influx system in Salmonella enterica : proteomics and ionomics investigations
Source: Royal Society of Chemistry journal article supplement (doi:10.1039/c0mb00140f), 2010-10-20
Supplement: c0mb00140f.zip [file c0mb00140f.zip]

SA123 + Zn(II) LC-MS run 3: 123\_Zn\_220709\_1a2\_03

| Protein name                                    | Peptide Rank | Peptide Modification                  | Peptide Sequence              | Peptide sequence start | Peptide sequence Length | Peptide Matched Products | Peptide Score | By Matches                                                                                                                                    | Precursor MH+ (Da) | Retention time (min) | Intensity | z | Precursor m/z | MH+ Error (ppm) |
|-------------------------------------------------|--------------|---------------------------------------|-------------------------------|------------------------|-------------------------|--------------------------|---------------|-----------------------------------------------------------------------------------------------------------------------------------------------|--------------------|----------------------|-----------|---|---------------|-----------------|
| [P0A1S2]HNS_SALTY DNA-binding protein H-NS      | 1            |                                       | EMLIADGIDPNELLNSMAAAK         | 62                     | 21                      | 50                       | 373.87        | b2°b2b3°b3b4°b4b5°b5b6°b6b7°b7b8°b8b9b10b12b13°b13b14°b14b15b17b21y1y2y3y4y6y7°y7°y7y8y9y10y11y12°y12*y12y13°y13y14y15y16°y16y17*y17y18y19y21 | 2216.10            | 97.000               | 488246    | 2 | 1108.55       | 1.54            |
| [P0A1S2]HNS_SALTY DNA-binding protein H-NS      | 2            |                                       | YSYVDENGETK                   | 96                     | 11                      | 11                       | 86.67         | b3°b3y2y5y6y7y8y9y10°y10y11                                                                                                                   | 1304.56            | 32.693               | 108295    | 2 | 652.78        | -2.99           |
| [P0A1S2]HNS_SALTY DNA-binding protein H-NS      | 3            | Carbamidomethyl+C(2)                  | ECTLETLEEMLEK                 | 19                     | 13                      | 4                        | 20.46         | b7y5y11y13                                                                                                                                    | 1624.75            | 93.187               | 49430     | 2 | 812.88        | 6.09            |
| [P0A1S2]HNS_SALTY DNA-binding protein H-NS      | 4            |                                       | TPAVIKK                       | 114                    | 7                       | 4                        | 50.38         | b4y3y4y6                                                                                                                                      | 756.49             | 19.220               | 13174     | 2 | 378.75        | -13.72          |
| [P0A1S2]HNS_SALTY DNA-binding protein H-NS      | 5            |                                       | TPAVIK                        | 114                    | 6                       | 1                        | 13.55         | y5                                                                                                                                            | 628.40             | 27.031               | 4296      | 2 | 314.70        | -4.37           |
| [P0A1S2]HNS_SALTY DNA-binding protein H-NS      | 6            |                                       | YSYVDENGETKTWTGQGR            | 96                     | 18                      | 13                       | 124.96        | b3°b3y4y5y8y11y12*y12y13y14y15y16y17                                                                                                          | 2090.93            | 46.878               | 213528    | 3 | 697.65        | -6.54           |
| [P0A1S2]HNS_SALTY DNA-binding protein H-NS      | 7            |                                       | TPAVIKK                       | 114                    | 7                       | 3                        | 37.24         | b4y5y6                                                                                                                                        | 756.50             | 20.054               | 3120      | 1 | 756.50        | 6.21            |
| [P0A1S2]HNS_SALTY DNA-binding protein H-NS      | 8            | Oxidation+M()                         | EMLIADGIDPNELLNSMAAAK         | 62                     | 21                      | 4                        | 22.21         | b7°b7y14y15                                                                                                                                   | 2232.11            | 91.388               | 21181     | 2 | 1116.56       | 8.31            |
| [P0A1S2]HNS_SALTY DNA-binding protein H-NS      | 9            | Oxidation+M(22)                       | LQQYREMLIADGIDPNELLNSMAAAK    | 57                     | 26                      | 7                        | 30.81         | b3°b3b13y6y11y12y14                                                                                                                           | 2920.49            | 105.797              | 6144      | 3 | 974.17        | 11.37           |
| [P0A1S2]HNS_SALTY DNA-binding protein H-NS      | 10           | Carbamidomethyl+C(6); Oxidation+M(14) | AQARECTLETLEEMLEK             | 15                     | 17                      | 10                       | 54.8          | b3b4°b4b5°b5°b5b8y7°y7y8                                                                                                                      | 2067.00            | 136.283              | 2467      | 2 | 1034.00       | 12.28           |
| [P0A1D5]CH10_SALTY 10 kDa chaperonin            | 1            |                                       | VGDIVIFNDGYGVK                | 60                     | 14                      | 22                       | 213.96        | b3b4b5°b5b6b8b11b13°b13y1y2y3y4y5y6y7°y7y8y9y10y11y14                                                                                         | 1495.78            | 73.397               | 264675    | 2 | 748.39        | 0.82            |
| [P0A1D5]CH10_SALTY 10 kDa chaperonin            | 2            |                                       | ILDNGTVQPLDVK                 | 47                     | 13                      | 30                       | 200.41        | b2b3b4°b4b6°b6°b6b7°b7b8°b8°b8b9b11°b11b13y1y2y3y5°y5y7y8y9y10y11°y11*y11y12y13                                                               | 1411.78            | 57.075               | 258523    | 2 | 706.39        | -0.69           |
| [P0A1D5]CH10_SALTY 10 kDa chaperonin            | 3            |                                       | SAGGIVLTGSAAGK                | 20                     | 14                      | 21                       | 139.8         | b2°b2b4°b4b5°b5b6°b6b14y1y2y3y4y6y7y8°y8y9y11y12y14                                                                                           | 1188.65            | 43.544               | 186754    | 2 | 594.83        | -3.08           |
| [P0A1D5]CH10_SALTY 10 kDa chaperonin            | 4            |                                       | GEIIVGK                       | 37                     | 8                       | 7                        | 53.8          | b2y2y3y4y5y6y8                                                                                                                                | 786.46             | 41.530               | 20400     | 2 | 393.74        | -9.00           |
| [P0A1D5]CH10_SALTY 10 kDa chaperonin            | 5            |                                       | IDNEEVLIMSESDILAIVEA          | 77                     | 20                      | 5                        | 25.04         | b12°b12y3y12y13                                                                                                                               | 2203.13            | 83.847               | 2130      | 3 | 735.05        | 11.64           |
| [P0A1D5]CH10_SALTY 10 kDa chaperonin            | 6            |                                       | VGDIVIFNDGYGVKSEK             | 60                     | 17                      | 3                        | 23.57         | y10y12y14                                                                                                                                     | 1839.95            | 92.244               | 12156     | 2 | 920.48        | 1.53            |
| [P0A1D5]CH10_SALTY 10 kDa chaperonin            | 7            |                                       | SAGGIVLTGSAAGK                | 20                     | 14                      | 0                        | 3.7           |                                                                                                                                               | 1170.64            | 43.576               | 46853     | 2 | 585.82        | -2.09           |
| [P0A1R6]DBHA_SALTY DNA-binding protein HU-alpha | 1            |                                       | IAAANVPAFVSGK                 | 70                     | 13                      | 27                       | 189.62        | b2b3b4b5°b5b6°b6b8y1y2y3y4°y4y5y6y7°y7y8y9y10*y10y11°y11*y11y12y13*y13                                                                        | 1244.70            | 59.264               | 702918    | 2 | 622.85        | -0.29           |
| [P0A1R6]DBHA_SALTY DNA-binding protein HU-alpha | 2            |                                       | AALESTLAAITESLKEGDAVQLVGFGTFK | 22                     | 29                      | 7                        | 24.79         | b4b5°b5y1y3y7°y7                                                                                                                              | 2966.55            | 136.167              | 6949      | 3 | 989.52        | -7.74           |
| [P0A1R6]DBHA_SALTY DNA-binding protein HU-alpha | 3            |                                       | NPQTGKEIK                     | 61                     | 9                       | 6                        | 30.28         | b3y2y3°y3y5y9                                                                                                                                 | 1014.55            | 14.821               | 6202      | 2 | 507.78        | -8.24           |

|                                           |    |                       |                                     |     |    |    |        |                                                                                                                                   |         |         |        |   |         |        |
|-------------------------------------------|----|-----------------------|-------------------------------------|-----|----|----|--------|-----------------------------------------------------------------------------------------------------------------------------------|---------|---------|--------|---|---------|--------|
| P0A1H5 EFTU_SALTY Elongation factor<br>Tu | 1  |                       | ELLSQYDFPGDDTPIVR                   | 155 | 17 | 29 | 231.4  | b2°b2b3°b3b5b6°b6°b6b7b15b16y1y3y4y5y6y7y8y9°y9y10°y10y11°y11y12y13y14y15y17                                                      | 1964.97 | 76.672  | 479097 | 2 | 982.99  | 7.58   |
| P0A1H5 EFTU_SALTY Elongation factor<br>Tu | 2  |                       | AIDKPFLLPIDVFSISGR                  | 205 | 19 | 8  | 53.05  | b7b8y1y3y5y6y7y19                                                                                                                 | 2117.15 | 106.678 | 382737 | 3 | 706.39  | -7.96  |
| P0A1H5 EFTU_SALTY Elongation factor<br>Tu | 3  |                       | IIELAGFLDSYIPEPER                   | 188 | 17 | 26 | 221.26 | b1b2b3b4b6b7b12°b12b14y1y2y3y4y5°y5y6y7y8°y8y10y11y12y13y14y15y17                                                                 | 1962.02 | 102.328 | 330949 | 2 | 981.52  | 1.12   |
| P0A1H5 EFTU_SALTY Elongation factor<br>Tu | 4  |                       | TTLTAAITTVLAK                       | 25  | 13 | 9  | 74.36  | b1b2y2y4y6y7y8y9y10                                                                                                               | 1303.78 | 84.931  | 317728 | 2 | 652.39  | -1.12  |
| P0A1H5 EFTU_SALTY Elongation factor<br>Tu | 5  |                       | AGENVGVLLR                          | 270 | 10 | 13 | 88.02  | b2b4b5°b5°b5y1y2y3y4y5y6y7y10                                                                                                     | 1027.58 | 56.219  | 309457 | 2 | 514.29  | -8.91  |
| P0A1H5 EFTU_SALTY Elongation factor<br>Tu | 6  |                       | GITINTSHVEYDTPTR                    | 59  | 16 | 27 | 192.53 | b2b3°b3b8b9b12y1y3y4°y4y5y6y7°y7y8°y8y9y10°y10y11°y11y12°y12°y12y13y14y16                                                         | 1803.87 | 49.460  | 285681 | 3 | 601.96  | -11.71 |
| P0A1H5 EFTU_SALTY Elongation factor<br>Tu | 7  |                       | TTDVTGTIELPEGVEMVMPGDNI<br>K        | 334 | 24 | 45 | 267.01 | b2°b2b3°b3b4b7°b7b9°b9b10°b10b12b14°b14b16°b16b18°b18y3y4°y4°y4y5°y5y6°y6°y6y7°y7°y7y8y9°y9°y9y10y12y13°y13y14°y14y15y16y17y20y24 | 2546.25 | 86.631  | 237265 | 2 | 1273.63 | 3.45   |
| P0A1H5 EFTU_SALTY Elongation factor<br>Tu | 8  |                       | QVGVPYIIVFLNK                       | 124 | 13 | 9  | 66.7   | b3b4°b4b13y4y6y9y11y13                                                                                                            | 1489.88 | 99.505  | 231582 | 2 | 745.44  | -0.90  |
| P0A1H5 EFTU_SALTY Elongation factor<br>Tu | 9  |                       | ALEGDAEWEAK                         | 177 | 11 | 7  | 52.61  | b2b4y4y7y8y9°y9                                                                                                                   | 1218.56 | 46.160  | 175693 | 2 | 609.78  | -1.20  |
| P0A1H5 EFTU_SALTY Elongation factor<br>Tu | 10 |                       | TVGAGVVAK                           | 382 | 9  | 9  | 45.18  | b2°b2b7y1y2y3y7y8y9                                                                                                               | 801.47  | 28.318  | 161576 | 2 | 401.24  | -14.09 |
| P0A1H5 EFTU_SALTY Elongation factor<br>Tu | 11 | Carbamidomethyl+C(3)  | STCTGVEMFR                          | 253 | 10 | 10 | 67.76  | b2°b2y2y3y4y6y7y8°y8y10                                                                                                           | 1187.52 | 52.747  | 116578 | 2 | 594.26  | 0.51   |
| P0A1H5 EFTU_SALTY Elongation factor<br>Tu | 12 | Carbamidomethyl+C(1)  | CDMVDDEELLELEVEMEVR                 | 137 | 18 | 13 | 89.19  | b2b3b13y1y2y3y4y5°y5y6y7y8y14                                                                                                     | 2224.00 | 106.565 | 52532  | 2 | 1112.50 | 8.34   |
| P0A1H5 EFTU_SALTY Elongation factor<br>Tu | 13 |                       | VGEEVEIVGIK                         | 238 | 11 | 5  | 50.26  | b4b7b8b10y11                                                                                                                      | 1171.67 | 44.926  | 8611   | 2 | 586.34  | 7.50   |
| P0A1H5 EFTU_SALTY Elongation factor<br>Tu | 14 |                       | MVVTLIHPIAMDDGLR                    | 358 | 16 | 24 | 216.16 | b3b4°b4b5°b5b6b14b15y3y4°y4y5°y5y6y7y8y9°y9y10°y10y11y13y15°y15                                                                   | 1780.92 | 79.501  | 820769 | 3 | 594.31  | -15.42 |
| P0A1H5 EFTU_SALTY Elongation factor<br>Tu | 15 |                       | TKPHVNVGTIGHVDHGK                   | 8   | 17 | 5  | 16.17  | b3y6°y6y9°y9                                                                                                                      | 1795.93 | 90.125  | 85488  | 3 | 599.31  | -16.11 |
| P0A1H5 EFTU_SALTY Elongation factor<br>Tu | 16 |                       | LLDEGR                              | 264 | 6  | 1  | 13.55  | y4                                                                                                                                | 702.38  | 23.063  | 5835   | 1 | 702.38  | 5.04   |
| P0A1H5 EFTU_SALTY Elongation factor<br>Tu | 17 |                       | HTPFFK                              | 319 | 6  | 1  | 13.55  | y4                                                                                                                                | 776.41  | 53.206  | 3965   | 2 | 388.71  | -2.59  |
| P0A1H5 EFTU_SALTY Elongation factor<br>Tu | 18 | Carbamidomethyl+C(14) | QVGVPYIIVFLNKCDMVDDEELLE<br>LVEMEVR | 124 | 31 | 13 | 106.29 | b3b4°b4b5b6y4y5y6y7y8°y8y14y27                                                                                                    | 3694.85 | 128.025 | 46738  | 3 | 1232.29 | 2.38   |
| P0A1H5 EFTU_SALTY Elongation factor<br>Tu | 19 |                       | TYGGAARAFDQIDNAPEEK                 | 38  | 19 | 5  | 28.26  | b10°b10b11y4y15                                                                                                                   | 2052.99 | 74.499  | 6122   | 2 | 1027.00 | 13.68  |
| P0A1H5 EFTU_SALTY Elongation factor<br>Tu | 20 | Oxidation+M(23)       | NMITGAAQMDGAILVVAATDGP<br>MPQTR     | 90  | 27 | 4  | 21.83  | b14b15y15°y15                                                                                                                     | 2745.33 | 136.659 | 15026  | 2 | 1373.17 | -0.98  |
| P0A1H5 EFTU_SALTY Elongation factor<br>Tu | 21 | Oxidation+M()         | TTDVTGTIELPEGVEMVMPGDNI<br>K        | 334 | 24 | 5  | 23.25  | b6b8°b8b9y4                                                                                                                       | 2562.26 | 105.958 | 1825   | 3 | 854.76  | 12.48  |
| P0A1H5 EFTU_SALTY Elongation factor<br>Tu | 22 |                       | GAGVVAK                             | 384 | 7  | 4  | 54.21  | b3b4b5b6                                                                                                                          | 601.37  | 28.323  | 83818  | 1 | 601.37  | -2.74  |

|                                                           |    |                       |                                    |     |    |    |        |                                                                                  |         |         |        |   |         |        |
|-----------------------------------------------------------|----|-----------------------|------------------------------------|-----|----|----|--------|----------------------------------------------------------------------------------|---------|---------|--------|---|---------|--------|
| P0A1H5 EFTU_SALTY Elongation factor Tu                    | 23 |                       | TINTSHVEYDTPTR                     | 61  | 14 | 3  | 14.28  | b4°b4b10                                                                         | 1633.79 | 49.454  | 13834  | 2 | 817.40  | 5.16   |
| P0A1H5 EFTU_SALTY Elongation factor Tu                    | 24 |                       | TTDVTGTIELPEGVEM                   | 334 | 16 | 2  | 12.25  | y4y13                                                                            | 1691.78 | 86.661  | 3532   | 3 | 564.60  | -12.70 |
| P0A1H5 EFTU_SALTY Elongation factor Tu                    | 25 |                       | LEGDAEWEAK                         | 178 | 10 | 0  | 2.47   |                                                                                  | 1147.53 | 46.043  | 2389   | 2 | 574.27  | -0.74  |
| P0A1H5 EFTU_SALTY Elongation factor Tu                    | 26 |                       | GITINTSHVEYDTPT                    | 59  | 15 | 0  | 4.53   |                                                                                  | 1647.79 | 49.450  | 1676   | 2 | 824.40  | 3.85   |
| P0A1H5 EFTU_SALTY Elongation factor Tu                    | 27 |                       | GITINTSHVEYDTPTR                   | 59  | 16 | 0  | 4.53   |                                                                                  | 1785.87 | 49.471  | 21792  | 3 | 595.96  | -2.32  |
| P64076 ENO_SALTY Enolase                                  | 1  |                       | FNQIGSLTETLAAIK                    | 342 | 15 | 20 | 171.86 | b2°b2b3°b3b4b5b14y2y3y4y6y7y8y9y10y11°y11y12y13y15                               | 1605.88 | 85.871  | 341815 | 2 | 803.45  | -0.68  |
| P64076 ENO_SALTY Enolase                                  | 2  |                       | SGETEDATIADLAVGTAAGQIK             | 371 | 22 | 30 | 251.29 | b2b3b9°b9b10b11b12b13°b13b14b16b18b22y2y3y4*y4y5y6y7*y7y8y9y10y12y13y14y15y17y22 | 2118.06 | 75.106  | 235375 | 2 | 1059.54 | 3.11   |
| P64076 ENO_SALTY Enolase                                  | 3  |                       | YSMPVPMMNINGGEHADNNVDI QEFMIQPVGAK | 143 | 34 | 19 | 104.19 | b2b4b5°b5b23y3y5y6*y6y8y10y11y12y13y16y29*y29y31y34                              | 3759.77 | 98.792  | 171484 | 3 | 1253.93 | 1.30   |
| P64076 ENO_SALTY Enolase                                  | 4  |                       | GMNTAVGDEGGYAPNLGSNAEA LAVIAEAVK   | 200 | 31 | 30 | 215.04 | b2b3b4b5°b5b6°b6°b6b12b13b16°b16b27y1y2y3y4y5y6y7y8y10y11y14y15y18y19y25y26y31   | 2989.46 | 95.028  | 140212 | 3 | 997.16  | 2.12   |
| P64076 ENO_SALTY Enolase                                  | 5  |                       | AVGAVNGPIAQAILGK                   | 66  | 16 | 10 | 75.34  | b2b3b5y3y5y10y11y12y14y16                                                        | 1478.87 | 75.011  | 138654 | 2 | 739.94  | 1.16   |
| P64076 ENO_SALTY Enolase                                  | 6  |                       | DAGYTAVISHR                        | 360 | 11 | 13 | 97.6   | b2b4°b4b7y2y3y4y5y6y7y9°y9y11                                                    | 1189.59 | 41.417  | 122840 | 2 | 595.30  | -3.59  |
| P64076 ENO_SALTY Enolase                                  | 7  |                       | GMPLYEHIAELNGTPGK                  | 126 | 17 | 3  | 23.57  | y3y11y13                                                                         | 1826.90 | 67.508  | 105473 | 3 | 609.64  | -5.28  |
| P64076 ENO_SALTY Enolase                                  | 8  |                       | IQLVGDDLFTNTNK                     | 311 | 14 | 20 | 117.63 | b2°b2b3b10y1y2y4*y4y5°y5y6*y6y8y9y10y11°y11y12y14*y14                            | 1562.85 | 77.530  | 72986  | 2 | 781.93  | 3.98   |
| P64076 ENO_SALTY Enolase                                  | 9  |                       | IEEALGEK                           | 411 | 8  | 8  | 24.51  | b2y2°y2y6°y6y7°y7y8                                                              | 888.46  | 31.071  | 40755  | 2 | 444.73  | -11.47 |
| P64076 ENO_SALTY Enolase                                  | 10 |                       | QYPIVSIEDGLDESDWDGFAYQTK           | 282 | 24 | 7  | 12.61  | b2b3b24y2y6y8y24                                                                 | 2776.28 | 93.762  | 36621  | 2 | 1388.64 | 4.66   |
| P64076 ENO_SALTY Enolase                                  | 11 | Carbamidomethyl+C(16) | AAGYELGKDITLAMDCAASEFYK DGK        | 231 | 26 | 7  | 34.56  | b3b6°b6b7b11b16b26                                                               | 2824.33 | 103.773 | 18172  | 3 | 942.11  | 3.89   |
| P64076 ENO_SALTY Enolase                                  | 12 |                       | YVLAGEGNK                          | 257 | 9  | 5  | 30.28  | b3y3y7°y7*y7                                                                     | 950.51  | 33.293  | 122270 | 2 | 475.76  | 19.59  |
| P64076 ENO_SALTY Enolase                                  | 13 |                       | GIANSILIK                          | 333 | 9  | 3  | 38.06  | y3y6y7                                                                           | 928.57  | 60.893  | 111108 | 2 | 464.79  | -11.96 |
| P64076 ENO_SALTY Enolase                                  | 14 |                       | EIIDSR                             | 10  | 6  | 2  | 26.69  | y4y5                                                                             | 732.40  | 26.247  | 32206  | 1 | 732.40  | 14.50  |
| P64076 ENO_SALTY Enolase                                  | 15 |                       | GNPTVEAEVHLEGGFVGMAAAPS GASTGSR    | 16  | 30 | 3  | 17.23  | y4y8y18                                                                          | 2856.37 | 92.099  | 25265  | 3 | 952.80  | 5.56   |
| P64076 ENO_SALTY Enolase                                  | 16 |                       | DGKYVLAGEGNK                       | 254 | 12 | 4  | 22.09  | b11y4°y4y9                                                                       | 1250.63 | 43.349  | 62002  | 2 | 625.82  | -5.08  |
| P64076 ENO_SALTY Enolase                                  | 17 |                       | VLGDKIQLVGDDLFTVNTNK               | 306 | 19 | 3  | 14.8   | b4y10y14                                                                         | 2075.15 | 80.370  | 25644  | 2 | 1038.08 | 6.94   |
| P64076 ENO_SALTY Enolase                                  | 18 |                       | EAIRMGSEVFHHLAK                    | 180 | 15 | 7  | 52.04  | b3b5°b5b8b10b11°b11                                                              | 1724.87 | 90.135  | 10344  | 3 | 575.63  | -8.92  |
| P64076 ENO_SALTY Enolase                                  | 19 |                       | DQAGIDKIMIDLDGTENK                 | 85  | 18 | 3  | 15.44  | b8b15y16                                                                         | 1975.96 | 84.181  | 6254   | 3 | 659.32  | -3.58  |
| P64076 ENO_SALTY Enolase                                  | 20 |                       | IEEALGEKAPYNGR                     | 411 | 14 | 3  | 27.69  | y5y9y12                                                                          | 1546.77 | 88.306  | 3022   | 2 | 773.89  | -12.86 |
| P64076 ENO_SALTY Enolase                                  | 21 |                       | GYTAVISHR                          | 362 | 9  | 2  | 7.83   | b3°b3                                                                            | 1003.53 | 41.447  | 41333  | 2 | 502.27  | -0.06  |
| P64076 ENO_SALTY Enolase                                  | 22 |                       | AGYTAVISHR                         | 361 | 10 | 0  | 2.47   |                                                                                  | 1074.57 | 41.339  | 5483   | 2 | 537.79  | -1.70  |
| P0A2H9 DSBA_SALTY Thioldisulfide interchange protein dsbA | 1  |                       | AAADLQLQGVPAMFVNGK                 | 158 | 18 | 23 | 176.23 | b2b4b5b6b7b8b9b10y1y2y3*y3y4*y4y5y7y8*y8y10y11*y11y12y18                         | 1829.96 | 80.571  | 133407 | 2 | 915.49  | 3.27   |
| P0A2H9 DSBA_SALTY Thioldisulfide interchange protein dsbA | 2  |                       | YQINPQGMDTSSMDVFVQYAD TVK          | 176 | 25 | 18 | 72.18  | b2°b2b4°b4b6b7b14y1y4y5y7°y7y8y9*y9y14°y14y25                                    | 2865.30 | 86.427  | 77475  | 3 | 955.77  | -1.70  |

|                                                            |    |                                                      |                              |     |    |    |        |                                                                                                            |         |         |        |   |         |        |
|------------------------------------------------------------|----|------------------------------------------------------|------------------------------|-----|----|----|--------|------------------------------------------------------------------------------------------------------------|---------|---------|--------|---|---------|--------|
| P0A2H9 DSBA_SALTY Thiol:disulfide interchange protein dsbA | 3  |                                                      | TQTVQSAADIRK                 | 116 | 12 | 9  | 68.5   | b8*b8y2y3y6y7y8y10y12                                                                                      | 1317.69 | 29.069  | 71248  | 3 | 439.90  | -13.90 |
| P0A2H9 DSBA_SALTY Thiol:disulfide interchange protein dsbA | 4  |                                                      | TQTVQSAADIR                  | 116 | 11 | 9  | 36.46  | b2*b2b6y2y7*y7y9y10y11                                                                                     | 1189.61 | 35.021  | 36166  | 2 | 595.31  | -5.34  |
| P0A2H9 DSBA_SALTY Thiol:disulfide interchange protein dsbA | 5  |                                                      | ELTQAWAVAMALGVEDK            | 88  | 17 | 4  | 25.92  | b13y6y8y11                                                                                                 | 1831.93 | 60.157  | 5956   | 2 | 916.47  | 0.07   |
| P0A2H9 DSBA_SALTY Thiol:disulfide interchange protein dsbA | 6  |                                                      | VFVDAGVKGEDYDAAWNSFVVK       | 128 | 22 | 4  | 34.66  | b10b11*b11b12                                                                                              | 2416.20 | 117.074 | 3771   | 3 | 806.07  | 9.30   |
| P0A2H9 DSBA_SALTY Thiol:disulfide interchange protein dsbA | 7  | Oxidation+M(10)                                      | ELTQAWAVAMALGVEDK            | 88  | 17 | 3  | 16.17  | b3b6y5                                                                                                     | 1847.93 | 102.645 | 2938   | 2 | 924.47  | 6.80   |
| P0A1P0 G3P1_SALTY Glyceraldehyde-3-phohate dehydrogenase   | 1  |                                                      | VINDNFGIIEGLMTTVHATTATQK     | 160 | 24 | 37 | 271.9  | b2b3b4*b4b5°b5*b5b6*b6b12b14y3y5y6y7*y7y8°y8y9y10*y10y11y13y14°y14y15*y15y16*y16y18°y18y19y20y21y22y24*y24 | 2574.32 | 98.323  | 575244 | 3 | 858.78  | -0.76  |
| P0A1P0 G3P1_SALTY Glyceraldehyde-3-phohate dehydrogenase   | 2  |                                                      | AGIALNDNFVK                  | 296 | 11 | 16 | 130.87 | b3b4b7b8b10*b10y1y2y3y5*y5y6y7*y7y8y11                                                                     | 1161.62 | 61.254  | 286842 | 2 | 581.31  | -6.31  |
| P0A1P0 G3P1_SALTY Glyceraldehyde-3-phohate dehydrogenase   | 3  |                                                      | GASQNIIPSSTGAAK              | 198 | 15 | 22 | 155.71 | b5°b5*b5b6°b6*b6b7°b7*b7b13b15y2y3y4y5y6y7y8y9y10y11y15                                                    | 1401.73 | 40.606  | 281915 | 2 | 701.37  | -2.87  |
| P0A1P0 G3P1_SALTY Glyceraldehyde-3-phohate dehydrogenase   | 4  |                                                      | LVSWYDNETGYSNK               | 307 | 14 | 16 | 156.76 | b3b9b11b12y2y3y4y5y6y8y9y10y11y12°y12y14                                                                   | 1675.77 | 58.040  | 244222 | 2 | 838.39  | 3.57   |
| P0A1P0 G3P1_SALTY Glyceraldehyde-3-phohate dehydrogenase   | 5  |                                                      | AATYEQIK                     | 249 | 8  | 13 | 53.8   | y2y4°y4*y4y5*y5y6*y6y7°y7*y7y8*y8                                                                          | 923.47  | 30.918  | 148889 | 2 | 462.24  | -11.70 |
| P0A1P0 G3P1_SALTY Glyceraldehyde-3-phohate dehydrogenase   | 6  |                                                      | VPTPNVSVVDLTVR               | 232 | 14 | 17 | 138.71 | b2b3°b3y1y2y3y4y5y6y7y8y9y11y12°y12y13y14                                                                  | 1495.85 | 70.790  | 132750 | 2 | 748.43  | 0.49   |
| P0A1P0 G3P1_SALTY Glyceraldehyde-3-phohate dehydrogenase   | 7  |                                                      | LTGMAFR                      | 225 | 7  | 5  | 40.25  | y1y4y5y6y7                                                                                                 | 795.41  | 49.311  | 82990  | 2 | 398.21  | -11.13 |
| P0A1P0 G3P1_SALTY Glyceraldehyde-3-phohate dehydrogenase   | 8  |                                                      | VVLTGPSKDNTPMFVK             | 116 | 16 | 4  | 24.71  | b2y5y8y13                                                                                                  | 1732.91 | 57.560  | 61609  | 3 | 578.31  | -12.75 |
| P0A1P0 G3P1_SALTY Glyceraldehyde-3-phohate dehydrogenase   | 9  |                                                      | VLPELNGK                     | 217 | 8  | 11 | 66.94  | b2y2y3y4y5°y5y6°y6*y6y7y8                                                                                  | 869.50  | 44.613  | 52529  | 2 | 435.25  | -8.28  |
| P0A1P0 G3P1_SALTY Glyceraldehyde-3-phohate dehydrogenase   | 10 |                                                      | SDIEIVAINDLLDAEYMAYMLK       | 24  | 22 | 10 | 42.4   | b4b6°b6b10°b10*b10b13y4y6y13                                                                               | 2530.21 | 87.842  | 13791  | 2 | 1265.61 | -15.73 |
| P0A1P0 G3P1_SALTY Glyceraldehyde-3-phohate dehydrogenase   | 11 | Carbamidomethyl+C(12)<br>;Carbamidomethyl+C(16)<br>) | YEQDIVSNASCTTNCLAPLAK        | 138 | 22 | 5  | 17.98  | b3b9y11y15*y15                                                                                             | 2412.12 | 119.417 | 2040   | 3 | 804.71  | -0.61  |
| P0A1P0 G3P1_SALTY Glyceraldehyde-3-phohate dehydrogenase   | 12 | Carbamidomethyl+C(18)<br>;Carbamidomethyl+C(22)<br>) | GANFDKYEGQDIVSNASCTTNCLAPLAK | 132 | 28 | 34 | 282.31 | b3b4b5b7b8b11°b11*b11b12°b12b13°b13*b13b15b16b18b24*b24b27y3y4y5y6y8y9y10*y10y11y12y13y14y15*y15y16        | 3044.41 | 66.771  | 346053 | 3 | 1015.48 | 1.04   |

|                                                          |    |                 |                          |     |    |    |        |                                                                                           |         |         |        |   |         |        |
|----------------------------------------------------------|----|-----------------|--------------------------|-----|----|----|--------|-------------------------------------------------------------------------------------------|---------|---------|--------|---|---------|--------|
| P0A1P0 G3P1_SALTY Glyceraldehyde-3-phohate dehydrogenase | 13 |                 | RSDIEIVAINDLLDAEYMayMLK  | 23  | 23 | 6  | 33.57  | b4b6b7b14y6y9                                                                             | 2686.35 | 136.185 | 21812  | 3 | 896.12  | 0.00   |
| P0A1P0 G3P1_SALTY Glyceraldehyde-3-phohate dehydrogenase | 14 |                 | GGRGASQNIIPSSTGAAK       | 195 | 18 | 6  | 26.36  | b8°b8*b8y3y8y9                                                                            | 1671.86 | 36.698  | 6302   | 3 | 557.96  | -11.46 |
| P0A1P0 G3P1_SALTY Glyceraldehyde-3-phohate dehydrogenase | 15 | Oxidation+M(20) | SDIEIVAINDLLDAEYMayMLK   | 24  | 22 | 3  | 13.32  | b5y5y11                                                                                   | 2546.24 | 131.500 | 1738   | 2 | 1273.62 | -0.10  |
| P0A1P0 G3P1_SALTY Glyceraldehyde-3-phohate dehydrogenase | 16 |                 | NTPMFVK                  | 125 | 7  | 0  | 4.53   |                                                                                           | 836.43  | 57.548  | 1659   | 1 | 836.43  | -7.37  |
| P0A1P0 G3P1_SALTY Glyceraldehyde-3-phohate dehydrogenase | 17 |                 | AATYEQIK                 | 249 | 8  | 0  | 1.23   |                                                                                           | 905.46  | 30.906  | 57467  | 2 | 453.23  | -7.01  |
| P0A1P0 G3P1_SALTY Glyceraldehyde-3-phohate dehydrogenase | 18 |                 | LTGMAFR                  | 225 | 7  | 0  | 0.82   |                                                                                           | 777.40  | 49.263  | 5757   | 2 | 389.20  | -3.61  |
| P41031 CY_SALTY Thiosulfate-binding protein              | 1  |                 | ELFAALNPPFEQQWAK         | 37  | 16 | 32 | 187.18 | b2°b2b3°b3b4°b4b5°b5b6b7*b7b12°b12*b12b14b15y1y2y4*y4y6y7y8y9*y9y11°y11*y11y12*y12y13°y13 | 1888.97 | 90.078  | 89005  | 2 | 944.99  | 4.72   |
| P41031 CY_SALTY Thiosulfate-binding protein              | 2  |                 | QYEAQGFVVIPK             | 226 | 13 | 9  | 45.86  | b3*b3b4b10°b10b11°b11y2y13                                                                | 1507.78 | 69.768  | 75731  | 2 | 754.39  | 0.97   |
| P41031 CY_SALTY Thiosulfate-binding protein              | 3  |                 | VNNPEIMGK                | 286 | 9  | 8  | 67.35  | b2y3y4y6y7*y7y8y9                                                                         | 1001.50 | 35.979  | 73677  | 2 | 501.26  | -4.33  |
| P41031 CY_SALTY Thiosulfate-binding protein              | 4  |                 | LPNNSSPFYSTMGFLVR        | 110 | 17 | 9  | 74.37  | y2y3y5y7y8y9y11y12y17                                                                     | 1929.97 | 92.212  | 73103  | 2 | 965.49  | 6.70   |
| P41031 CY_SALTY Thiosulfate-binding protein              | 5  |                 | TEQFMTQFLK               | 179 | 10 | 6  | 51.61  | b2y3y5y6y7y10                                                                             | 1272.63 | 75.676  | 71361  | 2 | 636.82  | 3.65   |
| P41031 CY_SALTY Thiosulfate-binding protein              | 6  |                 | QALAILQGLK               | 71  | 10 | 6  | 26.71  | b3*b3y1y2y5y7                                                                             | 1054.66 | 75.194  | 51375  | 2 | 527.83  | -6.13  |
| P41031 CY_SALTY Thiosulfate-binding protein              | 7  |                 | LIFPNPK                  | 146 | 7  | 8  | 40.25  | b2y2y4y5*y5y6*y6y7                                                                        | 828.49  | 55.965  | 50687  | 2 | 414.75  | -11.35 |
| P41031 CY_SALTY Thiosulfate-binding protein              | 8  |                 | NVEVFDTGGR               | 189 | 10 | 8  | 73.91  | b6y4y5°y5y6y7y8y10                                                                        | 1093.53 | 47.050  | 49657  | 2 | 547.27  | 1.90   |
| P41031 CY_SALTY Thiosulfate-binding protein              | 9  |                 | GATTTFAER                | 199 | 9  | 5  | 45.18  | b8y4y5y6y9                                                                                | 953.47  | 30.853  | 23927  | 2 | 477.24  | -3.33  |
| P41031 CY_SALTY Thiosulfate-binding protein              | 10 |                 | AYLNWLYSPQAQTIIHYYR      | 265 | 21 | 6  | 13.75  | b2b5b8°b8y2y9                                                                             | 2664.33 | 94.054  | 7728   | 2 | 1332.67 | 2.38   |
| P41031 CY_SALTY Thiosulfate-binding protein              | 11 |                 | GLGDVLISFESEVNNIRK       | 208 | 18 | 4  | 24.6   | b3b10b12y3                                                                                | 1990.05 | 105.340 | 6297   | 3 | 664.02  | -6.13  |
| P41031 CY_SALTY Thiosulfate-binding protein              | 12 |                 | ADVVTYNQVTDVQILHDK       | 81  | 18 | 7  | 26.36  | b8°b8b12b13°b13y13*y13                                                                    | 2058.01 | 91.585  | 6859   | 3 | 686.67  | -20.64 |
| P41031 CY_SALTY Thiosulfate-binding protein              | 13 |                 | TSGNAR                   | 153 | 6  | 1  | 13.55  | b5                                                                                        | 605.30  | 87.109  | 1831   | 1 | 605.30  | -4.03  |
| P41031 CY_SALTY Thiosulfate-binding protein              | 14 |                 | TNILAEFPVAVDKNVQANGTEK   | 239 | 23 | 5  | 37.01  | b3b4y6y19y20                                                                              | 2544.31 | 91.225  | 153486 | 3 | 848.78  | 0.86   |
| P41031 CY_SALTY Thiosulfate-binding protein              | 15 |                 | YTYLAAWGAADNADGGDKAK     | 159 | 20 | 3  | 21.03  | y6y9y13                                                                                   | 2057.94 | 61.988  | 50707  | 3 | 686.65  | -5.58  |
| P41031 CY_SALTY Thiosulfate-binding protein              | 16 |                 | TSGNARYTYLAAWGAADNADGGDK | 153 | 24 | 5  | 23.25  | b9b14b15y15°y15                                                                           | 2445.13 | 93.922  | 8687   | 4 | 612.04  | 8.99   |
| P41031 CY_SALTY Thiosulfate-binding protein              | 17 |                 | FGSWPEVMKTHFASGGELDK     | 311 | 20 | 10 | 51.62  | b7b9°b9y5y6°y6y8y9y11°y11                                                                 | 2223.08 | 136.386 | 5662   | 2 | 1112.04 | 12.41  |
| P41031 CY_SALTY Thiosulfate-binding protein              | 18 |                 | QADKFPQTELFR             | 295 | 12 | 3  | 32.3   | b3b5b10                                                                                   | 1479.76 | 68.616  | 3525   | 2 | 740.38  | -2.72  |
| P41031 CY_SALTY Thiosulfate-binding protein              | 19 |                 | THFASGGELDKLLAAGR        | 320 | 17 | 3  | 16.17  | b4b9y14                                                                                   | 1742.93 | 76.053  | 3517   | 3 | 581.65  | 5.74   |

|                                                      |    |                       |                           |     |    |    |        |                                                                             |         |         |        |   |         |        |
|------------------------------------------------------|----|-----------------------|---------------------------|-----|----|----|--------|-----------------------------------------------------------------------------|---------|---------|--------|---|---------|--------|
| P41031 CY_SALTY Thiosulfate-binding protein          | 20 |                       | NVEVFDTGGRGATTTFaER       | 189 | 19 | 6  | 40.5   | b5b9b12b15y10y14                                                            | 2027.99 | 72.935  | 2517   | 3 | 676.67  | 6.68   |
| P41031 CY_SALTY Thiosulfate-binding protein          | 21 | Phosphoryl STY(11)    | GLGDVLISFESEVNNIRK        | 208 | 18 | 3  | 24.36  | b4b9b10                                                                     | 2070.02 | 136.259 | 7079   | 2 | 1035.51 | 0.59   |
| P41031 CY_SALTY Thiosulfate-binding protein          | 22 | Oxidation+M(8)        | FGSWPEVMK                 | 311 | 9  | 6  | 78.73  | b4b5y4y5y7y8                                                                | 1096.51 | 112.656 | 1656   | 1 | 1096.51 | -2.56  |
| P41031 CY_SALTY Thiosulfate-binding protein          | 23 |                       | AYLNWLYSPQAQTII           | 265 | 15 | 0  | 6.58   |                                                                             | 1780.92 | 94.121  | 1697   | 2 | 890.96  | -5.35  |
| Q7CQ05 GRCA_SALTY Autonomous glycyI radical cofactor | 1  |                       | SGFAEDEVVAVSK             | 35  | 13 | 17 | 131.82 | b2b3b4°b4b5b10y1y2°y2y3y4y6y7y8y9y10y13                                     | 1337.66 | 54.140  | 226772 | 2 | 669.33  | 0.73   |
| Q7CQ05 GRCA_SALTY Autonomous glycyI radical cofactor | 2  |                       | LGEIEYR                   | 48  | 7  | 10 | 82.68  | b3b5y2y3y4y5°y5y6°y6y7                                                      | 879.45  | 42.134  | 184742 | 2 | 440.23  | -10.62 |
| Q7CQ05 GRCA_SALTY Autonomous glycyI radical cofactor | 3  |                       | MITGIQITK                 | 0   | 9  | 9  | 59.57  | b1b2b3b6y2y3y6y7y9                                                          | 1004.57 | 54.814  | 174793 | 2 | 502.79  | -9.72  |
| Q7CQ05 GRCA_SALTY Autonomous glycyI radical cofactor | 4  |                       | EIPMEVKPEVR               | 55  | 11 | 8  | 65.16  | y1y2y4y5y6y8y9y11                                                           | 1326.71 | 48.771  | 131483 | 2 | 663.86  | -1.01  |
| Q7CQ05 GRCA_SALTY Autonomous glycyI radical cofactor | 5  |                       | VEGGQHNLNVNVLr            | 66  | 13 | 7  | 52.6   | b3b4b8y4y6y7y13                                                             | 1434.76 | 50.424  | 108467 | 3 | 478.92  | -14.55 |
| Q7CQ05 GRCA_SALTY Autonomous glycyI radical cofactor | 6  |                       | FNSLTPEQQR                | 106 | 10 | 23 | 112.55 | b2°b2b3°b3°b3b9b10y1y2y3°y3y4y5°y5y6°y6y7y8°y8y9°y9y10°y10                  | 1219.60 | 37.841  | 104997 | 2 | 610.31  | -2.00  |
| Q7CQ05 GRCA_SALTY Autonomous glycyI radical cofactor | 7  |                       | FNSLTPEQQRDVIAr           | 106 | 15 | 9  | 36.78  | b3°b3b11y1y6y10°y10y13y15                                                   | 1773.91 | 47.437  | 51369  | 3 | 591.98  | -7.16  |
| Q7CQ05 GRCA_SALTY Autonomous glycyI radical cofactor | 8  |                       | AANDDLLNSFWLLDSEK         | 9   | 17 | 3  | 16.17  | b3b15y9                                                                     | 1950.96 | 101.429 | 6032   | 2 | 975.98  | 8.76   |
| Q7CQ05 GRCA_SALTY Autonomous glycyI radical cofactor | 9  |                       | TFTESL                    | 121 | 6  | 10 | 79.26  | b3°b3b4°b4b5°b5y3y4y5°y5                                                    | 697.34  | 55.033  | 89932  | 1 | 697.34  | -2.10  |
| Q7CQ05 GRCA_SALTY Autonomous glycyI radical cofactor | 10 |                       | AANDDLLNSFWLLDSEKGear     | 9   | 21 | 24 | 199.6  | b3b5°b5b6°b6y4y5y7°y7y8y9°y9y10y11y12y13y14°y14y15y16y17°y17y19°y19         | 2364.14 | 92.999  | 563921 | 3 | 788.72  | -4.23  |
| Q7CQ05 GRCA_SALTY Autonomous glycyI radical cofactor | 11 | Carbamidomethyl+C(1)  | CIVAKSGFAEDEVVAVSK        | 30  | 18 | 3  | 15.44  | b4b8y10                                                                     | 1908.95 | 121.869 | 19235  | 2 | 954.98  | -11.57 |
| Q7CQ05 GRCA_SALTY Autonomous glycyI radical cofactor | 12 |                       | ITGIQITKAANDDLLNSFWLLDSEK | 1   | 25 | 7  | 50.13  | y5y6y7°y7y9°y9y10                                                           | 2805.47 | 136.352 | 4523   | 3 | 935.83  | 0.96   |
| Q7CQ05 GRCA_SALTY Autonomous glycyI radical cofactor | 13 |                       | VSGYAVRFNSLTPEQQR         | 99  | 17 | 4  | 25.92  | b12y5y11y13                                                                 | 1951.98 | 103.667 | 2124   | 3 | 651.33  | -10.26 |
| Q7CQ05 GRCA_SALTY Autonomous glycyI radical cofactor | 14 |                       | PMEVKPEVR                 | 57  | 9  | 3  | 31.1   | b3b4b7                                                                      | 1084.58 | 48.794  | 134579 | 2 | 542.79  | -6.08  |
| Q7CQ05 GRCA_SALTY Autonomous glycyI radical cofactor | 15 |                       | EIPMEVKPEVR               | 55  | 11 | 0  | 2.47   |                                                                             | 1308.68 | 48.789  | 47524  | 3 | 436.90  | -10.82 |
| Q8ZP65 TPX_SALTY Probable thiol peroxidase           | 1  |                       | SQTVHFQGNPVTVANVIPQAGSK   | 1   | 23 | 28 | 187.38 | b2°b2b3b5°b5b7°b7b9b11b12°b12°b12b13b14b16y2y4°y4y6°y6y7y8y9y10y11y12y17y23 | 2379.24 | 64.418  | 162086 | 3 | 793.75  | -1.03  |
| Q8ZP65 TPX_SALTY Probable thiol peroxidase           | 2  | Carbamidomethyl+C(2)  | FCGAEGLSNVITLSTLR         | 93  | 17 | 7  | 38.85  | b2b3y4y6y13y15y17                                                           | 1837.95 | 86.290  | 130563 | 2 | 919.48  | 3.85   |
| Q8ZP65 TPX_SALTY Probable thiol peroxidase           | 3  | Carbamidomethyl+C(13) | VLNIFPSIDTGVCAASVR        | 48  | 18 | 10 | 46.46  | b2b3b5°b5y9y13°y13y14y15y18                                                 | 1919.02 | 85.327  | 119137 | 2 | 960.01  | 5.47   |
| Q8ZP65 TPX_SALTY Probable thiol peroxidase           | 4  |                       | AQAFTLVAK                 | 24  | 9  | 6  | 57.22  | y2y3y4y6y7y9                                                                | 948.54  | 53.183  | 95043  | 2 | 474.78  | -8.17  |
| Q8ZP65 TPX_SALTY Probable thiol peroxidase           | 5  |                       | NYGVEIVDGPLK              | 116 | 12 | 10 | 71.07  | b1b2b3b4b9y4y8y9y10y12                                                      | 1303.69 | 64.815  | 33770  | 2 | 652.35  | -1.59  |
| Q8ZP65 TPX_SALTY Probable thiol peroxidase           | 6  |                       | DLSDVSLSQYAGKR            | 33  | 14 | 5  | 27.32  | b7b12y7y9°y9                                                                | 1538.76 | 54.618  | 13671  | 3 | 513.59  | -11.66 |

|                                            |    |                       |                                     |     |    |    |        |                                             |         |         |        |   |         |        |
|--------------------------------------------|----|-----------------------|-------------------------------------|-----|----|----|--------|---------------------------------------------|---------|---------|--------|---|---------|--------|
| Q8ZP65 TPX_SALTY Probable thiol peroxidase | 7  |                       | AVIVLDENDNVIFSQLVDEITHEPDYDAALNVLK  | 133 | 34 | 4  | 10.96  | b2b10y12y14                                 | 3811.92 | 119.489 | 6444   | 3 | 1271.31 | -2.56  |
| Q8ZP65 TPX_SALTY Probable thiol peroxidase | 8  | Carbamidomethyl+C(15) | FNQLATEVENTVVLCSADLPFAQSR           | 67  | 26 | 4  | 21.83  | b6b7y8°y8                                   | 2908.44 | 87.623  | 4827   | 3 | 970.15  | -2.10  |
| Q8ZP65 TPX_SALTY Probable thiol peroxidase | 9  |                       | DLSDVLSQYAGK                        | 33  | 13 | 12 | 123.91 | b4°b4b5b6y4y5y6*y6y7y9y10y11                | 1382.67 | 58.858  | 6661   | 1 | 1382.67 | -5.30  |
| Q8ZP65 TPX_SALTY Probable thiol peroxidase | 10 |                       | AVIVLDENDNVIFSQLVDEITHEPDYDAALNVLKA | 133 | 35 | 15 | 123.47 | b3b4b5b6b11y3y4y5y8y12y13y14y24y29y30       | 3882.97 | 121.450 | 108171 | 3 | 1294.99 | 1.32   |
| Q8ZP65 TPX_SALTY Probable thiol peroxidase | 11 | Phosphoryl STY(12)    | SQTVHFQGNPVTVANVIPQAGSK             | 1   | 23 | 8  | 29.21  | b4b6b10*b10b11*b11y6°y6                     | 2459.23 | 136.369 | 2120   | 2 | 1230.12 | 13.40  |
| Q8ZP65 TPX_SALTY Probable thiol peroxidase | 12 |                       | AQAFTLVAK                           | 24  | 9  | 0  | 1.65   |                                             | 931.51  | 53.299  | 5530   | 2 | 466.26  | -11.53 |
| Q8ZK80 RL9_SALTY 50S ribosomal protein L9  | 1  |                       | LADVLAANAR                          | 57  | 11 | 16 | 126.89 | b2b3b4y1y3*y3y4*y4y5y6*y6y7y8y9y10y11       | 1084.60 | 53.127  | 230109 | 2 | 542.80  | -8.44  |
| Q8ZK80 RL9_SALTY 50S ribosomal protein L9  | 2  |                       | VANLGSLGDQVNVK                      | 8   | 14 | 16 | 122.69 | b2b3b9*b9b10*b10b13y3y7y8y9y10°y10y11y12y14 | 1413.77 | 56.251  | 141651 | 2 | 707.39  | 2.50   |
| Q8ZK80 RL9_SALTY 50S ribosomal protein L9  | 3  |                       | DIADAVTAAGVDVAK                     | 97  | 15 | 16 | 152.4  | b2b3b5b6b9°b9b12y3y6y7y8y9y10y11y13y15      | 1415.74 | 65.905  | 96474  | 2 | 708.37  | 3.45   |
| Q8ZK80 RL9_SALTY 50S ribosomal protein L9  | 4  |                       | INALETVTIASK                        | 71  | 12 | 4  | 22.09  | b4y9y11y12                                  | 1259.71 | 60.956  | 60738  | 2 | 630.36  | -4.94  |
| Q8ZK80 RL9_SALTY 50S ribosomal protein L9  | 5  |                       | MQVILLDK                            | 0   | 8  | 3  | 40.66  | y3y4y5                                      | 959.55  | 64.363  | 96400  | 2 | 480.28  | -6.23  |
| Q8ZK80 RL9_SALTY 50S ribosomal protein L9  | 6  |                       | NVEYFEAR                            | 42  | 8  | 3  | 40.66  | y3y5y6                                      | 1027.48 | 46.767  | 86462  | 2 | 514.25  | -0.95  |
| Q8ZK80 RL9_SALTY 50S ribosomal protein L9  | 7  |                       | AGDEGKLFGSIGTR                      | 83  | 14 | 5  | 45.1   | b7y3y6y7y8                                  | 1407.70 | 55.000  | 83223  | 3 | 469.91  | -12.92 |
| Q8ZK80 RL9_SALTY 50S ribosomal protein L9  | 8  |                       | LPNGVLRTTGEHEVNFQVHSEVFAK           | 116 | 25 | 4  | 12.31  | b23°b23y7y10                                | 2808.48 | 112.600 | 7957   | 3 | 936.83  | 11.47  |
| P0A1E3 CYSK_SALTY Cysteine synthase A      | 1  |                       | LTLTMPETMSIER                       | 87  | 13 | 14 | 112.53 | b2°b2b5°b5y1y4y5y6y8y9y10y11y12y13          | 1521.77 | 73.820  | 132711 | 2 | 761.39  | 2.97   |
| P0A1E3 CYSK_SALTY Cysteine synthase A      | 2  |                       | IQGIGAGFIPGNLDLK                    | 226 | 16 | 14 | 76.73  | b1b2°b2b3b4b8b9y1y2y7y10y12y14y16           | 1612.91 | 83.544  | 120975 | 2 | 806.96  | 3.33   |
| P0A1E3 CYSK_SALTY Cysteine synthase A      | 3  |                       | YLLLQQFSNPANPEIHEK                  | 137 | 18 | 15 | 94.7   | b2b3y2°y2y3°y3y4y6°y6y7y9y11*y11y12y16      | 2141.10 | 74.136  | 106656 | 3 | 714.37  | 0.57   |
| P0A1E3 CYSK_SALTY Cysteine synthase A      | 4  |                       | IYEDNSLTIGHTPLVR                    | 3   | 16 | 5  | 24.71  | y2y4y7°y7y14                                | 1827.94 | 61.786  | 58172  | 3 | 609.98  | -12.09 |
| P0A1E3 CYSK_SALTY Cysteine synthase A      | 5  |                       | LQEDESFTNK                          | 283 | 10 | 4  | 36.71  | y6y7y8y10                                   | 1210.56 | 34.912  | 47742  | 2 | 605.78  | 2.82   |
| P0A1E3 CYSK_SALTY Cysteine synthase A      | 6  |                       | NIVVILPSSGER                        | 293 | 12 | 9  | 82.32  | b2b3b4y6y7y8y9y10y12                        | 1283.73 | 63.870  | 47604  | 2 | 642.37  | -2.00  |
| P0A1E3 CYSK_SALTY Cysteine synthase A      | 7  |                       | ALGANLVLTEGAK                       | 105 | 13 | 4  | 29.7   | b2y5y7y9                                    | 1256.71 | 61.051  | 42387  | 2 | 628.86  | -4.76  |
| P0A1E3 CYSK_SALTY Cysteine synthase A      | 8  |                       | AEEIVASDPQK                         | 126 | 11 | 12 | 112.96 | b3b4°b4b5°b5b6y3y6y7y8y9y11                 | 1186.59 | 31.254  | 31954  | 2 | 593.80  | -4.32  |
| P0A1E3 CYSK_SALTY Cysteine synthase A      | 9  |                       | VVGITNEEAISTAR                      | 246 | 14 | 4  | 38.49  | y4y9y10y12                                  | 1459.78 | 49.191  | 26794  | 2 | 730.39  | 2.17   |
| P0A1E3 CYSK_SALTY Cysteine synthase A      | 10 |                       | GYKLTLTMPETMSIER                    | 84  | 16 | 3  | 25.38  | y7y12y13                                    | 1869.96 | 86.390  | 22168  | 2 | 935.49  | 10.71  |
| P0A1E3 CYSK_SALTY Cysteine synthase A      | 11 |                       | MSKIYEDNSLTIGHTPLVR                 | 0   | 19 | 5  | 37.91  | b10°b10b11b12b14                            | 2174.12 | 84.911  | 1539   | 2 | 1087.57 | -1.35  |
| P0A1E3 CYSK_SALTY Cysteine synthase A      | 12 | Oxidation+M(5)        | IGANMIWDAEK                         | 44  | 11 | 3  | 24.11  | b3y3y6                                      | 1263.61 | 43.349  | 53557  | 2 | 632.31  | 6.09   |
| P0A1E3 CYSK_SALTY Cysteine synthase A      | 13 |                       | LTMPETMSIER                         | 89  | 11 | 0  | 3.29   |                                             | 1307.63 | 73.871  | 4585   | 2 | 654.32  | -0.84  |

|                                                |    |                                             |                                  |     |    |    |        |                                                                |         |         |        |   |         |        |
|------------------------------------------------|----|---------------------------------------------|----------------------------------|-----|----|----|--------|----------------------------------------------------------------|---------|---------|--------|---|---------|--------|
| [P0A299]RL7_SALTY 50S ribosomal protein L7/L12 | 1  |                                             | DQIIEAVSAMSVM DVVELISAMEE K      | 5   | 25 | 26 | 196.21 | b2°b2*b2b3b4b5b6b7b8b9°b9b10y2°y2y3°y3y4y5°y5y6y7y8°y8y9y10y25 | 2737.34 | 137.221 | 66727  | 3 | 913.12  | 0.45   |
| [P0A299]RL7_SALTY 50S ribosomal protein L7/L12 | 2  |                                             | DLVESAPAALK                      | 85  | 11 | 7  | 59.73  | b3b4b8y5y7y8y11                                                | 1113.61 | 53.225  | 36269  | 2 | 557.31  | -7.78  |
| [P0A299]RL7_SALTY 50S ribosomal protein L7/L12 | 3  |                                             | DLVESAPAALKEGVSK                 | 85  | 16 | 3  | 17     | b5b7y10                                                        | 1613.86 | 56.454  | 6135   | 3 | 538.63  | -8.02  |
| [P0A299]RL7_SALTY 50S ribosomal protein L7/L12 | 4  |                                             | SLEEAGAEVEVK                     | 109 | 12 | 4  | 32.3   | b3°b3b5b11                                                     | 1260.65 | 58.983  | 9128   | 3 | 420.89  | 17.53  |
| [P0A299]RL7_SALTY 50S ribosomal protein L7/L12 | 5  |                                             | FGVSAAA AVAVAAGPAEAAEEK          | 30  | 22 | 8  | 54.21  | b9b10°b10y4y5°y5y9y10                                          | 1987.00 | 105.895 | 2755   | 2 | 994.01  | -4.61  |
| [P0A299]RL7_SALTY 50S ribosomal protein L7/L12 | 6  |                                             | FGVSAAA AVAVAAGPAEAAEEKT EFDVILK | 30  | 30 | 9  | 32.2   | b3b4°b4b7°b7b10°b10b23°b23                                     | 2932.51 | 136.256 | 14733  | 3 | 978.18  | -5.41  |
| [P0A299]RL7_SALTY 50S ribosomal protein L7/L12 | 7  |                                             | SITKDQIIEAVSAMSVM DVVELISAMEEK   | 1   | 29 | 4  | 26.43  | y7y8y10y13                                                     | 3166.62 | 90.122  | 5340   | 3 | 1056.21 | 7.79   |
| [P0A299]RL7_SALTY 50S ribosomal protein L7/L12 | 8  |                                             | EAKDLVESAPAALK                   | 82  | 14 | 3  | 19.11  | b4b9y8                                                         | 1441.79 | 61.072  | 2325   | 2 | 721.40  | 2.62   |
| [P0A299]RL7_SALTY 50S ribosomal protein L7/L12 | 9  | Phosphoryl STY()                            | EAKDLVESAPAALK                   | 82  | 14 | 4  | 26.89  | b6b7°b7b9                                                      | 1521.74 | 43.427  | 2697   | 2 | 761.38  | -2.25  |
| [Q8ZKP7]TPIS_SALTY Triosephohate isomerase     | 1  | Carbamidomethyl+C(8)                        | ELTGVAGCDVAIAPPEMYIDLAKR         | 28  | 24 | 8  | 42.53  | b13y10y11y12°y12y14y19y24                                      | 2589.31 | 82.887  | 88722  | 3 | 863.77  | 1.79   |
| [Q8ZKP7]TPIS_SALTY Triosephohate isomerase     | 2  |                                             | SATPAQAQAVHK                     | 176 | 12 | 19 | 108.14 | b2b3°b3b5°b5b7°b7y1y2y4y5°y5y6y7°y7y8°y8y9y12                  | 1208.63 | 18.395  | 59198  | 2 | 604.82  | -6.06  |
| [Q8ZKP7]TPIS_SALTY Triosephohate isomerase     | 3  |                                             | TQGAAAFEGAVIAYEPVWAIGTG K        | 152 | 24 | 13 | 47.25  | b3°b3b5°b7b11b13b14y1y2y7y10y12y24                             | 2407.25 | 93.886  | 25589  | 2 | 1204.13 | 6.90   |
| [Q8ZKP7]TPIS_SALTY Triosephohate isomerase     | 4  | Carbamidomethyl+C(8)                        | ELTGVAGCDVAIAPPEMYIDLAK          | 28  | 23 | 5  | 23.03  | y1y3y4y10y23                                                   | 2433.20 | 88.212  | 18934  | 2 | 1217.11 | 0.10   |
| [Q8ZKP7]TPIS_SALTY Triosephohate isomerase     | 5  | Carbamidomethyl+C(9)                        | EQGLTPVLCIGETEAEENEAGK           | 117 | 21 | 3  | 12.65  | b4b9b13°                                                       | 2245.10 | 72.114  | 3049   | 2 | 1123.05 | 13.59  |
| [Q8ZKP7]TPIS_SALTY Triosephohate isomerase     | 6  | Carbamidomethyl+C(9); Carbamidomethyl+C(26) | EQGLTPVLCIGETEAEENEAGKTEE VCAR   | 117 | 28 | 15 | 124.41 | b5°b5b7y3y4y7y10y12y13y18y20y21y23y24y26                       | 3090.44 | 72.057  | 175231 | 3 | 1030.82 | 2.05   |
| [Q8ZKP7]TPIS_SALTY Triosephohate isomerase     | 7  | Carbamidomethyl+C(9); Phosphoryl STY(13)    | EQGLTPVLCIGETEAEENEAGK           | 117 | 21 | 4  | 18.72  | b5b12y4y7                                                      | 2325.05 | 68.572  | 5513   | 3 | 775.69  | 13.97  |
| [Q8ZKP7]TPIS_SALTY Triosephohate isomerase     | 8  |                                             | TPAQAQAVHK                       | 178 | 10 | 10 | 78.72  | b3°b3b4°b4b5°b5b6°b6b7b8                                       | 1050.56 | 18.401  | 23630  | 2 | 525.78  | -6.86  |
| [Q8ZKP7]TPIS_SALTY Triosephohate isomerase     | 9  |                                             | PAQAQAVHK                        | 179 | 9  | 9  | 78.72  | b3°b3b4b5b6°b6b7°b7b8                                          | 949.51  | 18.388  | 22972  | 2 | 475.26  | -8.29  |
| [Q8ZKP7]TPIS_SALTY Triosephohate isomerase     | 10 |                                             | VAIAPPEMYIDLAK                   | 37  | 14 | 0  | 7.41   |                                                                | 1530.81 | 88.235  | 1534   | 3 | 510.94  | -7.42  |
| [Q8ZKP7]TPIS_SALTY Triosephohate isomerase     | 11 |                                             | SATPAQAQAVHK                     | 176 | 12 | 0  | 2.88   |                                                                | 1190.61 | 18.399  | 19025  | 3 | 397.54  | -14.35 |
| [P66593]RS6_SALTY 30S ribosomal protein S6     | 1  |                                             | YSAAITGAEGK                      | 24  | 11 | 18 | 142.25 | b3b4b6b9b11°b11y2y3y4°y4y5y6°y6y7y9y10°y10y11                  | 1067.53 | 33.240  | 136177 | 2 | 534.27  | -5.49  |
| [P66593]RS6_SALTY 30S ribosomal protein S6     | 2  |                                             | FNDAVIR                          | 79  | 7  | 6  | 53.39  | y2y3y4y5y6y7                                                   | 834.44  | 42.456  | 85401  | 2 | 417.72  | -13.09 |
| [P66593]RS6_SALTY 30S ribosomal protein S6     | 3  |                                             | HAVTEASPMVK                      | 93  | 11 | 14 | 98.57  | b2b4°b4b7°b7b10°b10y1y4y7y8y9y10y11                            | 1169.59 | 31.693  | 68179  | 2 | 585.30  | -4.80  |
| [P66593]RS6_SALTY 30S ribosomal protein S6     | 4  |                                             | AHYVLMNVEAPQVEIDELETTFR          | 56  | 23 | 7  | 27.97  | b3b6b7°b7y8y11°y11                                             | 2704.33 | 114.679 | 63454  | 3 | 902.12  | 1.44   |
| [P66593]RS6_SALTY 30S ribosomal protein S6     | 5  |                                             | LEDWGR                           | 38  | 6  | 2  | 29.7   | y3y5                                                           | 775.37  | 38.894  | 17361  | 2 | 388.19  | -8.82  |
| [P66593]RS6_SALTY 30S ribosomal protein S6     | 6  |                                             | YSAAITGAEGKIHR                   | 24  | 14 | 4  | 34.68  | b6b7°b7b8                                                      | 1473.78 | 76.399  | 16455  | 2 | 737.39  | -3.48  |



|                                           |    |                      |                              |     |    |    |        |                                                     |         |         |        |   |         |        |
|-------------------------------------------|----|----------------------|------------------------------|-----|----|----|--------|-----------------------------------------------------|---------|---------|--------|---|---------|--------|
| P66593 RS6_SALTY 30S ribosomal protein S6 | 7  | Oxidation+M(9)       | HAVTEASPMVK                  | 93  | 11 | 4  | 38.04  | b7b8y3y10                                           | 1185.58 | 90.077  | 10451  | 2 | 593.29  | -11.63 |
| P66593 RS6_SALTY 30S ribosomal protein S6 | 8  | Oxidation+M(19)      | HYEIVFMVHPDQSEQVPGMIER       | 2   | 22 | 4  | 13.32  | b8y6y9*y9                                           | 2657.25 | 129.550 | 3639   | 3 | 886.42  | 1.84   |
| P65702 PGK_SALTY Phohoglycerate kinase    | 1  |                      | VLPVAMLEER                   | 373 | 11 | 10 | 70.52  | b2b3y1y2y4y6y7y8y9y11                               | 1227.67 | 80.211  | 221897 | 2 | 614.34  | -6.07  |
| P65702 PGK_SALTY Phohoglycerate kinase    | 2  | Carbamidomethyl+C(6) | FADVACAGPLLAELDALGK          | 156 | 20 | 21 | 191.83 | b2b3b4b5b8b11y1y2y3y4y5y6y7y8y9y12y13y14y15y16y20   | 2002.04 | 99.335  | 177008 | 2 | 1001.52 | 4.27   |
| P65702 PGK_SALTY Phohoglycerate kinase    | 3  | Carbamidomethyl+C(5) | LLTTCDIPVPTDVR               | 244 | 14 | 17 | 119.68 | b2b5b6*b6b7*b7b9b12y1y2y5y7y8y10y11y12y14           | 1599.84 | 68.400  | 167268 | 2 | 800.43  | 1.37   |
| P65702 PGK_SALTY Phohoglycerate kinase    | 4  |                      | VATEFSETAPATLK               | 258 | 14 | 20 | 129.01 | b1b2b3*b3b4*b4b9y2y5*y5y6y7y9*y9y10y11*y11y12y13y14 | 1464.76 | 52.242  | 143283 | 2 | 732.88  | -0.17  |
| P65702 PGK_SALTY Phohoglycerate kinase    | 5  |                      | SLYEADLVDEAKR                | 231 | 13 | 9  | 81.48  | b5y2y4y5y6y8y9y10y13                                | 1508.74 | 54.238  | 124468 | 3 | 503.59  | -12.22 |
| P65702 PGK_SALTY Phohoglycerate kinase    | 6  |                      | TILWNGPVGVFEPNFR             | 302 | 17 | 16 | 128.57 | y3*y3y4*y4y5y6y7y8*y8y11*y11y12y13*y13y14y17        | 1993.04 | 107.113 | 105774 | 2 | 997.03  | 5.94   |
| P65702 PGK_SALTY Phohoglycerate kinase    | 7  |                      | ADLNPVKEGK                   | 19  | 11 | 12 | 81.45  | b1b3b5*b5y2y4*y4y6y7y8y9y11                         | 1169.65 | 36.840  | 105765 | 2 | 585.33  | -1.46  |
| P65702 PGK_SALTY Phohoglycerate kinase    | 8  |                      | MTDLDLAGKR                   | 5   | 10 | 6  | 70.77  | y3y4y5y7y9y10                                       | 1119.58 | 43.041  | 56615  | 2 | 560.29  | -4.03  |
| P65702 PGK_SALTY Phohoglycerate kinase    | 9  |                      | VMVTSHLGRPTEGEYNEEFSLPVVNYLK | 53  | 29 | 6  | 14.38  | b2b6b22y7y25y29                                     | 3321.70 | 93.568  | 36928  | 3 | 1107.90 | 4.41   |
| P65702 PGK_SALTY Phohoglycerate kinase    | 10 |                      | AQASTHGIGK                   | 146 | 10 | 14 | 87.06  | b2*b2b4*b4y1y2y3y4y5y6y7y8*y8y10                    | 969.51  | 15.841  | 31039  | 2 | 485.26  | -4.66  |
| P65702 PGK_SALTY Phohoglycerate kinase    | 11 | Carbamidomethyl+C(5) | YAALCDVFVMDAFGTAHR           | 128 | 18 | 3  | 15.44  | b14y5y13                                            | 2043.95 | 91.597  | 1505   | 4 | 511.74  | 5.49   |
| P65702 PGK_SALTY Phohoglycerate kinase    | 12 |                      | MTDLDLAGK                    | 5   | 9  | 3  | 30.28  | b6y4y5                                              | 963.48  | 48.214  | 20370  | 2 | 482.24  | -3.48  |
| P65702 PGK_SALTY Phohoglycerate kinase    | 13 |                      | LSNPVR                       | 84  | 6  | 1  | 13.55  | y4                                                  | 685.40  | 27.997  | 9028   | 2 | 343.20  | -2.40  |
| P65702 PGK_SALTY Phohoglycerate kinase    | 14 |                      | ISYISTGGGAFLEFVEGK           | 355 | 18 | 4  | 24.6   | b6b10b12y15                                         | 1874.92 | 80.551  | 2856   | 3 | 625.65  | -16.21 |
| P65702 PGK_SALTY Phohoglycerate kinase    | 15 |                      | DYLDGVDVAEGELVVLENVR         | 93  | 20 | 7  | 47.23  | b10b11b14b15*b15y4y6                                | 2204.11 | 100.675 | 2342   | 2 | 1102.56 | 0.55   |
| P65702 PGK_SALTY Phohoglycerate kinase    | 16 |                      | ISYISTGGGAFLEFVEGKVLPVAMLEER | 355 | 29 | 9  | 35.43  | b6b8*b8b9y3*y3y7y8*y8                               | 3083.62 | 136.402 | 3327   | 4 | 771.66  | 1.43   |
| P65702 PGK_SALTY Phohoglycerate kinase    | 17 | Carbamidomethyl+C(6) | KYAALCDVFVMDAFGTAHR          | 127 | 19 | 5  | 33.06  | b6b10b11b14y14                                      | 2172.05 | 86.365  | 2612   | 3 | 724.69  | 7.31   |
| P65702 PGK_SALTY Phohoglycerate kinase    | 18 |                      | YEADLVDEAKR                  | 233 | 11 | 1  | 7.4    | b3                                                  | 1308.65 | 54.267  | 28723  | 2 | 654.83  | 2.61   |
| P65702 PGK_SALTY Phohoglycerate kinase    | 19 |                      | LNVPVKEGK                    | 21  | 9  | 0  | 2.47   |                                                     | 983.59  | 36.848  | 24333  | 2 | 492.30  | -1.49  |
| P65702 PGK_SALTY Phohoglycerate kinase    | 20 |                      | DLNPVPKEGK                   | 20  | 10 | 1  | 7.83   | b3                                                  | 1098.60 | 36.806  | 23726  | 2 | 549.81  | -9.67  |
| P65702 PGK_SALTY Phohoglycerate kinase    | 21 |                      | TDLDLAGKR                    | 6   | 9  | 1  | 8.21   | b3                                                  | 988.54  | 42.991  | 12585  | 2 | 494.77  | -2.41  |
| P65702 PGK_SALTY Phohoglycerate kinase    | 22 |                      | PAVAMLEER                    | 375 | 9  | 2  | 18.75  | b3b5                                                | 1015.52 | 80.238  | 10642  | 2 | 508.26  | -7.57  |
| P65702 PGK_SALTY Phohoglycerate kinase    | 23 |                      | ASTHGIGK                     | 148 | 8  | 5  | 51.61  | b4b5b6b7*b7                                         | 770.41  | 15.846  | 4697   | 2 | 385.71  | -8.87  |
| P65702 PGK_SALTY Phohoglycerate kinase    | 24 |                      | QASTHGIGK                    | 147 | 9  | 2  | 8.21   | b4*b4                                               | 898.46  | 15.862  | 1819   | 2 | 449.73  | -13.59 |

|                                                                        |    |                |                       |     |    |    |        |                                                                         |         |         |        |   |        |        |
|------------------------------------------------------------------------|----|----------------|-----------------------|-----|----|----|--------|-------------------------------------------------------------------------|---------|---------|--------|---|--------|--------|
| P0A2A3 RL1_SALTY 50S ribosomal protein L1                              | 1  |                | VAVFTQGPNAEAAK        | 74  | 14 | 25 | 187.81 | b4b8b9°b9b11°b11°b11b13y1y3y4y5y7y8y9°y9y10y11°y11°y11y12°y12y13y14°y14 | 1402.73 | 44.990  | 174748 | 2 | 701.87 | 0.70   |
| P0A2A3 RL1_SALTY 50S ribosomal protein L1                              | 2  |                | VVGQLGQVLGPR          | 122 | 12 | 10 | 68.5   | b2b4y6y7y8°y8y9y10°y10y12                                               | 1222.72 | 58.978  | 124644 | 2 | 611.86 | -5.79  |
| P0A2A3 RL1_SALTY 50S ribosomal protein L1                              | 3  |                | VGTVTPNVAEAVK         | 141 | 13 | 15 | 126.25 | b2b3°b3b4°b4y3y4y5y6y8y9y10y12°y12y13                                   | 1284.71 | 47.780  | 124497 | 2 | 642.86 | -1.14  |
| P0A2A3 RL1_SALTY 50S ribosomal protein L1                              | 4  |                | AAGAELVGMEDLADQIK     | 88  | 17 | 9  | 53.37  | b7b10b14°b14b15y4y10y11y17                                              | 1730.87 | 79.648  | 28097  | 2 | 865.94 | 4.23   |
| P0A2A3 RL1_SALTY 50S ribosomal protein L1                              | 5  |                | GATVLPHTGTR           | 60  | 11 | 5  | 50.26  | y4y5y6y7y11                                                             | 1065.58 | 30.185  | 24682  | 2 | 533.29 | -4.70  |
| P0A2A3 RL1_SALTY 50S ribosomal protein L1                              | 6  |                | GEMNFDVVIASPDAMR      | 106 | 16 | 3  | 17     | b14y3y5                                                                 | 1751.83 | 62.347  | 15094  | 3 | 584.62 | 13.52  |
| P0A2A3 RL1_SALTY 50S ribosomal protein L1                              | 7  |                | SDQNVRGATVLPHTGTR     | 54  | 17 | 4  | 24.82  | b4b11b12°b12                                                            | 1764.91 | 59.292  | 7757   | 2 | 882.96 | -2.42  |
| P0A2A3 RL1_SALTY 50S ribosomal protein L1                              | 8  |                | KGEMNFDVVIASPDAMR     | 105 | 17 | 5  | 16.17  | b10°b10y9°y9y13                                                         | 1879.90 | 108.888 | 4002   | 2 | 940.45 | -1.04  |
| P0A2A3 RL1_SALTY 50S ribosomal protein L1                              | 9  | Oxidation+M(3) | GEMNFDVVIASPDAMR      | 106 | 16 | 3  | 23.54  | b12y9y10                                                                | 1767.79 | 53.272  | 3318   | 2 | 884.40 | -5.73  |
| P0A2A3 RL1_SALTY 50S ribosomal protein L1                              | 10 |                | TVLPHTGTR             | 62  | 9  | 0  | 2.47   |                                                                         | 937.51  | 30.184  | 17184  | 2 | 469.26 | -10.42 |
| P0AA28 THIO_SALTY Thioredoxin-1                                        | 1  |                | LNIDQNPGTAPK          | 58  | 12 | 25 | 155.8  | b2°b2b3b4°b4b6°b6°b6b7b10y2y3y6y7y8°y8°y8y9°y9°y9y10°y10y11°y11y12      | 1267.66 | 38.298  | 219078 | 2 | 634.33 | -5.20  |
| P0AA28 THIO_SALTY Thioredoxin-1                                        | 2  |                | MIAPILDEIADEYQGK      | 37  | 16 | 25 | 185.41 | b2b3b12b14°b14y1y2y3y4°y4y5°y5y6y7y8°y8y10y11°y11y12y13y14°y14y15y16    | 1805.91 | 93.811  | 157478 | 2 | 903.46 | 4.73   |
| P0AA28 THIO_SALTY Thioredoxin-1                                        | 3  |                | GIPTLLLFK             | 74  | 9  | 8  | 67.35  | b2y2y3y4y5y6y7y9                                                        | 1001.63 | 91.393  | 87864  | 2 | 501.32 | -7.68  |
| P0AA28 THIO_SALTY Thioredoxin-1                                        | 4  |                | IIHLTDDSFDTDLK        | 4   | 15 | 3  | 26.06  | b8b9b14                                                                 | 1731.86 | 86.743  | 2770   | 2 | 866.43 | -13.25 |
| P0AA28 THIO_SALTY Thioredoxin-1                                        | 5  |                | EFLDANLA              | 101 | 8  | 3  | 32.88  | b4b5y4                                                                  | 892.44  | 136.270 | 2120   | 1 | 892.44 | 0.68   |
| P0AA28 THIO_SALTY Thioredoxin-1                                        | 6  |                | MIAPILDEIADEYQGKLTVAK | 37  | 21 | 8  | 46.64  | b3b4b8b14y12°y12y18y19                                                  | 2318.22 | 95.037  | 120604 | 3 | 773.41 | -3.79  |
| P0AA28 THIO_SALTY Thioredoxin-1                                        | 7  |                | SDKIIHLTDDSFDTDLK     | 1   | 18 | 3  | 15.44  | b3b12y6                                                                 | 2062.01 | 56.137  | 1843   | 3 | 688.01 | -12.20 |
| P0AA28 THIO_SALTY Thioredoxin-1                                        | 8  |                | PTLLLFK               | 76  | 7  | 2  | 23.16  | b3b4                                                                    | 831.52  | 91.403  | 85417  | 2 | 416.27 | -12.70 |
| P0AA28 THIO_SALTY Thioredoxin-1                                        | 9  |                | GIPTLLLFK             | 74  | 9  | 0  | 1.65   |                                                                         | 983.62  | 91.406  | 2421   | 2 | 492.31 | -2.85  |
| P0A283 PTGA_SALTY Glucose-ecific phohotransferase enzyme IIA component | 1  |                | STLTPVVISNMDEIKELIK   | 133 | 19 | 12 | 57.37  | b2b3°b3b4°b4b19y3y5y12y13y15y19                                         | 2130.15 | 93.453  | 300478 | 3 | 710.72 | -9.86  |
| P0A283 PTGA_SALTY Glucose-ecific phohotransferase enzyme IIA component | 2  |                | MVAPVDGTIGK           | 59  | 11 | 14 | 123.09 | b2b3b4b10y2y3y5y6y7y8°y8y9y10y11                                        | 1087.58 | 45.876  | 159596 | 2 | 544.29 | -3.03  |
| P0A283 PTGA_SALTY Glucose-ecific phohotransferase enzyme IIA component | 3  |                | VGDPVIEFDLPLEEK       | 115 | 16 | 17 | 99.49  | b2b4b5°b5b6b7°b7b10y2y4y6y9y10°y10y11°y11y16                            | 1812.97 | 99.818  | 140839 | 2 | 906.99 | 1.75   |
| P0A283 PTGA_SALTY Glucose-ecific phohotransferase enzyme IIA component | 4  |                | STLTPVVISNMDEIK       | 133 | 15 | 5  | 17.98  | b1b13y5°y5y11                                                           | 1646.89 | 73.028  | 13161  | 2 | 823.95 | 12.45  |

|                                                                        |    |                      |                                            |     |    |    |        |                                                          |         |         |        |   |         |        |
|------------------------------------------------------------------------|----|----------------------|--------------------------------------------|-----|----|----|--------|----------------------------------------------------------|---------|---------|--------|---|---------|--------|
| P0A283 PTGA_SALTY Glucose-ecific phohotransferase enzyme IIA component | 5  |                      | DTGTIEIVAPLSGEIVNIEDVPDVV<br>FAEK          | 16  | 29 | 4  | 11.47  | b3b7y2y11                                                | 3069.59 | 111.982 | 3662   | 3 | 1023.87 | -0.40  |
| P0A283 PTGA_SALTY Glucose-ecific phohotransferase enzyme IIA component | 6  |                      | IVGDGIAIKPTGNK                             | 45  | 14 | 12 | 109.42 | b5y3y4°y4y5°y5*y5y6y7y9<br>y10y13                        | 1382.78 | 43.558  | 257111 | 3 | 461.60  | -17.30 |
| P0A283 PTGA_SALTY Glucose-ecific phohotransferase enzyme IIA component | 7  |                      | IFETNHAFSIESDSGIELFVHFGIDT<br>VELK         | 70  | 30 | 3  | 17.23  | b10b12b15                                                | 3394.76 | 126.829 | 2919   | 3 | 1132.26 | 21.58  |
| P0A283 PTGA_SALTY Glucose-ecific phohotransferase enzyme IIA component | 8  |                      | VKVGDPVIEFDLPLEEK                          | 113 | 18 | 6  | 30.68  | b5b11y3°y3y6y10                                          | 2040.11 | 96.367  | 151992 | 3 | 680.71  | -9.99  |
| P06202 OPPA_SALTY Periplasmic oligopeptide-binding protein             | 1  |                      | LADPNTASPYASYLQYGHIANIDD<br>IIAGKKPATDLGVK | 125 | 38 | 11 | 38.28  | b3b6°b6b8b10b21y1y3y4y<br>8y38                           | 4001.02 | 83.717  | 170679 | 5 | 801.01  | -11.35 |
| P06202 OPPA_SALTY Periplasmic oligopeptide-binding protein             | 2  |                      | AEQQLDKDSAIVPVYYYVNAR                      | 494 | 21 | 19 | 127.92 | b1b3b4b6b10b11°b11b12°<br>b12y1y3y4*y4y5y6y7y9y1<br>0y21 | 2442.23 | 73.071  | 102368 | 3 | 814.75  | 0.70   |
| P06202 OPPA_SALTY Periplasmic oligopeptide-binding protein             | 3  |                      | WSDGTPVTAHDFVYSWQR                         | 107 | 18 | 10 | 34.35  | b2b11y1y4y6y7°y7*y7y13y<br>18                            | 2151.99 | 72.963  | 80648  | 3 | 718.00  | 2.84   |
| P06202 OPPA_SALTY Periplasmic oligopeptide-binding protein             | 4  | Carbamidomethyl+C(4) | AGWCADYNEPTSFLNTMLSDSSN<br>NTAHYK          | 439 | 29 | 7  | 51.08  | y6y7y13y14y15y20y29                                      | 3294.42 | 90.326  | 79196  | 3 | 1098.81 | 3.63   |
| P06202 OPPA_SALTY Periplasmic oligopeptide-binding protein             | 5  |                      | LVEPEWFK                                   | 352 | 8  | 4  | 32.88  | b6y5y6y8                                                 | 1047.54 | 71.239  | 68315  | 2 | 524.28  | -6.76  |
| P06202 OPPA_SALTY Periplasmic oligopeptide-binding protein             | 6  |                      | SGEIDMTYNNMPIELFQK                         | 263 | 18 | 12 | 28.93  | b1b2b3°b3b13y2y10y11°y1<br>1*y11y13°y18                  | 2130.02 | 86.588  | 51857  | 2 | 1065.51 | 13.75  |
| P06202 OPPA_SALTY Periplasmic oligopeptide-binding protein             | 7  |                      | TVINQVTYLPISSEVTDVNR                       | 241 | 20 | 10 | 98.21  | y3y5y6y9y11y12y13y14y1<br>5y20                           | 2248.20 | 76.975  | 51354  | 2 | 1124.60 | 7.49   |
| P06202 OPPA_SALTY Periplasmic oligopeptide-binding protein             | 8  |                      | NQGDLPAYSYTPPYTDGAK                        | 333 | 19 | 9  | 49.6   | b7b8b11y2y8y9y11y14y19                                   | 2057.96 | 58.650  | 49487  | 2 | 1029.48 | 7.47   |
| P06202 OPPA_SALTY Periplasmic oligopeptide-binding protein             | 9  |                      | NLGVNVNLENQEWK                             | 410 | 14 | 13 | 79.29  | b2*b2b4b7b11b12y1y6y8y<br>10*y10y12y14                   | 1656.84 | 66.712  | 40350  | 2 | 828.92  | 4.35   |
| P06202 OPPA_SALTY Periplasmic oligopeptide-binding protein             | 10 |                      | LADPNTASPYASYLQYGHIANIDD<br>IIAGK          | 125 | 29 | 6  | 11.47  | b2b3b9°b9y1y15                                           | 3091.54 | 88.411  | 22003  | 3 | 1031.18 | 0.71   |
| P06202 OPPA_SALTY Periplasmic oligopeptide-binding protein             | 11 |                      | WTQPANIVTNGAYK                             | 204 | 14 | 4  | 27.69  | b3b6b13*b13                                              | 1562.80 | 73.992  | 4907   | 3 | 521.61  | 5.55   |
| P06202 OPPA_SALTY Periplasmic oligopeptide-binding protein             | 12 |                      | WENKDFK                                    | 89  | 7  | 3  | 40.25  | y3y4y6                                                   | 966.45  | 44.502  | 1548   | 3 | 322.82  | -13.64 |
| P06202 OPPA_SALTY Periplasmic oligopeptide-binding protein             | 13 |                      | TFLDTR                                     | 424 | 6  | 1  | 13.55  | y4                                                       | 752.39  | 44.015  | 14875  | 1 | 752.39  | -4.30  |
| P06202 OPPA_SALTY Periplasmic oligopeptide-binding protein             | 14 |                      | DLFEGLLISDVEGHPSPGVAEK                     | 67  | 22 | 4  | 19.84  | b3b10°b10b14                                             | 2309.13 | 82.891  | 5744   | 3 | 770.38  | -17.55 |
| P06202 OPPA_SALTY Periplasmic oligopeptide-binding protein             | 15 |                      | DSAIVPVYYYVNAR                             | 501 | 14 | 4  | 31.28  | b4b6b8y8                                                 | 1629.81 | 104.543 | 4768   | 2 | 815.41  | -8.46  |

|                                                             |    |                       |                                 |     |    |    |        |                                             |         |         |        |   |         |        |
|-------------------------------------------------------------|----|-----------------------|---------------------------------|-----|----|----|--------|---------------------------------------------|---------|---------|--------|---|---------|--------|
| [P06202]OPPA_SALTY Periplasmic oligopeptide-binding protein | 16 | Carbamidomethyl+C(13) | EIPNEVRVDPYLCTYYYEINNQK         | 284 | 23 | 8  | 29.21  | b4°b4b6°b6b11b13y7*y7                       | 2920.39 | 76.267  | 31041  | 3 | 974.14  | 4.10   |
| [P06202]OPPA_SALTY Periplasmic oligopeptide-binding protein | 17 |                       | NPQYWDNAKTVINQVTYLPISSSEV TDVNR | 232 | 29 | 3  | 11.47  | b4b12y7                                     | 3364.69 | 102.671 | 26617  | 3 | 1122.24 | 3.77   |
| [P06202]OPPA_SALTY Periplasmic oligopeptide-binding protein | 18 |                       | FGDKWTQPANIVTNGAYK              | 200 | 18 | 4  | 38.37  | b5b6b7b10                                   | 2010.01 | 64.751  | 19757  | 3 | 670.67  | 0.61   |
| [P06202]OPPA_SALTY Periplasmic oligopeptide-binding protein | 19 |                       | VADDTQRSELYAK                   | 481 | 13 | 4  | 29.41  | b3b10y4y8                                   | 1495.73 | 30.694  | 19253  | 3 | 499.25  | -7.92  |
| [P06202]OPPA_SALTY Periplasmic oligopeptide-binding protein | 20 |                       | VKNQGDLPAYSYTPPYTDGAK           | 331 | 21 | 4  | 48.01  | y5y6y7y8                                    | 2285.13 | 54.799  | 13541  | 3 | 762.38  | 8.23   |
| [P06202]OPPA_SALTY Periplasmic oligopeptide-binding protein | 21 | Carbamidomethyl+C(6)  | VDPYLCTYYYEINNQKAPFNDVR         | 291 | 23 | 7  | 26.33  | b5°b5b9y6*y6y7°y7                           | 2882.35 | 76.356  | 12707  | 3 | 961.45  | 1.44   |
| [P06202]OPPA_SALTY Periplasmic oligopeptide-binding protein | 22 |                       | IVLERNPQYWDNAK                  | 227 | 14 | 5  | 30.49  | b12*b12y8y10y11                             | 1745.92 | 87.848  | 7348   | 2 | 873.46  | 11.40  |
| [P06202]OPPA_SALTY Periplasmic oligopeptide-binding protein | 23 |                       | SELYAKAEQQLDK                   | 488 | 13 | 4  | 20.46  | b9°b9b11y10                                 | 1522.77 | 68.226  | 5596   | 2 | 761.89  | -5.53  |
| [P02910]HISJ_SALTY Histidine-binding periplasmic protein    | 1  |                       | VGVLQGTQTETFGNEHWAPK            | 135 | 20 | 11 | 59.75  | b2b3b4y2y10y11y13y16*y16y17y20              | 2199.08 | 63.638  | 144987 | 3 | 733.70  | -2.78  |
| [P02910]HISJ_SALTY Histidine-binding periplasmic protein    | 2  |                       | IGTDPTYAPFESK                   | 29  | 13 | 13 | 137.84 | b4b8b10y4y5y6y7y9°y9y10y11y12y13            | 1425.69 | 55.016  | 126954 | 2 | 713.35  | 0.60   |
| [P02910]HISJ_SALTY Histidine-binding periplasmic protein    | 3  |                       | NSDIQPTVASLK                    | 120 | 12 | 17 | 136.64 | b2°b2*b2b3°b3b4b6b10y3y4y7y8°*y8y9y10y11y12 | 1272.68 | 47.886  | 105379 | 2 | 636.84  | -0.86  |
| [P02910]HISJ_SALTY Histidine-binding periplasmic protein    | 4  | Carbamidomethyl+C(5)  | INTQCTFVENPLDALIPSLK            | 62  | 20 | 10 | 44.22  | b2*b2b5b9y2y4y5y6y14y20                     | 2273.20 | 104.195 | 62924  | 2 | 1137.10 | 7.73   |
| [P02910]HISJ_SALTY Histidine-binding periplasmic protein    | 5  |                       | FGGPAVKDEK                      | 201 | 10 | 6  | 52.2   | b2b6b9y4y5y8                                | 1047.54 | 27.164  | 22475  | 2 | 524.27  | -6.06  |
| [P02910]HISJ_SALTY Histidine-binding periplasmic protein    | 6  |                       | AFAEMR                          | 234 | 6  | 1  | 13.55  | b3                                          | 724.35  | 36.441  | 6261   | 1 | 724.35  | 0.84   |
| [P02910]HISJ_SALTY Histidine-binding periplasmic protein    | 7  | Carbamidomethyl+C(5)  | INTQCTFVENPLDALIPSLKAK          | 62  | 22 | 5  | 20.68  | b3b11b14y20*y20                             | 2472.32 | 98.986  | 147773 | 3 | 824.78  | 1.38   |
| [P02910]HISJ_SALTY Histidine-binding periplasmic protein    | 8  |                       | DEKLFGVGTGMGLR                  | 208 | 14 | 7  | 42.08  | b5b8°b8b10°b10b11y8                         | 1479.74 | 58.903  | 6132   | 2 | 740.37  | -14.35 |
| [P02910]HISJ_SALTY Histidine-binding periplasmic protein    | 9  | Phosphoryl STY(14)    | GIEIVSYQGQDNIYSDLTAGR           | 155 | 21 | 3  | 13.75  | b10y7y9                                     | 2379.11 | 94.077  | 41488  | 3 | 793.71  | 14.78  |
| [P64052]EFTS_SALTY Elongation factor Ts                     | 1  |                       | VASLEGDVLGSYQHGAR               | 134 | 17 | 14 | 113.93 | b2b6°b6b8b10y4y5y7y8y10y11y12y13y17         | 1758.86 | 59.110  | 151188 | 3 | 586.96  | -11.04 |
| [P64052]EFTS_SALTY Elongation factor Ts                     | 2  |                       | ITDVEVLK                        | 104 | 8  | 7  | 32.88  | b3°b3y1y2y6y7y8                             | 916.53  | 48.583  | 136362 | 2 | 458.77  | -9.92  |
| [P64052]EFTS_SALTY Elongation factor Ts                     | 3  |                       | AEITASLVK                       | 1   | 9  | 6  | 45.18  | b4y1y3y5y6y9                                | 931.54  | 48.692  | 98418  | 2 | 466.27  | -7.53  |
| [P64052]EFTS_SALTY Elongation factor Ts                     | 4  |                       | IGENINIR                        | 125 | 8  | 6  | 53.8   | y3y4y5y7*y7y8                               | 928.51  | 44.483  | 96748  | 2 | 464.76  | -8.02  |
| [P64052]EFTS_SALTY Elongation factor Ts                     | 5  |                       | FTGEVSLTGQPFVMEPSK              | 222 | 18 | 7  | 52.05  | b5y3y5y8y10y13y18                           | 1953.98 | 74.605  | 77420  | 2 | 977.49  | 8.12   |
| [P64052]EFTS_SALTY Elongation factor Ts                     | 6  |                       | IGVLVAAK                        | 151 | 8  | 9  | 62.17  | b2b3y1y2y3y5y6y7y8                          | 770.50  | 47.317  | 57590  | 2 | 385.76  | -12.75 |
| [P64052]EFTS_SALTY Elongation factor Ts                     | 7  | Carbamidomethyl+C(8)  | TGAGMMDCKK                      | 15  | 10 | 7  | 73.91  | b3y1y4y5y6y7y8                              | 1098.47 | 21.177  | 38209  | 2 | 549.74  | -1.33  |
| [P64052]EFTS_SALTY Elongation factor Ts                     | 8  |                       | ALTEANGDIELAIENMRK              | 25  | 18 | 9  | 49.6   | b7b11b14y4*y4y5*y5y7y14                     | 1988.01 | 74.332  | 36017  | 3 | 663.34  | -2.58  |

|                                             |    |                       |                                    |     |    |    |        |                                                 |         |         |        |   |         |        |
|---------------------------------------------|----|-----------------------|------------------------------------|-----|----|----|--------|-------------------------------------------------|---------|---------|--------|---|---------|--------|
| P64052 EFTS_SALTY Elongation factor Ts      | 9  |                       | AGNVAADGVIK                        | 52  | 11 | 10 | 73.53  | b1b6y2y4y6y7y8y10*y10y11                        | 1014.55 | 36.602  | 21876  | 2 | 507.78  | -7.16  |
| P64052 EFTS_SALTY Elongation factor Ts      | 10 |                       | VALVAK                             | 119 | 6  | 1  | 13.55  | b3                                              | 600.41  | 41.512  | 9620   | 1 | 600.41  | -4.68  |
| P64052 EFTS_SALTY Elongation factor Ts      | 11 |                       | QLAMHVAASKPEFVKPEDVSADVVEK         | 167 | 26 | 8  | 40.59  | b4b5*b5y3y4y8y11°y11                            | 2824.45 | 110.768 | 3030   | 3 | 942.16  | -0.52  |
| P64052 EFTS_SALTY Elongation factor Ts      | 12 | Carbamidomethyl+C(13) | IDGNVAFILEVNCQTDVFAK               | 65  | 20 | 3  | 14.24  | b3y5y10                                         | 2253.11 | 107.407 | 2277   | 3 | 751.71  | -5.53  |
| P64052 EFTS_SALTY Elongation factor Ts      | 13 |                       | DAGFQAFADKVLDAAVAGK                | 85  | 19 | 4  | 23.44  | b3y3y6y8                                        | 1893.96 | 100.077 | 96574  | 3 | 631.99  | -6.12  |
| P64052 EFTS_SALTY Elongation factor Ts      | 14 |                       | FEVGEGIEKVETDFAAEVAAMSK            | 258 | 23 | 4  | 12.94  | b8y3y14°y14                                     | 2457.18 | 109.880 | 3372   | 3 | 819.73  | -2.98  |
| P64052 EFTS_SALTY Elongation factor Ts      | 15 |                       | EIAEKMVEGR                         | 209 | 10 | 3  | 28.47  | b4b5y4                                          | 1161.58 | 21.431  | 1614   | 2 | 581.29  | -10.82 |
| P64052 EFTS_SALTY Elongation factor Ts      | 16 | Oxidation+M(16)       | ALTEANGDIELAIENMRK                 | 25  | 18 | 3  | 15.44  | b5b9y12                                         | 2004.01 | 71.988  | 5408   | 2 | 1002.51 | 4.08   |
| P64052 EFTS_SALTY Elongation factor Ts      | 17 |                       | GVLVAAK                            | 152 | 7  | 0  | 1.23   |                                                 | 657.43  | 47.358  | 21183  | 1 | 657.43  | -3.81  |
| P64052 EFTS_SALTY Elongation factor Ts      | 18 | Carbamidomethyl+C(7)  | GAGMMDCKK                          | 16  | 9  | 0  | 2.06   |                                                 | 997.43  | 21.135  | 10986  | 2 | 499.22  | -0.37  |
| P0A297 RL10_SALTY 50S ribosomal protein L10 | 1  |                       | LATLPTYEEAIAR                      | 125 | 13 | 13 | 105.33 | b2b3°b3b9y5y6y7y8y9°y9y11y12y13                 | 1447.78 | 64.939  | 116187 | 2 | 724.39  | 1.26   |
| P0A297 RL10_SALTY 50S ribosomal protein L10 | 2  |                       | AAAFEGELIPASQIDR                   | 109 | 16 | 18 | 146.12 | b5b8b9b13°b13b15y2y3°y3y5y7y8y9y11y12y13*y13y16 | 1687.87 | 68.546  | 80003  | 2 | 844.44  | 4.48   |
| P0A297 RL10_SALTY 50S ribosomal protein L10 | 3  | Carbamidomethyl+C(9)  | VVEGTQFECLKDTFVGPTLIAYSM EHPGAAAR  | 62  | 32 | 12 | 58.26  | b2b3b4b12b24y6y7y10y12y13y16y32                 | 3494.68 | 92.576  | 61150  | 4 | 874.43  | -7.61  |
| P0A297 RL10_SALTY 50S ribosomal protein L10 | 4  |                       | GALSAVVADSR                        | 20  | 11 | 9  | 100.61 | b5b6y2y3y4y5y6y7y8                              | 1045.56 | 48.635  | 41232  | 2 | 523.28  | -2.22  |
| P0A297 RL10_SALTY 50S ribosomal protein L10 | 5  |                       | DTFVGPTLIAYSM EHPGAAAR             | 73  | 21 | 8  | 34.92  | b6b7°b7y1y8y12y14y21                            | 2204.11 | 116.358 | 10738  | 3 | 735.38  | 14.62  |
| P0A297 RL10_SALTY 50S ribosomal protein L10 | 6  |                       | LATLPTYEEAIARL MATMK               | 125 | 19 | 3  | 14.8   | b12y3y6                                         | 2123.10 | 57.688  | 114583 | 3 | 708.37  | -12.65 |
| P0A297 RL10_SALTY 50S ribosomal protein L10 | 7  |                       | AAAFEGELIPASQIDRLATLPTYEEAIAR      | 109 | 29 | 4  | 14.38  | b4b15y7y11                                      | 3116.62 | 93.154  | 13245  | 3 | 1039.54 | -3.60  |
| P0A297 RL10_SALTY 50S ribosomal protein L10 | 8  |                       | AGREAGVYMR                         | 43  | 10 | 5  | 59.98  | b5b9y3y6y8                                      | 1109.54 | 87.825  | 2899   | 1 | 1109.54 | -7.70  |
| P0A297 RL10_SALTY 50S ribosomal protein L10 | 9  | Phosphoryl STY(4)     | GALSAVVADSR                        | 20  | 11 | 3  | 24.11  | b3b8y6                                          | 1125.51 | 40.217  | 14258  | 2 | 563.26  | -6.40  |
| P0A297 RL10_SALTY 50S ribosomal protein L10 | 10 |                       | DTFVGPTLIAYSM EHPGAAAR             | 73  | 21 | 0  | 6.58   |                                                 | 2186.08 | 116.339 | 2731   | 2 | 1093.55 | 8.71   |
| P0A1Z2 SKP_SALTY Chaperone protein skp      | 1  |                       | IAIVNMGNLFQQVAQK                   | 23  | 16 | 15 | 92.89  | b2b3b4b8b15y1y2y3y6y7y11y12y13*y13y16           | 1773.97 | 90.122  | 168190 | 2 | 887.49  | 1.58   |
| P0A1Z2 SKP_SALTY Chaperone protein skp      | 2  |                       | TGVSNTLENEFK                       | 39  | 12 | 10 | 81.73  | y2y4y5y6y7y9°y9y11*y11y12                       | 1338.65 | 57.897  | 147762 | 2 | 669.83  | -1.46  |
| P0A1Z2 SKP_SALTY Chaperone protein skp      | 3  |                       | METDLQSK                           | 59  | 8  | 6  | 40.66  | b8y2y4y5y6y8                                    | 951.44  | 26.505  | 145527 | 2 | 476.22  | -7.95  |
| P0A1Z2 SKP_SALTY Chaperone protein skp      | 4  |                       | VANDQSIDLVDANTVAYNSSDV K DITADV LK | 126 | 32 | 12 | 62.14  | b1b4b5b6b7°b7b9b10b13°y1y2y3                    | 3392.71 | 90.056  | 55339  | 3 | 1131.58 | 1.44   |
| P0A1Z2 SKP_SALTY Chaperone protein skp      | 5  |                       | VANDQSIDLVDANTVAYNSSDV K           | 126 | 24 | 4  | 12.61  | b4b12y5°y5                                      | 2537.25 | 84.969  | 44700  | 3 | 846.42  | 5.10   |
| P0A1Z2 SKP_SALTY Chaperone protein skp      | 6  |                       | AQAFEKDR                           | 97  | 8  | 8  | 53.8   | y2°y2y3y4y5y6°y6y8                              | 964.48  | 17.307  | 9525   | 2 | 482.74  | -4.75  |
| P0A1Z2 SKP_SALTY Chaperone protein skp      | 7  |                       | WLLAAGLGLAMVTSAQAADK               | 3   | 20 | 3  | 21.03  | y5y10y16                                        | 1987.04 | 121.948 | 3241   | 2 | 994.03  | -12.41 |
| P0A1Z2 SKP_SALTY Chaperone protein skp      | 8  |                       | TGVSNTLENEFKGR                     | 39  | 14 | 6  | 31.28  | b6°b6b8b13y10°y10                               | 1551.76 | 68.076  | 34373  | 2 | 776.38  | -11.25 |

|                                             |    |                      |                              |     |    |    |        |                                                           |         |         |        |   |         |        |
|---------------------------------------------|----|----------------------|------------------------------|-----|----|----|--------|-----------------------------------------------------------|---------|---------|--------|---|---------|--------|
| P0A1Z2 SKP_SALTY Chaperone protein skp      | 9  |                      | AQAFEKDR                     | 97  | 8  | 4  | 49.03  | b3y4y5y6                                                  | 964.48  | 18.322  | 14808  | 2 | 482.74  | -3.29  |
| P0A1Z2 SKP_SALTY Chaperone protein skp      | 10 |                      | KVANDQSIDLVDANTVAYNSSD VK    | 125 | 25 | 6  | 12.31  | b5°b5*b5b9°b9y7                                           | 2665.33 | 136.146 | 3426   | 3 | 889.12  | 1.19   |
| P0A1Z2 SKP_SALTY Chaperone protein skp      | 11 | Oxidation+M(11)      | WLLAAGLGLAMVTSQAADK          | 3   | 20 | 4  | 21.03  | y3y6*y6y8                                                 | 2003.07 | 81.586  | 16369  | 2 | 1002.04 | 5.42   |
| Q7CPE2 ATPB_SALTY ATP synthase subunit beta | 1  |                      | QLDPLVVGQEHYDTAR             | 343 | 16 | 10 | 118.02 | b2y3y4y5y6y8y9y11y12y14                                   | 1840.90 | 57.893  | 57683  | 3 | 614.31  | -8.02  |
| Q7CPE2 ATPB_SALTY ATP synthase subunit beta | 2  | Carbamidomethyl+C(6) | VIDLMCPFAK                   | 132 | 10 | 6  | 42.86  | b9y5y6y7y8°y10                                            | 1193.60 | 80.978  | 46517  | 2 | 597.30  | -7.16  |
| Q7CPE2 ATPB_SALTY ATP synthase subunit beta | 3  |                      | VALTGLTMAEK                  | 219 | 11 | 11 | 112.96 | b2b5y3y4y5y6y7y8y9y10y11                                  | 1133.62 | 59.041  | 46471  | 2 | 567.31  | -3.23  |
| Q7CPE2 ATPB_SALTY ATP synthase subunit beta | 4  |                      | MPSAVGYQPTLAEEMGVLQER        | 261 | 21 | 9  | 29.48  | b8b14b21y3°y3*y3y4y6y21                                   | 2306.13 | 81.478  | 35932  | 2 | 1153.57 | 8.26   |
| Q7CPE2 ATPB_SALTY ATP synthase subunit beta | 5  |                      | TVNMMELIR                    | 156 | 9  | 9  | 45.18  | b3b9*b9y3y6°y6y7*y7y9                                     | 1106.57 | 76.354  | 35006  | 2 | 553.79  | -1.32  |
| Q7CPE2 ATPB_SALTY ATP synthase subunit beta | 6  |                      | FLSQPFFVAEFTGSPGK            | 399 | 18 | 6  | 44.03  | y3y6y7y9y11y18                                            | 1958.01 | 100.266 | 34574  | 2 | 979.51  | 1.25   |
| Q7CPE2 ATPB_SALTY ATP synthase subunit beta | 7  |                      | AAPSYEELSNSQELLETGK          | 112 | 20 | 7  | 37.53  | b2y1y12y13y14y18y20                                       | 2179.09 | 73.440  | 29730  | 2 | 1090.05 | 6.95   |
| Q7CPE2 ATPB_SALTY ATP synthase subunit beta | 8  |                      | QIASLGIYPAVDPLDSTSR          | 324 | 19 | 13 | 74.16  | b2*b2b3y1y4y5y6°y6y7y11y12y14y19                          | 2003.05 | 80.304  | 27954  | 2 | 1002.03 | 4.57   |
| Q7CPE2 ATPB_SALTY ATP synthase subunit beta | 9  |                      | VGLFGGAGVGK                  | 145 | 11 | 3  | 24.11  | b3y4y7                                                    | 961.54  | 58.986  | 27550  | 2 | 481.27  | -9.01  |
| Q7CPE2 ATPB_SALTY ATP synthase subunit beta | 10 |                      | NIAIEHSGYSVFAGVGER           | 165 | 18 | 4  | 26.36  | b12b13b16y3                                               | 1905.96 | 66.654  | 1909   | 2 | 953.48  | 8.20   |
| Q7CPE2 ATPB_SALTY ATP synthase subunit beta | 11 |                      | GIMEGEYDHLPEQAFYMVGSIDE AVEK | 429 | 27 | 3  | 11.83  | b4b10y5                                                   | 3057.44 | 92.676  | 32061  | 3 | 1019.82 | 18.45  |
| Q7CPE2 ATPB_SALTY ATP synthase subunit beta | 12 |                      | YQELK                        | 367 | 5  | 2  | 13.14  | b3*b3                                                     | 680.36  | 30.925  | 6726   | 1 | 680.36  | -5.74  |
| Q7CPE2 ATPB_SALTY ATP synthase subunit beta | 13 |                      | TIAMGSSDGLR                  | 53  | 11 | 4  | 24.11  | b5°b5b10y10                                               | 1107.55 | 80.910  | 2111   | 1 | 1107.55 | 0.00   |
| Q7CPE2 ATPB_SALTY ATP synthase subunit beta | 14 |                      | DEGRDVLLFVDNIYR              | 232 | 15 | 5  | 29.2   | b8°b8b13b14y7                                             | 1823.95 | 99.876  | 290037 | 2 | 912.48  | 11.91  |
| Q7CPE2 ATPB_SALTY ATP synthase subunit beta | 15 |                      | WAIHRAAPSYEELSNSQELLETK      | 107 | 25 | 3  | 12.31  | b3b11y4                                                   | 2842.42 | 83.614  | 6499   | 3 | 948.15  | -5.67  |
| Q7CPE2 ATPB_SALTY ATP synthase subunit beta | 16 |                      | VSLVYQGMNEPPGNRLR            | 202 | 17 | 5  | 27.17  | b10y11°y11y12y14                                          | 1929.99 | 103.572 | 4615   | 3 | 644.00  | -5.63  |
| Q7CPE2 ATPB_SALTY ATP synthase subunit beta | 17 |                      | IMNVLGEPVDMKGEIGEEER         | 87  | 20 | 5  | 19.56  | b3b14*b14y8y10                                            | 2245.08 | 93.091  | 2482   | 3 | 749.03  | -2.50  |
| Q7CPE2 ATPB_SALTY ATP synthase subunit beta | 18 | Phosphoryl STY(8)    | QIASLGIYPAVDPLDSTSR          | 324 | 19 | 5  | 23.44  | b9y4y6y11°y11                                             | 2083.03 | 47.387  | 1916   | 2 | 1042.02 | 14.30  |
| O54297 RS4_SALTY 30S ribosomal protein S4   | 1  |                      | VVNIASYQVSPNDVVSIR           | 128 | 18 | 20 | 145.89 | b3b9°b9*b9b10b12b14*b14b15°b15b17y3y4y5y9y12y13y14*y14y18 | 1960.06 | 71.990  | 71590  | 2 | 980.53  | 4.61   |
| O54297 RS4_SALTY 30S ribosomal protein S4   | 2  |                      | AALELAEQR                    | 156 | 9  | 14 | 87.61  | b3y1y2*y2y3y4y5y6°y6*y6y7y8°y8y9                          | 1000.54 | 43.221  | 70045  | 2 | 500.77  | -2.75  |
| O54297 RS4_SALTY 30S ribosomal protein S4   | 3  |                      | KPER                         | 184 | 4  | 1  | 12.73  | y3                                                        | 529.31  | 45.110  | 20752  | 1 | 529.31  | -5.42  |
| O54297 RS4_SALTY 30S ribosomal protein S4   | 4  |                      | GNTGENLLALLEGR               | 83  | 14 | 4  | 31.28  | b5b7b10y11                                                | 1456.77 | 95.048  | 6259   | 2 | 728.89  | -6.87  |
| O54297 RS4_SALTY 30S ribosomal protein S4   | 5  |                      | IEQAPGQHGAR                  | 33  | 11 | 5  | 50.26  | y5*y5y6y7y8                                               | 1163.57 | 15.762  | 3309   | 3 | 388.53  | -16.47 |
| O54297 RS4_SALTY 30S ribosomal protein S4   | 6  | Carbamidomethyl+C(1) | CKIEQAPGQHGAR                | 31  | 13 | 3  | 27.94  | y6y11y12                                                  | 1451.72 | 68.811  | 20305  | 2 | 726.36  | -0.50  |
| O54297 RS4_SALTY 30S ribosomal protein S4   | 7  | Phosphoryl STY(4)    | SDLSADINEHLIVELYSK           | 188 | 18 | 5  | 15.44  | b3_H3PO4 b3°b3y3°y3y14                                    | 2126.01 | 136.285 | 2062   | 2 | 1063.51 | 6.66   |

|                                           |    |                       |                                  |     |    |    |        |                                                                     |         |         |        |   |         |        |
|-------------------------------------------|----|-----------------------|----------------------------------|-----|----|----|--------|---------------------------------------------------------------------|---------|---------|--------|---|---------|--------|
| P0A7W4 RS5_SALTY 30S ribosomal protein S5 | 1  |                       | VFMQPASEGTGIIAGGAMR              | 93  | 19 | 24 | 185.14 | b1b2b3b4b6b10b11b12b13°b13b14y2y4y5y6y7y11y12y13y15°y15y16*y16y19   | 1892.94 | 67.945  | 176279 | 2 | 946.98  | 3.93   |
| P0A7W4 RS5_SALTY 30S ribosomal protein S5 | 2  |                       | AVLEVAGVHNVLAK                   | 112 | 14 | 6  | 27.69  | b2y1y3y6y12y14                                                      | 1419.83 | 61.084  | 158511 | 2 | 710.42  | -2.32  |
| P0A7W4 RS5_SALTY 30S ribosomal protein S5 | 3  |                       | AYGSTNPINVVRR                    | 126 | 12 | 15 | 105.13 | b1b2b3b6°b6b7y2y4*y4y6y7y8y9y10y12                                  | 1290.68 | 50.990  | 134206 | 2 | 645.84  | -1.04  |
| P0A7W4 RS5_SALTY 30S ribosomal protein S5 | 4  |                       | ATIDGLENMNSPEMVA AK              | 138 | 18 | 24 | 144.52 | b2b5°b5b8°b8°b8b11b14°b14b15°b15°b15y2y3y4y5y6y7y10*y10y11y12y14y18 | 1890.90 | 63.007  | 88977  | 2 | 945.96  | 5.23   |
| P0A7W4 RS5_SALTY 30S ribosomal protein S5 | 5  |                       | ATIDGLENMNSPEMVA AKR             | 138 | 19 | 12 | 107.93 | b4y1y3y4y8y9°y9y10y11y12y16y17                                      | 2046.99 | 58.840  | 78609  | 3 | 683.00  | -3.46  |
| P0A7W4 RS5_SALTY 30S ribosomal protein S5 | 6  |                       | IFSFTALTTVVGDN GR                | 29  | 16 | 6  | 34.84  | b2y1y6y8y9y12                                                       | 1653.86 | 86.597  | 35536  | 2 | 827.43  | -0.44  |
| P0A7W4 RS5_SALTY 30S ribosomal protein S5 | 7  |                       | NMINVALNNGTLQHPVK                | 69  | 17 | 3  | 24.82  | b3b4b6                                                              | 1862.97 | 63.267  | 8388   | 3 | 621.66  | -11.86 |
| P0A7W4 RS5_SALTY 30S ribosomal protein S5 | 8  |                       | SVEEILGK                         | 159 | 8  | 4  | 35.89  | b5°b5y3y6                                                           | 874.48  | 50.350  | 61054  | 2 | 437.74  | -10.33 |
| P0A7W4 RS5_SALTY 30S ribosomal protein S5 | 9  |                       | VGFGYGK                          | 45  | 7  | 3  | 40.25  | b6y4y6                                                              | 727.37  | 39.880  | 22342  | 2 | 364.19  | -11.50 |
| P0A7W4 RS5_SALTY 30S ribosomal protein S5 | 10 |                       | LIAVNR                           | 14  | 6  | 3  | 26.69  | y4y5*y5                                                             | 685.43  | 32.969  | 15987  | 1 | 685.43  | -1.25  |
| P0A7W4 RS5_SALTY 30S ribosomal protein S5 | 11 |                       | MAHIEKQAGELQEK                   | 0   | 14 | 6  | 39.5   | b4b6°b6b10y6y8                                                      | 1611.79 | 54.701  | 11892  | 2 | 806.40  | -13.63 |
| P0A7W4 RS5_SALTY 30S ribosomal protein S5 | 12 |                       | AYGSTNPINVV RATIDGLENMNSPEMVA AK | 126 | 30 | 4  | 11.32  | b5y10y14°y14                                                        | 3162.54 | 77.938  | 3425   | 3 | 1054.85 | -5.71  |
| P0A7W4 RS5_SALTY 30S ribosomal protein S5 | 13 |                       | GVHTGSRVFMQPASEGTGIIAGGA MR      | 86  | 26 | 3  | 12.06  | b5b14y5                                                             | 2587.31 | 103.736 | 3302   | 3 | 863.11  | 7.93   |
| P0A1D3 CH60_SALTY 60 kDa chaperonin       | 1  |                       | ANDAAGDGTTTATVLAQSIITEGLK        | 80  | 25 | 18 | 143.93 | b2*b2b3b4b5b15°b15y2y3y4y5y6y7y8y9y10y11y25                         | 2418.24 | 92.080  | 191315 | 3 | 806.75  | -0.20  |
| P0A1D3 CH60_SALTY 60 kDa chaperonin       | 2  |                       | GYLSPYFINKPETGA VELESPFILLADKK   | 197 | 29 | 10 | 39.1   | b2b4b6b7b11°b11y2y25y26y29                                          | 3239.70 | 97.168  | 179998 | 4 | 810.68  | -6.48  |
| P0A1D3 CH60_SALTY 60 kDa chaperonin       | 3  |                       | EMPLVLEAVAK                      | 231 | 11 | 11 | 86.67  | b2°b2b3y2y3y4y5y6y7y8y11                                            | 1199.66 | 80.198  | 148798 | 2 | 600.34  | -5.09  |
| P0A1D3 CH60_SALTY 60 kDa chaperonin       | 4  |                       | QQIEEATSDYDREK                   | 350 | 14 | 14 | 91.51  | b3*b3b14y2°y2y3y4y5y7y8y9y10y14*y14                                 | 1711.76 | 33.493  | 91361  | 3 | 571.26  | -11.48 |
| P0A1D3 CH60_SALTY 60 kDa chaperonin       | 5  |                       | LAGGVAVIK                        | 371 | 9  | 9  | 75.72  | b3b4b5b6y1y2y7y8y9                                                  | 827.52  | 45.108  | 81898  | 2 | 414.27  | -12.24 |
| P0A1D3 CH60_SALTY 60 kDa chaperonin       | 6  | Carbamidomethyl+C(6)  | QIVLNCGEEPSVVANTVK               | 452 | 18 | 11 | 77.43  | b2b12°b12b13y3y5y12y13y14y15y18                                     | 1957.01 | 61.373  | 77695  | 2 | 979.01  | 2.74   |
| P0A1D3 CH60_SALTY 60 kDa chaperonin       | 7  |                       | GVNVLADAVK                       | 18  | 10 | 11 | 73.91  | b2b4°b4y1y3y4y5y6y8*y8y10                                           | 985.56  | 56.175  | 65800  | 2 | 493.28  | -8.92  |
| P0A1D3 CH60_SALTY 60 kDa chaperonin       | 8  | Carbamidomethyl+C(6)  | ALSVPCSDSK                       | 132 | 10 | 6  | 33.7   | b2y2y4y6y7y10                                                       | 1063.50 | 35.000  | 59983  | 2 | 532.26  | -3.79  |
| P0A1D3 CH60_SALTY 60 kDa chaperonin       | 9  |                       | VEDALHATR                        | 395 | 9  | 7  | 93.63  | b4b5b7b8y4y5y6                                                      | 1011.52 | 26.815  | 47710  | 2 | 506.26  | -1.87  |
| P0A1D3 CH60_SALTY 60 kDa chaperonin       | 10 |                       | AIAQVGTISANSDET VGK              | 142 | 18 | 8  | 49.04  | b3y2y4y9y10y13y14y18                                                | 1760.91 | 48.058  | 46491  | 2 | 880.96  | 4.02   |
| P0A1D3 CH60_SALTY 60 kDa chaperonin       | 11 |                       | SFGAPTITK                        | 42  | 9  | 8  | 59.57  | b2b3°b3b6y2y3y4y7                                                   | 921.50  | 44.884  | 46355  | 2 | 461.25  | -8.15  |
| P0A1D3 CH60_SALTY 60 kDa chaperonin       | 12 | Carbamidomethyl+C(18) | SALQYAASVAGLMITTECMVTDLPK        | 501 | 25 | 10 | 39.27  | b1b3°b3b10y9y10y12y14y20y25                                         | 2670.32 | 86.623  | 36323  | 2 | 1335.66 | 0.09   |
| P0A1D3 CH60_SALTY 60 kDa chaperonin       | 13 |                       | AVAAGMNPMDLK                     | 105 | 12 | 6  | 44.65  | y2y5y8y9y10y12                                                      | 1217.60 | 58.311  | 35532  | 2 | 609.30  | -1.60  |
| P0A1D3 CH60_SALTY 60 kDa chaperonin       | 14 |                       | AGKPLLIIAEDVEGEALATLVVNTMR       | 242 | 26 | 13 | 75.31  | b6b7y1y2y3y4°y4y5°y5*y5y6°y6y7                                      | 2723.50 | 136.374 | 26611  | 3 | 908.51  | -0.09  |

|                                       |    |                       |                                   |     |    |    |        |                                                                          |         |         |        |   |         |        |
|---------------------------------------|----|-----------------------|-----------------------------------|-----|----|----|--------|--------------------------------------------------------------------------|---------|---------|--------|---|---------|--------|
| P0A1D3 CH60_SALTY 60 kDa chaperonin   | 15 |                       | ATLEDLGQAKR                       | 311 | 11 | 4  | 50.26  | y5y6y7y8                                                                 | 1201.65 | 39.400  | 23299  | 2 | 601.33  | -0.61  |
| P0A1D3 CH60_SALTY 60 kDa chaperonin   | 16 |                       | AVAAGMNPMDLKR                     | 105 | 13 | 12 | 80.38  | b2y2y3y4y6y7y9*y9y11*y11*y11y13                                          | 1373.70 | 51.161  | 19863  | 2 | 687.35  | -2.49  |
| P0A1D3 CH60_SALTY 60 kDa chaperonin   | 17 |                       | GQNEQNVGK                         | 430 | 11 | 5  | 31.1   | b2y3y8y9y11                                                              | 1201.58 | 26.830  | 19365  | 2 | 601.30  | 2.24   |
| P0A1D3 CH60_SALTY 60 kDa chaperonin   | 18 |                       | DTTIIIDGVGEEAAIQGR                | 327 | 18 | 4  | 15.44  | b9b16y14*y14                                                             | 1845.91 | 99.876  | 70379  | 3 | 615.97  | -6.61  |
| P0A1D3 CH60_SALTY 60 kDa chaperonin   | 19 |                       | GGDGNYGYNAAATEEYGNMIDMGILDPTK     | 470 | 28 | 3  | 35.67  | y3y4y5                                                                   | 2966.29 | 88.310  | 39879  | 3 | 989.43  | 2.06   |
| P0A1D3 CH60_SALTY 60 kDa chaperonin   | 20 |                       | VTLGPK                            | 28  | 6  | 4  | 42.84  | b4*b4y3y5                                                                | 614.38  | 28.146  | 7916   | 1 | 614.38  | -3.87  |
| P0A1D3 CH60_SALTY 60 kDa chaperonin   | 21 |                       | AVAAAVEELK                        | 122 | 10 | 5  | 52.2   | b3b9y3y5y6                                                               | 1000.57 | 47.349  | 6751   | 1 | 1000.57 | 0.18   |
| P0A1D3 CH60_SALTY 60 kDa chaperonin   | 22 |                       | VGAATEVEMK                        | 380 | 10 | 3  | 33.7   | y6y7y9                                                                   | 1034.52 | 35.304  | 1898   | 1 | 1034.52 | 0.35   |
| P0A1D3 CH60_SALTY 60 kDa chaperonin   | 23 |                       | EIELEDKFENMGAQMVK                 | 58  | 17 | 7  | 42.37  | b5b10*b10y5y6y8y10                                                       | 2010.94 | 73.808  | 193101 | 3 | 670.99  | -3.04  |
| P0A1D3 CH60_SALTY 60 kDa chaperonin   | 24 |                       | IADLKGQNEQNVGK                    | 425 | 16 | 10 | 80.11  | b3b4y3y4y8*y8y11*y11y12y14                                               | 1741.89 | 40.200  | 144947 | 3 | 581.30  | -9.95  |
| P0A1D3 CH60_SALTY 60 kDa chaperonin   | 25 | Carbamidomethyl+C(16) | AVAAAVEELKALSVPSCDSK              | 122 | 20 | 6  | 33.17  | b8y6y8y11*y11y18                                                         | 2045.04 | 72.125  | 43902  | 3 | 682.35  | -6.63  |
| P0A1D3 CH60_SALTY 60 kDa chaperonin   | 26 | Carbamidomethyl+C(13) | AMEAPLRQIVLNCGEPSVVANTVK          | 445 | 25 | 5  | 27.83  | b3b7b8b10y13                                                             | 2725.40 | 74.174  | 21705  | 3 | 909.14  | 0.27   |
| P0A1D3 CH60_SALTY 60 kDa chaperonin   | 27 |                       | GIDKAVAAAVEELK                    | 118 | 14 | 3  | 26.89  | b3b11b12                                                                 | 1413.80 | 65.712  | 13502  | 2 | 707.40  | 1.30   |
| P0A1D3 CH60_SALTY 60 kDa chaperonin   | 28 |                       | VGAATEVEMKEK                      | 380 | 12 | 6  | 47.79  | b6*b6b7y5y8y9                                                            | 1291.67 | 76.375  | 2589   | 2 | 646.34  | 8.41   |
| P0A1D3 CH60_SALTY 60 kDa chaperonin   | 29 | Oxidation+M(22)       | EGVITVEDGTGLQDELDVVEGMQFDR        | 171 | 26 | 4  | 26.35  | b7b10b14b16                                                              | 2867.32 | 114.678 | 70755  | 3 | 956.45  | -0.43  |
| P0A1D3 CH60_SALTY 60 kDa chaperonin   | 30 | Oxidation+M(21)       | AMLQDIATLTGGTVISEIGMELEK          | 286 | 25 | 3  | 21.86  | b8y11y12                                                                 | 2665.29 | 92.683  | 6820   | 2 | 1333.15 | -14.66 |
| P0A1D3 CH60_SALTY 60 kDa chaperonin   | 31 |                       | EDALHATR                          | 396 | 8  | 0  | 1.65   |                                                                          | 912.45  | 26.753  | 38857  | 2 | 456.73  | -3.68  |
| P0A1D3 CH60_SALTY 60 kDa chaperonin   | 32 |                       | LEDLGQAKR                         | 313 | 9  | 0  | 2.47   |                                                                          | 1029.56 | 39.370  | 12260  | 2 | 515.28  | -13.04 |
| P0A1D3 CH60_SALTY 60 kDa chaperonin   | 33 |                       | NVLADAVK                          | 20  | 8  | 2  | 8.21   | b6*b6                                                                    | 829.48  | 56.108  | 8975   | 1 | 829.48  | 0.74   |
| P0A1D3 CH60_SALTY 60 kDa chaperonin   | 34 | Carbamidomethyl+C(18) | SALQYAASVAGLMITTECMVTDLP          | 501 | 24 | 1  | 8.36   | y12                                                                      | 2542.25 | 86.714  | 5542   | 3 | 848.09  | 11.52  |
| P0A1D3 CH60_SALTY 60 kDa chaperonin   | 35 |                       | GMNPMDLKR                         | 109 | 9  | 1  | 7.4    | b3                                                                       | 1061.54 | 51.104  | 4689   | 2 | 531.27  | 14.26  |
| P0A1D3 CH60_SALTY 60 kDa chaperonin   | 36 |                       | AGMNPMDLKR                        | 108 | 10 | 1  | 7.4    | b4                                                                       | 1132.56 | 51.125  | 4106   | 2 | 566.78  | -4.31  |
| P0A1D3 CH60_SALTY 60 kDa chaperonin   | 37 |                       | SALQYAASVAGLMIT                   | 501 | 15 | 0  | 8.23   |                                                                          | 1495.78 | 86.732  | 1704   | 2 | 748.40  | 0.33   |
| P0A1D3 CH60_SALTY 60 kDa chaperonin   | 38 |                       | QQIEEATSDYDREK                    | 350 | 14 | 0  | 3.7    |                                                                          | 1693.77 | 33.430  | 4857   | 3 | 565.26  | 2.67   |
| P25077 MDH_SALTY Malate dehydrogenase | 1  |                       | NQLPSGSELSLYDIAPVTPGVAVDLSHIPTAVK | 21  | 33 | 26 | 106.37 | b1b2*b2b3*b3b4b6b9*b9b10*b10b12b13*b13b15*b15b18y1y3y5y12y15y18y19y30y33 | 3388.80 | 93.956  | 221372 | 3 | 1130.27 | 0.79   |
| P25077 MDH_SALTY Malate dehydrogenase | 2  | Carbamidomethyl+C(2)  | ACVGITNPVNTTVAIAAEVLKK            | 111 | 23 | 12 | 49.83  | b2b4b5b8*b8b13*b13y3y13y15y20y23                                         | 2382.34 | 105.760 | 147653 | 3 | 794.78  | -3.07  |
| P25077 MDH_SALTY Malate dehydrogenase | 3  |                       | VAVLGAAGGIGQALALLK                | 2   | 19 | 16 | 124.8  | b3b6b7b9b10y1y2y3y4y5y7y9y12y13y15y19                                    | 1735.09 | 120.983 | 136916 | 2 | 868.05  | 4.22   |
| P25077 MDH_SALTY Malate dehydrogenase | 4  |                       | FFSQPLLLGK                        | 262 | 10 | 8  | 47.63  | b2b3y1y2y4y6y8y10                                                        | 1149.66 | 76.035  | 120995 | 2 | 575.34  | -2.87  |



|                                            |    |                       |                               |     |    |    |        |                                             |         |         |        |   |         |        |
|--------------------------------------------|----|-----------------------|-------------------------------|-----|----|----|--------|---------------------------------------------|---------|---------|--------|---|---------|--------|
| P25077 MDH_SALTY Malate dehydrogenase      | 5  |                       | IQNAGTEVVEAK                  | 205 | 12 | 16 | 96.25  | b2b3b10*b10y1y3°y3y4°y4y5y8°y8y9y10°y10*y10 | 1258.66 | 34.384  | 96199  | 2 | 629.83  | -2.23  |
| P25077 MDH_SALTY Malate dehydrogenase      | 6  |                       | AGGGSATLSMGQAAAR              | 217 | 16 | 8  | 78.32  | b6y7y8y9y10y11y12y16                        | 1405.69 | 39.744  | 84678  | 2 | 703.35  | 1.04   |
| P25077 MDH_SALTY Malate dehydrogenase      | 7  |                       | DIQLGEDFINK                   | 301 | 11 | 9  | 47.38  | b3b6y2y5y8°y8y9°y9y11                       | 1291.65 | 67.643  | 77356  | 2 | 646.33  | -0.66  |
| P25077 MDH_SALTY Malate dehydrogenase      | 8  |                       | KDIQLGEDFINK                  | 300 | 12 | 3  | 22.09  | b6b9y8                                      | 1419.74 | 74.235  | 19122  | 2 | 710.37  | -4.73  |
| P25077 MDH_SALTY Malate dehydrogenase      | 9  | Carbamidomethyl+C(2)  | ACVGITNPVNTTVAIAAEVLK         | 111 | 22 | 3  | 19.84  | b3b5b11                                     | 2254.24 | 114.037 | 8168   | 3 | 752.09  | -2.06  |
| P25077 MDH_SALTY Malate dehydrogenase      | 10 |                       | SNTFVAELK                     | 153 | 9  | 3  | 30.28  | b3y4y7                                      | 1008.54 | 54.553  | 55325  | 2 | 504.77  | -0.18  |
| P25077 MDH_SALTY Malate dehydrogenase      | 11 |                       | SDLFVNAGIVK                   | 87  | 12 | 4  | 36.99  | b3y3y6y8                                    | 1276.69 | 69.768  | 38501  | 2 | 638.85  | -3.44  |
| P25077 MDH_SALTY Malate dehydrogenase      | 12 | Carbamidomethyl+C(11) | ALQGEKGVVECAYPEGDGQYAR        | 240 | 22 | 5  | 20.68  | b5b7b13*b13y12                              | 2399.11 | 99.250  | 134024 | 3 | 800.37  | -9.16  |
| P25077 MDH_SALTY Malate dehydrogenase      | 13 |                       | IQNAGTEVVEAKAGGGSATLSMGQAAAR  | 205 | 28 | 5  | 38.31  | b5b6b7y4y7                                  | 2645.36 | 120.713 | 5974   | 3 | 882.46  | 9.32   |
| P25077 MDH_SALTY Malate dehydrogenase      | 14 |                       | FFSQPLLLGKNGVEER              | 262 | 16 | 4  | 23.54  | b5b6*b6y6                                   | 1833.99 | 108.755 | 3401   | 3 | 612.00  | 1.66   |
| P25077 MDH_SALTY Malate dehydrogenase      | 15 | Oxidation+M(10)       | AGGGSATLSMGQAAAR              | 217 | 16 | 4  | 17     | b6°b6b9y9                                   | 1421.70 | 68.539  | 11747  | 2 | 711.35  | 12.88  |
| P67093 UG_SALTY Universal stress protein G | 1  |                       | TIIMPVDVFEMELSDK              | 3   | 16 | 11 | 64.72  | b2°b2b3b4°b4b9b14y12y13y14y16               | 1866.93 | 105.053 | 79321  | 2 | 933.97  | 6.28   |
| P67093 UG_SALTY Universal stress protein G | 2  |                       | HAEFLAQQDGVHLLHVLPGSASMSLHR   | 22  | 28 | 3  | 11.63  | b9b11y13                                    | 3063.57 | 115.177 | 1645   | 4 | 766.65  | -8.13  |
| P67093 UG_SALTY Universal stress protein G | 3  |                       | DVVNEMGEELDADVVVIGSR          | 94  | 20 | 6  | 30.36  | b6*b6b7b12y12y14                            | 2146.07 | 119.398 | 4002   | 2 | 1073.54 | 19.11  |
| P67093 UG_SALTY Universal stress protein G | 4  |                       | RFEHLQHEAETR                  | 56  | 13 | 6  | 56.12  | b4b7b11y3y6y8                               | 1681.81 | 82.742  | 5984   | 3 | 561.27  | 1.23   |
| P67093 UG_SALTY Universal stress protein G | 5  |                       | FEEHLQHEAETRLQTMVGHFSIDPSR    | 57  | 26 | 3  | 22.72  | y5y6y12                                     | 3094.46 | 61.383  | 3629   | 4 | 774.37  | -6.94  |
| P0A1P6 GLNA_SALTY Glutamine synthetase     | 1  |                       | LVPGYEAPVMLAYSAR              | 322 | 16 | 12 | 124.76 | b2b7b15y3y4y5y7y8y9y10y11y14                | 1736.92 | 77.459  | 48122  | 2 | 868.96  | 6.68   |
| P0A1P6 GLNA_SALTY Glutamine synthetase     | 2  |                       | GGYFPVPPVDSAQDIR              | 177 | 16 | 6  | 27.43  | b12y2y7y10y12y16                            | 1717.86 | 69.997  | 31521  | 2 | 859.43  | 3.48   |
| P0A1P6 GLNA_SALTY Glutamine synthetase     | 3  |                       | EIPQVAGSLEEALNALDLDR          | 406 | 20 | 7  | 19.56  | b10b15y1y4°y4y12y20                         | 2153.09 | 96.153  | 31209  | 3 | 718.37  | -8.73  |
| P0A1P6 GLNA_SALTY Glutamine synthetase     | 4  |                       | AINALANPTTNSYKR               | 307 | 15 | 6  | 55.05  | y5y7y8y9y10y15                              | 1633.86 | 42.870  | 28280  | 3 | 545.29  | -3.36  |
| P0A1P6 GLNA_SALTY Glutamine synthetase     | 5  |                       | ATGIADTVLFGPEPEFFLFDDIR       | 117 | 23 | 6  | 28.62  | y2y3°y3y5y8y13                              | 2570.27 | 118.167 | 18370  | 3 | 857.43  | -5.70  |
| P0A1P6 GLNA_SALTY Glutamine synthetase     | 6  | Carbamidomethyl+C(11) | FPDPAANPYLCFAALLMAGLDGIK      | 360 | 24 | 7  | 36.63  | b14°b14b15y7y15y16y24                       | 2565.29 | 136.704 | 17596  | 2 | 1283.15 | 0.19   |
| P0A1P6 GLNA_SALTY Glutamine synthetase     | 7  |                       | AINALANPTTNSYK                | 307 | 14 | 5  | 41.5   | y2y4y9y10y11                                | 1477.76 | 47.662  | 10445  | 2 | 739.39  | -0.17  |
| P0A1P6 GLNA_SALTY Glutamine synthetase     | 8  |                       | EIPQVAGSLEEALNALDLREFLK       | 406 | 24 | 6  | 18.92  | b1b2b4°b4b8b15                              | 2670.39 | 103.690 | 9232   | 3 | 890.80  | -1.92  |
| P0A1P6 GLNA_SALTY Glutamine synthetase     | 9  |                       | MSAEHVLTMLNEHEVK              | 0   | 16 | 5  | 17     | b11b13*b13y10y16                            | 1867.92 | 105.108 | 5525   | 3 | 623.31  | 6.21   |
| P0A1P6 GLNA_SALTY Glutamine synthetase     | 10 |                       | AGGVFTDEAIDAYIALR             | 430 | 17 | 3  | 16.17  | b5b10y12                                    | 1781.89 | 76.355  | 102810 | 2 | 891.45  | -10.76 |
| P0A1P6 GLNA_SALTY Glutamine synthetase     | 11 |                       | GINESDMVLPDASTAVIDPFFADSTLIIR | 59  | 30 | 10 | 69.68  | b3b8b9b10b16y3y6y11y12y13                   | 3238.62 | 114.270 | 14236  | 3 | 1080.21 | 6.03   |
| P0A1P6 GLNA_SALTY Glutamine synthetase     | 12 |                       | SAEHVLTMLNEHEVK               | 1   | 15 | 3  | 17.98  | b10b14y10                                   | 1736.85 | 82.781  | 13133  | 3 | 579.62  | -9.21  |
| P0A1P6 GLNA_SALTY Glutamine synthetase     | 13 |                       | FVDLR                         | 16  | 5  | 2  | 13.14  | y4°y4                                       | 649.36  | 43.566  | 5284   | 1 | 649.36  | -11.84 |

|                                                            |    |                                       |                                   |     |    |    |       |                                    |         |         |       |   |         |        |
|------------------------------------------------------------|----|---------------------------------------|-----------------------------------|-----|----|----|-------|------------------------------------|---------|---------|-------|---|---------|--------|
| [P0A1P6]GLNA_SALTY Glutamine synthetase                    | 14 |                                       | EQHVTIPAHQVNAEFFEEGK              | 28  | 20 | 5  | 25.04 | b13y3y4°y4y7                       | 2310.12 | 106.991 | 3030  | 2 | 1155.56 | 1.27   |
| [P0A1P6]GLNA_SALTY Glutamine synthetase                    | 15 |                                       | MSAEHVLTMLNEHEVKFVDLR             | 0   | 21 | 6  | 29.48 | b10b11b13y10y13°y13                | 2498.29 | 91.749  | 14769 | 3 | 833.43  | 14.76  |
| [P0A1P6]GLNA_SALTY Glutamine synthetase                    | 16 |                                       | VRMTPHPVEFELYYSV                  | 453 | 16 | 4  | 27.43 | b11y6y8y13                         | 1966.97 | 110.814 | 1728  | 3 | 656.33  | -0.99  |
| [P0A1P6]GLNA_SALTY Glutamine synthetase                    | 17 | Carbamidomethyl+C(4); Oxidation+M(3)  | SEMCLVMEQMGLVVEAHHHEVA TAGQNEVATR | 193 | 32 | 3  | 11.1  | b6y8y11                            | 3579.65 | 118.087 | 15847 | 3 | 1193.89 | 2.39   |
| [P0A1P6]GLNA_SALTY Glutamine synthetase                    | 18 |                                       | EIPQVAGSLE                        | 406 | 10 | 1  | 8.17  | y6                                 | 1042.55 | 103.625 | 4973  | 1 | 1042.55 | 6.91   |
| [P0A1P6]GLNA_SALTY Glutamine synthetase                    | 19 | Carbamidomethyl+C(11)                 | FPDPAANPYLCFAA                    | 360 | 14 | 0  | 7.82  |                                    | 1553.72 | 136.687 | 4832  | 1 | 1553.72 | 8.88   |
| [P0A1P6]GLNA_SALTY Glutamine synthetase                    | 20 |                                       | NALANPTTNSYKR                     | 309 | 13 | 0  | 4.12  |                                    | 1449.75 | 42.865  | 2756  | 2 | 725.38  | 0.93   |
| [P0A251]AHPC_SALTY Alkyl hydroperoxide reductase subunit C | 1  |                                       | YAMIGDPTGALTR                     | 93  | 13 | 8  | 42.76 | b2b3b6y1y5y7y10y13                 | 1365.68 | 62.912  | 84628 | 2 | 683.34  | -0.72  |
| [P0A251]AHPC_SALTY Alkyl hydroperoxide reductase subunit C | 2  | Carbamidomethyl+C(13)                 | AAQYVAAHPGVECPAK                  | 153 | 16 | 9  | 66.3  | b3b4y3y8y9°y9y11y12y16             | 1668.80 | 35.208  | 71567 | 3 | 556.94  | -12.73 |
| [P0A251]AHPC_SALTY Alkyl hydroperoxide reductase subunit C | 3  |                                       | ATFVVDPQGHIAIEVT AEGIGR           | 120 | 23 | 12 | 63.94 | b2°b2b4b8b9b14y2y3y4y6y7y10        | 2384.27 | 130.121 | 40819 | 3 | 795.43  | -6.45  |
| [P0A251]AHPC_SALTY Alkyl hydroperoxide reductase subunit C | 4  |                                       | LGVDVYSVSTDTHFTHK                 | 63  | 17 | 3  | 16.17 | b10y9y11                           | 1905.96 | 70.075  | 1647  | 2 | 953.48  | 12.68  |
| [P0A251]AHPC_SALTY Alkyl hydroperoxide reductase subunit C | 5  | Carbamidomethyl+C(15)                 | WSVFFFPADFTFVCPTELGDVA DHYEELQK   | 32  | 31 | 6  | 27.52 | b5b6b8b11y7y12                     | 3757.71 | 79.993  | 7744  | 4 | 940.18  | -2.08  |
| [P0A251]AHPC_SALTY Alkyl hydroperoxide reductase subunit C | 6  |                                       | YAMIGDPTGALTRNFDNMR               | 93  | 19 | 3  | 22.58 | b4b5y12                            | 2142.98 | 100.309 | 3022  | 4 | 536.50  | -13.10 |
| [P0A251]AHPC_SALTY Alkyl hydroperoxide reductase subunit C | 7  | Carbamidomethyl+C(10)                 | YVAAHPGEVCPAK                     | 156 | 13 | 1  | 7.25  | b3                                 | 1398.70 | 35.235  | 2009  | 2 | 699.85  | 11.00  |
| [Q9L4T0]LUXS_SALTY S-ribosylhomocysteine lyase             | 1  | Carbamidomethyl+C(15)                 | VQDQNQIPELNVYQCGTYQMHSLSAQDIAR    | 113 | 31 | 13 | 62.79 | b2b6b7b11y2y8y10y12y13y17y24y25y31 | 3635.70 | 74.886  | 27225 | 3 | 1212.57 | 3.63   |
| [Q9L4T0]LUXS_SALTY S-ribosylhomocysteine lyase             | 2  |                                       | TGFYMSLIGTPDEQR                   | 84  | 15 | 4  | 17.98 | b3y2y7y11                          | 1714.83 | 78.706  | 25835 | 2 | 857.92  | 9.04   |
| [Q9L4T0]LUXS_SALTY S-ribosylhomocysteine lyase             | 3  | Carbamidomethyl+C(18)                 | DHLNGNGVEIIDISPMGCR               | 65  | 19 | 5  | 20.48 | b5b10y5y8y19                       | 2096.97 | 66.470  | 8326  | 3 | 699.66  | -8.50  |
| [Q9L4T0]LUXS_SALTY S-ribosylhomocysteine lyase             | 4  |                                       | PLLDSEFVDHTR                      | 1   | 12 | 4  | 35.9  | b3b10y6y7                          | 1370.69 | 62.686  | 95823 | 3 | 457.57  | -15.32 |
| [Q9L4T0]LUXS_SALTY S-ribosylhomocysteine lyase             | 5  |                                       | VADAWK                            | 99  | 6  | 2  | 26.69 | b5y5                               | 689.37  | 47.408  | 6494  | 1 | 689.37  | 8.68   |
| [Q9L4T0]LUXS_SALTY S-ribosylhomocysteine lyase             | 6  |                                       | GIHTLEHLFAGFMR                    | 51  | 14 | 3  | 34.68 | y7y8y9                             | 1628.81 | 58.323  | 4047  | 3 | 543.61  | -17.01 |
| [Q9L4T0]LUXS_SALTY S-ribosylhomocysteine lyase             | 7  | Carbamidomethyl+C(2)                  | FCIPNK                            | 39  | 6  | 1  | 13.55 | y5                                 | 778.39  | 129.024 | 1834  | 1 | 778.39  | 0.55   |
| [Q9L4T0]LUXS_SALTY S-ribosylhomocysteine lyase             | 8  |                                       | EVMPEK                            | 45  | 6  | 1  | 13.55 | y5                                 | 732.36  | 60.968  | 1502  | 1 | 732.36  | 4.67   |
| [Q9L4T0]LUXS_SALTY S-ribosylhomocysteine lyase             | 9  | Carbamidomethyl+C(18)                 | TMNTPHGDAITVFDLRF CIPNK           | 23  | 22 | 6  | 20.68 | b12y6*y6y9*y9y18                   | 2547.27 | 136.347 | 7729  | 2 | 1274.14 | 9.68   |
| [Q9L4T0]LUXS_SALTY S-ribosylhomocysteine lyase             | 10 | Carbamidomethyl+C(15);Oxidation+M(20) | VQDQNQIPELNVYQCGTYQMHSLSAQDIAR    | 113 | 31 | 3  | 11.2  | b6y5y13                            | 3651.72 | 104.670 | 10882 | 3 | 1217.91 | 9.89   |
| [P00924]ENO1_YEAST Enolase 1                               | 1  |                                       | NVNDVIAPAFVK                      | 67  | 12 | 11 | 77.09 | b2b4b5°b5b6y5y6y7y10*y10y12        | 1286.71 | 66.055  | 77723 | 2 | 643.86  | 2.28   |
| [P00924]ENO1_YEAST Enolase 1                               | 2  |                                       | VNQIGTLSSEIK                      | 346 | 12 | 12 | 93.24 | b2b3b9y1y2y3y5y6y8y9y10y12         | 1288.71 | 54.184  | 64197 | 2 | 644.86  | -0.95  |
| [P00924]ENO1_YEAST Enolase 1                               | 3  |                                       | TAGIQIVADDLTVTNPK                 | 312 | 17 | 4  | 16.17 | b5y6y10y17                         | 1755.96 | 72.320  | 37921 | 2 | 878.48  | 4.17   |
| [P00924]ENO1_YEAST Enolase 1                               | 4  |                                       | IATAIEK                           | 330 | 7  | 6  | 37.24 | b4°b4y1y5y6y7                      | 745.44  | 28.271  | 28668 | 2 | 373.22  | -9.01  |
| [P00924]ENO1_YEAST Enolase 1                               | 5  |                                       | LGANAILGVSLAASR                   | 105 | 15 | 4  | 10.4  | b5°b5y1y3                          | 1412.82 | 70.851  | 27698 | 2 | 706.91  | 0.09   |
| [P00924]ENO1_YEAST Enolase 1                               | 6  |                                       | SIVPSGASTGVHEALEMR                | 32  | 18 | 6  | 24.6  | b1b9y3y4°y8y12                     | 1840.93 | 74.279  | 14585 | 3 | 614.31  | 2.45   |
| [P00924]ENO1_YEAST Enolase 1                               | 7  |                                       | AVDDFLISLDGTANK                   | 88  | 15 | 5  | 48.23 | y5y6y7y8y15                        | 1578.81 | 82.233  | 14192 | 2 | 789.91  | 3.87   |
| [P00924]ENO1_YEAST Enolase 1                               | 8  |                                       | AAQDSFAAGWGV MVSHR                | 358 | 17 | 5  | 23.57 | b1y3y5y11°y11                      | 1789.85 | 60.874  | 6566  | 2 | 895.43  | 3.96   |

|                                               |    |                       |                                        |     |    |    |        |                                               |         |         |        |   |         |        |
|-----------------------------------------------|----|-----------------------|----------------------------------------|-----|----|----|--------|-----------------------------------------------|---------|---------|--------|---|---------|--------|
| P00924 ENO1_YEAST Enolase 1                   | 9  |                       | WLTGPQLADLYHSLMK                       | 272 | 16 | 3  | 17     | b11b13y12                                     | 1872.96 | 89.740  | 5561   | 2 | 936.98  | -5.28  |
| P00924 ENO1_YEAST Enolase 1                   | 10 |                       | AADALLLK                               | 338 | 8  | 3  | 40.66  | y5y6y7                                        | 814.49  | 53.860  | 65563  | 2 | 407.75  | -10.64 |
| P00924 ENO1_YEAST Enolase 1                   | 11 |                       | IEEELGDNAVFAGENFHHGDK                  | 415 | 21 | 7  | 38.32  | b11y4y12*y12y13*y13y14                        | 2328.09 | 81.464  | 42198  | 3 | 776.70  | 15.84  |
| P00924 ENO1_YEAST Enolase 1                   | 12 |                       | NVPLYK                                 | 126 | 6  | 1  | 13.55  | y4                                            | 733.41  | 37.137  | 11818  | 1 | 733.41  | -14.48 |
| P00924 ENO1_YEAST Enolase 1                   | 13 |                       | IGSEVYHNLK                             | 185 | 10 | 4  | 39.06  | b3b7y5y8                                      | 1159.60 | 93.345  | 5343   | 2 | 580.30  | -11.05 |
| P00924 ENO1_YEAST Enolase 1                   | 14 |                       | GNPTVEVELTTEK                          | 15  | 13 | 5  | 33.82  | b3b6b8y12*y12                                 | 1416.74 | 97.278  | 4250   | 2 | 708.87  | 9.82   |
| P00924 ENO1_YEAST Enolase 1                   | 15 |                       | TFAEALR                                | 178 | 7  | 3  | 37.24  | b4b5y6                                        | 807.44  | 43.467  | 3976   | 2 | 404.22  | 3.48   |
| P00924 ENO1_YEAST Enolase 1                   | 16 |                       | YGASAGNVGDEGGVAPNIQTAAEE<br>ALDLIVDAIK | 201 | 33 | 3  | 16.8   | b3b5b16                                       | 3257.58 | 125.719 | 2230   | 3 | 1086.53 | -10.49 |
| P00924 ENO1_YEAST Enolase 1                   | 17 | Phosphoryl STY(11)    | WLTGPQLADLYHSLMKR                      | 272 | 17 | 4  | 27.17  | b9y7y8y15                                     | 2109.05 | 76.415  | 22586  | 2 | 1055.03 | 9.72   |
| P00924 ENO1_YEAST Enolase 1                   | 18 | Oxidation+M(17)       | SIVPSGASTGVHEALEMRDGDGK                | 32  | 22 | 4  | 20.68  | b7b9b11y4                                     | 2272.12 | 62.931  | 2444   | 2 | 1136.56 | 13.65  |
| P00924 ENO1_YEAST Enolase 1                   | 19 |                       | IATAIEK                                | 330 | 7  | 0  | 0.82   |                                               | 727.43  | 28.163  | 5032   | 2 | 364.22  | -4.95  |
| Q8ZQT5 TOLB_SALTY Protein tolB                | 1  |                       | SNNTTEPTWFPDSQTLAFTSDQAG<br>RPQVYK     | 287 | 29 | 11 | 35.32  | b2*b2b4b5°b5y1y2y12y13<br>y24y29              | 3285.56 | 77.563  | 70810  | 3 | 1095.86 | 3.94   |
| Q8ZQT5 TOLB_SALTY Protein tolB                | 2  |                       | SPQPLMSPAWSPDGSK                       | 197 | 16 | 6  | 44.89  | b3b9b12y9y11y13                               | 1684.81 | 62.401  | 56256  | 2 | 842.91  | 7.61   |
| Q8ZQT5 TOLB_SALTY Protein tolB                | 3  |                       | IEITQGVSARPIGVVPPFK                    | 24  | 19 | 8  | 33.06  | b2b4y1y3y14y16y17y19                          | 2026.11 | 70.589  | 40734  | 3 | 676.04  | -10.18 |
| Q8ZQT5 TOLB_SALTY Protein tolB                | 4  |                       | LPATDGQVK                              | 413 | 9  | 6  | 45.18  | b5b9y6y7y8y9                                  | 928.51  | 27.726  | 37672  | 2 | 464.76  | 0.26   |
| Q8ZQT5 TOLB_SALTY Protein tolB                | 5  |                       | WAGPGAAPEDIGGIVAADLR                   | 43  | 20 | 12 | 90.22  | b3b5b6b7b8y2y5y6y9y13y<br>14y20               | 1936.00 | 85.590  | 37657  | 2 | 968.51  | 6.43   |
| Q8ZQT5 TOLB_SALTY Protein tolB                | 6  |                       | MNINGGAAQR                             | 316 | 10 | 7  | 53.96  | b2b3b4y3y6y7y10                               | 1031.51 | 27.846  | 28406  | 2 | 516.26  | 4.26   |
| Q8ZQT5 TOLB_SALTY Protein tolB                | 7  |                       | TGSLNLYVMDLASGQIR                      | 264 | 17 | 4  | 29.68  | b9b14y9y10                                    | 1837.93 | 89.776  | 13060  | 2 | 919.47  | -8.97  |
| Q8ZQT5 TOLB_SALTY Protein tolB                | 8  |                       | YAGHTASDEVFEK                          | 142 | 13 | 3  | 25.23  | b6y7y8                                        | 1453.69 | 97.276  | 5386   | 3 | 485.23  | 19.48  |
| Q8ZQT5 TOLB_SALTY Protein tolB                | 9  |                       | FNPLDR                                 | 67  | 6  | 1  | 13.55  | y4                                            | 761.39  | 46.250  | 1714   | 2 | 381.20  | -9.14  |
| Q8ZQT5 TOLB_SALTY Protein tolB                | 10 |                       | QVASFPRHNGAPAFSPDGTK                   | 237 | 20 | 4  | 14.24  | b6b9*b9y14                                    | 2084.01 | 82.894  | 4895   | 2 | 1042.51 | -8.43  |
| Q8ZQT5 TOLB_SALTY Protein tolB                | 11 |                       | QWLRYAGHTASDEVFEK                      | 138 | 17 | 3  | 16.17  | b14y8y12                                      | 2037.00 | 107.201 | 3595   | 2 | 1019.00 | 9.89   |
| Q8ZQT5 TOLB_SALTY Protein tolB                | 12 |                       | AAPEDIGGIVAADLR                        | 48  | 15 | 0  | 6.17   |                                               | 1467.76 | 85.586  | 17959  | 2 | 734.38  | -12.39 |
| P67091 UF_SALTY Universal stress<br>protein F | 1  |                       | TILVPIDISDSELTQR                       | 3   | 16 | 17 | 139.08 | b2b3°b3b4y2y3y5y6°y6y7*<br>y7y8y9y10y12y14y16 | 1799.98 | 81.960  | 109165 | 2 | 900.49  | 2.71   |
| P67091 UF_SALTY Universal stress<br>protein F | 2  |                       | VQAHVAEGSPK                            | 85  | 11 | 6  | 35.87  | b1y5°y5y6y7°y7                                | 1122.57 | 18.337  | 11284  | 2 | 561.79  | -14.14 |
| P67091 UF_SALTY Universal stress<br>protein F | 3  |                       | VQAHVAEGSPKDK                          | 85  | 13 | 5  | 32.05  | b4y2y4y7y8                                    | 1365.70 | 16.018  | 4389   | 3 | 455.90  | -9.92  |
| P67091 UF_SALTY Universal stress<br>protein F | 4  |                       | VISHVEAEAK                             | 19  | 10 | 3  | 28.47  | b8y5y6                                        | 1082.58 | 106.371 | 12918  | 2 | 541.79  | -3.50  |
| P67091 UF_SALTY Universal stress<br>protein F | 5  | Oxidation+M(27)       | VHFLTVPISLPYYASLGLAYSALP<br>AMDDLK     | 34  | 31 | 3  | 21.99  | b3b4y5                                        | 3410.76 | 93.956  | 151555 | 4 | 853.45  | 0.86   |
| P0A7X0 RS8_SALTY 30S ribosomal<br>protein S8  | 1  |                       | SMQDPIADMLTR                           | 1   | 12 | 14 | 112.7  | b2b3y1y2°y2y3y4y5y6y7y8<br>y9y10y12           | 1377.65 | 78.405  | 151651 | 2 | 689.33  | -0.80  |
| P0A7X0 RS8_SALTY 30S ribosomal<br>protein S8  | 2  |                       | AAVTMPSSK                              | 22  | 9  | 10 | 74.47  | b1b3y2y3y4°y4y5y6y7y9                         | 891.46  | 31.188  | 80573  | 2 | 446.23  | -6.09  |
| P0A7X0 RS8_SALTY 30S ribosomal<br>protein S8  | 3  |                       | AVVESIQR                               | 69  | 8  | 11 | 66.94  | b2b3b5y1y4*y4y5y6*y6y8<br>*y8                 | 901.50  | 32.707  | 77606  | 2 | 451.25  | -11.37 |
| P0A7X0 RS8_SALTY 30S ribosomal<br>protein S8  | 4  | Carbamidomethyl+C(10) | QAGLGGEIICYVA                          | 117 | 13 | 7  | 39.04  | b2b10°b10y2y7y8y9                             | 1350.67 | 80.988  | 21198  | 2 | 675.84  | 1.27   |

|                                                                 |    |                       |                                       |     |    |    |        |                                               |         |         |        |   |         |        |
|-----------------------------------------------------------------|----|-----------------------|---------------------------------------|-----|----|----|--------|-----------------------------------------------|---------|---------|--------|---|---------|--------|
| P0A7X0 RS8_SALTY 30S ribosomal protein S8                       | 5  |                       | MSMQDPIADMLTR                         | 0   | 13 | 5  | 42.76  | b4b8y3y5y10                                   | 1508.71 | 47.374  | 1827   | 3 | 503.57  | 11.73  |
| P0A7X0 RS8_SALTY 30S ribosomal protein S8                       | 6  |                       | VEGDTKPELELTLYFQGK                    | 50  | 19 | 9  | 52.61  | b3b7°b7b8°b8y4y5y6*y6                         | 2195.13 | 136.248 | 3079   | 2 | 1098.07 | -12.46 |
| P0A7X0 RS8_SALTY 30S ribosomal protein S8                       | 7  |                       | VTMPSSK                               | 24  | 7  | 0  | 1.65   |                                               | 749.38  | 31.141  | 16051  | 1 | 749.38  | -4.81  |
| P0A7X0 RS8_SALTY 30S ribosomal protein S8                       | 8  |                       | AVTMPSSK                              | 23  | 8  | 0  | 1.65   |                                               | 820.42  | 31.227  | 4180   | 2 | 410.71  | -1.26  |
| P0A7X0 RS8_SALTY 30S ribosomal protein S8                       | 9  |                       | VVESIQR                               | 70  | 7  | 0  | 1.23   |                                               | 830.48  | 32.776  | 2321   | 1 | 830.48  | 10.66  |
| Q9ZF60 GLTI_SALTY Glutamate/aartate periplasmic-binding protein | 1  |                       | VVGYSQDYSNAIVEAVKK                    | 61  | 18 | 9  | 44.03  | b2y1y2y4y6y7y12y16y18                         | 1970.01 | 63.255  | 183828 | 3 | 657.34  | -8.18  |
| Q9ZF60 GLTI_SALTY Glutamate/aartate periplasmic-binding protein | 2  |                       | ESSVPFSYYDNQQK                        | 47  | 14 | 15 | 109.55 | b3°b3b4°b4b5b11y4*y4y5y6y7y8y10*y10y14        | 1691.76 | 55.047  | 157008 | 2 | 846.38  | 3.90   |
| Q9ZF60 GLTI_SALTY Glutamate/aartate periplasmic-binding protein | 3  |                       | VVGYSQDYSNAIVEAVK                     | 61  | 17 | 17 | 101.16 | b2b3b6b17y1y2y3y4y5y10*y10y11*y11y12y13y15y17 | 1841.94 | 67.647  | 95887  | 2 | 921.47  | 6.49   |
| Q9ZF60 GLTI_SALTY Glutamate/aartate periplasmic-binding protein | 4  |                       | AVAFMMDDALLAGER                       | 198 | 15 | 8  | 58.41  | b3b5b14y4y10y11y13y15                         | 1609.78 | 84.567  | 86109  | 2 | 805.39  | 5.84   |
| Q9ZF60 GLTI_SALTY Glutamate/aartate periplasmic-binding protein | 5  |                       | GGDIKDFPDLK                           | 141 | 11 | 5  | 24.11  | b2b3y6y10y11                                  | 1204.63 | 69.650  | 33104  | 2 | 602.82  | 7.19   |
| Q9ZF60 GLTI_SALTY Glutamate/aartate periplasmic-binding protein | 6  | Carbamidomethyl+C(13) | IPLLQNGTFDFECGSTTNNLER                | 98  | 22 | 9  | 13.32  | b2b14*b14y1y6y9°y9*y9y22                      | 2526.19 | 81.619  | 25060  | 3 | 842.74  | -0.77  |
| Q9ZF60 GLTI_SALTY Glutamate/aartate periplasmic-binding protein | 7  | Carbamidomethyl+C(22) | LIPITSQNRIPLLQNGTFDFECGSTTNNLER       | 89  | 31 | 6  | 43.99  | y4y6y7y9y10y21                                | 3548.79 | 86.969  | 216325 | 3 | 1183.60 | 3.03   |
| Q9ZF60 GLTI_SALTY Glutamate/aartate periplasmic-binding protein | 8  |                       | AVVVTSGTTSEILLHKLNEEQK                | 154 | 22 | 4  | 24.03  | b3y8y18y19                                    | 2396.29 | 63.713  | 54476  | 3 | 799.44  | -4.79  |
| Q9ZF60 GLTI_SALTY Glutamate/aartate periplasmic-binding protein | 9  |                       | KLMDDTIAQAQTSGEAEK                    | 246 | 18 | 4  | 15.44  | b11y9y12*y12                                  | 1935.95 | 84.124  | 4711   | 2 | 968.48  | 10.91  |
| Q9ZF60 GLTI_SALTY Glutamate/aartate periplasmic-binding protein | 10 |                       | NPIPPKNLNMNFELSDEMK                   | 271 | 19 | 4  | 28.26  | b11b12y6y12                                   | 2231.11 | 107.132 | 1680   | 2 | 1116.06 | 10.72  |
| Q9ZF60 GLTI_SALTY Glutamate/aartate periplasmic-binding protein | 11 | Phosphoryl STY(5)     | QAAFSDTIFVVGTR                        | 122 | 14 | 5  | 24.55  | b4*b4y11°y11y12                               | 1591.75 | 57.503  | 2548   | 3 | 531.25  | 3.68   |
| Q9ZF60 GLTI_SALTY Glutamate/aartate periplasmic-binding protein | 12 | Oxidation+M(8)        | LTTAMLVMGLSAGLAHAEDGAP AAGSTLDK       | 5   | 30 | 4  | 36.21  | b7b8b9b18                                     | 2885.46 | 87.651  | 9630   | 3 | 962.49  | 8.21   |
| Q7CR87 SURA_SALTY Chaperone surA                                | 1  |                       | IQELPGIFAQALSTAK                      | 235 | 16 | 13 | 35.13  | b2*b2b3*b3b4*b4b15y1y2y3°y3y12y16             | 1686.95 | 90.137  | 54000  | 2 | 843.98  | 2.53   |
| Q7CR87 SURA_SALTY Chaperone surA                                | 2  |                       | LAYDGLNYSTYR                          | 117 | 12 | 7  | 49.34  | b5y4y7*y7y8y10y12                             | 1435.69 | 58.441  | 37481  | 2 | 718.35  | 6.04   |
| Q7CR87 SURA_SALTY Chaperone surA                                | 3  |                       | LNAGQAGQQLPDDATLR                     | 50  | 17 | 13 | 97.64  | b1b3y3y4°y4y5y7°y7y8y9y11y12y17               | 1767.90 | 50.468  | 29654  | 2 | 884.45  | 2.07   |
| Q7CR87 SURA_SALTY Chaperone surA                                | 4  |                       | ITVLPQEV DALAK                        | 149 | 13 | 11 | 25.23  | b2°b2b3°b3y1y2y9°y9*y9y10y13                  | 1396.81 | 70.594  | 28339  | 2 | 698.91  | 2.18   |
| Q7CR87 SURA_SALTY Chaperone surA                                | 5  |                       | TTFAAAAKEYSQDPGSANQGDDL GWATPDIFDPAFR | 318 | 36 | 7  | 21.31  | b1b7b9°b9b10y1y4                              | 3772.80 | 136.263 | 15825  | 4 | 943.96  | 12.68  |
| Q7CR87 SURA_SALTY Chaperone surA                                | 6  |                       | GQSQSISVTEVHAR                        | 274 | 14 | 4  | 32.77  | b8b9y3y10                                     | 1498.76 | 36.918  | 15028  | 3 | 500.26  | -1.87  |

|                                                       |    |                                                |                                                |     |    |    |       |                                                   |         |         |        |   |         |        |
|-------------------------------------------------------|----|------------------------------------------------|------------------------------------------------|-----|----|----|-------|---------------------------------------------------|---------|---------|--------|---|---------|--------|
| Q7CR87 SURA_SALTY Chaperone surA                      | 7  |                                                | QIGTQNDASTELNLSHILALPENP<br>TSEQVNDAGR         | 162 | 35 | 5  | 10.91 | b13y1y3y9y35                                      | 3816.90 | 88.724  | 14932  | 3 | 1272.97 | 0.13   |
| Q7CR87 SURA_SALTY Chaperone surA                      | 8  |                                                | ITDEQLDQAIANIAK                                | 90  | 15 | 3  | 24    | b8y8y9                                            | 1642.87 | 80.289  | 33528  | 2 | 821.94  | 1.34   |
| Q7CR87 SURA_SALTY Chaperone surA                      | 9  |                                                | QAESIVEEAR                                     | 197 | 10 | 3  | 26.71 | b4y6y9                                            | 1131.59 | 71.949  | 19158  | 2 | 566.30  | 19.85  |
| Q7CR87 SURA_SALTY Chaperone surA                      | 10 |                                                | VAAVVNNGVVLESVDGLMQSV<br>K                     | 27  | 23 | 4  | 12.94 | b16y5y9°y9                                        | 2343.21 | 91.095  | 16876  | 2 | 1172.11 | -3.44  |
| Q7CR87 SURA_SALTY Chaperone surA                      | 11 |                                                | NNEVR                                          | 142 | 5  | 1  | 13.14 | y3                                                | 631.31  | 21.024  | 1966   | 1 | 631.31  | -7.93  |
| Q7CR87 SURA_SALTY Chaperone surA                      | 12 |                                                | LAITYSADQQALKGGQMGWGR                          | 214 | 21 | 3  | 13.75 | b12b15y18                                         | 2251.13 | 65.232  | 23603  | 3 | 751.05  | 2.17   |
| Q7CR87 SURA_SALTY Chaperone surA                      | 13 |                                                | KFSEEAATWMQEQR                                 | 404 | 14 | 4  | 27.32 | b4b11y5y9                                         | 1740.79 | 84.289  | 16689  | 2 | 870.90  | -8.70  |
| Q7CR87 SURA_SALTY Chaperone surA                      | 14 |                                                | NGADFGKLAITYSADQQALK                           | 207 | 20 | 3  | 22.37 | b11b12y6                                          | 2111.06 | 85.553  | 7479   | 4 | 528.52  | -7.98  |
| Q7CR87 SURA_SALTY Chaperone surA                      | 15 |                                                | LNAGQAGQQLPDDATLRHQILER                        | 50  | 23 | 4  | 23.03 | b3b7*b7b8                                         | 2544.29 | 109.750 | 3569   | 3 | 848.77  | -13.91 |
| P61179 RL22_SALTY 50S ribosomal<br>protein L22        | 1  |                                                | IFVDEGPSMK                                     | 73  | 10 | 8  | 73.91 | b2b6y5y6y7y8y9y10                                 | 1122.55 | 50.921  | 59253  | 2 | 561.78  | -3.91  |
| P61179 RL22_SALTY 50S ribosomal<br>protein L22        | 2  |                                                | IFVDEGPSMKR                                    | 73  | 11 | 5  | 36.46 | b6y5°y5y7y8                                       | 1278.63 | 45.627  | 28971  | 3 | 426.88  | -13.65 |
| P61179 RL22_SALTY 50S ribosomal<br>protein L22        | 3  |                                                | VSQALDILTYTNK                                  | 28  | 13 | 7  | 52.76 | b3b4*b4y4*y4y5y6                                  | 1465.78 | 70.479  | 5524   | 3 | 489.27  | -5.33  |
| P61179 RL22_SALTY 50S ribosomal<br>protein L22        | 4  |                                                | METIAK                                         | 0   | 6  | 1  | 13.55 | y5                                                | 692.36  | 24.713  | 3582   | 2 | 346.68  | -3.09  |
| O33921 AGP_SALTY Glucose-1-<br>phohatase              | 1  |                                                | MGTMDFTFNPVITDDSAAFR                           | 141 | 20 | 11 | 73.85 | b3b5y1y3y5y8y9y11y12y1<br>5y20                    | 2186.00 | 78.321  | 41467  | 2 | 1093.51 | 6.92   |
| O33921 AGP_SALTY Glucose-1-<br>phohatase              | 2  | Carbamidomethyl+C(14)                          | EWLV AQGLIPSGECPADPTVYAY<br>ANSLQR             | 87  | 29 | 18 | 98.05 | b3°b3b4b7b12b16y2y3y4y<br>5y6y7°y7y9y13°y13y20y29 | 3205.58 | 94.023  | 26416  | 3 | 1069.20 | 4.80   |
| O33921 AGP_SALTY Glucose-1-<br>phohatase              | 3  |                                                | IEYVYQSAR                                      | 358 | 9  | 6  | 45.18 | b8y6*y6y7y8y9                                     | 1128.57 | 42.569  | 25370  | 2 | 564.79  | -2.81  |
| O33921 AGP_SALTY Glucose-1-<br>phohatase              | 4  |                                                | APLANNGSVLAQSTPNAWPAWD<br>VPGGQLTTK            | 43  | 31 | 10 | 32.37 | b1b2b4b8b14y8y10y13y14<br>y31                     | 3161.61 | 83.407  | 19714  | 3 | 1054.54 | 1.54   |
| O33921 AGP_SALTY Glucose-1-<br>phohatase              | 5  |                                                | DTFSANYQQEPGVQGPLK                             | 208 | 18 | 5  | 22.6  | y4y8y12*y12y18                                    | 1978.97 | 56.108  | 15699  | 2 | 989.99  | 8.51   |
| O33921 AGP_SALTY Glucose-1-<br>phohatase              | 6  | Carbamidomethyl+C(14)                          | LLEQITHYQDSPCK                                 | 182 | 15 | 3  | 17.98 | b11y11y13                                         | 1818.86 | 79.466  | 14786  | 4 | 455.47  | -4.77  |
| O33921 AGP_SALTY Glucose-1-<br>phohatase              | 7  |                                                | TPIGGQLVFQR                                    | 335 | 11 | 5  | 36.46 | b6°b6y3y8y9                                       | 1215.67 | 61.451  | 66278  | 2 | 608.34  | -11.25 |
| O33921 AGP_SALTY Glucose-1-<br>phohatase              | 8  |                                                | VGNSLVDAFTLQYYEGFPMQVA<br>WGGIHTDR             | 226 | 31 | 3  | 21.99 | b12y9y10                                          | 3486.65 | 105.334 | 15778  | 3 | 1162.89 | 1.75   |
| O33921 AGP_SALTY Glucose-1-<br>phohatase              | 9  |                                                | SQLHLDESYK                                     | 172 | 10 | 3  | 26.71 | b3b8y8                                            | 1219.58 | 40.335  | 1994   | 2 | 610.30  | -10.21 |
| O33921 AGP_SALTY Glucose-1-<br>phohatase              | 10 | Carbamidomethyl+C(2);<br>Carbamidomethyl+C(10) | GCPVDANGFCPLDKFDNMNTA<br>AK                    | 389 | 24 | 4  | 27.78 | y7y12y20y22                                       | 2641.20 | 78.537  | 60896  | 3 | 881.07  | 5.92   |
| O33921 AGP_SALTY Glucose-1-<br>phohatase              | 11 |                                                | NAEALTLSKSPAQR                                 | 370 | 13 | 4  | 25.23 | b4y5*y5y6                                         | 1398.77 | 41.475  | 5282   | 2 | 699.89  | -2.18  |
| O33921 AGP_SALTY Glucose-1-<br>phohatase              | 12 | Carbamidomethyl+C(27)<br>;Oxidation+M(8)       | GGVLEVYMGHYTREWLVAQGLIP<br>SGECPADPTVYAYANSLQR | 74  | 42 | 10 | 33.92 | b3b4b9y5y7°y7y8°y8y10*y<br>10                     | 4684.28 | 136.412 | 6013   | 4 | 1171.83 | 4.90   |
| O33921 AGP_SALTY Glucose-1-<br>phohatase              | 13 |                                                | NYQQEPGVQGPLK                                  | 213 | 13 | 0  | 5.35  |                                                   | 1457.74 | 56.161  | 2659   | 2 | 729.37  | 0.59   |
| P17215 LIVJ_SALTY Leu/Ile/Val/Thr-<br>binding protein | 1  |                                                | TQFMGPEGVANVSLSNIAGESAE<br>GLLVTKPK            | 240 | 31 | 15 | 97.13 | b2°b2b3b4b5y4y5y6y13y1<br>9y22y26y27y29y31        | 3144.63 | 88.565  | 121179 | 3 | 1048.88 | 1.01   |

|                                                   |    |                      |                                            |     |    |    |        |                                           |         |         |        |   |         |        |
|---------------------------------------------------|----|----------------------|--------------------------------------------|-----|----|----|--------|-------------------------------------------|---------|---------|--------|---|---------|--------|
| P17215 LIVJ_SALTY Leu/Ile/Val/Thr-binding protein | 2  |                      | NYDQVPANKPIVDAIK                           | 271 | 16 | 7  | 24.03  | b2*b2b3b10y3y11y16                        | 1784.94 | 53.829  | 117550 | 3 | 595.65  | -10.53 |
| P17215 LIVJ_SALTY Leu/Ile/Val/Thr-binding protein | 3  |                      | TTGLDSQDGPTAAK                             | 137 | 14 | 13 | 83.57  | b2°b2b3°b3b5y3y5y9y10y11y12*y12y14        | 1361.66 | 29.146  | 96320  | 2 | 681.33  | 1.26   |
| P17215 LIVJ_SALTY Leu/Ile/Val/Thr-binding protein | 4  |                      | VAVVGAMSGPVAQYGDQEFTGA<br>EQAIADINAK       | 25  | 32 | 15 | 73.15  | b2b3b7b17y4y5°y5y6*y6y7y10y13y15y25y32    | 3207.57 | 89.922  | 53001  | 3 | 1069.86 | 1.45   |
| P17215 LIVJ_SALTY Leu/Ile/Val/Thr-binding protein | 5  |                      | QQYGEGLAR                                  | 168 | 9  | 6  | 38.06  | b9y2y4y6y7y9                              | 1021.50 | 32.915  | 35730  | 2 | 511.25  | -5.44  |
| P17215 LIVJ_SALTY Leu/Ile/Val/Thr-binding protein | 6  |                      | QDPSGAFVWTTYAALQSLQAGLN<br>HSDDPAEIAK      | 290 | 33 | 5  | 13.18  | b6b11y10y15y33                            | 3501.69 | 109.803 | 4847   | 3 | 1167.90 | 0.42   |
| P17215 LIVJ_SALTY Leu/Ile/Val/Thr-binding protein | 7  | Carbamidomethyl+C(7) | YVIGHLCSSSTQPASDIYEDEGILM<br>ITPAATAPELTAR | 92  | 38 | 9  | 72.85  | b5b12b25b27y8y9y10y11y12                  | 4077.97 | 89.675  | 64810  | 3 | 1360.00 | -0.96  |
| P17215 LIVJ_SALTY Leu/Ile/Val/Thr-binding protein | 8  |                      | YILEK                                      | 151 | 5  | 1  | 13.14  | y4                                        | 665.38  | 36.718  | 12070  | 1 | 665.38  | -3.49  |
| P17215 LIVJ_SALTY Leu/Ile/Val/Thr-binding protein | 9  |                      | GFEFGVFDWHANGTATDAK                        | 346 | 19 | 3  | 21.76  | b3b7b9                                    | 2069.98 | 89.679  | 6600   | 2 | 1035.49 | 20.76  |
| P17215 LIVJ_SALTY Leu/Ile/Val/Thr-binding protein | 10 | Carbamidomethyl+C(6) | TLLAGCIALSLSHMAFADDIK                      | 4   | 21 | 6  | 35.63  | b9°b9b10y13°y13y14                        | 2247.20 | 95.094  | 4439   | 3 | 749.74  | 21.40  |
| P17215 LIVJ_SALTY Leu/Ile/Val/Thr-binding protein | 11 |                      | ENIDFVYYGGYHPMGQILR                        | 212 | 20 | 4  | 14.24  | b5b13*b13y8                               | 2401.12 | 94.098  | 3403   | 2 | 1201.06 | -4.07  |
| P17215 LIVJ_SALTY Leu/Ile/Val/Thr-binding protein | 12 |                      | QAVAVANKVVNDGIK                            | 77  | 15 | 3  | 24     | b7y5y6                                    | 1525.86 | 45.594  | 19086  | 2 | 763.44  | -4.56  |
| P17215 LIVJ_SALTY Leu/Ile/Val/Thr-binding protein | 13 |                      | KQDPSGAFVWTTYAALQSLQAGL<br>NHSDDPAEIAK     | 289 | 34 | 4  | 12.95  | b5b10y9y18                                | 3629.75 | 99.841  | 5121   | 3 | 1210.59 | -10.56 |
| P17215 LIVJ_SALTY Leu/Ile/Val/Thr-binding protein | 14 |                      | GDLKGFEFGVFDWHANGTATDA<br>K                | 342 | 23 | 4  | 19.94  | b10b12b20y15                              | 2483.17 | 92.082  | 5079   | 2 | 1242.09 | 3.93   |
| P17215 LIVJ_SALTY Leu/Ile/Val/Thr-binding protein | 15 |                      | QQYGEGLARAVQDGLK                           | 168 | 16 | 3  | 25.38  | b9b10b14                                  | 1732.88 | 90.338  | 3853   | 2 | 866.95  | -8.10  |
| P17215 LIVJ_SALTY Leu/Ile/Val/Thr-binding protein | 16 |                      | KENIDFVYYGGYHPMGQILR                       | 211 | 21 | 4  | 20.4   | b3°b3b9b11                                | 2529.25 | 138.262 | 1509   | 3 | 843.75  | 10.43  |
| P17215 LIVJ_SALTY Leu/Ile/Val/Thr-binding protein | 17 | Oxidation+M(16)      | KENIDFVYYGGYHPMGQILR                       | 211 | 21 | 6  | 29.48  | b11b12°b12b15y7y10                        | 2545.22 | 92.110  | 2009   | 4 | 637.06  | -0.10  |
| P0A1V4 KAD_SALTY Adenylate kinase                 | 1  |                      | VDGTQAVADVR                                | 195 | 11 | 6  | 47.25  | y2y6y8y9y10y11                            | 1130.58 | 36.382  | 56935  | 2 | 565.79  | -1.40  |
| P0A1V4 KAD_SALTY Adenylate kinase                 | 2  |                      | LVEYHQMTAPLIGYYQK                          | 167 | 17 | 11 | 66.05  | b2b4b6b8°b8b13b14y3y5y6y17                | 2054.03 | 69.528  | 52579  | 3 | 685.35  | -5.23  |
| P0A1V4 KAD_SALTY Adenylate kinase                 | 3  |                      | YGIPQISTGDMLR                              | 23  | 13 | 9  | 42.76  | b4b12°b12y2y3y7y10°y10y13                 | 1450.74 | 72.766  | 45831  | 2 | 725.87  | 3.03   |
| P0A1V4 KAD_SALTY Adenylate kinase                 | 4  |                      | NGFLLDGFPR                                 | 78  | 10 | 5  | 47.63  | b2b3b7b9y4                                | 1135.59 | 81.198  | 27626  | 2 | 568.30  | -3.44  |
| P0A1V4 KAD_SALTY Adenylate kinase                 | 5  |                      | GTQAQFIMEK                                 | 13  | 10 | 5  | 36.71  | b10y2y3y4y5                               | 1152.58 | 48.443  | 27562  | 2 | 576.79  | 7.10   |
| P0A1V4 KAD_SALTY Adenylate kinase                 | 6  |                      | IILLGAPGAGK                                | 2   | 11 | 6  | 55.62  | b2b3y4y5y7y9                              | 1009.63 | 60.973  | 26434  | 2 | 505.32  | -8.46  |
| P0A1V4 KAD_SALTY Adenylate kinase                 | 7  |                      | DDQEETVR                                   | 157 | 8  | 4  | 40.66  | y4y5°y5y7                                 | 991.45  | 36.784  | 7151   | 2 | 496.23  | 16.38  |
| P0A1V4 KAD_SALTY Adenylate kinase                 | 8  |                      | IILLGAPGAGKGTQAQFIMEK                      | 2   | 21 | 6  | 31.71  | b3y5y7y17°y17y19                          | 2143.19 | 72.893  | 25783  | 3 | 715.07  | -1.71  |
| P0A1V4 KAD_SALTY Adenylate kinase                 | 9  | Oxidation+M(11)      | YGIPQISTGDMLR                              | 23  | 13 | 4  | 29.41  | b10b12y4y7                                | 1466.74 | 63.124  | 7009   | 3 | 489.59  | 9.49   |
| P0A1V4 KAD_SALTY Adenylate kinase                 | 10 | Oxidation+M(7)       | LVEYHQMTAPLIGYYQK                          | 167 | 17 | 4  | 27.17  | b6b7b9y11                                 | 2070.01 | 110.014 | 2006   | 3 | 690.68  | -11.32 |
| P66038 RISB_SALTY 6                               | 1  |                      | IGQVKDDNITVVWVPGAYELPLA<br>TEALAK          | 40  | 29 | 12 | 53.02  | b3b4b9°b9b13b14°b14y2y4y15y16y29          | 3110.68 | 98.828  | 101552 | 3 | 1037.56 | 0.39   |
| P66038 RISB_SALTY 6                               | 2  |                      | FNQFINDSLLDGAVDALTR                        | 21  | 19 | 16 | 127.02 | b2b3b11b15y2y4y5y6y8y9y10y13y14y15°y15y19 | 2109.07 | 102.170 | 64398  | 2 | 1055.04 | 4.75   |
| P66038 RISB_SALTY 6                               | 3  |                      | ANVAAPDAR                                  | 5   | 9  | 9  | 74.47  | b2b3b4b8y2y5y6y7y9                        | 884.45  | 22.313  | 22578  | 2 | 442.73  | -13.53 |

|                                              |    |                       |                                              |     |    |    |        |                                          |         |         |        |   |         |        |
|----------------------------------------------|----|-----------------------|----------------------------------------------|-----|----|----|--------|------------------------------------------|---------|---------|--------|---|---------|--------|
| [P66038]RISB_SALTY 6                         | 4  |                       | DDNITVVVWPGAYELPLATEALAK                     | 45  | 24 | 4  | 12.61  | b7b12°b12y3                              | 2585.34 | 104.936 | 3027   | 2 | 1293.17 | -2.83  |
| [P66038]RISB_SALTY 6                         | 5  |                       | VAAPDAR                                      | 7   | 7  | 0  | 1.65   |                                          | 699.38  | 22.300  | 2312   | 1 | 699.38  | 7.94   |
| [P67904]RS10_SALTY 30S ribosomal protein S10 | 1  |                       | LIDQSTAEIVETAKR                              | 16  | 15 | 12 | 107.61 | b2b3y1y3y4y5y6y8y9y11y13y15              | 1673.89 | 52.144  | 191452 | 3 | 558.63  | -11.23 |
| [P67904]RS10_SALTY 30S ribosomal protein S10 | 2  |                       | LIDQSTAEIVETAK                               | 16  | 14 | 15 | 117.63 | b2b3b9°b9y4y5y8y9y10y11°y11y12°y12y13y14 | 1517.81 | 55.162  | 105411 | 2 | 759.41  | 2.33   |
| [P67904]RS10_SALTY 30S ribosomal protein S10 | 3  |                       | LVDIVEPTEK                                   | 72  | 10 | 7  | 57.76  | b2b3y4y6y7y8y10                          | 1142.63 | 51.571  | 49425  | 2 | 571.82  | -2.78  |
| [P67904]RS10_SALTY 30S ribosomal protein S10 | 4  |                       | FTVLISPHVNK                                  | 48  | 11 | 5  | 35.87  | y5y6°y6°y6y7                             | 1254.70 | 58.929  | 23033  | 3 | 418.91  | -14.59 |
| [P67904]RS10_SALTY 30S ribosomal protein S10 | 5  |                       | LDLAAGVDVQISLG                               | 89  | 14 | 3  | 24.55  | b5b6y11                                  | 1370.73 | 41.709  | 1867   | 3 | 457.58  | -18.17 |
| [P67904]RS10_SALTY 30S ribosomal protein S10 | 6  |                       | IVEPTEK                                      | 75  | 7  | 0  | 2.06   |                                          | 815.46  | 51.692  | 22380  | 1 | 815.46  | 11.98  |
| [P67904]RS10_SALTY 30S ribosomal protein S10 | 7  |                       | DQSTAEIVETAKR                                | 18  | 13 | 0  | 4.12   |                                          | 1447.73 | 52.124  | 6936   | 2 | 724.37  | -5.57  |
| [P02906]SUBI_SALTY Sulfate-binding protein   | 1  |                       | YLYSPEGQEIAAK                                | 263 | 13 | 11 | 82.86  | b2b4b10b11°b11y3y4y9y10y11y13            | 1468.74 | 50.370  | 66716  | 2 | 734.87  | 2.74   |
| [P02906]SUBI_SALTY Sulfate-binding protein   | 2  |                       | NVEVLDSGAR                                   | 183 | 10 | 5  | 33.7   | b1b2y4y5y8                               | 1059.54 | 39.982  | 41985  | 2 | 530.27  | -4.26  |
| [P02906]SUBI_SALTY Sulfate-binding protein   | 3  |                       | AQKDHFANGGTFDQISK                            | 311 | 17 | 8  | 22.7   | b1b4°b4°b4b11y10y12°y12                  | 1863.88 | 73.239  | 5963   | 2 | 932.44  | -10.02 |
| [P02906]SUBI_SALTY Sulfate-binding protein   | 4  |                       | FEIVTPSESILAEPTVSVVDK                        | 226 | 21 | 3  | 13.75  | b10y7y11                                 | 2260.23 | 77.505  | 56075  | 3 | 754.08  | 14.37  |
| [P02906]SUBI_SALTY Sulfate-binding protein   | 5  |                       | AVAEAYLK                                     | 255 | 8  | 3  | 32.88  | b5y5y6                                   | 864.48  | 92.526  | 13321  | 2 | 432.74  | -6.21  |
| [P02906]SUBI_SALTY Sulfate-binding protein   | 6  |                       | GIGDVLIAWENEALLATNELGK                       | 202 | 22 | 3  | 13.32  | b11b13y14                                | 2326.23 | 99.081  | 2727   | 3 | 776.08  | -1.05  |
| [P02906]SUBI_SALTY Sulfate-binding protein   | 7  |                       | WNYLAAWGYALHHNNNDQAKAQDFVK                   | 153 | 26 | 3  | 12.06  | b5b9y4                                   | 3074.51 | 136.224 | 6230   | 4 | 769.38  | 14.69  |
| [P02906]SUBI_SALTY Sulfate-binding protein   | 8  |                       | ELYEQYNKAFAHWK                               | 33  | 15 | 5  | 31.57  | b5b6y5°y5y7                              | 1913.94 | 118.031 | 1845   | 2 | 957.47  | 8.99   |
| [P0A1H3]EFG_SALTY Elongation factor G        | 1  |                       | VYSGVVNSGDTVLSNVK                            | 337 | 17 | 13 | 89.99  | b2b4°b4b5°b5b6y4y5y10y11y12y15y17        | 1737.90 | 61.972  | 81031  | 2 | 869.45  | -0.91  |
| [P0A1H3]EFG_SALTY Elongation factor G        | 2  |                       | IATDPFVGNLTFFR                               | 323 | 14 | 12 | 58.24  | b1b2b4y2y4y7°y7°y7y8y10y11y14            | 1597.84 | 93.579  | 64478  | 2 | 799.42  | 2.06   |
| [P0A1H3]EFG_SALTY Elongation factor G        | 3  |                       | SGPLAGYPVVDLGVR                              | 562 | 15 | 10 | 36.78  | b2b3b5°b5y1y2y4y8y10y15                  | 1499.83 | 76.554  | 60692  | 2 | 750.42  | 3.50   |
| [P0A1H3]EFG_SALTY Elongation factor G        | 4  | Carbamidomethyl+C(20) | AGDIAAAIGLKDVTTGDTLCDPENPIILER               | 378 | 30 | 4  | 11.32  | b26y3y10y30                              | 3138.60 | 85.369  | 28926  | 3 | 1046.87 | -0.62  |
| [P0A1H3]EFG_SALTY Elongation factor G        | 5  |                       | GQYGHVVIDMYPLEPGSNPK                         | 512 | 20 | 9  | 41.92  | b4y1y6°y6°y6y7y9y10°y10                  | 2201.06 | 70.661  | 28293  | 3 | 734.36  | -3.55  |
| [P0A1H3]EFG_SALTY Elongation factor G        | 6  |                       | EFNVEANVGKPVAYR                              | 475 | 16 | 6  | 24.03  | b7b11y6°y6y8y16                          | 1820.91 | 53.479  | 27039  | 3 | 607.64  | -7.91  |
| [P0A1H3]EFG_SALTY Elongation factor G        | 7  |                       | VEVETPEENTGDVIGDLR                           | 618 | 19 | 11 | 39.98  | b2°b2b5b10°b10°b10b11y3y5y14°y14         | 2058.99 | 66.598  | 25497  | 2 | 1030.00 | 5.22   |
| [P0A1H3]EFG_SALTY Elongation factor G        | 8  |                       | IGEVHDAATMDWMEQEQR                           | 39  | 20 | 6  | 21.03  | b4b10°b10b13°b13y2                       | 2332.03 | 73.033  | 8757   | 3 | 778.01  | 13.51  |
| [P0A1H3]EFG_SALTY Elongation factor G        | 9  |                       | AINWNDADQGVTFEYEDIPADMQLANEWHQNLIESAASEELMEK | 189 | 47 | 11 | 41.39  | b2b3b9b11y3y5y6y7°y7y9y29                | 5380.37 | 127.019 | 7212   | 4 | 1345.85 | -1.91  |
| [P0A1H3]EFG_SALTY Elongation factor G        | 10 |                       | LGANPVPLQLAIGAEEGFTGVVDLVK                   | 161 | 26 | 4  | 18.2   | b3b6°b6b19                               | 2607.42 | 120.780 | 26854  | 3 | 869.81  | -8.15  |
| [P0A1H3]EFG_SALTY Elongation factor G        | 11 |                       | VWTDDEESNQTHIAGMGELHLDIIVDR                  | 446 | 26 | 5  | 35.2   | b12b13b14°b14y15                         | 2954.41 | 136.700 | 24084  | 2 | 1477.71 | -15.70 |
| [P0A1H3]EFG_SALTY Elongation factor G        | 12 |                       | VVGQIK                                       | 153 | 6  | 2  | 13.55  | b4°b4                                    | 643.41  | 45.116  | 17104  | 1 | 643.41  | -1.80  |

|                                                |    |                                          |                                     |     |    |    |        |                                                             |         |         |        |   |         |        |
|------------------------------------------------|----|------------------------------------------|-------------------------------------|-----|----|----|--------|-------------------------------------------------------------|---------|---------|--------|---|---------|--------|
| P0A1H3 EFG_SALTY Elongation factor G           | 13 |                                          | IHAEVPLSEMGYATQLR                   | 653 | 18 | 3  | 15.44  | b9y3y8                                                      | 2062.06 | 96.311  | 10200  | 3 | 688.03  | 9.35   |
| P0A1H3 EFG_SALTY Elongation factor G           | 14 | Carbamidomethyl+C(9)                     | DVTTGDTLCDPENPIILER                 | 389 | 19 | 3  | 14.8   | b5b8y11                                                     | 2158.05 | 70.101  | 8458   | 2 | 1079.53 | 6.45   |
| P0A1H3 EFG_SALTY Elongation factor G           | 15 |                                          | GITITSAAATFAWSGMAK                  | 59  | 18 | 8  | 41.61  | b6b8b14°b14y4y8°y8y9                                        | 1813.90 | 90.093  | 3131   | 2 | 907.45  | -7.27  |
| P0A1H3 EFG_SALTY Elongation factor G           | 16 |                                          | TTTTERILFYTGVDNHK                   | 23  | 16 | 3  | 17     | b4b11y5                                                     | 1880.99 | 48.724  | 20090  | 3 | 627.67  | 0.13   |
| P0A1H3 EFG_SALTY Elongation factor G           | 17 |                                          | AKVTDIEGK                           | 495 | 9  | 4  | 45.18  | b7y3y6y7                                                    | 960.53  | 26.287  | 8773   | 2 | 480.77  | -9.79  |
| P0A1H3 EFG_SALTY Elongation factor G           | 18 |                                          | QSGGRGQYGHVVIDMYPLEPGSN<br>PK       | 507 | 25 | 3  | 22.8   | b12b14b15                                                   | 2686.31 | 136.624 | 8324   | 2 | 1343.66 | 2.73   |
| P0A1H3 EFG_SALTY Elongation factor G           | 19 | Carbamidomethyl+C(10)                    | VLDGAVMVYCAVGGVQPQSETV<br>WRQANK    | 104 | 28 | 8  | 34.87  | b3b11b14b15y4*y4y11y27                                      | 3062.48 | 123.891 | 5791   | 3 | 1021.50 | -12.12 |
| P0A1H3 EFG_SALTY Elongation factor G           | 20 |                                          | EDPSFRVWTDDESNQTIAGMGEL<br>HLDIIVDR | 440 | 32 | 3  | 22.07  | b11y23y24                                                   | 3685.79 | 81.883  | 4727   | 3 | 1229.27 | 3.05   |
| P0A1H3 EFG_SALTY Elongation factor G           | 21 |                                          | NIGISAHIDAGKTTTTER                  | 11  | 18 | 3  | 15.44  | b11y4y6                                                     | 1884.99 | 91.646  | 2955   | 2 | 943.00  | 4.53   |
| P0A1H3 EFG_SALTY Elongation factor G           | 22 | Carbamidomethyl+C(10)<br>;Oxidation+M(7) | VLDGAVMVYCAVGGVQPQSETV<br>WR        | 104 | 24 | 8  | 38.88  | b3°b3b6b10b14y6y9y11                                        | 2637.27 | 95.126  | 21294  | 3 | 879.76  | -4.44  |
| P0A1H3 EFG_SALTY Elongation factor G           | 23 | Oxidation+M(10)                          | GQYGHVVIDMYPLEPGSNPK                | 512 | 20 | 4  | 25.04  | b7b8b13y10                                                  | 2217.04 | 73.401  | 3468   | 3 | 739.69  | -10.02 |
| P0A1H3 EFG_SALTY Elongation factor G           | 24 |                                          | GQYGHVVIDMYPLEPGSN                  | 512 | 18 | 0  | 6.17   |                                                             | 1975.92 | 70.783  | 14598  | 3 | 659.31  | 0.56   |
| P66313 RL6_SALTY 50S ribosomal<br>protein L6   | 1  |                                          | APVVVPAGVDVK                        | 6   | 12 | 14 | 114.16 | b2b3b4b5y1y2y3y5y7°y7y8<br>y9y10y12                         | 1150.68 | 53.058  | 121761 | 2 | 575.84  | -5.73  |
| P66313 RL6_SALTY 50S ribosomal<br>protein L6   | 2  |                                          | TLNDAVEVK                           | 35  | 9  | 7  | 38.06  | b2°b2y2y6y7y8y9                                             | 988.52  | 38.326  | 107546 | 2 | 494.77  | -6.92  |
| P66313 RL6_SALTY 50S ribosomal<br>protein L6   | 3  |                                          | DGYADGWAQAGTAR                      | 55  | 14 | 9  | 42.08  | b3y1y4y6°y6y7y11*y11y14                                     | 1438.64 | 49.346  | 71996  | 2 | 719.82  | 3.14   |
| P66313 RL6_SALTY 50S ribosomal<br>protein L6   | 4  |                                          | INGQVITIK                           | 18  | 9  | 6  | 45.18  | b2b3y3y7y8y9                                                | 985.60  | 48.406  | 62820  | 2 | 493.30  | -5.33  |
| P66313 RL6_SALTY 50S ribosomal<br>protein L6   | 5  |                                          | ALLNSMVIGVTEGFTK                    | 69  | 16 | 8  | 65.59  | b2y3y5y6y7y9y11y16                                          | 1679.90 | 95.140  | 39072  | 2 | 840.45  | -0.80  |
| P66313 RL6_SALTY 50S ribosomal<br>protein L6   | 6  |                                          | GADKQVIGQVAADLR                     | 134 | 15 | 3  | 17.98  | b3y4y7                                                      | 1540.82 | 60.478  | 18032  | 3 | 514.28  | -12.68 |
| Q7CPL6 RL18_SALTY 50S ribosomal<br>protein L18 | 1  |                                          | VQALADAAR                           | 102 | 9  | 9  | 74.47  | b2b3*b3y3y4y5y6y7y9                                         | 914.50  | 31.535  | 145948 | 2 | 457.75  | -11.08 |
| Q7CPL6 RL18_SALTY 50S ribosomal<br>protein L18 | 2  |                                          | SGFQYHGR                            | 94  | 8  | 4  | 40.66  | y3y4y6y8                                                    | 951.45  | 28.503  | 6626   | 2 | 476.23  | 4.43   |
| Q7CPL6 RL18_SALTY 50S ribosomal<br>protein L18 | 3  |                                          | EAGLQF                              | 111 | 6  | 3  | 26.69  | b4°b4b5                                                     | 664.33  | 61.788  | 61704  | 1 | 664.33  | -2.94  |
| Q56073 DNAK_SALTY Chaperone<br>protein dnaK    | 1  |                                          | IINEPTAAALAYGLDKEVGNR               | 167 | 21 | 8  | 55.32  | b2b4y6y10y11y12y17y19                                       | 2215.16 | 74.885  | 48536  | 3 | 739.06  | -4.30  |
| Q56073 DNAK_SALTY Chaperone<br>protein dnaK    | 2  |                                          | SLGQFNLDGINPAPR                     | 452 | 15 | 19 | 127.21 | b2°b2b5°b5b8b12b14y1y4<br>y5y7*y7y8y10*y10y11*y1<br>1y13y15 | 1598.83 | 71.900  | 42021  | 2 | 799.92  | 1.60   |
| Q56073 DNAK_SALTY Chaperone<br>protein dnaK    | 3  |                                          | MQELAQVSQK                          | 587 | 10 | 7  | 39.85  | b2b7y5*y5y6y8y10                                            | 1161.59 | 36.990  | 26156  | 2 | 581.30  | -3.57  |
| Q56073 DNAK_SALTY Chaperone<br>protein dnaK    | 4  |                                          | ASSGLNEEEIQK                        | 502 | 12 | 10 | 78.72  | b1y4y5y7°y7y8y9y10°y10y<br>12                               | 1304.63 | 34.421  | 25353  | 2 | 652.82  | 0.09   |
| Q56073 DNAK_SALTY Chaperone<br>protein dnaK    | 5  |                                          | TAEDYLGEVPVTEAVITVPAYFNDA<br>QR     | 125 | 26 | 8  | 41.17  | b2b7y6y8y9y12y13y26                                         | 2869.40 | 93.600  | 19066  | 3 | 957.14  | 3.74   |
| Q56073 DNAK_SALTY Chaperone<br>protein dnaK    | 6  |                                          | NDPLAMQR                            | 253 | 8  | 3  | 40.66  | y4y6y7                                                      | 944.46  | 39.316  | 11163  | 2 | 472.74  | 2.07   |
| Q56073 DNAK_SALTY Chaperone<br>protein dnaK    | 7  |                                          | QAVTNPQNTLFAIK                      | 56  | 14 | 4  | 26.89  | b3b4*b4b7                                                   | 1544.85 | 67.229  | 10576  | 2 | 772.93  | 1.34   |



|                                                 |    |                       |                                             |     |    |   |       |                      |         |         |        |   |         |        |
|-------------------------------------------------|----|-----------------------|---------------------------------------------|-----|----|---|-------|----------------------|---------|---------|--------|---|---------|--------|
| Q56073 DNAK_SALTY Chaperone protein dnaK        | 8  |                       | LMEIAQQQHAQQAGSADASAN<br>NAKDDDVVDAEFEEVK   | 597 | 38 | 3 | 10.86 | b6b8y3               | 4100.88 | 89.683  | 8664   | 5 | 820.98  | 0.83   |
| Q56073 DNAK_SALTY Chaperone protein dnaK        | 9  | Carbamidomethyl+C(12) | IIGIDLGTNSCVAIMDGTQAR                       | 3   | 22 | 4 | 19.84 | y5y11y14*y14         | 2306.17 | 79.151  | 6400   | 2 | 1153.59 | 11.12  |
| Q56073 DNAK_SALTY Chaperone protein dnaK        | 10 |                       | DVNPDEAVAIGAAGVQGGVLTGD<br>VK               | 363 | 24 | 4 | 16.69 | b4b16y4y10           | 2295.16 | 104.217 | 62157  | 3 | 765.72  | -11.06 |
| Q56073 DNAK_SALTY Chaperone protein dnaK        | 11 |                       | TIAVYDLGGGTFDISIIEIDEVDGE<br>K              | 188 | 26 | 5 | 18.12 | b5y3y8°y8y11         | 2769.32 | 120.436 | 35092  | 3 | 923.78  | -18.42 |
| Q56073 DNAK_SALTY Chaperone protein dnaK        | 12 |                       | GMPQIEVTFDIDADGILHVS AK                     | 467 | 22 | 4 | 13.32 | b8°b8b13y13          | 2356.14 | 95.033  | 7896   | 4 | 589.79  | -17.82 |
| Q56073 DNAK_SALTY Chaperone protein dnaK        | 13 |                       | VLENAEGDR                                   | 25  | 9  | 4 | 30.28 | b5b7°b7y6            | 1002.47 | 126.495 | 1540   | 1 | 1002.47 | -13.52 |
| Q56073 DNAK_SALTY Chaperone protein dnaK        | 14 | Carbamidomethyl+C(15) | MGKIIIGIDLGTNSCVAIMDGTQA<br>R               | 0   | 25 | 3 | 21.86 | b16y18y19            | 2622.30 | 86.193  | 13132  | 2 | 1311.65 | -1.77  |
| Q56073 DNAK_SALTY Chaperone protein dnaK        | 15 |                       | FEELVQTRNQGDHLLHSTR                         | 528 | 19 | 3 | 22.58 | b9y11y12             | 2280.18 | 90.369  | 6351   | 3 | 760.73  | 12.63  |
| Q56073 DNAK_SALTY Chaperone protein dnaK        | 16 |                       | DVSIMPYKIIADNGDAWL DVK                      | 84  | 22 | 5 | 17.98 | b6°b6b16y12y14       | 2420.24 | 105.713 | 5801   | 4 | 605.81  | 8.07   |
| Q56073 DNAK_SALTY Chaperone protein dnaK        | 17 |                       | VALQDAGLSVSDINDVILVGGQT<br>RMPMVQK          | 321 | 30 | 4 | 16.39 | b5b12b16y8           | 3154.62 | 98.820  | 5666   | 3 | 1052.21 | -12.77 |
| Q56073 DNAK_SALTY Chaperone protein dnaK        | 18 |                       | ASDNKSLGQFNL DGINPAPR                       | 447 | 20 | 3 | 14.24 | b10b12y8             | 2114.06 | 65.159  | 4404   | 3 | 705.36  | -2.19  |
| Q7CPZ4 GRPE_SALTY Protein grpE                  | 1  |                       | FVNELLPVIDSLDR                              | 90  | 14 | 7 | 61.76 | b2b4b5y5y6y8y9       | 1629.89 | 97.421  | 45881  | 2 | 815.45  | 1.05   |
| Q7CPZ4 GRPE_SALTY Protein grpE                  | 2  |                       | IANLEVQLAE AQTR                             | 43  | 14 | 4 | 32.77 | b3b10y4y5            | 1555.83 | 63.229  | 24417  | 2 | 778.42  | -10.36 |
| Q7CPZ4 GRPE_SALTY Protein grpE                  | 3  |                       | TPEGQAPEEII MDQH EEEV AEPN<br>DSAEQV DPRDEK | 7   | 36 | 3 | 10.88 | b10b13y5             | 4060.84 | 63.093  | 4249   | 4 | 1015.96 | 3.91   |
| Q7CPZ4 GRPE_SALTY Protein grpE                  | 4  |                       | ANPDMAAMVEGIELTLK                           | 111 | 17 | 5 | 16.17 | b15°b15y14°y14y16    | 1802.91 | 79.488  | 52891  | 3 | 601.64  | 3.79   |
| P0A2M5 UPP_SALTY Uracil phohoribosyltransferase | 1  |                       | AGLGMMEGVLENVPSAR                           | 78  | 17 | 8 | 42.37 | b3b13y4y6°y6y7y12y17 | 1730.86 | 81.998  | 51825  | 2 | 865.94  | 4.58   |
| P0A2M5 UPP_SALTY Uracil phohoribosyltransferase | 2  |                       | VLVLVA APEGIAALEK                           | 155 | 16 | 6 | 44.16 | b2b3b4b5y9y11        | 1592.96 | 86.075  | 44562  | 2 | 796.99  | 1.61   |
| P0A2M5 UPP_SALTY Uracil phohoribosyltransferase | 3  |                       | NEETLEPVVPYFQK                              | 103 | 13 | 5 | 27.94 | b2y5y7y8y13          | 1593.78 | 65.268  | 18590  | 2 | 797.40  | 2.14   |
| P0A2M5 UPP_SALTY Uracil phohoribosyltransferase | 4  |                       | ITVVPILR                                    | 70  | 8  | 4 | 40.66 | y2y4y5y6             | 910.60  | 70.136  | 13932  | 2 | 455.81  | -4.29  |
| P0A2M5 UPP_SALTY Uracil phohoribosyltransferase | 5  |                       | ELASEVGSLLTYEATADLETEK                      | 29  | 22 | 4 | 17.98 | b7b9y7y10            | 2369.18 | 109.361 | 2428   | 2 | 1185.09 | 9.17   |
| P0A2M5 UPP_SALTY Uracil phohoribosyltransferase | 6  |                       | ELASEVGSLLTYEATADLETEKVT<br>IEGWNGPVEIDQIK  | 29  | 38 | 4 | 16.48 | b12°b12b15b20        | 4148.02 | 112.679 | 8728   | 4 | 1037.76 | -13.65 |
| P0A2M5 UPP_SALTY Uracil phohoribosyltransferase | 7  | Oxidation+M(4)        | LGLMRENDISTK                                | 14  | 12 | 3 | 22.09 | b6b8y5               | 1392.71 | 60.072  | 30922  | 3 | 464.91  | -3.59  |
| P60446 RL3_SALTY 50S ribosomal protein L3       | 1  |                       | VTVQSLDVVR                                  | 169 | 10 | 9 | 67.76 | y1y2y3y5y6y7*y7y8y10 | 1115.64 | 56.280  | 106677 | 2 | 558.32  | -2.52  |
| P60446 RL3_SALTY 50S ribosomal protein L3       | 2  |                       | IFTEDGV SIPVTVIEVEANR                       | 13  | 20 | 8 | 51.46 | b2y3y4y5*y5y6y15y20  | 2188.16 | 88.328  | 90418  | 2 | 1094.58 | 4.69   |
| P60446 RL3_SALTY 50S ribosomal protein L3       | 3  | Carbamidomethyl+C(9)  | GGVPGATGCDLIVKPAVK                          | 190 | 18 | 4 | 15.44 | b7y4y15y18           | 1738.93 | 53.961  | 24358  | 3 | 580.32  | -10.39 |
| P60446 RL3_SALTY 50S ribosomal protein L3       | 4  |                       | MAGQMGNER                                   | 160 | 9  | 6 | 38.06 | b2y4y7*y7y8y9        | 993.42  | 20.252  | 22028  | 2 | 497.22  | -0.55  |
| P60446 RL3_SALTY 50S ribosomal protein L3       | 5  |                       | AVQVTTGAK                                   | 46  | 9  | 7 | 38.06 | b2y5y6y7°y7*y7y9     | 874.49  | 21.672  | 12415  | 2 | 437.75  | -8.17  |
| P60446 RL3_SALTY 50S ribosomal protein L3       | 6  |                       | VPGSIGQNQTPGK                               | 141 | 13 | 4 | 29.7  | b4b6b12°b12          | 1282.66 | 65.264  | 2460   | 3 | 428.23  | -8.66  |
| P60446 RL3_SALTY 50S ribosomal protein L3       | 7  | Carbamidomethyl+C(9)  | GGVPGATGCDLIVKPAVKA                         | 190 | 19 | 6 | 46.52 | b3b4y5y7y8y12        | 1809.97 | 56.114  | 104804 | 3 | 604.00  | -9.10  |

|                                                      |    |                       |                                          |     |    |    |       |                                  |         |         |       |   |         |        |
|------------------------------------------------------|----|-----------------------|------------------------------------------|-----|----|----|-------|----------------------------------|---------|---------|-------|---|---------|--------|
| P60446 RL3_SALTY 50S ribosomal protein L3            | 8  |                       | QVTTGAK                                  | 48  | 7  | 0  | 1.65  |                                  | 704.39  | 21.688  | 3562  | 1 | 704.39  | 1.39   |
| P26982 DEGP_SALTY Protease do                        | 1  |                       | AGDVITSLNGKPISSFAALR                     | 332 | 20 | 8  | 49.28 | b3b4b9y1y4y7y9y15                | 2017.09 | 75.028  | 47066 | 3 | 673.04  | -8.35  |
| P26982 DEGP_SALTY Protease do                        | 2  |                       | GAFVSQVMPNSSAAK                          | 313 | 15 | 11 | 70.17 | b3b4b7*b7y1y8y9y10y11*y1y15      | 1493.75 | 53.077  | 33357 | 2 | 747.38  | 2.94   |
| P26982 DEGP_SALTY Protease do                        | 3  |                       | SDIALIQIQNPK                             | 160 | 12 | 5  | 26.07 | b3b4y6*y6y12                     | 1339.76 | 63.900  | 30498 | 2 | 670.38  | -0.18  |
| P26982 DEGP_SALTY Protease do                        | 4  |                       | AQVGTMPVGSK                              | 352 | 11 | 9  | 50.26 | b1b2*b2y3y5y8*y8y9y11            | 1074.56 | 34.521  | 26710 | 2 | 537.78  | -2.73  |
| P26982 DEGP_SALTY Protease do                        | 5  |                       | VGDYTV AIGNPFGLGETVTSIGIVS<br>ALGR       | 186 | 28 | 14 | 81.06 | b3b6*b6b8b11y2y3y4y5y6y8y9y14y28 | 2750.41 | 117.284 | 22774 | 3 | 917.47  | -9.50  |
| P26982 DEGP_SALTY Protease do                        | 6  |                       | ANSPAAQIGLK                              | 418 | 11 | 6  | 41.05 | b1b7b8y9y10y11                   | 1069.60 | 45.665  | 16772 | 2 | 535.30  | -1.83  |
| P26982 DEGP_SALTY Protease do                        | 7  |                       | SGLNVENYENFIQTDAAINR                     | 214 | 20 | 5  | 19.56 | b3b5*b5y3y7                      | 2268.11 | 77.482  | 7677  | 2 | 1134.56 | 7.53   |
| P26982 DEGP_SALTY Protease do                        | 8  |                       | GELGIMGTELNSELAK                         | 289 | 16 | 4  | 27.43 | b4b8b13y12                       | 1661.83 | 64.826  | 3374  | 3 | 554.61  | -8.89  |
| P26982 DEGP_SALTY Protease do                        | 9  |                       | RGELGIMGTELNSELAK                        | 288 | 17 | 4  | 16.17 | b9b12*b12y13                     | 1817.96 | 86.475  | 2744  | 2 | 909.48  | 9.94   |
| P26982 DEGP_SALTY Protease do                        | 10 | Oxidation+M(6)        | NLTSMQMV EYGQVK                          | 275 | 13 | 3  | 25.23 | b9y6y7                           | 1512.75 | 38.922  | 27716 | 3 | 504.92  | 7.34   |
| P26982 DEGP_SALTY Protease do                        | 11 | Oxidation+M(6)        | GELGIMGTELNSELAK                         | 289 | 16 | 4  | 17    | b11y10y12*y12                    | 1677.84 | 68.032  | 8884  | 3 | 559.95  | 0.22   |
| P26982 DEGP_SALTY Protease do                        | 12 | Oxidation+M(8)        | GAFVSQVMPNSSAAK                          | 313 | 15 | 4  | 37.59 | b9b10y7y8                        | 1509.75 | 94.963  | 4507  | 2 | 755.38  | 6.79   |
| P26982 DEGP_SALTY Protease do                        | 13 |                       | ANSPAAQIGL                               | 418 | 10 | 0  | 2.47  |                                  | 941.49  | 45.554  | 2209  | 2 | 471.25  | -12.25 |
| P66692 RPIA_SALTY Ribose-5-phohate isomerase A       | 1  | Carbamidomethyl+C(3)  | FICIADASK                                | 112 | 9  | 6  | 54.21 | b2y3y4y5y7y9                     | 1024.51 | 50.916  | 27888 | 2 | 512.76  | -3.57  |
| P66692 RPIA_SALTY Ribose-5-phohate isomerase A       | 2  |                       | GADVALIGTPDGVK                           | 201 | 14 | 8  | 44.94 | b5b6y1y2y3y5y7y14                | 1312.71 | 57.088  | 26343 | 2 | 656.86  | -1.58  |
| P66692 RPIA_SALTY Ribose-5-phohate isomerase A       | 3  |                       | GQIEGAVSSSDASTEK                         | 43  | 16 | 5  | 25.38 | b2*b2y9y12y13                    | 1565.73 | 31.461  | 8433  | 2 | 783.37  | 2.11   |
| P66692 RPIA_SALTY Ribose-5-phohate isomerase A       | 4  |                       | AVGWAA LQYVQPGTIVGVGTGST<br>AAHFIDALGTMK | 8   | 35 | 5  | 22.98 | b17*b17b18b20*b20                | 3487.75 | 136.830 | 7899  | 2 | 1744.38 | -15.82 |
| P66692 RPIA_SALTY Ribose-5-phohate isomerase A       | 5  |                       | MTQDELK                                  | 0   | 7  | 7  | 50.38 | b6y4*y4y5*y5*y5y6                | 864.42  | 136.293 | 2085  | 1 | 864.42  | 6.43   |
| P66692 RPIA_SALTY Ribose-5-phohate isomerase A       | 6  |                       | GQIEGAVSSSDASTEKLK                       | 43  | 18 | 7  | 28.93 | b4*b4*b4b11*b11y10y11            | 1806.92 | 38.946  | 2402  | 2 | 903.97  | 8.99   |
| P63411 ACKA_SALTY Acetate kinase                     | 1  | Carbamidomethyl+C(19) | FAIIDAVNGDEYLSGLAECFHLPE<br>AR           | 17  | 26 | 5  | 27.32 | y2y4y7y8y19                      | 2907.42 | 105.416 | 39478 | 3 | 969.81  | 6.05   |
| P63411 ACKA_SALTY Acetate kinase                     | 2  |                       | EGTRPAVVIPTNEELVIAQDASR                  | 374 | 23 | 13 | 82.05 | b2b8b9b15y3*y3y6y7y8y9y12y14y23  | 2465.29 | 68.926  | 29431 | 3 | 822.44  | -3.66  |
| P63411 ACKA_SALTY Acetate kinase                     | 3  |                       | LDVAVFTGGIGENAAMVR                       | 324 | 18 | 8  | 41.61 | b5b8b15*b15y10y11y13y18          | 1819.92 | 93.883  | 23022 | 2 | 910.46  | -9.79  |
| P63411 ACKA_SALTY Acetate kinase                     | 4  | Carbamidomethyl+C(1)  | CVDTSMGLTPLEGLVMGTR                      | 224 | 19 | 9  | 47.58 | b15*b15y1y3y4y7*y7y8y10          | 2037.00 | 94.972  | 22616 | 2 | 1019.00 | 9.95   |
| P63411 ACKA_SALTY Acetate kinase                     | 5  |                       | YIGSYTALMDGR                             | 312 | 12 | 6  | 44.65 | b1y2y5y8y9y10                    | 1346.65 | 64.741  | 8544  | 2 | 673.83  | 9.88   |
| P63411 ACKA_SALTY Acetate kinase                     | 6  |                       | SGFINKEGTRPAVVIPTNEELVIAQ<br>DASR        | 368 | 29 | 3  | 11.47 | b11y7y26                         | 3111.63 | 103.366 | 4427  | 3 | 1037.88 | -5.88  |
| P63411 ACKA_SALTY Acetate kinase                     | 7  | Carbamidomethyl+C(14) | ESGLLGLTEVTSDCR                          | 272 | 15 | 6  | 62.04 | y7y8y9*y9y10y11                  | 1636.79 | 71.765  | 21427 | 2 | 818.90  | 4.10   |
| P63411 ACKA_SALTY Acetate kinase                     | 8  |                       | NVAVFDTA FHQTMPEESYLYALP<br>YSLYK        | 144 | 28 | 5  | 22.18 | b14*b14y5y6y8                    | 3297.60 | 99.643  | 10622 | 3 | 1099.87 | 4.22   |
| P63411 ACKA_SALTY Acetate kinase                     | 9  |                       | YTSSVVIDESVIOGIK                         | 98  | 16 | 3  | 25.38 | b4b5b11                          | 1737.89 | 113.103 | 1784  | 2 | 869.45  | -18.61 |
| P63411 ACKA_SALTY Acetate kinase                     | 10 |                       | YGAHGTSHFYVTQEAAK                        | 178 | 17 | 3  | 16.17 | b14y5y13                         | 1866.85 | 93.643  | 1765  | 3 | 622.96  | -14.25 |
| P63411 ACKA_SALTY Acetate kinase                     | 11 |                       | NEELVIAQDASR                             | 385 | 12 | 0  | 7.41  |                                  | 1344.66 | 68.902  | 25126 | 2 | 672.84  | -8.26  |
| Q8ZKQ1 LSRB_SALTY Autoinducer 2-binding protein lsrB | 1  |                       | AYPDLDAIIAPDANALPAAAQAAE<br>NLKR         | 209 | 28 | 6  | 20.3  | b2b8b14y4y12y19                  | 2863.49 | 87.656  | 63080 | 3 | 955.17  | -1.53  |
| Q8ZKQ1 LSRB_SALTY Autoinducer 2-binding protein lsrB | 2  |                       | VAFFYSSPTVTDQNQWVK                       | 154 | 18 | 7  | 36.36 | b2b12y2y11y12y13y18              | 2117.05 | 77.666  | 41147 | 2 | 1059.03 | 6.69   |
| Q8ZKQ1 LSRB_SALTY Autoinducer 2-binding protein lsrB | 3  |                       | LVGVGFFTSGGNGAQEAGK                      | 35  | 19 | 10 | 61.05 | b2b15b16y2y5y14y15y17*y17y18     | 1795.90 | 71.511  | 33641 | 2 | 898.45  | 2.92   |

|                                                         |    |                       |                                |     |    |    |        |                                                     |         |         |        |   |         |        |
|---------------------------------------------------------|----|-----------------------|--------------------------------|-----|----|----|--------|-----------------------------------------------------|---------|---------|--------|---|---------|--------|
| Q8ZKQ1 LSRB_SALTY Autoinducer 2-binding protein lsrB    | 4  |                       | NMPMNVGDSLDPGIGK               | 284 | 17 | 7  | 16.17  | b2b12°b12y5y15*y15y17                               | 1757.87 | 79.551  | 32801  | 2 | 879.44  | 6.04   |
| Q8ZKQ1 LSRB_SALTY Autoinducer 2-binding protein lsrB    | 5  |                       | VTVSPNSEQGYHYEAK               | 301 | 16 | 8  | 34.46  | b6b9°b9y2y4y7y13y16                                 | 1808.83 | 36.385  | 32594  | 3 | 603.61  | -10.87 |
| Q8ZKQ1 LSRB_SALTY Autoinducer 2-binding protein lsrB    | 6  |                       | NNLAIVGFSTPNVMRPYVQR           | 237 | 20 | 6  | 19.56  | b1b11b13y4*y4y7                                     | 2276.17 | 77.580  | 23309  | 4 | 569.80  | -12.01 |
| Q8ZKQ1 LSRB_SALTY Autoinducer 2-binding protein lsrB    | 7  |                       | VTVSPNSEQGYHYEAKGNGIVLLPER     | 301 | 26 | 3  | 35.28  | b7b8b9                                              | 2857.48 | 59.943  | 28701  | 4 | 715.13  | 10.94  |
| Q8ZKQ1 LSRB_SALTY Autoinducer 2-binding protein lsrB    | 8  |                       | SYIINQGTQPKQLGSMLVEMAAHQVDK    | 124 | 26 | 3  | 18.2   | b4b11b14                                            | 2908.42 | 110.548 | 3882   | 4 | 727.86  | -3.27  |
| P0A9Y9 CC_SALTY Cold shock-like protein cC              | 1  |                       | GFGFITPADGSK                   | 15  | 12 | 22 | 165.93 | b2b3b4b5b6°b6b8y1y2y3°y3y4°y4y5y6°y6y7°y7y8y9y10y12 | 1196.59 | 64.262  | 526750 | 2 | 598.80  | -1.84  |
| P0A9Y9 CC_SALTY Cold shock-like protein cC              | 2  |                       | DVVFVHFSAIQGNGFK               | 27  | 15 | 6  | 36.78  | b8b12b13y6y9°y9                                     | 1665.83 | 74.266  | 39353  | 3 | 555.95  | -7.91  |
| P0A9Y9 CC_SALTY Cold shock-like protein cC              | 3  |                       | GPAAVNVTAI                     | 59  | 10 | 6  | 47.63  | b2b3b7b9y6y10                                       | 912.51  | 59.410  | 32846  | 1 | 912.51  | -4.35  |
| P0A9Y9 CC_SALTY Cold shock-like protein cC              | 4  |                       | TLAEGQNVEFEIQDGQK              | 42  | 17 | 4  | 36.71  | b8b9b10y10                                          | 1905.93 | 54.957  | 4666   | 2 | 953.47  | 5.96   |
| P0A9Y9 CC_SALTY Cold shock-like protein cC              | 5  |                       | TLAEGQNVEFEIQDGQKGPAAVNVTAI    | 42  | 27 | 4  | 21.83  | b13*b13y15y16                                       | 2799.38 | 136.662 | 11549  | 2 | 1400.19 | -13.69 |
| P0A9Y9 CC_SALTY Cold shock-like protein cC              | 6  |                       | TPADGSK                        | 20  | 7  | 2  | 21.38  | b4b5                                                | 675.33  | 64.334  | 4640   | 1 | 675.33  | 4.16   |
| P0A9Y9 CC_SALTY Cold shock-like protein cC              | 7  |                       | GFITPADGSK                     | 17  | 10 | 1  | 7.57   | b3                                                  | 992.50  | 64.243  | 2735   | 1 | 992.50  | -1.05  |
| Q8ZRN1 METQ_SALTY D-methionine-binding lipoprotein metQ | 1  |                       | DGIFVEDKDSPLYVNLIVTREDNK       | 215 | 23 | 3  | 12.94  | b6y5y7                                              | 2666.35 | 63.865  | 22045  | 4 | 667.34  | 7.42   |
| Q8ZRN1 METQ_SALTY D-methionine-binding lipoprotein metQ | 2  |                       | DGIFVEDKDSPLYVNLIVTREDNKDAENVK | 215 | 29 | 4  | 17.42  | y2y6y8y11                                           | 3322.62 | 70.457  | 21072  | 4 | 831.41  | -7.27  |
| Q8ZRN1 METQ_SALTY D-methionine-binding lipoprotein metQ | 3  |                       | SLDELKDGSQVAVPNDPTNLGR         | 122 | 22 | 4  | 24.03  | b13y6y7y9                                           | 2325.17 | 57.885  | 16215  | 3 | 775.73  | 1.16   |
| Q8ZRN1 METQ_SALTY D-methionine-binding lipoprotein metQ | 4  |                       | IVELEAPQLPR                    | 178 | 11 | 3  | 27.12  | b3y5y6                                              | 1264.73 | 65.985  | 11037  | 2 | 632.87  | 5.69   |
| Q8ZRN1 METQ_SALTY D-methionine-binding lipoprotein metQ | 5  |                       | YGLDVELVTFNDYVLPNEALSK         | 56  | 22 | 5  | 30.01  | b5y6y10y13y14                                       | 2499.29 | 103.880 | 21967  | 3 | 833.77  | 8.50   |
| Q8ZRN1 METQ_SALTY D-methionine-binding lipoprotein metQ | 6  |                       | FVQAYQSDEVYEAANK               | 245 | 16 | 3  | 17     | b6b8y11                                             | 1861.88 | 81.870  | 5344   | 3 | 621.30  | 8.06   |
| Q8ZRN1 METQ_SALTY D-methionine-binding lipoprotein metQ | 7  |                       | VGLIK                          | 151 | 5  | 2  | 26.28  | b3y4                                                | 529.37  | 26.148  | 3429   | 1 | 529.37  | -0.58  |
| Q8ZRN1 METQ_SALTY D-methionine-binding lipoprotein metQ | 8  | Carbamidomethyl+C(17) | TFAAVGALIGSLALAGCGQDEK         | 6   | 22 | 4  | 24.03  | b5y4y12y13                                          | 2149.06 | 96.109  | 2757   | 3 | 717.03  | -16.36 |
| Q8ZRN1 METQ_SALTY D-methionine-binding lipoprotein metQ | 9  |                       | DGSQVAVPNDPTNLGR               | 128 | 16 | 3  | 23.54  | b9y10y11                                            | 1639.80 | 72.953  | 2734   | 2 | 820.40  | -4.47  |
| Q8ZRN1 METQ_SALTY D-methionine-binding lipoprotein metQ | 10 |                       | KFVQAYQSDEVYEAANK              | 244 | 17 | 4  | 16.17  | b12*b12y3y7                                         | 1989.97 | 76.445  | 49302  | 2 | 995.49  | 6.56   |
| Q8ZRN1 METQ_SALTY D-methionine-binding lipoprotein metQ | 11 |                       | FVQAYQSDEVYEAANKVFNGGAVK       | 245 | 24 | 4  | 25.98  | b6b7y5y22                                           | 2634.30 | 77.530  | 41101  | 3 | 878.77  | 6.86   |

|                                                                          |    |                      |                                |     |    |    |       |                                   |         |         |       |   |         |        |
|--------------------------------------------------------------------------|----|----------------------|--------------------------------|-----|----|----|-------|-----------------------------------|---------|---------|-------|---|---------|--------|
| Q8ZRN1 METQ_SALTY D-methionine-binding lipoprotein metQ                  | 12 | Phosphoryl STY(18)   | DGIFVEDKDSPYVNLIVTREDNKD AENVK | 215 | 29 | 6  | 21.88 | b15_HPO3<br>b15°b15b16*b16y13*y13 | 3402.58 | 136.764 | 7263  | 2 | 1701.79 | -5.81  |
| P65889 PUR7_SALTY Phohoribosylaminoimidazole-succinocarboxamide synthase | 1  |                      | LAEAGIPTQMER                   | 60  | 12 | 6  | 47.79 | b4b5y6y9y10y12                    | 1315.67 | 49.659  | 41709 | 2 | 658.34  | 2.23   |
| P65889 PUR7_SALTY Phohoribosylaminoimidazole-succinocarboxamide synthase | 2  | Carbamidomethyl+C(7) | LLSDTECLVK                     | 72  | 10 | 6  | 33.7  | b2y5y7y8°y8y10                    | 1177.61 | 53.223  | 37180 | 2 | 589.31  | -1.24  |
| P65889 PUR7_SALTY Phohoribosylaminoimidazole-succinocarboxamide synthase | 3  |                      | TVYSTENPDLLVLEFR               | 13  | 16 | 10 | 41.66 | b4°b4b5°b5b12*b12y1y3y4y16        | 1895.98 | 88.759  | 27352 | 2 | 948.49  | 2.12   |
| P65889 PUR7_SALTY Phohoribosylaminoimidazole-succinocarboxamide synthase | 4  |                      | IEQFDRK                        | 39  | 7  | 3  | 37.24 | b3b4y6                            | 935.49  | 26.418  | 12174 | 2 | 468.25  | -7.83  |
| P65889 PUR7_SALTY Phohoribosylaminoimidazole-succinocarboxamide synthase | 5  |                      | NDTSAGDGAR                     | 29  | 10 | 5  | 52.2  | b3b9y3y7y8                        | 963.42  | 80.653  | 3597  | 2 | 482.21  | 7.60   |
| P65889 PUR7_SALTY Phohoribosylaminoimidazole-succinocarboxamide synthase | 6  |                      | QSLGGLIEAYEAVHR                | 215 | 16 | 4  | 30.56 | b7b8y3y6                          | 1713.89 | 137.475 | 2538  | 2 | 857.45  | 1.50   |
| P65889 PUR7_SALTY Phohoribosylaminoimidazole-succinocarboxamide synthase | 7  | Carbamidomethyl+C(8) | LEMVPVECVVR                    | 83  | 11 | 3  | 24.11 | b3b5y4                            | 1330.70 | 82.013  | 1669  | 2 | 665.85  | 9.08   |
| P65889 PUR7_SALTY Phohoribosylaminoimidazole-succinocarboxamide synthase | 8  |                      | GMVNNKFNFHIMTK                 | 46  | 14 | 3  | 19.11 | b8b12y13                          | 1680.83 | 102.208 | 28053 | 3 | 560.95  | -1.60  |
| P65889 PUR7_SALTY Phohoribosylaminoimidazole-succinocarboxamide synthase | 9  |                      | TVYSTENPDLLVLEFRNDTSAGD GAR    | 13  | 26 | 4  | 12.06 | b12°b12b24y13                     | 2840.34 | 136.666 | 14925 | 2 | 1420.67 | -10.49 |
| P65889 PUR7_SALTY Phohoribosylaminoimidazole-succinocarboxamide synthase | 10 |                      | LEFGLYKGEVVLGDEFSPDGSR         | 177 | 22 | 3  | 22.07 | b6y6y7                            | 2414.16 | 93.801  | 2477  | 2 | 1207.58 | -12.24 |
| P65889 PUR7_SALTY Phohoribosylaminoimidazole-succinocarboxamide synthase | 11 |                      | ETLDKMDK                       | 203 | 8  | 4  | 32.88 | b4°b4y4y5                         | 979.48  | 119.291 | 2020  | 1 | 979.48  | 1.43   |
| Q8ZPD6 YNCE_SALTY Uncharacterized protein yncE                           | 1  |                      | TFDTPTYPNSLALSADGK             | 308 | 18 | 6  | 32.45 | b4b7y11y13y14y18                  | 1897.94 | 65.320  | 20471 | 2 | 949.47  | 9.07   |
| Q8ZPD6 YNCE_SALTY Uncharacterized protein yncE                           | 2  |                      | LYTTNADGEFITIDTASNK            | 198 | 19 | 3  | 22.58 | b12y12y13                         | 2074.01 | 65.225  | 16166 | 2 | 1037.51 | 7.06   |
| Q8ZPD6 YNCE_SALTY Uncharacterized protein yncE                           | 3  |                      | LLDDGKEHFFINLSLDTAGHR          | 223 | 21 | 10 | 57.15 | b3°b3b4b5b6°b6b8y7y9y21           | 2398.19 | 82.573  | 15823 | 2 | 1199.60 | -11.81 |
| Q8ZPD6 YNCE_SALTY Uncharacterized protein yncE                           | 4  |                      | MSTGLALDSK                     | 185 | 10 | 4  | 39.06 | b5b9y3y6                          | 1022.51 | 45.931  | 16211 | 2 | 511.76  | -4.18  |
| Q8ZPD6 YNCE_SALTY Uncharacterized protein yncE                           | 5  |                      | EQEATQPDDVIR                   | 338 | 12 | 3  | 22.09 | b7b11y6                           | 1400.69 | 36.363  | 2121  | 3 | 467.57  | 14.21  |
| Q8ZL56 GPMI_SALTY 2                                                      | 1  |                      | TFFANPVLTVNAVDQAK              | 91  | 16 | 6  | 17    | b1b7°b7y4y7y16                    | 1735.91 | 76.704  | 40106 | 2 | 868.46  | 3.16   |
| Q8ZL56 GPMI_SALTY 2                                                      | 2  |                      | LSDIAPTMLSLMGMEIPQEMTGKPLFIVE  | 485 | 29 | 9  | 32.71 | b2b3b5b7°b7b8b14y1y2              | 3191.62 | 122.198 | 19016 | 3 | 1064.54 | 1.30   |
| Q8ZL56 GPMI_SALTY 2                                                      | 3  |                      | VATYDLQPEMSSAELTEK             | 364 | 18 | 11 | 55.13 | b1b3°b3b7b8b9b11y2y11y17y18       | 2011.97 | 62.995  | 16498 | 2 | 1006.49 | 9.95   |
| Q8ZL56 GPMI_SALTY 2                                                      | 4  |                      | TAVAYPPASLANTFGEWMAK           | 303 | 20 | 5  | 22.41 | b7y5y7y15y20                      | 2125.06 | 96.041  | 15881 | 2 | 1063.03 | 6.43   |
| Q8ZL56 GPMI_SALTY 2                                                      | 5  | Carbamidomethyl+C(8) | AVEALDNCIEQVTK                 | 416 | 14 | 10 | 42.08 | b7°b7b9°b9b11°b11°b11b12y5y14     | 1589.80 | 50.617  | 14893 | 2 | 795.40  | 9.21   |
| Q8ZL56 GPMI_SALTY 2                                                      | 6  |                      | IVYQDLTR                       | 75  | 8  | 6  | 53.8  | b4b7y4°y4y6y8                     | 1007.55 | 46.479  | 8638  | 2 | 504.28  | -4.24  |
| Q8ZL56 GPMI_SALTY 2                                                      | 7  |                      | KPMVLVILDGYGYR                 | 5   | 14 | 3  | 19.11 | b3y4y7                            | 1623.91 | 102.296 | 8521  | 2 | 812.46  | 12.85  |
| Q8ZL56 GPMI_SALTY 2                                                      | 8  |                      | AVESVGGQLLITADHGNAEQMR         | 430 | 22 | 3  | 13.32 | b4b15y6                           | 2296.12 | 82.710  | 4716  | 3 | 766.05  | -5.95  |

|                                                                                     |    |                                          |                                                          |     |    |    |       |                                         |         |         |        |   |         |        |
|-------------------------------------------------------------------------------------|----|------------------------------------------|----------------------------------------------------------|-----|----|----|-------|-----------------------------------------|---------|---------|--------|---|---------|--------|
| Q8ZL56 GPMI_SALTY 2                                                                 | 9  |                                          | TPVMDALWAKRPHTLIDASGLEV<br>GLPDR                         | 31  | 28 | 4  | 11.63 | b3y1y4y7                                | 3058.59 | 137.677 | 4381   | 4 | 765.40  | -7.90  |
| Q8ZL56 GPMI_SALTY 2                                                                 | 10 |                                          | VVNLNFVMLTEYAADIK                                        | 286 | 17 | 3  | 23.16 | b12y11y12                               | 1940.04 | 118.202 | 3334   | 3 | 647.35  | 11.77  |
| Q8ZL56 GPMI_SALTY 2                                                                 | 11 |                                          | AVHIMGLLSAGGVHSHEDHIMAM<br>VELAAER                       | 111 | 30 | 3  | 17.23 | y4y12y14                                | 3181.59 | 97.075  | 5875   | 3 | 1061.20 | 5.29   |
| Q8ZL56 GPMI_SALTY 2                                                                 | 12 |                                          | DPATGQAHTAHTNLPVPLIYVGE<br>K                             | 452 | 24 | 3  | 12.61 | b5b11y4                                 | 2529.27 | 47.290  | 4055   | 3 | 843.76  | -15.35 |
| Q8ZL56 GPMI_SALTY 2                                                                 | 13 |                                          | YAHVTFFNGGVVEEPFAGEER                                    | 336 | 21 | 10 | 60.45 | b3b4b5°b5b10y5y7y13y14<br>*y14          | 2403.13 | 95.024  | 4039   | 3 | 801.72  | 12.39  |
| Q8ZL56 GPMI_SALTY 2                                                                 | 14 |                                          | AFVNADFDGFARK                                            | 272 | 13 | 3  | 25.23 | b5b6y6                                  | 1457.71 | 50.454  | 2558   | 3 | 486.57  | -6.11  |
| Q8ZL56 GPMI_SALTY 2                                                                 | 15 | Oxidation+M(8)                           | VVNLNFVMLTEYAADIK                                        | 286 | 17 | 3  | 16.17 | b13y7y10                                | 1956.03 | 73.602  | 110274 | 2 | 978.52  | 7.99   |
| Q8ZL56 GPMI_SALTY 2                                                                 | 16 | Oxidation+M(21)                          | AVESVGGQLLITADHGNAEQMR                                   | 430 | 22 | 3  | 13.32 | b4b8y13                                 | 2312.13 | 81.050  | 19727  | 3 | 771.38  | -1.80  |
| Q8ZL56 GPMI_SALTY 2                                                                 | 17 | Oxidation+M(20)                          | LSDIAPTMLSLMGMEIPQEMTGKP<br>LFIVE                        | 485 | 29 | 3  | 17.42 | b3b9b15                                 | 3207.58 | 73.007  | 4001   | 5 | 642.32  | -7.69  |
| Q8ZL56 GPMI_SALTY 2                                                                 | 18 |                                          | ATYDLQPEMSSAELTEK                                        | 365 | 17 | 0  | 5.35  |                                         | 1912.86 | 63.003  | 21940  | 3 | 638.29  | -14.42 |
| P69936 YDFG_SALTY NADP-dependent<br>L-serine/L-allo-threonine dehydrogenase<br>ydfG | 1  |                                          | VTDIEPGLVGGTEFSSVR                                       | 171 | 18 | 11 | 49.04 | b2b7°b7y6°y6y7y9y13y14°<br>y14y18       | 1862.96 | 69.004  | 27792  | 2 | 931.99  | 7.08   |
| P69936 YDFG_SALTY NADP-dependent<br>L-serine/L-allo-threonine dehydrogenase<br>ydfG | 2  |                                          | AVLPGMVER                                                | 115 | 9  | 4  | 38.06 | y4y5y6y9                                | 971.53  | 52.983  | 21435  | 2 | 486.27  | -3.77  |
| P69936 YDFG_SALTY NADP-dependent<br>L-serine/L-allo-threonine dehydrogenase<br>ydfG | 3  |                                          | AAIEEMMASLPAQWR                                          | 58  | 15 | 7  | 29.2  | b11y4*y4y5y11*y11y15                    | 1703.83 | 91.182  | 11180  | 2 | 852.42  | 5.87   |
| P69936 YDFG_SALTY NADP-dependent<br>L-serine/L-allo-threonine dehydrogenase<br>ydfG | 4  | Carbamidomethyl+C(15)                    | MIVLVTGATAGFGECIAR                                       | 0   | 18 | 4  | 22.6  | y4y8°y8y10                              | 1865.94 | 101.081 | 3812   | 2 | 933.47  | -11.25 |
| P69936 YDFG_SALTY NADP-dependent<br>L-serine/L-allo-threonine dehydrogenase<br>ydfG | 5  |                                          | TYENTTALTPEдитеAVWWVATL<br>PAHVNINTVEMMPVTQSFAGLSV<br>HR | 199 | 48 | 5  | 25.54 | b11b13*b13b23b24                        | 5340.60 | 136.636 | 31332  | 4 | 1335.91 | -6.22  |
| P69936 YDFG_SALTY NADP-dependent<br>L-serine/L-allo-threonine dehydrogenase<br>ydfG | 6  |                                          | DELGENVLTAQLDVR                                          | 41  | 15 | 4  | 26.06 | b3°b3b4b9                               | 1671.84 | 33.008  | 18348  | 3 | 557.95  | -7.30  |
| P69936 YDFG_SALTY NADP-dependent<br>L-serine/L-allo-threonine dehydrogenase<br>ydfG | 7  | Carbamidomethyl+C(15)<br>;Oxidation+M(1) | MIVLVTGATAGFGECIAR                                       | 0   | 18 | 4  | 22.84 | b14°b14y10y11                           | 1881.96 | 120.880 | 13625  | 2 | 941.49  | 4.61   |
| O68883 CISY_SALTY Citrate synthase                                                  | 1  | Carbamidomethyl+C(12)                    | TAGSSGANPFACIAAGIASLWGPA<br>HGGANEAAALK                  | 240 | 34 | 7  | 12.95 | b2b7b18y2y7y9y34                        | 3195.57 | 117.071 | 22656  | 3 | 1065.86 | 0.46   |
| O68883 CISY_SALTY Citrate synthase                                                  | 2  | Carbamidomethyl+C(18)                    | NDLSYAGNFLNMMFSTPCETYEYV<br>NPVLER                       | 189 | 29 | 6  | 19.68 | b2b3b5b10y5y10                          | 3411.55 | 112.865 | 5382   | 3 | 1137.86 | 6.23   |
| O68883 CISY_SALTY Citrate synthase                                                  | 3  |                                          | AMGIPSSMFTVIFAMAR                                        | 371 | 17 | 7  | 47.81 | b3b4b5b13y5y13°y13                      | 1829.92 | 121.052 | 3333   | 2 | 915.46  | 2.13   |
| O68883 CISY_SALTY Citrate synthase                                                  | 4  |                                          | ILILHADHEQNASTSTVR                                       | 222 | 18 | 12 | 68.72 | b10y6y7y8°y8y9°y9y10°y1<br>0*y10y17°y17 | 2005.04 | 136.288 | 48014  | 2 | 1003.02 | -2.37  |
| O68883 CISY_SALTY Citrate synthase                                                  | 5  |                                          | HTMIHEQITRLFHAFR                                         | 110 | 16 | 6  | 51.5  | b4b5b9b11b13y6                          | 2037.05 | 72.026  | 20145  | 3 | 679.69  | -3.96  |
| O68883 CISY_SALTY Citrate synthase                                                  | 6  |                                          | LMGFGRHVYK                                               | 300 | 10 | 3  | 33.7  | b4b7b8                                  | 1207.63 | 77.669  | 6673   | 2 | 604.32  | -12.64 |
| O68883 CISY_SALTY Citrate synthase                                                  | 7  |                                          | AMDRILILHADHEQNASTSTVR                                   | 218 | 22 | 4  | 23.2  | y6y11°y11y12                            | 2478.24 | 109.097 | 5052   | 2 | 1239.62 | -4.83  |
| O68883 CISY_SALTY Citrate synthase                                                  | 8  |                                          | KLYPNVDIFYSGIILK                                         | 356 | 15 | 4  | 26.06 | b7b9°b9b11                              | 1769.96 | 67.608  | 3881   | 3 | 590.66  | -14.55 |
| P06179 FLIC_SALTY Flagellin                                                         | 1  |                                          | AQILQQAGTSVLAQANQVPQNVL<br>SLLR                          | 468 | 27 | 12 | 34.59 | b2*b2b3*b3b5b7b9y1y4y9<br>y13y27        | 2860.60 | 105.857 | 81419  | 3 | 954.21  | 0.17   |
| P06179 FLIC_SALTY Flagellin                                                         | 2  |                                          | FNSAITNLGNTVNNLTSAR                                      | 432 | 19 | 9  | 55.82 | b2y4y6y7y11y13y14*y14y<br>19            | 2007.03 | 78.596  | 46273  | 2 | 1004.02 | 2.92   |
| P06179 FLIC_SALTY Flagellin                                                         | 3  |                                          | SQSALGTAIER                                              | 20  | 11 | 5  | 31.1  | b2y6y8y9y11                             | 1132.59 | 41.869  | 42239  | 2 | 566.80  | -5.17  |
| P06179 FLIC_SALTY Flagellin                                                         | 4  |                                          | INSAKDDAAGQAIANR                                         | 37  | 16 | 5  | 48.06 | y3y4y5y6y16                             | 1614.80 | 30.442  | 42229  | 3 | 538.94  | -11.64 |

|                                                                     |    |                       |                                 |     |    |    |       |                                |         |         |       |   |         |        |
|---------------------------------------------------------------------|----|-----------------------|---------------------------------|-----|----|----|-------|--------------------------------|---------|---------|-------|---|---------|--------|
| P06179 FLIC_SALTY Flagellin                                         | 5  |                       | VSGQTQFNGVK                     | 125 | 11 | 7  | 36.46 | b2b4y5y9y10*y10y11             | 1164.60 | 33.043  | 40663 | 2 | 582.80  | -3.46  |
| P06179 FLIC_SALTY Flagellin                                         | 6  |                       | AQVINTNSLSLLTQNNLNK             | 1   | 19 | 8  | 21.76 | b1b2*b2y2y7y15y17y19           | 2085.14 | 74.502  | 38558 | 2 | 1043.07 | 2.69   |
| P06179 FLIC_SALTY Flagellin                                         | 7  |                       | VSDTAATVTGYADTTIALDNSTF<br>K    | 180 | 24 | 9  | 50.3  | b1y6y7°y7y8y9*y9y13y24         | 2462.19 | 92.053  | 35241 | 3 | 821.40  | 0.59   |
| P06179 FLIC_SALTY Flagellin                                         | 8  |                       | IDAALAQVDTLR                    | 411 | 12 | 6  | 50.8  | b4b5y4y7y10y12                 | 1285.71 | 60.942  | 28865 | 2 | 643.36  | -3.23  |
| P06179 FLIC_SALTY Flagellin                                         | 9  |                       | ELAVQSANSTNSQSDLDLSIQAEIT<br>QR | 93  | 26 | 4  | 12.06 | b9y3*y3y6                      | 2805.36 | 70.091  | 2920  | 2 | 1403.18 | 3.31   |
| P06179 FLIC_SALTY Flagellin                                         | 10 |                       | FTANIK                          | 53  | 6  | 1  | 13.55 | y5                             | 693.38  | 34.202  | 10271 | 2 | 347.20  | -14.00 |
| P06179 FLIC_SALTY Flagellin                                         | 11 |                       | TYAASK                          | 379 | 6  | 1  | 13.55 | b5                             | 640.33  | 85.323  | 4832  | 1 | 640.33  | -5.43  |
| P06179 FLIC_SALTY Flagellin                                         | 12 |                       | AQPDLAEEAAATTTENPLQK            | 392 | 19 | 3  | 14.8  | b8b12y9                        | 1968.99 | 60.039  | 4779  | 2 | 985.00  | 3.60   |
| P06179 FLIC_SALTY Flagellin                                         | 13 |                       | YTADDGTSKTALNK                  | 349 | 14 | 4  | 19.11 | b3b12y11*y11                   | 1484.73 | 77.740  | 13232 | 2 | 742.87  | 4.03   |
| Q7CPL7 RL17_SALTY 50S ribosomal<br>protein L17                      | 1  |                       | LFNELGPR                        | 78  | 8  | 8  | 66.94 | y3y4y5y6*y6y7*y7y8             | 945.51  | 55.354  | 96999 | 2 | 473.26  | -8.20  |
| Q7CPL7 RL17_SALTY 50S ribosomal<br>protein L17                      | 2  |                       | AGDNAPMAYIELVDR                 | 103 | 15 | 10 | 53.21 | b4*b4b5y4y5y7°y7y10y13<br>*y15 | 1634.79 | 79.183  | 46283 | 2 | 817.90  | 4.41   |
| Q7CPL7 RL17_SALTY 50S ribosomal<br>protein L17                      | 3  |                       | NMAGSLVR                        | 22  | 8  | 4  | 32.88 | b3y6y7y8                       | 847.44  | 41.225  | 43777 | 2 | 424.22  | -6.19  |
| Q7CPL7 RL17_SALTY 50S ribosomal<br>protein L17                      | 4  |                       | AGGYTR                          | 90  | 6  | 2  | 26.69 | b3b4                           | 624.32  | 30.184  | 3749  | 1 | 624.32  | 12.22  |
| Q7CPL7 RL17_SALTY 50S ribosomal<br>protein L17                      | 5  |                       | FASRAGGYTR                      | 86  | 10 | 3  | 33.7  | b3b4b7                         | 1085.55 | 26.474  | 4190  | 3 | 362.52  | 5.17   |
| P35891 DNAA_SALTY Chromosomal<br>replication initiator protein dnaA | 1  | Carbamidomethyl+C(9)  | MSLSLWQQCLAR                    | 0   | 12 | 9  | 59.17 | b7b11°b11*b11b12y4y5y6<br>y11  | 1492.72 | 76.395  | 10140 | 2 | 746.86  | -11.94 |
| P35891 DNAA_SALTY Chromosomal<br>replication initiator protein dnaA | 2  | Carbamidomethyl+C(13) | YLNNINGLLNTFCGADAPQLR           | 54  | 21 | 3  | 20.4  | b4b7b13                        | 2364.18 | 91.218  | 2356  | 2 | 1182.60 | 2.89   |
| P35891 DNAA_SALTY Chromosomal<br>replication initiator protein dnaA | 3  |                       | SNVNVK                          | 128 | 6  | 1  | 13.55 | b4                             | 660.36  | 34.104  | 6265  | 1 | 660.36  | -6.19  |
| P35891 DNAA_SALTY Chromosomal<br>replication initiator protein dnaA | 4  |                       | HTFDNFVEGK                      | 134 | 10 | 4  | 39.85 | b3b7b8y3                       | 1193.54 | 45.074  | 3995  | 2 | 597.27  | -15.03 |
| P35891 DNAA_SALTY Chromosomal<br>replication initiator protein dnaA | 5  |                       | SGWDNVPAPAEPTYR                 | 113 | 15 | 3  | 17.98 | b10y4y10                       | 1659.80 | 64.877  | 3829  | 2 | 830.41  | 17.36  |
| P35891 DNAA_SALTY Chromosomal<br>replication initiator protein dnaA | 6  |                       | QMAMALAKELTNHSLPEIGDAFG<br>GR   | 406 | 25 | 7  | 32.03 | b12b14b16°b16y14y15*y1<br>5    | 2657.32 | 136.713 | 4996  | 2 | 1329.16 | 0.64   |
| P53636 SODC1_SALTY Superoxide<br>dismutase [Cu-Zn] 1                | 1  | Carbamidomethyl+C(3)  | FACGVIEK                        | 169 | 8  | 9  | 66.94 | y1y2°y2y3y4y5y6y7y8            | 923.46  | 41.276  | 95319 | 2 | 462.23  | -7.87  |
| P53636 SODC1_SALTY Superoxide<br>dismutase [Cu-Zn] 1                | 2  |                       | GGDNYSDKPAPLGGGGGAR             | 151 | 18 | 8  | 66.71 | b2y5y6y7y8y11y12y18            | 1688.78 | 33.228  | 70795 | 3 | 563.60  | -10.84 |
| P53636 SODC1_SALTY Superoxide<br>dismutase [Cu-Zn] 1                | 3  |                       | EVPALMAGGHLDPEK                 | 84  | 15 | 7  | 29.2  | b3b7b9y2y4°y4y15               | 1563.80 | 63.000  | 5701  | 2 | 782.41  | 13.27  |
| P53636 SODC1_SALTY Superoxide<br>dismutase [Cu-Zn] 1                | 4  |                       | DGKEVPALMAGGHLDPEK              | 81  | 18 | 5  | 21.52 | b5b12y7y11°y11                 | 1863.95 | 61.109  | 2573  | 3 | 621.99  | 11.26  |
| P53636 SODC1_SALTY Superoxide<br>dismutase [Cu-Zn] 1                | 5  |                       | DGKEVPALMAGGHLDPEK              | 81  | 18 | 4  | 41.38 | b4b5b12b13                     | 1863.91 | 67.645  | 15571 | 2 | 932.46  | -6.88  |
| P53636 SODC1_SALTY Superoxide<br>dismutase [Cu-Zn] 1                | 6  | Carbamidomethyl+C(21) | GGDNYSDKPAPLGGGGGARFACG<br>VIEK | 151 | 26 | 3  | 12.06 | b16y6y12                       | 2593.25 | 102.270 | 1500  | 3 | 865.09  | 1.04   |
| P53636 SODC1_SALTY Superoxide<br>dismutase [Cu-Zn] 1                | 7  | Oxidation+M(9)        | DGKEVPALMAGGHLDPEK              | 81  | 18 | 4  | 21.52 | b9b14y4y7                      | 1879.95 | 73.245  | 74578 | 3 | 627.32  | 12.40  |
| O54296 RS11_SALTY 30S ribosomal<br>protein S11                      | 1  |                       | ALNAAGFR                        | 98  | 8  | 4  | 40.66 | y4y5y6y8                       | 819.44  | 42.120  | 29918 | 2 | 410.22  | -6.78  |
| O54296 RS11_SALTY 30S ribosomal<br>protein S11                      | 2  |                       | QGNALGWATAGGSGFR                | 37  | 16 | 5  | 34.84 | y5y10y11y14y16                 | 1549.76 | 65.990  | 20428 | 2 | 775.38  | 6.93   |

|                                                             |    |                       |                                       |     |    |    |       |                                           |         |         |       |   |         |        |
|-------------------------------------------------------------|----|-----------------------|---------------------------------------|-----|----|----|-------|-------------------------------------------|---------|---------|-------|---|---------|--------|
| O54296 RS11_SALTY 30S ribosomal protein S11                 | 3  |                       | STPFAAQVAAER                          | 57  | 12 | 5  | 29.29 | b1y2y7y8y10                               | 1247.64 | 49.419  | 14072 | 2 | 624.33  | 5.67   |
| O54296 RS11_SALTY 30S ribosomal protein S11                 | 4  | Carbamidomethyl+C(15) | ITNITDVTPIPHNGCRPPK                   | 106 | 19 | 6  | 23.44 | b3*b3b8b13y8*y8                           | 2130.08 | 78.505  | 26339 | 3 | 710.70  | -15.13 |
| O54296 RS11_SALTY 30S ribosomal protein S11                 | 5  |                       | QVSDGVAHIHASFNNTIVTITDR               | 14  | 23 | 4  | 12.94 | b4*b4b9y20                                | 2495.26 | 89.204  | 16821 | 3 | 832.42  | -3.33  |
| O54296 RS11_SALTY 30S ribosomal protein S11                 | 6  | Carbamidomethyl+C(13) | STPFAAQVAAERCADAVK                    | 57  | 18 | 4  | 22.84 | b8y4*y4y5                                 | 1891.95 | 59.145  | 3942  | 2 | 946.48  | 7.48   |
| P0A2F4 SODF_SALTY Superoxide dismutase [Fe]                 | 1  |                       | SFELPALPYAK                           | 1   | 11 | 9  | 35.03 | b2b3*b3b9y1y2y4y7y11                      | 1235.66 | 79.239  | 42812 | 2 | 618.34  | -2.27  |
| P0A2F4 SODF_SALTY Superoxide dismutase [Fe]                 | 2  | Carbamidomethyl+C(22) | TSEGGIFNNAQVWNHTFYWNCL<br>APNAGGEPTGK | 58  | 34 | 12 | 50.21 | b1b2b3b11b14b15b16y7y9<br>y10*y10y34      | 3708.70 | 97.058  | 20923 | 3 | 1236.90 | 0.72   |
| P0A2F4 SODF_SALTY Superoxide dismutase [Fe]                 | 3  |                       | DALAPHISAETLEYHYGK                    | 12  | 18 | 6  | 34.35 | b3y6y7y11y13*y13                          | 2015.00 | 107.101 | 40822 | 3 | 672.34  | 4.60   |
| P0A2F4 SODF_SALTY Superoxide dismutase [Fe]                 | 4  | Phosphoryl STY(7)     | HHQTYVTNLNLIK                         | 30  | 14 | 4  | 27.32 | b6b12_HPO3 b12y8y10                       | 1774.85 | 77.418  | 3153  | 3 | 592.29  | -4.95  |
| P77983 KPYK1_SALTY Pyruvate kinase I                        | 1  |                       | GDLGVEIPVEEVIFAQK                     | 244 | 17 | 9  | 32.45 | b5*b5b7*b7y1y4*y4y10y12                   | 1842.99 | 95.013  | 28055 | 2 | 922.00  | 2.72   |
| P77983 KPYK1_SALTY Pyruvate kinase I                        | 2  |                       | MLDAGMNVMR                            | 22  | 10 | 4  | 36.71 | y7y8y9y10                                 | 1137.54 | 57.399  | 16106 | 2 | 569.27  | 12.66  |
| P77983 KPYK1_SALTY Pyruvate kinase I                        | 3  | Carbamidomethyl+C(3)  | IVCTIGPK                              | 5   | 8  | 3  | 35.89 | b5y3y6                                    | 887.49  | 35.957  | 9739  | 2 | 444.25  | -12.79 |
| P77983 KPYK1_SALTY Pyruvate kinase I                        | 4  |                       | IENQEGLNNFDEILEASDGIMVAR              | 220 | 24 | 3  | 12.61 | b4b7y7                                    | 2677.26 | 112.928 | 7740  | 3 | 893.09  | -4.65  |
| P77983 KPYK1_SALTY Pyruvate kinase I                        | 5  |                       | AGQTFTFTTDDK                          | 86  | 11 | 3  | 31.1  | y6y7y9                                    | 1216.60 | 75.375  | 1848  | 2 | 608.80  | 9.33   |
| P77983 KPYK1_SALTY Pyruvate kinase I                        | 6  |                       | AEAGDVANAILDGTDAVMLSGES<br>AK         | 292 | 25 | 3  | 22.8  | y5y13y14                                  | 2405.14 | 95.562  | 27087 | 2 | 1203.07 | -4.36  |
| P77983 KPYK1_SALTY Pyruvate kinase I                        | 7  | Carbamidomethyl+C(6)  | ITEAVCR                               | 353 | 7  | 4  | 37.24 | b4*b4y5y6                                 | 848.42  | 24.857  | 10372 | 2 | 424.71  | -8.99  |
| P77983 KPYK1_SALTY Pyruvate kinase I                        | 8  | Carbamidomethyl+C(13) | YPLEAVSIMATICER                       | 319 | 15 | 3  | 17.98 | b10y4y13                                  | 1752.86 | 79.413  | 8783  | 2 | 876.94  | -1.60  |
| P77983 KPYK1_SALTY Pyruvate kinase I                        | 9  | Carbamidomethyl+C(7)  | QDLIFGCEQGVDFAASFIR                   | 175 | 20 | 4  | 14.24 | b5*b5y9y14                                | 2272.10 | 112.693 | 3825  | 3 | 758.04  | -2.47  |
| P77983 KPYK1_SALTY Pyruvate kinase I                        | 10 | Carbamidomethyl+C(9)  | DKQDLIFGCEQGVDFAASFIR                 | 173 | 22 | 4  | 13.32 | b7*b7b9y13                                | 2515.26 | 74.319  | 5201  | 3 | 839.09  | 10.58  |
| P77983 KPYK1_SALTY Pyruvate kinase I                        | 11 | Carbamidomethyl+C(6)  | ITEAVCRGAVETAEK                       | 353 | 15 | 8  | 36.78 | b6b7*b7b10*b10y5y7*y7                     | 1633.80 | 136.194 | 1625  | 2 | 817.41  | -10.39 |
| P77983 KPYK1_SALTY Pyruvate kinase I                        | 12 | Phosphoryl STY(12)    | YFPDATILALTNEVTAR                     | 389 | 18 | 4  | 26.36 | b7y5y6y11                                 | 2075.97 | 54.876  | 2447  | 4 | 519.75  | -11.41 |
| Q7CPL5 RL14_SALTY 50S ribosomal protein L14                 | 1  |                       | IFGPVTR                               | 98  | 7  | 4  | 40.25 | y3*y3y5y6                                 | 789.45  | 45.120  | 56129 | 2 | 395.23  | -14.38 |
| Q7CPL5 RL14_SALTY 50S ribosomal protein L14                 | 2  |                       | MIQEQTMLNVADNSGAR                     | 0   | 17 | 14 | 83.25 | b2b3b9y1y5*y5y6y7y9*y9<br>y11y12y14y17    | 1877.89 | 58.792  | 50477 | 2 | 939.45  | 2.41   |
| Q7CPL5 RL14_SALTY 50S ribosomal protein L14                 | 3  | Carbamidomethyl+C(6)  | FDGNACVILNNSEQPIGTR                   | 78  | 20 | 5  | 30.54 | y3y4y7y12y20                              | 2219.07 | 59.003  | 6980  | 2 | 1110.04 | 7.59   |
| Q7CPL5 RL14_SALTY 50S ribosomal protein L14                 | 4  |                       | IQEQTMLNVADNSGAR                      | 1   | 16 | 12 | 68.95 | b3b6b12y8y10*y10*y10y1<br>1*y11y13y15*y15 | 1746.86 | 94.953  | 6960  | 2 | 873.94  | 10.76  |
| Q7CPL5 RL14_SALTY 50S ribosomal protein L14                 | 5  | Carbamidomethyl+C(14) | RPDGSVIRFDGNACVILNNSEQPI<br>GTR       | 70  | 28 | 5  | 38.31 | b3b14y10y11y12                            | 3099.57 | 121.206 | 2545  | 3 | 1033.86 | 11.11  |
| Q7CPL5 RL14_SALTY 50S ribosomal protein L14                 | 6  | Phosphoryl STY(6)     | IFGPVTRELR                            | 98  | 10 | 4  | 33.7  | y3y6y7*y7                                 | 1267.64 | 114.646 | 2000  | 2 | 634.32  | -7.99  |
| Q7CPL5 RL14_SALTY 50S ribosomal protein L14                 | 7  | Oxidation+M(7)        | MIQEQTMLNVADNSGAR                     | 0   | 17 | 6  | 50.74 | b4b5b6b9b12y3                             | 1893.89 | 95.963  | 6630  | 2 | 947.45  | 4.45   |
| P67912 HLDD_SALTY ADP-L-glycero-D-manno-heptose-6-epimerase | 1  |                       | EIPFLYASSAATYGGR                      | 107 | 16 | 8  | 68.91 | b10b13*b13b14y6y7y8y9                     | 1702.84 | 73.033  | 28054 | 2 | 851.92  | -4.30  |

|                                                              |    |                       |                                          |     |    |    |       |                               |         |         |       |   |         |        |
|--------------------------------------------------------------|----|-----------------------|------------------------------------------|-----|----|----|-------|-------------------------------|---------|---------|-------|---|---------|--------|
| [P67912]HLDD_SALTY ADP-L-glycero-D-manno-heptose-6-epimerase | 2  |                       | QILPEANSQIVGFR                           | 152 | 14 | 3  | 26.89 | b3b8b9                        | 1571.84 | 64.364  | 8835  | 2 | 786.42  | -11.88 |
| [P67912]HLDD_SALTY ADP-L-glycero-D-manno-heptose-6-epimerase | 3  |                       | YQAFTQADLTNLR                            | 271 | 13 | 5  | 20.46 | b2b12y2y6y10                  | 1540.78 | 65.238  | 8631  | 2 | 770.90  | 6.02   |
| [P67912]HLDD_SALTY ADP-L-glycero-D-manno-heptose-6-epimerase | 4  |                       | SGIFNLGTGR                               | 229 | 10 | 4  | 26.71 | b6b10y3y7                     | 1021.53 | 57.634  | 4804  | 2 | 511.27  | -12.37 |
| [P67912]HLDD_SALTY ADP-L-glycero-D-manno-heptose-6-epimerase | 5  |                       | TVAEGVTEYMAWLN RDA                       | 293 | 17 | 5  | 22.7  | b9b14*b14y9y11                | 1925.91 | 98.764  | 2641  | 2 | 963.46  | 4.12   |
| [P67912]HLDD_SALTY ADP-L-glycero-D-manno-heptose-6-epimerase | 6  | Carbamidomethyl+C(6)  | ELLHYCLEREIPFLYASSAATYGG<br>R            | 98  | 25 | 5  | 27.7  | b2y5y6y11y13                  | 2916.46 | 110.429 | 2263  | 3 | 972.82  | 8.29   |
| [P67912]HLDD_SALTY ADP-L-glycero-D-manno-heptose-6-epimerase | 7  |                       | GSIEYIPFPDK                              | 256 | 11 | 4  | 35.03 | b7b9y4y8                      | 1265.63 | 53.185  | 8067  | 2 | 633.32  | -6.56  |
| [P67912]HLDD_SALTY ADP-L-glycero-D-manno-heptose-6-epimerase | 8  |                       | GSMASVAFHLNTQLNNGESPK                    | 178 | 21 | 6  | 29.48 | b9b10b14°b14y10y20            | 2202.02 | 74.805  | 3881  | 2 | 1101.51 | -19.62 |
| [P67912]HLDD_SALTY ADP-L-glycero-D-manno-heptose-6-epimerase | 9  |                       | FVNLVDLNIADYMDK                          | 38  | 15 | 3  | 17.98 | b4b6y10                       | 1769.89 | 79.940  | 3760  | 3 | 590.63  | 6.90   |
| [P67912]HLDD_SALTY ADP-L-glycero-D-manno-heptose-6-epimerase | 10 |                       | DFVYVGDVAAVNLWFLESGK                     | 209 | 20 | 10 | 65.81 | b8b9°b9b10°b10y4y6y7°y7<br>y8 | 2229.16 | 136.316 | 3333  | 2 | 1115.08 | 16.43  |
| [P67912]HLDD_SALTY ADP-L-glycero-D-manno-heptose-6-epimerase | 11 | Carbamidomethyl+C(6)  | ELLHYCLER                                | 98  | 9  | 6  | 61.33 | b3b4b5°b5b6y7                 | 1232.59 | 136.341 | 3328  | 1 | 1232.59 | -14.06 |
| [P67912]HLDD_SALTY ADP-L-glycero-D-manno-heptose-6-epimerase | 12 |                       | TVAEGVTEYMAWLN R                         | 293 | 15 | 5  | 42.8  | b5b7b11y8y9                   | 1739.85 | 91.298  | 2245  | 2 | 870.43  | 7.23   |
| [P67912]HLDD_SALTY ADP-L-glycero-D-manno-heptose-6-epimerase | 13 |                       | TVAEGVTEYMAWLN RDA                       | 293 | 17 | 4  | 16.17 | b8b10y6*y6                    | 1925.91 | 66.210  | 3223  | 2 | 963.46  | 1.46   |
| [P67912]HLDD_SALTY ADP-L-glycero-D-manno-heptose-6-epimerase | 14 | Oxidation+M(3)        | GSMASVAFHLNTQLNNGESPK                    | 178 | 21 | 7  | 34.21 | b8b11b13y10°y10y12y17         | 2218.09 | 127.064 | 2034  | 2 | 1109.55 | 14.75  |
| [P67912]HLDD_SALTY ADP-L-glycero-D-manno-heptose-6-epimerase | 15 |                       | EIPFLYASSAATYGG R                        | 107 | 16 | 1  | 7.25  | b7                            | 1684.84 | 72.958  | 4141  | 2 | 842.92  | 5.80   |
| [P14845]CARA_SALTY Carbamoyl-phohate synthase small chain    | 1  | Carbamidomethyl+C(12) | FLETDIPLFGICLGHQLLALASGAK                | 257 | 25 | 7  | 26.75 | b3b5b6y2y3y19y25              | 2684.45 | 129.709 | 46939 | 3 | 895.49  | 1.18   |
| [P14845]CARA_SALTY Carbamoyl-phohate synthase small chain    | 2  |                       | AFPGLNGMDLAK                             | 148 | 12 | 7  | 43.81 | b6b11b12y6y9y10y12            | 1233.62 | 71.967  | 16539 | 2 | 617.32  | -3.96  |
| [P14845]CARA_SALTY Carbamoyl-phohate synthase small chain    | 3  |                       | EVTTAETYR                                | 160 | 9  | 5  | 54.21 | y4y5y6y7y9                    | 1069.51 | 28.238  | 9441  | 2 | 535.26  | -9.02  |
| [P14845]CARA_SALTY Carbamoyl-phohate synthase small chain    | 4  |                       | SALLVLEDGTQFHGR                          | 3   | 15 | 6  | 24    | b1b3°b3y2y10y11               | 1642.84 | 67.838  | 9370  | 3 | 548.28  | -11.67 |
| [P14845]CARA_SALTY Carbamoyl-phohate synthase small chain    | 5  |                       | NVVMITAQNHGFAVDEDSL PANL<br>R            | 302 | 24 | 5  | 12.61 | b1b11y2y10y15                 | 2611.31 | 82.870  | 7317  | 3 | 871.11  | 4.58   |
| [P14845]CARA_SALTY Carbamoyl-phohate synthase small chain    | 6  | Carbamidomethyl+C(6)  | GAQNGCIIAGDSPDAK                         | 125 | 16 | 6  | 46.23 | b9b10b13y9y10y12              | 1573.73 | 37.810  | 5806  | 2 | 787.37  | 2.40   |
| [P14845]CARA_SALTY Carbamoyl-phohate synthase small chain    | 7  | Carbamidomethyl+C(18) | MNPDGIFLSNGPGDPAPCDYAITA<br>IQK          | 230 | 27 | 3  | 17.91 | y11y13y20                     | 2862.36 | 82.913  | 6139  | 2 | 1431.68 | 5.97   |
| [P14845]CARA_SALTY Carbamoyl-phohate synthase small chain    | 8  |                       | AIGATGSAGVEVVFN TSM TGYQE I<br>LTDPSSYSR | 18  | 32 | 5  | 11.1  | b15y9°y9y11°y11               | 3321.63 | 103.478 | 5428  | 5 | 665.13  | 10.80  |



|                                                           |    |                      |                                |     |    |    |       |                                    |         |         |        |   |         |        |
|-----------------------------------------------------------|----|----------------------|--------------------------------|-----|----|----|-------|------------------------------------|---------|---------|--------|---|---------|--------|
| [P14845]CARA_SALTY Carbamoyl-phohate synthase small chain | 9  |                      | AFPGLNGMDLAKEVTTAETYR          | 148 | 21 | 5  | 18.72 | b4b7*b7y3y7                        | 2284.14 | 110.358 | 8156   | 3 | 762.05  | 5.02   |
| [P14845]CARA_SALTY Carbamoyl-phohate synthase small chain | 10 | Carbamidomethyl+C(7) | MLVDRGCR                       | 207 | 8  | 4  | 53.8  | b4b6y3y7                           | 1006.48 | 67.962  | 3337   | 1 | 1006.48 | -8.55  |
| [P14845]CARA_SALTY Carbamoyl-phohate synthase small chain | 11 | Oxidation+M(8)       | AFPGLNGMDLAKEVTTAETYR          | 148 | 21 | 4  | 13.75 | b12b17y11°y11                      | 2300.13 | 88.719  | 28962  | 3 | 767.38  | 2.65   |
| [P0A2E1]GLYA_SALTY Serine hydroxymethyltransferase        | 1  |                      | LNSAVFPSAQGGPLMHVIAGK          | 251 | 21 | 9  | 37.22 | b4°b4b14b16b21y3y4y15y21           | 2094.10 | 78.609  | 88354  | 3 | 698.71  | -5.71  |
| [P0A2E1]GLYA_SALTY Serine hydroxymethyltransferase        | 2  |                      | VMQAQGSQLTNK                   | 42  | 12 | 10 | 59.17 | b2b3b9y2y3y7y9y10*y10y12           | 1304.67 | 29.590  | 56673  | 2 | 652.84  | 2.15   |
| [P0A2E1]GLYA_SALTY Serine hydroxymethyltransferase        | 3  |                      | SPFVTSGIR                      | 354 | 9  | 10 | 90.62 | b3°b3b7b8y1y4y5y6y7y9              | 963.52  | 49.271  | 48988  | 2 | 482.27  | -1.96  |
| [P0A2E1]GLYA_SALTY Serine hydroxymethyltransferase        | 4  | Carbamidomethyl+C(5) | VLDICAR                        | 405 | 7  | 5  | 40.25 | b2y4y5y6y7                         | 846.44  | 44.700  | 44255  | 2 | 423.72  | -11.61 |
| [P0A2E1]GLYA_SALTY Serine hydroxymethyltransferase        | 5  |                      | VYQQQVAK                       | 285 | 8  | 7  | 56.81 | b2b3y3y5*y5y7y8                    | 963.51  | 19.660  | 24637  | 2 | 482.26  | -14.13 |
| [P0A2E1]GLYA_SALTY Serine hydroxymethyltransferase        | 6  |                      | AMVEVFLNR                      | 296 | 9  | 5  | 38.06 | b4b7°b7b8°b8                       | 1078.59 | 85.398  | 18271  | 2 | 539.80  | 14.03  |
| [P0A2E1]GLYA_SALTY Serine hydroxymethyltransferase        | 7  |                      | MIIGFSAYSQGVVDWAK              | 168 | 17 | 3  | 16.17 | b8b11y4                            | 1800.94 | 74.053  | 16178  | 3 | 600.98  | 20.33  |
| [P0A2E1]GLYA_SALTY Serine hydroxymethyltransferase        | 8  |                      | EAMEPEFK                       | 277 | 8  | 3  | 40.66 | y4y5y6                             | 980.44  | 43.406  | 13610  | 2 | 490.72  | 1.37   |
| [P0A2E1]GLYA_SALTY Serine hydroxymethyltransferase        | 9  |                      | LYNIVPYGIDESGKIDYDEMAK         | 138 | 22 | 3  | 22.07 | b3y17y18                           | 2533.24 | 76.669  | 95489  | 3 | 845.08  | 9.25   |
| [P0A2E1]GLYA_SALTY Serine hydroxymethyltransferase        | 10 |                      | EMNIADYDAELWQAMEQEKVR          | 4   | 21 | 3  | 13.75 | b5y17y19                           | 2569.14 | 74.500  | 45489  | 3 | 857.05  | -10.26 |
| [P0A2E1]GLYA_SALTY Serine hydroxymethyltransferase        | 11 |                      | QEEHIELIASENYTSPRVMAQGSQLTNK   | 25  | 29 | 6  | 22.65 | b10*b10b11°b11b13*b13              | 3301.65 | 84.226  | 5550   | 3 | 1101.22 | 11.17  |
| [P0A1R8]DBHB_SALTY DNA-binding protein HU-beta            | 1  |                      | IAAGADISK                      | 9   | 9  | 15 | 87.61 | b2b6°b6y1y2°y2y3y4y5y6°y6y7°y7y8y9 | 845.46  | 28.162  | 348099 | 2 | 423.23  | -14.22 |
| [P0A1R8]DBHB_SALTY DNA-binding protein HU-beta            | 2  |                      | ALKDAVN                        | 83  | 7  | 6  | 37.24 | b1b2b5b6y5y7                       | 730.41  | 22.657  | 4115   | 1 | 730.41  | 2.01   |
| [P0A1R8]DBHB_SALTY DNA-binding protein HU-beta            | 3  |                      | EITIAAAK                       | 67  | 8  | 7  | 80.08 | b3°b3b7y3y4y5y6                    | 816.46  | 38.330  | 64133  | 2 | 408.74  | -21.60 |
| [P0A1R8]DBHB_SALTY DNA-binding protein HU-beta            | 4  |                      | SQLEIK                         | 3   | 6  | 3  | 39.83 | b3y3y4                             | 717.41  | 25.913  | 37563  | 2 | 359.21  | -12.68 |
| [P0A1R8]DBHB_SALTY DNA-binding protein HU-beta            | 5  |                      | ALDAIIASVTESLKEGDDVALVGFGTFAVK | 23  | 30 | 8  | 50.02 | b3b4b5°b5y4y6y8y23                 | 3036.62 | 136.294 | 25700  | 3 | 1012.88 | 2.25   |
| [P0A1R8]DBHB_SALTY DNA-binding protein HU-beta            | 6  |                      | EGDDVALVGFGTFAVKER             | 37  | 18 | 3  | 24.36 | b10b12b13                          | 1909.95 | 117.825 | 5930   | 2 | 955.48  | -9.78  |
| [P0A1R8]DBHB_SALTY DNA-binding protein HU-beta            | 7  |                      | AGADISK                        | 11  | 7  | 3  | 38.06 | b3b4b5                             | 661.35  | 28.162  | 57132  | 1 | 661.35  | 3.05   |
| [P0A1R8]DBHB_SALTY DNA-binding protein HU-beta            | 8  |                      | AAGADISK                       | 10  | 8  | 4  | 38.06 | b3b4b5°b5                          | 732.39  | 28.159  | 22019  | 1 | 732.39  | 1.67   |
| [P58661]AAT_SALTY Aartate aminotransferase                | 1  |                      | MFENITAAPADPILGLADLFR          | 0   | 21 | 9  | 44.42 | b2b4b6b13y3y5y7y13y21              | 2275.19 | 121.449 | 13050  | 2 | 1138.10 | 5.58   |
| [P58661]AAT_SALTY Aartate aminotransferase                | 2  |                      | TAQTPGGTGALR                   | 96  | 12 | 5  | 33.98 | b4*b4y3y7y8                        | 1129.60 | 29.376  | 11501  | 2 | 565.30  | 2.70   |
| [P58661]AAT_SALTY Aartate aminotransferase                | 3  | Carbamidomethyl+C(4) | VGACTLVAADAETVDR               | 254 | 16 | 4  | 25.38 | b3b11°b11b12                       | 1647.80 | 54.409  | 5346   | 2 | 824.41  | 2.30   |
| [P58661]AAT_SALTY Aartate aminotransferase                | 4  |                      | GWLPLFD FayQGFAR               | 204 | 15 | 3  | 17.98 | b11b13y12                          | 1787.88 | 117.374 | 5146   | 2 | 894.44  | -4.98  |
| [P58661]AAT_SALTY Aartate aminotransferase                | 5  |                      | ANYSNPPAHGASIVATILSNDALR       | 280 | 24 | 6  | 25.98 | b8°b8b14y6*y6y7                    | 2452.28 | 98.298  | 16283  | 3 | 818.10  | 9.96   |
| [P58661]AAT_SALTY Aartate aminotransferase                | 6  |                      | AIWEQELTDMR                    | 304 | 11 | 3  | 35.87 | b4b5b6                             | 1391.68 | 70.588  | 3597   | 2 | 696.34  | 9.12   |
| [P58661]AAT_SALTY Aartate aminotransferase                | 7  |                      | QLFVNTLQEK                     | 322 | 10 | 6  | 39.85 | b3y3°y3y6*y6y7                     | 1219.67 | 59.162  | 2612   | 2 | 610.34  | 4.50   |

|                                                              |    |                       |                                |     |    |    |       |                              |         |         |       |   |         |        |
|--------------------------------------------------------------|----|-----------------------|--------------------------------|-----|----|----|-------|------------------------------|---------|---------|-------|---|---------|--------|
| P58661 AAT_SALTY Aartate aminotransferase                    | 8  | Carbamidomethyl+C(4)  | VGACTLVAADAETVDRAFSQMK         | 254 | 22 | 3  | 22.07 | b9b10y7                      | 2340.15 | 72.958  | 7832  | 2 | 1170.58 | 7.30   |
| P58661 AAT_SALTY Aartate aminotransferase                    | 9  |                       | LREEFGVYAVASGR                 | 360 | 14 | 4  | 19.11 | b6°b6b8y10                   | 1553.80 | 96.983  | 5571  | 2 | 777.40  | -4.16  |
| P58661 AAT_SALTY Aartate aminotransferase                    | 10 |                       | AIWEQELTDMRQR                  | 304 | 13 | 5  | 29.7  | y6°y6y9y12*y12               | 1675.81 | 84.962  | 3623  | 3 | 559.27  | -9.47  |
| P58661 AAT_SALTY Aartate aminotransferase                    | 11 |                       | GWLPLFD FayQG                  | 204 | 12 | 1  | 7.26  | y10                          | 1413.68 | 117.288 | 2183  | 2 | 707.35  | 0.09   |
| Q8ZRE7 YAIE_SALTY UPF0345 protein yaiE                       | 1  |                       | MLQSNEYFSGK                    | 0   | 11 | 4  | 24.11 | b10y4y10y11                  | 1303.60 | 49.267  | 31378 | 2 | 652.30  | 0.00   |
| Q8ZRE7 YAIE_SALTY UPF0345 protein yaiE                       | 2  |                       | VLLPGTVEWK                     | 53  | 10 | 4  | 33.7  | y5y7y8y10                    | 1141.65 | 70.960  | 30476 | 2 | 571.33  | -7.16  |
| Q8ZRE7 YAIE_SALTY UPF0345 protein yaiE                       | 3  | Carbamidomethyl+C(28) | VYTAGEVFNVPGHSEFHLQVAEP ASYLCR | 63  | 29 | 3  | 11.47 | b7b14y7                      | 3277.61 | 104.291 | 6033  | 3 | 1093.21 | 11.32  |
| Q8ZRE7 YAIE_SALTY UPF0345 protein yaiE                       | 4  |                       | LQSNEYFSGK                     | 1   | 10 | 3  | 26.71 | b4y3y9                       | 1172.56 | 97.034  | 1691  | 1 | 1172.56 | -1.67  |
| P23905 DGAL_SALTY D-galactose-binding periplasmic protein    | 1  |                       | SSIPVFGVDALPEALALVK            | 250 | 19 | 9  | 47.38 | b4°b4b8b9b14y4y14y16y19      | 1926.10 | 108.347 | 46864 | 2 | 963.55  | 3.68   |
| P23905 DGAL_SALTY D-galactose-binding periplasmic protein    | 2  |                       | SGAMAGTVLNDANNQAK              | 269 | 17 | 10 | 42.37 | b3b9°b9y4y9y10y12*y12y17*y17 | 1661.80 | 45.937  | 38262 | 2 | 831.40  | 4.92   |
| P23905 DGAL_SALTY D-galactose-binding periplasmic protein    | 3  |                       | ALAINLVDPAAGTVIEK              | 84  | 18 | 8  | 24.6  | b3y1y2°y2y7y11y14y18         | 1766.01 | 80.364  | 27232 | 2 | 883.51  | 4.98   |
| P23905 DGAL_SALTY D-galactose-binding periplasmic protein    | 4  |                       | IEVVIANN DAMAMGAVEALK          | 226 | 20 | 7  | 19.56 | b2°b2b10b12y2y10y12          | 2059.07 | 90.053  | 9589  | 3 | 687.03  | 5.57   |
| P23905 DGAL_SALTY D-galactose-binding periplasmic protein    | 5  |                       | ELNDK                          | 187 | 5  | 1  | 13.14 | y3                           | 618.31  | 80.586  | 14702 | 1 | 618.31  | -0.20  |
| P23905 DGAL_SALTY D-galactose-binding periplasmic protein    | 6  |                       | GQNVPVVFFNK                    | 104 | 11 | 6  | 50.39 | b5°b5b6b8y4y5                | 1248.65 | 58.991  | 13469 | 2 | 624.83  | -15.93 |
| P23905 DGAL_SALTY D-galactose-binding periplasmic protein    | 7  |                       | MDAWLSGPNANK                   | 214 | 12 | 3  | 22.09 | b3b6y4                       | 1303.64 | 57.438  | 1762  | 2 | 652.32  | 21.07  |
| P23905 DGAL_SALTY D-galactose-binding periplasmic protein    | 8  |                       | GIQTEQLALDTAMWDTAQAK           | 192 | 20 | 4  | 14.24 | b8b10°b10y9                  | 2191.05 | 68.186  | 1598  | 3 | 731.02  | -7.13  |
| P23905 DGAL_SALTY D-galactose-binding periplasmic protein    | 9  |                       | SAPDVQLLMNDSQNDQSKQNDQI DVLLAK | 52  | 29 | 4  | 21.88 | b9b10y15*y15                 | 3227.57 | 94.012  | 54359 | 3 | 1076.53 | -4.24  |
| P23905 DGAL_SALTY D-galactose-binding periplasmic protein    | 10 |                       | DGKSAPDVQLLMNDSQNDQSK          | 49  | 21 | 3  | 13.75 | b6b12y4                      | 2290.05 | 59.011  | 6942  | 3 | 764.02  | -3.41  |
| P23905 DGAL_SALTY D-galactose-binding periplasmic protein    | 11 |                       | ALDSYDKAYYVGTD SK              | 120 | 16 | 5  | 34.84 | y5y6y8y12°y12                | 1795.86 | 93.833  | 4710  | 2 | 898.43  | 12.03  |
| P23905 DGAL_SALTY D-galactose-binding periplasmic protein    | 12 | Phosphoryl STY(12)    | VPYVGVDKDNLSEFTQK              | 315 | 17 | 4  | 27.17 | b3y4y5y10                    | 2018.95 | 67.975  | 9375  | 3 | 673.65  | 5.38   |
| P23905 DGAL_SALTY D-galactose-binding periplasmic protein    | 13 | Oxidation+M(4)        | SGAMAGTVLNDANNQAK              | 269 | 17 | 3  | 16.17 | b4b10y3                      | 1677.80 | 45.040  | 8868  | 4 | 420.21  | 8.37   |
| P0A1A5 ILVE_SALTY Branched-chain-amino-acid aminotransferase | 1  |                       | AAPNTIPTAAK                    | 149 | 11 | 7  | 55.62 | b2b5y2y3y5y7y8               | 1054.58 | 31.928  | 22036 | 2 | 527.79  | -8.22  |
| P0A1A5 ILVE_SALTY Branched-chain-amino-acid aminotransferase | 2  |                       | IQQAF FGLTGETEDK               | 284 | 16 | 3  | 25.38 | y4y12y13                     | 1830.90 | 78.552  | 8352  | 2 | 915.95  | 4.07   |

|                                                               |    |                                           |                                 |     |    |    |       |                                |         |         |        |   |         |        |
|---------------------------------------------------------------|----|-------------------------------------------|---------------------------------|-----|----|----|-------|--------------------------------|---------|---------|--------|---|---------|--------|
| [P0A1A5]ILVE_SALTY Branched-chain-amino-acid aminotransferase | 3  |                                           | AGGNYLSSLLVGSEAR                | 160 | 16 | 4  | 17    | b7°b7b11y4                     | 1593.81 | 91.708  | 5031   | 2 | 797.41  | -8.12  |
| [P0A1A5]ILVE_SALTY Branched-chain-amino-acid aminotransferase | 4  |                                           | DGVLFTPPFTSSALPGITR             | 204 | 19 | 3  | 14.8  | b6y13y15                       | 1976.05 | 92.979  | 9933   | 2 | 988.53  | 0.43   |
| [P0A1A5]ILVE_SALTY Branched-chain-amino-acid aminotransferase | 5  |                                           | SVDGIQVGEGR                     | 266 | 11 | 3  | 24.11 | b10y4y7                        | 1116.56 | 27.380  | 7111   | 2 | 558.79  | -0.22  |
| [P0A1A5]ILVE_SALTY Branched-chain-amino-acid aminotransferase | 6  |                                           | ADYIWFNGEMVR                    | 5   | 12 | 4  | 22.09 | b6b8y5°y5                      | 1500.71 | 68.412  | 5009   | 3 | 500.91  | 13.75  |
| [P0A1A5]ILVE_SALTY Branched-chain-amino-acid aminotransferase | 7  | Carbamidomethyl+C(14)                     | FPVQSIDELMEACR                  | 69  | 15 | 3  | 26.06 | b3b7b9                         | 1781.84 | 69.836  | 3189   | 2 | 891.42  | 12.19  |
| [P0A1A5]ILVE_SALTY Branched-chain-amino-acid aminotransferase | 8  |                                           | AAPNTIPTAAKAGGNYLSSLLVGS<br>EAR | 149 | 27 | 3  | 22.68 | b3b4b7                         | 2629.37 | 81.799  | 9157   | 2 | 1315.19 | -8.26  |
| [P0A1A5]ILVE_SALTY Branched-chain-amino-acid aminotransferase | 9  | Carbamidomethyl+C(14)<br>;Oxidation+M(11) | FPVQSIDELMEACRDVIR              | 69  | 19 | 5  | 42.6  | b7b8b10b11y9                   | 2281.09 | 107.261 | 104934 | 2 | 1141.05 | -1.61  |
| [P0AA19]OMPR_SALTY Transcriptional regulatory protein ompR    | 1  |                                           | QANELPGAPSQEEAVIAFGK            | 122 | 20 | 5  | 22.41 | b5b8°b8b10y15                  | 2056.07 | 68.476  | 6365   | 2 | 1028.54 | 14.84  |
| [P0AA19]OMPR_SALTY Transcriptional regulatory protein ompR    | 2  |                                           | YIQTVWGLGYVFVPDGSK              | 220 | 18 | 6  | 26.36 | b4°b4b6b7°b7y4                 | 2029.07 | 117.686 | 3180   | 3 | 677.03  | 14.02  |
| [P0AA19]OMPR_SALTY Transcriptional regulatory protein ompR    | 3  |                                           | SVANAEQMDR                      | 32  | 10 | 3  | 36.71 | b4b5b6                         | 1120.53 | 117.504 | 1746   | 1 | 1120.53 | 20.37  |
| [P0AA19]OMPR_SALTY Transcriptional regulatory protein ompR    | 4  | Carbamidomethyl+C(21)                     | ESFHLMVLDLMLPGEDGLSICR          | 46  | 22 | 4  | 19.84 | y3y6y12°y12                    | 2532.26 | 71.790  | 1648   | 3 | 844.76  | 13.59  |
| [P0AA19]OMPR_SALTY Transcriptional regulatory protein ompR    | 5  |                                           | MQENYKILVDDDMR                  | 0   | 15 | 4  | 24    | b8b9y12*y12                    | 1868.91 | 88.905  | 5143   | 2 | 934.96  | 12.67  |
| [P0AA19]OMPR_SALTY Transcriptional regulatory protein ompR    | 6  |                                           | SQSNPMPIIMVTAKGEEVDR            | 71  | 20 | 10 | 37.23 | b8*b8b11*b11y3°y3y5y8°y<br>8y9 | 2202.09 | 136.299 | 5045   | 2 | 1101.55 | -1.66  |
| [P0AA19]OMPR_SALTY Transcriptional regulatory protein ompR    | 7  |                                           | YLTEQGFQVRSVANAEQMDR            | 22  | 20 | 3  | 14.24 | b8b13y4                        | 2342.14 | 97.221  | 1646   | 2 | 1171.57 | 9.28   |
| [P0AA19]OMPR_SALTY Transcriptional regulatory protein ompR    | 8  | Carbamidomethyl+C(25)<br>;Oxidation+M()   | LLTRESFHLMVLDLMLPGEDGLSI<br>CR  | 42  | 26 | 5  | 22.64 | b8y3y4y8°y8                    | 3031.56 | 136.310 | 9295   | 3 | 1011.19 | 4.83   |
| [P55900]SERC_SALTY Phohoserine aminotransferase               | 1  |                                           | AQVFNFSSGPAMLPAEVLK             | 1   | 19 | 7  | 31.34 | b7*b7b8b12y3y6y19              | 2006.05 | 91.585  | 30927  | 2 | 1003.53 | 5.84   |
| [P55900]SERC_SALTY Phohoserine aminotransferase               | 2  | Carbamidomethyl+C(7)                      | LAQQELCDWHGLGTSVMEISHR          | 20  | 22 | 8  | 45.38 | b3b5b6b10y6y7y13y22            | 2567.24 | 128.373 | 12031  | 3 | 856.42  | 8.84   |
| [P55900]SERC_SALTY Phohoserine aminotransferase               | 3  |                                           | ALTDFMIDFER                     | 348 | 11 | 4  | 24.11 | b5y2y3y9                       | 1357.65 | 90.909  | 9756   | 2 | 679.33  | 0.18   |
| [P55900]SERC_SALTY Phohoserine aminotransferase               | 4  |                                           | GKEFIQVAEEAEQDFR                | 42  | 16 | 5  | 17    | b10b13y6*y6y16                 | 1895.93 | 52.299  | 5325   | 3 | 632.65  | 7.92   |
| [P55900]SERC_SALTY Phohoserine aminotransferase               | 5  |                                           | AELLYGVIDNSDFYR                 | 272 | 15 | 4  | 25.55 | b6b12y5y11                     | 1774.87 | 108.493 | 2145   | 2 | 887.94  | 0.41   |
| [P55900]SERC_SALTY Phohoserine aminotransferase               | 6  |                                           | ITVDGK                          | 122 | 6  | 1  | 13.55 | b4                             | 632.36  | 28.285  | 12670  | 1 | 632.36  | -8.49  |
| [P55900]SERC_SALTY Phohoserine aminotransferase               | 7  |                                           | MNVPFQLADNTLDK                  | 297 | 14 | 3  | 24.55 | b6y8y9                         | 1605.82 | 68.909  | 12099  | 3 | 535.95  | 16.95  |
| [P55900]SERC_SALTY Phohoserine aminotransferase               | 8  |                                           | MAQVFNFSSGPAMLPAEVLK            | 0   | 20 | 6  | 56.45 | b4b5b6b8b10b11                 | 2137.06 | 90.164  | 4417   | 3 | 713.02  | -11.77 |
| [P55900]SERC_SALTY Phohoserine aminotransferase               | 9  |                                           | EFIQVAEEAEQDFR                  | 44  | 14 | 3  | 19.11 | b12y4y7                        | 1710.83 | 72.909  | 3819   | 3 | 570.95  | 17.41  |
| [P55900]SERC_SALTY Phohoserine aminotransferase               | 10 | Carbamidomethyl+C(4)                      | VLFCHGGGR                       | 68  | 9  | 4  | 44.67 | b5b7y4y5                       | 1002.48 | 114.753 | 1721   | 1 | 1002.48 | -9.01  |

|                                                |    |                   |                            |     |    |    |       |                                 |         |         |       |   |         |        |
|------------------------------------------------|----|-------------------|----------------------------|-----|----|----|-------|---------------------------------|---------|---------|-------|---|---------|--------|
| P55900 SERC_SALTY Phohoserine aminotransferase | 11 |                   | AQGGVAAMHK                 | 257 | 10 | 5  | 52.2  | b7b9y4y5y8                      | 969.50  | 70.548  | 1704  | 2 | 485.25  | 5.92   |
| P55900 SERC_SALTY Phohoserine aminotransferase | 12 |                   | AELLYGVIDNSDFYRNDVAQANR    | 272 | 23 | 3  | 12.94 | b4b14y5                         | 2643.26 | 79.524  | 19976 | 3 | 881.76  | -6.56  |
| P55900 SERC_SALTY Phohoserine aminotransferase | 13 |                   | ASIYNAMPIEGVKALTDFMIDFER   | 335 | 24 | 5  | 19.27 | b6y5y7°y7y17                    | 2731.34 | 121.423 | 3819  | 2 | 1366.17 | -4.11  |
| P55900 SERC_SALTY Phohoserine aminotransferase | 14 |                   | SRMNVPFQLADNTLDDK          | 295 | 16 | 3  | 17    | b14y6y8                         | 1848.93 | 107.428 | 3189  | 2 | 924.97  | -1.12  |
| P55900 SERC_SALTY Phohoserine aminotransferase | 15 | Phosphoryl STY(8) | AQVFNFSSGPAMPLPAEVLK       | 1   | 19 | 3  | 14.8  | b4b7y12                         | 2086.03 | 136.448 | 1693  | 2 | 1043.52 | 13.46  |
| P55900 SERC_SALTY Phohoserine aminotransferase | 16 | Oxidation+M(12)   | AQVFNFSSGPAMPLPAEVLK       | 1   | 19 | 3  | 21.76 | b8b10b12                        | 2022.06 | 66.689  | 1527  | 3 | 674.69  | 12.01  |
| P52616 FLJB_SALTY Phase 2 flagellin            | 1  |                   | AQILQQAGTSVLAQANQPQNVLSLLR | 479 | 27 | 12 | 34.59 | b2*b2b3*b3b5b7b9y1y4y9y13y27    | 2860.60 | 105.857 | 81419 | 3 | 954.21  | 0.17   |
| P52616 FLJB_SALTY Phase 2 flagellin            | 2  |                   | SQSALGTAIER                | 20  | 11 | 5  | 31.1  | b2y6y8y9y11                     | 1132.59 | 41.869  | 42239 | 2 | 566.80  | -5.17  |
| P52616 FLJB_SALTY Phase 2 flagellin            | 3  |                   | INSAKDDAAGQAIANR           | 37  | 16 | 5  | 48.06 | y3y4y5y6y16                     | 1614.80 | 30.442  | 42229 | 3 | 538.94  | -11.64 |
| P52616 FLJB_SALTY Phase 2 flagellin            | 4  |                   | VSGQTQFNGVK                | 125 | 11 | 7  | 36.46 | b2b4y5y9y10*y10y11              | 1164.60 | 33.043  | 40663 | 2 | 582.80  | -3.46  |
| P52616 FLJB_SALTY Phase 2 flagellin            | 5  |                   | AQVINTNSLSLLTQNNLNK        | 1   | 19 | 8  | 21.76 | b1b2*b2y2y7y15y17y19            | 2085.14 | 74.502  | 38558 | 2 | 1043.07 | 2.69   |
| P52616 FLJB_SALTY Phase 2 flagellin            | 6  |                   | TEVVTIDGK                  | 381 | 9  | 4  | 30.28 | b3°b3b6y5                       | 961.51  | 52.250  | 11831 | 2 | 481.26  | -13.90 |
| P52616 FLJB_SALTY Phase 2 flagellin            | 7  |                   | TAANQLGGVDGK               | 369 | 12 | 6  | 50.8  | b4b7b9y4y5y12                   | 1130.58 | 35.103  | 11368 | 2 | 565.79  | -3.89  |
| P52616 FLJB_SALTY Phase 2 flagellin            | 8  |                   | ELAVQSANSTNSQSDLDSIQAEITQR | 93  | 26 | 4  | 12.06 | b9y3*y3y6                       | 2805.36 | 70.091  | 2920  | 2 | 1403.18 | 3.31   |
| P52616 FLJB_SALTY Phase 2 flagellin            | 9  |                   | NANDGISIAQTTEGALNEINNNLQ R | 66  | 25 | 6  | 30.98 | b6b9b12b14y5y9                  | 2670.31 | 127.140 | 63916 | 3 | 890.78  | 2.29   |
| P52616 FLJB_SALTY Phase 2 flagellin            | 10 |                   | TIEGGYALK                  | 328 | 9  | 3  | 38.06 | b3b4b6                          | 951.51  | 43.622  | 33707 | 2 | 476.26  | -3.98  |
| P52616 FLJB_SALTY Phase 2 flagellin            | 11 |                   | AYANNGTTLDSVGLDDAAIK       | 189 | 20 | 6  | 45.36 | b13b14y6y11y15y16               | 2008.95 | 73.934  | 23041 | 3 | 670.32  | -17.14 |
| P52616 FLJB_SALTY Phase 2 flagellin            | 12 |                   | YFVTIGGFTGADAAK            | 234 | 15 | 4  | 29.2  | b7y8y9y14                       | 1517.78 | 59.481  | 16133 | 3 | 506.60  | 13.75  |
| P52616 FLJB_SALTY Phase 2 flagellin            | 13 |                   | AQPELAEAAAK                | 403 | 11 | 3  | 35.87 | b3b5b9                          | 1098.57 | 86.560  | 9956  | 2 | 549.79  | -11.00 |
| P52616 FLJB_SALTY Phase 2 flagellin            | 14 |                   | DTPAVVSADAK                | 288 | 11 | 4  | 31.1  | b7°b7b9b10                      | 1073.55 | 71.938  | 5413  | 2 | 537.28  | 5.23   |
| P52616 FLJB_SALTY Phase 2 flagellin            | 15 |                   | NGDYEENVATDGTVTLAAGATK     | 249 | 22 | 3  | 13.32 | b10y5y15                        | 2167.09 | 66.237  | 2739  | 3 | 723.03  | 17.80  |
| P52616 FLJB_SALTY Phase 2 flagellin            | 16 |                   | NALIAGGVDATDANGAELVKMSYTDK | 299 | 26 | 10 | 30.81 | b3*b3b10°b10b14*b14b15*b15y3y14 | 2624.29 | 76.219  | 83205 | 4 | 656.83  | 1.21   |
| P52616 FLJB_SALTY Phase 2 flagellin            | 17 |                   | QINSQTLGLDSLNVQKAYDVK      | 161 | 21 | 5  | 29.81 | b3b7b8*b8b10                    | 2334.22 | 90.014  | 9221  | 3 | 778.74  | -4.71  |
| P52616 FLJB_SALTY Phase 2 flagellin            | 18 |                   | AAGHDFKAQPELAEAAAK         | 396 | 18 | 5  | 32.35 | b10b11°b11b13b15                | 1824.92 | 82.986  | 5534  | 2 | 912.97  | 0.07   |
| P52616 FLJB_SALTY Phase 2 flagellin            | 19 |                   | AKTTSYTAADGTTK             | 355 | 14 | 3  | 26.89 | b3b4b7                          | 1415.71 | 38.751  | 3592  | 3 | 472.57  | 2.85   |
| P52616 FLJB_SALTY Phase 2 flagellin            | 20 |                   | TEVVTIDGKTYNASK            | 381 | 15 | 4  | 26.06 | b3°b3b5b6                       | 1625.85 | 84.959  | 1562  | 3 | 542.62  | 4.50   |
| P0A2B3 RS7_SALTY 30S ribosomal protein S7      | 1  |                   | WIVEAAR                    | 102 | 7  | 6  | 40.25 | b1y4°y4y5y6y7                   | 844.46  | 50.462  | 50636 | 2 | 422.73  | -10.91 |
| P0A2B3 RS7_SALTY 30S ribosomal protein S7      | 2  |                   | FVNILMVDGKK                | 25  | 11 | 3  | 31.1  | y3y4y7                          | 1263.70 | 67.425  | 43254 | 3 | 421.91  | -9.27  |
| P0A2B3 RS7_SALTY 30S ribosomal protein S7      | 3  |                   | STAESIVYSALETLAQR          | 36  | 17 | 8  | 22.7  | b7b14y2*y2y3y6*y6y17            | 1838.93 | 108.088 | 23741 | 3 | 613.65  | -13.21 |

|                                                             |   |                      |                             |     |    |    |       |                                            |         |         |        |   |         |        |
|-------------------------------------------------------------|---|----------------------|-----------------------------|-----|----|----|-------|--------------------------------------------|---------|---------|--------|---|---------|--------|
| P0A2B3 RS7_SALTY 30S ribosomal protein S7                   | 4 |                      | FGSELLAK                    | 17  | 8  | 4  | 40.66 | y3y6°y6y7                                  | 864.47  | 51.616  | 76661  | 2 | 432.74  | -11.37 |
| P0A2B3 RS7_SALTY 30S ribosomal protein S7                   | 5 |                      | NALAMR                      | 96  | 6  | 1  | 13.55 | y5                                         | 675.36  | 36.004  | 6319   | 1 | 675.36  | -0.81  |
| P0A2B3 RS7_SALTY 30S ribosomal protein S7                   | 6 |                      | LANELSDAADNK                | 119 | 12 | 4  | 26.07 | b3y7y8*y8                                  | 1260.59 | 91.707  | 1681   | 1 | 1260.59 | -10.46 |
| P0A2B3 RS7_SALTY 30S ribosomal protein S7                   | 7 |                      | LANELSDAADNKGTAVK           | 119 | 17 | 13 | 103.8 | b3b4*b4b5y5°y5y8y9y10*y10y12y13y16         | 1716.86 | 39.063  | 148432 | 3 | 572.96  | -12.16 |
| P60726 RL4_SALTY 50S ribosomal protein L4                   | 1 |                      | DATGIDPVSLIAFDK             | 170 | 15 | 9  | 45.23 | b2b3°b3b4b5y2y3y10y15                      | 1561.81 | 88.181  | 44224  | 2 | 781.41  | 0.16   |
| P60726 RL4_SALTY 50S ribosomal protein L4                   | 2 |                      | VVMTADAVK                   | 185 | 9  | 5  | 57.22 | b2y3y4y6y7                                 | 933.50  | 36.546  | 26235  | 2 | 467.25  | -6.54  |
| P60726 RL4_SALTY 50S ribosomal protein L4                   | 3 |                      | MELVLKDAQSALTVSETTFGR       | 0   | 21 | 3  | 13.75 | b4y5y12                                    | 2296.15 | 92.546  | 1559   | 2 | 1148.58 | -14.25 |
| P60726 RL4_SALTY 50S ribosomal protein L4                   | 4 |                      | DFNEALVHQVVVAYAAGAR         | 21  | 19 | 3  | 21.76 | b6b8b10                                    | 2030.03 | 54.771  | 2662   | 3 | 677.35  | -8.18  |
| P60726 RL4_SALTY 50S ribosomal protein L4                   | 5 |                      | SGGVTFARPQDHSQK             | 79  | 16 | 3  | 23.54 | b10b11y13                                  | 1685.80 | 93.654  | 2264   | 2 | 843.40  | -22.16 |
| P60726 RL4_SALTY 50S ribosomal protein L4                   | 6 |                      | SGGVTFARPQDHSQKVNK          | 79  | 19 | 14 | 74.53 | b4°b4b8°b8b9°b9b10b12y7*y7y8*y8y9°y9       | 2027.02 | 136.266 | 81275  | 2 | 1014.01 | -11.32 |
| P60726 RL4_SALTY 50S ribosomal protein L4                   | 7 |                      | DATGIDPVSLIAFDKVVMTADAVK    | 170 | 24 | 4  | 19.27 | b3b5b8y8                                   | 2476.29 | 102.422 | 44875  | 3 | 826.10  | -2.76  |
| P60726 RL4_SALTY 50S ribosomal protein L4                   | 8 |                      | VVMTADAVKQVEMLA             | 185 | 16 | 7  | 51.12 | b5b7b8b12y5y6°y6                           | 1733.88 | 95.035  | 5050   | 2 | 867.44  | -0.49  |
| P0A7Z7 RPOA_SALTY DNA-directed RNA polymerase subunit alpha | 1 |                      | LVDIEQVSSTHAK               | 12  | 13 | 4  | 33.82 | b7y3y5y11                                  | 1426.74 | 45.445  | 59981  | 3 | 476.25  | -11.89 |
| P0A7Z7 RPOA_SALTY DNA-directed RNA polymerase subunit alpha | 2 | Carbamidomethyl+C(6) | LLVDACYSPVER                | 170 | 12 | 8  | 65.49 | b2b9y2y5y6y8y9y10                          | 1421.71 | 59.123  | 48754  | 2 | 711.36  | 0.26   |
| P0A7Z7 RPOA_SALTY DNA-directed RNA polymerase subunit alpha | 3 | Carbamidomethyl+C(9) | ILLSSMPGCAVTEVEIDGVLHEYS TK | 45  | 26 | 3  | 12.06 | b10y12y19                                  | 2848.41 | 91.637  | 12256  | 3 | 950.14  | -1.20  |
| P0A7Z7 RPOA_SALTY DNA-directed RNA polymerase subunit alpha | 4 |                      | EGVQEDILEILLNLK             | 71  | 15 | 5  | 26.06 | b2b3b7°b7b8                                | 1725.96 | 124.005 | 10116  | 2 | 863.48  | -1.77  |
| P0A7Z7 RPOA_SALTY DNA-directed RNA polymerase subunit alpha | 5 |                      | LVIEMETNGTIDPEEAIK          | 200 | 18 | 4  | 26.36 | b8b14b15y11                                | 2030.05 | 83.985  | 28481  | 3 | 677.36  | 20.45  |
| P0A7Z7 RPOA_SALTY DNA-directed RNA polymerase subunit alpha | 6 |                      | AEAIHYIGDLVQR               | 271 | 13 | 4  | 27.94 | b3b4°b4b11                                 | 1484.82 | 43.364  | 11058  | 2 | 742.91  | 19.98  |
| P0A7Z7 RPOA_SALTY DNA-directed RNA polymerase subunit alpha | 7 |                      | GYVPASTR                    | 150 | 8  | 3  | 35.89 | b7y3y5                                     | 850.43  | 28.240  | 5600   | 2 | 425.72  | -12.56 |
| P0A7Z7 RPOA_SALTY DNA-directed RNA polymerase subunit alpha | 8 |                      | GYVPASTRIHSEEDERPIGR        | 150 | 20 | 4  | 22.41 | b9b11b13y10                                | 2269.13 | 69.175  | 43651  | 3 | 757.05  | 1.18   |
| P0A7Z7 RPOA_SALTY DNA-directed RNA polymerase subunit alpha | 9 | Carbamidomethyl+C(4) | SANCLKAEAIHYIGDLVQR         | 265 | 19 | 5  | 23.44 | b3b10*b10b14y12                            | 2158.09 | 98.412  | 4116   | 3 | 720.03  | -8.48  |
| P0A2C5 RBSB_SALTY D-ribose-binding periplasmic protein      | 1 |                      | ILLINPTSDAVGNAVK            | 84  | 17 | 15 | 91.04 | b2b3b4b5y1y2y10y11y12*y12y13*y13y14*y14y17 | 1739.96 | 70.639  | 58502  | 2 | 870.48  | 1.75   |
| P0A2C5 RBSB_SALTY D-ribose-binding periplasmic protein      | 2 |                      | LAATIAQLPDQIGAK             | 253 | 15 | 4  | 17.98 | b3y7y9y15                                  | 1509.85 | 66.023  | 52884  | 2 | 755.43  | -6.55  |
| P0A2C5 RBSB_SALTY D-ribose-binding periplasmic protein      | 3 |                      | IAGDYIAK                    | 135 | 8  | 4  | 35.89 | b7y4y7y8                                   | 850.46  | 35.830  | 11227  | 2 | 425.73  | -7.46  |

|                                                        |    |                   |                               |     |    |    |       |                               |         |         |        |   |         |        |
|--------------------------------------------------------|----|-------------------|-------------------------------|-----|----|----|-------|-------------------------------|---------|---------|--------|---|---------|--------|
| P0A2C5 RBSB_SALTY D-ribose-binding periplasmic protein | 4  |                   | ADVMVVGFDGTPDGEK              | 231 | 16 | 6  | 28.1  | b12y11y13°y13y14°y14          | 1636.77 | 63.388  | 7657   | 2 | 818.89  | 10.22  |
| P0A2C5 RBSB_SALTY D-ribose-binding periplasmic protein | 5  |                   | ELANVQDLTVR                   | 70  | 11 | 3  | 24.11 | b4b10y8                       | 1257.67 | 57.538  | 6698   | 2 | 629.34  | -6.70  |
| P0A2C5 RBSB_SALTY D-ribose-binding periplasmic protein | 6  |                   | VIELQGIAGTSAAR                | 150 | 14 | 4  | 44.51 | y5y6y9y10                     | 1385.77 | 58.696  | 21767  | 2 | 693.39  | -4.93  |
| P0A2C5 RBSB_SALTY D-ribose-binding periplasmic protein | 7  |                   | AGEGAK                        | 144 | 6  | 1  | 13.55 | y5                            | 532.28  | 28.337  | 7796   | 1 | 532.28  | 12.61  |
| P0A2C5 RBSB_SALTY D-ribose-binding periplasmic protein | 8  |                   | FNVLASQPADFDR                 | 178 | 13 | 4  | 27.94 | y3y11y12°y12                  | 1479.74 | 105.954 | 2054   | 2 | 740.37  | 12.13  |
| P0A2C5 RBSB_SALTY D-ribose-binding periplasmic protein | 9  |                   | FNVLASQPADFDRTK               | 178 | 15 | 3  | 17.98 | b13y7y11                      | 1708.87 | 86.696  | 35709  | 2 | 854.94  | 5.50   |
| P0A2C5 RBSB_SALTY D-ribose-binding periplasmic protein | 10 | Phosphoryl STY(7) | ILLINPTDSDAVGNAVK             | 84  | 17 | 4  | 16.17 | b8°b8b13y9                    | 1819.93 | 82.774  | 2557   | 2 | 910.47  | 8.59   |
| P0A2C5 RBSB_SALTY D-ribose-binding periplasmic protein | 11 |                   | AGDYIAK                       | 136 | 7  | 1  | 9.6   | b5                            | 737.38  | 35.881  | 2114   | 1 | 737.38  | -2.32  |
| P0A8B8 YBAB_SALTY UPF0133 protein ybaB                 | 1  |                   | MASVSSGMQLPPGFK               | 91  | 15 | 5  | 17.98 | b13y1y5y11y15                 | 1536.76 | 66.566  | 30525  | 2 | 768.88  | 4.77   |
| P0A8B8 YBAB_SALTY UPF0133 protein ybaB                 | 2  |                   | MQEIIAQLEVTGESGAGLVK          | 23  | 20 | 3  | 21.03 | b10b14b16                     | 2089.04 | 104.996 | 6498   | 2 | 1045.02 | -6.19  |
| P0A8B8 YBAB_SALTY UPF0133 protein ybaB                 | 3  |                   | VEIDPSLLEDDKEMLEDLVAAAFN DAAR | 54  | 28 | 3  | 11.63 | b10y6y12                      | 3089.46 | 126.806 | 2160   | 4 | 773.12  | -11.14 |
| P0A8B8 YBAB_SALTY UPF0133 protein ybaB                 | 4  |                   | EMLEDLVAAAFNDAAR              | 66  | 16 | 5  | 30.56 | b13b14y5°y5y8                 | 1735.86 | 96.931  | 1666   | 2 | 868.43  | 14.49  |
| P0A8B8 YBAB_SALTY UPF0133 protein ybaB                 | 5  |                   | EKMASVSSGMQLPPGFK             | 89  | 17 | 7  | 49.36 | b4b5b7b13°b13y9y10            | 1793.92 | 64.810  | 124382 | 2 | 897.46  | 13.13  |
| P0A8B8 YBAB_SALTY UPF0133 protein ybaB                 | 6  |                   | GGLGNLMKQAQQMQEK              | 4   | 16 | 6  | 27.43 | b5y5y7°y7y9*y9                | 1760.89 | 124.683 | 2275   | 2 | 880.95  | 5.06   |
| Q8ZP20 TREA_SALTY Periplasmic trehalase                | 1  |                   | VAAAAQAHL LQPGGLATTSVK        | 428 | 21 | 4  | 24.51 | b4b5b9y10                     | 2004.11 | 57.641  | 19379  | 3 | 668.71  | -7.49  |
| Q8ZP20 TREA_SALTY Periplasmic trehalase                | 2  |                   | TFADAIPNSDPLMILADYR           | 68  | 19 | 10 | 29.12 | b6°b6b13°b13b16y2y5°y5y13*y13 | 2123.06 | 101.976 | 15275  | 2 | 1062.03 | 6.90   |
| Q8ZP20 TREA_SALTY Periplasmic trehalase                | 3  |                   | SNPNRPATEIYR                  | 296 | 12 | 3  | 26.07 | b8y6y7                        | 1417.72 | 33.471  | 4789   | 2 | 709.37  | 3.87   |
| Q8ZP20 TREA_SALTY Periplasmic trehalase                | 4  |                   | TTTIAPVDLNALLYQLEK            | 335 | 18 | 3  | 15.44 | b6b11y8                       | 2003.07 | 85.425  | 8667   | 2 | 1002.04 | -20.05 |
| Q8ZP20 TREA_SALTY Periplasmic trehalase                | 5  |                   | SQPPFFAFMVELLAQHEGDDALK       | 212 | 23 | 3  | 12.94 | b9y10y13                      | 2590.22 | 128.303 | 3563   | 3 | 864.08  | -16.12 |
| Q8ZP20 TREA_SALTY Periplasmic trehalase                | 6  |                   | DTPRPESWVEDIATAK              | 280 | 16 | 3  | 17    | b12y8y10                      | 1814.90 | 112.727 | 3523   | 2 | 907.95  | 5.18   |
| Q8ZP20 TREA_SALTY Periplasmic trehalase                | 7  |                   | TYYLSR                        | 206 | 6  | 1  | 13.55 | b4                            | 802.41  | 37.886  | 1825   | 1 | 802.41  | -1.06  |
| Q8ZP20 TREA_SALTY Periplasmic trehalase                | 8  |                   | FLTNVQHTYDREK                 | 486 | 13 | 3  | 20.46 | b4b11y5                       | 1650.83 | 83.536  | 25414  | 3 | 550.95  | 3.99   |
| Q8ZP20 TREA_SALTY Periplasmic trehalase                | 9  |                   | ASAAAGDRAK                    | 357 | 10 | 3  | 33.7  | y4y5y9                        | 917.49  | 19.985  | 10103  | 2 | 459.25  | 5.65   |
| Q8ZP20 TREA_SALTY Periplasmic trehalase                | 10 |                   | DTPRPESWVEDIATAKSNPNRPAT EIYR | 280 | 28 | 4  | 22.18 | b7b9b10y13                    | 3213.62 | 125.755 | 7654   | 3 | 1071.88 | 7.98   |
| Q8ZP20 TREA_SALTY Periplasmic trehalase                | 11 |                   | SNPNRPATEIYRDLR               | 296 | 15 | 4  | 26.06 | b5b7*b7b8                     | 1801.90 | 90.128  | 2784   | 2 | 901.46  | -14.29 |
| Q8ZP20 TREA_SALTY Periplasmic trehalase                | 12 | Phosphoryl STY(4) | DQLTAAALFLYVNAAAK             | 405 | 18 | 3  | 22.84 | b13_H3PO4 b13y14y15           | 1956.97 | 122.331 | 2853   | 2 | 978.99  | -3.12  |
| Q8ZP20 TREA_SALTY Periplasmic trehalase                | 13 | Oxidation+M(13)   | TFADAIPNSDPLMILADYR           | 68  | 19 | 3  | 21.76 | b4b7b13                       | 2139.04 | 102.916 | 35704  | 3 | 713.68  | -1.37  |
| Q7CPD8 YIFE_SALTY UPF0438 protein yifE                 | 1  |                   | AESFTTTNR                     | 1   | 9  | 5  | 54.21 | y4y5y6y7y9                    | 1026.49 | 27.404  | 33771  | 2 | 513.75  | 0.48   |
| Q7CPD8 YIFE_SALTY UPF0438 protein yifE                 | 2  |                   | GEREPVTD AER                  | 65  | 11 | 7  | 24.11 | b2°b2b6°b6y3°y3y5             | 1258.61 | 22.523  | 3264   | 2 | 629.81  | 6.89   |

|                                                    |    |                                             |                                       |     |    |    |       |                                     |         |         |        |   |         |        |
|----------------------------------------------------|----|---------------------------------------------|---------------------------------------|-----|----|----|-------|-------------------------------------|---------|---------|--------|---|---------|--------|
| [Q7CPD8]YIFE_SALTY UPF0438 protein yifE            | 3  |                                             | MAESFTTTNR                            | 0   | 10 | 3  | 28.47 | b9y6y7                              | 1157.54 | 97.296  | 11360  | 2 | 579.28  | 15.50  |
| [Q7CPD8]YIFE_SALTY UPF0438 protein yifE            | 4  |                                             | AESFTTTNR                             | 1   | 9  | 0  | 1.65  |                                     | 1008.48 | 27.428  | 2406   | 2 | 504.74  | 8.23   |
| [P66541]RS2_SALTY 30S ribosomal protein S2         | 1  |                                             | TVPMFNEALAE LNK                       | 45  | 14 | 5  | 27.69 | b2y3y5y12y14                        | 1576.81 | 84.646  | 118032 | 2 | 788.91  | 3.87   |
| [P66541]RS2_SALTY 30S ribosomal protein S2         | 2  |                                             | MATVSMR DMLK                          | 0   | 11 | 7  | 24.11 | b4y1y6°y6y10°y10y11                 | 1282.63 | 59.256  | 48018  | 3 | 428.21  | -3.33  |
| [P66541]RS2_SALTY 30S ribosomal protein S2         | 3  | Carbamidomethyl+C(6)                        | EAANSCDQFFVNHR                        | 81  | 14 | 5  | 30.49 | b4y1y3y7y8                          | 1694.72 | 47.369  | 41103  | 3 | 565.58  | -9.65  |
| [P66541]RS2_SALTY 30S ribosomal protein S2         | 4  |                                             | EANNLGIPVFAIVD TNSDPDG VDF VIPGNDDAIR | 174 | 34 | 13 | 30.89 | b5°b5*b5b7°b7*b7y3y8*y8y11y14y16y34 | 3569.75 | 104.757 | 26771  | 3 | 1190.59 | 2.94   |
| [P66541]RS2_SALTY 30S ribosomal protein S2         | 5  |                                             | LKDLETQSQDGT FEK                      | 113 | 15 | 5  | 25.55 | b7b9y4y6y15                         | 1738.87 | 39.073  | 4459   | 2 | 869.94  | 14.04  |
| [P66541]RS2_SALTY 30S ribosomal protein S2         | 6  |                                             | YWNPK                                 | 21  | 5  | 1  | 13.14 | b3                                  | 707.34  | 34.529  | 16942  | 2 | 354.18  | -9.41  |
| [P66541]RS2_SALTY 30S ribosomal protein S2         | 7  |                                             | ILFVGTK                               | 66  | 7  | 3  | 40.25 | y3y5y6                              | 777.48  | 57.215  | 13841  | 2 | 389.24  | -13.50 |
| [P66541]RS2_SALTY 30S ribosomal protein S2         | 8  |                                             | AGVHF GHQTR                           | 11  | 10 | 3  | 28.47 | b6b7y4                              | 1109.56 | 109.770 | 1598   | 1 | 1109.56 | -1.21  |
| [P66541]RS2_SALTY 30S ribosomal protein S2         | 9  |                                             | DLETQSQDGT FEK LTK                    | 115 | 16 | 4  | 17    | b3b13y14°y14                        | 1839.90 | 89.916  | 21252  | 2 | 920.45  | 2.45   |
| [P66541]RS2_SALTY 30S ribosomal protein S2         | 10 |                                             | TVPMFNEALAE LNKISAR                   | 45  | 18 | 4  | 24.6  | b9b12b17y3                          | 2004.03 | 107.473 | 6261   | 2 | 1002.52 | -14.07 |
| [P66541]RS2_SALTY 30S ribosomal protein S2         | 11 |                                             | NEALAE LNK                            | 50  | 9  | 0  | 3.7   |                                     | 1001.52 | 84.629  | 3199   | 2 | 501.26  | -9.45  |
| [Q8ZRC9]YAJQ_SALTY UPF0234 protein yajQ            | 1  |                                             | GIEGASLDVPDEFV HSGK                   | 72  | 18 | 5  | 26.36 | b2b11y3y10y11                       | 1856.89 | 67.059  | 40313  | 3 | 619.64  | -5.13  |
| [Q8ZRC9]YAJQ_SALTY UPF0234 protein yajQ            | 2  |                                             | VLSESD FQVNQLLDILR                    | 49  | 17 | 4  | 33.49 | y3y4y13y15                          | 1989.08 | 105.366 | 31117  | 2 | 995.04  | 6.87   |
| [Q8ZRC9]YAJQ_SALTY UPF0234 protein yajQ            | 3  |                                             | TWYVEAK                               | 90  | 7  | 4  | 37.24 | b6y3y4y7                            | 896.44  | 23.825  | 16708  | 2 | 448.72  | -11.10 |
| [Q8ZRC9]YAJQ_SALTY UPF0234 protein yajQ            | 4  |                                             | PSFDIVSEVD LQEAR                      | 1   | 15 | 5  | 36.47 | y6y7°y7y10y12                       | 1704.86 | 84.494  | 5098   | 2 | 852.93  | 7.73   |
| [Q8ZRC9]YAJQ_SALTY UPF0234 protein yajQ            | 5  |                                             | QGIESAVQK                             | 99  | 9  | 4  | 30.28 | b4y4*y4y6                           | 959.53  | 30.100  | 19554  | 2 | 480.27  | 17.05  |
| [Q8ZRC9]YAJQ_SALTY UPF0234 protein yajQ            | 6  |                                             | GVEATIELNDANK                         | 33  | 13 | 3  | 20.46 | b7b10y5                             | 1373.70 | 97.225  | 3945   | 2 | 687.35  | 7.29   |
| [Q8ZRC9]YAJQ_SALTY UPF0234 protein yajQ            | 7  |                                             | GIEGASLDVPDEFV HSGKTWYVEAK            | 72  | 25 | 10 | 61.15 | b4b9b12b13y3y4y6°y6y7y10            | 2734.35 | 90.024  | 6175   | 3 | 912.12  | 6.79   |
| [P26219]CDH_SALTY CDP-diacylglycerol pyrophohatase | 1  |                                             | YGH DIPSAVSLAINSR                     | 112 | 17 | 5  | 27.17 | b5b6b15y11y17                       | 1814.92 | 52.247  | 34389  | 3 | 605.65  | 11.77  |
| [P26219]CDH_SALTY CDP-diacylglycerol pyrophohatase | 2  | Carbamidomethyl+C(11)                       | SQDHLHIHISCI RPDVREQLDNDLTR           | 132 | 26 | 3  | 21.83 | b7y8y9                              | 3167.58 | 93.514  | 6934   | 4 | 792.65  | 1.39   |
| [P26219]CDH_SALTY CDP-diacylglycerol pyrophohatase | 3  |                                             | HGPLQYLLMPTYR                         | 68  | 13 | 7  | 39.04 | b2b6y2y3y4°y4y5                     | 1588.84 | 70.644  | 6284   | 2 | 794.92  | 5.92   |
| [P26219]CDH_SALTY CDP-diacylglycerol pyrophohatase | 4  |                                             | SPFMMLAE EVPEAR                       | 188 | 14 | 5  | 30.49 | b7b11b12y11y14                      | 1606.77 | 73.308  | 3020   | 2 | 803.89  | 6.00   |
| [P26219]CDH_SALTY CDP-diacylglycerol pyrophohatase | 5  | Carbamidomethyl+C(7); Carbamidomethyl+C(20) | EIVLEQCLPDQLQHQNPA PCAEVKPR           | 33  | 26 | 6  | 15.63 | b8°b8b10°b10y10y22                  | 3069.51 | 133.868 | 18036  | 3 | 1023.84 | -4.37  |
| [P26219]CDH_SALTY CDP-diacylglycerol pyrophohatase | 6  |                                             | INGTESPLLEPATPNFFW LAWQAR             | 81  | 25 | 3  | 12.31 | b3b5y11                             | 2871.49 | 97.473  | 4897   | 4 | 718.63  | 3.66   |
| [P26219]CDH_SALTY CDP-diacylglycerol pyrophohatase | 7  |                                             | GYMSK                                 | 106 | 5  | 1  | 13.14 | y4                                  | 585.28  | 79.583  | 4671   | 1 | 585.28  | 11.78  |
| [P26219]CDH_SALTY CDP-diacylglycerol pyrophohatase | 8  | Carbamidomethyl+C(18)                       | NLLTFNRASAE EIQDHSCAILSSR             | 227 | 24 | 3  | 22.9  | y10y12y13                           | 2732.34 | 98.925  | 2375   | 4 | 683.84  | 0.80   |
| [P26219]CDH_SALTY CDP-diacylglycerol pyrophohatase | 9  | Oxidation+M()                               | SPFMMLAE EVPEAR DHMGR                 | 188 | 19 | 3  | 14.8  | b6b11y7                             | 2218.98 | 97.013  | 8415   | 4 | 555.50  | -10.89 |

|                                                                                     |    |                       |                                       |      |    |    |       |                                      |         |         |       |   |         |        |
|-------------------------------------------------------------------------------------|----|-----------------------|---------------------------------------|------|----|----|-------|--------------------------------------|---------|---------|-------|---|---------|--------|
| [P0A1C3]ACCA_SALTY Acetyl-coenzyme A carboxylase carboxyl transferase subunit alpha | 1  |                       | SLNFLDFEQPIAELEAK                     | 1    | 17 | 3  | 24.82 | y5y14y15                             | 1964.02 | 108.333 | 10469 | 3 | 655.34  | 9.45   |
| [P0A1C3]ACCA_SALTY Acetyl-coenzyme A carboxylase carboxyl transferase subunit alpha | 2  |                       | FNMPIITFIDTPGAYPGVGAEER               | 152  | 23 | 7  | 41.7  | b5b10y8°y8y11y12y13                  | 2495.25 | 113.848 | 9392  | 3 | 832.42  | 10.18  |
| [P0A1C3]ACCA_SALTY Acetyl-coenzyme A carboxylase carboxyl transferase subunit alpha | 3  |                       | LAFDEFDELAGDR                         | 80   | 13 | 3  | 20.46 | b5y3y9                               | 1497.68 | 40.099  | 9507  | 2 | 749.35  | -1.96  |
| [P0A1C3]ACCA_SALTY Acetyl-coenzyme A carboxylase carboxyl transferase subunit alpha | 4  |                       | APLAAEAMGIIAPR                        | 243  | 14 | 3  | 19.11 | b8b10y13                             | 1380.75 | 45.051  | 4891  | 2 | 690.88  | -11.49 |
| [P0A1C3]ACCA_SALTY Acetyl-coenzyme A carboxylase carboxyl transferase subunit alpha | 5  | Carbamidomethyl+C(17) | VNMLQYSTYSVISPEGCASILWKS ADK          | 216  | 27 | 14 | 79.4  | b3b4b6b8b9b10*b10b11*b11y3°y3y5y6°y6 | 3047.50 | 133.852 | 36176 | 4 | 762.63  | 5.61   |
| [P0A1C3]ACCA_SALTY Acetyl-coenzyme A carboxylase carboxyl transferase subunit alpha | 6  |                       | FNMPIITFIDTPGAYPGVGAEERGQ SEAIAR      | 152  | 31 | 3  | 11.2  | b6b14y15                             | 3307.66 | 80.350  | 9112  | 4 | 827.67  | 4.28   |
| [P0A1C3]ACCA_SALTY Acetyl-coenzyme A carboxylase carboxyl transferase subunit alpha | 7  |                       | NFGMPAPEGYRK                          | 130  | 12 | 3  | 29.29 | b3b4b6                               | 1366.65 | 14.710  | 5799  | 3 | 456.22  | -3.57  |
| [P0A1C3]ACCA_SALTY Acetyl-coenzyme A carboxylase carboxyl transferase subunit alpha | 8  |                       | SLNFLDFEQPIAELEAKIDSLTAVS R           | 1    | 26 | 8  | 47.02 | b6b7*b7b10b13b22b23y8                | 2906.49 | 71.992  | 4654  | 3 | 969.50  | -7.06  |
| [P0A1C3]ACCA_SALTY Acetyl-coenzyme A carboxylase carboxyl transferase subunit alpha | 9  |                       | QDEKLDINIDEEVHR                       | 27   | 15 | 4  | 40.45 | b5b6b7b12                            | 1852.90 | 78.664  | 2112  | 2 | 926.96  | -0.07  |
| [P0A1C3]ACCA_SALTY Acetyl-coenzyme A carboxylase carboxyl transferase subunit alpha | 10 | Oxidation+M(3)        | FNMPIITFIDTPGAYPGVGAEER               | 152  | 23 | 7  | 31.29 | b5b10°b10b15y6y8y16                  | 2511.24 | 87.847  | 19368 | 2 | 1256.12 | 6.71   |
| [P10503]PUTA_SALTY Bifunctional protein putA                                        | 1  |                       | EAVDFLHYIYAGQVR                       | 744  | 14 | 6  | 30.49 | b3b4b13*b13y8y14                     | 1667.84 | 67.502  | 37680 | 2 | 834.42  | 13.03  |
| [P10503]PUTA_SALTY Bifunctional protein putA                                        | 2  |                       | DIVGWGREATESEVEQALQNAVN QAPVWFATPPQER | 670  | 36 | 6  | 12.55 | b6b10y5*y5y10*y10                    | 4022.99 | 107.508 | 12569 | 4 | 1006.50 | 6.49   |
| [P10503]PUTA_SALTY Bifunctional protein putA                                        | 3  | Carbamidomethyl+C(3)  | TVCEAVAAREGAIVSVQG FAR                | 1266 | 21 | 4  | 29.81 | b8b12b16b17                          | 2191.15 | 88.777  | 12349 | 3 | 731.06  | 10.59  |
| [P10503]PUTA_SALTY Bifunctional protein putA                                        | 4  |                       | QFADLAQAGTQR                          | 1161 | 12 | 8  | 35.9  | b9°b9b11*b11y6y7°y7y12               | 1305.67 | 62.969  | 11871 | 2 | 653.34  | 9.44   |
| [P10503]PUTA_SALTY Bifunctional protein putA                                        | 5  |                       | GETVGAQLTADAR                         | 834  | 13 | 7  | 29.41 | b2b5°b5b9y3y8y13                     | 1288.67 | 64.810  | 6843  | 2 | 644.84  | 12.31  |
| [P10503]PUTA_SALTY Bifunctional protein putA                                        | 6  |                       | GVMFTGSTEVATLLQR                      | 849  | 16 | 5  | 34.84 | b5b7°b7b11b12                        | 1709.90 | 90.136  | 6554  | 3 | 570.64  | 4.07   |
| [P10503]PUTA_SALTY Bifunctional protein putA                                        | 7  |                       | WQAKPVLEQPVADGEMTPVINPA EPK           | 644  | 26 | 5  | 25.41 | b3b15y5y6y26                         | 2844.43 | 106.131 | 6420  | 3 | 948.81  | -11.24 |
| [P10503]PUTA_SALTY Bifunctional protein putA                                        | 8  |                       | LLENGANTSFVNR                         | 556  | 13 | 4  | 20.46 | b4y2y5y8                             | 1434.72 | 54.769  | 4996  | 2 | 717.87  | -7.57  |
| [P10503]PUTA_SALTY Bifunctional protein putA                                        | 9  | Carbamidomethyl+C(10) | VYTDVSYLACAK                          | 459  | 12 | 6  | 40    | b4y7°y7y8y9y12                       | 1389.67 | 62.925  | 4049  | 3 | 463.89  | -4.92  |
| [P10503]PUTA_SALTY Bifunctional protein putA                                        | 10 |                       | DALIR                                 | 181  | 5  | 1  | 13.14 | y3                                   | 587.35  | 57.447  | 22266 | 1 | 587.35  | -8.42  |
| [P10503]PUTA_SALTY Bifunctional protein putA                                        | 11 |                       | LTTDIGPVIDSEAK                        | 951  | 14 | 3  | 19.11 | b7y4y6                               | 1458.74 | 76.419  | 8458  | 2 | 729.87  | -20.42 |
| [P10503]PUTA_SALTY Bifunctional protein putA                                        | 12 |                       | SLSVNTAAAGGNASLMTIG                   | 1301 | 19 | 4  | 23.98 | b6°b6b8b9                            | 1734.87 | 123.527 | 7457  | 2 | 867.94  | 1.13   |
| [P10503]PUTA_SALTY Bifunctional protein putA                                        | 13 |                       | RPETDAVSMLMEQAR                       | 100  | 15 | 4  | 17.98 | b3°b3b7y10                           | 1733.80 | 48.668  | 4786  | 3 | 578.61  | -17.18 |
| [P10503]PUTA_SALTY Bifunctional protein putA                                        | 14 | Carbamidomethyl+C(5)  | LNRPCR                                | 532  | 6  | 1  | 13.55 | y5                                   | 815.44  | 47.071  | 3619  | 2 | 408.22  | 10.78  |



|                                                 |    |                       |                                        |      |    |    |       |                             |         |         |       |   |         |        |
|-------------------------------------------------|----|-----------------------|----------------------------------------|------|----|----|-------|-----------------------------|---------|---------|-------|---|---------|--------|
| P10503 PUTA_SALTY Bifunctional protein putA     | 15 |                       | DLYGEGR                                | 609  | 7  | 3  | 37.24 | b4b5y3                      | 809.40  | 84.540  | 2765  | 1 | 809.40  | 20.06  |
| P10503 PUTA_SALTY Bifunctional protein putA     | 16 | Carbamidomethyl+C(3)  | VLCLQDDIAEHTLKMLR                      | 921  | 17 | 5  | 25.92 | b8*b8b10b12y12              | 2055.08 | 94.883  | 25093 | 2 | 1028.04 | 2.14   |
| P10503 PUTA_SALTY Bifunctional protein putA     | 17 |                       | DLYGEGRINSAGLDLANEHR                   | 609  | 20 | 3  | 22.37 | b7y6y7                      | 2200.10 | 88.864  | 8238  | 2 | 1100.55 | 12.10  |
| P10503 PUTA_SALTY Bifunctional protein putA     | 18 |                       | AETLMAQPFDAVIFHGSDSKLR                 | 1244 | 22 | 5  | 17.98 | b7*b7b11y6y9                | 2461.22 | 111.253 | 6671  | 3 | 821.08  | 2.08   |
| P10503 PUTA_SALTY Bifunctional protein putA     | 19 |                       | SPSLFVNAATWGLLFTGRLVSTH NEANLSR        | 200  | 30 | 3  | 11.32 | b7y7y15                     | 3258.70 | 88.263  | 2529  | 3 | 1086.91 | 0.15   |
| P10503 PUTA_SALTY Bifunctional protein putA     | 20 |                       | MGNPGRLTTDIGPVIDSEAK                   | 945  | 20 | 3  | 14.24 | b3b10y10                    | 2071.07 | 91.990  | 1634  | 3 | 691.03  | 10.61  |
| P10503 PUTA_SALTY Bifunctional protein putA     | 21 | Oxidation+M(5)        | AETLMAQPFDAVIFHGSDK                    | 1244 | 20 | 4  | 14.24 | b6y11*y11y13                | 2208.04 | 54.996  | 34807 | 3 | 736.69  | 7.08   |
| P10503 PUTA_SALTY Bifunctional protein putA     | 22 |                       | MFTGSTEVATLLQR                         | 851  | 14 | 1  | 7.25  | b3                          | 1553.80 | 90.230  | 8867  | 2 | 777.41  | 3.06   |
| P0A2F0 RPOE_SALTY RNA polymerase sigma-E factor | 1  | Carbamidomethyl+C(16) | ELDGLSYEEIAAIMDCPVGTVR                 | 149  | 22 | 4  | 17.98 | b13b15y10y12                | 2438.15 | 102.065 | 3851  | 3 | 813.39  | -1.30  |
| P0A2F0 RPOE_SALTY RNA polymerase sigma-E factor | 2  |                       | RPPSSDVDAIEAENFESGGALKEIS NPENLMLSEELR | 91   | 37 | 8  | 26.53 | b6b9*b9b14*b14y6y13y14      | 4043.96 | 102.332 | 3180  | 3 | 1348.66 | 1.75   |
| P0A2F0 RPOE_SALTY RNA polymerase sigma-E factor | 3  |                       | RPPSSDVDAIEAENFESGGALK                 | 91   | 22 | 3  | 13.32 | b4b13y8                     | 2289.10 | 64.376  | 2125  | 2 | 1145.05 | -0.64  |
| P0A2F0 RPOE_SALTY RNA polymerase sigma-E factor | 4  | Oxidation+M(9)        | EISNPENLMLSEELR                        | 113  | 15 | 7  | 44.38 | b3b5*b5b8b10*b10y6          | 1789.87 | 50.464  | 15945 | 3 | 597.29  | 0.95   |
| P0A2F0 RPOE_SALTY RNA polymerase sigma-E factor | 5  | Carbamidomethyl+C(11) | SYEEIAAIMDCPVGTVR                      | 154  | 17 | 1  | 7.83  | b14                         | 1910.91 | 102.046 | 1683  | 3 | 637.64  | 4.86   |
| Q7CPE1 ATPA_SALTY ATP synthase subunit alpha    | 1  |                       | MQLNSTEISELIK                          | 0    | 13 | 6  | 27.94 | b2y3y10y11y13*y13           | 1505.79 | 76.871  | 37649 | 2 | 753.40  | 3.89   |
| Q7CPE1 ATPA_SALTY ATP synthase subunit alpha    | 2  |                       | QSVDQPVTGYK                            | 139  | 12 | 6  | 44.65 | b12y7y8y9y11y12             | 1349.67 | 33.828  | 21213 | 2 | 675.34  | 2.71   |
| Q7CPE1 ATPA_SALTY ATP synthase subunit alpha    | 3  |                       | ELAAFSQFASDLDDATR                      | 401  | 17 | 11 | 67.02 | b2b4b8b11y1y4*y4y9y13y14y15 | 1856.88 | 88.897  | 20377 | 2 | 928.94  | 5.85   |
| Q7CPE1 ATPA_SALTY ATP synthase subunit alpha    | 4  |                       | DSVGAVVMGPYADLAEGMK                    | 68   | 19 | 3  | 14.8  | b4b6y14                     | 1909.92 | 83.667  | 39756 | 2 | 955.47  | 10.10  |
| Q7CPE1 ATPA_SALTY ATP synthase subunit alpha    | 5  |                       | ILEVPVGR                               | 93   | 8  | 3  | 40.66 | y4y5y6                      | 882.53  | 52.393  | 35859 | 2 | 441.77  | -6.57  |
| Q7CPE1 ATPA_SALTY ATP synthase subunit alpha    | 6  |                       | QYAPMSVAQQLVFAAER                      | 434  | 19 | 4  | 20.48 | b3b15y6y15                  | 2109.09 | 93.387  | 26233 | 2 | 1055.05 | 4.86   |
| Q7CPE1 ATPA_SALTY ATP synthase subunit alpha    | 7  |                       | GYLADVELAK                             | 453  | 10 | 4  | 26.71 | b4b8y6*y6                   | 1078.56 | 68.552  | 25656 | 2 | 539.79  | -12.11 |
| Q7CPE1 ATPA_SALTY ATP synthase subunit alpha    | 8  |                       | AVDSMIPIGR                             | 151  | 10 | 3  | 26.71 | b4b8y9                      | 1058.57 | 38.782  | 12906 | 2 | 529.79  | 7.61   |
| Q7CPE1 ATPA_SALTY ATP synthase subunit alpha    | 9  |                       | DHAPLMQEINQSGGYNDEIEGK                 | 477  | 22 | 3  | 23.2  | y7y8y11                     | 2445.10 | 100.389 | 9346  | 3 | 815.71  | 1.90   |
| Q7CPE1 ATPA_SALTY ATP synthase subunit alpha    | 10 |                       | VTELLK                                 | 426  | 6  | 1  | 13.55 | y4                          | 702.43  | 40.189  | 7039  | 2 | 351.72  | -9.56  |
| Q7CPE1 ATPA_SALTY ATP synthase subunit alpha    | 11 |                       | EAFPGDVFYLSHR                          | 283  | 13 | 5  | 29.41 | b4*b4b8y8y12                | 1537.75 | 78.143  | 4796  | 2 | 769.38  | 1.19   |
| Q7CPE1 ATPA_SALTY ATP synthase subunit alpha    | 12 | Carbamidomethyl+C(1)  | CIYVAIGQK                              | 192  | 9  | 3  | 38.06 | b5b6b7                      | 1051.54 | 74.158  | 4598  | 2 | 526.27  | -21.59 |
| Q7CPE1 ATPA_SALTY ATP synthase subunit alpha    | 13 |                       | GEDALIYYDLSK                           | 252  | 13 | 3  | 20.46 | b7b10y5                     | 1451.74 | 99.881  | 1801  | 2 | 726.38  | 11.27  |
| Q7CPE1 ATPA_SALTY ATP synthase subunit alpha    | 14 |                       | QLDHGQK                                | 419  | 7  | 5  | 40.25 | b3b6*b6y6*y6                | 825.42  | 62.980  | 1704  | 2 | 413.21  | -6.21  |
| Q7CPE1 ATPA_SALTY ATP synthase subunit alpha    | 15 |                       | VVNTLGAPIDGKGPVDNDGFSAV EAIAPGVIDR     | 106  | 33 | 6  | 24.37 | b27y6*y6y7y10y28            | 3263.70 | 84.243  | 43882 | 3 | 1088.57 | 3.07   |
| Q7CPE1 ATPA_SALTY ATP synthase subunit alpha    | 16 |                       | IGSFEAALLAYVDRDHAPLMQEIN QSGGYNDEIEGK  | 463  | 36 | 4  | 22.5  | b21y11y12*y12               | 3950.88 | 97.013  | 4472  | 3 | 1317.63 | -0.74  |

|                                              |    |                    |                       |     |    |    |        |                                            |         |         |       |   |         |        |
|----------------------------------------------|----|--------------------|-----------------------|-----|----|----|--------|--------------------------------------------|---------|---------|-------|---|---------|--------|
| Q7CPE1 ATPA_SALTY ATP synthase subunit alpha | 17 |                    | GEDALIYYDDL SKQAVAYR  | 252 | 19 | 3  | 23.98  | b8b13b14                                   | 2140.06 | 77.804  | 4301  | 2 | 1070.53 | -13.80 |
| Q7CPE1 ATPA_SALTY ATP synthase subunit alpha | 18 |                    | DSVGAVVMGPYADLAEGMKVK | 68  | 21 | 4  | 13.75  | b6°b6y7y17                                 | 2137.04 | 70.662  | 2379  | 2 | 1069.02 | -12.80 |
| Q7CPE1 ATPA_SALTY ATP synthase subunit alpha | 19 |                    | RPPGREAFPGDV FYLHSR   | 278 | 18 | 5  | 39.85  | b9b10y10y12y13                             | 2101.09 | 79.515  | 2342  | 2 | 1051.05 | 8.83   |
| Q7CPE1 ATPA_SALTY ATP synthase subunit alpha | 20 |                    | AARVNADYVEAFTK        | 300 | 14 | 17 | 107.33 | b5*b5b6*b6b8°b8b9°b9b11y4y5°y5y7°y7y8°y8y9 | 1554.79 | 136.278 | 1962  | 2 | 777.90  | 0.79   |
| Q7CPE1 ATPA_SALTY ATP synthase subunit alpha | 21 | Phosphoryl STY(10) | ELAAFSQFASDLDDATRK    | 401 | 18 | 8  | 39.85  | b5b6°b6b8°b8y6y7°y7                        | 2064.95 | 136.234 | 1677  | 3 | 688.99  | 14.66  |
| P66643 RS9_SALTY 30S ribosomal protein S9    | 1  |                    | SLEQYFGR              | 33  | 8  | 5  | 40.66  | y2y3y4y6y8                                 | 999.48  | 60.629  | 72372 | 2 | 500.25  | -5.86  |
| P66643 RS9_SALTY 30S ribosomal protein S9    | 2  |                    | GGGISGQAGAIR          | 68  | 12 | 6  | 33.98  | b2b3y5y7y8y12                              | 1043.56 | 33.370  | 57413 | 2 | 522.28  | -3.51  |
| P66643 RS9_SALTY 30S ribosomal protein S9    | 3  |                    | AENQYYGTGR            | 1   | 10 | 6  | 33.7   | b2°b2y4y5y8y10                             | 1158.52 | 26.879  | 45229 | 2 | 579.76  | 0.32   |
| P66643 RS9_SALTY 30S ribosomal protein S9    | 4  |                    | IVINQR                | 27  | 6  | 1  | 13.55  | y4                                         | 742.45  | 28.488  | 12900 | 2 | 371.73  | -8.71  |
| P66643 RS9_SALTY 30S ribosomal protein S9    | 5  |                    | AGFVTRDAR             | 100 | 9  | 3  | 30.28  | b4y7y8                                     | 992.53  | 85.452  | 16557 | 2 | 496.77  | -1.91  |
| P66643 RS9_SALTY 30S ribosomal protein S9    | 6  |                    | ALMEYDESLRGELR        | 85  | 14 | 3  | 19.11  | b5b12y11                                   | 1681.84 | 90.034  | 1699  | 3 | 561.28  | 10.31  |
| P66643 RS9_SALTY 30S ribosomal protein S9    | 7  |                    | HGITRALMEYDESLR       | 80  | 15 | 3  | 26.06  | b10b13b14                                  | 1790.88 | 104.538 | 1619  | 2 | 895.95  | -0.55  |
