# Supplementary material for: Phenotypic profile linked to inhibition of the major Zn influx system in Salmonella enterica : proteomics and ionomics investigations
Source: Royal Society of Chemistry journal article supplement (doi:10.1039/c0mb00140f), 2010-10-20
Supplement: c0mb00140f.zip [file c0mb00140f.zip]

## MA6926 LC-MS run 3: 6926\_220709\_1a2\_03

| Protein name                                               | Peptide Rank | Peptide Modification | Sequence                      | Peptide sequence start | Peptide sequence Length | Peptide Matched Products | Peptide Score | By Matches                                                                                              | Precursor MH+ (Da) | Retention time (min) | Intensity | z | Precursor m/z | MH+ Error (ppm) |
|------------------------------------------------------------|--------------|----------------------|-------------------------------|------------------------|-------------------------|--------------------------|---------------|---------------------------------------------------------------------------------------------------------|--------------------|----------------------|-----------|---|---------------|-----------------|
| P0A1R6 DBHA_SALTY DNA-binding protein HU-alpha             | 1            |                      | IAAANVPAFVSGK                 | 70                     | 13                      | 24                       | 181.33        | b2b3b4b5*b5b6*b6y1y2y3y4y5y6y7°y7y8y9y10*y10y11*y11y12*y12y13                                           | 1244.69            | 58.328               | 599331    | 2 | 622.85        | -6.47           |
| P0A1R6 DBHA_SALTY DNA-binding protein HU-alpha             | 2            |                      | AALESTLAAITESLKEGDAVQLVGFGTFK | 22                     | 29                      | 38                       | 334.73        | b2b3b4°b4b6°b6b7°b7b8b9b14b23b24b25b26b27y2y3y4y5y6y7y10y11y12*y12y14y15y19y20y21y22y23y24y25y26y29*y29 | 2966.57            | 114.152              | 566794    | 3 | 989.53        | 0.16            |
| P0A1R6 DBHA_SALTY DNA-binding protein HU-alpha             | 3            |                      | AALESTLAAITESLK               | 22                     | 15                      | 5                        | 25.8          | b2b3b6y5y7                                                                                              | 1517.85            | 96.135               | 56863     | 2 | 759.43        | 1.93            |
| P0A1R6 DBHA_SALTY DNA-binding protein HU-alpha             | 4            |                      | TQLIDVIADK                    | 3                      | 10                      | 5                        | 41.68         | b2y3y6y8y10                                                                                             | 1115.62            | 64.819               | 20545     | 2 | 558.32        | -5.47           |
| P0A1R6 DBHA_SALTY DNA-binding protein HU-alpha             | 5            |                      | EGDAVQLVGFGTFK                | 37                     | 14                      | 5                        | 34.85         | b10°b10b11b12°b12                                                                                       | 1467.74            | 54.601               | 3189      | 2 | 734.37        | -6.99           |
| P0A1R6 DBHA_SALTY DNA-binding protein HU-alpha             | 6            |                      | NPQTGK                        | 61                     | 6                       | 1                        | 13.62         | b5                                                                                                      | 644.34             | 36.657               | 14877     | 1 | 644.34        | 0.66            |
| P0A1R6 DBHA_SALTY DNA-binding protein HU-alpha             | 7            |                      | TQLIDVIADKAELSK               | 3                      | 15                      | 23                       | 200.8         | b3b4b5°b5b6°b6°b6b12y3y4°y4y5°y5y6y7°y7y8y9°y9y10y11y12y13                                              | 1643.90            | 70.718               | 629947    | 3 | 548.64        | -12.99          |
| P0A1R6 DBHA_SALTY DNA-binding protein HU-alpha             | 8            |                      | EGDAVQLVGFGTF                 | 37                     | 13                      | 0                        | 3.64          |                                                                                                         | 1339.65            | 54.613               | 32997     | 2 | 670.33        | -5.29           |
| P0A2H9 DSBA_SALTY Thiol:disulfide interchange protein dsbA | 1            |                      | AAADLQLQGVPAMFVNGK            | 158                    | 18                      | 31                       | 247.11        | b2b5b6°b6°b6b7°b7b8b9b10b12b14b15y2y3*y3y4y5*y5y6y7y8*y8y9*y9y10y11*y11y12y13y18                        | 1829.96            | 79.867               | 182477    | 2 | 915.48        | 1.40            |
| P0A2H9 DSBA_SALTY Thiol:disulfide interchange protein dsbA | 2            |                      | YQINPQGMDTSSMDVVFVQYADTVK     | 176                    | 25                      | 19                       | 90.03         | b2°b2b3b4b6°b6b15b25y2y3y4y5y6°y6y7°y7y9y12y25                                                          | 2865.32            | 85.600               | 104293    | 3 | 955.78        | 4.26            |
| P0A2H9 DSBA_SALTY Thiol:disulfide interchange protein dsbA | 3            |                      | TQTVQSAADIR                   | 116                    | 11                      | 15                       | 98.19         | b2°b2b6b8b11y2y3y5y6y7°y7*y7y8y9y11                                                                     | 1189.61            | 34.089               | 50096     | 2 | 595.31        | -4.21           |
| P0A2H9 DSBA_SALTY Thiol:disulfide interchange protein dsbA | 4            |                      | ELTQAWAVAMALGVEDKVTVPLFEAVQK  | 88                     | 28                      | 6                        | 26.84         | b5°b5°b5b6b13b17                                                                                        | 3043.61            | 115.801              | 3600      | 3 | 1015.21       | -2.41           |
| P0A2H9 DSBA_SALTY Thiol:disulfide interchange protein dsbA | 5            | Oxidation+M(10)      | ELTQAWAVAMALGVEDK             | 88                     | 17                      | 3                        | 23.72         | y3y6y8                                                                                                  | 1847.94            | 77.224               | 2345      | 3 | 616.65        | 11.23           |
| P0A2H9 DSBA_SALTY Thiol:disulfide interchange protein dsbA | 6            |                      | PAMFVNGK                      | 168                    | 8                       | 4                        | 48.14         | b3b4b5b6                                                                                                | 863.43             | 79.877               | 4266      | 1 | 863.43        | -13.64          |
| P0A2H9 DSBA_SALTY Thiol:disulfide interchange protein dsbA | 7            |                      | QYADTVK                       | 194                    | 7                       | 0                        | 8.08          |                                                                                                         | 824.41             | 85.629               | 1984      | 1 | 824.41        | -9.62           |
| P0A1H5 EFTU_SALTY Elongation factor Tu                     | 1            |                      | AIDKPFLLPIDVFSISGR            | 205                    | 19                      | 23                       | 177.15        | b2b4b6b7b8b12b13y1y2y3y4y5y6°y6y7y8°y8y9°y9y11y15y17y19                                                 | 2117.15            | 103.712              | 687115    | 3 | 706.39        | -8.88           |
| P0A1H5 EFTU_SALTY Elongation factor Tu                     | 2            |                      | AGENVGVLLR                    | 270                    | 10                      | 17                       | 129.45        | b2b3b4b5°b5b10y2y3y4y5y6y7°y7y8y9*y9y10                                                                 | 1027.58            | 55.046               | 564970    | 2 | 514.29        | -9.98           |

|                                           |    |                      |                                 |     |    |    |        |                                                                                                                         |         |         |        |   |         |        |
|-------------------------------------------|----|----------------------|---------------------------------|-----|----|----|--------|-------------------------------------------------------------------------------------------------------------------------|---------|---------|--------|---|---------|--------|
| P0A1H5 EFTU_SALTY Elongation factor<br>Tu | 3  |                      | IELAGFLDSYIPEPER                | 188 | 17 | 30 | 284.91 | b2b3b4b5b6b7b8b9b12°b12b14y1y3°y3y4y5°y5y6y7y8°y8y9y10y11y12y13y14°y14y15y17                                            | 1962.03 | 101.086 | 472059 | 2 | 981.52  | 6.22   |
| P0A1H5 EFTU_SALTY Elongation factor<br>Tu | 4  |                      | TTLTAAITTVLAK                   | 25  | 13 | 24 | 168.11 | b1°b1b2°b2b3°b3b4°b4b5°b5b6°b6b13y2y3y4y5y6y7y8y9y10y11y13                                                              | 1303.78 | 83.538  | 424505 | 2 | 652.40  | 0.37   |
| P0A1H5 EFTU_SALTY Elongation factor<br>Tu | 5  |                      | ELLSQYDFPGDDTPIVR               | 155 | 17 | 34 | 264.7  | b2°b2b5°b5b6°b6b7°b7b8°b8°b8b9b12b13b16y1y3y4y5y6y7y8y9°y9y10°y10y11y12y13y14°y14*y14y15y17                             | 1964.97 | 75.817  | 423214 | 2 | 982.99  | 6.15   |
| P0A1H5 EFTU_SALTY Elongation factor<br>Tu | 6  |                      | QVGVPIIVFLNK                    | 124 | 13 | 10 | 76.53  | b3°b3b4b13y4y5y6y9y11y13                                                                                                | 1489.88 | 98.171  | 345893 | 2 | 745.44  | -1.15  |
| P0A1H5 EFTU_SALTY Elongation factor<br>Tu | 7  |                      | TTDVTGTIELPEGVEMVMPGDNI<br>K    | 334 | 24 | 44 | 318.95 | b1°b1b2°b2b3°b3b4b5°b5b6b7b8°b8b9°b9b10°b10b11b15b16b17°b17b18y2y3y4y6°y6*y6y7°y7*y7y8y9°y9y10y11y12y13y14°y14y15y16y24 | 2546.27 | 85.853  | 259819 | 2 | 1273.64 | 11.41  |
| P0A1H5 EFTU_SALTY Elongation factor<br>Tu | 8  |                      | VGEEVEIVGIK                     | 238 | 11 | 11 | 111.41 | b2b3b5y3y4y5y7y8y9y10y11                                                                                                | 1171.65 | 58.991  | 134140 | 2 | 586.33  | -5.00  |
| P0A1H5 EFTU_SALTY Elongation factor<br>Tu | 9  | Carbamidomethyl+C(1) | CDMVDDEELLELVEMEV               | 137 | 18 | 21 | 160.01 | b2b3b4b5b8y2y3°y3y4y5°y5y6°y6y7y8°y8y11y12y13y14y18                                                                     | 2224.01 | 105.298 | 121572 | 2 | 1112.51 | 11.42  |
| P0A1H5 EFTU_SALTY Elongation factor<br>Tu | 10 | Carbamidomethyl+C(3) | STCTGVEMFR                      | 253 | 10 | 8  | 68.12  | b2°b2y2y3y4y6y7y8                                                                                                       | 1187.52 | 51.475  | 120119 | 2 | 594.26  | -0.82  |
| P0A1H5 EFTU_SALTY Elongation factor<br>Tu | 11 |                      | ALEGDAEWEAK                     | 177 | 11 | 7  | 47.53  | b2y4y5°y5y6y9y11                                                                                                        | 1218.57 | 44.731  | 66537  | 2 | 609.79  | 2.00   |
| P0A1H5 EFTU_SALTY Elongation factor<br>Tu | 12 | Carbamidomethyl+C(7) | HYAHVDCPGHADYVK                 | 75  | 15 | 4  | 26.22  | y4y7°y7y8                                                                                                               | 1768.77 | 34.433  | 7143   | 3 | 590.26  | -6.35  |
| P0A1H5 EFTU_SALTY Elongation factor<br>Tu | 13 |                      | NMITGAAQMDGAILVVAATDGP<br>MPQTR | 90  | 27 | 4  | 22.55  | b8b9b13y8                                                                                                               | 2729.33 | 126.083 | 2882   | 3 | 910.45  | -3.85  |
| P0A1H5 EFTU_SALTY Elongation factor<br>Tu | 14 |                      | MVVTLIHPIAMDDGLR                | 358 | 16 | 21 | 208.98 | b3b5°b5b6b7°b7b13y3y4y5y6y7y8y9°y9y10°y10y11y12y13y15                                                                   | 1780.92 | 77.952  | 778687 | 3 | 594.31  | -15.83 |
| P0A1H5 EFTU_SALTY Elongation factor<br>Tu | 15 |                      | GITINTSHVEYDTPTR                | 59  | 16 | 27 | 208.98 | b3°b3b4°b4b9b10b12°b12y3y4°y4y5y6y7y8y9°y9y10°y10y11°y11y12°y12y13°y13y14°y14                                           | 1803.86 | 48.274  | 407746 | 3 | 601.96  | -15.83 |
| P0A1H5 EFTU_SALTY Elongation factor<br>Tu | 16 |                      | TVGAGVVAK                       | 382 | 9  | 8  | 79.18  | b3°b3b6°b6y3y5y7y8                                                                                                      | 801.47  | 27.443  | 167900 | 2 | 401.24  | -21.25 |
| P0A1H5 EFTU_SALTY Elongation factor<br>Tu | 17 |                      | EHILLGR                         | 117 | 7  | 5  | 50.68  | b3°b3y3y4y5                                                                                                             | 837.48  | 39.481  | 96575  | 2 | 419.24  | -18.58 |
| P0A1H5 EFTU_SALTY Elongation factor<br>Tu | 18 |                      | GYRPQFYFR                       | 325 | 9  | 5  | 59.94  | b3b4b5y4y6                                                                                                              | 1233.59 | 58.404  | 64849  | 3 | 411.87  | -17.81 |
| P0A1H5 EFTU_SALTY Elongation factor<br>Tu | 19 |                      | LLDEGR                          | 264 | 6  | 2  | 26.85  | y4y5                                                                                                                    | 702.37  | 25.861  | 20838  | 1 | 702.37  | -9.21  |
| P0A1H5 EFTU_SALTY Elongation factor<br>Tu | 20 |                      | TKPHVNVGTIGHVDHGK               | 8   | 17 | 6  | 26.15  | b4°b4y3y5y7°y7                                                                                                          | 1795.92 | 36.555  | 12078  | 4 | 449.74  | -18.15 |
| P0A1H5 EFTU_SALTY Elongation factor<br>Tu | 21 |                      | GIIK                            | 234 | 4  | 1  | 12.82  | b3                                                                                                                      | 430.30  | 43.602  | 4805   | 1 | 430.30  | 3.05   |
| P0A1H5 EFTU_SALTY Elongation factor<br>Tu | 22 |                      | HTPFFK                          | 319 | 6  | 1  | 13.62  | b4                                                                                                                      | 776.40  | 42.959  | 3298   | 2 | 388.71  | -7.70  |

|                                                            |    |                       |                                 |     |    |    |        |                                                                                                                                |         |         |        |   |         |        |
|------------------------------------------------------------|----|-----------------------|---------------------------------|-----|----|----|--------|--------------------------------------------------------------------------------------------------------------------------------|---------|---------|--------|---|---------|--------|
| P0A1H5 EFTU_SALTY Elongation factor Tu                     | 23 | Carbamidomethyl+C(14) | QVGVPYIIVFLNKCDMVDDEELLE LVEMEV | 124 | 31 | 4  | 22.04  | b3y5°y5y6                                                                                                                      | 3694.86 | 126.857 | 16632  | 3 | 1232.29 | 3.83   |
| P0A1H5 EFTU_SALTY Elongation factor Tu                     | 24 |                       | HTPFFKGYRPQFYFR                 | 319 | 15 | 4  | 18.14  | b3°b3b10y3                                                                                                                     | 1991.01 | 59.935  | 5328   | 3 | 664.34  | 1.53   |
| P0A1H5 EFTU_SALTY Elongation factor Tu                     | 25 |                       | ARGITINTSHVEYDTPTR              | 57  | 18 | 6  | 44.33  | y5°y5y8y9y12y14                                                                                                                | 2031.01 | 93.047  | 2898   | 2 | 1016.01 | -6.43  |
| P0A1H5 EFTU_SALTY Elongation factor Tu                     | 26 |                       | ALEGDAEWEAKIIELAGFLDSYIPE PER   | 177 | 28 | 5  | 20.52  | b3b5b7y10y13                                                                                                                   | 3161.56 | 120.862 | 1929   | 4 | 791.15  | -1.54  |
| P0A1H5 EFTU_SALTY Elongation factor Tu                     | 27 | Phosphoryl STY(9)     | FESEVYILSK                      | 304 | 10 | 4  | 42.86  | b6b7y3y4                                                                                                                       | 1294.61 | 74.400  | 10112  | 2 | 647.81  | 14.33  |
| P0A1H5 EFTU_SALTY Elongation factor Tu                     | 28 | Oxidation+M(1)        | MVVTLIHPIAMDDGLR                | 358 | 16 | 4  | 35.08  | y3y7y9y10                                                                                                                      | 1796.92 | 72.589  | 27837  | 3 | 599.65  | -9.65  |
| P0A1H5 EFTU_SALTY Elongation factor Tu                     | 29 | Oxidation+M()         | TTDVTGTIELPEGVEMVMPGDNI K       | 334 | 24 | 3  | 12.71  | b6b8y11                                                                                                                        | 2562.24 | 77.244  | 3092   | 3 | 854.75  | 3.43   |
| P0A1H5 EFTU_SALTY Elongation factor Tu                     | 30 |                       | ENVGVLLR                        | 272 | 8  | 0  | 2.02   |                                                                                                                                | 899.53  | 55.086  | 3181   | 2 | 450.27  | -3.66  |
| P0A1H5 EFTU_SALTY Elongation factor Tu                     | 31 |                       | PIEDVFSISGR                     | 213 | 11 | 2  | 7.42   | b6°b6                                                                                                                          | 1219.62 | 103.705 | 2684   | 2 | 610.32  | -6.71  |
| P0A1H5 EFTU_SALTY Elongation factor Tu                     | 32 |                       | IIELAGFLDSYIPEPE                | 188 | 16 | 0  | 4.85   |                                                                                                                                | 1805.93 | 101.036 | 2243   | 2 | 903.47  | 6.35   |
| P0A1H5 EFTU_SALTY Elongation factor Tu                     | 33 |                       | QVGVPYIIVFLNK                   | 124 | 13 | 2  | 7.42   | b6*b6                                                                                                                          | 1472.84 | 98.156  | 1802   | 3 | 491.62  | -4.31  |
| P0A1S2 HNS_SALTY DNA-binding protein H-NS                  | 1  |                       | EMLIADGIDPNELLNSMAAAK           | 62  | 21 | 43 | 324.63 | b2°b2b3°b3b4°b4b5°b5b6b7°b7b8°b8b9b10b12°b12b13b14°b14b18b21y1y2y3y4y6y7*y7y8y9y10y12*y12y13y14y15°y15y16°y16y17y18y21         | 2216.11 | 96.042  | 472643 | 2 | 1108.56 | 7.82   |
| P0A1S2 HNS_SALTY DNA-binding protein H-NS                  | 2  |                       | YSYVDENGETK                     | 96  | 11 | 12 | 100.41 | b2b9y2y4y5y6y7y8y9*y9y10y11                                                                                                    | 1304.56 | 31.741  | 101886 | 2 | 652.78  | -2.06  |
| P0A1S2 HNS_SALTY DNA-binding protein H-NS                  | 3  |                       | REEESAAAAVEER                   | 40  | 14 | 14 | 91.83  | b2b4b7°b7b10b12b13y2y4y5°y5y7y10y14                                                                                            | 1575.73 | 30.789  | 52753  | 2 | 788.37  | 5.50   |
| P0A1S2 HNS_SALTY DNA-binding protein H-NS                  | 4  |                       | TWTGQGR                         | 107 | 7  | 6  | 69.92  | b4b5b6y3*y3y6                                                                                                                  | 805.39  | 46.460  | 16738  | 1 | 805.39  | -9.40  |
| P0A1S2 HNS_SALTY DNA-binding protein H-NS                  | 5  |                       | ILNNIR                          | 6   | 6  | 2  | 26.85  | b4y5                                                                                                                           | 742.45  | 27.399  | 4919   | 2 | 371.73  | -13.56 |
| P0A1S2 HNS_SALTY DNA-binding protein H-NS                  | 6  |                       | SEALK                           | 1   | 5  | 3  | 26.44  | b3b4°b4                                                                                                                        | 547.30  | 42.294  | 3971   | 1 | 547.30  | -11.71 |
| P0A1S2 HNS_SALTY DNA-binding protein H-NS                  | 7  | Carbamidomethyl+C(2)  | ECTLETLEEMLEKLEVVNER            | 19  | 21 | 16 | 153.56 | b3b6y3y4y5y6y7*y7y8y13°y13y15y16y17y18y19                                                                                      | 2563.26 | 123.406 | 152733 | 3 | 855.09  | -0.67  |
| P0A1S2 HNS_SALTY DNA-binding protein H-NS                  | 8  |                       | YSYVDENGETKTWTGQGR              | 96  | 18 | 13 | 125.74 | b8y4y5y6y8*y8y11y12*y12y14y15y16y17                                                                                            | 2090.93 | 45.523  | 75935  | 3 | 697.65  | -5.49  |
| P0A1S2 HNS_SALTY DNA-binding protein H-NS                  | 9  |                       | EMLIADGIDPNELLNSMAAAKSGT K      | 62  | 25 | 3  | 18.63  | b4b11b15                                                                                                                       | 2589.32 | 81.956  | 49639  | 3 | 863.78  | 9.90   |
| P0A1S2 HNS_SALTY DNA-binding protein H-NS                  | 10 | Carbamidomethyl+C(6)  | AQARECTLETLEEMLEK               | 15  | 17 | 3  | 23.31  | b4b5y6                                                                                                                         | 2050.95 | 62.226  | 1659   | 2 | 1025.98 | -14.76 |
| P0A1S2 HNS_SALTY DNA-binding protein H-NS                  | 11 | Oxidation+M(2)        | EMLIADGIDPNELLNSMAAAK           | 62  | 21 | 4  | 20.52  | y7y13°y13y16                                                                                                                   | 2232.11 | 90.660  | 15238  | 2 | 1116.56 | 10.83  |
| P0A1P0 G3P1_SALTY Glyceraldehyde-3-phosphate dehydrogenase | 1  |                       | VINDNFGIIEGLMTTVHATTATQK        | 160 | 24 | 46 | 329.48 | b2b3b4°b4°b4b5°b5°b5b6°b6°b6b7°b7b8°b8b10y1y2*y2y3y4y5y6°y6y7*y7y8°y8y9y10y11y14y15°y15y16°y16y17y18y19y20y21y22°y22y23y24*y24 | 2574.32 | 97.117  | 488491 | 3 | 858.78  | -1.80  |

|                                                           |    |                                                      |                                   |     |    |    |        |                                                                                                                              |         |         |        |   |         |        |
|-----------------------------------------------------------|----|------------------------------------------------------|-----------------------------------|-----|----|----|--------|------------------------------------------------------------------------------------------------------------------------------|---------|---------|--------|---|---------|--------|
| [P0A1P0]G3P1_SALTY Glyceraldehyde-3-phohate dehydrogenase | 2  |                                                      | LVSWYDNETGYSNK                    | 307 | 14 | 20 | 187.17 | b2b3b6b7°b7b11b12y3*y3y4*y4y5y6y7y8y9y10y11y12y14                                                                            | 1675.77 | 56.973  | 313475 | 2 | 838.39  | 8.16   |
| [P0A1P0]G3P1_SALTY Glyceraldehyde-3-phohate dehydrogenase | 3  |                                                      | AGIALNDNFVK                       | 296 | 11 | 11 | 84.97  | b3b4y2y3y4*y4y6y7*y7y8y11                                                                                                    | 1161.62 | 60.199  | 248285 | 2 | 581.31  | -6.52  |
| [P0A1P0]G3P1_SALTY Glyceraldehyde-3-phohate dehydrogenase | 4  |                                                      | GASQNIIPSSTGAAK                   | 198 | 15 | 22 | 141.68 | b3b5°b5°b5b6°b6°b6b7°b7°b7b15y4y5°y5y6y7y8°y8y9y10y11y15                                                                     | 1401.73 | 39.699  | 224393 | 2 | 701.37  | -2.35  |
| [P0A1P0]G3P1_SALTY Glyceraldehyde-3-phohate dehydrogenase | 5  |                                                      | VPTPNVSVVDLTVR                    | 232 | 14 | 11 | 135.84 | y3y4y5y6y7y8y9y10y11y12y14                                                                                                   | 1495.85 | 69.939  | 195894 | 2 | 748.43  | 2.04   |
| [P0A1P0]G3P1_SALTY Glyceraldehyde-3-phohate dehydrogenase | 6  |                                                      | VLDLIAHISK                        | 321 | 10 | 6  | 74.35  | b3y3y4y5y6y8                                                                                                                 | 1108.67 | 63.997  | 137696 | 2 | 554.84  | -6.17  |
| [P0A1P0]G3P1_SALTY Glyceraldehyde-3-phohate dehydrogenase | 7  |                                                      | AATYEQIK                          | 249 | 8  | 9  | 67.31  | b1b5b7b8y4*y4y5y6*y6                                                                                                         | 923.47  | 29.754  | 108219 | 2 | 462.24  | -11.90 |
| [P0A1P0]G3P1_SALTY Glyceraldehyde-3-phohate dehydrogenase | 8  |                                                      | VLPELNGK                          | 217 | 8  | 12 | 54.09  | b1b2y2y3y4*y4y5*y5y6°y6°y6y8                                                                                                 | 869.50  | 43.554  | 80766  | 2 | 435.25  | -10.11 |
| [P0A1P0]G3P1_SALTY Glyceraldehyde-3-phohate dehydrogenase | 9  |                                                      | SDIEIVAINDLLDAEYMAYMLK            | 24  | 22 | 25 | 208.19 | b2b3b4b5°b5b6b7°b7b13b14y1y2y3y4y5y6y7y8y9°y9y10y11y12y14y22                                                                 | 2530.24 | 125.448 | 69514  | 3 | 844.08  | -3.38  |
| [P0A1P0]G3P1_SALTY Glyceraldehyde-3-phohate dehydrogenase | 10 |                                                      | TVDGPSHKDWR                       | 184 | 11 | 8  | 55.52  | b1b8b9y2y4y5y6y11                                                                                                            | 1297.61 | 26.552  | 36839  | 3 | 433.21  | -10.63 |
| [P0A1P0]G3P1_SALTY Glyceraldehyde-3-phohate dehydrogenase | 11 |                                                      | VTAERDPANLK                       | 73  | 11 | 6  | 52.51  | b6b9y3y5y7y11                                                                                                                | 1213.64 | 27.202  | 19730  | 2 | 607.33  | -7.64  |
| [P0A1P0]G3P1_SALTY Glyceraldehyde-3-phohate dehydrogenase | 12 |                                                      | VGINGFGR                          | 4   | 8  | 4  | 33.09  | b5y5*y5y6                                                                                                                    | 819.44  | 40.696  | 23965  | 2 | 410.23  | -5.29  |
| [P0A1P0]G3P1_SALTY Glyceraldehyde-3-phohate dehydrogenase | 13 |                                                      | GANFDK                            | 132 | 6  | 1  | 13.62  | y4                                                                                                                           | 651.32  | 42.577  | 5344   | 1 | 651.32  | 8.62   |
| [P0A1P0]G3P1_SALTY Glyceraldehyde-3-phohate dehydrogenase | 14 |                                                      | WDEVGVDDVVAEATGIFLTDETAR          | 84  | 23 | 9  | 42.94  | b14°b14b15°b15y6°y6y7y14y22                                                                                                  | 2493.19 | 68.147  | 2281   | 4 | 624.05  | -11.46 |
| [P0A1P0]G3P1_SALTY Glyceraldehyde-3-phohate dehydrogenase | 15 |                                                      | TVDGPSHK                          | 184 | 8  | 4  | 49.32  | b4b6b7y3                                                                                                                     | 840.41  | 106.992 | 1591   | 1 | 840.41  | -11.55 |
| [P0A1P0]G3P1_SALTY Glyceraldehyde-3-phohate dehydrogenase | 16 | Carbamidomethyl+C(18)<br>;Carbamidomethyl+C(22)<br>) | GANFDKYEQQDIVSNASCCTTNCL<br>APLAK | 132 | 28 | 42 | 335.25 | b3b4b5°b5b6b7°b7°b7b8b10°b10b11°b11°b11b12°b12°b12b13b15b16b22b24°b24b26b27y3y4y5y6y8y9y10y11°y11°y11y12*y12y13y14y15*y15y16 | 3044.42 | 65.567  | 383551 | 3 | 1015.48 | 4.57   |
| [P0A1P0]G3P1_SALTY Glyceraldehyde-3-phohate dehydrogenase | 17 |                                                      | AGIALNDNFVKLVSWYDNETGYS<br>NK     | 296 | 25 | 8  | 27     | b4b10°b10°b10y4y5*y5y7                                                                                                       | 2818.40 | 99.348  | 12013  | 3 | 940.14  | 12.30  |
| [P0A1P0]G3P1_SALTY Glyceraldehyde-3-phohate dehydrogenase | 18 |                                                      | KHITAGAK                          | 107 | 8  | 7  | 93.76  | b4b6y3y4y5y6y7                                                                                                               | 825.49  | 12.712  | 9142   | 2 | 413.25  | -8.87  |
| [P0A1P0]G3P1_SALTY Glyceraldehyde-3-phohate dehydrogenase | 19 |                                                      | VLPELNGKLTGMAFR                   | 217 | 15 | 3  | 26.22  | y6y7y12                                                                                                                      | 1645.89 | 71.868  | 7157   | 3 | 549.30  | -11.57 |

|                                                          |    |                      |                                       |     |    |    |        |                                                                               |         |         |        |   |         |        |
|----------------------------------------------------------|----|----------------------|---------------------------------------|-----|----|----|--------|-------------------------------------------------------------------------------|---------|---------|--------|---|---------|--------|
| P0A1P0 G3P1_SALTY Glyceraldehyde-3-phohate dehydrogenase | 20 |                      | GGRGASQNIIPSSTGAAK                    | 195 | 18 | 3  | 15.58  | b11y4y8                                                                       | 1671.87 | 43.701  | 2564   | 2 | 836.44  | -5.55  |
| P0A1P0 G3P1_SALTY Glyceraldehyde-3-phohate dehydrogenase | 21 |                      | VINDNFGIIEGLMTTVHATTATQK<br>TVDGPSHK  | 160 | 32 | 4  | 11.14  | b6b8y3°y3                                                                     | 3395.70 | 118.829 | 2541   | 3 | 1132.57 | -8.63  |
| P0A1P0 G3P1_SALTY Glyceraldehyde-3-phohate dehydrogenase | 22 | Oxidation+M(4)       | LTGMAFR                               | 225 | 7  | 3  | 40.47  | y3y4y5                                                                        | 811.41  | 49.012  | 1740   | 2 | 406.21  | -3.46  |
| P0A1P0 G3P1_SALTY Glyceraldehyde-3-phohate dehydrogenase | 23 |                      | LDLIAHISK                             | 322 | 9  | 1  | 8.25   | b3                                                                            | 1009.60 | 63.994  | 46646  | 2 | 505.30  | -5.80  |
| P0A1P0 G3P1_SALTY Glyceraldehyde-3-phohate dehydrogenase | 24 |                      | DLIAHISK                              | 323 | 8  | 2  | 20.68  | b3b5                                                                          | 896.51  | 63.991  | 45617  | 2 | 448.76  | -10.42 |
| P0A1P0 G3P1_SALTY Glyceraldehyde-3-phohate dehydrogenase | 25 |                      | DGPSHKDWR                             | 186 | 9  | 1  | 7.86   | b7                                                                            | 1097.51 | 26.621  | 8770   | 2 | 549.26  | -6.01  |
| P0A1P0 G3P1_SALTY Glyceraldehyde-3-phohate dehydrogenase | 26 |                      | AERDPANLK                             | 75  | 9  | 0  | 2.43   |                                                                               | 1013.53 | 27.226  | 3488   | 2 | 507.27  | -9.70  |
| P0A1P0 G3P1_SALTY Glyceraldehyde-3-phohate dehydrogenase | 27 |                      | TAERDPANLK                            | 74  | 10 | 1  | 7.86   | b8                                                                            | 1114.58 | 27.202  | 2740   | 2 | 557.79  | -3.72  |
| P25077 MDH_SALTY Malate dehydrogenase                    | 1  |                      | NQLPSGSELSLYDIAPVTPGVAVD<br>LSHIPTAVK | 21  | 33 | 29 | 138.61 | b1b2*b2b3*b3b4b6b7*b7b8°b8b12*b12b13b15*b15y1y2y3y5°y5y6y15y16y18y19y30y31y33 | 3388.81 | 93.114  | 214959 | 3 | 1130.28 | 3.60   |
| P25077 MDH_SALTY Malate dehydrogenase                    | 2  |                      | FFSQPLLLGK                            | 262 | 10 | 8  | 68.12  | b2y2y3y4y5y6y8y10                                                             | 1149.66 | 74.796  | 187510 | 2 | 575.33  | -6.16  |
| P25077 MDH_SALTY Malate dehydrogenase                    | 3  |                      | VAVLGAAGGIGQALALLK                    | 2   | 19 | 30 | 328.39 | b2b3b4b5b6b7b8b9b10b11b15b16b17b18b19y1y2y3y4y5y6y7y9y10y11y12y13y15y16y19    | 1735.08 | 119.192 | 183471 | 2 | 868.05  | -0.42  |
| P25077 MDH_SALTY Malate dehydrogenase                    | 4  |                      | IQNAGTEVVEAK                          | 205 | 12 | 27 | 187.92 | b2*b2b3*b3b4b6*b6b8*b8b9b10b11y1y2y3°y3y4y5y6y8°y8y9y10°y10*y10y12*y12        | 1258.66 | 33.507  | 173200 | 2 | 629.83  | -2.81  |
| P25077 MDH_SALTY Malate dehydrogenase                    | 5  | Carbamidomethyl+C(2) | ACVGIITNPVNTTVAIAAEVLKK               | 111 | 23 | 18 | 130.98 | b2b3b4b5b6b9°b9y2y4y5y6y8y15y16y18y20y21y23                                   | 2382.34 | 103.885 | 164626 | 3 | 794.78  | -2.77  |
| P25077 MDH_SALTY Malate dehydrogenase                    | 6  |                      | DIQLGEDFINK                           | 301 | 11 | 7  | 27.32  | b2b3b11y2y7y8y11                                                              | 1291.65 | 66.742  | 101074 | 2 | 646.33  | 0.85   |
| P25077 MDH_SALTY Malate dehydrogenase                    | 7  |                      | LFGVTTLDIIR                           | 142 | 11 | 5  | 24.31  | b2b3y1y3y9                                                                    | 1247.73 | 88.150  | 81702  | 2 | 624.37  | -4.50  |
| P25077 MDH_SALTY Malate dehydrogenase                    | 8  |                      | AGGGSATLSMGQAAAR                      | 217 | 16 | 27 | 181.96 | b1b3b5b6°b6b7°b7b8°b8b11b12b13b16y6*y6y7*y7y8*y8y9*y9y10°y10*y10y11y12y16     | 1405.69 | 38.818  | 71520  | 2 | 703.35  | 2.00   |
| P25077 MDH_SALTY Malate dehydrogenase                    | 9  |                      | SDLFNVNAGIVK                          | 87  | 12 | 10 | 75.83  | b2b3b10y2y4y6y7y8y9y12                                                        | 1276.69 | 68.597  | 65502  | 2 | 638.85  | -0.38  |
| P25077 MDH_SALTY Malate dehydrogenase                    | 10 |                      | GFSGEDATPALEGADVVLISAGVAR             | 56  | 25 | 5  | 23.1   | b3y4y6°y6y7                                                                   | 2402.23 | 90.115  | 16878  | 2 | 1201.62 | 5.79   |
| P25077 MDH_SALTY Malate dehydrogenase                    | 11 |                      | FGLSLVR                               | 233 | 7  | 4  | 53.69  | y3y4y5y6                                                                      | 791.46  | 65.599  | 97669  | 2 | 396.24  | -15.96 |
| P25077 MDH_SALTY Malate dehydrogenase                    | 12 |                      | NGVEER                                | 272 | 6  | 2  | 29.86  | y3y5                                                                          | 703.34  | 30.601  | 14156  | 1 | 703.34  | 8.33   |

|                                       |    |                      |                                                |     |    |    |        |                                                                                                 |         |         |        |   |         |        |
|---------------------------------------|----|----------------------|------------------------------------------------|-----|----|----|--------|-------------------------------------------------------------------------------------------------|---------|---------|--------|---|---------|--------|
| P25077 MDH_SALTY Malate dehydrogenase | 13 |                      | SIGTLSAFEQHSLDAMLDTLK                          | 279 | 21 | 3  | 13.88  | b8b12y11                                                                                        | 2277.17 | 81.548  | 9399   | 3 | 759.73  | 10.61  |
| P25077 MDH_SALTY Malate dehydrogenase | 14 | Carbamidomethyl+C(2) | ACVGIITNPVNTTV AIAAEVLK                        | 111 | 22 | 4  | 18.17  | b4b6y6y16                                                                                       | 2254.23 | 112.639 | 8816   | 3 | 752.08  | -6.50  |
| P25077 MDH_SALTY Malate dehydrogenase | 15 |                      | ALQGEK                                         | 240 | 6  | 1  | 13.62  | y3                                                                                              | 645.37  | 44.631  | 6404   | 1 | 645.37  | 13.62  |
| P25077 MDH_SALTY Malate dehydrogenase | 16 |                      | GKLPTEVEVPVIGGHSGVTILPLLS<br>QIPGVSFTEQEAAELTK | 162 | 42 | 8  | 23.74  | b3b27y9°y9y10y12°y12y15                                                                         | 4341.36 | 112.242 | 34336  | 4 | 1086.09 | -0.79  |
| P25077 MDH_SALTY Malate dehydrogenase | 17 |                      | IKGFSGEDATPALEGADVVLISAG<br>VAR                | 54  | 27 | 5  | 21.2   | b9b11b14y4y6                                                                                    | 2643.41 | 86.778  | 32586  | 3 | 881.81  | 4.99   |
| P25077 MDH_SALTY Malate dehydrogenase | 18 |                      | IQNAGTEVVVEAKAGGGSATLSMG<br>QAAAR              | 205 | 28 | 3  | 17.72  | b3b7b13                                                                                         | 2645.32 | 95.086  | 7716   | 3 | 882.45  | -2.95  |
| P25077 MDH_SALTY Malate dehydrogenase | 19 | Carbamidomethyl+C(2) | ACVGIITNPVNTTV AIAAEVLKK                       | 111 | 23 | 3  | 19.46  | b3b6b13                                                                                         | 2382.31 | 76.622  | 4457   | 3 | 794.78  | -12.09 |
| P25077 MDH_SALTY Malate dehydrogenase | 20 |                      | FFSQPLLLGKNGVEER                               | 262 | 16 | 4  | 17.16  | b4y3y8°y8                                                                                       | 1834.00 | 107.525 | 3105   | 3 | 612.00  | 6.32   |
| P25077 MDH_SALTY Malate dehydrogenase | 21 | Oxidation+M(16)      | SIGTLSAFEQHSLDAMLDTLK                          | 279 | 21 | 3  | 20.52  | b9b11b15                                                                                        | 2293.15 | 76.254  | 6353   | 3 | 765.06  | 6.28   |
| P25077 MDH_SALTY Malate dehydrogenase | 22 | Oxidation+M(10)      | AGGGSATLSMGQAAAR                               | 217 | 16 | 4  | 24.26  | b5b13y5y14                                                                                      | 1421.66 | 39.763  | 3393   | 2 | 711.34  | -11.76 |
| P06179 FLIC_SALTY Flagellin           | 1  |                      | AQILQQAGTSVLAQANQVPQNVLSLLR                    | 468 | 27 | 35 | 237.44 | b2*b2b3*b3b4b5*b5b6b7*b7b8b11°b11b12b13b14*b14b15°b15b18*b18y1y2y3y4y5y6y7y9y10y12*y12y13y14y27 | 2860.60 | 104.587 | 111231 | 3 | 954.20  | -0.09  |
| P06179 FLIC_SALTY Flagellin           | 2  |                      | AQVINTNSLSLLTQNNLNK                            | 1   | 19 | 14 | 63.72  | b2*b2b4b6y1y2y3y4*y4y7y8y10y15y19                                                               | 2085.15 | 73.796  | 81074  | 2 | 1043.08 | 7.73   |
| P06179 FLIC_SALTY Flagellin           | 3  |                      | FNSAITNLGNTVNNLTSAR                            | 432 | 19 | 23 | 140.5  | b2b3*b3b4°b4b5*b5b8b9b14y2y3y4y5y6y7°y7*y11y13*y13y14y15y19                                     | 2007.04 | 77.369  | 69287  | 2 | 1004.02 | 6.51   |
| P06179 FLIC_SALTY Flagellin           | 4  |                      | NANDGISIAQTTEGALNEINNQLQR                      | 66  | 25 | 14 | 70.86  | b2b6°b6b8b13b14b15b16y2*y2y3y4y13y25                                                            | 2670.34 | 85.772  | 63265  | 2 | 1335.67 | 10.24  |
| P06179 FLIC_SALTY Flagellin           | 5  |                      | SQSALGTAIER                                    | 20  | 11 | 11 | 63.97  | b2°b2*b2b3b8y1y5y6y7y9y11                                                                       | 1132.59 | 40.765  | 62201  | 2 | 566.80  | -3.34  |
| P06179 FLIC_SALTY Flagellin           | 6  |                      | IDAALAQVDTLR                                   | 411 | 12 | 14 | 127.25 | b2b3b4y3y4y6y7°y7*y7y8y9y10y11y12                                                               | 1285.71 | 59.973  | 53609  | 2 | 643.36  | -2.85  |
| P06179 FLIC_SALTY Flagellin           | 7  |                      | VSGQTQFNGVK                                    | 125 | 11 | 6  | 38.32  | b9b10y5y9°y9y11                                                                                 | 1164.60 | 32.129  | 52799  | 2 | 582.80  | -4.51  |
| P06179 FLIC_SALTY Flagellin           | 8  |                      | INSAKDDAAGQAIANR                               | 37  | 16 | 17 | 89.12  | b2*b2b6°b6b9°b9*b9y4y5*y5y7*y7y9y10y11*y11y12                                                   | 1614.80 | 29.196  | 49410  | 3 | 538.94  | -9.98  |
| P06179 FLIC_SALTY Flagellin           | 9  |                      | QINSQTLGLDTLNVQQK                              | 161 | 17 | 5  | 34.51  | b17y10y11y12y17                                                                                 | 1900.03 | 64.172  | 44996  | 2 | 950.52  | 8.03   |
| P06179 FLIC_SALTY Flagellin           | 10 |                      | SDLGAVQNR                                      | 423 | 9  | 10 | 61.7   | b2b5°b5y1y4y5y6*y6y7y9                                                                          | 959.48  | 26.697  | 38352  | 2 | 480.25  | -7.38  |
| P06179 FLIC_SALTY Flagellin           | 11 |                      | DDAAGQAIANR                                    | 42  | 11 | 3  | 24.31  | b3b7y7                                                                                          | 1101.52 | 27.062  | 14037  | 2 | 551.26  | -5.32  |
| P06179 FLIC_SALTY Flagellin           | 12 |                      | ELAVQSANSTNSQSDLDLSIQAEITQR                    | 93  | 26 | 12 | 41.8   | b2°b2b3b12b13b16y2*y2y7y12*y12y13                                                               | 2805.36 | 57.789  | 13136  | 4 | 702.10  | 4.96   |
| P06179 FLIC_SALTY Flagellin           | 13 |                      | AQPDLAEEAAATTENPLQK                            | 392 | 19 | 6  | 23.66  | b4°b4b6°b6b17y8                                                                                 | 1969.01 | 59.395  | 9522   | 2 | 985.01  | 13.89  |
| P06179 FLIC_SALTY Flagellin           | 14 |                      | AEGHNFK                                        | 385 | 7  | 4  | 37.46  | b4y5y6*y6                                                                                       | 802.40  | 83.978  | 7998   | 1 | 802.40  | 16.58  |
| P06179 FLIC_SALTY Flagellin           | 15 |                      | TYAASK                                         | 379 | 6  | 2  | 26.85  | b4b5                                                                                            | 640.33  | 48.997  | 4557   | 1 | 640.33  | -4.19  |
| P06179 FLIC_SALTY Flagellin           | 16 |                      | LNEIDR                                         | 119 | 6  | 1  | 13.62  | y4                                                                                              | 759.39  | 27.214  | 4182   | 1 | 759.39  | -8.44  |
| P06179 FLIC_SALTY Flagellin           | 17 |                      | NVQVANADLTEAK                                  | 280 | 13 | 5  | 45.53  | b10y4y6y7y11                                                                                    | 1372.73 | 90.715  | 2273   | 2 | 686.87  | 14.14  |
| P06179 FLIC_SALTY Flagellin           | 18 |                      | VSDTAATVTGYADTTIALDNSTFK                       | 180 | 24 | 4  | 12.71  | b10y5*y5y16                                                                                     | 2462.17 | 72.777  | 1612   | 3 | 821.40  | -8.92  |
| P06179 FLIC_SALTY Flagellin           | 19 |                      | LGGADGKTEVVSIGGK                               | 363 | 16 | 8  | 45.28  | b5°b5b10°b10b12y3y5y9                                                                           | 1487.79 | 41.596  | 64005  | 3 | 496.60  | -12.14 |
| P06179 FLIC_SALTY Flagellin           | 20 |                      | SRIEDSDYATEVSNMSR                              | 451 | 17 | 4  | 27.4   | b7b8b10y4                                                                                       | 1959.89 | 49.687  | 32728  | 2 | 980.45  | 8.84   |
| P06179 FLIC_SALTY Flagellin           | 21 |                      | TYAASKAEGHNFK                                  | 379 | 13 | 3  | 28.12  | b3b4b12                                                                                         | 1423.68 | 91.630  | 28520  | 2 | 712.34  | -14.23 |

|                                     |    |                    |                                      |     |    |    |        |                                                                                                                 |         |         |        |   |         |        |
|-------------------------------------|----|--------------------|--------------------------------------|-----|----|----|--------|-----------------------------------------------------------------------------------------------------------------|---------|---------|--------|---|---------|--------|
| P06179 FLIC_SALTY Flagellin         | 22 |                    | LNEIDRVSGQTQFNGVK                    | 119 | 17 | 3  | 23.72  | y5y8y10                                                                                                         | 1904.99 | 79.081  | 4690   | 3 | 635.67  | 3.65   |
| P06179 FLIC_SALTY Flagellin         | 23 |                    | AQPDLAEEAAATTTENPLQKIDAAL<br>AQVDTLR | 392 | 31 | 4  | 36.37  | b6b7b8*b8                                                                                                       | 3235.64 | 96.456  | 4091   | 3 | 1079.22 | -12.22 |
| P06179 FLIC_SALTY Flagellin         | 24 |                    | YKVSDTAATVTGYADTTIALDNS<br>TFK       | 178 | 26 | 8  | 48.82  | b16°b16y12y13°y13y14y15°<br>y15                                                                                 | 2753.35 | 136.552 | 3124   | 3 | 918.45  | -1.51  |
| P06179 FLIC_SALTY Flagellin         | 25 |                    | SDLGAVQNRFNSAITNLGNTVNN<br>LTSAR     | 423 | 28 | 10 | 39.86  | b7*b7b8b11b25y7°y7y8°y8°<br>*y8                                                                                 | 2947.48 | 136.389 | 2275   | 2 | 1474.24 | -7.29  |
| P06179 FLIC_SALTY Flagellin         | 26 |                    | QINSQTLGLDLTNVQQKYK                  | 161 | 19 | 3  | 24.11  | b3b5b6                                                                                                          | 2191.18 | 70.722  | 1713   | 2 | 1096.09 | 3.23   |
| P06179 FLIC_SALTY Flagellin         | 27 |                    | MAQVINTNSLSLLTQNNLNKSQS<br>ALGTAIER  | 0   | 31 | 4  | 16.18  | b4b6b9y9                                                                                                        | 3329.76 | 79.099  | 1537   | 3 | 1110.59 | 2.20   |
| P06179 FLIC_SALTY Flagellin         | 28 |                    | VTVTGGTGKDGYYEVSVDK                  | 233 | 19 | 5  | 25.87  | b7b15°b15b16y13                                                                                                 | 1974.94 | 91.154  | 1515   | 2 | 987.98  | -10.63 |
| P06179 FLIC_SALTY Flagellin         | 29 | Phosphoryl STY(13) | TNGEVTLAGGATSPLTGGLPATA<br>TEDVK     | 252 | 28 | 4  | 22.33  | b4b12b13y11                                                                                                     | 2708.28 | 85.765  | 3348   | 2 | 1354.65 | -3.34  |
| P06179 FLIC_SALTY Flagellin         | 30 |                    | ELAVQSAN                             | 93  | 8  | 1  | 8.49   | y6                                                                                                              | 831.43  | 57.766  | 5723   | 2 | 416.22  | 10.86  |
| P06179 FLIC_SALTY Flagellin         | 31 |                    | LDSIQAEITQR                          | 108 | 11 | 0  | 8.49   |                                                                                                                 | 1273.69 | 57.771  | 2670   | 2 | 637.35  | 9.20   |
| P52616 FLJB_SALTY Phase 2 flagellin | 1  |                    | AQILQQAGTSVLAQANQVPQNVL<br>SLLR      | 479 | 27 | 35 | 237.44 | b2*b2b3*b3b4b5*b5b6b7*<br>b7b8b11°b11b12b13b14*b<br>14b15°b15b18*b18y1y2y3<br>y4y5y6y7y9y10y12*y12y1<br>3y14y27 | 2860.60 | 104.587 | 111231 | 3 | 954.20  | -0.09  |
| P52616 FLJB_SALTY Phase 2 flagellin | 2  |                    | AQVINTNSLSLLTQNNLNK                  | 1   | 19 | 14 | 63.72  | b2*b2b4b6y1y2y3y4*y4y7°<br>y8y10y15y19                                                                          | 2085.15 | 73.796  | 81074  | 2 | 1043.08 | 7.73   |
| P52616 FLJB_SALTY Phase 2 flagellin | 3  |                    | NANDGISIAQTTEGALNEINNNLQ<br>R        | 66  | 25 | 14 | 70.86  | b2b6°b6b8b13b14b15b16y<br>2*y2y3y4y13y25                                                                        | 2670.34 | 85.772  | 63265  | 2 | 1335.67 | 10.24  |
| P52616 FLJB_SALTY Phase 2 flagellin | 4  |                    | SQSALGTAIER                          | 20  | 11 | 11 | 63.97  | b2°b2*b2b3b8y1y5y6y7y9°<br>y11                                                                                  | 1132.59 | 40.765  | 62201  | 2 | 566.80  | -3.34  |
| P52616 FLJB_SALTY Phase 2 flagellin | 5  |                    | YFVTIGGFTGADAAK                      | 234 | 15 | 6  | 31.82  | b8b9y1y3y7y15                                                                                                   | 1517.77 | 72.392  | 58203  | 2 | 759.39  | 1.05   |
| P52616 FLJB_SALTY Phase 2 flagellin | 6  |                    | VSGQTQFNGVK                          | 125 | 11 | 6  | 38.32  | b9b10y5y9*y9y11                                                                                                 | 1164.60 | 32.129  | 52799  | 2 | 582.80  | -4.51  |
| P52616 FLJB_SALTY Phase 2 flagellin | 7  |                    | INSAKDDAAGQAIANR                     | 37  | 16 | 17 | 89.12  | b2*b2b6*b6b9°b9*b9y4y5°<br>*y5y7*y7y9y10y11*y11y1<br>2                                                          | 1614.80 | 29.196  | 49410  | 3 | 538.94  | -9.98  |
| P52616 FLJB_SALTY Phase 2 flagellin | 8  |                    | SDLGAVQNR                            | 434 | 9  | 10 | 61.7   | b2b5°b5y1y4y5y6*y6y7y9                                                                                          | 959.48  | 26.697  | 38352  | 2 | 480.25  | -7.38  |
| P52616 FLJB_SALTY Phase 2 flagellin | 9  |                    | TEVVTIDGK                            | 381 | 9  | 5  | 30.49  | b7b9y5y6y9                                                                                                      | 961.51  | 51.117  | 25208  | 2 | 481.26  | -13.58 |
| P52616 FLJB_SALTY Phase 2 flagellin | 10 |                    | DDAAGQAIANR                          | 42  | 11 | 3  | 24.31  | b3b7y7                                                                                                          | 1101.52 | 27.062  | 14037  | 2 | 551.26  | -5.32  |
| P52616 FLJB_SALTY Phase 2 flagellin | 11 |                    | ELAVQSANSTNSQSDLSIQAEIT<br>QR        | 93  | 26 | 12 | 41.8   | b2°b2b3b12b13b16y2*y2y<br>7y12*y12y13                                                                           | 2805.36 | 57.789  | 13136  | 4 | 702.10  | 4.96   |
| P52616 FLJB_SALTY Phase 2 flagellin | 12 |                    | TTSYTAADGTTK                         | 357 | 12 | 11 | 74.58  | b1b4°b4b7b11y5y7°y7y8y1°<br>ly12                                                                                | 1216.58 | 28.694  | 12503  | 3 | 406.20  | 7.12   |
| P52616 FLJB_SALTY Phase 2 flagellin | 13 |                    | FNSAITNLGNTVNNLSEAR                  | 443 | 19 | 4  | 33.36  | b7b10b12b14                                                                                                     | 2035.02 | 56.083  | 5356   | 4 | 509.51  | 0.00   |
| P52616 FLJB_SALTY Phase 2 flagellin | 14 |                    | NALIAGGVDATDANGAELVK                 | 299 | 20 | 5  | 14.37  | b1b3b16y2y16                                                                                                    | 1898.98 | 93.124  | 2132   | 3 | 633.67  | 0.84   |
| P52616 FLJB_SALTY Phase 2 flagellin | 15 |                    | QINSQTLGLDSLNVQK                     | 161 | 16 | 4  | 25.53  | b3b7b8*b8                                                                                                       | 1757.96 | 64.233  | 3920   | 3 | 586.66  | 12.99  |
| P52616 FLJB_SALTY Phase 2 flagellin | 16 |                    | MAQVINTNSLSLLTQNNLNK                 | 0   | 20 | 3  | 23.79  | b4b5b9                                                                                                          | 2216.12 | 94.342  | 3612   | 2 | 1108.57 | -20.71 |
| P52616 FLJB_SALTY Phase 2 flagellin | 17 |                    | AYANNGTTLDVSLDDAAIK                  | 189 | 20 | 3  | 14.37  | b3b7y14                                                                                                         | 2008.95 | 113.347 | 2150   | 2 | 1004.98 | -14.70 |
| P52616 FLJB_SALTY Phase 2 flagellin | 18 |                    | NGDYEYVNVATDGTVTLAAGATK              | 249 | 22 | 3  | 22.19  | b15y15y16                                                                                                       | 2167.05 | 100.770 | 1551   | 2 | 1084.03 | -1.13  |
| P52616 FLJB_SALTY Phase 2 flagellin | 19 |                    | FDADNNKYFVTIGGFTGADAAK               | 227 | 22 | 3  | 13.44  | b11y3y6                                                                                                         | 2322.12 | 77.723  | 11983  | 3 | 774.71  | 8.94   |

|                                        |    |                  |                                     |     |    |    |        |                                                                                                                      |         |         |        |   |         |        |
|----------------------------------------|----|------------------|-------------------------------------|-----|----|----|--------|----------------------------------------------------------------------------------------------------------------------|---------|---------|--------|---|---------|--------|
| P52616 FLJB_SALTY Phase 2 flagellin    | 20 |                  | TYNASKAAGHDFK                       | 390 | 13 | 7  | 54.56  | b4b8b9b12y3y9°y9                                                                                                     | 1409.66 | 45.617  | 10753  | 2 | 705.33  | -13.86 |
| P52616 FLJB_SALTY Phase 2 flagellin    | 21 |                  | AGDKYYAADYDEATGAIK                  | 337 | 18 | 4  | 29.15  | b4b5y9y11                                                                                                            | 1921.88 | 81.787  | 8291   | 3 | 641.30  | -3.24  |
| P52616 FLJB_SALTY Phase 2 flagellin    | 22 |                  | TEVVITDGKTYNASK                     | 381 | 15 | 3  | 18.14  | b7b11y10                                                                                                             | 1625.82 | 98.461  | 2821   | 3 | 542.61  | -8.26  |
| P52616 FLJB_SALTY Phase 2 flagellin    | 23 | Phosphoryl STY() | VRELAVQSANSTNSQSDLDISIAEITQR        | 91  | 28 | 5  | 11.71  | b11y7°y7y9°y9                                                                                                        | 3140.48 | 55.647  | 3032   | 3 | 1047.50 | 1.32   |
| P0A1Z2 SKP_SALTY Chaperone protein skp | 1  |                  | TGVSNTLENEFK                        | 39  | 12 | 22 | 153.69 | b3b4°b4b8b9°b9y2y4y5°y5y6y7y8°y8*y8y9°y9y10°y10y11°y11y12                                                            | 1338.66 | 56.539  | 224426 | 2 | 669.83  | 2.55   |
| P0A1Z2 SKP_SALTY Chaperone protein skp | 2  |                  | IAIVNMGNLFQQVAQK                    | 23  | 16 | 27 | 198.19 | b2b3b4b6°b6b7°b7b9°b11b12b15°b15y1y2*y2y3y5*y5y6y7y8y10y11y12y13*y13y16                                              | 1773.97 | 89.023  | 195004 | 2 | 887.49  | 3.10   |
| P0A1Z2 SKP_SALTY Chaperone protein skp | 3  |                  | VANDQSIDLVDANTVAYNSSDVKDITADVLK     | 126 | 32 | 12 | 30.43  | b2b4°b4b9°b9b11b12°b12b18y1y15y32                                                                                    | 3392.73 | 89.044  | 63318  | 3 | 1131.58 | 7.84   |
| P0A1Z2 SKP_SALTY Chaperone protein skp | 4  |                  | AQAFEKDR                            | 97  | 8  | 6  | 36.1   | b2°b2b3y3y6y8                                                                                                        | 964.48  | 17.171  | 25851  | 2 | 482.74  | -7.66  |
| P0A1Z2 SKP_SALTY Chaperone protein skp | 5  |                  | LEKDVMSQR                           | 82  | 9  | 4  | 38.27  | b4°b4b5b6                                                                                                            | 1105.56 | 47.932  | 4816   | 2 | 553.28  | -6.40  |
| P0A1Z2 SKP_SALTY Chaperone protein skp | 6  |                  | VANDQSIDLVDANTVAYNSSDVK             | 126 | 24 | 8  | 23.61  | b2b3b7°b7y2y6y9y13                                                                                                   | 2537.23 | 115.781 | 3001   | 3 | 846.41  | -3.85  |
| P0A1Z2 SKP_SALTY Chaperone protein skp | 7  |                  | AAELQK                              | 53  | 6  | 1  | 13.62  | y3                                                                                                                   | 659.38  | 57.191  | 6796   | 1 | 659.38  | 13.61  |
| P0A1Z2 SKP_SALTY Chaperone protein skp | 8  |                  | KVANDQSIDLVDANTVAYNSSDVK            | 125 | 25 | 6  | 23.1   | b5°b5b6b10y6*y6                                                                                                      | 2665.33 | 91.691  | 6337   | 2 | 1333.17 | -1.10  |
| P0A1Z2 SKP_SALTY Chaperone protein skp | 9  |                  | AAELQKMETDLQSK                      | 53  | 14 | 3  | 19.29  | b4b9y7                                                                                                               | 1591.80 | 42.212  | 3495   | 4 | 398.71  | 0.31   |
| P0A1Z2 SKP_SALTY Chaperone protein skp | 10 | Oxidation+M(11)  | WLLAAGGLAMVTSAQAADK                 | 3   | 20 | 3  | 14.37  | b18y8y13                                                                                                             | 2003.08 | 80.733  | 31510  | 2 | 1002.04 | 8.90   |
| P0A1Z2 SKP_SALTY Chaperone protein skp | 11 |                  | VANDQSIDL                           | 126 | 10 | 2  | 9.82   | y8°y8                                                                                                                | 1073.56 | 89.015  | 1741   | 2 | 537.28  | 9.55   |
| P64076 ENO_SALTY Enolase               | 1  |                  | FNQIGSLTETLAAIK                     | 342 | 15 | 26 | 211.01 | b2°b2b3°b3b4°b4b5b7°b7b13b14b15y1y2y3y4y5y6y7y8y9y10y11y12y13y15                                                     | 1605.88 | 84.792  | 345691 | 2 | 803.45  | -0.99  |
| P64076 ENO_SALTY Enolase               | 2  |                  | SGETEDATIADLAVGTAAGQIK              | 371 | 22 | 41 | 305.13 | b2b3b7°b7b8°b8b9°b9b10°b10b11b12°b12b13°b13b14°b14b16°b16b18b22y1y2y3y4y5y6y7y8°y8y9y10y12*y12y13°y13y14y15y16y17y22 | 2118.07 | 74.381  | 195222 | 2 | 1059.54 | 7.15   |
| P64076 ENO_SALTY Enolase               | 3  |                  | AVGAVNGPIAQAILGK                    | 66  | 16 | 10 | 60.26  | b2b3b5b13y2y10y11y12y14y16                                                                                           | 1478.87 | 74.137  | 161748 | 2 | 739.94  | -2.06  |
| P64076 ENO_SALTY Enolase               | 4  |                  | YSMPVPMMNIIINGGEHADNNVDIQEFMIQPVGAK | 143 | 34 | 18 | 97.58  | b2°b2b3°b3b4b5°b5b23y3y5y6*y6y7y8y9y29y31y34                                                                         | 3759.79 | 97.599  | 138609 | 3 | 1253.94 | 7.66   |
| P64076 ENO_SALTY Enolase               | 5  |                  | DAGYTAVISHR                         | 360 | 11 | 11 | 87.19  | b2b4b11y2y3y4y5y6y7y9y11                                                                                             | 1189.59 | 40.155  | 134876 | 2 | 595.30  | -5.23  |
| P64076 ENO_SALTY Enolase               | 6  |                  | GMNTAVGDEGGYAPNLGSNAEALAVIAEAVK     | 200 | 31 | 24 | 146.77 | b2b4b5°b5°b5b6°b6°b6b8b13y1y2y3y4y5y6y7y8y9y10y15y18y25y31                                                           | 2989.46 | 94.213  | 134300 | 3 | 997.16  | 1.63   |
| P64076 ENO_SALTY Enolase               | 7  |                  | GIANSILIK                           | 333 | 9  | 11 | 76.17  | b2b3b5°b5y1y2y3y5y6y7y9                                                                                              | 928.57  | 59.293  | 95698  | 2 | 464.79  | -10.12 |
| P64076 ENO_SALTY Enolase               | 8  |                  | GMPLYEHIAELNGTPGK                   | 126 | 17 | 6  | 24.97  | b2y2y3y5y6y17                                                                                                        | 1826.89 | 66.014  | 94956  | 3 | 609.64  | -10.96 |



|                                                                           |    |                      |                                             |     |    |    |        |                                                                                       |         |         |        |   |         |        |
|---------------------------------------------------------------------------|----|----------------------|---------------------------------------------|-----|----|----|--------|---------------------------------------------------------------------------------------|---------|---------|--------|---|---------|--------|
| P64076 ENO_SALTY Enolase                                                  | 9  |                      | IQLVGDDLFTNTK                               | 311 | 14 | 15 | 72.84  | b2*b2b10y2°y2y4y5°y5*y5y6*y6y9y11y12y14                                               | 1562.85 | 76.617  | 81642  | 2 | 781.93  | 4.37   |
| P64076 ENO_SALTY Enolase                                                  | 10 |                      | ILKEGIEK                                    | 325 | 8  | 5  | 49.32  | b4y4y5y6y8                                                                            | 929.56  | 28.250  | 28147  | 2 | 465.28  | -8.47  |
| P64076 ENO_SALTY Enolase                                                  | 11 |                      | IMIDLDGTENK                                 | 92  | 11 | 9  | 65.52  | b2y2y4y6y7y8y9°y9y11                                                                  | 1248.61 | 57.874  | 20394  | 2 | 624.81  | -3.13  |
| P64076 ENO_SALTY Enolase                                                  | 12 | Carbamidomethyl+C(8) | DITLAMDCAASEFYKDGK                          | 239 | 18 | 4  | 15.58  | b2b6y4y9                                                                              | 2034.91 | 77.639  | 10761  | 3 | 678.98  | -1.80  |
| P64076 ENO_SALTY Enolase                                                  | 13 |                      | AFTSEEFTHFLEELTK                            | 266 | 16 | 4  | 24.26  | b9b14y5y11                                                                            | 1928.91 | 103.325 | 156725 | 3 | 643.64  | -7.47  |
| P64076 ENO_SALTY Enolase                                                  | 14 |                      | GNPTVEAEVHLEGGFVGMAAAPS<br>GASTGSR          | 16  | 30 | 3  | 21.99  | b3y6y7                                                                                | 2856.38 | 91.273  | 32186  | 3 | 952.80  | 9.15   |
| P64076 ENO_SALTY Enolase                                                  | 15 |                      | EIIDSR                                      | 10  | 6  | 3  | 40.07  | b3b4b5                                                                                | 732.38  | 27.357  | 18229  | 1 | 732.38  | -8.25  |
| P64076 ENO_SALTY Enolase                                                  | 16 | Carbamidomethyl+C(8) | DITLAMDCAASEFYK                             | 239 | 15 | 3  | 18.14  | b12y3y5                                                                               | 1734.73 | 70.506  | 4404   | 4 | 434.44  | -21.67 |
| P64076 ENO_SALTY Enolase                                                  | 17 |                      | QYPIVSIEDGLDESDWDGFAYQTK                    | 282 | 24 | 5  | 16.87  | b10b15y6*y6y9                                                                         | 2776.31 | 91.447  | 2761   | 3 | 926.11  | 16.62  |
| P64076 ENO_SALTY Enolase                                                  | 18 |                      | IEEALGEKAPYNGR                              | 411 | 14 | 5  | 30.74  | b7y5y6y9°y9                                                                           | 1546.77 | 38.349  | 26204  | 3 | 516.26  | -12.39 |
| P64076 ENO_SALTY Enolase                                                  | 19 |                      | EIIDSRGNPTVEAEVHLEGGFVGMAAAPS<br>GASTGSR    | 10  | 36 | 3  | 10.89  | b5b13y5                                                                               | 3569.73 | 92.395  | 25382  | 4 | 893.19  | 0.55   |
| P64076 ENO_SALTY Enolase                                                  | 20 |                      | DQAGIDKIMIDLDGTENK                          | 85  | 18 | 4  | 22.74  | b6b11°b11b14                                                                          | 1975.96 | 73.821  | 17432  | 2 | 988.48  | -3.40  |
| P64076 ENO_SALTY Enolase                                                  | 21 |                      | EAIRMGSEVFHHLAK                             | 180 | 15 | 3  | 26.22  | b8b12b14                                                                              | 1724.87 | 89.113  | 12610  | 3 | 575.63  | -11.46 |
| P64076 ENO_SALTY Enolase                                                  | 22 |                      | GKGMNTAVGDEGGYAPNLGSNA<br>EALAVIAEAVK       | 198 | 33 | 3  | 11.06  | b5b11y3                                                                               | 3174.58 | 84.194  | 6845   | 3 | 1058.86 | 0.77   |
| P64076 ENO_SALTY Enolase                                                  | 23 |                      | GMNTAVGDEGGYAPNLGSNAEA<br>LAVIAEAVKAAGYELGK | 200 | 39 | 3  | 22.91  | b6b7y5                                                                                | 3778.82 | 90.733  | 2608   | 3 | 1260.28 | -11.18 |
| P64076 ENO_SALTY Enolase                                                  | 24 | Oxidation+M(27)      | YSMPVPMMNINNGEHADNNVDI<br>QEFMIQPVGAK       | 143 | 34 | 4  | 10.98  | b7b13*b13y12                                                                          | 3775.80 | 91.235  | 3111   | 3 | 1259.27 | 9.83   |
| P64076 ENO_SALTY Enolase                                                  | 25 | Oxidation+M(18)      | GNPTVEAEVHLEGGFVGMAAAPS<br>GASTGSR          | 16  | 30 | 6  | 26.38  | b7b10b14b16y6y16                                                                      | 2872.37 | 74.358  | 2572   | 3 | 958.13  | 4.93   |
| P64076 ENO_SALTY Enolase                                                  | 26 | Oxidation+M(2)       | GMPLYEHIAELNGTPGK                           | 126 | 17 | 3  | 23.72  | y6y8y14                                                                               | 1842.90 | 35.189  | 2029   | 3 | 614.97  | -0.73  |
| P64076 ENO_SALTY Enolase                                                  | 27 |                      | ANSILIK                                     | 335 | 7  | 8  | 38.27  | b3°b3*b3b4°b4b5°b5*b5                                                                 | 758.47  | 59.289  | 16247  | 1 | 758.47  | -3.78  |
| P64076 ENO_SALTY Enolase                                                  | 28 |                      | LKEGIEK                                     | 326 | 7  | 0  | 1.21   |                                                                                       | 816.48  | 28.316  | 13561  | 2 | 408.74  | -7.55  |
| P0A1D5 CH10_SALTY 10 kDa<br>chaperonin                                    | 1  |                      | VGDIVIFNDGYGVK                              | 60  | 14 | 24 | 217.59 | b3b4b5°b5b6b11°b11b13y1y2y3y4y5y6y7*y7y8y9y10y11y12y13*y13y14                         | 1495.78 | 72.387  | 307394 | 2 | 748.39  | -0.49  |
| P0A1D5 CH10_SALTY 10 kDa<br>chaperonin                                    | 2  |                      | ILDNGTVQPLDVK                               | 47  | 13 | 32 | 227.98 | b2b3b5*b5b7°b7b8°b8*b8b9b10b11°b11*b11b13y1y2y3°y3y4y5y6*y6y7y8y9y10y11°y11*y11y12y13 | 1411.78 | 56.211  | 269661 | 2 | 706.39  | -0.78  |
| P0A1D5 CH10_SALTY 10 kDa<br>chaperonin                                    | 3  |                      | SAGGIVLTGSAAGK                              | 20  | 14 | 7  | 42.42  | b5°b5y2y3y6y8y9                                                                       | 1188.65 | 42.486  | 113775 | 2 | 594.83  | -5.03  |
| P0A1D5 CH10_SALTY 10 kDa<br>chaperonin                                    | 4  |                      | GEIIAVGK                                    | 37  | 8  | 6  | 54.09  | y2y3y4y5y6y8                                                                          | 786.46  | 40.418  | 35452  | 2 | 393.74  | -9.78  |
| P0A1D5 CH10_SALTY 10 kDa<br>chaperonin                                    | 5  |                      | EVESK                                       | 15  | 5  | 1  | 13.22  | b3                                                                                    | 591.29  | 37.211  | 5138   | 1 | 591.29  | -11.77 |
| P0A1D5 CH10_SALTY 10 kDa<br>chaperonin                                    | 6  |                      | STRGEIIAVGK                                 | 34  | 11 | 4  | 36.73  | b5b6b8y4                                                                              | 1130.66 | 36.705  | 44515  | 2 | 565.83  | 2.05   |
| P0A1D5 CH10_SALTY 10 kDa<br>chaperonin                                    | 7  |                      | VGDIVIFNDGYGVKSEK                           | 60  | 17 | 5  | 22.93  | b3b11*b11y7y9                                                                         | 1839.95 | 96.416  | 5630   | 3 | 613.99  | -1.53  |
| P0A1D5 CH10_SALTY 10 kDa<br>chaperonin                                    | 8  | Oxidation+M(9)       | IDNEEVLIMSES DILAIVEA                       | 77  | 20 | 4  | 21.16  | b7b9b12*b12                                                                           | 2219.09 | 72.820  | 20961  | 3 | 740.37  | -2.86  |
| P0A283 PTGA_SALTY Glucose-ecific<br>phohotransferase enzyme IIA component | 1  |                      | STLTPVVISNMDEIKELIK                         | 133 | 19 | 22 | 141.55 | b2°b2b3°b3b4°b4b13b19y1y3y4°y4y5y6y11*y11y12y13y15y16y17y19                           | 2130.16 | 91.844  | 306410 | 3 | 710.72  | -8.14  |

|                                                                        |   |                |                               |     |    |    |        |                                                                         |         |         |        |   |         |        |
|------------------------------------------------------------------------|---|----------------|-------------------------------|-----|----|----|--------|-------------------------------------------------------------------------|---------|---------|--------|---|---------|--------|
| P0A283 PTGA_SALTY Glucose-ecific phohotransferase enzyme IIA component | 2 |                | MVAPVDGTIGK                   | 59  | 11 | 17 | 140.07 | b1b2b3b4b5b7y2y3y5°y5y6y7y8y9°y9y10y11                                  | 1087.58 | 45.048  | 156933 | 2 | 544.29  | -2.02  |
| P0A283 PTGA_SALTY Glucose-ecific phohotransferase enzyme IIA component | 3 |                | VGDPVIEFDLPLEEK               | 115 | 16 | 17 | 143.76 | b3b4b5b6b7b10y2°y2y3°y3y4y6y9y10y11y13y16                               | 1812.97 | 98.820  | 132578 | 2 | 906.99  | 2.22   |
| P0A283 PTGA_SALTY Glucose-ecific phohotransferase enzyme IIA component | 4 |                | DTGTIEIVAPLSGEIVNIEDVPDVVFAEK | 16  | 29 | 7  | 19.9   | b2b5b7y3°y3y8y11                                                        | 3069.61 | 110.818 | 9278   | 3 | 1023.88 | 7.79   |
| P0A283 PTGA_SALTY Glucose-ecific phohotransferase enzyme IIA component | 5 |                | IVGDGIAIKPTGNK                | 45  | 14 | 13 | 126.3  | b3y3y4y5°y5*y5y6*y6y7y8y10y12y13                                        | 1382.77 | 42.377  | 160442 | 3 | 461.60  | -18.63 |
| P0A283 PTGA_SALTY Glucose-ecific phohotransferase enzyme IIA component | 6 |                | VKVGDPVIEFDLPLEEK             | 113 | 18 | 10 | 67.84  | b5b7b9y3°y3y6y8°y8y10y13                                                | 2040.10 | 94.452  | 143982 | 3 | 680.71  | -10.71 |
| P0A283 PTGA_SALTY Glucose-ecific phohotransferase enzyme IIA component | 7 |                | IAEEGQRVK                     | 106 | 9  | 3  | 38.27  | b3b7b8                                                                  | 1029.56 | 37.883  | 10593  | 2 | 515.28  | -12.45 |
| P0A283 PTGA_SALTY Glucose-ecific phohotransferase enzyme IIA component | 8 |                | PVDGTIGK                      | 62  | 8  | 5  | 31.29  | b3b5°b5b6°b6                                                            | 786.43  | 45.025  | 4398   | 1 | 786.43  | -12.88 |
| P0A283 PTGA_SALTY Glucose-ecific phohotransferase enzyme IIA component | 9 |                | STLTPVVISNMDEIKELIK           | 133 | 19 | 0  | 5.66   |                                                                         | 2113.13 | 91.815  | 2850   | 3 | 705.05  | -5.66  |
| Q8ZK80 RL9_SALTY 50S ribosomal protein L9                              | 1 |                | VANLGSLGDQVNVK                | 8   | 14 | 26 | 190.18 | b1b2b3b6b10b13*b13b14y1y3y4y5*y5y6y7y8y9y10°y10*y10y11°y11y12*y12y13y14 | 1413.77 | 55.510  | 142430 | 2 | 707.39  | 2.94   |
| Q8ZK80 RL9_SALTY 50S ribosomal protein L9                              | 2 |                | LADVLAANAR                    | 57  | 11 | 10 | 70.96  | b2b3y5*y5y6*y6y7y8y9y11                                                 | 1084.60 | 52.114  | 142182 | 2 | 542.80  | -11.93 |
| Q8ZK80 RL9_SALTY 50S ribosomal protein L9                              | 3 |                | DIADAVTAAGVDVAK               | 97  | 15 | 13 | 107.97 | b2°b2b3b6b9y4y6y7y8y9y10y13y15                                          | 1415.74 | 65.125  | 110095 | 2 | 708.37  | 0.43   |
| Q8ZK80 RL9_SALTY 50S ribosomal protein L9                              | 4 |                | MQVILLDK                      | 0   | 8  | 7  | 54.09  | b2*b2y3y4y5y6y8                                                         | 959.55  | 63.037  | 84500  | 2 | 480.28  | -8.65  |
| Q8ZK80 RL9_SALTY 50S ribosomal protein L9                              | 5 |                | INALETVTIASK                  | 71  | 12 | 10 | 87.59  | b2*b2b3b4y3y5y7y10y11y12                                                | 1259.71 | 59.927  | 51132  | 2 | 630.36  | -5.43  |
| Q8ZK80 RL9_SALTY 50S ribosomal protein L9                              | 6 |                | NFLVPK                        | 27  | 6  | 2  | 26.85  | b3y3                                                                    | 717.42  | 49.808  | 31784  | 1 | 717.42  | -9.02  |
| Q8ZK80 RL9_SALTY 50S ribosomal protein L9                              | 7 |                | INALETVTIASKAGDEGK            | 71  | 18 | 4  | 24.5   | y3°y3y4y11                                                              | 1816.98 | 108.775 | 37052  | 2 | 908.99  | 6.25   |
| Q8ZK80 RL9_SALTY 50S ribosomal protein L9                              | 8 |                | DIADAVTAAGVDVAKSEVR           | 97  | 19 | 4  | 14.94  | b6b9y4°y4                                                               | 1886.98 | 102.767 | 1566   | 2 | 943.99  | -2.98  |
| P67093 UG_SALTY Universal stress protein G                             | 1 |                | TIIMPVDVFEMELSDK              | 3   | 16 | 22 | 154.06 | b1°b1b2b3b4°b4b6b7y1y2°y2y3y4y5y6°y6y8y9y10y13y14y16                    | 1866.93 | 103.781 | 81461  | 2 | 933.97  | 6.02   |
| P67093 UG_SALTY Universal stress protein G                             | 2 |                | HATLPVLVVR                    | 132 | 10 | 6  | 68.12  | b2y4y6y7y8y9                                                            | 1104.68 | 59.779  | 74996  | 2 | 552.84  | -6.96  |
| P67093 UG_SALTY Universal stress protein G                             | 3 |                | NPSITTHLLGSNASSVVR            | 114 | 18 | 6  | 24.5   | b2y5y10y11y18*y18                                                       | 1852.97 | 57.603  | 61470  | 3 | 618.33  | -11.27 |
| P67093 UG_SALTY Universal stress protein G                             | 4 |                | FEEHLQHEAETR                  | 57  | 12 | 4  | 22.28  | b8y8°y8y10                                                              | 1525.73 | 41.615  | 7515   | 3 | 509.25  | 14.64  |
| P67093 UG_SALTY Universal stress protein G                             | 5 |                | HAEFLLAQDQGVIIHLHLVPGSASMSLHR | 22  | 28 | 4  | 14.91  | b5b9y7y10                                                               | 3063.60 | 95.648  | 5633   | 3 | 1021.87 | 0.24   |
| P67093 UG_SALTY Universal stress protein G                             | 6 |                | LQTMVGHFSIDPSR                | 69  | 14 | 3  | 24.73  | b10b11y10                                                               | 1587.78 | 45.283  | 3698   | 2 | 794.39  | -12.07 |
| P67093 UG_SALTY Universal stress protein G                             | 7 |                | RFEHLQHEAETR                  | 56  | 13 | 4  | 20.64  | b6y5y7*y7                                                               | 1681.78 | 90.970  | 3799   | 3 | 561.27  | -11.90 |
| P67093 UG_SALTY Universal stress protein G                             | 8 | Oxidation+M(4) | TIIMPVDVFEMELSDK              | 3   | 16 | 3  | 23.69  | b7b8y10                                                                 | 1882.89 | 75.315  | 14100  | 2 | 941.95  | -13.03 |

|                                                          |    |                      |                             |     |    |    |        |                                                          |         |         |        |   |         |        |
|----------------------------------------------------------|----|----------------------|-----------------------------|-----|----|----|--------|----------------------------------------------------------|---------|---------|--------|---|---------|--------|
| [P67093]UG_SALTY Universal stress protein G              | 9  | Oxidation+M(24)      | HAEFLAQDGVIHLLHVLPGSASMSLHR | 22  | 28 | 8  | 54.33  | b5b8b9b10b11b13°b13y6                                    | 3079.61 | 137.276 | 13087  | 3 | 1027.21 | 8.17   |
| [P67093]UG_SALTY Universal stress protein G              | 10 | Oxidation+M(11)      | FGSVRDVVNEMGEELDADVVGSR     | 89  | 25 | 3  | 21.95  | b3b4y14                                                  | 2708.30 | 101.874 | 2870   | 4 | 677.83  | -6.40  |
| [P02910]HISJ_SALTY Histidine-binding periplasmic protein | 1  |                      | VGVLQGTTQETFGNEHWAPK        | 135 | 20 | 19 | 135.47 | b2b3b4y2y3y4y7°y7*y7y8y9*y9y10*y10y11y12y14y15y20        | 2199.07 | 62.232  | 184507 | 3 | 733.70  | -4.11  |
| [P02910]HISJ_SALTY Histidine-binding periplasmic protein | 2  |                      | IGTDPTYAPFESK               | 29  | 13 | 22 | 154.1  | b2b3°b3b4°b4b5°b5b11°b13y1y4y5°y5y6°y6y7y8y9y10y11y12y13 | 1425.69 | 54.177  | 127777 | 2 | 713.35  | 1.11   |
| [P02910]HISJ_SALTY Histidine-binding periplasmic protein | 3  | Carbamidomethyl+C(5) | INTQCTFVENPLDALIPSLK        | 62  | 20 | 19 | 124.75 | b2b3b5b10b16°b16y1y2y3y4°y4y5y6y10y12y14y15y16y20        | 2273.20 | 103.096 | 103961 | 2 | 1137.11 | 8.70   |
| [P02910]HISJ_SALTY Histidine-binding periplasmic protein | 4  |                      | NSDIQPTVASLK                | 120 | 12 | 18 | 97.8   | b1b2°b2b3°b3°b3b4y1y3y4°y4y7y8°y8°y8y9y10y12             | 1272.68 | 46.980  | 90433  | 2 | 636.84  | -3.17  |
| [P02910]HISJ_SALTY Histidine-binding periplasmic protein | 5  |                      | NAQGELVGFDIDLAK             | 42  | 15 | 5  | 29.44  | b1b6b7b14y12                                             | 1589.83 | 78.544  | 44135  | 2 | 795.42  | 5.68   |
| [P02910]HISJ_SALTY Histidine-binding periplasmic protein | 6  |                      | FGGPAVKDEK                  | 201 | 10 | 7  | 61.13  | b2b8y3y5y6y9y10                                          | 1047.54 | 25.629  | 43734  | 2 | 524.27  | -9.44  |
| [P02910]HISJ_SALTY Histidine-binding periplasmic protein | 7  |                      | QQEIAFTDK                   | 99  | 9  | 6  | 38.27  | y1y2y3y4y7y9                                             | 1079.54 | 41.634  | 35473  | 2 | 540.27  | -0.90  |
| [P02910]HISJ_SALTY Histidine-binding periplasmic protein | 8  |                      | GIEIVSYQGQDNIYSDLTAGR       | 155 | 21 | 5  | 18.93  | b3b11y4y7y21                                             | 2299.14 | 77.809  | 11445  | 2 | 1150.08 | 10.09  |
| [P02910]HISJ_SALTY Histidine-binding periplasmic protein | 9  |                      | LFGVGTGMGLR                 | 211 | 11 | 5  | 31.29  | y6°y6y7y9°y9                                             | 1107.59 | 71.341  | 78906  | 2 | 554.30  | -3.20  |
| [P02910]HISJ_SALTY Histidine-binding periplasmic protein | 10 |                      | IDAAFQDEVAASEGFLK           | 176 | 17 | 4  | 22.93  | b5b13y6y11                                               | 1810.91 | 60.155  | 2173   | 2 | 905.96  | 10.99  |
| [P02910]HISJ_SALTY Histidine-binding periplasmic protein | 11 |                      | IDAAFQDEVAASEGFLKQPVGK      | 176 | 22 | 5  | 38.07  | b3y4y18y19y20                                            | 2320.18 | 77.129  | 74095  | 3 | 774.06  | -2.10  |
| [P02910]HISJ_SALTY Histidine-binding periplasmic protein | 12 |                      | RVGVLQGTTQETFGNEHWAPK       | 134 | 21 | 5  | 24.71  | b4b5b12°b12y8                                            | 2355.19 | 57.768  | 9448   | 3 | 785.74  | 4.35   |
| [P02910]HISJ_SALTY Histidine-binding periplasmic protein | 13 | Carbamidomethyl+C(5) | INTQCTFVENPLDALIPSLKAK      | 62  | 22 | 3  | 19.95  | b11b17b19                                                | 2472.28 | 62.304  | 9118   | 3 | 824.76  | -14.81 |
| [P02910]HISJ_SALTY Histidine-binding periplasmic protein | 14 |                      | QQEIAFTDKLYAADSR            | 99  | 16 | 5  | 24.26  | b4°b4b6y6y13                                             | 1855.89 | 68.063  | 5221   | 3 | 619.30  | -12.96 |
| [P02910]HISJ_SALTY Histidine-binding periplasmic protein | 15 |                      | DEKLFVGVTGMGLR              | 208 | 14 | 3  | 24.73  | b6b7y9                                                   | 1479.75 | 57.839  | 4215   | 2 | 740.38  | -6.02  |
| [P02910]HISJ_SALTY Histidine-binding periplasmic protein | 16 |                      | DYKFGGPAVK                  | 198 | 10 | 4  | 47.91  | b3b7b9y3                                                 | 1081.57 | 49.852  | 3614   | 2 | 541.29  | -2.03  |
| [P02910]HISJ_SALTY Histidine-binding periplasmic protein | 17 | Oxidation+M(5)       | IDAIMSSLSITEK               | 85  | 13 | 4  | 34.07  | b3b5b9y11                                                | 1423.74 | 57.799  | 6404   | 3 | 475.25  | 4.89   |
| [Q7CQ05]GRCA_SALTY Autonomous glycy radical cofactor     | 1  |                      | SGFAEDEVVAVSK               | 35  | 13 | 11 | 60     | b2°b2b3b4b12b13y2y8y9y10y13                              | 1337.66 | 53.134  | 114932 | 2 | 669.33  | 2.92   |
| [Q7CQ05]GRCA_SALTY Autonomous glycy radical cofactor     | 2  |                      | VEGGQHNLNVNVLNR             | 66  | 13 | 9  | 88.21  | b3b4b9y4y5y6y7y8y13                                      | 1434.76 | 48.832  | 113274 | 3 | 478.92  | -14.63 |
| [Q7CQ05]GRCA_SALTY Autonomous glycy radical cofactor     | 3  |                      | EIPMEVKPEVR                 | 55  | 11 | 7  | 55.97  | b10y2y4y6y8y9y11                                         | 1326.70 | 47.354  | 85343  | 2 | 663.86  | -3.59  |
| [Q7CQ05]GRCA_SALTY Autonomous glycy radical cofactor     | 4  |                      | MITGIQITK                   | 0   | 9  | 5  | 38.27  | y2y3y6y7y9                                               | 1004.57 | 53.721  | 85255  | 2 | 502.79  | -6.01  |
| [Q7CQ05]GRCA_SALTY Autonomous glycy radical cofactor     | 5  |                      | FNSLTPEQQR                  | 106 | 10 | 12 | 101.76 | b2b3°b3b4y3y4°y4y5y6y7y8y10                              | 1219.61 | 36.819  | 82208  | 2 | 610.31  | -0.70  |
| [Q7CQ05]GRCA_SALTY Autonomous glycy radical cofactor     | 6  |                      | LGEIEYR                     | 48  | 7  | 8  | 50.68  | b2b3y1y2y3y4y6y7                                         | 879.45  | 40.833  | 81106  | 2 | 440.23  | -10.06 |
| [Q7CQ05]GRCA_SALTY Autonomous glycy radical cofactor     | 7  |                      | AANDDLLNSFWLLDSEK           | 9   | 17 | 7  | 23.31  | b2b3y2y7y8°y8y17                                         | 1950.97 | 87.039  | 40582  | 2 | 975.99  | 11.95  |
| [Q7CQ05]GRCA_SALTY Autonomous glycy radical cofactor     | 8  |                      | VSGYAVR                     | 99  | 7  | 5  | 37.46  | b1b3y5y6°y6                                              | 751.40  | 25.954  | 14807  | 2 | 376.20  | -14.13 |

|                                                           |    |  |                            |     |    |    |        |                                                                      |         |         |        |   |        |        |
|-----------------------------------------------------------|----|--|----------------------------|-----|----|----|--------|----------------------------------------------------------------------|---------|---------|--------|---|--------|--------|
| Q7CQ05 GRCA_SALTY Autonomous glycyl radical cofactor      | 9  |  | FNSLTPEQQRDVIAR            | 106 | 15 | 4  | 18.14  | b5y3y6y15                                                            | 1773.91 | 46.208  | 3865   | 3 | 591.97 | -10.67 |
| Q7CQ05 GRCA_SALTY Autonomous glycyl radical cofactor      | 10 |  | TFTESL                     | 121 | 6  | 2  | 29.86  | b3b5                                                                 | 697.34  | 54.093  | 52472  | 1 | 697.34 | -3.94  |
| Q7CQ05 GRCA_SALTY Autonomous glycyl radical cofactor      | 11 |  | AANDDLLNSFWLLDSEKGEAR      | 9   | 21 | 26 | 239.67 | b3b5°b5b6°b6*b6b7°b7*b7b9y4y5y7y8y9°y9y10y11y12y13y14y15y16y17y18y19 | 2364.14 | 91.735  | 193433 | 3 | 788.72 | -4.03  |
| Q7CQ05 GRCA_SALTY Autonomous glycyl radical cofactor      | 12 |  | HPEKYPQLTIR                | 88  | 11 | 3  | 36.07  | b6b7b8                                                               | 1381.76 | 70.379  | 31615  | 3 | 461.26 | -2.03  |
| Q7CQ05 GRCA_SALTY Autonomous glycyl radical cofactor      | 13 |  | MITGIQITKAANDDLLNSFWLLDSEK | 0   | 26 | 4  | 12.14  | b3°b3b15y8                                                           | 2936.49 | 104.634 | 11894  | 3 | 979.50 | -7.48  |
| Q7CQ05 GRCA_SALTY Autonomous glycyl radical cofactor      | 14 |  | SGFAEDVVAVSKLGEIEYR        | 35  | 20 | 3  | 14.37  | b3y5y7                                                               | 2198.07 | 77.251  | 4095   | 3 | 733.36 | -10.77 |
| Q7CQ05 GRCA_SALTY Autonomous glycyl radical cofactor      | 15 |  | PMEVKPEVR                  | 57  | 9  | 3  | 31.29  | b3b4b7                                                               | 1084.57 | 47.335  | 54618  | 2 | 542.79 | -6.98  |
| Q7CQ05 GRCA_SALTY Autonomous glycyl radical cofactor      | 16 |  | TGIQITK                    | 2   | 7  | 3  | 23.29  | b4b5°b5                                                              | 760.46  | 53.698  | 3593   | 1 | 760.46 | 5.94   |
| Q7CQ05 GRCA_SALTY Autonomous glycyl radical cofactor      | 17 |  | EGGQHNLNVNVL               | 67  | 12 | 0  | 3.23   |                                                                      | 1335.69 | 48.860  | 2052   | 2 | 668.35 | -14.44 |
| Q7CQ05 GRCA_SALTY Autonomous glycyl radical cofactor      | 18 |  | EIPMEVKPEVR                | 55  | 11 | 2  | 13.3   | b6y7                                                                 | 1308.68 | 47.328  | 16535  | 3 | 436.90 | -10.26 |
| P23905 DGAL_SALTY D-galactose-binding periplasmic protein | 1  |  | SSIPVFGVDALPEALALVK        | 250 | 19 | 19 | 155.74 | b6°b6b7°b7b10y1y2y3y4y5y8y9y10y11y12y13y14y16y19                     | 1926.10 | 107.134 | 87899  | 2 | 963.56 | 5.32   |
| P23905 DGAL_SALTY D-galactose-binding periplasmic protein | 2  |  | SGAMAGTVLNDANNQAK          | 269 | 17 | 17 | 101.49 | b2b3b5b13y2y5y8y9*y9y10y11*y11y12*y12*y12y13y17                      | 1661.80 | 44.992  | 83882  | 2 | 831.41 | 8.30   |
| P23905 DGAL_SALTY D-galactose-binding periplasmic protein | 3  |  | ALAINLVDPAAGTVIEK          | 84  | 18 | 15 | 90.22  | b2b3b4b5*b5b6y2°y2y6y10y11y13y14*y14y18                              | 1766.01 | 79.623  | 73005  | 2 | 883.51 | 2.90   |
| P23905 DGAL_SALTY D-galactose-binding periplasmic protein | 4  |  | VPYVGVDKDNLSEFTQK          | 315 | 17 | 14 | 88.65  | b3b12*b12y3y4y6°y6y8y9°y9*y9y11y13y17                                | 1938.97 | 60.418  | 53133  | 3 | 646.99 | -8.12  |
| P23905 DGAL_SALTY D-galactose-binding periplasmic protein | 5  |  | GQNVPPVFFNKEPSR            | 104 | 15 | 4  | 18.14  | b4b5*b14y6                                                           | 1717.89 | 56.103  | 16666  | 3 | 573.30 | -8.03  |
| P23905 DGAL_SALTY D-galactose-binding periplasmic protein | 6  |  | MDAWLSGPNANK               | 214 | 12 | 5  | 29.48  | y6y10*y10y11y12                                                      | 1303.60 | 48.184  | 15973  | 2 | 652.30 | -9.46  |
| P23905 DGAL_SALTY D-galactose-binding periplasmic protein | 7  |  | DNLSEFTQK                  | 323 | 9  | 5  | 16.02  | b6b7*b9y8y9                                                          | 1081.51 | 32.321  | 2965   | 2 | 541.26 | -9.14  |
| P23905 DGAL_SALTY D-galactose-binding periplasmic protein | 8  |  | EPSR                       | 115 | 4  | 1  | 12.82  | b3                                                                   | 488.25  | 33.914  | 20733  | 1 | 488.25 | 7.50   |
| P23905 DGAL_SALTY D-galactose-binding periplasmic protein | 9  |  | ELNDK                      | 187 | 5  | 1  | 13.22  | b3                                                                   | 618.31  | 79.824  | 17194  | 1 | 618.31 | -4.44  |
| P23905 DGAL_SALTY D-galactose-binding periplasmic protein | 10 |  | HWQANQGWDLNK               | 148 | 12 | 3  | 29.48  | b3b4b8                                                               | 1496.67 | 48.028  | 16489  | 2 | 748.84 | -19.66 |
| P23905 DGAL_SALTY D-galactose-binding periplasmic protein | 11 |  | IENK                       | 308 | 4  | 1  | 12.82  | y3                                                                   | 503.28  | 43.608  | 4512   | 1 | 503.28 | 2.61   |
| P23905 DGAL_SALTY D-galactose-binding periplasmic protein | 12 |  | TTYVVKELNDK                | 181 | 11 | 3  | 27.32  | b3b4y5                                                               | 1309.68 | 75.703  | 77559  | 2 | 655.34 | -14.45 |

|                                                           |    |  |                                      |     |    |    |        |                                                                 |         |         |       |   |         |        |
|-----------------------------------------------------------|----|--|--------------------------------------|-----|----|----|--------|-----------------------------------------------------------------|---------|---------|-------|---|---------|--------|
| P23905 DGAL_SALTY D-galactose-binding periplasmic protein | 13 |  | SAPDVQLLMNDSQNDQSKQNDQI<br>DVLLAK    | 52  | 29 | 6  | 37.64  | b12b13y3y5y11y22                                                | 3227.60 | 77.171  | 41123 | 3 | 1076.54 | 3.86   |
| P23905 DGAL_SALTY D-galactose-binding periplasmic protein | 14 |  | GQNVPVVFFNKEPSR                      | 104 | 15 | 4  | 29.44  | b8y4y8y11                                                       | 1717.88 | 60.270  | 13176 | 3 | 573.30  | -13.43 |
| P23905 DGAL_SALTY D-galactose-binding periplasmic protein | 15 |  | ELNDKGIQTEQLALDTAMWDTAQ<br>AK        | 187 | 25 | 9  | 52.77  | b9b12°b12y5y6y7°y7*y7y8                                         | 2790.33 | 79.071  | 11453 | 3 | 930.78  | -10.50 |
| P23905 DGAL_SALTY D-galactose-binding periplasmic protein | 16 |  | ALDSYDKAYYVGTDSK                     | 120 | 16 | 3  | 17.16  | b7y4y9                                                          | 1795.83 | 50.405  | 10849 | 3 | 599.28  | -4.62  |
| P23905 DGAL_SALTY D-galactose-binding periplasmic protein | 17 |  | HWQANQGWDLNKDGK                      | 148 | 15 | 3  | 18.14  | b4b9y3                                                          | 1796.83 | 46.397  | 9038  | 3 | 599.62  | -6.73  |
| P23905 DGAL_SALTY D-galactose-binding periplasmic protein | 18 |  | GAADGTSWKIENK                        | 299 | 13 | 3  | 20.64  | b12y4y10                                                        | 1376.69 | 38.331  | 6631  | 2 | 688.85  | 5.94   |
| P23905 DGAL_SALTY D-galactose-binding periplasmic protein | 19 |  | MDAWLSGPNANKIEVVIANNDA<br>MAMGAVEALK | 214 | 32 | 3  | 11.14  | b13b15y7                                                        | 3343.66 | 102.170 | 3751  | 4 | 836.67  | 4.82   |
| P23905 DGAL_SALTY D-galactose-binding periplasmic protein | 20 |  | VPYVGVDKDNLSEFTQK                    | 315 | 17 | 5  | 27.4   | b12y6°y6y7y16                                                   | 1938.98 | 64.179  | 2078  | 2 | 970.00  | 2.08   |
| P23905 DGAL_SALTY D-galactose-binding periplasmic protein | 21 |  | AWLSGPNANK                           | 216 | 10 | 0  | 2.83   |                                                                 | 1057.54 | 48.207  | 2180  | 2 | 529.27  | -6.12  |
| Q8ZKQ1 LSRB_SALTY Autoinducer 2-binding protein lsrB      | 1  |  | AYPDLDAIIPDANALPAAQAEE<br>NLKR       | 209 | 28 | 21 | 156.63 | b2b6b7°b7b8b9b10°b10b1<br>3y3y4y6y9y10y12y16y18y<br>19y20y26y28 | 2863.50 | 86.791  | 85387 | 3 | 955.17  | 3.24   |
| Q8ZKQ1 LSRB_SALTY Autoinducer 2-binding protein lsrB      | 2  |  | NNLAIVGFSTPNVMRPYVQR                 | 237 | 20 | 13 | 69.48  | b3b4*b4b9*b9y12y14y15*<br>y15y16°y16y17y20                      | 2276.17 | 77.196  | 83263 | 3 | 759.39  | -11.80 |
| Q8ZKQ1 LSRB_SALTY Autoinducer 2-binding protein lsrB      | 3  |  | VAFFYSSPTVTDQNQWVK                   | 154 | 18 | 8  | 61.39  | b12y5y6y8y11y12y13y18                                           | 2117.06 | 76.718  | 67532 | 2 | 1059.03 | 10.26  |
| Q8ZKQ1 LSRB_SALTY Autoinducer 2-binding protein lsrB      | 4  |  | LVGVGFFTSGNGAQEAGK                   | 35  | 19 | 17 | 114.14 | b2b3b14b15b17y2y3y4y5°<br>y5y12y13°y13y14y15y17y1<br>9          | 1795.91 | 70.612  | 54567 | 2 | 898.46  | 6.80   |
| Q8ZKQ1 LSRB_SALTY Autoinducer 2-binding protein lsrB      | 5  |  | ISQEHPGWEIVTTQFGYNDATK               | 177 | 22 | 4  | 24.23  | b9y5y7y8                                                        | 2521.20 | 71.777  | 51502 | 3 | 841.07  | 1.26   |
| Q8ZKQ1 LSRB_SALTY Autoinducer 2-binding protein lsrB      | 6  |  | NMPMNVGDSLDIPGIGK                    | 284 | 17 | 8  | 39.75  | b2b6b13b16y14y15*y15y1<br>7                                     | 1757.87 | 78.682  | 46592 | 2 | 879.44  | 5.28   |
| Q8ZKQ1 LSRB_SALTY Autoinducer 2-binding protein lsrB      | 7  |  | VTVSPNSEQGYHYEAK                     | 301 | 16 | 16 | 120.51 | b3°b3b6b7°b7y2y4y5y7°y7<br>y8y9y10y12y13y16                     | 1808.83 | 35.314  | 45123 | 3 | 603.61  | -10.46 |
| Q8ZKQ1 LSRB_SALTY Autoinducer 2-binding protein lsrB      | 8  |  | SYYINQGTPK                           | 124 | 10 | 10 | 40.13  | b2°b2b5y3y8°y8*y8y9*y9y<br>10                                   | 1170.58 | 37.195  | 37791 | 2 | 585.80  | 4.59   |
| Q8ZKQ1 LSRB_SALTY Autoinducer 2-binding protein lsrB      | 9  |  | EFGLWDVVQQGK                         | 261 | 12 | 7  | 65.16  | b3b8b10°b10y7y8y9                                               | 1405.71 | 81.632  | 36201 | 2 | 703.36  | -1.22  |
| Q8ZKQ1 LSRB_SALTY Autoinducer 2-binding protein lsrB      | 10 |  | GNGIVLLPER                           | 317 | 10 | 6  | 33.9   | b2*b2y3y4y6y10                                                  | 1067.61 | 60.338  | 29022 | 2 | 534.31  | -8.69  |
| Q8ZKQ1 LSRB_SALTY Autoinducer 2-binding protein lsrB      | 11 |  | AYPDLDAIIPDANALPAAQAEE<br>NLK        | 209 | 27 | 4  | 11.91  | b2b4y11y24                                                      | 2707.41 | 71.942  | 6907  | 5 | 542.29  | 7.57   |
| Q8ZKQ1 LSRB_SALTY Autoinducer 2-binding protein lsrB      | 12 |  | ISVYVANALLK                          | 273 | 11 | 3  | 36.07  | y6y7y8                                                          | 1190.71 | 72.721  | 36893 | 2 | 595.86  | -6.36  |
| Q8ZKQ1 LSRB_SALTY Autoinducer 2-binding protein lsrB      | 13 |  | IAFIPK                               | 29  | 6  | 1  | 13.62  | y5                                                              | 688.44  | 52.923  | 10874 | 2 | 344.72  | -3.19  |

|                                                      |    |                       |                                        |     |    |    |        |                                                                                       |         |         |        |   |         |        |
|------------------------------------------------------|----|-----------------------|----------------------------------------|-----|----|----|--------|---------------------------------------------------------------------------------------|---------|---------|--------|---|---------|--------|
| Q8ZKQ1 LSRB_SALTY Autoinducer 2-binding protein lsrB | 14 |                       | DNIDK                                  | 332 | 5  | 1  | 13.22  | b4                                                                                    | 604.29  | 66.384  | 4319   | 1 | 604.29  | -1.62  |
| Q8ZKQ1 LSRB_SALTY Autoinducer 2-binding protein lsrB | 15 | Carbamidomethyl+C(12) | ILTWSDTKPECR                           | 111 | 13 | 3  | 20.64  | b5b7y4                                                                                | 1620.80 | 84.058  | 2522   | 2 | 810.91  | 21.92  |
| Q8ZKQ1 LSRB_SALTY Autoinducer 2-binding protein lsrB | 16 |                       | QLGSMLEVMAAHQVDK                       | 134 | 16 | 6  | 34.77  | b3b13y3y5*y5y12                                                                       | 1756.84 | 70.646  | 2427   | 3 | 586.28  | -18.62 |
| Q8ZKQ1 LSRB_SALTY Autoinducer 2-binding protein lsrB | 17 |                       | VTVPNSEQGYHYEAKNGIVLLPER               | 301 | 26 | 3  | 18.29  | b8b10b17                                                                              | 2857.48 | 58.967  | 44963  | 4 | 715.13  | 11.62  |
| Q8ZKQ1 LSRB_SALTY Autoinducer 2-binding protein lsrB | 18 | Carbamidomethyl+C(12) | ILTWSDTKPECRSYYINQGTPK                 | 111 | 23 | 4  | 17.49  | b9b11y3y10                                                                            | 2772.33 | 110.732 | 6827   | 3 | 924.78  | -0.18  |
| Q8ZKQ1 LSRB_SALTY Autoinducer 2-binding protein lsrB | 19 |                       | AKISQEHPGWEIVTTQFGYNDATK               | 175 | 24 | 21 | 111.32 | b7*b7b9*b9*b9b10b23y4y5y7y8y11*y11*y11y12*y12*y12y13*y13y14y22                        | 2720.35 | 68.141  | 4670   | 3 | 907.45  | 6.19   |
| Q8ZKQ1 LSRB_SALTY Autoinducer 2-binding protein lsrB | 20 | Phosphoryl STY(12)    | MIALLTAFGLASAAMTVQAAER                 | 7   | 22 | 4  | 13.44  | b13y6y9*y9                                                                            | 2316.11 | 78.435  | 1893   | 3 | 772.71  | -11.81 |
| P67091 UF_SALTY Universal stress protein F           | 1  |                       | TILVPIDISDSELTQR                       | 3   | 16 | 21 | 154.73 | b2b3*b3b4*b4b13y2*y2y3y4y6*y6y7y8y9y10y12*y12y13y14y16                                | 1799.98 | 81.198  | 104427 | 2 | 900.50  | 5.09   |
| P67091 UF_SALTY Universal stress protein F           | 2  |                       | FNLPADR                                | 78  | 7  | 7  | 37.46  | b2*b2b5b6*b6*b6y4                                                                     | 832.43  | 45.078  | 23618  | 2 | 416.72  | -1.98  |
| P67091 UF_SALTY Universal stress protein F           | 3  |                       | VQAHVAEGSPK                            | 85  | 11 | 7  | 55.97  | b9y2y4y6y8y9y11                                                                       | 1122.58 | 17.434  | 21040  | 2 | 561.79  | -7.83  |
| P67091 UF_SALTY Universal stress protein F           | 4  |                       | ILEMAK                                 | 98  | 6  | 2  | 26.85  | y4y5                                                                                  | 704.40  | 37.203  | 10760  | 1 | 704.40  | -4.68  |
| P67091 UF_SALTY Universal stress protein F           | 5  |                       | VQAHVAEGSPKDK                          | 85  | 13 | 5  | 29.88  | b4b7*b7b9*b9                                                                          | 1365.72 | 68.154  | 12441  | 2 | 683.36  | 4.29   |
| P67091 UF_SALTY Universal stress protein F           | 6  |                       | SQLEAIKK                               | 69  | 9  | 5  | 44.96  | b4*b4b6y3y7                                                                           | 1029.62 | 43.612  | 3215   | 3 | 343.88  | -7.35  |
| P67091 UF_SALTY Universal stress protein F           | 7  |                       | QAHVAEGSPK                             | 86  | 10 | 0  | 2.43   |                                                                                       | 1023.52 | 17.432  | 3149   | 2 | 512.26  | -0.18  |
| P67091 UF_SALTY Universal stress protein F           | 8  |                       | AHVAEGSPK                              | 87  | 9  | 0  | 2.43   |                                                                                       | 895.45  | 17.441  | 1926   | 2 | 448.23  | -10.91 |
| P17215 LIVJ_SALTY Leu/Ile/Val/Thr-binding protein    | 1  |                       | TQFMGPEGVANVSLSNIAGESAEGLLVTKPK        | 240 | 31 | 28 | 178.57 | b1*b1b2*b2b3b4*b4b5b10b12b15y2y3y4y5y6y8y13y14y17y19y22y26y27*y27y28y29y31            | 3144.64 | 87.602  | 241072 | 3 | 1048.88 | 3.80   |
| P17215 LIVJ_SALTY Leu/Ile/Val/Thr-binding protein    | 2  |                       | NYDQVPANKPIVDAIK                       | 271 | 16 | 12 | 69.51  | b2*b2b3b4b11b13y2y3y5y7y11y16                                                         | 1784.93 | 52.573  | 213029 | 3 | 595.65  | -11.97 |
| P17215 LIVJ_SALTY Leu/Ile/Val/Thr-binding protein    | 3  | Carbamidomethyl+C(7)  | YVIGHLCSSSTQPASDIYEDEGILMITPAATAPELTAR | 92  | 38 | 21 | 157.81 | b2b12*b12b16b23b24b25b26b27*b27y4y5y6y8y9y10y11y12y13y15y38                           | 4078.01 | 88.559  | 155907 | 3 | 1360.01 | 7.60   |
| P17215 LIVJ_SALTY Leu/Ile/Val/Thr-binding protein    | 4  |                       | VAVVGAMSGPVAAQYGDQEFTGA<br>EQAIADINAK  | 25  | 32 | 33 | 236.54 | b2b3b4b5b6b7b8b9b13b29y2y3*y3y4y5*y5y6*y6*y6y7y8y9*y9y10y12y13*y13y14*y14y21y25y26y32 | 3207.58 | 89.112  | 148477 | 3 | 1069.87 | 6.77   |
| P17215 LIVJ_SALTY Leu/Ile/Val/Thr-binding protein    | 5  |                       | TTGLSDSQGPTAAK                         | 137 | 14 | 20 | 177.93 | b2*b2b3*b3b4b5b11b12b13y2y3y5y6y8y9y10*y10y11y12y14                                   | 1361.65 | 28.464  | 134190 | 2 | 681.33  | -1.70  |
| P17215 LIVJ_SALTY Leu/Ile/Val/Thr-binding protein    | 6  |                       | ENIDFVYYGGYHPEMGQILR                   | 212 | 20 | 11 | 56.14  | b2y1y2y3y8y9y10*y10y14y16y20                                                          | 2401.13 | 79.157  | 128071 | 3 | 801.05  | -0.31  |
| P17215 LIVJ_SALTY Leu/Ile/Val/Thr-binding protein    | 7  |                       | GGVNVVFFDGITAGEKDFSTLVAR               | 185 | 24 | 18 | 131.55 | b2b3b4b6b8b9b13y2y3y7y10y12y13y14y18y19y20y24                                         | 2499.29 | 101.324 | 102313 | 3 | 833.77  | 1.27   |

|                                                   |    |                       |                                        |     |    |    |        |                                                                                             |         |         |        |   |         |        |
|---------------------------------------------------|----|-----------------------|----------------------------------------|-----|----|----|--------|---------------------------------------------------------------------------------------------|---------|---------|--------|---|---------|--------|
| P17215 LIVJ_SALTY Leu/Ile/Val/Thr-binding protein | 8  |                       | GATVDTVMGPLSWDEK                       | 326 | 16 | 6  | 45.95  | b5b8b14y4y8y9                                                                               | 1705.82 | 77.366  | 13630  | 2 | 853.42  | 7.44   |
| P17215 LIVJ_SALTY Leu/Ile/Val/Thr-binding protein | 9  |                       | GFEFGVFDWHANGTATDAK                    | 346 | 19 | 6  | 20.7   | b2b3b7y4y6y19                                                                               | 2069.96 | 82.616  | 12180  | 3 | 690.66  | 12.50  |
| P17215 LIVJ_SALTY Leu/Ile/Val/Thr-binding protein | 10 |                       | QDPSGAFVWTTYAALQSLQAGLN<br>HSDDPAEIAK  | 290 | 33 | 5  | 11.06  | b2b13y6y14*y14                                                                              | 3501.71 | 108.643 | 12166  | 3 | 1167.91 | 6.27   |
| P17215 LIVJ_SALTY Leu/Ile/Val/Thr-binding protein | 11 | Carbamidomethyl+C(6)  | TLLAGCIALSLSHMAFADDIK                  | 4   | 21 | 3  | 23.53  | b6b7b13                                                                                     | 2247.15 | 66.558  | 11498  | 3 | 749.72  | -1.63  |
| P17215 LIVJ_SALTY Leu/Ile/Val/Thr-binding protein | 12 |                       | QQYGEGLAR                              | 168 | 9  | 6  | 59.94  | b3*b3b4y4y5y6                                                                               | 1021.50 | 31.856  | 5033   | 1 | 1021.50 | -5.56  |
| P17215 LIVJ_SALTY Leu/Ile/Val/Thr-binding protein | 13 |                       | GGVNVVFFDGITAGEK                       | 185 | 16 | 4  | 28.34  | b7b14b15y9                                                                                  | 1609.79 | 58.436  | 2673   | 2 | 805.40  | -22.29 |
| P17215 LIVJ_SALTY Leu/Ile/Val/Thr-binding protein | 14 |                       | KQDPSGAFVWTTYAALQSLQAGL<br>NHSDDPAEIAK | 289 | 34 | 33 | 260.02 | b3*b3b5*b5*b5b6b7b9*b9b11b13*b13b14b15y3y5y6y7y8y9y10y14*y14y15y16y18*y18y19y20y21y22y23y24 | 3629.77 | 101.856 | 318543 | 4 | 908.20  | -5.78  |
| P17215 LIVJ_SALTY Leu/Ile/Val/Thr-binding protein | 15 | Carbamidomethyl+C(10) | LVAVKYDDACDPK                          | 64  | 13 | 3  | 25.41  | b3y8y9                                                                                      | 1493.71 | 38.492  | 35936  | 3 | 498.58  | -12.18 |
| P17215 LIVJ_SALTY Leu/Ile/Val/Thr-binding protein | 16 |                       | GATVDTVMGPLSWDEKGDLK                   | 326 | 20 | 6  | 38.85  | b8b11y8y11y13y15                                                                            | 2119.03 | 76.622  | 4274   | 3 | 707.02  | -2.77  |
| P17215 LIVJ_SALTY Leu/Ile/Val/Thr-binding protein | 17 |                       | GDLKGFEFGVFDWHANGTATDA<br>K            | 342 | 23 | 3  | 13.05  | b3b6y3                                                                                      | 2483.17 | 91.378  | 3111   | 2 | 1242.09 | 4.23   |
| P17215 LIVJ_SALTY Leu/Ile/Val/Thr-binding protein | 18 | Phosphoryl STY(12)    | GGVNVVFFDGITAGEK                       | 185 | 16 | 4  | 24.26  | b4b11y3y12                                                                                  | 1689.76 | 106.778 | 4860   | 2 | 845.39  | -9.32  |
| P0A1E3 CYSK_SALTY Cysteine synthase A             | 1  |                       | YLLQQFSNPANPEIHEK                      | 137 | 18 | 15 | 134.74 | b2b3b9b15y3*y3y4y6y7y9y11y12y15y16y18                                                       | 2141.09 | 72.957  | 130411 | 3 | 714.37  | -5.82  |
| P0A1E3 CYSK_SALTY Cysteine synthase A             | 2  |                       | IQGIGAGFIPGNLDLK                       | 226 | 16 | 16 | 99.63  | b2*b2b3b8b9b14y2y3y7*y7y8y10*y10y12y14y16                                                   | 1612.91 | 82.530  | 121147 | 2 | 806.96  | 3.41   |
| P0A1E3 CYSK_SALTY Cysteine synthase A             | 3  |                       | YLSTALFADLFTKEKELQQ                    | 305 | 18 | 11 | 51.82  | b2b3b15b16y2*y2y5y11y12y14y18                                                               | 2117.10 | 101.620 | 120737 | 2 | 1059.05 | 7.84   |
| P0A1E3 CYSK_SALTY Cysteine synthase A             | 4  |                       | LTLTMPETMSIER                          | 87  | 13 | 14 | 105.98 | b2b5*b5b11y4y6y7y8y9*y9y10y11*y11y13                                                        | 1521.77 | 72.935  | 105948 | 2 | 761.39  | 2.65   |
| P0A1E3 CYSK_SALTY Cysteine synthase A             | 5  |                       | GVLKPGVELVEPTSGNTGIALAYV<br>AAAR       | 56  | 28 | 7  | 29.64  | b11b18y3y6y7y17y28                                                                          | 2753.52 | 80.655  | 77145  | 3 | 918.51  | 0.62   |
| P0A1E3 CYSK_SALTY Cysteine synthase A             | 6  |                       | NIVVILPSSGER                           | 293 | 12 | 12 | 111.02 | b2b3b4b5b6y6y7y8*y8y9y10y12                                                                 | 1283.73 | 62.849  | 69983  | 2 | 642.37  | -1.14  |
| P0A1E3 CYSK_SALTY Cysteine synthase A             | 7  |                       | IYEDNSLTIGHTPLVR                       | 3   | 16 | 7  | 35.08  | b2y4y7y8y14*y14y16                                                                          | 1827.95 | 60.492  | 65861  | 3 | 609.99  | -6.74  |
| P0A1E3 CYSK_SALTY Cysteine synthase A             | 8  |                       | LQEDESFTNK                             | 283 | 10 | 9  | 43.14  | b3*b3y2y6*y6y7y8*y8y10                                                                      | 1210.56 | 33.999  | 48117  | 2 | 605.78  | 2.82   |
| P0A1E3 CYSK_SALTY Cysteine synthase A             | 9  |                       | AEEIVASDPQK                            | 126 | 11 | 10 | 70.96  | b1b2b3y2y3y6y7y8y9y11                                                                       | 1186.59 | 30.488  | 43748  | 2 | 593.80  | -5.66  |
| P0A1E3 CYSK_SALTY Cysteine synthase A             | 10 |                       | VVGITNEEAISTAR                         | 246 | 14 | 8  | 60.41  | b3y7y8y9y10y12*y12y14                                                                       | 1459.77 | 48.329  | 41049  | 2 | 730.39  | -1.84  |
| P0A1E3 CYSK_SALTY Cysteine synthase A             | 11 |                       | YLSTALFADLFTK                          | 305 | 14 | 4  | 19.29  | b5b11y12*y12                                                                                | 1618.84 | 102.573 | 24407  | 2 | 809.93  | 3.92   |
| P0A1E3 CYSK_SALTY Cysteine synthase A             | 12 |                       | IGANMIWDAEK                            | 44  | 11 | 11 | 66.98  | b7b9*b9y1y5*y5y6y9*y9y10y11                                                                 | 1247.61 | 64.281  | 24403  | 2 | 624.31  | 0.20   |
| P0A1E3 CYSK_SALTY Cysteine synthase A             | 13 |                       | TDLITVAVEPTDSPVIAQALAGEEI<br>KPGPHK    | 195 | 31 | 3  | 11.25  | b3b13y5                                                                                     | 3196.66 | 84.109  | 51286  | 4 | 799.92  | -14.28 |
| P0A1E3 CYSK_SALTY Cysteine synthase A             | 14 |                       | ILAK                                   | 27  | 4  | 1  | 12.82  | y3                                                                                          | 444.32  | 44.058  | 6564   | 1 | 444.32  | -5.29  |
| P0A1E3 CYSK_SALTY Cysteine synthase A             | 15 |                       | GAIQKAEEIVASDPQK                       | 121 | 16 | 4  | 25.53  | y5*y5y6y10                                                                                  | 1683.91 | 90.032  | 101765 | 2 | 842.46  | 9.13   |
| P0A1E3 CYSK_SALTY Cysteine synthase A             | 16 |                       | GKTDLITVAVEPTDSPVIAQALAG<br>EEIKPGPHK  | 193 | 33 | 5  | 21.93  | b9y5y10y19y22                                                                               | 3381.79 | 78.751  | 98806  | 4 | 846.20  | -9.60  |

|                                                                  |    |                       |                                     |     |    |    |        |                                                                                               |         |         |        |   |         |        |
|------------------------------------------------------------------|----|-----------------------|-------------------------------------|-----|----|----|--------|-----------------------------------------------------------------------------------------------|---------|---------|--------|---|---------|--------|
| [P0A1E3]CYSK_SALTY Cysteine synthase A                           | 17 |                       | AAEIVASDPQKYLLQQFSNPANP<br>EIHEK    | 126 | 29 | 7  | 27.22  | b3b13y3y6y9y12°y12                                                                            | 3308.67 | 76.138  | 36056  | 4 | 827.92  | -3.91  |
| [P0A1E3]CYSK_SALTY Cysteine synthase A                           | 18 | Oxidation+M(5)        | LTLTMPETMSIERR                      | 87  | 14 | 3  | 19.29  | b11y9y11                                                                                      | 1693.86 | 77.723  | 5230   | 3 | 565.29  | -2.09  |
| [P0A1E3]CYSK_SALTY Cysteine synthase A                           | 19 |                       | LTMPETMSIER                         | 89  | 11 | 0  | 3.23   |                                                                                               | 1307.65 | 72.914  | 6680   | 3 | 436.55  | 9.43   |
| [P0A1E3]CYSK_SALTY Cysteine synthase A                           | 20 |                       | ALFADLFTEK                          | 309 | 10 | 0  | 3.64   |                                                                                               | 1154.62 | 102.536 | 1569   | 2 | 577.81  | 7.61   |
| [Q9ZF60]GLTI_SALTY Glutamate/aartate periplasmic-binding protein | 1  |                       | ESSVPFSYYDNQQK                      | 47  | 14 | 19 | 108.82 | b2°b2b3°b3b4y1y4y5y6°y6<br>*y6y7°y7y8y9y10°y10*y10<br>y14                                     | 1691.77 | 54.220  | 202343 | 2 | 846.39  | 6.21   |
| [Q9ZF60]GLTI_SALTY Glutamate/aartate periplasmic-binding protein | 2  |                       | VVGYSQDYSNAIVEAVKK                  | 61  | 18 | 16 | 152.76 | b1b2b11y2y3y4y5y6y7y8y<br>9y10y12y14y16y18                                                    | 1970.01 | 62.088  | 195512 | 3 | 657.34  | -5.76  |
| [Q9ZF60]GLTI_SALTY Glutamate/aartate periplasmic-binding protein | 3  |                       | VVGYSQDYSNAIVEAVK                   | 61  | 17 | 28 | 204.03 | b2b3b6b7b11*b11b13*b13<br>b14b16b17y2y3y4°y4y5y6y<br>10*y10y11*y11y12*y12y1<br>3*y13y14y15y17 | 1841.94 | 66.755  | 148968 | 2 | 921.47  | 5.90   |
| [Q9ZF60]GLTI_SALTY Glutamate/aartate periplasmic-binding protein | 4  |                       | AVAFMMDDALLAGER                     | 198 | 15 | 15 | 112.9  | b3b5y2y3°y3y5y6°y6y9y10<br>°y10y11y12y13°y13                                                  | 1609.78 | 83.529  | 124974 | 2 | 805.40  | 7.58   |
| [Q9ZF60]GLTI_SALTY Glutamate/aartate periplasmic-binding protein | 5  |                       | LIPITSQNR                           | 89  | 9  | 11 | 54.5   | b2y4*y4y5°y5y6°y6*y6y7*<br>y7y9                                                               | 1041.59 | 41.706  | 59335  | 2 | 521.30  | -12.07 |
| [Q9ZF60]GLTI_SALTY Glutamate/aartate periplasmic-binding protein | 6  | Carbamidomethyl+C(13) | IPLLQNGTFDFECGSTTNNLER              | 98  | 22 | 17 | 101.76 | b2b3b4b10b11b14°b14y1y<br>2y5y6y8y9°y9y10y11y22                                               | 2526.22 | 80.827  | 48671  | 2 | 1263.62 | 11.89  |
| [Q9ZF60]GLTI_SALTY Glutamate/aartate periplasmic-binding protein | 7  |                       | QAAFSDTIFVVGTR                      | 122 | 14 | 5  | 19.29  | b13y1y6y12y14                                                                                 | 1511.79 | 75.791  | 35927  | 2 | 756.40  | 4.68   |
| [Q9ZF60]GLTI_SALTY Glutamate/aartate periplasmic-binding protein | 8  |                       | LNKPDLQVK                           | 80  | 9  | 5  | 38.27  | y1y4y5y6y9                                                                                    | 1054.62 | 36.559  | 26369  | 2 | 527.81  | -4.40  |
| [Q9ZF60]GLTI_SALTY Glutamate/aartate periplasmic-binding protein | 9  | Carbamidomethyl+C(19) | KPDNWEIVGKPKQSQEAYGCMLR             | 217 | 22 | 5  | 26.92  | b7°b7b9y5y6                                                                                   | 2606.22 | 60.914  | 19115  | 4 | 652.31  | -9.37  |
| [Q9ZF60]GLTI_SALTY Glutamate/aartate periplasmic-binding protein | 10 |                       | LMDDTIAQAQTSGEAEK                   | 247 | 17 | 4  | 22.93  | b5b7y9y11                                                                                     | 1807.85 | 44.953  | 11018  | 2 | 904.43  | 8.64   |
| [Q9ZF60]GLTI_SALTY Glutamate/aartate periplasmic-binding protein | 11 |                       | NGVIVVGHR                           | 38  | 9  | 3  | 30.49  | b3y5y6                                                                                        | 950.54  | 31.667  | 147150 | 2 | 475.77  | -17.08 |
| [Q9ZF60]GLTI_SALTY Glutamate/aartate periplasmic-binding protein | 12 | Carbamidomethyl+C(22) | LIPITSQNRIPLLQNGTFDFECGSTT<br>NNLER | 89  | 31 | 12 | 72.91  | b3b14y4*y4y6y7y9y10y12<br>y14y21y29                                                           | 3548.80 | 86.044  | 224016 | 3 | 1183.61 | 6.67   |
| [Q9ZF60]GLTI_SALTY Glutamate/aartate periplasmic-binding protein | 13 |                       | GGDIKDFPDLK                         | 141 | 11 | 6  | 52.96  | b3b4b5°b5b7y10                                                                                | 1204.63 | 69.028  | 30410  | 2 | 602.82  | 10.13  |
| [Q9ZF60]GLTI_SALTY Glutamate/aartate periplasmic-binding protein | 14 |                       | VVGYSQDYSNAIVEAVKK                  | 61  | 18 | 8  | 40.68  | b5b13°b13b14b15°b15y15<br>*y15                                                                | 1970.04 | 93.045  | 12650  | 2 | 985.53  | 10.29  |
| [Q9ZF60]GLTI_SALTY Glutamate/aartate periplasmic-binding protein | 15 |                       | ALFKAPNDK                           | 290 | 9  | 4  | 30.49  | b8°b8y3y7                                                                                     | 1003.56 | 37.862  | 12482  | 2 | 502.28  | 1.28   |
| [Q9ZF60]GLTI_SALTY Glutamate/aartate periplasmic-binding protein | 16 |                       | KLMDDTIAQAQTSGEAEK                  | 246 | 18 | 3  | 22.98  | b6y5y6                                                                                        | 1935.92 | 58.944  | 1873   | 4 | 484.74  | -5.68  |



|                                                                 |    |                                              |                          |     |    |    |        |                                                                       |         |         |        |   |        |        |
|-----------------------------------------------------------------|----|----------------------------------------------|--------------------------|-----|----|----|--------|-----------------------------------------------------------------------|---------|---------|--------|---|--------|--------|
| Q9ZF60 GLTI_SALTY Glutamate/aartate periplasmic-binding protein | 17 | Carbamidomethyl+C(21)                        | AKKPDNWEIVGKPQSQEAYGCMLR | 215 | 24 | 4  | 23.43  | b9y5y12y13                                                            | 2805.39 | 58.385  | 1683   | 3 | 935.80 | 1.65   |
| Q9ZF60 GLTI_SALTY Glutamate/aartate periplasmic-binding protein | 18 | Phosphoryl STY(3)                            | IISAKDHGDSFR             | 180 | 12 | 6  | 62.61  | b3b6y3y4y8y9                                                          | 1425.65 | 29.731  | 3300   | 2 | 713.33 | 3.00   |
| Q9ZF60 GLTI_SALTY Glutamate/aartate periplasmic-binding protein | 19 | Carbamidomethyl+C(19)<br>;Phosphoryl STY(13) | KPDNWEIVGKPQSQEAYGCMLRK  | 217 | 23 | 3  | 23.14  | y7y9y10                                                               | 2814.32 | 118.783 | 1936   | 3 | 938.78 | 6.85   |
| Q9ZF60 GLTI_SALTY Glutamate/aartate periplasmic-binding protein | 20 | Carbamidomethyl+C(21)<br>;Oxidation+M(22)    | AKKPDNWEIVGKPQSQEAYGCMLR | 215 | 24 | 3  | 22     | b9y11y12                                                              | 2821.41 | 113.130 | 10797  | 3 | 941.14 | 10.38  |
| Q9ZF60 GLTI_SALTY Glutamate/aartate periplasmic-binding protein | 21 | Oxidation+M(2)                               | LMDDTIAQAQTSGEAEK        | 247 | 17 | 5  | 33.72  | y3y7y8°y8y11                                                          | 1823.86 | 55.560  | 4484   | 3 | 608.62 | 13.19  |
| Q9ZF60 GLTI_SALTY Glutamate/aartate periplasmic-binding protein | 22 |                                              | NKPDQLQVK                | 81  | 8  | 0  | 1.62   |                                                                       | 941.55  | 36.545  | 21374  | 2 | 471.28 | 5.38   |
| Q9ZF60 GLTI_SALTY Glutamate/aartate periplasmic-binding protein | 23 |                                              | PITSQNR                  | 91  | 7  | 0  | 1.62   |                                                                       | 815.43  | 41.711  | 13219  | 2 | 408.22 | -6.89  |
| Q9ZF60 GLTI_SALTY Glutamate/aartate periplasmic-binding protein | 24 |                                              | KPDNWEIVGKPQSQEA         | 217 | 16 | 2  | 21.27  | y8y9                                                                  | 1825.90 | 60.938  | 4109   | 2 | 913.45 | -6.15  |
| Q9ZF60 GLTI_SALTY Glutamate/aartate periplasmic-binding protein | 25 |                                              | GYSQDYSNAIVEAVKK         | 63  | 16 | 5  | 38.59  | b3b4b5b14°b14                                                         | 1771.89 | 62.120  | 3021   | 2 | 886.45 | 4.34   |
| P41031 CY_SALTY Thiosulfate-binding protein                     | 1  |                                              | FGSWPEVMK                | 311 | 9  | 8  | 64.71  | b2b3°b3y2y3y5y7y8                                                     | 1080.52 | 67.547  | 140552 | 2 | 540.76 | -0.68  |
| P41031 CY_SALTY Thiosulfate-binding protein                     | 2  |                                              | AYLNWLYSPQAQTIIITHYYR    | 265 | 21 | 27 | 192.23 | b2b3b4°b4b5°b5b6°b6b19y1y2y3y4y6°y6y7y8°y8y9y10y11y12y13°y13y14y16y21 | 2664.32 | 92.355  | 129290 | 3 | 888.78 | -1.37  |
| P41031 CY_SALTY Thiosulfate-binding protein                     | 3  |                                              | ELFAALNPPEQQWAK          | 37  | 16 | 25 | 143.27 | b2°b2b4b5°b5b6b7°b7y1y2y4°y4y5°y5y6y8°y8y9°y9y10°y10y12y13°y13y16     | 1888.97 | 89.030  | 105454 | 2 | 944.99 | 7.95   |
| P41031 CY_SALTY Thiosulfate-binding protein                     | 4  |                                              | LPNNSSPFYSTMGFLVR        | 110 | 17 | 15 | 108.86 | b7°b7b8°b8y2y3y4y5y9y11y12y13y14°y14y17                               | 1929.96 | 91.139  | 104247 | 2 | 965.49 | 5.69   |
| P41031 CY_SALTY Thiosulfate-binding protein                     | 5  |                                              | TEQFMTQFLK               | 179 | 10 | 19 | 88.54  | b1°b1b2°b2b3b4b10°b10y1y2y3y5y6y7y8°y8°y8y10°y10                      | 1272.63 | 74.383  | 103705 | 2 | 636.82 | -2.69  |
| P41031 CY_SALTY Thiosulfate-binding protein                     | 6  |                                              | GLGDVLISFESEVNNIRK       | 208 | 18 | 13 | 96.71  | b2b10b12y5y6y8°y8y10y11y12y13y16y18                                   | 1990.04 | 100.545 | 102487 | 3 | 664.02 | -9.75  |
| P41031 CY_SALTY Thiosulfate-binding protein                     | 7  |                                              | NVEVFDTGGR               | 189 | 10 | 7  | 68.12  | b2y4y5y6y7y8y10                                                       | 1093.53 | 45.970  | 78161  | 2 | 547.27 | -0.45  |
| P41031 CY_SALTY Thiosulfate-binding protein                     | 8  |                                              | QYEAQGFEVVIPK            | 226 | 13 | 12 | 34.07  | b2°b2b3°b3b13y1y2y6y8y11°y11y13                                       | 1507.78 | 68.825  | 77267  | 2 | 754.40 | 2.51   |
| P41031 CY_SALTY Thiosulfate-binding protein                     | 9  |                                              | QALAILQLK                | 71  | 10 | 10 | 88.54  | b3°b3b4°b4b10y3y5y6y7y8                                               | 1054.65 | 73.940  | 67834  | 2 | 527.83 | -10.07 |
| P41031 CY_SALTY Thiosulfate-binding protein                     | 10 |                                              | VNNPEIMGK                | 286 | 9  | 9  | 67.72  | b2y2y3y4y6y7°y7y8y9                                                   | 1001.50 | 35.035  | 66943  | 2 | 501.25 | -6.34  |
| P41031 CY_SALTY Thiosulfate-binding protein                     | 11 |                                              | LIFPNPK                  | 146 | 7  | 7  | 50.68  | b5y2y4°y4y5y6y7                                                       | 828.49  | 54.674  | 58144  | 2 | 414.75 | -9.80  |
| P41031 CY_SALTY Thiosulfate-binding protein                     | 12 |                                              | NIHDWSDLVR               | 132 | 10 | 6  | 28.67  | b7b8y1y8°y8y10                                                        | 1254.62 | 61.900  | 57176  | 2 | 627.82 | 1.85   |
| P41031 CY_SALTY Thiosulfate-binding protein                     | 13 |                                              | GLGDVLISFESEVNNIR        | 208 | 17 | 3  | 24.97  | y7y10y11                                                              | 1861.97 | 106.572 | 22018  | 2 | 931.49 | 5.05   |

|                                              |    |                       |                               |     |    |    |        |                                                                       |         |         |        |   |         |        |
|----------------------------------------------|----|-----------------------|-------------------------------|-----|----|----|--------|-----------------------------------------------------------------------|---------|---------|--------|---|---------|--------|
| [P41031 CY_SALTY Thiosulfate-binding protein | 14 |                       | GATTTFAER                     | 199 | 9  | 5  | 64.71  | b3y3y4y6y7                                                            | 953.46  | 29.697  | 20447  | 2 | 477.23  | -7.55  |
| [P41031 CY_SALTY Thiosulfate-binding protein | 15 |                       | ADVVTYNQVTDVQILHDK            | 81  | 18 | 6  | 26.58  | b2b3b4b6y10y18                                                        | 2058.04 | 62.651  | 16036  | 3 | 686.69  | -4.51  |
| [P41031 CY_SALTY Thiosulfate-binding protein | 16 |                       | TN1LAEFPVAWVDK                | 239 | 14 | 13 | 60.41  | b2°b2b13y2y4y5°y5y8y9y10°y10y14*y14                                   | 1602.86 | 96.501  | 13128  | 2 | 801.93  | 1.60   |
| [P41031 CY_SALTY Thiosulfate-binding protein | 17 |                       | ELFAALNPPFEQQWAKDNGGDK        | 37  | 22 | 3  | 13.44  | b11y3y12                                                              | 2475.22 | 102.015 | 1612   | 2 | 1238.11 | 9.96   |
| [P41031 CY_SALTY Thiosulfate-binding protein | 18 |                       | TN1LAEFPVAWVDKNVQANGTEK       | 239 | 23 | 17 | 153.82 | b3°b3b4y4y5y6°y6y7*y7y8y9y10y13y16y18y19y20                           | 2544.31 | 89.767  | 146877 | 3 | 848.77  | 0.29   |
| [P41031 CY_SALTY Thiosulfate-binding protein | 19 |                       | YTYLAAWGAADNADGGDKAK          | 159 | 20 | 10 | 62.99  | b3°b3b5°b5y9y11y12y13y16y18                                           | 2057.95 | 60.900  | 74329  | 3 | 686.66  | -2.85  |
| [P41031 CY_SALTY Thiosulfate-binding protein | 20 |                       | VEEKFGSWPEVMK                 | 307 | 13 | 3  | 20.64  | b8b10y8                                                               | 1565.76 | 49.818  | 11680  | 2 | 783.38  | -5.93  |
| [P41031 CY_SALTY Thiosulfate-binding protein | 21 |                       | NVEVFDTGGRGATTTFAER           | 189 | 19 | 3  | 14.94  | b5y3y10                                                               | 2027.97 | 55.374  | 7263   | 3 | 676.66  | -3.01  |
| [P41031 CY_SALTY Thiosulfate-binding protein | 22 |                       | VNNPEIMGKQADK                 | 286 | 13 | 3  | 28.12  | b6b7b12                                                               | 1443.72 | 63.589  | 1646   | 2 | 722.36  | -3.64  |
| [P41031 CY_SALTY Thiosulfate-binding protein | 23 | Oxidation+M(8)        | RPLTLAAMLLLAGQAQATELLNSYDVSR  | 8   | 29 | 3  | 17.49  | y9y12y15                                                              | 3118.64 | 97.306  | 5242   | 4 | 780.42  | -4.93  |
| [P41031 CY_SALTY Thiosulfate-binding protein | 24 | Oxidation+M(12)       | LPNNSSPFYSTMGFLVR             | 110 | 17 | 4  | 23.31  | b4b5y11°y11                                                           | 1945.95 | 95.011  | 2509   | 2 | 973.48  | 0.88   |
| [P41031 CY_SALTY Thiosulfate-binding protein | 25 |                       | EVFDTGGR                      | 191 | 8  | 0  | 2.02   |                                                                       | 880.41  | 45.962  | 3709   | 1 | 880.41  | -8.94  |
| [P41031 CY_SALTY Thiosulfate-binding protein | 26 |                       | GATTTFAER                     | 199 | 9  | 0  | 1.62   |                                                                       | 935.45  | 29.714  | 12529  | 2 | 468.23  | 1.04   |
| [P41031 CY_SALTY Thiosulfate-binding protein | 27 |                       | QALAILQGLK                    | 71  | 10 | 0  | 2.02   |                                                                       | 1037.63 | 73.937  | 2022   | 2 | 519.32  | 2.12   |
| [P0A1D3 CH60_SALTY 60 kDa chaperonin         | 1  |                       | GYLSPYFINKPETGAVELESPFILLADKK | 197 | 29 | 27 | 210.2  | b2b3b4°b4b6°b6b11*b11b12y1y2y3y4y5y6y7y8y9y10y11y12y13y19y25y26y27y29 | 3239.70 | 94.917  | 317889 | 4 | 810.68  | -6.63  |
| [P0A1D3 CH60_SALTY 60 kDa chaperonin         | 2  |                       | EMLPVLEAVAK                   | 231 | 11 | 13 | 100.41 | b2°b2b3y1y2y3y4y5y6y7y8y9y11                                          | 1199.66 | 79.122  | 148727 | 2 | 600.34  | -5.09  |
| [P0A1D3 CH60_SALTY 60 kDa chaperonin         | 3  |                       | ANDAAGDGTTTATVLAQSIIIEGLK     | 80  | 25 | 21 | 160.45 | b2°b2b3°b3b4°b4b5°b5b6y1y3y4y5y6y7y8y9y10y11y15y25                    | 2418.23 | 91.274  | 139743 | 3 | 806.75  | -3.33  |
| [P0A1D3 CH60_SALTY 60 kDa chaperonin         | 4  | Carbamidomethyl+C(18) | SALQYAASVAGLMITTECMVTDLPK     | 501 | 25 | 19 | 134.4  | b3b4b5°b5b10°b10y2y3y4y5y8y9°y9y10y11°y11y12y13y25                    | 2670.32 | 123.976 | 127645 | 3 | 890.78  | -0.46  |
| [P0A1D3 CH60_SALTY 60 kDa chaperonin         | 5  | Carbamidomethyl+C(6)  | QIVLNCGEEPSVVANTVK            | 452 | 18 | 14 | 134.91 | b9°b9b13y3y4y5y6y11y12y13y14y15y16y18                                 | 1957.02 | 60.627  | 104998 | 2 | 979.01  | 6.11   |
| [P0A1D3 CH60_SALTY 60 kDa chaperonin         | 6  |                       | AVAAAVEELK                    | 122 | 10 | 13 | 100    | b2b3b5y2y3°y3y4°y4y5y6y7y8y10                                         | 1000.56 | 46.161  | 104482 | 2 | 500.78  | -9.09  |
| [P0A1D3 CH60_SALTY 60 kDa chaperonin         | 7  |                       | QQIEEATSDYDREK                | 350 | 14 | 14 | 113.08 | b7b14y3y5y6°y6y7y8y9y10°y10y12y14*y14                                 | 1711.76 | 32.374  | 89879  | 3 | 571.26  | -12.27 |
| [P0A1D3 CH60_SALTY 60 kDa chaperonin         | 8  |                       | GVNVLADAVK                    | 18  | 10 | 5  | 33.9   | b2y5y6y8y10                                                           | 985.56  | 54.844  | 86686  | 2 | 493.28  | -10.22 |
| [P0A1D3 CH60_SALTY 60 kDa chaperonin         | 9  |                       | LAGGVAVIK                     | 371 | 9  | 4  | 30.49  | b5b6y7y9                                                              | 827.52  | 43.932  | 78980  | 2 | 414.27  | -14.01 |
| [P0A1D3 CH60_SALTY 60 kDa chaperonin         | 10 |                       | SFGAPTITK                     | 42  | 9  | 9  | 53.25  | b2b3°b3y1y2y3y5y7y9                                                   | 921.50  | 43.754  | 74311  | 2 | 461.25  | -7.75  |
| [P0A1D3 CH60_SALTY 60 kDa chaperonin         | 11 |                       | VVINKDTTTIIDGVGEEAAIQGR       | 322 | 23 | 7  | 28.81  | y2y3y5y6y8*y8y23                                                      | 2399.28 | 66.463  | 73283  | 3 | 800.43  | 0.51   |
| [P0A1D3 CH60_SALTY 60 kDa chaperonin         | 12 | Carbamidomethyl+C(6)  | ALSVPCCDSK                    | 132 | 10 | 12 | 74.35  | b1b2b3°b3y2y4y5y6°y6y7y8y10                                           | 1063.51 | 34.150  | 68469  | 2 | 532.26  | -3.44  |

|                                      |    |                       |                                      |     |    |    |        |                                            |         |         |        |   |         |        |
|--------------------------------------|----|-----------------------|--------------------------------------|-----|----|----|--------|--------------------------------------------|---------|---------|--------|---|---------|--------|
| IP0A1D3 CH60_SALTY 60 kDa chaperonin | 13 |                       | GGDGNYGYNAAATEEYGNMIDMG ILDPTK       | 470 | 28 | 10 | 57.28  | y2y3y4y5y7y8y12*y12y14y28                  | 2966.32 | 87.469  | 53203  | 2 | 1483.66 | 13.25  |
| IP0A1D3 CH60_SALTY 60 kDa chaperonin | 14 |                       | VEDALHATR                            | 395 | 9  | 8  | 74.92  | b2b4y3y4y5y6y7y9                           | 1011.51 | 25.200  | 46201  | 2 | 506.26  | -9.90  |
| IP0A1D3 CH60_SALTY 60 kDa chaperonin | 15 |                       | AIAQVGTISANSDETGVGK                  | 142 | 18 | 10 | 76.66  | b7y4y8y9y10*y10y11y13y14y18                | 1760.91 | 47.318  | 45740  | 2 | 880.96  | 7.07   |
| IP0A1D3 CH60_SALTY 60 kDa chaperonin | 16 |                       | AVAAGMNPMDLK                         | 105 | 12 | 13 | 100.14 | b2b3y2y4y5*y5y6*y6y7y8y9y10y12             | 1217.60 | 57.222  | 39304  | 2 | 609.30  | -1.80  |
| IP0A1D3 CH60_SALTY 60 kDa chaperonin | 17 |                       | AVAAGMNPMDLKR                        | 105 | 13 | 17 | 119.42 | b2b3b6b8y2y3y6*y6y7*y7y8*y8y9y10*y10y11y13 | 1373.71 | 49.635  | 35505  | 2 | 687.36  | 1.60   |
| IP0A1D3 CH60_SALTY 60 kDa chaperonin | 18 |                       | GQNEDQNVGIK                          | 430 | 11 | 6  | 31.29  | b2*b2y3y4y9y11                             | 1201.58 | 26.051  | 26595  | 2 | 601.29  | -4.06  |
| IP0A1D3 CH60_SALTY 60 kDa chaperonin | 19 |                       | ATLEDLGQAKR                          | 311 | 11 | 8  | 52.96  | b2b7y5y7y8*y8y9y11                         | 1201.65 | 37.967  | 21378  | 2 | 601.33  | -2.23  |
| IP0A1D3 CH60_SALTY 60 kDa chaperonin | 20 |                       | GYLSPYFINKPETGAVELESPFILL ADK        | 197 | 28 | 5  | 17.32  | b2b3b5b9y4                                 | 3111.64 | 101.643 | 12528  | 3 | 1037.89 | 4.86   |
| IP0A1D3 CH60_SALTY 60 kDa chaperonin | 21 |                       | SFGAPTITKDGVSVAREIELEDK              | 42  | 23 | 4  | 13.05  | b5y2y6y11                                  | 2462.27 | 93.855  | 4556   | 3 | 821.43  | -4.07  |
| IP0A1D3 CH60_SALTY 60 kDa chaperonin | 22 |                       | FENMGAQMVKEVASK                      | 65  | 15 | 3  | 18.14  | b10b14y14                                  | 1668.82 | 72.153  | 1586   | 3 | 556.94  | 6.14   |
| IP0A1D3 CH60_SALTY 60 kDa chaperonin | 23 |                       | DGVSVAREIELEDK                       | 51  | 14 | 3  | 34.85  | y3y4y5                                     | 1559.77 | 32.512  | 1556   | 3 | 520.59  | -14.48 |
| IP0A1D3 CH60_SALTY 60 kDa chaperonin | 24 |                       | AMEAPLR                              | 445 | 7  | 4  | 37.46  | b4y4y5*y5                                  | 787.40  | 35.772  | 25327  | 2 | 394.21  | -11.94 |
| IP0A1D3 CH60_SALTY 60 kDa chaperonin | 25 |                       | ATLEDLGQAK                           | 311 | 10 | 3  | 36.91  | b5b6b7                                     | 1045.55 | 19.598  | 11425  | 2 | 523.28  | 1.63   |
| IP0A1D3 CH60_SALTY 60 kDa chaperonin | 26 |                       | APGFGDR                              | 277 | 7  | 4  | 50.68  | b4y4y5y6                                   | 719.34  | 26.691  | 7742   | 2 | 360.17  | -6.70  |
| IP0A1D3 CH60_SALTY 60 kDa chaperonin | 27 |                       | FGNDAR                               | 7   | 6  | 4  | 43.08  | b3y3y5*y5                                  | 679.32  | 75.539  | 2126   | 1 | 679.32  | 7.82   |
| IP0A1D3 CH60_SALTY 60 kDa chaperonin | 28 |                       | VGAATEVEMK                           | 380 | 10 | 5  | 39.34  | b4b9*b9y4y6                                | 1034.50 | 122.316 | 1966   | 1 | 1034.50 | -17.46 |
| IP0A1D3 CH60_SALTY 60 kDa chaperonin | 29 |                       | EIELEDKFENMGAQMVK                    | 58  | 17 | 9  | 56.85  | b3*b3b8b9*b9y5y7y10y13                     | 2010.93 | 72.346  | 197535 | 3 | 670.98  | -8.50  |
| IP0A1D3 CH60_SALTY 60 kDa chaperonin | 30 |                       | IADLKGQNEDQNVGIK                     | 425 | 16 | 11 | 89.12  | b3b10y3y4y8*y8y9y10y11*y11y14              | 1741.89 | 38.778  | 122179 | 3 | 581.30  | -9.88  |
| IP0A1D3 CH60_SALTY 60 kDa chaperonin | 31 |                       | AMLQDIATLTGGTVISEEIGMELE KATLEDLGQAK | 286 | 35 | 8  | 41.34  | b3b6b7y4y5y7y21y25                         | 3675.88 | 121.707 | 23433  | 3 | 1225.97 | 3.52   |
| IP0A1D3 CH60_SALTY 60 kDa chaperonin | 32 |                       | AIAQVGTISANSDETGVGLIAEAM DK          | 142 | 26 | 4  | 22.81  | y3y4y8*y8                                  | 2632.35 | 90.870  | 9482   | 3 | 878.12  | 1.58   |
| IP0A1D3 CH60_SALTY 60 kDa chaperonin | 33 | Carbamidomethyl+C(16) | AVAAAVEELKALSVPSCDSK                 | 122 | 20 | 3  | 14.37  | b5y12y16                                   | 2045.04 | 83.524  | 6240   | 2 | 1023.02 | -9.85  |
| IP0A1D3 CH60_SALTY 60 kDa chaperonin | 34 |                       | DGVSVAREIELEDK                       | 51  | 14 | 4  | 24.73  | b12b13*b13y10                              | 1559.77 | 77.297  | 2323   | 2 | 780.39  | -13.54 |
| IP0A1D3 CH60_SALTY 60 kDa chaperonin | 35 | Oxidation+M(9)        | AVAAGMNPMDLKR                        | 105 | 13 | 4  | 25.41  | b6b7y7*y7                                  | 1389.70 | 24.944  | 91943  | 3 | 463.90  | 1.67   |
| IP0A1D3 CH60_SALTY 60 kDa chaperonin | 36 | Oxidation+M(22)       | EGVITVEDGTGLQDEL DVVEGMQ FDR         | 171 | 26 | 3  | 12.14  | b3b10y3                                    | 2867.33 | 112.859 | 73946  | 3 | 956.45  | 0.60   |
| IP0A1D3 CH60_SALTY 60 kDa chaperonin | 37 |                       | AAGMNPMDLKR                          | 107 | 11 | 2  | 21.22  | b3b4                                       | 1203.60 | 49.644  | 36578  | 2 | 602.30  | 1.62   |
| IP0A1D3 CH60_SALTY 60 kDa chaperonin | 38 |                       | EDALHATR                             | 396 | 8  | 1  | 8.82   | b5                                         | 912.45  | 25.255  | 29188  | 2 | 456.73  | -6.09  |
| IP0A1D3 CH60_SALTY 60 kDa chaperonin | 39 |                       | AAAVEELK                             | 124 | 8  | 2  | 8.25   | b6*b6                                      | 830.46  | 46.159  | 15219  | 1 | 830.46  | -5.81  |
| IP0A1D3 CH60_SALTY 60 kDa chaperonin | 40 |                       | AGMNPMDLKR                           | 108 | 10 | 3  | 7.42   | b9*b9*b9                                   | 1132.56 | 49.604  | 6278   | 2 | 566.78  | -1.29  |
| IP0A1D3 CH60_SALTY 60 kDa chaperonin | 41 |                       | MNPMDLK                              | 110 | 7  | 0  | 2.83   |                                            | 848.39  | 57.227  | 4055   | 2 | 424.70  | -10.07 |

|                                                            |    |                      |                                            |     |    |    |        |                                                                       |         |        |        |   |         |        |
|------------------------------------------------------------|----|----------------------|--------------------------------------------|-----|----|----|--------|-----------------------------------------------------------------------|---------|--------|--------|---|---------|--------|
| P0A1D3 CH60_SALTY 60 kDa chaperonin                        | 42 | Carbamidomethyl+C(4) | SVPCSDSK                                   | 134 | 8  | 0  | 2.02   |                                                                       | 879.39  | 34.157 | 2377   | 1 | 879.39  | 6.59   |
| P0A1D3 CH60_SALTY 60 kDa chaperonin                        | 43 |                      | DGVSVAREI                                  | 51  | 9  | 0  | 3.64   |                                                                       | 945.51  | 32.571 | 2303   | 2 | 473.26  | 8.07   |
| P0A1D3 CH60_SALTY 60 kDa chaperonin                        | 44 |                      | QQIEEATSDYDREK                             | 350 | 14 | 0  | 3.64   |                                                                       | 1694.75 | 32.350 | 2893   | 3 | 565.59  | -0.43  |
| P0A1D3 CH60_SALTY 60 kDa chaperonin                        | 45 | Carbamidomethyl+C(6) | ALSVPCSDSK                                 | 132 | 10 | 0  | 2.02   |                                                                       | 1045.50 | 34.089 | 1647   | 2 | 523.25  | 4.90   |
| P06202 OPPA_SALTY Periplasmic oligopeptide-binding protein | 1  |                      | LADPNTASPYASYLQYGHIANIDD<br>IIAGKKPATDLGVK | 125 | 38 | 23 | 76.86  | b1b2b3b6°b6°b6b7°b7°b7<br>b10°b10b11b13b20y2y3y4<br>y8y12y22y27y31y38 | 4001.03 | 82.284 | 172831 | 5 | 801.01  | -9.15  |
| P06202 OPPA_SALTY Periplasmic oligopeptide-binding protein | 2  |                      | LVEPEWFK                                   | 352 | 8  | 10 | 67.31  | y2y3y4°y4y5°y5y6°y6y7y8                                               | 1047.55 | 69.955 | 137902 | 2 | 524.28  | -5.48  |
| P06202 OPPA_SALTY Periplasmic oligopeptide-binding protein | 3  |                      | AEQQLDKDSAIVPVYYVYNAR                      | 494 | 21 | 15 | 129.93 | b3b4b5b10°b10b11b12y3y<br>5y7y9y11y12y20y21                           | 2442.23 | 71.949 | 127785 | 3 | 814.75  | -1.80  |
| P06202 OPPA_SALTY Periplasmic oligopeptide-binding protein | 4  | Carbamidomethyl+C(4) | AGWCADYNEPTSFLNTMLSDSSN<br>NTAHYK          | 439 | 29 | 9  | 62.83  | b4b5y2y11y12y13y20y21y<br>29                                          | 3294.43 | 89.230 | 115999 | 3 | 1098.82 | 7.41   |
| P06202 OPPA_SALTY Periplasmic oligopeptide-binding protein | 5  |                      | WSDGTPVTAHDFVYSWQR                         | 107 | 18 | 15 | 111.55 | b2b3°b3y3*y3y4y5y7y8y10<br>°y10y11y13y17y18                           | 2151.99 | 71.233 | 105589 | 3 | 718.00  | -1.36  |
| P06202 OPPA_SALTY Periplasmic oligopeptide-binding protein | 6  |                      | TVINQVTYLPISSEVTDVNR                       | 241 | 20 | 20 | 106.29 | b2°b2b9y2*y2y3y4y5*y5y6<br>y9*y9y11*y11y12*y12y13<br>y14°y14y20       | 2248.20 | 76.236 | 87001  | 2 | 1124.60 | 7.49   |
| P06202 OPPA_SALTY Periplasmic oligopeptide-binding protein | 7  |                      | SGEIDMTYNNMPIELFQK                         | 263 | 18 | 14 | 54.16  | b2b3b5b13b15°b15y1y2*y<br>2y3y10y11y12°y18                            | 2130.01 | 85.765 | 84300  | 2 | 1065.51 | 9.74   |
| P06202 OPPA_SALTY Periplasmic oligopeptide-binding protein | 8  |                      | NQGDLPAYSYTPPYTDGAK                        | 333 | 19 | 9  | 50.05  | b5b10b11°b11°b11y8y11y<br>12y14                                       | 2057.97 | 57.930 | 80631  | 2 | 1029.49 | 10.32  |
| P06202 OPPA_SALTY Periplasmic oligopeptide-binding protein | 9  |                      | ALDDHTFEVTLSEPVYFYK                        | 163 | 20 | 13 | 89.28  | b6b7b9b10°b10b12b13y4y<br>5y7y9°y9y20                                 | 2371.15 | 85.241 | 73060  | 3 | 791.06  | 1.34   |
| P06202 OPPA_SALTY Periplasmic oligopeptide-binding protein | 10 |                      | NLGVNVNLENQEWK                             | 410 | 14 | 15 | 108.82 | b1b2b3b4y3y4y7y8*y8y10<br>*y10y11y12*y12y14                           | 1656.84 | 65.681 | 55219  | 2 | 828.92  | 2.95   |
| P06202 OPPA_SALTY Periplasmic oligopeptide-binding protein | 11 |                      | HQGTFDVAR                                  | 430 | 9  | 4  | 30.49  | b2b3b7y7                                                              | 1030.50 | 31.137 | 41558  | 2 | 515.75  | -4.15  |
| P06202 OPPA_SALTY Periplasmic oligopeptide-binding protein | 12 |                      | LADPNTASPYASYLQYGHIANIDD<br>IIAGK          | 125 | 29 | 8  | 25.13  | b3b4b28y1y2y3y10y29                                                   | 3091.56 | 87.444 | 38537  | 3 | 1031.19 | 5.84   |
| P06202 OPPA_SALTY Periplasmic oligopeptide-binding protein | 13 |                      | DLFEGLLISDVEGHPSPGVAEK                     | 67  | 22 | 7  | 30.67  | b2b6y3y6y15y19y22                                                     | 2309.17 | 88.328 | 21794  | 3 | 770.39  | 0.42   |
| P06202 OPPA_SALTY Periplasmic oligopeptide-binding protein | 14 |                      | DPLDNIYVK                                  | 527 | 9  | 4  | 30.49  | b3b4y3y9                                                              | 1076.57 | 68.981 | 12224  | 2 | 538.79  | 4.65   |
| P06202 OPPA_SALTY Periplasmic oligopeptide-binding protein | 15 |                      | NPQYWDNAK                                  | 232 | 9  | 4  | 30.49  | b3y3y6°y6                                                             | 1135.52 | 38.316 | 47719  | 2 | 568.26  | 1.40   |
| P06202 OPPA_SALTY Periplasmic oligopeptide-binding protein | 16 |                      | LIADTLK                                    | 474 | 7  | 3  | 40.47  | b6y3y5                                                                | 773.47  | 42.290 | 14192  | 2 | 387.24  | -15.07 |

|                                                            |    |                       |                               |     |    |    |        |                                                         |         |         |        |   |         |        |
|------------------------------------------------------------|----|-----------------------|-------------------------------|-----|----|----|--------|---------------------------------------------------------|---------|---------|--------|---|---------|--------|
| P06202 OPPA_SALTY Periplasmic oligopeptide-binding protein | 17 |                       | IVLER                         | 227 | 5  | 1  | 13.22  | y4                                                      | 629.39  | 32.558  | 11531  | 1 | 629.39  | -13.58 |
| P06202 OPPA_SALTY Periplasmic oligopeptide-binding protein | 18 |                       | TFLDTR                        | 424 | 6  | 2  | 13.62  | y4°y4                                                   | 752.38  | 35.719  | 8116   | 1 | 752.38  | -14.52 |
| P06202 OPPA_SALTY Periplasmic oligopeptide-binding protein | 19 |                       | NWVVNER                       | 220 | 7  | 4  | 40.47  | b3b6y3*y3                                               | 916.48  | 37.865  | 2470   | 2 | 458.75  | 21.78  |
| P06202 OPPA_SALTY Periplasmic oligopeptide-binding protein | 20 |                       | SELYAK                        | 488 | 6  | 2  | 26.85  | b4b5                                                    | 710.38  | 36.186  | 2208   | 1 | 710.38  | 11.08  |
| P06202 OPPA_SALTY Periplasmic oligopeptide-binding protein | 21 | Carbamidomethyl+C(13) | EIPNEVRVDPYLCTYYYEINNQK       | 284 | 23 | 9  | 33.91  | b4b9°b9*b9y7y8y14°y14y21                                | 2920.40 | 75.210  | 55526  | 3 | 974.14  | 4.85   |
| P06202 OPPA_SALTY Periplasmic oligopeptide-binding protein | 22 |                       | VKNQGDLPAYSYTPPYTDGAK         | 331 | 21 | 6  | 29.76  | b6b12y8y9°y9y13                                         | 2285.08 | 68.147  | 47490  | 4 | 572.02  | -14.32 |
| P06202 OPPA_SALTY Periplasmic oligopeptide-binding protein | 23 |                       | NPQYWDNAKTVINQVTYLPISSEVTDVNR | 232 | 29 | 4  | 24.93  | b3b22y11y12                                             | 3364.72 | 101.106 | 34375  | 3 | 1122.24 | 10.52  |
| P06202 OPPA_SALTY Periplasmic oligopeptide-binding protein | 24 |                       | TVINQVTYLPISSEVTDVNR          | 241 | 22 | 4  | 29.75  | y9y13y16y20                                             | 2567.35 | 76.123  | 26973  | 3 | 856.45  | 0.86   |
| P06202 OPPA_SALTY Periplasmic oligopeptide-binding protein | 25 |                       | NNGSEVQSLDPHKIEGVPE\$NVS\$R   | 43  | 24 | 10 | 28.74  | b7y4*y4y6*y6y10°y10*y10y11*y11                          | 2592.27 | 116.643 | 22098  | 3 | 864.76  | 0.19   |
| P06202 OPPA_SALTY Periplasmic oligopeptide-binding protein | 26 | Carbamidomethyl+C(6)  | VDPYLCTYYYEINNQKAPFNDVR       | 291 | 23 | 4  | 23.8   | b9y4y5y12                                               | 2882.35 | 75.340  | 16184  | 3 | 961.46  | 2.54   |
| P06202 OPPA_SALTY Periplasmic oligopeptide-binding protein | 27 |                       | IVLERNPQYWDNAK                | 227 | 14 | 3  | 19.29  | b8y6y12                                                 | 1745.88 | 52.140  | 11767  | 3 | 582.63  | -11.54 |
| P06202 OPPA_SALTY Periplasmic oligopeptide-binding protein | 28 |                       | LKNWVVNER                     | 218 | 9  | 7  | 45.47  | b4*b4y4*y4y5y7°y7                                       | 1157.63 | 43.559  | 11578  | 2 | 579.32  | -8.12  |
| P06202 OPPA_SALTY Periplasmic oligopeptide-binding protein | 29 |                       | NQGDLPAYSYTPPYTDGAKLVEPEWFK   | 333 | 27 | 3  | 11.91  | b7y4y6                                                  | 3086.49 | 90.687  | 7992   | 3 | 1029.50 | 4.59   |
| P06202 OPPA_SALTY Periplasmic oligopeptide-binding protein | 30 |                       | LVEPEWFKWSQQK                 | 352 | 13 | 5  | 34.07  | b7b9°b9b12y8                                            | 1704.87 | 83.482  | 5756   | 2 | 852.94  | -4.58  |
| P06202 OPPA_SALTY Periplasmic oligopeptide-binding protein | 31 |                       | TFLDTRHQGTFDVAR               | 424 | 15 | 3  | 18.14  | b4y5y8                                                  | 1763.91 | 74.584  | 4406   | 2 | 882.46  | 13.08  |
| P06202 OPPA_SALTY Periplasmic oligopeptide-binding protein | 32 |                       | LADPNTASPYASYLQYGHIANIDDIAG   | 125 | 28 | 0  | 13.34  |                                                         | 2963.44 | 82.259  | 4591   | 3 | 988.48  | -0.99  |
| P06202 OPPA_SALTY Periplasmic oligopeptide-binding protein | 33 |                       | VEGHPSPGVAEK                  | 77  | 12 | 0  | 6.87   |                                                         | 1206.62 | 88.319  | 1789   | 2 | 603.81  | 7.49   |
| P65702 PGK_SALTY Phohoglycerate kinase                     | 1  | Carbamidomethyl+C(6)  | FADVACAGPLLAELDALGK           | 156 | 20 | 22 | 178.35 | b2b3b4b5°b5b7b8b12b13b14b15°b15y2y3y4y5y8y9y13y15y16y20 | 2002.05 | 98.217  | 208442 | 2 | 1001.53 | 7.80   |
| P65702 PGK_SALTY Phohoglycerate kinase                     | 2  |                       | VLPAVAMLEER                   | 373 | 11 | 14 | 111.41 | b1b2b3b5y2°y2y3y4y5y6y7y8y9y11                          | 1227.67 | 79.101  | 196666 | 2 | 614.34  | -2.59  |

|                                        |    |                                       |                               |     |    |    |        |                                                                        |         |         |        |   |        |        |
|----------------------------------------|----|---------------------------------------|-------------------------------|-----|----|----|--------|------------------------------------------------------------------------|---------|---------|--------|---|--------|--------|
| P65702 PGK_SALTY Phohoglycerate kinase | 3  |                                       | SVNDVKEDEQILDIGDASAQQLAE ILK  | 272 | 27 | 26 | 150.7  | b1b2b4b5*b5b7b11b12b13°b13b14*b14b24*b24b25y1y2y3y4y5y6y10y12y13y16y27 | 2941.51 | 99.410  | 193624 | 3 | 981.18 | 3.73   |
| P65702 PGK_SALTY Phohoglycerate kinase | 4  |                                       | VMVTSHLGRPTEGEYNEEFSLPV VNYLK | 53  | 29 | 9  | 49.17  | b2b13b16b17b18y2y7y8y29                                                | 3321.66 | 91.518  | 191698 | 4 | 831.17 | -7.79  |
| P65702 PGK_SALTY Phohoglycerate kinase | 5  | Carbamidomethyl+C(5)                  | LLTTCDIPVPTDVR                | 244 | 14 | 17 | 139.73 | b2b6b7°b7b9b12b13y2y5y7y8y9y10y11y12°y12y14                            | 1599.85 | 67.627  | 126879 | 2 | 800.43 | 6.10   |
| P65702 PGK_SALTY Phohoglycerate kinase | 6  |                                       | VATEFSETAPATLK                | 258 | 14 | 16 | 111.83 | b1b2b3°b3b4°b4b6y1y5y6y7y9y10y11y12y14                                 | 1464.76 | 51.366  | 99680  | 2 | 732.88 | 0.25   |
| P65702 PGK_SALTY Phohoglycerate kinase | 7  |                                       | SLYEADLVDEAKR                 | 231 | 13 | 11 | 92.77  | b2°b2y1y2y4y5y6y8y9y10y11                                              | 1508.74 | 52.900  | 99093  | 3 | 503.59 | -11.33 |
| P65702 PGK_SALTY Phohoglycerate kinase | 8  |                                       | TILWNGPVGVFEPNFR              | 302 | 17 | 19 | 152.4  | b2b6°b6b12°b12b13y3y4y5y6°y6y7*y7y10y11y12y13y14y17                    | 1993.05 | 105.610 | 90579  | 2 | 997.03 | 8.64   |
| P65702 PGK_SALTY Phohoglycerate kinase | 9  |                                       | ASLPTIELALK                   | 38  | 11 | 4  | 31.29  | y3y7y8y11                                                              | 1155.69 | 76.291  | 73636  | 2 | 578.35 | -6.55  |
| P65702 PGK_SALTY Phohoglycerate kinase | 10 |                                       | ADLNPVKEGK                    | 19  | 11 | 10 | 99.16  | b3b5b9y2y3y4y6y7y8y11                                                  | 1169.66 | 35.712  | 71170  | 2 | 585.33 | 2.71   |
| P65702 PGK_SALTY Phohoglycerate kinase | 11 |                                       | LVKDYLDGVDV AEGELV VLENV R    | 90  | 23 | 7  | 28.81  | y2y4*y4y6y14y16y23                                                     | 2544.36 | 96.325  | 59473  | 3 | 848.79 | 1.54   |
| P65702 PGK_SALTY Phohoglycerate kinase | 12 |                                       | MTDLDLAGKR                    | 5   | 10 | 6  | 71.13  | b2y3y4y5y7y9                                                           | 1119.58 | 41.454  | 39049  | 2 | 560.29 | -3.93  |
| P65702 PGK_SALTY Phohoglycerate kinase | 13 |                                       | IADQLIVGGGIANTFVAAQGHSVG K    | 206 | 25 | 6  | 25.85  | b4°b4b5y2y14y19                                                        | 2423.29 | 77.212  | 36581  | 3 | 808.43 | -5.84  |
| P65702 PGK_SALTY Phohoglycerate kinase | 14 |                                       | TILWNGPVGVFEPNFRK             | 302 | 18 | 7  | 24.82  | b1b2b14y10y12y16y18                                                    | 2121.12 | 95.959  | 26527  | 3 | 707.71 | -4.49  |
| P65702 PGK_SALTY Phohoglycerate kinase | 15 |                                       | SLYEADLVDEAK                  | 231 | 12 | 6  | 32.19  | b5b10y4°y4y10y12                                                       | 1352.67 | 57.100  | 14212  | 2 | 676.84 | 6.32   |
| P65702 PGK_SALTY Phohoglycerate kinase | 16 |                                       | AQASTHGIGK                    | 146 | 10 | 9  | 61.13  | b1b3b5b7°b7b8°b8y2y4                                                   | 969.50  | 22.003  | 6858   | 2 | 485.25 | -12.59 |
| P65702 PGK_SALTY Phohoglycerate kinase | 17 |                                       | LTVLDSLK                      | 197 | 9  | 3  | 38.27  | y5y6y8                                                                 | 975.56  | 60.704  | 69189  | 2 | 488.29 | -7.57  |
| P65702 PGK_SALTY Phohoglycerate kinase | 18 | Carbamidomethyl+C(5)                  | YAALCDVFVMDAFGTAHR            | 128 | 18 | 5  | 41.6   | b4b5b10b11°b11                                                         | 2043.93 | 61.937  | 66773  | 3 | 681.98 | -6.15  |
| P65702 PGK_SALTY Phohoglycerate kinase | 19 |                                       | SVNDVK                        | 272 | 6  | 1  | 13.62  | b5                                                                     | 661.36  | 77.700  | 8513   | 1 | 661.36 | 5.26   |
| P65702 PGK_SALTY Phohoglycerate kinase | 20 |                                       | LSNPVR                        | 84  | 6  | 3  | 26.85  | y3y4*y4                                                                | 685.39  | 26.685  | 3914   | 1 | 685.39 | -8.73  |
| P65702 PGK_SALTY Phohoglycerate kinase | 21 |                                       | ISYISTGGGAFLEFVEGK            | 355 | 18 | 7  | 56.08  | b5b11b15y6y8y9y10                                                      | 1874.97 | 89.041  | 3763   | 2 | 937.99 | 9.11   |
| P65702 PGK_SALTY Phohoglycerate kinase | 22 |                                       | EDEQILDIGDASAQQLAEILK         | 278 | 21 | 4  | 35.83  | b6b7y4y5                                                               | 2299.13 | 76.355  | 2417   | 4 | 575.54 | -16.35 |
| P65702 PGK_SALTY Phohoglycerate kinase | 23 | Carbamidomethyl+C(5); Oxidation+M(10) | YAALCDVFVMDAFGTAHR            | 128 | 18 | 8  | 54.86  | b4b5b7b8b9°b9y9°y9                                                     | 2059.96 | 81.660  | 2315   | 3 | 687.32 | 11.14  |
| P65702 PGK_SALTY Phohoglycerate kinase | 24 |                                       | DLDLAGKR                      | 7   | 8  | 1  | 8.25   | b3                                                                     | 887.49  | 41.521  | 18224  | 2 | 444.25 | -0.14  |
| P65702 PGK_SALTY Phohoglycerate kinase | 25 |                                       | TDLDLAGKR                     | 6   | 9  | 1  | 8.25   | b4                                                                     | 988.54  | 41.523  | 15452  | 2 | 494.77 | -4.51  |
| P65702 PGK_SALTY Phohoglycerate kinase | 26 |                                       | YEADLVDEAKR                   | 233 | 11 | 2  | 16.45  | b4b6                                                                   | 1308.65 | 52.884  | 14795  | 2 | 654.83 | 3.36   |
| P65702 PGK_SALTY Phohoglycerate kinase | 27 |                                       | PAVAMLEER                     | 375 | 9  | 2  | 18.87  | b3b7                                                                   | 1015.51 | 79.149  | 10113  | 2 | 508.26 | -14.79 |
| P65702 PGK_SALTY Phohoglycerate kinase | 28 |                                       | DLNPVKEGK                     | 20  | 10 | 2  | 7.86   | b3°b3                                                                  | 1098.61 | 35.734  | 8480   | 2 | 549.81 | -3.22  |

|                                                           |    |                       |                                     |     |    |    |        |                                                                |         |         |        |   |         |        |
|-----------------------------------------------------------|----|-----------------------|-------------------------------------|-----|----|----|--------|----------------------------------------------------------------|---------|---------|--------|---|---------|--------|
| P0A1S0 IHFA_SALTY Integration host factor subunit alpha   | 1  |                       | TGEDIPITAR                          | 66  | 10 | 14 | 103.01 | b2°b2b3°b3b4°b4b5°b5y3y4y5y6y8y10                              | 1072.56 | 41.760  | 52671  | 2 | 536.78  | -3.76  |
| P0A1S0 IHFA_SALTY Integration host factor subunit alpha   | 2  |                       | LSGFGNFDLR                          | 45  | 10 | 8  | 28.67  | b7°b7y1y2y8y9°y9y10                                            | 1125.57 | 71.094  | 29658  | 2 | 563.29  | 0.22   |
| P0A1S0 IHFA_SALTY Integration host factor subunit alpha   | 3  |                       | ALENGEQVK                           | 36  | 9  | 4  | 53.25  | b6y4y6y8                                                       | 987.53  | 27.995  | 1612   | 2 | 494.27  | 18.85  |
| P0A1S0 IHFA_SALTY Integration host factor subunit alpha   | 4  |                       | ALENGEQVKLSGFGNFDLR                 | 36  | 19 | 4  | 14.94  | b3b6°b6y6                                                      | 2094.04 | 96.004  | 2160   | 2 | 1047.52 | -9.33  |
| P0A2A3 RL1_SALTY 50S ribosomal protein L1                 | 1  |                       | VVGQLGQVLGPR                        | 122 | 12 | 14 | 110.05 | b1b2b4b9y2y3y4y6y7y8y9y10°y10y12                               | 1222.72 | 57.954  | 126364 | 2 | 611.86  | -3.69  |
| P0A2A3 RL1_SALTY 50S ribosomal protein L1                 | 2  |                       | VAVFTQGPNAEAAK                      | 74  | 14 | 16 | 96.39  | b3b7b11b14y2y4y7y8°y8y9°y9y10°y10y11°y11y14                    | 1402.74 | 44.078  | 125666 | 2 | 701.87  | 2.78   |
| P0A2A3 RL1_SALTY 50S ribosomal protein L1                 | 3  |                       | VGTVTPNVAEAVK                       | 141 | 13 | 15 | 126.41 | b3°b3b13y1y3y4y5y7y8y9y10y11y12°y12y13                         | 1284.72 | 46.927  | 110994 | 2 | 642.86  | -0.67  |
| P0A2A3 RL1_SALTY 50S ribosomal protein L1                 | 4  |                       | AAGAELVGMEDLADQIK                   | 88  | 17 | 7  | 43.55  | b4b6y2y10y11y12y17                                             | 1730.87 | 78.731  | 29872  | 2 | 865.94  | 5.01   |
| P0A2A3 RL1_SALTY 50S ribosomal protein L1                 | 5  |                       | GATVLPHTGR                          | 60  | 11 | 12 | 76.39  | b3°b3b4°b4b5b8y2y4°y4y6y7y11                                   | 1065.58 | 28.647  | 26221  | 2 | 533.29  | -2.75  |
| P0A2A3 RL1_SALTY 50S ribosomal protein L1                 | 6  |                       | AAGAELVGMEDLADQIKK                  | 88  | 18 | 4  | 34.5   | b2y10y11y12                                                    | 1858.94 | 72.008  | 9115   | 3 | 620.32  | -12.15 |
| P0A2A3 RL1_SALTY 50S ribosomal protein L1                 | 7  |                       | GEMNFDVVIASPDAMR                    | 106 | 16 | 4  | 23.69  | b2b3y11y12                                                     | 1751.81 | 70.606  | 9075   | 3 | 584.61  | -1.67  |
| P0A2A3 RL1_SALTY 50S ribosomal protein L1                 | 8  |                       | KGEMNFDVVIASPDAMR                   | 105 | 17 | 4  | 23.72  | b9°b9b13b15                                                    | 1879.91 | 107.566 | 4255   | 2 | 940.46  | 1.95   |
| P0A2A3 RL1_SALTY 50S ribosomal protein L1                 | 9  |                       | TVLPHGTGR                           | 62  | 9  | 0  | 2.43   |                                                                | 937.51  | 28.643  | 19046  | 2 | 469.26  | -10.09 |
| P0A251 AHPC_SALTY Alkyl hydroperoxide reductase subunit C | 1  |                       | YAMIGDPTGALTR                       | 93  | 13 | 13 | 110.76 | b2b3b4b13y1y3y5y6y7y8y10y11y13                                 | 1365.68 | 61.893  | 81137  | 2 | 683.34  | -0.63  |
| P0A251 AHPC_SALTY Alkyl hydroperoxide reductase subunit C | 2  | Carbamidomethyl+C(13) | AAQYVAAHGPEVCPAK                    | 153 | 16 | 13 | 126.86 | b3b4b8b10b12y3y4y5y8y9y11y12y16                                | 1668.80 | 34.202  | 70214  | 3 | 556.94  | -11.85 |
| P0A251 AHPC_SALTY Alkyl hydroperoxide reductase subunit C | 3  |                       | ATFVVDPQGIIAIEVTAEGIGR              | 120 | 23 | 24 | 192.24 | b2b3°b3b4b5°b5b6b7°b7b8b10y2y3y4y5y6y7y8y9°y9y10y11y17y23      | 2384.27 | 128.127 | 50357  | 3 | 795.43  | -3.99  |
| P0A251 AHPC_SALTY Alkyl hydroperoxide reductase subunit C | 4  | Carbamidomethyl+C(15) | WSVFFFYPADFTFVCPTELGDVA<br>DHYEELQK | 32  | 31 | 5  | 13.85  | b3b7y12y24°y24                                                 | 3757.74 | 118.969 | 16218  | 3 | 1253.25 | 5.20   |
| P0A251 AHPC_SALTY Alkyl hydroperoxide reductase subunit C | 5  |                       | DASDLLR                             | 143 | 7  | 4  | 40.47  | y3y4y5y7                                                       | 789.41  | 44.458  | 4783   | 1 | 789.41  | -5.18  |
| P0A251 AHPC_SALTY Alkyl hydroperoxide reductase subunit C | 6  |                       | NGEFIEVTEKDTEGR                     | 17  | 15 | 4  | 24.16  | b11b12°b12y3                                                   | 1723.82 | 63.784  | 4470   | 3 | 575.28  | 6.30   |
| P0A251 AHPC_SALTY Alkyl hydroperoxide reductase subunit C | 7  |                       | LGVDVYSVSTDTHFTHK                   | 63  | 17 | 5  | 43.55  | b12b13b14y7y13                                                 | 1905.97 | 71.620  | 2311   | 2 | 953.49  | 18.64  |
| P0A251 AHPC_SALTY Alkyl hydroperoxide reductase subunit C | 8  |                       | EGEATLAPSLDLVGKI                    | 171 | 16 | 4  | 23.69  | b6b7°b7y3                                                      | 1612.88 | 84.159  | 40997  | 2 | 806.94  | -2.04  |
| P0A251 AHPC_SALTY Alkyl hydroperoxide reductase subunit C | 9  |                       | NGEFIEVTEKDTEGR                     | 17  | 15 | 3  | 18.14  | b10b13y3                                                       | 1723.81 | 85.118  | 5959   | 3 | 575.27  | -3.68  |
| P0A251 AHPC_SALTY Alkyl hydroperoxide reductase subunit C | 10 |                       | NQAFKNGEFIEVTEK                     | 12  | 15 | 5  | 29.44  | b5y5y10y14°y14                                                 | 1753.86 | 70.998  | 3053   | 3 | 585.29  | -11.62 |
| P0A299 RL7_SALTY 50S ribosomal protein L7/L12             | 1  |                       | DLVESAPAALK                         | 85  | 11 | 7  | 47.53  | b2b11y5y7y8y9y11                                               | 1113.61 | 52.298  | 52689  | 2 | 557.31  | -7.13  |
| P0A299 RL7_SALTY 50S ribosomal protein L7/L12             | 2  |                       | DQIIEAVSAMSVM DVVELISAMEE<br>K      | 5   | 25 | 26 | 224.5  | b2°b2°b2b3b4b5b6b7b8b9°b9b10y2°y2y3y4y5y6y7y8y9°y9y10y11y12y25 | 2737.33 | 137.031 | 35340  | 3 | 913.12  | -0.54  |
| P0A299 RL7_SALTY 50S ribosomal protein L7/L12             | 3  |                       | DLVESAPAALKEGVSK                    | 85  | 16 | 8  | 24.86  | b2°b2b3b5°b5b8y1y16                                            | 1613.86 | 55.485  | 11033  | 3 | 538.62  | -11.50 |

|                                                |    |                       |                                      |     |    |    |        |                                                |         |         |        |   |         |        |
|------------------------------------------------|----|-----------------------|--------------------------------------|-----|----|----|--------|------------------------------------------------|---------|---------|--------|---|---------|--------|
| [P0A299 RL7_SALTY 50S ribosomal protein L7/L12 | 4  |                       | SITKDKIIEAVSAMSVMDEVVELISA MEEK      | 1   | 29 | 5  | 17.49  | b1y2y3y5y16                                    | 3166.60 | 96.409  | 2332   | 4 | 792.41  | 3.39   |
| [P0A299 RL7_SALTY 50S ribosomal protein L7/L12 | 5  |                       | KSLEEAGAEVEVK                        | 108 | 13 | 4  | 34.44  | b7b8y3y7                                       | 1388.71 | 28.683  | 14876  | 3 | 463.58  | -11.87 |
| [P0A299 RL7_SALTY 50S ribosomal protein L7/L12 | 6  |                       | SITKDKIIEAVSAMSVMDEVVELISA MEEK      | 1   | 29 | 3  | 22.72  | y3y4y7                                         | 3166.61 | 136.474 | 6534   | 3 | 1056.21 | 6.48   |
| [P0A299 RL7_SALTY 50S ribosomal protein L7/L12 | 7  | Oxidation+M(27)       | MSITKDKIIEAVSAMSVMDEVVELI SAMEEK     | 0   | 30 | 6  | 24.78  | b7°b7b11*b11y10y11                             | 3313.59 | 100.597 | 8626   | 3 | 1105.20 | -13.11 |
| [P0A299 RL7_SALTY 50S ribosomal protein L7/L12 | 8  |                       | SITKDKIIEAVSAMSVMDEVV                | 1   | 20 | 4  | 26.57  | y4y8y9y14                                      | 2136.12 | 96.412  | 3264   | 3 | 712.71  | 14.63  |
| [P67904 RS10_SALTY 30S ribosomal protein S10   | 1  |                       | LIDQSTAEIVETAKR                      | 16  | 15 | 15 | 147.12 | b3b8y1y2y3y4y5y6y7y8y9y10y11y13y15             | 1673.88 | 50.997  | 97700  | 3 | 558.63  | -13.56 |
| [P67904 RS10_SALTY 30S ribosomal protein S10   | 2  |                       | LIDQSTAEIVETAK                       | 16  | 14 | 12 | 100.37 | b2b3b10y2y3y4y5y8y9y10y11y14                   | 1517.81 | 54.321  | 77632  | 2 | 759.41  | 4.10   |
| [P67904 RS10_SALTY 30S ribosomal protein S10   | 3  |                       | LVDIVEPTEK                           | 72  | 10 | 5  | 26.91  | b2b3y4y8y10                                    | 1142.62 | 50.629  | 37739  | 2 | 571.82  | -5.02  |
| [P67904 RS10_SALTY 30S ribosomal protein S10   | 4  |                       | GPIPLPTRK                            | 37  | 9  | 7  | 45.47  | b1b2b3y3y4y6y9                                 | 978.60  | 41.941  | 30966  | 2 | 489.80  | -7.36  |
| [P67904 RS10_SALTY 30S ribosomal protein S10   | 5  |                       | DQYEIR                               | 62  | 6  | 2  | 26.85  | y3y4                                           | 823.39  | 31.164  | 20460  | 2 | 412.20  | -4.45  |
| [P67904 RS10_SALTY 30S ribosomal protein S10   | 6  |                       | IPLPTRK                              | 39  | 7  | 0  | 1.62   |                                                | 824.53  | 41.931  | 7178   | 2 | 412.77  | -9.77  |
| [P67904 RS10_SALTY 30S ribosomal protein S10   | 7  |                       | DQSTAEIVETAKR                        | 18  | 13 | 3  | 14.92  | b5°b5b9                                        | 1447.75 | 51.023  | 6304   | 2 | 724.38  | 5.23   |
| [P0A1H3 EFG_SALTY Elongation factor G          | 1  |                       | IATDPFVGNLTFFR                       | 323 | 14 | 17 | 129.52 | b2b4b5°b5b6b13b14y1y3y4y6y7*y7y10y11y12y14     | 1597.84 | 92.444  | 104971 | 2 | 799.42  | 0.00   |
| [P0A1H3 EFG_SALTY Elongation factor G          | 2  |                       | VYSGVVNSGDTVLSNVK                    | 337 | 17 | 17 | 130.15 | b2b4°b4b5b14*b14y3y4y5y9y10y11*y11y12y14y15y17 | 1737.91 | 61.019  | 91178  | 2 | 869.46  | 3.09   |
| [P0A1H3 EFG_SALTY Elongation factor G          | 3  |                       | IHAEVPLSEMFYATQLR                    | 653 | 18 | 5  | 32.75  | b4b5b9y5y7                                     | 2062.03 | 89.361  | 66237  | 3 | 688.02  | -5.21  |
| [P0A1H3 EFG_SALTY Elongation factor G          | 4  |                       | SGPLAGYPVVDLGVR                      | 562 | 15 | 13 | 74.54  | b2°b2b3°b3b5b7°b7y3y4y8y10y11y15               | 1499.83 | 75.639  | 66234  | 2 | 750.42  | 2.20   |
| [P0A1H3 EFG_SALTY Elongation factor G          | 5  |                       | IGEVHDDGAATMDWMEQEQR                 | 39  | 20 | 18 | 95.97  | b1b3b4b10b11°b11b12b14y2°y2y3°y3*y3y5y6y7y9y20 | 2331.99 | 61.014  | 60820  | 3 | 778.00  | -2.41  |
| [P0A1H3 EFG_SALTY Elongation factor G          | 6  |                       | GQYGHVVIDMYPLEPGSNPK                 | 512 | 20 | 10 | 69.48  | b5b10b11y5y6*y6y7°y7y9y10                      | 2201.07 | 69.199  | 46538  | 3 | 734.36  | -0.78  |
| [P0A1H3 EFG_SALTY Elongation factor G          | 7  |                       | EFNVEANVGKQPQVAYR                    | 475 | 16 | 8  | 35.08  | b2°b2y2y3y5y6y9y16                             | 1820.91 | 52.137  | 41871  | 3 | 607.64  | -7.91  |
| [P0A1H3 EFG_SALTY Elongation factor G          | 8  |                       | VEVETPEENTGDVIGDLR                   | 618 | 19 | 14 | 84.61  | b3b5°b5b7b9b14*b14y3y5y9°y9y14y15y19           | 2059.00 | 65.734  | 34854  | 2 | 1030.00 | 7.94   |
| [P0A1H3 EFG_SALTY Elongation factor G          | 9  |                       | GQESEVTGVK                           | 643 | 10 | 8  | 51.89  | b2y2y4y5y6y8°y8y10                             | 1033.51 | 24.507  | 32073  | 2 | 517.26  | -10.39 |
| [P0A1H3 EFG_SALTY Elongation factor G          | 10 | Carbamidomethyl+C(20) | AGDIAAIGLKDVTGDTLCPENPIILER          | 378 | 30 | 9  | 33.52  | b3b17b27y2y3y10*y10y11y13                      | 3138.61 | 84.332  | 29426  | 3 | 1046.88 | 4.67   |
| [P0A1H3 EFG_SALTY Elongation factor G          | 11 |                       | LGANPVPLQLAIGAEEGFTGVVDLVK           | 161 | 26 | 5  | 18.28  | b4y3y7y14y26                                   | 2607.41 | 119.419 | 24159  | 3 | 869.81  | -9.93  |
| [P0A1H3 EFG_SALTY Elongation factor G          | 12 |                       | YDDAPNNVAQAVIEAR                     | 686 | 16 | 5  | 25.53  | y2y8y12°y12y13                                 | 1745.86 | 64.020  | 23044  | 2 | 873.43  | 6.99   |
| [P0A1H3 EFG_SALTY Elongation factor G          | 13 | Carbamidomethyl+C(10) | VLDGAVMVYCAVGGVQPQSETVWR             | 104 | 24 | 9  | 27.59  | b2b8°b8b14b15y1y8y15y24                        | 2621.29 | 85.180  | 21711  | 3 | 874.43  | 1.21   |
| [P0A1H3 EFG_SALTY Elongation factor G          | 14 |                       | GVQAMLDIVIDYLPSPVDVPAINGILDDGKDTPAER | 273 | 36 | 6  | 30.17  | b2y3y5y6y13y23                                 | 3764.93 | 121.911 | 11212  | 3 | 1255.65 | 6.55   |
| [P0A1H3 EFG_SALTY Elongation factor G          | 15 |                       | LAASIAFKEGFK                         | 594 | 12 | 3  | 22.28  | b7y4y10                                        | 1281.72 | 46.391  | 9541   | 3 | 427.91  | 0.95   |
| [P0A1H3 EFG_SALTY Elongation factor G          | 16 |                       | YLGGEELTEEEIK                        | 236 | 13 | 4  | 20.64  | b2b7y6y11                                      | 1509.74 | 56.573  | 5754   | 2 | 755.37  | 4.53   |



|                                      |    |                                          |                                                         |     |    |    |        |                                                              |         |         |        |   |         |        |
|--------------------------------------|----|------------------------------------------|---------------------------------------------------------|-----|----|----|--------|--------------------------------------------------------------|---------|---------|--------|---|---------|--------|
| P0A1H3 EFG_SALTY Elongation factor G | 17 |                                          | VEVETPEENTGDVIGDLSRR                                    | 618 | 20 | 4  | 22.5   | b1b13y12y13                                                  | 2215.08 | 81.633  | 2227   | 3 | 739.03  | -3.31  |
| P0A1H3 EFG_SALTY Elongation factor G | 18 |                                          | MEFPEPVISIAVEPK                                         | 408 | 15 | 4  | 25.8   | b3b9y7y12                                                    | 1685.89 | 85.130  | 47030  | 2 | 843.45  | 5.00   |
| P0A1H3 EFG_SALTY Elongation factor G | 19 |                                          | HASDDEPFSSALAFK                                         | 309 | 14 | 5  | 27.58  | b5b12y7y12°y12                                               | 1534.72 | 69.370  | 27963  | 2 | 767.87  | 3.82   |
| P0A1H3 EFG_SALTY Elongation factor G | 20 |                                          | ILFYTGvNHK                                              | 29  | 10 | 4  | 33.9   | y5y7°y7y8                                                    | 1191.63 | 53.760  | 21670  | 3 | 397.88  | -16.80 |
| P0A1H3 EFG_SALTY Elongation factor G | 21 |                                          | VVGQIK                                                  | 153 | 6  | 1  | 13.62  | b5                                                           | 643.41  | 43.936  | 15744  | 1 | 643.41  | -4.55  |
| P0A1H3 EFG_SALTY Elongation factor G | 22 |                                          | QSGGR                                                   | 507 | 5  | 1  | 13.22  | b3                                                           | 504.25  | 47.029  | 14835  | 1 | 504.25  | 1.45   |
| P0A1H3 EFG_SALTY Elongation factor G | 23 |                                          | IAFVNK                                                  | 137 | 6  | 1  | 13.62  | b5                                                           | 691.41  | 39.014  | 8878   | 1 | 691.41  | -9.09  |
| P0A1H3 EFG_SALTY Elongation factor G | 24 |                                          | AINWNDADQGVTFEYEDIPADMQ<br>DLANEWHQNLISSAAEASEELME<br>K | 189 | 47 | 20 | 156.07 | b3b6b10b11b12y3°y3y4°y4<br>y5y6y7y8°y8y9°y9y10°y10<br>y11y12 | 5380.44 | 125.428 | 5195   | 4 | 1345.86 | 9.62   |
| P0A1H3 EFG_SALTY Elongation factor G | 25 |                                          | LHFGSYHDVDSSELAfK                                       | 577 | 17 | 3  | 23.31  | b6y13y14                                                     | 1951.95 | 83.463  | 4076   | 3 | 651.32  | 17.70  |
| P0A1H3 EFG_SALTY Elongation factor G | 26 |                                          | YLGEELTEEEIKQALR                                        | 236 | 17 | 4  | 16.32  | b8y5y10*y10                                                  | 1978.00 | 72.429  | 85838  | 3 | 660.00  | -8.64  |
| P0A1H3 EFG_SALTY Elongation factor G | 27 |                                          | GITITSAATTAFWSGMAKQYEPHR                                | 59  | 24 | 6  | 26.16  | b13b22°b22y6*y6y7                                            | 2624.28 | 75.324  | 78446  | 4 | 656.82  | -6.33  |
| P0A1H3 EFG_SALTY Elongation factor G | 28 |                                          | ASYTMEFLKYDDAPNNVAQAVIE<br>AR                           | 677 | 25 | 8  | 39.3   | b11b12b13°b13y3°y3y8*y8                                      | 2816.38 | 83.509  | 59762  | 3 | 939.47  | 8.84   |
| P0A1H3 EFG_SALTY Elongation factor G | 29 |                                          | GGVIPGEYIPAVDKGIEQLK                                    | 541 | 21 | 3  | 22.33  | b3b4y12                                                      | 2211.20 | 73.343  | 26024  | 3 | 737.74  | -2.54  |
| P0A1H3 EFG_SALTY Elongation factor G | 30 |                                          | QYEPHRINIIDTPGHVDFTIEVER                                | 77  | 24 | 4  | 22     | b3b4y7°y7                                                    | 2878.45 | 58.941  | 7245   | 4 | 720.37  | 0.51   |
| P0A1H3 EFG_SALTY Elongation factor G | 31 |                                          | GRASYTMEFLK                                             | 675 | 11 | 4  | 36.73  | b5b6b10y9                                                    | 1302.63 | 33.480  | 1630   | 2 | 651.82  | -14.06 |
| P0A1H3 EFG_SALTY Elongation factor G | 32 | Phosphoryl STY(4)                        | LAASIAFKEGFK                                            | 594 | 12 | 3  | 22.28  | b3b8y9                                                       | 1361.69 | 88.220  | 2320   | 2 | 681.35  | 12.01  |
| P0A1H3 EFG_SALTY Elongation factor G | 33 | Carbamidomethyl+C(10)<br>;Oxidation+M(7) | VLDGAVMVYCAVGGVQPQSETV<br>WR                            | 104 | 24 | 7  | 30.35  | b9b11b16°b16y10y12y20                                        | 2637.27 | 93.971  | 16744  | 3 | 879.76  | -4.72  |
| P0A1H3 EFG_SALTY Elongation factor G | 34 | Oxidation+M(10)                          | GQYGHVVIDMYPLEPGSNPK                                    | 512 | 20 | 4  | 19.76  | b10b13y4y14                                                  | 2217.10 | 87.103  | 4228   | 2 | 1109.05 | 14.10  |
| P0AA28 THIO_SALTY Thioredoxin-1      | 1  |                                          | MIAPILDEIADEYQGK                                        | 37  | 16 | 15 | 136.45 | b2b11y2y3y4y5°y5y6y7y9y<br>10y11y13y14y16                    | 1805.90 | 92.761  | 167961 | 2 | 903.46  | 3.24   |
| P0AA28 THIO_SALTY Thioredoxin-1      | 2  |                                          | LNIDQNPGTAPK                                            | 58  | 12 | 14 | 105.79 | b2*b2b3b4b10y2y3y6y7y8<br>y9*y9y10y12                        | 1267.66 | 37.390  | 130214 | 2 | 634.33  | -4.33  |
| P0AA28 THIO_SALTY Thioredoxin-1      | 3  |                                          | GIPTLLLFK                                               | 74  | 9  | 13 | 104.37 | b2b3b5°b5b6y1y2y3y4y5y<br>6y7y9                              | 1001.63 | 89.781  | 63252  | 2 | 501.32  | -9.38  |
| P0AA28 THIO_SALTY Thioredoxin-1      | 4  |                                          | MIAPILDEIADEYQGKLTVAK                                   | 37  | 21 | 4  | 24.71  | b3y11y12y18                                                  | 2318.22 | 93.957  | 59258  | 3 | 773.41  | -2.74  |
| P0AA28 THIO_SALTY Thioredoxin-1      | 5  | Oxidation+M(1)                           | MIAPILDEIADEYQGK                                        | 37  | 16 | 4  | 28.34  | b13y9y13y14                                                  | 1821.91 | 86.636  | 6515   | 2 | 911.46  | 11.19  |
| P0AA28 THIO_SALTY Thioredoxin-1      | 6  |                                          | PTLLLFK                                                 | 76  | 7  | 3  | 38.27  | b3b4b5                                                       | 831.52  | 89.784  | 63624  | 2 | 416.26  | -14.39 |
| P0AA28 THIO_SALTY Thioredoxin-1      | 7  |                                          | APILDEIADEYQGK                                          | 39  | 14 | 0  | 4.45   |                                                              | 1561.78 | 92.795  | 1901   | 2 | 781.40  | 6.49   |
| P66038 RISB_SALTY 6                  | 1  |                                          | IGQVKDDNITVVWVPGAYELPLA<br>TEALAK                       | 40  | 29 | 14 | 85.23  | b3b8b10°b10b11°b11b12b<br>13b14y9y12y15y16y29                | 3110.69 | 97.631  | 83202  | 3 | 1037.57 | 2.67   |
| P66038 RISB_SALTY 6                  | 2  |                                          | FNQFINDSLLDGAVDALTR                                     | 21  | 19 | 17 | 138.39 | b3b4y2y3y4y5y6y8y9°y9y1<br>0y13°y13y14y15y19*y19             | 2109.08 | 100.548 | 60383  | 2 | 1055.04 | 8.91   |

|                                        |    |                      |                            |     |    |    |        |                                                     |         |         |        |   |         |        |
|----------------------------------------|----|----------------------|----------------------------|-----|----|----|--------|-----------------------------------------------------|---------|---------|--------|---|---------|--------|
| P66038 RISB_SALTY 6                    | 3  |                      | GAEAAALTALEMINVLK          | 136 | 16 | 8  | 45.95  | b2b5b12b15y3y4y10y16                                | 1643.91 | 102.257 | 46825  | 2 | 822.46  | 2.82   |
| P66038 RISB_SALTY 6                    | 4  |                      | ANVAAPDAR                  | 5   | 9  | 6  | 38.27  | b2*b2y2y5y6y7                                       | 884.45  | 21.649  | 12219  | 2 | 442.73  | -7.87  |
| P66038 RISB_SALTY 6                    | 5  |                      | DDNITVVWVPGAYELPLATEALAK   | 45  | 24 | 4  | 19.45  | b4b12b14y16                                         | 2585.39 | 103.997 | 1888   | 2 | 1293.20 | 16.34  |
| P64052 EFTS_SALTY Elongation factor Ts | 1  |                      | VASLEGDVLGSYQHGAR          | 134 | 17 | 20 | 122.49 | b3°b3b6b8y1y3y4y5*y5y6y7°y7y8y9°y9*y9y10°y10y11*y17 | 1758.86 | 57.763  | 129685 | 3 | 586.96  | -12.28 |
| P64052 EFTS_SALTY Elongation factor Ts | 2  |                      | ITDVEVLK                   | 104 | 8  | 5  | 40.87  | y2y3y6y7y8                                          | 916.52  | 47.447  | 111154 | 2 | 458.77  | -11.12 |
| P64052 EFTS_SALTY Elongation factor Ts | 3  |                      | FTGEVSLTGQPFVMEPSK         | 222 | 18 | 8  | 32.75  | b3b11y1y5y12°y12y13y18                              | 1953.98 | 73.797  | 110920 | 2 | 977.49  | 7.68   |
| P64052 EFTS_SALTY Elongation factor Ts | 4  |                      | ALTEANGDIELAIENMRK         | 25  | 18 | 5  | 32.75  | b9b10b14y14y16                                      | 1987.99 | 73.300  | 65852  | 3 | 663.34  | -10.25 |
| P64052 EFTS_SALTY Elongation factor Ts | 5  |                      | IGENINIR                   | 125 | 8  | 9  | 54.09  | b2y2y3*y3y5*y5y6y7y8                                | 928.51  | 43.328  | 63720  | 2 | 464.76  | -8.55  |
| P64052 EFTS_SALTY Elongation factor Ts | 6  |                      | AEITASLVK                  | 1   | 9  | 4  | 38.27  | y4y5y6y9                                            | 931.54  | 47.510  | 63276  | 2 | 466.27  | -7.93  |
| P64052 EFTS_SALTY Elongation factor Ts | 7  |                      | IGVLVAAK                   | 151 | 8  | 7  | 77.52  | b3b4y3y5y6y7y8                                      | 770.50  | 46.023  | 56827  | 2 | 385.75  | -14.58 |
| P64052 EFTS_SALTY Elongation factor Ts | 8  | Carbamidomethyl+C(8) | TGAGMMDCKK                 | 15  | 10 | 8  | 40.13  | b2°b2b5y2y4y5y7y10                                  | 1098.47 | 20.033  | 27926  | 2 | 549.74  | -5.00  |
| P64052 EFTS_SALTY Elongation factor Ts | 9  |                      | EYQVQLDIAMQSGKPK           | 193 | 16 | 5  | 35.44  | b3b5b6y4y7                                          | 1834.95 | 69.503  | 7540   | 3 | 612.32  | 8.71   |
| P64052 EFTS_SALTY Elongation factor Ts | 10 |                      | VETDFAAEVAAMSK             | 267 | 14 | 3  | 19.29  | b5b9y3                                              | 1468.72 | 68.027  | 3768   | 2 | 734.86  | 12.30  |
| P64052 EFTS_SALTY Elongation factor Ts | 11 |                      | MAEITASLVKELR              | 0   | 13 | 4  | 28.12  | b4°b4b6b7                                           | 1460.82 | 77.258  | 2307   | 3 | 487.61  | 0.75   |
| P64052 EFTS_SALTY Elongation factor Ts | 12 |                      | VLDAAVAGK                  | 95  | 9  | 5  | 67.72  | y3y4y5y7y8                                          | 843.48  | 32.605  | 38407  | 2 | 422.24  | -15.34 |
| P64052 EFTS_SALTY Elongation factor Ts | 13 |                      | AGNVAADGVIK                | 52  | 11 | 3  | 36.07  | y5y6y7                                              | 1014.55 | 35.642  | 19569  | 2 | 507.78  | -3.91  |
| P64052 EFTS_SALTY Elongation factor Ts | 14 |                      | ALTEANGDIELAIENMR          | 25  | 17 | 7  | 48.2   | b6*b6b13y3y4y5y11                                   | 1859.93 | 81.187  | 2461   | 2 | 930.47  | 7.29   |
| P64052 EFTS_SALTY Elongation factor Ts | 15 |                      | DAGFQAFADKVLDAAVAGK        | 85  | 19 | 4  | 14.94  | b3b6*b6y17                                          | 1893.95 | 97.090  | 110877 | 3 | 631.99  | -10.25 |
| P64052 EFTS_SALTY Elongation factor Ts | 16 |                      | KALTEANGDIELAIENMR         | 24  | 18 | 3  | 15.58  | b11y6y16                                            | 1988.02 | 65.770  | 12677  | 2 | 994.52  | 6.51   |
| P64052 EFTS_SALTY Elongation factor Ts | 17 |                      | FEVGEGIEKVETDFAAEVAAMSK    | 258 | 23 | 7  | 33.91  | b6b13°b13y6y9y12y14                                 | 2457.21 | 106.261 | 1615   | 2 | 1229.11 | 10.43  |
| P64052 EFTS_SALTY Elongation factor Ts | 18 | Phosphoryl STY(7)    | MAEITASLVKELR              | 0   | 13 | 4  | 25.41  | b5°b5b6y12                                          | 1540.78 | 64.274  | 9809   | 2 | 770.89  | 6.18   |
| P64052 EFTS_SALTY Elongation factor Ts | 19 | Phosphoryl STY(2)    | ITDVEVLK                   | 104 | 8  | 3  | 40.87  | y4y5y6                                              | 996.49  | 39.848  | 6818   | 2 | 498.75  | -4.35  |
| P64052 EFTS_SALTY Elongation factor Ts | 20 | Phosphoryl STY(7)    | MAEITASLVK                 | 0   | 10 | 5  | 26.91  | b5°b5b9°b9y4                                        | 1142.55 | 25.890  | 3352   | 2 | 571.78  | 1.92   |
| P64052 EFTS_SALTY Elongation factor Ts | 21 | Oxidation+M(12)      | VETDFAAEVAAMSK             | 267 | 14 | 8  | 60.41  | b5y4y5y6y8°y8y9°y9                                  | 1484.69 | 76.405  | 15330  | 2 | 742.85  | 0.74   |
| P64052 EFTS_SALTY Elongation factor Ts | 22 | Oxidation+M(14)      | FTGEVSLTGQPFVMEPSK         | 222 | 18 | 10 | 40.82  | b3°b3b5y5y6°y6y11°y11*y11y13                        | 1969.99 | 82.555  | 5399   | 3 | 657.33  | 14.69  |
| P64052 EFTS_SALTY Elongation factor Ts | 23 | Oxidation+M(4)       | QLAMHVAASKPEFVKPEDVSADVVEK | 167 | 26 | 5  | 22.81  | b6b7°b7b10y11                                       | 2840.45 | 60.460  | 3021   | 3 | 947.49  | -0.77  |
| P64052 EFTS_SALTY Elongation factor Ts | 24 |                      | GVLVAAK                    | 152 | 7  | 0  | 1.21   |                                                     | 657.43  | 46.019  | 9647   | 1 | 657.43  | -5.29  |
| P64052 EFTS_SALTY Elongation factor Ts | 25 | Carbamidomethyl+C(7) | GAGMMDCKK                  | 16  | 9  | 1  | 8.25   | b3                                                  | 997.42  | 20.022  | 6207   | 2 | 499.21  | -4.83  |
| P00924 ENO1_YEAST Enolase 1            | 1  |                      | NVNDVIAPAFVK               | 67  | 12 | 17 | 141.26 | b2b4b5°b5b6°b6y2y3y4y5y6y7y8y9y10*y10y12            | 1286.71 | 65.044  | 100928 | 2 | 643.86  | -1.71  |

|                                           |    |                      |                                    |     |    |    |        |                                                      |         |         |        |   |         |        |
|-------------------------------------------|----|----------------------|------------------------------------|-----|----|----|--------|------------------------------------------------------|---------|---------|--------|---|---------|--------|
| P00924 ENO1_YEAST Enolase 1               | 2  |                      | VNQIGTLSSESIK                      | 346 | 12 | 12 | 96.83  | b2b6b10y3y5y8°y8y9°y9y10y11y12                       | 1288.71 | 53.135  | 95711  | 2 | 644.86  | 2.56   |
| P00924 ENO1_YEAST Enolase 1               | 3  |                      | SIVPSGASTGVHEALEMR                 | 32  | 18 | 14 | 108.54 | b8y2y3y5y6°y6y9°y9y10y11y14y15y16°y16                | 1840.91 | 60.334  | 80132  | 3 | 614.31  | -7.43  |
| P00924 ENO1_YEAST Enolase 1               | 4  |                      | AADALLLK                           | 338 | 8  | 7  | 62.54  | b5y2y3y4y5y6y8                                       | 814.49  | 52.561  | 79381  | 2 | 407.75  | -12.51 |
| P00924 ENO1_YEAST Enolase 1               | 5  |                      | TFAEALR                            | 178 | 7  | 6  | 63.9   | b3y3y4y5y6y7                                         | 807.43  | 44.320  | 63681  | 2 | 404.22  | -9.90  |
| P00924 ENO1_YEAST Enolase 1               | 6  |                      | TAGIQIVADDLTVTNPK                  | 312 | 17 | 6  | 36.15  | b5y8y10y11y13y17                                     | 1755.96 | 71.476  | 44242  | 2 | 878.48  | 7.86   |
| P00924 ENO1_YEAST Enolase 1               | 7  |                      | IEEELGDNAVFAGENFHHGDK              | 415 | 21 | 5  | 18.93  | b3b5y13y19y21                                        | 2328.03 | 56.511  | 41744  | 4 | 582.76  | -11.01 |
| P00924 ENO1_YEAST Enolase 1               | 8  |                      | AVDDFLISLDGTANK                    | 88  | 15 | 8  | 47.59  | b11b13y1y5y6y8y12y15                                 | 1578.81 | 81.312  | 30517  | 2 | 789.91  | 4.72   |
| P00924 ENO1_YEAST Enolase 1               | 9  |                      | WLTGPQLADLYHSLMK                   | 272 | 16 | 6  | 17.16  | b6°b6b12y1y2y15                                      | 1872.98 | 90.739  | 6973   | 2 | 936.99  | 7.89   |
| P00924 ENO1_YEAST Enolase 1               | 10 |                      | IATAIEK                            | 330 | 7  | 8  | 83.14  | b4°b4b6y3y4°y4y5y6                                   | 745.43  | 27.367  | 33775  | 2 | 373.22  | -15.72 |
| P00924 ENO1_YEAST Enolase 1               | 11 |                      | LNQLLR                             | 409 | 6  | 4  | 40.07  | y3y4y5°y5                                            | 756.46  | 41.480  | 29504  | 2 | 378.74  | -12.67 |
| P00924 ENO1_YEAST Enolase 1               | 12 |                      | AAQDSFAAGWGVMSHR                   | 358 | 17 | 5  | 22.93  | b3b5y3°y3y6                                          | 1789.88 | 49.676  | 18187  | 2 | 895.45  | 21.89  |
| P00924 ENO1_YEAST Enolase 1               | 13 |                      | YDLDFK                             | 258 | 6  | 3  | 29.86  | y3y5°y5                                              | 800.39  | 99.348  | 8905   | 1 | 800.39  | 10.52  |
| P00924 ENO1_YEAST Enolase 1               | 14 |                      | HLADLSK                            | 132 | 7  | 6  | 66.91  | b4°b4b5y3y4y5                                        | 783.42  | 27.354  | 3891   | 2 | 392.21  | -19.71 |
| P00924 ENO1_YEAST Enolase 1               | 15 |                      | YPIVSIEDPFAEDDWEAWSHFFK            | 289 | 23 | 4  | 19.46  | b8°b8b12b16                                          | 2828.34 | 124.074 | 2811   | 3 | 943.45  | 17.09  |
| P00924 ENO1_YEAST Enolase 1               | 16 |                      | SIVPSGASTGVHEALEMRDGDK             | 32  | 22 | 3  | 13.44  | b12b14y12                                            | 2256.06 | 71.681  | 78851  | 4 | 564.77  | -15.04 |
| P00924 ENO1_YEAST Enolase 1               | 17 | Carbamidomethyl+C(7) | VKIGLDCASSEFFK                     | 241 | 14 | 3  | 24.73  | b10b11y11                                            | 1600.80 | 48.307  | 5295   | 3 | 534.27  | -1.14  |
| P00924 ENO1_YEAST Enolase 1               | 18 |                      | VYARSVYDSR                         | 5   | 10 | 5  | 54.32  | b8b9y3y4y9                                           | 1215.61 | 48.314  | 4599   | 2 | 608.31  | -4.72  |
| P00924 ENO1_YEAST Enolase 1               | 19 | Phosphoryl STY(12)   | AVDDFLISLDGTANK                    | 88  | 15 | 3  | 24.16  | b10b11y11                                            | 1658.76 | 70.901  | 3762   | 3 | 553.59  | 2.65   |
| P00924 ENO1_YEAST Enolase 1               | 20 | Phosphoryl STY(8)    | SIVPSGASTGVHEALEMR                 | 32  | 18 | 4  | 22.98  | b6_H3PO4 b6°b6b7y3                                   | 1920.85 | 103.737 | 1966   | 3 | 640.96  | -13.73 |
| P00924 ENO1_YEAST Enolase 1               | 21 | Oxidation+M(15)      | WLTGPQLADLYHSLMK                   | 272 | 16 | 4  | 17.16  | b4b13°b13y9                                          | 1888.99 | 84.781  | 39902  | 2 | 945.00  | 12.34  |
| P00924 ENO1_YEAST Enolase 1               | 22 | Oxidation+M(17)      | SIVPSGASTGVHEALEMR                 | 32  | 18 | 3  | 15.58  | b7y3y11                                              | 1856.91 | 52.740  | 17699  | 3 | 619.64  | -5.26  |
| P00924 ENO1_YEAST Enolase 1               | 23 |                      | PSGASTGVHEALEMR                    | 35  | 15 | 2  | 7.34   | b8°b8                                                | 1541.74 | 60.343  | 5307   | 2 | 771.38  | 4.67   |
| P00924 ENO1_YEAST Enolase 1               | 24 |                      | ADALLLK                            | 339 | 7  | 0  | 1.21   |                                                      | 743.47  | 52.551  | 5237   | 1 | 743.47  | -0.66  |
| P0A7W4 RS5_SALTY 30S ribosomal protein S5 | 1  |                      | VFMQPASEGTGIIAGGAMR                | 93  | 19 | 20 | 191.16 | b2b3b4b6b7b10b12b13y4y5y6y7y10y11y12y13y15y16°y16y19 | 1892.95 | 67.037  | 139997 | 2 | 946.98  | 8.83   |
| P0A7W4 RS5_SALTY 30S ribosomal protein S5 | 2  |                      | AVLEVAGVHNVLAK                     | 112 | 14 | 14 | 114.84 | b2b3b4b13y1y2y3y6y8y9y10y11y12y14                    | 1419.81 | 59.344  | 119653 | 3 | 473.94  | -14.70 |
| P0A7W4 RS5_SALTY 30S ribosomal protein S5 | 3  |                      | AYGSTNPINVVR                       | 126 | 12 | 13 | 93.82  | b1b2b5b11y2y3y4°y4y6y7y8y10y12                       | 1290.68 | 49.880  | 85443  | 2 | 645.84  | 0.19   |
| P0A7W4 RS5_SALTY 30S ribosomal protein S5 | 4  |                      | ATIDGLENMNSPEMVA AK                | 138 | 18 | 16 | 105.95 | b6°b6b11b15°b15y3y4y7°y7y10y11y12°y12y14y15y18       | 1890.91 | 62.122  | 71137  | 2 | 945.96  | 6.91   |
| P0A7W4 RS5_SALTY 30S ribosomal protein S5 | 5  |                      | SVEEILGK                           | 159 | 8  | 8  | 64.3   | b1b6b7y1y3y4y6y8                                     | 874.47  | 48.987  | 54668  | 2 | 437.74  | -15.01 |
| P0A7W4 RS5_SALTY 30S ribosomal protein S5 | 6  |                      | ATIDGLENMNSPEMVA AKR               | 138 | 19 | 9  | 62.44  | b4b7b10y3y4y8y11°y11y12                              | 2046.99 | 57.848  | 39339  | 3 | 683.00  | -4.41  |
| P0A7W4 RS5_SALTY 30S ribosomal protein S5 | 7  |                      | IFSFTALTTVGDGNR                    | 29  | 16 | 3  | 34.57  | y7y8y9                                               | 1653.84 | 85.750  | 31953  | 2 | 827.42  | -10.41 |
| P0A7W4 RS5_SALTY 30S ribosomal protein S5 | 8  |                      | VGFGYGK                            | 45  | 7  | 5  | 40.47  | b2b6y2y3y5                                           | 727.37  | 38.402  | 15973  | 2 | 364.19  | -10.57 |
| P0A7W4 RS5_SALTY 30S ribosomal protein S5 | 9  |                      | LIAVNR                             | 14  | 6  | 2  | 26.85  | y4y5                                                 | 685.43  | 31.764  | 12147  | 1 | 685.43  | -4.01  |
| P0A7W4 RS5_SALTY 30S ribosomal protein S5 | 10 |                      | AHIEK                              | 1   | 5  | 4  | 39.66  | b3b4y4°y4                                            | 597.33  | 21.941  | 11903  | 1 | 597.33  | -11.04 |
| P0A7W4 RS5_SALTY 30S ribosomal protein S5 | 11 |                      | GKSVEEILGK                         | 157 | 10 | 3  | 36.91  | y3y4y5                                               | 1059.60 | 49.861  | 45656  | 2 | 530.30  | -2.53  |
| P0A7W4 RS5_SALTY 30S ribosomal protein S5 | 12 |                      | VFMQPASEGTGIIAGGAMRAVLE VAGVHNVLAK | 93  | 33 | 5  | 16.83  | b10°b10b13b15°b15                                    | 3293.74 | 111.728 | 7320   | 3 | 1098.58 | -3.78  |
| P0A7W4 RS5_SALTY 30S ribosomal protein S5 | 13 |                      | AYGSTNPINVVVRATIDGLENMNSPEMVA AK   | 126 | 30 | 3  | 22.73  | b3b4b12                                              | 3162.55 | 77.277  | 3879   | 3 | 1054.85 | -2.78  |

|                                                              |    |                       |                                   |     |    |    |        |                                               |         |         |       |   |         |        |
|--------------------------------------------------------------|----|-----------------------|-----------------------------------|-----|----|----|--------|-----------------------------------------------|---------|---------|-------|---|---------|--------|
| P0A7W4 RS5_SALTY 30S ribosomal protein S5                    | 14 |                       | GVHTGSRVFMQPASEGTHIAGGAMR         | 86  | 26 | 3  | 12.14  | b12b15y6                                      | 2587.27 | 136.509 | 3629  | 3 | 863.10  | -4.81  |
| P0A7W4 RS5_SALTY 30S ribosomal protein S5                    | 15 |                       | GGRIFSFTALTVVGDGNR                | 26  | 19 | 4  | 22.72  | b3y7y8*y8                                     | 1924.00 | 121.789 | 2006  | 2 | 962.50  | -1.33  |
| P0A7W4 RS5_SALTY 30S ribosomal protein S5                    | 16 | Oxidation+M(3)        | VFMQPASEGTHIAGGAMR                | 93  | 19 | 3  | 14.94  | b5b16y5                                       | 1908.94 | 59.018  | 3075  | 2 | 954.97  | 3.39   |
| P0A7W4 RS5_SALTY 30S ribosomal protein S5                    | 17 |                       | VEEILGK                           | 160 | 7  | 2  | 9.66   | b3*b3                                         | 787.46  | 49.054  | 2141  | 2 | 394.23  | 6.74   |
| P0A297 RL10_SALTY 50S ribosomal protein L10                  | 1  |                       | LATLPTYEEAIAR                     | 125 | 13 | 11 | 61.09  | b2b3*b3b4*b4y2y4y8y9y10y13                    | 1447.78 | 64.006  | 97618 | 2 | 724.39  | -0.59  |
| P0A297 RL10_SALTY 50S ribosomal protein L10                  | 2  |                       | AAAFEGELIPASQIDR                  | 109 | 16 | 17 | 124.52 | b1b3b5b7b8b9b12y1y2y5y7y8*y8y9y11y12y16       | 1687.88 | 67.663  | 68252 | 2 | 844.44  | 8.46   |
| P0A297 RL10_SALTY 50S ribosomal protein L10                  | 3  | Carbamidomethyl+C(9)  | VVEGTQFECLKDTFVGPTLIAYSM EHPGAAAR | 62  | 32 | 5  | 15.86  | b3y6y8y13y32                                  | 3494.69 | 91.448  | 54398 | 4 | 874.43  | -4.19  |
| P0A297 RL10_SALTY 50S ribosomal protein L10                  | 4  |                       | GALSAVVADSR                       | 20  | 11 | 8  | 70.96  | b4y2y3y4y5y7y8y11                             | 1045.56 | 47.002  | 44526 | 2 | 523.29  | 0.23   |
| P0A297 RL10_SALTY 50S ribosomal protein L10                  | 5  |                       | QAIAEVSEVAK                       | 8   | 12 | 9  | 40.27  | b2b9*b9b12y8y9*y9y10y12                       | 1243.69 | 56.081  | 22052 | 2 | 622.35  | -0.59  |
| P0A297 RL10_SALTY 50S ribosomal protein L10                  | 6  |                       | DTFVGPTLIAYSM EHPGAAAR            | 73  | 21 | 8  | 37.58  | b2b3*b3b8b12y5y6y9                            | 2204.08 | 81.687  | 11363 | 3 | 735.36  | -0.44  |
| P0A297 RL10_SALTY 50S ribosomal protein L10                  | 7  |                       | EAGVYMR                           | 46  | 7  | 4  | 40.47  | b4y3y6y7                                      | 825.39  | 30.660  | 3777  | 2 | 413.20  | -2.96  |
| P0A297 RL10_SALTY 50S ribosomal protein L10                  | 8  | Carbamidomethyl+C(9)  | VVEGTQFECLK                       | 62  | 11 | 4  | 36.07  | b4b6b8y11                                     | 1309.63 | 48.900  | 3679  | 2 | 655.32  | -10.53 |
| P0A297 RL10_SALTY 50S ribosomal protein L10                  | 9  |                       | GVTVDK                            | 31  | 6  | 2  | 29.86  | b3b5                                          | 618.35  | 70.458  | 4771  | 1 | 618.35  | 12.44  |
| P0A297 RL10_SALTY 50S ribosomal protein L10                  | 10 |                       | LMATMK                            | 138 | 6  | 1  | 13.62  | b4                                            | 694.37  | 44.059  | 4133  | 1 | 694.37  | 4.31   |
| P0A297 RL10_SALTY 50S ribosomal protein L10                  | 11 | Carbamidomethyl+C(10) | RVVEGTQFECLK                      | 61  | 12 | 5  | 22.28  | b8*b8b10y9*y9                                 | 1465.73 | 63.382  | 2156  | 2 | 733.37  | -11.91 |
| P0A297 RL10_SALTY 50S ribosomal protein L10                  | 12 |                       | DTFVGPTLIAYSM EHPGAAARL FK        | 73  | 24 | 3  | 12.71  | b3b13y14                                      | 2592.36 | 96.561  | 1519  | 3 | 864.79  | 13.09  |
| Q7CQN4 LPP1_SALTY Major outer membrane lipoprotein 1         | 1  |                       | SDVQAAKDDAAR                      | 52  | 12 | 9  | 100.14 | b9y3y4y5y6y7y8y9y12                           | 1246.60 | 16.973  | 26308 | 2 | 623.80  | -3.23  |
| Q7CQN4 LPP1_SALTY Major outer membrane lipoprotein 1         | 2  |                       | VDQLSNDVNAMR                      | 40  | 12 | 5  | 29.48  | y2y5y7y8y12                                   | 1361.65 | 47.569  | 25607 | 2 | 681.33  | 3.77   |
| Q7CQN4 LPP1_SALTY Major outer membrane lipoprotein 1         | 3  |                       | IDQLSSDVQTLNAK                    | 26  | 14 | 5  | 27.58  | b5*b5b9y11y13                                 | 1531.80 | 87.221  | 1520  | 3 | 511.27  | 4.78   |
| Q7CQN4 LPP1_SALTY Major outer membrane lipoprotein 1         | 4  | Phosphoryl STY()      | IDQLSSDVQTLNAK                    | 26  | 14 | 4  | 19.29  | b4*b4y8y12                                    | 1611.76 | 62.837  | 1824  | 2 | 806.39  | 6.29   |
| Q7CQN4 LPP1_SALTY Major outer membrane lipoprotein 1         | 5  |                       | QAAKDDAAR                         | 55  | 9  | 0  | 2.83   |                                               | 945.48  | 16.904  | 2871  | 2 | 473.24  | 4.07   |
| Q7CQN4 LPP1_SALTY Major outer membrane lipoprotein 1         | 6  |                       | VQAAKDDAAR                        | 54  | 10 | 0  | 2.83   |                                               | 1044.53 | 16.910  | 2552  | 2 | 522.77  | -9.47  |
| Q8ZQD4 LOLA_SALTY Outer-membrane lipoprotein carrier protein | 1  |                       | DATGNTPFMLIAR                     | 103 | 13 | 8  | 54.77  | b2b3b5b6y4y7y10y13                            | 1406.71 | 77.456  | 47436 | 2 | 703.86  | 0.00   |
| Q8ZQD4 LOLA_SALTY Outer-membrane lipoprotein carrier protein | 2  |                       | DGTIHQFSAVEQDDQR                  | 154 | 16 | 9  | 35.44  | b3b9*b9y2*y2y4y5y8y16                         | 1845.82 | 43.099  | 40579 | 3 | 615.94  | -9.52  |
| Q8ZQD4 LOLA_SALTY Outer-membrane lipoprotein carrier protein | 3  |                       | TLWFYNPFVEQATATWLK                | 85  | 18 | 17 | 125.11 | b2b3b4b5*b5b9b10*b10y3y4y5y10y12*y12y13y14y18 | 2215.14 | 115.353 | 36374 | 2 | 1108.07 | 7.94   |
| Q8ZQD4 LOLA_SALTY Outer-membrane lipoprotein carrier protein | 4  |                       | NQASDWQQYNIK                      | 116 | 12 | 6  | 36.17  | b1b3b11y9y10*y10                              | 1494.70 | 50.967  | 6286  | 2 | 747.86  | 4.90   |

|                                                              |    |                       |                                 |     |    |    |        |                                                                      |         |         |        |   |         |       |
|--------------------------------------------------------------|----|-----------------------|---------------------------------|-----|----|----|--------|----------------------------------------------------------------------|---------|---------|--------|---|---------|-------|
| Q8ZQD4 LOLA_SALTY Outer-membrane lipoprotein carrier protein | 5  |                       | FTFTPPQGVTTIDQRK                | 187 | 16 | 4  | 17.16  | b4y7y10y16                                                           | 1849.96 | 60.439  | 4380   | 2 | 925.48  | 7.85  |
| Q8ZQD4 LOLA_SALTY Outer-membrane lipoprotein carrier protein | 6  |                       | NQASDWQQYNIKQDGDNFVLTPK         | 116 | 23 | 6  | 35.31  | b3b4b12y10y14y20                                                     | 2709.31 | 66.860  | 39267  | 3 | 903.77  | 6.85  |
| Q8ZQD4 LOLA_SALTY Outer-membrane lipoprotein carrier protein | 7  |                       | SQQNGAVDPSKFTFTPPQGVTTIDQQR     | 176 | 26 | 9  | 52.84  | b5*b5b13y5y6y7y10y12y14                                              | 2833.41 | 68.137  | 3779   | 3 | 945.14  | 13.10 |
| Q8ZQD4 LOLA_SALTY Outer-membrane lipoprotein carrier protein | 8  | Phosphoryl STY(11)    | QFTINVGRDGTIHQFSAVEQDDQR        | 146 | 24 | 3  | 12.71  | b10y8y12                                                             | 2841.30 | 101.703 | 2759   | 3 | 947.77  | 6.19  |
| Q8ZQD4 LOLA_SALTY Outer-membrane lipoprotein carrier protein | 9  |                       | VEQDDQR                         | 163 | 7  | 1  | 7.25   | b4                                                                   | 889.41  | 43.055  | 1987   | 2 | 445.21  | 4.60  |
| P66738 RRF_SALTY Ribosome-recycling factor                   | 1  |                       | ASPSLLDGIVVEYYGTPTPLR           | 31  | 21 | 7  | 40.78  | b15y5y7y12y14y15y21                                                  | 2248.20 | 92.605  | 36960  | 2 | 1124.60 | 6.41  |
| P66738 RRF_SALTY Ribosome-recycling factor                   | 2  |                       | QLASVTVEDSR                     | 52  | 11 | 12 | 87.19  | b3*b3y2y3y4y5y6y8*y8y9y11*y11                                        | 1204.63 | 38.785  | 30724  | 2 | 602.82  | 10.44 |
| P66738 RRF_SALTY Ribosome-recycling factor                   | 3  |                       | AIMASDLGLNPSSAGTDIR             | 80  | 19 | 6  | 36.29  | b9y2y7y8y9y19                                                        | 1888.96 | 66.424  | 13876  | 2 | 944.99  | 11.05 |
| P66738 RRF_SALTY Ribosome-recycling factor                   | 4  |                       | VDAALADKEAELMQF                 | 170 | 15 | 3  | 18.14  | b7b12y10                                                             | 1650.81 | 84.202  | 5411   | 3 | 550.94  | 4.14  |
| P66738 RRF_SALTY Ribosome-recycling factor                   | 5  |                       | VDAALADK                        | 170 | 8  | 3  | 36.1   | b4b6y6                                                               | 802.44  | 35.611  | 5055   | 2 | 401.72  | 11.26 |
| P66738 RRF_SALTY Ribosome-recycling factor                   | 6  |                       | AIMASDLGLNPSSAGTDIRVPLPLTEER    | 80  | 29 | 9  | 39.92  | b4b7b11b15*b15y4y12y22y26                                            | 3020.58 | 85.626  | 52624  | 3 | 1007.53 | 3.31  |
| P66738 RRF_SALTY Ribosome-recycling factor                   | 7  |                       | IVRGAEAQAR                      | 115 | 10 | 8  | 70.55  | b3b6b7b8y4*y4y7*y7                                                   | 1128.61 | 15.605  | 18933  | 2 | 564.81  | -5.84 |
| P66738 RRF_SALTY Ribosome-recycling factor                   | 8  |                       | DAEVRMEK                        | 7   | 8  | 4  | 51.08  | b3b5y3y4                                                             | 977.46  | 21.960  | 7488   | 2 | 489.24  | -9.18 |
| P66738 RRF_SALTY Ribosome-recycling factor                   | 9  |                       | SMGPAVEKAIMASDLGLNPSSAGTDIR     | 72  | 27 | 4  | 22.55  | b9y6y10y11                                                           | 2688.37 | 66.281  | 5102   | 4 | 672.85  | 13.35 |
| P66738 RRF_SALTY Ribosome-recycling factor                   | 10 | Phosphoryl STY(7)     | VPLPLTEER                       | 99  | 10 | 4  | 26.91  | b8*b8y3y5_H3PO4 y5                                                   | 1230.60 | 26.573  | 4567   | 2 | 615.80  | -4.66 |
| O33921 AGP_SALTY Glucose-1-phohatase                         | 1  |                       | TPIGGQLVFQR                     | 335 | 11 | 6  | 36.73  | b2b6y3y8y9y11                                                        | 1215.68 | 60.304  | 115557 | 2 | 608.34  | -3.21 |
| O33921 AGP_SALTY Glucose-1-phohatase                         | 2  |                       | MGTMDPFTFNPVITDDSAAFR           | 141 | 20 | 19 | 130.81 | b2b3b5b12y2y3y5y6y7y8*y8y9*y9y11y12*y12y13y15y20                     | 2186.01 | 77.534  | 84532  | 2 | 1093.51 | 10.16 |
| O33921 AGP_SALTY Glucose-1-phohatase                         | 3  |                       | IEYVYQSAR                       | 358 | 9  | 7  | 74.92  | b2b3y3y5y6y7y8                                                       | 1128.56 | 41.349  | 54082  | 2 | 564.79  | -4.65 |
| O33921 AGP_SALTY Glucose-1-phohatase                         | 4  |                       | QQAVQAMEK                       | 161 | 9  | 9  | 45.47  | b2b3*b3b9y3y4*y4y7y9                                                 | 1032.50 | 25.315  | 50624  | 2 | 516.76  | -9.46 |
| O33921 AGP_SALTY Glucose-1-phohatase                         | 5  | Carbamidomethyl+C(14) | EWLV AQGLIPSGECPAPDTVYAYANSLQR  | 87  | 29 | 26 | 131.44 | b3*b3b8*b8b9*b9b12b14*b14b16y12y3y4y5*y5y6y7*y7y9y10*y10y12y13y15y29 | 3205.58 | 93.083  | 50051  | 3 | 1069.20 | 5.41  |
| O33921 AGP_SALTY Glucose-1-phohatase                         | 6  |                       | DTFSANYQQEPGVQGPLK              | 208 | 18 | 6  | 24.82  | b2b10y8y10y12y18                                                     | 1978.97 | 55.375  | 41498  | 2 | 989.99  | 11.29 |
| O33921 AGP_SALTY Glucose-1-phohatase                         | 7  |                       | VGNSLVDAFTLQYYEGFPMQVAVGGIHTDR  | 226 | 31 | 11 | 41.64  | b1b8b13y1y3y4y6*y6y7y14*y14                                          | 3486.67 | 103.748 | 34814  | 3 | 1162.89 | 7.28  |
| O33921 AGP_SALTY Glucose-1-phohatase                         | 8  |                       | APLANNGSVLAQSTPNAWPAWDVPGGQLTTK | 43  | 31 | 18 | 81.62  | b2b4b6b8b9b11b14*b14b17b18y2y3y8y10y13y14*y14y31                     | 3161.63 | 82.745  | 32950  | 3 | 1054.55 | 8.65  |
| O33921 AGP_SALTY Glucose-1-phohatase                         | 9  |                       | NGYQDSLFTSPTVAR                 | 266 | 15 | 6  | 25.8   | b3b13y1y5y11y15                                                      | 1655.81 | 61.860  | 30083  | 2 | 828.41  | 5.82  |
| O33921 AGP_SALTY Glucose-1-phohatase                         | 10 |                       | NVAAPLVK                        | 281 | 8  | 4  | 40.87  | y3y4y6y8                                                             | 811.50  | 38.992  | 27095  | 2 | 406.25  | -9.70 |

|                                             |    |                                                |                                         |     |    |    |        |                                                                          |         |         |       |   |         |        |
|---------------------------------------------|----|------------------------------------------------|-----------------------------------------|-----|----|----|--------|--------------------------------------------------------------------------|---------|---------|-------|---|---------|--------|
| O33921 AGP_SALTY Glucose-1-phohatase        | 11 | Carbamidomethyl+C(14)                          | LLEQITHYQDSPSCK                         | 182 | 15 | 7  | 41.48  | y5°y5y8y10*y10y13y15                                                     | 1818.86 | 50.390  | 26747 | 3 | 606.96  | -4.70  |
| O33921 AGP_SALTY Glucose-1-phohatase        | 12 |                                                | GGVLEVYMGHYTR                           | 74  | 13 | 3  | 25.41  | b9y6y7                                                                   | 1481.70 | 63.233  | 23972 | 3 | 494.57  | -10.87 |
| O33921 AGP_SALTY Glucose-1-phohatase        | 13 | Carbamidomethyl+C(16)                          | TVATAQFFITGAFPGCDIPVHHQE<br>K           | 116 | 25 | 8  | 31.98  | b12b14°b14y5y9y12y13*y<br>13                                             | 2771.41 | 99.982  | 10238 | 3 | 924.47  | 17.35  |
| O33921 AGP_SALTY Glucose-1-phohatase        | 14 | Carbamidomethyl+C(2);<br>Carbamidomethyl+C(10) | GCPVDANGFCPLDKFDNMNTA<br>AK             | 389 | 24 | 9  | 63.72  | b4b14y4y10y13y14y19y20<br>y22                                            | 2641.19 | 77.552  | 96304 | 3 | 881.07  | 1.94   |
| O33921 AGP_SALTY Glucose-1-phohatase        | 15 |                                                | LKNGYQDSLFTSPTVAR                       | 264 | 17 | 6  | 42.76  | b7b12y5y8y11y12                                                          | 1896.96 | 57.618  | 40706 | 3 | 632.99  | -8.94  |
| O33921 AGP_SALTY Glucose-1-phohatase        | 16 |                                                | VGNSLVDAFTLQYYEGFPMDDQVA<br>WGGIHTDRQWK | 226 | 34 | 12 | 36.88  | b4*b4b5b8°b8b12°b12y7°y<br>7y8y10°y10                                    | 3928.88 | 83.476  | 15261 | 3 | 1310.30 | 2.36   |
| O33921 AGP_SALTY Glucose-1-phohatase        | 17 | Carbamidomethyl+C(24)                          | SQLHLDESYKLEQITHYQDSPSC<br>K            | 172 | 25 | 4  | 18.84  | b4b6b9y3                                                                 | 3019.45 | 84.047  | 3784  | 4 | 755.62  | 0.65   |
| O33921 AGP_SALTY Glucose-1-phohatase        | 18 |                                                | ARSQLHLDESYK                            | 170 | 12 | 3  | 22.28  | b5y7y9                                                                   | 1446.73 | 35.321  | 2497  | 3 | 482.91  | -4.22  |
| O33921 AGP_SALTY Glucose-1-phohatase        | 19 | Oxidation+M(19)                                | VGNSLVDAFTLQYYEGFPMDDQVA<br>WGGIHTDR    | 226 | 31 | 4  | 11.25  | b14y5y8°y8                                                               | 3502.65 | 83.443  | 12335 | 4 | 876.42  | 2.65   |
| P0A7K0 RL11_SALTY 50S ribosomal protein L11 | 1  |                                                | AQLQEIAQTK                              | 103 | 10 | 17 | 83.77  | b1b2*b2b3b4*b4b6y1y2y5<br>y6°y6y7°y7*y7y8y10                             | 1129.62 | 37.838  | 70052 | 2 | 565.31  | -3.24  |
| P0A7K0 RL11_SALTY 50S ribosomal protein L11 | 2  |                                                | AADMTGADIEAMTR                          | 113 | 14 | 14 | 92.08  | b1b2b3y3y4y5°y5y6y7°y7y<br>8°y8y12y14                                    | 1452.66 | 56.177  | 59650 | 2 | 726.83  | 8.32   |
| P0A7K0 RL11_SALTY 50S ribosomal protein L11 | 3  |                                                | SFTFVTK                                 | 65  | 7  | 5  | 37.46  | b5y2y5y6y7                                                               | 829.45  | 52.513  | 38485 | 2 | 415.23  | 0.59   |
| P0A7K0 RL11_SALTY 50S ribosomal protein L11 | 4  | Carbamidomethyl+C(29)                          | LQVAAGMANPSPVGPALGQQG<br>VNIMEFCK       | 10  | 30 | 3  | 11.38  | b4b8y7                                                                   | 3081.56 | 110.285 | 9006  | 4 | 771.14  | 8.32   |
| P0A7K0 RL11_SALTY 50S ribosomal protein L11 | 5  |                                                | TDSIEK                                  | 45  | 6  | 2  | 26.85  | b4b5                                                                     | 692.34  | 96.015  | 2740  | 1 | 692.34  | -5.99  |
| P0A7K0 RL11_SALTY 50S ribosomal protein L11 | 6  |                                                | AQLQEIAQTKAADMTGADIEAMT<br>R            | 103 | 24 | 3  | 22     | b15y5y6                                                                  | 2563.28 | 85.156  | 2698  | 4 | 641.58  | 12.86  |
| P0A7K0 RL11_SALTY 50S ribosomal protein L11 | 7  | Carbamidomethyl+C(29)<br>;Oxidation+M(7)       | LQVAAGMANPSPVGPALGQQG<br>VNIMEFCK       | 10  | 30 | 9  | 25.58  | b7*b7b11°b11*b11b13b14<br>*b14y10                                        | 3097.51 | 136.388 | 2787  | 2 | 1549.26 | -5.04  |
| P0A1V4 KAD_SALTY Adenylate kinase           | 1  |                                                | LVEYHQMTAPLIGYYQK                       | 167 | 17 | 22 | 111.7  | b7°b7b11°b11*b11b16y1y<br>2*y2y5y6*y6y7y8y10y11°y<br>11y12°y12*y12y15y17 | 2054.04 | 68.165  | 57438 | 3 | 685.35  | -2.73  |
| P0A1V4 KAD_SALTY Adenylate kinase           | 2  |                                                | VDGTQAVADVR                             | 195 | 11 | 8  | 27.32  | b1b3°b3b4°b4y2y4y11                                                      | 1130.58 | 35.488  | 40761 | 2 | 565.79  | 0.86   |
| P0A1V4 KAD_SALTY Adenylate kinase           | 3  |                                                | YGIPQISTGDMLR                           | 23  | 13 | 10 | 84.98  | b2b6y3y4y7°y7y8y10y12y1<br>3                                             | 1450.74 | 71.718  | 38591 | 2 | 725.87  | 1.68   |
| P0A1V4 KAD_SALTY Adenylate kinase           | 4  |                                                | IILLGAPGAGK                             | 2   | 11 | 11 | 100.41 | b2b3y2y3y4y5y6y7y8y9y1<br>1                                              | 1009.63 | 59.989  | 32550 | 2 | 505.32  | -7.98  |
| P0A1V4 KAD_SALTY Adenylate kinase           | 5  |                                                | NGFLLDGFPR                              | 78  | 10 | 3  | 26.91  | b3y4y6                                                                   | 1135.58 | 79.727  | 25324 | 2 | 568.30  | -5.48  |
| P0A1V4 KAD_SALTY Adenylate kinase           | 6  |                                                | EAGIVVDYVLEFDVPDELIVDR                  | 97  | 22 | 5  | 20.87  | b4°b4b8b12y7                                                             | 2505.22 | 110.737 | 4039  | 3 | 835.74  | -22.22 |
| P0A1V4 KAD_SALTY Adenylate kinase           | 7  |                                                | IILLGAPGAGKGTQAQFIMEK                   | 2   | 21 | 7  | 53.33  | b3y5y9y11y12y15y17                                                       | 2143.18 | 71.710  | 12439 | 3 | 715.06  | -8.66  |
| P0A1V4 KAD_SALTY Adenylate kinase           | 8  |                                                | GTQAQFIMEKYGIPQISTGDMLR                 | 13  | 23 | 4  | 20.12  | b15y6y8y22                                                               | 2584.26 | 74.585  | 8202  | 3 | 862.09  | -10.30 |
| P0A1V4 KAD_SALTY Adenylate kinase           | 9  |                                                | YAKVDGTQAVADVR                          | 192 | 14 | 4  | 19.29  | b5b13y10°y10                                                             | 1492.76 | 70.452  | 7541  | 2 | 746.88  | -10.96 |
| P0A1V4 KAD_SALTY Adenylate kinase           | 10 |                                                | VEGKDDVTGEDLTTR                         | 141 | 15 | 5  | 31.82  | b7b12y10y11°y11                                                          | 1634.81 | 70.474  | 4934  | 3 | 545.61  | 11.20  |
| P0A1V4 KAD_SALTY Adenylate kinase           | 11 | Oxidation+M(7)                                 | LVEYHQMTAPLIGYYQKEAEAGN<br>TK           | 167 | 25 | 4  | 12.41  | b3b22y12*y12                                                             | 2870.44 | 90.139  | 3638  | 3 | 957.49  | 14.46  |

|                                                        |    |                   |                                       |     |    |    |        |                                      |         |         |        |   |         |        |
|--------------------------------------------------------|----|-------------------|---------------------------------------|-----|----|----|--------|--------------------------------------|---------|---------|--------|---|---------|--------|
| Q7CR87 SURA_SALTY Chaperone surA                       | 1  |                   | IQELPGIFAQALSTAK                      | 235 | 16 | 14 | 70.76  | b2*b2b3*b3b4*b4*b4y2y3y4y12y13y14y16 | 1686.95 | 89.120  | 69909  | 2 | 843.98  | 5.64   |
| Q7CR87 SURA_SALTY Chaperone surA                       | 2  |                   | ITVLPQEV DALAK                        | 149 | 13 | 14 | 62.73  | b2*b2b3*b3y1y2y5y8*y8y9*y9*y9y10y11  | 1396.81 | 69.614  | 40117  | 2 | 698.91  | 0.35   |
| Q7CR87 SURA_SALTY Chaperone surA                       | 3  |                   | LIMDQIILQM GQK                        | 73  | 13 | 7  | 74.77  | y3y4y5y6y7y11y13                     | 1530.84 | 87.272  | 36751  | 2 | 765.93  | 3.35   |
| Q7CR87 SURA_SALTY Chaperone surA                       | 4  |                   | LNAGQAGQQLPDDATLR                     | 50  | 17 | 15 | 113.63 | b2b3b4*b4y1y2y4y5y6y7y8y9y11y12y17   | 1767.91 | 49.709  | 31908  | 2 | 884.46  | 5.11   |
| Q7CR87 SURA_SALTY Chaperone surA                       | 5  |                   | GQSQSI SVTE VHAR                      | 274 | 14 | 5  | 31.54  | b3y6y8y10y14                         | 1498.75 | 35.823  | 25397  | 3 | 500.25  | -10.02 |
| Q7CR87 SURA_SALTY Chaperone surA                       | 6  |                   | VAAVVNNGVVLES DVDGLMQSVK              | 27  | 23 | 9  | 33.91  | b1b3b4b14b17y8y11*y11y23             | 2343.24 | 90.204  | 24517  | 2 | 1172.13 | 9.06   |
| Q7CR87 SURA_SALTY Chaperone surA                       | 7  |                   | EYSQDPGSANQG GDLGWATPDIFDPAFR         | 326 | 28 | 6  | 22.73  | b2*b2y4y11y12y28                     | 3011.38 | 92.869  | 11411  | 3 | 1004.46 | 11.35  |
| Q7CR87 SURA_SALTY Chaperone surA                       | 8  |                   | LEEIAADIK                             | 306 | 9  | 4  | 30.49  | b5b7y4y9                             | 1001.54 | 39.714  | 6038   | 2 | 501.28  | -8.23  |
| Q7CR87 SURA_SALTY Chaperone surA                       | 9  |                   | ITDEQLDQA IANIAK                      | 90  | 15 | 4  | 25.8   | b4b13y5y13                           | 1642.87 | 79.384  | 46056  | 2 | 821.94  | 5.57   |
| Q7CR87 SURA_SALTY Chaperone surA                       | 10 |                   | QAESIVEEAR                            | 197 | 10 | 4  | 40.13  | b8y4y5y8                             | 1131.59 | 37.016  | 44332  | 2 | 566.30  | 19.42  |
| Q7CR87 SURA_SALTY Chaperone surA                       | 11 |                   | LAYDGLNYSTYR                          | 117 | 12 | 4  | 29.48  | y4*y4y7y8                            | 1435.70 | 57.260  | 38011  | 2 | 718.35  | 8.76   |
| Q7CR87 SURA_SALTY Chaperone surA                       | 12 |                   | QIGTQNDASTE LNL SHILIALPENPTSEQVNDAQR | 162 | 35 | 4  | 16.63  | y3y5y9*y9                            | 3816.94 | 87.903  | 28091  | 3 | 1272.99 | 10.62  |
| Q7CR87 SURA_SALTY Chaperone surA                       | 13 |                   | GQISAPVHSSFG WHLIELLDTR               | 362 | 22 | 4  | 22.19  | b13*b13b14y3                         | 2463.24 | 115.806 | 2299   | 4 | 616.57  | -13.97 |
| Q7CR87 SURA_SALTY Chaperone surA                       | 14 |                   | LAITYSADQ QALKGGQMGWGR                | 214 | 21 | 3  | 13.88  | b3y8y16                              | 2251.12 | 64.087  | 24846  | 3 | 751.05  | -2.93  |
| Q7CR87 SURA_SALTY Chaperone surA                       | 15 |                   | AYRMLMNR                              | 396 | 8  | 3  | 33.09  | b6y3y4                               | 1054.52 | 49.063  | 18927  | 2 | 527.77  | -5.09  |
| Q7CR87 SURA_SALTY Chaperone surA                       | 16 |                   | KFSEE AATWMQEQR                       | 404 | 14 | 3  | 19.29  | b6b9y10                              | 1740.82 | 55.527  | 7646   | 2 | 870.91  | 11.92  |
| Q7CR87 SURA_SALTY Chaperone surA                       | 17 |                   | VNDLRGQSQSI SVTE VHAR                 | 269 | 19 | 3  | 14.94  | b4b12y3                              | 2096.07 | 42.958  | 4866   | 4 | 524.77  | -7.22  |
| Q7CR87 SURA_SALTY Chaperone surA                       | 18 |                   | FSEE AATWMQEQRASAYVK                  | 405 | 19 | 3  | 14.94  | b5y4y13                              | 2232.06 | 103.839 | 1937   | 3 | 744.69  | 11.59  |
| Q7CR87 SURA_SALTY Chaperone surA                       | 19 |                   | LNAGQAGQQLPDDATL                      | 50  | 16 | 1  | 7.28   | y12                                  | 1611.78 | 49.758  | 4183   | 2 | 806.40  | -8.03  |
| Q7CR87 SURA_SALTY Chaperone surA                       | 20 |                   | GQSQSI SVTE VHAR                      | 274 | 14 | 0  | 3.64   |                                      | 1481.74 | 35.805  | 2629   | 3 | 494.59  | 7.00   |
| P66313 RL6_SALTY 50S ribosomal protein L6              | 1  |                   | APVVVPAGVDVK                          | 6   | 12 | 12 | 111.81 | b2b3b4b5y2y3y6y7y8y9y10y12           | 1150.68 | 52.195  | 108813 | 2 | 575.84  | -4.99  |
| P66313 RL6_SALTY 50S ribosomal protein L6              | 2  |                   | ALLNSM VIGVTEGFTK                     | 69  | 16 | 10 | 82.01  | b2b14y4y6y7y8y9y12y13y16             | 1679.91 | 93.566  | 52744  | 2 | 840.46  | 0.80   |
| P66313 RL6_SALTY 50S ribosomal protein L6              | 3  |                   | RPEPYK                                | 152 | 6  | 2  | 26.85  | y4y5                                 | 789.42  | 50.466  | 9343   | 2 | 395.21  | -9.97  |
| P66313 RL6_SALTY 50S ribosomal protein L6              | 4  |                   | TLNDAVEVKHADNALT FGPR                 | 35  | 20 | 3  | 14.37  | b3b6y3                               | 2168.11 | 62.642  | 2230   | 3 | 723.38  | 1.35   |
| P66313 RL6_SALTY 50S ribosomal protein L6              | 5  |                   | GVRYADEVVR                            | 160 | 10 | 3  | 26.91  | b6b9y5                               | 1163.62 | 69.804  | 2088   | 2 | 582.31  | 1.47   |
| P66313 RL6_SALTY 50S ribosomal protein L6              | 6  | Phosphoryl STY(5) | ALLNSM VIGVTEGFTKK                    | 69  | 17 | 6  | 27.4   | b4b12_H3PO4b12*b12b13*b13y13         | 1887.96 | 98.189  | 14548  | 2 | 944.49  | 4.14   |
| P0A2C5 RBSB_SALTY D-ribose-binding periplasmic protein | 1  |                   | ILLINPTDS DAVGNAVK                    | 84  | 17 | 12 | 83.13  | b2b3b4b5y2y9y11y12*y12y13y14y17      | 1739.96 | 69.808  | 92488  | 2 | 870.49  | 5.75   |
| P0A2C5 RBSB_SALTY D-ribose-binding periplasmic protein | 2  |                   | IPVITLDR                              | 107 | 8  | 6  | 54.09  | y1y3y4y5y6y8                         | 926.56  | 60.765  | 69770  | 2 | 463.78  | -10.87 |
| P0A2C5 RBSB_SALTY D-ribose-binding periplasmic protein | 3  |                   | LAATIAQLPDQIGAK                       | 253 | 15 | 10 | 69.26  | b2b3b4*b4y3y4y7y8y10y15              | 1509.87 | 65.321  | 63254  | 2 | 755.44  | 2.34   |

|                                                         |    |                       |                                  |     |    |    |        |                                                 |         |         |       |   |         |        |
|---------------------------------------------------------|----|-----------------------|----------------------------------|-----|----|----|--------|-------------------------------------------------|---------|---------|-------|---|---------|--------|
| [P0A2C5]RBSB_SALTY D-ribose-binding periplasmic protein | 4  |                       | ELANVQDLTVR                      | 70  | 11 | 5  | 36.73  | b7y5y6y8y11                                     | 1257.67 | 56.553  | 40784 | 2 | 629.34  | -4.37  |
| [P0A2C5]RBSB_SALTY D-ribose-binding periplasmic protein | 5  |                       | ADVMVVGFDGTPDGEK                 | 231 | 16 | 7  | 51.52  | b4b5y5y7y10y11°y11                              | 1636.77 | 62.534  | 29318 | 2 | 818.89  | 12.98  |
| [P0A2C5]RBSB_SALTY D-ribose-binding periplasmic protein | 6  |                       | VIELQGIAGTSAAR                   | 150 | 14 | 14 | 92.08  | b2b3y4y6y7°y7y9y10y11*y11y12°y12*y12y14         | 1385.78 | 57.875  | 26227 | 2 | 693.39  | 3.35   |
| [P0A2C5]RBSB_SALTY D-ribose-binding periplasmic protein | 7  |                       | FNVLASQPADFDR                    | 178 | 13 | 7  | 62.73  | b3y3y6y8y9y10y13                                | 1479.73 | 65.303  | 26081 | 2 | 740.37  | 3.71   |
| [P0A2C5]RBSB_SALTY D-ribose-binding periplasmic protein | 8  |                       | GLNVMQNLLTAHPDVQAVFAQN DEMALGALR | 193 | 31 | 13 | 32.74  | b4*b4b6*b6b14*b14y1y4y12°y12y13y15y31           | 3336.70 | 102.038 | 21754 | 3 | 1112.90 | 3.95   |
| [P0A2C5]RBSB_SALTY D-ribose-binding periplasmic protein | 9  |                       | IAGDYIAK                         | 135 | 8  | 6  | 33.09  | b7y1y2y6y7y8                                    | 850.46  | 34.637  | 16393 | 2 | 425.73  | -8.11  |
| [P0A2C5]RBSB_SALTY D-ribose-binding periplasmic protein | 10 |                       | YPVDLK                           | 285 | 6  | 1  | 13.62  | b4                                              | 734.40  | 41.212  | 14554 | 2 | 367.70  | -14.29 |
| [P0A2C5]RBSB_SALTY D-ribose-binding periplasmic protein | 11 |                       | LVIK                             | 291 | 4  | 1  | 12.82  | y3                                              | 472.35  | 55.185  | 10370 | 1 | 472.35  | -3.68  |
| [P0A2C5]RBSB_SALTY D-ribose-binding periplasmic protein | 12 |                       | EADKLGYNLVVLDSQNNPAK             | 50  | 20 | 5  | 19.76  | b5b10y5y9°y9                                    | 2188.12 | 65.128  | 24910 | 3 | 730.04  | -2.79  |
| [P0A2C5]RBSB_SALTY D-ribose-binding periplasmic protein | 13 |                       | FNVLASQPADFDRTK                  | 178 | 15 | 3  | 26.22  | y7y10y11                                        | 1708.85 | 59.031  | 10798 | 3 | 570.29  | -9.50  |
| [P0A2C5]RBSB_SALTY D-ribose-binding periplasmic protein | 14 | Oxidation+M(5)        | GLNVMQNLLTAHPDVQAVFAQN DEMALGALR | 193 | 31 | 5  | 22.04  | b14*b14b15y11*y11                               | 3352.67 | 83.448  | 2426  | 3 | 1118.23 | -3.42  |
| [P0A2C5]RBSB_SALTY D-ribose-binding periplasmic protein | 15 |                       | GLNVMQNLLTAHPDVQAVFAQN DEMALGA   | 193 | 29 | 1  | 9.58   | y12                                             | 3067.52 | 102.098 | 1658  | 3 | 1023.18 | 8.04   |
| [O54297]RS4_SALTY 30S ribosomal protein S4              | 1  |                       | VVNIASYQVSPNDVVSIR               | 128 | 18 | 17 | 122.68 | b3b8b10b15b17y1y3y4y8*y9y10y11*y11y13°y13y14y18 | 1960.07 | 71.207  | 61346 | 2 | 980.54  | 10.84  |
| [O54297]RS4_SALTY 30S ribosomal protein S4              | 2  |                       | GNTGENLLALLEGR                   | 83  | 14 | 5  | 27.86  | b3*b3b5b9°b9                                    | 1456.78 | 85.225  | 5291  | 2 | 728.89  | 4.52   |
| [O54297]RS4_SALTY 30S ribosomal protein S4              | 3  |                       | AALELAEQR                        | 156 | 9  | 5  | 45.47  | b3y3y4°y4y7                                     | 1000.53 | 42.087  | 6061  | 1 | 1000.53 | -8.17  |
| [O54297]RS4_SALTY 30S ribosomal protein S4              | 4  |                       | IEQAPGQHGAR                      | 33  | 11 | 10 | 94.39  | b4b6*b6b7y4y5y6y7*y7y8                          | 1163.57 | 15.482  | 2941  | 3 | 388.53  | -15.21 |
| [O54297]RS4_SALTY 30S ribosomal protein S4              | 5  |                       | SDLSADINEHLIVELYSK               | 188 | 18 | 6  | 32.75  | b6b10b11y3°y3y13                                | 2046.04 | 83.519  | 1536  | 3 | 682.68  | -1.01  |
| [O54297]RS4_SALTY 30S ribosomal protein S4              | 6  | Carbamidomethyl+C(1)  | CKIEQAPGQHGAR                    | 31  | 13 | 3  | 28.12  | b8b10b11                                        | 1451.73 | 69.869  | 1817  | 2 | 726.37  | 10.93  |
| [P77983]KPYK1_SALTY Pyruvate kinase I                   | 1  |                       | GDLGVEIPVEEVIFAQK                | 244 | 17 | 10 | 83.01  | b3b5b6b7b12y4y10y11y12y17                       | 1842.99 | 94.049  | 34606 | 2 | 922.00  | 2.25   |
| [P77983]KPYK1_SALTY Pyruvate kinase I                   | 2  |                       | MLDAGMNVMR                       | 22  | 10 | 8  | 51.89  | b2y2y4y7y8°y8y9y10                              | 1137.52 | 56.140  | 20073 | 2 | 569.27  | 3.11   |
| [P77983]KPYK1_SALTY Pyruvate kinase I                   | 3  | Carbamidomethyl+C(13) | YPLEAVSIMATICER                  | 319 | 15 | 5  | 29.44  | b6°b6b10b12y12                                  | 1752.87 | 81.813  | 13341 | 2 | 876.94  | 4.25   |
| [P77983]KPYK1_SALTY Pyruvate kinase I                   | 4  |                       | IENQEGLNNFDEILEASDGIMVAR         | 220 | 24 | 10 | 28.74  | b6*b6y1y2y3y4y6y9°y9y24                         | 2677.29 | 95.610  | 13054 | 3 | 893.10  | 5.56   |
| [P77983]KPYK1_SALTY Pyruvate kinase I                   | 5  |                       | AEAGDVANAILDGTDAVMLSGES AK       | 292 | 25 | 7  | 37.69  | b3b10b11y3y11y12y25                             | 2405.18 | 91.330  | 10375 | 2 | 1203.09 | 11.47  |
| [P77983]KPYK1_SALTY Pyruvate kinase I                   | 6  | Carbamidomethyl+C(6)  | ITEAVCR                          | 353 | 7  | 3  | 40.47  | y3y5y6                                          | 848.42  | 24.074  | 9383  | 2 | 424.71  | -8.49  |
| [P77983]KPYK1_SALTY Pyruvate kinase I                   | 7  |                       | AGQTFTFITDK                      | 86  | 11 | 6  | 47.74  | b4b5*b5b7y5y9                                   | 1216.58 | 58.370  | 6513  | 3 | 406.20  | -5.72  |
| [P77983]KPYK1_SALTY Pyruvate kinase I                   | 8  |                       | VVITATQMLDSMIK                   | 272 | 14 | 3  | 34.85  | b10b11b12                                       | 1549.83 | 100.894 | 4830  | 2 | 775.42  | -0.32  |
| [P77983]KPYK1_SALTY Pyruvate kinase I                   | 9  | Carbamidomethyl+C(3)  | IVCTIGPK                         | 5   | 8  | 4  | 33.09  | b5°b5y5y6                                       | 887.49  | 34.941  | 18942 | 2 | 444.25  | -11.07 |
| [P77983]KPYK1_SALTY Pyruvate kinase I                   | 10 |                       | LNFSHGDYAEHGQR                   | 32  | 14 | 4  | 31.54  | b3b9b12y5                                       | 1630.76 | 79.580  | 7190  | 3 | 544.26  | 15.64  |



|                                                     |    |                                          |                                                          |     |    |    |        |                                                                                                                 |         |         |       |   |         |        |
|-----------------------------------------------------|----|------------------------------------------|----------------------------------------------------------|-----|----|----|--------|-----------------------------------------------------------------------------------------------------------------|---------|---------|-------|---|---------|--------|
| P77983 KPYK1_SALTY Pyruvate kinase I                | 11 |                                          | MMIEK                                                    | 261 | 5  | 1  | 13.22  | y3                                                                                                              | 651.32  | 51.090  | 2918  | 1 | 651.32  | -2.25  |
| P77983 KPYK1_SALTY Pyruvate kinase I                | 12 | Carbamidomethyl+C(13)                    | YPLEAVSIMATICERTDR                                       | 319 | 18 | 3  | 22.98  | b5b6y14                                                                                                         | 2125.02 | 68.631  | 21534 | 3 | 709.01  | -8.04  |
| P77983 KPYK1_SALTY Pyruvate kinase I                | 13 | Carbamidomethyl+C(15)                    | GKYPLEAVSIMATICER                                        | 317 | 17 | 7  | 32.76  | b4b6°b6b16y3y7°y7                                                                                               | 1937.98 | 110.929 | 3559  | 2 | 969.49  | -3.28  |
| P77983 KPYK1_SALTY Pyruvate kinase I                | 14 |                                          | TDRVMNSR                                                 | 334 | 8  | 5  | 33.09  | b5b6°b6y5*y5                                                                                                    | 978.49  | 136.384 | 3248  | 1 | 978.49  | 10.11  |
| P77983 KPYK1_SALTY Pyruvate kinase I                | 15 | Carbamidomethyl+C(3)                     | IVCTIGPKTESEEMLSK                                        | 5   | 17 | 3  | 16.32  | b4b11y13                                                                                                        | 1921.96 | 95.248  | 2453  | 3 | 641.33  | 1.33   |
| P77983 KPYK1_SALTY Pyruvate kinase I                | 16 | Carbamidomethyl+C(6)                     | MMIEKCIR                                                 | 261 | 8  | 5  | 67.31  | b3b5y3y5y6                                                                                                      | 1080.54 | 37.875  | 1705  | 2 | 540.77  | 3.50   |
| P77983 KPYK1_SALTY Pyruvate kinase I                | 17 | Oxidation+M(6)                           | GDVVVMVSGALVPSGTTNTASV<br>HVL                            | 445 | 25 | 4  | 12.41  | b9b11y12°y12                                                                                                    | 2426.23 | 103.973 | 3546  | 3 | 809.42  | -11.07 |
| O68901 SODC_SALTY Superoxide<br>dismutase [Cu-Zn] 2 | 1  |                                          | ALMIHVGGDNMSDQPKPLGGGG<br>MR                             | 142 | 24 | 13 | 91.22  | b6b9b10b11y1y3y4y5y8y1<br>0y20y22y24                                                                            | 2438.14 | 58.484  | 66874 | 4 | 610.29  | -12.42 |
| O68901 SODC_SALTY Superoxide<br>dismutase [Cu-Zn] 2 | 2  |                                          | SLDEVKDK                                                 | 134 | 8  | 6  | 49.32  | b2b4b6b7y6y8                                                                                                    | 933.48  | 20.484  | 11367 | 2 | 467.24  | -8.96  |
| O68901 SODC_SALTY Superoxide<br>dismutase [Cu-Zn] 2 | 3  |                                          | VEMNLVTAQGVGQSIGTVVIDET<br>EGGLK                         | 23  | 28 | 3  | 11.71  | b5y6y9                                                                                                          | 2844.47 | 98.822  | 5939  | 3 | 948.83  | 2.66   |
| O68901 SODC_SALTY Superoxide<br>dismutase [Cu-Zn] 2 | 4  | Carbamidomethyl+C(3)                     | YACGVIK                                                  | 166 | 7  | 3  | 40.47  | y4y5y6                                                                                                          | 810.41  | 33.501  | 69172 | 2 | 405.71  | -11.07 |
| O68901 SODC_SALTY Superoxide<br>dismutase [Cu-Zn] 2 | 5  | Carbamidomethyl+C(17)                    | ALPPGEHGFHIIHANGSCQPAIK                                  | 57  | 22 | 3  | 19.95  | b7b10b15                                                                                                        | 2338.13 | 81.977  | 14429 | 3 | 780.05  | -9.29  |
| O68901 SODC_SALTY Superoxide<br>dismutase [Cu-Zn] 2 | 6  |                                          | AVAAEAAGGHLDPQNTGK                                       | 82  | 18 | 9  | 52.78  | y6y7°y7*y7y8°y8y9*y9y11                                                                                         | 1706.83 | 33.550  | 4891  | 3 | 569.62  | -8.73  |
| O68901 SODC_SALTY Superoxide<br>dismutase [Cu-Zn] 2 | 7  | Carbamidomethyl+C(11)                    | LSLAMVTLLACAGAQAASEK                                     | 3   | 20 | 3  | 14.37  | b5b7y9                                                                                                          | 2005.02 | 117.061 | 2406  | 2 | 1003.01 | -14.06 |
| O68901 SODC_SALTY Superoxide<br>dismutase [Cu-Zn] 2 | 8  |                                          | SLDEVK                                                   | 134 | 6  | 3  | 26.85  | b3°b3y4                                                                                                         | 690.36  | 44.523  | 2263  | 1 | 690.36  | -8.40  |
| O68901 SODC_SALTY Superoxide<br>dismutase [Cu-Zn] 2 | 9  |                                          | AVAAEAAGGHLDPQNTGKHGEP<br>GQGHLDLPVLVNNNDGIASEPV<br>TAPR | 82  | 50 | 34 | 276.71 | b3b4b5°b5b6b7b10b11°b1<br>1b12b13b15b30b31b33b34<br>b35b36b40y4y5y6y7y8y9y<br>11y12°y12y13y14°y14*y14<br>y15y24 | 4962.47 | 68.169  | 47146 | 5 | 993.30  | -1.48  |
| O68901 SODC_SALTY Superoxide<br>dismutase [Cu-Zn] 2 | 10 | Oxidation+M(23)                          | ALMIHVGGDNMSDQPKPLGGGG<br>MR                             | 142 | 24 | 3  | 12.71  | b5b10y3                                                                                                         | 2454.16 | 54.996  | 21810 | 4 | 614.30  | -2.19  |
| O68901 SODC_SALTY Superoxide<br>dismutase [Cu-Zn] 2 | 11 | Carbamidomethyl+C(11)<br>;Oxidation+M(5) | LSLAMVTLLACAGAQAASEK                                     | 3   | 20 | 4  | 14.37  | b11b14y13*y13                                                                                                   | 2021.02 | 80.694  | 14346 | 2 | 1011.02 | -8.27  |
| O68901 SODC_SALTY Superoxide<br>dismutase [Cu-Zn] 2 | 12 | Oxidation+M(3)                           | VEMNLVTAQGVGQSIGTVVIDET<br>EGGLK                         | 23  | 28 | 8  | 40.37  | b6°b6b7°b7b8b11b24y10                                                                                           | 2860.43 | 80.754  | 6744  | 3 | 954.15  | -11.44 |
| P66932 TIG_SALTY Trigger factor                     | 1  |                                          | NVALEEQAWEAVLAK                                          | 399 | 15 | 16 | 137.92 | b2b3b4b5b11b12b13y1y2y<br>3y5y10y11y12y13y15                                                                    | 1583.87 | 79.143  | 69229 | 2 | 792.44  | 2.62   |
| P66932 TIG_SALTY Trigger factor                     | 2  |                                          | ELPELTEEFIKR                                             | 243 | 12 | 12 | 77.59  | b7°b7b8°b8b10b11y1y2y3y<br>7y10°y10                                                                             | 1503.81 | 70.407  | 39114 | 2 | 752.41  | 4.06   |
| P66932 TIG_SALTY Trigger factor                     | 3  |                                          | ANDIDVPSALIDSEIDVLR                                      | 296 | 20 | 8  | 36.14  | b2°b2b3b4°b4y4y14y16                                                                                            | 2211.16 | 89.740  | 36154 | 3 | 737.72  | -1.99  |
| P66932 TIG_SALTY Trigger factor                     | 4  |                                          | FGVEDGSVAGLR                                             | 255 | 12 | 7  | 44.92  | b2y1y7y8y9y11y12                                                                                                | 1206.61 | 56.091  | 30031 | 2 | 603.81  | 1.11   |
| P66932 TIG_SALTY Trigger factor                     | 5  |                                          | INPAGAPNYVPGEYK                                          | 83  | 15 | 4  | 26.22  | b2y3y5y9                                                                                                        | 1589.80 | 49.779  | 26785 | 2 | 795.41  | 5.30   |
| P66932 TIG_SALTY Trigger factor                     | 6  |                                          | ANDIDVPSALIDSEIDVLR                                      | 296 | 19 | 13 | 59.29  | b2°b2b3b6b10°b10b14y1y<br>3y8y13y14y19                                                                          | 2055.07 | 93.887  | 19382 | 2 | 1028.04 | 6.18   |
| P66932 TIG_SALTY Trigger factor                     | 7  |                                          | ELFEEQAK                                                 | 334 | 8  | 4  | 36.1   | b4°b4b7y5                                                                                                       | 993.51  | 40.801  | 31215 | 2 | 497.26  | 19.97  |

|                                                  |    |                       |                                    |     |    |    |        |                                                                        |         |         |        |   |         |        |
|--------------------------------------------------|----|-----------------------|------------------------------------|-----|----|----|--------|------------------------------------------------------------------------|---------|---------|--------|---|---------|--------|
| P66932 TIG_SALTY Trigger factor                  | 8  |                       | VTITIAADSIETAVK                    | 14  | 15 | 3  | 18.14  | b9b11y9                                                                | 1531.82 | 75.287  | 3549   | 2 | 766.42  | -21.68 |
| P66932 TIG_SALTY Trigger factor                  | 9  |                       | MQVSVETTQGLGR                      | 0   | 13 | 3  | 20.64  | b4b8y9                                                                 | 1405.70 | 49.655  | 3084   | 2 | 703.35  | -6.86  |
| P66932 TIG_SALTY Trigger factor                  | 10 |                       | QQATWK                             | 146 | 6  | 1  | 13.62  | b5                                                                     | 761.40  | 62.806  | 2142   | 1 | 761.40  | 4.17   |
| P66932 TIG_SALTY Trigger factor                  | 11 |                       | ATDFVLAMGQGR                       | 181 | 12 | 3  | 29.48  | b8b9b11                                                                | 1265.63 | 68.136  | 1501   | 2 | 633.32  | -4.24  |
| P66932 TIG_SALTY Trigger factor                  | 12 |                       | QAAQRFGGNEK                        | 316 | 11 | 5  | 47.74  | b3b4b8y6y8                                                             | 1205.59 | 47.188  | 85963  | 2 | 603.30  | -11.75 |
| P66932 TIG_SALTY Trigger factor                  | 13 |                       | EKINPAGAPNYVPGEYK                  | 81  | 17 | 3  | 16.32  | b14y9y14                                                               | 1846.94 | 75.106  | 31313  | 3 | 616.32  | 2.12   |
| P66932 TIG_SALTY Trigger factor                  | 14 |                       | VTIDFTGSVDGEFEFGGKATDFVL<br>AMGQGR | 163 | 30 | 4  | 11.38  | b8y4*y4y13                                                             | 3133.47 | 78.368  | 18934  | 3 | 1045.16 | -3.04  |
| P66932 TIG_SALTY Trigger factor                  | 15 | Phosphoryl STY(8)     | GLIEEMASAYEDPKEVIEFYK              | 368 | 22 | 4  | 22.19  | b6b7*b7y5                                                              | 2628.21 | 102.070 | 3298   | 3 | 876.74  | 14.96  |
| P66932 TIG_SALTY Trigger factor                  | 16 | Oxidation+M(1)        | MQVSVETTQGLGRR                     | 0   | 14 | 3  | 24.73  | b8b9y7                                                                 | 1577.80 | 62.248  | 4562   | 3 | 526.60  | -6.03  |
| P66932 TIG_SALTY Trigger factor                  | 17 |                       | ELPELTEEFIKR                       | 243 | 12 | 0  | 2.83   |                                                                        | 1485.78 | 70.406  | 18678  | 3 | 495.93  | -8.54  |
| P66170 RL29_SALTY 50S ribosomal<br>protein L29   | 1  |                       | MQAASGQLQQSHLLK                    | 29  | 15 | 24 | 161.44 | b1b2*b2b3b5b9b15y1y2y3<br>y4y5y6*y6y7*y7*y10y11<br>y12y13*y13y14y15    | 1639.84 | 43.740  | 157998 | 3 | 547.28  | -12.95 |
| P66170 RL29_SALTY 50S ribosomal<br>protein L29   | 2  |                       | SVEELNTELLNLLR                     | 9   | 14 | 12 | 72.84  | b2b4*b4y2y4y5y6y9*y9y10<br>y12y14                                      | 1642.91 | 100.242 | 126060 | 2 | 821.96  | 2.82   |
| P66170 RL29_SALTY 50S ribosomal<br>protein L29   | 3  |                       | EQFNLR                             | 23  | 6  | 4  | 26.85  | y3*y3y4*y4                                                             | 806.41  | 40.718  | 42332  | 2 | 403.71  | -7.72  |
| P66170 RL29_SALTY 50S ribosomal<br>protein L29   | 4  |                       | TLLTEK                             | 54  | 6  | 1  | 13.62  | y4                                                                     | 704.41  | 31.811  | 18260  | 1 | 704.41  | -11.61 |
| P66170 RL29_SALTY 50S ribosomal<br>protein L29   | 5  |                       | QAASGQLQQSHLLK                     | 30  | 14 | 2  | 14.92  | b8b11                                                                  | 1508.82 | 43.746  | 3222   | 3 | 503.61  | 4.53   |
| P66170 RL29_SALTY 50S ribosomal<br>protein L29   | 6  |                       | AASGQLQQSHLLK                      | 31  | 13 | 3  | 26.22  | b8b11b12                                                               | 1380.74 | 43.739  | 2847   | 2 | 690.88  | -10.52 |
| P0A1R8 DBHB_SALTY DNA-binding<br>protein HU-beta | 1  |                       | EITIAAAK                           | 67  | 8  | 9  | 62.54  | b3*b3y1y2y3y4y5y6y8                                                    | 816.47  | 37.283  | 103650 | 2 | 408.74  | -11.96 |
| P0A1R8 DBHB_SALTY DNA-binding<br>protein HU-beta | 2  |                       | ALDAIIASVTESLKEGDDVALVGF<br>GTFAVK | 23  | 30 | 7  | 62.2   | b2b4b5y6y7y8y9                                                         | 3036.61 | 136.125 | 28501  | 3 | 1012.87 | -1.69  |
| P0A1R8 DBHB_SALTY DNA-binding<br>protein HU-beta | 3  |                       | IAAGADISK                          | 9   | 9  | 8  | 102.61 | b5b6y3y4y5y6y7y8                                                       | 845.46  | 27.367  | 245299 | 2 | 423.23  | -19.78 |
| P0A1R8 DBHB_SALTY DNA-binding<br>protein HU-beta | 4  |                       | ALDAIIASVTESLKEGDDVALVGF<br>GTFAVK | 23  | 30 | 6  | 43.33  | b3b4b5y3y8y18                                                          | 3036.63 | 122.711 | 9186   | 3 | 1012.88 | 4.02   |
| P0A1R8 DBHB_SALTY DNA-binding<br>protein HU-beta | 5  | Phosphoryl STY(12)    | ALDAIIASVTESLK                     | 23  | 14 | 5  | 31.54  | b3b11b13y10*y10                                                        | 1510.79 | 114.209 | 11657  | 2 | 755.90  | 12.12  |
| P0A1R8 DBHB_SALTY DNA-binding<br>protein HU-beta | 6  |                       | EITIAAAK                           | 67  | 8  | 0  | 1.21   |                                                                        | 798.46  | 37.290  | 24743  | 2 | 399.73  | -8.71  |
| Q8ZP65 TPX_SALTY Probable thiol<br>peroxidase    | 1  |                       | SQTVHFQGNPVTVANVIPQAGSK            | 1   | 23 | 23 | 131.2  | b2*b2b3*b3b5*b5b9*b9b1<br>1b12*b12b13*b13b14y4y6°<br>y6y7y8y9y10y12y23 | 2379.24 | 63.460  | 114030 | 3 | 793.75  | -2.57  |
| Q8ZP65 TPX_SALTY Probable thiol<br>peroxidase    | 2  |                       | AQAFTLVAK                          | 24  | 9  | 9  | 79.18  | b3b5y1y2y3y4y6y7y9                                                     | 948.54  | 52.076  | 75384  | 2 | 474.77  | -11.07 |
| Q8ZP65 TPX_SALTY Probable thiol<br>peroxidase    | 3  | Carbamidomethyl+C(13) | VLNIFPSIDTGVCAASVR                 | 48  | 18 | 11 | 59.89  | b2b3b5b13b14y2y8y10y13<br>y14y18                                       | 1919.02 | 84.417  | 64887  | 2 | 960.01  | 8.21   |
| Q8ZP65 TPX_SALTY Probable thiol<br>peroxidase    | 4  | Carbamidomethyl+C(2)  | FCGAEGLSNVITLSTLR                  | 93  | 17 | 13 | 92.55  | b2b3b4b11*b11b12b15y4y<br>5y6y13y15y17                                 | 1837.96 | 85.265  | 64284  | 2 | 919.48  | 6.97   |
| Q8ZP65 TPX_SALTY Probable thiol<br>peroxidase    | 5  |                       | NYGVEIVDGPLK                       | 116 | 12 | 10 | 74.37  | b2*b2b3b4*b4y4y6y8y10y<br>12                                           | 1303.69 | 63.687  | 50453  | 2 | 652.35  | -1.12  |

|                                            |    |                      |                                     |     |    |    |        |                                                         |         |         |        |   |         |        |
|--------------------------------------------|----|----------------------|-------------------------------------|-----|----|----|--------|---------------------------------------------------------|---------|---------|--------|---|---------|--------|
| Q8ZP65 TPX_SALTY Probable thiol peroxidase | 6  |                      | AVIVLDENDNVIFSQLVDEITHEPDYDAALNVLKA | 133 | 35 | 20 | 134.82 | b3b4b5b10b11*b11b15y3y4y5y6y7y12*y12y13*y13y18y24y28y31 | 3882.99 | 119.690 | 56509  | 3 | 1295.00 | 7.23   |
| Q8ZP65 TPX_SALTY Probable thiol peroxidase | 7  |                      | AQAFTLVAK                           | 24  | 9  | 0  | 1.62   |                                                         | 931.51  | 52.107  | 7067   | 2 | 466.26  | -14.81 |
| P26982 DEGP_SALTY Protease do              | 1  |                      | AGDVITSLNGKPISSFAALR                | 332 | 20 | 12 | 90.69  | b3b4b5*b5y1y2y4y7y9y12y15y19                            | 2017.08 | 73.929  | 75430  | 3 | 673.03  | -12.59 |
| P26982 DEGP_SALTY Protease do              | 2  |                      | NLTSQMVEYGQVK                       | 275 | 13 | 9  | 43.1   | b2b6b10*b10y5y8y11*y11y13                               | 1496.76 | 56.534  | 53653  | 2 | 748.88  | 9.13   |
| P26982 DEGP_SALTY Protease do              | 3  |                      | GAFVSQVMPNSSAAK                     | 313 | 15 | 11 | 79.1   | b3b4b5y1y2y8y9y10y11*y11y15                             | 1493.75 | 52.133  | 43906  | 2 | 747.38  | 4.09   |
| P26982 DEGP_SALTY Protease do              | 4  |                      | VGDYTV AIGNPFLGETVTSGIVS ALGR       | 186 | 28 | 18 | 157.48 | b3b5b6b7b8*b8b9y1y2y3y4y5y6y7y8y9y10y28                 | 2750.44 | 115.946 | 35152  | 3 | 917.48  | -0.09  |
| P26982 DEGP_SALTY Protease do              | 5  |                      | AQVGTMPVGSK                         | 352 | 11 | 8  | 52.96  | b2*b2b6y5y7y8y9y11                                      | 1074.56 | 33.737  | 30797  | 2 | 537.78  | -4.54  |
| P26982 DEGP_SALTY Protease do              | 6  |                      | SGLNVENYENFIQTDAAINR                | 214 | 20 | 6  | 21.04  | b2y2y11y12*y12y20                                       | 2268.12 | 76.651  | 29617  | 2 | 1134.56 | 14.10  |
| P26982 DEGP_SALTY Protease do              | 7  |                      | ISLGLLR                             | 363 | 7  | 4  | 53.69  | y3y4y5y6                                                | 771.50  | 67.527  | 24094  | 2 | 386.26  | -7.83  |
| P26982 DEGP_SALTY Protease do              | 8  |                      | LADSDALR                            | 178 | 8  | 8  | 49.32  | b3y2y5*y5y6*y6y7y8                                      | 860.44  | 31.215  | 20675  | 2 | 430.72  | -12.06 |
| P26982 DEGP_SALTY Protease do              | 9  |                      | GELGIMGTELNSELAk                    | 289 | 16 | 6  | 24.26  | b5*b5b8y11y13*y13                                       | 1661.85 | 74.102  | 10163  | 2 | 831.43  | 7.05   |
| P26982 DEGP_SALTY Protease do              | 10 |                      | ILDSKPSVLALNIQR                     | 450 | 15 | 3  | 26.22  | y3y4y10                                                 | 1666.96 | 64.218  | 64893  | 3 | 556.32  | -15.38 |
| P26982 DEGP_SALTY Protease do              | 11 |                      | GYVVTNNHVVDNASVIK                   | 124 | 17 | 7  | 55.6   | b3b5b7y3y8y10y14                                        | 1828.93 | 48.957  | 43573  | 3 | 610.31  | -15.35 |
| P26982 DEGP_SALTY Protease do              | 12 |                      | SDIALIQINPK                         | 160 | 12 | 4  | 36.17  | b3b6y5y6                                                | 1339.76 | 62.949  | 42449  | 2 | 670.38  | -2.10  |
| P26982 DEGP_SALTY Protease do              | 13 |                      | VMPSVVSINVEGSTTVNTPR                | 48  | 20 | 3  | 21.16  | y10y12y15                                               | 2087.07 | 102.127 | 8757   | 2 | 1044.04 | -3.63  |
| P26982 DEGP_SALTY Protease do              | 14 |                      | GDSSIYLLMQ                          | 465 | 10 | 6  | 41.1   | b7*b7b9y8y9*y9                                          | 1126.57 | 37.178  | 1636   | 2 | 563.79  | 18.31  |
| P26982 DEGP_SALTY Protease do              | 15 |                      | RGELGIMGTELNSELAk                   | 288 | 17 | 10 | 73     | b3b4b5b6b10b12y10*y10*y10y16                            | 1817.92 | 68.082  | 46506  | 3 | 606.65  | -10.74 |
| P26982 DEGP_SALTY Protease do              | 16 |                      | VDAQRGAFVSQVMPNSSAAK                | 308 | 20 | 3  | 14.37  | b7y7y9                                                  | 2063.04 | 93.699  | 2496   | 2 | 1032.03 | 4.73   |
| P26982 DEGP_SALTY Protease do              | 17 |                      | GELGIMGTELNSELAkAMK                 | 289 | 19 | 8  | 48.66  | b6b8b14b17*b17y11*y11y12                                | 1992.03 | 93.044  | 2473   | 3 | 664.68  | 8.58   |
| P26982 DEGP_SALTY Protease do              | 18 | Phosphoryl STY(5)    | GYVVTNNHVVDNASVIK                   | 124 | 17 | 4  | 29.91  | b3b4y6y8                                                | 1908.91 | 38.803  | 55085  | 3 | 636.97  | -2.24  |
| P26982 DEGP_SALTY Protease do              | 19 | Oxidation+M(2)       | VMPSVVSINVEGSTTVNTPR                | 48  | 20 | 12 | 55.47  | b3b4b9*b9y8*y8y10*y10*y10y11*y11y12                     | 2103.08 | 136.339 | 2074   | 2 | 1052.04 | 3.60   |
| P26982 DEGP_SALTY Protease do              | 20 |                      | NLTSQMVEYGQV                        | 275 | 12 | 2  | 7.42   | y9*y9                                                   | 1368.65 | 56.549  | 343230 | 2 | 684.83  | 3.92   |
| P58661 AAT_SALTY Aartate aminotransferase  | 1  |                      | LREEFGVYAVASGR                      | 360 | 14 | 5  | 19.29  | b7y1y4y11y14                                            | 1553.79 | 70.420  | 33927  | 2 | 777.40  | -12.02 |
| P58661 AAT_SALTY Aartate aminotransferase  | 2  |                      | MFENITAAPADPILGLADLFR               | 0   | 21 | 16 | 54.35  | b2b5b6*b6b8*b8*b8b10*b10y1y2y3y5y7y13y21                | 2275.20 | 120.043 | 15675  | 2 | 1138.10 | 8.05   |
| P58661 AAT_SALTY Aartate aminotransferase  | 3  |                      | NYLGIDGIPEFAR                       | 63  | 13 | 7  | 45.53  | b3*b3y4y5y8*y8y10                                       | 1464.75 | 79.890  | 12509  | 2 | 732.88  | 2.33   |
| P58661 AAT_SALTY Aartate aminotransferase  | 4  |                      | TAQTPGGTGALR                        | 96  | 12 | 9  | 50.18  | b2*b2b4b6*b6y8y9y10y12                                  | 1129.59 | 28.596  | 10633  | 2 | 565.30  | -4.97  |
| P58661 AAT_SALTY Aartate aminotransferase  | 5  |                      | INLGIGVYKDETGK                      | 28  | 14 | 6  | 30.74  | b3b11b12*b12y11*y11                                     | 1506.80 | 69.830  | 6695   | 3 | 502.94  | -13.04 |
| P58661 AAT_SALTY Aartate aminotransferase  | 6  | Carbamidomethyl+C(4) | VGACTLVAADAETVDR                    | 254 | 16 | 4  | 17.16  | b3b14y2y4                                               | 1647.81 | 53.644  | 5336   | 2 | 824.41  | 3.56   |
| P58661 AAT_SALTY Aartate aminotransferase  | 7  |                      | ANYSNPPAHGASIVATILSNDALR            | 280 | 24 | 5  | 27.59  | b11b12b15y4y9                                           | 2452.23 | 58.421  | 3387   | 3 | 818.08  | -13.24 |
| P58661 AAT_SALTY Aartate aminotransferase  | 8  |                      | AIWEQELTDMR                         | 304 | 11 | 3  | 24.31  | b7y4y7                                                  | 1391.69 | 41.565  | 2983   | 2 | 696.35  | 18.77  |
| P58661 AAT_SALTY Aartate aminotransferase  | 9  |                      | ELIVASSYSKNFLYNER                   | 236 | 18 | 4  | 15.58  | b9*b9b16y11                                             | 2090.05 | 85.386  | 18783  | 3 | 697.36  | -0.12  |
| P58661 AAT_SALTY Aartate aminotransferase  | 10 |                      | FENITAAPADPILGLADLFRADDRP GK        | 1   | 27 | 7  | 42.66  | b4*b4b5b7b8y6y12                                        | 2883.47 | 62.207  | 7360   | 5 | 577.50  | -11.60 |
| P58661 AAT_SALTY Aartate aminotransferase  | 11 |                      | AIWEQELTDMRQR                       | 304 | 13 | 6  | 32.31  | b8*b8y6y8*y8y9                                          | 1675.81 | 68.207  | 2071   | 2 | 838.41  | -8.45  |
| P58661 AAT_SALTY Aartate aminotransferase  | 12 |                      | LREEFGVYAVASGR                      | 360 | 14 | 3  | 24.73  | b12y6y7                                                 | 1553.79 | 88.311  | 1658   | 2 | 777.40  | -10.92 |

|                                                           |    |  |                               |     |    |    |       |                                         |         |         |       |   |         |        |
|-----------------------------------------------------------|----|--|-------------------------------|-----|----|----|-------|-----------------------------------------|---------|---------|-------|---|---------|--------|
| P58661 AAT_SALTY Aartate aminotransferase                 | 13 |  | RVWVSNPSWPNHK                 | 121 | 13 | 5  | 43.11 | y4y7*y7y8y9                             | 1606.80 | 94.065  | 1652  | 2 | 803.91  | -11.78 |
| P58661 AAT_SALTY Aartate aminotransferase                 | 14 |  | LVAADAETVDR                   | 259 | 11 | 0  | 4.45  |                                         | 1159.60 | 53.642  | 4203  | 2 | 580.30  | 4.00   |
| Q7CQV9 DPS_SALTY DNA protection during starvation protein | 1  |  | TALTDHLDTMAER                 | 70  | 13 | 5  | 32.31 | b9y5y7y8y13                             | 1473.68 | 51.166  | 57450 | 3 | 491.90  | -12.18 |
| Q7CQV9 DPS_SALTY DNA protection during starvation protein | 2  |  | AIGEAKDEDTADIFTAASR           | 134 | 19 | 8  | 53.98 | b12y1y3°y3y4y5y6y13                     | 1980.94 | 57.177  | 26440 | 3 | 660.99  | -3.76  |
| Q7CQV9 DPS_SALTY DNA protection during starvation protein | 3  |  | AVQLGGVALGTTQVINSK            | 83  | 18 | 11 | 67.56 | b2b3*b7b15y2y3y4y11y13y14y15            | 1756.01 | 66.436  | 24607 | 2 | 878.51  | 7.16   |
| Q7CQV9 DPS_SALTY DNA protection during starvation protein | 4  |  | GANFIADVHEMLDGFR              | 55  | 15 | 6  | 29.44 | b10*b10y3y5y6°y9                        | 1676.81 | 81.675  | 22576 | 3 | 559.61  | -8.59  |
| Q7CQV9 DPS_SALTY DNA protection during starvation protein | 5  |  | SYPLDIHNVQDHLKELADR           | 105 | 19 | 3  | 14.94 | b3b10y10                                | 2263.12 | 71.719  | 3474  | 3 | 755.04  | -12.41 |
| Q7CQV9 DPS_SALTY DNA protection during starvation protein | 6  |  | ASNLLYTR                      | 10  | 8  | 4  | 36.1  | b6*b6y4y6                               | 937.50  | 42.993  | 19710 | 2 | 469.25  | -11.13 |
| Q7CQV9 DPS_SALTY DNA protection during starvation protein | 7  |  | SYPLDIHNVQDHLK                | 105 | 14 | 3  | 24.73 | b7b8y4                                  | 1678.84 | 43.671  | 3673  | 2 | 839.92  | -9.02  |
| Q7CQV9 DPS_SALTY DNA protection during starvation protein | 8  |  | SYPLDIHNVQDH                  | 105 | 12 | 0  | 5.66  |                                         | 1437.66 | 71.741  | 13065 | 2 | 719.34  | -9.00  |
| Q7CQV9 DPS_SALTY DNA protection during starvation protein | 9  |  | ADIFTAASR                     | 144 | 9  | 1  | 7.42  | b5                                      | 951.48  | 57.111  | 3304  | 2 | 476.25  | -5.39  |
| P02906 SUBI_SALTY Sulfate-binding protein                 | 1  |  | YLYSPEGQEIAAK                 | 263 | 13 | 8  | 47.29 | b2b3y2y3y9y10y11y13                     | 1468.74 | 49.449  | 47425 | 2 | 734.87  | 2.16   |
| P02906 SUBI_SALTY Sulfate-binding protein                 | 2  |  | NVEVLDSGAR                    | 183 | 10 | 14 | 88.54 | b1b2b3b4*b4y1y2y4y5y6y8y9y10*y10        | 1059.54 | 38.896  | 37082 | 2 | 530.27  | -6.57  |
| P02906 SUBI_SALTY Sulfate-binding protein                 | 3  |  | GSTNTFVER                     | 193 | 9  | 6  | 38.27 | y2y4y5y6*y7y9                           | 1010.48 | 31.186  | 25689 | 2 | 505.75  | -6.40  |
| P02906 SUBI_SALTY Sulfate-binding protein                 | 4  |  | WNYLAAWGYALHHNNNDQAK          | 153 | 20 | 5  | 14.37 | b8y2y8y13y20                            | 2386.08 | 78.214  | 21442 | 4 | 597.28  | -13.61 |
| P02906 SUBI_SALTY Sulfate-binding protein                 | 5  |  | QATSVINGIEADVVTALAYDVD AIAER  | 66  | 28 | 7  | 52.86 | b3b13y6y8y9y10y11                       | 2917.52 | 127.636 | 10244 | 3 | 973.18  | 1.51   |
| P02906 SUBI_SALTY Sulfate-binding protein                 | 6  |  | DIQLLNVSYPTR                  | 20  | 13 | 4  | 28.12 | y2y5y6y9                                | 1533.77 | 81.746  | 7167  | 2 | 767.39  | -13.85 |
| P02906 SUBI_SALTY Sulfate-binding protein                 | 7  |  | FEIVTPSESILAEPTVSVVDK         | 226 | 21 | 6  | 37.04 | b5b8b13b20y5y8                          | 2260.24 | 76.347  | 85792 | 3 | 754.08  | 18.04  |
| P02906 SUBI_SALTY Sulfate-binding protein                 | 8  |  | QIHDWNDLIKPGVSVITPNPK         | 126 | 21 | 4  | 22.33 | b10y4y5°y5                              | 2371.24 | 71.992  | 68803 | 4 | 593.56  | -16.58 |
| P02906 SUBI_SALTY Sulfate-binding protein                 | 9  |  | LFTIDEVFGGWAK                 | 298 | 13 | 6  | 62.73 | b7y4y5y6y7y11                           | 1482.77 | 101.183 | 45888 | 2 | 741.89  | 1.65   |
| P02906 SUBI_SALTY Sulfate-binding protein                 | 10 |  | NFYRPR                        | 276 | 6  | 3  | 26.85 | b4*b4b5                                 | 852.44  | 56.237  | 4380  | 2 | 426.72  | -8.31  |
| P02906 SUBI_SALTY Sulfate-binding protein                 | 11 |  | AQDFVK                        | 173 | 6  | 3  | 26.85 | b5*b5y5                                 | 707.36  | 71.150  | 4174  | 1 | 707.36  | -12.08 |
| P02906 SUBI_SALTY Sulfate-binding protein                 | 12 |  | WGVGFTLLLASTSILAKDIQLLNVSYPTR | 3   | 30 | 9  | 62.18 | b4b5b6°b6b7y5y6°y6y13                   | 3291.76 | 83.500  | 40603 | 3 | 1097.92 | -13.05 |
| P02906 SUBI_SALTY Sulfate-binding protein                 | 13 |  | KYDDAFPK                      | 288 | 8  | 3  | 33.09 | b6y6y7                                  | 983.48  | 72.797  | 1529  | 2 | 492.24  | -8.44  |
| Q8ZP20 TREA_SALTY Periplasmic trehalase                   | 1  |  | WMDNPQQLSTIR                  | 323 | 12 | 4  | 35.5  | y8y9y10y12                              | 1488.73 | 61.333  | 41251 | 2 | 744.87  | 1.23   |
| Q8ZP20 TREA_SALTY Periplasmic trehalase                   | 2  |  | VAAAAQAHLQPGGLATTSVK          | 428 | 21 | 8  | 48.72 | b2b3b4b5y5y10y19y21                     | 2004.11 | 56.606  | 36944 | 3 | 668.71  | -5.24  |
| Q8ZP20 TREA_SALTY Periplasmic trehalase                   | 3  |  | TTTIAPVDLNALLYQLEK            | 335 | 18 | 8  | 32.75 | b5°b5b8y1y2y3y13y14                     | 2003.11 | 103.080 | 35487 | 2 | 1002.06 | 2.68   |
| Q8ZP20 TREA_SALTY Periplasmic trehalase                   | 4  |  | TFADAIPNSDPLMILADYR           | 68  | 19 | 15 | 59.74 | b2°b2b4b6°b6y2y3°y3y4y5°y5y12y13*y13y19 | 2123.07 | 100.762 | 32398 | 2 | 1062.04 | 11.04  |

|                                         |    |                                             |                                |     |    |    |       |                            |         |         |       |   |         |        |
|-----------------------------------------|----|---------------------------------------------|--------------------------------|-----|----|----|-------|----------------------------|---------|---------|-------|---|---------|--------|
| Q8ZP20 TREA_SALTY Periplasmic trehalase | 5  | Carbamidomethyl+C(6); Carbamidomethyl+C(12) | MLDLICPQEKPCDSVPSTRPASLS ATPTK | 534 | 29 | 7  | 25.99 | b2b3b4b10b25y1y3           | 3199.57 | 62.877  | 21511 | 4 | 800.65  | -4.50  |
| Q8ZP20 TREA_SALTY Periplasmic trehalase | 6  |                                             | EYLPQLQKEYAYWMEGVETLQPG QQNQR  | 235 | 28 | 5  | 11.71 | b9y6*y6y11*y11             | 3426.61 | 102.139 | 8018  | 3 | 1142.87 | -9.76  |
| Q8ZP20 TREA_SALTY Periplasmic trehalase | 7  |                                             | WDSLLPLPESYVVPGGR              | 142 | 17 | 8  | 42.59 | b4*b4b9b12*b12y3y9y12      | 1884.99 | 90.726  | 7443  | 2 | 943.00  | 4.34   |
| Q8ZP20 TREA_SALTY Periplasmic trehalase | 8  |                                             | AIEMHLWNNKEGWYADYDLK           | 380 | 20 | 4  | 34.59 | b11b12b13y20               | 2496.18 | 103.387 | 6753  | 2 | 1248.59 | 5.67   |
| Q8ZP20 TREA_SALTY Periplasmic trehalase | 9  |                                             | AIEMHLWNNK                     | 380 | 10 | 5  | 40.13 | b5y4y6y7y10                | 1255.64 | 78.296  | 1527  | 2 | 628.32  | 9.43   |
| Q8ZP20 TREA_SALTY Periplasmic trehalase | 10 |                                             | EHIDGLWPVLTR                   | 123 | 12 | 3  | 22.28 | b3b6y5                     | 1435.74 | 55.504  | 18283 | 3 | 479.25  | -21.26 |
| Q8ZP20 TREA_SALTY Periplasmic trehalase | 11 |                                             | SNPNRPATEIYR                   | 296 | 12 | 7  | 36.17 | b8*b8b11*b11*b11y8y9       | 1417.74 | 49.602  | 12233 | 2 | 709.38  | 17.22  |
| Q8ZP20 TREA_SALTY Periplasmic trehalase | 12 |                                             | LEDGSVLNR                      | 266 | 9  | 5  | 30.49 | b4*b4b8y7*y7               | 1002.54 | 24.407  | 7241  | 2 | 501.77  | 15.95  |
| Q8ZP20 TREA_SALTY Periplasmic trehalase | 13 |                                             | TYYLSR                         | 206 | 6  | 2  | 26.85 | y4y5                       | 802.41  | 36.617  | 4368  | 2 | 401.71  | 3.80   |
| Q8ZP20 TREA_SALTY Periplasmic trehalase | 14 |                                             | DTPRPESWVEDIATAK               | 280 | 16 | 5  | 28.34 | b12y9*y9y10y13             | 1814.88 | 111.576 | 2744  | 2 | 907.94  | -6.66  |
| Q8ZP20 TREA_SALTY Periplasmic trehalase | 15 |                                             | NVEKWDSLLPLPESYVVPGGR          | 138 | 21 | 4  | 21.7  | b9y4y8y10                  | 2355.25 | 87.306  | 30246 | 3 | 785.75  | 5.49   |
| Q8ZP20 TREA_SALTY Periplasmic trehalase | 16 |                                             | DTPRPESWVEDIATAKSNPNRPAT EIYR  | 280 | 28 | 3  | 17.72 | b6b9b14                    | 3213.61 | 120.694 | 21438 | 3 | 1071.88 | 5.77   |
| Q8ZP20 TREA_SALTY Periplasmic trehalase | 17 |                                             | DLRSAASGWDFSSR                 | 308 | 15 | 3  | 26.22 | y3y5y12                    | 1625.76 | 40.868  | 6088  | 3 | 542.59  | -6.01  |
| Q8ZP20 TREA_SALTY Periplasmic trehalase | 18 |                                             | WDSLLPLPESYVVPGGRFR            | 142 | 19 | 3  | 22.72 | b9b10y7                    | 2188.16 | 62.273  | 5634  | 3 | 730.06  | 4.02   |
| Q8ZP20 TREA_SALTY Periplasmic trehalase | 19 |                                             | YWDDRDTPRPESWVEDIATAK          | 275 | 21 | 3  | 20.52 | y3y8y18                    | 2550.18 | 76.397  | 3833  | 4 | 638.30  | -3.54  |
| Q8ZP20 TREA_SALTY Periplasmic trehalase | 20 | Oxidation+M(9)                              | SQPPFFAFMVELLAQHEGDDALK        | 212 | 23 | 3  | 13.05 | b8b10y5                    | 2606.27 | 136.131 | 9728  | 3 | 869.43  | 5.06   |
| Q8ZP20 TREA_SALTY Periplasmic trehalase | 21 |                                             | TFADAIPNSDPLMILADYR            | 68  | 19 | 0  | 5.66  |                            | 2105.02 | 100.759 | 2901  | 3 | 702.35  | -3.83  |
| Q7CR64 YAEH_SALTY UPF0325 protein yaeH  | 1  | Carbamidomethyl+C(10)                       | YVIDELDQICQR                   | 77  | 12 | 11 | 86.92 | b2b9y1y3y6y8*y8y9y10y11y12 | 1551.76 | 67.138  | 33634 | 2 | 776.38  | 8.65   |
| Q7CR64 YAEH_SALTY UPF0325 protein yaeH  | 2  | Carbamidomethyl+C(10)                       | YVIDELDQICQRDR                 | 77  | 14 | 4  | 19.29 | b5b10y11y14                | 1822.86 | 54.219  | 13030 | 2 | 911.93  | -7.50  |
| Q7CR64 YAEH_SALTY UPF0325 protein yaeH  | 3  |                                             | SLGITNPPEIDR                   | 6   | 12 | 4  | 32.49 | y4y6y8*y10                 | 1343.70 | 80.788  | 8629  | 2 | 672.35  | 14.17  |
| Q7CR64 YAEH_SALTY UPF0325 protein yaeH  | 4  |                                             | YDNLK                          | 1   | 5  | 4  | 26.44 | b3*b3b4*b4                 | 652.34  | 25.960  | 8638  | 1 | 652.34  | 9.73   |
| Q7CR64 YAEH_SALTY UPF0325 protein yaeH  | 5  |                                             | IYFQK                          | 31  | 5  | 2  | 13.22 | b4*b4                      | 698.38  | 37.222  | 2458  | 1 | 698.38  | -5.86  |
| Q7CR64 YAEH_SALTY UPF0325 protein yaeH  | 6  |                                             | SELDLK                         | 91  | 6  | 1  | 13.62 | b5                         | 704.38  | 27.323  | 1541  | 1 | 704.38  | -7.97  |
| Q7CR64 YAEH_SALTY UPF0325 protein yaeH  | 7  |                                             | HLESVVANKISEIEADLDK            | 105 | 19 | 4  | 25.87 | b8y4y9y10                  | 2110.09 | 83.938  | 36630 | 3 | 704.03  | -7.64  |
| Q7CR64 YAEH_SALTY UPF0325 protein yaeH  | 8  |                                             | SLGITNPPEIDRYSLR               | 6   | 16 | 5  | 34.77 | b3b10b12y6y14              | 1862.95 | 64.336  | 17604 | 3 | 621.65  | -7.40  |
| Q7CR64 YAEH_SALTY UPF0325 protein yaeH  | 9  |                                             | ISEIEADLDKLTR                  | 114 | 13 | 3  | 20.64 | b4b7y8                     | 1502.81 | 42.030  | 4079  | 3 | 501.61  | 1.22   |
| Q7CR64 YAEH_SALTY UPF0325 protein yaeH  | 10 |                                             | YDNLKSLGITNPPEIDR              | 1   | 17 | 5  | 26.15 | b7y7y10y12*y12             | 1977.01 | 109.601 | 3184  | 3 | 659.67  | 6.48   |
| Q7CR64 YAEH_SALTY UPF0325 protein yaeH  | 11 |                                             | TVVADGIGQGYKEVQEISPNLR         | 55  | 22 | 5  | 26.92 | b8b9y5*y5y12               | 2373.23 | 103.833 | 2438  | 2 | 1187.12 | -5.14  |
| Q7CR64 YAEH_SALTY UPF0325 protein yaeH  | 12 |                                             | MYDNLKSLGITNPPEIDR             | 0   | 18 | 5  | 32.57 | y5*y5y9y10y12              | 2108.05 | 106.652 | 2389  | 2 | 1054.53 | 8.69   |

|                                                    |    |                                       |                                  |     |    |    |        |                                             |         |         |        |   |         |        |
|----------------------------------------------------|----|---------------------------------------|----------------------------------|-----|----|----|--------|---------------------------------------------|---------|---------|--------|---|---------|--------|
| [P53636]SODC1_SALTY Superoxide dismutase [Cu-Zn] 1 | 1  | Carbamidomethyl+C(3)                  | FACGVIEK                         | 169 | 8  | 9  | 54.09  | b2y1y2°y2y3y5y6y7y8                         | 923.46  | 39.837  | 138135 | 2 | 462.23  | -10.18 |
| [P53636]SODC1_SALTY Superoxide dismutase [Cu-Zn] 1 | 2  |                                       | GGDNYSDKPAPLGGGGAR               | 151 | 18 | 16 | 117.71 | b2b5*b5b10*b10y3y5y6y7y8y10y11y12y13°y13y18 | 1688.78 | 32.196  | 95407  | 3 | 563.60  | -12.94 |
| [P53636]SODC1_SALTY Superoxide dismutase [Cu-Zn] 1 | 3  |                                       | EVPALMAGGHLDPEK                  | 84  | 15 | 13 | 92.53  | b2b3°b3b7°b7b10y3y5y7y8y9y13y15             | 1563.80 | 56.168  | 34678  | 2 | 782.40  | 11.08  |
| [P53636]SODC1_SALTY Superoxide dismutase [Cu-Zn] 1 | 4  |                                       | GHLGDLPLGVVNADGTATYPLLA PR       | 110 | 25 | 4  | 22.89  | b3b4b15y2                                   | 2517.32 | 84.003  | 3329   | 4 | 630.08  | -11.25 |
| [P53636]SODC1_SALTY Superoxide dismutase [Cu-Zn] 1 | 5  |                                       | SLSELK                           | 137 | 6  | 1  | 13.62  | y4                                          | 676.39  | 30.537  | 2090   | 1 | 676.39  | -1.62  |
| [P53636]SODC1_SALTY Superoxide dismutase [Cu-Zn] 1 | 6  |                                       | EVPALMAGGHLDPEKTGK               | 84  | 18 | 6  | 46.41  | b7y6y8y10y11y16                             | 1849.92 | 51.744  | 24927  | 3 | 617.31  | -12.41 |
| [P53636]SODC1_SALTY Superoxide dismutase [Cu-Zn] 1 | 7  |                                       | GHSLMIHKGGDNYSDKPAPLGGG GAR      | 143 | 26 | 3  | 22.81  | b10b11b13                                   | 2592.28 | 75.055  | 18313  | 4 | 648.83  | 2.17   |
| [P53636]SODC1_SALTY Superoxide dismutase [Cu-Zn] 1 | 8  | Oxidation+M(6)                        | EVPALMAGGHLDPEK                  | 84  | 15 | 4  | 18.14  | b6°b6b10y9                                  | 1579.76 | 64.263  | 17745  | 3 | 527.26  | -11.28 |
| [P53636]SODC1_SALTY Superoxide dismutase [Cu-Zn] 1 | 9  | Carbamidomethyl+C(3)                  | FACGVIE                          | 169 | 7  | 0  | 1.21   |                                             | 795.38  | 39.816  | 13820  | 2 | 398.19  | 7.52   |
| [P53636]SODC1_SALTY Superoxide dismutase [Cu-Zn] 1 | 10 |                                       | PALMAGGHLDPEK                    | 86  | 13 | 3  | 26.22  | b3b7b11                                     | 1335.68 | 56.180  | 9210   | 2 | 668.34  | 5.76   |
| [P53636]SODC1_SALTY Superoxide dismutase [Cu-Zn] 1 | 11 |                                       | EVPALMAGGHLDPEK                  | 84  | 15 | 0  | 4.04   |                                             | 1545.75 | 56.166  | 6284   | 3 | 515.92  | -9.24  |
| [P53636]SODC1_SALTY Superoxide dismutase [Cu-Zn] 1 | 12 | Carbamidomethyl+C(3)                  | FACGVIEK                         | 169 | 8  | 0  | 1.21   |                                             | 905.46  | 39.789  | 2230   | 2 | 453.23  | 12.07  |
| [P55900]SERC_SALTY Phohoserine aminotransferase    | 1  | Carbamidomethyl+C(7)                  | LAQQELCDWHGLGTSVMEISHR           | 20  | 22 | 9  | 49.29  | b3*b3b10y1y3y4y7y11y12                      | 2567.17 | 73.083  | 46149  | 4 | 642.55  | -14.84 |
| [P55900]SERC_SALTY Phohoserine aminotransferase    | 2  |                                       | ASIYNAMPIEGVK                    | 335 | 13 | 5  | 20.64  | b1b3b10y10y13                               | 1392.71 | 58.004  | 40056  | 3 | 464.91  | -6.66  |
| [P55900]SERC_SALTY Phohoserine aminotransferase    | 3  |                                       | AQVFNFSSGPAMLPAEVLK              | 1   | 19 | 11 | 57.96  | b2b3y1y3y6y12y13y15*y15y16y19               | 2006.05 | 90.683  | 34114  | 2 | 1003.53 | 5.90   |
| [P55900]SERC_SALTY Phohoserine aminotransferase    | 4  |                                       | YGVIIYAGAQK                      | 188 | 10 | 9  | 70.55  | b1b2b3b7y4y5y6y9y10                         | 1069.57 | 42.085  | 29044  | 2 | 535.29  | -0.91  |
| [P55900]SERC_SALTY Phohoserine aminotransferase    | 5  |                                       | ALTD FMIDFERR                    | 348 | 12 | 4  | 37.26  | b4b6b11y5                                   | 1513.73 | 93.885  | 3204   | 3 | 505.25  | -8.23  |
| [P55900]SERC_SALTY Phohoserine aminotransferase    | 6  |                                       | AQGGVAAMHK                       | 257 | 10 | 3  | 26.91  | b5y5y8                                      | 969.49  | 18.165  | 2998   | 2 | 485.25  | -3.90  |
| [P55900]SERC_SALTY Phohoserine aminotransferase    | 7  |                                       | VFLEESFAAGLHALK                  | 311 | 15 | 4  | 26.22  | b2b10b11b13                                 | 1631.89 | 87.586  | 2473   | 3 | 544.63  | 3.96   |
| [P55900]SERC_SALTY Phohoserine aminotransferase    | 8  |                                       | MAQVFNFSSGPAMLPAEVLK             | 0   | 20 | 4  | 23.79  | b6b7b9*b9                                   | 2137.09 | 102.668 | 1728   | 3 | 713.04  | 4.68   |
| [P55900]SERC_SALTY Phohoserine aminotransferase    | 9  | Carbamidomethyl+C(3)                  | KYCAPQIIDAK                      | 111 | 11 | 4  | 31.29  | b7b8*b8b10                                  | 1306.68 | 65.828  | 74037  | 2 | 653.84  | -4.76  |
| [P55900]SERC_SALTY Phohoserine aminotransferase    | 10 |                                       | TTADYVDAGYWAASAIKEAK             | 91  | 20 | 5  | 22.62  | b4b6b8y3°y3                                 | 2131.03 | 100.546 | 39792  | 3 | 711.02  | -0.34  |
| [P55900]SERC_SALTY Phohoserine aminotransferase    | 11 |                                       | MNVPFQLADNTLDKVFLEESFAA GLHALK   | 297 | 29 | 3  | 11.53  | b3b7y26                                     | 3218.64 | 108.341 | 24571  | 4 | 805.41  | -5.84  |
| [P55900]SERC_SALTY Phohoserine aminotransferase    | 12 |                                       | AELLYGVIDNSDFYRNDVQAQNR          | 272 | 23 | 6  | 29.47  | b14y6y10y14y19*y19                          | 2643.29 | 78.344  | 23451  | 3 | 881.77  | 2.59   |
| [P55900]SERC_SALTY Phohoserine aminotransferase    | 13 |                                       | GQFAGVPLNLLGDKTTADYVDA GYWAASAIK | 77  | 31 | 6  | 18.78  | b3b16*b16b25y3y25                           | 3212.64 | 96.435  | 22000  | 3 | 1071.55 | 4.64   |
| [P55900]SERC_SALTY Phohoserine aminotransferase    | 14 |                                       | ALTD FMIDFERR                    | 348 | 12 | 4  | 35.5   | b7b8b9°b9                                   | 1513.76 | 70.489  | 3081   | 3 | 505.26  | 8.23   |
| [P55900]SERC_SALTY Phohoserine aminotransferase    | 15 | Carbamidomethyl+C(7); Oxidation+M(17) | LAQQELCDWHGLGTSVMEISHR           | 20  | 22 | 3  | 13.44  | b3b7y6                                      | 2583.19 | 90.860  | 7791   | 4 | 646.55  | -6.33  |
| [P55900]SERC_SALTY Phohoserine aminotransferase    | 16 | Oxidation+M(1)                        | MNVPFQLADNTLDK                   | 297 | 14 | 4  | 30.74  | b3y8y10y11                                  | 1621.77 | 67.621  | 2624   | 4 | 406.20  | -9.48  |

|                                                |    |                      |                                        |     |    |    |        |                                                   |         |         |       |   |         |        |
|------------------------------------------------|----|----------------------|----------------------------------------|-----|----|----|--------|---------------------------------------------------|---------|---------|-------|---|---------|--------|
| P55900 SERC_SALTY Phohoserine aminotransferase | 17 |                      | QVFNFSGGPAMLP AEVLK                    | 2   | 18 | 2  | 7.42   | b13°b13                                           | 1934.99 | 90.625  | 1612  | 2 | 968.00  | -5.30  |
| Q7CPE1 ATPA_SALTY ATP synthase subunit alpha   | 1  |                      | IGSF EAALLAYVDRDHAPLMQEIN QSGGYNDEIEGK | 463 | 36 | 15 | 73.44  | b5°b5b6°b6b7b8b12b22b23y2y3y5y7y11y36             | 3950.88 | 94.596  | 92118 | 4 | 988.48  | -1.73  |
| Q7CPE1 ATPA_SALTY ATP synthase subunit alpha   | 2  | Carbamidomethyl+C(7) | IHGLADCMQGEMISLPGNR                    | 40  | 19 | 15 | 62.44  | b2b3b9b12y3*y3y5*y5y6y10°y10y11°y11*y11y19        | 2098.98 | 68.135  | 55215 | 3 | 700.33  | -1.98  |
| Q7CPE1 ATPA_SALTY ATP synthase subunit alpha   | 3  |                      | MQLNSTEISELIK                          | 0   | 13 | 6  | 28.12  | b2y3y10°y10y11y13                                 | 1505.79 | 75.867  | 54546 | 2 | 753.40  | -0.41  |
| Q7CPE1 ATPA_SALTY ATP synthase subunit alpha   | 4  |                      | DSVGAVVMGPYADLAEGMK                    | 68  | 19 | 11 | 62.44  | b5b8b13y1y2y3y4y7y11y12°y12                       | 1909.92 | 82.697  | 51342 | 2 | 955.47  | 11.25  |
| Q7CPE1 ATPA_SALTY ATP synthase subunit alpha   | 5  |                      | ILEVPVGR                               | 93  | 8  | 4  | 40.87  | y4y5y6y8                                          | 882.53  | 51.291  | 34589 | 2 | 441.77  | -8.85  |
| Q7CPE1 ATPA_SALTY ATP synthase subunit alpha   | 6  | Carbamidomethyl+C(1) | CIYVAIGQK                              | 192 | 9  | 5  | 30.49  | b3b4y1y5y9                                        | 1051.56 | 56.233  | 33134 | 2 | 526.28  | -4.06  |
| Q7CPE1 ATPA_SALTY ATP synthase subunit alpha   | 7  |                      | GYLADVELAK                             | 453 | 10 | 10 | 68.79  | b2b3b7b8y1y2y6y7y8y10                             | 1078.57 | 59.304  | 31062 | 2 | 539.79  | -4.30  |
| Q7CPE1 ATPA_SALTY ATP synthase subunit alpha   | 8  |                      | ELAAFSQFASDLDDATR                      | 401 | 17 | 11 | 73     | b4°b4b10y3y4y5°y5y6y9y13y17                       | 1856.88 | 87.688  | 30552 | 2 | 928.94  | 8.41   |
| Q7CPE1 ATPA_SALTY ATP synthase subunit alpha   | 9  |                      | QYAPMSVAQQLVFAAER                      | 434 | 19 | 10 | 51.81  | b3*b3b9b11b14y1y4y5y16y19                         | 2109.09 | 92.427  | 28445 | 2 | 1055.05 | 6.60   |
| Q7CPE1 ATPA_SALTY ATP synthase subunit alpha   | 10 |                      | ELAAFSQFASDLDDATRK                     | 401 | 18 | 4  | 15.58  | b2b8y9y11                                         | 1984.95 | 82.429  | 27036 | 3 | 662.32  | -5.47  |
| Q7CPE1 ATPA_SALTY ATP synthase subunit alpha   | 11 |                      | QSVDQPVTGYK                            | 139 | 12 | 7  | 61.15  | b12y4y7y8y9y10y12                                 | 1349.67 | 33.032  | 23644 | 2 | 675.34  | 0.27   |
| Q7CPE1 ATPA_SALTY ATP synthase subunit alpha   | 12 |                      | VNADYVEAFTK                            | 303 | 11 | 10 | 84.97  | b1b2b8b9y4y5°y5y7y8y9                             | 1256.61 | 59.340  | 16126 | 2 | 628.81  | -7.38  |
| Q7CPE1 ATPA_SALTY ATP synthase subunit alpha   | 13 |                      | EAFPGDV FYLHSR                         | 283 | 13 | 4  | 20.64  | b3b11y8y13                                        | 1537.75 | 75.644  | 9245  | 3 | 513.25  | 3.33   |
| Q7CPE1 ATPA_SALTY ATP synthase subunit alpha   | 14 |                      | IAQFN VVSEAHNEG TIVSVSDGVI R           | 15  | 25 | 6  | 27     | b10*b10b19y5y6y22                                 | 2641.35 | 73.446  | 31879 | 3 | 881.12  | -3.60  |
| Q7CPE1 ATPA_SALTY ATP synthase subunit alpha   | 15 |                      | YAIALNLER                              | 59  | 9  | 3  | 38.27  | y4y5y6                                            | 1062.59 | 63.550  | 20378 | 2 | 531.80  | -6.32  |
| Q7CPE1 ATPA_SALTY ATP synthase subunit alpha   | 16 |                      | GEDALIYDDL SK                          | 252 | 13 | 5  | 46.11  | b8b10b11y6y7                                      | 1451.70 | 55.509  | 16037 | 3 | 484.57  | -17.91 |
| Q7CPE1 ATPA_SALTY ATP synthase subunit alpha   | 17 |                      | DHAPLMQEINQSGGYNDEIEGK                 | 477 | 22 | 6  | 20.87  | b12y3°y3y6°y6y10                                  | 2445.12 | 92.921  | 7641  | 4 | 612.04  | 8.29   |
| Q7CPE1 ATPA_SALTY ATP synthase subunit alpha   | 18 |                      | TALAQYR                                | 394 | 7  | 3  | 37.46  | b4y3y4                                            | 822.44  | 19.179  | 6344  | 2 | 411.72  | -9.20  |
| Q7CPE1 ATPA_SALTY ATP synthase subunit alpha   | 19 |                      | VNADYVEAFTKGEVK                        | 303 | 15 | 3  | 18.14  | b4b14y14                                          | 1669.86 | 100.703 | 68143 | 2 | 835.43  | 11.18  |
| Q7CPE1 ATPA_SALTY ATP synthase subunit alpha   | 20 |                      | VVNTLGAPIDGKGPVDNDGFSAV EAIAPGVIDR     | 106 | 33 | 18 | 101.39 | b4°b4b7°b7°b7b26y6°y6y7y8y9y10y11y13y15y17y26°y26 | 3263.72 | 83.449  | 59541 | 3 | 1088.58 | 9.80   |
| Q7CPE1 ATPA_SALTY ATP synthase subunit alpha   | 21 |                      | IGSF EAALLAYVDRDHAPLMQEIN QSGGYNDEIEGK | 463 | 36 | 7  | 25.54  | b4b13°b13y5y6y11y15                               | 3950.86 | 83.474  | 40264 | 3 | 1317.63 | -6.18  |
| Q7CPE1 ATPA_SALTY ATP synthase subunit alpha   | 22 |                      | DHAPLMQEINQSGGYNDEIEGKL K              | 477 | 24 | 4  | 19.02  | b3b6°b6b13                                        | 2686.31 | 92.358  | 26547 | 3 | 896.11  | 10.18  |
| Q7CPE1 ATPA_SALTY ATP synthase subunit alpha   | 23 |                      | EAFPGDV FYLHSRLLER                     | 283 | 17 | 3  | 24.97  | b11b13b14                                         | 2049.09 | 82.027  | 23767 | 3 | 683.70  | 14.77  |
| Q7CPE1 ATPA_SALTY ATP synthase subunit alpha   | 24 |                      | QKQYAPMSVAQQLVFAAER                    | 432 | 21 | 5  | 35.2   | b5b9b11y4y5                                       | 2365.24 | 93.127  | 2309  | 3 | 789.09  | 4.85   |
| Q7CPE1 ATPA_SALTY ATP synthase subunit alpha   | 25 | Phosphoryl STY(5)    | ASTISNVVRK                             | 201 | 10 | 4  | 33.9   | b3b4b9°b9                                         | 1154.58 | 40.808  | 9840  | 2 | 577.79  | -7.19  |
| Q7CPE1 ATPA_SALTY ATP synthase subunit alpha   | 26 | Oxidation+M(18)      | DSVGAVVMGPYADLAEGMK                    | 68  | 19 | 4  | 20.7   | b3b12y6y9                                         | 1925.91 | 89.063  | 1582  | 4 | 482.23  | 5.01   |
| Q7CPE1 ATPA_SALTY ATP synthase subunit alpha   | 27 |                      | ELAAFSQFASDLDDATR K                    | 401 | 18 | 0  | 5.26   |                                                   | 1967.95 | 82.428  | 1810  | 3 | 656.65  | 8.13   |

|                                                    |    |                       |                                           |     |    |    |        |                                                   |         |         |        |   |         |        |
|----------------------------------------------------|----|-----------------------|-------------------------------------------|-----|----|----|--------|---------------------------------------------------|---------|---------|--------|---|---------|--------|
| Q8ZQT5 TOLB_SALTY Protein tolB                     | 1  |                       | SNNTEPTWFPDSQTLAFTSDQAG<br>RPQVYK         | 287 | 29 | 14 | 74.38  | b4b5°b5b12y2y11°y11y13y<br>14y20y21y24y25y29      | 3285.56 | 76.715  | 104586 | 3 | 1095.86 | 4.01   |
| Q8ZQT5 TOLB_SALTY Protein tolB                     | 2  |                       | IEITQGVD SARPIGVV PFK                     | 24  | 19 | 12 | 65.48  | b2°b2b3b9y2y3y12y14y15<br>y16y18y19               | 2026.11 | 69.506  | 71617  | 3 | 676.04  | -11.45 |
| Q8ZQT5 TOLB_SALTY Protein tolB                     | 3  |                       | LPATDGQVK                                 | 413 | 9  | 4  | 54.5   | y4y6y7y8                                          | 928.52  | 26.878  | 59760  | 2 | 464.76  | 7.43   |
| Q8ZQT5 TOLB_SALTY Protein tolB                     | 4  |                       | WAGPGAAPEDIGGIVAADLR                      | 43  | 20 | 14 | 80.12  | b1b4b6b7b13b17y1y2y3y5<br>y6y13y14y20             | 1936.00 | 84.675  | 51194  | 2 | 968.50  | 4.60   |
| Q8ZQT5 TOLB_SALTY Protein tolB                     | 5  |                       | SPQPLMSPA WSPDGSK                         | 197 | 16 | 18 | 116.65 | b2°b2b3b6°b6b8°b8b12y1<br>y4y5y6y9°y9y10y13y14y16 | 1684.82 | 61.539  | 50193  | 2 | 842.91  | 11.81  |
| Q8ZQT5 TOLB_SALTY Protein tolB                     | 6  |                       | SALVIQTLANGAVR                            | 223 | 14 | 5  | 24.73  | b3b4y2y9y14                                       | 1412.83 | 69.839  | 28729  | 2 | 706.92  | 3.28   |
| Q8ZQT5 TOLB_SALTY Protein tolB                     | 7  |                       | IAYVVQTNGGQFPYELR                         | 166 | 17 | 9  | 53.47  | y2y3y5y8°y8y11°y11y13°y<br>13                     | 1955.02 | 72.319  | 28021  | 2 | 978.01  | 7.37   |
| Q8ZQT5 TOLB_SALTY Protein tolB                     | 8  |                       | QVASFPR                                   | 237 | 7  | 4  | 37.46  | b5y4y5y7                                          | 804.43  | 37.202  | 17064  | 2 | 402.72  | -11.68 |
| Q8ZQT5 TOLB_SALTY Protein tolB                     | 9  |                       | TGSLNLYVMDLASGQIR                         | 264 | 17 | 5  | 16.32  | b9b11y2y11°y11                                    | 1837.95 | 88.696  | 12996  | 2 | 919.48  | -0.40  |
| Q8ZQT5 TOLB_SALTY Protein tolB                     | 10 |                       | FNPLDR                                    | 67  | 6  | 1  | 13.62  | y4                                                | 761.39  | 44.270  | 6088   | 2 | 381.20  | -1.12  |
| Q8ZQT5 TOLB_SALTY Protein tolB                     | 11 |                       | HNGAPAFSPDGTK                             | 244 | 13 | 4  | 28.12  | y5°y5y7y8                                         | 1298.61 | 56.090  | 3603   | 2 | 649.81  | 1.13   |
| Q8ZQT5 TOLB_SALTY Protein tolB                     | 12 |                       | LPATDGQVKSPA WSPYL                        | 413 | 17 | 3  | 24.97  | b5b14b15                                          | 1829.92 | 91.076  | 5683   | 2 | 915.46  | -13.94 |
| Q8ZQT5 TOLB_SALTY Protein tolB                     | 13 |                       | VIQTLANGAVR                               | 226 | 11 | 0  | 3.64   |                                                   | 1141.66 | 69.848  | 19157  | 2 | 571.33  | -8.55  |
| Q8ZQT5 TOLB_SALTY Protein tolB                     | 14 |                       | WAGPGAAPEDIGGIVAAD                        | 43  | 18 | 3  | 21.16  | y7y11y15                                          | 1666.80 | 84.728  | 3287   | 3 | 556.27  | -4.98  |
| Q8ZQT5 TOLB_SALTY Protein tolB                     | 15 |                       | TGSLNLYVMDLASGQIR                         | 264 | 17 | 0  | 4.85   |                                                   | 1819.95 | 88.718  | 9745   | 2 | 910.48  | 11.40  |
| P0A2M5 UPP_SALTY Uracil<br>phohoribosyltransferase | 1  |                       | AGLGMMEGVLENVPSAR                         | 78  | 17 | 8  | 43.84  | b5b12b13y2y4y7y12y17                              | 1730.87 | 80.934  | 46290  | 2 | 865.94  | 5.78   |
| P0A2M5 UPP_SALTY Uracil<br>phohoribosyltransferase | 2  |                       | VLVLVAAPEGIAALEK                          | 155 | 16 | 11 | 100.51 | b2b3b4b5b6b7y8y9y11y12<br>y16                     | 1592.97 | 85.250  | 30647  | 2 | 796.99  | 2.76   |
| P0A2M5 UPP_SALTY Uracil<br>phohoribosyltransferase | 3  |                       | NEETLEPVVPYFQK                            | 103 | 13 | 5  | 32.31  | b2b3y5y7y8                                        | 1593.79 | 64.401  | 20745  | 2 | 797.40  | 4.90   |
| P0A2M5 UPP_SALTY Uracil<br>phohoribosyltransferase | 4  |                       | ITVVPILR                                  | 70  | 8  | 4  | 40.87  | b2y4y5y6                                          | 910.60  | 68.838  | 11661  | 2 | 455.81  | -4.69  |
| P0A2M5 UPP_SALTY Uracil<br>phohoribosyltransferase | 5  |                       | LVSNIDER                                  | 116 | 8  | 5  | 36.1   | b5y2°y2y3y6                                       | 945.51  | 57.713  | 9839   | 2 | 473.26  | 10.07  |
| P0A2M5 UPP_SALTY Uracil<br>phohoribosyltransferase | 6  |                       | ELASEVGSLLTYEATADLETEK                    | 29  | 22 | 6  | 20.87  | b5°b5b8b11y4y22                                   | 2369.19 | 108.512 | 3740   | 2 | 1185.10 | 12.78  |
| P0A2M5 UPP_SALTY Uracil<br>phohoribosyltransferase | 7  |                       | AHPDVELYTASIDQGLNEHGYYIP<br>GLGDAGDKIFGTK | 171 | 37 | 4  | 21.37  | b5y10y11y35                                       | 3911.95 | 88.188  | 40419  | 4 | 978.74  | 2.43   |
| P0A2M5 UPP_SALTY Uracil<br>phohoribosyltransferase | 8  |                       | AGLGMMEGVLENVPSARISVVG<br>MYR             | 78  | 25 | 4  | 12.41  | b5b12y7°y7                                        | 2636.35 | 84.003  | 13228  | 3 | 879.45  | 3.98   |
| Q9L4T0 LUXS_SALTY S-<br>ribosylhomocysteine lyase  | 1  |                       | TGFYMSLIGTPDEQR                           | 84  | 15 | 4  | 18.14  | b3y3y7y15                                         | 1714.82 | 77.633  | 32530  | 2 | 857.92  | 7.40   |
| Q9L4T0 LUXS_SALTY S-<br>ribosylhomocysteine lyase  | 2  | Carbamidomethyl+C(15) | VQDQNQIPELN VYQCGTYQM HSL<br>SEAQDIAR     | 113 | 31 | 11 | 47.71  | b2b7b10y4y8°y8y9y10y12<br>y24y31                  | 3635.72 | 74.171  | 22912  | 3 | 1212.58 | 10.34  |
| Q9L4T0 LUXS_SALTY S-<br>ribosylhomocysteine lyase  | 3  | Carbamidomethyl+C(2)  | FCIPNKEVMPEK                              | 39  | 12 | 5  | 22.28  | b4y4°y4y8°y8                                      | 1491.73 | 37.843  | 3014   | 3 | 497.91  | -2.45  |
| Q9L4T0 LUXS_SALTY S-<br>ribosylhomocysteine lyase  | 4  |                       | PLLD SFAVDHTR                             | 1   | 12 | 3  | 22.28  | b6y4y8                                            | 1370.72 | 70.477  | 1522   | 2 | 685.87  | 12.02  |
| Q9L4T0 LUXS_SALTY S-<br>ribosylhomocysteine lyase  | 5  |                       | VADAWKAAMADV LK                           | 99  | 14 | 4  | 27.86  | b3b10°b10b13                                      | 1488.79 | 89.698  | 314781 | 2 | 744.90  | -0.98  |



|                                                |    |                       |                            |     |    |    |        |                                          |         |         |       |   |         |        |
|------------------------------------------------|----|-----------------------|----------------------------|-----|----|----|--------|------------------------------------------|---------|---------|-------|---|---------|--------|
| [Q9L4T0]LUXS_SALTY S-ribosylhomocysteine lyase | 6  | Carbamidomethyl+C(2)  | FCIPNKEVMPEK               | 39  | 12 | 3  | 26.26  | b8b9y4                                   | 1491.72 | 51.156  | 35518 | 3 | 497.91  | -10.64 |
| [Q9L4T0]LUXS_SALTY S-ribosylhomocysteine lyase | 7  | Carbamidomethyl+C(2)  | FCIPNKEVM                  | 39  | 10 | 0  | 2.83   |                                          | 1234.58 | 37.826  | 2577  | 3 | 412.20  | -14.53 |
| [Q56073]DNAK_SALTY Chaperone protein dnaK      | 1  |                       | IINEPTAAALAYGLDKEVGNR      | 167 | 21 | 15 | 115.45 | b2b4*y1y3y5y6y9y10*y10y11y12y14y17y19y21 | 2215.16 | 74.042  | 56199 | 3 | 739.06  | -3.86  |
| [Q56073]DNAK_SALTY Chaperone protein dnaK      | 2  |                       | QAVTNPQNTLFAIKR            | 56  | 15 | 4  | 26.22  | b15y3y4y6                                | 1700.92 | 57.594  | 27923 | 3 | 567.65  | -11.91 |
| [Q56073]DNAK_SALTY Chaperone protein dnaK      | 3  |                       | MQELAQVSQK                 | 587 | 10 | 7  | 55.57  | b2b3b8y6y7y8y10                          | 1161.59 | 36.070  | 25411 | 2 | 581.30  | -1.68  |
| [Q56073]DNAK_SALTY Chaperone protein dnaK      | 4  |                       | ASSGLNEEEIQK               | 502 | 12 | 12 | 100.14 | b11y4y5y6*y6*y6y7y8y9y10*y10y12          | 1304.63 | 33.575  | 21809 | 2 | 652.82  | -2.71  |
| [Q56073]DNAK_SALTY Chaperone protein dnaK      | 5  |                       | NDPLAMQR                   | 253 | 8  | 5  | 49.32  | b5y4y5y6y8                               | 944.46  | 38.200  | 14369 | 2 | 472.73  | -5.04  |
| [Q56073]DNAK_SALTY Chaperone protein dnaK      | 6  |                       | TFEVLATNGDTHLGGEDFDTR      | 214 | 21 | 13 | 57.49  | b1b7*b7b8*b8b12*b12b13y4*y4y10y11y21     | 2295.04 | 64.287  | 12392 | 4 | 574.52  | -6.17  |
| [Q56073]DNAK_SALTY Chaperone protein dnaK      | 7  |                       | QAVTNPQNTLFAIK             | 56  | 14 | 7  | 39.83  | b3b7*b7b10y3y11y14                       | 1544.85 | 66.330  | 10934 | 2 | 772.93  | 5.53   |
| [Q56073]DNAK_SALTY Chaperone protein dnaK      | 8  |                       | FQDEEVQR                   | 76  | 8  | 5  | 51.08  | b3b7y4*y4y5                              | 1050.48 | 27.401  | 10837 | 2 | 525.74  | -3.14  |
| [Q56073]DNAK_SALTY Chaperone protein dnaK      | 9  |                       | DVSIMPYK                   | 84  | 8  | 7  | 40.87  | b2b8y3y6*y6y7y8                          | 952.48  | 54.128  | 10336 | 2 | 476.74  | -5.06  |
| [Q56073]DNAK_SALTY Chaperone protein dnaK      | 10 |                       | VLENAEGDR                  | 25  | 9  | 8  | 30.49  | b2b5*b5b9y2y7y8y9                        | 1002.49 | 21.950  | 6101  | 2 | 501.75  | 2.56   |
| [Q56073]DNAK_SALTY Chaperone protein dnaK      | 11 |                       | DVNPDEAVAIGAAVQGGLTGDVK    | 363 | 24 | 4  | 26.16  | b13b14y4y7                               | 2295.17 | 101.383 | 2141  | 3 | 765.73  | -4.79  |
| [Q56073]DNAK_SALTY Chaperone protein dnaK      | 12 |                       | LINYLVEFK                  | 235 | 10 | 4  | 40.13  | b8y5y7y8                                 | 1253.70 | 40.304  | 29188 | 2 | 627.35  | 18.79  |
| [Q56073]DNAK_SALTY Chaperone protein dnaK      | 13 |                       | TAEDYLGEPVTEAVITVPAYFNDAQR | 125 | 26 | 3  | 12.14  | b11y9y11                                 | 2869.39 | 92.783  | 23100 | 3 | 957.14  | 1.45   |
| [Q56073]DNAK_SALTY Chaperone protein dnaK      | 14 |                       | LESLVEDLVNR                | 304 | 11 | 5  | 47.74  | b6b7b9y6y10                              | 1286.71 | 76.731  | 14891 | 2 | 643.86  | 8.54   |
| [Q56073]DNAK_SALTY Chaperone protein dnaK      | 15 |                       | LPADDK                     | 556 | 6  | 1  | 13.62  | y4                                       | 658.33  | 45.135  | 12233 | 1 | 658.33  | -12.33 |
| [Q56073]DNAK_SALTY Chaperone protein dnaK      | 16 |                       | MPMVQK                     | 345 | 6  | 1  | 13.62  | y5                                       | 733.37  | 30.495  | 9991  | 1 | 733.37  | -5.08  |
| [Q56073]DNAK_SALTY Chaperone protein dnaK      | 17 |                       | GMPQIEVTFDIDADGILHVS       | 467 | 22 | 4  | 23.31  | b4b5*b5b12                               | 2356.14 | 93.963  | 3629  | 4 | 589.79  | -17.41 |
| [Q56073]DNAK_SALTY Chaperone protein dnaK      | 18 |                       | IELSSAQQTVDNLPYITADATGPK   | 270 | 24 | 3  | 22     | b5b6y9                                   | 2532.29 | 73.269  | 3392  | 3 | 844.77  | 1.35   |
| [Q56073]DNAK_SALTY Chaperone protein dnaK      | 19 | Carbamidomethyl+C(12) | IIGIDLGTNSCVAIMDGTQAR      | 3   | 22 | 5  | 19.95  | y4*y4y6*y6y13                            | 2306.20 | 78.397  | 2989  | 2 | 1153.60 | 20.43  |
| [Q56073]DNAK_SALTY Chaperone protein dnaK      | 20 |                       | IINEPTAAALAYGLDK           | 167 | 16 | 4  | 27.67  | b6y5y8y11                                | 1659.89 | 32.496  | 2848  | 2 | 830.45  | -1.69  |
| [Q56073]DNAK_SALTY Chaperone protein dnaK      | 21 |                       | IIGADNGDAWLDVK             | 92  | 14 | 4  | 19.29  | b7b11*b11y12                             | 1486.77 | 67.468  | 2154  | 2 | 743.89  | 10.59  |
| [Q56073]DNAK_SALTY Chaperone protein dnaK      | 22 |                       | VAEFFGK                    | 352 | 7  | 4  | 40.47  | b4*b4b6y5                                | 797.41  | 50.418  | 1948  | 2 | 399.21  | -14.16 |
| [Q56073]DNAK_SALTY Chaperone protein dnaK      | 23 |                       | TIAVYDLGGGTFDISIIEIDVDGEK  | 188 | 26 | 3  | 12.14  | b14b16y6                                 | 2769.41 | 85.394  | 1894  | 3 | 923.81  | 15.43  |
| [Q56073]DNAK_SALTY Chaperone protein dnaK      | 24 |                       | NQGDHLLHSTR                | 536 | 11 | 3  | 31.29  | y4y8y9                                   | 1277.62 | 40.899  | 1870  | 2 | 639.31  | -13.28 |
| [Q56073]DNAK_SALTY Chaperone protein dnaK      | 25 |                       | AKIELSSAQQTVDNLPYITADATGPK | 268 | 26 | 4  | 12.14  | b13*b13y8y15                             | 2731.40 | 97.996  | 19192 | 3 | 911.14  | -7.15  |
| [Q56073]DNAK_SALTY Chaperone protein dnaK      | 26 |                       | NDPLAMQRLK                 | 253 | 10 | 4  | 26.91  | b3*b3b5y3                                | 1185.65 | 38.823  | 13187 | 2 | 593.33  | 9.68   |
| [Q56073]DNAK_SALTY Chaperone protein dnaK      | 27 |                       | KTAEDYLGEPVTEAVITVPAYFND   | 124 | 27 | 4  | 25.33  | b3b7y8y9                                 | 2997.52 | 88.248  | 9189  | 3 | 999.84  | 11.65  |

|                                            |    |                   |                                            |     |    |    |        |                                                                                   |         |         |        |   |         |        |
|--------------------------------------------|----|-------------------|--------------------------------------------|-----|----|----|--------|-----------------------------------------------------------------------------------|---------|---------|--------|---|---------|--------|
| Q56073 DNAK_SALTY Chaperone protein dnaK   | 28 |                   | SLGQFNLDGINPAPRGMPIQEVTF<br>DIDADGILHVS AK | 452 | 37 | 8  | 23.59  | b6°b6b9°b9b12b13y13°y1<br>3                                                       | 3935.99 | 112.225 | 3785   | 4 | 984.75  | -0.74  |
| Q56073 DNAK_SALTY Chaperone protein dnaK   | 29 |                   | VLENAEGDRTTPSI IAYTQDGETL<br>VGQPAK        | 25  | 30 | 6  | 16.53  | b6°b6°b6b9b11y13                                                                  | 3173.60 | 69.570  | 3669   | 3 | 1058.54 | 2.38   |
| Q56073 DNAK_SALTY Chaperone protein dnaK   | 30 |                   | QATKDAGR                                   | 151 | 8  | 4  | 36.1   | b7°b7y4y6                                                                         | 846.45  | 25.882  | 2763   | 2 | 423.73  | 9.30   |
| Q56073 DNAK_SALTY Chaperone protein dnaK   | 31 | Phosphoryl STY(9) | IELSSAQQT D VNL PYITADATGPK                | 270 | 24 | 7  | 23.43  | b7°b7b8°b8°b8b12_HPO3<br>b12y23                                                   | 2612.22 | 49.587  | 21803  | 3 | 871.41  | -7.01  |
| Q56073 DNAK_SALTY Chaperone protein dnaK   | 32 |                   | TFEVLATNG                                  | 214 | 9  | 1  | 7.65   | y8                                                                                | 951.47  | 64.343  | 1719   | 2 | 476.24  | -13.28 |
| Q56073 DNAK_SALTY Chaperone protein dnaK   | 33 |                   | VLENAEGDR                                  | 25  | 9  | 0  | 1.62   |                                                                                   | 984.46  | 21.953  | 28207  | 2 | 492.73  | -11.59 |
| P0AA07 PTHP_SALTY Phohocarrier protein HPr | 1  |                   | MFQQEVTTAPNGLHTRPAAQFV<br>K                | 0   | 24 | 15 | 111.32 | b2b3b5b6b8y3y11y12y14y<br>15y16y17y19y20y24                                       | 2684.37 | 62.394  | 445318 | 4 | 671.85  | -9.55  |
| P0AA07 PTHP_SALTY Phohocarrier protein HPr | 2  |                   | GFTSEITVTSNGK                              | 27  | 13 | 10 | 56.54  | b2b4b7b10y2y5y7°y7y10°<br>y10                                                     | 1340.67 | 50.368  | 8954   | 2 | 670.84  | -0.18  |
| P0AA07 PTHP_SALTY Phohocarrier protein HPr | 3  |                   | LM AELE                                    | 79  | 6  | 7  | 66.51  | b3b4b5°b5y3°y3y4                                                                  | 705.34  | 52.945  | 230723 | 1 | 705.34  | -5.71  |
| P0AA07 PTHP_SALTY Phohocarrier protein HPr | 4  |                   | LQTLGLTQGT VVTISAEGEDEQKA<br>VEHLVK        | 49  | 30 | 24 | 179.61 | b3°b3°b3b4°b4b6°b6°b6y3<br>y11y13°y13y14y15y16y17y<br>18y19y20y22y23y24y26y2<br>8 | 3193.67 | 80.572  | 390026 | 4 | 799.17  | -7.87  |
| P0AA07 PTHP_SALTY Phohocarrier protein HPr | 5  |                   | EAKGFTSEITVTSNGK                           | 24  | 16 | 3  | 25.53  | b3b11b12                                                                          | 1668.85 | 66.541  | 18008  | 2 | 834.93  | 2.56   |
| P0AA07 PTHP_SALTY Phohocarrier protein HPr | 6  |                   | GFTSEITVTSNGKSASAK                         | 27  | 18 | 4  | 15.58  | b7°b7b9y11                                                                        | 1784.89 | 43.729  | 1665   | 3 | 595.63  | -9.57  |
| P0A9Y9 CC_SALTY Cold shock-like protein cC | 1  |                   | GFGFITPADGSK                               | 15  | 12 | 18 | 135.24 | b2b3b4b6y2°y2y3°y3y4y5y<br>6°y6y7°y7y8y9y10y12                                    | 1196.59 | 63.158  | 425148 | 2 | 598.80  | -2.24  |
| P0A9Y9 CC_SALTY Cold shock-like protein cC | 2  |                   | GPAAVNVTAI                                 | 59  | 10 | 6  | 26.91  | b2b3b6°b6y5y10                                                                    | 912.51  | 68.127  | 6504   | 1 | 912.51  | -9.10  |
| P0A9Y9 CC_SALTY Cold shock-like protein cC | 3  |                   | DVVFHFSAIQNGGFK                            | 27  | 15 | 7  | 37.1   | b2b3b7b11y7y12y15                                                                 | 1665.86 | 60.886  | 4648   | 2 | 833.43  | 12.02  |
| P0A9Y9 CC_SALTY Cold shock-like protein cC | 4  |                   | TLAEGQNVEFEIQDGQK                          | 42  | 17 | 3  | 23.31  | b4y8y9                                                                            | 1905.95 | 65.093  | 1515   | 2 | 953.48  | 16.84  |
| P0A9Y9 CC_SALTY Cold shock-like protein cC | 5  |                   | TLAEGQNVEFEIQDGQKGPAAVN<br>VTAI            | 42  | 27 | 6  | 17.78  | b5°b5b8°b8b13y20                                                                  | 2799.44 | 99.343  | 13105  | 2 | 1400.22 | 8.29   |
| P0A9Y9 CC_SALTY Cold shock-like protein cC | 6  |                   | WFNESKGFGFITPADGSK                         | 9   | 18 | 4  | 22.74  | b3b7b9°b9                                                                         | 1987.93 | 71.746  | 10570  | 2 | 994.47  | -10.38 |
| P0A9Y9 CC_SALTY Cold shock-like protein cC | 7  |                   | GQVKWFNESK                                 | 5   | 10 | 6  | 39.34  | b6b9y5°y5y7°y7                                                                    | 1222.63 | 79.128  | 2615   | 3 | 408.21  | 3.69   |
| P0A2B3 RS7_SALTY 30S ribosomal protein S7  | 1  |                   | FGSELLAK                                   | 17  | 8  | 10 | 51.08  | b1b2b5°b5b6°b6y2y3y7y8                                                            | 864.47  | 50.302  | 54117  | 2 | 432.74  | -11.51 |
| P0A2B3 RS7_SALTY 30S ribosomal protein S7  | 2  |                   | STAESIVYSALETLAQR                          | 36  | 17 | 5  | 33.72  | b8b10b11b13y17                                                                    | 1838.96 | 108.792 | 46575  | 2 | 919.98  | 6.51   |
| P0A2B3 RS7_SALTY 30S ribosomal protein S7  | 3  |                   | FVNILMVDGK                                 | 25  | 10 | 6  | 41.1   | b2b3b4y3y5y10                                                                     | 1135.61 | 74.658  | 21809  | 2 | 568.31  | -7.31  |
| P0A2B3 RS7_SALTY 30S ribosomal protein S7  | 4  |                   | LANELSDAADNK                               | 119 | 12 | 4  | 32.49  | b4°b4b6b10                                                                        | 1260.61 | 36.432  | 5262   | 2 | 630.81  | 3.10   |
| P0A2B3 RS7_SALTY 30S ribosomal protein S7  | 5  |                   | WIVEAAR                                    | 102 | 7  | 4  | 40.47  | y4°y4y5y6                                                                         | 844.46  | 49.075  | 31532  | 2 | 422.73  | -12.21 |
| P0A2B3 RS7_SALTY 30S ribosomal protein S7  | 6  |                   | NALAMR                                     | 96  | 6  | 1  | 13.62  | y5                                                                                | 675.36  | 34.870  | 7410   | 1 | 675.36  | -5.24  |
| P0A2B3 RS7_SALTY 30S ribosomal protein S7  | 7  |                   | ILPDPK                                     | 11  | 6  | 2  | 26.85  | y4y5                                                                              | 682.41  | 31.299  | 4142   | 1 | 682.41  | -4.56  |
| P0A2B3 RS7_SALTY 30S ribosomal protein S7  | 8  |                   | VGGSTYQVPVEVRPVR                           | 79  | 16 | 4  | 24.86  | b4b10b12°b12                                                                      | 1742.93 | 52.849  | 1599   | 3 | 581.65  | -11.70 |

|                                                       |    |                                         |                                |     |    |    |        |                                                      |         |         |        |   |         |        |
|-------------------------------------------------------|----|-----------------------------------------|--------------------------------|-----|----|----|--------|------------------------------------------------------|---------|---------|--------|---|---------|--------|
| P0A2B3 RS7_SALTY 30S ribosomal protein S7             | 9  |                                         | EDVHRMAEANK                    | 138 | 11 | 4  | 24.31  | b4b10°b10y8                                          | 1299.60 | 28.596  | 125167 | 2 | 650.31  | -6.11  |
| P0A2B3 RS7_SALTY 30S ribosomal protein S7             | 10 |                                         | LANELSDAADNKGTAVK              | 119 | 17 | 17 | 121.7  | b3b4°b4*b4b7b10y5y7y8*y8y9*y9y12*y12y13y15y16        | 1716.86 | 37.889  | 82829  | 3 | 572.96  | -10.81 |
| P0A2B3 RS7_SALTY 30S ribosomal protein S7             | 11 |                                         | SGKSELEAFEVALENVRPTVEVK        | 53  | 23 | 4  | 19.46  | b6°b6b9b12                                           | 2531.32 | 87.229  | 12300  | 3 | 844.44  | -6.17  |
| P63411 ACKA_SALTY Acetate kinase                      | 1  |                                         | EGTRPAVVPTNEELVIAQDASR         | 374 | 23 | 14 | 115.75 | b7b8b9b12y3y4y5*y5y6y7y8y10y14y23                    | 2465.31 | 68.029  | 40975  | 3 | 822.44  | 2.77   |
| P63411 ACKA_SALTY Acetate kinase                      | 2  | Carbamidomethyl+C(19)                   | FAIIDAVNGDEYLSGLAECFHLPEAR     | 17  | 26 | 18 | 117.28 | b2b3b4b15y4y5y10°y10y11y12°y12y13y14°y14y18y19y22y26 | 2907.41 | 103.880 | 40433  | 3 | 969.81  | 3.11   |
| P63411 ACKA_SALTY Acetate kinase                      | 3  |                                         | LGVLGFEVDHER                   | 348 | 12 | 3  | 22.28  | b3b9y3                                               | 1370.69 | 66.576  | 38007  | 3 | 457.57  | -12.74 |
| P63411 ACKA_SALTY Acetate kinase                      | 4  | Carbamidomethyl+C(7)                    | LVLVLNCGSSSLK                  | 4   | 13 | 5  | 39.3   | b3y7y8y9y13                                          | 1389.78 | 65.972  | 24847  | 2 | 695.39  | -1.41  |
| P63411 ACKA_SALTY Acetate kinase                      | 5  |                                         | YIGSYTALMDGR                   | 312 | 12 | 4  | 22.28  | b6b9b12y5                                            | 1346.65 | 60.398  | 18922  | 2 | 673.83  | 3.72   |
| P63411 ACKA_SALTY Acetate kinase                      | 6  |                                         | NVAVFDTAFHQTMPEESYLYALPYSLYK   | 144 | 28 | 9  | 49.16  | b2b11b12b13°b13y1y6y7y17                             | 3297.61 | 98.038  | 12847  | 3 | 1099.87 | 8.51   |
| P63411 ACKA_SALTY Acetate kinase                      | 7  |                                         | YGAHGTSHFYVTQEAAK              | 178 | 17 | 4  | 34.51  | b2y5y6y7                                             | 1866.87 | 48.961  | 4473   | 3 | 622.96  | -3.40  |
| P63411 ACKA_SALTY Acetate kinase                      | 8  | Carbamidomethyl+C(18)                   | MLTKESGLLGLTEVTSDCR            | 268 | 19 | 3  | 21.9   | b3b5b15                                              | 2110.04 | 103.655 | 2659   | 3 | 704.02  | -6.60  |
| P63411 ACKA_SALTY Acetate kinase                      | 9  |                                         | LDVAVFTGGIGENAAMVR             | 324 | 18 | 3  | 15.58  | b4b9y11                                              | 1819.92 | 87.831  | 2229   | 2 | 910.46  | -9.66  |
| P63411 ACKA_SALTY Acetate kinase                      | 10 | Carbamidomethyl+C(14)                   | ESGLLGLTEVTSDCR                | 272 | 15 | 4  | 34.67  | y8y9y10°y10                                          | 1636.79 | 70.890  | 33299  | 2 | 818.90  | 5.67   |
| P63411 ACKA_SALTY Acetate kinase                      | 11 |                                         | YIGSYTALMDGRLDAVVFTGGIGENAAMVR | 312 | 30 | 5  | 19.32  | b3b6b9y9y12                                          | 3147.57 | 77.607  | 3780   | 5 | 630.32  | 3.57   |
| P63411 ACKA_SALTY Acetate kinase                      | 12 | Carbamidomethyl+C(18);Phosphoryl STY(6) | MLTKESGLLGLTEVTSDCR            | 268 | 19 | 5  | 20.7   | b9b12°b12y12y14                                      | 2190.03 | 66.713  | 3212   | 3 | 730.68  | 11.37  |
| P15111 DHE4_SALTY NADP-ecific glutamate dehydrogenase | 1  |                                         | AANAGGVATSGLEMAQNAAR           | 370 | 20 | 15 | 85.33  | b1b8b9b15y1y4y8y9y11y13°y13*y13y14y17y20             | 1859.91 | 58.933  | 26738  | 2 | 930.46  | 4.59   |
| P15111 DHE4_SALTY NADP-ecific glutamate dehydrogenase | 2  |                                         | DPHQTEFAQAVR                   | 17  | 12 | 6  | 22.28  | b2b4*b4b8y2y3                                        | 1398.67 | 38.327  | 8580   | 3 | 466.90  | -3.75  |
| P15111 DHE4_SALTY NADP-ecific glutamate dehydrogenase | 3  |                                         | VVTASDSSGTVVDESGFTPEK          | 257 | 21 | 13 | 79.38  | b5b6b7b9°b9b10b12y2y3y7y9y10y21                      | 2112.02 | 51.035  | 8165   | 2 | 1056.51 | 11.21  |
| P15111 DHE4_SALTY NADP-ecific glutamate dehydrogenase | 4  |                                         | EVMTTLWPFLQNP                  | 29  | 15 | 5  | 44.7   | b3b5b11b13y12                                        | 1860.94 | 79.931  | 4526   | 2 | 930.97  | 3.48   |
| P15111 DHE4_SALTY NADP-ecific glutamate dehydrogenase | 5  |                                         | HGLGFEGMR                      | 225 | 9  | 3  | 38.27  | y5y6y8                                               | 1003.49 | 68.140  | 25834  | 2 | 502.25  | 7.79   |
| P15111 DHE4_SALTY NADP-ecific glutamate dehydrogenase | 6  |                                         | HLGPDTDVPAGDIGVGGR             | 156 | 18 | 3  | 22.74  | b5b7b10                                              | 1732.88 | 81.916  | 7952   | 2 | 866.94  | 9.30   |
| P15111 DHE4_SALTY NADP-ecific glutamate dehydrogenase | 7  |                                         | EVGFMA GMMR                    | 174 | 10 | 3  | 26.91  | b5b7y9                                               | 1128.50 | 45.544  | 6159   | 2 | 564.76  | 3.89   |
| P15111 DHE4_SALTY NADP-ecific glutamate dehydrogenase | 8  |                                         | VADAMLAQGV                     | 436 | 11 | 5  | 31.29  | b3b4b8°b8*b8                                         | 1087.56 | 89.006  | 3794   | 2 | 544.29  | -17.40 |
| P15111 DHE4_SALTY NADP-ecific glutamate dehydrogenase | 9  | Oxidation+M(14)                         | AANAGGVATSGLEMAQNAAR           | 370 | 20 | 4  | 22.62  | b16y3y11y17                                          | 1875.88 | 85.269  | 13605  | 3 | 625.97  | -8.59  |
| P15111 DHE4_SALTY NADP-ecific glutamate dehydrogenase | 10 | Oxidation+M(23)                         | HLGPDTDVPAGDIGVGREVGFMA GMMR   | 156 | 28 | 4  | 14.91  | b6b11y5y11                                           | 2858.36 | 102.566 | 1738   | 4 | 715.35  | 7.00   |
| P15111 DHE4_SALTY NADP-ecific glutamate dehydrogenase | 11 |                                         | VVTASDSSGTVVDESGFTP            | 257 | 19 | 2  | 12.7   | y3y9                                                 | 1854.85 | 51.021  | 1704   | 2 | 927.93  | -3.69  |
| Q7CPE2 ATPB_SALTY ATP synthase subunit beta           | 1  |                                         | GIMEGEYDHLPEQAFYMVGSIDEAVEK    | 429 | 27 | 9  | 34.12  | b2y6°y6y9y11°y11y12y15y27                            | 3057.41 | 99.260  | 64573  | 3 | 1019.81 | 6.55   |

|                                                              |    |                       |                                |     |    |    |        |                                    |         |         |       |   |         |        |
|--------------------------------------------------------------|----|-----------------------|--------------------------------|-----|----|----|--------|------------------------------------|---------|---------|-------|---|---------|--------|
| Q7CPE2 ATPB_SALTY ATP synthase subunit beta                  | 2  |                       | QLDPLVVGQEHYDTAR               | 343 | 16 | 11 | 102.22 | b2b13y3y4y5y8y9y10°y10y11y12       | 1840.90 | 56.657  | 56487 | 3 | 614.31  | -7.82  |
| Q7CPE2 ATPB_SALTY ATP synthase subunit beta                  | 3  |                       | YTLAGTEVSALLGR                 | 247 | 14 | 7  | 24.73  | b2°b2b3°b3y10y11y14                | 1450.79 | 79.081  | 51298 | 2 | 725.90  | -0.34  |
| Q7CPE2 ATPB_SALTY ATP synthase subunit beta                  | 4  | Carbamidomethyl+C(6)  | VIDLMCPFAK                     | 132 | 10 | 6  | 58.12  | b6b10y4y6y7y8                      | 1193.60 | 79.743  | 44638 | 2 | 597.31  | -0.72  |
| Q7CPE2 ATPB_SALTY ATP synthase subunit beta                  | 5  |                       | VALTGLTMAEK                    | 219 | 11 | 3  | 36.07  | y7y8y9                             | 1133.62 | 58.077  | 44088 | 2 | 567.31  | -2.80  |
| Q7CPE2 ATPB_SALTY ATP synthase subunit beta                  | 6  |                       | FLSQPFFVAEVFTGSPGK             | 399 | 18 | 4  | 22.74  | y3y6y14y18                         | 1958.02 | 98.985  | 41678 | 2 | 979.52  | 9.35   |
| Q7CPE2 ATPB_SALTY ATP synthase subunit beta                  | 7  |                       | MPSAVGYQPTLAEEMGVLQER          | 261 | 21 | 14 | 88.54  | b3b4b6b9y3°y3y6y7*y7y9y10y11y13y21 | 2306.13 | 80.670  | 38660 | 2 | 1153.57 | 6.14   |
| Q7CPE2 ATPB_SALTY ATP synthase subunit beta                  | 8  |                       | TVNMMELIR                      | 156 | 9  | 8  | 53.25  | b2°b2b3y2y3y5y8y9                  | 1106.57 | 74.927  | 38547 | 2 | 553.79  | -3.75  |
| Q7CPE2 ATPB_SALTY ATP synthase subunit beta                  | 9  |                       | AAPSYEELSNSQELLETGIK           | 112 | 20 | 10 | 46.68  | b8b20y1y2y4y5y12y13y15y20          | 2179.09 | 72.731  | 38297 | 2 | 1090.05 | 7.62   |
| Q7CPE2 ATPB_SALTY ATP synthase subunit beta                  | 10 |                       | VGLFGGAGVGK                    | 145 | 11 | 7  | 27.32  | b2b3y1y2y7y8y11                    | 961.54  | 57.835  | 34299 | 2 | 481.27  | -6.86  |
| Q7CPE2 ATPB_SALTY ATP synthase subunit beta                  | 11 |                       | QIASLGIYPAVDPLDSTSR            | 324 | 19 | 8  | 75.95  | y4y11y12y13y14y15y17y19            | 2003.06 | 79.626  | 34233 | 2 | 1002.04 | 9.69   |
| Q7CPE2 ATPB_SALTY ATP synthase subunit beta                  | 12 |                       | DLEHPIEVPVGK                   | 70  | 12 | 5  | 29.48  | b4°b4b8b9y2                        | 1332.70 | 54.401  | 10098 | 2 | 666.86  | -8.70  |
| Q7CPE2 ATPB_SALTY ATP synthase subunit beta                  | 13 |                       | NIAIEHSGYSVFAGVGER             | 165 | 18 | 5  | 15.58  | b9*b9y11°y11y13                    | 1905.95 | 66.739  | 3270  | 2 | 953.48  | 3.59   |
| Q7CPE2 ATPB_SALTY ATP synthase subunit beta                  | 14 |                       | IMNVLGEPVDMK                   | 87  | 12 | 3  | 22.28  | b3y3y6                             | 1345.69 | 65.090  | 1765  | 2 | 673.35  | 5.62   |
| Q7CPE2 ATPB_SALTY ATP synthase subunit beta                  | 15 | Carbamidomethyl+C(26) | AAPSYEELSNSQELLETGIKVIDLMCPFAK | 112 | 30 | 4  | 24.78  | b5b6y4y9                           | 3353.68 | 120.160 | 8454  | 3 | 1118.56 | 3.86   |
| Q7CPE2 ATPB_SALTY ATP synthase subunit beta                  | 16 | Phosphoryl STY(8)     | QIASLGIYPAVDPLDSTSR            | 324 | 19 | 4  | 41.14  | y3y4y10y11                         | 2082.98 | 69.670  | 8049  | 2 | 1041.99 | -9.02  |
| Q7CPE2 ATPB_SALTY ATP synthase subunit beta                  | 17 | Oxidation+M(4)        | TIAMGSSDGLR                    | 53  | 11 | 3  | 31.29  | y6y7y10                            | 1123.54 | 45.022  | 5419  | 2 | 562.27  | 0.00   |
| Q7CPE2 ATPB_SALTY ATP synthase subunit beta                  | 18 |                       | HSGYSVFAGVGER                  | 170 | 13 | 0  | 5.26   |                                    | 1365.66 | 66.703  | 5637  | 2 | 683.33  | 5.18   |
| Q7CPE2 ATPB_SALTY ATP synthase subunit beta                  | 19 |                       | IAIEHSGYSVFAGVGER              | 166 | 17 | 1  | 7.34   | b8                                 | 1791.89 | 66.786  | 2462  | 3 | 597.97  | -5.18  |
| Q7CPE2 ATPB_SALTY ATP synthase subunit beta                  | 20 |                       | QLDPLVVGQEHYDTAR               | 343 | 16 | 0  | 4.45   |                                    | 1822.91 | 56.672  | 2608  | 3 | 608.31  | 1.54   |
| P0A1A5 ILVE_SALTY Branched-chain-amino-acid aminotransferase | 1  |                       | AAPNTIPTAAK                    | 149 | 11 | 9  | 90.2   | b2b7y3y4y5y7y8y9y11                | 1054.58 | 31.137  | 22057 | 2 | 527.80  | -4.51  |
| P0A1A5 ILVE_SALTY Branched-chain-amino-acid aminotransferase | 2  |                       | AGGNYLSLLVGSEAR                | 160 | 16 | 5  | 30.8   | b12b15y4y5y16                      | 1593.80 | 78.200  | 18850 | 2 | 797.40  | -13.63 |
| P0A1A5 ILVE_SALTY Branched-chain-amino-acid aminotransferase | 3  |                       | EQVLSRESLYLADEVFMSGTAAEI TPVR  | 238 | 28 | 4  | 11.71  | b3b13*b13y13                       | 3111.57 | 93.944  | 9312  | 3 | 1037.86 | 0.71   |
| P0A1A5 ILVE_SALTY Branched-chain-amino-acid aminotransferase | 4  |                       | ESLYLADEVFMSGTAAEITPVR         | 244 | 22 | 7  | 13.44  | b3°b3b10°b10y13°y13y22             | 2399.15 | 117.613 | 2462  | 4 | 600.54  | -11.09 |
| P0A1A5 ILVE_SALTY Branched-chain-amino-acid aminotransferase | 5  |                       | SVDGIQVGEGR                    | 266 | 11 | 7  | 35.31  | b3b9*b9y6*y6y8°y8                  | 1116.56 | 40.202  | 21441 | 2 | 558.79  | 0.33   |
| P0A1A5 ILVE_SALTY Branched-chain-amino-acid aminotransferase | 6  |                       | EQVLSR                         | 238 | 6  | 1  | 13.62  | b5                                 | 731.40  | 31.709  | 15211 | 1 | 731.40  | -7.09  |
| P0A1A5 ILVE_SALTY Branched-chain-amino-acid aminotransferase | 7  |                       | IQQAFFGLFTGETEDK               | 284 | 16 | 8  | 45.28  | b3b6b15°b15y4°y4y7y10              | 1830.92 | 89.133  | 2164  | 3 | 610.98  | 15.60  |
| P0A1A5 ILVE_SALTY Branched-chain-amino-acid aminotransferase | 8  | Carbamidomethyl+C(12) | SVDGIQVGEGRCGPVTK              | 266 | 17 | 4  | 39.16  | b9b12b13b14                        | 1758.89 | 59.398  | 1729  | 2 | 879.95  | 5.41   |
| P0A1A5 ILVE_SALTY Branched-chain-amino-acid aminotransferase | 9  | Phosphoryl STY()      | DGVLFTPPFTSSALPGITR            | 204 | 19 | 5  | 29.42  | b4b7b9y4y10                        | 2056.02 | 108.322 | 2236  | 2 | 1028.52 | 9.38   |
| P0A1A5 ILVE_SALTY Branched-chain-amino-acid aminotransferase | 10 | Oxidation+M(11)       | ESLYLADEVFMSGTAAEITPVR         | 244 | 22 | 6  | 43.64  | b5b6b8b11°b11b12                   | 2415.18 | 61.515  | 3123  | 5 | 483.84  | 0.40   |

|                                                                           |    |                       |                                      |     |    |    |        |                                              |         |         |        |   |         |        |
|---------------------------------------------------------------------------|----|-----------------------|--------------------------------------|-----|----|----|--------|----------------------------------------------|---------|---------|--------|---|---------|--------|
| [P65889]PUR7_SALTY Phohoribosylaminoimidazole-succinocarboxamide synthase | 1  |                       | LAEAGIPTQMER                         | 60  | 12 | 9  | 100.14 | b3y3y5y6y8y9y10y11y12                        | 1315.66 | 48.727  | 42617  | 2 | 658.33  | -3.80  |
| [P65889]PUR7_SALTY Phohoribosylaminoimidazole-succinocarboxamide synthase | 2  |                       | QSLGGLIEAYEAVHR                      | 215 | 16 | 9  | 53.14  | b3y1y2y3y5y6y7y13y16                         | 1713.87 | 84.080  | 37728  | 3 | 571.96  | -13.60 |
| [P65889]PUR7_SALTY Phohoribosylaminoimidazole-succinocarboxamide synthase | 3  |                       | TVYSTENPDLLVLEFR                     | 13  | 16 | 16 | 88.75  | b1b2b4b6b11b12b13°b13y2y3y4y12°y12y13*y13y16 | 1895.99 | 87.691  | 37670  | 2 | 948.50  | 8.11   |
| [P65889]PUR7_SALTY Phohoribosylaminoimidazole-succinocarboxamide synthase | 4  |                       | IEQFDR                               | 39  | 6  | 1  | 13.62  | b4                                           | 807.41  | 42.190  | 4624   | 2 | 404.21  | 10.51  |
| [P65889]PUR7_SALTY Phohoribosylaminoimidazole-succinocarboxamide synthase | 5  |                       | FNHFIMTK                             | 52  | 8  | 4  | 36.1   | b3b7*b7y7                                    | 1037.51 | 110.765 | 2014   | 1 | 1037.51 | -14.24 |
| [P65889]PUR7_SALTY Phohoribosylaminoimidazole-succinocarboxamide synthase | 6  |                       | QAELYR                               | 3   | 6  | 1  | 13.62  | b5                                           | 779.40  | 27.928  | 1771   | 2 | 390.21  | 0.00   |
| [P65889]PUR7_SALTY Phohoribosylaminoimidazole-succinocarboxamide synthase | 7  |                       | ELTYK                                | 152 | 5  | 2  | 26.44  | y3y4                                         | 653.34  | 42.313  | 1649   | 1 | 653.34  | -10.93 |
| [P65889]PUR7_SALTY Phohoribosylaminoimidazole-succinocarboxamide synthase | 8  |                       | ETLDKMDK                             | 203 | 8  | 4  | 33.09  | b4°b4y5y6                                    | 979.46  | 54.166  | 17689  | 2 | 490.24  | -12.84 |
| [P65889]PUR7_SALTY Phohoribosylaminoimidazole-succinocarboxamide synthase | 9  |                       | TVYSTENPDLLVLEFRNDTSAGD GAR          | 13  | 26 | 7  | 39.02  | b10b11°b11b12°b12y3y8                        | 2840.38 | 79.788  | 7322   | 3 | 947.46  | 3.09   |
| [P65889]PUR7_SALTY Phohoribosylaminoimidazole-succinocarboxamide synthase | 10 |                       | NDTSAGDGARIEQFDR                     | 29  | 16 | 6  | 28.34  | b14y5y10°y10*y10y11                          | 1751.80 | 84.035  | 2675   | 4 | 438.71  | 3.62   |
| [P65889]PUR7_SALTY Phohoribosylaminoimidazole-succinocarboxamide synthase | 11 |                       | GMVNNKFNFHFIMTK                      | 46  | 14 | 3  | 27.07  | b7b10b11                                     | 1680.82 | 58.659  | 1810   | 2 | 840.91  | -11.18 |
| [P65889]PUR7_SALTY Phohoribosylaminoimidazole-succinocarboxamide synthase | 12 | Phosphoryl STY(10)    | QSLGGLIEAYEAVHR                      | 215 | 16 | 5  | 17.16  | b4*b4b8y7°y7                                 | 1793.83 | 28.682  | 4500   | 4 | 449.21  | -10.62 |
| [P66764]METK_SALTY S-adenosylmethionine synthetase                        | 1  |                       | SLQEAVMEEIIPILPSEWLNSTSK             | 197 | 25 | 12 | 59.42  | b5°b5b6b11*b11b12y7y9°y9y10y13y25            | 2856.52 | 110.826 | 51622  | 3 | 952.84  | 4.87   |
| [P66764]METK_SALTY S-adenosylmethionine synthetase                        | 2  | Carbamidomethyl+C(10) | FVIGGPMGDCGLTGR                      | 230 | 15 | 8  | 29.44  | b4y1y2y3°y3y12y13y15                         | 1536.74 | 67.677  | 26963  | 2 | 768.88  | 8.74   |
| [P66764]METK_SALTY S-adenosylmethionine synthetase                        | 3  | Carbamidomethyl+C(10) | FVIGGPMGDCGLTGRK                     | 230 | 16 | 5  | 28.34  | b6b12b13y13y16                               | 1664.82 | 58.649  | 21869  | 2 | 832.91  | -3.74  |
| [P66764]METK_SALTY S-adenosylmethionine synthetase                        | 4  |                       | ADPLEQQAGDQGLMFGYATNET DVLMPAPITYAHR | 109 | 35 | 7  | 21.45  | b6°b6b7°b7b14y9y35                           | 3749.79 | 90.179  | 7643   | 3 | 1250.60 | 7.42   |
| [P66764]METK_SALTY S-adenosylmethionine synthetase                        | 5  |                       | NGTLPWLRPDAK                         | 154 | 12 | 5  | 34.25  | b3*b3b4b6y5                                  | 1367.71 | 46.436  | 40861  | 3 | 456.58  | -21.51 |
| [P66764]METK_SALTY S-adenosylmethionine synthetase                        | 6  |                       | ETAAYGHFGR                           | 353 | 10 | 4  | 39.34  | b4b7y7y9                                     | 1108.51 | 54.177  | 36880  | 2 | 554.76  | -6.17  |
| [P66764]METK_SALTY S-adenosylmethionine synthetase                        | 7  |                       | HLFTSESVSEGHDPK                      | 3   | 15 | 4  | 18.14  | b11°b11y5y11                                 | 1669.79 | 52.242  | 4337   | 2 | 835.40  | 7.60   |
| [P66764]METK_SALTY S-adenosylmethionine synthetase                        | 8  |                       | NIVAAGLADR                           | 284 | 10 | 3  | 26.91  | b4y4y7                                       | 999.58  | 68.101  | 3730   | 2 | 500.29  | 19.05  |
| [P66764]METK_SALTY S-adenosylmethionine synthetase                        | 9  | Carbamidomethyl+C(16) | EIGYVHSDMGFDANSCAVLSAIG K            | 74  | 24 | 6  | 23.61  | b3b11y4y14*y14y16                            | 2541.22 | 99.903  | 2149   | 3 | 847.75  | 19.60  |
| [P66764]METK_SALTY S-adenosylmethionine synthetase                        | 10 |                       | MAKHLFTSESVSEGHDPK                   | 0   | 18 | 5  | 24.82  | b13°b13y4y7y9                                | 1999.96 | 101.102 | 133351 | 3 | 667.32  | 1.65   |
| [P66764]METK_SALTY S-adenosylmethionine synthetase                        | 11 |                       | ETAAYGHFGRENFPWEK                    | 353 | 17 | 4  | 36.94  | b11y6y7y8                                    | 2038.94 | 123.273 | 2864   | 3 | 680.32  | -2.45  |

|                                                    |    |                                                      |                                       |     |    |    |       |                         |         |         |       |   |         |        |
|----------------------------------------------------|----|------------------------------------------------------|---------------------------------------|-----|----|----|-------|-------------------------|---------|---------|-------|---|---------|--------|
| [P66764]METK_SALTY S-adenosylmethionine synthetase | 12 | Carbamidomethyl+C(10)                                | FVIGGPMGDCGLTGRK                      | 230 | 16 | 4  | 27.67 | b7b9b13y13              | 1664.84 | 124.629 | 2828  | 2 | 832.92  | 7.48   |
| [P66764]METK_SALTY S-adenosylmethionine synthetase | 13 |                                                      | HLFTSESVSEGHPDKIADQISDAVLDAILQQDPK    | 3   | 34 | 5  | 24.28 | b6b8b10b11y5            | 3703.87 | 77.548  | 2551  | 4 | 926.72  | 5.41   |
| [P66764]METK_SALTY S-adenosylmethionine synthetase | 14 | Carbamidomethyl+C(10)<br>;Oxidation+M(7)             | FVIGGPMGDCGLTGR                       | 230 | 15 | 4  | 26.22 | y3°y3y6y13              | 1552.72 | 69.672  | 5316  | 2 | 776.87  | -0.79  |
| [P66764]METK_SALTY S-adenosylmethionine synthetase | 15 | Oxidation+M(9)                                       | IIVDTYGGMAR                           | 246 | 11 | 3  | 24.31 | b8b10y5                 | 1211.60 | 61.530  | 2404  | 2 | 606.30  | -10.78 |
| [P66764]METK_SALTY S-adenosylmethionine synthetase | 16 |                                                      | VLMPAPITYAHR                          | 132 | 12 | 0  | 12.13 |                         | 1368.76 | 90.158  | 11996 | 2 | 684.88  | 11.95  |
| [P05989]ILVC_SALTY Ketol-acid reductoisomerase     | 1  |                                                      | GFGVPTLIAVHPENDPQGEGMAIAK             | 167 | 25 | 10 | 41.52 | b2b3b4y1y2y7y8y14y21y25 | 2548.29 | 76.370  | 57804 | 3 | 850.10  | 2.97   |
| [P05989]ILVC_SALTY Ketol-acid reductoisomerase     | 2  |                                                      | DGAALGYSHGFNIVEVGEQIRK                | 123 | 22 | 6  | 20.87 | b2b3b13b15y17y22        | 2360.19 | 71.517  | 45729 | 3 | 787.40  | -3.00  |
| [P05989]ILVC_SALTY Ketol-acid reductoisomerase     | 3  |                                                      | ANYFNTLNL                             | 1   | 10 | 5  | 40.13 | b3y4y6y7y10             | 1225.64 | 66.844  | 35733 | 2 | 613.32  | 2.59   |
| [P05989]ILVC_SALTY Ketol-acid reductoisomerase     | 4  |                                                      | TAFETAPQYEGK                          | 336 | 12 | 8  | 65.92 | b4y4y6y7y8°y8y9y12      | 1341.63 | 40.707  | 19508 | 2 | 671.32  | -0.91  |
| [P05989]ILVC_SALTY Ketol-acid reductoisomerase     | 5  |                                                      | FMGRDEFADGASYLQGK                     | 21  | 17 | 5  | 27.4  | b3y2y7y8y10             | 1891.89 | 76.482  | 17531 | 3 | 631.30  | 13.10  |
| [P05989]ILVC_SALTY Ketol-acid reductoisomerase     | 6  |                                                      | LIQFGWETITEALK                        | 252 | 14 | 5  | 19.29 | b6b8y1y3y14             | 1648.89 | 105.246 | 17330 | 2 | 824.95  | -2.00  |
| [P05989]ILVC_SALTY Ketol-acid reductoisomerase     | 7  |                                                      | LVAEGTDPAYAEK                         | 239 | 13 | 4  | 20.64 | b3b11°b11y9             | 1363.67 | 46.398  | 6336  | 3 | 455.23  | 0.27   |
| [P05989]ILVC_SALTY Ketol-acid reductoisomerase     | 8  | Carbamidomethyl+C(6)                                 | VVIVGCGAQLNQGLNMR                     | 39  | 18 | 3  | 15.58 | b3y5y10                 | 1885.99 | 63.353  | 6183  | 2 | 943.50  | 8.41   |
| [P05989]ILVC_SALTY Ketol-acid reductoisomerase     | 9  |                                                      | DGAALGYSHGFNIVEVGEQIR                 | 123 | 21 | 4  | 13.88 | b5y7y12y21              | 2232.08 | 87.446  | 3634  | 3 | 744.70  | -12.80 |
| [P05989]ILVC_SALTY Ketol-acid reductoisomerase     | 10 |                                                      | LSNPAK                                | 276 | 6  | 1  | 13.62 | b3                      | 629.37  | 39.595  | 11948 | 1 | 629.37  | 7.95   |
| [P05989]ILVC_SALTY Ketol-acid reductoisomerase     | 11 |                                                      | VGTYEELIPQADLVVNLTDPK                 | 88  | 21 | 4  | 18.93 | b6b8y8y12               | 2314.23 | 114.056 | 3471  | 3 | 772.08  | 3.38   |
| [P05989]ILVC_SALTY Ketol-acid reductoisomerase     | 12 |                                                      | VGTYEELIPQADLVVNLTDPKQHS DVVR         | 88  | 28 | 3  | 11.71 | b3b11y20                | 3135.62 | 80.892  | 40413 | 4 | 784.66  | -5.06  |
| [P05989]ILVC_SALTY Ketol-acid reductoisomerase     | 13 | Carbamidomethyl+C(11)                                | DITVVMVAPKCPGTEVR                     | 145 | 17 | 4  | 29.91 | b3b14y7y8               | 1871.98 | 56.729  | 24729 | 2 | 936.49  | 1.96   |
| [P05989]ILVC_SALTY Ketol-acid reductoisomerase     | 14 | Carbamidomethyl+C(11)<br>;Carbamidomethyl+C(21)<br>) | SDLMGEQTILCGMLQAGSLLCFDKLVAEGTDPAYAEK | 215 | 37 | 9  | 34.37 | b3y3y4y6°y6y9y11°y11y13 | 4031.95 | 117.474 | 19833 | 3 | 1344.66 | 10.48  |
| [P05989]ILVC_SALTY Ketol-acid reductoisomerase     | 15 |                                                      | QGGITLMDRLSNPAK                       | 266 | 16 | 5  | 41.31 | b4b7b14y4y5             | 1731.88 | 70.712  | 10039 | 3 | 577.96  | -7.19  |
| [P05989]ILVC_SALTY Ketol-acid reductoisomerase     | 16 |                                                      | IGEQEYFDKGVLMIAMVK                    | 348 | 18 | 3  | 22.74 | b3b6b12                 | 2071.06 | 90.187  | 7094  | 2 | 1036.04 | 1.53   |
| [P05989]ILVC_SALTY Ketol-acid reductoisomerase     | 17 |                                                      | ANYFNTLNLRQQLAQLGK                    | 1   | 18 | 6  | 52.43 | b3b6b9b11b14y3          | 2092.13 | 89.012  | 5570  | 2 | 1046.57 | -2.22  |
| [P05989]ILVC_SALTY Ketol-acid reductoisomerase     | 18 | Carbamidomethyl+C(7)                                 | KVVIVGCGAQLNQGLNMR                    | 38  | 19 | 3  | 24.11 | y5y9y10                 | 2014.10 | 57.807  | 1949  | 2 | 1007.55 | 14.12  |
| [P05989]ILVC_SALTY Ketol-acid reductoisomerase     | 19 |                                                      | AWAAATGGHRAGVLESSFVAEVK               | 192 | 23 | 3  | 22.08 | b9b10y9                 | 2314.21 | 94.035  | 1631  | 3 | 772.07  | 5.17   |
| [P05989]ILVC_SALTY Ketol-acid reductoisomerase     | 20 | Phosphoryl STY(6)                                    | LVAEGTDPAYAEK                         | 239 | 13 | 3  | 20.64 | b5y4y6                  | 1443.63 | 38.811  | 10591 | 3 | 481.88  | -1.94  |
| [P05989]ILVC_SALTY Ketol-acid reductoisomerase     | 21 | Phosphoryl STY(4)                                    | KDITVVMVAPK                           | 144 | 11 | 3  | 24.31 | b3b9y9                  | 1280.67 | 56.100  | 4874  | 3 | 427.56  | 6.86   |
| [P05989]ILVC_SALTY Ketol-acid reductoisomerase     | 22 | Oxidation+M(6)                                       | SVQPLMKDGAALGYSHGFNIVEVGEQIR          | 116 | 28 | 5  | 14.91 | b7b13y3*y3y24           | 3031.56 | 132.436 | 91507 | 3 | 1011.19 | 8.54   |
| [P05989]ILVC_SALTY Ketol-acid reductoisomerase     | 23 | Oxidation+M(21)                                      | GFGVPTLIAVHPENDPQGEGMAIAK             | 167 | 25 | 4  | 12.41 | b4b14y12°y12            | 2564.26 | 112.290 | 15909 | 3 | 855.42  | -8.47  |

|                                                                                |    |                       |                                                  |     |    |    |        |                                                                  |         |         |       |   |         |        |
|--------------------------------------------------------------------------------|----|-----------------------|--------------------------------------------------|-----|----|----|--------|------------------------------------------------------------------|---------|---------|-------|---|---------|--------|
| [P05989]ILVC_SALTY Ketol-acid reductoisomerase                                 | 24 | Oxidation+M()         | HMDDIISGEFSSGMMADWANDDKK                         | 302 | 24 | 4  | 16.87  | b6b8y4y7                                                         | 2716.14 | 78.310  | 13880 | 3 | 906.05  | 3.60   |
| [P05989]ILVC_SALTY Ketol-acid reductoisomerase                                 | 25 | Oxidation+M(6)        | DITVVMVAPK                                       | 145 | 10 | 6  | 58.12  | b3°b3b4b5b7y7                                                    | 1088.61 | 28.657  | 3180  | 3 | 363.54  | 5.05   |
| [P69936]YDFG_SALTY NADP-dependent L-serine/L-allo-threonine dehydrogenase ydfG | 1  |                       | VTDIEPLVGGETESSVR                                | 171 | 18 | 15 | 100.81 | b1b2b5°b5b6b14y6°y6y7y8y9y11°y11y12y13                           | 1862.96 | 68.171  | 21833 | 2 | 931.98  | 4.98   |
| [P69936]YDFG_SALTY NADP-dependent L-serine/L-allo-threonine dehydrogenase ydfG | 2  |                       | AVLPGMVER                                        | 115 | 9  | 6  | 30.49  | b2b8y2°y2y5y7                                                    | 971.54  | 57.834  | 21169 | 2 | 486.27  | 7.35   |
| [P69936]YDFG_SALTY NADP-dependent L-serine/L-allo-threonine dehydrogenase ydfG | 3  |                       | GHIINIGSTAGSWPYAGGNVYGATK                        | 126 | 25 | 3  | 12.41  | b13y11y13                                                        | 2491.26 | 63.841  | 17397 | 4 | 623.57  | 7.55   |
| [P69936]YDFG_SALTY NADP-dependent L-serine/L-allo-threonine dehydrogenase ydfG | 4  |                       | AAIEEMMASLPAQWR                                  | 58  | 15 | 3  | 24.16  | b12b13y5                                                         | 1703.85 | 89.704  | 12311 | 2 | 852.43  | 13.04  |
| [P69936]YDFG_SALTY NADP-dependent L-serine/L-allo-threonine dehydrogenase ydfG | 5  |                       | TYENTTALTPEDITEAVVWVATLPAHVNINTVEMMPVTQSFAGLSVHR | 199 | 48 | 3  | 11.36  | b9b11y9                                                          | 5340.68 | 136.422 | 5504  | 4 | 1335.93 | 9.23   |
| [P69936]YDFG_SALTY NADP-dependent L-serine/L-allo-threonine dehydrogenase ydfG | 6  |                       | ASVEDWETMIDTNNK                                  | 93  | 15 | 5  | 29.44  | b5y5y8*y8y9                                                      | 1752.81 | 70.967  | 11913 | 2 | 876.91  | 17.69  |
| [P69936]YDFG_SALTY NADP-dependent L-serine/L-allo-threonine dehydrogenase ydfG | 7  |                       | DIDVLVNNAGLALGLEPAHK                             | 73  | 20 | 3  | 23.79  | b3b4b14                                                          | 2059.07 | 69.451  | 1968  | 3 | 687.03  | -21.58 |
| [P69936]YDFG_SALTY NADP-dependent L-serine/L-allo-threonine dehydrogenase ydfG | 8  |                       | GLIYMTRAVLPGMVER                                 | 108 | 16 | 3  | 17.16  | b3y8y10                                                          | 1805.96 | 82.733  | 14536 | 4 | 452.25  | -9.13  |
| [P69936]YDFG_SALTY NADP-dependent L-serine/L-allo-threonine dehydrogenase ydfG | 9  |                       | NRGHIINIGSTAGSWPYAGGNVYGATK                      | 124 | 27 | 10 | 36.23  | b3b10b13*b13b14y9°y9y12°y12y26                                   | 2761.36 | 99.307  | 4498  | 2 | 1381.18 | -8.31  |
| [P69936]YDFG_SALTY NADP-dependent L-serine/L-allo-threonine dehydrogenase ydfG | 10 | Carbamidomethyl+C(15) | MIVLVTGATAGFGECIARR                              | 0   | 19 | 3  | 22.72  | b14y9y10                                                         | 2022.05 | 53.765  | 2006  | 3 | 674.69  | -5.01  |
| [P69936]YDFG_SALTY NADP-dependent L-serine/L-allo-threonine dehydrogenase ydfG | 11 | Phosphoryl STY(8)     | GHIINIGSTAGSWPYAGGNVYGATK                        | 126 | 25 | 4  | 18.84  | b6b8b14y24                                                       | 2571.19 | 101.275 | 2361  | 4 | 643.55  | -0.85  |
| [P69936]YDFG_SALTY NADP-dependent L-serine/L-allo-threonine dehydrogenase ydfG | 12 | Oxidation+M(9)        | ASVEDWETMIDTNNK                                  | 93  | 15 | 3  | 18.14  | b3y3y5                                                           | 1768.76 | 33.445  | 29283 | 4 | 442.95  | -4.07  |
| [P69936]YDFG_SALTY NADP-dependent L-serine/L-allo-threonine dehydrogenase ydfG | 13 | Oxidation+M(6)        | AVLPGMVER                                        | 115 | 9  | 3  | 30.49  | b8y3y4                                                           | 987.54  | 49.721  | 8871  | 2 | 494.27  | 10.57  |
| [P69936]YDFG_SALTY NADP-dependent L-serine/L-allo-threonine dehydrogenase ydfG | 14 | Oxidation+M()         | AAIEEMMASLPAQWRDIDVLVNNAGLALGLEPAHK              | 58  | 35 | 3  | 23     | b4b5b11                                                          | 3759.88 | 135.604 | 2515  | 3 | 1253.96 | -10.71 |
| [P66692]RPIA_SALTY Ribose-5-phohate isomerase A                                | 1  |                       | AVGWAALQYVQPGTIVGVGTGSTAAHFIDALGTMK              | 8   | 35 | 24 | 176.79 | b2b3b6b7b8b9b10b11y4y6y7°y7y9y11y19y24y25°y25y26y27y28*y28y29y35 | 3487.83 | 106.948 | 71768 | 3 | 1163.28 | 6.65   |
| [P66692]RPIA_SALTY Ribose-5-phohate isomerase A                                | 2  | Carbamidomethyl+C(3)  | FICIADASK                                        | 112 | 9  | 6  | 38.27  | y1y2y4y5y7y9                                                     | 1024.51 | 49.900  | 26038 | 2 | 512.76  | -2.86  |
| [P66692]RPIA_SALTY Ribose-5-phohate isomerase A                                | 3  |                       | GADVALIGTPDGVK                                   | 201 | 14 | 8  | 52.26  | b5b6y1y2y5y6y7y14                                                | 1312.71 | 56.245  | 24242 | 2 | 656.86  | 0.28   |
| [P66692]RPIA_SALTY Ribose-5-phohate isomerase A                                | 4  |                       | GQIEGAVSSSDASTEK                                 | 43  | 16 | 5  | 24.86  | y4°y4y6y8y16                                                     | 1565.74 | 32.470  | 17024 | 2 | 783.37  | 7.64   |
| [P66692]RPIA_SALTY Ribose-5-phohate isomerase A                                | 5  |                       | GLGIHVFDLNEVDSLGIYVDGADEINGHMQMIK                | 61  | 33 | 7  | 21.93  | b3b5b11b21y10°y10*y10                                            | 3599.79 | 95.494  | 7165  | 3 | 1200.60 | 12.21  |

|                                                                   |    |                       |                                          |     |    |    |       |                                           |         |         |        |   |         |        |
|-------------------------------------------------------------------|----|-----------------------|------------------------------------------|-----|----|----|-------|-------------------------------------------|---------|---------|--------|---|---------|--------|
| [P66692 RPIA_SALTY Ribose-5-phohate isomerase A                   | 6  |                       | TQDELKK                                  | 1   | 7  | 4  | 37.46 | b1b3y4y5                                  | 861.46  | 19.593  | 2072   | 2 | 431.23  | -9.14  |
| [P66692 RPIA_SALTY Ribose-5-phohate isomerase A                   | 7  |                       | TIVK                                     | 215 | 4  | 1  | 12.82 | y3                                        | 460.31  | 51.913  | 6201   | 1 | 460.31  | -1.86  |
| [P66692 RPIA_SALTY Ribose-5-phohate isomerase A                   | 8  |                       | GGGAALTR                                 | 94  | 8  | 5  | 49.32 | b5y3y4°y4y6                               | 702.38  | 27.340  | 5661   | 1 | 702.38  | -19.12 |
| [P66692 RPIA_SALTY Ribose-5-phohate isomerase A                   | 9  |                       | QVDILGKFPLPEVIPMAR                       | 121 | 19 | 3  | 14.94 | b3y4y7                                    | 2122.19 | 99.399  | 31046  | 3 | 708.07  | -7.82  |
| [P66692 RPIA_SALTY Ribose-5-phohate isomerase A                   | 10 |                       | GQIEGAVSSSDASTEKLK                       | 43  | 18 | 4  | 22.98 | b3y9°y9y10                                | 1806.89 | 37.824  | 5731   | 3 | 602.97  | -8.85  |
| [P66692 RPIA_SALTY Ribose-5-phohate isomerase A                   | 11 | Oxidation+M(34)       | AVGWAAALQYVQPGTIVGVGTGST<br>AAHFIDALGTMK | 8   | 35 | 4  | 12.84 | b3b11y8y13                                | 3503.76 | 86.855  | 3626   | 3 | 1168.59 | -12.05 |
| [P66692 RPIA_SALTY Ribose-5-phohate isomerase A                   | 12 |                       | LGIHVFDLNEVDSLGIYVDGADEI<br>NGHMQMIK     | 62  | 32 | 0  | 11.32 |                                           | 3542.77 | 95.434  | 145496 | 5 | 709.36  | 11.16  |
| [P62405 RL5_SALTY 50S ribosomal protein L5                        | 1  |                       | LLDNAAADLTAISGQKPLITK                    | 48  | 21 | 11 | 45.83 | b3b5*b5b6b8b11y1y5y19y<br>21*y21          | 2153.21 | 74.407  | 43014  | 3 | 718.41  | -5.44  |
| [P62405 RL5_SALTY 50S ribosomal protein L5                        | 2  |                       | LMTEFNYSVMQVPR                           | 15  | 15 | 10 | 63.24 | b10*b10b13°b13y2y3y4y5<br>y8y13           | 1828.86 | 75.205  | 6083   | 3 | 610.29  | -5.07  |
| [P62405 RL5_SALTY 50S ribosomal protein L5                        | 3  |                       | ITLNMGVGEAIADK                           | 33  | 14 | 5  | 19.29 | b5b7b8°y11y14                             | 1431.76 | 64.263  | 4647   | 2 | 716.39  | 8.53   |
| [P62405 RL5_SALTY 50S ribosomal protein L5                        | 4  |                       | ITLNMGVGEAIADKK                          | 33  | 15 | 4  | 10.48 | b1b6*b6y11                                | 1559.84 | 61.020  | 4240   | 3 | 520.62  | -5.09  |
| [P62405 RL5_SALTY 50S ribosomal protein L5                        | 5  |                       | LHDYYKDEVVNK                             | 3   | 12 | 7  | 52.7  | b3°b3y5y6y8*y8y9                          | 1522.75 | 37.154  | 2614   | 3 | 508.26  | -1.44  |
| [P62405 RL5_SALTY 50S ribosomal protein L5                        | 6  |                       | LHDYYK                                   | 3   | 6  | 1  | 13.62 | y5                                        | 838.42  | 74.550  | 2485   | 1 | 838.42  | 13.18  |
| [P62405 RL5_SALTY 50S ribosomal protein L5                        | 7  |                       | DEVVNKLMTFNYSVMQVPR                      | 9   | 21 | 9  | 54.48 | b4b5b8*b8b9*b9y7y10y13                    | 2513.21 | 113.196 | 3655   | 3 | 838.41  | -3.30  |
| [Q8ZRC9 YAJQ_SALTY UPF0234 protein yajQ                           | 1  |                       | VLSEDFQVNQLLDILR                         | 49  | 17 | 13 | 53.84 | b2b9b12b14°b14*b14b15°<br>b15y2y3y4y13y17 | 1989.08 | 103.923 | 30765  | 2 | 995.04  | 7.43   |
| [Q8ZRC9 YAJQ_SALTY UPF0234 protein yajQ                           | 2  |                       | GIEGASLDVPDEFVHSGK                       | 72  | 18 | 7  | 41.99 | b3b7b14y6°y6y12y13                        | 1856.88 | 58.422  | 16642  | 3 | 619.63  | -10.32 |
| [Q8ZRC9 YAJQ_SALTY UPF0234 protein yajQ                           | 3  |                       | PSFDIVSEVDLQEAR                          | 1   | 15 | 12 | 96.67 | b7°b7b10y3°y3y5y6y7°y7y<br>8y9y10         | 1704.84 | 58.460  | 11754  | 2 | 852.92  | -2.15  |
| [Q8ZRC9 YAJQ_SALTY UPF0234 protein yajQ                           | 4  |                       | TWYVEAK                                  | 90  | 7  | 6  | 37.46 | b1b4°b4b5y3y7                             | 896.45  | 46.358  | 9564   | 2 | 448.73  | -1.29  |
| [Q8ZRC9 YAJQ_SALTY UPF0234 protein yajQ                           | 5  |                       | GGDLGQPFQFK                              | 148 | 11 | 3  | 24.31 | b3b9y6                                    | 1193.60 | 62.525  | 19068  | 2 | 597.30  | 5.42   |
| [Q8ZRC9 YAJQ_SALTY UPF0234 protein yajQ                           | 6  |                       | VQAQIQGEEIR                              | 120 | 11 | 3  | 24.31 | b4y6y8                                    | 1270.69 | 84.016  | 3794   | 3 | 424.23  | 11.91  |
| [Q8ZRC9 YAJQ_SALTY UPF0234 protein yajQ                           | 7  |                       | MPSFDIVSEVDLQEAR                         | 0   | 16 | 4  | 28.34 | b6y3y4y9                                  | 1835.87 | 48.294  | 2312   | 3 | 612.63  | -7.85  |
| [Q8ZRC9 YAJQ_SALTY UPF0234 protein yajQ                           | 8  |                       | RGIEGASLDVPDEFVHSGK                      | 71  | 19 | 4  | 23.66 | b6y5y8y17                                 | 2013.03 | 34.443  | 17044  | 3 | 671.68  | 13.46  |
| [Q8ZRC9 YAJQ_SALTY UPF0234 protein yajQ                           | 9  |                       | FDFRGVEATIELNDANK                        | 29  | 17 | 3  | 16.32 | b5y7y12                                   | 1938.95 | 94.812  | 1654   | 2 | 969.98  | -0.50  |
| [Q8ZRC9 YAJQ_SALTY UPF0234 protein yajQ                           | 10 | Phosphoryl STY(5)     | GVEATIELNDANK                            | 33  | 13 | 4  | 28.12 | y4°y4y8y9                                 | 1453.64 | 36.492  | 22792  | 3 | 485.22  | -4.62  |
| [P66869 SUCC_SALTY Succinyl-CoA ligase [ADP-forming] subunit beta | 1  |                       | VALDPLTGMPYQGR                           | 146 | 15 | 7  | 58.59 | b13y5y8y9y10y11y15                        | 1614.84 | 69.956  | 42872  | 2 | 807.92  | 6.73   |
| [P66869 SUCC_SALTY Succinyl-CoA ligase [ADP-forming] subunit beta | 2  | Carbamidomethyl+C(11) | YGLPAPVGYACTTPR                          | 14  | 15 | 7  | 51.57 | b5b10y4y10y11y12y15                       | 1622.81 | 60.411  | 30657  | 2 | 811.91  | 4.89   |
| [P66869 SUCC_SALTY Succinyl-CoA ligase [ADP-forming] subunit beta | 3  |                       | DLALIEINPLVITK                           | 191 | 14 | 8  | 45.27 | b2b4b5y2y3y6y9y14                         | 1551.94 | 96.908  | 19889  | 2 | 776.47  | 1.73   |



|                                                                  |    |                      |                                       |     |    |    |       |                                          |         |         |       |   |         |        |
|------------------------------------------------------------------|----|----------------------|---------------------------------------|-----|----|----|-------|------------------------------------------|---------|---------|-------|---|---------|--------|
| P66869 SUCC_SALTY Succinyl-CoA ligase [ADP-forming] subunit beta | 4  |                      | LVTYQTDANGQPVNQILVEAATDI GKELYLGAVVDR | 80  | 36 | 13 | 63.13 | b2b7b8°b8b10b13y1y3y4y6y7y8y36           | 3874.05 | 120.889 | 19598 | 3 | 1292.02 | 6.74   |
| P66869 SUCC_SALTY Succinyl-CoA ligase [ADP-forming] subunit beta | 5  |                      | IILSDDNVK                             | 303 | 9  | 7  | 38.27 | b2y5°y5y6y7°y7y9                         | 1016.56 | 42.919  | 19356 | 2 | 508.78  | -5.16  |
| P66869 SUCC_SALTY Succinyl-CoA ligase [ADP-forming] subunit beta | 6  |                      | LHGGEPANFLDVGGGATK                    | 277 | 18 | 4  | 13.5  | b7°b10*b10b15                            | 1739.85 | 58.312  | 11527 | 3 | 580.62  | -10.45 |
| P66869 SUCC_SALTY Succinyl-CoA ligase [ADP-forming] subunit beta | 7  |                      | LEGNNAELGAK                           | 348 | 11 | 3  | 31.29 | y5y9y10                                  | 1115.57 | 28.191  | 20814 | 2 | 558.29  | -0.22  |
| P66869 SUCC_SALTY Succinyl-CoA ligase [ADP-forming] subunit beta | 8  |                      | LGADGNALFR                            | 215 | 10 | 5  | 40.13 | b4°b4b8b9y8                              | 1033.54 | 31.200  | 9786  | 2 | 517.28  | 1.65   |
| P66869 SUCC_SALTY Succinyl-CoA ligase [ADP-forming] subunit beta | 9  |                      | VAEETPHLIHK                           | 135 | 11 | 3  | 36.07 | b5b7b10                                  | 1273.68 | 59.969  | 2199  | 3 | 425.23  | -4.98  |
| P66869 SUCC_SALTY Succinyl-CoA ligase [ADP-forming] subunit beta | 10 |                      | AFAENWL GK                            | 70  | 9  | 7  | 61.7  | b3b4b5*b5b6y6*y6                         | 1035.51 | 38.369  | 1547  | 2 | 518.26  | -17.92 |
| P66869 SUCC_SALTY Succinyl-CoA ligase [ADP-forming] subunit beta | 11 |                      | LHGGEPANFLDVGGGATKER                  | 277 | 20 | 4  | 30.75 | b4b10b12b13                              | 2025.00 | 79.619  | 15460 | 3 | 675.67  | -8.20  |
| P66869 SUCC_SALTY Succinyl-CoA ligase [ADP-forming] subunit beta | 12 | Oxidation+M(4)       | VVFMASTEGGVEIEK                       | 120 | 15 | 4  | 24.16 | b11y9y10°y10                             | 1611.77 | 86.413  | 2251  | 3 | 537.93  | -13.10 |
| P66869 SUCC_SALTY Succinyl-CoA ligase [ADP-forming] subunit beta | 13 |                      | LHGGEPANFLDVGGGAT                     | 277 | 17 | 1  | 7.34  | y12                                      | 1611.78 | 58.365  | 2628  | 2 | 806.39  | -0.23  |
| P0A1P6 GLNA_SALTY Glutamine synthetase                           | 1  |                      | LVPGYEAPVMLAYSAR                      | 322 | 16 | 6  | 51.89 | b15y4y5y9y11y14                          | 1736.92 | 76.659  | 53230 | 2 | 868.96  | 6.89   |
| P0A1P6 GLNA_SALTY Glutamine synthetase                           | 2  | Carbamidomethyl+C(1) | CDILEPGTLQGYDRDPR                     | 89  | 17 | 8  | 36.73 | b2b3b10b12*b12b15y1y2                    | 2004.94 | 58.891  | 50177 | 3 | 668.98  | -2.80  |
| P0A1P6 GLNA_SALTY Glutamine synthetase                           | 3  |                      | AINALANPTTNSYKR                       | 307 | 15 | 9  | 59.35 | b3*b3b11y7°*y7y8y9y10y15                 | 1633.86 | 41.584  | 35548 | 3 | 545.29  | -2.24  |
| P0A1P6 GLNA_SALTY Glutamine synthetase                           | 4  |                      | GGYFPVPPVDSAQDIR                      | 177 | 16 | 10 | 56.16 | b2b3b4b6b14y2y6y10y11y16                 | 1717.87 | 69.060  | 33567 | 2 | 859.44  | 7.96   |
| P0A1P6 GLNA_SALTY Glutamine synthetase                           | 5  |                      | EIPQVAGSLEEALNALDLDR                  | 406 | 20 | 5  | 14.37 | b11y10y13°y13y20                         | 2153.09 | 95.066  | 24339 | 3 | 718.37  | -6.69  |
| P0A1P6 GLNA_SALTY Glutamine synthetase                           | 6  |                      | ATGIADTVLFGPEPEFFLDDIR                | 117 | 23 | 16 | 64.53 | b3°b3b4°b4b6b13°b13y1y2y4y5y8y9°y9y13y23 | 2570.28 | 116.642 | 17352 | 3 | 857.43  | -0.76  |
| P0A1P6 GLNA_SALTY Glutamine synthetase                           | 7  |                      | FGASISGSHVAIDDIEGAWNSSTK              | 140 | 24 | 7  | 32.9  | b4b14y5y6y8y12y24                        | 2449.15 | 75.788  | 16449 | 3 | 817.05  | -6.98  |
| P0A1P6 GLNA_SALTY Glutamine synthetase                           | 8  |                      | GINESDMVLPDASTAVIDPFFADSTLIIR         | 59  | 30 | 11 | 52.84 | b9°b9b10*b10y2y3y4y7y8y11y30             | 3238.62 | 112.941 | 16358 | 3 | 1080.21 | 4.98   |
| P0A1P6 GLNA_SALTY Glutamine synthetase                           | 9  |                      | AINALANPTTNSYK                        | 307 | 14 | 3  | 27.86 | y7y9y13                                  | 1477.76 | 46.712  | 12099 | 2 | 739.39  | -0.91  |
| P0A1P6 GLNA_SALTY Glutamine synthetase                           | 10 |                      | EIPQVAGSLEEALNALDLREFLK               | 406 | 24 | 11 | 47.75 | b2b5b8b10°b10b12b13°b13y11y13y20         | 2670.40 | 111.642 | 12034 | 3 | 890.80  | -0.91  |
| P0A1P6 GLNA_SALTY Glutamine synthetase                           | 11 |                      | MTPHPVEFELYYSV                        | 455 | 14 | 3  | 19.29 | b5y4y12                                  | 1711.83 | 66.423  | 7144  | 3 | 571.28  | 13.12  |
| P0A1P6 GLNA_SALTY Glutamine synthetase                           | 12 |                      | AGGVFTDEAIDAYIALR                     | 430 | 17 | 3  | 23.72 | b9b12b16                                 | 1781.90 | 91.597  | 4535  | 2 | 891.45  | -3.15  |
| P0A1P6 GLNA_SALTY Glutamine synthetase                           | 13 |                      | ADEIQIYK                              | 232 | 8  | 5  | 40.87 | b4°b4b5°b5b6                             | 979.52  | 60.911  | 17257 | 2 | 490.26  | 6.29   |
| P0A1P6 GLNA_SALTY Glutamine synthetase                           | 14 |                      | YAGLSEQALYYIGGVIK                     | 287 | 17 | 3  | 24.97 | b4b5b13                                  | 1845.01 | 77.141  | 10608 | 2 | 923.01  | 16.34  |

|                                            |    |                                       |                                   |     |    |    |       |                                |         |         |       |   |         |        |
|--------------------------------------------|----|---------------------------------------|-----------------------------------|-----|----|----|-------|--------------------------------|---------|---------|-------|---|---------|--------|
| [P0A1P6 GLNA_SALTY Glutamine synthetase    | 15 | Carbamidomethyl+C(11)                 | FPDPAANPYLCFAALLMAGLDGIK          | 360 | 24 | 7  | 27.59 | b15°b15*b15b16b23y4y6          | 2565.32 | 136.534 | 10256 | 2 | 1283.16 | 12.56  |
| [P0A1P6 GLNA_SALTY Glutamine synthetase    | 16 |                                       | MSAEHVLTMLNEHEVK                  | 0   | 16 | 4  | 17.16 | b8°b8y5y8                      | 1867.92 | 86.893  | 8138  | 2 | 934.46  | 7.71   |
| [P0A1P6 GLNA_SALTY Glutamine synthetase    | 17 |                                       | IHPGEAMDK                         | 386 | 9  | 3  | 30.49 | b8y3y6                         | 997.45  | 26.670  | 5246  | 2 | 499.23  | -22.33 |
| [P0A1P6 GLNA_SALTY Glutamine synthetase    | 18 |                                       | SAEHVLTMLNEHEVK                   | 1   | 15 | 3  | 18.14 | b3y5y10                        | 1736.84 | 55.579  | 4570  | 4 | 434.97  | -13.35 |
| [P0A1P6 GLNA_SALTY Glutamine synthetase    | 19 |                                       | EQHVTIPAHQVNAEFFEEGK              | 28  | 20 | 4  | 14.37 | b4y5°y5y19                     | 2310.13 | 60.974  | 2983  | 4 | 578.29  | 7.29   |
| [P0A1P6 GLNA_SALTY Glutamine synthetase    | 20 |                                       | FNTMTK                            | 225 | 6  | 1  | 13.62 | b5                             | 741.35  | 30.405  | 2440  | 1 | 741.35  | -13.50 |
| [P0A1P6 GLNA_SALTY Glutamine synthetase    | 21 |                                       | FGASISGSHVAIDIEGAWNSSTK YEGGNK    | 140 | 30 | 4  | 21.97 | b5b7b8y3                       | 3097.46 | 51.018  | 37198 | 3 | 1033.16 | 4.65   |
| [P0A1P6 GLNA_SALTY Glutamine synthetase    | 22 |                                       | EFLKAGGVTFDEAIDAYIALR             | 426 | 21 | 3  | 13.88 | b7b13y11                       | 2299.17 | 73.341  | 16163 | 3 | 767.06  | -12.00 |
| [P0A1P6 GLNA_SALTY Glutamine synthetase    | 23 |                                       | GKEQHVTIPAHQVNAEFFEEGK            | 26  | 22 | 3  | 19.95 | y5y9y20                        | 2495.23 | 106.342 | 15995 | 3 | 832.42  | 0.29   |
| [P0A1P6 GLNA_SALTY Glutamine synthetase    | 24 |                                       | NGTNLFSGDKYAGLSEQALYYIG GVIK      | 277 | 27 | 5  | 25.89 | b3*b3b5b10b14                  | 2878.49 | 110.869 | 11397 | 3 | 960.17  | 8.31   |
| [P0A1P6 GLNA_SALTY Glutamine synthetase    | 25 |                                       | VRMTPHPVEFELYYSV                  | 453 | 16 | 3  | 23.69 | b8b9y11                        | 1966.97 | 61.350  | 3005  | 2 | 983.99  | -4.16  |
| [P0A1P6 GLNA_SALTY Glutamine synthetase    | 26 |                                       | MSAEHVLTMLNEHEVKFVDLR             | 0   | 21 | 4  | 22.33 | b11*b11b12y10                  | 2498.28 | 133.722 | 2404  | 3 | 833.43  | 10.65  |
| [P0A1P6 GLNA_SALTY Glutamine synthetase    | 27 | Phosphoryl STY(7)                     | SAEHVLTMLNEHEVK                   | 1   | 15 | 4  | 18.14 | b5b12_HPO3 b12y7°y7            | 1816.82 | 69.071  | 35357 | 2 | 908.91  | -1.48  |
| [P0A1P6 GLNA_SALTY Glutamine synthetase    | 28 | Phosphoryl STY(6)                     | AGGVTFDEAIDAYIALR                 | 430 | 17 | 3  | 16.32 | b3b5y11                        | 1861.87 | 69.730  | 2015  | 3 | 621.29  | 2.82   |
| [P0A1P6 GLNA_SALTY Glutamine synthetase    | 29 | Carbamidomethyl+C(4); Oxidation+M()   | SEMCLVMEQMGLVVEAHHHEVA TAGQNEVATR | 193 | 32 | 5  | 16.96 | y9y11°y11y14°y14               | 3579.69 | 96.535  | 5866  | 3 | 1193.90 | 12.96  |
| [P0A1P6 GLNA_SALTY Glutamine synthetase    | 30 | Carbamidomethyl+C(11);Oxidation+M(17) | FPDPAANPYLCFAALLMAGLDGIK          | 360 | 24 | 3  | 23    | b5b6b8                         | 2581.29 | 85.384  | 4620  | 3 | 861.10  | 1.99   |
| [P0A1P6 GLNA_SALTY Glutamine synthetase    | 31 |                                       | AINALANPTTNSY                     | 307 | 13 | 0  | 4.04  |                                | 1349.69 | 41.640  | 23544 | 3 | 450.57  | 12.75  |
| [P0A1P6 GLNA_SALTY Glutamine synthetase    | 32 |                                       | NALANPTTNSYKR                     | 309 | 13 | 1  | 7.26  | b8                             | 1449.75 | 41.554  | 3105  | 2 | 725.38  | 0.84   |
| [P0A1P6 GLNA_SALTY Glutamine synthetase    | 33 | Carbamidomethyl+C(1)                  | CDILEPGTLQGYDRDPR                 | 89  | 17 | 0  | 4.85  |                                | 1986.93 | 58.887  | 2818  | 3 | 662.98  | -0.61  |
| [P60446 RL3_SALTY 50S ribosomal protein L3 | 1  |                                       | VTVQSLDVVR                        | 169 | 10 | 11 | 74.35 | b2°b2b4°b4y2y3y5y6y7y8y10      | 1115.64 | 55.374  | 84796 | 2 | 558.32  | -5.03  |
| [P60446 RL3_SALTY 50S ribosomal protein L3 | 2  |                                       | IFTEDGVSIPTVIEVEANR               | 13  | 20 | 12 | 60.32 | b2b5b7b9y4y5y6°y6y11y13*y13y20 | 2188.17 | 87.413  | 46586 | 2 | 1094.59 | 10.26  |
| [P60446 RL3_SALTY 50S ribosomal protein L3 | 3  | Carbamidomethyl+C(9)                  | GGVPGATGCDLIVKPAVK                | 190 | 18 | 7  | 37    | b12y1y4y6y8y15y18              | 1738.93 | 52.876  | 27889 | 3 | 580.32  | -10.46 |
| [P60446 RL3_SALTY 50S ribosomal protein L3 | 4  |                                       | VTKPEAGHFAK                       | 59  | 11 | 5  | 36.73 | b2b7b8b10y6                    | 1184.63 | 23.397  | 3551  | 2 | 592.82  | -11.33 |
| [P60446 RL3_SALTY 50S ribosomal protein L3 | 5  |                                       | LAEGEETYVGQSIGVELFADV K           | 83  | 22 | 3  | 13.44 | b6b11y9                        | 2384.20 | 136.273 | 2736  | 3 | 795.41  | 7.07   |
| [P60446 RL3_SALTY 50S ribosomal protein L3 | 6  |                                       | LAEGEETYVGQSIGVELFADV K K         | 83  | 23 | 3  | 19.46 | b8b11b14                       | 2512.27 | 89.489  | 1789  | 4 | 628.82  | -5.64  |
| [P60446 RL3_SALTY 50S ribosomal protein L3 | 7  |                                       | NLLLVK                            | 184 | 6  | 3  | 40.07 | b3y3y4                         | 699.48  | 55.187  | 22536 | 1 | 699.48  | -1.05  |
| [P60446 RL3_SALTY 50S ribosomal protein L3 | 8  |                                       | GLWEFR                            | 77  | 6  | 1  | 13.62 | y4                             | 807.41  | 68.778  | 16819 | 2 | 404.21  | -6.58  |
| [P60446 RL3_SALTY 50S ribosomal protein L3 | 9  |                                       | VGMTR                             | 8   | 5  | 1  | 13.22 | y3                             | 563.29  | 48.976  | 16343 | 1 | 563.29  | -4.77  |
| [P60446 RL3_SALTY 50S ribosomal protein L3 | 10 |                                       | TQDATHGNSLSHR                     | 128 | 13 | 5  | 58.54 | y3y4y5y7y11                    | 1423.65 | 14.799  | 14277 | 3 | 475.22  | -13.55 |

|                                                     |    |                      |                                            |     |    |    |       |                                  |         |         |       |   |         |        |
|-----------------------------------------------------|----|----------------------|--------------------------------------------|-----|----|----|-------|----------------------------------|---------|---------|-------|---|---------|--------|
| [P60446]RL3_SALTY 50S ribosomal protein L3          | 11 |                      | MAGQMGNER                                  | 160 | 9  | 4  | 38.27 | y4y6°y6y7                        | 993.44  | 19.676  | 8596  | 2 | 497.22  | 14.19  |
| [P60446]RL3_SALTY 50S ribosomal protein L3          | 12 |                      | VDAER                                      | 179 | 5  | 1  | 13.22 | y4                               | 589.29  | 66.420  | 1691  | 1 | 589.29  | -14.60 |
| [P60446]RL3_SALTY 50S ribosomal protein L3          | 13 | Carbamidomethyl+C(9) | GGVPGATGCDLIVKPAVKA                        | 190 | 19 | 9  | 74.65 | b3b8b9y5y7y8y12y13y16            | 1809.98 | 55.112  | 65174 | 3 | 604.00  | -7.22  |
| [P60446]RL3_SALTY 50S ribosomal protein L3          | 14 |                      | IFTEDGVSPVTVIEVEANRVTVK                    | 13  | 25 | 3  | 12.41 | b7y16y18                         | 2743.49 | 94.226  | 22946 | 3 | 915.17  | 0.27   |
| [P60446]RL3_SALTY 50S ribosomal protein L3          | 15 |                      | VTVQSLDVVRVDAER                            | 169 | 15 | 5  | 18.14 | b5°b5b7y3°y3                     | 1685.91 | 103.741 | 3355  | 2 | 843.46  | -6.37  |
| [P60446]RL3_SALTY 50S ribosomal protein L3          | 16 |                      | WNFRTQDATHGNSLSHR                          | 124 | 17 | 4  | 16.32 | b8y8y10°y10                      | 2026.94 | 51.797  | 2540  | 3 | 676.32  | -11.50 |
| [Q8ZQM3]GSIB_SALTY Glutathione-binding protein gSiB | 1  |                      | NLTGFWIMPDTGFSDDADLK                       | 491 | 21 | 8  | 13.88 | b2b6b8°b8°b8y2y13y21             | 2390.13 | 106.184 | 36878 | 2 | 1195.57 | 10.52  |
| [Q8ZQM3]GSIB_SALTY Glutathione-binding protein gSiB | 2  |                      | DIGFHPVGTGPYQLETWNQTDV<br>K                | 176 | 24 | 7  | 50.35 | b9b10b11y7y9y10y24               | 2749.35 | 82.334  | 23236 | 3 | 917.12  | 7.81   |
| [Q8ZQM3]GSIB_SALTY Glutathione-binding protein gSiB | 3  |                      | FQDGADFNAAVK                               | 97  | 13 | 8  | 50.3  | b2b3y5y6y10y11°y11y13            | 1353.65 | 48.405  | 20335 | 2 | 677.33  | 3.34   |
| [Q8ZQM3]GSIB_SALTY Glutathione-binding protein gSiB | 4  |                      | ITAMDAGQR                                  | 379 | 9  | 4  | 30.49 | b2b4y7y8                         | 962.47  | 28.192  | 16956 | 2 | 481.74  | -6.47  |
| [Q8ZQM3]GSIB_SALTY Glutathione-binding protein gSiB | 5  |                      | LDSITWRPVTDNNT                             | 214 | 15 | 6  | 36.71 | y4°y4y11°y11y13y14               | 1787.90 | 55.624  | 15958 | 3 | 596.64  | -2.05  |
| [Q8ZQM3]GSIB_SALTY Glutathione-binding protein gSiB | 6  |                      | TEVVDPATVK                                 | 134 | 10 | 12 | 75.32 | b1b2°b2b6°b6b7y2y5y6y8y<br>9y10  | 1058.57 | 37.904  | 15781 | 2 | 529.79  | -4.04  |
| [Q8ZQM3]GSIB_SALTY Glutathione-binding protein gSiB | 7  |                      | AAMLQTGEAQFAPIPYEAALLA<br>K                | 229 | 25 | 4  | 27.87 | b3b4b6b9                         | 2679.40 | 96.355  | 15588 | 3 | 893.80  | 4.10   |
| [Q8ZQM3]GSIB_SALTY Glutathione-binding protein gSiB | 8  |                      | ELLKEAGYPDGFSTTLWSSHNS<br>TAQK             | 335 | 27 | 3  | 21.91 | b9b10y6                          | 3004.41 | 65.232  | 10042 | 4 | 751.86  | -10.24 |
| [Q8ZQM3]GSIB_SALTY Glutathione-binding protein gSiB | 9  |                      | NLELVASPSIMQR                              | 256 | 13 | 5  | 20.64 | b1b3°b3y6y12                     | 1457.76 | 59.337  | 5849  | 3 | 486.59  | -11.97 |
| [Q8ZQM3]GSIB_SALTY Glutathione-binding protein gSiB | 10 |                      | NVLAEGYTVSDDGLTYTITLR                      | 72  | 21 | 6  | 20.52 | b5°b5b7b10°b10°b10               | 2301.17 | 86.824  | 2341  | 4 | 576.05  | 2.55   |
| [Q8ZQM3]GSIB_SALTY Glutathione-binding protein gSiB | 11 |                      | YISMNVTQKPFDNPK                            | 269 | 15 | 7  | 52.36 | b4b5b9°b9b10°b10b12              | 1781.92 | 75.273  | 12171 | 3 | 594.64  | 15.21  |
| [Q8ZQM3]GSIB_SALTY Glutathione-binding protein gSiB | 12 |                      | FAGYWQQGLPK                                | 203 | 11 | 5  | 38.32 | b3b4y6°y6y10                     | 1294.64 | 43.603  | 1667  | 3 | 432.22  | -16.59 |
| [Q8ZQM3]GSIB_SALTY Glutathione-binding protein gSiB | 13 |                      | QALVKVAFAGYATPATGVVPPSI<br>AYAQSYQPWPYPDAK | 295 | 38 | 4  | 16.47 | y5y8y12°y12                      | 4023.05 | 82.287  | 12747 | 4 | 1006.52 | -5.70  |
| [Q8ZQM3]GSIB_SALTY Glutathione-binding protein gSiB | 14 |                      | DIGFHPVGTGPYQLETWNQTDV<br>KVK              | 176 | 26 | 3  | 12.14 | b7b12y10                         | 2976.48 | 55.594  | 9830  | 4 | 744.88  | -2.71  |
| [Q8ZQM3]GSIB_SALTY Glutathione-binding protein gSiB | 15 |                      | QGVKFQDGADFNAAVK                           | 93  | 17 | 3  | 16.32 | b10y5y12                         | 1765.87 | 78.261  | 9284  | 2 | 883.44  | -7.95  |
| [Q8ZQM3]GSIB_SALTY Glutathione-binding protein gSiB | 16 |                      | SFYQGLFGLDKDMK                             | 56  | 14 | 11 | 91.83 | b3b4°b4b8b10b12°b12y3y<br>7y8y13 | 1648.80 | 68.201  | 7015  | 2 | 824.90  | -1.78  |
| [Q8ZQM3]GSIB_SALTY Glutathione-binding protein gSiB | 17 |                      | ASNPDNHLKR                                 | 115 | 10 | 3  | 33.9  | y3y6y7                           | 1151.59 | 14.517  | 4770  | 2 | 576.30  | -3.39  |
| [Q8ZQM3]GSIB_SALTY Glutathione-binding protein gSiB | 18 |                      | QVDSDLAAALKTNDPQEK                         | 442 | 18 | 6  | 26.58 | b3y8°y8y9°y9y13                  | 1942.97 | 82.739  | 2068  | 3 | 648.33  | -0.57  |
| [Q8ZQM3]GSIB_SALTY Glutathione-binding protein gSiB | 19 |                      | YGKDIGHFPVGTGPYQLETWNQT<br>DFVK            | 173 | 27 | 4  | 15.33 | b4b7y5y10                        | 3097.47 | 132.457 | 1602  | 3 | 1033.16 | -12.53 |
| [Q8ZQM3]GSIB_SALTY Glutathione-binding protein gSiB | 20 | Phosphoryl STY(15)   | YGKDIGHFPVGTGPYQLETWNQT<br>DFVK            | 173 | 27 | 3  | 11.91 | b8b13y12                         | 3177.43 | 78.385  | 4250  | 3 | 1059.81 | -10.68 |
| [Q8ZQM3]GSIB_SALTY Glutathione-binding protein gSiB | 21 | Phosphoryl STY(8)    | TEVVDPATVK                                 | 134 | 10 | 4  | 28.67 | b6°b6y4y5                        | 1138.53 | 96.034  | 3922  | 1 | 1138.53 | 1.50   |
| [Q8ZQM3]GSIB_SALTY Glutathione-binding protein gSiB | 22 | Phosphoryl STY(7)    | NLELVASPSIMQR                              | 256 | 13 | 4  | 20.64 | b3b6°b6y6                        | 1537.73 | 52.114  | 2177  | 2 | 769.37  | -0.08  |
| [Q8ZQM3]GSIB_SALTY Glutathione-binding protein gSiB | 23 | Oxidation+M(13)      | SFYQGLFGLDKDMK                             | 56  | 14 | 4  | 19.29 | b12y3y12°y12                     | 1664.80 | 136.530 | 4517  | 1 | 1664.80 | 1.76   |

|                                                  |    |                       |                                                     |     |    |    |        |                                                           |         |         |        |   |         |        |
|--------------------------------------------------|----|-----------------------|-----------------------------------------------------|-----|----|----|--------|-----------------------------------------------------------|---------|---------|--------|---|---------|--------|
| P66593 RS6_SALTY 30S ribosomal protein S6        | 1  |                       | AHYVLMNVEAPQEVIDELETTFR                             | 56  | 23 | 7  | 23.8   | b2b10y2y4y5°y5y13                                         | 2704.32 | 110.039 | 160701 | 3 | 902.11  | -1.99  |
| P66593 RS6_SALTY 30S ribosomal protein S6        | 2  |                       | YSAAITGAEGK                                         | 24  | 11 | 12 | 73.97  | b2°b2b3°b3b11y2y3y4y5y7y9y11                              | 1067.53 | 32.331  | 90118  | 2 | 534.27  | -6.29  |
| P66593 RS6_SALTY 30S ribosomal protein S6        | 3  |                       | FNDAVIR                                             | 79  | 7  | 6  | 63.9   | b5y3y4y5y6y7                                              | 834.44  | 40.868  | 79762  | 2 | 417.72  | -10.24 |
| P66593 RS6_SALTY 30S ribosomal protein S6        | 4  |                       | HYEIVFMVHPDQSEQVPGMIER                              | 2   | 22 | 5  | 23.31  | b6°b6b8b9°b9                                              | 2641.22 | 37.305  | 3656   | 3 | 881.08  | -13.31 |
| P66593 RS6_SALTY 30S ribosomal protein S6        | 5  |                       | LEDWGR                                              | 38  | 6  | 3  | 43.08  | b3y3y5                                                    | 775.38  | 37.249  | 2630   | 1 | 775.38  | 13.70  |
| P66593 RS6_SALTY 30S ribosomal protein S6        | 6  |                       | SMVMR                                               | 86  | 5  | 2  | 13.22  | b4°b4                                                     | 623.30  | 94.030  | 1952   | 1 | 623.30  | -0.88  |
| P66593 RS6_SALTY 30S ribosomal protein S6        | 7  |                       | HYEIVFMVHPDQSEQVPGMIERYSAAITGAEGK                   | 2   | 33 | 5  | 11.06  | b7°b7b22°b22y3                                            | 3689.72 | 101.845 | 8433   | 4 | 923.19  | -13.70 |
| P0A1W6 LIVK_SALTY Leucine-ecific-binding protein | 1  |                       | TAGLDSSQGPTAAK                                      | 139 | 14 | 12 | 80.95  | b5°b5b10b12y5y6°y6y8y10°y10y12y14                         | 1303.65 | 27.851  | 40919  | 2 | 652.33  | 0.75   |
| P0A1W6 LIVK_SALTY Leucine-ecific-binding protein | 2  |                       | TQFMGPEGVGNASLSNIAGGAAEGMLVTMPK                     | 242 | 31 | 13 | 38.38  | b2°b2b3b4°b4b9y1y2y3y4y10y13y31                           | 3035.47 | 91.889  | 31994  | 3 | 1012.49 | 2.25   |
| P0A1W6 LIVK_SALTY Leucine-ecific-binding protein | 3  |                       | GYQYIMR                                             | 132 | 7  | 5  | 40.47  | b3y2y4y6*y6                                               | 930.46  | 46.395  | 29491  | 2 | 465.73  | 9.77   |
| P0A1W6 LIVK_SALTY Leucine-ecific-binding protein | 4  |                       | LQKENIDFVYYGGYYPEMGMLR                              | 211 | 23 | 7  | 28.24  | b9°b9b12°b12y9y10y12                                      | 2814.34 | 84.169  | 26198  | 3 | 938.79  | 5.90   |
| P0A1W6 LIVK_SALTY Leucine-ecific-binding protein | 5  |                       | QGNANIVFFDGITAGEK                                   | 186 | 17 | 4  | 23.72  | b8b12°b12b16                                              | 1780.87 | 66.810  | 4941   | 2 | 890.94  | -8.84  |
| P0A1W6 LIVK_SALTY Leucine-ecific-binding protein | 6  |                       | VAIVGAMSGPVAQWGDMEFNGAR                             | 27  | 23 | 6  | 31.63  | b3b8b15y5y7y15                                            | 2363.17 | 86.656  | 52136  | 3 | 788.40  | 19.63  |
| P0A1W6 LIVK_SALTY Leucine-ecific-binding protein | 7  | Carbamidomethyl+C(10) | LVGVEYDDACDPK                                       | 66  | 13 | 3  | 20.64  | b6y9y11                                                   | 1480.67 | 45.784  | 22900  | 2 | 740.84  | 5.77   |
| P0A1W6 LIVK_SALTY Leucine-ecific-binding protein | 8  |                       | ENIDFVYYGGYYPEMGMLR                                 | 214 | 20 | 4  | 23.79  | y7*y7y8y12                                                | 2445.13 | 89.821  | 11006  | 2 | 1223.07 | 15.58  |
| P0A1W6 LIVK_SALTY Leucine-ecific-binding protein | 9  |                       | SASHAPLDLVK                                         | 316 | 11 | 4  | 36.07  | b4b7b9°b9                                                 | 1137.60 | 36.429  | 4581   | 2 | 569.30  | -22.32 |
| P0A1W6 LIVK_SALTY Leucine-ecific-binding protein | 10 |                       | WDEK                                                | 342 | 4  | 1  | 12.82  | y3                                                        | 577.26  | 74.717  | 4229   | 1 | 577.26  | 1.16   |
| P0A1W6 LIVK_SALTY Leucine-ecific-binding protein | 11 |                       | GFEFGVFQWHADGSSTVAK                                 | 350 | 19 | 3  | 24.11  | y8y11y12                                                  | 2069.97 | 57.858  | 2357   | 3 | 690.66  | -1.06  |
| P0A1W6 LIVK_SALTY Leucine-ecific-binding protein | 12 |                       | RYDQDPANK                                           | 273 | 9  | 3  | 30.49  | b3b5y4                                                    | 1106.52 | 15.266  | 7740   | 2 | 553.76  | -6.51  |
| P0A1W6 LIVK_SALTY Leucine-ecific-binding protein | 13 |                       | LQKENIDFVYYGGYYPEMGMLR                              | 211 | 23 | 3  | 13.05  | b10b12y6                                                  | 2814.35 | 86.558  | 4165   | 3 | 938.79  | 6.85   |
| P0A1W6 LIVK_SALTY Leucine-ecific-binding protein | 14 |                       | QQYGEGLARSVQDGLK                                    | 170 | 16 | 3  | 25.53  | b3b8b9                                                    | 1748.91 | 78.285  | 3473   | 2 | 874.96  | 9.21   |
| P0A1W6 LIVK_SALTY Leucine-ecific-binding protein | 15 |                       | ANGADTVIGPLKWDEK                                    | 330 | 16 | 6  | 41.31  | b5b8b10°b10y5y6                                           | 1713.86 | 40.851  | 1582   | 2 | 857.43  | -13.25 |
| Q8ZQ40 WRBA_SALTY Flavoprotein wrbA              | 1  |                       | TQNAPVATPQELADYDAIIFGTPT R                          | 54  | 25 | 9  | 33.43  | b2b9°b9b11b24y6y7y21y25                                   | 2689.36 | 89.162  | 20447  | 3 | 897.12  | 4.45   |
| Q8ZQ40 WRBA_SALTY Flavoprotein wrbA              | 2  |                       | LGSVFSSTGTGGGQEQTITSTWTT LAHHGMVIVPIGYAAQELFDVSQ VR | 106 | 49 | 22 | 116.24 | b2b4b7b11b12b14y2y3y4y5y6y7°y7y8*y8y9*y9y10*y10y12°y12y49 | 5134.57 | 115.779 | 16647  | 4 | 1284.40 | 2.95   |
| Q8ZQ40 WRBA_SALTY Flavoprotein wrbA              | 3  |                       | FGNMSGQMR                                           | 79  | 9  | 8  | 45.47  | b2b3°b3y2y4y5y6y9                                         | 1027.46 | 37.173  | 11113  | 2 | 514.23  | 12.59  |
| Q8ZQ40 WRBA_SALTY Flavoprotein wrbA              | 4  |                       | VPETMPPEIFAK                                        | 38  | 12 | 4  | 35.5   | b5b6°b6b7                                                 | 1358.70 | 47.003  | 9923   | 2 | 679.85  | -2.96  |
| Q8ZQ40 WRBA_SALTY Flavoprotein wrbA              | 5  |                       | TFLDQTGGLWASGSLYGK                                  | 88  | 18 | 5  | 24.82  | b5°b5y3y7y10                                              | 1900.95 | 71.907  | 9751   | 3 | 634.32  | 0.96   |
| Q8ZQ40 WRBA_SALTY Flavoprotein wrbA              | 6  |                       | GGTPYGATTIAGGDGSR                                   | 155 | 17 | 5  | 34.01  | b5b6b14y6y10                                              | 1537.72 | 39.573  | 2755   | 2 | 769.37  | -0.40  |

|                                                                 |    |                       |                                     |     |    |    |       |                             |         |         |        |   |         |        |
|-----------------------------------------------------------------|----|-----------------------|-------------------------------------|-----|----|----|-------|-----------------------------|---------|---------|--------|---|---------|--------|
| Q8ZQ40 WRBA_SALTY Flavoprotein wrbA                             | 7  |                       | GGTPYGATTIAGGDGSRQPSQEEL SIAR       | 155 | 28 | 4  | 22.33 | b14y3y8y9                   | 2776.31 | 136.440 | 2597   | 2 | 1388.66 | -12.49 |
| Q8ZQ40 WRBA_SALTY Flavoprotein wrbA                             | 8  |                       | TQNAPVATPQELADYDAI                  | 54  | 18 | 0  | 8.08  |                             | 1916.93 | 89.177  | 4046   | 3 | 639.65  | 2.23   |
| Q7CPZ4 GRPE_SALTY Protein grpE                                  | 1  |                       | FVNELLPVIDSLDR                      | 90  | 14 | 5  | 33.02 | b4b6*b6y8y9                 | 1629.89 | 96.157  | 31142  | 2 | 815.45  | 1.35   |
| Q7CPZ4 GRPE_SALTY Protein grpE                                  | 2  |                       | IANLEVQLAEAQTR                      | 43  | 14 | 8  | 45.27 | b1b10b11y5°y5y10y12         | 1555.85 | 62.245  | 11793  | 2 | 778.43  | 6.83   |
| Q7CPZ4 GRPE_SALTY Protein grpE                                  | 3  |                       | TPEGQAPEEIIIMDQHEEVEAVEPN DSAEQVDPR | 7   | 33 | 6  | 17.82 | b10b15y3°y3y7y9             | 3688.66 | 101.864 | 8364   | 5 | 738.54  | 1.39   |
| Q7CPZ4 GRPE_SALTY Protein grpE                                  | 4  |                       | AAMVTVAK                            | 186 | 8  | 3  | 33.09 | b6y6y7                      | 790.43  | 31.194  | 6957   | 2 | 395.72  | -22.24 |
| Q7CPZ4 GRPE_SALTY Protein grpE                                  | 5  |                       | ALEVADKANPDMAAMVEGIELTL K           | 104 | 24 | 3  | 12.71 | b11b15y13                   | 2529.31 | 96.451  | 9535   | 3 | 843.78  | 7.43   |
| Q7CPZ4 GRPE_SALTY Protein grpE                                  | 6  |                       | IKAEMENLR                           | 64  | 9  | 5  | 44.96 | b6°b6b7y5y7                 | 1103.60 | 45.605  | 8263   | 2 | 552.30  | 10.40  |
| P16657 FABI_SALTY Enoyl-[acyl-carrier-protein] reductase [NADH] | 1  |                       | AIPNYNVMLAK                         | 151 | 12 | 7  | 34.25 | b7*b7b9*b9b10y3y12          | 1290.69 | 56.689  | 27863  | 2 | 645.85  | 3.78   |
| P16657 FABI_SALTY Enoyl-[acyl-carrier-protein] reductase [NADH] | 2  |                       | FDGFVHSIGFAPGDQLDGDYVNA VTR         | 84  | 26 | 8  | 32.61 | b2b3°b3b11b14y9y10y12       | 2797.34 | 81.615  | 14250  | 3 | 933.12  | 4.89   |
| P16657 FABI_SALTY Enoyl-[acyl-carrier-protein] reductase [NADH] | 3  |                       | VNAISAGPIR                          | 183 | 10 | 4  | 28.67 | b2b3y6y7                    | 997.57  | 43.084  | 12720  | 2 | 499.29  | -5.81  |
| P16657 FABI_SALTY Enoyl-[acyl-carrier-protein] reductase [NADH] | 4  |                       | LSIAYGIAQAMHR                       | 17  | 13 | 7  | 46.12 | b2°b2b13y3y4y7y8            | 1430.74 | 69.725  | 8321   | 3 | 477.59  | -8.79  |
| P16657 FABI_SALTY Enoyl-[acyl-carrier-protein] reductase [NADH] | 5  |                       | VAHDISSYSFVAMAK                     | 114 | 15 | 4  | 25.8  | b4b10y4y8                   | 1625.78 | 75.999  | 3743   | 2 | 813.39  | -12.84 |
| P16657 FABI_SALTY Enoyl-[acyl-carrier-protein] reductase [NADH] | 6  | Carbamidomethyl+C(5)  | MLAHCEAVTPIR                        | 205 | 12 | 4  | 22.28 | b4b11y10y12                 | 1397.69 | 65.317  | 1849   | 3 | 466.57  | -7.16  |
| P16657 FABI_SALTY Enoyl-[acyl-carrier-protein] reductase [NADH] | 7  |                       | YMANAMGPEGVR                        | 171 | 12 | 4  | 34.25 | b3b4b8y4                    | 1295.58 | 85.855  | 6183   | 2 | 648.29  | -3.86  |
| P16657 FABI_SALTY Enoyl-[acyl-carrier-protein] reductase [NADH] | 8  |                       | TMLNPGSALLTLSYLGAER                 | 132 | 19 | 7  | 35.11 | b8y4°y4y7°y7y9y15           | 2007.05 | 100.434 | 3256   | 3 | 669.69  | -5.41  |
| P16657 FABI_SALTY Enoyl-[acyl-carrier-protein] reductase [NADH] | 9  |                       | LSIAYGIAQAMHREGAELAFYQNDK           | 17  | 26 | 6  | 22.81 | b6b12°b12b13y8°y8           | 2897.45 | 106.224 | 98603  | 4 | 725.12  | 6.99   |
| P16657 FABI_SALTY Enoyl-[acyl-carrier-protein] reductase [NADH] | 10 |                       | EGFKVAHDISSYSFVAMAK                 | 110 | 19 | 6  | 23.66 | b8°b8b10b13°b13y13          | 2087.00 | 122.353 | 2096   | 2 | 1044.00 | -12.63 |
| P16657 FABI_SALTY Enoyl-[acyl-carrier-protein] reductase [NADH] | 11 | Carbamidomethyl+C(17) | VAHDISSYSFVAMAKACR                  | 114 | 18 | 4  | 15.58 | b8°b8b12y11                 | 2012.96 | 102.230 | 2041   | 2 | 1006.98 | -2.91  |
| P16657 FABI_SALTY Enoyl-[acyl-carrier-protein] reductase [NADH] | 12 | Oxidation+M(11)       | LSIAYGIAQAMHR                       | 17  | 13 | 3  | 25.41 | b9y7y8                      | 1446.74 | 42.123  | 4091   | 2 | 723.87  | -11.48 |
| P61179 RL22_SALTY 50S ribosomal protein L22                     | 1  |                       | IFVDEGPSMK                          | 73  | 10 | 8  | 51.89 | b2y5y7y8°y8y9°y9y10         | 1122.55 | 49.828  | 42066  | 2 | 561.78  | -3.48  |
| P61179 RL22_SALTY 50S ribosomal protein L22                     | 2  |                       | LVADLIR                             | 18  | 7  | 6  | 40.47 | b2b3y2y3y5y7                | 799.49  | 56.123  | 24714  | 2 | 400.25  | -11.15 |
| P61179 RL22_SALTY 50S ribosomal protein L22                     | 3  |                       | IFVDEGPSMKR                         | 73  | 11 | 3  | 36.07 | y7y8y9                      | 1278.66 | 43.596  | 8711   | 2 | 639.83  | 7.06   |
| P61179 RL22_SALTY 50S ribosomal protein L22                     | 4  |                       | VLESAIANAEHNDGADIDDLK               | 49  | 21 | 3  | 13.88 | b3y3y5                      | 2210.04 | 60.066  | 4407   | 3 | 737.35  | -9.61  |
| P61179 RL22_SALTY 50S ribosomal protein L22                     | 5  | Phosphoryl STY(5)     | TSHITVVVSDR                         | 99  | 11 | 4  | 24.31 | b3°b3b10y5                  | 1293.59 | 54.176  | 351514 | 2 | 647.30  | -14.53 |
| P61179 RL22_SALTY 50S ribosomal protein L22                     | 6  |                       | IFVDEGPSMKR                         | 73  | 11 | 1  | 7.86  | b8                          | 1260.64 | 43.543  | 5540   | 2 | 630.82  | 1.36   |
| Q7CPL4 RL16_SALTY 50S ribosomal protein L16                     | 1  |                       | VLYEMDGVPEELAR                      | 100 | 14 | 11 | 84.14 | b1b4b8y3y6y8y9y10y11°y11y14 | 1620.80 | 68.766  | 67886  | 2 | 810.91  | 6.10   |
| Q7CPL4 RL16_SALTY 50S ribosomal protein L16                     | 2  |                       | GNVEYWVALIQPGK                      | 86  | 14 | 7  | 24.73 | b2b4°b4b5y2y3y14            | 1573.83 | 86.373  | 9606   | 2 | 787.42  | -3.65  |
| Q7CPL4 RL16_SALTY 50S ribosomal protein L16                     | 3  |                       | TTFVTK                              | 127 | 6  | 1  | 13.62 | b5                          | 696.40  | 21.951  | 8430   | 1 | 696.40  | 9.82   |

|                                               |    |                       |                                     |     |    |    |       |                                 |         |         |       |   |         |        |
|-----------------------------------------------|----|-----------------------|-------------------------------------|-----|----|----|-------|---------------------------------|---------|---------|-------|---|---------|--------|
| Q7CPL4 RL16_SALTY 50S ribosomal protein L16   | 4  |                       | GNVEYWVALIQPGKVLVEMDGV PEELAR       | 86  | 28 | 11 | 54.19 | b5b8*b8b9y6°y6y8y9°y9y1y12      | 3175.58 | 89.010  | 2424  | 4 | 794.65  | -11.76 |
| P65882 PURA_SALTY Adenylosuccinate synthetase | 1  | Carbamidomethyl+C(7)  | LLLSEACPLILDYHVALDNAR               | 97  | 21 | 12 | 79.05 | b2b3b8b19y3y5y6y11y12*y12y14y19 | 2396.25 | 90.884  | 31172 | 3 | 799.42  | -4.79  |
| P65882 PURA_SALTY Adenylosuccinate synthetase | 2  |                       | GVEPIYETMPGWSESTFGVK                | 367 | 20 | 11 | 63.66 | b3b4°b4b7b8°b8b9b13y7°y7y13     | 2214.07 | 99.291  | 22470 | 2 | 1107.54 | 14.22  |
| P65882 PURA_SALTY Adenylosuccinate synthetase | 3  |                       | GNNVVVLGTQWGDEGK                    | 1   | 16 | 4  | 17.16 | b5*b5b10y6                      | 1672.82 | 81.131  | 14072 | 3 | 558.28  | -2.99  |
| P65882 PURA_SALTY Adenylosuccinate synthetase | 4  |                       | VLDDTMAVADILTSMVVDVSDLL DQAR        | 186 | 27 | 11 | 68.38 | b5b6b8b11y3y4y5y7y8°y8y27       | 2905.47 | 138.242 | 6350  | 3 | 969.16  | 4.20   |
| P65882 PURA_SALTY Adenylosuccinate synthetase | 5  |                       | EVMEYHNFQLVNYYK                     | 163 | 15 | 5  | 37.84 | b10*b10b11y9y10                 | 1976.94 | 83.542  | 3534  | 3 | 659.65  | 10.06  |
| P65882 PURA_SALTY Adenylosuccinate synthetase | 6  |                       | VGDLFDKETFAEK                       | 148 | 13 | 7  | 47.29 | b4b5b6°b6b10y2y5                | 1498.74 | 51.044  | 3451  | 3 | 500.25  | 0.33   |
| P65882 PURA_SALTY Adenylosuccinate synthetase | 7  |                       | GVEPIYETMPGWSESTFGVKDR              | 367 | 22 | 3  | 22.19 | b11b12y9                        | 2485.19 | 81.514  | 2350  | 2 | 1243.10 | 8.84   |
| P65882 PURA_SALTY Adenylosuccinate synthetase | 8  |                       | EVTTTPLAADDWK                       | 354 | 13 | 3  | 29.88 | b4b8b11                         | 1446.71 | 75.253  | 32850 | 2 | 723.86  | 2.62   |
| P65882 PURA_SALTY Adenylosuccinate synthetase | 9  |                       | IEELTGVPIDIISTGPDR                  | 402 | 18 | 6  | 26.58 | b7b8°b8b13y6°y6                 | 1924.99 | 86.906  | 19573 | 3 | 642.33  | -17.69 |
| P65882 PURA_SALTY Adenylosuccinate synthetase | 10 | Carbamidomethyl+C(19) | VGAGPFPTELFDETGEFLCK                | 273 | 20 | 4  | 14.37 | b13y5y10°y10                    | 2214.08 | 114.907 | 2195  | 4 | 554.28  | 18.42  |
| P65882 PURA_SALTY Adenylosuccinate synthetase | 11 | Carbamidomethyl+C(2)  | LCVAYR                              | 343 | 6  | 2  | 26.85 | b5y3                            | 781.40  | 41.676  | 2112  | 2 | 391.20  | -3.12  |
| P65882 PURA_SALTY Adenylosuccinate synthetase | 12 |                       | ETFAEK                              | 155 | 6  | 1  | 13.62 | y5                              | 724.34  | 98.433  | 1790  | 1 | 724.34  | -10.36 |
| P65882 PURA_SALTY Adenylosuccinate synthetase | 13 |                       | EVTTTPLAADDWKGVVEPIYETMP GWSESTFGVK | 354 | 33 | 4  | 24.43 | b4b5y6y11                       | 3641.76 | 92.404  | 6035  | 3 | 1214.59 | 7.31   |
| P65882 PURA_SALTY Adenylosuccinate synthetase | 14 |                       | GIGPAYEDKVAR                        | 132 | 12 | 4  | 22.28 | b3b9y10°y10                     | 1275.66 | 70.457  | 5195  | 2 | 638.33  | -5.84  |
| P65882 PURA_SALTY Adenylosuccinate synthetase | 15 | Carbamidomethyl+C(2)  | LCVAYRMPDGR                         | 343 | 11 | 3  | 24.31 | b4y4y10                         | 1337.66 | 61.640  | 4655  | 2 | 669.33  | 11.13  |
| P65882 PURA_SALTY Adenylosuccinate synthetase | 16 |                       | LKEVMEYHNFQLVNYYK                   | 161 | 17 | 4  | 22.93 | b10b12y6y9                      | 2218.13 | 46.872  | 2572  | 2 | 1109.57 | 14.64  |
| P65882 PURA_SALTY Adenylosuccinate synthetase | 17 |                       | YVVRYQGGHNAGHTLVINGEK               | 29  | 21 | 4  | 23.53 | b7b9b10°b10                     | 2312.18 | 99.879  | 1605  | 3 | 771.40  | -5.60  |
| P65882 PURA_SALTY Adenylosuccinate synthetase | 18 | Phosphoryl STY(14)    | ENVTSIIGNGVVLSPSALMK                | 62  | 20 | 4  | 14.37 | b10°b10b14y5                    | 2109.05 | 102.107 | 3203  | 3 | 703.69  | -2.08  |
| P65882 PURA_SALTY Adenylosuccinate synthetase | 19 | Oxidation+M(19)       | ENVTSIIGNGVVLSPSALMKEMK             | 62  | 23 | 4  | 20.12 | b10y3y5y12                      | 2433.24 | 87.456  | 21008 | 2 | 1217.12 | -14.65 |
| P65882 PURA_SALTY Adenylosuccinate synthetase | 20 | Oxidation+M(1)        | MPDGREVTTTPLAADDWK                  | 349 | 18 | 5  | 24.82 | b10b14°b14b17y9                 | 2018.95 | 66.792  | 8402  | 3 | 673.66  | 1.33   |
| P65882 PURA_SALTY Adenylosuccinate synthetase | 21 | Oxidation+M(2)        | EMKELEDR                            | 82  | 8  | 6  | 67.31 | b3b4b6y3°y3y6                   | 1065.49 | 22.019  | 7967  | 2 | 533.25  | 1.49   |
| P65882 PURA_SALTY Adenylosuccinate synthetase | 22 | Oxidation+M(1)        | MGNNVVVLGTQWGDEGK                   | 0   | 17 | 3  | 16.32 | b6b9y4                          | 1819.86 | 58.906  | 5593  | 3 | 607.29  | -3.09  |
| P65882 PURA_SALTY Adenylosuccinate synthetase | 23 | Oxidation+M(15)       | VLDDTMAVADILTSMVVDVSDLL DQAR        | 186 | 27 | 3  | 22.76 | b4b7b8                          | 2921.49 | 122.076 | 5372  | 3 | 974.50  | 13.37  |
| Q8ZR01 RLPA_SALTY Rare lipoprotein A          | 1  |                       | LSQQFSVPGR                          | 329 | 10 | 7  | 71.8  | b4°b4b5b6y4y5y6                 | 1118.59 | 46.484  | 15710 | 2 | 559.80  | -0.44  |
| Q8ZR01 RLPA_SALTY Rare lipoprotein A          | 2  |                       | LQTEAQLQSFIASAQ                     | 366 | 15 | 6  | 14.92 | b3°b3°b3b9°b9b10°               | 1634.84 | 64.289  | 2910  | 2 | 817.93  | 2.69   |
| Q8ZR01 RLPA_SALTY Rare lipoprotein A          | 3  |                       | YEPLNPTANQDYQR                      | 51  | 14 | 4  | 27.86 | y4y6y9*y9                       | 1708.80 | 45.781  | 3594  | 2 | 854.90  | 5.57   |
| Q8ZR01 RLPA_SALTY Rare lipoprotein A          | 4  |                       | INDRGPYGTDR                         | 135 | 11 | 3  | 31.29 | b5b9b10                         | 1263.61 | 41.993  | 17909 | 2 | 632.31  | 4.06   |
| Q8ZR01 RLPA_SALTY Rare lipoprotein A          | 5  |                       | AAADRLNTSNNTK                       | 152 | 13 | 3  | 20.64 | b8b12y11                        | 1375.67 | 77.758  | 5688  | 2 | 688.34  | -14.64 |

|                                              |    |                       |                                        |     |    |    |       |                                                  |         |         |        |   |         |        |
|----------------------------------------------|----|-----------------------|----------------------------------------|-----|----|----|-------|--------------------------------------------------|---------|---------|--------|---|---------|--------|
| [P0A2F4 SODF_SALTY Superoxide dismutase [Fe] | 1  |                       | SFELPALPYAK                            | 1   | 11 | 4  | 24.31 | b3y2y4y7                                         | 1235.67 | 78.192  | 56553  | 2 | 618.34  | -0.69  |
| [P0A2F4 SODF_SALTY Superoxide dismutase [Fe] | 2  |                       | SLEEIVR                                | 51  | 7  | 6  | 50.68 | b3°b3y4y5y6y7                                    | 845.47  | 47.239  | 25982  | 2 | 423.24  | -9.02  |
| [P0A2F4 SODF_SALTY Superoxide dismutase [Fe] | 3  | Carbamidomethyl+C(22) | TSEGGIFNNAAQVWNHTFYWNCL<br>APNAGGEPTGK | 58  | 34 | 14 | 29.38 | b2°b2b10°b10*b10y2y4y7°<br>y7y9y10y13*y13y34     | 3708.72 | 95.551  | 24190  | 3 | 1236.91 | 6.58   |
| [P0A2F4 SODF_SALTY Superoxide dismutase [Fe] | 4  |                       | NARPNYLEHFWALVNWEFVAK                  | 168 | 21 | 10 | 36.24 | b2b3b4*b4b6b14y1y8y15y<br>21                     | 2604.30 | 103.770 | 14116  | 3 | 868.77  | -4.59  |
| [P0A2F4 SODF_SALTY Superoxide dismutase [Fe] | 5  |                       | DALAPHISAETLEYHYGK                     | 12  | 18 | 3  | 22.98 | b3b4y7                                           | 2014.96 | 86.797  | 17893  | 2 | 1007.99 | -11.63 |
| [P0A2F4 SODF_SALTY Superoxide dismutase [Fe] | 6  |                       | LADAIAASFGSFAEFK                       | 92  | 16 | 3  | 17.16 | b11b14y11                                        | 1644.85 | 64.884  | 17809  | 2 | 822.93  | 16.92  |
| [P0A2F4 SODF_SALTY Superoxide dismutase [Fe] | 7  |                       | HHQTYVTNLNLIKGTAFEGK                   | 30  | 21 | 3  | 13.88 | b5y3y7                                           | 2385.20 | 85.775  | 10235  | 3 | 795.74  | -14.13 |
| [P0A2F4 SODF_SALTY Superoxide dismutase [Fe] | 8  |                       | SFELPALPYAKDALAPHISAETLEY<br>HYGK      | 1   | 29 | 6  | 14.52 | b6°b6b26y6y12°y12                                | 3231.64 | 93.932  | 3782   | 4 | 808.66  | 0.23   |
| [P0A2F4 SODF_SALTY Superoxide dismutase [Fe] | 9  |                       | GTAFEGKSLEEIVR                         | 44  | 14 | 3  | 27.86 | b4b7b11                                          | 1535.83 | 90.665  | 2172   | 3 | 512.61  | 13.59  |
| [P60726 RL4_SALTY 50S ribosomal protein L4   | 1  |                       | DATGIDPVSLIAFDK                        | 170 | 15 | 7  | 25.8  | b2b3b5y1y3y10y15                                 | 1561.82 | 87.344  | 31439  | 2 | 781.41  | 5.55   |
| [P60726 RL4_SALTY 50S ribosomal protein L4   | 2  |                       | VVMTADAVK                              | 185 | 9  | 6  | 54.5  | b2y4y5°y5y6y7                                    | 933.50  | 35.571  | 26562  | 2 | 467.26  | -3.07  |
| [P60726 RL4_SALTY 50S ribosomal protein L4   | 3  |                       | DFNEALVHQVVVAYAAGAR                    | 21  | 19 | 5  | 31.63 | b7b11y4y6y7                                      | 2030.04 | 82.726  | 21466  | 3 | 677.35  | -2.04  |
| [P60726 RL4_SALTY 50S ribosomal protein L4   | 4  |                       | QVEEMLA                                | 194 | 7  | 6  | 40.47 | b4°b4b6*b6y5y7                                   | 819.39  | 50.367  | 17622  | 1 | 819.39  | -4.25  |
| [P60726 RL4_SALTY 50S ribosomal protein L4   | 5  |                       | SGGVTFARPQDHSQK                        | 79  | 16 | 4  | 30.8  | b3b8y10y11                                       | 1685.81 | 59.359  | 25708  | 3 | 562.61  | -12.89 |
| [P60726 RL4_SALTY 50S ribosomal protein L4   | 6  |                       | MELVLK                                 | 0   | 6  | 2  | 26.85 | b3y4                                             | 732.43  | 54.151  | 9201   | 2 | 366.72  | -9.75  |
| [P60726 RL4_SALTY 50S ribosomal protein L4   | 7  |                       | SGGVTFARPQDHSQKVNK                     | 79  | 19 | 3  | 14.94 | b3b6y11                                          | 2027.02 | 135.287 | 116020 | 2 | 1014.01 | -11.20 |
| [P60726 RL4_SALTY 50S ribosomal protein L4   | 8  |                       | DATGIDPVSLIAFDKVVMTADAV<br>K           | 170 | 24 | 8  | 42.2  | b3°b3b4°b4y3y6y7y19                              | 2476.31 | 101.316 | 32753  | 3 | 826.11  | 4.54   |
| [P60726 RL4_SALTY 50S ribosomal protein L4   | 9  |                       | SPIWRSGGVTFARPQDHSQK                   | 74  | 21 | 4  | 18.93 | b7b10y4y13                                       | 2325.20 | 56.721  | 3831   | 2 | 1163.10 | 4.62   |
| [P60726 RL4_SALTY 50S ribosomal protein L4   | 10 |                       | MELVLKDAQSALTVSETTFGR                  | 0   | 21 | 3  | 13.88 | b7y9y12                                          | 2296.16 | 99.265  | 1688   | 2 | 1148.58 | -12.23 |
| [P60726 RL4_SALTY 50S ribosomal protein L4   | 11 | Phosphoryl STY(13)    | VDVRDATGIDPVSLIAFDK                    | 166 | 19 | 5  | 20.7  | b7°b7b11y5y13                                    | 2111.06 | 47.298  | 2425   | 3 | 704.36  | 13.76  |
| [P66541 RS2_SALTY 30S ribosomal protein S2   | 1  |                       | TVPMFNEALAEUNK                         | 45  | 14 | 8  | 19.29 | b1b2b8*b8b10y12°y12*y1<br>2                      | 1576.81 | 83.609  | 79523  | 2 | 788.91  | 5.03   |
| [P66541 RS2_SALTY 30S ribosomal protein S2   | 2  |                       | WLGGMMLTNWK                            | 95  | 10 | 6  | 28.67 | b1b6y7y8°y8y10                                   | 1205.61 | 84.626  | 52528  | 2 | 603.31  | -3.95  |
| [P66541 RS2_SALTY 30S ribosomal protein S2   | 3  |                       | EANNLGIPVFAIVDNTSDPDGVDF<br>VIPGNDDAIR | 174 | 34 | 17 | 65.97 | b5b7°b7°b7b8°b8b15°b15<br>y1y4y6y7y8y11y14y16y34 | 3569.76 | 103.815 | 24160  | 3 | 1190.59 | 6.09   |
| [P66541 RS2_SALTY 30S ribosomal protein S2   | 4  |                       | LENSLGGIKDMGGLPDALFVIDAD<br>HEHIAIK    | 143 | 31 | 3  | 22.04 | b3b4y13                                          | 3288.70 | 100.188 | 1572   | 3 | 1096.90 | 0.59   |
| [P66541 RS2_SALTY 30S ribosomal protein S2   | 5  |                       | DMGGLPDALFVIDADHEHIAIK                 | 152 | 22 | 4  | 37.15 | b6b10b11b12                                      | 2377.15 | 98.068  | 181754 | 2 | 1189.08 | -13.76 |
| [P66541 RS2_SALTY 30S ribosomal protein S2   | 6  |                       | AGVHFHGQTR                             | 11  | 10 | 6  | 40.13 | b8y3°y3y4y8*y8                                   | 1109.58 | 55.322  | 10593  | 2 | 555.30  | 22.11  |
| [P66541 RS2_SALTY 30S ribosomal protein S2   | 7  | Carbamidomethyl+C(6)  | EAANSCDQFFVNHR                         | 81  | 14 | 4  | 24.73 | b4y8°y8y9                                        | 1694.77 | 65.677  | 10556  | 3 | 565.60  | 21.97  |
| [P66541 RS2_SALTY 30S ribosomal protein S2   | 8  |                       | SQDLASQAEEESFVEAE                      | 225 | 16 | 4  | 17.16 | b8°b8y10y12                                      | 1739.78 | 72.249  | 9846   | 2 | 870.39  | 9.61   |

|                                                   |    |                      |                                 |     |    |    |       |                                |         |         |       |   |         |        |
|---------------------------------------------------|----|----------------------|---------------------------------|-----|----|----|-------|--------------------------------|---------|---------|-------|---|---------|--------|
| P66541 RS2_SALTY 30S ribosomal protein S2         | 9  |                      | LENSLGGIK                       | 143 | 9  | 3  | 30.49 | b4b8y3                         | 930.51  | 65.242  | 1641  | 2 | 465.76  | -17.12 |
| P66541 RS2_SALTY 30S ribosomal protein S2         | 10 | Carbamidomethyl+C(6) | EAANSCDQFFVNHRWLGGMLTNWK        | 81  | 24 | 3  | 12.71 | b5y7y9                         | 2881.35 | 93.034  | 7179  | 3 | 961.12  | 5.85   |
| P66541 RS2_SALTY 30S ribosomal protein S2         | 11 | Oxidation+M(11)      | LENSLGGIKDMGGLPDALFVIDADHEHIAIK | 143 | 31 | 4  | 11.25 | b7°b7b10y12                    | 3304.69 | 102.170 | 30145 | 4 | 826.93  | 0.81   |
| P0A2E1 GLYA_SALTY Serine hydroxymethyltransferase | 1  |                      | SPFVTSGIR                       | 354 | 9  | 6  | 54.5  | b1y3y5y6y7y9                   | 963.52  | 47.886  | 58407 | 2 | 482.26  | -3.74  |
| P0A2E1 GLYA_SALTY Serine hydroxymethyltransferase | 2  |                      | LNSAVFPSAQGGPLMHVIAGK           | 251 | 21 | 7  | 45.55 | b16y3y4y13y15y16y21            | 2094.11 | 77.409  | 58355 | 3 | 698.71  | -4.20  |
| P0A2E1 GLYA_SALTY Serine hydroxymethyltransferase | 3  |                      | VMQAQGSQTLNK                    | 42  | 12 | 12 | 83.91 | b2b3y2y3y4y7*y7y9y10*y10y11y12 | 1304.66 | 28.777  | 44391 | 2 | 652.83  | -1.50  |
| P0A2E1 GLYA_SALTY Serine hydroxymethyltransferase | 4  |                      | EMNIADYDAELWQAMEQEK             | 4   | 19 | 8  | 56.2  | y4y6y7y9y12*y12y13y19          | 2314.03 | 91.779  | 31888 | 2 | 1157.52 | 11.18  |
| P0A2E1 GLYA_SALTY Serine hydroxymethyltransferase | 5  | Carbamidomethyl+C(7) | ELAGWMCDVLDNINDEATIER           | 380 | 21 | 9  | 45.55 | b5°b5y4y5y8y11y12°y12y21       | 2464.14 | 100.757 | 28610 | 2 | 1232.58 | 12.58  |
| P0A2E1 GLYA_SALTY Serine hydroxymethyltransferase | 6  |                      | AVALKEAMEPEFK                   | 272 | 13 | 8  | 43.1  | b3b9b11y1y4°y4y9y13            | 1462.75 | 58.363  | 27506 | 2 | 731.88  | -6.18  |
| P0A2E1 GLYA_SALTY Serine hydroxymethyltransferase | 7  |                      | YAEGYPGKR                       | 54  | 9  | 4  | 38.27 | y4y6y7y9                       | 1040.51 | 22.795  | 12485 | 2 | 520.76  | -6.10  |
| P0A2E1 GLYA_SALTY Serine hydroxymethyltransferase | 8  |                      | MIIGGFSAYSGVVDWAK               | 168 | 17 | 4  | 23.72 | b2y8y12y15                     | 1800.88 | 102.107 | 4477  | 3 | 600.97  | -8.54  |
| P0A2E1 GLYA_SALTY Serine hydroxymethyltransferase | 9  | Carbamidomethyl+C(5) | VLDICAR                         | 405 | 7  | 3  | 40.47 | y4y5y6                         | 846.44  | 43.431  | 30326 | 2 | 423.72  | -12.33 |
| P0A2E1 GLYA_SALTY Serine hydroxymethyltransferase | 10 |                      | LYNIVPYGIDESGK                  | 138 | 14 | 5  | 27.58 | b3b8y4°y4y7                    | 1567.81 | 72.922  | 12036 | 2 | 784.41  | 7.24   |
| P0A2E1 GLYA_SALTY Serine hydroxymethyltransferase | 11 |                      | QEEHIELIASENYTSR                | 25  | 17 | 7  | 48.2  | b6b8b9b10y10y14°y14            | 2016.00 | 96.489  | 2386  | 2 | 1008.50 | 15.74  |
| P0A2E1 GLYA_SALTY Serine hydroxymethyltransferase | 12 | Carbamidomethyl+C(5) | YYGGCEYVDVVEQLAIDR              | 63  | 18 | 3  | 22.98 | b4y10y11                       | 2149.03 | 90.675  | 1932  | 2 | 1075.02 | 17.15  |
| P0A2E1 GLYA_SALTY Serine hydroxymethyltransferase | 13 |                      | YAEGYPGK                        | 54  | 8  | 4  | 33.09 | b6°b6y6y7                      | 884.40  | 25.876  | 1772  | 2 | 442.70  | -22.43 |
| P0A2E1 GLYA_SALTY Serine hydroxymethyltransferase | 14 |                      | GYKVVSGGTENHLFLDLVDK            | 305 | 21 | 4  | 13.88 | b10°b10y11y15                  | 2304.21 | 100.561 | 69181 | 2 | 1152.61 | -3.92  |
| P0A2E1 GLYA_SALTY Serine hydroxymethyltransferase | 15 |                      | LYNIVPYGIDESGKIDYDEMAK          | 138 | 22 | 6  | 44.55 | b3y4y11y17y18y19               | 2533.22 | 75.558  | 51944 | 3 | 845.08  | 1.54   |
| P0A2E1 GLYA_SALTY Serine hydroxymethyltransferase | 16 |                      | QEEHIELIASENYTSRPMQAQGSQTLNK    | 25  | 29 | 5  | 38.35 | b11b17y11y12y13                | 3301.63 | 83.442  | 38128 | 4 | 826.16  | 6.66   |
| P0A2E1 GLYA_SALTY Serine hydroxymethyltransferase | 17 |                      | NSVPNDPKSPFVTSGIR               | 346 | 17 | 4  | 16.32 | b3°b3b12y8                     | 1814.92 | 51.099  | 20956 | 3 | 605.65  | -9.08  |
| P0A2E1 GLYA_SALTY Serine hydroxymethyltransferase | 18 |                      | VMQAQGSQTLNKYAEGYPGK            | 42  | 20 | 4  | 36.02 | b10b11y6y7                     | 2170.06 | 66.597  | 16537 | 4 | 543.27  | 1.80   |
| P0A2E1 GLYA_SALTY Serine hydroxymethyltransferase | 19 |                      | EHKPKMIIGGFSAYSGVVDWAK          | 163 | 22 | 6  | 25.6  | b3b6°b6y9y11y14                | 2420.24 | 103.871 | 6942  | 4 | 605.82  | 0.61   |
| P0A2E1 GLYA_SALTY Serine hydroxymethyltransferase | 20 |                      | EADAALGRANITVNK                 | 331 | 15 | 3  | 18.14 | b7b13y4                        | 1542.80 | 69.547  | 1771  | 2 | 771.90  | -14.32 |
| P0A2E1 GLYA_SALTY Serine hydroxymethyltransferase | 21 |                      | MIIGGFSAYSGVVDWAKMR             | 168 | 19 | 5  | 31.63 | b7b12y6y8y9                    | 2088.06 | 99.429  | 1637  | 2 | 1044.53 | 9.94   |
| P0A2E1 GLYA_SALTY Serine hydroxymethyltransferase | 22 | Oxidation+M(1)       | MIIGGFSAYSGVVDWAK               | 168 | 17 | 4  | 22.93 | b5b8y3y6                       | 1816.90 | 65.306  | 7960  | 3 | 606.30  | 3.09   |
| P0A2E1 GLYA_SALTY Serine hydroxymethyltransferase | 23 | Oxidation+M(8)       | AVALKEAMEPEFK                   | 272 | 13 | 3  | 20.64 | b4y6y12                        | 1478.76 | 70.815  | 5123  | 2 | 739.88  | 3.22   |
| Q7CPD8 YIFE_SALTY UPF0438 protein yifE            | 1  |                      | AESFTTTNR                       | 1   | 9  | 9  | 45.47 | b2b4y2y5y6°y6y7°y7y9           | 1026.48 | 26.520  | 23557 | 2 | 513.74  | -5.23  |
| Q7CPD8 YIFE_SALTY UPF0438 protein yifE            | 2  |                      | HGHAFNDLDLGK                    | 37  | 12 | 4  | 22.28 | b3b12y4y7                      | 1323.66 | 54.145  | 14230 | 2 | 662.34  | 14.76  |
| Q7CPD8 YIFE_SALTY UPF0438 protein yifE            | 3  |                      | MAESFTTTNR                      | 0   | 10 | 5  | 26.91 | b8y5°y5*y5y9                   | 1157.55 | 96.433  | 9773  | 2 | 579.28  | 22.25  |



|                                                      |   |                       |                           |     |    |    |        |                                                |         |         |       |   |         |        |
|------------------------------------------------------|---|-----------------------|---------------------------|-----|----|----|--------|------------------------------------------------|---------|---------|-------|---|---------|--------|
| Q7CPD8 YIFE_SALTY UPF0438 protein yifE               | 4 |                       | EPVTD AER                 | 68  | 8  | 3  | 33.09  | b3y4y5                                         | 916.43  | 43.560  | 5677  | 2 | 458.72  | -6.06  |
| Q7CPD8 YIFE_SALTY UPF0438 protein yifE               | 5 |                       | FHTLSGGKPKVEGAEDYTEADD    | 90  | 22 | 6  | 28.96  | b4b8y4y5°y5y14                                 | 2366.05 | 60.889  | 5548  | 3 | 789.35  | 2.58   |
| Q7CPD8 YIFE_SALTY UPF0438 protein yifE               | 6 | Carbamidomethyl+C(14) | EPVTEEEKLFVAVCR           | 50  | 15 | 3  | 18.14  | b3y4y6                                         | 1805.88 | 61.574  | 5574  | 2 | 903.45  | -14.80 |
| Q7CPD8 YIFE_SALTY UPF0438 protein yifE               | 7 |                       | HGHAFNDLDLGKR             | 37  | 13 | 7  | 54.56  | b3b8°b8y3y4y7y9                                | 1479.73 | 35.419  | 2765  | 3 | 493.91  | -10.56 |
| Q7CPD8 YIFE_SALTY UPF0438 protein yifE               | 8 |                       | GFSRHGDFTIK               | 19  | 11 | 3  | 31.29  | y5y6y8                                         | 1264.63 | 54.198  | 1635  | 3 | 422.21  | -14.19 |
| P02936 OMPA_SALTY Outer membrane protein A           | 1 | Carbamidomethyl+C(13) | GMGESNPVTGNTCDNVKPR       | 302 | 19 | 17 | 109.61 | b3b7y1y2y3y5y7y8y10*y10y11°y11y12y13°y13y14y19 | 2032.91 | 36.491  | 73150 | 3 | 678.31  | -5.94  |
| P02936 OMPA_SALTY Outer membrane protein A           | 2 |                       | IGSDAYNQGLSEKR            | 267 | 14 | 8  | 52.42  | b5y1y6y7y8*y8y9y14                             | 1537.74 | 33.335  | 33236 | 3 | 513.25  | -12.22 |
| P02936 OMPA_SALTY Outer membrane protein A           | 3 |                       | LGYPITDDLDVYTR            | 103 | 14 | 5  | 31.54  | b10y4y9y11y14                                  | 1640.83 | 75.165  | 16399 | 2 | 820.92  | 7.07   |
| P02936 OMPA_SALTY Outer membrane protein A           | 4 | Carbamidomethyl+C(6)  | AALIDCLAPDR               | 321 | 11 | 5  | 36.07  | b2y3y8°y8y10                                   | 1214.62 | 68.075  | 11828 | 2 | 607.81  | 0.20   |
| P02936 OMPA_SALTY Outer membrane protein A           | 5 |                       | STLKPEGQQALDQLYSQSLNDPK   | 231 | 24 | 6  | 12.71  | b1b6b8y1y9y24                                  | 2673.33 | 81.200  | 7947  | 3 | 891.78  | -14.52 |
| P02936 OMPA_SALTY Outer membrane protein A           | 6 |                       | FGQQEAAPVVAPAPAPAEVQTK    | 194 | 23 | 7  | 33.91  | b3b6y6°y6y8y10y12                              | 2303.25 | 52.828  | 9879  | 2 | 1152.13 | 20.14  |
| P02936 OMPA_SALTY Outer membrane protein A           | 7 |                       | GDNINGAYK                 | 85  | 9  | 5  | 64.71  | b3b5b6b8y3                                     | 951.47  | 68.129  | 3236  | 2 | 476.24  | 19.24  |
| P02936 OMPA_SALTY Outer membrane protein A           | 8 |                       | DGSVVVLGFTDRIGSDAYNQGLSEK | 255 | 25 | 5  | 23.1   | b5y7y8°y8y15                                   | 2627.27 | 82.680  | 12218 | 3 | 876.43  | -7.81  |
| P02936 OMPA_SALTY Outer membrane protein A           | 9 | Carbamidomethyl+C(17) | ISARGMGESNPVTGNTCDNVKPR   | 298 | 23 | 3  | 13.05  | b4b8y4                                         | 2460.19 | 68.887  | 4017  | 3 | 820.74  | 9.33   |
| P0A2F6 SSB_SALTY Single-stranded DNA-binding protein | 1 |                       | VILVGNLQGDPEVR            | 8   | 14 | 12 | 68.7   | b3b6y1y2y4y5y8y9°y9y10°y10y14                  | 1508.84 | 64.734  | 26227 | 2 | 754.93  | 0.16   |
| P0A2F6 SSB_SALTY Single-stranded DNA-binding protein | 2 |                       | YTTEINVPQIGGVMQMLGGR      | 97  | 20 | 9  | 28.01  | b2b7°b7b10y10y13*y13y15y20                     | 2164.11 | 95.804  | 22588 | 2 | 1082.56 | 10.49  |
| P0A2F6 SSB_SALTY Single-stranded DNA-binding protein | 3 |                       | GSQVYIEGQLR               | 74  | 11 | 8  | 41.5   | b4b7b10*b10y2y6*y6y11                          | 1249.66 | 79.131  | 15216 | 2 | 625.33  | 1.47   |
| P0A2F6 SSB_SALTY Single-stranded DNA-binding protein | 4 |                       | YMPSGGAVANLTLATSESWR      | 22  | 20 | 4  | 30.75  | y5y11y12y15                                    | 2111.02 | 103.996 | 1658  | 2 | 1056.01 | -3.47  |
| P0A2F6 SSB_SALTY Single-stranded DNA-binding protein | 5 |                       | QTGEMK                    | 44  | 6  | 1  | 13.62  | y3                                             | 693.33  | 48.121  | 11122 | 1 | 693.33  | 13.56  |
| P0A2F6 SSB_SALTY Single-stranded DNA-binding protein | 6 |                       | WTDQSGQER                 | 88  | 9  | 5  | 30.49  | b3°b3y5°y5y8                                   | 1106.50 | 39.716  | 3225  | 2 | 553.75  | 12.80  |
| P0A2F6 SSB_SALTY Single-stranded DNA-binding protein | 7 | Oxidation+M(2)        | YMPSGGAVANLTLATSESWR      | 22  | 20 | 4  | 25.25  | b14y13y14y17                                   | 2127.05 | 96.215  | 11568 | 2 | 1064.03 | 13.31  |
| P0A2F6 SSB_SALTY Single-stranded DNA-binding protein | 8 | Oxidation+M(16)       | YTTEINVPQIGGVMQMLGGR      | 97  | 20 | 5  | 19.76  | b6°b6b13y5y18                                  | 2180.10 | 78.344  | 4452  | 3 | 727.37  | 8.96   |
| P0A2F6 SSB_SALTY Single-stranded DNA-binding protein | 9 |                       | GGVMQMLGGR                | 107 | 10 | 0  | 6.06   |                                                | 1005.49 | 95.835  | 1787  | 1 | 1005.49 | -4.92  |
| O68926 BFR_SALTY Bacterioferritin                    | 1 |                       | ILFLEGIPNLQDLGK           | 61  | 15 | 8  | 43.12  | b2b3b4y3y6y8*y8y15                             | 1669.95 | 100.008 | 9840  | 2 | 835.48  | -1.17  |
| O68926 BFR_SALTY Bacterioferritin                    | 2 |                       | DLREAIAYADSVHDYVSR        | 99  | 18 | 6  | 21.75  | b5°b5b7y5y11y18                                | 2080.02 | 74.390  | 7703  | 2 | 1040.51 | 2.82   |
| O68926 BFR_SALTY Bacterioferritin                    | 3 |                       | LGIGEDVEEMLR              | 76  | 12 | 7  | 34.25  | b1b11b12y2y6y7y9                               | 1360.68 | 81.687  | 6418  | 2 | 680.84  | 1.17   |
| O68926 BFR_SALTY Bacterioferritin                    | 4 |                       | LGMQNYLQSQIK              | 143 | 12 | 6  | 36.17  | b9°b9b11y10y11*y11                             | 1422.76 | 62.788  | 19250 | 2 | 711.89  | 15.87  |
| O68926 BFR_SALTY Bacterioferritin                    | 5 |                       | SDLRLELEGAK               | 88  | 11 | 4  | 24.31  | b5b10y5°y5                                     | 1230.68 | 38.850  | 9323  | 3 | 410.90  | 11.90  |
| O68926 BFR_SALTY Bacterioferritin                    | 6 |                       | DLREAIAYADSVHDYVSR        | 99  | 18 | 3  | 15.58  | b3b5y11                                        | 2080.03 | 81.955  | 5138  | 2 | 1040.52 | 10.80  |

|                                             |   |                       |                                     |     |    |    |       |                                                                        |         |         |       |   |         |        |
|---------------------------------------------|---|-----------------------|-------------------------------------|-----|----|----|-------|------------------------------------------------------------------------|---------|---------|-------|---|---------|--------|
| O68926 BFR_SALTY Bacterioferritin           | 7 |                       | YADSVHDYVSR                         | 106 | 11 | 1  | 7.34  | b3                                                                     | 1311.61 | 74.429  | 2048  | 2 | 656.31  | 6.51   |
| Q7CPP7 RL21_SALTY 50S ribosomal protein L21 | 1 |                       | MYAVFQSGGK                          | 0   | 10 | 12 | 91.55 | b2b3b5b8y4°y4y6y7y8°y8*y8y10                                           | 1087.52 | 51.061  | 48607 | 2 | 544.26  | -2.47  |
| Q7CPP7 RL21_SALTY 50S ribosomal protein L21 | 2 |                       | IGVPPFVDGGVIK                       | 48  | 12 | 5  | 32.49 | y2y5y7y9y12                                                            | 1200.69 | 75.920  | 41671 | 2 | 600.85  | -5.69  |
| Q7CPP7 RL21_SALTY 50S ribosomal protein L21 | 3 |                       | ITGISA                              | 97  | 6  | 1  | 13.62 | b3                                                                     | 561.32  | 46.181  | 12841 | 1 | 561.32  | -0.11  |
| Q7CPP7 RL21_SALTY 50S ribosomal protein L21 | 4 |                       | YAVFQSGGK                           | 1   | 9  | 5  | 44.96 | b5b7°b7y6y7                                                            | 956.46  | 89.105  | 9186  | 1 | 956.46  | -19.97 |
| Q7CPP7 RL21_SALTY 50S ribosomal protein L21 | 5 |                       | LDIATGETIEFAEVLMIANGEEVK            | 24  | 24 | 3  | 12.71 | b11b13y6                                                               | 2592.32 | 87.308  | 6414  | 3 | 864.78  | 4.80   |
| Q7CPP7 RL21_SALTY 50S ribosomal protein L21 | 6 |                       | YAVFQSGGKQHR                        | 1   | 12 | 3  | 26.26 | b11y9y10                                                               | 1377.72 | 71.694  | 9064  | 2 | 689.36  | 9.57   |
| Q7CPP7 RL21_SALTY 50S ribosomal protein L21 | 7 |                       | AEVVAHGRGEK                         | 60  | 11 | 4  | 41.5  | b3y5y6y7                                                               | 1152.61 | 13.555  | 3693  | 2 | 576.81  | -2.86  |
| Q7CPP7 RL21_SALTY 50S ribosomal protein L21 | 8 |                       | QQGHRQWFTDVK                        | 85  | 12 | 3  | 22.28 | b4b8y8                                                                 | 1529.75 | 33.370  | 1776  | 4 | 383.19  | -4.15  |
| Q7CPP7 RL21_SALTY 50S ribosomal protein L21 | 9 | Oxidation+M(16)       | LDIATGETIEFAEVLMIANGEEVK            | 24  | 24 | 10 | 55.67 | b10°b10b11°b11b12y4y6y7y12*y12                                         | 2608.34 | 75.329  | 80241 | 3 | 870.12  | 14.32  |
| P0A7V6 RS3_SALTY 30S ribosomal protein S3   | 1 |                       | LVADSITSQLER                        | 114 | 12 | 11 | 61.15 | b2b12y2y5°y5y6°y6y8y9y10y12                                            | 1331.72 | 59.408  | 62534 | 2 | 666.36  | -0.46  |
| P0A7V6 RS3_SALTY 30S ribosomal protein S3   | 2 |                       | ADIDYNTSEAHTTYGVIGVK                | 179 | 20 | 8  | 42.21 | b13y2y3y4y17°y17y18y20                                                 | 2154.04 | 55.175  | 37429 | 3 | 718.68  | 1.59   |
| P0A7V6 RS3_SALTY 30S ribosomal protein S3   | 3 |                       | LGIVKPWNSTWFANTK                    | 11  | 16 | 6  | 42.86 | y2y4y5y7y8y16                                                          | 1861.98 | 78.188  | 35847 | 3 | 621.33  | -7.28  |
| P0A7V6 RS3_SALTY 30S ribosomal protein S3   | 4 |                       | VVADIAGVPAQINIAEVR                  | 89  | 18 | 4  | 15.58 | b8y1y5y10                                                              | 1835.03 | 75.837  | 25393 | 2 | 918.02  | -6.72  |
| P0A7V6 RS3_SALTY 30S ribosomal protein S3   | 5 |                       | GEILGGMAAVEQPEKPAAQPKK              | 204 | 22 | 4  | 29.37 | b3b10b11b14                                                            | 2249.18 | 109.585 | 2463  | 2 | 1125.10 | -4.88  |
| P0A7V6 RS3_SALTY 30S ribosomal protein S3   | 6 |                       | LGIVKPWNSTWFANTK                    | 11  | 16 | 0  | 4.45  |                                                                        | 1843.97 | 78.188  | 6533  | 2 | 922.49  | -3.24  |
| P0A7X0 RS8_SALTY 30S ribosomal protein S8   | 1 |                       | SMQDPIADMLTR                        | 1   | 12 | 14 | 79.81 | b2b3b4b12y1y2y3y4y6°y9y10y11*y11y12                                    | 1377.65 | 77.247  | 96986 | 2 | 689.33  | 1.33   |
| P0A7X0 RS8_SALTY 30S ribosomal protein S8   | 2 |                       | AVVESIQR                            | 69  | 8  | 8  | 49.32 | b2b5y1y4*y4y5y6y8                                                      | 901.50  | 31.702  | 62650 | 2 | 451.25  | -11.37 |
| P0A7X0 RS8_SALTY 30S ribosomal protein S8   | 3 |                       | AAVTMPSSK                           | 22  | 9  | 7  | 57.51 | y2y3y4°y4y6y7y9                                                        | 891.46  | 30.354  | 56584 | 2 | 446.23  | 2.05   |
| P0A7X0 RS8_SALTY 30S ribosomal protein S8   | 4 |                       | VEGDTKPELELTlk                      | 50  | 14 | 3  | 27.07 | b3b4b13                                                                | 1571.86 | 68.151  | 8348  | 2 | 786.43  | 5.44   |
| P0A7X0 RS8_SALTY 30S ribosomal protein S8   | 5 |                       | VEGDTKPELELTlkyFQGK                 | 50  | 19 | 4  | 22.72 | b7b8y5*y5                                                              | 2195.14 | 102.652 | 19430 | 3 | 732.39  | -7.12  |
| P0A7X0 RS8_SALTY 30S ribosomal protein S8   | 6 | Carbamidomethyl+C(13) | AARQAQLGGEIICYVA                    | 114 | 16 | 4  | 17.16 | b10°b10y5y14                                                           | 1648.87 | 102.157 | 1546  | 3 | 550.29  | 11.70  |
| P0A7X0 RS8_SALTY 30S ribosomal protein S8   | 7 |                       | VTMPSSK                             | 24  | 7  | 1  | 8.82  | b4                                                                     | 749.38  | 30.306  | 9918  | 1 | 749.38  | -7.25  |
| O68883 CISY_SALTY Citrate synthase          | 1 | Carbamidomethyl+C(12) | TAGSSGANPFACIAAGIASLWGPAHGGANEAAALK | 240 | 34 | 26 | 92.32 | b1°b1b2b4°b4b6b7°b7b8°b8°b8b9y1y2y3y9*y9y12*y12y13*y13y14y26y27y34*y34 | 3195.58 | 115.675 | 45028 | 3 | 1065.87 | 5.73   |
| O68883 CISY_SALTY Citrate synthase          | 2 |                       | YSIGQPFVYPR                         | 178 | 11 | 4  | 36.07 | y3y6y8y11                                                              | 1326.69 | 67.584  | 32829 | 2 | 663.85  | 2.21   |
| O68883 CISY_SALTY Citrate synthase          | 3 | Carbamidomethyl+C(18) | NDLSYAGNFLNMMFSTPCETYEVNPVLER       | 189 | 29 | 12 | 64.2  | b2b3b4y2y3y5y6y11y12°y12y13y29                                         | 3411.55 | 110.904 | 13954 | 3 | 1137.85 | 3.58   |
| O68883 CISY_SALTY Citrate synthase          | 4 |                       | AMGIPSSMFTVIFAMAR                   | 371 | 17 | 4  | 22.93 | b5b11y5y13                                                             | 1829.92 | 119.171 | 10753 | 2 | 915.47  | 6.40   |
| O68883 CISY_SALTY Citrate synthase          | 5 | Carbamidomethyl+C(10) | RDSHPMAVMCGITGALAAFYHDSL DVNNPR     | 126 | 30 | 5  | 14.17 | b5b16y10y13°y13                                                        | 3315.54 | 94.918  | 7952  | 5 | 663.91  | -1.47  |

|                                                     |    |                       |                                       |     |    |    |       |                                          |         |         |       |   |         |        |
|-----------------------------------------------------|----|-----------------------|---------------------------------------|-----|----|----|-------|------------------------------------------|---------|---------|-------|---|---------|--------|
| O68883 CISY_SALTY Citrate synthase                  | 6  | Carbamidomethyl+C(15) | GVFTFDPGFTSTASCESK                    | 38  | 18 | 3  | 15.58 | b3b10y11                                 | 1937.89 | 73.093  | 3274  | 3 | 646.63  | 14.36  |
| O68883 CISY_SALTY Citrate synthase                  | 7  |                       | ILILHADHEQNASTSTVR                    | 222 | 18 | 3  | 13.5  | y4y8*y12                                 | 2005.07 | 43.682  | 1667  | 2 | 1003.04 | 11.20  |
| O68883 CISY_SALTY Citrate synthase                  | 8  |                       | HTMIHEQITR                            | 110 | 10 | 4  | 28.67 | b4*b4b5y5                                | 1265.63 | 21.995  | 47086 | 3 | 422.55  | -10.22 |
| O68883 CISY_SALTY Citrate synthase                  | 9  | Carbamidomethyl+C(9)  | DSHPMAVMCGITGALAAFYHDSL<br>DVNNPR     | 127 | 29 | 4  | 22.72 | y5*y5y6y10                               | 3159.42 | 108.374 | 11490 | 4 | 790.61  | -8.89  |
| O68883 CISY_SALTY Citrate synthase                  | 10 |                       | GTLGQDVIDIR                           | 22  | 11 | 5  | 24.31 | b7*b7y3y8*y8                             | 1186.66 | 103.949 | 1762  | 2 | 593.83  | 12.34  |
| O68883 CISY_SALTY Citrate synthase                  | 11 |                       | HTMIHEQITRLFHAFR                      | 110 | 16 | 3  | 25.53 | b4b5b7                                   | 2037.06 | 70.928  | 29013 | 3 | 679.69  | 1.56   |
| O68883 CISY_SALTY Citrate synthase                  | 12 | Carbamidomethyl+C(3)  | ETCHEVLKELGTK                         | 320 | 13 | 3  | 20.64 | b7b11y3                                  | 1543.76 | 72.939  | 18211 | 2 | 772.38  | -14.55 |
| O68883 CISY_SALTY Citrate synthase                  | 13 |                       | DDLLEVAMELEHIALNDPYFIEKK              | 333 | 24 | 10 | 64.83 | b6b8*b8b9b10*b10b11*b11<br>b12y22        | 2845.40 | 136.387 | 3441  | 2 | 1423.20 | -12.01 |
| O68883 CISY_SALTY Citrate synthase                  | 14 | Carbamidomethyl+C(8)  | ATVMRETCHVLK                          | 315 | 13 | 3  | 20.64 | b7b11y3                                  | 1573.78 | 84.451  | 2317  | 2 | 787.39  | -1.47  |
| O68883 CISY_SALTY Citrate synthase                  | 15 |                       | IARPRQLYTGYDK                         | 405 | 13 | 5  | 58.54 | y3y6y7y8y10                              | 1580.84 | 123.355 | 1796  | 2 | 790.92  | -9.73  |
| O68883 CISY_SALTY Citrate synthase                  | 16 |                       | NYDPRATVMR                            | 310 | 10 | 3  | 33.9  | b5b6b9                                   | 1222.60 | 120.751 | 1712  | 1 | 1222.60 | -0.40  |
| O68883 CISY_SALTY Citrate synthase                  | 17 | Oxidation+M(15)       | AMGIPSSMFTVIFAMAR                     | 371 | 17 | 4  | 22.93 | b4b14y5y11                               | 1845.91 | 98.829  | 54496 | 3 | 615.97  | 0.46   |
| O68883 CISY_SALTY Citrate synthase                  | 18 | Oxidation+M(8)        | DDLLEVAMELEHIALNDPYFIEKK              | 333 | 24 | 3  | 23    | b4b5b10                                  | 2861.39 | 79.858  | 2239  | 3 | 954.47  | -13.65 |
| P14062 6PGD_SALTY 6-phohogluconate<br>dehydrogenase | 1  | Carbamidomethyl+C(11) | IAAVAEDGEPCTVYIGADGAGHY<br>VK         | 158 | 25 | 8  | 32.28 | b2b3b4y1y5y10y21y25                      | 2563.22 | 59.309  | 35705 | 3 | 855.08  | 0.95   |
| P14062 6PGD_SALTY 6-phohogluconate<br>dehydrogenase | 2  |                       | AAVLPANLIQAQR                         | 432 | 13 | 7  | 20.64 | b2b3y2y4*y4y9y13                         | 1364.80 | 63.505  | 15761 | 2 | 682.90  | -2.68  |
| P14062 6PGD_SALTY 6-phohogluconate<br>dehydrogenase | 3  |                       | IVSYAQGFSQLR                          | 329 | 12 | 6  | 37.26 | b2b5y6y8y10y12                           | 1368.73 | 61.418  | 12727 | 2 | 684.87  | 0.71   |
| P14062 6PGD_SALTY 6-phohogluconate<br>dehydrogenase | 4  |                       | WTSQSALDLGEPLSLITESVFAR               | 264 | 23 | 7  | 37.6  | b7y2y3y5y6y7y23                          | 2520.32 | 116.684 | 12170 | 2 | 1260.66 | 9.69   |
| P14062 6PGD_SALTY 6-phohogluconate<br>dehydrogenase | 5  |                       | TDKEGIFHTEWLE                         | 455 | 13 | 9  | 66.99 | b2*b2b9*b9b10b11y8y9y10                  | 1604.75 | 51.031  | 3613  | 2 | 802.88  | -3.42  |
| P14062 6PGD_SALTY 6-phohogluconate<br>dehydrogenase | 6  |                       | DVVAYAVQNGIPVPTFSAAVAYY<br>DSYR       | 405 | 27 | 5  | 11.91 | b4*b4y8*y8y14                            | 2936.42 | 136.456 | 2925  | 2 | 1468.72 | -7.48  |
| P14062 6PGD_SALTY 6-phohogluconate<br>dehydrogenase | 7  |                       | ELSAEGFNFIGTGVSGGEEGALK               | 113 | 23 | 13 | 70.44 | b3*b3b7b9b11*b11*b11b1<br>3y3y9y10y13y19 | 2269.14 | 68.155  | 51940 | 3 | 757.05  | 17.65  |
| P14062 6PGD_SALTY 6-phohogluconate<br>dehydrogenase | 8  |                       | GDIIDGGNTFFQDTIR                      | 93  | 17 | 4  | 16.32 | b6b11*b11y8                              | 1881.91 | 35.229  | 21126 | 3 | 627.98  | -10.70 |
| P14062 6PGD_SALTY 6-phohogluconate<br>dehydrogenase | 9  |                       | MVHNGIEYGDMQLIAEAYSLLK                | 183 | 22 | 5  | 13.44 | b3b7*b7y12*y12                           | 2495.26 | 112.206 | 17296 | 3 | 832.42  | 10.57  |
| P14062 6PGD_SALTY 6-phohogluconate<br>dehydrogenase | 10 |                       | IADEYQQALR                            | 395 | 10 | 4  | 26.91 | b4y3y6*y6                                | 1206.62 | 46.328  | 9505  | 2 | 603.81  | 9.31   |
| P14062 6PGD_SALTY 6-phohogluconate<br>dehydrogenase | 11 |                       | GGLNLSNEELANTFTTEWNNGELS<br>SYLIDITK  | 205 | 31 | 7  | 24.42 | b3b10*b10b11y9y12*y12                    | 3442.65 | 94.965  | 4631  | 3 | 1148.22 | -5.39  |
| P14062 6PGD_SALTY 6-phohogluconate<br>dehydrogenase | 12 |                       | AGAGTDAAIIDSLKPYLEK                   | 75  | 18 | 3  | 24.5  | b7b10b11                                 | 1819.91 | 80.319  | 3360  | 3 | 607.31  | -18.98 |
| P14062 6PGD_SALTY 6-phohogluconate<br>dehydrogenase | 13 |                       | ITDAYAENADIANLLLAPYFK                 | 373 | 21 | 3  | 22.33 | b20y4y5                                  | 2326.22 | 105.616 | 3219  | 2 | 1163.61 | 9.87   |
| P14062 6PGD_SALTY 6-phohogluconate<br>dehydrogenase | 14 |                       | DEDGNYLVDVILDEAANK                    | 242 | 18 | 5  | 22.98 | b14y5*y5y6*y6                            | 1992.92 | 85.739  | 2273  | 2 | 996.97  | -8.45  |
| P14062 6PGD_SALTY 6-phohogluconate<br>dehydrogenase | 15 |                       | AQPAGDKAEFIEK                         | 307 | 13 | 4  | 34.07 | b8y3y9y11                                | 1403.72 | 34.842  | 11605 | 2 | 702.36  | 1.83   |
| P14062 6PGD_SALTY 6-phohogluconate<br>dehydrogenase | 16 |                       | ELSAEGFNFIGTGVSGGEEGALKG<br>PSIMPGGQK | 113 | 33 | 6  | 21.6  | b10b13*b13b14y7*y7                       | 3221.56 | 82.743  | 7638  | 3 | 1074.53 | -4.77  |

|                                                                   |    |                       |                                       |     |    |    |       |                                |         |         |       |   |         |        |
|-------------------------------------------------------------------|----|-----------------------|---------------------------------------|-----|----|----|-------|--------------------------------|---------|---------|-------|---|---------|--------|
| [P14062]6PGD_SALTY 6-phohogluconate dehydrogenase                 | 17 |                       | IVSYAQGFSQLRAASDEYHWDLN YGEIAK        | 329 | 29 | 4  | 24.81 | y7y9y20y24                     | 3331.63 | 111.725 | 6309  | 4 | 833.66  | 9.23   |
| [P14062]6PGD_SALTY 6-phohogluconate dehydrogenase                 | 18 |                       | AGAGTDAAIDSLKPYLEKGDIIIDG GNTFFQDTIR  | 75  | 35 | 4  | 23    | b9b10b12°b12                   | 3682.85 | 98.111  | 3464  | 4 | 921.47  | -3.71  |
| [P14062]6PGD_SALTY 6-phohogluconate dehydrogenase                 | 19 |                       | QQIGVVGMMAVMGRNLALNIESR               | 3   | 22 | 4  | 13.44 | b4*b4b8y13                     | 2356.26 | 88.334  | 1503  | 2 | 1178.63 | 1.45   |
| [P14062]6PGD_SALTY 6-phohogluconate dehydrogenase                 | 20 | Phosphoryl STY(8)     | DYFGAHTYKR                            | 445 | 10 | 3  | 28.67 | b6_H3PO4 b6b7y4                | 1337.54 | 28.597  | 25213 | 3 | 446.52  | -14.33 |
| [P14062]6PGD_SALTY 6-phohogluconate dehydrogenase                 | 21 | Phosphoryl STY(15)    | AGAGTDAAIDSLKPYLEK                    | 75  | 18 | 4  | 24.82 | b3b14b16y3                     | 1899.89 | 57.815  | 17574 | 3 | 633.97  | -5.65  |
| [P14062]6PGD_SALTY 6-phohogluconate dehydrogenase                 | 22 | Oxidation+M(11)       | QQIGVVGMMAVMGR                        | 3   | 13 | 3  | 25.41 | b10y8y9                        | 1361.70 | 36.362  | 3234  | 3 | 454.57  | -1.43  |
| [P14845]CARA_SALTY Carbamoyl-phohate synthase small chain         | 1  | Carbamidomethyl+C(12) | FLETDIPLFGICLGHQLLALASGAK             | 257 | 25 | 12 | 73.85 | b2b3b6y4y5y7y12y17y19y20y23y25 | 2684.45 | 127.260 | 35305 | 3 | 895.49  | 1.46   |
| [P14845]CARA_SALTY Carbamoyl-phohate synthase small chain         | 2  |                       | LTVVPAQTSAAEVLK                       | 215 | 15 | 7  | 29.44 | b1b14y8y11°y11y12y15           | 1584.89 | 62.283  | 23395 | 2 | 792.95  | 2.62   |
| [P14845]CARA_SALTY Carbamoyl-phohate synthase small chain         | 3  |                       | EVTTAETYR                             | 160 | 9  | 5  | 46.05 | b2y3y5y7y9                     | 1069.51 | 27.395  | 6547  | 2 | 535.26  | -7.76  |
| [P14845]CARA_SALTY Carbamoyl-phohate synthase small chain         | 4  |                       | AFPGLNGMDLAKEVTTAETYR                 | 148 | 21 | 8  | 47.87 | b2b3b6b10b12y4y8y9             | 2284.13 | 108.962 | 5336  | 3 | 762.05  | 0.21   |
| [P14845]CARA_SALTY Carbamoyl-phohate synthase small chain         | 5  |                       | QIVTLTYPHIGNVGTNK                     | 50  | 17 | 6  | 45.09 | b3b4b11y3y7y8                  | 1854.97 | 51.968  | 46248 | 3 | 619.00  | -17.97 |
| [P14845]CARA_SALTY Carbamoyl-phohate synthase small chain         | 6  |                       | AFPGLNGMDLAK                          | 148 | 12 | 3  | 22.28 | b4y3y6                         | 1233.61 | 36.227  | 3831  | 2 | 617.31  | -12.07 |
| [P14845]CARA_SALTY Carbamoyl-phohate synthase small chain         | 7  | Carbamidomethyl+C(18) | MNPDGIFLSNGPGDPAPCDYAITA IQK          | 230 | 27 | 5  | 21.2  | b10b14y11y13y19                | 2862.40 | 82.139  | 2843  | 2 | 1431.70 | 18.42  |
| [P14845]CARA_SALTY Carbamoyl-phohate synthase small chain         | 8  |                       | NVVMITAQNHGFAVDEDESLPANL R            | 302 | 24 | 4  | 12.71 | b4b8°b8y14                     | 2611.24 | 68.934  | 2475  | 2 | 1306.12 | -20.48 |
| [P14845]CARA_SALTY Carbamoyl-phohate synthase small chain         | 9  |                       | SEDDLPHFVVAYDFGAK                     | 185 | 17 | 4  | 33.72 | y3y5y6y11                      | 1909.86 | 45.143  | 1688  | 3 | 637.29  | -17.38 |
| [P14845]CARA_SALTY Carbamoyl-phohate synthase small chain         | 10 |                       | EVTTAETYRWTQGSWTLK                    | 160 | 18 | 3  | 24.5  | b3b6b7                         | 2157.08 | 81.695  | 50450 | 2 | 1079.04 | 7.13   |
| [P14845]CARA_SALTY Carbamoyl-phohate synthase small chain         | 11 |                       | QIVTLTYPHIGNVGTNKADEESSQ VHAQGLVIR    | 50  | 33 | 3  | 11.06 | b17b25y19                      | 3574.84 | 136.334 | 31941 | 4 | 894.46  | -7.38  |
| [P14845]CARA_SALTY Carbamoyl-phohate synthase small chain         | 12 |                       | AFPGLNGMDLAKEVTTAETYR                 | 148 | 21 | 4  | 21.7  | b3b7b11y4                      | 2284.15 | 79.884  | 29862 | 3 | 762.06  | 11.65  |
| [P14845]CARA_SALTY Carbamoyl-phohate synthase small chain         | 13 |                       | MKFGHHGGNHPVK                         | 285 | 13 | 4  | 34.07 | b3b5b7y11                      | 1445.73 | 58.403  | 6093  | 3 | 482.58  | 7.35   |
| [P14845]CARA_SALTY Carbamoyl-phohate synthase small chain         | 14 | Carbamidomethyl+C(8)  | EKGAQNGCIIAGDSPDAK                    | 123 | 18 | 4  | 21.75 | b5b13y5y9                      | 1830.86 | 62.728  | 2893  | 4 | 458.47  | -1.40  |
| [P14845]CARA_SALTY Carbamoyl-phohate synthase small chain         | 15 | Oxidation+M(8)        | AFPGLNGMDLAK                          | 148 | 12 | 3  | 29.48 | b3b4b9                         | 1249.63 | 38.857  | 2071  | 2 | 625.32  | 0.59   |
| [P15171]LEUC1_SALTY 3-isopropylmalate dehydratase large subunit 1 | 1  |                       | AGLVAPDETTFNYSVK                      | 229 | 15 | 6  | 29.44 | b5y4*y4y10y11y15               | 1624.83 | 64.516  | 17290 | 2 | 812.92  | 3.91   |
| [P15171]LEUC1_SALTY 3-isopropylmalate dehydratase large subunit 1 | 2  | Carbamidomethyl+C(4)  | MTLCNMAIEMGAK                         | 216 | 13 | 6  | 58.54 | y4y9y10y11y12y13               | 1469.67 | 70.538  | 7952  | 2 | 735.34  | 8.14   |
| [P15171]LEUC1_SALTY 3-isopropylmalate dehydratase large subunit 1 | 3  |                       | AEEIAPQVTWGTNPGQVISVTDIIP DPASFSDPVER | 280 | 36 | 4  | 10.89 | b12°b12y4y6                    | 3835.93 | 101.808 | 2798  | 3 | 1279.32 | 7.26   |
| [P15171]LEUC1_SALTY 3-isopropylmalate dehydratase large subunit 1 | 4  |                       | IQMQELIK                              | 80  | 8  | 3  | 36.1  | b3y3y6                         | 1002.56 | 58.405  | 9969  | 2 | 501.78  | -7.00  |
| [P15171]LEUC1_SALTY 3-isopropylmalate dehydratase large subunit 1 | 5  |                       | LNPGER                                | 417 | 6  | 1  | 13.62 | y3                             | 685.35  | 72.379  | 5948  | 1 | 685.35  | -13.89 |

|                                                                          |    |                                                      |                                    |     |    |    |       |                          |         |         |        |   |         |        |
|--------------------------------------------------------------------------|----|------------------------------------------------------|------------------------------------|-----|----|----|-------|--------------------------|---------|---------|--------|---|---------|--------|
| P15717 LEUC1_SALTY 3-isopropylmalate dehydratase large subunit 1         | 6  |                                                      | IFIEAGFEWR                         | 393 | 10 | 5  | 47.91 | b5y3y7°y7y9              | 1267.66 | 38.761  | 5377   | 2 | 634.33  | 12.23  |
| P15717 LEUC1_SALTY 3-isopropylmalate dehydratase large subunit 1         | 7  |                                                      | ALAYMGLQPGVPLTDVAIDK               | 321 | 20 | 3  | 14.37 | b7y6y8                   | 2072.07 | 105.856 | 4695   | 2 | 1036.54 | -18.50 |
| P15717 LEUC1_SALTY 3-isopropylmalate dehydratase large subunit 1         | 8  |                                                      | TFATMDHNVSTQTK                     | 56  | 14 | 3  | 19.29 | b3y5y7                   | 1580.75 | 36.655  | 4577   | 2 | 790.88  | 7.49   |
| P15717 LEUC1_SALTY 3-isopropylmalate dehydratase large subunit 1         | 9  |                                                      | ALSMGR                             | 209 | 7  | 4  | 37.46 | b5°b5b6y6                | 763.39  | 20.530  | 2694   | 2 | 382.20  | 20.39  |
| P15717 LEUC1_SALTY 3-isopropylmalate dehydratase large subunit 1         | 10 |                                                      | THLVSPAMAAAAVTGHFADIR              | 441 | 22 | 6  | 28.96 | b9b11°b11b12y8y11        | 2207.13 | 90.684  | 2217   | 2 | 1104.07 | -2.77  |
| P15717 LEUC1_SALTY 3-isopropylmalate dehydratase large subunit 1         | 11 |                                                      | AQAEAEGLDK                         | 383 | 10 | 6  | 41.1  | b4°b4b9y5°y5y6           | 1031.48 | 98.202  | 1635   | 2 | 516.24  | -22.13 |
| P15717 LEUC1_SALTY 3-isopropylmalate dehydratase large subunit 1         | 12 | Carbamidomethyl+C(14)<br>;Carbamidomethyl+C(17)<br>) | IFIEAGFEWRLPGCSMCLAMNDR            | 393 | 24 | 4  | 19.02 | b7b9°b9b11               | 2887.30 | 85.599  | 116125 | 3 | 963.11  | -4.23  |
| P15717 LEUC1_SALTY 3-isopropylmalate dehydratase large subunit 1         | 13 | Carbamidomethyl+C(26)                                | ALAYMGLQPGVPLTDVAIDKVFI<br>GSCTNSR | 321 | 30 | 7  | 31.66 | b6y4*y4y7y8y11y22        | 3193.65 | 94.663  | 7085   | 3 | 1065.22 | 4.05   |
| P15717 LEUC1_SALTY 3-isopropylmalate dehydratase large subunit 1         | 14 |                                                      | AGLVAPDETTFNyVKGR                  | 229 | 17 | 6  | 26.15 | b3b7b9°b9y9°y9           | 1837.93 | 37.243  | 3802   | 3 | 613.31  | -8.57  |
| P15717 LEUC1_SALTY 3-isopropylmalate dehydratase large subunit 1         | 15 |                                                      | TMKIEVTGNAAPGITAK                  | 164 | 17 | 5  | 26.15 | b3b9b12*b12y14           | 1701.93 | 88.278  | 2436   | 3 | 567.98  | 7.60   |
| P15717 LEUC1_SALTY 3-isopropylmalate dehydratase large subunit 1         | 16 | Oxidation+M()                                        | TFATMDHNVSTQTKDINASGEMAR           | 56  | 24 | 4  | 16.87 | b3b11y4y8                | 2641.21 | 35.449  | 40094  | 3 | 881.07  | 4.53   |
| P15717 LEUC1_SALTY 3-isopropylmalate dehydratase large subunit 1         | 17 | Oxidation+M(8)                                       | THLVSPAMAAAAVTGHFADIR              | 441 | 22 | 4  | 13.44 | b6b12°b12y7              | 2223.11 | 68.041  | 4120   | 3 | 741.71  | -11.42 |
| Q7CPK0 UGPB_SALTY sn-glycerol-3-phohate-binding periplasmic protein ugpB | 1  |                                                      | TGYLPITTAAYELTR                    | 343 | 15 | 11 | 87.25 | b1b3b4y1y5y6y7y8y9y11y15 | 1669.89 | 84.044  | 56214  | 2 | 835.45  | 3.80   |
| Q7CPK0 UGPB_SALTY sn-glycerol-3-phohate-binding periplasmic protein ugpB | 2  |                                                      | TIVDEELESVWTGKK                    | 397 | 15 | 3  | 18.14 | b5y4y13                  | 1733.88 | 74.625  | 27437  | 3 | 578.63  | -10.63 |
| Q7CPK0 UGPB_SALTY sn-glycerol-3-phohate-binding periplasmic protein ugpB | 3  |                                                      | LGNMPQIR                           | 389 | 8  | 3  | 40.87 | y4y5y7                   | 928.50  | 46.538  | 24430  | 2 | 464.75  | -6.05  |
| Q7CPK0 UGPB_SALTY sn-glycerol-3-phohate-binding periplasmic protein ugpB | 4  |                                                      | FNyGVGMMPYDADIK                    | 282 | 15 | 4  | 26.22 | b2y5y7y10                | 1720.79 | 73.624  | 16866  | 2 | 860.90  | 8.65   |
| Q7CPK0 UGPB_SALTY sn-glycerol-3-phohate-binding periplasmic protein ugpB | 5  |                                                      | TIVDEELESVWTGK                     | 397 | 14 | 6  | 58.28 | b8b11b12y10y11y12        | 1605.81 | 81.516  | 14930  | 2 | 803.41  | 8.36   |
| Q7CPK0 UGPB_SALTY sn-glycerol-3-phohate-binding periplasmic protein ugpB | 6  | Carbamidomethyl+C(6)                                 | FYNGDCAMTTASSGLANIR                | 258 | 20 | 5  | 23.79 | y4*y4y11y12y20           | 2135.97 | 59.990  | 11942  | 2 | 1068.49 | 10.63  |
| Q7CPK0 UGPB_SALTY sn-glycerol-3-phohate-binding periplasmic protein ugpB | 7  |                                                      | FLDFLAKPENAAEWHQK                  | 326 | 17 | 3  | 16.32 | b11b13y6                 | 2044.03 | 73.144  | 40900  | 3 | 682.01  | -1.25  |

|                                                                          |    |                      |                                        |     |    |   |       |                        |         |         |       |   |         |        |
|--------------------------------------------------------------------------|----|----------------------|----------------------------------------|-----|----|---|-------|------------------------|---------|---------|-------|---|---------|--------|
| Q7CPK0 UGPB_SALTY sn-glycerol-3-phohate-binding periplasmic protein ugpB | 8  |                      | QMLNKPPLPFTK                           | 374 | 12 | 3 | 26.26 | b6y3y4                 | 1413.78 | 60.451  | 32210 | 3 | 471.93  | -5.53  |
| Q7CPK0 UGPB_SALTY sn-glycerol-3-phohate-binding periplasmic protein ugpB | 9  |                      | HTALGLALSIAFTGQALAVTTIPF<br>WHSMEGELGK | 5   | 34 | 3 | 22.92 | y7y8y10                | 3567.87 | 101.151 | 12039 | 4 | 892.72  | 0.96   |
| Q7CPK0 UGPB_SALTY sn-glycerol-3-phohate-binding periplasmic protein ugpB | 10 |                      | FNQANPDYK                              | 47  | 9  | 4 | 30.49 | b3*b3b5y3              | 1096.50 | 50.994  | 6415  | 3 | 366.17  | -6.68  |
| Q7CPK0 UGPB_SALTY sn-glycerol-3-phohate-binding periplasmic protein ugpB | 11 |                      | NNGFDGTDAVLEFNKPEQVK                   | 212 | 20 | 7 | 42.42 | b4y4y6y9°y9y10y18      | 2222.10 | 64.375  | 4675  | 2 | 1111.55 | 13.07  |
| Q7CPK0 UGPB_SALTY sn-glycerol-3-phohate-binding periplasmic protein ugpB | 12 |                      | GAPQNAIIGGASLWVMQGK                    | 297 | 19 | 8 | 39.11 | b3b4b6b12*b12y6y14*y14 | 1897.99 | 85.190  | 2918  | 3 | 633.34  | -0.26  |
| Q7CPK0 UGPB_SALTY sn-glycerol-3-phohate-binding periplasmic protein ugpB | 13 |                      | EVDSLAQR                               | 39  | 8  | 4 | 51.08 | b4b6y5y6               | 917.49  | 42.077  | 2761  | 1 | 917.49  | 18.63  |
| Q7CPK0 UGPB_SALTY sn-glycerol-3-phohate-binding periplasmic protein ugpB | 14 |                      | SGHLLSQPFNSSTPVLYYNK                   | 132 | 20 | 5 | 36.04 | b6y3*y3y4y5            | 2252.18 | 65.331  | 2512  | 4 | 563.80  | 18.43  |
| Q7CPK0 UGPB_SALTY sn-glycerol-3-phohate-binding periplasmic protein ugpB | 15 |                      | TWQELADYTAK                            | 167 | 11 | 6 | 47.74 | b6°b6b10y5y6y9         | 1325.63 | 37.837  | 1586  | 2 | 663.32  | -3.87  |
| Q7CPK0 UGPB_SALTY sn-glycerol-3-phohate-binding periplasmic protein ugpB | 16 |                      | SGHLLSQPFNSSTPVLYYNKDAFK               | 132 | 24 | 4 | 16.87 | b6b11y4y7              | 2713.33 | 105.863 | 20243 | 4 | 679.09  | -10.53 |
| Q7CPK0 UGPB_SALTY sn-glycerol-3-phohate-binding periplasmic protein ugpB | 17 |                      | KGDFSIVGR                              | 242 | 9  | 7 | 44.96 | b4°b4b5°b5y6°y6y7      | 1028.51 | 62.245  | 4346  | 2 | 514.76  | -6.29  |
| Q7CPK0 UGPB_SALTY sn-glycerol-3-phohate-binding periplasmic protein ugpB | 18 |                      | EVDSLAQRFNQANPDYK                      | 39  | 17 | 4 | 27.4  | b3y3y12y13             | 1994.93 | 117.635 | 2891  | 2 | 997.97  | -11.56 |
| Q7CPK0 UGPB_SALTY sn-glycerol-3-phohate-binding periplasmic protein ugpB | 19 |                      | ETYTGVAKFDFLAKPENAAEWH<br>QK           | 318 | 25 | 3 | 21.95 | b3b4y10                | 2893.48 | 115.643 | 2796  | 3 | 965.16  | 8.18   |
| Q7CPK0 UGPB_SALTY sn-glycerol-3-phohate-binding periplasmic protein ugpB | 20 |                      | HIALLEEMNKK                            | 232 | 11 | 3 | 24.31 | b8b10y6                | 1325.73 | 83.556  | 2228  | 3 | 442.58  | 0.55   |
| Q7CPK0 UGPB_SALTY sn-glycerol-3-phohate-binding periplasmic protein ugpB | 21 |                      | AGLDPEQPPKTWQELADYTAK                  | 157 | 21 | 4 | 13.88 | b9b12°b12y6            | 2358.14 | 83.544  | 1873  | 3 | 786.72  | -10.35 |
| Q7CPK0 UGPB_SALTY sn-glycerol-3-phohate-binding periplasmic protein ugpB | 22 | Oxidation+M()        | TGNAPAILQVYEVGTATMMASK                 | 77  | 22 | 3 | 13.44 | b5b11y12               | 2269.13 | 106.757 | 2217  | 3 | 757.05  | 3.01   |
| P02911 ARGT_SALTY Lysine-arginine-ornithine-binding periplasmic protein  | 1  |                      | GVDVVAYANQDLIYSDLTAGR                  | 155 | 21 | 4 | 13.88 | b6y8y13y21             | 2240.12 | 71.701  | 81891 | 3 | 747.38  | 0.54   |
| P02911 ARGT_SALTY Lysine-arginine-ornithine-binding periplasmic protein  | 2  | Carbamidomethyl+C(1) | CTWVASDFDALIPSLK                       | 66  | 16 | 7 | 34.77 | b3b5b12°b12y4y11y16    | 1822.91 | 97.497  | 36852 | 2 | 911.96  | 5.42   |
| P02911 ARGT_SALTY Lysine-arginine-ornithine-binding periplasmic protein  | 3  |                      | YFGDGTGVGLR                            | 211 | 11 | 4 | 24.31 | b9y7y9y11              | 1141.57 | 54.644  | 33679 | 2 | 571.29  | 6.20   |
| P02911 ARGT_SALTY Lysine-arginine-ornithine-binding periplasmic protein  | 4  |                      | IGTDTTYAPFSSK                          | 29  | 13 | 3 | 29.88 | y3y5y12                | 1387.68 | 51.976  | 36271 | 2 | 694.34  | 2.46   |

|                                                                         |    |                                                     |                                   |     |    |    |       |                                   |         |        |       |   |        |        |
|-------------------------------------------------------------------------|----|-----------------------------------------------------|-----------------------------------|-----|----|----|-------|-----------------------------------|---------|--------|-------|---|--------|--------|
| P02911 ARGT_SALTY Lysine-arginine-ornithine-binding periplasmic protein | 5  |                                                     | QQEIAFSDK                         | 99  | 9  | 3  | 30.49 | b6y5y6                            | 1065.52 | 39.650 | 11048 | 2 | 533.26 | -1.83  |
| P02911 ARGT_SALTY Lysine-arginine-ornithine-binding periplasmic protein | 6  |                                                     | QPAGK                             | 193 | 5  | 1  | 13.22 | y3                                | 500.28  | 44.316 | 9783  | 1 | 500.28 | 1.77   |
| P02911 ARGT_SALTY Lysine-arginine-ornithine-binding periplasmic protein | 7  |                                                     | GSPIQPTLESLK                      | 120 | 12 | 4  | 22.28 | b5y4y8*y8                         | 1269.69 | 42.415 | 5309  | 2 | 635.35 | -7.79  |
| P02911 ARGT_SALTY Lysine-arginine-ornithine-binding periplasmic protein | 8  |                                                     | ALTELR                            | 234 | 6  | 1  | 13.62 | y5                                | 702.41  | 34.293 | 5284  | 1 | 702.41 | -9.65  |
| P02911 ARGT_SALTY Lysine-arginine-ornithine-binding periplasmic protein | 9  |                                                     | LDAALQDEVAASEGFLK                 | 176 | 17 | 3  | 24.97 | y10y11y14                         | 1776.90 | 89.811 | 4295  | 2 | 888.95 | -0.96  |
| P02911 ARGT_SALTY Lysine-arginine-ornithine-binding periplasmic protein | 10 |                                                     | ALTELRQDGTYDK                     | 234 | 13 | 5  | 53.32 | b9y3y5y9y11                       | 1509.76 | 37.864 | 18486 | 2 | 755.38 | 4.69   |
| P02911 ARGT_SALTY Lysine-arginine-ornithine-binding periplasmic protein | 11 |                                                     | QPAGKEYAFAGPSVK                   | 193 | 15 | 5  | 31.82 | b3b4*b4y10y14                     | 1549.81 | 73.956 | 14147 | 2 | 775.41 | 7.33   |
| P02911 ARGT_SALTY Lysine-arginine-ornithine-binding periplasmic protein | 12 |                                                     | RQQEIAFSDK                        | 98  | 10 | 6  | 73.56 | b3b5b6b8y6y8                      | 1221.62 | 79.110 | 11328 | 2 | 611.32 | 0.70   |
| P02911 ARGT_SALTY Lysine-arginine-ornithine-binding periplasmic protein | 13 |                                                     | IGTDTTYAPFSSKDAK                  | 29  | 16 | 8  | 70.18 | b4b5b8b11b13y8y9y11               | 1701.82 | 46.447 | 2419  | 3 | 567.94 | -9.40  |
| P02911 ARGT_SALTY Lysine-arginine-ornithine-binding periplasmic protein | 14 | Carbamidomethyl+C(15)<br>;Oxidation+M(14)           | GEFIGFDIDLGEMCK                   | 45  | 16 | 4  | 24.26 | b7b11y5y7                         | 1860.81 | 25.953 | 5627  | 3 | 620.94 | -3.15  |
| P0A1P8 GLRX1_SALTY Glutaredoxin-1                                       | 1  | Carbamidomethyl+C(11)<br>;Carbamidomethyl+C(14<br>) | MFTVIFGRPGCPYCVR                  | 0   | 16 | 5  | 17.16 | b2b3y3y9y16                       | 1959.93 | 75.554 | 38549 | 3 | 653.98 | -7.16  |
| P0A1P8 GLRX1_SALTY Glutaredoxin-1                                       | 2  |                                                     | TVGKPVETVPQIFVDQK                 | 50  | 17 | 12 | 55.52 | b3b8*b8y1y2*y2y3y5y6y8y13y17      | 1885.02 | 63.821 | 35628 | 3 | 629.01 | -11.40 |
| P0A1P8 GLRX1_SALTY Glutaredoxin-1                                       | 3  |                                                     | ENLNLFA                           | 80  | 7  | 3  | 37.46 | b5y4y5                            | 820.43  | 46.350 | 64533 | 2 | 410.72 | 11.83  |
| P0A1P8 GLRX1_SALTY Glutaredoxin-1                                       | 4  | Carbamidomethyl+C(10)<br>;Carbamidomethyl+C(13<br>) | FTVIFGRPGCPYCVRAK                 | 1   | 17 | 4  | 29.91 | b10b11y10y12                      | 2028.01 | 71.932 | 3024  | 3 | 676.67 | -10.95 |
| P0A1P8 GLRX1_SALTY Glutaredoxin-1                                       | 5  | Carbamidomethyl+C(11)<br>;Carbamidomethyl+C(14<br>) | MFTVIFGRPGCPYCV                   | 0   | 15 | 0  | 4.45  |                                   | 1803.83 | 75.503 | 22824 | 3 | 601.95 | -2.64  |
| P0A1B7 ATPE_SALTY ATP synthase epsilon chain                            | 1  |                                                     | IQVTGSEGELGIYPGHAPLLTAIKP<br>GMIR | 23  | 29 | 12 | 49.8  | b2*b2b3b10b15b16y5y12y13y16y27y29 | 3018.62 | 81.221 | 92236 | 4 | 755.41 | -7.52  |
| P0A1B7 ATPE_SALTY ATP synthase epsilon chain                            | 2  |                                                     | AMTYHLDVVSAEQQMFSGLVEK            | 1   | 22 | 8  | 36.39 | b2b6*b6b9b11y8y10y11              | 2483.19 | 89.611 | 32710 | 3 | 828.40 | -0.88  |
| P0A1B7 ATPE_SALTY ATP synthase epsilon chain                            | 3  |                                                     | SSHGDVDYAQASAEAK                  | 107 | 17 | 6  | 41.59 | b7y2y5y7y8y9                      | 1748.80 | 44.112 | 18167 | 3 | 583.60 | -7.33  |
| P0A1B7 ATPE_SALTY ATP synthase epsilon chain                            | 4  |                                                     | AEEHIKSSHGDVDYAQASAEAK            | 101 | 23 | 3  | 13.05 | b12y14y20                         | 2456.18 | 91.270 | 65912 | 3 | 819.40 | 3.38   |
| Q8ZQZ6 SYL_SALTY Leucyl-tRNA synthetase                                 | 1  |                                                     | QTFNTAIAAIMELMNK                  | 719 | 16 | 11 | 56.16 | b4b6b7*b7y1y3y6y7*y7y9y16         | 1795.93 | 89.023 | 87310 | 3 | 599.31 | 11.01  |
| Q8ZQZ6 SYL_SALTY Leucyl-tRNA synthetase                                 | 2  |                                                     | NWVSPVDAIVERDEK                   | 583 | 15 | 4  | 26.22 | b3b8b9*b9                         | 1756.89 | 55.433 | 9654  | 2 | 878.95 | 0.07   |
| Q8ZQZ6 SYL_SALTY Leucyl-tRNA synthetase                                 | 3  | Carbamidomethyl+C(3)                                | YYCLSMLPYPSGR                     | 34  | 13 | 4  | 28.12 | y5y6y12*y12                       | 1606.76 | 75.114 | 8511  | 2 | 803.88 | 13.83  |
| Q8ZQZ6 SYL_SALTY Leucyl-tRNA synthetase                                 | 4  |                                                     | ITAYADELLRDLDK                    | 194 | 14 | 6  | 19.29 | b2*b2b3b6y4y14                    | 1635.86 | 50.995 | 6948  | 3 | 545.96 | 1.64   |

|                                                  |    |                                         |                                                |     |    |   |       |                                |         |         |       |   |         |        |
|--------------------------------------------------|----|-----------------------------------------|------------------------------------------------|-----|----|---|-------|--------------------------------|---------|---------|-------|---|---------|--------|
| Q8ZQZ6 SYL_SALTY Leucyl-tRNA synthetase          | 5  | Carbamidomethyl+C(15)                   | AAANNAELAAFIDECR                               | 270 | 16 | 3 | 17.16 | b4b7y10                        | 1735.80 | 75.601  | 3041  | 3 | 579.27  | -4.64  |
| Q8ZQZ6 SYL_SALTY Leucyl-tRNA synthetase          | 6  |                                         | YGLTIKPVILAADGSEPDLSSEQALT<br>EK               | 351 | 27 | 3 | 17.99 | y3y6y11                        | 2858.46 | 80.391  | 2723  | 3 | 953.49  | -13.58 |
| Q8ZQZ6 SYL_SALTY Leucyl-tRNA synthetase          | 7  |                                         | MQEQRPEEIESK                                   | 0   | 13 | 4 | 20.64 | b7y6y8°y8                      | 1666.79 | 36.630  | 2302  | 3 | 556.27  | 12.23  |
| Q8ZQZ6 SYL_SALTY Leucyl-tRNA synthetase          | 8  |                                         | GVLFNSGEFDGLAFEAAFNAIADK                       | 378 | 24 | 7 | 23.61 | b6b8°b8b14*b14y5y14            | 2503.19 | 71.955  | 9969  | 3 | 835.07  | -8.10  |
| Q8ZQZ6 SYL_SALTY Leucyl-tRNA synthetase          | 9  |                                         | NNTAPAPWTYDNIAYMK                              | 92  | 17 | 4 | 16.32 | b4y9°y9y13                     | 1969.94 | 72.688  | 9153  | 2 | 985.48  | 16.30  |
| Q8ZQZ6 SYL_SALTY Leucyl-tRNA synthetase          | 10 |                                         | NVLQPIGWDAFGLPAEGAAVK                          | 71  | 21 | 3 | 13.88 | b11b14y16                      | 2153.13 | 80.821  | 7930  | 2 | 1077.07 | -3.29  |
| Q8ZQZ6 SYL_SALTY Leucyl-tRNA synthetase          | 11 |                                         | YWGAPIPMVTLEDGTVLPTPEDQ<br>LPVILPEDVVMGDITSPIK | 426 | 42 | 5 | 28.92 | b4b7b9b10b15                   | 4546.28 | 101.974 | 6413  | 4 | 1137.33 | -11.92 |
| Q8ZQZ6 SYL_SALTY Leucyl-tRNA synthetase          | 12 |                                         | NWVSPVDAIVER                                   | 583 | 12 | 4 | 29.48 | b4b6b7°b7                      | 1384.75 | 35.399  | 4847  | 2 | 692.88  | 19.04  |
| Q8ZQZ6 SYL_SALTY Leucyl-tRNA synthetase          | 13 |                                         | NNGIDPQVMVER                                   | 624 | 12 | 4 | 34.25 | b9y4y7y8                       | 1371.64 | 31.640  | 3111  | 2 | 686.32  | -20.65 |
| Q8ZQZ6 SYL_SALTY Leucyl-tRNA synthetase          | 14 |                                         | TLGFGYDWSR                                     | 113 | 10 | 5 | 26.91 | b3°b3b7y5°y5                   | 1201.58 | 85.785  | 2400  | 2 | 601.29  | 9.45   |
| Q8ZQZ6 SYL_SALTY Leucyl-tRNA synthetase          | 15 |                                         | LVYEHTAK                                       | 675 | 8  | 3 | 36.1  | b4b6y7                         | 960.50  | 25.388  | 2089  | 2 | 480.75  | -17.60 |
| Q8ZQZ6 SYL_SALTY Leucyl-tRNA synthetase          | 16 |                                         | TTVNGMPALR                                     | 475 | 10 | 6 | 41.1  | b8°b8b9y7y9*y9                 | 1059.55 | 40.305  | 2085  | 2 | 530.28  | -8.06  |
| Q8ZQZ6 SYL_SALTY Leucyl-tRNA synthetase          | 17 |                                         | VQLHWDEK                                       | 13  | 8  | 5 | 67.31 | b3b4b6y3y5                     | 1054.51 | 120.863 | 2047  | 1 | 1054.51 | -21.30 |
| Q8ZQZ6 SYL_SALTY Leucyl-tRNA synthetase          | 18 | Carbamidomethyl+C(3)                    | YTCPQYQEGMLDSK                                 | 502 | 14 | 4 | 38.74 | y3y5y6y12                      | 1719.75 | 70.581  | 1954  | 4 | 430.69  | 9.44   |
| Q8ZQZ6 SYL_SALTY Leucyl-tRNA synthetase          | 19 | Carbamidomethyl+C(5)                    | EKYYCLSMPLPYPSGR                               | 32  | 15 | 3 | 18.14 | b4b14y9                        | 1863.87 | 68.116  | 16890 | 3 | 621.96  | -4.39  |
| Q8ZQZ6 SYL_SALTY Leucyl-tRNA synthetase          | 20 |                                         | YGADTVRLFMMFASPADMTLEW<br>QESGVEGANR           | 636 | 32 | 6 | 13.56 | b4b7°b7y6y9*y9                 | 3579.67 | 116.670 | 13097 | 3 | 1193.89 | 9.82   |
| Q8ZQZ6 SYL_SALTY Leucyl-tRNA synthetase          | 21 |                                         | NNGIDPQVMVERYGADTVR                            | 624 | 19 | 5 | 36.26 | b10b11y6°y6y7                  | 2134.05 | 107.039 | 6136  | 3 | 712.02  | 4.92   |
| Q8ZQZ6 SYL_SALTY Leucyl-tRNA synthetase          | 22 |                                         | NWIGRSEGVEITFDVK                               | 221 | 16 | 5 | 30.8  | b6b7y4°y4y14                   | 1849.93 | 95.050  | 5443  | 2 | 925.47  | -9.30  |
| Q8ZQZ6 SYL_SALTY Leucyl-tRNA synthetase          | 23 |                                         | DAAGHELVYTGMKMSK                               | 605 | 17 | 4 | 22.93 | b5b14y9y11                     | 1824.88 | 79.667  | 2431  | 2 | 912.94  | 11.30  |
| Q8ZQZ6 SYL_SALTY Leucyl-tRNA synthetase          | 24 |                                         | ITVPVDATEEQVRER                                | 813 | 15 | 4 | 18.14 | b11y3y10*y10                   | 1741.89 | 80.708  | 2238  | 2 | 871.45  | -7.64  |
| Q8ZQZ6 SYL_SALTY Leucyl-tRNA synthetase          | 25 | Oxidation+M(0)                          | YWGAPIPMVTLEDGTVLPTPEDQ<br>LPVILPEDVVMGDITSPIK | 426 | 42 | 3 | 16.46 | b6b10b13                       | 4562.38 | 112.519 | 19536 | 5 | 913.28  | 9.42   |
| Q8ZQZ6 SYL_SALTY Leucyl-tRNA synthetase          | 26 | Carbamidomethyl+C(4);<br>Oxidation+M(7) | QLLCQGMVLADAFYYVGENGER                         | 561 | 22 | 5 | 13.44 | b11°b11b16*b16y5               | 2549.19 | 81.702  | 5486  | 3 | 850.40  | 4.88   |
| Q8ZQZ6 SYL_SALTY Leucyl-tRNA synthetase          | 27 | Oxidation+M(9)                          | NNGIDPQVMVER                                   | 624 | 12 | 3 | 26.26 | b8b9y9                         | 1387.66 | 87.516  | 2078  | 2 | 694.33  | -5.37  |
| Q8ZQZ6 SYL_SALTY Leucyl-tRNA synthetase          | 28 | Oxidation+M(16)                         | NNTAPAPWTYDNIAYMK                              | 92  | 17 | 4 | 23.72 | b4°b4b6b9                      | 1985.91 | 45.208  | 1679  | 3 | 662.64  | 2.89   |
| P0A1V6 KPRS_SALTY Ribose-phohate pyrophohokinase | 1  |                                         | LFAGNATPELAQR                                  | 5   | 13 | 6 | 46.12 | y5y6*y6y10y11°y11              | 1387.74 | 52.737  | 18966 | 2 | 694.37  | 4.57   |
| P0A1V6 KPRS_SALTY Ribose-phohate pyrophohokinase | 2  |                                         | ITAVIPYFGYAR                                   | 84  | 12 | 4 | 26.26 | b4y2y6y7                       | 1370.75 | 79.673  | 16669 | 2 | 685.88  | 1.42   |
| P0A1V6 KPRS_SALTY Ribose-phohate pyrophohokinase | 3  |                                         | VFAYATHPIFSGNAANNLR                            | 243 | 19 | 9 | 31.63 | b1b9°b9b11b12°b12y8y12<br>*y12 | 2063.02 | 64.273  | 15079 | 3 | 688.35  | -10.65 |
| P0A1V6 KPRS_SALTY Ribose-phohate pyrophohokinase | 4  |                                         | LYTSLGDAAVGR                                   | 22  | 12 | 3 | 35.5  | y5y6y7                         | 1222.64 | 51.377  | 10845 | 2 | 611.82  | -1.30  |



|                                                                    |    |                                                      |                                       |     |    |   |       |                         |         |         |       |   |         |        |
|--------------------------------------------------------------------|----|------------------------------------------------------|---------------------------------------|-----|----|---|-------|-------------------------|---------|---------|-------|---|---------|--------|
| [P0A1V6]KPRS_SALTY Ribose-phohate pyrophohokinase                  | 5  |                                                      | LLNDTDMAIIDK                          | 182 | 12 | 5 | 37.26 | b4b9b11y3y12            | 1361.70 | 90.126  | 4301  | 2 | 681.35  | 3.05   |
| [P0A1V6]KPRS_SALTY Ribose-phohate pyrophohokinase                  | 6  |                                                      | AAEALK                                | 231 | 6  | 2 | 13.62 | b4*b4                   | 602.34  | 30.644  | 14837 | 1 | 602.34  | -10.13 |
| [P0A1V6]KPRS_SALTY Ribose-phohate pyrophohokinase                  | 7  | Carbamidomethyl+C(10)                                | NSVIDEVVVCDTIPTDEIK                   | 262 | 20 | 8 | 49.73 | b12*b12b13b15y4y7y10y14 | 2259.18 | 87.517  | 9640  | 2 | 1130.09 | 16.10  |
| [P0A1V6]KPRS_SALTY Ribose-phohate pyrophohokinase                  | 8  |                                                      | RISNEESISAMFEH                        | 301 | 14 | 4 | 31.54 | b11y3y7y9               | 1649.77 | 38.895  | 4089  | 2 | 825.39  | 8.73   |
| [P0A1V6]KPRS_SALTY Ribose-phohate pyrophohokinase                  | 9  | Carbamidomethyl+C(18)<br>;Carbamidomethyl+C(32)<br>) | ANVSQVMHIIGDVAGRDCVLVDD<br>MIDTGGTLCK | 198 | 33 | 4 | 24.43 | b3b23y9y10              | 3559.68 | 89.028  | 3373  | 4 | 890.68  | -4.80  |
| [P0A1V6]KPRS_SALTY Ribose-phohate pyrophohokinase                  | 10 | Oxidation+M(7)                                       | ANVSQVMHIIGDVAGR                      | 198 | 16 | 4 | 27.67 | b4b9b13y6               | 1682.87 | 58.462  | 72081 | 2 | 841.94  | 2.97   |
| [Q8ZKF5]NRFA_SALTY Cytochrome c-552                                | 1  |                                                      | LIQQEGEDGYFHGK                        | 132 | 14 | 7 | 41.75 | b1b2y4y5y6y12y14        | 1620.74 | 48.972  | 44853 | 3 | 540.92  | -14.01 |
| [Q8ZKF5]NRFA_SALTY Cytochrome c-552                                | 2  |                                                      | AMEAIGKPFDK                           | 187 | 11 | 4 | 13.3  | b8b9*y6y11              | 1206.63 | 38.978  | 16664 | 2 | 603.82  | 12.24  |
| [Q8ZKF5]NRFA_SALTY Cytochrome c-552                                | 3  |                                                      | MLGSAMDK                              | 400 | 8  | 6 | 33.09 | b5*b5b6y6*y6y8          | 852.41  | 39.767  | 9311  | 2 | 426.71  | 12.67  |
| [Q8ZKF5]NRFA_SALTY Cytochrome c-552                                | 4  |                                                      | AAWDAGATDAEMKPILNDIR                  | 355 | 20 | 3 | 14.37 | b3b15y13                | 2158.05 | 61.526  | 4977  | 3 | 720.02  | -6.45  |
| [Q8ZKF5]NRFA_SALTY Cytochrome c-552                                | 5  |                                                      | LYTDHK                                | 296 | 6  | 3 | 40.07 | b3b4y3                  | 776.40  | 41.623  | 89224 | 2 | 388.70  | 4.09   |
| [Q8ZKF5]NRFA_SALTY Cytochrome c-552                                | 6  | Carbamidomethyl+C(11)<br>;Carbamidomethyl+C(14)<br>) | TAEDGPLMACWSCK                        | 111 | 15 | 3 | 24.16 | b6y3y4                  | 1722.76 | 61.566  | 10201 | 3 | 574.92  | 18.14  |
| [Q8ZKF5]NRFA_SALTY Cytochrome c-552                                | 7  |                                                      | FFSLIFPFFFITSVYAEQTPESAK              | 10  | 24 | 4 | 16.87 | b10b13y11y17            | 2816.40 | 99.262  | 3801  | 2 | 1408.70 | -7.02  |
| [Q8ZKF5]NRFA_SALTY Cytochrome c-552                                | 8  |                                                      | GITHEIPLDISTKEK                       | 423 | 16 | 4 | 25.53 | b3*b3b5b6               | 1777.97 | 105.541 | 60669 | 3 | 593.33  | 1.51   |
| [Q8ZKF5]NRFA_SALTY Cytochrome c-552                                | 9  |                                                      | IKVEDQLVHAHFEAK                       | 340 | 15 | 4 | 24.16 | b14y11*y11y12           | 1763.93 | 96.541  | 36752 | 2 | 882.47  | -8.44  |
| [Q8ZKF5]NRFA_SALTY Cytochrome c-552                                | 10 |                                                      | TPMLKAQHPEYETWSAGIHGK                 | 256 | 21 | 4 | 20.52 | y4y9*y9y15              | 2381.17 | 94.492  | 8832  | 2 | 1191.09 | -2.36  |
| [Q8ZKF5]NRFA_SALTY Cytochrome c-552                                | 11 |                                                      | AMEAIGKPFDKAGR                        | 187 | 14 | 4 | 30.74 | b5b7b8y7                | 1490.79 | 90.738  | 6622  | 2 | 745.90  | 5.24   |
| [Q8ZKF5]NRFA_SALTY Cytochrome c-552                                | 12 |                                                      | VQNAEGKLYTDHK                         | 289 | 13 | 8 | 43.1  | b3b5*b5b11y5*y5y11*y11  | 1502.74 | 38.886  | 2246  | 2 | 751.88  | -11.05 |
| [Q8ZKF5]NRFA_SALTY Cytochrome c-552                                | 13 |                                                      | DYNKPRGHAYAVTDVR                      | 86  | 16 | 7 | 55.49 | b5b6b10b12y4y6y12       | 1861.91 | 62.255  | 2047  | 4 | 466.23  | -10.75 |
| [Q8ZKF5]NRFA_SALTY Cytochrome c-552                                | 14 | Phosphoryl STY(12)                                   | FFSLIFPFFFITSVYAEQTPESAK              | 10  | 24 | 3 | 22    | b4y11y12                | 2896.37 | 136.439 | 2851  | 2 | 1448.69 | -2.78  |
| [P0A2C7]POTD_SALTY ermidine/putrescine-binding periplasmic protein | 1  |                                                      | EGGIFWMDSLAIPANAK                     | 249 | 17 | 6 | 29.91 | b2b11b12y5y13y17        | 1819.91 | 92.897  | 31441 | 2 | 910.46  | 4.09   |
| [P0A2C7]POTD_SALTY ermidine/putrescine-binding periplasmic protein | 2  |                                                      | LGYSGNTTDPKEIEAA YEELK                | 179 | 21 | 6 | 35.85 | b4*b4b5b6y2y11          | 2328.12 | 49.860  | 12457 | 3 | 776.71  | -1.57  |
| [P0A2C7]POTD_SALTY ermidine/putrescine-binding periplasmic protein | 3  |                                                      | VIYSTYESNETMYAK                       | 53  | 15 | 6 | 36.71 | y2y5y6y10*y10y12        | 1798.83 | 50.357  | 5928  | 2 | 899.92  | 6.99   |
| [P0A2C7]POTD_SALTY ermidine/putrescine-binding periplasmic protein | 4  |                                                      | NSLLLTDDAREVFQMALR                    | 160 | 18 | 6 | 15.58 | b13*b13y3y12*y12*y12    | 2092.06 | 97.554  | 4516  | 3 | 698.02  | -13.65 |
| [P0A2C7]POTD_SALTY ermidine/putrescine-binding periplasmic protein | 5  |                                                      | EGMIQK                                | 92  | 6  | 1 | 13.62 | b5                      | 705.36  | 29.162  | 10636 | 1 | 705.36  | -2.94  |

|                                                                         |    |                      |                                                 |     |    |   |       |                       |         |         |       |   |         |        |
|-------------------------------------------------------------------------|----|----------------------|-------------------------------------------------|-----|----|---|-------|-----------------------|---------|---------|-------|---|---------|--------|
| P0A2C7 POTD_SALTY<br>ermidine/putrescine-binding periplasmic<br>protein | 6  |                      | LTNFHNLDPEMLNKPFDPNNDYS<br>VPYIWGATAIGVNSDAIDPK | 103 | 43 | 4 | 10.99 | b5y3y11*y11           | 4803.31 | 94.199  | 10634 | 4 | 1201.58 | 1.52   |
| P0A2C7 POTD_SALTY<br>ermidine/putrescine-binding periplasmic<br>protein | 7  |                      | TITSWADLWKPEYK                                  | 146 | 14 | 4 | 30.74 | b11y3y9y10            | 1737.85 | 80.539  | 4855  | 2 | 869.43  | -17.28 |
| P0A2C7 POTD_SALTY<br>ermidine/putrescine-binding periplasmic<br>protein | 8  |                      | EVFQMALR                                        | 170 | 8  | 3 | 40.87 | b3b4b6                | 993.54  | 24.140  | 4056  | 3 | 331.85  | 17.57  |
| P0A2C7 POTD_SALTY<br>ermidine/putrescine-binding periplasmic<br>protein | 9  |                      | GEWQNDVGDAIYEEYYQKLK                            | 323 | 22 | 4 | 13.44 | b15y9°y9y21           | 2606.19 | 85.859  | 61419 | 3 | 869.40  | -5.81  |
| P0A2C7 POTD_SALTY<br>ermidine/putrescine-binding periplasmic<br>protein | 10 |                      | VIYSTYESNETMYAKLK                               | 53  | 17 | 7 | 54.63 | b7b8b11y11y12°y12y13  | 2040.01 | 92.978  | 3652  | 3 | 680.68  | 5.86   |
| P0A2C7 POTD_SALTY<br>ermidine/putrescine-binding periplasmic<br>protein | 11 |                      | TITSWADLWKPEYKNSLLLTDDA<br>R                    | 146 | 24 | 3 | 12.71 | b12y3y12              | 2836.43 | 136.430 | 2685  | 2 | 1418.72 | -8.69  |
| P0A2C7 POTD_SALTY<br>ermidine/putrescine-binding periplasmic<br>protein | 12 |                      | KLGYSGNTTDPK                                    | 178 | 12 | 5 | 22.28 | b5b11y11°y11*y11      | 1280.65 | 65.790  | 2077  | 3 | 427.56  | 4.10   |
| P63351 BTUD_SALTY Vitamin B12<br>import ATP-binding protein btuD        | 1  |                      | LGPLSGEVSAGEILHLVGPNGAGK                        | 15  | 24 | 5 | 16.87 | b2b3b12y4y9           | 2272.22 | 85.694  | 27295 | 3 | 758.08  | -5.37  |
| P63351 BTUD_SALTY Vitamin B12<br>import ATP-binding protein btuD        | 2  |                      | MSQLMQLKDVAESTR                                 | 0   | 15 | 5 | 18.14 | b5b11°b11y5°y5        | 1736.85 | 79.126  | 8652  | 2 | 868.93  | -9.42  |
| P63351 BTUD_SALTY Vitamin B12<br>import ATP-binding protein btuD        | 3  |                      | AYLAQQQNPPFAMPVWHYTLH<br>QPKD                   | 75  | 26 | 4 | 12.14 | b10y2y7y10            | 3093.57 | 102.210 | 7163  | 4 | 774.15  | 9.31   |
| P63351 BTUD_SALTY Vitamin B12<br>import ATP-binding protein btuD        | 4  | Carbamidomethyl+C(4) | LIACGRR                                         | 210 | 7  | 3 | 37.46 | b5y3y4                | 845.46  | 29.220  | 1928  | 2 | 423.24  | -15.02 |
| P63351 BTUD_SALTY Vitamin B12<br>import ATP-binding protein btuD        | 5  |                      | SVNQLSGGEWQR                                    | 122 | 12 | 8 | 40.27 | b4°b4y3y4*y4y5°y5*y5  | 1360.65 | 24.933  | 39401 | 2 | 680.83  | -7.54  |
| P63351 BTUD_SALTY Vitamin B12<br>import ATP-binding protein btuD        | 6  | Carbamidomethyl+C(6) | VLHHLQAGIAIVMSSHDLNHTLR                         | 174 | 24 | 5 | 23    | y7*y7y9y10*y10        | 2722.36 | 62.387  | 9701  | 3 | 908.12  | -16.32 |
| P63351 BTUD_SALTY Vitamin B12<br>import ATP-binding protein btuD        | 7  | Carbamidomethyl+C(4) | LIACGR                                          | 210 | 6  | 1 | 13.62 | y5                    | 689.38  | 43.713  | 6635  | 1 | 689.38  | 0.53   |
| P63351 BTUD_SALTY Vitamin B12<br>import ATP-binding protein btuD        | 8  |                      | EEVLTPSYLAQAYGLRFR                              | 217 | 18 | 4 | 22.74 | b6b12b15°b15          | 2113.09 | 99.688  | 19458 | 3 | 705.04  | -6.47  |
| P63351 BTUD_SALTY Vitamin B12<br>import ATP-binding protein btuD        | 9  |                      | RLDVEGHPMLISAT                                  | 235 | 14 | 3 | 24.73 | b6b7y10               | 1538.78 | 67.090  | 13721 | 3 | 513.60  | -11.11 |
| P63351 BTUD_SALTY Vitamin B12<br>import ATP-binding protein btuD        | 10 |                      | TRTQQLNEVADMLGLGDK                              | 101 | 18 | 7 | 32.75 | b9b10°b10b13°b13y5y14 | 1918.00 | 72.821  | 3472  | 3 | 640.00  | 14.51  |
| P63351 BTUD_SALTY Vitamin B12<br>import ATP-binding protein btuD        | 11 | Phosphoryl STY(6)    | REEVLTPSYLAQAYGLR                               | 216 | 17 | 6 | 22.93 | b10b13y10y13°y13*y13  | 2046.02 | 78.547  | 4822  | 4 | 512.26  | 13.13  |
| P63351 BTUD_SALTY Vitamin B12<br>import ATP-binding protein btuD        | 12 | Oxidation+M(4)       | SQLMQLKDVAESTR                                  | 1   | 14 | 3 | 19.29 | b3b6y11               | 1621.81 | 63.861  | 6823  | 2 | 811.41  | -7.38  |
| P65215 KDSA_SALTY 2-dehydro-3-<br>deoxyphosphooctonate aldolase         | 1  |                      | AGMAVGLAGLFLESHDPANAK                           | 226 | 22 | 5 | 35.67 | b3b4y1y17y18          | 2166.10 | 87.452  | 26211 | 3 | 722.70  | -0.79  |

|                                                            |    |                       |                                         |     |    |    |       |                                        |         |         |       |   |         |        |
|------------------------------------------------------------|----|-----------------------|-----------------------------------------|-----|----|----|-------|----------------------------------------|---------|---------|-------|---|---------|--------|
| [P65215]KDSA_SALTY 2-dehydro-3-deoxyphohooctonate aldolase | 2  |                       | VANDLPFVFLGGMNVLESR                     | 12  | 19 | 9  | 33.35 | b2b5y2y7°y7y9y10y14y19                 | 2078.08 | 109.671 | 19464 | 2 | 1039.54 | 3.64   |
| [P65215]KDSA_SALTY 2-dehydro-3-deoxyphohooctonate aldolase | 3  | Carbamidomethyl+C(17) | VSGNSPVIFDVTHALQCR                      | 189 | 18 | 5  | 21.75 | b5b12°b12y10y17                        | 1999.99 | 78.484  | 12577 | 3 | 667.33  | -6.41  |
| [P65215]KDSA_SALTY 2-dehydro-3-deoxyphohooctonate aldolase | 4  | Carbamidomethyl+C(17) | VSGNSPVIFDVTHALQCRDPFGAA<br>SGGR        | 189 | 28 | 4  | 35.74 | b5°b5b6b7                              | 2915.41 | 84.747  | 5946  | 4 | 729.61  | -2.76  |
| [P65215]KDSA_SALTY 2-dehydro-3-deoxyphohooctonate aldolase | 5  |                       | DLAMR                                   | 31  | 5  | 1  | 13.22 | y4                                     | 605.30  | 41.055  | 20777 | 1 | 605.30  | -10.18 |
| [P65215]KDSA_SALTY 2-dehydro-3-deoxyphohooctonate aldolase | 6  | Carbamidomethyl+C(4)  | VILCDR                                  | 162 | 6  | 1  | 13.62 | y4                                     | 775.40  | 27.278  | 6621  | 1 | 775.40  | -11.26 |
| [P65215]KDSA_SALTY 2-dehydro-3-deoxyphohooctonate aldolase | 7  |                       | VITDVHEASQAQPVADVVDVIQL<br>PAFLAR       | 91  | 29 | 8  | 28.98 | b6b9b10b12°b12*b12y6y8                 | 3101.63 | 103.905 | 5228  | 4 | 776.16  | -12.20 |
| [P65215]KDSA_SALTY 2-dehydro-3-deoxyphohooctonate aldolase | 8  | Carbamidomethyl+C(1)  | CDGPSALPLAK                             | 248 | 11 | 4  | 31.29 | b4b9°b9b10                             | 1128.56 | 99.347  | 4170  | 1 | 1128.56 | -10.06 |
| [P65215]KDSA_SALTY 2-dehydro-3-deoxyphohooctonate aldolase | 9  |                       | KPQFVSPGQMGNIVDKFHEGGND<br>K            | 138 | 24 | 4  | 22    | b11b12°b12y8                           | 2629.25 | 58.509  | 5423  | 3 | 877.09  | -11.61 |
| [P65215]KDSA_SALTY 2-dehydro-3-deoxyphohooctonate aldolase | 10 |                       | GQVTELARAGMAVGLAGLFLESH<br>PDPANAK      | 218 | 30 | 5  | 11.38 | b4°b4*b4y3y6                           | 3020.53 | 110.634 | 2231  | 3 | 1007.51 | -11.48 |
| [P65215]KDSA_SALTY 2-dehydro-3-deoxyphohooctonate aldolase | 11 |                       | AIDDLVKSFDELDTEN                        | 268 | 16 | 3  | 23.69 | b11y9y10                               | 1823.85 | 38.802  | 1578  | 2 | 912.43  | -1.47  |
| [P65215]KDSA_SALTY 2-dehydro-3-deoxyphohooctonate aldolase | 12 | Oxidation+M(10)       | KPQFVSPGQMGNIVDK                        | 138 | 16 | 5  | 17.16 | b8y10°y10y13*y13                       | 1760.88 | 76.717  | 6581  | 2 | 880.94  | -13.17 |
| [P65215]KDSA_SALTY 2-dehydro-3-deoxyphohooctonate aldolase | 13 | Oxidation+M(19)       | GANFGYDNLVVDMLGFSVMKK                   | 168 | 21 | 3  | 13.88 | b5b13y5                                | 2321.13 | 80.918  | 2255  | 3 | 774.38  | -0.32  |
| [P65215]KDSA_SALTY 2-dehydro-3-deoxyphohooctonate aldolase | 14 | Oxidation+M(3)        | AGMAVGLAGLFLESHDPANAK                   | 226 | 22 | 4  | 13.44 | b11y8y21*y21                           | 2182.11 | 117.967 | 1695  | 2 | 1091.56 | 4.36   |
| [Q8ZL56]GPMI_SALTY 2                                       | 1  |                       | TFFANPVLTAVDQAK                         | 91  | 16 | 6  | 24.26 | b1b3b5y4y11y16                         | 1735.90 | 75.753  | 33762 | 2 | 868.45  | 0.21   |
| [Q8ZL56]GPMI_SALTY 2                                       | 2  | Carbamidomethyl+C(8)  | AVEALDNCIEQVTK                          | 416 | 14 | 7  | 39.04 | b6b13y6*y6y7y9y14                      | 1589.79 | 60.150  | 17272 | 2 | 795.40  | 5.30   |
| [Q8ZL56]GPMI_SALTY 2                                       | 3  |                       | TPVMDALWAK                              | 31  | 10 | 3  | 14.48 | b5°b5y8                                | 1131.59 | 70.579  | 15361 | 2 | 566.30  | 3.45   |
| [Q8ZL56]GPMI_SALTY 2                                       | 4  |                       | LSDIAPTMSLMGMEIPQEMTGKP<br>LFIVE        | 485 | 29 | 13 | 49.42 | b2b3b4b5°b5b12°b12b13y<br>1y2°y2y13y29 | 3191.62 | 120.695 | 14115 | 3 | 1064.54 | 1.84   |
| [Q8ZL56]GPMI_SALTY 2                                       | 5  |                       | AVESVGGQLLITADHGNAEQMR                  | 430 | 22 | 7  | 35.02 | b3b6y3y5y12y13*y13                     | 2296.15 | 81.600  | 9709  | 3 | 766.05  | 6.27   |
| [Q8ZL56]GPMI_SALTY 2                                       | 6  |                       | IVYQDLTR                                | 75  | 8  | 5  | 40.87 | y3y5y6y8*y8                            | 1007.55 | 45.297  | 7104  | 2 | 504.28  | -1.88  |
| [Q8ZL56]GPMI_SALTY 2                                       | 7  |                       | AFVNADFDGFARK                           | 272 | 13 | 6  | 29.67 | b6°b6b10y6y10y13                       | 1457.72 | 55.495  | 4085  | 2 | 729.36  | 2.18   |
| [Q8ZL56]GPMI_SALTY 2                                       | 8  |                       | YAHVTFFFNGGVVEPFAGEER                   | 336 | 21 | 3  | 23.53 | b3b4b12                                | 2403.13 | 94.472  | 3056  | 3 | 801.71  | 10.36  |
| [Q8ZL56]GPMI_SALTY 2                                       | 9  |                       | FAALGK                                  | 172 | 6  | 2  | 26.85 | y3y4                                   | 606.35  | 39.615  | 30282 | 1 | 606.35  | -10.17 |
| [Q8ZL56]GPMI_SALTY 2                                       | 10 |                       | VATYDLQPEMSSAELTEK                      | 364 | 18 | 8  | 61.82 | b9b10b11*b11y9y11y12y1<br>7            | 2011.99 | 62.124  | 19659 | 2 | 1006.50 | 17.84  |
| [Q8ZL56]GPMI_SALTY 2                                       | 11 |                       | IYLHAFLDGR                              | 145 | 10 | 3  | 26.91 | b4y3y8                                 | 1204.66 | 52.042  | 14652 | 2 | 602.83  | 9.83   |
| [Q8ZL56]GPMI_SALTY 2                                       | 12 |                       | AFVNADFDGFGAR                           | 272 | 12 | 5  | 52.7  | b11y4y5y9y10                           | 1329.65 | 70.490  | 12654 | 2 | 665.33  | 18.64  |
| [Q8ZL56]GPMI_SALTY 2                                       | 13 |                       | DPATGQAHTAHTNLPVPLIYVGE<br>K            | 452 | 24 | 4  | 12.71 | b8b11y5°y5                             | 2529.26 | 46.315  | 12266 | 3 | 843.76  | -18.05 |
| [Q8ZL56]GPMI_SALTY 2                                       | 14 |                       | TAVAYPPASLANTFGEWMAK                    | 303 | 20 | 4  | 22.5  | b14°b14y9y10                           | 2125.06 | 95.016  | 11395 | 2 | 1063.04 | 10.11  |
| [Q8ZL56]GPMI_SALTY 2                                       | 15 |                       | LDVEIK                                  | 83  | 6  | 1  | 13.62 | y3                                     | 716.41  | 35.332  | 4964  | 1 | 716.41  | -13.80 |
| [Q8ZL56]GPMI_SALTY 2                                       | 16 |                       | TAVAYPPASLANTFGEWMAKND<br>K             | 303 | 23 | 10 | 51.45 | b11°b11y7y8°y8y9y11y12°<br>y12*y12     | 2482.23 | 68.162  | 64867 | 3 | 828.08  | 8.16   |
| [Q8ZL56]GPMI_SALTY 2                                       | 17 |                       | DPATGQAHTAHTNLPVPLIYVGE<br>KNVK         | 452 | 27 | 5  | 22.55 | b7°b7b9b10y3                           | 2870.50 | 109.480 | 51038 | 3 | 957.50  | -6.89  |
| [Q8ZL56]GPMI_SALTY 2                                       | 18 |                       | EEQQDNAILNAKTPVMDALWAK                  | 19  | 22 | 4  | 13.44 | b13y7y13*y13                           | 2485.25 | 80.745  | 6816  | 2 | 1243.13 | 2.85   |
| [Q8ZL56]GPMI_SALTY 2                                       | 19 | Oxidation+M(3)        | KPMVLVILDGYGYR                          | 5   | 14 | 3  | 27.86 | y5y7y10                                | 1639.87 | 73.254  | 20155 | 3 | 547.29  | -10.57 |
| [Q8ZL56]GPMI_SALTY 2                                       | 20 | Oxidation+M(5)        | AYDLMTLAQGEFQADTAVAGLQ<br>AAYARDENDEFVK | 202 | 35 | 4  | 21.45 | b7b8b20y9                              | 3837.83 | 90.135  | 14350 | 3 | 1279.95 | 8.91   |
| [Q8ZL56]GPMI_SALTY 2                                       | 21 | Oxidation+M(1)        | MSVSKKPMVLVILDGYGYR                     | 0   | 19 | 4  | 14.94 | b5°b5y5y7                              | 2172.14 | 78.375  | 2057  | 3 | 724.72  | -7.98  |
| [Q8ZL56]GPMI_SALTY 2                                       | 22 | Carbamidomethyl+C(1)  | CIEQVTK                                 | 423 | 7  | 1  | 7.32  | b3                                     | 877.45  | 60.116  | 4501  | 1 | 877.45  | 6.61   |

|                                                                                         |    |                       |                                     |     |    |    |       |                                  |         |         |       |   |         |        |
|-----------------------------------------------------------------------------------------|----|-----------------------|-------------------------------------|-----|----|----|-------|----------------------------------|---------|---------|-------|---|---------|--------|
| Q9L6N1 METE_SALTY 5-methyltetrahydropteroyltriglutamate--homocysteine methyltransferase | 1  | Carbamidomethyl+C(7)  | LWVNPDCGLK                          | 719 | 10 | 9  | 74.35 | b2b3b10y4y5y6y7y8y10             | 1201.60 | 59.471  | 46168 | 2 | 601.31  | 0.20   |
| Q9L6N1 METE_SALTY 5-methyltetrahydropteroyltriglutamate--homocysteine methyltransferase | 2  |                       | WFNTNYHYIVPEFSK                     | 117 | 15 | 6  | 43.7  | y5y6y12°y12y13y15                | 1944.92 | 77.262  | 38811 | 3 | 648.98  | -3.70  |
| Q9L6N1 METE_SALTY 5-methyltetrahydropteroyltriglutamate--homocysteine methyltransferase | 3  |                       | QAGIDLLPVGDFAWYDHLVLTSL<br>LLGNVPAR | 52  | 31 | 11 | 38.6  | b5*b5b6°b6*b6b31y3y6y7<br>y24y31 | 3351.79 | 118.864 | 28489 | 3 | 1117.94 | 6.12   |
| Q9L6N1 METE_SALTY 5-methyltetrahydropteroyltriglutamate--homocysteine methyltransferase | 4  |                       | LTWTQLLEEVDEALALGHK                 | 137 | 19 | 8  | 20.7  | b5°b5b11°b11y1y3y12y19           | 2166.12 | 118.525 | 26778 | 3 | 722.71  | -8.90  |
| Q9L6N1 METE_SALTY 5-methyltetrahydropteroyltriglutamate--homocysteine methyltransferase | 5  |                       | LAAITAQDSQRENPYEV                   | 395 | 18 | 7  | 50.22 | b2b3y2y13y14y15y16               | 2061.02 | 46.250  | 25720 | 3 | 687.68  | -6.04  |
| Q9L6N1 METE_SALTY 5-methyltetrahydropteroyltriglutamate--homocysteine methyltransferase | 6  |                       | SWFAFALQK                           | 343 | 9  | 7  | 53.25 | b3b5b7°b7y1y7y9                  | 1097.56 | 84.685  | 25410 | 2 | 549.29  | -13.79 |
| Q9L6N1 METE_SALTY 5-methyltetrahydropteroyltriglutamate--homocysteine methyltransferase | 7  | Carbamidomethyl+C(1)  | CVKPPVVIGDISRPAPITVEWAK             | 515 | 23 | 6  | 23.14 | b2b4b6b7y2y23                    | 2532.41 | 74.895  | 22870 | 3 | 844.81  | 2.22   |
| Q9L6N1 METE_SALTY 5-methyltetrahydropteroyltriglutamate--homocysteine methyltransferase | 8  |                       | DALNSGETAALKEEWSAPIQAR              | 360 | 21 | 6  | 24.71 | b3°b3b12b13°b13y7                | 2229.11 | 79.259  | 21616 | 2 | 1115.06 | 13.25  |
| Q9L6N1 METE_SALTY 5-methyltetrahydropteroyltriglutamate--homocysteine methyltransferase | 9  |                       | LAAITAQDSQR                         | 395 | 11 | 9  | 90.2  | b2b3y3y5y6y7y8y10y11             | 1173.62 | 33.052  | 15518 | 2 | 587.31  | -1.46  |
| Q9L6N1 METE_SALTY 5-methyltetrahydropteroyltriglutamate--homocysteine methyltransferase | 10 | Carbamidomethyl+C(11) | GMLTGPVTILCWSFPREDVTR               | 549 | 21 | 4  | 20.52 | y7y10y17y21                      | 2435.22 | 91.960  | 2952  | 3 | 812.41  | -0.90  |
| Q9L6N1 METE_SALTY 5-methyltetrahydropteroyltriglutamate--homocysteine methyltransferase | 11 | Carbamidomethyl+C(8)  | ALWVASSCSLLHSPIDLSVETR              | 315 | 22 | 3  | 19.95 | b3b7b14                          | 2441.24 | 102.799 | 43309 | 4 | 611.07  | -2.30  |
| Q9L6N1 METE_SALTY 5-methyltetrahydropteroyltriglutamate--homocysteine methyltransferase | 12 |                       | LPVDWLLSAGLINGR                     | 279 | 15 | 3  | 18.14 | b6y3y12                          | 1623.93 | 100.798 | 20684 | 2 | 812.47  | 2.41   |
| Q9L6N1 METE_SALTY 5-methyltetrahydropteroyltriglutamate--homocysteine methyltransferase | 13 |                       | HQNNDGSVDIDLFR                      | 83  | 15 | 3  | 18.14 | b8b11y7                          | 1730.83 | 68.931  | 14699 | 2 | 865.92  | 14.18  |
| Q9L6N1 METE_SALTY 5-methyltetrahydropteroyltriglutamate--homocysteine methyltransferase | 14 |                       | AQESYWAGNTTR                        | 21  | 12 | 3  | 26.26 | b8b9y5                           | 1383.63 | 39.582  | 11424 | 2 | 692.32  | 3.09   |
| Q9L6N1 METE_SALTY 5-methyltetrahydropteroyltriglutamate--homocysteine methyltransferase | 15 |                       | ETIAK                               | 570 | 5  | 1  | 13.22 | b3                               | 561.32  | 27.369  | 10065 | 1 | 561.32  | -5.65  |
| Q9L6N1 METE_SALTY 5-methyltetrahydropteroyltriglutamate--homocysteine methyltransferase | 16 |                       | GQQFR                               | 132 | 5  | 1  | 13.22 | y3                               | 635.32  | 40.689  | 5966  | 1 | 635.32  | -5.67  |
| Q9L6N1 METE_SALTY 5-methyltetrahydropteroyltriglutamate--homocysteine methyltransferase | 17 |                       | NDMVEYFGEHLDFVFTQNGWV<br>QSYGSR     | 487 | 28 | 6  | 22.33 | b4y5y8y9°y9*y9                   | 3282.50 | 93.035  | 3079  | 3 | 1094.84 | 13.39  |
| Q9L6N1 METE_SALTY 5-methyltetrahydropteroyltriglutamate--homocysteine methyltransferase | 18 | Carbamidomethyl+C(11) | GMLTGPVTILCWSFPR                    | 549 | 16 | 4  | 25.53 | y8y10°y10y11                     | 1834.90 | 83.626  | 3037  | 3 | 612.30  | -20.69 |
| Q9L6N1 METE_SALTY 5-methyltetrahydropteroyltriglutamate--homocysteine methyltransferase | 19 |                       | GWPETR                              | 731 | 6  | 3  | 29.86 | y3°y3y5                          | 745.36  | 78.160  | 1784  | 1 | 745.36  | -3.11  |

|                                                                                         |    |                                             |                                          |      |    |    |       |                                |         |         |        |   |         |        |
|-----------------------------------------------------------------------------------------|----|---------------------------------------------|------------------------------------------|------|----|----|-------|--------------------------------|---------|---------|--------|---|---------|--------|
| Q9L6N1 METE_SALTY 5-methyltetrahydropteroyltriglutamate--homocysteine methyltransferase | 20 |                                             | FKLPAWPTTTIGSFPQTTEIR                    | 420  | 21 | 3  | 22.33 | b14y6y7                        | 2391.27 | 87.286  | 42714  | 3 | 797.76  | -1.43  |
| Q9L6N1 METE_SALTY 5-methyltetrahydropteroyltriglutamate--homocysteine methyltransferase | 21 | Carbamidomethyl+C(11)                       | GMLTGPVTILCWSFPREDVTR                    | 549  | 21 | 3  | 20.52 | y3y6y16                        | 2435.22 | 96.918  | 20917  | 3 | 812.41  | -1.50  |
| Q9L6N1 METE_SALTY 5-methyltetrahydropteroyltriglutamate--homocysteine methyltransferase | 22 |                                             | GNLDANHYRTGIAEHK                         | 449  | 17 | 3  | 24.97 | b7b10b11                       | 1908.95 | 74.472  | 3789   | 2 | 954.98  | -8.19  |
| Q9L6N1 METE_SALTY 5-methyltetrahydropteroyltriglutamate--homocysteine methyltransferase | 23 |                                             | LAAITAQDSQRENPYEVR                       | 395  | 18 | 3  | 15.58 | b13y6y10                       | 2061.02 | 95.772  | 1855   | 2 | 1031.01 | -6.52  |
| Q9L6N1 METE_SALTY 5-methyltetrahydropteroyltriglutamate--homocysteine methyltransferase | 24 | Oxidation+M(12)                             | APTGEPAAAAEMTK                           | 103  | 14 | 6  | 48.44 | b8y4y8°y8y11y13                | 1360.65 | 56.558  | 28828  | 2 | 680.83  | 4.49   |
| P0A275 MUCA_SALTY Protein mucA                                                          | 1  | Carbamidomethyl+C(13)                       | SLTASHGSIVVACIHNEFTVK                    | 78   | 21 | 11 | 36.24 | b2°b2b8°b8b13y8y9y13°y13y19y21 | 2270.15 | 76.239  | 58335  | 3 | 757.39  | -2.26  |
| P0A275 MUCA_SALTY Protein mucA                                                          | 2  |                                             | VDIFESSGASR                              | 2    | 11 | 6  | 55.97 | b6b7b8b9y6°y6                  | 1167.57 | 37.843  | 4100   | 2 | 584.29  | 1.57   |
| P0A275 MUCA_SALTY Protein mucA                                                          | 3  |                                             | HPSATYFLR                                | 48   | 9  | 3  | 30.49 | b5b8y6                         | 1091.55 | 83.481  | 19698  | 2 | 546.28  | -9.06  |
| P0A275 MUCA_SALTY Protein mucA                                                          | 4  |                                             | HPSATYFLRVSGSSMEDGR                      | 48   | 19 | 3  | 14.94 | b4b8y11                        | 2096.96 | 70.582  | 5215   | 3 | 699.66  | -11.06 |
| P0A275 MUCA_SALTY Protein mucA                                                          | 5  | Carbamidomethyl+C(13)<br>;Phosphoryl STY(8) | SLTASHGSIVVACIHNEFTVK                    | 78   | 21 | 3  | 22.33 | b6b7y9                         | 2350.12 | 102.195 | 1528   | 2 | 1175.57 | 3.22   |
| P06173 RPOB_SALTY DNA-directed RNA polymerase subunit beta                              | 1  |                                             | EAPEGTVKDIKEQEVYMGEIPLMT<br>DNGTFVINGTER | 107  | 36 | 10 | 34.2  | b3b9b10b12b17y1y3y9y14<br>y36  | 4010.89 | 93.923  | 101004 | 4 | 1003.48 | -12.11 |
| P06173 RPOB_SALTY DNA-directed RNA polymerase subunit beta                              | 2  |                                             | SVFPIQSYSGNSELQYVSyr                     | 54   | 20 | 5  | 22.62 | b12*b12y11y14y16               | 2324.15 | 56.748  | 19392  | 3 | 775.39  | 12.92  |
| P06173 RPOB_SALTY DNA-directed RNA polymerase subunit beta                              | 3  |                                             | LSLGDLDTLMPQDMINAKPISAAV<br>K            | 478  | 25 | 4  | 22.89 | b10b11b24y25                   | 2641.39 | 92.531  | 14953  | 3 | 881.13  | -2.22  |
| P06173 RPOB_SALTY DNA-directed RNA polymerase subunit beta                              | 4  |                                             | NIVDGNHQMEPGMPESFNVLLK                   | 1306 | 22 | 7  | 49.21 | b10b11°b11b12b13y2y12          | 2469.19 | 79.933  | 11714  | 3 | 823.74  | 0.99   |
| P06173 RPOB_SALTY DNA-directed RNA polymerase subunit beta                              | 5  |                                             | MNIGQILETHLGMAAK                         | 1106 | 16 | 3  | 24.86 | b6b8b14                        | 1726.91 | 71.273  | 10273  | 2 | 863.96  | 6.72   |
| P06173 RPOB_SALTY DNA-directed RNA polymerase subunit beta                              | 6  |                                             | ADKPLVGTGMER                             | 694  | 12 | 6  | 32.19 | b4b6y2y3y9y12                  | 1273.64 | 51.911  | 9515   | 2 | 637.33  | -10.06 |
| P06173 RPOB_SALTY DNA-directed RNA polymerase subunit beta                              | 7  |                                             | KDLSEELQILEAGLFSR                        | 957  | 17 | 3  | 9.71  | b5°b5y7                        | 1948.04 | 82.576  | 7765   | 2 | 974.52  | -1.75  |
| P06173 RPOB_SALTY DNA-directed RNA polymerase subunit beta                              | 8  |                                             | FIEQDPEGQYGLEAAFR                        | 37   | 17 | 5  | 16.32 | b4b13y1y2y12                   | 1969.94 | 107.026 | 7051   | 3 | 657.32  | 4.40   |
| P06173 RPOB_SALTY DNA-directed RNA polymerase subunit beta                              | 9  |                                             | EFFGSSQLSQFMDQNNPLSEITHK<br>R            | 503  | 25 | 3  | 22.89 | y10y11y13                      | 2940.37 | 71.635  | 6804   | 4 | 735.85  | -7.06  |
| P06173 RPOB_SALTY DNA-directed RNA polymerase subunit beta                              | 10 |                                             | VNEDEMYPGEAGIDIYNLTk                     | 735  | 20 | 3  | 14.37 | b10b13y14                      | 2271.03 | 65.623  | 6221   | 3 | 757.68  | -6.77  |
| P06173 RPOB_SALTY DNA-directed RNA polymerase subunit beta                              | 11 | Carbamidomethyl+C(11)                       | LGEPVFDVQECQIR                           | 74   | 14 | 3  | 19.29 | b7b10y6                        | 1689.82 | 65.962  | 6118   | 2 | 845.41  | -3.40  |

|                                                             |    |                       |                               |      |    |   |       |                  |         |         |       |   |         |        |
|-------------------------------------------------------------|----|-----------------------|-------------------------------|------|----|---|-------|------------------|---------|---------|-------|---|---------|--------|
| [P06173]RPOB_SALTY DNA-directed RNA polymerase subunit beta | 12 |                       | INPIEDMPYDENGTPVDIVLNPLG VPSR | 1078 | 28 | 4 | 17.72 | b1y3y5y7         | 3064.56 | 97.458  | 5444  | 3 | 1022.19 | 8.52   |
| [P06173]RPOB_SALTY DNA-directed RNA polymerase subunit beta | 13 |                       | VDLSTFSDDDEVLR                | 1158 | 13 | 5 | 20.64 | b3b13y9y12y13    | 1495.71 | 67.570  | 4480  | 3 | 499.24  | -8.65  |
| [P06173]RPOB_SALTY DNA-directed RNA polymerase subunit beta | 14 |                       | DLSEELQILEAGLFSR              | 958  | 16 | 5 | 28.34 | b7b8b13y3°y3     | 1819.92 | 81.884  | 1881  | 2 | 910.46  | -12.01 |
| [P06173]RPOB_SALTY DNA-directed RNA polymerase subunit beta | 15 | Carbamidomethyl+C(11) | FTTIHIQELACVSRDTK             | 827  | 17 | 6 | 23.31 | b1b2b8y8y9y17    | 2019.04 | 50.286  | 1598  | 3 | 673.68  | 2.24   |
| [P06173]RPOB_SALTY DNA-directed RNA polymerase subunit beta | 16 |                       | IQPGDK                        | 1059 | 6  | 4 | 26.85 | b5°b5*b5y3       | 657.35  | 43.552  | 65544 | 1 | 657.35  | -4.64  |
| [P06173]RPOB_SALTY DNA-directed RNA polymerase subunit beta | 17 |                       | LGDLPTSGQITLFDGR              | 1200 | 16 | 3 | 17.16 | b9b12y4          | 1689.88 | 66.420  | 24010 | 2 | 845.44  | -1.73  |
| [P06173]RPOB_SALTY DNA-directed RNA polymerase subunit beta | 18 |                       | LSQSGHK                       | 324  | 7  | 5 | 37.46 | b3y5*y5y6*y6     | 756.40  | 98.080  | 19202 | 1 | 756.40  | -4.12  |
| [P06173]RPOB_SALTY DNA-directed RNA polymerase subunit beta | 19 |                       | WLELGLTDEEK                   | 996  | 11 | 4 | 24.31 | b3y6y9°y9        | 1332.66 | 49.614  | 9509  | 2 | 666.83  | -7.14  |
| [P06173]RPOB_SALTY DNA-directed RNA polymerase subunit beta | 20 |                       | MMRPGEPPTR                    | 368  | 10 | 4 | 28.67 | b5y8y9°y9        | 1171.58 | 50.384  | 8622  | 2 | 586.30  | 10.63  |
| [P06173]RPOB_SALTY DNA-directed RNA polymerase subunit beta | 21 |                       | EFFGSSQLSQFMDQNNPLSEITHK      | 503  | 24 | 5 | 28.31 | b3b9°b9b11b12    | 2784.29 | 95.139  | 7445  | 3 | 928.77  | -1.32  |
| [P06173]RPOB_SALTY DNA-directed RNA polymerase subunit beta | 22 |                       | GETQLTPEEK                    | 890  | 10 | 4 | 26.91 | b5*b5y3y5        | 1131.58 | 25.950  | 6067  | 2 | 566.29  | 20.28  |
| [P06173]RPOB_SALTY DNA-directed RNA polymerase subunit beta | 23 |                       | STGSYSLVTTQQLGGK              | 1246 | 16 | 5 | 17.16 | b3b12°b12*b12y13 | 1622.81 | 67.615  | 5663  | 3 | 541.61  | -19.18 |
| [P06173]RPOB_SALTY DNA-directed RNA polymerase subunit beta | 24 |                       | GSWLDFEFDPK                   | 180  | 11 | 4 | 35.31 | b4b6y4y9         | 1340.64 | 46.370  | 5459  | 2 | 670.82  | 17.94  |
| [P06173]RPOB_SALTY DNA-directed RNA polymerase subunit beta | 25 |                       | ASDVK                         | 909  | 5  | 2 | 13.22 | b3°b3            | 519.27  | 63.982  | 4823  | 1 | 519.27  | -8.23  |
| [P06173]RPOB_SALTY DNA-directed RNA polymerase subunit beta | 26 |                       | GDVLADGPSTDLGELALGQNMR        | 779  | 22 | 3 | 34.77 | b8b9b10          | 2229.11 | 77.763  | 3263  | 3 | 743.71  | 12.92  |
| [P06173]RPOB_SALTY DNA-directed RNA polymerase subunit beta | 27 | Carbamidomethyl+C(11) | FTTIHIQELACVSR                | 827  | 14 | 4 | 27.07 | b7°b7b9b10       | 1674.87 | 63.420  | 2960  | 3 | 558.96  | 1.53   |
| [P06173]RPOB_SALTY DNA-directed RNA polymerase subunit beta | 28 |                       | DVHPHYGR                      | 548  | 9  | 3 | 30.49 | b7y4y5           | 1081.53 | 73.745  | 2903  | 2 | 541.27  | 7.22   |
| [P06173]RPOB_SALTY DNA-directed RNA polymerase subunit beta | 29 |                       | VTPK                          | 886  | 4  | 1 | 12.82 | y3               | 444.28  | 103.113 | 2680  | 1 | 444.28  | -12.23 |
| [P06173]RPOB_SALTY DNA-directed RNA polymerase subunit beta | 30 |                       | QNQLEQLAEQYDELK               | 1007 | 15 | 3 | 26.22 | b3b4b6           | 1848.89 | 58.400  | 2635  | 2 | 924.95  | -3.57  |

|                                                            |    |                       |                              |      |    |   |       |                |         |         |       |   |         |        |
|------------------------------------------------------------|----|-----------------------|------------------------------|------|----|---|-------|----------------|---------|---------|-------|---|---------|--------|
| P06173 RPOB_SALTY DNA-directed RNA polymerase subunit beta | 31 |                       | FGEMEVWALEAYGAAYTLQEML TVK   | 1269 | 25 | 5 | 27    | b11b13y6y13y14 | 2850.36 | 82.736  | 2555  | 3 | 950.79  | -3.68  |
| P06173 RPOB_SALTY DNA-directed RNA polymerase subunit beta | 32 |                       | SPGVFFDS DK                  | 151  | 10 | 6 | 40.13 | b8°b8y3°y3y4y7 | 1098.53 | 93.992  | 1595  | 1 | 1098.53 | 18.00  |
| P06173 RPOB_SALTY DNA-directed RNA polymerase subunit beta | 33 |                       | GMPIATPVFDGAKEAEIK           | 1178 | 18 | 5 | 38.59 | b4b5b6°b6b13   | 1873.95 | 51.317  | 83678 | 3 | 625.32  | -11.33 |
| P06173 RPOB_SALTY DNA-directed RNA polymerase subunit beta | 34 | Carbamidomethyl+C(17) | VVQEDRFTTIIHQELACVSR         | 821  | 20 | 3 | 14.37 | b3b11y11       | 2401.21 | 73.367  | 16901 | 2 | 1201.11 | -8.64  |
| P06173 RPOB_SALTY DNA-directed RNA polymerase subunit beta | 35 |                       | INAMLKQQQEVAK                | 1127 | 13 | 5 | 43.1  | b4b12y4y7y12   | 1500.80 | 70.539  | 9524  | 2 | 750.90  | -13.75 |
| P06173 RPOB_SALTY DNA-directed RNA polymerase subunit beta | 36 |                       | VDLSTFSDDDEVLR LAENLR        | 1158 | 19 | 3 | 21.9  | b3b7b13        | 2192.15 | 72.392  | 9193  | 2 | 1096.58 | 11.69  |
| P06173 RPOB_SALTY DNA-directed RNA polymerase subunit beta | 37 |                       | EAAESLFENLFFSEDRYDLSAVGR     | 378  | 24 | 4 | 16.87 | b7b13y12y19    | 2765.32 | 74.235  | 5626  | 4 | 692.09  | 4.77   |
| P06173 RPOB_SALTY DNA-directed RNA polymerase subunit beta | 38 |                       | VIVSQLHRSPGVFFDS DK          | 143  | 18 | 3 | 24.5  | y9y12y13       | 2031.08 | 82.752  | 3183  | 2 | 1016.05 | 9.20   |
| P06173 RPOB_SALTY DNA-directed RNA polymerase subunit beta | 39 |                       | QKVDLSTFSDDDEVLR             | 1156 | 15 | 3 | 26.22 | y7y10y14       | 1751.87 | 63.906  | 3064  | 2 | 876.44  | -7.80  |
| P06173 RPOB_SALTY DNA-directed RNA polymerase subunit beta | 40 |                       | AGFEVRDVHPH YGR              | 542  | 15 | 4 | 29.44 | b3y3y4y6       | 1740.87 | 58.355  | 2926  | 2 | 870.94  | 10.52  |
| P06173 RPOB_SALTY DNA-directed RNA polymerase subunit beta | 41 |                       | EFIQRAYDLGADV R              | 1142 | 14 | 3 | 19.29 | b4b11y11       | 1652.83 | 51.235  | 2462  | 3 | 551.61  | -7.16  |
| P06173 RPOB_SALTY DNA-directed RNA polymerase subunit beta | 42 |                       | KGMPIATPVFDGAK               | 1177 | 14 | 3 | 27.07 | b6b11b12       | 1431.78 | 76.254  | 2344  | 2 | 716.39  | 9.46   |
| P06173 RPOB_SALTY DNA-directed RNA polymerase subunit beta | 43 |                       | MVYSYTEKK                    | 0    | 9  | 3 | 30.49 | b3b4y8         | 1148.58 | 81.648  | 2103  | 1 | 1148.58 | 10.20  |
| P06173 RPOB_SALTY DNA-directed RNA polymerase subunit beta | 44 |                       | VAFMPWNGYNFEDSILVSE RVVQ EDR | 801  | 26 | 4 | 35.36 | b7b8b9y7       | 3100.53 | 69.835  | 1852  | 3 | 1034.18 | 14.80  |
| P06173 RPOB_SALTY DNA-directed RNA polymerase subunit beta | 45 | Carbamidomethyl+C(11) | FTTIIHQELACVSRDTK            | 827  | 17 | 5 | 33.72 | y4y6y9y10°y10  | 2019.02 | 101.205 | 1771  | 2 | 1010.01 | -6.65  |
| P06173 RPOB_SALTY DNA-directed RNA polymerase subunit beta | 46 |                       | MNIGQILETHLGMAAKGIGDK        | 1106 | 21 | 3 | 20.52 | b3b5b12        | 2197.12 | 102.650 | 1579  | 4 | 550.04  | -11.22 |
| P06173 RPOB_SALTY DNA-directed RNA polymerase subunit beta | 47 | Oxidation+M(7)        | ALEIEEMQLK                   | 944  | 10 | 4 | 40.13 | b3y5y7y8       | 1219.63 | 65.203  | 14756 | 2 | 610.32  | 4.30   |
