# Supplementary material for: Phenotypic profile linked to inhibition of the major Zn influx system in Salmonella enterica : proteomics and ionomics investigations
Source: Royal Society of Chemistry journal article supplement (doi:10.1039/c0mb00140f), 2010-10-20
Supplement: c0mb00140f.zip [file c0mb00140f.zip]

MA6926 + Zn(II) LC-MS run 2: 6926\_Zn\_220709\_1a2\_02

| Protein name                                   | Peptide Rank | Peptide Modification | Peptide Sequence                | Peptide sequence start | Peptide sequence Length | Peptide Matched Products | Peptide Score | By Matches                                                                                                          | Precursor MH+ (Da) | Retention time (min) | Intensity | z | Precursor m/z | MH+ Error (ppm) |
|------------------------------------------------|--------------|----------------------|---------------------------------|------------------------|-------------------------|--------------------------|---------------|---------------------------------------------------------------------------------------------------------------------|--------------------|----------------------|-----------|---|---------------|-----------------|
| P0A1R6 DBHA_SALTY DNA-binding protein HU-alpha | 1            |                      | IAAANVPAFVSGK                   | 70                     | 13                      | 23                       | 180.93        | b2b3b4b5*b5b6*b6y2y3y4*y4y5y6y7*y7y8y9y10*y10y11*y11y12y13                                                          | 1244.69            | 60.155               | 663691    | 2 | 622.85        | -6.47           |
| P0A1R6 DBHA_SALTY DNA-binding protein HU-alpha | 2            |                      | AALESTLAAITESLKEGDAVQLVGFGTFK   | 22                     | 29                      | 43                       | 370.35        | b2b3b4b5*b5b6*b6b7*b7b8*b8b9b12b18b19b23b24b25b26b27b29y1y2y3y4*y4y6y7y8y10y11y12*y12y15y17y18y19y21y22y23y25y27y29 | 2966.58            | 114.529              | 424485    | 3 | 989.53        | 2.55            |
| P0A299 RL7_SALTY 50S ribosomal protein L7/L12  | 1            |                      | DQIIEAVSAMSVM DVVELISAMEEK      | 5                      | 25                      | 27                       | 190.02        | b2*b2b3b4b5b6b7b8b9*b9b10y2*y2y3y4y5*y5y6*y6y7y9*y9y10y11y13*y13y25                                                 | 2737.34            | 137.012              | 26298     | 3 | 913.12        | 1.25            |
| P0A299 RL7_SALTY 50S ribosomal protein L7/L12  | 2            |                      | DLVESAPAALK                     | 85                     | 11                      | 4                        | 31.22         | y4y5y9y11                                                                                                           | 1113.60            | 54.153               | 17224     | 2 | 557.30        | -12.61          |
| P0A299 RL7_SALTY 50S ribosomal protein L7/L12  | 3            |                      | EAKDLVESAPAALKEGVSK             | 82                     | 19                      | 9                        | 41.05         | b3b4*b4b7*b7b8*b8y1y19                                                                                              | 1942.04            | 55.728               | 15876     | 3 | 648.02        | -2.77           |
| P0A299 RL7_SALTY 50S ribosomal protein L7/L12  | 4            |                      | EGVSKDDAEALK                    | 96                     | 12                      | 7                        | 34.15         | b3b12y5*y5y6y9y12                                                                                                   | 1261.64            | 36.129               | 11352     | 2 | 631.32        | 8.22            |
| P0A299 RL7_SALTY 50S ribosomal protein L7/L12  | 5            |                      | EAKDLVESAPAALK                  | 82                     | 14                      | 7                        | 30.65         | b3*b3b4b11y2y3y14                                                                                                   | 1441.80            | 60.967               | 8138      | 2 | 721.40        | 7.62            |
| P0A299 RL7_SALTY 50S ribosomal protein L7/L12  | 6            |                      | SLEEAGAEVEVK                    | 109                    | 12                      | 4                        | 22.21         | b9y2y3y9                                                                                                            | 1260.63            | 45.995               | 2768      | 2 | 630.82        | -4.45           |
| P0A299 RL7_SALTY 50S ribosomal protein L7/L12  | 7            |                      | AAGANKVAVIK                     | 60                     | 11                      | 8                        | 81.76         | b3b7*b7b8b9b10y4y9                                                                                                  | 1041.63            | 29.792               | 34009     | 2 | 521.32        | -11.95          |
| P0A299 RL7_SALTY 50S ribosomal protein L7/L12  | 8            |                      | SITKDQIIEAVSAMSVM DVVELISAMEEK  | 1                      | 29                      | 14                       | 88.28         | b6b7b15*b15b23b27y4y5y6y7y12y13*y13y27                                                                              | 3166.61            | 136.429              | 8535      | 3 | 1056.21       | 6.01            |
| P0A299 RL7_SALTY 50S ribosomal protein L7/L12  | 9            |                      | EAKDLVESAPAALK                  | 82                     | 14                      | 4                        | 27.79         | b3b5*b5b8                                                                                                           | 1441.80            | 105.802              | 2515      | 2 | 721.40        | 3.81            |
| P0A299 RL7_SALTY 50S ribosomal protein L7/L12  | 10           |                      | FGVSAAA AVAAGPAEAAEEKT EFDVILK  | 30                     | 30                      | 5                        | 25.5          | b3b10b11b13y17                                                                                                      | 2932.55            | 137.144              | 1601      | 3 | 978.19        | 6.74            |
| P0A299 RL7_SALTY 50S ribosomal protein L7/L12  | 11           | Oxidation+M(1)       | MSITKDQIIEAVSAMSVM DVVELISAMEEK | 0                      | 30                      | 5                        | 16.47         | b5b10*b10b16y22                                                                                                     | 3313.60            | 101.283              | 7203      | 3 | 1105.20       | -9.65           |
| P0A299 RL7_SALTY 50S ribosomal protein L7/L12  | 12           |                      | SLEEAGAE                        | 109                    | 8                       | 0                        | 2.85          |                                                                                                                     | 805.35             | 45.961               | 6025      | 2 | 403.18        | -7.96           |
| P0A299 RL7_SALTY 50S ribosomal protein L7/L12  | 13           |                      | EAKDLVESAPAAL                   | 82                     | 13                      | 1                        | 7.43          | y4                                                                                                                  | 1313.68            | 55.668               | 1646      | 3 | 438.57        | -10.22          |
| P0A1H5 EFTU_SALTY Elongation factor Tu         | 1            |                      | AIDKPFLLPIDVFSISGR              | 205                    | 19                      | 23                       | 195.12        | b2b4b6b7b8b9b12y2y3y4y5y6*y6y7y8y9*y9y10*y10y11y14y15y19                                                            | 2117.15            | 104.316              | 373288    | 3 | 706.39        | -6.23           |
| P0A1H5 EFTU_SALTY Elongation factor Tu         | 2            |                      | ELLSQYDFPGDDTPIVR               | 155                    | 17                      | 21                       | 160.76        | b2*b2b7b9b13b16b17y1y2y3y4y5y6y8y9*y9y10y11y12y14y17                                                                | 1964.97            | 77.096               | 316030    | 2 | 982.99        | 4.47            |
| P0A1H5 EFTU_SALTY Elongation factor Tu         | 3            |                      | AGENVGVLLR                      | 270                    | 10                      | 6                        | 67.98         | y3y4y5y6y7y10                                                                                                       | 1027.58            | 56.986               | 255214    | 2 | 514.29        | -14.02          |
| P0A1H5 EFTU_SALTY Elongation factor Tu         | 4            |                      | GITINTSHVEYDTPTR                | 59                     | 16                      | 20                       | 169.89        | b2b3*b3b9b12y3y4y6y7y8y9*y9y10y11y12*y12y13y14*y14y16                                                               | 1803.86            | 50.228               | 239791    | 3 | 601.96        | -12.38          |

|                                        |    |                       |                                       |     |    |    |        |                                                                                            |         |         |        |   |         |        |
|----------------------------------------|----|-----------------------|---------------------------------------|-----|----|----|--------|--------------------------------------------------------------------------------------------|---------|---------|--------|---|---------|--------|
| P0A1H5 EFTU_SALTY Elongation factor Tu | 5  |                       | TTDVTGTIELPEGVEMVMPGDNI<br>K          | 334 | 24 | 34 | 223.48 | b1b2°b2b3°b3b4b5°b5b7°b7b8°b8b9°b9b10°b10b14°b14b16y3y5y6°y6*y6y7y8y9y10y11y13y14y15y16y24 | 2546.26 | 86.762  | 234542 | 2 | 1273.63 | 9.97   |
| P0A1H5 EFTU_SALTY Elongation factor Tu | 6  |                       | TTLTAAITTVLAK                         | 25  | 13 | 15 | 126.7  | b2°b2b4b5°b5b13y2y3y4y6y7y8y9y10y11                                                        | 1303.78 | 84.541  | 203301 | 2 | 652.39  | -3.75  |
| P0A1H5 EFTU_SALTY Elongation factor Tu | 7  |                       | IELAGFLDSYIPEPER                      | 188 | 17 | 27 | 250.9  | b2b3b4b5b6b7b11°b11b12b14y1y3°y3y4y5y6y7°y7y8y9°y9y10y11y12y13y14y17                       | 1962.03 | 101.844 | 172049 | 2 | 981.52  | 5.10   |
| P0A1H5 EFTU_SALTY Elongation factor Tu | 8  |                       | QVGVPYIIVFLNK                         | 124 | 13 | 8  | 47.74  | b3b4*b4b13y4y9y11y13                                                                       | 1489.88 | 98.954  | 167098 | 2 | 745.44  | 1.15   |
| P0A1H5 EFTU_SALTY Elongation factor Tu | 9  |                       | ALEGDAEWEAK                           | 177 | 11 | 10 | 64.77  | b4b6°b6b10b11y2y4y9y10°y10                                                                 | 1218.56 | 46.934  | 107505 | 2 | 609.78  | -1.10  |
| P0A1H5 EFTU_SALTY Elongation factor Tu | 10 | Carbamidomethyl+C(3)  | STCTGVEMFR                            | 253 | 10 | 6  | 51.78  | y2y4y6y7y8y10                                                                              | 1187.51 | 53.516  | 71189  | 2 | 594.26  | -6.27  |
| P0A1H5 EFTU_SALTY Elongation factor Tu | 11 | Carbamidomethyl+C(1)  | CDMVDDEELLELVEMEV                     | 137 | 18 | 9  | 50.42  | b2b3b4y2y3y6y8y12y18                                                                       | 2224.00 | 106.006 | 37850  | 2 | 1112.51 | 10.21  |
| P0A1H5 EFTU_SALTY Elongation factor Tu | 12 |                       | NMITGAAQMDGAILVVAATDGP<br>MPQTR       | 90  | 27 | 11 | 39.53  | b3b7°b7b8°b8b9y7*y7y11*y11y27                                                              | 2729.31 | 105.659 | 16831  | 3 | 910.44  | -10.64 |
| P0A1H5 EFTU_SALTY Elongation factor Tu | 13 |                       | GYRPQFYFR                             | 325 | 9  | 5  | 45.36  | b3b4b5y3y9                                                                                 | 1233.61 | 59.252  | 16644  | 2 | 617.31  | -8.41  |
| P0A1H5 EFTU_SALTY Elongation factor Tu | 14 |                       | VGEEVEIVGIK                           | 238 | 11 | 13 | 55.84  | b2b4°b4b5°b5b9°b9b10°b10b11y2y3y11                                                         | 1171.66 | 45.615  | 16512  | 2 | 586.33  | 2.08   |
| P0A1H5 EFTU_SALTY Elongation factor Tu | 15 |                       | FESEVYILSKDEGGR                       | 304 | 15 | 4  | 29.35  | b3b8b11y6                                                                                  | 1728.84 | 86.084  | 11278  | 2 | 864.93  | 0.35   |
| P0A1H5 EFTU_SALTY Elongation factor Tu | 16 |                       | MVVTLIHPIAMDDGLR                      | 358 | 16 | 21 | 187.85 | b3b4°b4b5°b5b7°b7y3y4y5°y5y6y7y9°y9y10°y10y11y12y13y15                                     | 1780.91 | 79.040  | 686962 | 3 | 594.31  | -17.82 |
| P0A1H5 EFTU_SALTY Elongation factor Tu | 17 |                       | LLDEGR                                | 264 | 6  | 3  | 39.98  | y3y4y5                                                                                     | 702.37  | 27.507  | 7890   | 2 | 351.69  | -13.03 |
| P0A1H5 EFTU_SALTY Elongation factor Tu | 18 |                       | EHILLGR                               | 117 | 7  | 3  | 37.37  | b3y4y5                                                                                     | 837.48  | 42.164  | 4406   | 2 | 419.24  | -16.25 |
| P0A1H5 EFTU_SALTY Elongation factor Tu | 19 |                       | GSALKALEGDAEWEAK                      | 172 | 16 | 4  | 17.1   | b3°b3b14y7                                                                                 | 1674.84 | 35.349  | 75798  | 4 | 419.47  | 4.08   |
| P0A1H5 EFTU_SALTY Elongation factor Tu | 20 |                       | GTVVTGRVER                            | 224 | 10 | 6  | 73.39  | b6b9y3y5y7y8                                                                               | 1073.60 | 26.344  | 50770  | 2 | 537.30  | -10.12 |
| P0A1H5 EFTU_SALTY Elongation factor Tu | 21 | Carbamidomethyl+C(14) | QVGVPYIIVFLNKCDMVDDEELLE<br>LVEMEV    | 124 | 31 | 7  | 48.76  | b3y3°y3y4y5y6°y6                                                                           | 3694.85 | 127.295 | 14145  | 3 | 1232.29 | 2.58   |
| P0A1H5 EFTU_SALTY Elongation factor Tu | 22 |                       | GYRPQFYFRTTDVTGTIELPEGVE<br>MVMPGDNIK | 325 | 33 | 4  | 11.04  | b20y9°y9y15                                                                                | 3760.79 | 97.388  | 8757   | 3 | 1254.27 | -12.98 |
| P0A1H5 EFTU_SALTY Elongation factor Tu | 23 |                       | HTPFKGYRPQFYFR                        | 319 | 15 | 4  | 26.16  | b8°b8b9b12                                                                                 | 1990.98 | 93.052  | 6691   | 2 | 995.99  | -13.98 |
| P0A1H5 EFTU_SALTY Elongation factor Tu | 24 | Carbamidomethyl+C(23) | GITINTSHVEYDTPTRHYAHVDCP<br>GHADYVK   | 59  | 31 | 4  | 11.23  | b14y9°y9y13                                                                                | 3553.70 | 117.047 | 5476   | 3 | 1185.24 | 11.95  |
| P0A1H5 EFTU_SALTY Elongation factor Tu | 25 |                       | ARGITINTSHVEYDTPTR                    | 57  | 18 | 4  | 22.69  | y6y11y13*y13                                                                               | 2031.00 | 91.594  | 3698   | 2 | 1016.00 | -14.61 |
| P0A1H5 EFTU_SALTY Elongation factor Tu | 26 |                       | ALEGDAEWEAKIELAGFLDSYIPE<br>PER       | 177 | 28 | 4  | 17.27  | b6b11b13y3                                                                                 | 3161.52 | 88.788  | 2097   | 3 | 1054.51 | -13.75 |
| P0A1H5 EFTU_SALTY Elongation factor Tu | 27 |                       | TYGGAARAFDQIDNAPEEK                   | 38  | 19 | 5  | 25.79  | b3°b3b4b14y4                                                                               | 2052.98 | 83.180  | 1995   | 3 | 685.00  | 10.35  |
| P0A1H5 EFTU_SALTY Elongation factor Tu | 28 | Phosphoryl STY(9)     | TKPHVNVGTIGHVDH GK                    | 8   | 17 | 6  | 36.03  | b4b8°b8b9b11_H3PO4<br>b11y11                                                               | 1875.92 | 49.762  | 2229   | 3 | 625.98  | 3.25   |
| P0A1H5 EFTU_SALTY Elongation factor Tu | 29 | Oxidation+M(1)        | MVVTLIHPIAMDDGLR                      | 358 | 16 | 4  | 27.58  | b3y3y5y9                                                                                   | 1796.91 | 73.899  | 38899  | 3 | 599.64  | -14.61 |
| P0A1H5 EFTU_SALTY Elongation factor Tu | 30 | Oxidation+M(23)       | NMITGAAQMDGAILVVAATDGP<br>MPQTR       | 90  | 27 | 4  | 17.72  | b4b14b17y13                                                                                | 2745.36 | 96.863  | 2732   | 4 | 687.10  | 9.07   |

|                                                          |    |                                             |                          |     |    |    |        |                                                                                                                                                  |         |         |        |   |        |        |
|----------------------------------------------------------|----|---------------------------------------------|--------------------------|-----|----|----|--------|--------------------------------------------------------------------------------------------------------------------------------------------------|---------|---------|--------|---|--------|--------|
| P0A1H5 EFTU_SALTY Elongation factor Tu                   | 31 |                                             | INTSHVEYDTPTR            | 62  | 13 | 4  | 14.32  | b3b10°b10*b10                                                                                                                                    | 1532.74 | 50.235  | 1933   | 2 | 766.87 | 3.27   |
| P0A1H5 EFTU_SALTY Elongation factor Tu                   | 32 |                                             | PIEDVFSISGR              | 213 | 11 | 1  | 7.43   | b10                                                                                                                                              | 1219.63 | 104.300 | 1511   | 2 | 610.32 | -3.50  |
| P0A1H5 EFTU_SALTY Elongation factor Tu                   | 33 |                                             | GITINTSHVEYDTPTR         | 59  | 16 | 2  | 10.03  | b10y5                                                                                                                                            | 1785.87 | 50.210  | 12667  | 3 | 595.96 | -0.55  |
| P0A1H5 EFTU_SALTY Elongation factor Tu                   | 34 |                                             | GYRPQFYFR                | 325 | 9  | 0  | 1.63   |                                                                                                                                                  | 1216.58 | 59.256  | 1982   | 3 | 406.20 | -6.62  |
| P0A1P0 G3P1_SALTY Glyceraldehyde-3-phohate dehydrogenase | 1  |                                             | VINDNFGIIEGLMTTVHATTATQK | 160 | 24 | 50 | 314.88 | b2b3b4°b4*b4b5*b5b6°b6*b6b7°b7*b7b12y1y2*y2y3y4y6°y6*y6y7°y7*y7y8*y8y9y10y11°y11y13y14y15°y15*y15y16*y16y17y18°y18y19y20y21y22°y22*y22y23y24*y24 | 2574.32 | 97.906  | 508317 | 3 | 858.78 | 0.09   |
| P0A1P0 G3P1_SALTY Glyceraldehyde-3-phohate dehydrogenase | 2  |                                             | AGIALNDNFVK              | 296 | 11 | 17 | 110.36 | b1b3b4b8y1y2y3y4*y4y5*y5y6y7*y7y8*y8y11                                                                                                          | 1161.62 | 61.965  | 229832 | 2 | 581.31 | -9.35  |
| P0A1P0 G3P1_SALTY Glyceraldehyde-3-phohate dehydrogenase | 3  |                                             | GASQNIIPSSTGAAK          | 198 | 15 | 21 | 141.35 | b3°b3b5°b5°b5b6°b6°b6b7°b7*b7y1y4y5y6y7y8y9y10y11y15                                                                                             | 1401.73 | 41.645  | 183390 | 2 | 701.37 | -4.09  |
| P0A1P0 G3P1_SALTY Glyceraldehyde-3-phohate dehydrogenase | 4  |                                             | LVSWYDNETGYSNK           | 307 | 14 | 17 | 145.71 | b2b6b11*b11b12y2y3y4y5°y5y6y8y9y10y11y12y14                                                                                                      | 1675.77 | 58.988  | 172191 | 2 | 838.39 | 3.13   |
| P0A1P0 G3P1_SALTY Glyceraldehyde-3-phohate dehydrogenase | 5  |                                             | VLDLIAHISK               | 321 | 10 | 8  | 74.18  | b2b3y2y3y4y5y6y8                                                                                                                                 | 1108.66 | 65.499  | 116265 | 2 | 554.83 | -10.46 |
| P0A1P0 G3P1_SALTY Glyceraldehyde-3-phohate dehydrogenase | 6  |                                             | AATYEQIK                 | 249 | 8  | 17 | 93.55  | b1b5b6b7°b7b8°b8y2y4°y4*y4y5y6°y6y7y8*y8                                                                                                         | 923.47  | 31.609  | 102254 | 2 | 462.24 | -13.48 |
| P0A1P0 G3P1_SALTY Glyceraldehyde-3-phohate dehydrogenase | 7  |                                             | SDIEIVAINDLLDAEYMAYMLK   | 24  | 22 | 25 | 170.52 | b2b3°b3b4b5°b5b6°b6b7b8b10°b10*b10y2y3y4y5y6y7y9y10°y10y11y13y22                                                                                 | 2530.25 | 125.734 | 84118  | 3 | 844.09 | 1.06   |
| P0A1P0 G3P1_SALTY Glyceraldehyde-3-phohate dehydrogenase | 8  |                                             | VPTPNVSVVDLTVR           | 232 | 14 | 7  | 56.6   | y5y6y10y11y12°y12y14                                                                                                                             | 1495.85 | 71.370  | 72808  | 2 | 748.43 | -1.47  |
| P0A1P0 G3P1_SALTY Glyceraldehyde-3-phohate dehydrogenase | 9  |                                             | VVLTGPSKDNTPMFVK         | 116 | 16 | 6  | 28.25  | b2b3y3y13y14y16                                                                                                                                  | 1732.91 | 58.182  | 48151  | 3 | 578.31 | -12.68 |
| P0A1P0 G3P1_SALTY Glyceraldehyde-3-phohate dehydrogenase | 10 |                                             | FDGTVEVKDGLHIVNGK        | 53  | 17 | 8  | 27.31  | b8b9°b9b11°b11y1y9y17                                                                                                                            | 1827.97 | 60.904  | 20715  | 2 | 914.49 | 3.87   |
| P0A1P0 G3P1_SALTY Glyceraldehyde-3-phohate dehydrogenase | 11 | Carbamidomethyl+C(12);Carbamidomethyl+C(16) | YEQDIVSNASCTTNCLAPLAK    | 138 | 22 | 3  | 19.91  | b7b9b13                                                                                                                                          | 2412.12 | 72.791  | 9419   | 3 | 804.71 | 1.21   |
| P0A1P0 G3P1_SALTY Glyceraldehyde-3-phohate dehydrogenase | 12 |                                             | VLPELNGK                 | 217 | 8  | 8  | 53.98  | y3y4*y4y5°y5*y5y6°y6                                                                                                                             | 869.49  | 45.500  | 57092  | 2 | 435.25 | -16.78 |
| P0A1P0 G3P1_SALTY Glyceraldehyde-3-phohate dehydrogenase | 13 |                                             | GANFDK                   | 132 | 6  | 1  | 13.6   | b5                                                                                                                                               | 651.31  | 44.579  | 4707   | 1 | 651.31 | 6.65   |
| P0A1P0 G3P1_SALTY Glyceraldehyde-3-phohate dehydrogenase | 14 |                                             | WDEVGVDVVAEATGIFLTDETAR  | 84  | 23 | 5  | 17.42  | b8b12y6y14°y14                                                                                                                                   | 2493.19 | 69.512  | 3020   | 4 | 624.05 | -11.46 |

|                                                           |    |                                                      |                                   |     |    |    |        |                                                                                                                                   |         |         |        |   |         |        |
|-----------------------------------------------------------|----|------------------------------------------------------|-----------------------------------|-----|----|----|--------|-----------------------------------------------------------------------------------------------------------------------------------|---------|---------|--------|---|---------|--------|
| [P0A1P0]G3P1_SALTY Glyceraldehyde-3-phohate dehydrogenase | 15 | Carbamidomethyl+C(18)<br>;Carbamidomethyl+C(22)<br>) | GANFDKYEGQDIVSNASCTTNCL<br>APLAK  | 132 | 28 | 38 | 302.49 | b4b5*b5b6*b6b7*b7b8b9b10b11*b11b12*b12b13*b13b16b17b24*b24b26b27y3y4y5y6y8y9y10y11*y11y12*y12*y12y14*y14y15y16                    | 3044.42 | 67.103  | 331645 | 3 | 1015.48 | 3.69   |
| [P0A1P0]G3P1_SALTY Glyceraldehyde-3-phohate dehydrogenase | 16 |                                                      | TVDGPSHKDWR                       | 184 | 11 | 4  | 24.23  | b5b9°b9y9                                                                                                                         | 1297.62 | 71.947  | 24283  | 2 | 649.32  | -4.42  |
| [P0A1P0]G3P1_SALTY Glyceraldehyde-3-phohate dehydrogenase | 17 |                                                      | AGIALNDNFVKLVSWYDNETGYS<br>NK     | 296 | 25 | 4  | 23.03  | b4b8b9y4                                                                                                                          | 2818.39 | 96.376  | 17108  | 3 | 940.13  | 7.10   |
| [P0A1P0]G3P1_SALTY Glyceraldehyde-3-phohate dehydrogenase | 18 |                                                      | VLPELNGKLTGMAFR                   | 217 | 15 | 5  | 36.62  | y5y10y11y13*y13                                                                                                                   | 1645.89 | 73.195  | 16103  | 3 | 549.30  | -13.72 |
| [P0A1P0]G3P1_SALTY Glyceraldehyde-3-phohate dehydrogenase | 19 |                                                      | GGRGASQNIPSSSTGAAK                | 195 | 18 | 6  | 40.04  | b8b9y3y8y9°y9                                                                                                                     | 1671.88 | 37.330  | 10145  | 2 | 836.44  | 1.31   |
| [P0A1P0]G3P1_SALTY Glyceraldehyde-3-phohate dehydrogenase | 20 |                                                      | SDIEIVAINDLLDAEYMayMLKYD<br>STHGR | 24  | 29 | 8  | 27.11  | b7b10*b10b13°b13b15y5y8                                                                                                           | 3346.62 | 82.162  | 3099   | 3 | 1116.21 | 7.37   |
| [P0A1P0]G3P1_SALTY Glyceraldehyde-3-phohate dehydrogenase | 21 | Phosphoryl.STY(6)                                    | TVDGPSHKDWR                       | 184 | 11 | 3  | 24.23  | b5b10y4                                                                                                                           | 1377.57 | 56.648  | 22639  | 3 | 459.86  | -9.66  |
| [P0A1P0]G3P1_SALTY Glyceraldehyde-3-phohate dehydrogenase | 22 |                                                      | DLIAHISK                          | 323 | 8  | 4  | 51.78  | b3b4b5b6                                                                                                                          | 896.51  | 65.491  | 35637  | 2 | 448.76  | -13.55 |
| [P0A1P0]G3P1_SALTY Glyceraldehyde-3-phohate dehydrogenase | 23 |                                                      | LDLIAHISK                         | 322 | 9  | 2  | 20.63  | b3b6                                                                                                                              | 1009.60 | 65.494  | 32790  | 2 | 505.30  | -9.01  |
| [P0A1P0]G3P1_SALTY Glyceraldehyde-3-phohate dehydrogenase | 24 |                                                      | AATYEQIK                          | 249 | 8  | 0  | 1.22   |                                                                                                                                   | 905.46  | 31.607  | 36276  | 2 | 453.23  | -6.67  |
| [P0A1S2]HNS_SALTY DNA-binding protein H-NS                | 1  |                                                      | EMLIADGIDPNELLNSMAAAK             | 62  | 21 | 46 | 346.62 | b2°b2b3°b3b4°b4b5°b5b6°b6b7°b7b8°b8b9°b9b10b12°b12b13°b13b14°b14°b14b15b21y2y3y4y5y6y7y8y9y10y12*y12y13y14°y14*y14y15y16y17y18y21 | 2216.11 | 96.856  | 591269 | 2 | 1108.56 | 9.14   |
| [P0A1S2]HNS_SALTY DNA-binding protein H-NS                | 2  |                                                      | YSYVDENGETK                       | 96  | 11 | 8  | 35.99  | b1y2y8*y8y9y10*y10y11                                                                                                             | 1304.56 | 33.796  | 43492  | 2 | 652.78  | -5.90  |
| [P0A1S2]HNS_SALTY DNA-binding protein H-NS                | 3  | Carbamidomethyl+C(2)                                 | ECTLETLEEMLEK                     | 19  | 13 | 5  | 28.05  | b2y8y10y11y13                                                                                                                     | 1624.76 | 92.718  | 19124  | 2 | 812.88  | 6.91   |
| [P0A1S2]HNS_SALTY DNA-binding protein H-NS                | 4  |                                                      | LQQYREMLIADGIDPNELLNSMAAAK        | 57  | 26 | 10 | 55.45  | b3b6b11b12y5y7°y7y13y18y20                                                                                                        | 2904.48 | 99.801  | 11413  | 4 | 726.88  | 8.07   |
| [P0A1S2]HNS_SALTY DNA-binding protein H-NS                | 5  |                                                      | YSYVDENGETKTWTGQGR                | 96  | 18 | 16 | 145.61 | y3y4*y4y5y6°y6y7*y7y8y10*y10y11°y11y14y15y17                                                                                      | 2090.92 | 47.516  | 139305 | 3 | 697.65  | -8.06  |
| [P0A1S2]HNS_SALTY DNA-binding protein H-NS                | 6  | Carbamidomethyl+C(2)                                 | ECTLETLEEMLEKLEV VVNER            | 19  | 21 | 9  | 86.16  | b7y3y4y5y6y8y15y16y17                                                                                                             | 2563.26 | 123.641 | 103046 | 3 | 855.09  | -0.29  |
| [P0A1S2]HNS_SALTY DNA-binding protein H-NS                | 7  |                                                      | LQQYREMLIADGIDPNELLNSMAAAK        | 57  | 26 | 9  | 37.13  | b3b8°b8b9b14y3y5y13*y13                                                                                                           | 2904.49 | 92.922  | 31932  | 3 | 968.84  | 10.84  |
| [P0A1S2]HNS_SALTY DNA-binding protein H-NS                | 8  |                                                      | AARPAKYSYVDENGETK                 | 90  | 17 | 4  | 29.83  | b9b12y8y9                                                                                                                         | 1898.90 | 71.919  | 12222  | 2 | 949.95  | -11.64 |
| [P0A1S2]HNS_SALTY DNA-binding protein H-NS                | 9  | Oxidation+M(2)                                       | EMLIADGIDPNELLNSMAAAK             | 62  | 21 | 5  | 26.64  | b3b5b12y7y12                                                                                                                      | 2232.12 | 91.525  | 17999  | 2 | 1116.56 | 11.81  |
| [P0A1S2]HNS_SALTY DNA-binding protein H-NS                | 10 | Oxidation+M(22)                                      | LQQYREMLIADGIDPNELLNSMAAAK        | 57  | 26 | 6  | 27.39  | b6y5y7y9y10*y10                                                                                                                   | 2920.49 | 105.255 | 14866  | 3 | 974.17  | 12.96  |

|                                                            |    |                      |                              |     |    |    |        |                                                                          |         |         |        |   |         |        |
|------------------------------------------------------------|----|----------------------|------------------------------|-----|----|----|--------|--------------------------------------------------------------------------|---------|---------|--------|---|---------|--------|
| P0A1S2 HNS_SALTY DNA-binding protein H-NS                  | 11 |                      | MLIADGIDPNELLNSMAAAK         | 63  | 20 | 3  | 20.47  | b4b13b17                                                                 | 2087.05 | 96.837  | 5319   | 2 | 1044.03 | -2.57  |
| P0A1S2 HNS_SALTY DNA-binding protein H-NS                  | 12 |                      | QQYREMLIADGIDPNELLNSMAAAK    | 58  | 25 | 6  | 22.78  | b9*b9b10*b10*b10b19                                                      | 2791.39 | 99.830  | 3349   | 4 | 698.60  | 3.67   |
| P0A2H9 DSBA_SALTY Thiol:disulfide interchange protein dsbA | 1  |                      | AAADLQLQGVPMAMFVNGK          | 158 | 18 | 27 | 196.97 | b1b2b4b5b6*b6b7b8b10b14b16b18y2y3*y3y5*y5y6y7y8*y8y10y11*y11y12y13y18    | 1829.96 | 80.961  | 234275 | 2 | 915.49  | 2.67   |
| P0A2H9 DSBA_SALTY Thiol:disulfide interchange protein dsbA | 2  |                      | YQINPQGMDTSSMDVVFQQYADTVK    | 176 | 25 | 20 | 104.45 | b2*b2b3b4b5*b5b10b11b15y1y2y3y5y6y7*y7y9y11y12y25                        | 2865.32 | 86.547  | 122288 | 3 | 955.78  | 3.83   |
| P0A2H9 DSBA_SALTY Thiol:disulfide interchange protein dsbA | 3  |                      | TQTVQSAADIR                  | 116 | 11 | 9  | 55.84  | b2b3*b3y2y6y7y8y9y11                                                     | 1189.61 | 36.019  | 46306  | 2 | 595.31  | -8.52  |
| P0A2H9 DSBA_SALTY Thiol:disulfide interchange protein dsbA | 4  |                      | ELTQAWAVAMALGVEDK            | 88  | 17 | 4  | 23.25  | b13y4y5°y5                                                               | 1831.92 | 86.889  | 1711   | 2 | 916.47  | -1.67  |
| P0A2H9 DSBA_SALTY Thiol:disulfide interchange protein dsbA | 5  |                      | IWLALAGMVLAFSASAAQISDGK      | 3   | 23 | 5  | 37.25  | y6y9y12y14y15                                                            | 2320.20 | 85.788  | 2273   | 3 | 774.07  | -16.84 |
| P0A2H9 DSBA_SALTY Thiol:disulfide interchange protein dsbA | 6  | Oxidation+M(21)      | YHVEFLGPLGKELTQAWAVAMALGVEDK | 77  | 28 | 3  | 17.69  | y5y9y11                                                                  | 3088.57 | 78.672  | 4293   | 4 | 772.90  | -2.85  |
| Q7CQ05 GRCA_SALTY Autonomous glycy1 radical cofactor       | 1  |                      | MITGIQITK                    | 0   | 9  | 6  | 38.19  | b2y2y3y6y7y9                                                             | 1004.57 | 55.587  | 124424 | 2 | 502.79  | -11.12 |
| Q7CQ05 GRCA_SALTY Autonomous glycy1 radical cofactor       | 2  |                      | SGFAEDEVVAVSK                | 35  | 13 | 11 | 83.21  | b3b4b9y2y4y5y8y9°y9y10y13                                                | 1337.66 | 55.200  | 82745  | 2 | 669.33  | -1.28  |
| Q7CQ05 GRCA_SALTY Autonomous glycy1 radical cofactor       | 3  |                      | LGEIEYR                      | 48  | 7  | 10 | 63.75  | b2b3y2y3°y3y4y5y6°y6y7                                                   | 879.45  | 42.896  | 58419  | 2 | 440.23  | -11.52 |
| Q7CQ05 GRCA_SALTY Autonomous glycy1 radical cofactor       | 4  |                      | FNSLTPEQQRDV1AR              | 106 | 15 | 13 | 53.46  | b2*b2b3°b3b4y2y3y4y10°y10*y10y13y15                                      | 1773.90 | 48.108  | 55858  | 3 | 591.97  | -11.15 |
| Q7CQ05 GRCA_SALTY Autonomous glycy1 radical cofactor       | 5  |                      | FNSLTPEQQR                   | 106 | 10 | 13 | 88.34  | b2*b2b3°b3b4°b4y3y5*y5y6y7y8y10                                          | 1219.60 | 38.758  | 52724  | 2 | 610.30  | -7.81  |
| Q7CQ05 GRCA_SALTY Autonomous glycy1 radical cofactor       | 6  |                      | VEGGQH1NVNVLR                | 66  | 13 | 11 | 59.84  | b3b9*b9b10°b10y1y6*y6y7y8y13                                             | 1434.76 | 50.688  | 45359  | 3 | 478.93  | -12.76 |
| Q7CQ05 GRCA_SALTY Autonomous glycy1 radical cofactor       | 7  |                      | EIPMEVKPEVR                  | 55  | 11 | 8  | 70.79  | b5y2y4y6y7y8y9y11                                                        | 1326.71 | 49.132  | 34122  | 2 | 663.86  | 3.59   |
| Q7CQ05 GRCA_SALTY Autonomous glycy1 radical cofactor       | 8  |                      | AANDDLLNSFWLLDSEK            | 9   | 17 | 4  | 23.25  | b3y4°y4y5                                                                | 1950.95 | 77.286  | 2714   | 3 | 650.99  | 4.76   |
| Q7CQ05 GRCA_SALTY Autonomous glycy1 radical cofactor       | 9  |                      | TFTESL                       | 121 | 6  | 4  | 39.98  | b4°b4b5y5                                                                | 697.33  | 56.216  | 37277  | 1 | 697.33  | -8.84  |
| Q7CQ05 GRCA_SALTY Autonomous glycy1 radical cofactor       | 10 |                      | AANDDLLNSFWLLDSEKGEAR        | 9   | 21 | 27 | 260.08 | b3b4b5°b5*b5b6*b6b7*b7b14y3y4y5y7y8y9y10y11°y11y12y13y14°y14y15y16y18y19 | 2364.14 | 92.588  | 194786 | 3 | 788.72  | -4.03  |
| Q7CQ05 GRCA_SALTY Autonomous glycy1 radical cofactor       | 11 | Carbamidomethyl+C(1) | CIVAKSGFAEDEVVAVSK           | 30  | 18 | 3  | 22.93  | b5b6y13                                                                  | 1908.96 | 75.818  | 5111   | 2 | 954.98  | -8.44  |
| Q7CQ05 GRCA_SALTY Autonomous glycy1 radical cofactor       | 12 |                      | ETLEDAVKHPEK                 | 80  | 12 | 3  | 29.41  | b5b6b9                                                                   | 1395.71 | 96.879  | 4082   | 2 | 698.36  | -3.50  |
| Q7CQ05 GRCA_SALTY Autonomous glycy1 radical cofactor       | 13 |                      | SGFAEDEVVAVSKLGEIEYR         | 35  | 20 | 4  | 37.66  | b3b4b5b14                                                                | 2198.11 | 100.661 | 2891   | 2 | 1099.56 | 4.89   |
| Q7CQ05 GRCA_SALTY Autonomous glycy1 radical cofactor       | 14 | Phosphoryl.STY(9)    | AANDDLLNSFWLLDSEK            | 9   | 17 | 3  | 23.25  | b8y7y8                                                                   | 2030.89 | 87.761  | 17191  | 3 | 677.63  | -6.97  |
| Q7CQ05 GRCA_SALTY Autonomous glycy1 radical cofactor       | 15 |                      | PMEVKPEVR                    | 57  | 9  | 2  | 21.83  | b3b4                                                                     | 1084.58 | 49.156  | 31599  | 2 | 542.79  | -5.40  |
| Q7CQ05 GRCA_SALTY Autonomous glycy1 radical cofactor       | 16 |                      | TGIQITK                      | 2   | 7  | 3  | 23.24  | b4*b4b5                                                                  | 760.45  | 55.573  | 4945   | 1 | 760.45  | -9.87  |
| Q7CQ05 GRCA_SALTY Autonomous glycy1 radical cofactor       | 17 |                      | EIPMEVKPEVR                  | 55  | 11 | 0  | 2.44   |                                                                          | 1308.68 | 49.160  | 10043  | 3 | 436.90  | -11.10 |

|                                                    |    |                      |                                        |     |    |    |        |                                                                                                                |         |         |        |   |         |        |
|----------------------------------------------------|----|----------------------|----------------------------------------|-----|----|----|--------|----------------------------------------------------------------------------------------------------------------|---------|---------|--------|---|---------|--------|
| [P0A1D5]CH10_SALTY 10 kDa chaperonin               | 1  |                      | VGDIVIFNDGYGVK                         | 60  | 14 | 19 | 162.12 | b3b4°b4b5°b5b6b13°b13y1y3y5y6y7y8y9y10y12°y12y14                                                               | 1495.78 | 73.840  | 212623 | 2 | 748.39  | -1.55  |
| [P0A1D5]CH10_SALTY 10 kDa chaperonin               | 2  |                      | ILDNGTVQPLDVK                          | 47  | 13 | 33 | 209.52 | b2b6°b6°b6b7°b7b8°b8b9°b9b10b11°b11°b11b13y1y2y3y4y5y6°y6°y6y7y8y9y10y11°y11°y11y12°y12y13                     | 1411.77 | 58.086  | 183904 | 2 | 706.39  | -3.11  |
| [P0A1D5]CH10_SALTY 10 kDa chaperonin               | 3  |                      | SAGGIVLTGSAAGK                         | 20  | 14 | 15 | 121.09 | b2b4°b4b6°b6y2y3y4y6y7y8y9y11y12y14                                                                            | 1188.65 | 44.439  | 119252 | 2 | 594.83  | -8.83  |
| [P0A1D5]CH10_SALTY 10 kDa chaperonin               | 4  |                      | GEIIAVGK                               | 37  | 8  | 5  | 62.4   | b3y3y4y5y6                                                                                                     | 786.46  | 42.251  | 21387  | 2 | 393.73  | -18.94 |
| [P0A1D5]CH10_SALTY 10 kDa chaperonin               | 5  |                      | EVESK                                  | 15  | 5  | 1  | 13.19  | y4                                                                                                             | 591.30  | 28.945  | 2547   | 1 | 591.30  | -0.10  |
| [P0A1D5]CH10_SALTY 10 kDa chaperonin               | 6  |                      | IDNEEVLIMSESDILAIVEA                   | 77  | 20 | 3  | 14.32  | b9b12y10                                                                                                       | 2203.09 | 83.944  | 2253   | 3 | 735.03  | -6.87  |
| [P0A1D5]CH10_SALTY 10 kDa chaperonin               | 7  |                      | STRGEIIAVGK                            | 34  | 11 | 4  | 50.43  | b5b6b8b9                                                                                                       | 1130.65 | 38.428  | 62178  | 2 | 565.83  | -6.15  |
| [P0A1D5]CH10_SALTY 10 kDa chaperonin               | 8  |                      | EVESKSAGGIVLTGSAAGK                    | 15  | 19 | 6  | 38.04  | b4°b4b7°b7b8b9                                                                                                 | 1760.94 | 68.579  | 2413   | 3 | 587.65  | 2.43   |
| [P0A1D5]CH10_SALTY 10 kDa chaperonin               | 9  |                      | VGDIVIFNDGYGVKSEK                      | 60  | 17 | 4  | 23.25  | b9°b9b10y10                                                                                                    | 1839.94 | 137.609 | 2047   | 2 | 920.48  | -2.72  |
| [P17215]LIVJ_SALTY Leu/Ile/Val/Thr-binding protein | 1  |                      | TQFMGPEGVANVSLSNAGESAEGLLVTKPK         | 240 | 31 | 25 | 181.94 | b1°b1b2°b2b3b4b5°b5b12y3y4y5y6y8y13y14y16y17y19y22y26y27y28y29y31                                              | 3144.64 | 88.456  | 227633 | 3 | 1048.88 | 4.35   |
| [P17215]LIVJ_SALTY Leu/Ile/Val/Thr-binding protein | 2  |                      | NYDQVPANKPIVDAIK                       | 271 | 16 | 14 | 95.86  | b2°b2b3°b3b4b5y2y3y5y7y10y11y12y16                                                                             | 1784.93 | 54.387  | 215411 | 3 | 595.65  | -11.63 |
| [P17215]LIVJ_SALTY Leu/Ile/Val/Thr-binding protein | 3  |                      | TTGLDSDQGPTAAK                         | 137 | 14 | 28 | 179.29 | b2°b2b3°b3b4b5°b5b8°b8b10b12°b12y2y3y5°y5y6°y6y8°y8y9°y9y10°y10°y10y11y12y14                                   | 1361.65 | 30.211  | 132870 | 2 | 681.33  | -3.94  |
| [P17215]LIVJ_SALTY Leu/Ile/Val/Thr-binding protein | 4  |                      | GGVNVVFFDGITAGEKDFSTLVAR               | 185 | 24 | 16 | 88.08  | b3b4b6°b6b7°b7b13b24y7y12y13°y13y18y19y20y24                                                                   | 2499.29 | 101.913 | 107405 | 3 | 833.77  | -1.07  |
| [P17215]LIVJ_SALTY Leu/Ile/Val/Thr-binding protein | 5  | Carbamidomethyl+C(7) | YVIGHLCSSSTQPASDIYEDEGILMITPAATAPELTAR | 92  | 38 | 16 | 106.01 | b2b10b11°b11b12°b12b24b25b26y6y8y11y12y13y14y38                                                                | 4078.01 | 89.376  | 96438  | 3 | 1360.01 | 8.62   |
| [P17215]LIVJ_SALTY Leu/Ile/Val/Thr-binding protein | 6  |                      | VAVVGAMSGPVAQYGDQEFTGAEQAIADINAK       | 25  | 32 | 15 | 56.2   | b2b3b6b8°b8b14y3y5y6°y6°y6y12y13y25y32                                                                         | 3207.58 | 90.003  | 63871  | 3 | 1069.87 | 5.86   |
| [P17215]LIVJ_SALTY Leu/Ile/Val/Thr-binding protein | 7  |                      | QQYGEGLAR                              | 168 | 9  | 8  | 45.36  | b7b9y5y6°y6y7y9°y9                                                                                             | 1021.50 | 33.741  | 46028  | 2 | 511.25  | -10.34 |
| [P17215]LIVJ_SALTY Leu/Ile/Val/Thr-binding protein | 8  |                      | GATVDVTVMGPLSWDEK                      | 326 | 16 | 4  | 24.17  | b6b9y4y9                                                                                                       | 1705.83 | 65.222  | 6872   | 3 | 569.28  | 9.30   |
| [P17215]LIVJ_SALTY Leu/Ile/Val/Thr-binding protein | 9  |                      | ENIDFVYYGGYHPMGQILR                    | 212 | 20 | 4  | 14.32  | b9b12y9°y9                                                                                                     | 2401.12 | 86.564  | 9195   | 4 | 601.03  | -4.88  |
| [P17215]LIVJ_SALTY Leu/Ile/Val/Thr-binding protein | 10 | Carbamidomethyl+C(6) | TLLAGCIALSLSHMAFADDIK                  | 4   | 21 | 4  | 29.94  | y6y7y9y13                                                                                                      | 2247.12 | 104.687 | 1711   | 2 | 1124.06 | -15.32 |
| [P17215]LIVJ_SALTY Leu/Ile/Val/Thr-binding protein | 11 |                      | DFSTLVAR                               | 201 | 8  | 3  | 40.79  | b3b6b7                                                                                                         | 908.48  | 125.702 | 1703   | 1 | 908.48  | -0.20  |
| [P17215]LIVJ_SALTY Leu/Ile/Val/Thr-binding protein | 12 |                      | KQDPSGAFVWTTYAALQSLQAGLNHSDDPAEIAK     | 289 | 34 | 37 | 226.88 | b3°b3b5°b5b7°b7b8°b8b9°b9b11°b11b13°b13b15b18y3y6y9y11y12°y12y13°y13y14y15°y15y17°y17y18°y18y19y20y21y22y24y25 | 3629.77 | 102.459 | 331752 | 4 | 908.20  | -4.04  |

|                                                                        |    |                                       |                                   |     |    |    |        |                                                                              |         |         |        |   |         |        |
|------------------------------------------------------------------------|----|---------------------------------------|-----------------------------------|-----|----|----|--------|------------------------------------------------------------------------------|---------|---------|--------|---|---------|--------|
| P17215 LIVJ_SALTY Leu/Ile/Val/Thr-binding protein                      | 13 | Carbamidomethyl+C(6); Oxidation+M(14) | TLLAGCIALSLSHMAFADDIK             | 4   | 21 | 5  | 38.1   | b6b7y5y6y9                                                                   | 2263.15 | 63.747  | 4501   | 3 | 755.06  | 2.70   |
| P25077 MDH_SALTY Malate dehydrogenase                                  | 1  | Carbamidomethyl+C(2)                  | ACVGIITNPVNTTVAIAAEVLKK           | 111 | 23 | 19 | 137.32 | b2b3b4b5b6b8b9b13*b13y1y3y12y13y15y16y18y20y21y23                            | 2382.34 | 104.538 | 213809 | 3 | 794.78  | -2.97  |
| P25077 MDH_SALTY Malate dehydrogenase                                  | 2  |                                       | NQLPSGSELSLYDIAPVTPGVAVDLSHIPTAVK | 21  | 33 | 26 | 83.04  | b1*b1b2*b2b3*b3b5b8b10*b10b12b13*b13b15*b15y1y2y3y5*y5y15y18y19y24y30y33     | 3388.81 | 93.864  | 174351 | 3 | 1130.27 | 1.66   |
| P25077 MDH_SALTY Malate dehydrogenase                                  | 3  |                                       | VAVLGAAGGIGQALALLK                | 2   | 19 | 24 | 247.52 | b2b3b5b6b7b8b9b10b17y1y2y3y4y5y6y7y9y10y11y12y13y15y17y19                    | 1735.09 | 119.595 | 138314 | 2 | 868.05  | 1.83   |
| P25077 MDH_SALTY Malate dehydrogenase                                  | 4  |                                       | FFSQPLLLGK                        | 262 | 10 | 9  | 61     | b2b3*b3y2y3y4y6y8y10                                                         | 1149.66 | 76.120  | 123683 | 2 | 575.33  | -8.18  |
| P25077 MDH_SALTY Malate dehydrogenase                                  | 5  |                                       | IQNAGTEVVEAK                      | 205 | 12 | 28 | 166.54 | b2*b2b3b4*b4b9*b9b10*b10*b10y1y2y3*y3y4y5y6y7y8*y8y9*y9y10*y10y11*y11y12*y12 | 1258.65 | 35.351  | 100360 | 2 | 629.83  | -7.18  |
| P25077 MDH_SALTY Malate dehydrogenase                                  | 6  |                                       | NLVQQIAK                          | 99  | 8  | 6  | 36.02  | b1b3*b3y3y6y8                                                                | 913.53  | 49.762  | 77672  | 2 | 457.27  | -13.90 |
| P25077 MDH_SALTY Malate dehydrogenase                                  | 7  |                                       | DIQLGEDFINK                       | 301 | 11 | 7  | 36.63  | b3y1y5*y5y7y8y11                                                             | 1291.65 | 68.419  | 67581  | 2 | 646.33  | -3.87  |
| P25077 MDH_SALTY Malate dehydrogenase                                  | 8  |                                       | AGGGSATLSMGQAAAR                  | 217 | 16 | 18 | 106.75 | b1b7*b7b16y5y6*y6y7*y7y8y9*y9*y9y10y11*y11y12y16                             | 1405.69 | 40.756  | 61887  | 2 | 703.35  | 1.56   |
| P25077 MDH_SALTY Malate dehydrogenase                                  | 9  |                                       | SIGTLSAFEQHSLDAMLDTLKK            | 279 | 22 | 7  | 50.94  | b2b9b10*b10b13b14b15                                                         | 2405.23 | 94.874  | 44688  | 3 | 802.42  | -1.32  |
| P25077 MDH_SALTY Malate dehydrogenase                                  | 10 |                                       | SDLFNVNAGIVK                      | 87  | 12 | 5  | 34.15  | b3y6y8y9y12                                                                  | 1276.69 | 70.077  | 37144  | 2 | 638.85  | -2.87  |
| P25077 MDH_SALTY Malate dehydrogenase                                  | 11 |                                       | KDIQLGEDFINK                      | 300 | 12 | 5  | 40.17  | b7b8b9y2y5                                                                   | 1419.75 | 49.789  | 14513  | 3 | 473.92  | 0.00   |
| P25077 MDH_SALTY Malate dehydrogenase                                  | 12 |                                       | FGLSLVR                           | 233 | 7  | 4  | 53.57  | y3y4y5y6                                                                     | 791.46  | 67.140  | 74781  | 2 | 396.23  | -19.51 |
| P25077 MDH_SALTY Malate dehydrogenase                                  | 13 |                                       | SNTFVAELKGK                       | 153 | 11 | 4  | 31.22  | b5b6*b6b8                                                                    | 1193.64 | 26.316  | 27549  | 3 | 398.55  | -11.15 |
| P25077 MDH_SALTY Malate dehydrogenase                                  | 14 |                                       | IKGFSGEDATPALEGADVVLISAGVAR       | 54  | 27 | 4  | 48.93  | y3y4y5y6                                                                     | 2643.40 | 87.103  | 25632  | 3 | 881.80  | -1.20  |
| P25077 MDH_SALTY Malate dehydrogenase                                  | 15 | Carbamidomethyl+C(11)                 | ALQGEKGVVECAAYVEGDGQYAR           | 240 | 22 | 7  | 52.64  | b12b13y3y5y7y9y10                                                            | 2399.13 | 52.659  | 23584  | 3 | 800.38  | -1.02  |
| P25077 MDH_SALTY Malate dehydrogenase                                  | 16 |                                       | AGGGSATLSMGQAAARFGLSLVR           | 217 | 23 | 3  | 23.09  | b7b8b15                                                                      | 2178.11 | 78.595  | 2330   | 3 | 726.71  | -15.02 |
| P0A283 PTGA_SALTY Glucose-ecific phohotransferase enzyme IIA component | 1  |                                       | STLTPVVISNMDEIKELIK               | 133 | 19 | 23 | 135.17 | b1b2*b2b3*b3b4*b4b13b19y2y3y4*y4y5y6y9y11*y11y12y13y15y16y19                 | 2130.16 | 92.552  | 284414 | 3 | 710.72  | -6.99  |
| P0A283 PTGA_SALTY Glucose-ecific phohotransferase enzyme IIA component | 2  |                                       | MVAPVDGTIGK                       | 59  | 11 | 18 | 144.52 | b1b2b3b7b8*b8b9b10y2y5*y5y6y7y8y9*y9y10y11                                   | 1087.57 | 46.914  | 140270 | 2 | 544.29  | -9.99  |
| P0A283 PTGA_SALTY Glucose-ecific phohotransferase enzyme IIA component | 3  |                                       | VGDPVIEFDLPLLEEK                  | 115 | 16 | 7  | 37.76  | b5y2y3y6y10y11y16                                                            | 1812.97 | 99.632  | 87998  | 2 | 906.99  | 5.25   |
| P0A283 PTGA_SALTY Glucose-ecific phohotransferase enzyme IIA component | 4  |                                       | STLTPVVISNMDEIK                   | 133 | 15 | 4  | 18.08  | b1b11b13y9                                                                   | 1646.85 | 86.390  | 6573   | 2 | 823.93  | -11.49 |

|                                                                        |    |                       |                                                       |     |    |    |        |                                                                                             |         |         |        |   |         |        |
|------------------------------------------------------------------------|----|-----------------------|-------------------------------------------------------|-----|----|----|--------|---------------------------------------------------------------------------------------------|---------|---------|--------|---|---------|--------|
| P0A283 PTGA_SALTY Glucose-ecific phohotransferase enzyme IIA component | 5  |                       | DTGTIEIVAPLSGEIVNIEDVPDVV FAEK                        | 16  | 29 | 3  | 11.5   | b4y3y8                                                                                      | 3069.60 | 111.314 | 3677   | 3 | 1023.87 | 3.74   |
| P0A283 PTGA_SALTY Glucose-ecific phohotransferase enzyme IIA component | 6  |                       | LSGSVTVGETPVIR                                        | 152 | 14 | 4  | 32.92  | b4b5y7y13                                                                                   | 1414.79 | 56.193  | 25495  | 2 | 707.90  | -1.04  |
| P0A283 PTGA_SALTY Glucose-ecific phohotransferase enzyme IIA component | 7  |                       | VKVGDPVIEFDLPLEEK                                     | 113 | 18 | 12 | 92.38  | b3b5b6b7y3°y3y4y6y8°y8y9y10                                                                 | 2040.11 | 95.124  | 118587 | 3 | 680.71  | -7.30  |
| P0A283 PTGA_SALTY Glucose-ecific phohotransferase enzyme IIA component | 8  |                       | VGDPVIEFDLPLEEKAK                                     | 115 | 18 | 3  | 24.45  | b3b6b7                                                                                      | 2012.07 | 91.585  | 17527  | 3 | 671.36  | -12.86 |
| P0A283 PTGA_SALTY Glucose-ecific phohotransferase enzyme IIA component | 9  |                       | LSGSVTVGETPVIRIK                                      | 152 | 16 | 3  | 24.8   | b7b10b12                                                                                    | 1655.95 | 58.553  | 12684  | 3 | 552.66  | -8.70  |
| P0A283 PTGA_SALTY Glucose-ecific phohotransferase enzyme IIA component | 10 | Phosphoryl STY(10)    | LSGSVTVGETPVIR                                        | 152 | 14 | 4  | 19.22  | b3b8°b8y3                                                                                   | 1494.74 | 50.714  | 3391   | 2 | 747.88  | -2.37  |
| P0A283 PTGA_SALTY Glucose-ecific phohotransferase enzyme IIA component | 11 |                       | STLTPVVISNMDEIKELIK                                   | 133 | 19 | 0  | 5.7    |                                                                                             | 2113.13 | 92.530  | 3136   | 3 | 705.05  | -7.05  |
| P64076 ENO_SALTY Enolase                                               | 1  |                       | FNQIGSLTETLAAIK                                       | 342 | 15 | 25 | 186.36 | b2*b2b3*b3b4*b4b5b7°b7°b7b9b12°b12b13°b13b15y3y4y6y7y8y11y12y13y15                          | 1605.89 | 85.736  | 320193 | 2 | 803.45  | 0.46   |
| P64076 ENO_SALTY Enolase                                               | 2  |                       | SGETEDATIADLAVGTAAGQIK                                | 371 | 22 | 32 | 257.06 | b2b4b8b11b12°b12b13°b13b14°b14b15b16b18b22y2y4y5y6y7y8y9°y9y12°y12y13y14°y14y15y16y17y18y22 | 2118.07 | 75.725  | 226900 | 2 | 1059.54 | 5.65   |
| P64076 ENO_SALTY Enolase                                               | 3  |                       | DAGYTAVISHR                                           | 360 | 11 | 15 | 110.36 | b2b3°b3b7b8y1y2y3y4y5y6y7y9°y9y11                                                           | 1189.59 | 42.127  | 114440 | 2 | 595.30  | -6.98  |
| P64076 ENO_SALTY Enolase                                               | 4  |                       | GMNTAVGDEGGYAPNLGSNAEA LAVIAEAVK                      | 200 | 31 | 23 | 126.77 | b2b3°b3b4°b4b5°b5b6°b6b12b16y1y2y4y5y6y7y8y10y14y15y18y31                                   | 2989.47 | 94.998  | 109309 | 3 | 997.16  | 4.41   |
| P64076 ENO_SALTY Enolase                                               | 5  |                       | AVGAVNGPIAQAILGK                                      | 66  | 16 | 6  | 28.25  | b3y2y5y10y11y16                                                                             | 1478.87 | 75.472  | 77377  | 2 | 739.94  | -2.31  |
| P64076 ENO_SALTY Enolase                                               | 6  |                       | YSMPVPMMNIIINGGEHADNNVDI QEFMIQPVGAK                  | 143 | 34 | 11 | 41.97  | b2°b2b3°b3b4b5°b5y5y13y29y34                                                                | 3759.79 | 98.382  | 72696  | 3 | 1253.94 | 7.92   |
| P64076 ENO_SALTY Enolase                                               | 7  |                       | IQLVGDDLFTVNTNK                                       | 311 | 14 | 8  | 27     | b2y2y4°y4y11°y11y12y14                                                                      | 1562.85 | 77.846  | 36300  | 2 | 781.93  | 1.64   |
| P64076 ENO_SALTY Enolase                                               | 8  |                       | ILKEGIEK                                              | 325 | 8  | 9  | 53.98  | b2y1y3°y3y4y5°y5y6y8                                                                        | 929.56  | 29.736  | 26850  | 2 | 465.28  | -12.15 |
| P64076 ENO_SALTY Enolase                                               | 9  | Carbamidomethyl+C(16) | AAGYELGKIDITLAMDCAASEFYK DGK                          | 231 | 26 | 10 | 36.55  | b2b3b5°b5b7b9b11°b11y2y6                                                                    | 2824.30 | 97.878  | 23241  | 4 | 706.83  | -7.00  |
| P64076 ENO_SALTY Enolase                                               | 10 |                       | GNPTVEAEVHLEGGFVGMAAAPS GASTGSR                       | 16  | 30 | 5  | 38.51  | b3y11y12y16y17                                                                              | 2856.34 | 87.453  | 10322  | 3 | 952.78  | -6.75  |
| P64076 ENO_SALTY Enolase                                               | 11 |                       | GMPLYEHIAELNGTPGK                                     | 126 | 17 | 4  | 36.85  | b15y3y4y5                                                                                   | 1826.88 | 67.564  | 86184  | 3 | 609.63  | -16.10 |
| P64076 ENO_SALTY Enolase                                               | 12 |                       | GIANSILIK                                             | 333 | 9  | 4  | 54.39  | y3y5y6y7                                                                                    | 928.57  | 61.037  | 81496  | 2 | 464.79  | -16.04 |
| P64076 ENO_SALTY Enolase                                               | 13 |                       | AFTSEEFTHFLEELTK                                      | 266 | 16 | 4  | 30.7   | b3b4y4y7                                                                                    | 1928.92 | 103.067 | 49125  | 3 | 643.64  | -5.63  |
| P64076 ENO_SALTY Enolase                                               | 14 |                       | IEEALGEK                                              | 411 | 8  | 4  | 49.21  | b3b5b6y4                                                                                    | 888.47  | 48.808  | 23283  | 1 | 888.47  | 6.66   |
| P64076 ENO_SALTY Enolase                                               | 15 |                       | EIIDSR                                                | 10  | 6  | 1  | 13.6   | y4                                                                                          | 732.39  | 27.368  | 12979  | 1 | 732.39  | 2.92   |
| P64076 ENO_SALTY Enolase                                               | 16 |                       | SNFGANAILAVSLANAK                                     | 103 | 17 | 6  | 23.66  | b3b5°b5°b5b11°b11                                                                           | 1660.89 | 78.664  | 4005   | 2 | 830.95  | -9.04  |
| P64076 ENO_SALTY Enolase                                               | 17 |                       | VLGDKIQLVGDDLFTVNTNK                                  | 306 | 19 | 11 | 73.4   | b4°b4b5b8b9y4°y4y5y6y10°y10                                                                 | 2075.12 | 79.673  | 102474 | 3 | 692.38  | -7.29  |
| P64076 ENO_SALTY Enolase                                               | 18 |                       | GMPLYEHIAELNGTPGKYSPMPVPMNIIINGGEHADNNVDIQEFMIQP VGAK | 126 | 51 | 15 | 52.64  | b6b8b10°b10b14b20b22y5y6°y6y8y9y13°y13y24                                                   | 5567.66 | 97.884  | 88843  | 5 | 1114.34 | 1.05   |
| P64076 ENO_SALTY Enolase                                               | 19 |                       | DGKYVLAGEGNK                                          | 254 | 12 | 6  | 37.16  | b11y3y6°y6y9°y9                                                                             | 1250.62 | 44.376  | 67886  | 2 | 625.82  | -11.13 |



|                                                |    |                      |                                          |     |    |    |        |                                      |         |         |       |   |         |        |
|------------------------------------------------|----|----------------------|------------------------------------------|-----|----|----|--------|--------------------------------------|---------|---------|-------|---|---------|--------|
| P64076 ENO_SALTY Enolase                       | 20 |                      | GKGMNTAVGDEGGYAPNLGSNA<br>EALAVIAEAVK    | 198 | 33 | 4  | 21.56  | b4b5b15y5                            | 3174.59 | 89.865  | 28430 | 3 | 1058.87 | 5.23   |
| P64076 ENO_SALTY Enolase                       | 21 |                      | EIIDSRGNPTVEAEVHLEGGFVGM<br>AAAPSGASTGSR | 10  | 36 | 8  | 27.03  | b5°b5b7b8°b8y9y15y17                 | 3569.77 | 104.502 | 13262 | 3 | 1190.59 | 10.40  |
| P64076 ENO_SALTY Enolase                       | 22 |                      | SGETEDATIADLAVGTAAGQIKTG<br>SMSR         | 371 | 28 | 5  | 38.91  | b15y5y6y11y12                        | 2737.34 | 74.283  | 11544 | 3 | 913.12  | 4.73   |
| P64076 ENO_SALTY Enolase                       | 23 |                      | IEEALGEKAPYNGR                           | 411 | 14 | 6  | 45.3   | b9y4y5y6y9°y9                        | 1546.76 | 40.307  | 6156  | 3 | 516.26  | -14.44 |
| P64076 ENO_SALTY Enolase                       | 24 |                      | AAAAAKGMPLYEHIAELNGTPGK                  | 120 | 23 | 5  | 20.05  | b3b8b12y8*y8                         | 2310.16 | 106.952 | 4677  | 2 | 1155.58 | -14.80 |
| P64076 ENO_SALTY Enolase                       | 25 |                      | YVLAGEGNKAFSTSEEFTHFLELT<br>K            | 257 | 25 | 4  | 21.91  | b12b13°b13y9                         | 2860.42 | 109.371 | 2442  | 3 | 954.15  | 6.57   |
| P64076 ENO_SALTY Enolase                       | 26 | Oxidation+M(1)       | MAKDAGYTAVISHR                           | 357 | 14 | 3  | 19.22  | b3b10y11                             | 1535.78 | 51.284  | 1950  | 2 | 768.39  | 12.24  |
| P64076 ENO_SALTY Enolase                       | 27 |                      | GYTAVISHR                                | 362 | 9  | 3  | 18.82  | b3°b3b8                              | 1003.53 | 42.150  | 44605 | 2 | 502.27  | -3.10  |
| P64076 ENO_SALTY Enolase                       | 28 |                      | AGYTAVISHR                               | 361 | 10 | 4  | 35.99  | b3b5°b5b9                            | 1074.57 | 42.122  | 20158 | 2 | 537.79  | -3.29  |
| P64076 ENO_SALTY Enolase                       | 29 |                      | LKEGIEK                                  | 326 | 7  | 0  | 1.22   |                                      | 816.47  | 29.758  | 20062 | 2 | 408.74  | -14.28 |
| P64076 ENO_SALTY Enolase                       | 30 |                      | NTAVGDEGGYAPNLGSNAEALAV<br>IAEAVK        | 202 | 29 | 3  | 12.19  | b3°b3b16                             | 2801.43 | 95.018  | 4605  | 3 | 934.48  | 12.11  |
| P64076 ENO_SALTY Enolase                       | 31 |                      | DAGYTAVISHR                              | 360 | 11 | 0  | 2.44   |                                      | 1171.58 | 42.131  | 1795  | 3 | 391.20  | 1.15   |
| P0A297 RL10_SALTY 50S ribosomal<br>protein L10 | 1  |                      | LATLPTYEEAIAIR                           | 125 | 13 | 13 | 101.17 | b2b3°b3b10b12y2y4y7y8y<br>9y10y11y13 | 1447.78 | 65.750  | 78423 | 2 | 724.39  | -2.61  |
| P0A297 RL10_SALTY 50S ribosomal<br>protein L10 | 2  | Carbamidomethyl+C(9) | VVEGTQFECCLKDTFVGPTLIAYSM<br>EHPGAAAR    | 62  | 32 | 7  | 27.18  | b3b8y7y10y11y17y32                   | 3494.70 | 92.244  | 53856 | 4 | 874.43  | -2.72  |
| P0A297 RL10_SALTY 50S ribosomal<br>protein L10 | 3  |                      | AAAFEGELIPASQIDR                         | 109 | 16 | 9  | 86.57  | b4y5y7y8y9y10y11y12y16               | 1687.88 | 69.207  | 51297 | 2 | 844.44  | 6.08   |
| P0A297 RL10_SALTY 50S ribosomal<br>protein L10 | 4  |                      | GALSAVVADSR                              | 20  | 11 | 9  | 70.79  | b6y4y5y6°y6y7y8°y8y11                | 1045.58 | 48.977  | 29515 | 2 | 523.29  | 12.26  |
| P0A297 RL10_SALTY 50S ribosomal<br>protein L10 | 5  |                      | AGREAGVYMR                               | 43  | 10 | 6  | 73.39  | b4b8y3y6y7y9                         | 1109.56 | 46.919  | 11727 | 2 | 555.28  | 3.52   |
| P0A297 RL10_SALTY 50S ribosomal<br>protein L10 | 6  |                      | QAIVAEVSEVAK                             | 8   | 12 | 4  | 35.43  | b12y8y9y10                           | 1243.68 | 57.947  | 10667 | 2 | 622.35  | -3.83  |
| P0A297 RL10_SALTY 50S ribosomal<br>protein L10 | 7  |                      | DTFVGPTLIAYSMHPGAAAR                     | 73  | 21 | 3  | 13.83  | b7b12y5                              | 2204.08 | 82.634  | 5673  | 3 | 735.37  | 0.11   |
| P0A297 RL10_SALTY 50S ribosomal<br>protein L10 | 8  |                      | EAGVYMR                                  | 46  | 7  | 4  | 40.38  | b5y3y6y7                             | 825.39  | 32.985  | 5606  | 2 | 413.20  | -5.40  |
| P0A297 RL10_SALTY 50S ribosomal<br>protein L10 | 9  |                      | LMATMK                                   | 138 | 6  | 2  | 26.79  | b5y4                                 | 694.37  | 41.635  | 13930 | 1 | 694.37  | 11.78  |
| P0A297 RL10_SALTY 50S ribosomal<br>protein L10 | 10 |                      | EFAK                                     | 97  | 4  | 1  | 12.78  | b3                                   | 494.26  | 42.144  | 2976  | 1 | 494.26  | 5.62   |
| P0A297 RL10_SALTY 50S ribosomal<br>protein L10 | 11 |                      | ALNLQDKQAIVAEVSEVAK                      | 1   | 19 | 3  | 22.67  | b9y8y9                               | 2026.09 | 71.777  | 30344 | 3 | 676.04  | -12.47 |
| P0A297 RL10_SALTY 50S ribosomal<br>protein L10 | 12 |                      | AAAFEGELIPASQIDRLATLPTYEE<br>AIAIR       | 109 | 29 | 12 | 55.92  | b3b5b6b10°b10b14y4y9°y9<br>y10y20y25 | 3116.64 | 92.923  | 27194 | 3 | 1039.55 | 3.53   |
| P0A297 RL10_SALTY 50S ribosomal<br>protein L10 | 13 |                      | FEVKAAAFEGELIPASQIDR                     | 105 | 20 | 3  | 21.11  | b4b6b9                               | 2191.12 | 96.417  | 14840 | 2 | 1096.07 | -7.13  |
| P0A297 RL10_SALTY 50S ribosomal<br>protein L10 | 14 |                      | LMATMKEASAGK                             | 138 | 12 | 4  | 26.19  | b8°b8y8y9                            | 1237.63 | 98.749  | 9672  | 1 | 1237.63 | 1.48   |
| P0A297 RL10_SALTY 50S ribosomal<br>protein L10 | 15 |                      | AGREAGVYMR                               | 43  | 10 | 5  | 40.02  | b4b5°b5b9y6                          | 1109.55 | 74.936  | 5702  | 2 | 555.28  | -1.32  |
| P0A297 RL10_SALTY 50S ribosomal<br>protein L10 | 16 | Phosphoryl.STY(6)    | LATLPTYEEAIAIR                           | 125 | 13 | 3  | 28.05  | y6y7y11                              | 1527.74 | 73.834  | 11796 | 2 | 764.37  | 2.96   |
| P0A297 RL10_SALTY 50S ribosomal<br>protein L10 | 17 | Phosphoryl.STY(4)    | GALSAVVADSR                              | 20  | 11 | 5  | 50.61  | b7b8y6y7y9_H3PO4<br>y9_HPO3 y9       | 1125.53 | 46.905  | 10855 | 2 | 563.27  | 10.52  |
| P0A297 RL10_SALTY 50S ribosomal<br>protein L10 | 18 | Oxidation+M(13)      | DTFVGPTLIAYSMHPGAAAR                     | 73  | 21 | 4  | 35.77  | b14y8y9y10                           | 2220.07 | 70.419  | 18749 | 3 | 740.69  | -3.41  |
| P0A297 RL10_SALTY 50S ribosomal<br>protein L10 | 19 | Oxidation+M()        | LMATMKEASAGK                             | 138 | 12 | 8  | 47.04  | b5°b5b9y4°y4y6°y6y8                  | 1253.61 | 31.681  | 6318  | 2 | 627.31  | -13.63 |

|                                                         |    |                      |                              |     |    |    |        |                                                                    |         |         |        |   |         |        |
|---------------------------------------------------------|----|----------------------|------------------------------|-----|----|----|--------|--------------------------------------------------------------------|---------|---------|--------|---|---------|--------|
| P02910 HISJ_SALTY Histidine-binding periplasmic protein | 1  |                      | VGVLQGTTQETFGNEHWAPK         | 135 | 20 | 21 | 184.71 | b1b2b3b4y1y2y3y4y5y8y9y10y11*y11y12y14y15y16y17y19y20              | 2199.06 | 63.906  | 184466 | 3 | 733.69  | -8.33  |
| P02910 HISJ_SALTY Histidine-binding periplasmic protein | 2  |                      | IGTDPITYAPFESK               | 29  | 13 | 20 | 146.76 | b2b3*b3b4b8b13y2*y2y4y5*y5y6y7y8*y8y9y10y11y12y13                  | 1425.69 | 56.199  | 123976 | 2 | 713.35  | 0.09   |
| P02910 HISJ_SALTY Histidine-binding periplasmic protein | 3  |                      | NSDIQPTVASLK                 | 120 | 12 | 19 | 123.96 | b2*b2b3*b3b4*b4b5b11*b11*b11y3y4y5y8*y8y9y10*y10y12                | 1272.68 | 48.911  | 102188 | 2 | 636.84  | -1.25  |
| P02910 HISJ_SALTY Histidine-binding periplasmic protein | 4  | Carbamidomethyl+C(5) | INTQCTFVENPLDALISLK          | 62  | 20 | 21 | 113.72 | b2b3*b3b8*b8b10*b10b14b16*b16y1y2y3y4*y4y5y6y7y10y13y20            | 2273.21 | 103.735 | 94035  | 2 | 1137.11 | 11.49  |
| P02910 HISJ_SALTY Histidine-binding periplasmic protein | 5  |                      | FGGPAVKDEK                   | 201 | 10 | 7  | 43.03  | b2b8*b8y3y4y5y10                                                   | 1047.54 | 27.289  | 25224  | 2 | 524.27  | -6.06  |
| P02910 HISJ_SALTY Histidine-binding periplasmic protein | 6  |                      | GIEIVSYQGQDNIYSDLTAGR        | 155 | 21 | 3  | 13.83  | b3b8y3                                                             | 2299.15 | 79.012  | 12035  | 2 | 1150.08 | 10.94  |
| P02910 HISJ_SALTY Histidine-binding periplasmic protein | 7  |                      | NAQGELVGFDIDLAK              | 42  | 15 | 5  | 43     | b5b11b13y7y8                                                       | 1589.82 | 79.654  | 29809  | 2 | 795.41  | 3.07   |
| P02910 HISJ_SALTY Histidine-binding periplasmic protein | 8  |                      | QQEIAFTDK                    | 99  | 9  | 3  | 30.41  | b5y3y7                                                             | 1079.54 | 43.624  | 16742  | 2 | 540.27  | 1.81   |
| P02910 HISJ_SALTY Histidine-binding periplasmic protein | 9  |                      | AFAEMR                       | 234 | 6  | 1  | 13.6   | y4                                                                 | 724.34  | 36.792  | 7472   | 1 | 724.34  | -5.31  |
| P02910 HISJ_SALTY Histidine-binding periplasmic protein | 10 |                      | FGGPAVK                      | 201 | 7  | 4  | 56.58  | b4b6y5y6                                                           | 675.37  | 44.282  | 5360   | 1 | 675.37  | -17.71 |
| P02910 HISJ_SALTY Histidine-binding periplasmic protein | 11 |                      | IDAAFQDEVAASEGFLK            | 176 | 17 | 4  | 33.63  | b4b7b14b15                                                         | 1810.93 | 97.920  | 2914   | 2 | 905.97  | 22.45  |
| P02910 HISJ_SALTY Histidine-binding periplasmic protein | 12 |                      | QPVGKDYK                     | 193 | 8  | 5  | 33.01  | b3y4*y4y5*y5                                                       | 934.50  | 50.657  | 17736  | 2 | 467.76  | 5.36   |
| P02910 HISJ_SALTY Histidine-binding periplasmic protein | 13 |                      | IGTDPITYAPFESKNAQGLVGFDIDLAK | 29  | 28 | 3  | 11.68  | b9b14y15                                                           | 2996.52 | 85.053  | 11160  | 3 | 999.51  | 11.16  |
| P02910 HISJ_SALTY Histidine-binding periplasmic protein | 14 |                      | QQEIAFTDKLYAADSR             | 99  | 16 | 3  | 17.1   | b9b14y11                                                           | 1855.91 | 84.469  | 3658   | 3 | 619.31  | -5.99  |
| P02910 HISJ_SALTY Histidine-binding periplasmic protein | 15 |                      | DEKLFGVGTGMGLR               | 208 | 14 | 4  | 27     | b7b9b10*b10                                                        | 1479.75 | 59.766  | 3604   | 2 | 740.38  | -8.91  |
| P02910 HISJ_SALTY Histidine-binding periplasmic protein | 16 |                      | GGPAVKDEK                    | 202 | 9  | 0  | 2.04   |                                                                    | 900.47  | 27.281  | 9196   | 2 | 450.74  | -9.69  |
| P06179 FLIC_SALTY Flagellin                             | 1  |                      | AQILQQAGTSVLAQANQVPQNVLSLLR  | 468 | 27 | 26 | 182.68 | b2*b2b3b4b5*b5b6b7*b7b11*b11b12b13b17b18y1y2y3y4y5y6y9y10y12y13y27 | 2860.61 | 105.253 | 87276  | 3 | 954.21  | 2.90   |
| P06179 FLIC_SALTY Flagellin                             | 2  |                      | FNSAITNLGNVTNNLTSAR          | 432 | 19 | 20 | 137.13 | b2b4b5b6*b6b12*b12b13*b13b14y2y3y4y7*y7y8y13y14y17y19              | 2007.03 | 78.579  | 46600  | 2 | 1004.02 | 4.01   |
| P06179 FLIC_SALTY Flagellin                             | 3  |                      | NANDGISIAQTTEGALNEINNNLQR    | 66  | 25 | 8  | 12.37  | b6*b6*b6b14*b14*b14y14y25                                          | 2670.34 | 86.747  | 45033  | 2 | 1335.67 | 11.25  |
| P06179 FLIC_SALTY Flagellin                             | 4  |                      | AQVINTNSLSLLTQNNLNK          | 1   | 19 | 8  | 22.67  | b2*b2b7*b7b8y1y15y19                                               | 2085.14 | 75.112  | 44705  | 2 | 1043.08 | 6.44   |
| P06179 FLIC_SALTY Flagellin                             | 5  |                      | SQSALGTAIER                  | 20  | 11 | 9  | 36.63  | b2*b2b10y1y6*y6y7y9y11                                             | 1132.59 | 42.781  | 41795  | 2 | 566.80  | -6.79  |
| P06179 FLIC_SALTY Flagellin                             | 6  |                      | ELAVQSANSTNSQSDLDLSIAEITQR   | 93  | 26 | 10 | 21.85  | b2b6*b6*b6b13*b13y6y10y12y26                                       | 2805.36 | 70.929  | 16642  | 3 | 935.79  | 2.87   |
| P06179 FLIC_SALTY Flagellin                             | 7  |                      | QINSQTLGLDVLNVQQK            | 161 | 17 | 7  | 34.45  | b4*b4*b4b5*b5b6*b6                                                 | 1900.03 | 94.935  | 11879  | 3 | 634.02  | 10.60  |
| P06179 FLIC_SALTY Flagellin                             | 8  |                      | IDAALAQVDTLR                 | 411 | 12 | 4  | 29.41  | b4*b4b6b7                                                          | 1285.71 | 84.698  | 8814   | 2 | 643.36  | 2.85   |
| P06179 FLIC_SALTY Flagellin                             | 9  |                      | LNEIDR                       | 119 | 6  | 4  | 39.98  | b3b4b5*b5                                                          | 759.40  | 96.887  | 14100  | 1 | 759.40  | -4.82  |
| P06179 FLIC_SALTY Flagellin                             | 10 |                      | TYAASK                       | 379 | 6  | 1  | 13.6   | y5                                                                 | 640.34  | 50.868  | 4153   | 1 | 640.34  | 12.49  |
| P06179 FLIC_SALTY Flagellin                             | 11 |                      | NVQVANADLTEAK                | 280 | 13 | 4  | 25.34  | b9b10y5*y5                                                         | 1372.71 | 42.138  | 2275   | 3 | 458.24  | 1.87   |
| P06179 FLIC_SALTY Flagellin                             | 12 |                      | ASATGLGGTDQK                 | 204 | 12 | 3  | 26.19  | b10y5y6                                                            | 1105.54 | 104.614 | 1914   | 1 | 1105.54 | -6.51  |
| P06179 FLIC_SALTY Flagellin                             | 13 |                      | AQPDLAEEAAATTENPLQK          | 392 | 19 | 6  | 50.62  | b10b11b12y7y9y12                                                   | 1968.99 | 67.931  | 1649   | 2 | 985.00  | -0.74  |

|                                              |    |                    |                                  |     |    |    |        |                                                                     |         |         |       |   |         |        |
|----------------------------------------------|----|--------------------|----------------------------------|-----|----|----|--------|---------------------------------------------------------------------|---------|---------|-------|---|---------|--------|
| P06179 FLIC_SALTY Flagellin                  | 14 |                    | VSDTAATVTGYADTTIALDNSTF<br>K     | 180 | 24 | 5  | 19.38  | b9°b9y6y11y16                                                       | 2462.19 | 74.104  | 1624  | 3 | 821.40  | -3.27  |
| P06179 FLIC_SALTY Flagellin                  | 15 |                    | LGGADGKTEVVSIGGK                 | 363 | 16 | 5  | 45.54  | b7b8b10b11y9                                                        | 1487.79 | 43.541  | 38645 | 3 | 496.60  | -14.28 |
| P06179 FLIC_SALTY Flagellin                  | 16 |                    | TYAASKAEGHNFK                    | 379 | 13 | 4  | 20.57  | b3°b3b6y9                                                           | 1423.71 | 41.646  | 31768 | 2 | 712.36  | 7.55   |
| P06179 FLIC_SALTY Flagellin                  | 17 |                    | IDAALAQVDTLRSDLGAVQNR            | 411 | 21 | 5  | 23.48  | y9°y9*y9y10y18                                                      | 2226.19 | 63.870  | 15781 | 3 | 742.73  | 1.43   |
| P06179 FLIC_SALTY Flagellin                  | 18 |                    | FNSAITNLGNTVNNLTSARSR            | 432 | 21 | 7  | 31.09  | b3b7b10*b10b11°b11y13                                               | 2250.18 | 112.150 | 6203  | 2 | 1125.59 | 7.60   |
| P06179 FLIC_SALTY Flagellin                  | 19 |                    | YKVSDTAATVTGYADTTIALDNS<br>TFK   | 178 | 26 | 6  | 32.48  | b6b10b12y5y6y16                                                     | 2753.37 | 98.813  | 4868  | 3 | 918.46  | 5.05   |
| P06179 FLIC_SALTY Flagellin                  | 20 |                    | AEGHNFKAQPDLAEEAAATTTENP<br>LQK  | 385 | 26 | 5  | 39.46  | b7b8b10b11*b11                                                      | 2752.32 | 126.414 | 2677  | 3 | 918.11  | -13.22 |
| P06179 FLIC_SALTY Flagellin                  | 21 | Phosphoryl STY(6)  | QINSQTLGLDTLNVQQK                | 161 | 17 | 6  | 26.06  | b5y8*y8y12*y12y15                                                   | 1979.97 | 99.755  | 27223 | 3 | 660.66  | -2.03  |
| P06179 FLIC_SALTY Flagellin                  | 22 | Phosphoryl STY(13) | AQPDLAEEAAATTTENPLQK             | 392 | 19 | 5  | 41.05  | b4b5b11*b11b12                                                      | 2048.94 | 62.034  | 2202  | 3 | 683.65  | -1.07  |
| P06179 FLIC_SALTY Flagellin                  | 23 | Phosphoryl STY(13) | TNGEVLTAGGATSPLTGGLPATA<br>TEDVK | 252 | 28 | 4  | 14.85  | b8b12y7y16                                                          | 2708.32 | 102.518 | 1831  | 4 | 677.84  | 10.10  |
| P06179 FLIC_SALTY Flagellin                  | 24 | Phosphoryl STY(11) | FNSAITNLGNTVNNLTSAR              | 432 | 19 | 5  | 31.52  | b7b10y9y10y14                                                       | 2086.98 | 67.039  | 1804  | 4 | 522.50  | -0.70  |
| P06179 FLIC_SALTY Flagellin                  | 25 |                    | IDAALAQVDTLR                     | 411 | 12 | 0  | 2.85   |                                                                     | 1267.69 | 84.674  | 1743  | 2 | 634.35  | -5.78  |
| P02906 SUBI_SALTY Sulfate-binding<br>protein | 1  |                    | YLYSPEGQEIAAK                    | 263 | 13 | 22 | 129.77 | b2b3b4°b4b7°b7b10°b10b1<br>1y1y2y3y7y8°y8*y8y9y10*<br>y10y11°y11y13 | 1468.73 | 51.438  | 66060 | 2 | 734.87  | -0.08  |
| P02906 SUBI_SALTY Sulfate-binding<br>protein | 2  |                    | NVEVLDSGAR                       | 183 | 10 | 9  | 57.98  | b2*b2b6*b6y4y6y7y8y10                                               | 1059.54 | 40.784  | 50282 | 2 | 530.27  | -5.41  |
| P02906 SUBI_SALTY Sulfate-binding<br>protein | 3  |                    | GIGDVLIAWENEALLATNELGK           | 202 | 22 | 6  | 13.39  | b4b13y1y7°y7y22                                                     | 2326.21 | 91.234  | 35727 | 2 | 1163.61 | -7.35  |
| P02906 SUBI_SALTY Sulfate-binding<br>protein | 4  |                    | QATSVINGIEADVVTALAYDVD<br>AIAER  | 66  | 28 | 12 | 129.37 | b2b11y3y4y5y6y7y8y9y10<br>y11y12                                    | 2917.52 | 127.948 | 13647 | 3 | 973.18  | 0.25   |
| P02906 SUBI_SALTY Sulfate-binding<br>protein | 5  |                    | QETGDNVVIR                       | 48  | 10 | 5  | 39.23  | b3°b3b6y3y8                                                         | 1130.58 | 36.141  | 12608 | 2 | 565.79  | -3.78  |
| P02906 SUBI_SALTY Sulfate-binding<br>protein | 6  |                    | WNYLAAWGYALHHNNNDQAK             | 153 | 20 | 5  | 14.32  | b2*b2b11y7y10                                                       | 2386.12 | 78.722  | 7748  | 3 | 796.05  | 5.01   |
| P02906 SUBI_SALTY Sulfate-binding<br>protein | 7  |                    | LPDNSAPYTSTIVFLVR                | 104 | 17 | 5  | 24.91  | b4b6°b6b7°b7                                                        | 1893.02 | 86.344  | 2642  | 2 | 947.01  | 2.51   |
| P02906 SUBI_SALTY Sulfate-binding<br>protein | 8  |                    | QIHDWNLIKPGVSVITPNPK             | 126 | 21 | 6  | 51.59  | b5b6b9y4y5y6                                                        | 2371.23 | 73.104  | 83315 | 4 | 593.56  | -18.43 |
| P02906 SUBI_SALTY Sulfate-binding<br>protein | 9  |                    | FEIVTPSESILAEPVSVDK              | 226 | 21 | 5  | 24.63  | b8b13b14y5°y5                                                       | 2260.23 | 77.422  | 74904 | 3 | 754.08  | 13.07  |
| P02906 SUBI_SALTY Sulfate-binding<br>protein | 10 |                    | LFTIDEVFGGWAK                    | 298 | 13 | 4  | 20.57  | b3°b3b8y8                                                           | 1482.76 | 101.981 | 55990 | 2 | 741.88  | -1.15  |
| P02906 SUBI_SALTY Sulfate-binding<br>protein | 11 |                    | NFYRPR                           | 276 | 6  | 1  | 13.6   | b5                                                                  | 852.44  | 30.199  | 11055 | 2 | 426.72  | -11.74 |
| P02906 SUBI_SALTY Sulfate-binding<br>protein | 12 |                    | VVEK                             | 247 | 4  | 1  | 12.78  | b3                                                                  | 474.30  | 67.129  | 8744  | 1 | 474.30  | 7.08   |
| P02906 SUBI_SALTY Sulfate-binding<br>protein | 13 |                    | DIQLLNVSYPTR                     | 20  | 13 | 6  | 33.97  | b3y4y9y11°y11*y11                                                   | 1533.77 | 82.798  | 8428  | 2 | 767.39  | -13.93 |
| P02906 SUBI_SALTY Sulfate-binding<br>protein | 14 |                    | GSTNTFVER                        | 193 | 9  | 4  | 54.39  | y3y4y5y7                                                            | 1010.49 | 32.979  | 3038  | 1 | 1010.49 | -1.87  |
| P02906 SUBI_SALTY Sulfate-binding<br>protein | 15 |                    | RLPDNSAPYTSTIVFLVR               | 103 | 18 | 5  | 26.5   | b7b9b10°b10y5                                                       | 2049.09 | 82.763  | 30468 | 3 | 683.70  | -9.77  |
| P02906 SUBI_SALTY Sulfate-binding<br>protein | 16 |                    | ELYEQYNKAFAHWK                   | 33  | 15 | 4  | 18.08  | b9y5y11*y11                                                         | 1913.92 | 98.282  | 4081  | 2 | 957.46  | -0.06  |
| P02906 SUBI_SALTY Sulfate-binding<br>protein | 17 |                    | AVAEAYLKLYSPEGQEIAAK             | 255 | 21 | 6  | 49.24  | b11b12y8y9y10°y10                                                   | 2314.23 | 114.593 | 2311  | 3 | 772.08  | 13.50  |
| P02906 SUBI_SALTY Sulfate-binding<br>protein | 18 |                    | QETGDNVVIRQSHGGSGK               | 48  | 18 | 11 | 56.24  | b4*b4b8y6y7°y7y8°y8y9°y<br>9*y9                                     | 1868.90 | 35.332  | 1792  | 3 | 623.64  | -12.34 |

|                                              |    |                   |                            |     |    |    |        |                                                                             |         |         |        |   |        |        |
|----------------------------------------------|----|-------------------|----------------------------|-----|----|----|--------|-----------------------------------------------------------------------------|---------|---------|--------|---|--------|--------|
| [P41031 CY_SALTY Thiosulfate-binding protein | 1  |                   | AYLNWLYSPQAQTIIHHYYR       | 265 | 21 | 25 | 259.17 | b2b3b4b5*b5b6y2y3y4y5y6y7y8y9*y9y10y11y12y13y14y15y16y17y18y21              | 2664.32 | 93.121  | 194702 | 3 | 888.78 | -2.75  |
| [P41031 CY_SALTY Thiosulfate-binding protein | 2  |                   | GLGDVLISFESEVNNIRK         | 208 | 18 | 14 | 103.55 | b2b3b4b5y2y5y6y8*y8y9y11y13y16y18                                           | 1990.04 | 101.229 | 137259 | 3 | 664.02 | -11.53 |
| [P41031 CY_SALTY Thiosulfate-binding protein | 3  |                   | LPNNSSPFYSTMGFLVR          | 110 | 17 | 14 | 80.83  | b2b4b7b8*b8y1y2y3y5y6y11y12y13y17                                           | 1929.97 | 92.038  | 119017 | 2 | 965.49 | 7.40   |
| [P41031 CY_SALTY Thiosulfate-binding protein | 4  |                   | FGSWPEVMK                  | 311 | 9  | 10 | 61.56  | b2b3*b3y1y2y5y6y7y8y9                                                       | 1080.51 | 69.135  | 113458 | 2 | 540.76 | -5.76  |
| [P41031 CY_SALTY Thiosulfate-binding protein | 5  |                   | QYEAQGFEVVIPK              | 226 | 13 | 19 | 102.93 | b2*b2b3*b3b10*b10*b10b11*b11*b11b12b13y2y3y5y8y10y11y13                     | 1507.77 | 70.349  | 96798  | 2 | 754.39 | -4.61  |
| [P41031 CY_SALTY Thiosulfate-binding protein | 6  |                   | VNNPEIMGK                  | 286 | 9  | 16 | 74.75  | b1b2*b2b3*b3y2y3y4y6y7*y7*y7y8*y8y9*y9                                      | 1001.50 | 36.904  | 96714  | 2 | 501.25 | -11.34 |
| [P41031 CY_SALTY Thiosulfate-binding protein | 7  |                   | TEQFMTQFLK                 | 179 | 10 | 14 | 74.18  | b1b2b3*b3y2y3y5y6y7*y7y8*y8*y8y10                                           | 1272.63 | 75.765  | 95602  | 2 | 636.82 | -1.44  |
| [P41031 CY_SALTY Thiosulfate-binding protein | 8  |                   | ELFAALNPPFEQQWAK           | 37  | 16 | 12 | 63.76  | b3b6b7*b7y1y8y9*y9y12y13*y13y16                                             | 1888.97 | 89.846  | 78829  | 2 | 944.99 | 5.95   |
| [P41031 CY_SALTY Thiosulfate-binding protein | 9  |                   | NVEVFDTGGR                 | 189 | 10 | 12 | 83.57  | b2b4*b4b5b8*b8y4y6y7y8*y8y10                                                | 1093.53 | 47.938  | 63586  | 2 | 547.27 | -1.90  |
| [P41031 CY_SALTY Thiosulfate-binding protein | 10 |                   | QALAILQLK                  | 71  | 10 | 8  | 74.18  | b3*b3b10y3y5y6y7y8                                                          | 1054.65 | 75.300  | 54210  | 2 | 527.83 | -9.95  |
| [P41031 CY_SALTY Thiosulfate-binding protein | 11 |                   | ADVVTYNQVTDVQILHDK         | 81  | 18 | 9  | 32.49  | b2*b2b3b4b6b10*b10y1y18                                                     | 2058.03 | 64.360  | 9399   | 3 | 686.68 | -11.15 |
| [P41031 CY_SALTY Thiosulfate-binding protein | 12 |                   | TNLAIEFPVAWVDK             | 239 | 14 | 6  | 31.44  | b2b8y4y9y11y14                                                              | 1602.85 | 97.284  | 9357   | 2 | 801.93 | -1.52  |
| [P41031 CY_SALTY Thiosulfate-binding protein | 13 |                   | GATTTFAER                  | 199 | 9  | 6  | 30.41  | b7*b7b8*b8y7*y7                                                             | 953.47  | 123.341 | 3755   | 1 | 953.47 | 5.76   |
| [P41031 CY_SALTY Thiosulfate-binding protein | 14 |                   | THFASGGELDK                | 320 | 11 | 6  | 60     | b4b5b9y4y6y7                                                                | 1161.55 | 80.928  | 1512   | 2 | 581.28 | -4.20  |
| [P41031 CY_SALTY Thiosulfate-binding protein | 15 |                   | TNLAIEFPVAWVDKNVQANGTEK    | 239 | 23 | 28 | 210.73 | b3*b3b4b5*b5b6*b6*b6b7*b7y4y6*y6y7*y7y8*y8*y8y9y10y12y13*y13y16y17y18y19y20 | 2544.31 | 90.580  | 265982 | 3 | 848.77 | -1.15  |
| [P41031 CY_SALTY Thiosulfate-binding protein | 16 |                   | LIPADWQSRPLNNSSPFYSTMGFLVR | 101 | 26 | 7  | 56.1   | y3y5y9y11y12y21y24                                                          | 2996.52 | 95.815  | 72047  | 3 | 999.51 | 3.99   |
| [P41031 CY_SALTY Thiosulfate-binding protein | 17 |                   | NVEVFDTGGRGATTTFAER        | 189 | 19 | 20 | 170.29 | b3b5*b5*b5b6b8b9b10b11b13*b13y3y4y5y6y9*y9y13y15y17                         | 2027.96 | 57.288  | 48439  | 3 | 676.66 | -7.10  |
| [P41031 CY_SALTY Thiosulfate-binding protein | 18 |                   | VEEKFGSWPEVMK              | 307 | 13 | 3  | 25.34  | b3b4y8                                                                      | 1565.77 | 47.515  | 2009   | 2 | 783.39 | -0.55  |
| [P41031 CY_SALTY Thiosulfate-binding protein | 19 | Phosphoryl STY(8) | GLGDVLISFESEVNNIR          | 208 | 17 | 3  | 16.26  | b3b8y8                                                                      | 1941.95 | 60.826  | 5299   | 4 | 486.24 | 12.95  |
| [P41031 CY_SALTY Thiosulfate-binding protein | 20 | Oxidation+M(7)    | VNNPEIMGK                  | 286 | 9  | 5  | 38.19  | b3b4*b4b8*b8                                                                | 1017.49 | 74.371  | 3120   | 2 | 509.25 | -10.80 |
| [P41031 CY_SALTY Thiosulfate-binding protein | 21 |                   | DVLISFESEVNNIRK            | 211 | 15 | 1  | 7.34   | b7                                                                          | 1762.93 | 101.244 | 3146   | 2 | 881.97 | -1.73  |
| [P41031 CY_SALTY Thiosulfate-binding protein | 22 |                   | NPEIMGK                    | 288 | 7  | 2  | 8.8    | b4*b4                                                                       | 788.41  | 36.895  | 2983   | 1 | 788.41 | 13.94  |
| [P41031 CY_SALTY Thiosulfate-binding protein | 23 |                   | EVFDTGGR                   | 191 | 8  | 0  | 2.04   |                                                                             | 880.41  | 47.921  | 2667   | 1 | 880.41 | -4.78  |
| [P41031 CY_SALTY Thiosulfate-binding protein | 24 |                   | QALAILQLK                  | 71  | 10 | 0  | 2.04   |                                                                             | 1037.63 | 75.303  | 1553   | 2 | 519.32 | -4.35  |
| [P67093 UG_SALTY Universal stress protein G  | 1  |                   | HATLPVLVVR                 | 132 | 10 | 4  | 51.78  | y5y7y8y9                                                                    | 1104.68 | 61.277  | 81439  | 2 | 552.84 | -12.27 |

|                                            |    |                 |                                 |     |    |    |        |                                                                                               |         |         |        |   |         |        |
|--------------------------------------------|----|-----------------|---------------------------------|-----|----|----|--------|-----------------------------------------------------------------------------------------------|---------|---------|--------|---|---------|--------|
| P67093 UG_SALTY Universal stress protein G | 2  |                 | TIIMPVDVFEMELSDK                | 3   | 16 | 16 | 131.78 | b2°b2b3°b3b4y1y3y4y7y8y9y10y12y13y14y16                                                       | 1866.94 | 104.471 | 69241  | 2 | 933.97  | 8.50   |
| P67093 UG_SALTY Universal stress protein G | 3  |                 | LQTMVGHFSDPSR                   | 69  | 14 | 5  | 27.79  | b7b9°b9b11°b11                                                                                | 1587.80 | 67.865  | 2480   | 2 | 794.41  | 5.30   |
| P67093 UG_SALTY Universal stress protein G | 4  |                 | NPSITTHLLGSNASSVVR              | 114 | 18 | 5  | 24.45  | y5y11°y11y12°y12                                                                              | 1852.96 | 59.270  | 41624  | 3 | 618.32  | -17.26 |
| P67093 UG_SALTY Universal stress protein G | 5  |                 | FEEHLQHEAETR                    | 57  | 12 | 3  | 22.21  | b6b8y3                                                                                        | 1525.72 | 43.553  | 4117   | 3 | 509.25  | 11.60  |
| P67093 UG_SALTY Universal stress protein G | 6  |                 | FAADVRR                         | 50  | 6  | 1  | 13.6   | y4                                                                                            | 678.35  | 30.576  | 1928   | 2 | 339.68  | -2.97  |
| P67093 UG_SALTY Universal stress protein G | 7  |                 | TIIMPVDVFEMELSDKAIR             | 3   | 19 | 8  | 59.54  | b3y4y9y10°y10y11y15y16                                                                        | 2207.13 | 100.564 | 47979  | 3 | 736.38  | -6.64  |
| P67093 UG_SALTY Universal stress protein G | 8  |                 | MYKTIIMPVDVFEMELSDK             | 0   | 19 | 6  | 40.73  | b3b12y3y5y9y13                                                                                | 2289.09 | 98.764  | 6182   | 3 | 763.70  | -13.86 |
| P67093 UG_SALTY Universal stress protein G | 9  | Oxidation+M(24) | HAEFLLAQDQGVHLLHVLPGSASMSLHR    | 22  | 28 | 3  | 11.68  | b8b12y7                                                                                       | 3079.62 | 137.270 | 13523  | 3 | 1027.21 | 9.51   |
| P67093 UG_SALTY Universal stress protein G | 10 | Oxidation+M(4)  | TIIMPVDVFEMELSDK                | 3   | 16 | 3  | 25.47  | y6y9y10                                                                                       | 1882.94 | 60.146  | 3953   | 3 | 628.32  | 11.35  |
| P67093 UG_SALTY Universal stress protein G | 11 | Oxidation+M(4)  | LQTMVGHFSDPSR                   | 69  | 14 | 4  | 24.66  | b12y9y10°y10                                                                                  | 1603.80 | 71.811  | 2761   | 2 | 802.40  | 5.25   |
| P0A7W4 RS5_SALTY 30S ribosomal protein S5  | 1  |                 | VFMQPASEGTHIAGGAMR              | 93  | 19 | 31 | 236.15 | b2b3b4b7°b7b10°b10°b10b11b12°b12°b12b13°b13b14b17y4y5y6y7y11y12y13°y13y14y15°y15y16°y16y17y19 | 1892.95 | 68.563  | 112117 | 2 | 946.98  | 5.35   |
| P0A7W4 RS5_SALTY 30S ribosomal protein S5  | 2  |                 | AYGSTNPINVVRR                   | 126 | 12 | 19 | 153.35 | b2b3b4b5b6°b6b11y1y2y3y4°y4y5y6y7y8y10y12°y12                                                 | 1290.68 | 51.783  | 92714  | 2 | 645.84  | -2.46  |
| P0A7W4 RS5_SALTY 30S ribosomal protein S5  | 3  |                 | ATIDGLENMNSPEMVAAK              | 138 | 18 | 18 | 112.19 | b11b12°b12b15y1y2y3y7y8y9°y9°y9y10y11y12y14°y14°y14                                           | 1890.91 | 63.837  | 55982  | 2 | 945.96  | 6.71   |
| P0A7W4 RS5_SALTY 30S ribosomal protein S5  | 4  |                 | ATIDGLENMNSPEMVAAKR             | 138 | 19 | 15 | 102.44 | b2°b2b4b7y1y3y4y8y9y10°y10y11y12y13°y13                                                       | 2046.98 | 59.709  | 53668  | 3 | 683.00  | -8.95  |
| P0A7W4 RS5_SALTY 30S ribosomal protein S5  | 5  |                 | AREVPAAIQK                      | 52  | 10 | 5  | 39.23  | b4b6y4y6y10                                                                                   | 1082.62 | 29.251  | 5858   | 2 | 541.81  | -8.91  |
| P0A7W4 RS5_SALTY 30S ribosomal protein S5  | 6  |                 | SVEEILGK                        | 159 | 8  | 7  | 33.01  | b1b2b5y2y6y7y8                                                                                | 874.48  | 31.775  | 4189   | 2 | 437.74  | -8.72  |
| P0A7W4 RS5_SALTY 30S ribosomal protein S5  | 7  |                 | AVLEVAGVHNVLAK                  | 112 | 14 | 10 | 106.99 | b4b6b11b12y6y8y9y10y11y12                                                                     | 1419.80 | 60.983  | 112372 | 3 | 473.94  | -21.84 |
| P0A7W4 RS5_SALTY 30S ribosomal protein S5  | 8  |                 | IFSFTALTTVGDGNRR                | 29  | 16 | 11 | 79.47  | b5b7b13b14y3y6y10°y10y11°y11y14                                                               | 1653.83 | 70.901  | 6209   | 2 | 827.42  | -20.59 |
| P0A7W4 RS5_SALTY 30S ribosomal protein S5  | 9  |                 | QAGELQEK                        | 6   | 8  | 4  | 36.02  | b5b7y7°y7                                                                                     | 902.44  | 52.154  | 2844   | 2 | 451.73  | -15.56 |
| P0A7W4 RS5_SALTY 30S ribosomal protein S5  | 10 |                 | IFSFTALTTVGDGNRRVGFYGYK         | 29  | 23 | 3  | 22.04  | b4y4y5                                                                                        | 2362.23 | 73.301  | 344637 | 4 | 591.31  | 4.65   |
| P0A7W4 RS5_SALTY 30S ribosomal protein S5  | 11 |                 | MAHIEKQAGELQEK                  | 0   | 14 | 6  | 19.22  | b8°b8b12y6°y6°y6                                                                              | 1611.80 | 55.735  | 17517  | 2 | 806.40  | -12.87 |
| P0A7W4 RS5_SALTY 30S ribosomal protein S5  | 12 |                 | AYGSTNPINVVRRATIDGLENMNSPEMVAAK | 126 | 30 | 6  | 25.5   | b9°b9y6y7y11y14                                                                               | 3162.59 | 117.954 | 3093   | 3 | 1054.87 | 10.27  |
| P0A7W4 RS5_SALTY 30S ribosomal protein S5  | 13 |                 | GVHTGSRVFMQPASEGTHIAGGAMR       | 86  | 26 | 3  | 12.11  | b14b16y15                                                                                     | 2587.26 | 72.488  | 1847   | 3 | 863.09  | -8.49  |
| Q8ZM79 YQFB_SALTY UPF0267 protein yqfB     | 1  |                 | VIAEIYPNQTQFYVIDFK              | 83  | 18 | 6  | 26.5   | b2b8b9b13y12y18                                                                               | 2188.16 | 88.787  | 19549  | 2 | 1094.58 | 11.05  |
| Q8ZM79 YQFB_SALTY UPF0267 protein yqfB     | 2  |                 | MQPNDITFFQR                     | 0   | 11 | 16 | 84.77  | b2°b2b9b10°b10b11y5°y5y7°y7y8y9°y9y10y11°y11                                                  | 1396.67 | 69.585  | 12003  | 2 | 698.84  | 1.31   |

|                                         |    |                      |                                |     |    |    |        |                                                                 |         |         |        |   |         |        |
|-----------------------------------------|----|----------------------|--------------------------------|-----|----|----|--------|-----------------------------------------------------------------|---------|---------|--------|---|---------|--------|
| [Q8ZM79]YQFB_SALTY UPF0267 protein yqfB | 3  |                      | QPN DITFFQR                    | 1   | 10 | 6  | 26.83  | b6*b6b8y5°y5*y5                                                 | 1265.63 | 24.026  | 35043  | 3 | 422.55  | -0.58  |
| [Q8ZM79]YQFB_SALTY UPF0267 protein yqfB | 4  |                      | HAQQENMSLDELKR                 | 69  | 14 | 4  | 24.66  | b4*b4b5y11                                                      | 1698.81 | 63.845  | 2251   | 2 | 849.91  | -5.60  |
| [P65702]PGK_SALTY Phohoglycerate kinase | 1  |                      | SVNDVKEDEQILDIGDASAQQLAE ILK   | 272 | 27 | 21 | 105.7  | b2°b2b4°b4b5b11*b11b13*b13b14b25b26y1y2y3y4y5y7y8y10y27         | 2941.51 | 100.133 | 198923 | 3 | 981.17  | 2.41   |
| [P65702]PGK_SALTY Phohoglycerate kinase | 2  |                      | VLPAVAMLEER                    | 373 | 11 | 12 | 94.77  | b2y1y2y3y4°y4y5y6y7y8y9y11                                      | 1227.67 | 80.313  | 152734 | 2 | 614.34  | -5.97  |
| [P65702]PGK_SALTY Phohoglycerate kinase | 3  | Carbamidomethyl+C(6) | FADVACAGPLLAELDALGK            | 156 | 20 | 21 | 170.79 | b2b3b4b5b7b12b13y2y3y4y5°y5y6y8y9y13y14y15y16°y16y20            | 2002.05 | 99.008  | 134425 | 2 | 1001.53 | 6.95   |
| [P65702]PGK_SALTY Phohoglycerate kinase | 4  |                      | VATEFSETAPATLK                 | 258 | 14 | 19 | 144.16 | b1b2b3°b3b5b6b7y1y2y3y5y6y7y9°y9y10y11y12y14                    | 1464.76 | 53.270  | 93420  | 2 | 732.88  | -0.33  |
| [P65702]PGK_SALTY Phohoglycerate kinase | 5  | Carbamidomethyl+C(5) | LLTTC DIPVPTDVR                | 244 | 14 | 15 | 106.99 | b2b5b6°b6b7°b7b9y2y5y7y8y10y11y12y14                            | 1599.84 | 69.132  | 87822  | 2 | 800.43  | 1.30   |
| [P65702]PGK_SALTY Phohoglycerate kinase | 6  |                      | VMVTSHLGRPTEGEYNEEFSLLPV VNYLK | 53  | 29 | 9  | 30.39  | b1b2b13b17b18y4y7y17y29                                         | 3321.66 | 92.201  | 84978  | 4 | 831.17  | -6.69  |
| [P65702]PGK_SALTY Phohoglycerate kinase | 7  |                      | TILWNGPVGVFEPNFR               | 302 | 17 | 18 | 102.8  | b2°b2b13°b13*b13y2y4*y4y5y6°y6y7*y7y11y12y13y14y17              | 1993.05 | 106.315 | 81561  | 2 | 997.03  | 9.49   |
| [P65702]PGK_SALTY Phohoglycerate kinase | 8  |                      | ADLNV PVKEGK                   | 19  | 11 | 11 | 70.79  | b1b5y1y2y3y5y6y7y8*y8y11                                        | 1169.65 | 37.519  | 55109  | 2 | 585.33  | -5.95  |
| [P65702]PGK_SALTY Phohoglycerate kinase | 9  |                      | ASLPTIELALK                    | 38  | 11 | 8  | 65.38  | y1y2y3y4y5y7y8y11                                               | 1155.69 | 77.513  | 50802  | 2 | 578.35  | -9.61  |
| [P65702]PGK_SALTY Phohoglycerate kinase | 10 |                      | IADQLIVGGGIANTFVAAQGH SVG K    | 206 | 25 | 7  | 16.24  | b1b3b5y2y5y9°y9                                                 | 2423.29 | 78.317  | 41781  | 3 | 808.43  | -7.46  |
| [P65702]PGK_SALTY Phohoglycerate kinase | 11 |                      | TILWNGPVGVFEPNFRK              | 302 | 18 | 5  | 22.69  | b2y5y10y12y18                                                   | 2121.12 | 96.716  | 38467  | 3 | 707.71  | -4.72  |
| [P65702]PGK_SALTY Phohoglycerate kinase | 12 |                      | MTDL DLAGKR                    | 5   | 10 | 10 | 86.58  | b2b6b9°b9y1y3y4y5y6y7                                           | 1119.58 | 43.359  | 36169  | 2 | 560.29  | -3.82  |
| [P65702]PGK_SALTY Phohoglycerate kinase | 13 |                      | SLYEADLVDEAK                   | 231 | 12 | 4  | 26.19  | b11y4y5y12                                                      | 1352.65 | 59.020  | 13415  | 2 | 676.83  | -3.25  |
| [P65702]PGK_SALTY Phohoglycerate kinase | 14 | Carbamidomethyl+C(5) | YAALCDVFVMDAFGTAHR             | 128 | 18 | 4  | 22.93  | b9b10°b10y13                                                    | 2043.92 | 90.389  | 4838   | 2 | 1022.46 | -11.05 |
| [P65702]PGK_SALTY Phohoglycerate kinase | 15 |                      | VTSDAR                         | 30  | 6  | 1  | 13.6   | y4                                                              | 648.32  | 65.253  | 11595  | 1 | 648.32  | -13.56 |
| [P65702]PGK_SALTY Phohoglycerate kinase | 16 |                      | AQASTHGIGK                     | 146 | 10 | 3  | 33.82  | y4y7y8                                                          | 969.50  | 16.572  | 5907   | 2 | 485.26  | -8.88  |
| [P65702]PGK_SALTY Phohoglycerate kinase | 17 |                      | DYLDGVDVAEGELVVLENVR           | 93  | 20 | 4  | 25.17  | b7y4y5y7                                                        | 2204.11 | 115.431 | 4425   | 3 | 735.37  | -1.11  |
| [P65702]PGK_SALTY Phohoglycerate kinase | 18 |                      | ISYISTGGGAFLEFVEGK             | 355 | 18 | 6  | 26.5   | b5°b5b7b8°b8y14                                                 | 1874.94 | 97.868  | 1826   | 2 | 937.97  | -8.72  |
| [P65702]PGK_SALTY Phohoglycerate kinase | 19 |                      | EDEQILDIGDASAQQLAEILK          | 278 | 21 | 4  | 21.62  | b4b7b9y13                                                       | 2299.13 | 82.005  | 1717   | 3 | 767.05  | -14.97 |
| [P65702]PGK_SALTY Phohoglycerate kinase | 20 |                      | TDL DLAGKR                     | 6   | 9  | 0  | 2.04   |                                                                 | 988.53  | 43.394  | 15663  | 2 | 494.77  | -7.84  |
| [P65702]PGK_SALTY Phohoglycerate kinase | 21 |                      | PAVAMLEER                      | 375 | 9  | 2  | 18.82  | b3b5                                                            | 1015.52 | 80.314  | 7948   | 2 | 508.26  | -6.79  |
| [P65702]PGK_SALTY Phohoglycerate kinase | 22 |                      | DLNV PVKEGK                    | 20  | 10 | 1  | 7.85   | b4                                                              | 1098.60 | 37.523  | 7025   | 2 | 549.81  | -10.78 |
| [P0AA28]THIO_SALTY Thioredoxin-1        | 1  |                      | LNIDQNPGTAPK                   | 58  | 12 | 25 | 179.09 | b2*b2b3b4*b4b6°b6b7°b7b9°b9b10y1y2y4y6y7y8*y8y9*y9y10*y10y11y12 | 1267.65 | 39.286  | 144672 | 2 | 634.33  | -11.07 |
| [P0AA28]THIO_SALTY Thioredoxin-1        | 2  |                      | MIAPILDEIADEYQGK               | 37  | 16 | 9  | 64.07  | b2y2y3y4y7y10y13y14y16                                          | 1805.91 | 93.645  | 103927 | 2 | 903.46  | 6.35   |

|                                                           |    |                    |                                      |     |    |    |        |                                                                         |         |         |        |   |         |        |
|-----------------------------------------------------------|----|--------------------|--------------------------------------|-----|----|----|--------|-------------------------------------------------------------------------|---------|---------|--------|---|---------|--------|
| P0AA28 THIO_SALTY Thioredoxin-1                           | 3  |                    | GIPTLLLLFK                           | 74  | 9  | 9  | 74.75  | b3y1y2y3y4y5y6y7y9                                                      | 1001.63 | 90.616  | 88761  | 2 | 501.32  | -10.91 |
| P0AA28 THIO_SALTY Thioredoxin-1                           | 4  |                    | MIAPILDEIADEYQGKLTVAK                | 37  | 21 | 12 | 113.33 | b3y5y7y11y12y13y14y15*<br>y15y16y18y19                                  | 2318.22 | 94.697  | 119517 | 3 | 773.41  | -5.37  |
| P0AA28 THIO_SALTY Thioredoxin-1                           | 5  |                    | MSDKIHLTDDSFDTDVLK                   | 0   | 19 | 5  | 14.89  | b11y9*y9y12*y12                                                         | 2193.06 | 104.406 | 1775   | 3 | 731.69  | -5.12  |
| P0AA28 THIO_SALTY Thioredoxin-1                           | 6  |                    | GIPTLLLLFK                           | 74  | 9  | 0  | 1.63   |                                                                         | 983.63  | 90.619  | 1903   | 2 | 492.32  | 2.05   |
| P23905 DGAL_SALTY D-galactose-binding periplasmic protein | 1  |                    | SSIPVFGVDALPEALALVK                  | 250 | 19 | 17 | 172.34 | b4b5b6b10y2y3y4y5y6y8y<br>10y11y13y14y15y16y19                          | 1926.11 | 107.740 | 90609  | 2 | 963.56  | 7.16   |
| P23905 DGAL_SALTY D-galactose-binding periplasmic protein | 2  |                    | ALAINLVDPAAGTVIEK                    | 84  | 18 | 12 | 66.38  | b3b5*b5b6y2*y2y6y7y10y<br>11y14y18                                      | 1766.01 | 80.648  | 76496  | 2 | 883.51  | 2.42   |
| P23905 DGAL_SALTY D-galactose-binding periplasmic protein | 3  |                    | SGAMAGTVLNDANNQAK                    | 269 | 17 | 23 | 132.16 | b2*b2b3b4b9*b9b13b17*b1<br>7y2y5y6y7y8y9*y9y10y11*<br>y11y12*y12*y12y17 | 1661.80 | 46.980  | 70023  | 2 | 831.40  | 2.57   |
| P23905 DGAL_SALTY D-galactose-binding periplasmic protein | 4  |                    | VPYVGVDKDNLEFTQK                     | 315 | 17 | 4  | 16.26  | b3y11y13y17                                                             | 1938.96 | 62.209  | 40547  | 3 | 646.99  | -9.88  |
| P23905 DGAL_SALTY D-galactose-binding periplasmic protein | 5  |                    | GQNPVVFFNKEPSR                       | 104 | 15 | 5  | 29.35  | b11y4y5y8*y8                                                            | 1717.89 | 67.916  | 18840  | 3 | 573.30  | -9.73  |
| P23905 DGAL_SALTY D-galactose-binding periplasmic protein | 6  |                    | YDDNFMSVVR                           | 34  | 10 | 3  | 33.82  | y5y6y9                                                                  | 1245.56 | 67.038  | 13235  | 2 | 623.29  | 5.29   |
| P23905 DGAL_SALTY D-galactose-binding periplasmic protein | 7  |                    | MDAWLSGPNANK                         | 214 | 12 | 4  | 22.21  | b11*b11y8y10                                                            | 1303.60 | 50.147  | 11875  | 2 | 652.31  | -5.24  |
| P23905 DGAL_SALTY D-galactose-binding periplasmic protein | 8  |                    | SAPDVQLLMNDSQNDQSK                   | 52  | 18 | 3  | 15.53  | b9b11y5                                                                 | 1989.95 | 62.813  | 1532   | 2 | 995.48  | 15.15  |
| P23905 DGAL_SALTY D-galactose-binding periplasmic protein | 9  |                    | SAPDVQLLMNDSQNDQSKQNDQI<br>DVLLAK    | 52  | 29 | 5  | 48.69  | b5y3y4y5y6                                                              | 3227.61 | 78.283  | 41758  | 3 | 1076.54 | 7.26   |
| P23905 DGAL_SALTY D-galactose-binding periplasmic protein | 10 |                    | GQNPVVFFNKEPSR                       | 104 | 15 | 3  | 18.08  | b4y4y8                                                                  | 1717.88 | 62.016  | 14685  | 3 | 573.30  | -11.80 |
| P23905 DGAL_SALTY D-galactose-binding periplasmic protein | 11 |                    | DGKSAPDVQLLMNDSQNDQSK                | 49  | 21 | 4  | 23.48  | b3b7*b7b8                                                               | 2290.07 | 77.830  | 12224  | 3 | 764.03  | 3.09   |
| P23905 DGAL_SALTY D-galactose-binding periplasmic protein | 12 |                    | AIEKD GK                             | 45  | 7  | 5  | 37.37  | b4b5*b5y4*y4                                                            | 760.43  | 72.079  | 7482   | 1 | 760.43  | 10.19  |
| P23905 DGAL_SALTY D-galactose-binding periplasmic protein | 13 |                    | SGAMAGTVLNDANNQAKATFDL<br>AK         | 269 | 24 | 3  | 12.67  | b9b12y3                                                                 | 2408.17 | 58.557  | 5182   | 2 | 1204.59 | -8.21  |
| P23905 DGAL_SALTY D-galactose-binding periplasmic protein | 14 |                    | MDAWLSGPNANKIEVVIANNDA<br>MAMGAVEALK | 214 | 32 | 4  | 22.1   | b12*b12y11y12                                                           | 3343.60 | 92.186  | 4332   | 5 | 669.53  | -14.31 |
| P23905 DGAL_SALTY D-galactose-binding periplasmic protein | 15 |                    | IGVTIYKYDDNFMSVVR                    | 27  | 17 | 5  | 16.26  | b5y8*y8*y8y11                                                           | 2020.05 | 57.247  | 3378   | 3 | 674.02  | 13.05  |
| P23905 DGAL_SALTY D-galactose-binding periplasmic protein | 16 | Phosphoryl STY(11) | AYYVGTDSESGVIQGDLIAK                 | 127 | 21 | 5  | 35.75  | b9b10y11*y11y12                                                         | 2294.07 | 68.350  | 1747   | 3 | 765.36  | -6.28  |

|                                                            |    |                      |                                            |     |    |    |        |                                                                                                                           |         |        |        |   |         |        |
|------------------------------------------------------------|----|----------------------|--------------------------------------------|-----|----|----|--------|---------------------------------------------------------------------------------------------------------------------------|---------|--------|--------|---|---------|--------|
| P23905 DGAL_SALTY D-galactose-binding periplasmic protein  | 17 | Oxidation+M()        | IEVVIANN DAMAMGAVEALK                      | 226 | 20 | 4  | 14.32  | b9y10°y10y15                                                                                                              | 2075.05 | 66.999 | 18437  | 3 | 692.35  | -2.82  |
| P23905 DGAL_SALTY D-galactose-binding periplasmic protein  | 18 | Oxidation+M(8)       | VLTL SAVMASLLFGAHAHAADTR                   | 4   | 23 | 3  | 23.09  | y6y7y9                                                                                                                    | 2368.23 | 78.689 | 14101  | 3 | 790.08  | -5.36  |
| P23905 DGAL_SALTY D-galactose-binding periplasmic protein  | 19 |                      | GQNV PVVFFNKEPSR                           | 104 | 15 | 0  | 4.07   |                                                                                                                           | 1699.91 | 67.866 | 7364   | 3 | 567.31  | 14.65  |
| P06202 OPPA_SALTY Periplasmic oligopeptide-binding protein | 1  |                      | LADPNTASPYASYLQYGHIANIDD<br>IIAGKKPATDLGVK | 125 | 38 | 38 | 205.61 | b2b3b5°b5*b5b6°b6*b6b7°<br>b7*b7b8°b8*b8b9°b9b10°<br>b10b11b13b26b34y1y3y4y<br>8y11y12y16y22y25y26y27<br>y28y30y31y38*y38 | 4001.02 | 83.123 | 265338 | 5 | 801.01  | -10.50 |
| P06202 OPPA_SALTY Periplasmic oligopeptide-binding protein | 2  |                      | AEQQLDKDSAIVPVYYYVNAR                      | 494 | 21 | 14 | 107.89 | b3b5b10°b10b11b12b13y3<br>y4y5y7y9y10y21                                                                                  | 2442.23 | 73.401 | 133949 | 3 | 814.75  | -1.80  |
| P06202 OPPA_SALTY Periplasmic oligopeptide-binding protein | 3  |                      | WSDGTPVTAHDFVYSWQR                         | 107 | 18 | 17 | 134.58 | b2b3b7°b7y3y4y5y6y7y8y9°<br>y9y11y12y13y18*y18                                                                            | 2151.97 | 72.655 | 129606 | 3 | 718.00  | -6.58  |
| P06202 OPPA_SALTY Periplasmic oligopeptide-binding protein | 4  | Carbamidomethyl+C(4) | AGWCADYNEPTSLNTMLSDSSN<br>NTAHYK           | 439 | 29 | 8  | 41.26  | y2y4y11y15y20y23y24y29                                                                                                    | 3294.43 | 90.167 | 121709 | 3 | 1098.82 | 6.52   |
| P06202 OPPA_SALTY Periplasmic oligopeptide-binding protein | 5  |                      | LVEPEWFK                                   | 352 | 8  | 10 | 67.17  | y2y3y4°y4y5°y5y6°y6y7y8                                                                                                   | 1047.54 | 71.484 | 112722 | 2 | 524.27  | -10.84 |
| P06202 OPPA_SALTY Periplasmic oligopeptide-binding protein | 6  |                      | ALDDHTFEVTLSEPVYFYK                        | 163 | 20 | 10 | 52.67  | b6b7b8b10°b10y5y7y9°y9y20                                                                                                 | 2371.15 | 86.057 | 97197  | 3 | 791.06  | 0.72   |
| P06202 OPPA_SALTY Periplasmic oligopeptide-binding protein | 7  |                      | SGEIDMTYNNMPIELFQK                         | 263 | 18 | 11 | 52.4   | b2b3b13y2y3y5y7y11y12*<br>y12y18                                                                                          | 2130.00 | 86.675 | 85069  | 2 | 1065.51 | 6.76   |
| P06202 OPPA_SALTY Periplasmic oligopeptide-binding protein | 8  |                      | TVINQVTYLPISSEVTDVNR                       | 241 | 20 | 21 | 130.14 | b8°b8*b8b9b10b12y2*y2y3y4y5y6y8°y8*y8y11y12y14°<br>y14y15y20                                                              | 2248.20 | 77.395 | 78912  | 2 | 1124.61 | 9.45   |
| P06202 OPPA_SALTY Periplasmic oligopeptide-binding protein | 9  |                      | NQGDLPAYSYTPPYTDGAK                        | 333 | 19 | 7  | 46.75  | b10b11y3y11y13y14y19                                                                                                      | 2057.96 | 59.933 | 76453  | 2 | 1029.48 | 7.83   |
| P06202 OPPA_SALTY Periplasmic oligopeptide-binding protein | 10 |                      | NLGVN NVLENQEWK                            | 410 | 14 | 7  | 38.91  | b2b3b10y8y11y12y14                                                                                                        | 1656.84 | 67.294 | 54914  | 2 | 828.93  | 5.30   |
| P06202 OPPA_SALTY Periplasmic oligopeptide-binding protein | 11 |                      | NPQYWDNAK                                  | 232 | 9  | 9  | 57.4   | b2y1y3*y3y4y6y8*y8y9                                                                                                      | 1135.51 | 40.322 | 34678  | 2 | 568.26  | -3.98  |
| P06202 OPPA_SALTY Periplasmic oligopeptide-binding protein | 12 |                      | NWVVNER                                    | 220 | 7  | 10 | 37.37  | b1b4*b4b7y3*y3y4°y4y7*<br>y7                                                                                              | 916.46  | 44.284 | 31994  | 2 | 458.73  | -7.93  |
| P06202 OPPA_SALTY Periplasmic oligopeptide-binding protein | 13 |                      | HQGTFDVAR                                  | 430 | 9  | 6  | 45.36  | b6y1y3y4y8y9                                                                                                              | 1030.50 | 32.952 | 26913  | 2 | 515.75  | -4.15  |
| P06202 OPPA_SALTY Periplasmic oligopeptide-binding protein | 14 |                      | LADPNTASPYASYLQYGHIANIDD<br>IIAGK          | 125 | 29 | 8  | 25.91  | b2b13°b13y3y4y10y22y29                                                                                                    | 3091.56 | 88.347 | 25305  | 3 | 1031.19 | 6.95   |
| P06202 OPPA_SALTY Periplasmic oligopeptide-binding protein | 15 |                      | VWTFHLRENAK                                | 96  | 11 | 4  | 36.63  | b4b5b9y3                                                                                                                  | 1400.75 | 61.957 | 5699   | 2 | 700.88  | 2.79   |



|                                                            |    |                       |                               |     |    |    |        |                                                                    |         |         |        |   |         |        |
|------------------------------------------------------------|----|-----------------------|-------------------------------|-----|----|----|--------|--------------------------------------------------------------------|---------|---------|--------|---|---------|--------|
| P06202 OPPA_SALTY Periplasmic oligopeptide-binding protein | 16 |                       | LLAEAGFTADKPLTFDLLYNTSDLHK    | 372 | 26 | 3  | 22.78  | b5b9b10                                                            | 2893.50 | 88.304  | 3044   | 3 | 965.17  | -0.17  |
| P06202 OPPA_SALTY Periplasmic oligopeptide-binding protein | 17 |                       | NEEAK                         | 366 | 5  | 1  | 13.19  | b4                                                                 | 590.28  | 64.346  | 2524   | 1 | 590.28  | 10.86  |
| P06202 OPPA_SALTY Periplasmic oligopeptide-binding protein | 18 |                       | TVINQVTYLPISSEVTDVNRYS        | 241 | 22 | 11 | 84.75  | b3y5y13°y13*y13y14y16y17y18y19y20                                  | 2567.34 | 77.239  | 116211 | 3 | 856.45  | -2.76  |
| P06202 OPPA_SALTY Periplasmic oligopeptide-binding protein | 19 |                       | IVLERNPQYWDNAK                | 227 | 14 | 3  | 19.22  | b11y4y12                                                           | 1745.88 | 54.129  | 54892  | 3 | 582.63  | -11.82 |
| P06202 OPPA_SALTY Periplasmic oligopeptide-binding protein | 20 |                       | FGDKWTQPANIVTNGAYK            | 200 | 18 | 3  | 24.45  | y6y7y11                                                            | 2009.99 | 63.611  | 41751  | 3 | 670.67  | -7.41  |
| P06202 OPPA_SALTY Periplasmic oligopeptide-binding protein | 21 | Carbamidomethyl+C(13) | EIPNEVRVDPYLCITYYYEINNQK      | 284 | 23 | 8  | 66.69  | y4y6y7y8°y8y9y11y21                                                | 2920.38 | 76.449  | 29974  | 3 | 974.13  | 0.75   |
| P06202 OPPA_SALTY Periplasmic oligopeptide-binding protein | 22 |                       | NQGDLPAYSYTPPYTDGAKLVPEEWFK   | 333 | 27 | 4  | 17.72  | b5y5y7y22                                                          | 3086.49 | 84.700  | 18544  | 3 | 1029.50 | 4.83   |
| P06202 OPPA_SALTY Periplasmic oligopeptide-binding protein | 23 |                       | VKNQGDLPAYSYTPPYTDGAK         | 331 | 21 | 6  | 38.49  | b6*b6y3y8y9y10                                                     | 2285.11 | 55.758  | 18182  | 3 | 762.37  | -1.07  |
| P06202 OPPA_SALTY Periplasmic oligopeptide-binding protein | 24 |                       | LKNWVVNER                     | 218 | 9  | 3  | 38.19  | y4y5y7                                                             | 1157.63 | 45.406  | 17312  | 2 | 579.32  | -14.02 |
| P06202 OPPA_SALTY Periplasmic oligopeptide-binding protein | 25 |                       | NPQYWDNAKTVINQVTYLPISSEVTDVNR | 232 | 29 | 6  | 25.91  | b12y7*y7y11y12y15                                                  | 3364.69 | 101.756 | 16427  | 3 | 1122.23 | 1.81   |
| P06202 OPPA_SALTY Periplasmic oligopeptide-binding protein | 26 |                       | SELYAKAEQQLDK                 | 488 | 13 | 4  | 20.57  | b8y6y10*y10                                                        | 1522.76 | 68.864  | 4739   | 2 | 761.88  | -10.66 |
| P06202 OPPA_SALTY Periplasmic oligopeptide-binding protein | 27 |                       | KNLGVNVNLENQEWK               | 409 | 15 | 4  | 41.39  | y4y6y8y13                                                          | 1784.92 | 80.338  | 3082   | 3 | 595.65  | -4.58  |
| P06202 OPPA_SALTY Periplasmic oligopeptide-binding protein | 28 |                       | DSAIVPVYYYVNARLVKPWVGGYTGK    | 501 | 26 | 4  | 15.73  | b8b13y5y8                                                          | 2915.52 | 84.502  | 1944   | 4 | 729.63  | -9.88  |
| P06202 OPPA_SALTY Periplasmic oligopeptide-binding protein | 29 |                       | TFLDTRHQGTDFVAR               | 424 | 15 | 4  | 18.08  | b5y4y7°y7                                                          | 1763.89 | 111.701 | 1739   | 2 | 882.45  | 2.91   |
| P52616 FLJB_SALTY Phase 2 flagellin                        | 1  |                       | AQILQQAGTSVLAQANQVPQNVLSLLR   | 479 | 27 | 26 | 182.68 | b2*b2b3b4b5*b5b6b7*b7b11°b11b12b13b17b18y1y2y3y4y5y6y9y10y12y13y27 | 2860.61 | 105.253 | 87276  | 3 | 954.21  | 2.90   |
| P52616 FLJB_SALTY Phase 2 flagellin                        | 2  |                       | NANDGISIAQTTEGALNEINNLR       | 66  | 25 | 8  | 12.37  | b6°b6*b6b14°b14*b14y14y25                                          | 2670.34 | 86.747  | 45033  | 2 | 1335.67 | 11.25  |
| P52616 FLJB_SALTY Phase 2 flagellin                        | 3  |                       | AQVINTNSLSLLTQNNLNK           | 1   | 19 | 8  | 22.67  | b2*b2b7°b7b8y1y15y19                                               | 2085.14 | 75.112  | 44705  | 2 | 1043.08 | 6.44   |
| P52616 FLJB_SALTY Phase 2 flagellin                        | 4  |                       | SQSALGTAIER                   | 20  | 11 | 9  | 36.63  | b2*b2b10y1y6°y6y7y9y11                                             | 1132.59 | 42.781  | 41795  | 2 | 566.80  | -6.79  |
| P52616 FLJB_SALTY Phase 2 flagellin                        | 5  |                       | AYANNGTTLDVSGLDAAIK           | 189 | 20 | 10 | 62.79  | b3b6b10b11b12°b12b15y2y6y14                                        | 2009.00 | 78.617  | 19669  | 3 | 670.34  | 7.96   |
| P52616 FLJB_SALTY Phase 2 flagellin                        | 6  |                       | ELAVQSANSTNSQSDLDLSIAEITQR    | 93  | 26 | 10 | 21.85  | b2b6°b6*b6b13°b13y6y10y12y26                                       | 2805.36 | 70.929  | 16642  | 3 | 935.79  | 2.87   |
| P52616 FLJB_SALTY Phase 2 flagellin                        | 7  |                       | YFVTIGGFTGADAAK               | 234 | 15 | 4  | 29.35  | b7b8b11y6                                                          | 1517.76 | 73.847  | 40422  | 2 | 759.38  | -2.09  |

|                                           |    |  |                                            |     |    |    |        |                                                           |         |         |        |   |         |        |
|-------------------------------------------|----|--|--------------------------------------------|-----|----|----|--------|-----------------------------------------------------------|---------|---------|--------|---|---------|--------|
| P52616 FLJB_SALTY Phase 2 flagellin       | 8  |  | AQPELAEAAAK                                | 403 | 11 | 3  | 24.23  | b3b8y10                                                   | 1098.56 | 87.872  | 4039   | 2 | 549.79  | -13.56 |
| P52616 FLJB_SALTY Phase 2 flagellin       | 9  |  | NALIAGGVDATDANGAELVK                       | 299 | 20 | 7  | 27.9   | b3b14°b14b16y15°y15y18                                    | 1898.99 | 93.871  | 2616   | 3 | 633.67  | 3.34   |
| P52616 FLJB_SALTY Phase 2 flagellin       | 10 |  | QINSQTLGLDSLNVQK                           | 161 | 16 | 5  | 17.1   | b4°b4*b4b12y8                                             | 1757.93 | 30.253  | 1562   | 3 | 586.65  | -4.44  |
| P52616 FLJB_SALTY Phase 2 flagellin       | 11 |  | AYANNGTTLDVSGLDDAAIKAAT<br>GGTNGTASVTGGAVK | 189 | 38 | 3  | 10.86  | b3y13y18                                                  | 3509.78 | 107.572 | 23528  | 4 | 878.20  | 11.55  |
| P52616 FLJB_SALTY Phase 2 flagellin       | 12 |  | TIEGGYALKAGDK                              | 328 | 13 | 5  | 32.21  | b4b5°b5b7y7                                               | 1322.69 | 38.245  | 19403  | 3 | 441.57  | -6.74  |
| P52616 FLJB_SALTY Phase 2 flagellin       | 13 |  | TEVVTIDGKTYNASK                            | 381 | 15 | 10 | 36.97  | b6b10°b10y5°y5°y5y8y11°<br>y11°y11                        | 1625.83 | 70.955  | 11168  | 2 | 813.42  | -4.05  |
| P52616 FLJB_SALTY Phase 2 flagellin       | 14 |  | AATGGTNGTASVTGGAVKFDAD<br>NNK              | 209 | 25 | 3  | 35.16  | y11y12y13                                                 | 2324.13 | 97.229  | 9922   | 2 | 1162.57 | 7.04   |
| P52616 FLJB_SALTY Phase 2 flagellin       | 15 |  | QINSQTLGLDSLNVQKAYDVK                      | 161 | 21 | 5  | 29.94  | b6*b6b12b13b15                                            | 2334.22 | 89.799  | 6125   | 3 | 778.74  | -4.29  |
| P52616 FLJB_SALTY Phase 2 flagellin       | 16 |  | SDLGAVQNRNSAITNLGNTVNN<br>LSEAR            | 434 | 28 | 8  | 53.63  | b3b4°b4y3y10y11y12y14                                     | 2975.47 | 93.728  | 5795   | 3 | 992.49  | -7.88  |
| P52616 FLJB_SALTY Phase 2 flagellin       | 17 |  | LNEIDRVSGQTQFNGVK                          | 119 | 17 | 3  | 16.26  | b3b11y4                                                   | 1905.01 | 60.124  | 4323   | 3 | 635.67  | 13.78  |
| P52616 FLJB_SALTY Phase 2 flagellin       | 18 |  | TYNASKAAGHDFK                              | 390 | 13 | 3  | 20.57  | b8b12y3                                                   | 1409.67 | 60.891  | 3903   | 2 | 705.34  | -6.32  |
| P52616 FLJB_SALTY Phase 2 flagellin       | 19 |  | TTMPAGATTKTEVQELK                          | 271 | 17 | 4  | 22.84  | b3b7y3y9                                                  | 1805.93 | 43.647  | 3371   | 3 | 602.65  | -0.81  |
| P52616 FLJB_SALTY Phase 2 flagellin       | 20 |  | TTSYTAADGTTKTAANQLGGVD<br>GK               | 357 | 24 | 4  | 16.8   | b3b12y5y13                                                | 2328.17 | 61.901  | 2458   | 2 | 1164.59 | 14.89  |
| P52616 FLJB_SALTY Phase 2 flagellin       | 21 |  | AYDVKDTAVTTK                               | 177 | 12 | 5  | 37.16  | b7b9b11°b11y7                                             | 1311.68 | 67.875  | 2346   | 2 | 656.34  | -0.09  |
| P52616 FLJB_SALTY Phase 2 flagellin       | 22 |  | AQPELAEAAAKTTENPLQK                        | 403 | 19 | 6  | 20.62  | b10°b10b14y7y13°y13                                       | 2010.06 | 108.449 | 1674   | 3 | 670.69  | 4.13   |
| P52616 FLJB_SALTY Phase 2 flagellin       | 23 |  | VRELAVQSANSTNSQSDLSIQAE<br>ITQR            | 91  | 28 | 4  | 17.69  | b5b11°b11b14                                              | 3060.52 | 114.476 | 1559   | 4 | 765.89  | 0.00   |
| P0A1Z2 SKP_SALTY Chaperone protein<br>skp | 1  |  | TGVSNTLENEFK                               | 39  | 12 | 20 | 137.15 | b2b3b6°b6b8°b8b9°b9y2y<br>3y4°y4°y4y5y6y7y8°y8y10<br>y12  | 1338.66 | 58.485  | 141170 | 2 | 669.83  | 1.09   |
| P0A1Z2 SKP_SALTY Chaperone protein<br>skp | 2  |  | IAIVNMGNLFQQVAQK                           | 23  | 16 | 19 | 126.52 | b1b2b3b4b8b12b15y1y2°y<br>2y3y4y6°y6y7y11y12y13y<br>16    | 1773.97 | 89.882  | 127829 | 2 | 887.49  | 1.31   |
| P0A1Z2 SKP_SALTY Chaperone protein<br>skp | 3  |  | VANDQSIDLVDANTVAYNSSDV<br>KIDITADV LK      | 126 | 32 | 17 | 71.76  | b2b6b9°b9b10°b10b11b12<br>°b12°b12b15b18y1y2y24y<br>25y32 | 3392.72 | 89.893  | 73222  | 3 | 1131.58 | 4.61   |
| P0A1Z2 SKP_SALTY Chaperone protein<br>skp | 4  |  | AQAFEKDR                                   | 97  | 8  | 7  | 33.01  | b2°b2b3y2y5y6y8                                           | 964.48  | 18.587  | 35410  | 2 | 482.74  | -7.85  |
| P0A1Z2 SKP_SALTY Chaperone protein<br>skp | 5  |  | KVANDQSIDLVDANTVAYNSSD<br>VK               | 125 | 25 | 4  | 12.37  | b5b14°b14y15                                              | 2665.33 | 92.525  | 13087  | 2 | 1333.17 | -1.92  |
| P0A1Z2 SKP_SALTY Chaperone protein<br>skp | 6  |  | IAIVNMGNLFQQVAQKTGVSNTL<br>ENEFK           | 23  | 28 | 5  | 20.44  | b8b11y5y8y12                                              | 3093.58 | 102.846 | 11402  | 4 | 774.15  | -8.60  |
| P0A1Z2 SKP_SALTY Chaperone protein<br>skp | 7  |  | MQRLQSMK                                   | 67  | 8  | 3  | 33.01  | b6y4y5                                                    | 1021.52 | 65.170  | 6685   | 2 | 511.27  | -3.29  |
| P0A1Z2 SKP_SALTY Chaperone protein<br>skp | 8  |  | AAELQKMETDLQSK                             | 53  | 14 | 3  | 27.79  | b4b6b11                                                   | 1591.78 | 66.134  | 3185   | 3 | 531.27  | -9.51  |
| O33921 AGP_SALTY Glucose-1-<br>phohatase  | 1  |  | TPIGGQLVFQR                                | 335 | 11 | 13 | 70.79  | b1°b1b2°b2b6°b6°b6y3y4y<br>8y9y10y11                      | 1215.68 | 62.065  | 123689 | 2 | 608.34  | -7.33  |
| O33921 AGP_SALTY Glucose-1-<br>phohatase  | 2  |  | MGTMDPTEFNPVITDDSAAFR                      | 141 | 20 | 18 | 137.85 | b2b5y2y3y5y6y7y8y9°y9y1<br>1y12y13°y13y14y15°y15y<br>20   | 2186.01 | 78.715  | 98733  | 2 | 1093.51 | 7.71   |
| O33921 AGP_SALTY Glucose-1-<br>phohatase  | 3  |  | IEYVYQSAR                                  | 358 | 9  | 12 | 90.95  | b2b3b6b7b9y1y5y6y7°y7y<br>8y9                             | 1128.56 | 43.415  | 62058  | 2 | 564.79  | -3.35  |

|                                      |    |                                                |                                         |     |    |    |        |                                                          |         |         |        |   |         |        |
|--------------------------------------|----|------------------------------------------------|-----------------------------------------|-----|----|----|--------|----------------------------------------------------------|---------|---------|--------|---|---------|--------|
| O33921 AGP_SALTY Glucose-1-phohatase | 4  |                                                | QQAVQAMEK                               | 161 | 9  | 9  | 67.58  | b2*b2y3y4y5y6y7y9*y9                                     | 1032.51 | 27.013  | 57239  | 2 | 516.76  | -8.16  |
| O33921 AGP_SALTY Glucose-1-phohatase | 5  | Carbamidomethyl+C(14)                          | EWLV AQGLIPSGECPAPDTVYAY<br>ANSLQR      | 87  | 29 | 22 | 155.08 | b4b7°b7b8b9b16y2*y2y3y4y5y6y7*y7y9y10y11*y11y12y13y20y29 | 3205.58 | 93.910  | 42614  | 3 | 1069.20 | 4.11   |
| O33921 AGP_SALTY Glucose-1-phohatase | 6  |                                                | NGYQDSLFTSPTVAR                         | 266 | 15 | 7  | 43.79  | b14y1y3y9y10y11y15                                       | 1655.80 | 63.689  | 37623  | 2 | 828.41  | 0.29   |
| O33921 AGP_SALTY Glucose-1-phohatase | 7  |                                                | VGNSLVDAFTLQYYEGFPMQVA<br>WGGIHTDR      | 226 | 31 | 5  | 13.8   | b8b10*b10y5y16                                           | 3486.68 | 104.508 | 35955  | 3 | 1162.90 | 10.43  |
| O33921 AGP_SALTY Glucose-1-phohatase | 8  |                                                | APLANNGSVLAQSTPNAWPAWD<br>VPGGQLTTK     | 43  | 31 | 18 | 60.93  | b2b3b7b9°b9b14*b14b17b18y2y3y8*y8y10y13°y13y14y31        | 3161.62 | 83.717  | 30409  | 3 | 1054.55 | 6.41   |
| O33921 AGP_SALTY Glucose-1-phohatase | 9  |                                                | DTFSANYQQEPGVQGPLK                      | 208 | 18 | 15 | 64.62  | b2b3°b3b10b12*b12y1y8y11y12y13°y13*y13y15y18             | 1978.97 | 57.319  | 29258  | 2 | 989.99  | 7.96   |
| O33921 AGP_SALTY Glucose-1-phohatase | 10 | Carbamidomethyl+C(16)                          | TVATAQFFITGAFPGCDIPVHHQE<br>K           | 116 | 25 | 3  | 12.37  | b13y7y12                                                 | 2771.32 | 79.210  | 27141  | 4 | 693.59  | -13.92 |
| O33921 AGP_SALTY Glucose-1-phohatase | 11 | Carbamidomethyl+C(14)                          | LLEQITHYQDSPSCKEK                       | 182 | 17 | 5  | 29.83  | b10b11y7y10y17                                           | 2075.99 | 48.592  | 14905  | 3 | 692.67  | -6.70  |
| O33921 AGP_SALTY Glucose-1-phohatase | 12 | Carbamidomethyl+C(3)                           | HQCSLIDAK                               | 199 | 9  | 6  | 30.41  | b2*b2b5y2y4y7                                            | 1071.52 | 32.930  | 9836   | 2 | 536.26  | -2.73  |
| O33921 AGP_SALTY Glucose-1-phohatase | 13 |                                                | VTVLVGHDNSNIASLLTALDFKPYQ<br>LHDQYER    | 304 | 31 | 16 | 91.74  | b4b10*b10b12°b12b14y4°y4*y4y5y6y7y10y15y16y17            | 3542.77 | 96.021  | 196078 | 5 | 709.36  | -17.02 |
| O33921 AGP_SALTY Glucose-1-phohatase | 14 |                                                | SQLHLDSEYK                              | 172 | 10 | 4  | 26.83  | b8y3y6°y6                                                | 1219.59 | 41.102  | 14596  | 2 | 610.30  | -1.50  |
| O33921 AGP_SALTY Glucose-1-phohatase | 15 |                                                | GGVLEVYMGHYTR                           | 74  | 13 | 4  | 34.34  | b11b12y8y10                                              | 1481.69 | 57.263  | 2060   | 2 | 741.35  | -19.94 |
| O33921 AGP_SALTY Glucose-1-phohatase | 16 |                                                | LKNGYQDSLFTSPTVAR                       | 264 | 17 | 12 | 122.65 | b9*b9b10b11b12y4y5y6y7y8y12y15                           | 1896.96 | 59.423  | 83484  | 3 | 632.99  | -13.06 |
| O33921 AGP_SALTY Glucose-1-phohatase | 17 | Carbamidomethyl+C(2);<br>Carbamidomethyl+C(10) | GCPVDANGFCPLDKFDNMNTA<br>AK             | 389 | 24 | 9  | 39.31  | b4y3y10y14°y14*y14y20y22°y22                             | 2641.19 | 78.688  | 73112  | 3 | 881.07  | 1.39   |
| O33921 AGP_SALTY Glucose-1-phohatase | 18 |                                                | HNLRAPLANNGSVLAQSTPNAWP<br>AWDVPGGQLTTK | 39  | 35 | 3  | 22.99  | b12b13b22                                                | 3681.86 | 78.255  | 68859  | 4 | 921.22  | -7.36  |
| O33921 AGP_SALTY Glucose-1-phohatase | 19 |                                                | MGTMDPTFNPNVITDDSAAFRQQA<br>VQAMEK      | 141 | 29 | 10 | 58.96  | b3b5b13y3y4y5°y5y21y24y25                                | 3199.51 | 81.952  | 42296  | 3 | 1067.17 | 7.48   |
| O33921 AGP_SALTY Glucose-1-phohatase | 20 |                                                | NAEALTLSKSPAQR                          | 370 | 13 | 4  | 49.03  | y4y5y6y7                                                 | 1398.77 | 42.082  | 38810  | 2 | 699.89  | -2.79  |
| O33921 AGP_SALTY Glucose-1-phohatase | 21 |                                                | QQAVQAMEKAR                             | 161 | 11 | 4  | 24.23  | b7b10°b10y8                                              | 1259.66 | 64.397  | 15577  | 2 | 630.33  | 6.11   |
| O33921 AGP_SALTY Glucose-1-phohatase | 22 | Oxidation+M(8)                                 | GGVLEVYMGHYTR                           | 74  | 13 | 4  | 20.57  | b5°b5b12y12                                              | 1497.71 | 96.965  | 1722   | 2 | 749.36  | -3.67  |
| O33921 AGP_SALTY Glucose-1-phohatase | 23 |                                                | QQAVQAMEK                               | 161 | 9  | 0  | 1.63   |                                                          | 1015.48 | 27.004  | 1713   | 2 | 508.24  | -4.69  |
| P00924 ENO1_YEAST Enolase 1          | 1  |                                                | NVNDVIAPAFVK                            | 67  | 12 | 17 | 126.97 | b2*b2b3*b3b4b6b7y2y3y5y6y7y8y10*y10y12*y12               | 1286.71 | 66.650  | 97116  | 2 | 643.86  | -3.23  |
| P00924 ENO1_YEAST Enolase 1          | 2  |                                                | VNQIGTLESSEIK                           | 346 | 12 | 7  | 49.56  | b2b8y5y8y9y10y12                                         | 1288.71 | 55.091  | 95583  | 2 | 644.86  | -3.88  |
| P00924 ENO1_YEAST Enolase 1          | 3  |                                                | SIVPSGASTGVHEALEMR                      | 32  | 18 | 16 | 125.37 | b2b9°b9b12b13y2y3y5y6y9y10y11°y11y14y15y16               | 1840.90 | 61.998  | 71620  | 3 | 614.31  | -9.68  |
| P00924 ENO1_YEAST Enolase 1          | 4  |                                                | TAGIQIVADDLTVTNPK                       | 312 | 17 | 10 | 66.39  | b3b14b15y6y8y10*y10y11y13y17                             | 1755.95 | 72.882  | 57129  | 2 | 878.48  | 3.06   |
| P00924 ENO1_YEAST Enolase 1          | 5  |                                                | IEEELGDNAVFAGENFHHGDK                   | 415 | 21 | 7  | 36.11  | b7b8b10b12*b12y8y13                                      | 2328.04 | 81.342  | 6710   | 4 | 582.77  | -3.88  |
| P00924 ENO1_YEAST Enolase 1          | 6  |                                                | IGSEVYHNLK                              | 185 | 10 | 5  | 40.99  | b5°b5b6y3y7                                              | 1159.59 | 55.564  | 2659   | 2 | 580.30  | -14.21 |
| P00924 ENO1_YEAST Enolase 1          | 7  |                                                | AADALLLK                                | 338 | 8  | 7  | 93.55  | b3b6y3y4y5y6y7                                           | 814.49  | 54.378  | 71318  | 2 | 407.75  | -16.11 |

|                                                        |    |                    |                                      |     |    |    |        |                                               |         |         |        |   |         |        |
|--------------------------------------------------------|----|--------------------|--------------------------------------|-----|----|----|--------|-----------------------------------------------|---------|---------|--------|---|---------|--------|
| P00924 ENO1_YEAST Enolase 1                            | 8  |                    | IATAIEK                              | 330 | 7  | 5  | 53.57  | y3y4y5y6°y6                                   | 745.43  | 29.004  | 27993  | 2 | 373.22  | -20.88 |
| P00924 ENO1_YEAST Enolase 1                            | 9  |                    | NVPLYK                               | 126 | 6  | 3  | 26.79  | b3*b3y4                                       | 733.42  | 37.600  | 19038  | 1 | 733.42  | -8.57  |
| P00924 ENO1_YEAST Enolase 1                            | 10 |                    | YGASAGNVGDEGGVAPNIQTAEELDLDLIVDAIK   | 201 | 33 | 4  | 11.04  | b7b16°b16y3                                   | 3257.68 | 101.619 | 9947   | 3 | 1086.56 | 17.76  |
| P00924 ENO1_YEAST Enolase 1                            | 11 |                    | YDLDFK                               | 258 | 6  | 5  | 56.18  | b4b5y3y5°y5                                   | 800.39  | 99.847  | 9036   | 1 | 800.39  | 6.48   |
| P00924 ENO1_YEAST Enolase 1                            | 12 |                    | HLADLSK                              | 132 | 7  | 3  | 37.37  | b4y3y4                                        | 783.43  | 30.340  | 3619   | 1 | 783.43  | -13.17 |
| P00924 ENO1_YEAST Enolase 1                            | 13 |                    | SGETEDTFIADLVVGLR                    | 375 | 17 | 3  | 16.26  | b8b14y14                                      | 1821.90 | 87.581  | 3408   | 2 | 911.46  | -10.92 |
| P00924 ENO1_YEAST Enolase 1                            | 14 |                    | WLTGPQLADLYHSLMK                     | 272 | 16 | 3  | 25.47  | b3b8b9                                        | 1872.99 | 91.637  | 3389   | 2 | 937.00  | 10.04  |
| P00924 ENO1_YEAST Enolase 1                            | 15 |                    | WMGK                                 | 56  | 4  | 1  | 12.78  | y3                                            | 521.26  | 24.780  | 1946   | 1 | 521.26  | 2.11   |
| P00924 ENO1_YEAST Enolase 1                            | 16 |                    | AAQDSFAAGWGVMSVSHR                   | 358 | 17 | 3  | 23.66  | b3b11b15                                      | 1789.84 | 95.450  | 1789   | 2 | 895.42  | -3.55  |
| P00924 ENO1_YEAST Enolase 1                            | 17 |                    | SKWLTGPQLADLYHSLMK                   | 270 | 18 | 4  | 15.53  | b3y6°y6y9                                     | 2088.11 | 84.733  | 330419 | 3 | 696.71  | 7.48   |
| P00924 ENO1_YEAST Enolase 1                            | 18 |                    | WMGKGVLHAVK                          | 56  | 11 | 3  | 24.23  | b5b7y3                                        | 1225.70 | 40.775  | 28655  | 3 | 409.24  | 11.55  |
| P00924 ENO1_YEAST Enolase 1                            | 19 |                    | IEEELGDNVAFAGENFHHGDKL               | 415 | 22 | 5  | 40.32  | b3b4b5y7y12                                   | 2441.13 | 64.592  | 16883  | 3 | 814.38  | -1.70  |
| P00924 ENO1_YEAST Enolase 1                            | 20 |                    | AAQDSFAAGWGVMSVSHRSGETE DTFIADLVVGLR | 358 | 34 | 3  | 22.28  | b8b9y31                                       | 3592.77 | 99.784  | 14936  | 4 | 898.95  | 5.91   |
| P00924 ENO1_YEAST Enolase 1                            | 21 |                    | DQKAVDDFLISLDGTANK                   | 85  | 18 | 6  | 29.06  | b5°b5*b5b10y5y6                               | 1950.00 | 74.325  | 5497   | 3 | 650.67  | 7.89   |
| P00924 ENO1_YEAST Enolase 1                            | 22 |                    | VYARSVYDSR                           | 5   | 10 | 4  | 28.59  | b6°b6b7y3                                     | 1215.63 | 26.324  | 2024   | 2 | 608.32  | 12.95  |
| P00924 ENO1_YEAST Enolase 1                            | 23 | Phosphoryl STY(12) | TAGIQIVADDLTVTNPKR                   | 312 | 18 | 7  | 48.08  | b5*b5b10b12b13y11y12                          | 1992.00 | 93.812  | 2286   | 3 | 664.67  | -4.60  |
| P00924 ENO1_YEAST Enolase 1                            | 24 | Oxidation+M(17)    | SIVPSGASTGVHEALEMR                   | 32  | 18 | 3  | 15.53  | b7y11y15                                      | 1856.91 | 54.554  | 15282  | 3 | 619.64  | -6.38  |
| P00924 ENO1_YEAST Enolase 1                            | 25 |                    | PSGASTGVHEALEMR                      | 35  | 15 | 2  | 13.48  | b8b13                                         | 1541.74 | 61.986  | 4132   | 2 | 771.37  | 2.53   |
| P00924 ENO1_YEAST Enolase 1                            | 26 |                    | ADDLTVTNPK                           | 319 | 10 | 0  | 4.88   |                                               | 1073.54 | 72.923  | 1647   | 2 | 537.27  | -11.37 |
| P0A7K0 RL11_SALTY 50S ribosomal protein L11            | 1  |                    | AQLQEIAQTK                           | 103 | 10 | 19 | 126.15 | b2*b2b3*b3b4b6y2y3°y3*y3y4y5y6y7*y7y8*y8y9y10 | 1129.61 | 39.770  | 78024  | 2 | 565.31  | -8.32  |
| P0A7K0 RL11_SALTY 50S ribosomal protein L11            | 2  |                    | AADMTGADIEAMTR                       | 113 | 14 | 5  | 27.79  | y2y4y7y9y14                                   | 1452.65 | 58.177  | 53074  | 2 | 726.83  | 2.44   |
| P0A7K0 RL11_SALTY 50S ribosomal protein L11            | 3  |                    | TPPAAVLLK                            | 72  | 9  | 4  | 38.19  | y5y7y8y9                                      | 909.57  | 55.003  | 41494  | 2 | 455.29  | -11.07 |
| P0A7K0 RL11_SALTY 50S ribosomal protein L11            | 4  |                    | GLPIPVITVYADR                        | 51  | 14 | 5  | 19.22  | b4y1y5y10y14                                  | 1512.88 | 91.259  | 28673  | 2 | 756.94  | 0.16   |
| P0A7K0 RL11_SALTY 50S ribosomal protein L11            | 5  |                    | AQLQEIAQTKAADMTGADIEAMTR             | 103 | 24 | 5  | 23.36  | b9y5y6°y6y9                                   | 2563.27 | 75.877  | 3846   | 3 | 855.10  | 8.95   |
| P0A7K0 RL11_SALTY 50S ribosomal protein L11            | 6  |                    | SGSGKPNKDK                           | 87  | 10 | 3  | 33.82  | b6b8b9                                        | 1017.52 | 33.953  | 1998   | 2 | 509.26  | -14.10 |
| P0A7K0 RL11_SALTY 50S ribosomal protein L11            | 7  |                    | PAAVLLK                              | 74  | 7  | 0  | 1.63   |                                               | 711.48  | 54.959  | 1837   | 1 | 711.48  | 9.09   |
| P0A2C5 RBSB_SALTY D-ribose-binding periplasmic protein | 1  |                    | ILLINPTSDSAVGNAVK                    | 84  | 17 | 16 | 142.37 | b2b3b4b5y5y7y8y9y10y11y12*y12y13*y13y14y17    | 1739.95 | 71.264  | 110910 | 2 | 870.48  | -0.28  |
| P0A2C5 RBSB_SALTY D-ribose-binding periplasmic protein | 2  |                    | LAATIAQLPDQIGAK                      | 253 | 15 | 12 | 88.8   | b2b4°b4y3y4y6y7y8y9*y9y10y15                  | 1509.87 | 66.932  | 52652  | 2 | 755.44  | 1.94   |
| P0A2C5 RBSB_SALTY D-ribose-binding periplasmic protein | 3  |                    | VIELQGIAGTSAAR                       | 150 | 14 | 11 | 112.83 | b1b3y4y5y6y7y9y10y11y12y14                    | 1385.78 | 59.734  | 40088  | 2 | 693.39  | 1.94   |
| P0A2C5 RBSB_SALTY D-ribose-binding periplasmic protein | 4  |                    | GLNVMQNLLTAHPDVQAVFAQNDEMALGALR      | 193 | 31 | 6  | 22.91  | b11y4y6y8y11y31                               | 3336.71 | 102.670 | 35552  | 3 | 1112.91 | 7.02   |
| P0A2C5 RBSB_SALTY D-ribose-binding periplasmic protein | 5  |                    | ADVMMVVGFDGTPDGEK                    | 231 | 16 | 6  | 42.53  | b5°b5y7y10y11y12                              | 1636.78 | 64.281  | 20066  | 2 | 818.89  | 14.69  |
| P0A2C5 RBSB_SALTY D-ribose-binding periplasmic protein | 6  |                    | FNVLASQPADEFDR                       | 178 | 13 | 7  | 54.4   | b3b7*b7y3y6y9y10                              | 1479.72 | 66.998  | 11355  | 2 | 740.37  | 0.91   |
| P0A2C5 RBSB_SALTY D-ribose-binding periplasmic protein | 7  |                    | GDVVSHIASDNVLGGK                     | 119 | 16 | 4  | 24.17  | b13b15y4y15                                   | 1567.82 | 74.302  | 9805   | 2 | 784.41  | 5.45   |
| P0A2C5 RBSB_SALTY D-ribose-binding periplasmic protein | 8  |                    | DTIALVISTLNNPFFVSLKDGAQKEADK         | 26  | 28 | 8  | 25.27  | b2°b2y1y4y8*y8y19y25                          | 3034.57 | 114.497 | 9222   | 4 | 759.40  | -13.03 |
| P0A2C5 RBSB_SALTY D-ribose-binding periplasmic protein | 9  |                    | IPVITLDR                             | 107 | 8  | 3  | 33.01  | b3y5y6                                        | 926.55  | 62.487  | 59821  | 2 | 463.78  | -16.34 |
| P0A2C5 RBSB_SALTY D-ribose-binding periplasmic protein | 10 |                    | ELANVQDLTVR                          | 70  | 11 | 11 | 89.54  | b3°b3b4°b4b6b8°b8b10y6*y6y8                   | 1257.67 | 58.486  | 14591  | 2 | 629.34  | -8.35  |

|                                                         |    |                       |                               |     |    |    |        |                                                   |         |         |        |   |         |        |
|---------------------------------------------------------|----|-----------------------|-------------------------------|-----|----|----|--------|---------------------------------------------------|---------|---------|--------|---|---------|--------|
| [P0A2C5]RBSB_SALTY D-ribose-binding periplasmic protein | 11 |                       | LVIK                          | 291 | 4  | 1  | 12.78  | y3                                                | 472.35  | 57.004  | 10197  | 1 | 472.35  | -7.69  |
| [P0A2C5]RBSB_SALTY D-ribose-binding periplasmic protein | 12 |                       | MANQAK                        | 101 | 6  | 1  | 13.6   | b5                                                | 662.34  | 54.220  | 5613   | 1 | 662.34  | 15.02  |
| [P0A2C5]RBSB_SALTY D-ribose-binding periplasmic protein | 13 |                       | GEGFQQAVAAHK                  | 166 | 12 | 9  | 59.44  | b3°b3b5b7b8°b8°b8y4y9                             | 1242.61 | 35.295  | 3527   | 2 | 621.81  | -6.68  |
| [P0A2C5]RBSB_SALTY D-ribose-binding periplasmic protein | 14 |                       | GTKILLINPTSDAVGNAVK           | 81  | 20 | 7  | 23.74  | y9*y9y10*y10y12°y12*y12                           | 2026.10 | 58.464  | 17728  | 3 | 676.04  | -10.54 |
| [P0A2C5]RBSB_SALTY D-ribose-binding periplasmic protein | 15 |                       | FNVLASQPADFRTK                | 178 | 15 | 4  | 31.72  | b11b12y7y10                                       | 1708.84 | 60.807  | 14451  | 3 | 570.29  | -13.64 |
| [P0A2C5]RBSB_SALTY D-ribose-binding periplasmic protein | 16 |                       | ADVMVVGFDGTPDGEKAVK           | 231 | 19 | 13 | 75.21  | b3°b3b5b6°b6b9b12b14°b14y3y12y13°y13              | 1934.94 | 60.887  | 9071   | 3 | 645.65  | -9.08  |
| [P0A2C5]RBSB_SALTY D-ribose-binding periplasmic protein | 17 | Phosphoryl STY(9)     | ILLINPTSDAVGNAVK              | 84  | 17 | 3  | 16.26  | b9b13y8                                           | 1819.90 | 91.140  | 4102   | 3 | 607.30  | -7.04  |
| [Q8ZKQ1]LSRB_SALTY Autoinducer 2-binding protein lsrB   | 1  |                       | NNLAIVGFSTPNVMRPYVQR          | 237 | 20 | 16 | 88.11  | b2°b2b3°b3b4°b4b5°b5y5y12°y12y14y15y16y17y20      | 2276.18 | 78.232  | 124280 | 3 | 759.40  | -5.26  |
| [Q8ZKQ1]LSRB_SALTY Autoinducer 2-binding protein lsrB   | 2  |                       | AYPDLDAIHAPDANALPAAAQAAE NLKR | 209 | 28 | 13 | 87.37  | b2b7b8°b8b9b10y9y12y18y19y20y23y28                | 2863.50 | 87.659  | 121405 | 3 | 955.17  | 1.36   |
| [Q8ZKQ1]LSRB_SALTY Autoinducer 2-binding protein lsrB   | 3  |                       | ISQEHPGWEIVTTQFGYNDATK        | 177 | 22 | 14 | 98.02  | b5b9b11b13°b13y4y5*y5y6y7y8y9*y9y22               | 2521.20 | 73.234  | 80802  | 3 | 841.07  | 1.07   |
| [Q8ZKQ1]LSRB_SALTY Autoinducer 2-binding protein lsrB   | 4  |                       | VAFFYSSPTVTDQNQWVK            | 154 | 18 | 11 | 79.86  | b5b6b9b12y8°y8y11y12y13y14y18                     | 2117.05 | 77.964  | 60179  | 2 | 1059.03 | 7.38   |
| [Q8ZKQ1]LSRB_SALTY Autoinducer 2-binding protein lsrB   | 5  | Carbamidomethyl+C(12) | ILTWSDTKPECR                  | 111 | 13 | 10 | 62.57  | b1b2b9y2y4y6y7y8y9y13                             | 1620.75 | 50.912  | 59771  | 3 | 540.92  | -10.02 |
| [Q8ZKQ1]LSRB_SALTY Autoinducer 2-binding protein lsrB   | 6  |                       | LVGVGFFTSGGNGAQEAGK           | 35  | 19 | 19 | 96.36  | b1b2b4b6b12b16y1y3y4y5*y5y7°y7*y7y11y12°y12y17y19 | 1795.92 | 89.885  | 59644  | 3 | 599.31  | 12.23  |
| [Q8ZKQ1]LSRB_SALTY Autoinducer 2-binding protein lsrB   | 7  |                       | ISVYVANALLK                   | 273 | 11 | 8  | 65.38  | b2y2y3y5y6y7y8y11                                 | 1190.71 | 74.019  | 57897  | 2 | 595.86  | -5.74  |
| [Q8ZKQ1]LSRB_SALTY Autoinducer 2-binding protein lsrB   | 8  |                       | SLQTAEGIIK                    | 199 | 10 | 5  | 33.82  | y2y4y6y7y10                                       | 1059.60 | 51.762  | 48897  | 2 | 530.30  | -6.80  |
| [Q8ZKQ1]LSRB_SALTY Autoinducer 2-binding protein lsrB   | 9  |                       | NMPMNVGDSLDIPGIGK             | 284 | 17 | 12 | 44.94  | b2b6b12b13°b13y2y11y14*y14y15*y15y17              | 1757.87 | 79.768  | 43550  | 2 | 879.44  | 5.56   |
| [Q8ZKQ1]LSRB_SALTY Autoinducer 2-binding protein lsrB   | 10 |                       | VTVSPNSEQGYHYEAK              | 301 | 16 | 14 | 121.19 | b8y2y4°y4y5y7y8°y8y9y10y12y14y15y16               | 1808.82 | 37.215  | 43272  | 3 | 603.61  | -14.51 |
| [Q8ZKQ1]LSRB_SALTY Autoinducer 2-binding protein lsrB   | 11 |                       | GTVKEFGLWDVVQQGK              | 257 | 16 | 8  | 28.25  | b7°b7y4*y4y7*y7y8y16                              | 1790.92 | 76.507  | 36753  | 3 | 597.64  | -13.97 |
| [Q8ZKQ1]LSRB_SALTY Autoinducer 2-binding protein lsrB   | 12 |                       | EFGLWDVVQQGK                  | 261 | 12 | 11 | 63.42  | b3b4b5°b5b10y1y2y3*y3y4y12                        | 1405.71 | 82.740  | 27758  | 2 | 703.36  | -1.13  |
| [Q8ZKQ1]LSRB_SALTY Autoinducer 2-binding protein lsrB   | 13 |                       | VIFNKDNIDK                    | 327 | 10 | 5  | 28.59  | b1b9y7y8y10                                       | 1205.67 | 77.867  | 4071   | 2 | 603.34  | 11.85  |
| [Q8ZKQ1]LSRB_SALTY Autoinducer 2-binding protein lsrB   | 14 |                       | NGGIVLLPER                    | 317 | 10 | 4  | 51.78  | y3y4y5y6                                          | 1067.61 | 62.097  | 26008  | 2 | 534.31  | -9.95  |
| [Q8ZKQ1]LSRB_SALTY Autoinducer 2-binding protein lsrB   | 15 |                       | AYPDLDAIHAPDANALPAAAQAAE NLK  | 209 | 27 | 4  | 27.08  | b3b11b12b14                                       | 2707.38 | 65.482  | 3457   | 3 | 903.13  | -3.97  |
| [Q8ZKQ1]LSRB_SALTY Autoinducer 2-binding protein lsrB   | 16 |                       | AKISQEHPGWEIVTTQFGYNDAT K     | 175 | 24 | 4  | 12.67  | b7b12°b12y7                                       | 2720.33 | 69.469  | 12304  | 3 | 907.45  | -1.35  |
| [Q8ZKQ1]LSRB_SALTY Autoinducer 2-binding protein lsrB   | 17 |                       | AKVAFFYSSPTVTDQNQWVK          | 152 | 20 | 3  | 21.11  | y8y10y12                                          | 2316.18 | 82.978  | 10333  | 2 | 1158.59 | 7.06   |
| [Q8ZKQ1]LSRB_SALTY Autoinducer 2-binding protein lsrB   | 18 | Carbamidomethyl+C(12) | ILTWSDTKPECRSYIINQGTPK        | 111 | 23 | 3  | 13.01  | b11y3y6                                           | 2772.34 | 111.202 | 3573   | 3 | 924.79  | 4.67   |
| [Q8ZKQ1]LSRB_SALTY Autoinducer 2-binding protein lsrB   | 19 | Oxidation+M(5)        | QLGSMLEVMAAHQVDK              | 134 | 16 | 5  | 44.35  | b5b11y8y9y10                                      | 1772.87 | 115.296 | 5317   | 2 | 886.94  | 1.93   |
| [Q8ZKQ1]LSRB_SALTY Autoinducer 2-binding protein lsrB   | 20 | Oxidation+M(9)        | QLGSMLEVMAAHQVDKEK            | 134 | 18 | 4  | 22.93  | b4°b4b5y6                                         | 2030.01 | 67.741  | 2212   | 3 | 677.34  | 1.80   |
| [Q8ZKQ1]LSRB_SALTY Autoinducer 2-binding protein lsrB   | 21 |                       | AYPDLDAI                      | 209 | 8  | 0  | 9.36   |                                                   | 877.43  | 87.614  | 1678   | 1 | 877.43  | -3.62  |

|                                            |    |  |                                 |     |    |    |        |                                                 |         |        |        |   |         |        |
|--------------------------------------------|----|--|---------------------------------|-----|----|----|--------|-------------------------------------------------|---------|--------|--------|---|---------|--------|
| P0A9Y9 CC_SALTY Cold shock-like protein cC | 1  |  | GFGFITPADGSK                    | 15  | 12 | 19 | 187.51 | b2b3b4b5b6b8b10y3°y3y4y5y6°y6y7°y7y8y9y10y12    | 1196.58 | 65.005 | 260922 | 2 | 598.80  | -8.98  |
| P0A9Y9 CC_SALTY Cold shock-like protein cC | 2  |  | GFGFITPADGSKDVFVHFSAIQGN GFK    | 15  | 27 | 8  | 38.99  | b2b3b4y4y6y10y21y27                             | 2843.38 | 87.388 | 64831  | 4 | 711.60  | -10.99 |
| P0A9Y9 CC_SALTY Cold shock-like protein cC | 3  |  | DVFVHFSAIQNGGFK                 | 27  | 15 | 5  | 18.08  | b6y4*y4y11y15                                   | 1665.85 | 54.761 | 4995   | 3 | 555.95  | 6.08   |
| P0A9Y9 CC_SALTY Cold shock-like protein cC | 4  |  | TLAEGQNVEFEIQDGQK               | 42  | 17 | 4  | 16.26  | b4b10*b10y9                                     | 1905.93 | 56.160 | 1730   | 2 | 953.47  | 3.97   |
| P0A9Y9 CC_SALTY Cold shock-like protein cC | 5  |  | WFNESKGFGFITPADGSK              | 9   | 18 | 5  | 32.63  | b3b5b6y4y7                                      | 1987.96 | 73.217 | 5097   | 2 | 994.48  | 0.74   |
| Q8ZQT5 TOLB_SALTY Protein tolB             | 1  |  | VSDYDGYNQFVVHR                  | 183 | 14 | 4  | 27.79  | y2y4y7y9                                        | 1698.77 | 54.642 | 110864 | 3 | 566.93  | -10.06 |
| Q8ZQT5 TOLB_SALTY Protein tolB             | 2  |  | SNNTEPTWFPDSQTLAFTSDQAG RPQVYK  | 287 | 29 | 16 | 69.21  | b4°b4b5°b5*b5y2y11*y11y12y14°y14y20y21y22y24y29 | 3285.56 | 77.886 | 93508  | 3 | 1095.86 | 4.38   |
| Q8ZQT5 TOLB_SALTY Protein tolB             | 3  |  | IEITQGVSARPIGVVPPFK             | 24  | 19 | 13 | 56.41  | b2b8*b8b9b11°b11y1y2y3y14y15y16y19              | 2026.11 | 70.907 | 65015  | 3 | 676.04  | -13.25 |
| Q8ZQT5 TOLB_SALTY Protein tolB             | 4  |  | WAGPGAAPEDIGGIVAADLR            | 43  | 20 | 13 | 90.64  | b4b6b7b13b14°b14y2y4y5y6y13y14y20               | 1935.99 | 85.637 | 48742  | 2 | 968.50  | 0.95   |
| Q8ZQT5 TOLB_SALTY Protein tolB             | 5  |  | LPATDGQVK                       | 413 | 9  | 5  | 54.39  | y5y6y7y8y9                                      | 928.51  | 28.635 | 47968  | 2 | 464.76  | 2.70   |
| Q8ZQT5 TOLB_SALTY Protein tolB             | 6  |  | MNINGGAAQR                      | 316 | 10 | 12 | 88.34  | b2*b2b3b4y1y3y6y7*y7y8y9y10                     | 1031.49 | 28.728 | 44319  | 2 | 516.25  | -11.12 |
| Q8ZQT5 TOLB_SALTY Protein tolB             | 7  |  | SPQPLMSPA WSPDGSK               | 197 | 16 | 4  | 38.79  | y3y5y9y13                                       | 1684.81 | 63.324 | 44069  | 2 | 842.91  | 6.45   |
| Q8ZQT5 TOLB_SALTY Protein tolB             | 8  |  | IAYVVQTNGGQFPYELR               | 166 | 17 | 10 | 60.8   | y2y5°y5y6y9y11y12*y12y13*y13                    | 1955.02 | 73.725 | 40956  | 2 | 978.01  | 6.87   |
| Q8ZQT5 TOLB_SALTY Protein tolB             | 9  |  | SALVIQTLANGAVR                  | 223 | 14 | 9  | 73.95  | b3b4y2y5y7y8y9y10y14                            | 1412.82 | 71.265 | 38150  | 2 | 706.91  | -2.07  |
| Q8ZQT5 TOLB_SALTY Protein tolB             | 10 |  | TGSLNLYVMDLASGQIR               | 264 | 17 | 3  | 16.26  | b12y3y9                                         | 1837.95 | 89.572 | 15471  | 2 | 919.48  | -0.33  |
| Q8ZQT5 TOLB_SALTY Protein tolB             | 11 |  | LAFALSK                         | 257 | 7  | 4  | 50.56  | b4y3y5y6                                        | 749.44  | 57.093 | 10230  | 2 | 375.22  | -17.51 |
| Q8ZQT5 TOLB_SALTY Protein tolB             | 12 |  | HNGAPAFSPDGTK                   | 244 | 13 | 3  | 20.57  | b5y4y6                                          | 1298.61 | 67.898 | 8109   | 2 | 649.81  | 0.94   |
| Q8ZQT5 TOLB_SALTY Protein tolB             | 13 |  | QITDGR                          | 281 | 6  | 1  | 13.6   | y3                                              | 689.35  | 82.298 | 3456   | 1 | 689.35  | -13.28 |
| Q8ZQT5 TOLB_SALTY Protein tolB             | 14 |  | HNGAPAFSPDGTKLAFALSK            | 244 | 20 | 9  | 88.58  | b3b4b5b6b7b9b11b14y3                            | 2029.04 | 67.075 | 32737  | 3 | 677.02  | -6.08  |
| Q8ZQT5 TOLB_SALTY Protein tolB             | 15 |  | SPQPLMSPA WSPDGSKLAYVTFES GR    | 197 | 26 | 5  | 27.39  | b12y5y6y15y23                                   | 2808.37 | 81.271 | 31533  | 3 | 936.80  | 3.04   |
| Q8ZQT5 TOLB_SALTY Protein tolB             | 16 |  | VSDYDGYNQFVVHRSPQPLMSPA WSPDGSK | 183 | 30 | 3  | 11.36  | b3y3y8                                          | 3364.54 | 70.466 | 4419   | 4 | 841.89  | -7.98  |
| Q8ZQT5 TOLB_SALTY Protein tolB             | 17 |  | QVASFPRHNGAPAFSPDGTK            | 237 | 20 | 5  | 35.96  | b12y6°y6y7y8                                    | 2084.01 | 88.706 | 1963   | 2 | 1042.51 | -7.97  |
| P66932 TIG_SALTY Trigger factor            | 1  |  | NVALEEQA VEAVLAK                | 399 | 15 | 19 | 134.57 | b1*b1b2b3b4b8°b8b12b13b14y1y2y3y4y5y11y12y13y15 | 1583.86 | 80.286 | 54690  | 2 | 792.43  | -1.62  |
| P66932 TIG_SALTY Trigger factor            | 2  |  | ANDIDVPSALIDSEIDLRR             | 296 | 20 | 10 | 63.46  | b2b3b4b5b7b13b14y1y14y16                        | 2211.16 | 90.613 | 43228  | 3 | 737.72  | -1.77  |
| P66932 TIG_SALTY Trigger factor            | 3  |  | GLIEEMASAYEDPKEVIEFYK           | 368 | 22 | 7  | 37.61  | b2b6b7y5y6y8y22                                 | 2548.18 | 81.897 | 27561  | 3 | 850.06  | -14.75 |
| P66932 TIG_SALTY Trigger factor            | 4  |  | ELPELTEEFIKR                    | 243 | 12 | 5  | 22.21  | b7°b7y4y10y12                                   | 1503.79 | 71.797 | 16903  | 3 | 501.93  | -13.47 |
| P66932 TIG_SALTY Trigger factor            | 5  |  | FGVEDGSVAGLR                    | 255 | 12 | 8  | 47.04  | b2b3b9b11y1y7y9y12                              | 1206.61 | 58.026 | 14753  | 2 | 603.81  | -4.35  |
| P66932 TIG_SALTY Trigger factor            | 6  |  | INPAGAPNYVPGEYK                 | 83  | 15 | 7  | 48.25  | b9b10b12y3y8*y8y10                              | 1589.79 | 62.040 | 13160  | 2 | 795.40  | -5.22  |

|                                       |    |                   |                                 |     |    |    |        |                                               |         |         |       |   |         |        |
|---------------------------------------|----|-------------------|---------------------------------|-----|----|----|--------|-----------------------------------------------|---------|---------|-------|---|---------|--------|
| P66932 TIG_SALTY Trigger factor       | 7  |                   | VTIDFTGSVDGEEFEGGK              | 163 | 18 | 5  | 22.93  | b2°b2b9y5y6                                   | 1886.87 | 53.288  | 9696  | 4 | 472.47  | 2.52   |
| P66932 TIG_SALTY Trigger factor       | 8  |                   | ANDIDVPSALIDSEIDVLR             | 296 | 19 | 11 | 40.21  | b4°b4*b4b6°b6b15*b15y3y13y14y19               | 2055.07 | 94.681  | 9392  | 2 | 1028.04 | 6.18   |
| P66932 TIG_SALTY Trigger factor       | 9  |                   | ATSFNELMNQQA                    | 420 | 12 | 3  | 26.19  | b8b9y11                                       | 1353.61 | 50.686  | 4725  | 3 | 451.87  | -2.34  |
| P66932 TIG_SALTY Trigger factor       | 10 |                   | ELFEEQAK                        | 334 | 8  | 7  | 50.97  | b2b5b7y2y5y6y8                                | 993.50  | 63.845  | 4713  | 2 | 497.26  | 14.74  |
| P66932 TIG_SALTY Trigger factor       | 11 |                   | NKELMDNMR                       | 390 | 9  | 6  | 30.41  | b1b3°b3*b3b4y7                                | 1150.53 | 36.214  | 4685  | 2 | 575.77  | -5.84  |
| P66932 TIG_SALTY Trigger factor       | 12 |                   | MQVSVETTQGLGR                   | 0   | 13 | 3  | 20.57  | b7b10y6                                       | 1405.71 | 59.304  | 3030  | 2 | 703.36  | -2.26  |
| P66932 TIG_SALTY Trigger factor       | 13 |                   | MIPGFEDGVK                      | 193 | 10 | 4  | 40.02  | b3b4b6y7                                      | 1092.52 | 59.150  | 9539  | 2 | 546.76  | -19.11 |
| P66932 TIG_SALTY Trigger factor       | 14 |                   | ATDFVLAMGQGR                    | 181 | 12 | 9  | 82.17  | b4b5°b5b8°b8y4y6y8y11                         | 1265.62 | 57.453  | 2758  | 2 | 633.31  | -9.26  |
| P66932 TIG_SALTY Trigger factor       | 15 |                   | VTITIAADSIETAVK                 | 14  | 15 | 4  | 24.1   | b11°b11b12y9                                  | 1531.83 | 76.552  | 2669  | 2 | 766.42  | -20.24 |
| P66932 TIG_SALTY Trigger factor       | 16 |                   | VTIDFTGSVDGEEFEGGKATDFVLAMGQGR  | 163 | 30 | 8  | 26.26  | b10b13°b13y4y8*y8y12y14                       | 3133.48 | 79.501  | 16094 | 3 | 1045.16 | -1.01  |
| P66932 TIG_SALTY Trigger factor       | 17 |                   | AGEEFTIDVTFPEEYHAENLK GK        | 206 | 23 | 4  | 34.85  | b9b10b11°b11                                  | 2624.27 | 62.590  | 11636 | 3 | 875.43  | 8.56   |
| P66932 TIG_SALTY Trigger factor       | 18 |                   | EKINPAGAPNYVPGEYK               | 81  | 17 | 3  | 16.26  | b11b14y11                                     | 1846.92 | 76.365  | 11089 | 3 | 616.31  | -6.08  |
| P66932 TIG_SALTY Trigger factor       | 19 |                   | RFGVEDGSVAGLR                   | 254 | 13 | 3  | 35.04  | b6b7b8                                        | 1362.69 | 49.859  | 6043  | 3 | 454.90  | -13.08 |
| P66932 TIG_SALTY Trigger factor       | 20 | Phosphoryl.STY(6) | ELPELTEEFIKR                    | 243 | 12 | 4  | 36.07  | b4b10y7_H3PO4 y7y8                            | 1583.76 | 70.394  | 4769  | 2 | 792.39  | 1.39   |
| P66932 TIG_SALTY Trigger factor       | 21 | Oxidation+M()     | GLIEEMASAYEDPKEVIEFYSK          | 368 | 22 | 5  | 20.79  | b3b6b10°b10y11                                | 2564.22 | 82.158  | 4328  | 2 | 1282.61 | 4.28   |
| P66932 TIG_SALTY Trigger factor       | 22 | Oxidation+M(1)    | MQVSVETTQGLGR                   | 0   | 13 | 4  | 39.2   | b4b5b6y8                                      | 1421.71 | 73.814  | 1849  | 2 | 711.36  | 0.00   |
| P0A1E3 CYSK_SALTY Cysteine synthase A | 1  |                   | YLSTALFADLFTEKELQQ              | 305 | 18 | 18 | 105.57 | b2b4°b4b5°b5b8b11b15b16y2y5y6y7°y7*y7y8y12y18 | 2117.10 | 102.319 | 86257 | 2 | 1059.05 | 8.30   |
| P0A1E3 CYSK_SALTY Cysteine synthase A | 2  |                   | GVLKPGVELVEPTSGNTGIALAYVAAAR    | 56  | 28 | 5  | 26.78  | y3y4y7y17y28                                  | 2753.52 | 81.521  | 78100 | 3 | 918.51  | 1.33   |
| P0A1E3 CYSK_SALTY Cysteine synthase A | 3  |                   | IQGIGAGFIPGNLDLK                | 226 | 16 | 9  | 41.18  | b2*b2b3b4y2y3y7y10y16                         | 1612.91 | 83.530  | 74085 | 2 | 806.96  | 0.23   |
| P0A1E3 CYSK_SALTY Cysteine synthase A | 4  |                   | YLLLQQFSNPANPEIHEK              | 137 | 18 | 11 | 49.88  | b2b3b5b12°b12b13°b13y3y7y9y18                 | 2141.09 | 74.374  | 63620 | 3 | 714.37  | -5.02  |
| P0A1E3 CYSK_SALTY Cysteine synthase A | 5  |                   | LTLTMPETMSIER                   | 87  | 13 | 12 | 58.41  | b2°b2b13°b13y1y6y8y9°y9y10y12y13              | 1521.77 | 74.339  | 58557 | 2 | 761.39  | 2.41   |
| P0A1E3 CYSK_SALTY Cysteine synthase A | 6  |                   | NIVVILPSSGER                    | 293 | 12 | 9  | 77.4   | b2b3b4b5y6y8y9y10y12                          | 1283.72 | 64.657  | 30816 | 2 | 642.36  | -7.61  |
| P0A1E3 CYSK_SALTY Cysteine synthase A | 7  |                   | ALGANLVLTEGAK                   | 105 | 13 | 5  | 29.82  | b2y5y7y11y13                                  | 1256.72 | 61.850  | 23892 | 2 | 628.86  | 0.49   |
| P0A1E3 CYSK_SALTY Cysteine synthase A | 8  |                   | IYEDNSLTIGHTPLVR                | 3   | 16 | 3  | 17.1   | b8y7y14                                       | 1827.93 | 62.295  | 46535 | 3 | 609.98  | -13.89 |
| P0A1E3 CYSK_SALTY Cysteine synthase A | 9  |                   | IGNGR                           | 22  | 5  | 2  | 26.38  | b4y4                                          | 516.28  | 37.506  | 43796 | 1 | 516.28  | -14.30 |
| P0A1E3 CYSK_SALTY Cysteine synthase A | 10 |                   | AEEIVASDPQK                     | 126 | 11 | 3  | 24.23  | b5b7y8                                        | 1186.62 | 64.268  | 4272  | 2 | 593.81  | 19.44  |
| P0A1E3 CYSK_SALTY Cysteine synthase A | 11 |                   | VVGITNEEAISTAR                  | 246 | 14 | 7  | 50.55  | b9b11y3y7y12y13°y13                           | 1459.78 | 53.200  | 1837  | 2 | 730.39  | 4.77   |
| P0A1E3 CYSK_SALTY Cysteine synthase A | 12 |                   | IGANMIWDAEK                     | 44  | 11 | 3  | 35.99  | b5b6b7                                        | 1247.62 | 59.313  | 1704  | 2 | 624.31  | 6.46   |
| P0A1E3 CYSK_SALTY Cysteine synthase A | 13 |                   | TDLITVAVEPTDSPVIAQALAGEEIKPGPHK | 195 | 31 | 4  | 13.8   | b6b11y10y14                                   | 3196.72 | 106.351 | 1584  | 4 | 799.93  | 2.21   |

|                                        |    |                       |                                     |     |    |    |        |                                                      |         |         |        |   |         |        |
|----------------------------------------|----|-----------------------|-------------------------------------|-----|----|----|--------|------------------------------------------------------|---------|---------|--------|---|---------|--------|
| [P0A1E3]CYSK_SALTY Cysteine synthase A | 14 |                       | LIDKVVGITNEEAISTAR                  | 242 | 18 | 5  | 47.23  | y4y5y10y12y13                                        | 1929.07 | 60.326  | 66283  | 2 | 965.04  | 3.29   |
| [P0A1E3]CYSK_SALTY Cysteine synthase A | 15 |                       | GKTDLTITVAVEPTDSPVIAQALAG EEIKPGPHK | 193 | 33 | 5  | 21.85  | b14y5y11y20y22                                       | 3381.79 | 79.641  | 64305  | 4 | 846.20  | -10.61 |
| [P0A1E3]CYSK_SALTY Cysteine synthase A | 16 |                       | AEEIVASDPQKYLLLLQQFSNPANP EIHEK     | 126 | 29 | 7  | 43.61  | b3b4b5°b5y7y9y11                                     | 3308.66 | 77.261  | 31887  | 4 | 827.92  | -7.31  |
| [P0A1E3]CYSK_SALTY Cysteine synthase A | 17 |                       | RLMEEEGILAGISSGA AVAAALK            | 260 | 23 | 4  | 19.41  | b7b9b12°b12                                          | 2257.20 | 90.528  | 6953   | 3 | 753.07  | -11.36 |
| [P0A1E3]CYSK_SALTY Cysteine synthase A | 18 |                       | LMEEEGILAGISSGA AVAAALKLQ EDESFTNK  | 261 | 32 | 3  | 11.13  | b8b10y11                                             | 3292.65 | 126.387 | 2381   | 3 | 1098.22 | -3.41  |
| [P0A1E3]CYSK_SALTY Cysteine synthase A | 19 | Phosphoryl STY(11)    | TDLITVAVEPTDSPVIAQALAGEEI KPGPHK    | 195 | 31 | 3  | 11.23  | b9y5y22                                              | 3276.70 | 128.618 | 31740  | 3 | 1092.90 | 9.16   |
| [P0A1E3]CYSK_SALTY Cysteine synthase A | 20 | Phosphoryl STY(8)     | NIVVILPSSGER                        | 293 | 12 | 4  | 26.19  | b10y3°y3y4                                           | 1363.68 | 70.514  | 1636   | 2 | 682.34  | -9.31  |
| [P0A1E3]CYSK_SALTY Cysteine synthase A | 21 |                       | LTMPETMSIER                         | 89  | 11 | 1  | 7.42   | b4                                                   | 1307.64 | 74.336  | 10445  | 3 | 436.55  | 6.91   |
| [P0A1D3]CH60_SALTY 60 kDa chaperonin   | 1  |                       | GYLSPYFINKPETGAVELESPFILL ADKK      | 197 | 29 | 21 | 136.22 | b2b3b4°b4b7b11y1y2y3y4 y5y6y7y9y11y13y19y22y25y26y29 | 3239.71 | 95.619  | 138769 | 4 | 810.68  | -3.17  |
| [P0A1D3]CH60_SALTY 60 kDa chaperonin   | 2  |                       | EMLPVLEAVAK                         | 231 | 11 | 12 | 86.99  | b2°b2b3y1y2y3y4y5y6y7y8y11                           | 1199.66 | 80.236  | 110698 | 2 | 600.33  | -6.72  |
| [P0A1D3]CH60_SALTY 60 kDa chaperonin   | 3  |                       | ANDAAGDGT TTATVLAQSIITEGL K         | 80  | 25 | 20 | 158.44 | b2b3°b3b4°b4°b4b5b6b14 b15°b15y3y4y5y6y7y8y9y10y25   | 2418.22 | 92.160  | 93635  | 3 | 806.75  | -4.85  |
| [P0A1D3]CH60_SALTY 60 kDa chaperonin   | 4  | Carbamidomethyl+C(18) | SALQYAASVAGLMITTECMVTDL PK          | 501 | 25 | 18 | 139.52 | b4b5°b5b6b7°b7b8b9b10b13y2y3y4y5y6y8y11°y11          | 2670.32 | 124.224 | 69495  | 3 | 890.78  | 0.91   |
| [P0A1D3]CH60_SALTY 60 kDa chaperonin   | 5  |                       | VVINKD TTTIIDGVGEEAAIQGR            | 322 | 23 | 18 | 114.55 | b1b13b14y2y3y4y5y6y7°y7y8°y8y9°y9y13°y13y17y23       | 2399.27 | 67.953  | 66061  | 3 | 800.43  | -1.22  |
| [P0A1D3]CH60_SALTY 60 kDa chaperonin   | 6  |                       | GVNVLADAVK                          | 18  | 10 | 7  | 54.79  | b2y3y4y6y8°y8y10                                     | 985.55  | 56.732  | 54145  | 2 | 493.28  | -13.87 |
| [P0A1D3]CH60_SALTY 60 kDa chaperonin   | 7  |                       | AVAAAVEELK                          | 122 | 10 | 7  | 57.98  | b2b3y5y6y7y8y10                                      | 1000.56 | 48.035  | 43277  | 2 | 500.78  | -7.02  |
| [P0A1D3]CH60_SALTY 60 kDa chaperonin   | 8  |                       | QQIEEATSDYDREK                      | 350 | 14 | 7  | 38.91  | b6°b6b8y5y7y8y14                                     | 1711.75 | 34.296  | 41651  | 3 | 571.26  | -14.98 |
| [P0A1D3]CH60_SALTY 60 kDa chaperonin   | 9  | Carbamidomethyl+C(6)  | QIVLNCGEEPSVVANTVK                  | 452 | 18 | 7  | 46.69  | b9b13y5y13y14y15y18                                  | 1957.02 | 62.420  | 39284  | 2 | 979.01  | 5.05   |
| [P0A1D3]CH60_SALTY 60 kDa chaperonin   | 10 |                       | VEDALHATR                           | 395 | 9  | 6  | 67.58  | y3y4°y4y6y7y8                                        | 1011.51 | 26.880  | 30963  | 2 | 506.26  | -9.29  |
| [P0A1D3]CH60_SALTY 60 kDa chaperonin   | 11 | Carbamidomethyl+C(6)  | ALSVPCSDSK                          | 132 | 10 | 7  | 40.02  | b3°b3y2y5y6y8y10                                     | 1063.50 | 36.061  | 29475  | 2 | 532.25  | -5.97  |
| [P0A1D3]CH60_SALTY 60 kDa chaperonin   | 12 |                       | SFGAPTITK                           | 42  | 9  | 8  | 53.14  | b2b3y1y2y3y5y7y9                                     | 921.49  | 45.654  | 28934  | 2 | 461.25  | -13.25 |
| [P0A1D3]CH60_SALTY 60 kDa chaperonin   | 13 |                       | AVAAGMNPMDLK                        | 105 | 12 | 12 | 112.81 | b2b4b8y3y5y7y8y9y10y11°y11y12                        | 1217.60 | 59.133  | 26351  | 2 | 609.30  | -3.01  |
| [P0A1D3]CH60_SALTY 60 kDa chaperonin   | 14 |                       | AIAQVGTISANSDETVGK                  | 142 | 18 | 9  | 52.67  | y2y9y10°y10y11y13°y13y14y18                          | 1760.91 | 49.183  | 25075  | 2 | 880.96  | 4.85   |
| [P0A1D3]CH60_SALTY 60 kDa chaperonin   | 15 |                       | GGDGNYGYNAAATEEYGNMIDMG ILDPTK      | 470 | 28 | 6  | 49.97  | y3y4y5y10y11y28                                      | 2966.32 | 88.462  | 12731  | 2 | 1483.66 | 11.77  |
| [P0A1D3]CH60_SALTY 60 kDa chaperonin   | 16 |                       | GQNEQNVGKIK                         | 430 | 11 | 7  | 24.23  | b2°b2b9y3y9°y9y11                                    | 1201.58 | 27.823  | 9916   | 2 | 601.29  | -0.91  |
| [P0A1D3]CH60_SALTY 60 kDa chaperonin   | 17 |                       | GYLSPYFINKPETGAVELESPFILL ADK       | 197 | 28 | 7  | 25.44  | b2b4b12y2y3y4y24                                     | 3111.65 | 102.209 | 3478   | 3 | 1037.89 | 5.65   |
| [P0A1D3]CH60_SALTY 60 kDa chaperonin   | 18 |                       | AMEAPLR                             | 445 | 7  | 8  | 40.38  | b1b2b6°b6y2y4y6°y6                                   | 787.41  | 37.550  | 3265   | 1 | 787.41  | -10.23 |
| [P0A1D3]CH60_SALTY 60 kDa chaperonin   | 19 |                       | EGVITVEDGTGLQDEL DVVEGMQ FDR        | 171 | 26 | 7  | 27.96  | b8°b8b12b14y3y10y12                                  | 2851.37 | 104.738 | 3230   | 3 | 951.13  | 12.50  |



|                                            |    |                                        |                                        |     |    |    |        |                                                  |         |         |       |   |         |        |
|--------------------------------------------|----|----------------------------------------|----------------------------------------|-----|----|----|--------|--------------------------------------------------|---------|---------|-------|---|---------|--------|
| [P0A1D3]CH60_SALTY 60 kDa chaperonin       | 20 |                                        | DTTTHIDGVGEEAAIQGR                     | 327 | 18 | 5  | 15.53  | b5b12°b12y12°y12                                 | 1845.90 | 87.685  | 2272  | 2 | 923.45  | -11.11 |
| [P0A1D3]CH60_SALTY 60 kDa chaperonin       | 21 |                                        | LAGGVAVIK                              | 371 | 9  | 3  | 30.41  | b4y7y8                                           | 827.52  | 45.742  | 54740 | 2 | 414.26  | -17.78 |
| [P0A1D3]CH60_SALTY 60 kDa chaperonin       | 22 |                                        | ATLEDLGQAK                             | 311 | 10 | 3  | 26.83  | b6b9y9                                           | 1045.55 | 44.917  | 12104 | 2 | 523.28  | -4.79  |
| [P0A1D3]CH60_SALTY 60 kDa chaperonin       | 23 |                                        | FENMGAQMVK                             | 65  | 10 | 4  | 26.83  | b3b6y7*y7                                        | 1154.54 | 36.365  | 1902  | 3 | 385.52  | 4.23   |
| [P0A1D3]CH60_SALTY 60 kDa chaperonin       | 24 |                                        | FGNDAR                                 | 7   | 6  | 1  | 13.6   | y4                                               | 679.32  | 77.189  | 1824  | 1 | 679.32  | 0.18   |
| [P0A1D3]CH60_SALTY 60 kDa chaperonin       | 25 |                                        | IADLKGQNEQNVGIK                        | 425 | 16 | 15 | 153.69 | b3b9b10b11y3y4y6y7y8y9y11*y11y14y15*y15          | 1741.88 | 40.712  | 82822 | 3 | 581.30  | -13.81 |
| [P0A1D3]CH60_SALTY 60 kDa chaperonin       | 26 | Carbamidomethyl+C(16)                  | AVAAAVEELKALSVP CSDSK                  | 122 | 20 | 6  | 38.71  | b5b8y4y6y10y18                                   | 2045.04 | 72.413  | 40366 | 3 | 682.35  | -7.34  |
| [P0A1D3]CH60_SALTY 60 kDa chaperonin       | 27 |                                        | AMLQDIATLTGGTVISEEIGMELE KATLEDLGQAK   | 286 | 35 | 18 | 118.53 | b3b4b6b8b10*b10b13y5y6y7y10y16y20y21y24y25y26y29 | 3675.89 | 122.015 | 32389 | 3 | 1225.97 | 4.91   |
| [P0A1D3]CH60_SALTY 60 kDa chaperonin       | 28 |                                        | GGDGNYGYNAAATEEYGNMIDMG ILDPTKVTR      | 470 | 31 | 3  | 17.09  | y6y16y25                                         | 3322.53 | 86.679  | 31057 | 3 | 1108.18 | 8.01   |
| [P0A1D3]CH60_SALTY 60 kDa chaperonin       | 29 | Carbamidomethyl+C(13)                  | AMEAPLRQIVLNCGEEPSVVANT VK             | 445 | 25 | 10 | 50.18  | b3b4b7b9b16y4*y4y5y12°y12                        | 2725.41 | 74.392  | 25422 | 3 | 909.14  | 2.96   |
| [P0A1D3]CH60_SALTY 60 kDa chaperonin       | 30 |                                        | AVAAGMNPMDLKR                          | 105 | 13 | 10 | 95.55  | b8b11y3y4y6y7*y7y9y10*y10                        | 1373.70 | 51.497  | 13509 | 2 | 687.35  | -0.44  |
| [P0A1D3]CH60_SALTY 60 kDa chaperonin       | 31 |                                        | LIAEAMDKV GK                           | 160 | 11 | 4  | 24.23  | b3y7y9°y9                                        | 1174.64 | 46.703  | 12085 | 2 | 587.83  | -5.09  |
| [P0A1D3]CH60_SALTY 60 kDa chaperonin       | 32 |                                        | ANDAAGDGTTTATVLAQSIITEGL KAVAAGMNPMDLK | 80  | 37 | 4  | 21.34  | b7y6y8y9                                         | 3616.83 | 131.557 | 7184  | 3 | 1206.28 | 4.19   |
| [P0A1D3]CH60_SALTY 60 kDa chaperonin       | 33 |                                        | EVASKANDAAGDGTTTATVLAQS IITEGLK        | 75  | 30 | 3  | 11.36  | b10b13y3                                         | 2932.49 | 87.543  | 6289  | 3 | 978.17  | -6.99  |
| [P0A1D3]CH60_SALTY 60 kDa chaperonin       | 34 | Carbamidomethyl+C(6)                   | ALSVP CSDSKAIAQVGTISANSDE TVGK         | 132 | 28 | 3  | 11.68  | b11y7y13                                         | 2805.38 | 59.542  | 1779  | 3 | 935.80  | -5.05  |
| [P0A1D3]CH60_SALTY 60 kDa chaperonin       | 35 | Phosphoryl STY(6)                      | SFGAPTITKDGVS VAR                      | 42  | 16 | 4  | 24.17  | b4b14y12y14                                      | 1685.83 | 74.391  | 1651  | 2 | 843.42  | 8.40   |
| [P0A1D3]CH60_SALTY 60 kDa chaperonin       | 36 | Carbamidomethyl+C(18) ;Oxidation+M(13) | SALQYAASVAGLMITTECMVTDL PK             | 501 | 25 | 3  | 12.37  | b8b11y9                                          | 2686.35 | 107.916 | 1723  | 4 | 672.34  | 15.00  |
| [P0A1D3]CH60_SALTY 60 kDa chaperonin       | 37 |                                        | DALHATR                                | 397 | 7  | 0  | 1.63   |                                                  | 783.42  | 26.832  | 65096 | 2 | 392.21  | 8.88   |
| [P0A1D3]CH60_SALTY 60 kDa chaperonin       | 38 |                                        | EDALHATR                               | 396 | 8  | 2  | 8.8    | b6°b6                                            | 912.44  | 26.877  | 25828 | 2 | 456.72  | -12.78 |
| [P0A1D3]CH60_SALTY 60 kDa chaperonin       | 39 | Carbamidomethyl+C(4)                   | SVPCSDSK                               | 134 | 8  | 0  | 2.04   |                                                  | 879.38  | 36.043  | 2127  | 1 | 879.38  | -3.19  |
| [P0A1D3]CH60_SALTY 60 kDa chaperonin       | 40 |                                        | EMLPVLEAVAK                            | 231 | 11 | 0  | 2.44   |                                                  | 1181.65 | 80.245  | 5192  | 2 | 591.33  | -3.51  |
| [P0A1D3]CH60_SALTY 60 kDa chaperonin       | 41 |                                        | QQIEEATSDYDREK                         | 350 | 14 | 0  | 3.66   |                                                  | 1694.75 | 34.280  | 1843  | 3 | 565.59  | 2.74   |
| [P66313]RL6_SALTY 50S ribosomal protein L6 | 1  |                                        | APVVVPAGVDVK                           | 6   | 12 | 13 | 127.76 | b2b3b4b5y3y5y6y7°y7y8y9y10y12                    | 1150.68 | 54.028  | 60701 | 2 | 575.84  | -6.47  |
| [P66313]RL6_SALTY 50S ribosomal protein L6 | 2  |                                        | DGYADGWAQAGTAR                         | 55  | 14 | 4  | 19.22  | b3y6y11y14                                       | 1438.64 | 50.763  | 46020 | 2 | 719.82  | 5.35   |
| [P66313]RL6_SALTY 50S ribosomal protein L6 | 3  |                                        | TLNDAVEVK                              | 35  | 9  | 10 | 54.39  | b2°b2y1y3°y3y6y7°y7y8y9                          | 988.52  | 39.174  | 43927 | 2 | 494.76  | -12.90 |
| [P66313]RL6_SALTY 50S ribosomal protein L6 | 4  |                                        | INGQVITIK                              | 18  | 9  | 4  | 30.41  | b3y7y8y9                                         | 985.59  | 49.155  | 42959 | 2 | 493.30  | -9.29  |
| [P66313]RL6_SALTY 50S ribosomal protein L6 | 5  |                                        | LQLVGVGYR                              | 86  | 9  | 7  | 38.19  | b2*b2y2y4y5y7y9                                  | 1004.58 | 60.245  | 32213 | 2 | 502.79  | -8.32  |
| [P66313]RL6_SALTY 50S ribosomal protein L6 | 6  |                                        | HADNALTFGPR                            | 44  | 11 | 8  | 47.6   | b3°b3b5y4y9*y9y10y11                             | 1198.59 | 46.925  | 20014 | 2 | 599.80  | -3.97  |

|                                                |    |                                             |                                      |     |    |    |       |                                                  |         |         |       |   |         |        |
|------------------------------------------------|----|---------------------------------------------|--------------------------------------|-----|----|----|-------|--------------------------------------------------|---------|---------|-------|---|---------|--------|
| [P66313]RL6_SALTY 50S ribosomal protein L6     | 7  |                                             | HADNALTFGPRDGYADGWAQAG TAR           | 44  | 25 | 3  | 35.16 | b10b11b12                                        | 2618.19 | 56.554  | 2418  | 3 | 873.40  | -10.26 |
| [P66313]RL6_SALTY 50S ribosomal protein L6     | 8  |                                             | ALLNSMVIGVTEGFTK                     | 69  | 16 | 6  | 44.83 | b7b15y6y8y12y13                                  | 1679.90 | 94.349  | 48182 | 2 | 840.45  | -3.34  |
| [P66313]RL6_SALTY 50S ribosomal protein L6     | 9  |                                             | RPEPYK                               | 152 | 6  | 1  | 13.6  | y4                                               | 789.43  | 39.121  | 5586  | 2 | 395.22  | 9.97   |
| [P66313]RL6_SALTY 50S ribosomal protein L6     | 10 |                                             | NGELTRTLNDAVEVK                      | 29  | 15 | 3  | 24.1  | b5y7y8                                           | 1658.85 | 38.187  | 4364  | 3 | 553.62  | -12.58 |
| [P66313]RL6_SALTY 50S ribosomal protein L6     | 11 | Phosphoryl STY(14)                          | HADNALTFGPRDGYADGWAQAG TAR           | 44  | 25 | 4  | 12.37 | b7b12y11°y11                                     | 2698.18 | 84.944  | 2842  | 4 | 675.30  | 4.98   |
| [Q8ZP20]TREA_SALTY Periplasmic trehalase       | 1  |                                             | VAAAAQAHLQPGLATTSVK                  | 428 | 21 | 13 | 78.66 | b2b3b4b5b9b11b17*b17y5y8y10y19y21                | 2004.11 | 58.463  | 85590 | 3 | 668.71  | -7.00  |
| [Q8ZP20]TREA_SALTY Periplasmic trehalase       | 2  |                                             | TTTIAPVDLNALLYQLEK                   | 335 | 18 | 19 | 85.88 | b2°b2b3°b3b4°b4b5°b5b8°b8y1y3y4°y4*y4y5y13y14y18 | 2003.12 | 103.706 | 56158 | 2 | 1002.07 | 9.38   |
| [Q8ZP20]TREA_SALTY Periplasmic trehalase       | 3  |                                             | WMDNPQQLSTIR                         | 323 | 12 | 9  | 54.33 | b2b11y2y8y9y10*y10y11y12                         | 1488.73 | 63.130  | 48527 | 2 | 744.87  | -0.33  |
| [Q8ZP20]TREA_SALTY Periplasmic trehalase       | 4  |                                             | TFADAIPNSDPLMILADYR                  | 68  | 19 | 13 | 73.05 | b5°b5b6y2y3y4°y4y5°y5y9y10y13y19                 | 2123.07 | 101.541 | 48029 | 2 | 1062.04 | 9.77   |
| [Q8ZP20]TREA_SALTY Periplasmic trehalase       | 5  |                                             | FLTNVQHTYDR                          | 486 | 11 | 5  | 24.23 | b4b7°b7y2y9                                      | 1393.67 | 44.100  | 10561 | 3 | 465.23  | -8.06  |
| [Q8ZP20]TREA_SALTY Periplasmic trehalase       | 6  |                                             | WDSLLPLPESYVVPGGR                    | 142 | 17 | 5  | 29.83 | b4b5y4y12y17                                     | 1884.99 | 91.570  | 7532  | 2 | 943.00  | 3.11   |
| [Q8ZP20]TREA_SALTY Periplasmic trehalase       | 7  |                                             | AIEMHLWNNK                           | 380 | 10 | 6  | 26.83 | b7b9y2*y2y6y10                                   | 1255.62 | 43.522  | 3493  | 2 | 628.31  | -3.89  |
| [Q8ZP20]TREA_SALTY Periplasmic trehalase       | 8  |                                             | SAAASGWDFSSR                         | 311 | 12 | 3  | 32.42 | y6y8y11                                          | 1241.57 | 54.626  | 32545 | 2 | 621.29  | 12.88  |
| [Q8ZP20]TREA_SALTY Periplasmic trehalase       | 9  |                                             | SNPNRPATEIYR                         | 296 | 12 | 8  | 29.41 | b8*b8b9°b9*b9b11°b11*b11                         | 1417.74 | 51.497  | 11196 | 2 | 709.37  | 14.03  |
| [Q8ZP20]TREA_SALTY Periplasmic trehalase       | 10 |                                             | VADMVANFGYEIDAWGHIPNGNR              | 183 | 23 | 5  | 20.05 | b8b11b13*b13y12                                  | 2546.19 | 81.289  | 4315  | 3 | 849.40  | 1.63   |
| [Q8ZP20]TREA_SALTY Periplasmic trehalase       | 11 | Carbamidomethyl+C(6); Carbamidomethyl+C(12) | MLDLICPQEKPCDSVPSTRPASLS ATPK        | 534 | 29 | 3  | 17.46 | y3y12y14                                         | 3199.59 | 64.544  | 3387  | 3 | 1067.20 | 3.36   |
| [Q8ZP20]TREA_SALTY Periplasmic trehalase       | 12 |                                             | LEDGSVLNR                            | 266 | 9  | 4  | 45.36 | b4b5b7y3                                         | 1002.51 | 24.006  | 2355  | 2 | 501.76  | -14.19 |
| [Q8ZP20]TREA_SALTY Periplasmic trehalase       | 13 |                                             | DTPRPESWVEDIATAK                     | 280 | 16 | 7  | 55.98 | b4b5b10y5y9y11y12                                | 1814.92 | 111.491 | 2283  | 2 | 907.96  | 12.71  |
| [Q8ZP20]TREA_SALTY Periplasmic trehalase       | 14 |                                             | SQPPFFAFMVELLAQHEGDDALK              | 212 | 23 | 3  | 34.85 | b7b8b9                                           | 2590.21 | 98.043  | 2253  | 4 | 648.31  | -20.45 |
| [Q8ZP20]TREA_SALTY Periplasmic trehalase       | 15 |                                             | NVEKWDSLLPLPESYVVPGGR                | 138 | 21 | 9  | 61.86 | b9b11y4y5y8y10°y10y11y12                         | 2355.24 | 88.061  | 58983 | 3 | 785.75  | 3.21   |
| [Q8ZP20]TREA_SALTY Periplasmic trehalase       | 16 | Carbamidomethyl+C(6); Carbamidomethyl+C(12) | MLDLICPQEKPCDSVPSTRPASLS ATPKTPSAATQ | 534 | 36 | 10 | 39.13 | b3b4b5b10*b10b26y10°y10y13*y13                   | 3855.88 | 64.463  | 50930 | 4 | 964.73  | -2.98  |
| [Q8ZP20]TREA_SALTY Periplasmic trehalase       | 17 |                                             | DLRSAAASGWDFSSR                      | 308 | 15 | 3  | 18.08 | b7b14y4                                          | 1625.79 | 62.266  | 8461  | 3 | 542.60  | 12.01  |
| [Q8ZP20]TREA_SALTY Periplasmic trehalase       | 18 |                                             | LVEKNDVSSTGTGGGGGEYPLQD GFGWTVNGVTLK | 500 | 34 | 4  | 22.91 | y11y12*y12y14                                    | 3440.71 | 111.095 | 3359  | 4 | 860.93  | 13.69  |
| [Q8ZP20]TREA_SALTY Periplasmic trehalase       | 19 | Phosphoryl STY(11)                          | SNPNRPATEIYRDLR                      | 296 | 15 | 5  | 43.61 | b6b7°b7b9b10                                     | 1881.88 | 60.881  | 3897  | 3 | 627.96  | -4.86  |
| [Q8ZP20]TREA_SALTY Periplasmic trehalase       | 20 | Oxidation+M(9)                              | SQPPFFAFMVELLAQHEGDDALK              | 212 | 23 | 4  | 34.85 | b6°b6b7b8                                        | 2606.27 | 136.191 | 12608 | 3 | 869.43  | 3.00   |
| [Q8ZP20]TREA_SALTY Periplasmic trehalase       | 21 | Oxidation+M(4)                              | VADMVANFGYEIDAWGHIPNGNR              | 183 | 23 | 3  | 13.01 | b11b19y4                                         | 2562.19 | 73.373  | 10406 | 3 | 854.74  | 3.81   |
| [P65882]PURA_SALTY Adenylosuccinate synthetase | 1  | Carbamidomethyl+C(7)                        | LLLSEACPLILDYHVALDNAR                | 97  | 21 | 10 | 54.11 | b2b19b20*b20y3y9y11y12y19y21                     | 2396.25 | 91.688  | 26201 | 3 | 799.42  | -4.99  |
| [P65882]PURA_SALTY Adenylosuccinate synthetase | 2  |                                             | IVDLLTER                             | 19  | 8  | 4  | 36.02 | b2b3b7y6                                         | 958.54  | 62.515  | 12037 | 2 | 479.77  | -14.96 |

|                                               |    |                       |                                   |     |    |    |        |                                                                  |         |         |        |   |         |        |
|-----------------------------------------------|----|-----------------------|-----------------------------------|-----|----|----|--------|------------------------------------------------------------------|---------|---------|--------|---|---------|--------|
| P65882 PURA_SALTY Adenylosuccinate synthetase | 3  |                       | VLDDTMAVADILTSMVVDVSDLLDQAR       | 186 | 27 | 21 | 176.28 | b2b4b5b6b7b8°b8b10b23y2y3y4y5y6y7y8°y8y9y10y11y27                | 2905.46 | 138.207 | 9784   | 3 | 969.16  | 1.09   |
| P65882 PURA_SALTY Adenylosuccinate synthetase | 4  |                       | EVTTTPLAADDWK                     | 354 | 13 | 5  | 29.57  | b7b11y4y12y13                                                    | 1446.69 | 80.356  | 5708   | 3 | 482.90  | -11.39 |
| P65882 PURA_SALTY Adenylosuccinate synthetase | 5  | Carbamidomethyl+C(11) | AVQLNSLSGFCLTK                    | 318 | 14 | 4  | 19.22  | b11y7°y7y10                                                      | 1537.79 | 74.464  | 4594   | 2 | 769.40  | -7.46  |
| P65882 PURA_SALTY Adenylosuccinate synthetase | 6  |                       | EVMEYHNFLVNYK                     | 163 | 15 | 3  | 18.08  | b5y9y11                                                          | 1976.90 | 62.216  | 2123   | 4 | 494.98  | -8.64  |
| P65882 PURA_SALTY Adenylosuccinate synthetase | 7  |                       | TETMILRDPFDA                      | 420 | 12 | 3  | 32.42  | b3b5b8                                                           | 1408.67 | 80.819  | 1938   | 3 | 470.23  | -4.59  |
| P65882 PURA_SALTY Adenylosuccinate synthetase | 8  | Carbamidomethyl+C(2)  | LCVAYR                            | 343 | 6  | 2  | 29.8   | y3y5                                                             | 781.40  | 31.592  | 21950  | 1 | 781.40  | 0.00   |
| P65882 PURA_SALTY Adenylosuccinate synthetase | 9  |                       | MGNNVVVLGTQWGDEGK                 | 0   | 17 | 3  | 24.91  | y8y9y14                                                          | 1803.83 | 76.795  | 19825  | 3 | 601.95  | -20.84 |
| P65882 PURA_SALTY Adenylosuccinate synthetase | 10 |                       | ENVTSIINGNVVLSPSALMK              | 62  | 20 | 3  | 14.32  | b4b15y14                                                         | 2029.07 | 72.885  | 3329   | 3 | 677.03  | -14.50 |
| P65882 PURA_SALTY Adenylosuccinate synthetase | 11 |                       | AEAVDYQK                          | 178 | 8  | 3  | 33.01  | b4b5y7                                                           | 923.44  | 32.944  | 1973   | 2 | 462.23  | -3.37  |
| P65882 PURA_SALTY Adenylosuccinate synthetase | 12 |                       | ENVTSIINGNVVLSPSALMKEMK           | 62  | 23 | 4  | 20.05  | b3b14b17y10                                                      | 2417.26 | 97.904  | 9081   | 2 | 1209.13 | -7.57  |
| P65882 PURA_SALTY Adenylosuccinate synthetase | 13 |                       | MGNNVVVLGTQWGDEGKGK               | 0   | 19 | 3  | 22.67  | b5b6y3                                                           | 1988.98 | 43.601  | 8132   | 4 | 498.00  | -4.23  |
| P65882 PURA_SALTY Adenylosuccinate synthetase | 14 |                       | AIGTTGRGIGPAYEDK                  | 125 | 16 | 11 | 81.8   | b4°b4y3y6y7y8°y8y9°y9y11y12                                      | 1605.82 | 69.546  | 5424   | 3 | 535.94  | -3.65  |
| P65882 PURA_SALTY Adenylosuccinate synthetase | 15 |                       | EVTTTPLAADDWKGVPIYETMPGWSESTFGVK  | 354 | 33 | 3  | 11.04  | b5y6y12                                                          | 3641.76 | 93.214  | 2797   | 3 | 1214.59 | 5.50   |
| P65882 PURA_SALTY Adenylosuccinate synthetase | 16 | Carbamidomethyl+C(2)  | LCVAYRMPDGR                       | 343 | 11 | 4  | 27.24  | b3b4y6°y6                                                        | 1337.63 | 89.844  | 1957   | 2 | 669.32  | -14.14 |
| P65882 PURA_SALTY Adenylosuccinate synthetase | 17 | Oxidation+M()         | ENVTSIINGNVVLSPSALMKEMKELEDR      | 62  | 28 | 3  | 11.68  | b9b11y10                                                         | 3075.59 | 95.312  | 6708   | 3 | 1025.87 | 5.40   |
| P65882 PURA_SALTY Adenylosuccinate synthetase | 18 | Oxidation+M(15)       | VLDDTMAVADILTSMVVDVSDLLDQAR       | 186 | 27 | 4  | 22.73  | b7b9°b9b10                                                       | 2921.44 | 122.470 | 3210   | 3 | 974.48  | -3.18  |
| P66593 RS6_SALTY 30S ribosomal protein S6     | 1  |                       | AHYVLMNVEAPQEVIDELETTFR           | 56  | 23 | 20 | 150.28 | b2b3b4b5b6b8b14y2y3y4y5°y5y6y7°y7y8y9y11y13y23                   | 2704.34 | 110.352 | 125372 | 3 | 902.12  | 2.71   |
| P66593 RS6_SALTY 30S ribosomal protein S6     | 2  |                       | YSAAITGAEGK                       | 24  | 11 | 6  | 47.42  | y2y5y6y7y9y11                                                    | 1067.53 | 34.172  | 71240  | 2 | 534.27  | -7.32  |
| P66593 RS6_SALTY 30S ribosomal protein S6     | 3  |                       | FNDAVIR                           | 79  | 7  | 8  | 63.75  | b5y1y3y4y5y6*y6y7                                                | 834.44  | 42.774  | 55809  | 2 | 417.72  | -10.61 |
| P66593 RS6_SALTY 30S ribosomal protein S6     | 4  |                       | HAVTEASPMVK                       | 93  | 11 | 3  | 35.99  | y6y7y8                                                           | 1169.59 | 31.203  | 33244  | 2 | 585.30  | -6.47  |
| P66593 RS6_SALTY 30S ribosomal protein S6     | 5  |                       | LEDWGR                            | 38  | 6  | 1  | 13.6   | y4                                                               | 775.37  | 39.086  | 6543   | 2 | 388.19  | -6.14  |
| P66593 RS6_SALTY 30S ribosomal protein S6     | 6  |                       | AHYVLMNVEAPQEVIDELETTFRFNDAVIR    | 56  | 30 | 8  | 43.38  | b3b8b9b10°b10y4y12y15                                            | 3519.75 | 115.409 | 46826  | 4 | 880.69  | -1.80  |
| P66593 RS6_SALTY 30S ribosomal protein S6     | 7  |                       | RHYEIVFMVHPDQSEQVPGMIER           | 1   | 23 | 4  | 17.42  | b7b9y10y12                                                       | 2797.35 | 96.356  | 3964   | 4 | 700.09  | -3.58  |
| P66593 RS6_SALTY 30S ribosomal protein S6     | 8  |                       | HYEIVFMVHPDQSEQVPGMIERYSAAITGAEGK | 2   | 33 | 9  | 34.58  | b3b4b8°b8y3°y3y8y12y16                                           | 3689.78 | 119.578 | 3143   | 5 | 738.76  | 1.19   |
| P66593 RS6_SALTY 30S ribosomal protein S6     | 9  |                       | YSAAITGAEGKIHR                    | 24  | 14 | 4  | 44.66  | b7b8b11b12                                                       | 1473.80 | 136.398 | 2263   | 2 | 737.40  | 12.42  |
| P66593 RS6_SALTY 30S ribosomal protein S6     | 10 | Oxidation+M(9)        | HAVTEASPMVK                       | 93  | 11 | 3  | 24.23  | b4b7y5                                                           | 1185.61 | 63.681  | 4547   | 2 | 593.31  | 12.87  |
| P67091 UF_SALTY Universal stress protein F    | 1  |                       | TILVPIDISDSELTQR                  | 3   | 16 | 24 | 149.75 | b2b3°b3b4°b4y2*y2y3y4y6*y6y7°y7y8°y8y9*y9y10y12°y12*y12y13y14y16 | 1799.98 | 82.210  | 130626 | 2 | 900.49  | 4.00   |

|                                                                  |    |                       |                                                  |     |    |    |        |                                                |         |         |        |   |         |        |
|------------------------------------------------------------------|----|-----------------------|--------------------------------------------------|-----|----|----|--------|------------------------------------------------|---------|---------|--------|---|---------|--------|
| [P67091]UF_SALTY Universal stress protein F                      | 2  | Carbamidomethyl+C(4)  | HAECSVLVVR                                       | 134 | 10 | 9  | 47.81  | b2b3°b3y1y4y6y8°y8y10                          | 1169.60 | 42.199  | 45781  | 2 | 585.30  | -6.05  |
| [P67091]UF_SALTY Universal stress protein F                      | 3  |                       | IDDAKVHFLTVPISLPYYASLG<br>LAYSALPAMDDLK          | 29  | 36 | 3  | 16.56  | y5y7y9                                         | 3936.98 | 112.761 | 2458   | 4 | 985.00  | -13.08 |
| [P67091]UF_SALTY Universal stress protein F                      | 4  |                       | MNRTLVPIDISDSELTQR                               | 0   | 19 | 3  | 22.67  | b5y7y8                                         | 2201.15 | 69.548  | 2375   | 2 | 1101.08 | -3.44  |
| [P67091]UF_SALTY Universal stress protein F                      | 5  | Carbamidomethyl+C(2)  | ECSVLVVR                                         | 136 | 8  | 1  | 8.24   | b5                                             | 961.51  | 42.156  | 4249   | 2 | 481.26  | -0.25  |
| [P0A1W6]LIVK_SALTY Leucine-ecific-binding protein                | 1  |                       | LQKENIDFVYGGYYPEMGQMLR                           | 211 | 23 | 8  | 42.3   | b9b14y6y8y9y11y13y23                           | 2814.34 | 85.037  | 47562  | 3 | 938.78  | 3.04   |
| [P0A1W6]LIVK_SALTY Leucine-ecific-binding protein                | 2  |                       | QGNANIVFFDGITAGEKDFSALIA<br>R                    | 186 | 25 | 9  | 23.03  | b2b6°b6b7°b7b14°b14y13<br>y25                  | 2654.36 | 104.468 | 47164  | 3 | 885.46  | 1.29   |
| [P0A1W6]LIVK_SALTY Leucine-ecific-binding protein                | 3  |                       | TAGLDSSQGPTAAK                                   | 139 | 14 | 12 | 100.12 | b3°b3b5y5y6y8y9°y9y10y1<br>1y12y14             | 1303.64 | 29.582  | 46534  | 2 | 652.32  | -5.62  |
| [P0A1W6]LIVK_SALTY Leucine-ecific-binding protein                | 4  |                       | QQYGEGLAR                                        | 170 | 9  | 8  | 45.36  | b7b9y5y6°y6y7y9°y9                             | 1021.50 | 33.741  | 46028  | 2 | 511.25  | -10.34 |
| [P0A1W6]LIVK_SALTY Leucine-ecific-binding protein                | 5  |                       | TQFMGPEGVGNASLSNIAGGAEE<br>GMLVTMPK              | 242 | 31 | 11 | 46.39  | b2b3b9b17y2y4y5y8y12y1<br>3y31                 | 3035.48 | 92.683  | 33211  | 3 | 1012.50 | 5.63   |
| [P0A1W6]LIVK_SALTY Leucine-ecific-binding protein                | 6  | Carbamidomethyl+C(14) | IVNDGIQYVIGHLCSSSTOPASDIY<br>EDEGLMISPGATNPFLTQR | 87  | 45 | 6  | 21.54  | b8°b8y11°y11y12y14                             | 4889.40 | 97.326  | 11323  | 3 | 1630.47 | 8.39   |
| [P0A1W6]LIVK_SALTY Leucine-ecific-binding protein                | 7  |                       | GFEFGVFQWHADGSSTVAK                              | 350 | 19 | 6  | 29.3   | b4b8b12y8y12°y12                               | 2069.98 | 83.667  | 2403   | 2 | 1035.50 | 5.78   |
| [P0A1W6]LIVK_SALTY Leucine-ecific-binding protein                | 8  |                       | YILETVKPQR                                       | 153 | 10 | 4  | 54.79  | y3y4y6y7                                       | 1246.69 | 46.001  | 63814  | 3 | 416.24  | -20.17 |
| [P0A1W6]LIVK_SALTY Leucine-ecific-binding protein                | 9  |                       | ENIDFVYGGYYPEMGQMLR                              | 214 | 20 | 4  | 19.68  | b4b9y9y11                                      | 2445.14 | 102.288 | 2732   | 3 | 815.72  | 20.77  |
| [P0A1W6]LIVK_SALTY Leucine-ecific-binding protein                | 10 |                       | DPSGPVYWITYAAVQSLATAMTR                          | 293 | 23 | 4  | 28.73  | b9b11b16b17                                    | 2498.29 | 133.863 | 2719   | 3 | 833.44  | 21.40  |
| [P0A1W6]LIVK_SALTY Leucine-ecific-binding protein                | 11 |                       | IAIIHDKQQYGEGLAR                                 | 163 | 16 | 6  | 68.85  | y6y7y8y9y10y12                                 | 1811.96 | 47.001  | 124370 | 3 | 604.66  | -11.79 |
| [P0A1W6]LIVK_SALTY Leucine-ecific-binding protein                | 12 |                       | DINAKGGIK                                        | 54  | 9  | 5  | 38.19  | b5°b5b6°b6b7                                   | 915.53  | 26.342  | 28074  | 2 | 458.27  | 1.27   |
| [P0A1W6]LIVK_SALTY Leucine-ecific-binding protein                | 13 |                       | TAGLDSSQGPTAAKYILETVKPQR                         | 139 | 24 | 3  | 22.96  | b8b12b13                                       | 2531.33 | 86.498  | 16825  | 3 | 844.45  | -5.79  |
| [P0A1W6]LIVK_SALTY Leucine-ecific-binding protein                | 14 |                       | GYQYIMRTAGLDSSQGPTAAK                            | 132 | 21 | 5  | 24.63  | b5b12b13y14°y14                                | 2215.07 | 100.162 | 7771   | 2 | 1108.04 | -4.74  |
| [P0A1W6]LIVK_SALTY Leucine-ecific-binding protein                | 15 |                       | LQKENIDFVYGGYYPEMGQMLR                           | 211 | 23 | 3  | 13.01  | b11y9y12                                       | 2814.37 | 90.023  | 6945   | 3 | 938.79  | 14.66  |
| [P0A1W6]LIVK_SALTY Leucine-ecific-binding protein                | 16 |                       | RYDQDPANK                                        | 273 | 9  | 3  | 30.41  | b3b5y4                                         | 1106.52 | 16.144  | 3975   | 2 | 553.76  | -3.53  |
| [P0A1W6]LIVK_SALTY Leucine-ecific-binding protein                | 17 |                       | GDLKGFEFGVFQWHADGSSTVA<br>K                      | 346 | 23 | 6  | 23.73  | b9b13°b13°b13b14y9                             | 2483.18 | 92.160  | 1982   | 2 | 1242.09 | -8.65  |
| [P0A1W6]LIVK_SALTY Leucine-ecific-binding protein                | 18 | Phosphoryl STY(15)    | TQFMGPEGVGNASLSNIAGGAEE<br>GMLVTMPK              | 242 | 31 | 5  | 18.7   | b7b12b14y8y16                                  | 3115.44 | 136.454 | 2529   | 2 | 1558.23 | 7.44   |
| [P0A1W6]LIVK_SALTY Leucine-ecific-binding protein                | 19 | Oxidation+M()         | LQKENIDFVYGGYYPEMGQMLR                           | 211 | 23 | 3  | 13.01  | b11b13y11                                      | 2830.35 | 69.447  | 3946   | 3 | 944.12  | 11.30  |
| [P0A1W6]LIVK_SALTY Leucine-ecific-binding protein                | 20 |                       | QQYGEGLAR                                        | 170 | 9  | 0  | 1.63   |                                                | 1003.49 | 33.781  | 2748   | 2 | 502.25  | 0.36   |
| [Q9ZF60]GLTI_SALTY Glutamate/aartate periplasmic-binding protein | 1  |                       | VVGYSQDYSNAIVEAVKK                               | 61  | 18 | 16 | 82.58  | b1b2b7b12y1y2y4y5°y5y1<br>0y12°y12y14y16y17y18 | 1970.00 | 63.818  | 169158 | 3 | 657.34  | -11.03 |
| [Q9ZF60]GLTI_SALTY Glutamate/aartate periplasmic-binding protein | 2  |                       | AVAFMMDDALLAGER                                  | 198 | 15 | 14 | 96.42  | b1b3b5y2°y2y3°y3y4y5y7y<br>10y11y12y15         | 1609.78 | 84.578  | 133629 | 2 | 805.39  | 4.17   |
| [Q9ZF60]GLTI_SALTY Glutamate/aartate periplasmic-binding protein | 3  |                       | ESSVPFSYYDNQQK                                   | 47  | 14 | 12 | 83.92  | b2b4°b4b11y4y6y7y8y9y1<br>0°y10y14             | 1691.76 | 56.276  | 130319 | 2 | 846.38  | 2.16   |

|                                                                 |    |                                           |                                  |     |    |    |        |                                             |         |        |        |   |         |        |
|-----------------------------------------------------------------|----|-------------------------------------------|----------------------------------|-----|----|----|--------|---------------------------------------------|---------|--------|--------|---|---------|--------|
| Q9ZF60 GLTI_SALTY Glutamate/aartate periplasmic-binding protein | 4  |                                           | VVGYSQDYSNAIVEAVK                | 61  | 17 | 14 | 111.19 | b2b3b8b14b16y3y4y5y11y12y13*y13y15y17       | 1841.94 | 68.362 | 117323 | 2 | 921.47  | 4.44   |
| Q9ZF60 GLTI_SALTY Glutamate/aartate periplasmic-binding protein | 5  |                                           | NGVIVVGHR                        | 38  | 9  | 3  | 38.19  | y3y5y6                                      | 950.54  | 33.183 | 62817  | 2 | 475.77  | -13.48 |
| Q9ZF60 GLTI_SALTY Glutamate/aartate periplasmic-binding protein | 6  | Carbamidomethyl+C(13)                     | IPLLQNGTFDFECGSTNNLER            | 98  | 22 | 10 | 49.12  | b3b10y2y6y8y10y11y12*y12y22                 | 2526.22 | 81.906 | 31976  | 2 | 1263.61 | 10.34  |
| Q9ZF60 GLTI_SALTY Glutamate/aartate periplasmic-binding protein | 7  |                                           | LIPITSQNR                        | 89  | 9  | 6  | 38.19  | b2y5y6y7*y7y9                               | 1041.59 | 43.604 | 29611  | 2 | 521.30  | -10.08 |
| Q9ZF60 GLTI_SALTY Glutamate/aartate periplasmic-binding protein | 8  |                                           | NGVIVVGHRESSVPFSYYDNQK           | 38  | 23 | 7  | 29.37  | b2b3y4y8y10y11y23                           | 2623.30 | 58.420 | 27640  | 3 | 875.10  | 3.72   |
| Q9ZF60 GLTI_SALTY Glutamate/aartate periplasmic-binding protein | 9  |                                           | LNKPDLQVK                        | 80  | 9  | 6  | 38.19  | y2y3y4y6*y6y9                               | 1054.61 | 38.357 | 21832  | 2 | 527.81  | -11.69 |
| Q9ZF60 GLTI_SALTY Glutamate/aartate periplasmic-binding protein | 10 |                                           | LMDDTIAQAQTSGEAEK                | 247 | 17 | 6  | 36.85  | b2b3*b3y6y7y8                               | 1807.83 | 75.812 | 12359  | 3 | 603.28  | -2.36  |
| Q9ZF60 GLTI_SALTY Glutamate/aartate periplasmic-binding protein | 11 | Carbamidomethyl+C(19)                     | KPDNWEIVGKPKSQEAYGCMLR           | 217 | 22 | 6  | 37.96  | b5*b5b6b7b12y5                              | 2606.23 | 76.573 | 6274   | 5 | 522.05  | -7.12  |
| Q9ZF60 GLTI_SALTY Glutamate/aartate periplasmic-binding protein | 12 |                                           | LTTAMLVMGLSAGLAHAEDGAP AAGSTLDK  | 5   | 30 | 4  | 21.91  | b10y8y9y16                                  | 2869.45 | 67.847 | 5885   | 3 | 957.16  | 2.64   |
| Q9ZF60 GLTI_SALTY Glutamate/aartate periplasmic-binding protein | 13 | Carbamidomethyl+C(22)                     | LIPITSQNRIPLLQNGTFDFECGSTNNLER   | 89  | 31 | 16 | 130.53 | b3y4*y4y6*y6y7y8y9y10y11y12y13y14*y14y21y27 | 3548.80 | 86.887 | 273430 | 3 | 1183.60 | 4.88   |
| Q9ZF60 GLTI_SALTY Glutamate/aartate periplasmic-binding protein | 14 |                                           | LMDDTIAQAQTSGEAEKWFDK            | 247 | 21 | 5  | 29.94  | y3*y3y4y8y13                                | 2384.09 | 88.868 | 50493  | 4 | 596.78  | -8.81  |
| Q9ZF60 GLTI_SALTY Glutamate/aartate periplasmic-binding protein | 15 |                                           | KLTTAMLVMGLSAGLAHAEDGA PAAGSTLDK | 4   | 31 | 4  | 24.59  | b5b10y14y15                                 | 2997.50 | 85.735 | 18873  | 3 | 999.84  | -13.68 |
| Q9ZF60 GLTI_SALTY Glutamate/aartate periplasmic-binding protein | 16 |                                           | VVGYSQDYSNAIVEAVKK               | 61  | 18 | 3  | 22.69  | b5b14b16                                    | 1970.04 | 93.809 | 12924  | 2 | 985.52  | 8.12   |
| Q9ZF60 GLTI_SALTY Glutamate/aartate periplasmic-binding protein | 17 |                                           | TLESGRAVAFMMDDALLAGER            | 192 | 21 | 4  | 13.83  | b5*b5b7y13                                  | 2253.09 | 73.260 | 2675   | 4 | 564.03  | -5.42  |
| Q9ZF60 GLTI_SALTY Glutamate/aartate periplasmic-binding protein | 18 | Carbamidomethyl+C(19)<br>;Oxidation+M(20) | KPDNWEIVGKPKSQEAYGCMLR           | 217 | 22 | 4  | 23.27  | b3b4*b4b8                                   | 2622.26 | 74.422 | 7362   | 4 | 656.32  | 7.54   |
| Q9ZF60 GLTI_SALTY Glutamate/aartate periplasmic-binding protein | 19 |                                           | NKPDLQVK                         | 81  | 8  | 0  | 1.63   |                                             | 941.54  | 38.329 | 19577  | 2 | 471.27  | -3.05  |
| Q9ZF60 GLTI_SALTY Glutamate/aartate periplasmic-binding protein | 20 |                                           | PITSQNR                          | 91  | 7  | 2  | 8.8    | b5*b5                                       | 815.43  | 43.602 | 11998  | 2 | 408.22  | -13.62 |
| Q9ZF60 GLTI_SALTY Glutamate/aartate periplasmic-binding protein | 21 |                                           | KPDNWEIVGKPKS                    | 217 | 13 | 1  | 7.8    | y5                                          | 1497.76 | 76.586 | 9718   | 2 | 749.38  | -8.64  |
| P0A1V4 KAD_SALTY Adenylate kinase                               | 1  |                                           | YGIPQISTGDMLR                    | 23  | 13 | 9  | 54.4   | b2b3b6y5y7y8y10y13*y13                      | 1450.74 | 73.138 | 37723  | 2 | 725.87  | -0.42  |
| P0A1V4 KAD_SALTY Adenylate kinase                               | 2  |                                           | LVEYHQMTAPLIGYYQK                | 167 | 17 | 14 | 56.67  | b2b3b7*b7b9*b9b11y1y2*y2y5y6y8y17           | 2054.03 | 69.633 | 37529  | 3 | 685.35  | -7.25  |

|                                   |    |                      |                                          |     |    |    |        |                                                        |         |         |        |   |         |        |
|-----------------------------------|----|----------------------|------------------------------------------|-----|----|----|--------|--------------------------------------------------------|---------|---------|--------|---|---------|--------|
| P0A1V4 KAD_SALTY Adenylate kinase | 3  |                      | NGFLLDGFPR                               | 78  | 10 | 7  | 55.43  | b3b9b10y4y5y6y10                                       | 1135.58 | 80.874  | 26456  | 2 | 568.30  | -5.05  |
| P0A1V4 KAD_SALTY Adenylate kinase | 4  |                      | IILLGAPGAGK                              | 2   | 11 | 7  | 47.42  | b1b2y5y6y7y9y11                                        | 1009.63 | 61.788  | 21446  | 2 | 505.32  | -11.12 |
| P0A1V4 KAD_SALTY Adenylate kinase | 5  |                      | LVEYHQMTAPLIGYYQKEAEGN<br>TK             | 167 | 25 | 6  | 22.64  | b5b7b13y6*y6y11                                        | 2854.38 | 97.366  | 7622   | 3 | 952.13  | -10.78 |
| P0A1V4 KAD_SALTY Adenylate kinase | 6  |                      | VDGTQAVADVR                              | 195 | 11 | 9  | 24.23  | b1b5*b5b11y2y4y10*y10y1<br>1                           | 1130.57 | 60.912  | 6905   | 1 | 1130.57 | -11.12 |
| P0A1V4 KAD_SALTY Adenylate kinase | 7  |                      | FNPPK                                    | 136 | 5  | 2  | 26.38  | b3y4                                                   | 602.32  | 56.564  | 42469  | 1 | 602.32  | -11.75 |
| P0A1V4 KAD_SALTY Adenylate kinase | 8  |                      | IILLGAPGAGKGTQAQFIMEK                    | 2   | 21 | 9  | 68.99  | b3y3y5y9y15y17y18*y18y<br>19                           | 2143.18 | 73.082  | 27047  | 3 | 715.07  | -6.27  |
| P0A1V4 KAD_SALTY Adenylate kinase | 9  | Carbamidomethyl+C(6) | IAQEDCRNGFLLDGFPR                        | 71  | 17 | 5  | 16.26  | b4*b4b10y5*y5                                          | 2007.98 | 89.112  | 23208  | 2 | 1004.49 | 4.26   |
| P0A1V4 KAD_SALTY Adenylate kinase | 10 |                      | DIMDAGKLVTDDELVIALVK                     | 50  | 19 | 4  | 28.4   | b9b12y4y5                                              | 2043.13 | 116.171 | 20464  | 3 | 681.71  | -5.97  |
| P0A1V4 KAD_SALTY Adenylate kinase | 11 |                      | QAKDIMDAGK                               | 47  | 10 | 4  | 26.83  | b4b9y9*y9                                              | 1076.54 | 70.521  | 4731   | 2 | 538.77  | 0.00   |
| P0A1V4 KAD_SALTY Adenylate kinase | 12 |                      | NGFLLDGFPRTIPQADAMK                      | 78  | 19 | 6  | 14.89  | b6*b6*b6b8*b8y9                                        | 2091.05 | 58.474  | 2701   | 3 | 697.69  | -8.06  |
| P0A1V4 KAD_SALTY Adenylate kinase | 13 |                      | VEGKDDVTGEDLTTR                          | 141 | 15 | 8  | 66.07  | b7*b7b11b12b13b14y8y11                                 | 1634.79 | 71.905  | 2211   | 3 | 545.60  | -0.90  |
| P0A1V4 KAD_SALTY Adenylate kinase | 14 | Oxidation+M(7)       | LVEYHQMTAPLIGYYQK                        | 167 | 17 | 3  | 16.26  | b9y3y6                                                 | 2070.05 | 70.859  | 2149   | 3 | 690.69  | 6.37   |
| P0A1V4 KAD_SALTY Adenylate kinase | 15 | Oxidation+M(6)       | QAKDIMDAGK                               | 47  | 10 | 3  | 26.83  | b6b8y3                                                 | 1092.54 | 32.904  | 1502   | 2 | 546.77  | 0.67   |
| P0A1V4 KAD_SALTY Adenylate kinase | 16 |                      | LVEYHQMTAPLIG                            | 167 | 13 | 0  | 4.88   |                                                        | 1471.76 | 69.685  | 1652   | 2 | 736.38  | -3.48  |
| P26982 DEGP_SALTY Protease do     | 1  |                      | AGDVITSLNGKPISSFAALR                     | 332 | 20 | 8  | 60.33  | b3b4y4y7y9y12y15y20                                    | 2017.09 | 75.195  | 101983 | 3 | 673.03  | -11.20 |
| P26982 DEGP_SALTY Protease do     | 2  |                      | SDIALIQIQNPK                             | 160 | 12 | 12 | 110.77 | b3b4*b4b5b6y2y3y5y6y7y<br>9y12                         | 1339.75 | 64.660  | 68496  | 2 | 670.38  | -4.28  |
| P26982 DEGP_SALTY Protease do     | 3  |                      | GYVVTNNHVVDNASVIK                        | 124 | 17 | 11 | 63.2   | b2b3y1y2y7y8y10y12y14y<br>15y17                        | 1828.94 | 50.803  | 55903  | 3 | 610.32  | -9.54  |
| P26982 DEGP_SALTY Protease do     | 4  |                      | NLTSQMVEYGQVK                            | 275 | 13 | 17 | 84.97  | b1b2b6b8*b8b11*b11y6*y<br>6y7*y7y8y9y11*y11y13*y1<br>3 | 1496.75 | 58.454  | 48566  | 2 | 748.88  | 3.34   |
| P26982 DEGP_SALTY Protease do     | 5  |                      | GAFVSQVMPNSSAAK                          | 313 | 15 | 13 | 92.29  | b3b4b5b8b11b13y2y8y10°<br>y10y11*y11y15                | 1493.74 | 54.008  | 39748  | 2 | 747.38  | 1.47   |
| P26982 DEGP_SALTY Protease do     | 6  |                      | VGDYTVAINPPFGLGETVTSGIVS<br>ALGR         | 186 | 28 | 19 | 92.87  | b2b3b5*b5b6*b6b7b8*b8b1<br>4y1y2y4y5y6y8y10y14y28      | 2750.44 | 116.470 | 35313  | 3 | 917.48  | 1.51   |
| P26982 DEGP_SALTY Protease do     | 7  |                      | AQVGTMPVGSK                              | 352 | 11 | 8  | 68.39  | b2*b2y3y5y6y8y9y11                                     | 1074.55 | 35.544  | 30398  | 2 | 537.78  | -7.27  |
| P26982 DEGP_SALTY Protease do     | 8  |                      | SGLNVENYENFIQTDAAINR                     | 214 | 20 | 9  | 30.53  | b2b7*b7b11y1y5y11y12*y12<br>y20                        | 2268.11 | 77.849  | 22003  | 2 | 1134.56 | 8.50   |
| P26982 DEGP_SALTY Protease do     | 9  |                      | LADSDALR                                 | 178 | 8  | 5  | 53.98  | y3y5y6y7y8                                             | 860.44  | 33.023  | 18289  | 2 | 430.72  | -11.99 |
| P26982 DEGP_SALTY Protease do     | 10 |                      | GDSSIYLLMQ                               | 465 | 10 | 4  | 26.83  | b7y2y3y9                                               | 1126.54 | 99.825  | 1785   | 1 | 1126.54 | -0.11  |
| P26982 DEGP_SALTY Protease do     | 11 |                      | FMALGSGVIIDAAK                           | 110 | 14 | 3  | 19.22  | b3y4y10                                                | 1392.75 | 76.649  | 39446  | 2 | 696.88  | -6.84  |
| P26982 DEGP_SALTY Protease do     | 12 |                      | ISLGLLR                                  | 363 | 7  | 4  | 50.56  | b4y4y5y6                                               | 771.50  | 69.016  | 26186  | 2 | 386.25  | -15.74 |
| P26982 DEGP_SALTY Protease do     | 13 |                      | ANSPAAQIGLK                              | 418 | 11 | 5  | 35.99  | b5b6*b6b7*b7                                           | 1069.62 | 33.000  | 19703  | 3 | 357.21  | 14.38  |
| P26982 DEGP_SALTY Protease do     | 14 |                      | NIAELR                                   | 443 | 6  | 1  | 13.6   | b5                                                     | 715.41  | 34.329  | 2882   | 2 | 358.21  | -5.63  |
| P26982 DEGP_SALTY Protease do     | 15 |                      | RGELGIMGTELNSELAK                        | 288 | 17 | 12 | 99.46  | b4b5b6b8b9b10b13°b13y1<br>0*y10y11y16                  | 1817.93 | 69.496  | 57722  | 3 | 606.65  | -8.26  |
| P26982 DEGP_SALTY Protease do     | 16 |                      | LADSDALRVGDYTVAINPPFGLG<br>ETVTSGIVSALGR | 178 | 36 | 7  | 36.59  | b3b5b8*b8b13b14b25                                     | 3591.83 | 99.781  | 35325  | 3 | 1197.95 | -10.60 |
| P26982 DEGP_SALTY Protease do     | 17 |                      | VDAQRGAFVSQVMPNSSAAK                     | 308 | 20 | 4  | 22.45  | b5b6*b6y8                                              | 2063.02 | 48.906  | 7463   | 4 | 516.51  | -5.21  |
| P26982 DEGP_SALTY Protease do     | 18 | Phosphoryl STY(14)   | GYVVTNNHVVDNASVIK                        | 124 | 17 | 5  | 36.85  | b12y3y4*y4y5                                           | 1908.90 | 40.789  | 29622  | 3 | 636.97  | -6.14  |
| P26982 DEGP_SALTY Protease do     | 19 | Phosphoryl STY(5)    | AQVGTMPVGSK                              | 352 | 11 | 4  | 35.2   | b3b9_H3PO4 b9y6y9                                      | 1154.52 | 42.147  | 2464   | 3 | 385.51  | 0.42   |

|                                                           |    |                |                            |     |    |    |        |                                                  |         |         |        |   |        |        |
|-----------------------------------------------------------|----|----------------|----------------------------|-----|----|----|--------|--------------------------------------------------|---------|---------|--------|---|--------|--------|
| P26982 DEGP_SALTY Protease do                             | 20 |                | NLTSQMVEYGQV               | 275 | 12 | 6  | 41.24  | y5y6°y6y9°y9y11                                  | 1368.64 | 58.485  | 292053 | 2 | 684.82 | -2.76  |
| P26982 DEGP_SALTY Protease do                             | 21 |                | VVTNNHVVDNASVIK            | 126 | 15 | 3  | 23.66  | b4b6b11                                          | 1608.86 | 50.740  | 3355   | 2 | 804.93 | -7.21  |
| P26982 DEGP_SALTY Protease do                             | 22 |                | GAFVSQVMPNSSAAK            | 313 | 15 | 1  | 7.26   | y4                                               | 1476.71 | 54.057  | 3293   | 2 | 738.86 | -0.25  |
| P0A2A3 RL1_SALTY 50S ribosomal protein L1                 | 1  |                | VVGQLGQVLGPR               | 122 | 12 | 9  | 49.56  | b2b4y2y3y7y8y10*y10y12                           | 1222.72 | 59.811  | 119127 | 2 | 611.86 | -7.79  |
| P0A2A3 RL1_SALTY 50S ribosomal protein L1                 | 2  |                | VAVFTQGPNAEAAK             | 74  | 14 | 11 | 66.27  | b11*b11y7y8*y8y9*y9y10y11°y11y14                 | 1402.73 | 45.978  | 92544  | 2 | 701.87 | -2.35  |
| P0A2A3 RL1_SALTY 50S ribosomal protein L1                 | 3  |                | VGTVTPNVAEAVK              | 141 | 13 | 17 | 105.73 | b2b3°b3b7°b7y3y7y8*y8y9y10y11y12*y12*y12y13*y13  | 1284.72 | 48.837  | 82801  | 2 | 642.86 | 0.00   |
| P0A2A3 RL1_SALTY 50S ribosomal protein L1                 | 4  |                | GATVLPHGTR                 | 60  | 11 | 7  | 50.43  | y2y4y5y6°y6y7y11                                 | 1065.57 | 30.262  | 13727  | 2 | 533.29 | -10.88 |
| P0A2A3 RL1_SALTY 50S ribosomal protein L1                 | 5  |                | AAGAELVGMEDLADQIK          | 88  | 17 | 5  | 22.84  | b10b15y7y16y17                                   | 1730.88 | 65.301  | 3063   | 3 | 577.63 | 9.24   |
| P0A2A3 RL1_SALTY 50S ribosomal protein L1                 | 6  |                | FNESVDVAVNLGIDAR           | 37  | 16 | 5  | 17.1   | b5°b5b12y5°y5                                    | 1718.88 | 77.271  | 5412   | 3 | 573.63 | 3.34   |
| P0A2A3 RL1_SALTY 50S ribosomal protein L1                 | 7  |                | SDQNVR                     | 54  | 6  | 2  | 26.79  | b4y5                                             | 718.35  | 49.295  | 4365   | 1 | 718.35 | 2.46   |
| P0A2A3 RL1_SALTY 50S ribosomal protein L1                 | 8  |                | VSISTTMGAGVAVDQAGLSASAN    | 211 | 23 | 5  | 20.05  | b7y3°y3y7y11                                     | 2107.04 | 86.181  | 2373   | 3 | 703.02 | 3.59   |
| P0A2A3 RL1_SALTY 50S ribosomal protein L1                 | 9  |                | KGEMNFDVVIASPDAMR          | 105 | 17 | 5  | 29.83  | b9°b9b10y5y8                                     | 1879.91 | 108.092 | 7767   | 2 | 940.46 | 4.09   |
| P0A2A3 RL1_SALTY 50S ribosomal protein L1                 | 10 |                | NDKNGIIHTTIGK              | 164 | 13 | 4  | 28.05  | b4°b4b10b11                                      | 1410.77 | 108.733 | 7631   | 2 | 705.89 | 0.87   |
| P0A2A3 RL1_SALTY 50S ribosomal protein L1                 | 11 |                | KVSISTTMGAGVAVDQAGLSASAN   | 210 | 24 | 7  | 60.73  | y3y7y8y9y14y15y18                                | 2235.14 | 74.364  | 5731   | 4 | 559.54 | 5.90   |
| P0A2A3 RL1_SALTY 50S ribosomal protein L1                 | 12 |                | SDQNVRGATVLPHGTR           | 54  | 17 | 3  | 16.26  | b7b12y5                                          | 1764.91 | 60.362  | 2624   | 2 | 882.96 | -1.18  |
| P0A2A3 RL1_SALTY 50S ribosomal protein L1                 | 13 | Oxidation+M(7) | VSISTTMGAGVAVDQAGLSASAN    | 211 | 23 | 5  | 17.42  | b14b18y4°y4y11                                   | 2123.06 | 75.112  | 13648  | 3 | 708.36 | 13.91  |
| P0A2A3 RL1_SALTY 50S ribosomal protein L1                 | 14 | Oxidation+M(9) | AAGAELVGMEDLADQIK          | 88  | 17 | 3  | 16.26  | b3b5y4                                           | 1746.85 | 63.742  | 9756   | 3 | 582.95 | -5.87  |
| P0A2A3 RL1_SALTY 50S ribosomal protein L1                 | 15 |                | GATVLPHGTR                 | 60  | 11 | 0  | 2.44   |                                                  | 1047.55 | 30.238  | 5808   | 3 | 349.86 | -9.32  |
| Q7CQV9 DPS_SALTY DNA protection during starvation protein | 1  |                | GANFIHAVHEMLDGFR           | 55  | 15 | 6  | 39.81  | b4y3y4°y4y6y9                                    | 1676.80 | 82.565  | 26260  | 3 | 559.60 | -14.49 |
| Q7CQV9 DPS_SALTY DNA protection during starvation protein | 2  |                | AVQLGGVALGTTQVINSK         | 83  | 18 | 11 | 85.59  | b2b3b7y3y4y9y10y11y13y14y18                      | 1756.01 | 67.986  | 25242  | 2 | 878.51 | 5.28   |
| Q7CQV9 DPS_SALTY DNA protection during starvation protein | 3  |                | AIGEAKDEDTADIFTAASR        | 134 | 19 | 6  | 44.13  | b12y4y5y7y10y13                                  | 1980.92 | 59.068  | 23088  | 3 | 660.98 | -14.42 |
| Q7CQV9 DPS_SALTY DNA protection during starvation protein | 4  |                | ASNLLYTR                   | 10  | 8  | 5  | 49.21  | b3y3y4y5y8                                       | 937.50  | 44.954  | 20067  | 2 | 469.25 | -11.00 |
| Q7CQV9 DPS_SALTY DNA protection during starvation protein | 5  |                | TALTDHLDTMAER              | 70  | 13 | 3  | 20.57  | b9b11y8                                          | 1473.68 | 53.066  | 39388  | 3 | 491.90 | -13.17 |
| Q7CQV9 DPS_SALTY DNA protection during starvation protein | 6  |                | ELADR                      | 119 | 5  | 1  | 13.19  | b3                                               | 603.31  | 43.622  | 3722   | 1 | 603.31 | 1.32   |
| Q7CQV9 DPS_SALTY DNA protection during starvation protein | 7  |                | ASNLLYTRNDVSESDK           | 10  | 16 | 6  | 48.97  | y4°y4y5y7y10y14                                  | 1811.89 | 89.886  | 22722  | 3 | 604.64 | 7.95   |
| Q7CQV9 DPS_SALTY DNA protection during starvation protein | 8  |                | DLDKFLWFIESNIE             | 153 | 14 | 3  | 19.22  | b10b12y12                                        | 1768.88 | 100.633 | 4286   | 2 | 884.95 | 3.11   |
| Q56073 DNAK_SALTY Chaperone protein dnaK                  | 1  |                | IINEPTAAALAYGLDKEVGNR      | 167 | 21 | 19 | 112.95 | b2b4*b4b6b7y1y5y6*y6y7°y7y9*y9y10y11y12y17y19y21 | 2215.16 | 75.345  | 44973  | 3 | 739.06 | -4.96  |
| Q56073 DNAK_SALTY Chaperone protein dnaK                  | 2  |                | SLGQFNLDGINPAPR            | 452 | 15 | 8  | 25.7   | b3b11°b11*b11y4y10*y10y15                        | 1598.83 | 72.413  | 19066  | 2 | 799.92 | 3.36   |
| Q56073 DNAK_SALTY Chaperone protein dnaK                  | 3  |                | TAEDYLGEVPTEAVITVPAYFNDAQR | 125 | 26 | 7  | 26.42  | b1b16y7°y7y9y11y23                               | 2869.41 | 93.617  | 17924  | 3 | 957.14 | 6.81   |
| Q56073 DNAK_SALTY Chaperone protein dnaK                  | 4  |                | ASSGLNEEEIQK               | 502 | 12 | 6  | 29.41  | b1y2y7y9y10y12                                   | 1304.62 | 35.490  | 12446  | 2 | 652.82 | -7.02  |

|                                                |    |                       |                                         |     |    |    |       |                                 |         |         |       |   |         |        |
|------------------------------------------------|----|-----------------------|-----------------------------------------|-----|----|----|-------|---------------------------------|---------|---------|-------|---|---------|--------|
| Q56073 DNAK_SALTY Chaperone protein dnaK       | 5  |                       | TAIESALNALETALK                         | 562 | 15 | 3  | 18.08 | b6b9y5                          | 1544.85 | 67.957  | 6116  | 2 | 772.93  | -5.22  |
| Q56073 DNAK_SALTY Chaperone protein dnaK       | 6  |                       | MAPPQISAEVLK                            | 109 | 12 | 4  | 35.43 | b5b6*b6b7                       | 1283.70 | 82.698  | 3756  | 2 | 642.35  | -4.85  |
| Q56073 DNAK_SALTY Chaperone protein dnaK       | 7  |                       | LMEIAQQQHAQQAGSADASANNAK                | 597 | 25 | 5  | 21.91 | b12°b12y12y13°y13               | 2610.26 | 67.096  | 2099  | 3 | 870.76  | 11.69  |
| Q56073 DNAK_SALTY Chaperone protein dnaK       | 8  |                       | EVGNR                                   | 183 | 5  | 2  | 13.19 | y4*y4                           | 574.29  | 42.195  | 12084 | 1 | 574.29  | -14.56 |
| Q56073 DNAK_SALTY Chaperone protein dnaK       | 9  |                       | IIGADNGDAWLDDVK                         | 92  | 14 | 3  | 19.22 | b6b13y11                        | 1486.73 | 67.754  | 3125  | 2 | 743.87  | -15.68 |
| Q56073 DNAK_SALTY Chaperone protein dnaK       | 10 |                       | DVNPDEAVAIGAAVQGGVLTGDVK                | 363 | 24 | 7  | 16.8  | b11°b11b13°b13y4°y4y13          | 2295.21 | 79.549  | 2862  | 3 | 765.74  | 12.66  |
| Q56073 DNAK_SALTY Chaperone protein dnaK       | 11 |                       | MPMVQK                                  | 345 | 6  | 1  | 13.6  | b4                              | 733.37  | 32.312  | 1907  | 1 | 733.37  | -8.07  |
| Q56073 DNAK_SALTY Chaperone protein dnaK       | 12 |                       | IELSSAQQTDVNLPLYTADATGPK                | 270 | 24 | 7  | 42.07 | b5°b5b7b12b13y10y11             | 2532.29 | 108.847 | 1749  | 3 | 844.77  | 3.86   |
| Q56073 DNAK_SALTY Chaperone protein dnaK       | 13 |                       | GMPQIEVTFDIDADGILHVS AK                 | 467 | 22 | 4  | 19.91 | b10°b10b13b21                   | 2356.16 | 57.319  | 1706  | 3 | 786.06  | -11.50 |
| Q56073 DNAK_SALTY Chaperone protein dnaK       | 14 | Carbamidomethyl+C(12) | IIGIDLTNTNSCVAIMDGTQAR                  | 3   | 22 | 5  | 22.14 | b15°b15y13°y13y14               | 2306.18 | 79.440  | 1614  | 2 | 1153.59 | 14.72  |
| Q56073 DNAK_SALTY Chaperone protein dnaK       | 15 |                       | AKIELSSAQQTDVNLPLYTADATGPK              | 268 | 26 | 6  | 41.4  | y7y9°y9y10y11y13                | 2731.40 | 98.813  | 38212 | 3 | 911.14  | -4.47  |
| Q56073 DNAK_SALTY Chaperone protein dnaK       | 16 |                       | MQELAQVSQKLMEIAQQQHAQQQAGSADASANNAK     | 587 | 35 | 4  | 24.26 | b3b4y4y9                        | 3752.86 | 67.458  | 34662 | 5 | 751.38  | 14.70  |
| Q56073 DNAK_SALTY Chaperone protein dnaK       | 17 |                       | IELSSAQQTDVNLPLYTADATGPKH MN IK         | 270 | 29 | 3  | 11.5  | b12b20y11                       | 3155.58 | 88.024  | 23437 | 4 | 789.65  | -6.50  |
| Q56073 DNAK_SALTY Chaperone protein dnaK       | 18 |                       | DVSIMPYKIIGADNGDAWLDDVK                 | 84  | 22 | 4  | 13.39 | b15°b15y8y11                    | 2420.25 | 104.533 | 9630  | 4 | 605.82  | 12.41  |
| Q56073 DNAK_SALTY Chaperone protein dnaK       | 19 |                       | TAEDYLGEPVTEAVITVPAYFNDAQRQATK          | 125 | 30 | 3  | 11.36 | b10b13y8                        | 3297.64 | 98.797  | 8292  | 3 | 1099.89 | 4.81   |
| Q56073 DNAK_SALTY Chaperone protein dnaK       | 20 |                       | KTAEDYLGEPVTEAVITVPAYFNDAQR             | 124 | 27 | 5  | 36.37 | b6b7°b7b8b13                    | 2997.52 | 89.059  | 5688  | 3 | 999.84  | 11.73  |
| Q56073 DNAK_SALTY Chaperone protein dnaK       | 21 |                       | IIGADNGDAWLDDVKGQK                      | 92  | 17 | 3  | 16.26 | b3b9y3                          | 1799.91 | 60.972  | 3019  | 3 | 600.64  | -8.41  |
| Q56073 DNAK_SALTY Chaperone protein dnaK       | 22 |                       | DQGIDLRNDPLAMQR                         | 246 | 15 | 3  | 18.08 | b5b8y3                          | 1741.85 | 48.275  | 2756  | 2 | 871.43  | -5.89  |
| Q56073 DNAK_SALTY Chaperone protein dnaK       | 23 | Phosphoryl STY(17)    | IELSSAQQTDVNLPLYTADATGPK                | 270 | 24 | 6  | 23.51 | b7°b7b10y7y9y12                 | 2612.24 | 97.910  | 57497 | 4 | 653.81  | -1.59  |
| Q56073 DNAK_SALTY Chaperone protein dnaK       | 24 | Oxidation+M(2)        | LMEIAQQQHAQQQAGSADASANNAKDDDVDAEFEEVKDK | 597 | 40 | 4  | 10.88 | b9°b9b12y14                     | 4359.94 | 103.558 | 2973  | 6 | 727.50  | -11.09 |
| Q8ZPD6 YNCE_SALTY Uncharacterized protein yncE | 1  |                       | TFDTPPTYPNLSALSADGK                     | 308 | 18 | 11 | 59.68 | b2b3b4b7b13y2y6y7y11y14y18      | 1897.93 | 66.281  | 27911 | 2 | 949.47  | 4.89   |
| Q8ZPD6 YNCE_SALTY Uncharacterized protein yncE | 2  |                       | QAGQVSVIDAK                             | 291 | 11 | 10 | 65.38 | b11y2y3y4°y4y7y8y9°y9y11        | 1115.60 | 38.345  | 16704 | 2 | 558.30  | -6.35  |
| Q8ZPD6 YNCE_SALTY Uncharacterized protein yncE | 3  |                       | EQEATQPDDVIR                            | 338 | 12 | 12 | 60.35 | b1b3°b3b12°b12y2y3y6°y6y8y10y12 | 1400.67 | 40.261  | 14539 | 2 | 700.84  | 0.78   |
| Q8ZPD6 YNCE_SALTY Uncharacterized protein yncE | 4  |                       | LLDDGKEHFFINLSLDTAGHR                   | 223 | 21 | 5  | 18.85 | b5°b5b7y6y9                     | 2398.19 | 66.028  | 11622 | 3 | 800.07  | -9.87  |
| Q8ZPD6 YNCE_SALTY Uncharacterized protein yncE | 5  |                       | ELVADAATNTIYISGVGKESAIWVVDGETIK         | 144 | 31 | 8  | 25.13 | b7°b7b10b11b14°b14y7°y7         | 3249.73 | 104.328 | 3125  | 3 | 1083.92 | 13.30  |
| Q8ZPD6 YNCE_SALTY Uncharacterized protein yncE | 6  |                       | EHFFINLSLDTAGHR                         | 229 | 15 | 6  | 18.08 | b7°b7y11°y11y13°y13             | 1756.90 | 95.935  | 7779  | 2 | 878.96  | 15.36  |
| Q8ZPD6 YNCE_SALTY Uncharacterized protein yncE | 7  |                       | ESAIWVVDGETIK                           | 162 | 13 | 4  | 20.57 | b12y6y9°y9                      | 1446.74 | 71.797  | 7755  | 2 | 723.88  | -1.77  |
| Q8ZPD6 YNCE_SALTY Uncharacterized protein yncE | 8  |                       | IAAPASLAVLFNPTR                         | 268 | 15 | 4  | 24.1  | b3y4°y4y5                       | 1540.87 | 89.944  | 4744  | 2 | 770.94  | -6.42  |
| Q8ZPD6 YNCE_SALTY Uncharacterized protein yncE | 9  |                       | TGDVK                                   | 119 | 5  | 1  | 13.19 | b3                              | 519.27  | 65.668  | 2339  | 1 | 519.27  | -13.05 |



|                                                |    |                       |                                                     |     |    |    |        |                                                         |         |         |       |   |         |        |
|------------------------------------------------|----|-----------------------|-----------------------------------------------------|-----|----|----|--------|---------------------------------------------------------|---------|---------|-------|---|---------|--------|
| Q8ZPD6 YNCE_SALTY Uncharacterized protein yncE | 10 |                       | AFITDSK                                             | 244 | 7  | 4  | 40.38  | b6°b6y3y5                                               | 781.40  | 35.384  | 2296  | 1 | 781.40  | -7.73  |
| Q8ZPD6 YNCE_SALTY Uncharacterized protein yncE | 11 |                       | ELVADAATNTIYISGVGK                                  | 144 | 18 | 5  | 15.53  | b5b12°b12y14°y14                                        | 1821.98 | 67.901  | 1714  | 2 | 911.49  | 9.11   |
| Q8ZPD6 YNCE_SALTY Uncharacterized protein yncE | 12 |                       | MSTGLALDSKAQR                                       | 185 | 13 | 4  | 20.57  | b4b7°b7y6                                               | 1377.72 | 45.541  | 12951 | 2 | 689.37  | 6.03   |
| Q8ZPD6 YNCE_SALTY Uncharacterized protein yncE | 13 |                       | AQRLYTTNADGEFITIDTASNK                              | 195 | 22 | 6  | 20.79  | b5b10°b10b12°b12y4                                      | 2429.23 | 93.743  | 3867  | 2 | 1215.12 | 14.27  |
| Q8ZPD6 YNCE_SALTY Uncharacterized protein yncE | 14 | Phosphoryl STY(14)    | LLDDGKEHFFINLSLDTAGHR                               | 223 | 21 | 5  | 24.63  | b5b11b12y6°y6                                           | 2478.16 | 92.183  | 9435  | 3 | 826.72  | -5.42  |
| Q8ZPD6 YNCE_SALTY Uncharacterized protein yncE | 15 | Oxidation+M(5)        | GAYEMAWSQQENALWLATSQSR                              | 41  | 22 | 4  | 13.39  | b5y3°y3y5                                               | 2543.13 | 62.677  | 2131  | 4 | 636.54  | -13.25 |
| Q8ZK80 RL9_SALTY 50S ribosomal protein L9      | 1  |                       | NVEYFEAR                                            | 42  | 8  | 8  | 56.99  | y2y3y4y6°y6y7°y7y8                                      | 1027.48 | 47.445  | 70032 | 2 | 514.24  | -7.37  |
| Q8ZK80 RL9_SALTY 50S ribosomal protein L9      | 2  |                       | VANLGSGLDQVNVK                                      | 8   | 14 | 12 | 103.13 | b2b3b6y3y7y9y10°y10y11y12y13y14                         | 1413.77 | 57.411  | 69287 | 2 | 707.39  | 0.35   |
| Q8ZK80 RL9_SALTY 50S ribosomal protein L9      | 3  |                       | DIADAVTAAGVDVAK                                     | 97  | 15 | 6  | 39.81  | b13y3y4°y4y6y9                                          | 1415.74 | 66.803  | 58086 | 2 | 708.37  | -1.12  |
| Q8ZK80 RL9_SALTY 50S ribosomal protein L9      | 4  |                       | INALETVTIASK                                        | 71  | 12 | 6  | 22.21  | b2b3°b3y7y11y12                                         | 1259.71 | 61.683  | 34253 | 2 | 630.36  | -7.17  |
| Q8ZK80 RL9_SALTY 50S ribosomal protein L9      | 5  |                       | MQVILLDK                                            | 0   | 8  | 3  | 40.79  | y3y4y5                                                  | 959.55  | 64.808  | 56238 | 2 | 480.28  | -12.28 |
| Q8ZK80 RL9_SALTY 50S ribosomal protein L9      | 6  |                       | TTGEHEVNFQVHSEVFAK                                  | 123 | 18 | 4  | 15.53  | b5b13°b13y10                                            | 2059.01 | 80.418  | 8383  | 3 | 687.01  | 11.98  |
| Q8ZK80 RL9_SALTY 50S ribosomal protein L9      | 7  |                       | LADVLAANAR                                          | 57  | 11 | 7  | 66.81  | b4b7y4y5°y5y8y9                                         | 1084.60 | 54.003  | 7192  | 1 | 1084.60 | -7.20  |
| P66692 RPIA_SALTY Ribose-5-phohate isomerase A | 1  |                       | AVGWAALQYVQPGTIVGVGTGSTAAHFIDALGTMK                 | 8   | 35 | 22 | 153.73 | b2b3b6b7b8b9b10b11y2y3y4y7y9°y9y10y15y17y19y20y24y28y35 | 3487.83 | 107.575 | 56211 | 3 | 1163.28 | 7.98   |
| P66692 RPIA_SALTY Ribose-5-phohate isomerase A | 2  | Carbamidomethyl+C(3)  | FICIADASK                                           | 112 | 9  | 8  | 76     | b5b7y2y4y5y6y7y9                                        | 1024.51 | 51.799  | 20854 | 2 | 512.76  | -3.81  |
| P66692 RPIA_SALTY Ribose-5-phohate isomerase A | 3  |                       | GADVALIGTPDGVK                                      | 201 | 14 | 4  | 38.43  | b12y5y6y7                                               | 1312.70 | 58.140  | 26275 | 2 | 656.85  | -7.44  |
| P66692 RPIA_SALTY Ribose-5-phohate isomerase A | 4  |                       | GGGAALTR                                            | 94  | 8  | 3  | 33.01  | b3b4y5                                                  | 702.40  | 42.296  | 23184 | 1 | 702.40  | 21.46  |
| P66692 RPIA_SALTY Ribose-5-phohate isomerase A | 5  |                       | GQIEGAVSSSDASTEK                                    | 43  | 16 | 4  | 27.58  | b11y3y5y12                                              | 1565.73 | 32.431  | 1618  | 2 | 783.37  | 2.34   |
| P66692 RPIA_SALTY Ribose-5-phohate isomerase A | 6  |                       | QVDILGKFPLPVEVIPMAR                                 | 121 | 19 | 3  | 34.48  | y5y6y7                                                  | 2122.19 | 100.033 | 36686 | 3 | 708.07  | -7.36  |
| P66692 RPIA_SALTY Ribose-5-phohate isomerase A | 7  |                       | GQIEGAVSSSDASTEKLK                                  | 43  | 18 | 5  | 22.93  | b3°b3b4°b4y11                                           | 1806.89 | 39.814  | 7498  | 3 | 602.97  | -7.36  |
| P66692 RPIA_SALTY Ribose-5-phohate isomerase A | 8  |                       | AVGWAALQYVQPGTIVGVGTGSTAAHFIDALGTMKQGIEGAVSSSDASTEK | 8   | 51 | 4  | 11.71  | b3b12°b12y6                                             | 5034.45 | 111.116 | 3052  | 4 | 1259.37 | -12.12 |
| P0A2F4 SODF_SALTY Superoxide dismutase [Fe]    | 1  |                       | SFELPALPYAK                                         | 1   | 11 | 8  | 47.6   | b3b4°b4b6y2y4y7y11                                      | 1235.66 | 79.424  | 25135 | 2 | 618.34  | -1.88  |
| P0A2F4 SODF_SALTY Superoxide dismutase [Fe]    | 2  | Carbamidomethyl+C(22) | TSEGGIFNNAQVWNHTFYWNCLAPNAGGEPTGK                   | 58  | 34 | 14 | 50.58  | b1°b1b2°b2b6b11y2y3y4y8y9y10°y10°y10                    | 3708.70 | 96.372  | 19238 | 3 | 1236.91 | 2.90   |
| P0A2F4 SODF_SALTY Superoxide dismutase [Fe]    | 3  |                       | NARPNYLEHFWALVNWEFVAK                               | 168 | 21 | 8  | 29.94  | b1b2b3b5°b5b6b10y1                                      | 2604.31 | 104.451 | 11215 | 3 | 868.77  | -2.81  |
| P0A2F4 SODF_SALTY Superoxide dismutase [Fe]    | 4  |                       | DALAPHISAETLEYHYGK                                  | 12  | 18 | 5  | 30.87  | b8b10b15y5y10                                           | 2014.95 | 87.769  | 21733 | 2 | 1007.98 | -18.36 |
| P0A2F4 SODF_SALTY Superoxide dismutase [Fe]    | 5  |                       | SFELPALPYAKDALAPHISAETLEYHYGK                       | 1   | 29 | 3  | 11.5   | b5b12y7                                                 | 3231.62 | 81.347  | 25224 | 4 | 808.66  | -6.50  |
| P0A2F4 SODF_SALTY Superoxide dismutase [Fe]    | 6  |                       | HHQTYVTNLNLIKGTAFEGK                                | 30  | 21 | 4  | 18.85  | b4b8y3y6                                                | 2385.20 | 86.573  | 10230 | 3 | 795.74  | -13.82 |
| Q7CPE2 ATPB_SALTY ATP synthase subunit beta    | 1  |                       | QLDPLVVGQEHYDTAR                                    | 343 | 16 | 11 | 115.41 | b2°b2y3y4y5y6y9y10y11y13y14                             | 1840.89 | 58.529  | 56927 | 3 | 614.30  | -14.06 |

|                                                 |    |                       |                                        |     |    |    |        |                                              |         |         |       |   |         |        |
|-------------------------------------------------|----|-----------------------|----------------------------------------|-----|----|----|--------|----------------------------------------------|---------|---------|-------|---|---------|--------|
| Q7CPE2 ATPB_SALTY ATP synthase subunit beta     | 2  |                       | VALTGLTMAEK                            | 219 | 11 | 7  | 84.59  | y3y5y7y8y9y10y11                             | 1133.62 | 59.967  | 51079 | 2 | 567.31  | -6.89  |
| Q7CPE2 ATPB_SALTY ATP synthase subunit beta     | 3  |                       | GLDVKDLHPiEVPVGK                       | 65  | 17 | 6  | 16.26  | b3b9°b9y2y3y17                               | 1844.99 | 67.877  | 47835 | 3 | 615.67  | -12.50 |
| Q7CPE2 ATPB_SALTY ATP synthase subunit beta     | 4  |                       | YTLAGTEVSALLGR                         | 247 | 14 | 8  | 24.66  | b2b8°b8b9°b9y2y11y14                         | 1450.79 | 80.221  | 40569 | 2 | 725.90  | -0.76  |
| Q7CPE2 ATPB_SALTY ATP synthase subunit beta     | 5  |                       | TVNMMELIR                              | 156 | 9  | 5  | 38.19  | y1y3y4y5y9                                   | 1106.56 | 76.303  | 38250 | 2 | 553.78  | -8.05  |
| Q7CPE2 ATPB_SALTY ATP synthase subunit beta     | 6  |                       | FLSQPFFVAEVFTGSPGK                     | 399 | 18 | 6  | 24.74  | b2b17y3y7y13y18                              | 1958.02 | 99.744  | 38073 | 2 | 979.51  | 7.36   |
| Q7CPE2 ATPB_SALTY ATP synthase subunit beta     | 7  |                       | GIMEGEYDHLPEQAFYMVGSIDE AVEK           | 429 | 27 | 5  | 22.73  | b2y6y7y9y27                                  | 3057.41 | 99.953  | 37845 | 3 | 1019.81 | 6.95   |
| Q7CPE2 ATPB_SALTY ATP synthase subunit beta     | 8  | Carbamidomethyl+C(6)  | VIDLMCPFAK                             | 132 | 10 | 5  | 51.78  | y4y5y6y8y10                                  | 1193.60 | 80.990  | 31408 | 2 | 597.30  | -5.11  |
| Q7CPE2 ATPB_SALTY ATP synthase subunit beta     | 9  |                       | QIASLGIYPAVDPLDSTSR                    | 324 | 19 | 5  | 25.79  | b3y4y5y11y19                                 | 2003.06 | 80.671  | 30208 | 2 | 1002.03 | 6.16   |
| Q7CPE2 ATPB_SALTY ATP synthase subunit beta     | 10 |                       | MPSAVGYQPTLAEEMGVLQER                  | 261 | 21 | 6  | 24.63  | b7b21y3y4y11y21                              | 2306.14 | 81.765  | 25094 | 2 | 1153.57 | 9.53   |
| Q7CPE2 ATPB_SALTY ATP synthase subunit beta     | 11 |                       | AAPSYEELSNSQELLETGIK                   | 112 | 20 | 5  | 21.11  | y1y3y12y18y20                                | 2179.10 | 74.128  | 21638 | 2 | 1090.05 | 10.31  |
| Q7CPE2 ATPB_SALTY ATP synthase subunit beta     | 12 |                       | GVQSILQR                               | 359 | 8  | 4  | 40.79  | y3y5y6y8                                     | 900.52  | 48.664  | 15125 | 2 | 450.76  | -11.05 |
| Q7CPE2 ATPB_SALTY ATP synthase subunit beta     | 13 |                       | VYDALEVQNGNEK                          | 25  | 13 | 5  | 20.57  | b2b3b9y11y13                                 | 1478.72 | 45.235  | 9552  | 2 | 739.86  | 4.54   |
| Q7CPE2 ATPB_SALTY ATP synthase subunit beta     | 14 |                       | TGSITSVQAVYVPADDLTDPSPAT TFAHLDATVVLRS | 287 | 37 | 5  | 35.96  | b7°b7b8b9y19                                 | 3815.98 | 89.104  | 7673  | 5 | 764.00  | 12.54  |
| Q7CPE2 ATPB_SALTY ATP synthase subunit beta     | 15 |                       | TREGNDFYHEMTDSNVIDK                    | 183 | 19 | 5  | 25.79  | b3b4b8y9y19                                  | 2271.01 | 68.470  | 6856  | 4 | 568.51  | 4.09   |
| Q7CPE2 ATPB_SALTY ATP synthase subunit beta     | 16 |                       | TIAMGSSDGLR                            | 53  | 11 | 3  | 27.24  | b6y9y10                                      | 1107.54 | 44.091  | 5383  | 2 | 554.27  | -7.49  |
| Q7CPE2 ATPB_SALTY ATP synthase subunit beta     | 17 |                       | IMNVLGEPVDMK                           | 87  | 12 | 4  | 34.15  | b6y8y9y11                                    | 1345.70 | 58.067  | 11214 | 2 | 673.35  | 8.16   |
| Q7CPE2 ATPB_SALTY ATP synthase subunit beta     | 18 |                       | DLEHPiEVPVGK                           | 70  | 12 | 4  | 32.42  | b5b7b9°b9                                    | 1332.70 | 56.284  | 6358  | 2 | 666.85  | -10.17 |
| Q7CPE2 ATPB_SALTY ATP synthase subunit beta     | 19 |                       | VSLVYQGMNEPPGNR                        | 202 | 15 | 8  | 36.97  | b9°b9b13y4*y4y6y8°y8                         | 1660.80 | 46.955  | 1635  | 3 | 554.27  | -5.59  |
| Q7CPE2 ATPB_SALTY ATP synthase subunit beta     | 20 |                       | ATGKIVQVIGAVVDVEFPQDAVP R              | 1   | 24 | 5  | 23.36  | b4y5y6y8°y8                                  | 2508.37 | 44.461  | 44567 | 4 | 627.85  | -3.02  |
| Q7CPE2 ATPB_SALTY ATP synthase subunit beta     | 21 | Carbamidomethyl+C(26) | AAPSYEELSNSQELLETGIKVIDLM CPFAK        | 112 | 30 | 18 | 141.67 | b4b5b6b7b8°b8b20b24y4y5y6y7y8°y8y13y22y25y28 | 3353.69 | 120.575 | 37959 | 3 | 1118.57 | 6.41   |
| Q7CPE2 ATPB_SALTY ATP synthase subunit beta     | 22 |                       | VSLVYQGMNEPPGNRLR                      | 202 | 17 | 4  | 39.07  | b8b11b12b13                                  | 1930.01 | 84.421  | 14000 | 2 | 965.51  | 8.35   |
| Q7CPE2 ATPB_SALTY ATP synthase subunit beta     | 23 | Carbamidomethyl+C(6)  | VIDLMCPFAKGGK                          | 132 | 13 | 3  | 20.57  | b8y3y10                                      | 1435.73 | 57.407  | 9423  | 3 | 479.25  | -10.37 |
| Q7CPE2 ATPB_SALTY ATP synthase subunit beta     | 24 | Oxidation+M(17)       | GIMEGEYDHLPEQAFYMVGSIDE AVEK           | 429 | 27 | 4  | 17.72  | b7y8y10y13                                   | 3073.40 | 92.679  | 27301 | 4 | 769.10  | 5.48   |
| Q7CPE2 ATPB_SALTY ATP synthase subunit beta     | 25 | Oxidation+M(4)        | TIAMGSSDGLRR                           | 53  | 12 | 5  | 36.07  | b6b7y8y10°y10                                | 1279.65 | 57.326  | 4261  | 2 | 640.33  | 7.54   |
| Q7CPE2 ATPB_SALTY ATP synthase subunit beta     | 26 |                       | FLSQPFFVAEVFT                          | 399 | 13 | 1  | 7.34   | y5                                           | 1531.77 | 99.730  | 4670  | 1 | 1531.77 | -10.84 |
| Q7CPE2 ATPB_SALTY ATP synthase subunit beta     | 27 |                       | DVKDLHPiEVPVGK                         | 67  | 15 | 2  | 7.28   | b8°b8                                        | 1674.88 | 67.846  | 4635  | 3 | 558.97  | -13.63 |
| Q7CPE2 ATPB_SALTY ATP synthase subunit beta     | 28 |                       | GVQSILQ                                | 359 | 7  | 1  | 9.64   | y6                                           | 744.42  | 48.677  | 1942  | 2 | 372.72  | -3.12  |
| P0A2M5 UPP_SALTY Uracil phohoribosyltransferase | 1  |                       | AGLGMMEGVLENVPSAR                      | 78  | 17 | 8  | 43.69  | b11b13b14y1y4y6y12y17                        | 1730.87 | 81.984  | 47685 | 2 | 865.94  | 5.29   |
| P0A2M5 UPP_SALTY Uracil phohoribosyltransferase | 2  |                       | VLVLVAAPEGIAALEK                       | 155 | 16 | 8  | 71.82  | b2b3b4b5b6b7y9y11                            | 1592.97 | 86.111  | 24116 | 2 | 796.99  | 1.84   |

|                                                  |    |                                          |                                           |     |    |    |       |                                   |         |         |       |   |         |        |
|--------------------------------------------------|----|------------------------------------------|-------------------------------------------|-----|----|----|-------|-----------------------------------|---------|---------|-------|---|---------|--------|
| [P0A2M5]UPP_SALTY Uracil phohoribosyltransferase | 3  |                                          | ITVVPILR                                  | 70  | 8  | 4  | 53.98 | y4y5y6y7                          | 910.60  | 70.248  | 10931 | 2 | 455.80  | -10.86 |
| [P0A2M5]UPP_SALTY Uracil phohoribosyltransferase | 4  |                                          | NEETLEPVYPYFQK                            | 103 | 13 | 3  | 20.57 | b7y5y7                            | 1593.80 | 66.178  | 17643 | 2 | 797.41  | 14.71  |
| [P0A2M5]UPP_SALTY Uracil phohoribosyltransferase | 5  |                                          | ELASEVGSLLTYEATADLETEK                    | 29  | 22 | 4  | 13.39 | b6°b6y12y14                       | 2369.21 | 88.843  | 3364  | 2 | 1185.11 | 20.92  |
| [P0A2M5]UPP_SALTY Uracil phohoribosyltransferase | 6  |                                          | AHPDVELYTASIDQGLNEHGYIIP<br>GLGDAGDKIFGTK | 171 | 37 | 5  | 16.21 | b8b11y3y11y14                     | 3911.93 | 88.884  | 21857 | 4 | 978.74  | -3.99  |
| [P0A2M5]UPP_SALTY Uracil phohoribosyltransferase | 7  |                                          | AGLGMMEGVLENVPSARISVVG<br>MYR             | 78  | 25 | 3  | 12.37 | b15y6y23                          | 2636.35 | 84.922  | 18792 | 3 | 879.46  | 6.95   |
| [P55900]SERC_SALTY Phohoserine aminotransferase  | 1  |                                          | AQVFNFSSGPAMLPAEVLK                       | 1   | 19 | 7  | 31.52 | b6b7°b7b14y13y16y19               | 2006.06 | 91.512  | 26181 | 2 | 1003.53 | 7.55   |
| [P55900]SERC_SALTY Phohoserine aminotransferase  | 2  |                                          | GKEFIQVAEEAEQDFRDLNIPSN<br>YK             | 42  | 26 | 8  | 18.22 | b3b9°b9b12°b12y1y4y26             | 3053.55 | 132.657 | 20281 | 3 | 1018.52 | 8.16   |
| [P55900]SERC_SALTY Phohoserine aminotransferase  | 3  |                                          | ASIYNAMPIEGVK                             | 335 | 13 | 7  | 39.2  | b11y1y8y9*y9y10y13                | 1392.72 | 65.399  | 19567 | 2 | 696.86  | -0.61  |
| [P55900]SERC_SALTY Phohoserine aminotransferase  | 4  |                                          | YGVIIYAGAQK                               | 188 | 10 | 8  | 61    | b2b3b4b7b9*b9y4y10                | 1069.55 | 44.123  | 14126 | 2 | 535.28  | -12.55 |
| [P55900]SERC_SALTY Phohoserine aminotransferase  | 5  |                                          | GKEFIQVAEEAEQDFR                          | 42  | 16 | 4  | 24.8  | y3y5y7y16                         | 1895.92 | 53.205  | 12266 | 3 | 632.65  | 4.44   |
| [P55900]SERC_SALTY Phohoserine aminotransferase  | 6  |                                          | ALTDFMIDFER                               | 348 | 11 | 7  | 55.38 | b2b5b6y4°y4y5y6                   | 1357.65 | 90.590  | 9967  | 2 | 679.33  | -0.27  |
| [P55900]SERC_SALTY Phohoserine aminotransferase  | 7  | Carbamidomethyl+C(7)                     | LAQQELCDWHGLGTSVMEISHR                    | 20  | 22 | 4  | 18.1  | b3b12y6y10                        | 2567.22 | 118.862 | 3587  | 3 | 856.41  | 1.33   |
| [P55900]SERC_SALTY Phohoserine aminotransferase  | 8  |                                          | AELLYGVIDNSDFYR                           | 272 | 15 | 3  | 26.16 | y3y4y12                           | 1774.86 | 107.593 | 1786  | 2 | 887.93  | -1.31  |
| [P55900]SERC_SALTY Phohoserine aminotransferase  | 9  |                                          | MNVPFQLADNTLDK                            | 297 | 14 | 5  | 27.48 | b3b5°b5y5y13                      | 1605.82 | 58.498  | 22075 | 2 | 803.41  | 14.98  |
| [P55900]SERC_SALTY Phohoserine aminotransferase  | 10 |                                          | GQFAGVPLNLLGDK                            | 77  | 14 | 3  | 19.22 | b3b10y6                           | 1428.77 | 65.224  | 7911  | 3 | 476.93  | -9.83  |
| [P55900]SERC_SALTY Phohoserine aminotransferase  | 11 |                                          | TTADYVDAGYWAASAIKEAK                      | 91  | 20 | 3  | 14.32 | b6y4y16                           | 2131.03 | 101.292 | 43987 | 3 | 711.01  | -1.95  |
| [P55900]SERC_SALTY Phohoserine aminotransferase  | 12 |                                          | AELLYGVIDNSDFYRNDVAQANR                   | 272 | 23 | 10 | 56.95 | b6b13°b13y4y8y10y12y13<br>y14°y14 | 2643.26 | 79.479  | 13232 | 3 | 881.76  | -7.02  |
| [P55900]SERC_SALTY Phohoserine aminotransferase  | 13 | Carbamidomethyl+C(3)                     | KYCAPQIIDAK                               | 111 | 11 | 4  | 36.63 | b3b5b6y10                         | 1306.69 | 48.843  | 6600  | 2 | 653.85  | 6.07   |
| [P55900]SERC_SALTY Phohoserine aminotransferase  | 14 |                                          | WLKAQGGVAAMHK                             | 254 | 13 | 3  | 28.05 | y5y9y10                           | 1396.77 | 88.732  | 3400  | 2 | 698.89  | 12.41  |
| [P55900]SERC_SALTY Phohoserine aminotransferase  | 15 |                                          | SRMNVPFQLADNTLDK                          | 295 | 16 | 3  | 17.1  | b4b8y7                            | 1848.92 | 69.485  | 3000  | 3 | 616.98  | -2.57  |
| [P55900]SERC_SALTY Phohoserine aminotransferase  | 16 |                                          | ASIYNAMPIEGVKALTDFMIDFER                  | 335 | 24 | 3  | 12.67 | b3b5y7                            | 2731.36 | 119.615 | 2146  | 3 | 911.12  | 3.22   |
| [P55900]SERC_SALTY Phohoserine aminotransferase  | 17 |                                          | GKEFIQVAEEAEQDFR                          | 42  | 16 | 8  | 55.31 | b3°b3b5b10b11y4y7y9               | 1895.90 | 42.162  | 2111  | 3 | 632.64  | -8.43  |
| [P55900]SERC_SALTY Phohoserine aminotransferase  | 18 |                                          | ALTDFMIDFERR                              | 348 | 12 | 3  | 32.42 | y3y7y10                           | 1513.77 | 82.018  | 1669  | 2 | 757.39  | 13.31  |
| [P55900]SERC_SALTY Phohoserine aminotransferase  | 19 | Phosphoryl.STY(6)                        | VFLEESFAAGLHALK                           | 311 | 15 | 3  | 24.1  | b4y10y11                          | 1711.83 | 49.844  | 15227 | 2 | 856.42  | -2.57  |
| [P55900]SERC_SALTY Phohoserine aminotransferase  | 20 | Carbamidomethyl+C(7);<br>Oxidation+M(17) | LAQQELCDWHGLGTSVMEISHR                    | 20  | 22 | 7  | 30.56 | b3b5°b5b9b11°b11y5                | 2583.20 | 91.662  | 9783  | 4 | 646.56  | -1.70  |
| [P55900]SERC_SALTY Phohoserine aminotransferase  | 21 | Oxidation+M(1)                           | MNVPFQLADNTLDK                            | 297 | 14 | 4  | 30.65 | b3b4b11y10                        | 1621.79 | 80.244  | 5183  | 3 | 541.27  | 2.26   |
| [Q8ZRP4]DAPD_SALTY 2                             | 1  |                                          | EAVNQVISLLDSGALR                          | 28  | 16 | 12 | 81.8  | b2°b2b14y2y4y5y6y7y9y12<br>y13y16 | 1684.93 | 92.145  | 46443 | 2 | 842.97  | 2.61   |
| [Q8ZRP4]DAPD_SALTY 2                             | 2  |                                          | MQQLQNVIETAER                             | 0   | 14 | 9  | 50.55 | b4°b4b12y3y9y11°y11y12<br>y14     | 1706.86 | 86.081  | 41245 | 2 | 853.93  | 3.93   |
| [Q8ZRP4]DAPD_SALTY 2                             | 3  |                                          | INDNQVIDGAESR                             | 68  | 13 | 4  | 43.01 | y5y6y7y10                         | 1430.69 | 42.050  | 22510 | 2 | 715.85  | 0.09   |
| [Q8ZRP4]DAPD_SALTY 2                             | 4  |                                          | FADYDEAR                                  | 89  | 8  | 5  | 53.98 | y2y4y5y6y7                        | 986.42  | 35.332  | 10739 | 2 | 493.71  | -6.50  |

|                                                      |    |                       |                                      |     |    |    |       |                                 |         |         |       |   |         |        |
|------------------------------------------------------|----|-----------------------|--------------------------------------|-----|----|----|-------|---------------------------------|---------|---------|-------|---|---------|--------|
| Q8ZRP4 DAPD_SALTY 2                                  | 5  |                       | IDGQWVTHQWLK                         | 48  | 12 | 3  | 26.19 | b3y9y10                         | 1510.76 | 114.852 | 4187  | 3 | 504.26  | -10.26 |
| Q8ZRP4 DAPD_SALTY 2                                  | 6  |                       | EGFR                                 | 100 | 4  | 1  | 12.78 | b3                              | 508.26  | 37.573  | 11935 | 1 | 508.26  | 13.51  |
| Q8ZRP4 DAPD_SALTY 2                                  | 7  | Carbamidomethyl+C(28) | NVHLSGGVGIGGVLEPLQANPTIE<br>DNCFIGAR | 154 | 33 | 6  | 24.49 | b7y3y6y7*y7y10                  | 3417.69 | 96.016  | 6380  | 5 | 684.34  | -21.00 |
| Q8ZRP4 DAPD_SALTY 2                                  | 8  |                       | AVLLSFR                              | 61  | 7  | 3  | 40.38 | y3y4y5                          | 805.49  | 66.492  | 4782  | 2 | 403.25  | -9.02  |
| Q8ZRP4 DAPD_SALTY 2                                  | 9  |                       | ADITPANVDTVTR                        | 15  | 13 | 6  | 63.19 | b4b6b8b9*b9b11                  | 1372.73 | 91.648  | 3403  | 2 | 686.87  | 13.34  |
| Q8ZRP4 DAPD_SALTY 2                                  | 10 |                       | SEVVEGVIVEEGSVISMGVYLGS<br>TK        | 187 | 26 | 4  | 15.73 | b3b10y7y12                      | 2696.40 | 101.112 | 3101  | 3 | 899.47  | 10.14  |
| Q8ZRP4 DAPD_SALTY 2                                  | 11 |                       | IYDRETGEVHYGR                        | 213 | 13 | 3  | 20.57 | b7b9y3                          | 1594.78 | 68.618  | 4477  | 2 | 797.89  | 9.49   |
| P60446 RL3_SALTY 50S ribosomal<br>protein L3         | 1  |                       | VTVQSLDVVR                           | 169 | 10 | 12 | 86.58 | b1b5*b5b7y1y2y3y5y6y7y<br>8y10  | 1115.63 | 57.258  | 58269 | 2 | 558.32  | -10.39 |
| P60446 RL3_SALTY 50S ribosomal<br>protein L3         | 2  |                       | TQDATHGNSLSHR                        | 128 | 13 | 4  | 28.05 | y3y6y7y13                       | 1423.65 | 15.574  | 6245  | 3 | 475.22  | -13.55 |
| P60446 RL3_SALTY 50S ribosomal<br>protein L3         | 3  |                       | IFTEDGVSIPVTVIEVEANR                 | 13  | 20 | 4  | 22.45 | b13y4y5*y5                      | 2188.14 | 97.416  | 2800  | 3 | 730.05  | -3.12  |
| P60446 RL3_SALTY 50S ribosomal<br>protein L3         | 4  |                       | LAEGEETYVGQSSISVELFADVKK             | 83  | 23 | 5  | 28.73 | b3b6b11*b11b14                  | 2512.29 | 118.304 | 1783  | 3 | 838.10  | 4.86   |
| P60446 RL3_SALTY 50S ribosomal<br>protein L3         | 5  |                       | GLWEFR                               | 77  | 6  | 2  | 26.79 | b5y4                            | 807.42  | 46.231  | 54601 | 2 | 404.21  | 6.35   |
| P60446 RL3_SALTY 50S ribosomal<br>protein L3         | 6  |                       | NLLLVK                               | 184 | 6  | 3  | 39.98 | y3y4y5                          | 699.47  | 56.996  | 24328 | 1 | 699.47  | -5.58  |
| P60446 RL3_SALTY 50S ribosomal<br>protein L3         | 7  | Carbamidomethyl+C(9)  | GGVPGATGCDLIVKPAVK                   | 190 | 18 | 4  | 21.66 | b5b9y4y15                       | 1738.91 | 54.679  | 12654 | 3 | 580.31  | -21.34 |
| P60446 RL3_SALTY 50S ribosomal<br>protein L3         | 8  | Carbamidomethyl+C(9)  | GGVPGATGCDLIVKPAVKA                  | 190 | 19 | 6  | 57.81 | y5y6y7y9y12y16                  | 1809.97 | 56.908  | 59758 | 3 | 603.99  | -11.94 |
| P60446 RL3_SALTY 50S ribosomal<br>protein L3         | 9  |                       | IFTEDGVSIPVTVIEVEANRVTQVK            | 13  | 25 | 5  | 22.64 | b3b8y16y18y20                   | 2743.49 | 94.995  | 58648 | 3 | 915.17  | 1.33   |
| P60446 RL3_SALTY 50S ribosomal<br>protein L3         | 10 |                       | WNFRTQDATHGNSLSHR                    | 124 | 17 | 5  | 26.06 | b6b9b12y7*y7                    | 2026.93 | 73.867  | 9069  | 2 | 1013.97 | -13.49 |
| P60446 RL3_SALTY 50S ribosomal<br>protein L3         | 11 | Phosphoryl STY(6)     | AVQVTTGAKK                           | 46  | 10 | 4  | 26.83 | b5y6*y6y8                       | 1082.56 | 26.385  | 5274  | 2 | 541.78  | 5.75   |
| P60446 RL3_SALTY 50S ribosomal<br>protein L3         | 12 | Phosphoryl STY(10)    | VPGSIGQNQTPGK                        | 141 | 13 | 3  | 20.57 | b7b9y5                          | 1362.61 | 58.540  | 1588  | 3 | 454.88  | -13.71 |
| O54297 RS4_SALTY 30S ribosomal<br>protein S4         | 1  |                       | VVNIASYQVSPNDVVSIR                   | 128 | 18 | 11 | 76.45 | b3y1y2y3y8y9y10y11y13y<br>14y18 | 1960.06 | 72.603  | 35065 | 2 | 980.53  | 4.42   |
| O54297 RS4_SALTY 30S ribosomal<br>protein S4         | 2  |                       | LSDYGVQLR                            | 47  | 9  | 6  | 45.36 | b7y2y5y7y8y9                    | 1050.56 | 51.737  | 21377 | 2 | 525.78  | -1.86  |
| O54297 RS4_SALTY 30S ribosomal<br>protein S4         | 3  |                       | AALELAEQREKPTWLEVDAGK                | 156 | 21 | 6  | 21.62 | b3b7*b7b10y6*y6                 | 2354.25 | 95.067  | 6103  | 3 | 785.42  | 6.95   |
| O54297 RS4_SALTY 30S ribosomal<br>protein S4         | 4  |                       | VVNIASYQVSPNDVVSIREK                 | 128 | 20 | 3  | 21.11 | b6b8b12                         | 2217.20 | 96.153  | 4102  | 3 | 739.74  | 5.62   |
| O54297 RS4_SALTY 30S ribosomal<br>protein S4         | 5  |                       | SDLSADINEHLIVELYSK                   | 188 | 18 | 3  | 15.53 | b6b17y3                         | 2046.05 | 84.509  | 2634  | 3 | 682.69  | 4.83   |
| O54297 RS4_SALTY 30S ribosomal<br>protein S4         | 6  |                       | GNTGENLLALLEGR                       | 83  | 14 | 5  | 42.29 | b5b8b12b13y3                    | 1456.79 | 70.964  | 23460 | 2 | 728.90  | 8.97   |
| O54297 RS4_SALTY 30S ribosomal<br>protein S4         | 7  |                       | EAAR                                 | 77  | 4  | 1  | 12.78 | b3                              | 446.23  | 45.536  | 2224  | 1 | 446.23  | -7.32  |
| O54297 RS4_SALTY 30S ribosomal<br>protein S4         | 8  |                       | IEQAPGQHGARKPR                       | 33  | 14 | 5  | 19.22 | b3*b3b8*b8y10                   | 1544.85 | 54.724  | 7333  | 3 | 515.62  | 9.09   |
| O54297 RS4_SALTY 30S ribosomal<br>protein S4         | 9  |                       | ASYQVSPNDVVSIREK                     | 132 | 16 | 3  | 21.11 | b4b10b12                        | 1791.90 | 96.128  | 3893  | 2 | 896.46  | -11.65 |
| P0A2E1 GLYA_SALTY Serine<br>hydroxymethyltransferase | 1  |                       | LNSAVFPSAQGGPLMHVIAGK                | 251 | 21 | 6  | 22.28 | b2b3*b3y3y4y21                  | 2094.10 | 78.504  | 39322 | 3 | 698.71  | -6.76  |
| P0A2E1 GLYA_SALTY Serine<br>hydroxymethyltransferase | 2  |                       | SPFVTSGIR                            | 354 | 9  | 7  | 59.8  | b1b6b7y4y5y7y9                  | 963.52  | 49.763  | 30494 | 2 | 482.26  | -4.56  |
| P0A2E1 GLYA_SALTY Serine<br>hydroxymethyltransferase | 3  |                       | VMQAQGSQLTNK                         | 42  | 12 | 8  | 64.03 | b2y2y3y4y6y7y9y12               | 1304.66 | 30.544  | 20542 | 2 | 652.83  | -2.43  |
| P0A2E1 GLYA_SALTY Serine<br>hydroxymethyltransferase | 4  |                       | AVALKEAMEPEFK                        | 272 | 13 | 10 | 76.34 | b2b8b9y2y3y4y5y8y9y13           | 1462.75 | 56.666  | 7596  | 2 | 731.88  | -4.59  |

|                                                              |    |                                        |                                |     |    |    |        |                                                                  |         |         |       |   |         |        |
|--------------------------------------------------------------|----|----------------------------------------|--------------------------------|-----|----|----|--------|------------------------------------------------------------------|---------|---------|-------|---|---------|--------|
| P0A2E1 GLYA_SALTY Serine hydroxymethyltransferase            | 5  |                                        | EAMEPEFK                       | 277 | 8  | 5  | 36.02  | b3b5y2y4y8                                                       | 980.44  | 44.195  | 3379  | 2 | 490.72  | -2.49  |
| P0A2E1 GLYA_SALTY Serine hydroxymethyltransferase            | 6  | Carbamidomethyl+C(7)                   | ELAGWMCDVLDNINDEATIER          | 380 | 21 | 4  | 23.48  | y5y10y11*y11                                                     | 2464.15 | 101.499 | 13479 | 2 | 1232.58 | 15.46  |
| P0A2E1 GLYA_SALTY Serine hydroxymethyltransferase            | 7  |                                        | YAEGYPGK                       | 54  | 8  | 4  | 33.01  | b3°b3b4y4                                                        | 884.42  | 61.033  | 4976  | 2 | 442.71  | 7.87   |
| P0A2E1 GLYA_SALTY Serine hydroxymethyltransferase            | 8  |                                        | MIIGGFSAYSGVVDWAK              | 168 | 17 | 5  | 43.43  | b7b10y3y4y5                                                      | 1800.94 | 106.128 | 1565  | 3 | 600.98  | 21.56  |
| P0A2E1 GLYA_SALTY Serine hydroxymethyltransferase            | 9  |                                        | GYKVVSOGGTENHLFLDLVDK          | 305 | 21 | 3  | 13.83  | b10y11y14                                                        | 2304.21 | 101.320 | 41470 | 2 | 1152.61 | -4.98  |
| P0A2E1 GLYA_SALTY Serine hydroxymethyltransferase            | 10 |                                        | LYNIVPYGIDESGKIDYDEMAK         | 138 | 22 | 6  | 34.88  | b3b14y5y11y17y18                                                 | 2533.21 | 76.774  | 37667 | 3 | 845.08  | -1.06  |
| P0A2E1 GLYA_SALTY Serine hydroxymethyltransferase            | 11 |                                        | VVSGGTENHLFLDLVDKNLTGK         | 308 | 23 | 5  | 13.01  | b10y3y21°y21*y21                                                 | 2469.30 | 92.113  | 31548 | 4 | 618.08  | -14.73 |
| P0A2E1 GLYA_SALTY Serine hydroxymethyltransferase            | 12 |                                        | NSVPNDPKSPFVTS GIR             | 346 | 17 | 7  | 53.66  | b3b10b11y8y9y11y14                                               | 1814.92 | 52.997  | 22877 | 3 | 605.64  | -11.64 |
| P0A2E1 GLYA_SALTY Serine hydroxymethyltransferase            | 13 |                                        | QEEHIELIASENYTSPRVMAQGS QLTNK  | 25  | 29 | 3  | 11.5   | b8y10y12                                                         | 3301.64 | 89.491  | 6577  | 4 | 826.16  | 7.10   |
| P0A2E1 GLYA_SALTY Serine hydroxymethyltransferase            | 14 |                                        | EMNIADYDAELWQAMEQE KVR         | 4   | 21 | 3  | 23.48  | y6y9y10                                                          | 2569.20 | 88.238  | 4883  | 3 | 857.07  | 10.55  |
| P0A2E1 GLYA_SALTY Serine hydroxymethyltransferase            | 15 | Oxidation+M(15)                        | LNSAVFPSAQGGPLMHVIAGK          | 251 | 21 | 7  | 35.09  | b3°b3b4°b4y3y14y18                                               | 2110.09 | 84.733  | 85447 | 3 | 704.04  | -9.37  |
| P0A2E1 GLYA_SALTY Serine hydroxymethyltransferase            | 16 | Carbamidomethyl+C(12) ;Oxidation+M(11) | EAEVKELAGWMCDVLDNINDEAT IER    | 375 | 26 | 3  | 12.11  | b4y6y9                                                           | 3036.39 | 79.558  | 10735 | 4 | 759.85  | -1.77  |
| P0A2E1 GLYA_SALTY Serine hydroxymethyltransferase            | 17 | Oxidation+M(16)                        | REMNIADYDAELWQAMEQE K          | 3   | 20 | 3  | 14.32  | b5b12y7                                                          | 2486.13 | 30.695  | 10548 | 3 | 829.38  | 12.47  |
| P0A2E1 GLYA_SALTY Serine hydroxymethyltransferase            | 18 |                                        | SPFVTSGI                       | 354 | 8  | 0  | 1.63   |                                                                  | 807.43  | 49.709  | 2138  | 2 | 404.22  | 1.13   |
| P66038 RISB_SALTY 6                                          | 1  |                                        | IGQVKDDNITVVWVPGAYELPLA TEALAK | 40  | 29 | 22 | 156.13 | b3b4b8b9b10°b10b11°b11°b11b12°b12b13°b13b14y3y4y9y11y12y15y16y29 | 3110.69 | 98.371  | 87748 | 3 | 1037.57 | 5.57   |
| P66038 RISB_SALTY 6                                          | 2  |                                        | FNQFINDSLLDGAVDALTR            | 21  | 19 | 18 | 186.4  | b3b4b5b12b13y3y4y5y6y8y9y10y12y14*y14y15y16y19                   | 2109.08 | 101.294 | 66139 | 2 | 1055.04 | 9.49   |
| P66038 RISB_SALTY 6                                          | 3  |                                        | GAEAALTALEMINVLK               | 136 | 16 | 7  | 41.85  | b6b7°b7b12°b12y3y4                                               | 1643.90 | 102.943 | 27494 | 2 | 822.46  | 0.30   |
| P66038 RISB_SALTY 6                                          | 4  |                                        | ANVAAPDAR                      | 5   | 9  | 8  | 54.39  | b2°b2y2y3y5y6y7y9                                                | 884.45  | 23.576  | 13660 | 2 | 442.73  | -10.35 |
| P66038 RISB_SALTY 6                                          | 5  |                                        | VAIT IAR                       | 14  | 7  | 4  | 53.57  | y3y4y5y6                                                         | 743.47  | 44.942  | 11117 | 2 | 372.24  | -15.11 |
| P66038 RISB_SALTY 6                                          | 6  |                                        | AGNKGAEAAALTALEMINVLK          | 132 | 20 | 3  | 21.11  | b6b8b16                                                          | 2014.09 | 97.165  | 31624 | 3 | 672.03  | -6.79  |
| P0A1A5 ILVE_SALTY Branched-chain-amino-acid aminotransferase | 1  |                                        | SVDGIQVGEGR                    | 266 | 11 | 14 | 76.2   | b1b3b4b7°b7y2y4°y4y5y6°y6y9°y9y11                                | 1116.56 | 42.189  | 17570 | 2 | 558.78  | -1.86  |
| P0A1A5 ILVE_SALTY Branched-chain-amino-acid aminotransferase | 2  |                                        | AAPNTIPTAAK                    | 149 | 11 | 8  | 36.63  | b3y1y2y3y8*y8y9y11                                               | 1054.58 | 32.930  | 16099 | 2 | 527.79  | -9.49  |
| P0A1A5 ILVE_SALTY Branched-chain-amino-acid aminotransferase | 3  |                                        | ELGIEVR                        | 231 | 7  | 4  | 37.37  | b3y2y4y5                                                         | 815.47  | 51.787  | 4654  | 2 | 408.24  | 4.12   |
| P0A1A5 ILVE_SALTY Branched-chain-amino-acid aminotransferase | 4  |                                        | EQVLSR                         | 238 | 6  | 1  | 13.6   | y3                                                               | 731.40  | 33.494  | 15852 | 1 | 731.40  | -5.84  |
| P0A1A5 ILVE_SALTY Branched-chain-amino-acid aminotransferase | 5  |                                        | ADYIWFNGEMVR                   | 5   | 12 | 6  | 36.07  | b4b9y7°y7y8°y8                                                   | 1500.69 | 60.143  | 10130 | 3 | 500.90  | -2.44  |
| P0A1A5 ILVE_SALTY Branched-chain-amino-acid aminotransferase | 6  |                                        | DGVLFTPPFTSSALPGITR            | 204 | 19 | 3  | 24.06  | b4b5b12                                                          | 1976.02 | 111.751 | 2556  | 2 | 988.52  | -12.66 |
| P0A1A5 ILVE_SALTY Branched-chain-amino-acid aminotransferase | 7  |                                        | IQQAFFGLFTGETEDK               | 284 | 16 | 3  | 17.1   | b8y7y9                                                           | 1830.85 | 64.442  | 1898  | 4 | 458.47  | -20.00 |
| P0A1A5 ILVE_SALTY Branched-chain-amino-acid aminotransferase | 8  | Phosphoryl STY(12)                     | DGVLFTPPFTSSALPGITR            | 204 | 19 | 6  | 42.78  | b5b6b9b10°b10y8                                                  | 2056.03 | 105.299 | 4482  | 2 | 1028.52 | 14.01  |
| P0A1A5 ILVE_SALTY Branched-chain-amino-acid aminotransferase | 9  | Oxidation+M(11)                        | ESLYLADEVFMSGTAAEITPVR         | 244 | 22 | 5  | 28.85  | b4b5b10y10y13                                                    | 2415.14 | 106.989 | 24830 | 3 | 805.72  | -12.84 |

|                                              |    |                      |                                      |     |    |    |        |                                                   |         |         |        |   |         |        |
|----------------------------------------------|----|----------------------|--------------------------------------|-----|----|----|--------|---------------------------------------------------|---------|---------|--------|---|---------|--------|
| Q7CPE1 ATPA_SALTY ATP synthase subunit alpha | 1  |                      | MQLNSTEISELIK                        | 0   | 13 | 11 | 32.21  | b2b12°b12*b12y2y8y10°y10y11*y11y13                | 1505.79 | 77.154  | 44065  | 2 | 753.40  | -0.49  |
| Q7CPE1 ATPA_SALTY ATP synthase subunit alpha | 2  | Carbamidomethyl+C(7) | IHGLADCMQGEMISLPGNR                  | 40  | 19 | 13 | 60.77  | b2b3b8b9b12b14y4y11°y11*y11y12°y12y19             | 2098.97 | 69.526  | 37766  | 3 | 700.33  | -6.16  |
| Q7CPE1 ATPA_SALTY ATP synthase subunit alpha | 3  |                      | ASTISNVVR                            | 201 | 9  | 6  | 53.14  | b5y1y3y5y7y9                                      | 946.52  | 38.122  | 25265  | 2 | 473.76  | -12.38 |
| Q7CPE1 ATPA_SALTY ATP synthase subunit alpha | 4  |                      | ELAAFSQFASDLDDATR                    | 401 | 17 | 5  | 50.5   | b6y3y4y5y6                                        | 1856.88 | 88.683  | 22430  | 2 | 928.94  | 7.89   |
| Q7CPE1 ATPA_SALTY ATP synthase subunit alpha | 5  |                      | DSVGAVVMGPYADLAEGMK                  | 68  | 19 | 8  | 51.64  | b5b7b8y7y10y12y14y19                              | 1909.92 | 83.783  | 22150  | 2 | 955.47  | 10.35  |
| Q7CPE1 ATPA_SALTY ATP synthase subunit alpha | 6  |                      | QLNSTEISELIK                         | 1   | 12 | 9  | 34.15  | b4b7°b9b10*b10y10°y10*y10y12                      | 1374.74 | 81.364  | 20675  | 2 | 687.87  | -7.55  |
| Q7CPE1 ATPA_SALTY ATP synthase subunit alpha | 7  |                      | QYAPMSVAQQLVLFAAER                   | 434 | 19 | 6  | 25.79  | b3y5°y5y6y16y19                                   | 2109.10 | 93.273  | 19539  | 2 | 1055.05 | 10.07  |
| Q7CPE1 ATPA_SALTY ATP synthase subunit alpha | 8  |                      | QSVDQPVPQTGYK                        | 139 | 12 | 7  | 35.43  | b12°b12y2y7y8y9y12                                | 1349.66 | 34.898  | 17492  | 2 | 675.33  | -5.34  |
| Q7CPE1 ATPA_SALTY ATP synthase subunit alpha | 9  | Carbamidomethyl+C(1) | CIYVAIGQK                            | 192 | 9  | 5  | 38.19  | b3b5b6y1y9                                        | 1051.55 | 58.136  | 17329  | 2 | 526.28  | -5.57  |
| Q7CPE1 ATPA_SALTY ATP synthase subunit alpha | 10 |                      | ELAAFSQFASDLDDATRK                   | 401 | 18 | 5  | 30.87  | b8b13y6y9y11                                      | 1984.95 | 83.473  | 13035  | 3 | 662.32  | -7.20  |
| Q7CPE1 ATPA_SALTY ATP synthase subunit alpha | 11 |                      | DHAPLMQEINQSGGYNDEIEGK               | 477 | 22 | 3  | 13.39  | b4b6y6                                            | 2445.12 | 90.709  | 6679   | 2 | 1223.07 | 10.58  |
| Q7CPE1 ATPA_SALTY ATP synthase subunit alpha | 12 |                      | GPVDNDGFSAVEAIAPGVDR                 | 118 | 21 | 3  | 20.47  | b5b13b16                                          | 2099.05 | 82.150  | 2442   | 2 | 1050.03 | 6.63   |
| Q7CPE1 ATPA_SALTY ATP synthase subunit alpha | 13 |                      | ILEVPVGR                             | 93  | 8  | 3  | 33.01  | b3y5y6                                            | 882.53  | 53.143  | 43832  | 2 | 441.77  | -12.73 |
| Q7CPE1 ATPA_SALTY ATP synthase subunit alpha | 14 |                      | IGSFEAALLAYVDRDHAPLMQEINQSGGYNDEIEGK | 463 | 36 | 3  | 10.89  | b8b22y11                                          | 3950.89 | 95.362  | 89799  | 4 | 988.48  | 1.92   |
| Q7CPE1 ATPA_SALTY ATP synthase subunit alpha | 15 |                      | VVNTLGAPIDGKGPPVDNDGFSAVEAIAPGVDR    | 106 | 33 | 9  | 26.69  | b7*b7b27°b27y6°y6y7y9y15                          | 3263.71 | 84.366  | 44076  | 3 | 1088.57 | 5.69   |
| Q7CPE1 ATPA_SALTY ATP synthase subunit alpha | 16 |                      | EAFPGDVFLHSRLER                      | 283 | 17 | 4  | 16.26  | b3b16°b16y11                                      | 2049.04 | 77.366  | 2418   | 3 | 683.69  | -5.96  |
| Q7CPE1 ATPA_SALTY ATP synthase subunit alpha | 17 | Oxidation+M(17)      | YAIALNLERDSVGAVVMGPYADLAEGMK         | 59  | 28 | 3  | 11.68  | b11b23y12                                         | 2969.52 | 123.010 | 2032   | 3 | 990.51  | 14.06  |
| Q7CPE1 ATPA_SALTY ATP synthase subunit alpha | 18 | Carbamidomethyl+C(1) | CIYVAIGQ                             | 192 | 8  | 0  | 1.63   |                                                   | 923.47  | 58.125  | 1710   | 2 | 462.24  | 5.88   |
| P64052 EFTS_SALTY Elongation factor Ts       | 1  |                      | ITDVEVLK                             | 104 | 8  | 6  | 56.99  | y2y3y4y6y7y8                                      | 916.52  | 49.342  | 122961 | 2 | 458.77  | -13.19 |
| P64052 EFTS_SALTY Elongation factor Ts       | 2  |                      | AEITASLVK                            | 1   | 9  | 5  | 54.39  | y4y5y6y7y9                                        | 931.54  | 49.383  | 83904  | 2 | 466.27  | -9.89  |
| P64052 EFTS_SALTY Elongation factor Ts       | 3  |                      | ALTEANGDIELAIENMRK                   | 25  | 18 | 3  | 22.69  | y9y14y16                                          | 1988.00 | 74.663  | 40412  | 3 | 663.34  | -7.25  |
| P64052 EFTS_SALTY Elongation factor Ts       | 4  | Carbamidomethyl+C(8) | TGAGMMDCKK                           | 15  | 10 | 7  | 57.98  | b2b4y2y3y4y5y7                                    | 1098.47 | 21.759  | 21798  | 2 | 549.74  | -4.67  |
| P64052 EFTS_SALTY Elongation factor Ts       | 5  |                      | VLDAAVAGK                            | 95  | 9  | 4  | 38.19  | y6y7y8y9                                          | 843.48  | 34.421  | 19724  | 2 | 422.24  | -14.40 |
| P64052 EFTS_SALTY Elongation factor Ts       | 6  |                      | DAGFQAFADK                           | 85  | 10 | 3  | 41.6   | y3y6y8                                            | 1069.50 | 54.646  | 8893   | 2 | 535.25  | 2.17   |
| P64052 EFTS_SALTY Elongation factor Ts       | 7  |                      | VETDFAAEVAAMSK                       | 267 | 14 | 7  | 58.49  | b4b5b10b12b13°b13y4                               | 1468.70 | 60.342  | 4624   | 3 | 490.24  | 1.91   |
| P64052 EFTS_SALTY Elongation factor Ts       | 8  |                      | VASLEGDVLGSYQHGAR                    | 134 | 17 | 18 | 144.97 | b3°b3b4°b4y3y4y5y7y8°y8*y8y10*y10y11*y11y12y13y15 | 1758.85 | 59.639  | 139748 | 3 | 586.95  | -17.07 |
| P64052 EFTS_SALTY Elongation factor Ts       | 9  |                      | IGVLVAAK                             | 151 | 8  | 3  | 36.02  | b3y3y7                                            | 770.50  | 47.822  | 49928  | 2 | 385.75  | -18.69 |
| P64052 EFTS_SALTY Elongation factor Ts       | 10 |                      | IGENINIR                             | 125 | 8  | 6  | 53.98  | y3y5y6°y6y7*y7                                    | 928.51  | 45.233  | 46170  | 2 | 464.76  | -15.38 |

|                                                                           |    |                                           |                                      |     |    |    |        |                             |         |         |        |   |         |        |
|---------------------------------------------------------------------------|----|-------------------------------------------|--------------------------------------|-----|----|----|--------|-----------------------------|---------|---------|--------|---|---------|--------|
| [P64052]EFTS_SALTY Elongation factor Ts                                   | 11 |                                           | EYQVQLDIAMQSGKPK                     | 193 | 16 | 5  | 28.25  | b5y4y7y8*y8                 | 1834.91 | 70.912  | 12309  | 3 | 612.31  | -15.70 |
| [P64052]EFTS_SALTY Elongation factor Ts                                   | 12 |                                           | ALTEANGDIELAIENMR                    | 25  | 17 | 4  | 22.84  | b5b11y5y13                  | 1859.91 | 60.878  | 11403  | 2 | 930.46  | -2.10  |
| [P64052]EFTS_SALTY Elongation factor Ts                                   | 13 |                                           | SVGQLLK                              | 240 | 7  | 5  | 37.37  | b5°b5*b5b6y5                | 744.45  | 45.586  | 7675   | 2 | 372.73  | -18.28 |
| [P64052]EFTS_SALTY Elongation factor Ts                                   | 14 |                                           | QLAMHVAASKPEFVKPEDVSADV<br>VEK       | 167 | 26 | 3  | 12.11  | b13y7y11                    | 2824.41 | 109.798 | 3579   | 3 | 942.14  | -15.99 |
| [P64052]EFTS_SALTY Elongation factor Ts                                   | 15 |                                           | MVEGR                                | 214 | 5  | 1  | 13.19  | y4                          | 591.30  | 39.043  | 3359   | 1 | 591.30  | 7.43   |
| [P64052]EFTS_SALTY Elongation factor Ts                                   | 16 |                                           | VALVAK                               | 119 | 6  | 2  | 26.79  | b4y5                        | 600.41  | 47.802  | 3030   | 1 | 600.41  | 3.86   |
| [P64052]EFTS_SALTY Elongation factor Ts                                   | 17 |                                           | FEVGEGIEK VETDFAAEVAAMSK             | 258 | 23 | 8  | 49.34  | b3b5b13y3y4y7y12y14         | 2457.18 | 106.179 | 45736  | 3 | 819.73  | -0.20  |
| [P64052]EFTS_SALTY Elongation factor Ts                                   | 18 |                                           | DAGFQAFADKVLDAAVAGK                  | 85  | 19 | 5  | 20.62  | b3b15*b15y6y15              | 1893.98 | 77.251  | 17676  | 3 | 632.00  | 3.29   |
| [P64052]EFTS_SALTY Elongation factor Ts                                   | 19 | Phosphoryl STY(12)                        | EYQVQLDIAMQSGKPK                     | 193 | 16 | 6  | 24.17  | b5°b5*b5b10y5y13            | 1914.90 | 68.573  | 60712  | 3 | 638.97  | 3.44   |
| [P64052]EFTS_SALTY Elongation factor Ts                                   | 20 | Oxidation+M(12)                           | VETDFAAEVAAMSK                       | 267 | 14 | 4  | 19.22  | b4y5y12°y12                 | 1484.70 | 77.725  | 13574  | 2 | 742.85  | 1.32   |
| [P64052]EFTS_SALTY Elongation factor Ts                                   | 21 | Oxidation+M(4)                            | QLAMHVAASKPEFVKPEDVSADV<br>VEK       | 167 | 26 | 5  | 15.73  | b5b11y9°y9y22               | 2840.47 | 101.254 | 3962   | 3 | 947.49  | 5.59   |
| [P64052]EFTS_SALTY Elongation factor Ts                                   | 22 |                                           | ITASLVK                              | 3   | 7  | 2  | 8.8    | b4°b4                       | 731.46  | 49.394  | 8655   | 1 | 731.46  | -14.60 |
| [P64052]EFTS_SALTY Elongation factor Ts                                   | 23 | Carbamidomethyl+C(7)                      | GAGMMDCKK                            | 16  | 9  | 0  | 2.04   |                             | 997.42  | 21.767  | 5897   | 2 | 499.21  | -6.49  |
| [P64052]EFTS_SALTY Elongation factor Ts                                   | 24 | Carbamidomethyl+C(6)                      | AGMMDCKK                             | 17  | 8  | 0  | 2.04   |                             | 940.40  | 21.740  | 2711   | 2 | 470.70  | -3.05  |
| [Q9L4T0]LUXS_SALTY S-ribosylhomocysteine lyase                            | 1  |                                           | TMNTPHGDITVFDLR                      | 23  | 16 | 11 | 60.06  | b1b2b3b10y2y3y4y6y10y11y16  | 1787.85 | 71.618  | 48892  | 3 | 596.62  | -13.79 |
| [Q9L4T0]LUXS_SALTY S-ribosylhomocysteine lyase                            | 2  | Carbamidomethyl+C(15)                     | VQDQNQIPELN VYQCGTYQMHS<br>LSEAQDIAR | 113 | 31 | 7  | 37.91  | b7b10y4y9y10y11y31          | 3635.71 | 75.435  | 22233  | 3 | 1212.57 | 5.71   |
| [Q9L4T0]LUXS_SALTY S-ribosylhomocysteine lyase                            | 3  | Carbamidomethyl+C(18)                     | DHLNGNGVEIIDISPMGCR                  | 65  | 19 | 5  | 36.2   | b2b11b12b13y13              | 2097.00 | 76.472  | 1504   | 2 | 1049.01 | 8.96   |
| [Q9L4T0]LUXS_SALTY S-ribosylhomocysteine lyase                            | 4  |                                           | PLLD SFAVDHTR                        | 1   | 12 | 3  | 35.43  | b8b9b10                     | 1370.69 | 53.269  | 1507   | 2 | 685.85  | -11.67 |
| [Q9L4T0]LUXS_SALTY S-ribosylhomocysteine lyase                            | 5  |                                           | VADAWKAAMADV LK                      | 99  | 14 | 3  | 27.79  | b3b8b12                     | 1488.79 | 90.641  | 232310 | 2 | 744.90  | -1.39  |
| [Q9L4T0]LUXS_SALTY S-ribosylhomocysteine lyase                            | 6  |                                           | TGFYMSLIGTPDEQ RVADAWK               | 84  | 21 | 5  | 21.62  | b4y4y9*y9y11                | 2385.14 | 85.842  | 3580   | 3 | 795.72  | -7.68  |
| [Q9L4T0]LUXS_SALTY S-ribosylhomocysteine lyase                            | 7  | Carbamidomethyl+C(18)                     | TMNTPHGDITVFDLRFCIPNK                | 23  | 22 | 6  | 18.1   | b5b10y5*y5y19°y19           | 2547.23 | 136.287 | 2388   | 2 | 1274.12 | -6.71  |
| [Q9L4T0]LUXS_SALTY S-ribosylhomocysteine lyase                            | 8  | Carbamidomethyl+C(15)<br>;Oxidation+M(20) | VQDQNQIPELN VYQCGTYQMHS<br>LSEAQDIAR | 113 | 31 | 6  | 38.35  | b4b5b12b13y6*y6             | 3651.72 | 99.884  | 7458   | 3 | 1217.91 | 10.56  |
| [Q9L4T0]LUXS_SALTY S-ribosylhomocysteine lyase                            | 9  | Carbamidomethyl+C(2);<br>Oxidation+M(9)   | FCIPNKEVMPEK                         | 39  | 12 | 3  | 35.43  | y3y4y5                      | 1507.73 | 47.476  | 2341   | 3 | 503.25  | 4.21   |
| [Q9L4T0]LUXS_SALTY S-ribosylhomocysteine lyase                            | 10 | Oxidation+M(2)                            | TMNTPHGDITVFDLR                      | 23  | 16 | 3  | 17.1   | b12y5y11                    | 1803.88 | 83.177  | 1542   | 2 | 902.45  | 8.53   |
| [Q9L4T0]LUXS_SALTY S-ribosylhomocysteine lyase                            | 11 |                                           | TMNTPHGDITVFDL                       | 23  | 15 | 0  | 4.48   |                             | 1631.78 | 71.624  | 2070   | 2 | 816.39  | 4.86   |
| [Q7CPK0]UGPB_SALTY sn-glycerol-3-phohate-binding periplasmic protein ugpB | 1  |                                           | TGYLPITTAAYELTR                      | 343 | 15 | 11 | 102.45 | b3b4y5y6y7y9°y9y10y11y12y15 | 1669.88 | 85.026  | 95487  | 2 | 835.44  | 1.10   |
| [Q7CPK0]UGPB_SALTY sn-glycerol-3-phohate-binding periplasmic protein ugpB | 2  |                                           | FLD FLAKPENAAEWHQK                   | 326 | 17 | 9  | 26.06  | b2b3y2y4*y4y6°y6y8y17       | 2044.02 | 74.062  | 47301  | 3 | 682.01  | -2.21  |

|                                                                          |    |                      |                          |     |    |   |       |                    |         |         |       |   |         |        |
|--------------------------------------------------------------------------|----|----------------------|--------------------------|-----|----|---|-------|--------------------|---------|---------|-------|---|---------|--------|
| Q7CPK0 UGPB_SALTY sn-glycerol-3-phohate-binding periplasmic protein ugpB | 3  |                      | LGNMPQIR                 | 389 | 8  | 5 | 49.21 | b6y4y5y7*y7        | 928.50  | 48.445  | 41818 | 2 | 464.75  | -8.15  |
| Q7CPK0 UGPB_SALTY sn-glycerol-3-phohate-binding periplasmic protein ugpB | 4  |                      | TGNAPAILQVYEVGTATMMASK   | 77  | 22 | 5 | 20.79 | b3y3y6y15y22       | 2253.15 | 94.131  | 26852 | 2 | 1127.08 | 10.19  |
| Q7CPK0 UGPB_SALTY sn-glycerol-3-phohate-binding periplasmic protein ugpB | 5  |                      | FNQANPDYK                | 47  | 9  | 8 | 38.19 | b2y2y4°y4y7*y7y8y9 | 1096.50 | 29.456  | 15745 | 2 | 548.75  | -3.56  |
| Q7CPK0 UGPB_SALTY sn-glycerol-3-phohate-binding periplasmic protein ugpB | 6  |                      | NNGFDGTDAVLEFNKPEQVK     | 212 | 20 | 6 | 45.41 | y5y10y12y16y18y20  | 2222.10 | 66.096  | 7248  | 2 | 1111.55 | 12.64  |
| Q7CPK0 UGPB_SALTY sn-glycerol-3-phohate-binding periplasmic protein ugpB | 7  |                      | SGHLLSQPFNSSTPVLYYNKDAFK | 132 | 24 | 3 | 12.67 | b9b16y6            | 2713.39 | 118.865 | 2125  | 3 | 905.13  | 9.72   |
| Q7CPK0 UGPB_SALTY sn-glycerol-3-phohate-binding periplasmic protein ugpB | 8  |                      | TGYLPITTAAYELTREQGYDDK   | 343 | 22 | 3 | 13.39 | b14y3y11           | 2553.22 | 85.578  | 1577  | 3 | 851.75  | -10.81 |
| Q7CPK0 UGPB_SALTY sn-glycerol-3-phohate-binding periplasmic protein ugpB | 9  |                      | QMLNKPPLPFTK             | 374 | 12 | 6 | 32.09 | b4*b4b9y4°y4y7     | 1413.76 | 61.972  | 53833 | 3 | 471.93  | -20.29 |
| Q7CPK0 UGPB_SALTY sn-glycerol-3-phohate-binding periplasmic protein ugpB | 10 |                      | TWQELADYTAK              | 167 | 11 | 6 | 41.4  | b3°b3b5*b5b7y8     | 1325.64 | 53.246  | 15892 | 2 | 663.32  | -1.47  |
| Q7CPK0 UGPB_SALTY sn-glycerol-3-phohate-binding periplasmic protein ugpB | 11 |                      | TIVDEELESVWTGK           | 397 | 14 | 3 | 27.79 | y3y7y12            | 1605.81 | 82.568  | 15224 | 2 | 803.41  | 5.17   |
| Q7CPK0 UGPB_SALTY sn-glycerol-3-phohate-binding periplasmic protein ugpB | 12 | Carbamidomethyl+C(6) | FYNGDCAMTTASSGLANIR      | 258 | 20 | 4 | 23.74 | y4y11y12°y12       | 2135.96 | 61.859  | 11859 | 2 | 1068.48 | 5.49   |
| Q7CPK0 UGPB_SALTY sn-glycerol-3-phohate-binding periplasmic protein ugpB | 13 |                      | GAPQNAIIGGASLWVMQGK      | 297 | 19 | 4 | 14.89 | b4b14*b14y9        | 1898.01 | 84.406  | 7490  | 2 | 949.51  | 6.43   |
| Q7CPK0 UGPB_SALTY sn-glycerol-3-phohate-binding periplasmic protein ugpB | 14 |                      | DAGINFDESQFVPTVAGYYTDAK  | 109 | 23 | 5 | 20.05 | b12y5°y5y8y12      | 2508.21 | 123.385 | 3880  | 3 | 836.74  | 20.05  |
| Q7CPK0 UGPB_SALTY sn-glycerol-3-phohate-binding periplasmic protein ugpB | 15 |                      | GNYEQNLSAGIAAFR          | 62  | 15 | 6 | 45.43 | b9b10°b10b11y4y11  | 1610.78 | 47.501  | 3453  | 2 | 805.89  | -9.47  |
| Q7CPK0 UGPB_SALTY sn-glycerol-3-phohate-binding periplasmic protein ugpB | 16 |                      | EVDSLAQR                 | 39  | 8  | 4 | 33.01 | b6y6*y6y7          | 917.49  | 69.050  | 2074  | 2 | 459.25  | 19.82  |
| Q7CPK0 UGPB_SALTY sn-glycerol-3-phohate-binding periplasmic protein ugpB | 17 |                      | AGLDPEQPPKTWQELADYTAK    | 157 | 21 | 5 | 26.64 | b4b15y11y14y17     | 2358.16 | 73.058  | 87781 | 3 | 786.72  | -2.07  |
| Q7CPK0 UGPB_SALTY sn-glycerol-3-phohate-binding periplasmic protein ugpB | 18 |                      | EQGYDKNPGADIATR          | 358 | 16 | 5 | 42.77 | y3y4°y4y8y9        | 1797.82 | 41.115  | 51211 | 3 | 599.94  | -11.88 |
| Q7CPK0 UGPB_SALTY sn-glycerol-3-phohate-binding periplasmic protein ugpB | 19 |                      | TPQQALDTAVDRGNQLLR       | 412 | 18 | 5 | 21.66 | b3°b3b12y3y12      | 1996.04 | 68.930  | 40178 | 3 | 666.02  | -7.95  |
| Q7CPK0 UGPB_SALTY sn-glycerol-3-phohate-binding periplasmic protein ugpB | 20 |                      | EVDSLAQRFNQANPDYK        | 39  | 17 | 3 | 16.26 | b7b13y8            | 1994.98 | 102.876 | 13978 | 2 | 997.99  | 11.38  |
| Q7CPK0 UGPB_SALTY sn-glycerol-3-phohate-binding periplasmic protein ugpB | 21 |                      | TWQELADYTAKLR            | 167 | 13 | 5 | 43.01 | b4b5°b5b6b9        | 1594.81 | 79.425  | 9500  | 2 | 797.91  | -9.03  |



|                                                                          |    |                       |                                                 |     |    |   |       |                          |         |         |       |   |         |        |
|--------------------------------------------------------------------------|----|-----------------------|-------------------------------------------------|-----|----|---|-------|--------------------------|---------|---------|-------|---|---------|--------|
| Q7CPK0 UGPB_SALTY sn-glycerol-3-phohate-binding periplasmic protein ugpB | 22 |                       | GNYEQNL\$AGIAAFRTGNAPAILQVYEVGTATMMASK          | 62  | 37 | 6 | 16.21 | b9b15y5°y5y10y13         | 3844.89 | 80.864  | 6369  | 6 | 641.66  | -1.52  |
| Q7CPK0 UGPB_SALTY sn-glycerol-3-phohate-binding periplasmic protein ugpB | 23 |                       | LGNMPQIRTIVDEELESVWTGK                          | 389 | 22 | 7 | 28.85 | b5b6b14y7°y7y16°y16      | 2515.29 | 62.642  | 2218  | 4 | 629.58  | 2.14   |
| Q7CPK0 UGPB_SALTY sn-glycerol-3-phohate-binding periplasmic protein ugpB | 24 | Phosphoryl.STY(8)     | TGYLPITTAAYELTREQGYDYK                          | 343 | 22 | 4 | 18.1  | b7b9y4y10                | 2633.20 | 51.474  | 3678  | 3 | 878.41  | -1.11  |
| Q7CPK0 UGPB_SALTY sn-glycerol-3-phohate-binding periplasmic protein ugpB | 25 | Oxidation+M()         | TGNAPAILQVYEVGTATMMASK                          | 77  | 22 | 5 | 20.79 | b5y4y13°y13y16           | 2269.13 | 69.611  | 53324 | 3 | 757.05  | 3.55   |
| Q7CPK0 UGPB_SALTY sn-glycerol-3-phohate-binding periplasmic protein ugpB | 26 | Oxidation+M(16)       | GAPQNAIIGGASLWVMQGKDK                           | 297 | 21 | 3 | 13.83 | b4y6y10                  | 2157.13 | 65.868  | 2829  | 3 | 719.71  | 7.24   |
| P0A1P6 GLNA_SALTY Glutamine synthetase                                   | 1  |                       | AINALANPTTNSYKR                                 | 307 | 15 | 5 | 26.16 | y5y8°y8y9*y9             | 1633.86 | 43.539  | 29961 | 3 | 545.29  | -5.16  |
| P0A1P6 GLNA_SALTY Glutamine synthetase                                   | 2  |                       | LVPGYEAPVMLAYSAR                                | 322 | 16 | 7 | 52.99 | b15y2y4y5y9y13y14        | 1736.91 | 77.897  | 27518 | 2 | 868.96  | 2.11   |
| P0A1P6 GLNA_SALTY Glutamine synthetase                                   | 3  |                       | GGYFPVPPVDSAQDIR                                | 177 | 16 | 7 | 44.83 | b3b13y2y4y7y11y12        | 1717.86 | 70.501  | 12474 | 2 | 859.43  | 4.19   |
| P0A1P6 GLNA_SALTY Glutamine synthetase                                   | 4  |                       | MSAEHVLTMLNEHEVK                                | 0   | 16 | 5 | 24.17 | b7b12°b12y9y11           | 1867.91 | 87.832  | 6738  | 2 | 934.46  | 1.05   |
| P0A1P6 GLNA_SALTY Glutamine synthetase                                   | 5  |                       | ATGIADTVLFGPEPEFFLFDDIR                         | 117 | 23 | 8 | 29.37 | b3°b3b4b8°b8b14y2y6      | 2570.28 | 117.132 | 4033  | 3 | 857.43  | 0.19   |
| P0A1P6 GLNA_SALTY Glutamine synthetase                                   | 6  | Carbamidomethyl+C(11) | FPDPAANPYLCFAALLMAGLDGIK                        | 360 | 24 | 4 | 23.36 | b6b9b10y4                | 2565.32 | 108.405 | 2252  | 3 | 855.78  | 10.75  |
| P0A1P6 GLNA_SALTY Glutamine synthetase                                   | 7  | Carbamidomethyl+C(1)  | CDILEPGTLQGYDR                                  | 89  | 14 | 4 | 19.22 | b4b9°b9y7                | 1636.78 | 71.442  | 1823  | 3 | 546.27  | 10.44  |
| P0A1P6 GLNA_SALTY Glutamine synthetase                                   | 8  |                       | AGGVFTDEAIDAYIALR                               | 430 | 17 | 3 | 23.25 | b5y11y12                 | 1781.88 | 76.802  | 62637 | 2 | 891.44  | -16.17 |
| P0A1P6 GLNA_SALTY Glutamine synthetase                                   | 9  |                       | FNTMTK                                          | 225 | 6  | 2 | 26.79 | b4y3                     | 741.35  | 66.000  | 21194 | 1 | 741.35  | -7.66  |
| P0A1P6 GLNA_SALTY Glutamine synthetase                                   | 10 |                       | NLYDLPPEEAK                                     | 395 | 11 | 3 | 24.23 | b5b7y8                   | 1288.65 | 45.157  | 6076  | 3 | 430.22  | 3.98   |
| P0A1P6 GLNA_SALTY Glutamine synthetase                                   | 11 |                       | AINALANPTTNSYK                                  | 307 | 14 | 4 | 32.92 | b9b10y6y9                | 1477.76 | 48.687  | 5890  | 2 | 739.38  | -1.65  |
| P0A1P6 GLNA_SALTY Glutamine synthetase                                   | 12 |                       | GINESDMVLPDASTAVIDPFFADSTLIIR                   | 59  | 30 | 5 | 24.67 | b4b9b10y6y11             | 3238.63 | 113.448 | 5302  | 3 | 1080.21 | 7.76   |
| P0A1P6 GLNA_SALTY Glutamine synthetase                                   | 13 |                       | SAEHVLTMLNEHEVK                                 | 1   | 15 | 5 | 29.35 | b5°b5b7b11y5             | 1736.83 | 60.919  | 2915  | 2 | 868.92  | -16.87 |
| P0A1P6 GLNA_SALTY Glutamine synthetase                                   | 14 |                       | MTPHPVEFELYYSV                                  | 455 | 14 | 4 | 19.22 | b4b6y3°y3                | 1711.82 | 37.159  | 2627  | 3 | 571.28  | 12.05  |
| P0A1P6 GLNA_SALTY Glutamine synthetase                                   | 15 |                       | YAGLSEQALYYIGGVIK                               | 287 | 17 | 6 | 33.63 | b4b7°b7b9°b9b10          | 1845.02 | 130.043 | 2156  | 2 | 923.01  | 21.24  |
| P0A1P6 GLNA_SALTY Glutamine synthetase                                   | 16 |                       | IHPGEAMDKNLYDLPPEEAK                            | 386 | 20 | 3 | 14.32 | b6b12y8                  | 2267.12 | 98.768  | 76658 | 3 | 756.38  | 9.15   |
| P0A1P6 GLNA_SALTY Glutamine synthetase                                   | 17 |                       | ATGIADTVLFGPEPEFFLFDDIRFGASISGSHVAIDDIEGAWNSSTK | 117 | 47 | 9 | 35.97 | b4°b4y6y8y9°y9y10*y10y17 | 5000.39 | 69.527  | 22616 | 6 | 834.24  | -6.93  |
| P0A1P6 GLNA_SALTY Glutamine synthetase                                   | 18 |                       | NGTNLFSGDKYAGLSEQALYYIGGVIK                     | 277 | 27 | 4 | 17.95 | b5°b5b12b14              | 2878.47 | 111.240 | 9250  | 3 | 960.16  | 3.14   |
| P0A1P6 GLNA_SALTY Glutamine synthetase                                   | 19 |                       | GKEQHVTIPAHQVNAEFFEFGK                          | 26  | 22 | 4 | 29.67 | y3y5y12y15               | 2495.27 | 101.733 | 4259  | 2 | 1248.14 | 13.80  |
| P0A1P6 GLNA_SALTY Glutamine synthetase                                   | 20 | Phosphoryl STY(13)    | LVPGYEAPVMLAYSAR                                | 322 | 16 | 6 | 44.83 | b9b11b13b14y3y10         | 1816.85 | 58.468  | 3809  | 3 | 606.29  | -5.85  |
| P0A1P6 GLNA_SALTY Glutamine synthetase                                   | 21 | Oxidation+M(1)        | MSAEHVLTMLNEHEVK                                | 0   | 16 | 5 | 30.7  | b11°b11b12y6y12          | 1883.91 | 82.750  | 22689 | 2 | 942.46  | 8.16   |

|                                                              |    |                       |                                            |     |    |    |       |                                                |         |         |        |   |         |        |
|--------------------------------------------------------------|----|-----------------------|--------------------------------------------|-----|----|----|-------|------------------------------------------------|---------|---------|--------|---|---------|--------|
| P0A1P6 GLNA_SALTY Glutamine synthetase                       | 22 | Oxidation+M(8)        | SAEHVLTMLNEHEVK                            | 1   | 15 | 4  | 29.35 | b3b5b9y6                                       | 1752.84 | 82.782  | 3520   | 3 | 584.95  | -10.59 |
| P0A1P6 GLNA_SALTY Glutamine synthetase                       | 23 |                       | NALANPTTNSYKR                              | 309 | 13 | 0  | 4.07  |                                                | 1449.73 | 43.529  | 3110   | 2 | 725.37  | -8.25  |
| Q8ZQD4 LOLA_SALTY Outer-membrane lipoprotein carrier protein | 1  |                       | DGTIHQFSAVEQDDQR                           | 154 | 16 | 7  | 27.58 | b9*b9y3°y3y5y9y16                              | 1845.85 | 45.115  | 36017  | 3 | 615.96  | 9.19   |
| Q8ZQD4 LOLA_SALTY Outer-membrane lipoprotein carrier protein | 2  |                       | TLWFYNPFVEQATATWLK                         | 85  | 18 | 13 | 94.15 | b3b4b5b6b7*b7b14y2y5y12y13y16y18               | 2215.15 | 115.936 | 24882  | 2 | 1108.08 | 13.34  |
| Q8ZQD4 LOLA_SALTY Outer-membrane lipoprotein carrier protein | 3  |                       | FTFTPPQGVTTIDDQR                           | 187 | 15 | 5  | 25.7  | b5b9y6y10y15                                   | 1721.87 | 64.455  | 13284  | 3 | 574.63  | 11.06  |
| Q8ZQD4 LOLA_SALTY Outer-membrane lipoprotein carrier protein | 4  |                       | VTDGSGAAVQEGQGDLWVKRPN LFNWHMTQPDESILVSDGK | 44  | 41 | 3  | 38.91 | b3b4b5                                         | 4482.20 | 83.424  | 8588   | 4 | 1121.31 | 5.23   |
| Q8ZQD4 LOLA_SALTY Outer-membrane lipoprotein carrier protein | 5  |                       | TLWFYNPFVEQATATWLKDATG NTPFMILIAR          | 85  | 31 | 8  | 37.96 | b4b5°b5b6*b6y5y11y31                           | 3602.84 | 129.266 | 8365   | 3 | 1201.62 | 7.12   |
| Q8ZQD4 LOLA_SALTY Outer-membrane lipoprotein carrier protein | 6  |                       | VTDGSGAAVQEGQGDWVK                         | 44  | 19 | 4  | 14.89 | b5°b5b13y7                                     | 1916.95 | 58.001  | 8028   | 2 | 958.98  | 5.92   |
| Q8ZQD4 LOLA_SALTY Outer-membrane lipoprotein carrier protein | 7  |                       | RPNLFNWHMTQPDESILVSDGK                     | 63  | 22 | 3  | 13.39 | b11y6y12                                       | 2584.23 | 77.997  | 10804  | 3 | 862.08  | -12.00 |
| Q8ZQD4 LOLA_SALTY Outer-membrane lipoprotein carrier protein | 8  |                       | ASNGNLK                                    | 139 | 7  | 6  | 40.38 | b3b5°b5y6°y6*y6                                | 703.38  | 29.682  | 4071   | 1 | 703.38  | 12.58  |
| Q8ZQD4 LOLA_SALTY Outer-membrane lipoprotein carrier protein | 9  |                       | VSSFHATFTQK                                | 33  | 11 | 3  | 24.23 | b6b10y8                                        | 1252.61 | 56.053  | 3667   | 2 | 626.81  | -17.35 |
| Q8ZQD4 LOLA_SALTY Outer-membrane lipoprotein carrier protein | 10 |                       | NQASDWQQYNIKQDGDNFVLTP K                   | 116 | 23 | 5  | 24.46 | b3b21y9y12y20                                  | 2709.30 | 68.484  | 76068  | 3 | 903.77  | 2.88   |
| Q8ZQD4 LOLA_SALTY Outer-membrane lipoprotein carrier protein | 11 |                       | SQQNGAVDPSKFTFTPPQGVTTIDD QR               | 176 | 26 | 8  | 37.01 | b5b6b14y5°y5y6°y6y10                           | 2833.41 | 86.850  | 2292   | 2 | 1417.21 | 13.79  |
| Q8ZQD4 LOLA_SALTY Outer-membrane lipoprotein carrier protein | 12 |                       | SAYQLKSQQNGAVDPSK                          | 170 | 17 | 3  | 16.26 | b10y5y12                                       | 1820.89 | 87.199  | 1858   | 4 | 455.98  | -12.60 |
| Q8ZP65 TPX_SALTY Probable thiol peroxidase                   | 1  |                       | SQTVHFQGNPVTVANVIPQAGSK                    | 1   | 23 | 17 | 62.23 | b2°b2b7°b7b9b11y4y6°y6*y6y7y9y10*y10y12*y12y23 | 2379.23 | 65.142  | 133920 | 3 | 793.75  | -5.03  |
| Q8ZP65 TPX_SALTY Probable thiol peroxidase                   | 2  | Carbamidomethyl+C(13) | VLNIFPSIDTGVCAASVR                         | 48  | 18 | 7  | 29.06 | b2b3b5y2y13y14y18                              | 1919.02 | 85.340  | 64780  | 2 | 960.01  | 5.34   |
| Q8ZP65 TPX_SALTY Probable thiol peroxidase                   | 3  |                       | AQAFTLVAK                                  | 24  | 9  | 7  | 59.8  | b3b4b5y2y3y7y9                                 | 948.54  | 53.948  | 56764  | 2 | 474.77  | -12.74 |
| Q8ZP65 TPX_SALTY Probable thiol peroxidase                   | 4  | Carbamidomethyl+C(2)  | FCGAEGLSNVITLSTLR                          | 93  | 17 | 12 | 52.41 | b2b3b11*b11b13b14°b14y4y6y15*y15y17            | 1837.96 | 86.166  | 36471  | 2 | 919.48  | 6.91   |
| Q8ZP65 TPX_SALTY Probable thiol peroxidase                   | 5  |                       | DLSDVSLSQYAGK                              | 33  | 13 | 5  | 20.57 | b2b5b8y1y12                                    | 1382.68 | 60.092  | 33355  | 2 | 691.84  | -0.09  |
| Q8ZP65 TPX_SALTY Probable thiol peroxidase                   | 6  |                       | DLSDVSLSQYAGKR                             | 33  | 14 | 10 | 38.91 | b2°b2b4b11*b11b12°b12y7*y7y9                   | 1538.78 | 55.638  | 9082   | 2 | 769.89  | -2.06  |
| Q8ZP65 TPX_SALTY Probable thiol peroxidase                   | 7  |                       | AVIVLDENDNVIFSQVLVDEITHEPD YDAALNVLK       | 133 | 34 | 3  | 22.28 | b31y12y13                                      | 3811.96 | 118.318 | 3889   | 3 | 1271.32 | 8.33   |
| Q8ZP65 TPX_SALTY Probable thiol peroxidase                   | 8  | Carbamidomethyl+C(15) | FNQLATEVENTVVLCSADLPFA QSR                 | 67  | 26 | 6  | 15.73 | b5b7y4°y4y11°y11                               | 2908.42 | 102.829 | 1760   | 3 | 970.14  | -10.74 |

|                                                                               |    |                       |                                                    |     |    |    |        |                                                           |         |         |       |   |         |        |
|-------------------------------------------------------------------------------|----|-----------------------|----------------------------------------------------|-----|----|----|--------|-----------------------------------------------------------|---------|---------|-------|---|---------|--------|
| Q8ZP65 TPX_SALTY Probable thiol peroxidase                                    | 9  |                       | AVIVLDENDNVIFSQLVDEITHEPDYDAALNVLKA                | 133 | 35 | 21 | 150.54 | b3b4b5b8b10*b10b11°b11y3y5y6y7y12y13y16y19y20y22y24y30y31 | 3883.01 | 120.081 | 77860 | 3 | 1295.01 | 10.81  |
| Q8ZP65 TPX_SALTY Probable thiol peroxidase                                    | 10 |                       | SQTVHFQGNPV                                        | 1   | 11 | 4  | 21.4   | y9°y9*y9y10                                               | 1213.60 | 65.085  | 1639  | 2 | 607.31  | 5.83   |
| P26976 PHON_SALTY Non-ecific acid phohatase                                   | 1  |                       | NGSYPSGHTAYGTLLALVLSEARPER                         | 150 | 26 | 11 | 18.22  | b2*b2b3°b3y1y2y3°y3y8y2y26                                | 2759.38 | 96.357  | 57229 | 4 | 690.60  | -12.30 |
| P26976 PHON_SALTY Non-ecific acid phohatase                                   | 2  |                       | IFSPVVGAK                                          | 85  | 9  | 7  | 61.56  | b2b3y3y6y7y8y9                                            | 917.54  | 51.875  | 40284 | 2 | 459.27  | -9.98  |
| P26976 PHON_SALTY Non-ecific acid phohatase                                   | 3  |                       | NLLTMGGYYATASAK                                    | 108 | 15 | 4  | 24.1   | b10y12y13°y13                                             | 1560.77 | 70.319  | 39387 | 2 | 780.89  | 0.78   |
| P26976 PHON_SALTY Non-ecific acid phohatase                                   | 4  |                       | LQTIPAFQK                                          | 215 | 9  | 6  | 45.97  | b2*b2y3y5y7y9                                             | 1045.60 | 55.801  | 38738 | 2 | 523.30  | -7.71  |
| P26976 PHON_SALTY Non-ecific acid phohatase                                   | 5  |                       | QAAEDADVSVENIAR                                    | 70  | 15 | 10 | 63.48  | b3b8b10*b10b13°b13y4y9y10y15                              | 1587.76 | 51.390  | 7982  | 2 | 794.38  | 1.00   |
| P26976 PHON_SALTY Non-ecific acid phohatase                                   | 6  | Carbamidomethyl+C(3)  | VICGAHWQSDVDAGR                                    | 191 | 15 | 3  | 18.08  | b8y3y5                                                    | 1670.77 | 46.090  | 4504  | 2 | 835.89  | 0.80   |
| P26976 PHON_SALTY Non-ecific acid phohatase                                   | 7  |                       | INPK                                               | 94  | 4  | 1  | 12.78  | y3                                                        | 471.29  | 70.498  | 12545 | 1 | 471.29  | -13.92 |
| P26976 PHON_SALTY Non-ecific acid phohatase                                   | 8  | Carbamidomethyl+C(12) | TRPFVLFNHSTCRPEDENTLR                              | 128 | 21 | 3  | 23.48  | y8y11y12                                                  | 2589.30 | 90.602  | 8383  | 3 | 863.77  | 15.09  |
| P26976 PHON_SALTY Non-ecific acid phohatase                                   | 9  |                       | EELNDK                                             | 230 | 6  | 1  | 13.6   | y5                                                        | 747.35  | 33.815  | 1507  | 1 | 747.35  | 2.37   |
| P26976 PHON_SALTY Non-ecific acid phohatase                                   | 10 |                       | DTPETWNMLKNLLTMGGYYATASAK                          | 98  | 25 | 4  | 23.03  | b4y9y10y17                                                | 2776.30 | 93.811  | 18685 | 2 | 1388.65 | -12.05 |
| P26976 PHON_SALTY Non-ecific acid phohatase                                   | 11 |                       | NNLSKEDHPK                                         | 236 | 11 | 3  | 24.23  | b10y5y7                                                   | 1294.66 | 48.938  | 11581 | 2 | 647.83  | -12.35 |
| P26976 PHON_SALTY Non-ecific acid phohatase                                   | 12 |                       | RGWEFGQSR                                          | 182 | 9  | 6  | 54.39  | b4b5°b5b6°b6b7                                            | 1122.53 | 97.874  | 4621  | 1 | 1122.53 | -10.00 |
| P26976 PHON_SALTY Non-ecific acid phohatase                                   | 13 |                       | WKQAAEDADVSVENIAR                                  | 68  | 17 | 4  | 16.26  | b7°b7b15y13                                               | 1901.95 | 73.339  | 2188  | 3 | 634.66  | 9.50   |
| P26976 PHON_SALTY Non-ecific acid phohatase                                   | 14 | Oxidation+M(5)        | NLLTMGGYYATASAKK                                   | 108 | 16 | 3  | 17.1   | b8b12y10                                                  | 1704.88 | 64.557  | 11303 | 3 | 568.96  | 8.74   |
| P26976 PHON_SALTY Non-ecific acid phohatase                                   | 15 | Oxidation+M(12)       | INPKDTPETWNMLK                                     | 94  | 14 | 3  | 19.22  | b11y5y10                                                  | 1702.83 | 100.870 | 2186  | 2 | 851.92  | -11.90 |
| P26976 PHON_SALTY Non-ecific acid phohatase                                   | 16 |                       | IFSPVVGAK                                          | 85  | 9  | 0  | 1.63   |                                                           | 899.53  | 51.869  | 4016  | 2 | 450.27  | -0.34  |
| P69936 YDFG_SALTY NADP-dependent L-serine/L-allo-threonine dehydrogenase ydfG | 1  |                       | VTDIEPGLVGGTEFSSVR                                 | 171 | 18 | 7  | 55.41  | b5b13y5y6y7y9y13                                          | 1862.95 | 69.692  | 24596 | 2 | 931.98  | 2.56   |
| P69936 YDFG_SALTY NADP-dependent L-serine/L-allo-threonine dehydrogenase ydfG | 2  |                       | AAIEEMMASLPAQWR                                    | 58  | 15 | 7  | 36.97  | b4°b4b13b15y4y5y11                                        | 1703.85 | 90.666  | 10205 | 2 | 852.43  | 12.25  |
| P69936 YDFG_SALTY NADP-dependent L-serine/L-allo-threonine dehydrogenase ydfG | 3  |                       | TYENTTALTPEDITEAVVWWVATLPAHVNIINTVEMMPVTQSFAGLSVHR | 199 | 48 | 9  | 35.93  | b2b5b8b9b13°b13b14y21y48                                  | 5340.63 | 136.426 | 5615  | 4 | 1335.91 | -1.28  |
| P69936 YDFG_SALTY NADP-dependent L-serine/L-allo-threonine dehydrogenase ydfG | 4  |                       | GHIINIGSTAGSWPYAGGNVYGATK                          | 126 | 25 | 3  | 12.37  | b13y9y19                                                  | 2491.24 | 65.310  | 50581 | 4 | 623.57  | 2.25   |
| P69936 YDFG_SALTY NADP-dependent L-serine/L-allo-threonine dehydrogenase ydfG | 5  |                       | ASVEDWETMIDTNNK                                    | 93  | 15 | 3  | 18.08  | b4b7y8                                                    | 1752.81 | 72.469  | 5917  | 2 | 876.91  | 17.48  |
| P69936 YDFG_SALTY NADP-dependent L-serine/L-allo-threonine dehydrogenase ydfG | 6  | Oxidation+M()         | AAIEEMMASLPAQWR                                    | 58  | 15 | 4  | 18.08  | b5y8y10°y10                                               | 1719.84 | 93.714  | 23926 | 2 | 860.42  | 10.08  |
| P69936 YDFG_SALTY NADP-dependent L-serine/L-allo-threonine dehydrogenase ydfG | 7  | Oxidation+M(9)        | ASVEDWETMIDTNNK                                    | 93  | 15 | 3  | 26.16  | y4y5y7                                                    | 1768.76 | 35.172  | 8296  | 4 | 442.94  | -8.01  |

|                                                                               |    |                                          |                                       |     |    |    |        |                                                                                               |         |         |        |   |         |        |
|-------------------------------------------------------------------------------|----|------------------------------------------|---------------------------------------|-----|----|----|--------|-----------------------------------------------------------------------------------------------|---------|---------|--------|---|---------|--------|
| P69936 YDFG_SALTY NADP-dependent L-serine/L-allo-threonine dehydrogenase ydfG | 8  | Carbamidomethyl+C(15)<br>;Oxidation+M(1) | MIVLVTGATAGFGECIAR                    | 0   | 18 | 5  | 21.66  | b3b13y5°y5y11                                                                                 | 1881.94 | 81.890  | 3374   | 2 | 941.47  | -10.96 |
| P69936 YDFG_SALTY NADP-dependent L-serine/L-allo-threonine dehydrogenase ydfG | 9  | Oxidation+M()                            | AAIEEMMASLPAQWRDIDLNN<br>AGLALGLEPAHK | 58  | 35 | 5  | 39.24  | b3b4b10b11b13                                                                                 | 3759.92 | 136.364 | 2664   | 3 | 1253.98 | -0.06  |
| P66955 TALB_SALTY Transaldolase B                                             | 1  | Carbamidomethyl+C(5)                     | EGINCNLTLFSFAQAR                      | 148 | 17 | 6  | 33.89  | b9°b9b10b13y3y16                                                                              | 1953.98 | 75.146  | 75102  | 2 | 977.49  | -4.12  |
| P66955 TALB_SALTY Transaldolase B                                             | 2  |                                          | ELAESEGAIER                           | 250 | 11 | 6  | 41.4   | b9°b9y7y8y9y11                                                                                | 1203.59 | 51.503  | 35519  | 2 | 602.30  | 5.17   |
| P66955 TALB_SALTY Transaldolase B                                             | 3  |                                          | LSYDTEASIAK                           | 100 | 11 | 4  | 35.99  | y8y9y10y11                                                                                    | 1197.59 | 45.107  | 13598  | 2 | 599.30  | -5.30  |
| P66955 TALB_SALTY Transaldolase B                                             | 4  |                                          | ISTEVDAR                              | 92  | 8  | 5  | 40.79  | y2y3y6y7y8                                                                                    | 890.45  | 28.910  | 13574  | 2 | 445.73  | -14.12 |
| P66955 TALB_SALTY Transaldolase B                                             | 5  |                                          | QHGYETVVMGASFR                        | 214 | 14 | 5  | 19.22  | b7y5°y5y9y14                                                                                  | 1581.76 | 56.660  | 10979  | 2 | 791.38  | 5.63   |
| P66955 TALB_SALTY Transaldolase B                                             | 6  | Carbamidomethyl+C(11)                    | NVGEILELAGCDR                         | 228 | 13 | 6  | 34.34  | b3b7y2y11y12y13                                                                               | 1445.73 | 74.301  | 10285  | 2 | 723.37  | 13.76  |
| P66955 TALB_SALTY Transaldolase B                                             | 7  |                                          | LYNDAGISNDR                           | 117 | 11 | 7  | 64.77  | b5b8b9y3y7y10y11                                                                              | 1237.59 | 80.251  | 6798   | 3 | 413.20  | 6.41   |
| P66955 TALB_SALTY Transaldolase B                                             | 8  |                                          | LASTWQGIR                             | 132 | 9  | 6  | 59.8   | b5b6b7y3y5*y5                                                                                 | 1031.57 | 59.441  | 5176   | 2 | 516.29  | 8.64   |
| P66955 TALB_SALTY Transaldolase B                                             | 9  |                                          | QFTTVVADTGDIAAMK                      | 9   | 16 | 3  | 17.1   | b10y6y11                                                                                      | 1667.81 | 59.419  | 1780   | 2 | 834.41  | -11.34 |
| P66955 TALB_SALTY Transaldolase B                                             | 10 |                                          | LIDDAVAWAKQSSDR                       | 50  | 16 | 3  | 17.1   | b5y11y13                                                                                      | 1802.90 | 79.044  | 60090  | 3 | 601.64  | -2.91  |
| P66955 TALB_SALTY Transaldolase B                                             | 11 |                                          | LSFSGEVKARPER                         | 262 | 13 | 4  | 20.57  | b6y4°y4y8                                                                                     | 1475.79 | 49.773  | 29299  | 2 | 738.40  | -7.20  |
| P66955 TALB_SALTY Transaldolase B                                             | 12 | Oxidation+M(15)                          | ITEAEFLWQHHQDPMAYDK                   | 275 | 19 | 3  | 22.67  | b7y4y5                                                                                        | 2311.06 | 47.757  | 1930   | 4 | 578.52  | -10.14 |
| P66955 TALB_SALTY Transaldolase B                                             | 13 |                                          | STEVDAR                               | 93  | 7  | 0  | 1.22   |                                                                                               | 777.38  | 28.892  | 1646   | 1 | 777.38  | 5.42   |
| P0AA07 PTHP_SALTY Phohocarrier protein HPr                                    | 1  |                                          | MFQQEVTITAPNGLHTRPAAQFV<br>K          | 0   | 24 | 14 | 89.77  | b2b3b7b10y1y10y12y13y1<br>4y16y18y19y20y24                                                    | 2684.36 | 63.894  | 393612 | 4 | 671.84  | -14.82 |
| P0AA07 PTHP_SALTY Phohocarrier protein HPr                                    | 2  |                                          | GFTSEITVTSNGK                         | 27  | 13 | 10 | 67.8   | b4b6°b6b10y5°y5y8y9y11<br>y13                                                                 | 1340.67 | 51.308  | 20442  | 2 | 670.84  | 0.27   |
| P0AA07 PTHP_SALTY Phohocarrier protein HPr                                    | 3  |                                          | LMAELE                                | 79  | 6  | 5  | 53.17  | b3b4b5°b5y4                                                                                   | 705.34  | 54.888  | 191139 | 1 | 705.34  | -11.60 |
| P0AA07 PTHP_SALTY Phohocarrier protein HPr                                    | 4  |                                          | LQTLGLTQGTVVTTISAEGEDEQKA<br>VEHLVK   | 49  | 30 | 28 | 185.32 | b3°b3*b3b4°b4b5°b5*b5b6<br>°b6b11*b11b25y3y8y11y1<br>3°y13*y13y14y15y16y17y1<br>8y19y20y22y28 | 3193.67 | 81.464  | 509618 | 4 | 799.17  | -7.87  |
| P0A6B1 ACP_SALTY Acyl carrier protein                                         | 1  |                                          | IIGEQLGVK                             | 10  | 9  | 10 | 64.57  | b2b8y1y3y4y7*y7y8*y8y9                                                                        | 956.57  | 49.805  | 86972  | 2 | 478.79  | -9.95  |
| P0A6B1 ACP_SALTY Acyl carrier protein                                         | 2  |                                          | ITTVQAAIDYINGHQA                      | 62  | 16 | 8  | 59.98  | b13°b13y4y6y8y11°y11y1<br>4                                                                   | 1714.88 | 82.647  | 20845  | 2 | 857.94  | 3.35   |
| P0A7X0 RS8_SALTY 30S ribosomal protein S8                                     | 1  |                                          | SMQDPIADMLTR                          | 1   | 12 | 11 | 83.72  | b2b4y3y4y6°y6y8y9y10°y1<br>0y12                                                               | 1377.65 | 78.495  | 105176 | 2 | 689.33  | -2.48  |
| P0A7X0 RS8_SALTY 30S ribosomal protein S8                                     | 2  |                                          | AVVESIQR                              | 69  | 8  | 13 | 49.21  | b2b5y2*y2y4°y4*y4y5°y5*<br>y5y6*y6y8                                                          | 901.50  | 33.502  | 67480  | 2 | 451.25  | -13.47 |
| P0A7X0 RS8_SALTY 30S ribosomal protein S8                                     | 3  | Carbamidomethyl+C(10)                    | QAGLGGEIICYVA                         | 117 | 13 | 3  | 29.82  | b3b5b8                                                                                        | 1350.67 | 81.362  | 4347   | 1 | 1350.67 | -2.26  |
| P0A7X0 RS8_SALTY 30S ribosomal protein S8                                     | 4  | Oxidation+M(5)                           | AAVTMPSSK                             | 22  | 9  | 3  | 30.41  | b5b8y4                                                                                        | 907.45  | 106.512 | 2648   | 1 | 907.45  | -3.63  |
| P67617 FETP_SALTY Probable Fe(2+)-trafficking protein                         | 1  |                                          | LLEQEMVSFLFEGK                        | 64  | 14 | 7  | 19.22  | b5°b5b7°b7°b7y1y10                                                                            | 1669.87 | 101.289 | 31428  | 2 | 835.44  | 9.21   |

|                                                              |    |                      |                                              |     |    |   |       |                           |         |         |       |   |         |        |
|--------------------------------------------------------------|----|----------------------|----------------------------------------------|-----|----|---|-------|---------------------------|---------|---------|-------|---|---------|--------|
| P67617 FETP_SALTY Probable Fe(2+)-trafficking protein        | 2  | Carbamidomethyl+C(4) | TIFCTYLQRDAEGQDFQLYPGELGK                    | 3   | 25 | 5 | 18.77 | b7b11*b11b13y7            | 2949.41 | 136.400 | 4168  | 2 | 1475.21 | 1.66   |
| P67617 FETP_SALTY Probable Fe(2+)-trafficking protein        | 3  | Carbamidomethyl+C(4) | TIFCTYLQR                                    | 3   | 9  | 3 | 30.41 | b6y7y8                    | 1201.59 | 62.056  | 1944  | 2 | 601.30  | -8.03  |
| P67617 FETP_SALTY Probable Fe(2+)-trafficking protein        | 4  |                      | IYNEISK                                      | 29  | 7  | 4 | 40.38 | y3y4y6*y6                 | 866.45  | 39.668  | 10076 | 2 | 433.73  | -9.44  |
| P67617 FETP_SALTY Probable Fe(2+)-trafficking protein        | 5  |                      | DAWAQWQHK                                    | 36  | 9  | 4 | 38.19 | b4°b4b6b7                 | 1169.57 | 60.119  | 1831  | 2 | 585.29  | 16.39  |
| P67617 FETP_SALTY Probable Fe(2+)-trafficking protein        | 6  |                      | IYNEISKDAWAQWQHK                             | 29  | 16 | 4 | 17.1  | b9°b9y4y7                 | 2016.97 | 96.425  | 1508  | 3 | 672.99  | -13.31 |
| P67617 FETP_SALTY Probable Fe(2+)-trafficking protein        | 7  | Oxidation+M(6)       | LLEQEMVSFLFEGKDVHIEGYTPEDK                   | 64  | 26 | 3 | 22.78 | y5y6y9                    | 3069.46 | 102.277 | 2298  | 5 | 614.70  | -4.69  |
| Q7CR87 SURA_SALTY Chaperone surA                             | 1  |                      | IQELPGIFAQALSTAK                             | 235 | 16 | 9 | 30.7  | b2b3°b3*b3b4*b4y12y14y16  | 1686.94 | 90.006  | 60023 | 2 | 843.98  | 1.01   |
| Q7CR87 SURA_SALTY Chaperone surA                             | 2  |                      | ITDEQLDQAIANIAK                              | 90  | 15 | 5 | 25.7  | b9b14y5y13y15             | 1642.87 | 80.577  | 50752 | 2 | 821.94  | 3.94   |
| Q7CR87 SURA_SALTY Chaperone surA                             | 3  |                      | LAYDGLNYSTYR                                 | 117 | 12 | 5 | 22.21 | b8°b8y4y10y12             | 1435.69 | 59.245  | 44904 | 2 | 718.35  | 3.49   |
| Q7CR87 SURA_SALTY Chaperone surA                             | 4  |                      | LIMDQIILQMGQK                                | 73  | 13 | 5 | 32.21 | b5y3y5*y5y6               | 1530.84 | 88.139  | 37033 | 2 | 765.92  | 0.96   |
| Q7CR87 SURA_SALTY Chaperone surA                             | 5  |                      | LNAGQAGQQLPDDATLR                            | 50  | 17 | 6 | 33.63 | y2y5y7y11y12y17           | 1767.91 | 51.653  | 33616 | 2 | 884.46  | 6.70   |
| Q7CR87 SURA_SALTY Chaperone surA                             | 6  |                      | QIGTQNDASTELNLSHILALPENPTSEQVNDAQR           | 162 | 35 | 8 | 50.03 | b2*b2y4y5y6y12y13y35      | 3816.94 | 88.786  | 23487 | 3 | 1272.98 | 10.11  |
| Q7CR87 SURA_SALTY Chaperone surA                             | 7  |                      | GQSQSISVTEVHAR                               | 274 | 14 | 5 | 27    | y2y6y8y9y14               | 1498.74 | 37.685  | 13726 | 3 | 500.25  | -13.11 |
| Q7CR87 SURA_SALTY Chaperone surA                             | 8  |                      | VAAVVNNGVVLESVDGLMQSVK                       | 27  | 23 | 8 | 50.94 | b3b4y7y8y9y13*y13y23      | 2343.24 | 91.104  | 10684 | 2 | 1172.12 | 8.34   |
| Q7CR87 SURA_SALTY Chaperone surA                             | 9  |                      | TTFAAAAKEYSQDPGSANQGDDLGWATPDIFDPAFRDALTK    | 318 | 41 | 4 | 14.08 | b9b11b13y14               | 4301.05 | 91.627  | 9728  | 4 | 1076.02 | 2.16   |
| Q7CR87 SURA_SALTY Chaperone surA                             | 10 |                      | FSEEAATWMQEQR                                | 405 | 13 | 7 | 58.41 | b2y3°y3y4y5y7y8           | 1612.72 | 60.064  | 9179  | 2 | 806.86  | 9.76   |
| Q7CR87 SURA_SALTY Chaperone surA                             | 11 |                      | GQISAPVHSSFGWHLIELLDTR                       | 362 | 22 | 5 | 13.39 | b10*b10b12*b12y11         | 2463.31 | 116.260 | 2096  | 3 | 821.77  | 12.59  |
| Q7CR87 SURA_SALTY Chaperone surA                             | 12 |                      | ITVLPQEVDALAK                                | 149 | 13 | 6 | 52.97 | b3°b3b4y9y10y11           | 1396.80 | 71.060  | 46772 | 2 | 698.90  | -3.15  |
| Q7CR87 SURA_SALTY Chaperone surA                             | 13 |                      | QAESIVVEAR                                   | 197 | 10 | 4 | 28.59 | b7y4°y4y5                 | 1131.58 | 27.771  | 4922  | 2 | 566.29  | 12.19  |
| Q7CR87 SURA_SALTY Chaperone surA                             | 14 |                      | LAITYSADQQALKGGQMGWGR                        | 214 | 21 | 9 | 64.83 | y4y5y8y9y11*y11y14*y14y18 | 2251.12 | 65.732  | 28624 | 3 | 751.04  | -3.90  |
| Q7CR87 SURA_SALTY Chaperone surA                             | 15 |                      | QIGTQNDASTELNLSHILALPENPTSEQVNDAQRQAESIVVEAR | 162 | 45 | 3 | 24.37 | y4y5y24                   | 4929.47 | 94.225  | 7717  | 4 | 1233.12 | 4.06   |
| Q7CR87 SURA_SALTY Chaperone surA                             | 16 |                      | KFSEEAATWMQEQR                               | 404 | 14 | 6 | 50.34 | b5b6b10y5y6y11            | 1740.79 | 57.252  | 5486  | 3 | 580.94  | -4.98  |
| Q7CR87 SURA_SALTY Chaperone surA                             | 17 |                      | EMIISEVRNNEVR                                | 134 | 13 | 3 | 20.57 | b7b12y10                  | 1588.83 | 71.222  | 4420  | 2 | 794.92  | 12.29  |
| Q7CR87 SURA_SALTY Chaperone surA                             | 18 | PhosphorylSTY(4)     | LAITYSADQQALK                                | 214 | 13 | 3 | 28.05 | y9y11y12                  | 1501.71 | 136.405 | 1871  | 1 | 1501.71 | -5.45  |
| Q7CR87 SURA_SALTY Chaperone surA                             | 19 |                      | PVHSSFGWHLIELLDTR                            | 367 | 17 | 1 | 7.8   | b10                       | 2007.06 | 116.320 | 4777  | 3 | 669.69  | 6.81   |
| P0AA02 NUSG_SALTY Transcription antitermination protein nusG | 1  |                      | TLFEPGEMVR                                   | 125 | 10 | 6 | 51.78 | b2°b2y5y6y7y8             | 1178.58 | 65.518  | 26044 | 2 | 589.79  | -8.29  |
| P0AA02 NUSG_SALTY Transcription antitermination protein nusG | 2  |                      | VMGFIGGTSDRPAPISDKVDAIMNR                    | 88  | 26 | 6 | 21.85 | b4b8y3y6y13y26            | 2776.36 | 55.777  | 17910 | 3 | 926.12  | -6.60  |

|                                                               |    |                                      |                                 |     |    |    |        |                                                      |         |         |       |   |         |        |
|---------------------------------------------------------------|----|--------------------------------------|---------------------------------|-----|----|----|--------|------------------------------------------------------|---------|---------|-------|---|---------|--------|
| [P0AA02]NUSG_SALTY Transcription antitermination protein nusG | 3  |                                      | LHNMEELFGEVMVPTEEVVEIR          | 31  | 22 | 8  | 43.64  | b3b5*b5b8*b8b9y9y10                                  | 2600.24 | 38.245  | 12108 | 3 | 867.42  | -13.33 |
| [P0AA02]NUSG_SALTY Transcription antitermination protein nusG | 4  |                                      | SEAPK                           | 1   | 5  | 1  | 13.19  | b3                                                   | 531.28  | 31.143  | 5925  | 1 | 531.28  | 9.77   |
| [P0AA02]NUSG_SALTY Transcription antitermination protein nusG | 5  |                                      | WYVVQAFSGFEGR                   | 8   | 13 | 5  | 32.21  | b5*b5y5y6y9                                          | 1545.76 | 58.065  | 3221  | 3 | 515.92  | 4.34   |
| [P0AA02]NUSG_SALTY Transcription antitermination protein nusG | 6  |                                      | VMGFIGGTSDRPAPISDK              | 88  | 18 | 3  | 22.93  | b4y3y4                                               | 1847.92 | 102.260 | 2367  | 2 | 924.46  | -7.99  |
| [P0AA02]NUSG_SALTY Transcription antitermination protein nusG | 7  |                                      | ATPVELDFSQVEK                   | 167 | 13 | 9  | 47.74  | b6b9*b9b11y8*y8y9*y9*y9                              | 1462.71 | 136.376 | 1891  | 1 | 1462.71 | -22.20 |
| [P0AA02]NUSG_SALTY Transcription antitermination protein nusG | 8  |                                      | VMGFIGGTSDRPAPISDKVDAIM NR      | 88  | 26 | 5  | 26.42  | b3y5y7y15y21                                         | 2776.35 | 73.417  | 38261 | 4 | 694.84  | -9.76  |
| [P0AA02]NUSG_SALTY Transcription antitermination protein nusG | 9  |                                      | ATPVELDFSQVEKA                  | 167 | 14 | 3  | 19.22  | b7b11y13                                             | 1533.78 | 70.251  | 14245 | 2 | 767.39  | -0.40  |
| [P0AA02]NUSG_SALTY Transcription antitermination protein nusG | 10 |                                      | TLFEPGEMVRVNDGPFADFNGVV EEVDYEK | 125 | 30 | 6  | 19.23  | b7b10y4y9y13*y13                                     | 3402.61 | 99.767  | 8492  | 4 | 851.41  | 6.67   |
| [P0AA02]NUSG_SALTY Transcription antitermination protein nusG | 11 |                                      | VNDGPFADFNGVVEEVDYEKSR          | 135 | 22 | 4  | 13.39  | b5y5*y5y10                                           | 2486.12 | 77.308  | 6698  | 4 | 622.29  | -10.02 |
| [P0AA02]NUSG_SALTY Transcription antitermination protein nusG | 12 | Oxidation+M(2)                       | VMGFIGGTSDRPAPISDK              | 88  | 18 | 5  | 34.54  | b6b8b9b12y11                                         | 1863.91 | 111.139 | 2934  | 2 | 932.46  | -9.10  |
| [P14845]CARA_SALTY Carbamoyl-phohate synthase small chain     | 1  | Carbamidomethyl+C(12)                | FLETDIPLFGICLGHQLLALASGAK       | 257 | 25 | 20 | 140.77 | b2b3b4b5*b5b6*b6b16b25 y3y6y7y8y9y14y16y19y22 y23y25 | 2684.45 | 127.573 | 52770 | 3 | 895.49  | -0.73  |
| [P14845]CARA_SALTY Carbamoyl-phohate synthase small chain     | 2  |                                      | AFPGLNGMDLAKEVTTAETYR           | 148 | 21 | 5  | 13.83  | b2b8y5*y5y11                                         | 2284.13 | 81.935  | 6541  | 3 | 762.05  | 2.99   |
| [P14845]CARA_SALTY Carbamoyl-phohate synthase small chain     | 3  |                                      | SEDDLPHFVVAYDFGAK               | 185 | 17 | 5  | 27.31  | b11*b11y6y11y12                                      | 1909.89 | 81.889  | 2058  | 3 | 637.30  | -1.85  |
| [P14845]CARA_SALTY Carbamoyl-phohate synthase small chain     | 4  |                                      | SALLVLEDGTQFHGR                 | 3   | 15 | 4  | 24.1   | b12b13y2y14                                          | 1642.84 | 60.980  | 1788  | 3 | 548.28  | -10.25 |
| [P14845]CARA_SALTY Carbamoyl-phohate synthase small chain     | 5  |                                      | QIVTLTYPHIGNVGTNK               | 50  | 17 | 6  | 33.89  | b4*b4b7b8y7y10                                       | 1854.98 | 55.637  | 2760  | 2 | 927.99  | -16.98 |
| [P14845]CARA_SALTY Carbamoyl-phohate synthase small chain     | 6  |                                      | FGHHGGNHPVK                     | 287 | 11 | 4  | 38.21  | b6b10y9y10                                           | 1186.58 | 70.459  | 1712  | 3 | 396.20  | -3.09  |
| [P14845]CARA_SALTY Carbamoyl-phohate synthase small chain     | 7  | Carbamidomethyl+C(6)                 | GAQNGCIIAGDSPDAK                | 125 | 16 | 5  | 24.17  | b5b10*b10y7y12                                       | 1573.75 | 47.556  | 1548  | 2 | 787.38  | 16.52  |
| [P14845]CARA_SALTY Carbamoyl-phohate synthase small chain     | 8  |                                      | SEDDLPHFVVAYDFGAKR              | 185 | 18 | 3  | 24.45  | y8y12y13                                             | 2066.00 | 97.382  | 21321 | 2 | 1033.51 | 2.72   |
| [P14845]CARA_SALTY Carbamoyl-phohate synthase small chain     | 9  | Carbamidomethyl+C(7)                 | MLVDRGCR                        | 207 | 8  | 5  | 53.98  | y3y5y6*y6y7                                          | 1006.48 | 27.727  | 8970  | 2 | 503.74  | -12.13 |
| [P14845]CARA_SALTY Carbamoyl-phohate synthase small chain     | 10 |                                      | FGHHGGNHPVKMDMR                 | 287 | 15 | 5  | 36.62  | y6*y6y7y11y13                                        | 1703.77 | 73.826  | 5295  | 3 | 568.59  | -9.74  |
| [P14845]CARA_SALTY Carbamoyl-phohate synthase small chain     | 11 | Carbamidomethyl+C(8)                 | EKGAQNGCIIAGDSPDAK              | 123 | 18 | 4  | 24.74  | b5b10b12y11                                          | 1830.89 | 81.963  | 2456  | 3 | 610.97  | 13.93  |
| [P14845]CARA_SALTY Carbamoyl-phohate synthase small chain     | 12 |                                      | AFPGLNGMDLAKEVTTAETYR           | 148 | 21 | 4  | 21.62  | b4y3y6y10                                            | 2284.12 | 84.109  | 1525  | 3 | 762.05  | -3.10  |
| [P14845]CARA_SALTY Carbamoyl-phohate synthase small chain     | 13 | Carbamidomethyl+C(18);Oxidation+M(1) | MNPDGIFLSNGPGDPAPCDYAITA IQK    | 230 | 27 | 3  | 11.88  | b8y3y11                                              | 2878.37 | 92.102  | 5728  | 3 | 960.13  | 12.38  |

|                                                          |    |                       |                                  |     |    |    |       |                                         |         |         |       |   |         |        |
|----------------------------------------------------------|----|-----------------------|----------------------------------|-----|----|----|-------|-----------------------------------------|---------|---------|-------|---|---------|--------|
| P14845 CARA_SALTY Carbamoyl-phohate synthase small chain | 14 | Oxidation+M(18)       | AIGATGSAGVEVVNTSMTGYQEILTDPSSYSR | 18  | 32 | 4  | 24.48 | b13b16y9y10                             | 3337.56 | 96.789  | 5148  | 3 | 1113.19 | -9.44  |
| P14845 CARA_SALTY Carbamoyl-phohate synthase small chain | 15 | Oxidation+M(4)        | NVVMITAQNHGFAVDEDSL PANLR        | 302 | 24 | 4  | 19.38 | b3b12b17y15                             | 2627.25 | 97.939  | 4708  | 4 | 657.57  | -13.10 |
| P14845 CARA_SALTY Carbamoyl-phohate synthase small chain | 16 |                       | AYDFGAK                          | 195 | 7  | 0  | 4.88  |                                         | 771.37  | 81.944  | 2274  | 1 | 771.37  | 4.04   |
| P14845 CARA_SALTY Carbamoyl-phohate synthase small chain | 17 |                       | LAKEVTTAETYR                     | 157 | 12 | 0  | 6.51  |                                         | 1381.74 | 81.879  | 2078  | 2 | 691.37  | 2.30   |
| P0A1H3 EFG_SALTY Elongation factor G                     | 1  |                       | VYSGVVNSGDTVLSNVK                | 337 | 17 | 14 | 68.61 | b1b2b4b5°b5b14*b14y5y10y11*y11y12y14y17 | 1737.91 | 62.811  | 64372 | 2 | 869.46  | 1.90   |
| P0A1H3 EFG_SALTY Elongation factor G                     | 2  |                       | IATDPFVGNLTFFR                   | 323 | 14 | 9  | 50.55 | b2b4b10y3y6y7y10y14*y14                 | 1597.84 | 93.309  | 53897 | 2 | 799.42  | 2.29   |
| P0A1H3 EFG_SALTY Elongation factor G                     | 3  |                       | SGPLAGYPVVDLGVR                  | 562 | 15 | 13 | 74.33 | b2b3°b3b6°b6b7°b7y3y4y8y10y11y15        | 1499.82 | 76.889  | 36921 | 2 | 750.42  | 1.47   |
| P0A1H3 EFG_SALTY Elongation factor G                     | 4  |                       | ILFYTG VNHK                      | 29  | 10 | 5  | 20.63 | y2y6°y6y8y10                            | 1191.64 | 55.556  | 35139 | 2 | 596.32  | -12.91 |
| P0A1H3 EFG_SALTY Elongation factor G                     | 5  |                       | IGEVHDDGAATMDWMEQE QER           | 39  | 20 | 9  | 51.9  | b7b8b10b12b13y2y5y9y20                  | 2332.00 | 62.802  | 24918 | 3 | 778.00  | -0.63  |
| P0A1H3 EFG_SALTY Elongation factor G                     | 6  |                       | EFNVEANVGK PQVAYREAIR            | 475 | 20 | 6  | 21.11 | b4°b4*b4b7b11y20                        | 2290.18 | 81.317  | 23021 | 2 | 1145.60 | -4.05  |
| P0A1H3 EFG_SALTY Elongation factor G                     | 7  |                       | LGANPVPLQLAIGAEEGFTGVVDLVK       | 161 | 26 | 5  | 18.22 | b4y4y10y12y26                           | 2607.42 | 119.890 | 21075 | 3 | 869.81  | -8.33  |
| P0A1H3 EFG_SALTY Elongation factor G                     | 8  |                       | GQYGHVVIDMYPLEPGSNPK             | 512 | 20 | 7  | 32.1  | b11y4y6y9°y9*y9y10                      | 2201.05 | 70.616  | 19269 | 3 | 734.36  | -7.21  |
| P0A1H3 EFG_SALTY Elongation factor G                     | 9  | Carbamidomethyl+C(10) | VLDGAVMVYCAVGGVQPQSETVWR         | 104 | 24 | 4  | 18.98 | b2y3y6y9                                | 2621.29 | 86.085  | 15752 | 3 | 874.43  | 1.02   |
| P0A1H3 EFG_SALTY Elongation factor G                     | 10 | Carbamidomethyl+C(20) | AGDIAAAIGLKDVTGDTLCDPENPIILER    | 378 | 30 | 6  | 16.47 | b3b9b25y11*y11y30                       | 3138.62 | 85.197  | 13714 | 3 | 1046.88 | 6.38   |
| P0A1H3 EFG_SALTY Elongation factor G                     | 11 |                       | NIGISAHIDAGK                     | 11  | 12 | 4  | 29.41 | b2y5y6y9                                | 1195.63 | 45.521  | 5725  | 2 | 598.32  | -11.74 |
| P0A1H3 EFG_SALTY Elongation factor G                     | 12 |                       | VEVETPEENTGDVIGDLSR              | 618 | 19 | 3  | 22.67 | b11y12y13                               | 2058.98 | 73.369  | 2074  | 2 | 1030.00 | 0.83   |
| P0A1H3 EFG_SALTY Elongation factor G                     | 13 |                       | EFNVEANVGK PQVAYR                | 475 | 16 | 5  | 23.63 | b4*b4y5*y5y6                            | 1820.91 | 54.105  | 28134 | 3 | 607.64  | -10.39 |
| P0A1H3 EFG_SALTY Elongation factor G                     | 14 |                       | YLGGEELTEEEIK                    | 236 | 13 | 3  | 35.04 | b10b11b12                               | 1509.73 | 89.313  | 10660 | 2 | 755.37  | -2.26  |
| P0A1H3 EFG_SALTY Elongation factor G                     | 15 |                       | VVGQIK                           | 153 | 6  | 1  | 13.6  | b4                                      | 643.41  | 45.741  | 9979  | 1 | 643.41  | -11.48 |
| P0A1H3 EFG_SALTY Elongation factor G                     | 16 | Carbamidomethyl+C(11) | VLNNEILVTCGSAFK                  | 255 | 16 | 3  | 17.1  | b5y3y9                                  | 1777.92 | 33.631  | 6847  | 3 | 593.31  | -17.85 |
| P0A1H3 EFG_SALTY Elongation factor G                     | 17 |                       | LHFGSYHDVDSSELA FK               | 577 | 17 | 4  | 22.84 | b5b13y8y10                              | 1951.95 | 84.441  | 5822  | 3 | 651.32  | 15.95  |
| P0A1H3 EFG_SALTY Elongation factor G                     | 18 |                       | MEFPEPVISIAVEPK                  | 408 | 15 | 5  | 52.24 | b3b4b7b9b10                             | 1685.91 | 70.498  | 5751  | 2 | 843.46  | 17.02  |
| P0A1H3 EFG_SALTY Elongation factor G                     | 19 |                       | IHAEVPLSEMFYATQLR                | 653 | 18 | 3  | 24.45 | b10b14b15                               | 2062.05 | 90.131  | 5021  | 2 | 1031.53 | 1.42   |
| P0A1H3 EFG_SALTY Elongation factor G                     | 20 | Carbamidomethyl+C(9)  | DVTTGDTLCDPENPIILER              | 389 | 19 | 4  | 14.89 | b8°b8b12y17                             | 2158.05 | 63.108  | 3225  | 3 | 720.02  | 6.22   |
| P0A1H3 EFG_SALTY Elongation factor G                     | 21 |                       | INIIDTPGHVDFTIEVER               | 83  | 18 | 3  | 22.69 | y8y10y12                                | 2068.04 | 91.882  | 2638  | 2 | 1034.52 | -14.87 |
| P0A1H3 EFG_SALTY Elongation factor G                     | 22 |                       | YLGGEELTEEEIKQALR                | 236 | 17 | 4  | 23.66 | b3b5°b5b8                               | 1977.99 | 73.763  | 45545 | 3 | 660.00  | -13.27 |
| P0A1H3 EFG_SALTY Elongation factor G                     | 23 |                       | GMLKGQSEVTGVK                    | 639 | 14 | 4  | 19.22 | b7b12y13*y13                            | 1462.75 | 60.172  | 37045 | 2 | 731.88  | -4.09  |
| P0A1H3 EFG_SALTY Elongation factor G                     | 24 |                       | NIGISAHIDAGKTTTTER               | 11  | 18 | 4  | 15.53 | b9°b9y14y16                             | 1884.95 | 84.470  | 7479  | 2 | 942.98  | -14.57 |
| P0A1H3 EFG_SALTY Elongation factor G                     | 25 |                       | AKPVLLEPIMKVEVETPEENTGDVIGDLSR   | 607 | 30 | 4  | 17.26 | y5y11*y11y13                            | 3278.72 | 84.024  | 7090  | 3 | 1093.58 | 1.71   |

|                                                            |    |                                                |                                          |     |    |    |        |                                                        |         |         |        |   |         |        |
|------------------------------------------------------------|----|------------------------------------------------|------------------------------------------|-----|----|----|--------|--------------------------------------------------------|---------|---------|--------|---|---------|--------|
| [P0A1H3]EFG_SALTY Elongation factor G                      | 26 |                                                | INIIDTPGHVDFTIEVERSMR                    | 83  | 21 | 5  | 38.1   | b11b12y8y10y11                                         | 2442.25 | 96.423  | 4947   | 4 | 611.32  | 3.20   |
| [P0A1H3]EFG_SALTY Elongation factor G                      | 27 |                                                | LAKEDPSFR                                | 437 | 9  | 4  | 44.85  | b5b8y4y8                                               | 1062.55 | 31.717  | 3659   | 2 | 531.78  | -5.40  |
| [P0A1H3]EFG_SALTY Elongation factor G                      | 28 | Carbamidomethyl+C(13)                          | SMRVLDGAVMVYCAVGGVQPQS<br>ETVWR          | 101 | 27 | 14 | 37.18  | b9°b9b12y3y5°y5y7°y7*y7<br>y8°y8*y8y12°y12             | 2995.48 | 136.368 | 3631   | 2 | 1498.24 | 7.50   |
| [P0A1H3]EFG_SALTY Elongation factor G                      | 29 | Phosphoryl STY(8)                              | YLGGEELTEEEIK                            | 236 | 13 | 3  | 20.57  | b5b9y5                                                 | 1589.71 | 54.178  | 22704  | 3 | 530.57  | 12.75  |
| [P0A1H3]EFG_SALTY Elongation factor G                      | 30 | Oxidation+M(10)                                | IHAEVPLSEMGFYATQLR                       | 653 | 18 | 5  | 26.5   | b10y4y9*y9y10                                          | 2078.04 | 108.884 | 1511   | 2 | 1039.52 | 0.35   |
| [P0A1H3]EFG_SALTY Elongation factor G                      | 31 |                                                | FYTGTVNHK                                | 31  | 8  | 0  | 2.04   |                                                        | 965.48  | 55.571  | 12117  | 2 | 483.25  | -0.44  |
| [P0A1H3]EFG_SALTY Elongation factor G                      | 32 |                                                | EFNVEANVGKPVAYR                          | 475 | 16 | 0  | 6.11   |                                                        | 1820.94 | 81.287  | 2078   | 3 | 607.65  | 7.37   |
| [Q8ZKP7]TPIS_SALTY Triosephohate isomerase                 | 1  | Carbamidomethyl+C(8)                           | ELTGVAGCDVAIAPPEMYIDLAKR                 | 28  | 24 | 6  | 12.67  | b2b4°b4y4y11y24                                        | 2589.31 | 82.907  | 50182  | 3 | 863.77  | 1.51   |
| [Q8ZKP7]TPIS_SALTY Triosephohate isomerase                 | 2  |                                                | SATPAQAQAVHK                             | 176 | 12 | 18 | 99.92  | b2b3°b3b12y1y2y3y4y5*y<br>5y6*y6y7*y7y8y9*y9y12        | 1208.63 | 19.690  | 44492  | 2 | 604.82  | -6.46  |
| [Q8ZKP7]TPIS_SALTY Triosephohate isomerase                 | 3  |                                                | TQGAAAFEGAVIAYEPVWAIGTG<br>K             | 152 | 24 | 11 | 47.56  | b1°b1b3b4b8b12b16y4y7y<br>12y24                        | 2407.26 | 93.738  | 36141  | 2 | 1204.13 | 12.27  |
| [Q8ZKP7]TPIS_SALTY Triosephohate isomerase                 | 4  | Carbamidomethyl+C(8)                           | ELTGVAGCDVAIAPPEMYIDLAK                  | 28  | 23 | 6  | 28.14  | b5b14y3y9y10y23                                        | 2433.24 | 88.330  | 10068  | 2 | 1217.12 | 13.45  |
| [Q8ZKP7]TPIS_SALTY Triosephohate isomerase                 | 5  |                                                | HMVNELVANLRK                             | 16  | 12 | 7  | 44.82  | b3b4b5b7°b7°b7y12                                      | 1423.76 | 58.064  | 6586   | 3 | 475.26  | -13.72 |
| [Q8ZKP7]TPIS_SALTY Triosephohate isomerase                 | 6  |                                                | AAAGSHIMLG AQNVDLNLSGAFT<br>GETSAEMLK    | 52  | 32 | 4  | 13.51  | b5b10y5y9                                              | 3204.63 | 62.788  | 2763   | 4 | 801.91  | 21.10  |
| [Q8ZKP7]TPIS_SALTY Triosephohate isomerase                 | 7  |                                                | HMVNELVANLR                              | 16  | 11 | 3  | 31.22  | b3b4b10                                                | 1295.68 | 41.627  | 1918   | 2 | 648.34  | -5.09  |
| [Q8ZKP7]TPIS_SALTY Triosephohate isomerase                 | 8  | Carbamidomethyl+C(9);<br>Carbamidomethyl+C(26) | EQGLTPVLCIGETEAENEAGKTEE<br>VCAR         | 117 | 28 | 17 | 154.97 | b4b14y3y4y5y6y7y10y11y<br>12°y12y13y20y21y23y24y<br>26 | 3090.44 | 72.706  | 111079 | 3 | 1030.82 | 2.29   |
| [Q8ZKP7]TPIS_SALTY Triosephohate isomerase                 | 9  |                                                | HMVNELVANLRK                             | 16  | 12 | 4  | 32.42  | b5b9b11°b11                                            | 1423.77 | 63.721  | 10659  | 2 | 712.39  | -11.40 |
| [Q8ZKP7]TPIS_SALTY Triosephohate isomerase                 | 10 |                                                | TQGAAAFEGAVIAYEPVWAIGTG<br>KSATPAQAQAVHK | 152 | 36 | 8  | 36.59  | b5°b5b6°b6°b6b7b10°b10                                 | 3596.81 | 136.277 | 6937   | 4 | 899.96  | -12.29 |
| [Q8ZKP7]TPIS_SALTY Triosephohate isomerase                 | 11 | Oxidation+M(5)                                 | HPLVMGNWK                                | 2   | 9  | 3  | 45.97  | y3y5y7                                                 | 1097.55 | 67.786  | 2206   | 2 | 549.28  | -5.67  |
| [Q8ZKP7]TPIS_SALTY Triosephohate isomerase                 | 12 |                                                | TPAQAQAVHK                               | 178 | 10 | 8  | 61.02  | b3°b3b4b5°b5b8°b8b9                                    | 1050.56 | 19.693  | 17714  | 2 | 525.78  | -8.60  |
| [Q8ZKP7]TPIS_SALTY Triosephohate isomerase                 | 13 |                                                | PAQAQAVHK                                | 179 | 9  | 8  | 78.98  | b3b4b5b6°b6b7°b7b8                                     | 949.51  | 19.693  | 14110  | 2 | 475.26  | -13.11 |
| [Q8ZKP7]TPIS_SALTY Triosephohate isomerase                 | 14 |                                                | ATPAQAQAVHK                              | 177 | 11 | 4  | 17.47  | b3°b3b5°b5                                             | 1121.59 | 19.720  | 1857   | 2 | 561.30  | -10.23 |
| [P0A251]AHPC_SALTY Alkyl hydroperoxide reductase subunit C | 1  |                                                | YAMIGDPTGALTR                            | 93  | 13 | 8  | 45.4   | b1b2b3y1y3y7y8y10                                      | 1365.68 | 63.651  | 44827  | 2 | 683.34  | -3.04  |
| [P0A251]AHPC_SALTY Alkyl hydroperoxide reductase subunit C | 2  |                                                | ATFVVDPPQGIIQAEVTAEGIGR                  | 120 | 23 | 14 | 58.27  | b2b3°b3b4b6b10°b10y1y2<br>y4y5y6y8y23                  | 2384.27 | 128.477 | 25447  | 3 | 795.43  | -5.94  |
| [P0A251]AHPC_SALTY Alkyl hydroperoxide reductase subunit C | 3  | Carbamidomethyl+C(15)                          | WSVFFFPADFTFVCPTELGDVA<br>DHYEELQK       | 32  | 31 | 6  | 35.38  | b2b6°b6b7y7y8                                          | 3757.76 | 119.493 | 7498   | 3 | 1253.26 | 10.53  |
| [P0A251]AHPC_SALTY Alkyl hydroperoxide reductase subunit C | 4  | Carbamidomethyl+C(13)                          | AAQYVAAHPEVCPAK                          | 153 | 16 | 10 | 92.69  | b3b4b5°b5b6y3y5y8y11y1<br>2                            | 1668.79 | 36.053  | 33219  | 3 | 556.93  | -16.02 |
| [P0A251]AHPC_SALTY Alkyl hydroperoxide reductase subunit C | 5  |                                                | LGVDVYSVSTDTHFTHK                        | 63  | 17 | 6  | 27.31  | b4°b4b6b7y3°y3                                         | 1905.95 | 67.093  | 3416   | 2 | 953.48  | 8.97   |
| [P0A251]AHPC_SALTY Alkyl hydroperoxide reductase subunit C | 6  |                                                | DTEGR                                    | 27  | 5  | 2  | 26.38  | y3y4                                                   | 577.27  | 74.920  | 1986   | 1 | 577.27  | 12.79  |
| [P0A251]AHPC_SALTY Alkyl hydroperoxide reductase subunit C | 7  |                                                | NGEFIEVTEKDTEGR                          | 17  | 15 | 6  | 36.97  | b4b5b7°b7y3y9                                          | 1723.81 | 85.982  | 2583   | 3 | 575.27  | -3.47  |



|                                                             |    |                                                      |                                  |     |    |    |       |                                  |         |         |       |   |         |        |
|-------------------------------------------------------------|----|------------------------------------------------------|----------------------------------|-----|----|----|-------|----------------------------------|---------|---------|-------|---|---------|--------|
| [P0A251 AHPC_SALTY Alkyl hydroperoxide reductase subunit C  | 8  |                                                      | YAMIGDPTGALTRNFDNMR              | 93  | 19 | 4  | 31.51 | b3b6b7b10                        | 2143.00 | 84.704  | 2407  | 4 | 536.50  | -4.67  |
| [P0A251 AHPC_SALTY Alkyl hydroperoxide reductase subunit C  | 9  |                                                      | YAMIGDPTGA                       | 93  | 10 | 1  | 7.42  | y7                               | 995.44  | 63.708  | 6983  | 2 | 498.23  | -7.60  |
| [Q8ZRC9 YAJQ_SALTY UPF0234 protein yajQ                     | 1  |                                                      | VLSEDFQVNQLLDILR                 | 49  | 17 | 10 | 39.63 | b8b11*b11b13*b13*b13y2y3y4y17    | 1989.08 | 104.639 | 34496 | 2 | 995.04  | 8.65   |
| [Q8ZRC9 YAJQ_SALTY UPF0234 protein yajQ                     | 2  |                                                      | GIEGASLDVPDEFVHSGK               | 72  | 18 | 7  | 46.69 | b4b15y6y10y11y12y18              | 1856.89 | 67.515  | 30308 | 3 | 619.63  | -7.89  |
| [Q8ZRC9 YAJQ_SALTY UPF0234 protein yajQ                     | 3  |                                                      | GGDLGQPQFK                       | 148 | 11 | 9  | 52.37 | b3b5b8*b8y1y5y7*y7y11            | 1193.59 | 64.331  | 14916 | 2 | 597.30  | -1.53  |
| [Q8ZRC9 YAJQ_SALTY UPF0234 protein yajQ                     | 4  |                                                      | SRDDLQSVMALVR                    | 135 | 13 | 4  | 29.82 | b5b7b11*b11                      | 1489.79 | 73.807  | 7893  | 2 | 745.40  | 9.67   |
| [Q8ZRC9 YAJQ_SALTY UPF0234 protein yajQ                     | 5  |                                                      | VQAQIQGEEIR                      | 120 | 11 | 13 | 81.58 | b1b2*b2y2y4y6*y6y7*y7y8y9*y9y10  | 1270.67 | 40.260  | 4413  | 2 | 635.84  | -1.73  |
| [Q8ZRC9 YAJQ_SALTY UPF0234 protein yajQ                     | 6  |                                                      | GVEATIELNDANK                    | 33  | 13 | 3  | 20.57 | b9y5y7                           | 1373.68 | 92.497  | 6471  | 2 | 687.35  | -4.98  |
| [Q8ZRC9 YAJQ_SALTY UPF0234 protein yajQ                     | 7  |                                                      | PSFDIVSEVDLQEAR                  | 1   | 15 | 7  | 52.21 | b6*b6b12y3y7y10y13               | 1704.87 | 84.463  | 2047  | 2 | 852.94  | 16.40  |
| [Q8ZRC9 YAJQ_SALTY UPF0234 protein yajQ                     | 8  |                                                      | DDLQSVMALVRGGDLGQPQFK            | 137 | 22 | 6  | 34.73 | y9*y9*y9y10y11*y11               | 2421.25 | 67.972  | 35275 | 3 | 807.76  | 12.00  |
| [Q8ZRC9 YAJQ_SALTY UPF0234 protein yajQ                     | 9  |                                                      | SRDDLQSVMALVR                    | 135 | 13 | 4  | 29.82 | b3b8b11*b11                      | 1489.79 | 108.859 | 14706 | 2 | 745.40  | 5.49   |
| [Q8ZRC9 YAJQ_SALTY UPF0234 protein yajQ                     | 10 |                                                      | GIEGASLDVPDEFVHSGKTWYVEAK        | 72  | 25 | 3  | 12.37 | b4b10y3                          | 2734.35 | 57.508  | 12304 | 3 | 912.12  | 5.00   |
| [Q8ZRC9 YAJQ_SALTY UPF0234 protein yajQ                     | 11 |                                                      | MPSFDIVSEVDLQEARNGVDNAVR         | 0   | 24 | 4  | 12.67 | b3b12*b12y8                      | 2661.30 | 58.572  | 10154 | 4 | 666.08  | 1.74   |
| [Q8ZRC9 YAJQ_SALTY UPF0234 protein yajQ                     | 12 |                                                      | RGIEGASLDVPDEFVHSGK              | 71  | 19 | 3  | 14.89 | b3b10y9                          | 2013.01 | 36.247  | 9666  | 3 | 671.67  | 1.33   |
| [Q8ZRC9 YAJQ_SALTY UPF0234 protein yajQ                     | 13 |                                                      | PSFDIVSEVDLQEARNGVDNAVR          | 1   | 23 | 4  | 13.01 | b11b15y5*y5                      | 2530.25 | 88.674  | 5400  | 4 | 633.32  | 0.10   |
| [Q8ZRC9 YAJQ_SALTY UPF0234 protein yajQ                     | 14 | Phosphoryl STY(5)                                    | GVEATIELNDANK                    | 33  | 13 | 6  | 29.57 | b3b6y5*y5y9*y9                   | 1453.64 | 38.177  | 22925 | 3 | 485.22  | -2.94  |
| [Q8ZRC9 YAJQ_SALTY UPF0234 protein yajQ                     | 15 |                                                      | GIEGASLDVPDEFVHSGK               | 72  | 18 | 0  | 5.29  |                                  | 1838.88 | 67.478  | 15166 | 3 | 613.63  | -4.38  |
| [P55890 DSBC_SALTY Thiol:disulfide interchange protein dsbC | 1  |                                                      | LGVQSTEIQASPVAGMK                | 32  | 17 | 10 | 67.79 | b9*y1y6y7y11*y11y12y13y14y17     | 1715.91 | 58.102  | 32477 | 2 | 858.46  | 5.26   |
| [P55890 DSBC_SALTY Thiol:disulfide interchange protein dsbC | 2  |                                                      | QGLESQAEQDMK                     | 146 | 12 | 13 | 87.58 | b2*b2b7*b7*b7b8b11y4y7y8*y8y9y10 | 1363.62 | 43.493  | 21658 | 2 | 682.31  | -0.63  |
| [P55890 DSBC_SALTY Thiol:disulfide interchange protein dsbC | 3  | Carbamidomethyl+C(11)<br>;Carbamidomethyl+C(14)<br>) | HVITVFTDITCGYCHK                 | 108 | 16 | 3  | 17.1  | b10y3y5                          | 1950.96 | 87.987  | 66064 | 2 | 975.98  | 21.71  |
| [P55890 DSBC_SALTY Thiol:disulfide interchange protein dsbC | 4  |                                                      | TVLTHSGVLYVTDDGK                 | 49  | 16 | 4  | 24.17 | b5b7y3y9                         | 1704.84 | 60.340  | 18005 | 2 | 852.93  | -21.41 |
| [P55890 DSBC_SALTY Thiol:disulfide interchange protein dsbC | 5  |                                                      | FMMFTLLAAVFSGVAHADDAAIR          | 4   | 23 | 4  | 28.73 | b6b8b9b11                        | 2454.27 | 97.831  | 6635  | 3 | 818.76  | 15.12  |
| [P55890 DSBC_SALTY Thiol:disulfide interchange protein dsbC | 6  |                                                      | YLAFPRQGLESQAEQDMK               | 140 | 18 | 4  | 21.66 | b11b13y3y10                      | 2111.00 | 72.361  | 16320 | 3 | 704.34  | -12.61 |
| [P55890 DSBC_SALTY Thiol:disulfide interchange protein dsbC | 7  |                                                      | FMMFTLLAAVFSGVAHADDAAIR<br>QSLAK | 4   | 28 | 4  | 36.32 | b9b11b12b13                      | 2981.50 | 108.863 | 2532  | 3 | 994.50  | -12.61 |
| [P55890 DSBC_SALTY Thiol:disulfide interchange protein dsbC | 8  | Carbamidomethyl+C(16)<br>;Carbamidomethyl+C(19)<br>) | APDEKHVITVFTDITCGYCHK            | 103 | 21 | 5  | 24.63 | b5*b5y4y11y12                    | 2491.18 | 92.144  | 1724  | 2 | 1246.09 | 2.16   |

|                                                            |    |                       |                                               |     |    |    |       |                                      |         |         |       |   |         |        |
|------------------------------------------------------------|----|-----------------------|-----------------------------------------------|-----|----|----|-------|--------------------------------------|---------|---------|-------|---|---------|--------|
| P55890 DSBC_SALTY Thiol:disulfide interchange protein dsbC | 9  | Phosphoryl STY(6)     | LGVQSTEIQASPVAGMK                             | 32  | 17 | 4  | 39.07 | b3b4b5b8                             | 1795.87 | 38.199  | 1590  | 3 | 599.30  | 8.22   |
| P66541 RS2_SALTY 30S ribosomal protein S2                  | 1  |                       | TVPMFNEALAE LNK                               | 45  | 14 | 10 | 30.65 | b2b3°b3y2y9y10*y11y12*y12y14         | 1576.81 | 84.575  | 58741 | 2 | 788.91  | 4.65   |
| P66541 RS2_SALTY 30S ribosomal protein S2                  | 2  |                       | WLGGMLTNWK                                    | 95  | 10 | 4  | 33.82 | y4y8y9y10                            | 1205.61 | 85.574  | 42963 | 2 | 603.31  | -2.53  |
| P66541 RS2_SALTY 30S ribosomal protein S2                  | 3  |                       | MATVSMR                                       | 0   | 7  | 4  | 40.38 | b5°b5y4y6                            | 795.40  | 99.815  | 8264  | 1 | 795.40  | 13.66  |
| P66541 RS2_SALTY 30S ribosomal protein S2                  | 4  |                       | AGVHFHGHQTR                                   | 11  | 10 | 3  | 36.83 | y3y4y5                               | 1109.55 | 47.453  | 2142  | 1 | 1109.55 | -11.44 |
| P66541 RS2_SALTY 30S ribosomal protein S2                  | 5  |                       | DMGGLPDALFVIDADHEHIAIK                        | 152 | 22 | 4  | 22.14 | b12°b12b13y12                        | 2377.17 | 65.196  | 1660  | 3 | 793.06  | -8.11  |
| P66541 RS2_SALTY 30S ribosomal protein S2                  | 6  |                       | WLGGMLTNWKTVR                                 | 95  | 13 | 3  | 29.82 | b4b9b11                              | 1561.84 | 73.193  | 5876  | 2 | 781.43  | 8.91   |
| P66541 RS2_SALTY 30S ribosomal protein S2                  | 7  |                       | YWNPKMKPFIFGAR                                | 21  | 14 | 3  | 27    | b7b8b11                              | 1754.92 | 83.089  | 5582  | 2 | 877.97  | 2.16   |
| P66541 RS2_SALTY 30S ribosomal protein S2                  | 8  |                       | DLETQSQDGTFEKLTK                              | 115 | 16 | 3  | 17.1  | b3b13y13                             | 1839.89 | 77.667  | 3959  | 2 | 920.45  | -5.57  |
| P63411 ACKA_SALTY Acetate kinase                           | 1  |                       | LDVVFTGGIGENAAMVR                             | 324 | 18 | 8  | 36.88 | b2b3b8b12b15°b15y8y18                | 1819.92 | 93.761  | 44587 | 2 | 910.46  | -11.00 |
| P63411 ACKA_SALTY Acetate kinase                           | 2  | Carbamidomethyl+C(19) | FAIDAVNGDEYLSGLAECFHLPEAR                     | 17  | 26 | 13 | 59.69 | b2b3b12y4°y4y5y10y12°y12y14y19y22y26 | 2907.41 | 104.589 | 29325 | 3 | 969.81  | 4.37   |
| P63411 ACKA_SALTY Acetate kinase                           | 3  |                       | EGTRPAVVIPTNEELVIAQDASR                       | 374 | 23 | 11 | 59.17 | b13°b13b15y6y7y11°y11*y11y13y14y15   | 2465.30 | 69.493  | 28928 | 3 | 822.44  | 0.89   |
| P63411 ACKA_SALTY Acetate kinase                           | 4  |                       | DSASFAPLHNPAHLIGIAEALK                        | 114 | 22 | 5  | 24.15 | b9b13b14y8y22                        | 2272.23 | 86.500  | 28761 | 3 | 758.08  | 10.96  |
| P63411 ACKA_SALTY Acetate kinase                           | 5  | Carbamidomethyl+C(18) | MLTKESGLLGLEVTSDCR                            | 268 | 19 | 5  | 25.79 | b6b7b13°b13y9                        | 2110.02 | 67.037  | 4763  | 4 | 528.26  | -14.69 |
| P63411 ACKA_SALTY Acetate kinase                           | 6  |                       | LGVLGFEVDHER                                  | 348 | 12 | 5  | 34.15 | b10y3y6°y6y7                         | 1370.70 | 63.812  | 3699  | 2 | 685.85  | -6.95  |
| P63411 ACKA_SALTY Acetate kinase                           | 7  | Carbamidomethyl+C(1)  | CVDTSMGLTPLEGLVMGTR                           | 224 | 19 | 8  | 61.33 | b12°b12b13y4y5y10y11y13              | 2037.02 | 94.851  | 21920 | 2 | 1019.02 | 21.39  |
| P63411 ACKA_SALTY Acetate kinase                           | 8  | Carbamidomethyl+C(14) | MLNKPVEELNIITCHLGNNGSVSAR                     | 195 | 26 | 3  | 12.11 | b9y9y11                              | 2822.46 | 105.784 | 2963  | 3 | 941.49  | -3.37  |
| P63411 ACKA_SALTY Acetate kinase                           | 9  |                       | LGVLGFEVDHERNLAAR                             | 348 | 17 | 4  | 27.31 | b3b13b14y13                          | 1895.98 | 88.623  | 21212 | 2 | 948.50  | -13.07 |
| P63411 ACKA_SALTY Acetate kinase                           | 10 |                       | MDGSKQEAALGAGAAHSEALNFI VNTILAQKPELSAQLTAIGHR | 47  | 44 | 3  | 23.73 | b5y12y13                             | 4529.33 | 102.154 | 14282 | 5 | 906.67  | -7.01  |
| P63411 ACKA_SALTY Acetate kinase                           | 11 | Phosphoryl STY(11)    | EGTRPAVVIPTNEELVIAQDASR                       | 374 | 23 | 4  | 13.01 | b12_H3PO4<br>b12°b12b15_HPO3 b15y12  | 2545.29 | 91.671  | 48169 | 3 | 849.10  | 14.68  |
| P63411 ACKA_SALTY Acetate kinase                           | 12 | Phosphoryl STY(25)    | NVAVFDATAFHQTMPEESYLYALP YSLYKEHGVR           | 144 | 33 | 4  | 16.82 | y5°y5y7y9                            | 3955.85 | 81.352  | 3721  | 4 | 989.72  | 5.80   |
| P63411 ACKA_SALTY Acetate kinase                           | 13 |                       | DSASFAPLHNPAHLIGIAE                           | 114 | 19 | 0  | 6.92  |                                      | 1959.98 | 86.480  | 2254  | 3 | 654.00  | -8.35  |
| P02936 OMPA_SALTY Outer membrane protein A                 | 1  | Carbamidomethyl+C(13) | GMGESNPVTGNTCDNVKPR                           | 302 | 19 | 12 | 72.27 | b5y2y5y7y8*y8y10y11*y11y13y17y19     | 2032.90 | 38.379  | 66586 | 3 | 678.30  | -10.33 |
| P02936 OMPA_SALTY Outer membrane protein A                 | 2  |                       | STLKPEGQQALDQLYSQLSNLDPK                      | 231 | 24 | 4  | 12.67 | b12y2y6y10                           | 2673.38 | 89.681  | 26365 | 3 | 891.80  | 3.11   |
| P02936 OMPA_SALTY Outer membrane protein A                 | 3  |                       | SDVLFNFNK                                     | 222 | 9  | 4  | 44.85 | b3b6y5y6                             | 1083.53 | 69.227  | 25187 | 2 | 542.27  | -14.53 |
| P02936 OMPA_SALTY Outer membrane protein A                 | 4  |                       | FGQQEAAPV VAPAPAPEVQTK                        | 194 | 23 | 8  | 42.81 | b10b11°b11y6y8y10y13y23              | 2303.23 | 54.706  | 8010  | 2 | 1152.12 | 13.36  |
| P02936 OMPA_SALTY Outer membrane protein A                 | 5  |                       | LEYQWTNNIGDANTIGTRPDNGL LSVGVSYR              | 163 | 31 | 4  | 17.09 | b2y5y12y16                           | 3423.70 | 112.855 | 3893  | 4 | 856.68  | 3.42   |
| P02936 OMPA_SALTY Outer membrane protein A                 | 6  |                       | DVVTQPQA                                      | 342 | 8  | 4  | 33.01 | b6b7y4*y4                            | 857.45  | 53.190  | 3186  | 2 | 429.23  | 10.82  |

|                                             |    |                                                      |                                        |     |    |    |       |                                         |         |         |        |   |         |        |
|---------------------------------------------|----|------------------------------------------------------|----------------------------------------|-----|----|----|-------|-----------------------------------------|---------|---------|--------|---|---------|--------|
| [P02936]OMPA_SALTY Outer membrane protein A | 7  |                                                      | AQSVVDYLSK                             | 281 | 11 | 4  | 36.63 | b6y6y7y9                                | 1222.66 | 72.543  | 34087  | 2 | 611.83  | -4.39  |
| [P02936]OMPA_SALTY Outer membrane protein A | 8  |                                                      | LGYPITDDLDVYTR                         | 103 | 14 | 4  | 34.78 | y9y10*y10y11                            | 1640.82 | 76.442  | 12284  | 2 | 820.91  | 0.67   |
| [P02936]OMPA_SALTY Outer membrane protein A | 9  |                                                      | LGYPITDDLDVYTRLGGMVWR                  | 103 | 21 | 4  | 13.83 | b13*b13b19y5                            | 2440.21 | 92.163  | 104427 | 3 | 814.08  | -8.20  |
| [P02936]OMPA_SALTY Outer membrane protein A | 10 | Carbamidomethyl+C(17)                                | ISARGMGESNPVTGNTCDNVKPR                | 298 | 23 | 4  | 13.01 | b3*b3y8y10                              | 2460.18 | 70.389  | 8712   | 3 | 820.73  | 4.56   |
| [P02936]OMPA_SALTY Outer membrane protein A | 11 |                                                      | MPYKGDNINGAYK                          | 81  | 13 | 5  | 20.57 | b6*b6b11*b11y9                          | 1470.69 | 136.443 | 2428   | 1 | 1470.69 | -10.62 |
| [P02936]OMPA_SALTY Outer membrane protein A | 12 | Phosphoryl STY(7)                                    | AQSVVDYLSK                             | 281 | 11 | 4  | 27.24 | b5*b5y5y6                               | 1302.64 | 51.515  | 2263   | 3 | 434.88  | 11.53  |
| [P0A1G5]DKSA_SALTY DnaK suppressor protein  | 1  |                                                      | TVTHMQDEAANFPDPVDR                     | 57  | 18 | 6  | 40.56 | b6y4y6y7y8y18                           | 2042.91 | 56.429  | 23508  | 3 | 681.64  | -7.65  |
| [P0A1G5]DKSA_SALTY DnaK suppressor protein  | 2  | Carbamidomethyl+C(10)<br>;Carbamidomethyl+C(13)<br>) | LEARPTADLCIDCK                         | 125 | 14 | 4  | 27    | y6y8y9y14                               | 1661.80 | 40.964  | 3215   | 2 | 831.40  | -0.44  |
| [P0A1G5]DKSA_SALTY DnaK suppressor protein  | 3  |                                                      | ILEAWR                                 | 42  | 6  | 2  | 26.79 | b3y3                                    | 787.45  | 36.899  | 60176  | 2 | 394.23  | 7.13   |
| [P0A1G5]DKSA_SALTY DnaK suppressor protein  | 4  |                                                      | AAQEEFSLELRNR                          | 75  | 14 | 7  | 45.3  | b3b11b12*b12b13*b13y13                  | 1691.81 | 136.480 | 2333   | 1 | 1691.81 | -11.91 |
| [P0A1G5]DKSA_SALTY DnaK suppressor protein  | 5  | Phosphoryl STY(23)                                   | TSSLSILAIGVEPYQEKPGEEYM<br>NEAQLSHFK   | 8   | 33 | 4  | 22.18 | b15y9y10*y10                            | 3746.71 | 96.343  | 2391   | 3 | 1249.57 | -12.71 |
| [P58661]AAT_SALTY Aartate aminotransferase  | 1  |                                                      | ANYSNPPAHGASIVATILSNDALR               | 280 | 24 | 5  | 32.81 | b3b8b12y6y7                             | 2452.25 | 86.321  | 14001  | 3 | 818.09  | -2.29  |
| [P58661]AAT_SALTY Aartate aminotransferase  | 2  | Carbamidomethyl+C(4)                                 | VGACTLVAADAETVDR                       | 254 | 16 | 4  | 17.1  | b3b7y10y16                              | 1647.81 | 43.571  | 10580  | 2 | 824.41  | 3.04   |
| [P58661]AAT_SALTY Aartate aminotransferase  | 3  |                                                      | MFENITAAPADPILGLADLFR                  | 0   | 21 | 9  | 43.9  | b2b3b5b7b8y2y3y7y14                     | 2275.20 | 120.475 | 10237  | 2 | 1138.10 | 7.62   |
| [P58661]AAT_SALTY Aartate aminotransferase  | 4  |                                                      | VWVSNPSWPNHK                           | 122 | 12 | 4  | 22.21 | b6b8y4*y4                               | 1450.71 | 54.336  | 4362   | 3 | 484.24  | -6.06  |
| [P58661]AAT_SALTY Aartate aminotransferase  | 5  |                                                      | INLGIGVYKDETGK                         | 28  | 14 | 6  | 38.43 | b2b10y7y8y9*y9                          | 1506.82 | 44.982  | 2585   | 2 | 753.91  | 2.19   |
| [P58661]AAT_SALTY Aartate aminotransferase  | 6  |                                                      | GWLPLFD FayQG FAR                      | 204 | 15 | 4  | 10.45 | b10*b10y2y13                            | 1787.90 | 89.948  | 2254   | 2 | 894.45  | 3.21   |
| [P58661]AAT_SALTY Aartate aminotransferase  | 7  |                                                      | TAQTPGGTGALR                           | 96  | 12 | 3  | 22.21 | b6b8y8                                  | 1129.59 | 42.260  | 1956   | 3 | 377.20  | -2.59  |
| [P58661]AAT_SALTY Aartate aminotransferase  | 8  |                                                      | AIWEQELTDMR                            | 304 | 11 | 14 | 79.21 | b4*b4b6*b6b8*b8b9*b9y3°<br>y3y6°y6y7*y7 | 1391.69 | 42.216  | 3412   | 3 | 464.57  | 21.49  |
| [P58661]AAT_SALTY Aartate aminotransferase  | 9  |                                                      | QNGMFSFSGLTK                           | 343 | 12 | 3  | 22.21 | b3b10y11                                | 1316.61 | 73.182  | 2675   | 3 | 439.54  | -19.19 |
| [P58661]AAT_SALTY Aartate aminotransferase  | 10 |                                                      | EEFGVYAVASGR                           | 362 | 12 | 6  | 44.03 | b3b8y6y9*y9y10                          | 1284.62 | 91.667  | 2100   | 2 | 642.81  | -4.66  |
| [P58661]AAT_SALTY Aartate aminotransferase  | 11 |                                                      | NFGLYNER                               | 246 | 8  | 4  | 36.02 | b6y4y7*y7                               | 1012.49 | 103.023 | 1634   | 1 | 1012.49 | 2.95   |
| [P58661]AAT_SALTY Aartate aminotransferase  | 12 |                                                      | ELIVASSYSKNFGLYNER                     | 236 | 18 | 6  | 29.06 | b9*b9b11y8y9*y9                         | 2090.06 | 86.138  | 41968  | 3 | 697.36  | 1.52   |
| [P58661]AAT_SALTY Aartate aminotransferase  | 13 | Carbamidomethyl+C(27)                                | EEFGVYAVASGRVNVAGMTPDN<br>MAPLCEAIVAVL | 362 | 34 | 3  | 22.28 | b12b13y4                                | 3550.76 | 80.199  | 26838  | 4 | 888.45  | 7.08   |
| [P58661]AAT_SALTY Aartate aminotransferase  | 14 | Carbamidomethyl+C(4)                                 | VGACTLVAADAETVDRAFSQMK                 | 254 | 22 | 5  | 30.18 | b8b10b11b14y4                           | 2340.14 | 85.856  | 8142   | 3 | 780.72  | 1.77   |
| [P58661]AAT_SALTY Aartate aminotransferase  | 15 |                                                      | QLFVNTLQEKGANR                         | 322 | 14 | 6  | 46.69 | b4b5b6y4y7°y7                           | 1617.89 | 36.124  | 7538   | 3 | 539.97  | 13.66  |
| [P58661]AAT_SALTY Aartate aminotransferase  | 16 |                                                      | MFENITAAPADPILGLADLFRADD<br>RPGK       | 0   | 28 | 3  | 11.68 | b7b11y11                                | 3014.52 | 107.382 | 3075   | 3 | 1005.51 | -8.10  |
| [P58661]AAT_SALTY Aartate aminotransferase  | 17 |                                                      | RVWVSNPSWPNHK                          | 121 | 13 | 6  | 66.96 | b10b11y8y9y10y11                        | 1606.82 | 94.883  | 2314   | 2 | 803.91  | -5.01  |
| [P58661]AAT_SALTY Aartate aminotransferase  | 18 |                                                      | AIWEQELTDMRQR                          | 304 | 13 | 3  | 29.82 | b6b8b12                                 | 1675.82 | 94.750  | 1878   | 2 | 838.42  | 1.46   |

|                                                             |    |                       |                                 |     |    |    |       |                           |         |         |        |   |         |        |
|-------------------------------------------------------------|----|-----------------------|---------------------------------|-----|----|----|-------|---------------------------|---------|---------|--------|---|---------|--------|
| P58661 AAT_SALTY Aartate aminotransferase                   | 19 |                       | VWVSNPSWPNH                     | 122 | 11 | 1  | 7.59  | y4                        | 1322.63 | 54.331  | 16017  | 3 | 441.55  | 2.77   |
| P58661 AAT_SALTY Aartate aminotransferase                   | 20 |                       | NLGIGVYKDETGK                   | 29  | 13 | 1  | 7.31  | b11                       | 1393.72 | 44.927  | 3459   | 2 | 697.37  | -5.26  |
| P67904 RS10_SALTY 30S ribosomal protein S10                 | 1  |                       | LIDQSTAEIVETAK                  | 16  | 14 | 11 | 78.18 | b2b6b9b10y2y3y5y8y9y10y14 | 1517.81 | 56.235  | 63725  | 2 | 759.41  | 2.09   |
| P67904 RS10_SALTY 30S ribosomal protein S10                 | 2  |                       | LVDIVEPTEK                      | 72  | 10 | 7  | 61    | b2b3y3y4y6y8y10           | 1142.62 | 52.519  | 32116  | 2 | 571.82  | -5.02  |
| P67904 RS10_SALTY 30S ribosomal protein S10                 | 3  |                       | DQYEIR                          | 62  | 6  | 2  | 13.6  | y5°y5                     | 823.39  | 33.006  | 16270  | 2 | 412.20  | -1.41  |
| P67904 RS10_SALTY 30S ribosomal protein S10                 | 4  |                       | RLVDIVEPTEK                     | 71  | 11 | 7  | 50.61 | b4b5b7y4°y4y5°y5          | 1298.72 | 51.481  | 34157  | 2 | 649.87  | -5.83  |
| P67904 RS10_SALTY 30S ribosomal protein S10                 | 5  |                       | GPIPLPTRK                       | 37  | 9  | 4  | 54.39 | y3y4y5y6                  | 978.60  | 43.815  | 28917  | 2 | 489.80  | -9.29  |
| P67904 RS10_SALTY 30S ribosomal protein S10                 | 6  |                       | AFDHLRIDQSTAEIVETAK             | 11  | 19 | 4  | 22.67 | b12*b12y12y13             | 2144.07 | 78.723  | 2859   | 3 | 715.36  | -12.64 |
| P67904 RS10_SALTY 30S ribosomal protein S10                 | 7  |                       | LIDQSTAEIVE                     | 16  | 11 | 3  | 15.57 | y5y7°y7                   | 1217.61 | 56.187  | 8223   | 2 | 609.31  | -11.13 |
| P0A7Z7 RPOA_SALTY DNA-directed RNA polymerase subunit alpha | 1  |                       | SLTEIKDVLASR                    | 298 | 12 | 7  | 52.57 | b4°b4y3y4y6y7y12          | 1331.73 | 63.817  | 56753  | 2 | 666.37  | -14.85 |
| P0A7Z7 RPOA_SALTY DNA-directed RNA polymerase subunit alpha | 2  |                       | VTLEPLER                        | 25  | 8  | 6  | 40.79 | y1y4°y4y6y7y8             | 956.53  | 52.821  | 34737  | 2 | 478.77  | -9.32  |
| P0A7Z7 RPOA_SALTY DNA-directed RNA polymerase subunit alpha | 3  | Carbamidomethyl+C(6)  | LLVDACYPVER                     | 170 | 12 | 6  | 61.02 | y5y6y7y8y10y12            | 1421.71 | 60.042  | 29090  | 2 | 711.36  | 0.00   |
| P0A7Z7 RPOA_SALTY DNA-directed RNA polymerase subunit alpha | 4  |                       | LVIEMETNGTIDPEEAIR              | 200 | 18 | 8  | 32.63 | b9°b9*b9b10b12*b12y10y12  | 2030.03 | 83.726  | 11733  | 3 | 677.35  | 8.36   |
| P0A7Z7 RPOA_SALTY DNA-directed RNA polymerase subunit alpha | 5  |                       | EGVQEDILEILLNLK                 | 71  | 15 | 10 | 79.08 | b6b7b8b9*b9b10y2y4y5y15   | 1725.97 | 122.103 | 9731   | 2 | 863.49  | 4.46   |
| P0A7Z7 RPOA_SALTY DNA-directed RNA polymerase subunit alpha | 6  |                       | GFGHTLGNALRR                    | 33  | 12 | 3  | 12.33 | b8*b11y5                  | 1298.72 | 63.854  | 6305   | 2 | 649.86  | 9.40   |
| P0A7Z7 RPOA_SALTY DNA-directed RNA polymerase subunit alpha | 7  |                       | LVDIEQVSSTHAK                   | 12  | 13 | 4  | 32.21 | b3y4y5y11                 | 1426.73 | 46.120  | 52744  | 3 | 476.25  | -18.05 |
| P0A7Z7 RPOA_SALTY DNA-directed RNA polymerase subunit alpha | 8  |                       | QPEVK                           | 238 | 5  | 1  | 13.19 | b4                        | 600.34  | 31.762  | 11782  | 1 | 600.34  | 4.58   |
| P0A7Z7 RPOA_SALTY DNA-directed RNA polymerase subunit alpha | 9  |                       | AEAIHYIGDLVQR                   | 271 | 13 | 4  | 20.57 | b11y6y10*y10              | 1484.76 | 63.684  | 9240   | 3 | 495.59  | -13.98 |
| P0A7Z7 RPOA_SALTY DNA-directed RNA polymerase subunit alpha | 10 | Carbamidomethyl+C(10) | RILLSSMPGCAVTEVEIDGVLHEY<br>STK | 44  | 27 | 4  | 15.27 | b12b18y5y12               | 3004.50 | 114.525 | 114377 | 4 | 751.88  | -4.71  |
| P0A7Z7 RPOA_SALTY DNA-directed RNA polymerase subunit alpha | 11 | Carbamidomethyl+C(18) | IHSEEDERPIGRLLVDACYPVER         | 158 | 24 | 4  | 19.38 | b5b8b10y7                 | 2840.40 | 62.109  | 13752  | 4 | 710.85  | -0.95  |
| P0A7Z7 RPOA_SALTY DNA-directed RNA polymerase subunit alpha | 12 |                       | VEQRTDLDK                       | 191 | 9  | 3  | 45.97 | b3b6b8                    | 1103.55 | 39.787  | 1722   | 2 | 552.28  | -13.94 |
| P0A7Z7 RPOA_SALTY DNA-directed RNA polymerase subunit alpha | 13 | Phosphoryl STY(10)    | LVIEMETNGTIDPEEAIIR             | 200 | 19 | 4  | 28.4  | b8b9y10y13                | 2266.05 | 90.652  | 9264   | 2 | 1133.53 | -9.80  |

|                                                              |    |                                       |                                |     |    |    |       |                               |         |         |       |   |         |        |
|--------------------------------------------------------------|----|---------------------------------------|--------------------------------|-----|----|----|-------|-------------------------------|---------|---------|-------|---|---------|--------|
| [P0A7Z7 RPOA_SALTY DNA-directed RNA polymerase subunit alpha | 14 | Phosphoryl STY(6)                     | MQGSVTEFLKPR                   | 0   | 12 | 3  | 22.21 | b5y7y11                       | 1472.68 | 73.132  | 1612  | 3 | 491.57  | -2.49  |
| [P0A7Z7 RPOA_SALTY DNA-directed RNA polymerase subunit alpha | 15 | Oxidation+M(5)                        | LVIEMETNGTIDPEEAIR             | 200 | 18 | 6  | 32.63 | b7b9b10°b10y3y12              | 2046.02 | 79.531  | 2699  | 4 | 512.26  | 4.83   |
| [P0A7Z7 RPOA_SALTY DNA-directed RNA polymerase subunit alpha | 16 |                                       | TEIKDVLASR                     | 300 | 10 | 0  | 2.85  |                               | 1131.63 | 63.759  | 14955 | 2 | 566.32  | -10.46 |
| [P0A7Z7 RPOA_SALTY DNA-directed RNA polymerase subunit alpha | 17 | Carbamidomethyl+C(6)                  | LLVDACYSPVER                   | 170 | 12 | 0  | 2.85  |                               | 1403.69 | 60.015  | 72084 | 3 | 468.57  | -5.39  |
| [P65692 K6PF_SALTY 6-phohofructokinase                       | 1  |                                       | IGVLTSGGDAPGMNAAIR             | 4   | 18 | 6  | 43.57 | b3y8y9y12y13y18               | 1699.89 | 62.905  | 23438 | 2 | 850.45  | 3.95   |
| [P65692 K6PF_SALTY 6-phohofructokinase                       | 2  | Carbamidomethyl+C(1)                  | CVGIQNEQLVHHDIIDAENMK          | 283 | 22 | 8  | 43.89 | b3b10y5y8y12°y12y13y20        | 2576.27 | 81.519  | 13078 | 3 | 859.43  | 2.94   |
| [P65692 K6PF_SALTY 6-phohofructokinase                       | 3  |                                       | FPEFRDENIR                     | 73  | 10 | 7  | 57.98 | b2b3b4°b4b5b8y6               | 1322.65 | 48.835  | 8419  | 3 | 441.55  | -0.09  |
| [P65692 K6PF_SALTY 6-phohofructokinase                       | 4  |                                       | GGSPVPYDR                      | 253 | 9  | 3  | 30.41 | b4y4y5                        | 947.46  | 33.896  | 7808  | 2 | 474.23  | 2.51   |
| [P65692 K6PF_SALTY 6-phohofructokinase                       | 5  |                                       | AALTEGLEVMGIYDGYLGLYEDR        | 26  | 23 | 6  | 20.05 | b5°b5b11b13y2y9               | 2548.23 | 83.030  | 3211  | 4 | 637.81  | 0.57   |
| [P65692 K6PF_SALTY 6-phohofructokinase                       | 6  |                                       | MGAYAIDLLLEGHGGR               | 267 | 16 | 11 | 99.35 | b3b11b12b13y3y4y6y7y10y13°y13 | 1672.82 | 82.126  | 17073 | 3 | 558.28  | -16.64 |
| [P65692 K6PF_SALTY 6-phohofructokinase                       | 7  | Carbamidomethyl+C(8)                  | LTEMGFPCIGLPGTIDNDIK           | 112 | 20 | 4  | 21.11 | y5y9y11*y11                   | 2191.12 | 84.993  | 6294  | 3 | 731.04  | 18.05  |
| [P65692 K6PF_SALTY 6-phohofructokinase                       | 8  |                                       | FPEFR                          | 73  | 5  | 1  | 13.19 | b3                            | 695.34  | 48.125  | 3691  | 1 | 695.34  | -10.01 |
| [P65692 K6PF_SALTY 6-phohofructokinase                       | 9  |                                       | GVVRAALTEGLEVMGIYDGYLGLYEDR    | 22  | 27 | 4  | 25.83 | y3y6y8y10                     | 2959.47 | 56.163  | 29916 | 4 | 740.62  | -4.54  |
| [P65692 K6PF_SALTY 6-phohofructokinase                       | 10 | Carbamidomethyl+C(11)                 | HAIVAITEHMC DVDELAHFIEKET GR   | 215 | 26 | 3  | 22.78 | y6y7y17                       | 3021.46 | 51.354  | 14751 | 3 | 1007.83 | 2.91   |
| [P65692 K6PF_SALTY 6-phohofructokinase                       | 11 |                                       | AALTEGLEVMGIYDGYLGLYEDR MVQLDR | 26  | 29 | 3  | 21.92 | b8y9y10                       | 3290.59 | 89.020  | 3670  | 5 | 658.92  | -5.19  |
| [P65692 K6PF_SALTY 6-phohofructokinase                       | 12 | Carbamidomethyl+C(1); Oxidation+M(21) | CVGIQNEQLVHHDIIDAENMK          | 283 | 22 | 3  | 13.39 | b5y5y15                       | 2592.26 | 117.147 | 5391  | 3 | 864.76  | 3.86   |
| [P65692 K6PF_SALTY 6-phohofructokinase                       | 13 | Oxidation+M(10)                       | AALTEGLEVMGIYDGYLGLYEDR        | 26  | 23 | 3  | 13.01 | b11y5y7                       | 2564.23 | 123.724 | 4243  | 4 | 641.81  | 2.86   |
| [P65692 K6PF_SALTY 6-phohofructokinase                       | 14 |                                       | GGSPVPYDR                      | 253 | 9  | 0  | 1.63  |                               | 929.46  | 33.910  | 2158  | 2 | 465.23  | 14.25  |
| [P67912 HLDD_SALTY ADP-L-glycero-D-manno-heptose-6-epimerase | 1  |                                       | TSDFIESREYEKPLNVYGYSK          | 123 | 21 | 4  | 21.62 | b7b10b14y7                    | 2525.21 | 86.878  | 9968  | 3 | 842.41  | -2.13  |
| [P67912 HLDD_SALTY ADP-L-glycero-D-manno-heptose-6-epimerase | 2  |                                       | QILPEANSQIVGFR                 | 152 | 14 | 5  | 32.92 | b3b13y11*y11y12               | 1571.86 | 69.645  | 8637  | 2 | 786.43  | 2.56   |
| [P67912 HLDD_SALTY ADP-L-glycero-D-manno-heptose-6-epimerase | 3  |                                       | EYEKPLNVYGYSK                  | 131 | 13 | 6  | 29.57 | b9b12y5°y5y7°y7               | 1589.79 | 48.848  | 7254  | 2 | 795.40  | 4.30   |
| [P67912 HLDD_SALTY ADP-L-glycero-D-manno-heptose-6-epimerase | 4  |                                       | AESFQAVADATLAYHKK              | 239 | 17 | 6  | 27.31 | b3b4°b4b13y10y17              | 1849.96 | 60.907  | 2142  | 2 | 925.48  | 6.00   |
| [P67912 HLDD_SALTY ADP-L-glycero-D-manno-heptose-6-epimerase | 5  |                                       | GSMASVAFHLNTQLNNGESPK          | 178 | 21 | 3  | 20.47 | b7b9b15                       | 2202.03 | 75.401  | 5472  | 2 | 1101.52 | -15.30 |
| [P67912 HLDD_SALTY ADP-L-glycero-D-manno-heptose-6-epimerase | 6  |                                       | TSDFIESR                       | 123 | 8  | 4  | 47.96 | b6b7y6y7                      | 954.44  | 76.485  | 3259  | 1 | 954.44  | -8.70  |

|                                                              |    |                       |                                                |     |    |    |       |                                            |         |         |        |   |         |        |
|--------------------------------------------------------------|----|-----------------------|------------------------------------------------|-----|----|----|-------|--------------------------------------------|---------|---------|--------|---|---------|--------|
| [P67912]HLDD_SALTY ADP-L-glycero-D-manno-heptose-6-epimerase | 7  |                       | GSIEYIPFPDK                                    | 256 | 11 | 3  | 24.23 | b5b7y3                                     | 1265.66 | 93.959  | 3153   | 2 | 633.33  | 13.50  |
| [P67912]HLDD_SALTY ADP-L-glycero-D-manno-heptose-6-epimerase | 8  |                       | FVNLVDLNIADYMDK                                | 38  | 15 | 5  | 41.39 | y3y6y9y12°y12                              | 1769.87 | 92.310  | 1647   | 2 | 885.44  | -5.86  |
| [P67912]HLDD_SALTY ADP-L-glycero-D-manno-heptose-6-epimerase | 9  |                       | AESFQAVADATLAYHK                               | 239 | 16 | 8  | 35.32 | b7*b7b9b10°b10y3y13°y13                    | 1721.85 | 85.008  | 1614   | 2 | 861.43  | 0.43   |
| [P67912]HLDD_SALTY ADP-L-glycero-D-manno-heptose-6-epimerase | 10 |                       | NAGYDKPFKTV AEGVTEYMAWL<br>NR                  | 284 | 24 | 3  | 22.96 | b6b11b12                                   | 2760.38 | 101.023 | 20404  | 3 | 920.80  | 13.71  |
| [P67912]HLDD_SALTY ADP-L-glycero-D-manno-heptose-6-epimerase | 11 |                       | TVAEGVTEYMAWLN RDA                             | 293 | 17 | 5  | 16.26 | b8b12°b12y9°y9                             | 1925.89 | 67.103  | 4544   | 2 | 963.45  | -7.16  |
| [P67912]HLDD_SALTY ADP-L-glycero-D-manno-heptose-6-epimerase | 12 |                       | YQAFQTQADLTNLRNAGYDKPFK                        | 271 | 22 | 4  | 20.79 | b11y6y10y13                                | 2561.30 | 94.826  | 2330   | 3 | 854.44  | 8.77   |
| [P67912]HLDD_SALTY ADP-L-glycero-D-manno-heptose-6-epimerase | 13 | Oxidation+M(13)       | FVNLVDLNIADYMDK                                | 38  | 15 | 3  | 18.08 | b12y9y11                                   | 1785.89 | 80.651  | 1626   | 4 | 447.23  | 11.48  |
| [P11003]METF_SALTY 5                                         | 1  |                       | EVADFDISVAAYPEVHPEAK                           | 140 | 20 | 15 | 55.86 | b1b2b3b9°b9b12b20y1y5y<br>7°y7y11y12y19y20 | 2187.03 | 81.405  | 100666 | 3 | 729.68  | -13.28 |
| [P11003]METF_SALTY 5                                         | 2  | Carbamidomethyl+C(11) | TGLEAAPHLTCIDATRDEL R                          | 80  | 20 | 3  | 21.11 | b3b5b9                                     | 2239.10 | 59.873  | 26892  | 3 | 747.04  | -6.00  |
| [P11003]METF_SALTY 5                                         | 3  |                       | FVSVTYGANSGERDR                                | 54  | 15 | 6  | 43    | b8b9*b9y5y8y11                             | 1657.79 | 42.191  | 6178   | 3 | 553.27  | -4.27  |
| [P11003]METF_SALTY 5                                         | 4  |                       | TSEMEQTLWNSIDR                                 | 33  | 14 | 5  | 38.36 | b3b4y2y9y10                                | 1709.81 | 77.865  | 5796   | 2 | 855.41  | 14.99  |
| [P11003]METF_SALTY 5                                         | 5  |                       | GDLPPGSGKPEMYAADLVGLLK                         | 118 | 22 | 5  | 24.15 | b2b3b4b6y13                                | 2228.14 | 109.384 | 4082   | 2 | 1114.57 | -10.19 |
| [P11003]METF_SALTY 5                                         | 6  |                       | EALNQSLAEVQGQINVSFEFFPPR                       | 9   | 24 | 6  | 23.51 | b6b12y1y6y8y18                             | 2720.38 | 112.114 | 3922   | 2 | 1360.69 | 3.68   |
| [P11003]METF_SALTY 5                                         | 7  |                       | GDLPPGSGKPEMYAADLVGLLKE<br>VADFDISVAAYPEVHPEAK | 118 | 42 | 9  | 34.83 | b3b7b8°b8b9°b9y2y7°y7                      | 4396.27 | 113.226 | 2650   | 3 | 1466.09 | 13.55  |
| [P11003]METF_SALTY 5                                         | 8  |                       | AITQFFFDVESYLR                                 | 179 | 14 | 3  | 19.22 | b12y8y13                                   | 1735.87 | 99.837  | 2345   | 3 | 579.30  | 1.55   |
| [P11003]METF_SALTY 5                                         | 9  | Carbamidomethyl+C(11) | TGLEAAPHLTCIDATR                               | 80  | 16 | 3  | 23.63 | b11y11y12                                  | 1725.89 | 101.503 | 4300   | 2 | 863.45  | 20.09  |
| [P11003]METF_SALTY 5                                         | 10 |                       | IPSWMSLMFEGLDNDAETR                            | 230 | 19 | 3  | 22.67 | b8y4y5                                     | 2212.04 | 111.084 | 3320   | 2 | 1106.52 | 16.67  |
| [P11003]METF_SALTY 5                                         | 11 |                       | EGVKDFHFYTLNR                                  | 266 | 13 | 4  | 20.57 | b4b6y8°y8                                  | 1625.82 | 43.579  | 80535  | 2 | 813.41  | 6.38   |
| [P11003]METF_SALTY 5                                         | 12 |                       | AITQFFFDVESYLRFR                               | 179 | 16 | 7  | 60.06 | b7b8b9b11b13y8y10                          | 2039.04 | 58.467  | 12102  | 3 | 680.35  | 0.24   |
| [P11003]METF_SALTY 5                                         | 13 |                       | PPGSGKPEMYAADLVGLLK                            | 121 | 19 | 1  | 7.8   | b9                                         | 1943.05 | 109.436 | 6943   | 2 | 972.03  | 7.73   |
| [P0A1V6]KPRS_SALTY Ribose-phohate pyrophohokinase            | 1  |                       | LFAGNATPELAQR                                  | 5   | 13 | 8  | 52.85 | b3b4b8y6y10*y10y11y13                      | 1387.74 | 54.625  | 21785  | 2 | 694.37  | 1.85   |
| [P0A1V6]KPRS_SALTY Ribose-phohate pyrophohokinase            | 2  |                       | ITAVIPYFGYAR                                   | 84  | 12 | 5  | 32.09 | b4b11y5y7y12                               | 1370.74 | 80.785  | 14589  | 2 | 685.87  | -5.43  |
| [P0A1V6]KPRS_SALTY Ribose-phohate pyrophohokinase            | 3  |                       | VFAYATHPIFSGNAANNLR                            | 243 | 19 | 6  | 29.3  | b2b3b16y8y13y16                            | 2063.02 | 65.818  | 12070  | 3 | 688.34  | -14.08 |
| [P0A1V6]KPRS_SALTY Ribose-phohate pyrophohokinase            | 4  |                       | LYTSLGDAAVGR                                   | 22  | 12 | 4  | 29.41 | b3°b3b4b10                                 | 1222.65 | 80.288  | 4334   | 2 | 611.83  | 8.49   |
| [P0A1V6]KPRS_SALTY Ribose-phohate pyrophohokinase            | 5  | Carbamidomethyl+C(10) | NSVIDEVVVCDTIPLTDEIK                           | 262 | 20 | 4  | 27.81 | b4b7y9y10                                  | 2259.15 | 49.789  | 61084  | 3 | 753.72  | 3.35   |
| [P0A1V6]KPRS_SALTY Ribose-phohate pyrophohokinase            | 6  |                       | ANVSQVMHIIGDVAGR                               | 198 | 16 | 5  | 35.32 | b3b7y5y6y15                                | 1666.86 | 79.508  | 2603   | 2 | 833.93  | -7.84  |
| [P0A1V6]KPRS_SALTY Ribose-phohate pyrophohokinase            | 7  | Carbamidomethyl+C(11) | GGDIFIQSTCAPTNDNLMELVVM<br>VDALR               | 49  | 29 | 8  | 25.91 | b5b9°b9°b9b10°b10b14y2<br>1                | 3192.63 | 136.379 | 1550   | 4 | 798.91  | 17.13  |
| [P0A1V6]KPRS_SALTY Ribose-phohate pyrophohokinase            | 8  |                       | LLNDTDMAIIDKR                                  | 182 | 13 | 6  | 32.21 | b3b6°b6b7°b7y4                             | 1517.79 | 40.243  | 19201  | 3 | 506.60  | -5.87  |

|                                                      |    |                       |                                           |     |    |    |       |                           |         |         |       |   |         |        |
|------------------------------------------------------|----|-----------------------|-------------------------------------------|-----|----|----|-------|---------------------------|---------|---------|-------|---|---------|--------|
| P0A1V6 KPRS_SALTY Ribose-phohate pyrophohokinase     | 9  | Phosphoryl STY(5)     | TLTLSGMLAEAIRR                            | 288 | 14 | 3  | 24.66 | b5y9y10                   | 1611.81 | 56.644  | 3927  | 3 | 537.94  | -6.89  |
| P0A1V6 KPRS_SALTY Ribose-phohate pyrophohokinase     | 10 |                       | YATHPIFSGNAANNLR                          | 246 | 16 | 3  | 20.94 | b10°b10b11                | 1745.86 | 65.816  | 8341  | 2 | 873.43  | -8.88  |
| P0A1V6 KPRS_SALTY Ribose-phohate pyrophohokinase     | 11 |                       | THPIFSGNAANNLR                            | 248 | 14 | 1  | 7.43  | b12                       | 1511.75 | 65.772  | 3820  | 2 | 756.38  | -14.78 |
| P22107 TRAT_SALTY TraT complement resistance protein | 1  |                       | NTSDKDMSDLQSLIAK                          | 58  | 16 | 5  | 17.1  | b9y2y3y5y16               | 1765.84 | 66.254  | 67016 | 3 | 589.29  | -12.17 |
| P22107 TRAT_SALTY TraT complement resistance protein | 2  |                       | FEEAKPVLEEQLAK                            | 223 | 14 | 8  | 27.48 | b2b3°b3b10y2y6y9y14       | 1630.86 | 54.055  | 42442 | 3 | 544.29  | -7.63  |
| P22107 TRAT_SALTY TraT complement resistance protein | 3  |                       | ATVTTDNVAALR                              | 177 | 12 | 9  | 68.77 | b9y1y3y5y8°y8y9y10y12     | 1231.65 | 46.294  | 41079 | 2 | 616.33  | -7.43  |
| P22107 TRAT_SALTY TraT complement resistance protein | 4  |                       | GYTVVTSPDK                                | 79  | 10 | 10 | 70.38 | b2b7b9y2°y2y4y5y6y7y10    | 1066.53 | 36.946  | 10424 | 2 | 533.77  | -8.24  |
| P22107 TRAT_SALTY TraT complement resistance protein | 5  | Carbamidomethyl+C(16) | LMMVTLVSSTLALSGCGAMSTAIK                  | 5   | 24 | 3  | 22.96 | b3b9b10                   | 2442.28 | 81.958  | 19269 | 3 | 814.77  | 14.30  |
| P22107 TRAT_SALTY TraT complement resistance protein | 6  |                       | IQTSTETGNQHK                              | 196 | 12 | 3  | 29.41 | y5y6y10                   | 1343.63 | 15.159  | 9771  | 3 | 448.55  | -21.62 |
| P22107 TRAT_SALTY TraT complement resistance protein | 7  |                       | DIQAKGYTVVTSPDK                           | 74  | 15 | 4  | 26.16 | b3°b3b7b9                 | 1621.83 | 90.570  | 4064  | 2 | 811.42  | -11.21 |
| P22107 TRAT_SALTY TraT complement resistance protein | 8  | Carbamidomethyl+C(16) | LMMVTLVSSTLALSGCGAMSTAIKK                 | 5   | 25 | 3  | 12.37 | b10y10y14                 | 2570.32 | 76.020  | 3991  | 4 | 643.33  | -9.97  |
| P22107 TRAT_SALTY TraT complement resistance protein | 9  |                       | IQTSTETGNQHKEYQTR                         | 196 | 16 | 7  | 27.58 | b8°b8y7°y7°y7y9y11        | 1891.91 | 86.458  | 2501  | 3 | 631.31  | -10.90 |
| P22107 TRAT_SALTY TraT complement resistance protein | 10 |                       | GYTVVTSPDKAYYWIQANVLK                     | 79  | 21 | 5  | 21.62 | b4°b4b10b14y11            | 2416.28 | 103.628 | 2143  | 2 | 1208.64 | 9.70   |
| P06196 USHA_SALTY Silent protein ushA(0)             | 1  | Carbamidomethyl+C(20) | SLPAGSLAMIVGHSQDPVCMAS ENKK               | 238 | 27 | 9  | 22.49 | b2b16y1y2y9y10°y10°y10y25 | 2784.31 | 70.909  | 31637 | 4 | 696.83  | -14.99 |
| P06196 USHA_SALTY Silent protein ushA(0)             | 2  |                       | EVAQEGGSVLLLSGGDINTGVPESDLQDAEPDFR        | 68  | 34 | 5  | 10.97 | b2b3y4y9y34               | 3514.69 | 80.256  | 29344 | 3 | 1172.24 | 3.33   |
| P06196 USHA_SALTY Silent protein ushA(0)             | 3  |                       | IAVIGLTTDDTAK                             | 164 | 13 | 4  | 32.21 | b3y9y10y12                | 1317.72 | 61.374  | 21912 | 2 | 659.36  | -3.06  |
| P06196 USHA_SALTY Silent protein ushA(0)             | 4  |                       | GMNLIGYDAMAVGNHEFDNPLTVLR                 | 102 | 25 | 8  | 31.85 | b6°b6b8b9b14y1y12y14      | 2747.36 | 98.815  | 20326 | 3 | 916.46  | 11.37  |
| P06196 USHA_SALTY Silent protein ushA(0)             | 5  |                       | VLYTPEIAENPQMLSLLTPFQNK                   | 332 | 23 | 6  | 26.45 | b2b9b12y2y5y6             | 2646.38 | 101.018 | 10306 | 3 | 882.80  | -1.38  |
| P06196 USHA_SALTY Silent protein ushA(0)             | 6  |                       | VQPFGNIVVYADMSGK                          | 425 | 16 | 3  | 17.1  | b3b11y13                  | 1724.85 | 87.011  | 6624  | 3 | 575.62  | -9.41  |
| P06196 USHA_SALTY Silent protein ushA(0)             | 7  |                       | IGSVNGLLEGDR                              | 363 | 12 | 5  | 29.41 | y5°y5y10y11y12            | 1229.66 | 54.337  | 6065  | 2 | 615.34  | 13.00  |
| P06196 USHA_SALTY Silent protein ushA(0)             | 8  |                       | IGNPEYFTDIEFR                             | 177 | 13 | 3  | 25.34 | b3y8y9                    | 1600.76 | 77.850  | 4878  | 3 | 534.26  | -0.76  |
| P06196 USHA_SALTY Silent protein ushA(0)             | 9  |                       | DSIEAGDITYK                               | 410 | 11 | 7  | 47.6  | b3b4b9°b9y3y6y11          | 1211.59 | 42.176  | 4802  | 2 | 606.30  | 5.74   |
| P06196 USHA_SALTY Silent protein ushA(0)             | 10 |                       | MATLSFNATGGDGYPR                          | 492 | 16 | 5  | 41.18 | b6b7y3y6y13               | 1657.76 | 81.443  | 3675  | 2 | 829.38  | -4.71  |
| P06196 USHA_SALTY Silent protein ushA(0)             | 11 |                       | ITILHTNDHHGHFWR                           | 33  | 15 | 4  | 29.35 | b12y5y7y8                 | 1883.96 | 67.117  | 2627  | 3 | 628.66  | 12.12  |
| P06196 USHA_SALTY Silent protein ushA(0)             | 12 |                       | EFIQNSPLDAAFTPNGEVSWL                     | 527 | 23 | 4  | 13.01 | b9y2y5y14                 | 2534.25 | 107.955 | 1506  | 2 | 1267.63 | 10.69  |
| P06196 USHA_SALTY Silent protein ushA(0)             | 13 |                       | VVIQELNMNEKPDVIAHTTHMGHYDNGDHGSNAPGDVEMAR | 197 | 41 | 8  | 15.09 | b8°b8°b8b21y4y12°y12y14   | 4475.04 | 69.532  | 23419 | 6 | 746.68  | -9.49  |
| P06196 USHA_SALTY Silent protein ushA(0)             | 14 | Carbamidomethyl+C(10) | QVNYVPGTPCAPDK                            | 265 | 14 | 6  | 39.7  | b7b10b12y5°y5y10          | 1545.71 | 70.352  | 12811 | 3 | 515.91  | -18.80 |
| P06196 USHA_SALTY Silent protein ushA(0)             | 15 |                       | ADFEFR                                    | 297 | 6  | 1  | 13.6  | b3                        | 784.37  | 79.896  | 2959  | 1 | 784.37  | 7.86   |
| P06196 USHA_SALTY Silent protein ushA(0)             | 16 |                       | FVQTNMGR                                  | 379 | 8  | 5  | 40.79 | b4°b4b5°b5b6              | 952.48  | 70.949  | 2581  | 2 | 476.74  | 14.67  |

|                                                          |    |                       |                                          |     |    |    |       |                             |         |         |        |   |         |        |
|----------------------------------------------------------|----|-----------------------|------------------------------------------|-----|----|----|-------|-----------------------------|---------|---------|--------|---|---------|--------|
| [P06196]USHA_SALTY Silent protein ushA(0)                | 17 |                       | STGER                                    | 145 | 5  | 1  | 13.19 | b4                          | 549.26  | 58.513  | 2090   | 1 | 549.26  | -4.33  |
| [P06196]USHA_SALTY Silent protein ushA(0)                | 18 |                       | ADFEFRNGEMK                              | 297 | 11 | 5  | 35.2  | b3b8y5y7°y7                 | 1343.62 | 63.787  | 2811   | 3 | 448.54  | 9.63   |
| [P06196]USHA_SALTY Silent protein ushA(0)                | 19 |                       | FPFLYANIYQKSTGER                         | 134 | 16 | 5  | 24.8  | y4°y4y6y8*y8                | 1934.00 | 137.633 | 2134   | 2 | 967.50  | 8.84   |
| [P06196]USHA_SALTY Silent protein ushA(0)                | 20 | Carbamidomethyl+C(11) | KQVNYVPGTPCAPDK                          | 264 | 15 | 8  | 85.61 | y3y7°y7y9y10y12y13y14       | 1673.84 | 88.671  | 1701   | 2 | 837.42  | 3.21   |
| [P06196]USHA_SALTY Silent protein ushA(0)                | 21 | Phosphoryl STY(7)     | IAVIGLTTDDTAK                            | 164 | 13 | 3  | 20.57 | b7y5y12                     | 1397.68 | 58.447  | 7358   | 2 | 699.34  | -5.41  |
| [P06196]USHA_SALTY Silent protein ushA(0)                | 22 | Phosphoryl STY(5)     | TLVDSIRK                                 | 60  | 8  | 4  | 40.79 | y3y4y6°y6                   | 1011.51 | 55.667  | 2916   | 2 | 506.26  | -8.81  |
| [P06196]USHA_SALTY Silent protein ushA(0)                | 23 | Oxidation+M(12)       | EVVDYLTAVAQMKPDSGAYPQL<br>ANVSFVAKEGK    | 441 | 33 | 3  | 22.18 | b11b12y5                    | 3541.81 | 94.597  | 1816   | 4 | 886.21  | 7.44   |
| [P06196]USHA_SALTY Silent protein ushA(0)                | 24 |                       | SLPAGSLAMIVGGHSQDPV                      | 238 | 19 | 5  | 17.95 | y4*y4y8y13°y13              | 1835.95 | 70.907  | 8162   | 2 | 918.48  | 12.43  |
| [Q8ZQR4]6PGL_SALTY 6-phohogluconolactonase               | 1  | Carbamidomethyl+C(19) | LQDGLPVELVDVVEGLDGCHSAN<br>ITPDNR        | 110 | 29 | 10 | 52.66 | b2b3b4b5y4°y4y8y9y24y29     | 3132.56 | 102.498 | 18626  | 3 | 1044.86 | 10.52  |
| [Q8ZQR4]6PGL_SALTY 6-phohogluconolactonase               | 2  | Carbamidomethyl+C(8)  | NPHGEIECVQTLDMMPADFSDTR                  | 206 | 23 | 7  | 39.9  | b2b9b10b11y5y7y23           | 2663.17 | 78.692  | 15088  | 3 | 888.40  | 7.61   |
| [Q8ZQR4]6PGL_SALTY 6-phohogluconolactonase               | 3  |                       | YAVGQGPMWVVVNAY                          | 316 | 15 | 4  | 25.7  | b5b8y3y5                    | 1653.78 | 41.148  | 34111  | 3 | 551.93  | -20.30 |
| [Q8ZQR4]6PGL_SALTY 6-phohogluconolactonase               | 4  |                       | WAADIHTPDGR                              | 229 | 12 | 4  | 32.42 | y3y5°y5y7                   | 1351.66 | 93.134  | 22184  | 2 | 676.33  | -13.55 |
| [Q8ZQR4]6PGL_SALTY 6-phohogluconolactonase               | 5  | Carbamidomethyl+C(2)  | ICLFTLSDDGHLVAQEPAEVNTVE<br>GAGPR        | 150 | 29 | 5  | 22.08 | b12b13°b13b19y11            | 3095.52 | 79.677  | 6750   | 3 | 1032.51 | 1.74   |
| [Q8ZQR4]6PGL_SALTY 6-phohogluconolactonase               | 6  |                       | SHHIAVYEITGTQGLLTEK                      | 295 | 19 | 3  | 21.84 | b6b10b12                    | 2097.06 | 84.640  | 6215   | 2 | 1049.04 | -15.60 |
| [Q8ZQR4]6PGL_SALTY 6-phohogluconolactonase               | 7  | Carbamidomethyl+C(5)  | QYAYCVNELNSSVDVWQLK                      | 187 | 19 | 3  | 24.06 | b3b4b13                     | 2316.08 | 69.589  | 3971   | 4 | 579.78  | -6.22  |
| [Q8ZQR4]6PGL_SALTY 6-phohogluconolactonase               | 8  |                       | TASLITVFSVSEDSGVSLSVEGFQPT<br>EAQPR      | 248 | 30 | 3  | 11.36 | b11y5y7                     | 3151.58 | 117.741 | 2491   | 3 | 1051.20 | -1.39  |
| [Q8ZQR4]6PGL_SALTY 6-phohogluconolactonase               | 9  |                       | FVFVGSYNAGNVSVTR                         | 94  | 16 | 8  | 55.31 | b3b7b10°b10y6y9y12y13       | 1716.90 | 113.264 | 2143   | 2 | 858.96  | 19.27  |
| [Q8ZQR4]6PGL_SALTY 6-phohogluconolactonase               | 10 | Carbamidomethyl+C(2)  | ICLFTLSDDGHLVAQEPAEVNTVE<br>GAGPRHMFHPNR | 150 | 37 | 4  | 10.87 | b8°b8b13y8                  | 4113.96 | 97.390  | 171144 | 5 | 823.60  | -11.16 |
| [Q8ZQR4]6PGL_SALTY 6-phohogluconolactonase               | 11 | Carbamidomethyl+C(5)  | QDRICLFTLSDDGHLVAQEPAEVN<br>TVEGAGPR     | 147 | 32 | 3  | 11.13 | b7b10y9                     | 3494.69 | 64.292  | 6633   | 4 | 874.43  | -0.84  |
| [Q8ZQR4]6PGL_SALTY 6-phohogluconolactonase               | 12 |                       | VLAYRIAPDDGALTFAAESALPGS<br>PTHISTDHHGR  | 59  | 35 | 3  | 10.92 | b5y6y14                     | 3643.88 | 101.193 | 3565   | 4 | 911.73  | 14.74  |
| [P20753]PPIA_SALTY Peptidyl-prolyl cis-trans isomerase A | 1  |                       | NFVDYVNSGFYNNTTFHR                       | 54  | 18 | 9  | 47.23 | b2y8y10*y10y11y12*y12y16y18 | 2194.99 | 75.012  | 40885  | 3 | 732.33  | -1.89  |
| [P20753]PPIA_SALTY Peptidyl-prolyl cis-trans isomerase A | 2  |                       | TADKDSATSQFFINVADNAFLDH<br>GQR           | 116 | 26 | 5  | 22.78 | b1y4y10y11°y11              | 2868.33 | 86.081  | 27978  | 4 | 717.84  | -7.06  |
| [P20753]PPIA_SALTY Peptidyl-prolyl cis-trans isomerase A | 3  |                       | VIPGFMIQGGGFNEQMQQK                      | 72  | 19 | 9  | 33.24 | b2b6b9b13b14y1y5*y5y19      | 2109.00 | 70.381  | 15286  | 2 | 1055.00 | -12.27 |
| [P20753]PPIA_SALTY Peptidyl-prolyl cis-trans isomerase A | 4  |                       | TADKDSATSQFFINVADNAFLDH<br>GQRDFGYAVFGK  | 116 | 35 | 6  | 34.75 | b6b7y3y12*y12y13            | 3852.80 | 95.481  | 13771  | 5 | 771.37  | -5.26  |
| [P20753]PPIA_SALTY Peptidyl-prolyl cis-trans isomerase A | 5  |                       | GDPHVLLTTSAGNIELENSQK                    | 26  | 22 | 4  | 22.14 | b13y8*y8y9                  | 2336.19 | 110.572 | 2564   | 2 | 1168.60 | -9.30  |
| [P20753]PPIA_SALTY Peptidyl-prolyl cis-trans isomerase A | 6  |                       | GMDVADKISQVPTHDVGPYQNV<br>PTKPVVILSAK    | 154 | 33 | 7  | 31.99 | b3b10y3y5y8y11y31           | 3503.84 | 68.876  | 104617 | 4 | 876.72  | -3.97  |
| [P20753]PPIA_SALTY Peptidyl-prolyl cis-trans isomerase A | 7  |                       | DSATSQFFINVADNAFLDHGQRD<br>FGYAVFGK      | 120 | 31 | 3  | 11.23 | b9b13y6                     | 3437.64 | 91.735  | 3385   | 3 | 1146.55 | 7.10   |
| [P20753]PPIA_SALTY Peptidyl-prolyl cis-trans isomerase A | 8  |                       | APVSVKNFVDYVNSGFYNNTTFH<br>R             | 48  | 24 | 3  | 21.96 | b12b13y8                    | 2776.32 | 100.957 | 2600   | 4 | 694.83  | -11.08 |
| [P20753]PPIA_SALTY Peptidyl-prolyl cis-trans isomerase A | 9  |                       | TADKDSATSQFFINVADNAFLDH<br>GQR           | 116 | 26 | 9  | 55.4  | b3b9b11*b11b12b13b14y8*y8   | 2868.35 | 92.139  | 1969   | 3 | 956.79  | -1.19  |



|                                                   |    |                       |                                                |     |    |    |       |                                      |         |         |       |   |         |        |
|---------------------------------------------------|----|-----------------------|------------------------------------------------|-----|----|----|-------|--------------------------------------|---------|---------|-------|---|---------|--------|
| P66764 METK_SALTY S-adenosylmethionine synthetase | 1  |                       | SLQEAVMEEIIPILPSEWLNSTK                        | 197 | 25 | 15 | 75.59 | b1b2b3*b3b4*b4b5b6b8b11y3y8y9y12*y12 | 2856.52 | 111.216 | 28695 | 3 | 952.84  | 4.53   |
| P66764 METK_SALTY S-adenosylmethionine synthetase | 2  | Carbamidomethyl+C(10) | FVIGGPMGDCGLTGR                                | 230 | 15 | 4  | 18.08 | b5y3y5y15                            | 1536.74 | 69.251  | 18291 | 2 | 768.88  | 8.58   |
| P66764 METK_SALTY S-adenosylmethionine synthetase | 3  | Carbamidomethyl+C(10) | FVIGGPMGDCGLTGRK                               | 230 | 16 | 3  | 17.1  | b6y6y9                               | 1664.81 | 62.655  | 15204 | 3 | 555.61  | -8.07  |
| P66764 METK_SALTY S-adenosylmethionine synthetase | 4  |                       | ADPLEQGAGDQGLMFGYATNETDVLMPAPITYAHR            | 109 | 35 | 5  | 10.92 | b1b9b15y10°y10                       | 3749.76 | 84.505  | 10284 | 4 | 938.19  | -0.46  |
| P66764 METK_SALTY S-adenosylmethionine synthetase | 5  |                       | IIVDTYGGMAR                                    | 246 | 11 | 5  | 55.84 | b9y5y6y7y8                           | 1195.61 | 53.255  | 6810  | 2 | 598.31  | -6.43  |
| P66764 METK_SALTY S-adenosylmethionine synthetase | 6  |                       | HLFTSESVSEGHDPK                                | 3   | 15 | 6  | 18.08 | b3y2y5°y6y10°y10                     | 1669.79 | 43.547  | 3479  | 2 | 835.40  | 4.75   |
| P66764 METK_SALTY S-adenosylmethionine synthetase | 7  |                       | FFINPTGR                                       | 222 | 8  | 4  | 33.01 | b7*b7y4y5                            | 951.50  | 60.973  | 23954 | 2 | 476.26  | -1.60  |
| P66764 METK_SALTY S-adenosylmethionine synthetase | 8  | Carbamidomethyl+C(16) | EIGYVHSDMGFDANSCAVLSAIGK                       | 74  | 24 | 3  | 21.96 | b14y11y12                            | 2541.18 | 87.968  | 6516  | 3 | 847.73  | 2.79   |
| P66764 METK_SALTY S-adenosylmethionine synthetase | 9  | Carbamidomethyl+C(1)  | CEIQVSYAIGVAEPTSIMVETFGTEK                     | 294 | 26 | 6  | 36.15 | b5b6°b6b13y3y4                       | 2859.36 | 93.884  | 5063  | 3 | 953.79  | -7.60  |
| P66764 METK_SALTY S-adenosylmethionine synthetase | 10 |                       | QSPDINQGVDR                                    | 98  | 11 | 5  | 24.23 | b4b9*b9y9°y9                         | 1228.59 | 44.121  | 4594  | 2 | 614.80  | -4.47  |
| P66764 METK_SALTY S-adenosylmethionine synthetase | 11 |                       | SAAYAARYVAK                                    | 273 | 11 | 3  | 24.23 | b7b10y8                              | 1170.64 | 44.310  | 20379 | 2 | 585.82  | 9.70   |
| P66764 METK_SALTY S-adenosylmethionine synthetase | 12 |                       | QSPDINQGVDRADPLEQGAGDQGLMFGYATNETDVLMPAPITYAHR | 98  | 46 | 3  | 24.55 | y4y9y10                              | 4959.36 | 88.283  | 17233 | 4 | 1240.60 | 5.81   |
| P66764 METK_SALTY S-adenosylmethionine synthetase | 13 |                       | SLQEAVMEEIIPILPSEWLNSTKFFINPTGR                | 197 | 33 | 5  | 21.56 | b3°b3b7b8y13                         | 3788.96 | 113.187 | 9465  | 4 | 948.00  | -8.57  |
| P66764 METK_SALTY S-adenosylmethionine synthetase | 14 |                       | SQVTFQYDDGKIVIGIDAVVLSTQHAEDIDQK               | 166 | 31 | 3  | 11.23 | b11b17y14                            | 3419.74 | 79.632  | 4094  | 4 | 855.69  | 13.56  |
| P66764 METK_SALTY S-adenosylmethionine synthetase | 15 |                       | TGMVLVGGEITTSAWVDIEETRNTVR                     | 47  | 27 | 4  | 27.08 | b7b9b11b12                           | 2947.51 | 106.103 | 3712  | 3 | 983.18  | -1.74  |
| P66764 METK_SALTY S-adenosylmethionine synthetase | 16 | Carbamidomethyl+C(20) | NTVREIGYVHSDMGFDANSCAVLSAIGK                   | 70  | 28 | 5  | 22.7  | b9°b9b12*b12b13                      | 3011.40 | 93.760  | 2489  | 2 | 1506.20 | -12.65 |
| P66764 METK_SALTY S-adenosylmethionine synthetase | 17 |                       | MAKHLFTSESVSEGHDPK                             | 0   | 18 | 5  | 26.5  | b12°b12y4y5y10                       | 1999.96 | 105.664 | 2027  | 3 | 667.33  | 4.76   |
| P66764 METK_SALTY S-adenosylmethionine synthetase | 18 | Phosphoryl STY(8)     | EFFDLRPYGLIQLDLLHPIYK                          | 331 | 22 | 3  | 34.73 | b5b6b7                               | 2801.39 | 99.815  | 2352  | 4 | 701.10  | -6.80  |
| P66764 METK_SALTY S-adenosylmethionine synthetase | 19 | Oxidation+M(13)       | EFFDLRPYGLIQLDLLHPIYK                          | 331 | 22 | 4  | 13.39 | b12°b12y11y13                        | 2737.46 | 97.013  | 3035  | 3 | 913.16  | 5.08   |
| P66764 METK_SALTY S-adenosylmethionine synthetase | 20 | Oxidation+M(14)       | ADPLEQGAGDQGLMFGYATNETDVLMPAPITYAHR            | 109 | 35 | 3  | 16.63 | y5y10y12                             | 3765.79 | 99.822  | 1691  | 3 | 1255.93 | 9.21   |
| O54296 RS11_SALTY 30S ribosomal protein S11       | 1  |                       | STPFAAQVAAER                                   | 57  | 12 | 5  | 29.41 | y6y8y9y12*y12                        | 1247.64 | 50.351  | 18946 | 2 | 624.33  | 5.48   |
| O54296 RS11_SALTY 30S ribosomal protein S11       | 2  |                       | ALNAAGFR                                       | 98  | 8  | 5  | 40.79 | y4y5y6*y6y8                          | 819.45  | 42.675  | 14566 | 2 | 410.23  | 2.53   |
| O54296 RS11_SALTY 30S ribosomal protein S11       | 3  |                       | QVSDGVAHIHASFNNITIVTITDR                       | 14  | 23 | 5  | 23.09 | b3*b3b6b7°b7                         | 2495.27 | 112.728 | 11292 | 3 | 832.43  | 0.78   |
| O54296 RS11_SALTY 30S ribosomal protein S11       | 4  | Carbamidomethyl+C(15) | ITNITDVTPIPHNGCRPPK                            | 106 | 19 | 6  | 35    | b3*b3y5y7y11y13                      | 2130.12 | 89.725  | 1869  | 3 | 710.71  | 3.21   |
| O54296 RS11_SALTY 30S ribosomal protein S11       | 5  | Carbamidomethyl+C(15) | ITNITDVTPIPHNGCRPPKK                           | 106 | 20 | 5  | 22.54 | b4b6°b6b12y6                         | 2258.18 | 90.587  | 6308  | 2 | 1129.59 | -12.76 |
| P37412 LEU3_SALTY 3-isopropylmalate dehydrogenase | 1  |                       | NIANPIAQILSLALLLR                              | 293 | 17 | 9  | 42.61 | b2b3b6y1y5y7y8y13y17                 | 1833.14 | 137.281 | 6223  | 2 | 917.08  | 5.93   |
| P37412 LEU3_SALTY 3-isopropylmalate dehydrogenase | 2  | Carbamidomethyl+C(9)  | LYQGLEAFCPLR                                   | 112 | 12 | 6  | 51.02 | b5b9b11°b11y5y6                      | 1466.74 | 62.938  | 5508  | 3 | 489.58  | -5.66  |
| P37412 LEU3_SALTY 3-isopropylmalate dehydrogenase | 3  |                       | TYPDVELAHMYIDNATMQLIK                          | 214 | 21 | 3  | 12.68 | b4°b4b9                              | 2466.20 | 99.851  | 2306  | 2 | 1233.60 | -1.88  |
| P37412 LEU3_SALTY 3-isopropylmalate dehydrogenase | 4  |                       | ITTSHYDVGGIAIDNHHGHLPK                         | 37  | 22 | 5  | 28.85 | b9b12b13y11y19                       | 2342.24 | 55.641  | 65747 | 5 | 469.25  | 20.95  |

|                                                   |    |                       |                                   |     |    |    |       |                                                  |         |         |       |   |         |        |
|---------------------------------------------------|----|-----------------------|-----------------------------------|-----|----|----|-------|--------------------------------------------------|---------|---------|-------|---|---------|--------|
| P37412 LEU3_SALTY 3-isopropylmalate dehydrogenase | 5  |                       | AFDTEVYHR                         | 160 | 9  | 3  | 30.41 | b5b7y3                                           | 1137.53 | 58.049  | 13253 | 2 | 569.27  | -5.37  |
| P37412 LEU3_SALTY 3-isopropylmalate dehydrogenase | 6  |                       | GAAAVSTDEMGDIAR                   | 341 | 16 | 4  | 23.63 | b3b4y11°y11                                      | 1576.78 | 62.642  | 6021  | 2 | 788.89  | 10.14  |
| P37412 LEU3_SALTY 3-isopropylmalate dehydrogenase | 7  |                       | NYHIAVLPGDGIGPEVMAQALK            | 3   | 22 | 4  | 18.1  | b4b6y6y13                                        | 2293.15 | 108.743 | 3742  | 3 | 765.06  | -20.97 |
| P37412 LEU3_SALTY 3-isopropylmalate dehydrogenase | 8  |                       | VMDAVR                            | 25  | 6  | 1  | 13.6  | y5                                               | 690.35  | 32.986  | 3078  | 1 | 690.35  | -11.94 |
| P37412 LEU3_SALTY 3-isopropylmalate dehydrogenase | 9  | Carbamidomethyl+C(6)  | ATVEGCEQADAILFGSVGGPK             | 59  | 21 | 3  | 20.47 | b4b6b15                                          | 2106.02 | 76.612  | 2459  | 3 | 702.68  | 1.39   |
| P37412 LEU3_SALTY 3-isopropylmalate dehydrogenase | 10 | Carbamidomethyl+C(12) | ADIAANGFDILCVR                    | 124 | 14 | 6  | 30.65 | b3°b3b10b11°b11y10                               | 1534.74 | 73.217  | 2420  | 2 | 767.87  | -18.69 |
| P37412 LEU3_SALTY 3-isopropylmalate dehydrogenase | 11 |                       | ALEEGVRTGDLAR                     | 328 | 13 | 3  | 20.57 | b3b11y6                                          | 1386.75 | 49.758  | 7531  | 3 | 462.92  | 8.63   |
| P37412 LEU3_SALTY 3-isopropylmalate dehydrogenase | 12 |                       | TGDLARGAAAVSTDEMGDIAR             | 335 | 22 | 4  | 29.3  | b4b14b16b17                                      | 2190.09 | 92.541  | 2390  | 3 | 730.70  | 2.34   |
| P37412 LEU3_SALTY 3-isopropylmalate dehydrogenase | 13 |                       | WENLPPESQPERGALLPLR               | 80  | 19 | 8  | 38.04 | b3°b3b7°b7°b7b8°b8b9                             | 2202.16 | 69.565  | 2249  | 3 | 734.72  | -3.77  |
| P37412 LEU3_SALTY 3-isopropylmalate dehydrogenase | 14 |                       | DVELAHMYIDNATMQLIK                | 217 | 18 | 2  | 12.68 | b7b9                                             | 2105.07 | 99.803  | 5074  | 2 | 1053.04 | 12.99  |
| P0A1B7 ATPE_SALTY ATP synthase epsilon chain      | 1  |                       | IQVTGSEGELGIYPGHAPLLTAIKP<br>GMIR | 23  | 29 | 18 | 69.52 | b2°b2b3b4b8°b8b16°b16y1y2y5y12y13y16y19y26y27y29 | 3018.62 | 82.063  | 91891 | 4 | 755.41  | -8.98  |
| P0A1B7 ATPE_SALTY ATP synthase epsilon chain      | 2  |                       | AMTYHLDVVSAEQQMFSGLVEK            | 1   | 22 | 8  | 32.9  | b5b8b11y3y8°y8y13y22                             | 2483.19 | 90.397  | 27158 | 3 | 828.40  | -1.47  |
| P0A1B7 ATPE_SALTY ATP synthase epsilon chain      | 3  |                       | MAMTYHLDVVSAEQQMFSGLVE<br>K       | 0   | 23 | 4  | 22.04 | b10y10°y10y11                                    | 2614.27 | 117.183 | 1525  | 3 | 872.09  | 12.89  |
| P0A1B7 ATPE_SALTY ATP synthase epsilon chain      | 4  |                       | SSHGDVDYAQASAELAK                 | 107 | 17 | 4  | 22.84 | b5b15y6y8                                        | 1748.79 | 46.062  | 15270 | 3 | 583.60  | -10.26 |
| P0A1B7 ATPE_SALTY ATP synthase epsilon chain      | 5  | Oxidation+M()         | AMTYHLDVVSAEQQMFSGLVEK            | 1   | 22 | 3  | 22.14 | b10b11y5                                         | 2499.20 | 97.967  | 1767  | 3 | 833.74  | 3.71   |
| O86090 PPK_SALTY Polyphohate kinase               | 1  |                       | IIDSMIAAHNGK                      | 381 | 13 | 9  | 59.17 | b5b9y7°y7y8°y8y10y11y13                          | 1406.71 | 78.700  | 27816 | 2 | 703.86  | -9.81  |
| O86090 PPK_SALTY Polyphohate kinase               | 2  |                       | VLQEAADK                          | 20  | 8  | 9  | 49.21 | b1b4°b4y3y4°y4y5°y5y8                            | 873.47  | 32.470  | 15511 | 2 | 437.24  | -2.93  |
| O86090 PPK_SALTY Polyphohate kinase               | 3  |                       | YHNFKDFINFPNVGK                   | 293 | 15 | 4  | 18.08 | b2b6b11y7                                        | 1839.92 | 66.130  | 11026 | 3 | 613.98  | -1.46  |
| O86090 PPK_SALTY Polyphohate kinase               | 4  |                       | VFNFIENPYRPVTFDYLMVSPQNS<br>RR    | 486 | 26 | 11 | 57.01 | b1b3b4°b4b7b8b12b24y5y12y22                      | 3189.62 | 109.352 | 7115  | 3 | 1063.88 | 8.42   |
| O86090 PPK_SALTY Polyphohate kinase               | 5  |                       | DMPAALVDVLREK                     | 266 | 13 | 3  | 29.82 | b4b6b11                                          | 1456.79 | 94.721  | 4079  | 2 | 728.90  | 4.86   |
| O86090 PPK_SALTY Polyphohate kinase               | 6  |                       | VFNFIENPYRPVTFDYLMVSPQNS<br>R     | 486 | 25 | 6  | 18.77 | b13°b13y3y6y9°y9                                 | 3033.44 | 94.998  | 14292 | 3 | 1011.82 | -18.59 |
| O86090 PPK_SALTY Polyphohate kinase               | 7  |                       | FLGIYSNNLDEFYK                    | 37  | 14 | 3  | 19.22 | b6y3y6                                           | 1722.86 | 74.189  | 11412 | 3 | 574.96  | 11.76  |
| O86090 PPK_SALTY Polyphohate kinase               | 8  |                       | VQAQLAIYDYIK                      | 670 | 12 | 5  | 26.19 | b9b10y11°y11°y11                                 | 1424.80 | 66.622  | 11378 | 2 | 712.91  | 17.91  |
| O86090 PPK_SALTY Polyphohate kinase               | 9  |                       | ADQEFDGLYNELLEMAR                 | 86  | 18 | 5  | 26.5  | b13y5y6y13°y13                                   | 2127.04 | 96.990  | 10458 | 2 | 1064.02 | 16.30  |
| O86090 PPK_SALTY Polyphohate kinase               | 10 |                       | VYIFENGSDK                        | 594 | 10 | 5  | 33.82 | b5°b5b6b8°b8                                     | 1141.56 | 56.643  | 9354  | 2 | 571.28  | 7.06   |
| O86090 PPK_SALTY Polyphohate kinase               | 11 |                       | QLSVNQSWLR                        | 113 | 11 | 3  | 35.99 | b5b6b7                                           | 1358.72 | 47.456  | 4873  | 2 | 679.86  | 1.80   |
| O86090 PPK_SALTY Polyphohate kinase               | 12 |                       | YDSIVPGGR                         | 284 | 9  | 4  | 45.36 | b4b5b8y7                                         | 963.47  | 105.270 | 3202  | 1 | 963.47  | -15.90 |
| O86090 PPK_SALTY Polyphohate kinase               | 13 |                       | HLWFDK                            | 320 | 6  | 1  | 13.6  | y3                                               | 845.44  | 42.648  | 2160  | 1 | 845.44  | 12.49  |
| O86090 PPK_SALTY Polyphohate kinase               | 14 |                       | DAEYDLVHEMESSLMELMSSSLK           | 229 | 23 | 3  | 13.01 | b6b9y7                                           | 2644.21 | 136.193 | 1830  | 4 | 661.81  | 8.49   |

|                                     |    |                    |                             |     |    |   |       |                          |         |         |       |   |         |        |
|-------------------------------------|----|--------------------|-----------------------------|-----|----|---|-------|--------------------------|---------|---------|-------|---|---------|--------|
| O86090 PPK_SALTY Polyphohate kinase | 15 |                    | GDTINYALLEIPSDK             | 163 | 15 | 3 | 18.08 | b3y3y5                   | 1648.81 | 56.687  | 1750  | 2 | 824.91  | -17.77 |
| O86090 PPK_SALTY Polyphohate kinase | 16 |                    | IIDSMIHAAHNGKK              | 381 | 14 | 3 | 24.66 | b13y11y12                | 1534.79 | 85.365  | 25831 | 2 | 767.90  | -13.68 |
| O86090 PPK_SALTY Polyphohate kinase | 17 |                    | TARLYTDYSLLTADAR            | 463 | 16 | 3 | 17.1  | b5b10y10                 | 1829.96 | 90.077  | 14979 | 2 | 915.48  | 9.67   |
| O86090 PPK_SALTY Polyphohate kinase | 18 |                    | LYTDYSLLTADARITNEVR         | 466 | 19 | 7 | 37.08 | b3b7b11°b11y4°y4y5       | 2214.17 | 73.292  | 9749  | 2 | 1107.59 | 12.24  |
| O86090 PPK_SALTY Polyphohate kinase | 19 |                    | IIISEEQGSNSHSRHLLGK         | 60  | 19 | 6 | 39.77 | b9b11b12b13y14°y14       | 2105.08 | 103.207 | 6810  | 3 | 702.37  | -13.22 |
| O86090 PPK_SALTY Polyphohate kinase | 20 |                    | DSRIIDSMIHAAHNGK            | 378 | 16 | 3 | 23.63 | b10b11y9                 | 1764.89 | 84.320  | 4237  | 2 | 882.95  | 5.26   |
| O86090 PPK_SALTY Polyphohate kinase | 21 |                    | LYIEKELSWLAFNER             | 5   | 15 | 5 | 46.8  | b10y4y5y7y8              | 1911.01 | 59.646  | 3285  | 3 | 637.67  | 3.26   |
| O86090 PPK_SALTY Polyphohate kinase | 22 |                    | ELSWLAFNERVLQEADK           | 10  | 18 | 8 | 38.27 | b5b7b11°b11*b11y4°y4y5   | 2119.10 | 114.499 | 2783  | 2 | 1060.05 | 6.22   |
| O86090 PPK_SALTY Polyphohate kinase | 23 |                    | YLEHDRVYIFENGSDK            | 588 | 16 | 3 | 17.1  | b4b11y12                 | 1954.92 | 80.388  | 2114  | 2 | 977.96  | -4.87  |
| O86090 PPK_SALTY Polyphohate kinase | 24 | Phosphoryl STY(11) | EIANAQQGLPSGITLK            | 520 | 16 | 9 | 52.99 | b3b6*b6b7*b7b10*b10b11y6 | 1719.84 | 57.334  | 4030  | 3 | 573.95  | -9.23  |
| O86090 PPK_SALTY Polyphohate kinase | 25 | Oxidation+M(18)    | VFNFIENPYRPVTFDYL MVSPQNSRR | 486 | 26 | 4 | 12.11 | b8y4*y4y18               | 3205.54 | 83.736  | 7799  | 4 | 802.14  | -13.71 |
