# Supplementary material for: Phenotypic profile linked to inhibition of the major Zn influx system in Salmonella enterica : proteomics and ionomics investigations
Source: Royal Society of Chemistry journal article supplement (doi:10.1039/c0mb00140f), 2010-10-20
Supplement: c0mb00140f.zip [file c0mb00140f.zip]

SA123 LC-MS run 1: 123\_220709\_1a2\_01

| Protein name                               | Peptide Rank | Peptide Modification | Peptide Sequence                    | Peptide sequence start | Peptide sequence Length | Peptide Matched Products | Peptide Score | By Matches                                                                                                                                                       | Precursor MH+ (Da) | Retention time (min) | Intensity | z | Precursor m/z | MH+ Error (ppm) |
|--------------------------------------------|--------------|----------------------|-------------------------------------|------------------------|-------------------------|--------------------------|---------------|------------------------------------------------------------------------------------------------------------------------------------------------------------------|--------------------|----------------------|-----------|---|---------------|-----------------|
| [P0A1S2]HNS_SALTY DNA-binding protein H-NS | 1            |                      | EMLIADGIDPNELLNSMAAAK               | 62                     | 21                      | 54                       | 289.3         | b2°b2b3°b3b4°b4b5°b5b6°b6b7°b7b8°b8b9°b9b12°b12b13°b13b18b21°b21y1y2y3y4y5y6°y6y7°y7°y7y8°y8y9y10y11°y11y12°y12°y12y13°y13°y13y13y14°y14y15°y15y16°y16y17°y17y21 | 2216.11            | 97.465               | 507100    | 2 | 1108.56       | 8.59            |
| [P0A1S2]HNS_SALTY DNA-binding protein H-NS | 2            |                      | YSYVDENGETK                         | 96                     | 11                      | 8                        | 47.42         | y2y7y8y9y10°y10°y10y11                                                                                                                                           | 1304.56            | 33.968               | 126086    | 2 | 652.78        | -5.33           |
| [P0A1S2]HNS_SALTY DNA-binding protein H-NS | 3            | Carbamidomethyl+C(2) | ECTLETLEEMLEK                       | 19                     | 13                      | 12                       | 57.97         | b2b7°b7y2°y2y4y5y9y10°y10y11y13                                                                                                                                  | 1624.76            | 93.452               | 50303     | 2 | 812.88        | 8.64            |
| [P0A1S2]HNS_SALTY DNA-binding protein H-NS | 4            |                      | EEESAAAAEVEER                       | 41                     | 13                      | 6                        | 26.11         | b2°b2y6y7y10y13                                                                                                                                                  | 1419.62            | 35.982               | 12925     | 2 | 710.31        | -2.24           |
| [P0A1S2]HNS_SALTY DNA-binding protein H-NS | 5            |                      | REEESAAAAEVEER                      | 40                     | 14                      | 5                        | 38.66         | b12y3y8y10y11                                                                                                                                                    | 1575.73            | 34.053               | 7479      | 2 | 788.37        | 2.09            |
| [P0A1S2]HNS_SALTY DNA-binding protein H-NS | 6            |                      | YSYVDENGETKTWTGQGR                  | 96                     | 18                      | 10                       | 84.09         | y3y5°y5y6°y6y13y14y15y16y17                                                                                                                                      | 2090.92            | 47.827               | 183567    | 3 | 697.65        | -8.06           |
| [P0A1S2]HNS_SALTY DNA-binding protein H-NS | 7            |                      | AARPAKYSYVDENGETK                   | 90                     | 17                      | 5                        | 30.53         | b3b11y5y6y13                                                                                                                                                     | 1898.91            | 107.257              | 5399      | 2 | 949.96        | -6.69           |
| [P0A1S2]HNS_SALTY DNA-binding protein H-NS | 8            | Oxidation+M(17)      | EMLIADGIDPNELLNSMAAAK               | 62                     | 21                      | 5                        | 19.51         | b16°b16y7y10y13                                                                                                                                                  | 2232.11            | 97.528               | 23665     | 2 | 1116.56       | 7.44            |
| [P64076]ENO_SALTY Enolase                  | 1            |                      | FNQIGSLTETLAAIK                     | 342                    | 15                      | 33                       | 215.64        | b2°b2b3°b3b4°b4b5°b5b6°b6°b6b12°b12b13°b13b14°b14y1y2y3y4y5y6y7y8y9y10y11y12y13°y13y15°y15                                                                       | 1605.88            | 86.426               | 379635    | 2 | 803.45        | -0.15           |
| [P64076]ENO_SALTY Enolase                  | 2            |                      | SGETEDATIADLAVGTAAGQIK              | 371                    | 22                      | 39                       | 297.33        | b2b3°b3b5b7b8°b8b9°b9b10b11b12°b12b14°b14b15b18°b18b22y2y3y4y5y6y7y8°y8y9°y9y10y11y12y13y14°y14y15y16y17y22                                                      | 2118.07            | 76.113               | 247688    | 2 | 1059.54       | 7.49            |
| [P64076]ENO_SALTY Enolase                  | 3            |                      | GMNTAVGDEGGYAPNLGSNAEALAVIAEAVK     | 200                    | 31                      | 29                       | 180.63        | b2b4°b4b5°b5b6°b6°b6b12b13b30y1y2y3y4y5y6y7y8y9y10y11y13y14y15y18y25°y25y31                                                                                      | 2989.47            | 95.671               | 193370    | 3 | 997.16        | 4.00            |
| [P64076]ENO_SALTY Enolase                  | 4            |                      | GIANSILIK                           | 333                    | 9                       | 7                        | 51.2          | b2y2y3y5y6y7y9                                                                                                                                                   | 928.57             | 61.421               | 189216    | 2 | 464.79        | -12.16          |
| [P64076]ENO_SALTY Enolase                  | 5            |                      | DAGYTAVISHR                         | 360                    | 11                      | 11                       | 76.09         | b2°b2b3b7y2y3y4y5y6y7y11                                                                                                                                         | 1189.59            | 42.345               | 149504    | 2 | 595.30        | -4.21           |
| [P64076]ENO_SALTY Enolase                  | 6            |                      | AVGAVNGPIAQAILGK                    | 66                     | 16                      | 6                        | 38.41         | b3b4y3y11y12y16                                                                                                                                                  | 1478.87            | 75.914               | 130339    | 2 | 739.94        | 2.31            |
| [P64076]ENO_SALTY Enolase                  | 7            |                      | YSMPVPMMNIIINGGEHADNNVDIQEFMIQPVGAK | 143                    | 34                      | 19                       | 50.52         | b1b2°b2b3°b3b5°b5b11y2y5y7y9y12°y12y13°y13y14y29y34                                                                                                              | 3759.78            | 99.080               | 114354    | 3 | 1253.93       | 5.32            |
| [P64076]ENO_SALTY Enolase                  | 8            |                      | YVLAGEGNK                           | 257                    | 9                       | 10                       | 75.81         | b2y3°y3y4y5y6°y6y7y8y9                                                                                                                                           | 950.49             | 34.278               | 93181     | 2 | 475.75        | 0.64            |
| [P64076]ENO_SALTY Enolase                  | 9            |                      | AVGAVNGPIAQAILGKDAK                 | 66                     | 19                      | 6                        | 23.5          | b1b2b3y5y6y14                                                                                                                                                    | 1793.01            | 69.590               | 81288     | 3 | 598.34        | -11.71          |
| [P64076]ENO_SALTY Enolase                  | 10           |                      | ILKEGIEK                            | 325                    | 8                       | 5                        | 38.4          | y1y2y3y4y5                                                                                                                                                       | 929.56             | 30.601               | 76302     | 2 | 465.28        | -12.28          |
| [P64076]ENO_SALTY Enolase                  | 11           |                      | IQLVGDDLFTNTNK                      | 311                    | 14                      | 19                       | 115.46        | b2°b2b3b4y2y4°y4y5y6°y6°y6y8y9y10°y10y11y12y14°y14                                                                                                               | 1562.85            | 78.341               | 64600     | 2 | 781.93        | 3.36            |
| [P64076]ENO_SALTY Enolase                  | 12           |                      | IEEALGEK                            | 411                    | 8                       | 6                        | 30.62         | b2b5y1y6y7y8                                                                                                                                                     | 888.45             | 32.175               | 34005     | 2 | 444.73        | -13.95          |

|                                              |    |                                         |                                                             |     |    |    |        |                                                                                 |         |         |        |   |         |        |
|----------------------------------------------|----|-----------------------------------------|-------------------------------------------------------------|-----|----|----|--------|---------------------------------------------------------------------------------|---------|---------|--------|---|---------|--------|
| P64076 ENO_SALTY Enolase                     | 13 |                                         | QYPIVSIEDGLDESDWDGFAYQTK                                    | 282 | 24 | 14 | 34.98  | b2*b2b3*b3b9b10b13y2y4*y4y6*y6y9y24                                             | 2776.28 | 94.323  | 27756  | 2 | 1388.64 | 6.42   |
| P64076 ENO_SALTY Enolase                     | 14 |                                         | AFTSEEFTHFLEELTK                                            | 266 | 16 | 3  | 15.43  | b4b11y11                                                                        | 1928.90 | 107.129 | 7341   | 3 | 643.64  | -12.91 |
| P64076 ENO_SALTY Enolase                     | 15 |                                         | EIIDSR                                                      | 10  | 6  | 2  | 25.1   | b4y3                                                                            | 732.39  | 29.266  | 19543  | 1 | 732.39  | -3.00  |
| P64076 ENO_SALTY Enolase                     | 16 |                                         | IMIDLDGTENK                                                 | 92  | 11 | 11 | 76.09  | b4b7y4°y4y5*y5y7°y7y8y9*y9                                                      | 1248.60 | 64.406  | 18854  | 2 | 624.80  | -11.44 |
| P64076 ENO_SALTY Enolase                     | 17 |                                         | GNPTVEAEVHLEGGFVGMAAAPS<br>GASTGSR                          | 16  | 30 | 5  | 12.81  | b3b11°b11y5y8                                                                   | 2856.38 | 92.720  | 15651  | 3 | 952.80  | 7.52   |
| P64076 ENO_SALTY Enolase                     | 18 |                                         | VLGDKIQLVGDDLFVTNTK                                         | 306 | 19 | 15 | 84.31  | b3b4b7y3°y3y4°y4y5y6°y6y8*y8y10y13*y13                                          | 2075.13 | 80.608  | 229247 | 3 | 692.38  | -5.53  |
| P64076 ENO_SALTY Enolase                     | 19 |                                         | GMPLYEHIAELNGTPGKYSMPVP<br>MMNIINGGEHADNNVDIQEFMIQP<br>VGAK | 126 | 51 | 7  | 26.6   | b4b5b14b20b22b26y4                                                              | 5567.61 | 98.857  | 112893 | 5 | 1114.33 | -8.77  |
| P64076 ENO_SALTY Enolase                     | 20 |                                         | GKGMNTAVGDEGGYAPNLGSNA<br>EALAVIAEAVK                       | 198 | 33 | 7  | 47.16  | b4b15y3y4y5y6y15                                                                | 3174.60 | 90.632  | 52612  | 3 | 1058.87 | 9.84   |
| P64076 ENO_SALTY Enolase                     | 21 |                                         | EIIDSRGNPTVEAEVHLEGGFVGM<br>AAPSGASTGSR                     | 10  | 36 | 3  | 11.01  | b4y6y27                                                                         | 3569.73 | 93.771  | 16249  | 4 | 893.19  | -0.14  |
| P64076 ENO_SALTY Enolase                     | 22 |                                         | IEEALGEKAPYNGR                                              | 411 | 14 | 4  | 38.91  | y4y5y6y9                                                                        | 1546.77 | 40.615  | 14371  | 3 | 516.26  | -12.31 |
| P64076 ENO_SALTY Enolase                     | 23 |                                         | EALELRDGDK                                                  | 46  | 10 | 10 | 80.83  | b4b7b8°b8y3y4°y4y6°y6y7                                                         | 1145.57 | 65.323  | 5545   | 2 | 573.29  | -6.39  |
| P64076 ENO_SALTY Enolase                     | 24 | Phohoryl.STY(14)                        | QYPIVSIEDGLDESDWDGFAYQTK                                    | 282 | 24 | 3  | 11.71  | b10b12y9                                                                        | 2856.23 | 110.138 | 2027   | 4 | 714.81  | 5.13   |
| P64076 ENO_SALTY Enolase                     | 25 | Oxidation+M(27)                         | YSMPVPMMNINGGEHADNNVDI<br>QEFMIPVGAK                        | 143 | 34 | 6  | 26.79  | b5b7b14y11*y11y12                                                               | 3775.79 | 108.732 | 3943   | 4 | 944.70  | 7.50   |
| P64076 ENO_SALTY Enolase                     | 26 | Oxidation+M(18)                         | GNPTVEAEVHLEGGFVGMAAAPS<br>GASTGSREALELR                    | 16  | 36 | 4  | 14.07  | b6y5y11y14                                                                      | 3583.75 | 99.907  | 3544   | 3 | 1195.25 | 1.16   |
| P64076 ENO_SALTY Enolase                     | 27 | Carbamidomethyl+C(8);<br>Oxidation+M(6) | DITLAMDCAASEFYKDGK                                          | 239 | 18 | 4  | 21.19  | y3y8y11°y11                                                                     | 2050.94 | 80.220  | 1617   | 4 | 513.49  | 13.09  |
| P64076 ENO_SALTY Enolase                     | 28 |                                         | GYTAVISHR                                                   | 362 | 9  | 4  | 17.59  | b3°b3b5°b5                                                                      | 1003.53 | 42.403  | 60965  | 2 | 502.27  | -1.89  |
| P64076 ENO_SALTY Enolase                     | 29 |                                         | LKEGIEK                                                     | 326 | 7  | 0  | 1.49   |                                                                                 | 816.47  | 30.596  | 42927  | 2 | 408.74  | -13.90 |
| P64076 ENO_SALTY Enolase                     | 30 |                                         | ANSILIK                                                     | 335 | 7  | 4  | 21.82  | b3°b3b4°b4                                                                      | 758.47  | 61.435  | 28050  | 1 | 758.47  | -3.22  |
| P64076 ENO_SALTY Enolase                     | 31 |                                         | AGYTAVISHR                                                  | 361 | 10 | 1  | 7.5    | b3                                                                              | 1074.56 | 42.357  | 7263   | 2 | 537.78  | -8.97  |
| P64076 ENO_SALTY Enolase                     | 32 |                                         | TAVISHR                                                     | 364 | 7  | 1  | 7.5    | b3                                                                              | 783.44  | 42.335  | 6556   | 2 | 392.22  | -7.17  |
| P64076 ENO_SALTY Enolase                     | 33 |                                         | LAGEGNK                                                     | 259 | 7  | 2  | 21.82  | b3b5                                                                            | 688.36  | 34.339  | 5920   | 1 | 688.36  | -3.64  |
| P64076 ENO_SALTY Enolase                     | 34 |                                         | YSMPVPMMNINGGEHA                                            | 143 | 17 | 1  | 12.08  | y8                                                                              | 1860.85 | 99.085  | 2845   | 3 | 620.96  | 3.67   |
| P64076 ENO_SALTY Enolase                     | 35 |                                         | DAGYTAVISHR                                                 | 360 | 11 | 0  | 2.98   |                                                                                 | 1171.58 | 42.346  | 3874   | 3 | 391.20  | -0.10  |
| P0A2A3 RL1_SALTY 50S ribosomal<br>protein L1 | 1  |                                         | VVGQLGQVLGPR                                                | 122 | 12 | 17 | 113.5  | b2b4b5°b5b7°b7y2y3y4y6y7*y7y8y9y10*y10y12                                       | 1222.72 | 59.968  | 209659 | 2 | 611.86  | -6.09  |
| P0A2A3 RL1_SALTY 50S ribosomal<br>protein L1 | 2  |                                         | VAVFTQGPNAEAAK                                              | 74  | 14 | 29 | 225.93 | b2b3b4b5b6b9b10b11*b11b12°b12b13y2y3y4°y4y5y7y8°y8y9*y9y10*y10y11°y11*y11y12y14 | 1402.73 | 46.212  | 172164 | 2 | 701.87  | -0.52  |
| P0A2A3 RL1_SALTY 50S ribosomal<br>protein L1 | 3  |                                         | VGTVTPNVAEAVK                                               | 141 | 13 | 26 | 161.45 | b1b2b3°b3b5°b5b11°b11b12*b12b13y3y4y5y6y7y8y9*y9y10y11°y11y12°y12*y12y13        | 1284.72 | 48.961  | 171979 | 2 | 642.86  | 0.67   |
| P0A2A3 RL1_SALTY 50S ribosomal<br>protein L1 | 4  |                                         | QYDINEAIALLK                                                | 19  | 12 | 7  | 50.52  | b8b12y3y4y5y6y12                                                                | 1390.76 | 86.001  | 63681  | 2 | 695.88  | -1.23  |
| P0A2A3 RL1_SALTY 50S ribosomal<br>protein L1 | 5  |                                         | GEMNFDVVIADAMR                                              | 106 | 16 | 4  | 21.96  | b10b11y3y16                                                                     | 1751.83 | 63.288  | 42028  | 3 | 584.62  | 12.96  |
| P0A2A3 RL1_SALTY 50S ribosomal<br>protein L1 | 6  |                                         | AAGAELVGMEDLADQIK                                           | 88  | 17 | 9  | 65.65  | b3b4b5b6°b6b7y4y11y17                                                           | 1730.87 | 80.591  | 41032  | 2 | 865.94  | 5.64   |
| P0A2A3 RL1_SALTY 50S ribosomal<br>protein L1 | 7  |                                         | GATVLPHTGR                                                  | 60  | 11 | 15 | 106.72 | b3°b3b4°b4y2y3y4°y4y5y6°y6y7y8y9y11                                             | 1065.57 | 30.765  | 36950  | 2 | 533.29  | -6.76  |
| P0A2A3 RL1_SALTY 50S ribosomal<br>protein L1 | 8  |                                         | AAGAELVGMEDLADQIKK                                          | 88  | 18 | 6  | 40.3   | b2b3b4b7b8y10                                                                   | 1858.94 | 73.945  | 31268  | 3 | 620.32  | -8.86  |

|                                                            |    |                      |                              |     |    |    |        |                                                               |         |         |       |   |         |        |
|------------------------------------------------------------|----|----------------------|------------------------------|-----|----|----|--------|---------------------------------------------------------------|---------|---------|-------|---|---------|--------|
| [P0A2A3]RL1_SALTY 50S ribosomal protein L1                 | 9  |                      | ELATAK                       | 31  | 6  | 1  | 12.8   | b4                                                            | 632.35  | 29.271  | 11460 | 1 | 632.35  | -13.71 |
| [P0A2A3]RL1_SALTY 50S ribosomal protein L1                 | 10 |                      | SDQNVR                       | 54  | 6  | 1  | 12.8   | b5                                                            | 718.34  | 87.589  | 5617  | 1 | 718.34  | -8.67  |
| [P0A2A3]RL1_SALTY 50S ribosomal protein L1                 | 11 |                      | VDATKQYDINEAIALLK            | 14  | 17 | 4  | 24.84  | b8b13b14y4                                                    | 1905.02 | 80.923  | 21312 | 3 | 635.68  | -7.37  |
| [P0A2A3]RL1_SALTY 50S ribosomal protein L1                 | 12 |                      | GLMPNPKVGTVTPNVAEAVK         | 134 | 20 | 5  | 20.34  | b3b6*b6b19y5                                                  | 2022.10 | 63.645  | 2838  | 3 | 674.71  | -1.69  |
| [P0A2A3]RL1_SALTY 50S ribosomal protein L1                 | 13 | Phohoryl STY(5)      | VAVFTQGPNAEAAK               | 74  | 14 | 3  | 17.37  | b3b11y9                                                       | 1482.69 | 50.481  | 1644  | 2 | 741.85  | 1.98   |
| [P0A2A3]RL1_SALTY 50S ribosomal protein L1                 | 14 | Oxidation+M(9)       | AAGAELVGMEDLADQIKK           | 88  | 18 | 3  | 14.03  | b3b5y12                                                       | 1874.95 | 59.783  | 4788  | 2 | 937.98  | -0.85  |
| [P0A2A3]RL1_SALTY 50S ribosomal protein L1                 | 15 | Oxidation+M(9)       | AAGAELVGMEDLADQIK            | 88  | 17 | 7  | 48.99  | b4b13b15y8*y8y9y10                                            | 1746.87 | 84.699  | 3203  | 2 | 873.94  | 8.53   |
| [P0A2A3]RL1_SALTY 50S ribosomal protein L1                 | 16 |                      | TVLPHGTGR                    | 62  | 9  | 0  | 2.98   |                                                               | 937.51  | 30.762  | 30653 | 2 | 469.26  | -11.59 |
| [P0A2H9]DSBA_SALTY Thioldisulfide interchange protein dsbA | 1  |                      | AAADLQLQGVPMFVNGK            | 158 | 18 | 20 | 159.3  | b2b4b5b6*b6b9b10b12b15y2y3y4y5y7y8y9y10y12y13y18              | 1829.97 | 81.544  | 82835 | 2 | 915.49  | 5.34   |
| [P0A2H9]DSBA_SALTY Thioldisulfide interchange protein dsbA | 2  |                      | TQTVQSAADIR                  | 116 | 11 | 7  | 22.11  | b3°b3*b3y2y7y9y11                                             | 1189.61 | 36.296  | 24889 | 2 | 595.31  | -3.80  |
| [P0A2H9]DSBA_SALTY Thioldisulfide interchange protein dsbA | 3  |                      | YQINPQGMdTSSMDVFVQQYADTVK    | 176 | 25 | 18 | 76.65  | b1b2*b2b4b5b7b13y1y5y6y7°y7*y7y8°y8y9y12y25                   | 2865.32 | 87.248  | 23487 | 2 | 1433.16 | 5.28   |
| [P0A2H9]DSBA_SALTY Thioldisulfide interchange protein dsbA | 4  |                      | YHVEFLGPLGK                  | 77  | 11 | 7  | 47.42  | b1b2b3b4b7b8y2                                                | 1259.67 | 71.975  | 5785  | 2 | 630.34  | -4.46  |
| [P0A2H9]DSBA_SALTY Thioldisulfide interchange protein dsbA | 5  |                      | ELTQAWAVAMALGVEDK            | 88  | 17 | 8  | 66.77  | b5b9y4y5y6y7y13y15                                            | 1831.93 | 61.383  | 6906  | 2 | 916.47  | 3.27   |
| [P0A2H9]DSBA_SALTY Thioldisulfide interchange protein dsbA | 6  |                      | TQTVQSAADIRK                 | 116 | 12 | 3  | 20.17  | b5b11y4                                                       | 1317.71 | 67.060  | 2922  | 2 | 659.36  | -4.26  |
| [P0A2H9]DSBA_SALTY Thioldisulfide interchange protein dsbA | 7  |                      | GEDYDAAWNSFVVKSLVAQQEK       | 136 | 22 | 6  | 22.13  | b3y3y4°y4*y4y8                                                | 2484.18 | 136.418 | 2646  | 2 | 1242.59 | -8.94  |
| [P0A2H9]DSBA_SALTY Thioldisulfide interchange protein dsbA | 8  | Oxidation+M(21)      | YHVEFLGPLGKELTQAWAVAMALGVEDK | 77  | 28 | 3  | 11.08  | b8b11y9                                                       | 3088.57 | 79.296  | 8171  | 4 | 772.90  | -4.35  |
| [P02910]HISJ_SALTY Histidine-binding periplasmic protein   | 1  |                      | VGVLQGTTQETFGNEHWAPK         | 135 | 20 | 22 | 97.65  | b1b2b3b12b13b15*b15y1y2y4y7°y7y8y9y10*y10y12*y12y13°y13y17y20 | 2199.08 | 64.403  | 75756 | 3 | 733.70  | -1.22  |
| [P02910]HISJ_SALTY Histidine-binding periplasmic protein   | 2  |                      | IGTDPTYAPFESK                | 29  | 13 | 18 | 153.13 | b4b5°b5b7b11°b11b12°b12y5y6y7°y7y8y9y10y11y12y13              | 1425.69 | 56.183  | 63006 | 2 | 713.35  | 1.63   |
| [P02910]HISJ_SALTY Histidine-binding periplasmic protein   | 3  |                      | NSDIQPTVASLK                 | 120 | 12 | 14 | 91.11  | b1b2°b2b3°b3b4y3y4y7y8*y8y9y10y12                             | 1272.68 | 49.034  | 50776 | 2 | 636.84  | -2.01  |
| [P02910]HISJ_SALTY Histidine-binding periplasmic protein   | 4  | Carbamidomethyl+C(5) | INTQCTFVENPLDALIPSLK         | 62  | 20 | 19 | 89.57  | b2*b2b3°b3b4°b4*b4b8°b8*b8b9y1y2y3y4y5y6y7y20                 | 2273.20 | 104.484 | 41179 | 2 | 1137.10 | 4.94   |
| [P02910]HISJ_SALTY Histidine-binding periplasmic protein   | 5  |                      | FGGPAVKDEK                   | 201 | 10 | 7  | 24.62  | b6y2°y2y4°y4y6y10                                             | 1047.54 | 27.724  | 16583 | 2 | 524.27  | -5.13  |
| [P02910]HISJ_SALTY Histidine-binding periplasmic protein   | 6  |                      | NAQGELVGFIDIDLAK             | 42  | 15 | 5  | 33.44  | b8b9b14y6y8                                                   | 1589.83 | 80.422  | 10156 | 2 | 795.42  | 10.29  |
| [P02910]HISJ_SALTY Histidine-binding periplasmic protein   | 7  |                      | LFGVGTGMGLR                  | 211 | 11 | 3  | 22.11  | b10y3y7                                                       | 1107.59 | 73.349  | 8976  | 2 | 554.30  | -8.71  |

|                                                         |    |                      |                               |     |    |    |        |                                                                                                       |         |         |        |   |         |        |
|---------------------------------------------------------|----|----------------------|-------------------------------|-----|----|----|--------|-------------------------------------------------------------------------------------------------------|---------|---------|--------|---|---------|--------|
| P02910 HISJ_SALTY Histidine-binding periplasmic protein | 8  |                      | GIEIVSYQGQDNIYSDLTAGR         | 155 | 21 | 7  | 19.51  | b7°b7b9°b9b11°b11y11                                                                                  | 2299.14 | 80.403  | 1657   | 2 | 1150.07 | 6.48   |
| P02910 HISJ_SALTY Histidine-binding periplasmic protein | 9  | Carbamidomethyl+C(5) | INTQCTFVENPLDALIPSLKAK        | 62  | 22 | 3  | 12.26  | b4b15y20                                                                                              | 2472.32 | 99.361  | 185883 | 3 | 824.78  | 1.38   |
| P02910 HISJ_SALTY Histidine-binding periplasmic protein | 10 |                      | IGTDPTYAPFESKNAQGELVGFDI DLAK | 29  | 28 | 4  | 23.78  | y4y11y15y17                                                                                           | 2996.52 | 96.577  | 23629  | 3 | 999.51  | 10.35  |
| P02910 HISJ_SALTY Histidine-binding periplasmic protein | 11 |                      | NSDIQPTVASLKGK                | 120 | 14 | 4  | 25.94  | b4°b4b6b9                                                                                             | 1457.79 | 43.242  | 10849  | 3 | 486.60  | -6.62  |
| P02910 HISJ_SALTY Histidine-binding periplasmic protein | 12 |                      | IDAAFQDEVAASEGFLKQPVGK        | 176 | 22 | 7  | 27.27  | b6b10°b10b12°b12b13°b13                                                                               | 2320.17 | 64.396  | 4520   | 3 | 774.06  | -5.58  |
| P02910 HISJ_SALTY Histidine-binding periplasmic protein | 13 |                      | EALNKAFAEMR                   | 229 | 11 | 8  | 47.42  | y3°y3y4°y4y5°y5y6°y6                                                                                  | 1279.63 | 64.411  | 4488   | 2 | 640.32  | -12.69 |
| P02910 HISJ_SALTY Histidine-binding periplasmic protein | 14 |                      | AFAEMRADGTYEK                 | 234 | 13 | 3  | 18.63  | b6y8y11                                                                                               | 1488.68 | 136.458 | 3803   | 1 | 1488.68 | -0.82  |
| P02910 HISJ_SALTY Histidine-binding periplasmic protein | 15 |                      | EDNELREALNK                   | 223 | 11 | 6  | 25.12  | b9°b9b10°b10y10*y10                                                                                   | 1330.65 | 136.392 | 1958   | 1 | 1330.65 | -8.53  |
| P02910 HISJ_SALTY Histidine-binding periplasmic protein | 16 | Phohoryl STY(6)      | LFGVGTGMGLRK                  | 211 | 12 | 3  | 20.17  | b4y8y10                                                                                               | 1315.67 | 63.646  | 7528   | 2 | 658.34  | 12.53  |
| P02910 HISJ_SALTY Histidine-binding periplasmic protein | 17 | Oxidation+M(8)       | LFGVGTGMGLR                   | 211 | 11 | 3  | 22.11  | b4b8y3                                                                                                | 1123.58 | 31.645  | 4623   | 3 | 375.20  | -7.93  |
| P02910 HISJ_SALTY Histidine-binding periplasmic protein | 18 |                      | GGPAVKDEK                     | 202 | 9  | 2  | 19.31  | b3b8                                                                                                  | 900.47  | 27.699  | 5187   | 2 | 450.74  | -4.27  |
| P02910 HISJ_SALTY Histidine-binding periplasmic protein | 19 |                      | VGVLQGTQTQE                   | 135 | 10 | 3  | 20.59  | y3y4°y4                                                                                               | 1031.54 | 64.383  | 2748   | 2 | 516.28  | 6.39   |
| P02910 HISJ_SALTY Histidine-binding periplasmic protein | 20 |                      | FGNEHWAPK                     | 146 | 9  | 0  | 7.45   |                                                                                                       | 1085.53 | 64.433  | 2407   | 2 | 543.27  | 11.25  |
| Q8ZK80 RL9_SALTY 50S ribosomal protein L9               | 1  |                      | LADVLAAANAR                   | 57  | 11 | 18 | 119.03 | b2b3b4°b4y1y3*y3y4*y4y5y6*y6y7*y7y8y9y10y11                                                           | 1084.60 | 54.228  | 235822 | 2 | 542.80  | -8.10  |
| Q8ZK80 RL9_SALTY 50S ribosomal protein L9               | 2  |                      | VANLGSLGDQVNVK                | 8   | 14 | 21 | 163.71 | b2b3b4b11°b11b12°b12*b12b13y3y4y6y7*y7y8y9y10°y10y11y12y14                                            | 1413.77 | 57.487  | 122653 | 2 | 707.39  | -3.19  |
| Q8ZK80 RL9_SALTY 50S ribosomal protein L9               | 3  |                      | NVEYFEAR                      | 42  | 8  | 7  | 50.7   | y2y3y4y5y6y8*y8                                                                                       | 1027.47 | 47.753  | 117905 | 2 | 514.24  | -9.86  |
| Q8ZK80 RL9_SALTY 50S ribosomal protein L9               | 4  |                      | DIADAVTAAGVDVAK               | 97  | 15 | 11 | 121.06 | b3b4b5b6y4y6y7y9y10y11y13                                                                             | 1415.74 | 67.097  | 116784 | 2 | 708.37  | -1.55  |
| Q8ZK80 RL9_SALTY 50S ribosomal protein L9               | 5  |                      | VIINVVAE                      | 141 | 8  | 7  | 38.4   | b1b5°b5b6b7y1y8                                                                                       | 856.51  | 64.407  | 88800  | 1 | 856.51  | -5.42  |
| Q8ZK80 RL9_SALTY 50S ribosomal protein L9               | 6  |                      | INALETVTIASK                  | 71  | 12 | 6  | 24.15  | b2°b2b3y10y11y12                                                                                      | 1259.72 | 61.919  | 64965  | 2 | 630.36  | -0.19  |
| Q8ZK80 RL9_SALTY 50S ribosomal protein L9               | 7  |                      | NVEYFEARR                     | 42  | 9  | 4  | 35.89  | b9y6y7y8                                                                                              | 1183.59 | 67.194  | 3517   | 2 | 592.30  | 4.43   |
| Q8ZK80 RL9_SALTY 50S ribosomal protein L9               | 8  |                      | MQVILLDK                      | 0   | 8  | 3  | 38.4   | y3y4y5                                                                                                | 959.55  | 65.136  | 123640 | 2 | 480.28  | -11.00 |
| Q8ZK80 RL9_SALTY 50S ribosomal protein L9               | 9  |                      | NFLVPK                        | 27  | 6  | 2  | 25.1   | y3y4                                                                                                  | 717.43  | 52.000  | 42550  | 1 | 717.43  | -3.57  |
| Q8ZK80 RL9_SALTY 50S ribosomal protein L9               | 10 |                      | TTGEHEVNFQVHSEVFAK            | 123 | 18 | 5  | 22.36  | b5y3y6y11°y11                                                                                         | 2059.03 | 65.998  | 3250   | 3 | 687.01  | 19.80  |
| Q8ZK80 RL9_SALTY 50S ribosomal protein L9               | 11 |                      | NVEYFEARR                     | 42  | 9  | 6  | 42.17  | b5y3y7°y7y8°y8                                                                                        | 1183.58 | 64.434  | 5294   | 2 | 592.29  | -5.47  |
| Q8ZK80 RL9_SALTY 50S ribosomal protein L9               | 12 |                      | AELEAKLADVLAAANAR             | 51  | 17 | 6  | 14.67  | b3°b3b5°b5y4*y4                                                                                       | 1725.96 | 123.528 | 2819   | 2 | 863.48  | 6.72   |
| P0A1D5 CH10_SALTY 10 kDa chaperonin                     | 1  |                      | ILDNGTVQPLDVK                 | 47  | 13 | 37 | 213.13 | b2b3b4°b4*b4b5°b5b6°b6°b6b7°b7°b7b8°b8b10b11°b11°b11b13y1y2y3y5y6°y6°y6y7y8y9y10y11°y11°y11y12y13*y13 | 1411.77 | 58.235  | 348925 | 2 | 706.39  | -3.89  |

|                                                            |   |               |                                  |     |    |    |        |                                                                                                                            |         |         |        |   |         |        |
|------------------------------------------------------------|---|---------------|----------------------------------|-----|----|----|--------|----------------------------------------------------------------------------------------------------------------------------|---------|---------|--------|---|---------|--------|
| P0A1D5 CH10_SALTY 10 kDa chaperonin                        | 2 |               | VGDIVIFNDGYGVK                   | 60  | 14 | 18 | 161.95 | b3b4b5°b5b9b13y1y3y4y5y6y8y9y10y11y12*y12y14                                                                               | 1495.78 | 74.326  | 314352 | 2 | 748.39  | 2.12   |
| P0A1D5 CH10_SALTY 10 kDa chaperonin                        | 3 |               | SAGGIVLTGSAAGK                   | 20  | 14 | 18 | 129.56 | b3°b3b4b5°b5b10b13°b13y1y2y3y4y6y7y8y9y12y14                                                                               | 1188.65 | 44.623  | 162951 | 2 | 594.83  | -5.75  |
| P0A1D5 CH10_SALTY 10 kDa chaperonin                        | 4 |               | GEIIAVGK                         | 37  | 8  | 5  | 58.24  | b5y3y4y5y6                                                                                                                 | 786.46  | 42.535  | 36180  | 2 | 393.73  | -15.37 |
| P0A1D5 CH10_SALTY 10 kDa chaperonin                        | 5 |               | IDNEEVLIMSESILAIVEA              | 77  | 20 | 3  | 19.8   | b5b8b11                                                                                                                    | 2203.09 | 74.615  | 1732   | 4 | 551.53  | -4.77  |
| P0A1D5 CH10_SALTY 10 kDa chaperonin                        | 6 |               | VGDIVIFNDGYGVKSEK                | 60  | 17 | 4  | 14.67  | b14°b14y3y8                                                                                                                | 1839.96 | 100.283 | 36136  | 2 | 920.48  | 3.65   |
| P0A1D5 CH10_SALTY 10 kDa chaperonin                        | 7 |               | ILDNGTVQPLDVKVGDIVIFNDGYGVK      | 47  | 27 | 6  | 23.61  | b5b8b12y3y6y14                                                                                                             | 2888.53 | 91.576  | 15877  | 3 | 963.52  | -2.45  |
| P0A1D5 CH10_SALTY 10 kDa chaperonin                        | 8 |               | SEKIDNEEVLIMSESILAIVEA           | 74  | 23 | 7  | 34.18  | b3b7b9b10*b10b12y3                                                                                                         | 2547.30 | 136.382 | 2962   | 2 | 1274.15 | 8.82   |
| P0A299 RL7_SALTY 50S ribosomal protein L7/L12              | 1 |               | EAKDLVESAPAALKEGVSK              | 82  | 19 | 7  | 22.66  | b5b7°b7b8°b8y1y19                                                                                                          | 1942.05 | 55.787  | 61863  | 3 | 648.02  | -0.19  |
| P0A299 RL7_SALTY 50S ribosomal protein L7/L12              | 2 |               | DQIIIEAVSAMSVM DVVVELISAMEEK     | 5   | 25 | 23 | 136.98 | b2°b2*b2b3°b3b4b5b6°b6b7b8°b8b10y2°y2y3y4y5y6°y6y7y9y10                                                                    | 2737.34 | 137.117 | 47509  | 3 | 913.12  | 2.32   |
| P0A299 RL7_SALTY 50S ribosomal protein L7/L12              | 3 |               | SLEEAGAEVEVK                     | 109 | 12 | 5  | 31.23  | b5b12y3y8y9                                                                                                                | 1260.63 | 58.008  | 5668   | 2 | 630.82  | -1.26  |
| P0A299 RL7_SALTY 50S ribosomal protein L7/L12              | 4 |               | MSITKDQIIIEAVSAMSVM DVVELISAMEEK | 0   | 30 | 4  | 10.94  | b6y7y13y30                                                                                                                 | 3297.60 | 110.575 | 1824   | 3 | 1099.87 | -9.18  |
| P0A299 RL7_SALTY 50S ribosomal protein L7/L12              | 5 |               | DLVESAPAALK                      | 85  | 11 | 4  | 22.11  | b4°b4b6y4                                                                                                                  | 1113.61 | 55.313  | 5362   | 2 | 557.31  | -3.29  |
| P0A299 RL7_SALTY 50S ribosomal protein L7/L12              | 6 |               | AAGANK                           | 60  | 6  | 1  | 12.8   | y5                                                                                                                         | 531.29  | 31.571  | 3863   | 1 | 531.29  | 2.41   |
| P0A299 RL7_SALTY 50S ribosomal protein L7/L12              | 7 |               | SITKDQIIIEAVSAMSVM DVVELISAMEEK  | 1   | 29 | 3  | 11     | b6y11y15                                                                                                                   | 3166.64 | 136.618 | 4281   | 3 | 1056.22 | 14.19  |
| P0A299 RL7_SALTY 50S ribosomal protein L7/L12              | 8 | Oxidation+M() | SITKDQIIIEAVSAMSVM DVVELISAMEEK  | 1   | 29 | 4  | 20.68  | b10y3y6y7                                                                                                                  | 3182.58 | 102.116 | 30886  | 3 | 1061.53 | -1.30  |
| P0A1P0 G3P1_SALTY Glyceraldehyde-3-phosphate dehydrogenase | 1 |               | VINDNFGII EGLMTTVHATTATQK        | 160 | 24 | 44 | 273.17 | b2b3b4°b4°b4b5°b5°b5b6°b6°b6b7°b7°b7b8°b8y1y3y4y5y6y7°y7°y7y8°y8°y8y9y10y11y14*y14y15°y15y16y18°y18y19y20y21y22°y22y24*y24 | 2574.32 | 98.605  | 641275 | 3 | 858.78  | -1.61  |
| P0A1P0 G3P1_SALTY Glyceraldehyde-3-phosphate dehydrogenase | 2 |               | AGIALNDNFVK                      | 296 | 11 | 16 | 118.23 | b3b4b5b10y1y2y3y4y5°y5y6°y6y7°y7y8y11                                                                                      | 1161.62 | 62.250  | 347104 | 2 | 581.31  | -6.83  |
| P0A1P0 G3P1_SALTY Glyceraldehyde-3-phosphate dehydrogenase | 3 |               | LVSWYDNETGYSNK                   | 307 | 14 | 24 | 165.93 | b3°b3b6b7°b7°b7b8b9b11y2y3y4°y4°y4y5°y5y6°y6y9y10°y10y11y12y14                                                             | 1675.77 | 59.067  | 257066 | 2 | 838.39  | 6.99   |
| P0A1P0 G3P1_SALTY Glyceraldehyde-3-phosphate dehydrogenase | 4 |               | GASQNIIPSSTGAAK                  | 198 | 15 | 26 | 188.81 | b3°b3b5°b5°b5b6°b6b7°b7°b7b11b14y2y3y4y5y6y7y8°y8y9y10y11y13°y13y15                                                        | 1401.73 | 41.800  | 230953 | 2 | 701.37  | -3.31  |
| P0A1P0 G3P1_SALTY Glyceraldehyde-3-phosphate dehydrogenase | 5 |               | VLDLIAHISK                       | 321 | 10 | 10 | 69.31  | b3°b3y1y2°y2y3y4y5y6y8                                                                                                     | 1108.66 | 66.177  | 202630 | 2 | 554.84  | -6.94  |
| P0A1P0 G3P1_SALTY Glyceraldehyde-3-phosphate dehydrogenase | 6 |               | SDIEIVAINDLLDAEY MAYMLK          | 24  | 22 | 18 | 94.92  | b2b3°b3b4°b4b5b6°b6b8b10y4y6y9y10y11y14*y14y22                                                                             | 2530.24 | 126.798 | 174338 | 3 | 844.08  | -3.28  |

|                                                          |    |                                                      |                                      |     |    |    |        |                                                                                                                                       |         |         |        |   |         |        |
|----------------------------------------------------------|----|------------------------------------------------------|--------------------------------------|-----|----|----|--------|---------------------------------------------------------------------------------------------------------------------------------------|---------|---------|--------|---|---------|--------|
| P0A1P0 G3P1_SALTY Glyceraldehyde-3-phohate dehydrogenase | 7  |                                                      | VPTPNVSVVDLTVR                       | 232 | 14 | 15 | 110.02 | b2b3b5*b5y2y3y4y5y6y8y10y11y12°y12y14                                                                                                 | 1495.85 | 71.856  | 88129  | 2 | 748.43  | -1.80  |
| P0A1P0 G3P1_SALTY Glyceraldehyde-3-phohate dehydrogenase | 8  |                                                      | TVDGPSHKDWR                          | 184 | 11 | 4  | 29.1   | y3y6y7y11                                                                                                                             | 1297.62 | 29.537  | 8166   | 2 | 649.32  | -4.33  |
| P0A1P0 G3P1_SALTY Glyceraldehyde-3-phohate dehydrogenase | 9  |                                                      | AATYEQIK                             | 249 | 8  | 6  | 30.62  | b3y5*y5y6°y6*y6                                                                                                                       | 923.47  | 32.013  | 219877 | 2 | 462.24  | -17.71 |
| P0A1P0 G3P1_SALTY Glyceraldehyde-3-phohate dehydrogenase | 10 |                                                      | VLPELNGK                             | 217 | 8  | 10 | 63.01  | y3*y3y4*y4y5°y5*y5y6°y6y7                                                                                                             | 869.50  | 45.704  | 68652  | 2 | 435.25  | -15.09 |
| P0A1P0 G3P1_SALTY Glyceraldehyde-3-phohate dehydrogenase | 11 |                                                      | VGINGFGR                             | 4   | 8  | 3  | 30.62  | b3y4y5                                                                                                                                | 819.46  | 65.306  | 3092   | 2 | 410.24  | 19.37  |
| P0A1P0 G3P1_SALTY Glyceraldehyde-3-phohate dehydrogenase | 12 | Carbamidomethyl+C(12)<br>;Carbamidomethyl+C(16)<br>) | YEQQDIVSNASCTTNCLAPLAK               | 138 | 22 | 4  | 27.65  | y3y10y13y15                                                                                                                           | 2412.15 | 72.650  | 1801   | 3 | 804.72  | 11.64  |
| P0A1P0 G3P1_SALTY Glyceraldehyde-3-phohate dehydrogenase | 13 | Carbamidomethyl+C(18)<br>;Carbamidomethyl+C(22)<br>) | GANFDKYEQQDIVSNASCTTNCLAPLAK         | 132 | 28 | 44 | 322.58 | b3b4b5*b5b6b8*b8b10*b10b11°b11*b11b12°b12b13°b13b15b16b18b22b23b24*b24b26b27y3y4y5y6y8y9y10y11°y11*y11y12*y12y13°y13y14y15°y15*y15y21 | 3044.41 | 67.593  | 498941 | 3 | 1015.48 | 0.72   |
| P0A1P0 G3P1_SALTY Glyceraldehyde-3-phohate dehydrogenase | 14 |                                                      | VLPELNGKLTGMAFR                      | 217 | 15 | 3  | 24.39  | y6y9y13                                                                                                                               | 1645.89 | 73.890  | 19509  | 3 | 549.30  | -12.31 |
| P0A1P0 G3P1_SALTY Glyceraldehyde-3-phohate dehydrogenase | 15 |                                                      | KHITAGAK                             | 107 | 8  | 6  | 63.01  | y3y4y5°y5y6y7                                                                                                                         | 825.49  | 12.556  | 11351  | 2 | 413.25  | -10.94 |
| P0A1P0 G3P1_SALTY Glyceraldehyde-3-phohate dehydrogenase | 16 |                                                      | GGRGASQNIPSSTGAAK                    | 195 | 18 | 6  | 36.77  | b8b9y3y7y8°y8                                                                                                                         | 1671.88 | 37.687  | 8394   | 2 | 836.44  | 1.46   |
| P0A1P0 G3P1_SALTY Glyceraldehyde-3-phohate dehydrogenase | 17 |                                                      | VINDNFGIIEGLMTTVHATTATQK<br>TVDGPSHK | 160 | 32 | 4  | 14.69  | b10y3y12y17                                                                                                                           | 3395.73 | 79.676  | 7889   | 4 | 849.69  | 0.00   |
| P0A1P0 G3P1_SALTY Glyceraldehyde-3-phohate dehydrogenase | 18 |                                                      | DNTPMFVKGANFDK                       | 124 | 14 | 3  | 17.37  | b11b13y10                                                                                                                             | 1583.77 | 70.968  | 5428   | 2 | 792.39  | 12.72  |
| P0A1P0 G3P1_SALTY Glyceraldehyde-3-phohate dehydrogenase | 19 |                                                      | AGIALNDNFVKLSWYDNETGYS<br>NK         | 296 | 25 | 4  | 26.05  | b4b5b7b16                                                                                                                             | 2818.39 | 136.432 | 3985   | 2 | 1409.70 | 7.71   |
| P0A1P0 G3P1_SALTY Glyceraldehyde-3-phohate dehydrogenase | 20 | Phohoryl STY(4)                                      | VVLTGPSK                             | 116 | 8  | 5  | 45.93  | b4b5b6°b6y4                                                                                                                           | 880.45  | 114.791 | 2047   | 1 | 880.45  | 2.43   |
| P0A1P0 G3P1_SALTY Glyceraldehyde-3-phohate dehydrogenase | 21 | Oxidation+M(13)                                      | VINDNFGIIEGLMTTVHATTATQK             | 160 | 24 | 8  | 34.05  | b4b5*b5y11*y11y12°y12y14                                                                                                              | 2590.30 | 67.288  | 3540   | 4 | 648.33  | -5.75  |
| P0A1P0 G3P1_SALTY Glyceraldehyde-3-phohate dehydrogenase | 22 |                                                      | DLIAHISK                             | 323 | 8  | 3  | 19.31  | b3°b3b5                                                                                                                               | 896.51  | 66.161  | 66062  | 2 | 448.76  | -11.51 |
| P0A1P0 G3P1_SALTY Glyceraldehyde-3-phohate dehydrogenase | 23 |                                                      | LDLIAHISK                            | 322 | 9  | 2  | 7.8    | b3°b3                                                                                                                                 | 1009.60 | 66.186  | 57730  | 2 | 505.30  | -5.68  |
| P0A1P0 G3P1_SALTY Glyceraldehyde-3-phohate dehydrogenase | 24 |                                                      | LNDNFVK                              | 300 | 7  | 2  | 17.59  | b3b5                                                                                                                                  | 849.45  | 62.194  | 21547  | 1 | 849.45  | -1.58  |

|                                                     |    |                |                             |     |    |    |        |                                                                                 |         |         |        |   |        |        |
|-----------------------------------------------------|----|----------------|-----------------------------|-----|----|----|--------|---------------------------------------------------------------------------------|---------|---------|--------|---|--------|--------|
| P0A7W4 RS5_SALTY 30S ribosomal protein S5           | 1  |                | AVLEVAGVHNVLAK              | 112 | 14 | 16 | 132.57 | b2b3b4°b4b5b11b13y2y3y6y8y9y10y11y12y14                                         | 1419.83 | 61.394  | 373563 | 2 | 710.42 | -0.17  |
| P0A7W4 RS5_SALTY 30S ribosomal protein S5           | 2  |                | VFMQPASEGTGHIAGGAMR         | 93  | 19 | 29 | 259.85 | b2b3b4b6b7b10b11°b11b12b13b14°b14y1y3y4y5y6y7y9y10y11y12y13y15°y15y16*y16y17y19 | 1892.94 | 68.994  | 257205 | 2 | 946.98 | 3.93   |
| P0A7W4 RS5_SALTY 30S ribosomal protein S5           | 3  |                | AYGSTNPINVVR                | 126 | 12 | 23 | 167.94 | b2b3b4b5b6°b6*b6b11*b11y2y3y4*y4y5y6y7y8y9*y9y10*y10y11y12                      | 1290.68 | 51.984  | 231210 | 2 | 645.84 | -2.55  |
| P0A7W4 RS5_SALTY 30S ribosomal protein S5           | 4  |                | ATIDGLENMNEMVAAKR           | 138 | 19 | 18 | 134.18 | b2°b2b8b10y1y3y4y5y8y9°y9y10y11y12*y12y13y16y17                                 | 2046.99 | 59.888  | 160020 | 3 | 683.00 | -4.17  |
| P0A7W4 RS5_SALTY 30S ribosomal protein S5           | 5  |                | SVEEILGK                    | 159 | 8  | 4  | 33.63  | b4b7y6y8                                                                        | 874.48  | 51.257  | 131555 | 2 | 437.74 | -13.68 |
| P0A7W4 RS5_SALTY 30S ribosomal protein S5           | 6  |                | ATIDGLENMNEMVAAK            | 138 | 18 | 13 | 113.22 | b15b16y2y3y4y5y7y10y11y12y13y15y18                                              | 1890.90 | 64.306  | 93702  | 2 | 945.95 | 4.52   |
| P0A7W4 RS5_SALTY 30S ribosomal protein S5           | 7  |                | EVPAAIQK                    | 54  | 8  | 5  | 38.4   | y3*y3y4y6y8                                                                     | 855.48  | 30.907  | 35221  | 2 | 428.24 | -12.70 |
| P0A7W4 RS5_SALTY 30S ribosomal protein S5           | 8  |                | AREVPAAIQK                  | 52  | 10 | 6  | 36.93  | b4b6b7y2y6y10                                                                   | 1082.63 | 29.754  | 25638  | 2 | 541.82 | -5.64  |
| P0A7W4 RS5_SALTY 30S ribosomal protein S5           | 9  |                | NMINVALNNGTLQHPVK           | 69  | 17 | 5  | 27.36  | b1b3b7y9y10                                                                     | 1862.97 | 63.768  | 24606  | 3 | 621.66 | -10.75 |
| P0A7W4 RS5_SALTY 30S ribosomal protein S5           | 10 |                | VGFGYGK                     | 45  | 7  | 3  | 37.9   | y3y5y6                                                                          | 727.37  | 40.781  | 42213  | 2 | 364.19 | -15.36 |
| P0A7W4 RS5_SALTY 30S ribosomal protein S5           | 11 |                | LIAVNR                      | 14  | 6  | 3  | 25.1   | y4*y4y5                                                                         | 685.43  | 33.935  | 36373  | 1 | 685.43 | -8.37  |
| P0A7W4 RS5_SALTY 30S ribosomal protein S5           | 12 |                | IFSFTALTTVGDGNGRVGFGYGK     | 29  | 23 | 3  | 18.37  | b4b6b12                                                                         | 2362.22 | 95.433  | 11735  | 3 | 788.08 | 0.52   |
| P0A7W4 RS5_SALTY 30S ribosomal protein S5           | 13 |                | AHIEKQAGELQEK               | 1   | 13 | 5  | 18.63  | b9y3*y3y10°y10                                                                  | 1480.76 | 40.135  | 11012  | 3 | 494.26 | -9.73  |
| P0A7W4 RS5_SALTY 30S ribosomal protein S5           | 14 |                | GVHTGSRVFMQPASEGTGHIAGGA MR | 86  | 26 | 3  | 11.33  | b15y15y17                                                                       | 2587.32 | 136.644 | 8859   | 3 | 863.11 | 14.06  |
| P0A7W4 RS5_SALTY 30S ribosomal protein S5           | 15 |                | MAHIEKQAGELQEK              | 0   | 14 | 5  | 43.06  | b3b4b5y7y10                                                                     | 1611.81 | 60.764  | 2931   | 4 | 403.71 | -5.07  |
| P0A7W4 RS5_SALTY 30S ribosomal protein S5           | 16 |                | NMINVALNNGTLQHPVKGVHTG SR   | 69  | 24 | 8  | 42.36  | b3b5b9*b9b10b11y3y5                                                             | 2557.37 | 102.064 | 2442   | 4 | 640.10 | 10.12  |
| P0A7W4 RS5_SALTY 30S ribosomal protein S5           | 17 |                | QAGELQEKLIAVNR              | 6   | 14 | 4  | 25.15  | b8b9b13°b13                                                                     | 1568.88 | 62.469  | 1867   | 3 | 523.63 | 1.17   |
| P0A7W4 RS5_SALTY 30S ribosomal protein S5           | 18 | Oxidation+M(3) | VFMQPASEGTGHIAGGAMR         | 93  | 19 | 4  | 13.48  | b5y12y15°y15                                                                    | 1908.94 | 62.504  | 8692   | 2 | 954.98 | 7.35   |
| P0A7W4 RS5_SALTY 30S ribosomal protein S5           | 19 |                | LEVAGVHNVLAK                | 114 | 12 | 4  | 25.94  | b3b6b8*b8                                                                       | 1249.71 | 61.431  | 86370  | 2 | 625.36 | -13.87 |
| P0A7W4 RS5_SALTY 30S ribosomal protein S5           | 20 |                | EVAGVHNVLAK                 | 115 | 11 | 3  | 14.6   | b4b8°b8                                                                         | 1136.64 | 61.396  | 13429  | 2 | 568.82 | -5.48  |
| Q7CQ05 GRCA_SALTY Autonomous glycy radical cofactor | 1  |                | LGEIEYR                     | 48  | 7  | 11 | 77.83  | b2b3b6y2y3°y3y4y5y6°y6y7                                                        | 879.45  | 43.101  | 239489 | 2 | 440.23 | -12.98 |
| Q7CQ05 GRCA_SALTY Autonomous glycy radical cofactor | 2  |                | MITGIQITK                   | 0   | 9  | 11 | 60.49  | b1b2b3y2y3y4°y4*y4y6y7y9                                                        | 1004.57 | 55.755  | 227330 | 2 | 502.79 | -9.84  |
| Q7CQ05 GRCA_SALTY Autonomous glycy radical cofactor | 3  |                | SGFAEDEVVAVSK               | 35  | 13 | 15 | 106.22 | b3b4°b4b5b9y1y2°y2y4y6y7y8y9y10y13                                              | 1337.65 | 55.185  | 226671 | 2 | 669.33 | -2.83  |
| Q7CQ05 GRCA_SALTY Autonomous glycy radical cofactor | 4  |                | EIPMEVKPEVR                 | 55  | 11 | 9  | 76.8   | y2y4y5y6y7y8°y8y9y11                                                            | 1326.71 | 49.464  | 111716 | 2 | 663.86 | -0.83  |
| Q7CQ05 GRCA_SALTY Autonomous glycy radical cofactor | 5  |                | FNSLTPEQQR                  | 106 | 10 | 15 | 93.13  | b2*b2b3°b3b5b10y3*y3y5y6y7y8*y8y9y10                                            | 1219.60 | 39.013  | 103513 | 2 | 610.30 | -6.51  |

|                                                      |    |                      |                          |     |    |    |        |                                                                                                            |         |         |        |   |         |        |
|------------------------------------------------------|----|----------------------|--------------------------|-----|----|----|--------|------------------------------------------------------------------------------------------------------------|---------|---------|--------|---|---------|--------|
| Q7CQ05 GRCA_SALTY Autonomous glycyl radical cofactor | 6  |                      | FNSLTPEQQRDVIR           | 106 | 15 | 15 | 68.13  | b2°b2b3°b3°b3b7b8y1y3y4y6y10°y10y13y15                                                                     | 1773.90 | 48.327  | 90815  | 3 | 591.97  | -11.29 |
| Q7CQ05 GRCA_SALTY Autonomous glycyl radical cofactor | 7  |                      | VEGGQHNLNVNVL            | 66  | 13 | 7  | 87.09  | y3y4y5y6y7y8y11                                                                                            | 1434.76 | 51.047  | 136018 | 3 | 478.92  | -17.61 |
| Q7CQ05 GRCA_SALTY Autonomous glycyl radical cofactor | 8  |                      | TFTESL                   | 121 | 6  | 5  | 40.42  | b3°b3b5°b5y4                                                                                               | 697.34  | 56.197  | 80259  | 1 | 697.34  | -3.50  |
| Q7CQ05 GRCA_SALTY Autonomous glycyl radical cofactor | 9  |                      | AANDDLLNSFWLLDSEK        | 9   | 17 | 4  | 27.36  | b3b4y10y13                                                                                                 | 1950.99 | 101.553 | 4689   | 2 | 976.00  | 21.59  |
| Q7CQ05 GRCA_SALTY Autonomous glycyl radical cofactor | 10 |                      | AANDDLLNSFWLLDSEKGEAR    | 9   | 21 | 32 | 277.67 | b3b4b5°b5°b5b6°b6°b6b7°b7b9b14y3y4y5y6°y6y7y8°y8y9°y9y10y11y12y13y14y15y16y17y18y19                        | 2364.14 | 93.271  | 455838 | 3 | 788.72  | -2.38  |
| Q7CQ05 GRCA_SALTY Autonomous glycyl radical cofactor | 11 |                      | SGFAEDEVVAVSKLGEIEYR     | 35  | 20 | 3  | 21.14  | b15y5y6                                                                                                    | 2198.11 | 116.108 | 26279  | 3 | 733.37  | 3.67   |
| Q7CQ05 GRCA_SALTY Autonomous glycyl radical cofactor | 12 | Carbamidomethyl+C(1) | CIVAKSGFAEDEVVAVSK       | 30  | 18 | 4  | 14.03  | b8y13°y13y15                                                                                               | 1908.97 | 76.303  | 4899   | 2 | 954.99  | -2.69  |
| Q7CQ05 GRCA_SALTY Autonomous glycyl radical cofactor | 13 |                      | DVIARTFTESL              | 116 | 11 | 5  | 48.48  | b7b9y4y6y9                                                                                                 | 1251.64 | 63.697  | 2937   | 2 | 626.33  | -10.63 |
| Q7CQ05 GRCA_SALTY Autonomous glycyl radical cofactor | 14 |                      | PMEVKPEVR                | 57  | 9  | 3  | 29.1   | b3b4b7                                                                                                     | 1084.58 | 49.473  | 106869 | 2 | 542.79  | -6.19  |
| Q7CQ05 GRCA_SALTY Autonomous glycyl radical cofactor | 15 |                      | TGIQITK                  | 2   | 7  | 2  | 21.82  | b4b5                                                                                                       | 760.46  | 55.740  | 9208   | 1 | 760.46  | 7.62   |
| Q7CQ05 GRCA_SALTY Autonomous glycyl radical cofactor | 16 |                      | EIPMEVKPEVR              | 55  | 11 | 0  | 2.98   |                                                                                                            | 1308.68 | 49.468  | 39170  | 3 | 436.90  | -12.31 |
| P0A1H5 EFTU_SALTY Elongation factor Tu               | 1  |                      | MVVTLIHPIAMDDGLR         | 358 | 16 | 26 | 193.29 | b1b2b3b4°b4b5°b5b6y1y3y4y5°y5y6y7y8y9°y9y10°y10y11°y11y12y13y15y16                                         | 1780.92 | 79.814  | 694534 | 3 | 594.31  | -12.75 |
| P0A1H5 EFTU_SALTY Elongation factor Tu               | 2  |                      | AIDKPFLPIEDVFSISGR       | 205 | 19 | 22 | 141.88 | b2b6b7b8b9b12y2y3y4y5y6°y6y7y8°y8y9°y9y11°y11y15°y15y19                                                    | 2117.14 | 105.404 | 499829 | 3 | 706.39  | -10.15 |
| P0A1H5 EFTU_SALTY Elongation factor Tu               | 3  |                      | ELLSQYDFPGDDTPIVR        | 155 | 17 | 25 | 177.55 | b2°b2b5°b5°b5b6°b6b7b12b16y1y3y4y5y6y8y9y10y11°y11y12°y12y13y14y17                                         | 1964.97 | 77.575  | 325075 | 2 | 982.99  | 6.27   |
| P0A1H5 EFTU_SALTY Elongation factor Tu               | 4  |                      | AGENVGVLLR               | 270 | 10 | 10 | 69.31  | b4°b4y1y2y3y4y5y6y7°y7                                                                                     | 1027.58 | 57.212  | 276404 | 2 | 514.29  | -10.10 |
| P0A1H5 EFTU_SALTY Elongation factor Tu               | 5  |                      | TTLTAAITTVLAK            | 25  | 13 | 15 | 117.98 | b2°b2b4°b4b13y2y3y4y5y6y7y8y9y10y11                                                                        | 1303.78 | 85.335  | 242810 | 2 | 652.39  | -2.34  |
| P0A1H5 EFTU_SALTY Elongation factor Tu               | 6  |                      | TTDVTGTIELPEGVEMVMPGDNIK | 334 | 24 | 38 | 234.6  | b2°b2b3°b3b4°b4b5°b5b7°b7b8°b8b10°b10b12b13b14°b14b15b16b17°b17b18y3°y3y5y6°y6°y6y7y8y9y10y14°y14y15y16y24 | 2546.25 | 87.399  | 233124 | 2 | 1273.63 | 4.22   |
| P0A1H5 EFTU_SALTY Elongation factor Tu               | 7  |                      | IIELAGFLDSYIPEPER        | 188 | 17 | 26 | 221.95 | b2b3b4b5b6b7b11b12°b12b14y1y2y3y4y5°y5y7y8y9y10y12y13y14°y14y15y17                                         | 1962.03 | 102.544 | 215536 | 2 | 981.52  | 4.73   |
| P0A1H5 EFTU_SALTY Elongation factor Tu               | 8  |                      | QVGVPYIIVFLNK            | 124 | 13 | 9  | 70.86  | b3b4b13y4y5y6y9y11y13                                                                                      | 1489.88 | 99.744  | 211817 | 2 | 745.44  | 1.72   |
| P0A1H5 EFTU_SALTY Elongation factor Tu               | 9  | Carbamidomethyl+C(3) | STCTGVEMFR               | 253 | 10 | 10 | 76.3   | b1y2y3y4y5°y5y6y7y8y10                                                                                     | 1187.51 | 53.768  | 124971 | 2 | 594.26  | -4.63  |
| P0A1H5 EFTU_SALTY Elongation factor Tu               | 10 | Carbamidomethyl+C(1) | CDMVDDDEELLELVEMEV       | 137 | 18 | 10 | 54.04  | y3°y3y5y6°y6y8°y8y9°y9y11                                                                                  | 2224.01 | 106.495 | 45139  | 2 | 1112.51 | 10.54  |



|                                        |    |                       |                                      |     |    |    |        |                                                                       |         |         |        |   |         |        |
|----------------------------------------|----|-----------------------|--------------------------------------|-----|----|----|--------|-----------------------------------------------------------------------|---------|---------|--------|---|---------|--------|
| P0A1H5 EFTU_SALTY Elongation factor Tu | 11 |                       | NMITGAAQMDGAILVVAATDGP MPQTR         | 90  | 27 | 8  | 36.18  | b2b3b13y8y11*y11y12y13                                                | 2729.36 | 127.287 | 6810   | 3 | 910.46  | 6.17   |
| P0A1H5 EFTU_SALTY Elongation factor Tu | 12 |                       | GITINTSHVEYDTPTR                     | 59  | 16 | 6  | 25.02  | b10y5y8°y8y11°y11                                                     | 1803.90 | 60.910  | 6691   | 2 | 902.45  | 6.56   |
| P0A1H5 EFTU_SALTY Elongation factor Tu | 13 |                       | VGEEVEIVGIK                          | 238 | 11 | 8  | 38.39  | b2b4°b4b7b10y2y3y11                                                   | 1171.67 | 45.943  | 6528   | 2 | 586.34  | 10.11  |
| P0A1H5 EFTU_SALTY Elongation factor Tu | 14 |                       | ALEGDAEWEAK                          | 177 | 11 | 4  | 33.62  | b3b4b10y8                                                             | 1218.56 | 47.378  | 189740 | 2 | 609.78  | -2.91  |
| P0A1H5 EFTU_SALTY Elongation factor Tu | 15 |                       | TVGAGVVAK                            | 382 | 9  | 6  | 60.49  | b7°b7y3y5y7y8                                                         | 801.47  | 29.361  | 184482 | 2 | 401.24  | -20.94 |
| P0A1H5 EFTU_SALTY Elongation factor Tu | 16 |                       | TKPHVNVGTIGHVDH GK                   | 8   | 17 | 3  | 14.67  | b3b12y8                                                               | 1795.93 | 90.671  | 50277  | 3 | 599.32  | -12.37 |
| P0A1H5 EFTU_SALTY Elongation factor Tu | 17 | Carbamidomethyl+C(7)  | HYAHVDCPGHADYVK                      | 75  | 15 | 4  | 16.31  | b3b5y4°y4                                                             | 1768.75 | 39.406  | 17517  | 4 | 442.94  | -18.70 |
| P0A1H5 EFTU_SALTY Elongation factor Tu | 18 |                       | LLDEGR                               | 264 | 6  | 1  | 12.8   | b5                                                                    | 702.38  | 27.630  | 13422  | 1 | 702.38  | -2.09  |
| P0A1H5 EFTU_SALTY Elongation factor Tu | 19 |                       | GIHK                                 | 234 | 4  | 1  | 11.81  | y3                                                                    | 430.30  | 45.870  | 4891   | 1 | 430.30  | -3.48  |
| P0A1H5 EFTU_SALTY Elongation factor Tu | 20 |                       | LLDEGRAGENVG VLLR                    | 264 | 16 | 11 | 64.51  | b7°b7b8b9°b9b10°b10b11° b11*b11b15                                    | 1710.93 | 66.064  | 13064  | 3 | 570.98  | -8.63  |
| P0A1H5 EFTU_SALTY Elongation factor Tu | 21 |                       | GYRPQFYFR TTDVTGTIELPEGVE MVMPGDN IK | 325 | 33 | 13 | 31.9   | b4b11°b11b28y4°y4y6°y6* y6y10y11°y11y28                               | 3760.87 | 136.418 | 3874   | 3 | 1254.30 | 10.32  |
| P0A1H5 EFTU_SALTY Elongation factor Tu | 22 |                       | HTPFKGYRQFYFR                        | 319 | 15 | 6  | 26.7   | b10°b10y3y4y8*y8                                                      | 1990.99 | 80.380  | 3829   | 2 | 996.00  | -7.11  |
| P0A1H5 EFTU_SALTY Elongation factor Tu | 23 | Carbamidomethyl+C(14) | QVGVPYIIVFLNKCDMVDDEELLE LVEMEV R    | 124 | 31 | 4  | 20.56  | b3y3y4y7                                                              | 3694.82 | 127.835 | 3819   | 3 | 1232.28 | -6.48  |
| P0A1H5 EFTU_SALTY Elongation factor Tu | 24 |                       | ARGITINTSHVEYDTPTR                   | 57  | 18 | 3  | 21.19  | y6y9y12                                                               | 2031.04 | 68.194  | 2287   | 3 | 677.69  | 9.38   |
| P0A1H5 EFTU_SALTY Elongation factor Tu | 25 |                       | ALEGDAEWEAKIIELAGFLDSYIPE PER        | 177 | 28 | 4  | 11.08  | b5b11°b11y9                                                           | 3161.58 | 84.310  | 1826   | 3 | 1054.53 | 4.86   |
| P0A1H5 EFTU_SALTY Elongation factor Tu | 26 | Oxidation+M(1)        | MVVTLIHPIAMDDGLR                     | 358 | 16 | 4  | 37.19  | y5y8y9y10                                                             | 1796.92 | 74.486  | 32293  | 3 | 599.65  | -8.90  |
| P0A1H5 EFTU_SALTY Elongation factor Tu | 27 | Oxidation+M(18)       | TTDVTGTIELPEGVEMVMPGDNI K            | 334 | 24 | 7  | 20.78  | b6b11°b11y4y8*y8y10                                                   | 2562.26 | 87.282  | 3151   | 2 | 1281.63 | 9.34   |
| P0A1H5 EFTU_SALTY Elongation factor Tu | 28 |                       | TGTIELPEGVEMVMPGDNIK                 | 338 | 20 | 4  | 22     | b5°b5b10b11                                                           | 2130.03 | 87.369  | 20309  | 2 | 1065.52 | -5.62  |
| P0A1H5 EFTU_SALTY Elongation factor Tu | 29 |                       | VTLIHPIAMDDGLR                       | 360 | 14 | 5  | 23.13  | b3°b3b5°b5b13                                                         | 1550.83 | 79.795  | 20165  | 2 | 775.92  | -0.87  |
| P0A1H5 EFTU_SALTY Elongation factor Tu | 30 |                       | TLIHPIAMDDGLR                        | 361 | 13 | 1  | 7.35   | b10                                                                   | 1451.77 | 79.808  | 1762   | 2 | 726.39  | -1.35  |
| P0AA28 THIO_SALTY Thioredoxin-1        | 1  |                       | LNIDQNPGTAPK                         | 58  | 12 | 27 | 152.63 | b2*b2b3b6°b6°b6b7°b7b10y1y2y3y4y5y6°y6y7y8°y8*y8y9°y9*y9y10°y10y11y12 | 1267.66 | 39.511  | 179353 | 2 | 634.33  | -6.16  |
| P0AA28 THIO_SALTY Thioredoxin-1        | 2  |                       | MIAPILDEIADEYQGK                     | 37  | 16 | 15 | 127.38 | b2b3y2y3*y3y4y5y7y9y10y11y12y13y14y16                                 | 1805.91 | 94.308  | 145118 | 2 | 903.46  | 4.93   |
| P0AA28 THIO_SALTY Thioredoxin-1        | 3  |                       | GIPTLLLFK                            | 74  | 9  | 9  | 63.5   | b2y1y2y3y4y5y6y7y9                                                    | 1001.63 | 91.533  | 96053  | 2 | 501.32  | -7.37  |
| P0AA28 THIO_SALTY Thioredoxin-1        | 4  |                       | EFLDANLA                             | 101 | 8  | 9  | 47.69  | b2b5°b5b7b8°b8°b8y6y7                                                 | 892.43  | 71.103  | 10423  | 1 | 892.43  | -11.76 |
| P0AA28 THIO_SALTY Thioredoxin-1        | 5  |                       | VGALSK                               | 91  | 6  | 2  | 25.1   | b5y5                                                                  | 574.35  | 39.427  | 16657  | 1 | 574.35  | -7.44  |
| P0AA28 THIO_SALTY Thioredoxin-1        | 6  |                       | IIHLTDDSFDTDV LK                     | 4   | 15 | 3  | 16.31  | b8b10y9                                                               | 1731.85 | 69.574  | 1817   | 2 | 866.43  | -16.14 |
| P0AA28 THIO_SALTY Thioredoxin-1        | 7  |                       | MIAPILDEIADEYQGKLTVAK                | 37  | 21 | 11 | 79.77  | b3b11y4y5y7y11y12*y12y16y18y19                                        | 2318.23 | 95.449  | 192934 | 3 | 773.41  | -0.53  |

|                                             |    |                       |                               |     |    |    |        |                                                                                    |         |         |        |   |         |        |
|---------------------------------------------|----|-----------------------|-------------------------------|-----|----|----|--------|------------------------------------------------------------------------------------|---------|---------|--------|---|---------|--------|
| P0AA28 THIO_SALTY Thioredoxin-1             | 8  | Oxidation+M(1)        | MIAPILDEIADEYQGK              | 37  | 16 | 6  | 21.61  | b8b13°b13y9y13°y13                                                                 | 1821.88 | 123.554 | 1916   | 2 | 911.44  | -7.77  |
| P0A297 RL10_SALTY 50S ribosomal protein L10 | 1  |                       | LATLPTYEEAIAR                 | 125 | 13 | 16 | 112.24 | b2b3°b3b4°b4b7y1y2y4y6y8y9y10y11y12y13                                             | 1447.78 | 65.992  | 142235 | 2 | 724.39  | -0.84  |
| P0A297 RL10_SALTY 50S ribosomal protein L10 | 2  |                       | AAAFEGELIPASQIDR              | 109 | 16 | 24 | 153.91 | b1b3b5b7b8°b8b9b11y1y2°y2y5°y5°y5y6°y6y7y8y9y10y11y12°y12y16                       | 1687.87 | 69.590  | 91022  | 2 | 844.44  | 5.42   |
| P0A297 RL10_SALTY 50S ribosomal protein L10 | 3  |                       | GALSAVVADSR                   | 20  | 11 | 7  | 48.93  | b3y2y3y4y5y7y11                                                                    | 1045.56 | 49.201  | 59807  | 2 | 523.28  | -8.17  |
| P0A297 RL10_SALTY 50S ribosomal protein L10 | 4  |                       | DTFVGPTLIAYSMEHPGAAAR         | 73  | 21 | 7  | 35.49  | b3b4b5°b5b11y14°y14                                                                | 2204.09 | 76.893  | 22053  | 3 | 735.37  | 5.32   |
| P0A297 RL10_SALTY 50S ribosomal protein L10 | 5  | Carbamidomethyl+C(9)  | VVEGTQFECLK                   | 62  | 11 | 3  | 22.11  | b4b7y5                                                                             | 1309.67 | 68.350  | 5435   | 2 | 655.34  | 19.76  |
| P0A297 RL10_SALTY 50S ribosomal protein L10 | 6  |                       | GVTVDKMTCLR                   | 31  | 11 | 3  | 29.1   | y4y5y7                                                                             | 1248.65 | 48.313  | 8972   | 2 | 624.83  | -11.83 |
| P0A297 RL10_SALTY 50S ribosomal protein L10 | 7  |                       | FEVKAAAFEGELIPASQIDR          | 105 | 20 | 3  | 19.8   | y5y11y15                                                                           | 2191.12 | 76.156  | 6975   | 4 | 548.53  | -10.03 |
| P0A297 RL10_SALTY 50S ribosomal protein L10 | 8  |                       | AAAFEGELIPASQIDRLATLPTYEEAIAR | 109 | 29 | 7  | 29.06  | b5b6b11b18b25°b25y4                                                                | 3116.59 | 100.856 | 6301   | 3 | 1039.53 | -13.16 |
| P0A297 RL10_SALTY 50S ribosomal protein L10 | 9  | Carbamidomethyl+C(10) | RVVEGTQFECLK                  | 61  | 12 | 5  | 52.69  | y4°y4y6y9y11                                                                       | 1465.73 | 65.404  | 2601   | 2 | 733.37  | -12.49 |
| P0A297 RL10_SALTY 50S ribosomal protein L10 | 10 |                       | AGREAGVYMR                    | 43  | 10 | 7  | 80.83  | b6b9y3y4y5y7y8                                                                     | 1109.55 | 64.410  | 1896   | 2 | 555.28  | -2.75  |
| P0A297 RL10_SALTY 50S ribosomal protein L10 | 11 | Oxidation+M(13)       | DTFVGPTLIAYSMEHPGAAAR         | 73  | 21 | 3  | 12.6   | b11y9y12                                                                           | 2220.09 | 71.040  | 12663  | 3 | 740.70  | 5.17   |
| P0A297 RL10_SALTY 50S ribosomal protein L10 | 12 | Oxidation+M(9)        | AGREAGVYMR                    | 43  | 10 | 4  | 36.13  | b4b7y5y9                                                                           | 1125.54 | 103.747 | 1633   | 1 | 1125.54 | -4.66  |
| P0A1D3 CH60_SALTY 60 kDa chaperonin         | 1  |                       | EMLPVLEAVAK                   | 231 | 11 | 10 | 79.81  | b2°b2y1y3y4y5y7y8y9y11                                                             | 1199.67 | 80.860  | 190028 | 2 | 600.34  | -4.27  |
| P0A1D3 CH60_SALTY 60 kDa chaperonin         | 2  |                       | ANDAAGDGTTTATVLAQSIITEGLK     | 80  | 25 | 31 | 205.08 | b2°b2b3°b3b4°b4°b4b5b6b14b15°b15b16b18°b18y1y3y4°y4y5y6y7y8y9°y9y10y11y12y13y18y25 | 2418.23 | 92.748  | 183301 | 3 | 806.75  | -1.62  |
| P0A1D3 CH60_SALTY 60 kDa chaperonin         | 3  |                       | VVINKDTTTHIDGVGEEAAIQGR       | 322 | 23 | 9  | 53.18  | b2b3y2y3y4y5y6y9y12                                                                | 2399.27 | 68.540  | 150366 | 3 | 800.43  | -1.93  |
| P0A1D3 CH60_SALTY 60 kDa chaperonin         | 4  |                       | AVAAAVEELK                    | 122 | 10 | 11 | 69.31  | b1b2b3y2y3°y3y5y6y7y8y10                                                           | 1000.56 | 48.352  | 149353 | 2 | 500.78  | -9.82  |
| P0A1D3 CH60_SALTY 60 kDa chaperonin         | 5  | Carbamidomethyl+C(18) | SALQYAASVAGLMITTECMVTDLPK     | 501 | 25 | 14 | 63.1   | b1b3b5°b5b9b11y2y3y6°y6y7y8y9y25                                                   | 2670.32 | 125.367 | 125697 | 3 | 890.78  | 0.18   |
| P0A1D3 CH60_SALTY 60 kDa chaperonin         | 6  |                       | SFGAPTITK                     | 42  | 9  | 8  | 49.95  | b2b3°b3y1y2y3y5y7                                                                  | 921.49  | 45.967  | 124514 | 2 | 461.25  | -13.05 |
| P0A1D3 CH60_SALTY 60 kDa chaperonin         | 7  |                       | GVNVLADAVK                    | 18  | 10 | 9  | 85.6   | b2b3b4b5b7y3y6y8y10                                                                | 985.56  | 56.964  | 116477 | 2 | 493.28  | -12.70 |
| P0A1D3 CH60_SALTY 60 kDa chaperonin         | 8  | Carbamidomethyl+C(6)  | QIVLNCGEEPSVVANTVK            | 452 | 18 | 16 | 93.01  | b6°b6b7b10b13°b13y5y6y9y12y13°y13y14y15y18°y18                                     | 1957.01 | 62.586  | 102105 | 2 | 979.01  | 4.55   |
| P0A1D3 CH60_SALTY 60 kDa chaperonin         | 9  |                       | QQIEEATSDYDREK                | 350 | 14 | 11 | 88.58  | b8b14y3y5y6y7y8y9y11y14°y14                                                        | 1711.75 | 34.587  | 100074 | 3 | 571.26  | -13.69 |
| P0A1D3 CH60_SALTY 60 kDa chaperonin         | 10 | Carbamidomethyl+C(6)  | ALSVPSCDSK                    | 132 | 10 | 12 | 81.62  | b2b3°b3y2y4y5y6°y6y7y8y9y10                                                        | 1063.50 | 36.346  | 92991  | 2 | 532.25  | -7.12  |
| P0A1D3 CH60_SALTY 60 kDa chaperonin         | 11 |                       | AIAQVGTISANSDETGVGK           | 142 | 18 | 14 | 85.98  | b4b7b12°b12y2y9y10y11y12y13°y13°y13y14y18                                          | 1760.91 | 49.352  | 66695  | 2 | 880.96  | 3.60   |
| P0A1D3 CH60_SALTY 60 kDa chaperonin         | 12 |                       | VEDALHATR                     | 395 | 9  | 9  | 83.34  | b1b3b4y3y4y6y7y8y9                                                                 | 1011.51 | 27.336  | 60505  | 2 | 506.26  | -6.82  |

|                                      |    |                       |                                                 |     |    |    |        |                                                                   |         |         |        |   |         |        |
|--------------------------------------|----|-----------------------|-------------------------------------------------|-----|----|----|--------|-------------------------------------------------------------------|---------|---------|--------|---|---------|--------|
| [P0A1D3]CH60_SALTY 60 kDa chaperonin | 13 |                       | AVAAGMNPMDLK                                    | 105 | 12 | 10 | 78.14  | b2b3y2y5y6y7y8y9y10y12                                            | 1217.60 | 59.296  | 47861  | 2 | 609.30  | -0.80  |
| [P0A1D3]CH60_SALTY 60 kDa chaperonin | 14 |                       | AVAAGMNPMDLKR                                   | 105 | 13 | 17 | 113.79 | b2b3b8b13y2y3y5y6*y6y7*y7y8y9y10*y10y11y13                        | 1373.71 | 51.807  | 46932  | 2 | 687.36  | 3.11   |
| [P0A1D3]CH60_SALTY 60 kDa chaperonin | 15 |                       | GGDGNYGYNAAATEEYGNMIDMG ILDPTK                  | 470 | 28 | 7  | 31.03  | y2y3y4y9y12y14y28                                                 | 2966.32 | 89.089  | 45513  | 3 | 989.44  | 11.93  |
| [P0A1D3]CH60_SALTY 60 kDa chaperonin | 16 |                       | LIAEAMDK                                        | 160 | 8  | 5  | 38.4   | y2y3y5y6y8                                                        | 890.46  | 40.244  | 23856  | 2 | 445.73  | -10.90 |
| [P0A1D3]CH60_SALTY 60 kDa chaperonin | 17 |                       | SFGAPTITKDGVSVAR                                | 42  | 16 | 5  | 31.87  | b3b4b15y7y10                                                      | 1605.86 | 55.930  | 13823  | 2 | 803.43  | -1.37  |
| [P0A1D3]CH60_SALTY 60 kDa chaperonin | 18 |                       | AGKPLIIAEDVEGEALATLVVNT MR                      | 242 | 26 | 7  | 11.33  | b2b7y1y2y5y8*y8                                                   | 2723.54 | 136.321 | 12066  | 3 | 908.52  | 13.80  |
| [P0A1D3]CH60_SALTY 60 kDa chaperonin | 19 |                       | SDAPDLGAAGGMGGMGGMGGM M                         | 526 | 22 | 5  | 18.77  | b2b3b6*b6b8                                                       | 1927.77 | 81.195  | 8197   | 2 | 964.39  | 14.06  |
| [P0A1D3]CH60_SALTY 60 kDa chaperonin | 20 |                       | ATLEDLGQAK                                      | 311 | 10 | 3  | 31.61  | b4b5b9                                                            | 1045.55 | 37.321  | 228113 | 2 | 523.28  | 1.40   |
| [P0A1D3]CH60_SALTY 60 kDa chaperonin | 21 |                       | LAGGVAVIK                                       | 371 | 9  | 6  | 74.05  | b5b6y3y4y7y8                                                      | 827.52  | 46.072  | 126783 | 2 | 414.26  | -20.06 |
| [P0A1D3]CH60_SALTY 60 kDa chaperonin | 22 |                       | GQNEDQNVGIK                                     | 430 | 11 | 3  | 22.11  | b10y3y5                                                           | 1201.56 | 38.818  | 9408   | 2 | 601.28  | -19.20 |
| [P0A1D3]CH60_SALTY 60 kDa chaperonin | 23 |                       | VTLGPK                                          | 28  | 6  | 3  | 37.41  | b3y4y5                                                            | 614.38  | 29.296  | 5844   | 1 | 614.38  | -4.87  |
| [P0A1D3]CH60_SALTY 60 kDa chaperonin | 24 |                       | DTTTIIDGVGEEAAIQGR                              | 327 | 18 | 7  | 42.11  | b3b4b9*b9b12b15y12                                                | 1845.90 | 122.867 | 2241   | 2 | 923.46  | -8.07  |
| [P0A1D3]CH60_SALTY 60 kDa chaperonin | 25 |                       | EIELEDK                                         | 58  | 7  | 3  | 37.9   | y3y5y6                                                            | 875.43  | 43.207  | 2070   | 2 | 438.22  | -2.79  |
| [P0A1D3]CH60_SALTY 60 kDa chaperonin | 26 |                       | FGNDAR                                          | 7   | 6  | 2  | 25.1   | b3y5                                                              | 679.33  | 74.059  | 1791   | 1 | 679.33  | 13.66  |
| [P0A1D3]CH60_SALTY 60 kDa chaperonin | 27 |                       | GYLYFINKPETGAVELEFILLADK K                      | 197 | 29 | 14 | 89.52  | b3b4*b4b7y3y4*y4y5y6y7y9y12y25y26                                 | 3239.71 | 96.510  | 238453 | 4 | 810.68  | -3.39  |
| [P0A1D3]CH60_SALTY 60 kDa chaperonin | 28 |                       | IADLKGQNEQNVGIK                                 | 425 | 16 | 16 | 130.39 | b3*b3y3y4y6y8*y8y9*y9y11y12*y12y13y14y15*y15                      | 1741.89 | 40.972  | 143513 | 3 | 581.30  | -12.33 |
| [P0A1D3]CH60_SALTY 60 kDa chaperonin | 29 |                       | EIELEDKFENMGAMVK                                | 58  | 17 | 5  | 20.37  | b3*b3b9y6y8                                                       | 2010.94 | 74.190  | 141810 | 3 | 670.99  | -4.86  |
| [P0A1D3]CH60_SALTY 60 kDa chaperonin | 30 | Carbamidomethyl+C(16) | AVAAAVEELKALSVPSCDSK                            | 122 | 20 | 4  | 29.72  | y3y6y10y18                                                        | 2045.05 | 72.894  | 85051  | 3 | 682.35  | -6.15  |
| [P0A1D3]CH60_SALTY 60 kDa chaperonin | 31 |                       | AMLQDIATLTGGTVISEEIGMELE KATLEDLGQAK            | 286 | 35 | 24 | 106.77 | b3b4b6*b6*b6b8*b8b9b15y4y6*y6y7y9*y9y12*y12y17y21y25*y25y26y27y29 | 3675.88 | 122.880 | 49692  | 3 | 1225.96 | 1.39   |
| [P0A1D3]CH60_SALTY 60 kDa chaperonin | 32 | Carbamidomethyl+C(13) | AMEAPLRQIVLNCGEEPSVVANT VK                      | 445 | 25 | 14 | 70.71  | b3b6b7*b7b9*b9b10b11b19y5y9y12*y12y14                             | 2725.41 | 74.894  | 38897  | 3 | 909.14  | 3.05   |
| [P0A1D3]CH60_SALTY 60 kDa chaperonin | 33 |                       | VGKEGVITVEDGTGLQDELDDVVE GMQFDR                 | 168 | 29 | 4  | 20.68  | b11y3y4y12                                                        | 3135.51 | 73.765  | 27427  | 4 | 784.63  | -2.34  |
| [P0A1D3]CH60_SALTY 60 kDa chaperonin | 34 |                       | AIAQVGTISANSDETGVGLIAEAM DK                     | 142 | 26 | 3  | 11.33  | b5y6y21                                                           | 2632.35 | 92.428  | 17439  | 3 | 878.12  | -0.37  |
| [P0A1D3]CH60_SALTY 60 kDa chaperonin | 35 | Carbamidomethyl+C(6)  | ALSVPSCDSKAIAQVGTISANSDE TVGK                   | 132 | 28 | 3  | 21.29  | b18y13y14                                                         | 2805.38 | 100.797 | 12344  | 3 | 935.80  | -3.66  |
| [P0A1D3]CH60_SALTY 60 kDa chaperonin | 36 | Carbamidomethyl+C(6)  | QIVLNCGEEPSVVANTVKGGDGN YGYNAATEEYGNMIDMGILDPTK | 452 | 46 | 6  | 22.86  | b9b13b14y3y9y13                                                   | 4904.27 | 90.202  | 10406  | 4 | 1226.82 | 0.80   |
| [P0A1D3]CH60_SALTY 60 kDa chaperonin | 37 |                       | DGVSVAREIELEDK                                  | 51  | 14 | 3  | 17.37  | b4b6y5                                                            | 1559.79 | 60.099  | 3201   | 3 | 520.60  | -2.43  |
| [P0A1D3]CH60_SALTY 60 kDa chaperonin | 38 |                       | ANDAAGDGTTTATVLAQSIIIEGL KAVAAGMNPMDLK          | 80  | 37 | 3  | 11.08  | b16y3y6                                                           | 3616.85 | 113.355 | 3162   | 3 | 1206.29 | 8.84   |
| [P0A1D3]CH60_SALTY 60 kDa chaperonin | 39 |                       | VGAATEVEMKEK                                    | 380 | 12 | 5  | 29.17  | b6b11*b11y5y9                                                     | 1291.64 | 74.882  | 2358   | 2 | 646.32  | -14.84 |

|                                        |    |                      |                               |     |    |    |        |                                                               |         |         |        |   |         |        |
|----------------------------------------|----|----------------------|-------------------------------|-----|----|----|--------|---------------------------------------------------------------|---------|---------|--------|---|---------|--------|
| [P0A1D3]CH60_SALTY 60 kDa chaperonin   | 40 | Phohoryl STY(6)      | SFGAPTITKDGVSVAR              | 42  | 16 | 3  | 21.96  | b5y11y12                                                      | 1685.81 | 94.483  | 22560  | 2 | 843.41  | -2.10  |
| [P0A1D3]CH60_SALTY 60 kDa chaperonin   | 41 | Oxidation+M(21)      | AMLQDIATLTGGTVISEEIGMELE K    | 286 | 25 | 3  | 11.5   | b11y5y10                                                      | 2665.29 | 93.162  | 21485  | 3 | 889.10  | -14.84 |
| [P0A1D3]CH60_SALTY 60 kDa chaperonin   | 42 | Oxidation+M(22)      | EGVITVEDGTGLQDELDVVEGMQ FDR   | 171 | 26 | 5  | 34.55  | b9°b9b10b11°b11                                               | 2867.36 | 66.050  | 13122  | 3 | 956.46  | 12.86  |
| [P0A1D3]CH60_SALTY 60 kDa chaperonin   | 43 | Oxidation+M(9)       | AVAAGMNPMDLKR                 | 105 | 13 | 7  | 26.74  | b6b8y7°y7*y7y12*y12                                           | 1389.70 | 65.368  | 10968  | 2 | 695.35  | 3.16   |
| [P0A1D3]CH60_SALTY 60 kDa chaperonin   | 44 | Oxidation+M(9)       | VGAATEVEMK                    | 380 | 10 | 3  | 31.61  | b4b6b7                                                        | 1050.51 | 110.868 | 2049   | 1 | 1050.51 | -5.81  |
| [P0A1D3]CH60_SALTY 60 kDa chaperonin   | 45 |                      | AAGMNPMDLKR                   | 107 | 11 | 1  | 7.25   | b3                                                            | 1203.60 | 51.806  | 97575  | 2 | 602.30  | -1.52  |
| [P0A1D3]CH60_SALTY 60 kDa chaperonin   | 46 |                      | EDALHATR                      | 396 | 8  | 2  | 8.27   | b3°b3                                                         | 912.45  | 27.332  | 43436  | 2 | 456.73  | -8.50  |
| [P0A1D3]CH60_SALTY 60 kDa chaperonin   | 47 |                      | AAAVEELK                      | 124 | 8  | 2  | 7.8    | b6°b6                                                         | 830.46  | 48.359  | 22430  | 1 | 830.46  | -7.13  |
| [P0A1D3]CH60_SALTY 60 kDa chaperonin   | 48 |                      | SFGAPTITKDG V                 | 42  | 12 | 0  | 5.46   |                                                               | 1192.63 | 55.891  | 12855  | 2 | 596.82  | 9.83   |
| [P0A1D3]CH60_SALTY 60 kDa chaperonin   | 49 |                      | NVLADAVK                      | 20  | 8  | 0  | 2.48   |                                                               | 829.48  | 56.946  | 9659   | 1 | 829.48  | -3.38  |
| [P0A1D3]CH60_SALTY 60 kDa chaperonin   | 50 |                      | AAVEELK                       | 125 | 7  | 3  | 21.07  | b5°b5b6                                                       | 759.42  | 48.341  | 3500   | 1 | 759.42  | -8.52  |
| [P0A1D3]CH60_SALTY 60 kDa chaperonin   | 51 | Carbamidomethyl+C(4) | SVPCSDSK                      | 134 | 8  | 1  | 7.8    | b4                                                            | 879.39  | 36.356  | 2610   | 1 | 879.39  | -1.25  |
| [P0A1D3]CH60_SALTY 60 kDa chaperonin   | 52 |                      | DVEGEALATLVVNTMR              | 252 | 16 | 4  | 34.55  | b10°b10b11b12                                                 | 1717.87 | 136.372 | 1585   | 2 | 859.44  | -5.76  |
| [P0A1D3]CH60_SALTY 60 kDa chaperonin   | 53 |                      | EMLPVLEAVAK                   | 231 | 11 | 1  | 7.5    | y6                                                            | 1181.65 | 80.878  | 12070  | 2 | 591.33  | -7.54  |
| [P0A1D3]CH60_SALTY 60 kDa chaperonin   | 54 |                      | QQIEEATSDYDREK                | 350 | 14 | 0  | 4.47   |                                                               | 1693.74 | 34.566  | 4187   | 3 | 565.25  | -14.85 |
| [P0A1E3]CYSK_SALTY Cysteine synthase A | 1  |                      | IGANMIWDAEKR                  | 44  | 12 | 12 | 54.74  | b5°b5b7b12y1y2y5y7°y7y9y10y12                                 | 1403.69 | 60.848  | 129290 | 3 | 468.57  | -14.61 |
| [P0A1E3]CYSK_SALTY Cysteine synthase A | 2  |                      | YLLQQFSNPANPEIHEK             | 137 | 18 | 23 | 157.66 | b2b3b4b9°b9b12°b12y3y4y5y6°y6y8y9°y9*y9y10y11°y11y12y15y16y18 | 2141.10 | 74.848  | 118721 | 3 | 714.37  | -2.62  |
| [P0A1E3]CYSK_SALTY Cysteine synthase A | 3  |                      | IQGIGAGFIPGNLDLK              | 226 | 16 | 18 | 92.14  | b2°b2b3b4b8°b8y1y2y3y6y7°y7y10*y10y11y12y14y16                | 1612.91 | 84.249  | 110181 | 2 | 806.96  | 2.57   |
| [P0A1E3]CYSK_SALTY Cysteine synthase A | 4  |                      | LTLTMPETMSIER                 | 87  | 13 | 11 | 78.6   | b5°b5b8b12y1y6y8y9y10y12y13                                   | 1521.77 | 74.708  | 88714  | 2 | 761.39  | 5.21   |
| [P0A1E3]CYSK_SALTY Cysteine synthase A | 5  |                      | GVLKPGVELVEPTSGNTGIALAYV AAAR | 56  | 28 | 4  | 22.1   | y6y7y9y28                                                     | 2753.53 | 82.364  | 82961  | 3 | 918.51  | 3.37   |
| [P0A1E3]CYSK_SALTY Cysteine synthase A | 6  |                      | NIVVILPSSGER                  | 293 | 12 | 9  | 77.05  | b2b3b4y6y7y8y9y10y12                                          | 1283.73 | 64.879  | 53686  | 2 | 642.37  | -0.95  |
| [P0A1E3]CYSK_SALTY Cysteine synthase A | 7  |                      | IYEDNSLTIGHTPLVR              | 3   | 16 | 4  | 28.14  | b7b8y7y14                                                     | 1827.94 | 62.530  | 47747  | 3 | 609.98  | -12.89 |
| [P0A1E3]CYSK_SALTY Cysteine synthase A | 8  |                      | AEEIVASDPQK                   | 126 | 11 | 10 | 79.1   | b2b3b4y2y3y6y7y8y9y11                                         | 1186.59 | 32.563  | 39097  | 2 | 593.80  | -3.81  |
| [P0A1E3]CYSK_SALTY Cysteine synthase A | 9  |                      | VVGITNEEAISTAR                | 246 | 14 | 7  | 38.66  | b3y4y9y10*y10y12y14                                           | 1459.77 | 50.406  | 22576  | 2 | 730.39  | -0.75  |
| [P0A1E3]CYSK_SALTY Cysteine synthase A | 10 |                      | YLSTALFADLFTEK                | 305 | 14 | 3  | 17.37  | b5b11y9                                                       | 1618.83 | 104.012 | 10012  | 2 | 809.92  | -2.04  |
| [P0A1E3]CYSK_SALTY Cysteine synthase A | 11 |                      | IGANMIWDAEK                   | 44  | 11 | 13 | 87.61  | b4°b4b5°b5b6°b6b7°b7b9y4y8y9°y9                               | 1247.62 | 63.673  | 2616   | 2 | 624.31  | 5.19   |
| [P0A1E3]CYSK_SALTY Cysteine synthase A | 12 |                      | YLSTALFADLFTEKELQQ            | 305 | 18 | 4  | 22.36  | b16y5y8y13                                                    | 2117.10 | 103.060 | 107615 | 2 | 1059.05 | 7.15   |
| [P0A1E3]CYSK_SALTY Cysteine synthase A | 13 |                      | LIDKVVGITNEEAISTAR            | 242 | 18 | 7  | 42.11  | b4y3y8y10y11y13*y13                                           | 1929.04 | 60.835  | 95715  | 3 | 643.69  | -12.72 |

|                                              |    |                                        |                                   |     |    |    |        |                                                          |         |         |        |   |         |        |
|----------------------------------------------|----|----------------------------------------|-----------------------------------|-----|----|----|--------|----------------------------------------------------------|---------|---------|--------|---|---------|--------|
| [P0A1E3]CYSK_SALTY Cysteine synthase A       | 14 |                                        | AEEIVASDPQKYLLQQFSNPANP EIHEK     | 126 | 29 | 12 | 80.01  | b3b5b10b12b13b14y3y6y7y9y10y11                           | 3308.66 | 77.914  | 45705  | 4 | 827.92  | -4.72  |
| [P0A1E3]CYSK_SALTY Cysteine synthase A       | 15 |                                        | IGANMIWDAEKR                      | 44  | 12 | 4  | 24.15  | b7b8°b8y5                                                | 1403.69 | 64.371  | 19899  | 2 | 702.35  | -12.35 |
| [P0A1E3]CYSK_SALTY Cysteine synthase A       | 16 |                                        | LQEDESFTNKNIVVILPSSGER            | 283 | 22 | 3  | 22.13  | y5y6y8                                                   | 2475.29 | 70.416  | 19890  | 3 | 825.77  | 8.09   |
| [P0A1E3]CYSK_SALTY Cysteine synthase A       | 17 |                                        | GYKLTLTMPETMSIER                  | 84  | 16 | 3  | 15.43  | b12y6y8                                                  | 1869.96 | 87.170  | 15712  | 2 | 935.49  | 10.05  |
| [P0A1E3]CYSK_SALTY Cysteine synthase A       | 18 |                                        | ILAKVESR                          | 27  | 8  | 3  | 38.4   | y3y4y5                                                   | 915.56  | 72.427  | 12501  | 2 | 458.28  | -5.47  |
| [P0A1E3]CYSK_SALTY Cysteine synthase A       | 19 |                                        | MSKIYEDNSLTIGHTPLVR               | 0   | 19 | 4  | 21.28  | b4b7b13y13                                               | 2174.16 | 90.145  | 9464   | 2 | 1087.58 | 14.26  |
| [P0A1E3]CYSK_SALTY Cysteine synthase A       | 20 |                                        | LMEEEGILAGISSGAAVAAALKLQ EDESFTNK | 261 | 32 | 4  | 10.89  | b8y6y10*y10                                              | 3292.68 | 127.131 | 4190   | 3 | 1098.23 | 6.23   |
| [P0A1E3]CYSK_SALTY Cysteine synthase A       | 21 | Phohoryl STY(8)                        | YLLLQQFSNPANPEIHEK                | 137 | 18 | 10 | 50.56  | b8_H3PO4 b8_HPO3 b8y4°y4y7°y7*y7y8y9*y9y10               | 2221.08 | 64.399  | 16065  | 3 | 741.03  | 7.91   |
| [P0A1E3]CYSK_SALTY Cysteine synthase A       | 22 | Phohoryl STY(4)                        | YLSTALFADLFTEK                    | 305 | 14 | 3  | 17.37  | b3b12y12                                                 | 1698.82 | 64.363  | 8466   | 2 | 849.91  | 13.58  |
| [P0A1E3]CYSK_SALTY Cysteine synthase A       | 23 | Phohoryl STY(12)                       | IYEDNSLTIGHTPLVR                  | 3   | 16 | 9  | 54.84  | b4b7°b7b8b9b11°b11y5y9                                   | 1907.94 | 122.843 | 1817   | 2 | 954.47  | 12.16  |
| [P0A1E3]CYSK_SALTY Cysteine synthase A       | 24 | Oxidation+M(9)                         | LTLTMPETMSIER                     | 87  | 13 | 6  | 49.8   | b7b9b10b12y8y11                                          | 1537.78 | 65.397  | 2851   | 2 | 769.40  | 14.84  |
| [P0A1E3]CYSK_SALTY Cysteine synthase A       | 25 |                                        | ANMIWDAEKR                        | 46  | 10 | 1  | 7.33   | b5                                                       | 1233.61 | 60.897  | 70267  | 2 | 617.31  | 7.03   |
| [P0A1E3]CYSK_SALTY Cysteine synthase A       | 26 |                                        | NSLTIGHTPLVR                      | 7   | 12 | 4  | 13.54  | b4°b4b7*b7                                               | 1307.74 | 62.510  | 5163   | 2 | 654.37  | -4.67  |
| [P0A7K0]RL11_SALTY 50S ribosomal protein L11 | 1  |                                        | AQLQEIAQTK                        | 103 | 10 | 22 | 105.43 | b2*b2b3*b3b4*b4b9y1y2y3°y3y4*y4y5*y5y6°y6y7°y7*y7y8y10   | 1129.61 | 40.000  | 190803 | 2 | 565.31  | -7.56  |
| [P0A7K0]RL11_SALTY 50S ribosomal protein L11 | 2  |                                        | AADMTGADIEAMTR                    | 113 | 14 | 17 | 121.36 | b2b3b5°b5b9y2y3y4y5°y5y6y7°y7y8y9y10y14                  | 1452.65 | 58.349  | 137023 | 2 | 726.83  | 1.85   |
| [P0A7K0]RL11_SALTY 50S ribosomal protein L11 | 3  |                                        | TPPAAVLLKK                        | 72  | 10 | 4  | 34.62  | y6y7y8y10                                                | 1037.66 | 45.506  | 37793  | 2 | 519.34  | -8.59  |
| [P0A7K0]RL11_SALTY 50S ribosomal protein L11 | 4  |                                        | TPPAAVLLK                         | 72  | 9  | 6  | 55.72  | b3b6°b6y4y5y7                                            | 909.56  | 55.248  | 140906 | 2 | 455.28  | -15.84 |
| [P0A7K0]RL11_SALTY 50S ribosomal protein L11 | 5  |                                        | SFTFVTK                           | 65  | 7  | 4  | 37.9   | y4y5°y5y6                                                | 829.44  | 54.713  | 89833  | 2 | 415.22  | -10.30 |
| [P0A7K0]RL11_SALTY 50S ribosomal protein L11 | 6  |                                        | SMGLVVED                          | 134 | 8  | 3  | 33.63  | b6y3y5                                                   | 849.39  | 59.143  | 69104  | 1 | 849.39  | -19.69 |
| [P0A7K0]RL11_SALTY 50S ribosomal protein L11 | 7  |                                        | AFNAKTDSIEK                       | 40  | 11 | 9  | 51.94  | b4b6°b6b7°b7b10°b10y10°y10                               | 1223.61 | 65.354  | 12035  | 2 | 612.31  | -10.38 |
| [P0A7K0]RL11_SALTY 50S ribosomal protein L11 | 8  |                                        | AQLQEIAQTKAADMTGADIEAMT R         | 103 | 24 | 4  | 11.71  | b8*b8y5y10                                               | 2563.28 | 106.170 | 6704   | 3 | 855.10  | 10.67  |
| [P0A7K0]RL11_SALTY 50S ribosomal protein L11 | 9  | Carbamidomethyl+C(29) ;Oxidation+M(26) | LQVAAGMANPPVGPALGQQGVNI MEFCCK    | 10  | 30 | 3  | 21.54  | b15y7y8                                                  | 3097.52 | 132.250 | 1675   | 3 | 1033.18 | -2.60  |
| [P0A7K0]RL11_SALTY 50S ribosomal protein L11 | 10 |                                        | PAAVLLKK                          | 74  | 8  | 1  | 7.8    | b3                                                       | 839.56  | 45.513  | 14665  | 2 | 420.29  | -9.96  |
| [P0A7K0]RL11_SALTY 50S ribosomal protein L11 | 11 |                                        | QLQEIAQTK                         | 104 | 9  | 1  | 7.8    | b6                                                       | 1058.57 | 40.037  | 6079   | 2 | 529.79  | -14.53 |
| [P66038]RISB_SALTY 6                         | 1  |                                        | IGQVKDDNITVVWVPGAYELPLA TEALAK    | 40  | 29 | 20 | 120.55 | b3b8b9b10°b10b11°b11b12b13b14°b14b20y2y3y4y9y12y15y16y29 | 3110.69 | 99.127  | 143403 | 3 | 1037.57 | 4.24   |

|                                                                           |    |                       |                                         |     |    |    |        |                                                                                                                 |         |         |        |   |         |        |
|---------------------------------------------------------------------------|----|-----------------------|-----------------------------------------|-----|----|----|--------|-----------------------------------------------------------------------------------------------------------------|---------|---------|--------|---|---------|--------|
| P66038 RISB_SALTY 6                                                       | 2  |                       | FNQFINDSLLDGAVDALTR                     | 21  | 19 | 23 | 170.06 | b3b4b5b6*b6b11*b11*b11<br>b13b14y2y3y4y5y6y8y9y1<br>0y12y14°y14y15y19                                           | 2109.08 | 102.078 | 98602  | 2 | 1055.04 | 8.57   |
| P66038 RISB_SALTY 6                                                       | 3  |                       | GAEAAALTALEMINVLK                       | 136 | 16 | 11 | 104.7  | b4b5b6b7b9b11b12b13y1<br>4y5                                                                                    | 1643.90 | 103.744 | 42712  | 2 | 822.46  | 0.45   |
| P66038 RISB_SALTY 6                                                       | 4  |                       | VAITIAI                                 | 14  | 7  | 4  | 50.21  | y3y4y5y6                                                                                                        | 743.46  | 45.157  | 24174  | 2 | 372.24  | -18.31 |
| P66038 RISB_SALTY 6                                                       | 5  | Phohoryl STY(10)      | IGQVKDDNITVVWVPGAYELPLA<br>TEALAK       | 40  | 29 | 7  | 38.1   | b3b7b8b11°b11b12*b12                                                                                            | 3190.65 | 136.438 | 6913   | 3 | 1064.22 | 4.06   |
| Q8ZP65 TPX_SALTY Probable thiol<br>peroxidase                             | 1  |                       | SQTVHFQGNPVTVANVIPQAGSK                 | 1   | 23 | 34 | 202.42 | b2*b2b3b5°b5b7°b7b9°b9*<br>b9b10*b10b11*b11b12°b1<br>2b14b16b17y4y5y6*y6y7*<br>y7y8y9*y9y10*y10y11y12<br>y17y23 | 2379.24 | 65.371  | 213615 | 3 | 793.75  | 0.62   |
| Q8ZP65 TPX_SALTY Probable thiol<br>peroxidase                             | 2  |                       | AQAFTLVAK                               | 24  | 9  | 9  | 42.17  | b3y1y2y3y6°y6y7y9*y9                                                                                            | 948.54  | 54.184  | 176270 | 2 | 474.77  | -12.74 |
| Q8ZP65 TPX_SALTY Probable thiol<br>peroxidase                             | 3  | Carbamidomethyl+C(13) | VLNIFPSIDTGVCAASVR                      | 48  | 18 | 16 | 85.48  | b1b2b3b4b5°b5b10y2y3y6<br>y10y13°y13y14y15y18                                                                   | 1919.02 | 86.002  | 104870 | 2 | 960.01  | 5.09   |
| Q8ZP65 TPX_SALTY Probable thiol<br>peroxidase                             | 4  | Carbamidomethyl+C(2)  | FCGAEGLSNVITLSTLR                       | 93  | 17 | 9  | 52.43  | b2b3b7y4y5y6y13y15y17                                                                                           | 1837.96 | 86.887  | 103449 | 2 | 919.48  | 4.91   |
| Q8ZP65 TPX_SALTY Probable thiol<br>peroxidase                             | 5  |                       | DLSDVSLSQYAGK                           | 33  | 13 | 14 | 90.9   | b2b4b5b7b11b12y1y2y3y6<br>y7*y7y8y13                                                                            | 1382.69 | 60.114  | 57735  | 2 | 691.85  | 6.18   |
| Q8ZP65 TPX_SALTY Probable thiol<br>peroxidase                             | 6  | Carbamidomethyl+C(13) | VLNIFPSIDTGVCAASVRK                     | 48  | 19 | 5  | 29.22  | b2y8y11y14y15                                                                                                   | 2047.09 | 79.189  | 36961  | 3 | 683.03  | -6.56  |
| Q8ZP65 TPX_SALTY Probable thiol<br>peroxidase                             | 7  |                       | DLSDVSLSQYAGKR                          | 33  | 14 | 6  | 38.91  | y5y6y7*y7y9y14                                                                                                  | 1538.78 | 55.672  | 28918  | 2 | 769.89  | 0.48   |
| Q8ZP65 TPX_SALTY Probable thiol<br>peroxidase                             | 8  |                       | AQAFTLVAKDLSDVSLSQYAGK                  | 24  | 22 | 4  | 12.26  | b13y2y6y13                                                                                                      | 2312.23 | 84.448  | 13493  | 3 | 771.41  | 6.34   |
| Q8ZP65 TPX_SALTY Probable thiol<br>peroxidase                             | 9  |                       | NYGVEIVDGPLK                            | 116 | 12 | 5  | 33.15  | b3b11y8y9y12                                                                                                    | 1303.69 | 36.640  | 7898   | 2 | 652.35  | 2.06   |
| Q8ZP65 TPX_SALTY Probable thiol<br>peroxidase                             | 10 |                       | AVIVLDENDNVIFSQLVDEITHEPD<br>YDAALNVLK  | 133 | 34 | 3  | 10.91  | b3b8y11                                                                                                         | 3811.89 | 125.618 | 2910   | 4 | 953.73  | -11.08 |
| Q8ZP65 TPX_SALTY Probable thiol<br>peroxidase                             | 11 |                       | AVIVLDENDNVIFSQLVDEITHEPD<br>YDAALNVLKA | 133 | 35 | 30 | 220.64 | b3b4b5b6b7b10°b10b11*b<br>11b14°b14y3y4y5y6y7y8y1<br>1y12y13°y13*y13y18y19y2<br>0y22y24y28y30y31                | 3882.97 | 120.748 | 182646 | 3 | 1294.99 | 0.06   |
| Q8ZP65 TPX_SALTY Probable thiol<br>peroxidase                             | 12 |                       | DLSDVSLSQYAGKR                          | 33  | 14 | 9  | 52.06  | b3b6b10°b10°b10b13*b13<br>y3y7                                                                                  | 1538.80 | 64.483  | 4569   | 3 | 513.60  | 10.95  |
| Q8ZP65 TPX_SALTY Probable thiol<br>peroxidase                             | 13 | Phohoryl STY(13)      | MSQTVHFQGNPVTVANVIPQAGS<br>K            | 0   | 24 | 4  | 11.71  | b4b12°b12y12                                                                                                    | 2590.21 | 87.402  | 55567  | 3 | 864.08  | -10.65 |
| Q8ZP65 TPX_SALTY Probable thiol<br>peroxidase                             | 14 |                       | LSDVSLSQYAGKR                           | 34  | 13 | 0  | 4.47   |                                                                                                                 | 1423.77 | 55.725  | 3307   | 3 | 475.26  | 13.03  |
| P0A283 PTGA_SALTY Glucose-ecific<br>phohotransferase enzyme IIA component | 1  |                       | STLTPVVISNMDEIKELIK                     | 133 | 19 | 21 | 118.14 | b2°b2b3°b3b4°b4y2y3y4°y<br>4y5y11*y11y12°y12*y12y1<br>3y15y16y17y19                                             | 2130.16 | 93.430  | 311782 | 3 | 710.73  | -5.50  |
| P0A283 PTGA_SALTY Glucose-ecific<br>phohotransferase enzyme IIA component | 2  |                       | VGDPVIEFDLPLEEK                         | 115 | 16 | 23 | 166.21 | b2b3b4b5b6b7b8°b8b11b1<br>6y2°y2y3°y3y4y6y8y9y10°<br>y10y11y13y16                                               | 1812.98 | 100.299 | 166931 | 2 | 906.99  | 7.14   |
| P0A283 PTGA_SALTY Glucose-ecific<br>phohotransferase enzyme IIA component | 3  |                       | MVAPVDGTIGK                             | 59  | 11 | 15 | 115.22 | b1b2b3b8b9y2y3y5y6y7°y<br>7y8y9y10y11                                                                           | 1087.57 | 47.144  | 144195 | 2 | 544.29  | -10.78 |
| P0A283 PTGA_SALTY Glucose-ecific<br>phohotransferase enzyme IIA component | 4  |                       | IVGDGIAIKPTGNK                          | 45  | 14 | 11 | 100.73 | b5b7y3y4y5°y5°y5y6y8y10<br>y12                                                                                  | 1382.77 | 44.475  | 172606 | 3 | 461.59  | -21.63 |

|                                                                        |    |                       |                             |     |    |    |        |                                              |         |         |        |   |         |        |
|------------------------------------------------------------------------|----|-----------------------|-----------------------------|-----|----|----|--------|----------------------------------------------|---------|---------|--------|---|---------|--------|
| P0A283 PTGA_SALTY Glucose-ecific phohotransferase enzyme IIA component | 5  |                       | STLTPVVISNMDEIK             | 133 | 15 | 10 | 68.13  | b3°b3b4b6y3y4y7y8°y8y11                      | 1646.89 | 73.949  | 9023   | 2 | 823.95  | 12.68  |
| P0A283 PTGA_SALTY Glucose-ecific phohotransferase enzyme IIA component | 6  |                       | GEGFK                       | 100 | 5  | 3  | 24.61  | b3b4°b4                                      | 537.27  | 64.410  | 3962   | 1 | 537.27  | 8.75   |
| P0A283 PTGA_SALTY Glucose-ecific phohotransferase enzyme IIA component | 7  |                       | VKVGDPVIEFDLPLLEEK          | 113 | 18 | 9  | 37.69  | b5°b5b11°b11b12y3°y3y6y10                    | 2040.12 | 96.330  | 104501 | 3 | 680.71  | -5.15  |
| P0A283 PTGA_SALTY Glucose-ecific phohotransferase enzyme IIA component | 8  |                       | SLVSDDKK                    | 8   | 8  | 3  | 30.62  | b5b6y5                                       | 891.48  | 64.426  | 1864   | 2 | 446.24  | 1.92   |
| P0A283 PTGA_SALTY Glucose-ecific phohotransferase enzyme IIA component | 9  |                       | PVDGTIGK                    | 62  | 8  | 5  | 47.42  | b4b5b6°b6b7                                  | 786.42  | 47.158  | 2772   | 1 | 786.42  | -14.67 |
| P64052 EFTS_SALTY Elongation factor Ts                                 | 1  |                       | VASLEGDVLGSYQHGAR           | 134 | 17 | 18 | 152.48 | b1b8b9°b9y1y3y4y5y6y7y8°y8y10y11y12y13y16y17 | 1758.86 | 59.919  | 231229 | 3 | 586.96  | -9.09  |
| P64052 EFTS_SALTY Elongation factor Ts                                 | 2  |                       | ITDVEVLK                    | 104 | 8  | 9  | 72.3   | b2b3b4y2y4y5y6y7y8                           | 916.52  | 49.560  | 145514 | 2 | 458.77  | -10.99 |
| P64052 EFTS_SALTY Elongation factor Ts                                 | 3  |                       | AEITASLVK                   | 1   | 9  | 7  | 69.79  | b3y3y4y5y6y7y9                               | 931.54  | 49.635  | 138602 | 2 | 466.27  | -10.29 |
| P64052 EFTS_SALTY Elongation factor Ts                                 | 4  |                       | IGENINIR                    | 125 | 8  | 10 | 63.01  | y2y3°y3y4y5y6y7°y7°y7y8                      | 928.51  | 45.605  | 90423  | 2 | 464.76  | -12.88 |
| P64052 EFTS_SALTY Elongation factor Ts                                 | 5  | Carbamidomethyl+C(8)  | TGAGMMDCKK                  | 15  | 10 | 5  | 48.69  | y3y4y5y7y10                                  | 1098.48 | 22.046  | 41601  | 2 | 549.74  | 2.44   |
| P64052 EFTS_SALTY Elongation factor Ts                                 | 6  |                       | AGNVAADGVIK                 | 52  | 11 | 6  | 33.62  | b9y2y4y6y7y11                                | 1014.55 | 37.822  | 39511  | 2 | 507.78  | -11.31 |
| P64052 EFTS_SALTY Elongation factor Ts                                 | 7  |                       | EYQVQLDIAMQSGKPKEIAEK       | 193 | 21 | 4  | 12.6   | b3b6°b6y10                                   | 2405.24 | 86.368  | 18490  | 3 | 802.42  | 0.61   |
| P64052 EFTS_SALTY Elongation factor Ts                                 | 8  |                       | ALTEANGDIELAIENMRK          | 25  | 18 | 4  | 22.95  | y3y5y6y18                                    | 1988.02 | 67.735  | 17574  | 2 | 994.52  | 6.63   |
| P64052 EFTS_SALTY Elongation factor Ts                                 | 9  |                       | ALTEANGDIELAIENMR           | 25  | 17 | 4  | 24.84  | b5y4y6y7                                     | 1859.94 | 81.608  | 11992  | 2 | 930.48  | 14.90  |
| P64052 EFTS_SALTY Elongation factor Ts                                 | 10 |                       | FTGEVSLTGQPFVMEPSK          | 222 | 18 | 5  | 36.77  | b7b8y5y7y8                                   | 1953.96 | 68.298  | 3815   | 3 | 651.99  | -2.00  |
| P64052 EFTS_SALTY Elongation factor Ts                                 | 11 |                       | VETDFAAEVAAMSK              | 267 | 14 | 4  | 17.37  | b6b14y3y12                                   | 1468.70 | 107.771 | 2346   | 2 | 734.85  | -1.16  |
| P64052 EFTS_SALTY Elongation factor Ts                                 | 12 |                       | IGVLVAAK                    | 151 | 8  | 6  | 72.3   | b3b4y3y4y5y7                                 | 770.50  | 48.162  | 86876  | 2 | 385.75  | -21.70 |
| P64052 EFTS_SALTY Elongation factor Ts                                 | 13 |                       | QLAMHVAASKPEFVKPEDVSADV VEK | 167 | 26 | 10 | 53.12  | b5b6b9°b9b25y7y8°y8y11y12                    | 2824.50 | 136.380 | 15574  | 3 | 942.17  | 17.63  |
| P64052 EFTS_SALTY Elongation factor Ts                                 | 14 | Carbamidomethyl+C(13) | IDGNVAFILEVNCQTDFVAK        | 65  | 20 | 6  | 27.44  | b4b10y9y13°y13y14                            | 2253.16 | 107.932 | 4621   | 2 | 1127.08 | 17.99  |
| P64052 EFTS_SALTY Elongation factor Ts                                 | 15 |                       | KAGNVAADGVIK                | 51  | 12 | 3  | 27.38  | y7y10y11                                     | 1142.64 | 33.088  | 64821  | 2 | 571.82  | -9.83  |
| P64052 EFTS_SALTY Elongation factor Ts                                 | 16 |                       | DAGFQAFADKVLDAAVAGK         | 85  | 19 | 6  | 28.34  | b5b13b14°b14y3y7                             | 1893.96 | 98.989  | 58747  | 2 | 947.48  | -5.93  |
| P64052 EFTS_SALTY Elongation factor Ts                                 | 17 |                       | ALTEANGDIELAIENMRK          | 25  | 18 | 3  | 22.95  | y4y5y14                                      | 1988.00 | 75.155  | 48294  | 3 | 663.34  | -4.18  |
| P64052 EFTS_SALTY Elongation factor Ts                                 | 18 |                       | FEVGEGIEK VETDFAAEVAAMSK    | 258 | 23 | 9  | 40.71  | b4b7°b7b9b14b17y5y9°y9                       | 2457.18 | 107.949 | 29733  | 3 | 819.73  | -1.79  |
| P64052 EFTS_SALTY Elongation factor Ts                                 | 19 |                       | EHNADVTGFIRFEVGEGIEK        | 247 | 20 | 5  | 27.44  | b9b10b15y8y19                                | 2247.08 | 87.344  | 18154  | 3 | 749.70  | -12.28 |
| P64052 EFTS_SALTY Elongation factor Ts                                 | 20 |                       | KFTGEVSLTGQPFVMEPSK         | 221 | 19 | 12 | 68.66  | b11y4y5y7y8y9°y9°y9y10°y10y12°y12            | 2082.06 | 65.406  | 9436   | 2 | 1041.53 | -0.70  |
| P64052 EFTS_SALTY Elongation factor Ts                                 | 21 | Oxidation+M(16)       | ALTEANGDIELAIENMR           | 25  | 17 | 6  | 30.53  | b5°b5b15y6y7y11                              | 1875.93 | 96.346  | 2891   | 2 | 938.47  | 10.61  |

|                                               |    |                      |                                    |     |    |    |        |                                                          |         |         |        |   |         |        |
|-----------------------------------------------|----|----------------------|------------------------------------|-----|----|----|--------|----------------------------------------------------------|---------|---------|--------|---|---------|--------|
| P64052 EFTS_SALTY Elongation factor Ts        | 22 | Oxidation+M(14)      | FTGEVSLTGQPFVMEPSK                 | 222 | 18 | 6  | 34.09  | b10b11°b11y11y12°y12                                     | 1969.95 | 120.757 | 1593   | 2 | 985.48  | -6.01  |
| P64052 EFTS_SALTY Elongation factor Ts        | 23 |                      | ITASLVK                            | 3   | 7  | 0  | 1.99   |                                                          | 731.46  | 49.644  | 15514  | 1 | 731.46  | -5.34  |
| P64052 EFTS_SALTY Elongation factor Ts        | 24 | Carbamidomethyl+C(7) | GAGMMDCKK                          | 16  | 9  | 0  | 2.48   |                                                          | 997.42  | 22.054  | 11980  | 2 | 499.22  | -2.02  |
| P64052 EFTS_SALTY Elongation factor Ts        | 25 |                      | VASLEGDVLGS                        | 134 | 11 | 0  | 5.96   |                                                          | 1046.54 | 59.928  | 7230   | 2 | 523.78  | 7.82   |
| P64052 EFTS_SALTY Elongation factor Ts        | 26 |                      | TDVEVLK                            | 105 | 7  | 4  | 38.4   | b3b4°b4b5                                                | 803.44  | 49.553  | 6397   | 1 | 803.44  | -9.12  |
| P64052 EFTS_SALTY Elongation factor Ts        | 27 |                      | SLEGDVLGSYQHGAR                    | 136 | 15 | 3  | 22.08  | b3b6b10                                                  | 1588.79 | 59.971  | 6320   | 2 | 794.90  | 9.68   |
| P00499 HIS1_SALTY ATP phohoribosyltransferase | 1  |                      | LSLATPVDEAWDGPAALDGKR              | 105 | 21 | 21 | 145.21 | b2°b2b3°b3b14y1y3y4y5y7y8y9y10y11°y11y12y16y17y18°y18y21 | 2182.11 | 76.891  | 100038 | 3 | 728.04  | -0.78  |
| P00499 HIS1_SALTY ATP phohoribosyltransferase | 2  |                      | LIAMAENMPIDILR                     | 38  | 14 | 15 | 117.26 | b3b5b6b8y1y2y3y6y8*y8y9y10y11y12y14                      | 1599.87 | 91.310  | 96732  | 2 | 800.44  | 5.04   |
| P00499 HIS1_SALTY ATP phohoribosyltransferase | 3  |                      | IQGVIQAR                           | 216 | 8  | 8  | 50.7   | b2y1y4y5y6y7*y7y8                                        | 884.52  | 36.742  | 51101  | 2 | 442.76  | -11.59 |
| P00499 HIS1_SALTY ATP phohoribosyltransferase | 4  |                      | LEEVIALLPGAERPTILPLAGEQQR          | 237 | 25 | 9  | 37.87  | b2°b2b3b4y5y6*y6y17y21                                   | 2713.51 | 90.749  | 29516  | 3 | 905.18  | -5.13  |
| P00499 HIS1_SALTY ATP phohoribosyltransferase | 5  |                      | LSLATPVDEAWDGPAALDGK               | 105 | 20 | 9  | 25.61  | b1b9°b9b12y2y10°y10y11°y11                               | 2026.02 | 63.688  | 3592   | 2 | 1013.51 | 2.83   |
| P00499 HIS1_SALTY ATP phohoribosyltransferase | 6  |                      | ELLAR                              | 22  | 5  | 2  | 24.61  | b3b4                                                     | 601.36  | 29.353  | 95943  | 1 | 601.36  | -7.10  |
| P00499 HIS1_SALTY ATP phohoribosyltransferase | 7  |                      | LDNTR                              | 1   | 5  | 2  | 24.61  | b4y4                                                     | 618.31  | 81.549  | 15838  | 1 | 618.31  | -10.76 |
| P00499 HIS1_SALTY ATP phohoribosyltransferase | 8  |                      | YLTLR                              | 92  | 5  | 1  | 12.3   | y4                                                       | 665.39  | 45.314  | 8350   | 1 | 665.39  | -9.08  |
| P00499 HIS1_SALTY ATP phohoribosyltransferase | 9  | Carbamidomethyl+C(8) | AGLADAICDLVSTGATLEANGLR            | 160 | 23 | 17 | 75.21  | b3b6°b6b7b8°b8b9°b9b13°b13b15y6°y6*y6y12y13*y13          | 2288.11 | 65.341  | 5942   | 3 | 763.37  | -20.27 |
| P00499 HIS1_SALTY ATP phohoribosyltransferase | 10 |                      | YLDQK                              | 137 | 5  | 1  | 12.3   | y3                                                       | 666.35  | 49.781  | 4600   | 1 | 666.35  | 8.52   |
| P00499 HIS1_SALTY ATP phohoribosyltransferase | 11 |                      | DDDIPGLVMDGVVDLGIIGENVLEEELLNR     | 54  | 30 | 4  | 10.94  | b14b16°b16y4                                             | 3251.59 | 98.089  | 4539   | 4 | 813.65  | -13.67 |
| P00499 HIS1_SALTY ATP phohoribosyltransferase | 12 |                      | VAMHMOVSETLFWETMEK                 | 262 | 18 | 4  | 22.36  | b8y5y8y10                                                | 2156.00 | 84.581  | 2614   | 3 | 719.34  | 6.23   |
| P00499 HIS1_SALTY ATP phohoribosyltransferase | 13 |                      | ALGASSILVLPIEK                     | 282 | 14 | 10 | 85.96  | b5b7°b7b10y5y6y7y9y10y12                                 | 1410.83 | 85.292  | 2406   | 1 | 1410.83 | -18.43 |
| P00499 HIS1_SALTY ATP phohoribosyltransferase | 14 |                      | YIMMHAPSERLEEVIALLPGAERTILPLAGEQQR | 227 | 35 | 4  | 23.02  | y3y5y6°y6                                                | 3929.05 | 97.876  | 22405  | 5 | 786.62  | -7.02  |
| P00499 HIS1_SALTY ATP phohoribosyltransferase | 15 | Carbamidomethyl+C(7) | GVSFKSCLLNGSVEVAPR                 | 142 | 18 | 4  | 22.36  | b7b9b16y5                                                | 1920.00 | 60.734  | 21453  | 3 | 640.67  | 0.64   |
| P00499 HIS1_SALTY ATP phohoribosyltransferase | 16 | Carbamidomethyl+C(6) | LDFGGCRLSLATPVDEAWDGPAALDGK        | 98  | 27 | 5  | 24.38  | b4b9b12b13y15                                            | 2831.37 | 97.986  | 8177   | 3 | 944.46  | 1.81   |
| P66593 RS6_SALTY 30S ribosomal protein S6     | 1  |                      | YSAAITGAEGK                        | 24  | 11 | 18 | 133.55 | b1b2°b2b3°b3b4b6b9y2y3y4y5y6°y6y7y9y10y11                | 1067.53 | 34.447  | 234096 | 2 | 534.27  | -10.75 |
| P66593 RS6_SALTY 30S ribosomal protein S6     | 2  |                      | FNDAVIR                            | 79  | 7  | 9  | 59.5   | b2b3y1y3y4y5y6*y6y7                                      | 834.43  | 43.147  | 169574 | 2 | 417.72  | -14.34 |
| P66593 RS6_SALTY 30S ribosomal protein S6     | 3  |                      | AHYVLMNVEAPQVEIDELETTFR            | 56  | 23 | 10 | 51.47  | b7b11y2y4y5y6y8y10y14y23                                 | 2704.33 | 111.555 | 107243 | 3 | 902.12  | 0.99   |
| P66593 RS6_SALTY 30S ribosomal protein S6     | 4  |                      | HAVTEAMVK                          | 93  | 11 | 8  | 59.02  | b2b7b10y4y8y9y10y11                                      | 1169.59 | 31.943  | 83034  | 2 | 585.30  | -5.74  |
| P66593 RS6_SALTY 30S ribosomal protein S6     | 5  |                      | LEDWGR                             | 38  | 6  | 2  | 25.1   | b3y5                                                     | 775.38  | 39.528  | 5802   | 1 | 775.38  | 13.85  |



|                                             |    |                      |                          |     |    |    |        |                                                                 |         |         |        |   |         |        |
|---------------------------------------------|----|----------------------|--------------------------|-----|----|----|--------|-----------------------------------------------------------------|---------|---------|--------|---|---------|--------|
| P66593 RS6_SALTY 30S ribosomal protein S6   | 6  |                      | HYEIVFMVHPDQSEQVPGMIER   | 2   | 22 | 5  | 27.65  | b6y4y8y11y16                                                    | 2641.24 | 79.290  | 3076   | 3 | 881.09  | -3.70  |
| P66593 RS6_SALTY 30S ribosomal protein S6   | 7  |                      | RQLAYPINK                | 44  | 9  | 4  | 42.17  | b5b7b8y4                                                        | 1102.63 | 38.706  | 53044  | 2 | 551.82  | -4.10  |
| P66593 RS6_SALTY 30S ribosomal protein S6   | 8  |                      | YSAAITGAEGKIHR           | 24  | 14 | 3  | 25.94  | b3b6b8                                                          | 1473.76 | 96.226  | 9957   | 2 | 737.39  | -12.18 |
| P66593 RS6_SALTY 30S ribosomal protein S6   | 9  |                      | RHYEIVFMVHPDQSEQVPGMIER  | 1   | 23 | 6  | 34.35  | b3b4y5y6y8°y8                                                   | 2797.39 | 106.320 | 1714   | 3 | 933.13  | 11.69  |
| P66593 RS6_SALTY 30S ribosomal protein S6   | 10 | Phohoryl STY(13)     | HYEIVFMVHPDQSEQVPGMIER   | 2   | 22 | 6  | 50.01  | b6b11y5y6y7y8                                                   | 2721.17 | 126.500 | 2157   | 2 | 1361.09 | -13.82 |
| P66593 RS6_SALTY 30S ribosomal protein S6   | 11 | Oxidation+M(9)       | HAVTEAMVK                | 93  | 11 | 6  | 38.39  | b3b5b8°b8y9°y9                                                  | 1185.61 | 40.005  | 2949   | 2 | 593.31  | 10.61  |
| P66313 RL6_SALTY 50S ribosomal protein L6   | 1  |                      | APVVVPAGVDVK             | 6   | 12 | 17 | 128.02 | b2b3b4b5b10°b10y1y2y3y4y5y7°y7y8y9y10y12                        | 1150.67 | 54.238  | 164845 | 2 | 575.84  | -7.85  |
| P66313 RL6_SALTY 50S ribosomal protein L6   | 2  |                      | INGQVITIK                | 18  | 9  | 12 | 74.05  | b2°b2b3b5°b5y3y4y7y8*y8y9*y9                                    | 985.60  | 49.383  | 127740 | 2 | 493.30  | -8.30  |
| P66313 RL6_SALTY 50S ribosomal protein L6   | 3  |                      | TLNDAVEVK                | 35  | 9  | 19 | 109.71 | b1°b1b2°b2b3b4°b4b8y1y2y3°y3y4y5y6y7y8y9*y9                     | 988.52  | 39.466  | 119004 | 2 | 494.76  | -12.97 |
| P66313 RL6_SALTY 50S ribosomal protein L6   | 4  |                      | DGYADGWAQAGTAR           | 55  | 14 | 5  | 22.81  | b3y2y10°y10y11                                                  | 1438.64 | 50.786  | 113893 | 2 | 719.83  | 6.02   |
| P66313 RL6_SALTY 50S ribosomal protein L6   | 5  |                      | YADEVVR                  | 163 | 7  | 5  | 37.9   | y3y4°y4y5y7                                                     | 851.42  | 31.662  | 107552 | 2 | 426.21  | -11.83 |
| P66313 RL6_SALTY 50S ribosomal protein L6   | 6  |                      | ALLNSMVIGVTEGFTKK        | 69  | 17 | 5  | 23.59  | b2b3y7y9y15                                                     | 1807.99 | 89.405  | 82820  | 3 | 603.33  | -7.49  |
| P66313 RL6_SALTY 50S ribosomal protein L6   | 7  |                      | ALLNSMVIGVTEGFTK         | 69  | 16 | 6  | 37.19  | y2y5y9y10y11y16                                                 | 1679.91 | 95.264  | 76512  | 2 | 840.46  | 4.14   |
| P66313 RL6_SALTY 50S ribosomal protein L6   | 8  |                      | LQLVGVGYS                | 86  | 9  | 6  | 35.89  | b2°b2y2y3y5y6                                                   | 1004.58 | 60.648  | 24211  | 2 | 502.79  | -6.99  |
| P66313 RL6_SALTY 50S ribosomal protein L6   | 9  |                      | QVIGQVAADLR              | 138 | 11 | 4  | 47.42  | y4y6y8y9                                                        | 1169.65 | 58.225  | 28143  | 2 | 585.33  | -9.71  |
| P66313 RL6_SALTY 50S ribosomal protein L6   | 10 |                      | RPEPYK                   | 152 | 6  | 2  | 25.1   | b3y4                                                            | 789.42  | 52.737  | 14931  | 2 | 395.21  | -11.75 |
| P66313 RL6_SALTY 50S ribosomal protein L6   | 11 |                      | GADKQVIGQVAADLR          | 134 | 15 | 4  | 26.7   | b4b6b13y4                                                       | 1540.83 | 60.079  | 21099  | 3 | 514.28  | -11.65 |
| P66313 RL6_SALTY 50S ribosomal protein L6   | 12 |                      | TLNDAVEVKHADNALTGPR      | 35  | 20 | 6  | 28.47  | b6°b6°b6b8b13b14                                                | 2168.09 | 109.480 | 2136   | 3 | 723.37  | -8.78  |
| P66313 RL6_SALTY 50S ribosomal protein L6   | 13 |                      | INGQVITIK                | 18  | 9  | 0  | 1.99   |                                                                 | 968.58  | 49.319  | 26680  | 2 | 484.79  | 6.62   |
| P0A2B1 RS20_SALTY 30S ribosomal protein S20 | 1  |                      | AFNEMQPIVDR              | 49  | 11 | 18 | 108.94 | b2b3b4b9b10°b10y1y2y3y5y6*y6y8°y8y9*y9y11*y11                   | 1319.63 | 58.013  | 175940 | 2 | 660.32  | -5.74  |
| P0A2B1 RS20_SALTY 30S ribosomal protein S20 | 2  |                      | ANLTAQINK                | 76  | 9  | 8  | 35.89  | b2°b2y2y5*y5y6y7y9                                              | 972.54  | 36.452  | 27249  | 2 | 486.77  | -7.15  |
| P0A2B1 RS20_SALTY 30S ribosomal protein S20 | 3  |                      | AFNEMQPIVDRQAAK          | 49  | 15 | 5  | 29.07  | b9°b9b10y6y13                                                   | 1717.86 | 113.337 | 3072   | 2 | 859.43  | -7.96  |
| Q8ZKP7 TPIS_SALTY Triosephohate isomerase   | 1  | Carbamidomethyl+C(8) | ELTGVAGCDVAIAPPEMYIDLAKR | 28  | 24 | 9  | 33.1   | b2b20y4y5y10y12°y12y18y24                                       | 2589.31 | 83.595  | 67704  | 3 | 863.78  | 3.39   |
| Q8ZKP7 TPIS_SALTY Triosephohate isomerase   | 2  |                      | SATPAQAQAVHK             | 176 | 12 | 20 | 114.75 | b2b3b5°b5y1y2y3y4y5*y5y6*y6y7*y7y8y9*y9y10°y10y12               | 1208.63 | 19.672  | 58656  | 2 | 604.82  | -5.15  |
| Q8ZKP7 TPIS_SALTY Triosephohate isomerase   | 3  | Carbamidomethyl+C(8) | ELTGVAGCDVAIAPPEMYIDLAK  | 28  | 23 | 5  | 11.96  | b1b12y3y10y23                                                   | 2433.22 | 88.936  | 29717  | 2 | 1217.11 | 5.92   |
| Q8ZKP7 TPIS_SALTY Triosephohate isomerase   | 4  |                      | TQGAAAFEGAVIAYEPVWAIGTGK | 152 | 24 | 24 | 112.32 | b1°b1b2b3°b3b5°b5°b5b8b9b11b12°b12b14b15y1y2y4y7y10y11y12y13y24 | 2407.24 | 94.413  | 21289  | 2 | 1204.12 | 3.35   |

|                                                                    |    |                                             |                                   |     |    |    |        |                                                                   |         |         |        |   |         |        |
|--------------------------------------------------------------------|----|---------------------------------------------|-----------------------------------|-----|----|----|--------|-------------------------------------------------------------------|---------|---------|--------|---|---------|--------|
| Q8ZKP7 TPIS_SALTY Triosephohate isomerase                          | 5  |                                             | AAAGSHIMLGAQNVDLNLSGAFT GETSAEMLK | 52  | 32 | 7  | 20.53  | b6b14b15°b15y2y14y32                                              | 3204.55 | 102.107 | 4098   | 3 | 1068.86 | -4.11  |
| Q8ZKP7 TPIS_SALTY Triosephohate isomerase                          | 6  |                                             | QIDAVLK                           | 145 | 7  | 3  | 37.9   | y3y4y5                                                            | 786.46  | 43.769  | 54729  | 2 | 393.73  | -17.15 |
| Q8ZKP7 TPIS_SALTY Triosephohate isomerase                          | 7  |                                             | ADAFIVK                           | 238 | 9  | 6  | 42.17  | b4°b4b5°b5b8y5                                                    | 933.53  | 63.698  | 19260  | 2 | 467.27  | -15.89 |
| Q8ZKP7 TPIS_SALTY Triosephohate isomerase                          | 8  | Carbamidomethyl+C(9); Carbamidomethyl+C(26) | EQGLTPVLCIGETEAEENEAGKTEE VCAR    | 117 | 28 | 23 | 209.02 | b5°b5y3y4y5°y5y6y7y10y11y12*y12y13y14y16y18y19y20y21y23*y23y24y26 | 3090.45 | 73.125  | 171153 | 3 | 1030.82 | 3.16   |
| Q8ZKP7 TPIS_SALTY Triosephohate isomerase                          | 9  |                                             | MRHPLVMGNWK                       | 0   | 11 | 3  | 22.11  | b3b5y7                                                            | 1368.68 | 57.324  | 9813   | 3 | 456.90  | -13.38 |
| Q8ZKP7 TPIS_SALTY Triosephohate isomerase                          | 10 | Oxidation+M(8)                              | AAAGSHIMLGAQNVDLNLSGAFT GETSAEMLK | 52  | 32 | 10 | 32.82  | b5°b5b7°b7b13°b13b26y6y7°y7                                       | 3220.57 | 136.443 | 7365   | 3 | 1074.20 | 3.71   |
| Q8ZKP7 TPIS_SALTY Triosephohate isomerase                          | 11 | Carbamidomethyl+C(8); Oxidation+M(17)       | ELTGVAGCDVAIAPPEMYIDLAKR          | 28  | 24 | 7  | 25.91  | b4°b4b5°b5b10b14y11                                               | 2605.31 | 105.184 | 1908   | 3 | 869.11  | 5.53   |
| Q8ZKP7 TPIS_SALTY Triosephohate isomerase                          | 12 |                                             | TPAQQAVHK                         | 178 | 10 | 7  | 57.21  | b4°b4b5°b5b7b8b9                                                  | 1050.56 | 19.672  | 23426  | 2 | 525.78  | -7.55  |
| Q8ZKP7 TPIS_SALTY Triosephohate isomerase                          | 13 |                                             | PAQAQAVHK                         | 179 | 9  | 11 | 74.29  | b3°b3b4°b4b5°b5b6°b6b7°b7b8                                       | 949.51  | 19.673  | 19960  | 2 | 475.26  | -7.78  |
| Q8ZKP7 TPIS_SALTY Triosephohate isomerase                          | 14 |                                             | VAIAPPEMYIDLAK                    | 37  | 14 | 1  | 8.69   | b4                                                                | 1530.84 | 88.902  | 10684  | 2 | 765.92  | 9.73   |
| O54297 RS4_SALTY 30S ribosomal protein S4                          | 1  |                                             | LSDYGVLQR                         | 47  | 9  | 11 | 71.04  | b3°b3b7y1y2y5y6y7y8*y8y9                                          | 1050.55 | 51.923  | 128423 | 2 | 525.78  | -6.39  |
| O54297 RS4_SALTY 30S ribosomal protein S4                          | 2  |                                             | VVNIASYQVNDVVSIR                  | 128 | 18 | 21 | 168.05 | b3b8b12b14°b14b15°b15b17°b17y1y3y4y5y8y9y10y11y12y13y14y18        | 1960.06 | 73.025  | 116775 | 2 | 980.53  | 3.36   |
| O54297 RS4_SALTY 30S ribosomal protein S4                          | 3  |                                             | LDNVVYR                           | 97  | 7  | 7  | 37.9   | b2y3y5y6°y6*y6y7                                                  | 878.46  | 38.884  | 58535  | 2 | 439.73  | -13.83 |
| O54297 RS4_SALTY 30S ribosomal protein S4                          | 4  |                                             | VVNIASYQVNDVVSIREK                | 128 | 20 | 7  | 42.02  | b2y5y10y11y12y16y20                                               | 2217.18 | 66.996  | 33280  | 3 | 739.73  | -4.40  |
| O54297 RS4_SALTY 30S ribosomal protein S4                          | 5  |                                             | IYGVLER                           | 63  | 7  | 3  | 34.89  | b3y5y6                                                            | 849.47  | 50.548  | 43901  | 2 | 425.24  | -16.53 |
| O54297 RS4_SALTY 30S ribosomal protein S4                          | 6  |                                             | AAELEAEQR                         | 156 | 9  | 8  | 60.49  | b3y3y4°y4y6°y6*y6y7                                               | 1000.54 | 44.250  | 11057  | 1 | 1000.54 | -2.87  |
| O54297 RS4_SALTY 30S ribosomal protein S4                          | 7  |                                             | GNTGENLLALLEGR                    | 83  | 14 | 3  | 17.37  | b5b7y3                                                            | 1456.78 | 72.505  | 9052   | 2 | 728.89  | 2.85   |
| O54297 RS4_SALTY 30S ribosomal protein S4                          | 8  |                                             | IEQAPGQHGAR                       | 33  | 11 | 3  | 33.87  | y6y7y8                                                            | 1163.57 | 16.230  | 5184   | 3 | 388.53  | -18.67 |
| O54297 RS4_SALTY 30S ribosomal protein S4                          | 9  |                                             | SDLSADINEHLIVELYSK                | 188 | 18 | 3  | 14.03  | b9b13y3                                                           | 2045.99 | 88.347  | 3573   | 2 | 1023.50 | -21.72 |
| O54297 RS4_SALTY 30S ribosomal protein S4                          | 10 |                                             | EKPTWLEVDAGKMEGTYK                | 165 | 18 | 4  | 22.36  | b10y5y8y13                                                        | 2082.03 | 65.994  | 70013  | 3 | 694.68  | 2.81   |
| O54297 RS4_SALTY 30S ribosomal protein S4                          | 11 |                                             | MARYLGPK                          | 0   | 8  | 3  | 38.4   | b4b6b7                                                            | 935.52  | 64.471  | 4484   | 2 | 468.26  | 8.29   |
| O54297 RS4_SALTY 30S ribosomal protein S4                          | 12 | Carbamidomethyl+C(1)                        | CKIEQAPGQHGAR                     | 31  | 13 | 9  | 54.57  | b4°b4b12y3y4y6°y6y7*y7                                            | 1451.74 | 100.343 | 2083   | 2 | 726.37  | 12.78  |
| O54297 RS4_SALTY 30S ribosomal protein S4                          | 13 | Phohoryl STY(13)                            | AAELEAEQREKPTWLEVDAGK             | 156 | 21 | 3  | 12.6   | b13y5y8                                                           | 2434.17 | 92.405  | 3710   | 4 | 609.30  | -10.93 |
| P0A1R2 HIS6_SALTY Imidazole glycerol phohate synthase subunit hisF | 1  | Carbamidomethyl+C(10)                       | VAEVIDIPFCVAGGIR                  | 68  | 16 | 9  | 76.87  | b2b3b12b13y8y9y10y11y12                                           | 1715.93 | 91.571  | 44441  | 2 | 858.47  | 6.54   |
| P0A1R2 HIS6_SALTY Imidazole glycerol phohate synthase subunit hisF | 2  |                                             | VTQWETLDWVQEVQQR                  | 153 | 16 | 19 | 124.83 | b1b2b3b11°b11b12b13y1y2y3y4y5y6°y6y8y9y11y12y16                   | 2045.03 | 85.198  | 40209  | 2 | 1023.02 | 9.61   |

|                                                                                                                  |    |                       |                                      |     |    |    |        |                                             |         |         |        |   |         |        |
|------------------------------------------------------------------------------------------------------------------|----|-----------------------|--------------------------------------|-----|----|----|--------|---------------------------------------------|---------|---------|--------|---|---------|--------|
| [P0A1R2]HIS6_SALTY Imidazole glycerol phohate synthase subunit hisF                                              | 3  |                       | NHEIIGDIVPLAK                        | 24  | 13 | 4  | 27.87  | b3*b3b6b8                                   | 1418.79 | 70.195  | 5865   | 2 | 709.90  | -8.86  |
| [P0A1R2]HIS6_SALTY Imidazole glycerol phohate synthase subunit hisF                                              | 4  |                       | GAGEIVLNMMNQDGVR                     | 169 | 16 | 3  | 21.96  | b13b14y10                                   | 1703.84 | 78.723  | 56168  | 2 | 852.42  | 12.25  |
| [P0A1R2]HIS6_SALTY Imidazole glycerol phohate synthase subunit hisF                                              | 5  |                       | VPLIASGGAGTMEHFLEAFR                 | 201 | 20 | 5  | 28.47  | y3y6°y6y12y13                               | 2103.06 | 66.043  | 21318  | 4 | 526.52  | -4.41  |
| [P0A1R2]HIS6_SALTY Imidazole glycerol phohate synthase subunit hisF                                              | 6  |                       | DADVDGALAASVFHK                      | 221 | 15 | 4  | 16.31  | b9b11°b11y7                                 | 1515.74 | 54.224  | 2847   | 2 | 758.38  | 0.72   |
| [P0A1R2]HIS6_SALTY Imidazole glycerol phohate synthase subunit hisF                                              | 7  |                       | ILSFGADKISINALADPTLITR               | 91  | 24 | 4  | 33.54  | b12b13y6y7                                  | 2513.39 | 85.351  | 70387  | 3 | 838.47  | -1.17  |
| [P0A1R2]HIS6_SALTY Imidazole glycerol phohate synthase subunit hisF                                              | 8  |                       | VTQWETLDWVQEVQQRGAGEIV<br>LNMMNQDGVR | 153 | 32 | 5  | 27.16  | b6b7y4y9y20                                 | 3729.86 | 115.838 | 2022   | 3 | 1243.96 | 11.98  |
| [P0A1R2]HIS6_SALTY Imidazole glycerol phohate synthase subunit hisF                                              | 9  | Oxidation+M()         | GAGEIVLNMMNQDGVR                     | 169 | 16 | 3  | 15.43  | b6b12y12                                    | 1719.81 | 72.590  | 6388   | 3 | 573.94  | -4.40  |
| [P0A251]AHPC_SALTY Alkyl hydroperoxide reductase subunit C                                                       | 1  |                       | YAMIGDPTGALTR                        | 93  | 13 | 10 | 86.17  | b2b3b4y3y7y8y9y10y11y13                     | 1365.68 | 63.775  | 55298  | 2 | 683.35  | 0.98   |
| [P0A251]AHPC_SALTY Alkyl hydroperoxide reductase subunit C                                                       | 2  |                       | ATFVVDPPQHIAIEVTAEIGIR               | 120 | 23 | 9  | 38.2   | b6b8y2y4y7°y7y8°y8y9                        | 2384.27 | 129.215 | 46780  | 3 | 795.43  | -4.40  |
| [P0A251]AHPC_SALTY Alkyl hydroperoxide reductase subunit C                                                       | 3  |                       | AWHSSSETIAK                          | 80  | 11 | 4  | 25.12  | b3y8y9y11                                   | 1216.58 | 31.174  | 32124  | 3 | 406.20  | -14.35 |
| [P0A251]AHPC_SALTY Alkyl hydroperoxide reductase subunit C                                                       | 4  |                       | NGEFIEVTEK                           | 17  | 10 | 3  | 24.62  | b6b8y5                                      | 1165.56 | 89.357  | 5893   | 2 | 583.29  | -8.69  |
| [P0A251]AHPC_SALTY Alkyl hydroperoxide reductase subunit C                                                       | 5  |                       | LGVDVYSVSTDTHFTHK                    | 63  | 17 | 4  | 14.67  | b1b3b10y10                                  | 1905.96 | 67.744  | 1997   | 2 | 953.48  | 13.83  |
| [P0A251]AHPC_SALTY Alkyl hydroperoxide reductase subunit C                                                       | 6  | Carbamidomethyl+C(13) | AAQYVAAHGPEVCPAK                     | 153 | 16 | 17 | 118.12 | b3b4b5°b5b8°b8b13y3y4y5y8°y8y9°y9y11°y11y12 | 1668.79 | 36.371  | 115032 | 3 | 556.93  | -16.53 |
| [P0A251]AHPC_SALTY Alkyl hydroperoxide reductase subunit C                                                       | 7  | Carbamidomethyl+C(15) | WSVFFFPADFTFVCPTLGDVA<br>DHYEELQK    | 32  | 31 | 5  | 12.58  | b8b11°b11y7y12                              | 3757.78 | 96.458  | 5217   | 5 | 752.36  | 15.53  |
| [P0A251]AHPC_SALTY Alkyl hydroperoxide reductase subunit C                                                       | 8  |                       | DASDLLR                              | 143 | 7  | 5  | 65.52  | b3b6y3y4y5                                  | 789.40  | 46.691  | 4210   | 1 | 789.40  | -17.63 |
| [P0A251]AHPC_SALTY Alkyl hydroperoxide reductase subunit C                                                       | 9  |                       | IKYAMIGDPTGALTR                      | 91  | 15 | 11 | 43.01  | b6b8°b8y8°y8y10°y10y13°y13y14°y14           | 1606.84 | 64.382  | 21001  | 3 | 536.29  | -12.84 |
| [P0A251]AHPC_SALTY Alkyl hydroperoxide reductase subunit C                                                       | 10 |                       | NGEFIEVTEKDTEGR                      | 17  | 15 | 4  | 24.39  | y6°y6y9y10                                  | 1723.83 | 66.094  | 14893  | 3 | 575.28  | 10.34  |
| [P0A251]AHPC_SALTY Alkyl hydroperoxide reductase subunit C                                                       | 11 |                       | EGEATLAPSLDLVGKI                     | 171 | 16 | 4  | 36.23  | b7b9b12b14                                  | 1612.86 | 77.349  | 7816   | 2 | 806.94  | -9.46  |
| [P0A251]AHPC_SALTY Alkyl hydroperoxide reductase subunit C                                                       | 12 | Carbamidomethyl+C(13) | AAQYVAAHGPEVCPAKWK                   | 153 | 18 | 3  | 21.43  | b7y9y10                                     | 1982.98 | 47.847  | 4939   | 3 | 661.67  | -3.02  |
| [P0A251]AHPC_SALTY Alkyl hydroperoxide reductase subunit C                                                       | 13 |                       | LGVDVYSVSTDTHFTHKAWHSSS<br>ETIAK     | 63  | 28 | 4  | 20.79  | b4y8y10y11                                  | 3103.53 | 133.377 | 2168   | 3 | 1035.18 | 5.74   |
| [P0A251]AHPC_SALTY Alkyl hydroperoxide reductase subunit C                                                       | 14 | Phohoryl STY(7)       | LGVDVYSVSTDTHFTHK                    | 63  | 17 | 4  | 20.37  | b6b9_H3PO4 b9y5y9                           | 1985.87 | 116.698 | 1605   | 2 | 993.44  | -9.34  |
| [P0A251]AHPC_SALTY Alkyl hydroperoxide reductase subunit C                                                       | 15 |                       | YAMIGDPTGALTR                        | 93  | 13 | 0  | 3.97   |                                             | 1347.67 | 63.704  | 3601   | 2 | 674.34  | 1.54   |
| [P10372]HIS4_SALTY 1-(5-phohoribosyl)-5-[(5-phohoribosylamino)methylideneamino]imidazole-4-carboxamide isomerase | 1  |                       | MIIPALDLIDGTVVR                      | 0   | 15 | 9  | 63.31  | b2b3y5y6y7y9y12y13y15                       | 1625.93 | 103.502 | 83177  | 2 | 813.47  | 2.70   |

|                                                                                                                  |    |                       |                                  |     |    |    |       |                                             |         |         |        |   |         |        |
|------------------------------------------------------------------------------------------------------------------|----|-----------------------|----------------------------------|-----|----|----|-------|---------------------------------------------|---------|---------|--------|---|---------|--------|
| [P10372]HIS4_SALTY 1-(5-phohoribosyl)-5-[(5-phohoribosylamino)methylideneamino]imidazole-4-carboxamide isomerase | 2  |                       | VVIGSTAVK                        | 98  | 9  | 5  | 35.89 | y2y3y6y7y9                                  | 873.53  | 38.404  | 17736  | 2 | 437.27  | -9.50  |
| [P10372]HIS4_SALTY 1-(5-phohoribosyl)-5-[(5-phohoribosylamino)methylideneamino]imidazole-4-carboxamide isomerase | 3  |                       | QVAVSGWQENSGVSLEQLVETYL<br>PVGLK | 138 | 28 | 15 | 67.43 | b3b7°b7*b7b8b11°b11b12<br>b13b14b17y1y2y3y5 | 3030.60 | 118.645 | 12860  | 3 | 1010.87 | 6.61   |
| [P10372]HIS4_SALTY 1-(5-phohoribosyl)-5-[(5-phohoribosylamino)methylideneamino]imidazole-4-carboxamide isomerase | 4  | Carbamidomethyl+C(9)  | FTVKEAICWQNV                     | 232 | 13 | 6  | 31.15 | b10y4*y4y10*y10y12                          | 1622.80 | 69.505  | 9360   | 3 | 541.61  | 0.60   |
| [P10372]HIS4_SALTY 1-(5-phohoribosyl)-5-[(5-phohoribosylamino)methylideneamino]imidazole-4-carboxamide isomerase | 5  |                       | YPQIAFQSSGGIGDIDDIAALR           | 193 | 22 | 6  | 27.65 | b6*b6b9b12°b12b14                           | 2307.19 | 87.124  | 6115   | 3 | 769.73  | 12.38  |
| [P10372]HIS4_SALTY 1-(5-phohoribosyl)-5-[(5-phohoribosylamino)methylideneamino]imidazole-4-carboxamide isomerase | 6  |                       | TEEDVAALLK                       | 83  | 10 | 3  | 34.62 | b7b8b9                                      | 1088.56 | 28.748  | 39898  | 2 | 544.78  | -21.08 |
| [P10372]HIS4_SALTY 1-(5-phohoribosyl)-5-[(5-phohoribosylamino)methylideneamino]imidazole-4-carboxamide isomerase | 7  |                       | GWFER                            | 113 | 5  | 1  | 12.3  | b3                                          | 694.32  | 51.968  | 17581  | 1 | 694.32  | -11.34 |
| [P10372]HIS4_SALTY 1-(5-phohoribosyl)-5-[(5-phohoribosylamino)methylideneamino]imidazole-4-carboxamide isomerase | 8  | Carbamidomethyl+C(16) | DGTLAGSNVSLYEVCAR                | 175 | 18 | 5  | 22.36 | b4b8°b8b10y3                                | 1940.91 | 67.288  | 10267  | 2 | 970.96  | 4.65   |
| [P10372]HIS4_SALTY 1-(5-phohoribosyl)-5-[(5-phohoribosylamino)methylideneamino]imidazole-4-carboxamide isomerase | 9  |                       | QIPLIK                           | 60  | 6  | 3  | 37.41 | b4b5y3                                      | 711.48  | 55.250  | 5334   | 1 | 711.48  | 3.60   |
| [P10372]HIS4_SALTY 1-(5-phohoribosyl)-5-[(5-phohoribosylamino)methylideneamino]imidazole-4-carboxamide isomerase | 10 |                       | IDEHGTK                          | 131 | 7  | 4  | 47.2  | b3b4b6y4                                    | 799.40  | 122.865 | 1501   | 1 | 799.40  | 5.80   |
| [Q7CPL6]RL18_SALTY 50S ribosomal protein L18                                                                     | 1  |                       | YTG NKDAAAAVGK                   | 63  | 13 | 10 | 49.8  | b2b5°b5b7b8b10y2y6y8y1<br>3                 | 1265.63 | 24.435  | 92456  | 3 | 422.55  | -14.18 |
| [Q7CPL6]RL18_SALTY 50S ribosomal protein L18                                                                     | 2  |                       | AIAEQLK                          | 56  | 7  | 7  | 47.2  | b2b4°b4y4y5y6y7                             | 772.45  | 33.241  | 46292  | 2 | 386.73  | -13.91 |
| [Q7CPL6]RL18_SALTY 50S ribosomal protein L18                                                                     | 3  |                       | GIKDVSFDR                        | 85  | 9  | 12 | 97.4  | b4°b4b5b8y2y3y4y5°y5y6y<br>7y9              | 1036.54 | 43.244  | 44355  | 2 | 518.77  | -2.00  |
| [Q7CPL6]RL18_SALTY 50S ribosomal protein L18                                                                     | 4  |                       | HIYAQVIAPNGSEVLVAASTVEK          | 33  | 23 | 9  | 47.61 | b1b3b4b5b12*b12b13y13y<br>23                | 2396.30 | 64.411  | 31973  | 3 | 799.44  | 6.42   |
| [Q7CPL6]RL18_SALTY 50S ribosomal protein L18                                                                     | 5  |                       | VQALADAAR                        | 102 | 9  | 7  | 69.79 | b3*b3y3y4y5y6y7                             | 914.49  | 32.580  | 209133 | 2 | 457.75  | -16.89 |
| [Q7CPL6]RL18_SALTY 50S ribosomal protein L18                                                                     | 6  |                       | EAGLQF                           | 111 | 6  | 4  | 40.42 | b3b5*b5y5                                   | 664.33  | 62.966  | 69953  | 1 | 664.33  | -6.89  |
| [Q7CPL6]RL18_SALTY 50S ribosomal protein L18                                                                     | 7  |                       | DVSFDRSGFYHGR                    | 88  | 14 | 3  | 25.15 | b4b9b10                                     | 1670.76 | 68.247  | 5507   | 3 | 557.59  | -3.58  |

|                                             |    |                      |                                    |     |    |    |        |                                                             |         |         |        |   |         |        |
|---------------------------------------------|----|----------------------|------------------------------------|-----|----|----|--------|-------------------------------------------------------------|---------|---------|--------|---|---------|--------|
| Q7CPL6 RL18_SALTY 50S ribosomal protein L18 | 8  |                      | SGFQYHGRVQALADAAR                  | 94  | 17 | 3  | 23.33  | b3b11b12                                                    | 1846.95 | 78.937  | 5086   | 3 | 616.32  | 9.58   |
| Q7CPL6 RL18_SALTY 50S ribosomal protein L18 | 9  |                      | YAQVIAPNGSEVLVAASTVEK              | 35  | 21 | 3  | 12.21  | b5*b5b9                                                     | 2146.12 | 64.419  | 3915   | 3 | 716.04  | -10.12 |
| Q7CPL6 RL18_SALTY 50S ribosomal protein L18 | 10 |                      | YTGNDKDAAAVVGK                     | 63  | 13 | 0  | 3.97   |                                                             | 1247.62 | 24.437  | 3599   | 3 | 416.54  | -11.55 |
| P65702 PGK_SALTY Phohoglycerate kinase      | 1  |                      | VLPVAMLEER                         | 373 | 11 | 5  | 25.12  | b3y2y7y8y11                                                 | 1227.68 | 80.872  | 205107 | 2 | 614.34  | -0.99  |
| P65702 PGK_SALTY Phohoglycerate kinase      | 2  | Carbamidomethyl+C(6) | FADVACAGPLLAELDALGK                | 156 | 20 | 21 | 160.96 | b2b3b5°b5b6b7b8b12y1y2y3y4y5y6y8y9y12y13y14y15y20           | 2002.04 | 99.778  | 203718 | 2 | 1001.52 | 4.94   |
| P65702 PGK_SALTY Phohoglycerate kinase      | 3  | Carbamidomethyl+C(5) | LLTTCDIPVPTDVR                     | 244 | 14 | 22 | 151.41 | b2b3b6°b6b7°b7b9°b9b12°b12y1y2y3y5y7y8y9y10y11°y11y12y14    | 1599.85 | 69.510  | 185004 | 2 | 800.43  | 2.67   |
| P65702 PGK_SALTY Phohoglycerate kinase      | 4  |                      | SVNDVKEDEQILDIGDASAQQLAEILK        | 272 | 27 | 14 | 49.67  | b1b2°b2b4b5°b5b11y1y2y3y4y5y13y15                           | 2941.52 | 100.999 | 183364 | 3 | 981.18  | 5.73   |
| P65702 PGK_SALTY Phohoglycerate kinase      | 5  |                      | VATEFSETAPATLK                     | 258 | 14 | 24 | 146.63 | b1b2b3°b3b4°b4b6°b6b7b9y1y2y3y5°y5y6y7y9°y9y10y11°y11y12y14 | 1464.76 | 53.463  | 142773 | 2 | 732.88  | 1.08   |
| P65702 PGK_SALTY Phohoglycerate kinase      | 6  |                      | VMVTSHLGRPTEGEYNNEEFSLLPVVNYLK     | 53  | 29 | 6  | 15.45  | b2b6b13b18y7y29                                             | 3321.66 | 93.118  | 138995 | 4 | 831.17  | -7.64  |
| P65702 PGK_SALTY Phohoglycerate kinase      | 7  |                      | TILWNGPVGVFEFPNFR                  | 302 | 17 | 10 | 46.74  | b2b6y4y5°y5y7y12y13°y13y17                                  | 1993.05 | 107.048 | 128193 | 2 | 997.03  | 6.49   |
| P65702 PGK_SALTY Phohoglycerate kinase      | 8  |                      | LTVLDSLK                           | 197 | 9  | 6  | 35.89  | b2y2y4y5y6y9                                                | 975.56  | 62.758  | 102441 | 2 | 488.28  | -11.57 |
| P65702 PGK_SALTY Phohoglycerate kinase      | 9  |                      | ADLNPVKEGK                         | 19  | 11 | 17 | 102.92 | b1b2b3b9°b9b10°b10y2y3y4y6°y6y7y8y9°y9y11                   | 1169.65 | 37.884  | 101674 | 2 | 585.33  | -1.88  |
| P65702 PGK_SALTY Phohoglycerate kinase      | 10 |                      | ASLPTIELALK                        | 38  | 11 | 4  | 44.41  | y4y6y7y8                                                    | 1155.69 | 78.054  | 77906  | 2 | 578.35  | -2.96  |
| P65702 PGK_SALTY Phohoglycerate kinase      | 11 |                      | MTDLDLAGK                          | 5   | 9  | 5  | 28.11  | b6b8y2y5y9                                                  | 963.47  | 49.301  | 53755  | 2 | 482.24  | -8.05  |
| P65702 PGK_SALTY Phohoglycerate kinase      | 12 |                      | LVKDYLDGVDVAEGELVVLENVR            | 90  | 23 | 5  | 21.8   | b14°b14y4y5y12                                              | 2544.36 | 98.092  | 51174  | 3 | 848.79  | 2.88   |
| P65702 PGK_SALTY Phohoglycerate kinase      | 13 |                      | IADQLIVGGGIANTFVAAQGHSVGK          | 206 | 25 | 7  | 37.87  | b3b4y3y6y7°y7y9                                             | 2423.30 | 78.941  | 41103  | 3 | 808.44  | -3.43  |
| P65702 PGK_SALTY Phohoglycerate kinase      | 14 |                      | MTDLDLAGKR                         | 5   | 10 | 6  | 48.69  | y3y7y8°y8y9y10                                              | 1119.58 | 43.728  | 40774  | 2 | 560.29  | -4.80  |
| P65702 PGK_SALTY Phohoglycerate kinase      | 15 | Carbamidomethyl+C(5) | YAALCDVFVMDAFGTAHR                 | 128 | 18 | 5  | 26.68  | b2b3b9y9y10                                                 | 2043.95 | 90.843  | 20526  | 3 | 681.99  | 4.54   |
| P65702 PGK_SALTY Phohoglycerate kinase      | 16 |                      | AQASTHGIGK                         | 146 | 10 | 11 | 69.31  | b2°b2b6y1y2y3y4y6y7y8y10                                    | 969.50  | 16.303  | 16114  | 2 | 485.26  | -6.74  |
| P65702 PGK_SALTY Phohoglycerate kinase      | 17 |                      | DYLDGVDVAEGELVVLENVR               | 93  | 20 | 3  | 13.01  | b17y4y11                                                    | 2204.09 | 83.418  | 9589   | 3 | 735.37  | -10.30 |
| P65702 PGK_SALTY Phohoglycerate kinase      | 18 |                      | SLYEADLVDEAKR                      | 231 | 13 | 6  | 26.74  | b4b9y5y10°y10y13                                            | 1508.75 | 107.925 | 3227   | 2 | 754.88  | -7.36  |
| P65702 PGK_SALTY Phohoglycerate kinase      | 19 |                      | LSNPVR                             | 84  | 6  | 1  | 12.8   | y5                                                          | 685.39  | 28.831  | 8110   | 2 | 343.20  | -13.71 |
| P65702 PGK_SALTY Phohoglycerate kinase      | 20 |                      | SLYEADLVDEAK                       | 231 | 12 | 5  | 34.24  | b3b7b10y8°y8                                                | 1352.66 | 136.424 | 3399   | 1 | 1352.66 | 1.62   |
| P65702 PGK_SALTY Phohoglycerate kinase      | 21 |                      | GTEIVANAIADSEAFSIAGGGDTLAIDLFGIADK | 320 | 35 | 4  | 10.95  | b7°b7y6y15                                                  | 3393.72 | 110.999 | 2523   | 3 | 1131.91 | 4.96   |
| P65702 PGK_SALTY Phohoglycerate kinase      | 22 |                      | ISYISTGGGAFLEFVEGK                 | 355 | 18 | 6  | 39.14  | b9b10°b10b12°b12b13                                         | 1874.95 | 81.473  | 2003   | 2 | 937.98  | -1.30  |
| P65702 PGK_SALTY Phohoglycerate kinase      | 23 | Carbamidomethyl+C(6) | RLLTTCDIPVPTDVR                    | 243 | 15 | 7  | 46.99  | b6b7°b7b8b10y4y14                                           | 1755.93 | 66.011  | 2299   | 2 | 878.47  | -5.07  |
| P65702 PGK_SALTY Phohoglycerate kinase      | 24 | Carbamidomethyl+C(6) | KYAALCDVFVMDAFGTAHR                | 127 | 19 | 3  | 13.48  | b13y9y12                                                    | 2172.03 | 86.879  | 1694   | 3 | 724.68  | -3.48  |

|                                          |    |                       |                                    |     |    |    |        |                                                        |         |         |        |   |         |        |
|------------------------------------------|----|-----------------------|------------------------------------|-----|----|----|--------|--------------------------------------------------------|---------|---------|--------|---|---------|--------|
| P65702 PGK_SALTY Phohoglycerate kinase   | 25 |                       | LNVPVKEGK                          | 21  | 9  | 0  | 2.98   |                                                        | 983.58  | 37.857  | 18915  | 2 | 492.29  | -9.56  |
| P65702 PGK_SALTY Phohoglycerate kinase   | 26 |                       | DLNVPVKEGK                         | 20  | 10 | 2  | 7.5    | b3°b3                                                  | 1098.60 | 37.861  | 18910  | 2 | 549.80  | -14.56 |
| P65702 PGK_SALTY Phohoglycerate kinase   | 27 |                       | TDLDLAGKR                          | 6   | 9  | 0  | 2.48   |                                                        | 988.54  | 43.745  | 13092  | 2 | 494.77  | -3.70  |
| P65702 PGK_SALTY Phohoglycerate kinase   | 28 |                       | ASTHGIGK                           | 148 | 8  | 4  | 21.07  | b4°b4b5°b5                                             | 770.41  | 16.307  | 3857   | 2 | 385.71  | -11.17 |
| P65702 PGK_SALTY Phohoglycerate kinase   | 29 |                       | QASTHGIGK                          | 147 | 9  | 4  | 31.61  | b3°b3b4b6                                              | 898.46  | 16.306  | 1723   | 2 | 449.74  | -11.07 |
| Q56073 DNAK_SALTY Chaperone protein dnaK | 1  |                       | IINEPTAAALAYGLDKEVGNR              | 167 | 21 | 21 | 187.39 | b3b4*b4b6b7y3y5y6y7°y7*y7y9y10y11y12y14y15y17y18y19y21 | 2215.17 | 75.801  | 76145  | 3 | 739.06  | -1.43  |
| Q56073 DNAK_SALTY Chaperone protein dnaK | 2  |                       | ASSGLNEEEIQK                       | 502 | 12 | 13 | 57.21  | b2°b2y1y5*y5y6°y6y7°y7y9y10°y10y12                     | 1304.63 | 35.772  | 25127  | 2 | 652.82  | -5.52  |
| Q56073 DNAK_SALTY Chaperone protein dnaK | 3  |                       | SLGQFNLDGINPAPR                    | 452 | 15 | 4  | 24.39  | y5y7y10y15                                             | 1598.84 | 72.781  | 24778  | 2 | 799.92  | 4.43   |
| Q56073 DNAK_SALTY Chaperone protein dnaK | 4  |                       | QAVTNPQNTLFAIK                     | 56  | 14 | 9  | 41.67  | b3*b3y1y2y3y9y10y11y14                                 | 1544.85 | 68.298  | 23970  | 2 | 772.93  | 1.50   |
| Q56073 DNAK_SALTY Chaperone protein dnaK | 5  |                       | TAEDYLGEVPVTEAVITVPAYFNDAQR        | 125 | 26 | 9  | 40.67  | b2b6b14y5y8y9y11y12y26                                 | 2869.40 | 94.233  | 23369  | 3 | 957.14  | 2.30   |
| Q56073 DNAK_SALTY Chaperone protein dnaK | 6  |                       | IELSSAQQTVDVNLPLYITADATGPK         | 270 | 24 | 4  | 18.02  | b2y5y8y13                                              | 2532.32 | 109.457 | 3592   | 3 | 844.78  | 13.50  |
| Q56073 DNAK_SALTY Chaperone protein dnaK | 7  |                       | FQDEEVQRDVSIMPYK                   | 76  | 16 | 4  | 25.02  | b8y4y8y11                                              | 1983.96 | 73.968  | 2603   | 2 | 992.48  | 4.55   |
| Q56073 DNAK_SALTY Chaperone protein dnaK | 8  |                       | LMEIAQQQHAQQAGSADASANNAK           | 597 | 25 | 3  | 11.5   | b5b9y11                                                | 2610.23 | 39.322  | 1572   | 3 | 870.75  | -2.34  |
| Q56073 DNAK_SALTY Chaperone protein dnaK | 9  |                       | TAIESALNALETALK                    | 562 | 15 | 5  | 22.33  | b10*b10y12*y12y13                                      | 1544.87 | 66.215  | 12252  | 2 | 772.94  | 10.67  |
| Q56073 DNAK_SALTY Chaperone protein dnaK | 10 |                       | EAAEK                              | 263 | 5  | 2  | 24.61  | b4y4                                                   | 547.27  | 69.540  | 11435  | 1 | 547.27  | -2.45  |
| Q56073 DNAK_SALTY Chaperone protein dnaK | 11 |                       | MPMVQK                             | 345 | 6  | 1  | 12.8   | b4                                                     | 733.37  | 32.643  | 10987  | 1 | 733.37  | 0.50   |
| Q56073 DNAK_SALTY Chaperone protein dnaK | 12 |                       | GMPQIEVTFDIDADGILHVSAK             | 467 | 22 | 4  | 27.65  | b3b6b8b10                                              | 2356.20 | 60.798  | 8560   | 3 | 786.07  | 7.05   |
| Q56073 DNAK_SALTY Chaperone protein dnaK | 13 |                       | TIAVYDLGGGTFDISIIEIDVDEGEK         | 188 | 26 | 4  | 16.56  | b10y4y6y11                                             | 2769.42 | 77.015  | 6734   | 3 | 923.81  | 18.51  |
| Q56073 DNAK_SALTY Chaperone protein dnaK | 14 |                       | MAPPQISAEVLK                       | 109 | 12 | 4  | 46.67  | b4b5b6b7                                               | 1283.70 | 83.470  | 4388   | 2 | 642.35  | -1.14  |
| Q56073 DNAK_SALTY Chaperone protein dnaK | 15 | Carbamidomethyl+C(12) | IIGIDLGTNTSCVAIMDGTQAR             | 3   | 22 | 3  | 12.26  | b14y7y10                                               | 2306.14 | 65.362  | 2536   | 2 | 1153.57 | -3.18  |
| Q56073 DNAK_SALTY Chaperone protein dnaK | 16 |                       | MQELAQVSQK                         | 587 | 10 | 4  | 31.61  | y3y6*y6y7                                              | 1161.59 | 38.277  | 2404   | 1 | 1161.59 | -4.62  |
| Q56073 DNAK_SALTY Chaperone protein dnaK | 17 |                       | FQDEEVQR                           | 76  | 8  | 3  | 38.4   | y4y5y7                                                 | 1050.46 | 25.974  | 1843   | 2 | 525.73  | -22.43 |
| Q56073 DNAK_SALTY Chaperone protein dnaK | 18 |                       | VAEFFGK                            | 352 | 7  | 6  | 53.22  | b3°b3b4°b4y3y6                                         | 797.41  | 63.713  | 1821   | 2 | 399.21  | -7.65  |
| Q56073 DNAK_SALTY Chaperone protein dnaK | 19 |                       | SIEPLK                             | 315 | 6  | 1  | 12.8   | b3                                                     | 686.40  | 40.735  | 1543   | 2 | 343.71  | -5.25  |
| Q56073 DNAK_SALTY Chaperone protein dnaK | 20 | Carbamidomethyl+C(15) | MGKIIIGIDLGTNTSCVAIMDGTQAR         | 0   | 25 | 4  | 11.5   | b15y9*y9y13                                            | 2622.29 | 85.878  | 192985 | 3 | 874.77  | -4.28  |
| Q56073 DNAK_SALTY Chaperone protein dnaK | 21 |                       | FQDEEVQRDVSIMPYK                   | 76  | 16 | 3  | 15.43  | b9y4y9                                                 | 1983.96 | 61.797  | 7718   | 3 | 661.99  | 6.77   |
| Q56073 DNAK_SALTY Chaperone protein dnaK | 22 |                       | GQKMAPPQISAEVLK                    | 106 | 15 | 4  | 24.39  | b4b5°b5b14                                             | 1596.85 | 66.074  | 6877   | 2 | 798.93  | -14.45 |
| Q56073 DNAK_SALTY Chaperone protein dnaK | 23 |                       | MQELAQVSQKLMEIAQQQHAQQAGSADASANNAK | 587 | 35 | 6  | 26.64  | b7b8°b8y5y7y13                                         | 3752.81 | 92.494  | 5927   | 4 | 938.96  | 0.98   |

|                                           |    |                       |                                 |     |    |    |       |                               |         |         |        |   |         |        |
|-------------------------------------------|----|-----------------------|---------------------------------|-----|----|----|-------|-------------------------------|---------|---------|--------|---|---------|--------|
| Q56073 DNAK_SALTY Chaperone protein dnaK  | 24 |                       | ASDNKSLGQFNLDGINPAPR            | 447 | 20 | 10 | 29.01 | b3°b3b7°b7b9°b9b10°b10y12*y12 | 2114.07 | 66.075  | 5074   | 3 | 705.36  | 2.66   |
| Q56073 DNAK_SALTY Chaperone protein dnaK  | 25 |                       | TTPSIIAYTQDGETLVGQPAKR          | 34  | 22 | 3  | 12.26 | b10b13y11                     | 2346.22 | 99.130  | 4274   | 2 | 1173.61 | -3.75  |
| Q56073 DNAK_SALTY Chaperone protein dnaK  | 26 | Carbamidomethyl+C(14) | GKIIGIDLTTNSCVAIMDGTQAR         | 1   | 24 | 4  | 11.71 | b14y9y13*y13                  | 2491.23 | 72.036  | 4203   | 3 | 831.08  | -12.64 |
| Q56073 DNAK_SALTY Chaperone protein dnaK  | 27 |                       | VALQDAGLSVSDINDVILVGGQT RMPMVQK | 321 | 30 | 6  | 12.81 | b11°b11b15°b15y10y18          | 3154.62 | 93.625  | 3508   | 3 | 1052.21 | -14.01 |
| Q56073 DNAK_SALTY Chaperone protein dnaK  | 28 |                       | QVEEAGDKLPADDK                  | 548 | 14 | 3  | 17.37 | b11y3y9                       | 1514.73 | 72.371  | 3232   | 2 | 757.87  | -1.21  |
| Q56073 DNAK_SALTY Chaperone protein dnaK  | 29 |                       | KTAEDYLGEPVTEAVITVPAYFND AQR    | 124 | 27 | 4  | 20.92 | b13y3y8y9                     | 2997.50 | 100.799 | 2414   | 3 | 999.84  | 6.76   |
| Q56073 DNAK_SALTY Chaperone protein dnaK  | 30 |                       | DQGIDLRNDPLAMQR                 | 246 | 15 | 3  | 24.39 | b4b7b8                        | 1741.89 | 92.621  | 1936   | 3 | 581.30  | 13.32  |
| Q56073 DNAK_SALTY Chaperone protein dnaK  | 31 |                       | KDVNPDEAVAIGAAVQGGVLTG DVK      | 362 | 25 | 5  | 21.98 | b4°b4b9°b9b10                 | 2423.25 | 107.206 | 1511   | 3 | 808.42  | -12.19 |
| Q56073 DNAK_SALTY Chaperone protein dnaK  | 32 | Phohoryl STY(15)      | TIAVYDLGGGTFDISIIEIDEVDGE K     | 188 | 26 | 3  | 21.11 | b10y10y11                     | 2849.35 | 89.905  | 4490   | 3 | 950.46  | 8.23   |
| Q56073 DNAK_SALTY Chaperone protein dnaK  | 33 | Phohoryl STY(16)      | TAEDYLGEVPVTEAVITVPAYFNDA QR    | 125 | 26 | 6  | 36.37 | b11b14y8y9*y9y10              | 2949.38 | 90.964  | 2722   | 3 | 983.80  | 11.59  |
| Q56073 DNAK_SALTY Chaperone protein dnaK  | 34 |                       | LMEIAQQQHA                      | 597 | 10 | 0  | 9.93  |                               | 1168.57 | 39.261  | 10052  | 3 | 390.20  | -4.91  |
| P60446 RL3_SALTY 50S ribosomal protein L3 | 1  |                       | VTVQSLDVVR                      | 169 | 10 | 11 | 69.31 | b2°b2b7y2y3y5y6y7°y7y8y10     | 1115.63 | 57.362  | 135959 | 2 | 558.32  | -7.66  |
| P60446 RL3_SALTY 50S ribosomal protein L3 | 2  |                       | IFTEDGVSIPTVIEVEANR             | 13  | 20 | 10 | 41.61 | b2b9b10y2y3y4°y4y7y15y20      | 2188.17 | 88.936  | 87990  | 2 | 1094.59 | 8.48   |
| P60446 RL3_SALTY 50S ribosomal protein L3 | 3  |                       | VTQVKDLANDGYR                   | 33  | 13 | 12 | 81.4  | b1b2°b2b7b10y3y4°y4y6y7y8y9   | 1478.74 | 40.847  | 23762  | 3 | 493.58  | -13.46 |
| P60446 RL3_SALTY 50S ribosomal protein L3 | 4  |                       | AVQVTTGAK                       | 46  | 9  | 8  | 57.48 | b2b3y3y4y5y7*y7y9             | 874.49  | 23.046  | 7946   | 2 | 437.75  | -7.89  |
| P60446 RL3_SALTY 50S ribosomal protein L3 | 5  | Carbamidomethyl+C(9)  | GGVPGATGCDLIVKPAVK              | 190 | 18 | 5  | 43.96 | y4y5y6y11y15                  | 1738.92 | 54.822  | 35909  | 3 | 580.31  | -16.64 |
| P60446 RL3_SALTY 50S ribosomal protein L3 | 6  |                       | NLLLVK                          | 184 | 6  | 5  | 62.01 | b3b4y3y4y5                    | 699.47  | 57.368  | 27016  | 1 | 699.47  | -2.88  |
| P60446 RL3_SALTY 50S ribosomal protein L3 | 7  |                       | TQDATHGNSLSHR                   | 128 | 13 | 5  | 43.19 | y3°y3y4y6y7                   | 1423.64 | 15.290  | 17356  | 3 | 475.22  | -16.12 |
| P60446 RL3_SALTY 50S ribosomal protein L3 | 8  |                       | GLWEFR                          | 77  | 6  | 3  | 25.1  | b4y4°y4                       | 807.41  | 47.716  | 13688  | 1 | 807.41  | -2.95  |
| P60446 RL3_SALTY 50S ribosomal protein L3 | 9  |                       | VPGSIGQNQTPGK                   | 141 | 13 | 8  | 26.74 | b3b9°b9°b9y5*y5y12*y12        | 1282.70 | 57.289  | 5525   | 2 | 641.85  | 17.42  |
| P60446 RL3_SALTY 50S ribosomal protein L3 | 10 |                       | LAEGEETVVGQISVELFADV K          | 83  | 22 | 4  | 22.13 | b3b10b11y11                   | 2384.21 | 76.992  | 2771   | 3 | 795.41  | 9.63   |
| P60446 RL3_SALTY 50S ribosomal protein L3 | 11 |                       | IFTEDGVSIPTVIEVEANRVTQVK        | 13  | 25 | 5  | 25.34 | b9y16y20y21y23                | 2743.49 | 95.755  | 107459 | 3 | 915.17  | 2.31   |
| P60446 RL3_SALTY 50S ribosomal protein L3 | 12 |                       | AGVEAGRGLWEFR                   | 70  | 13 | 4  | 23.4  | b3b4°b4y6                     | 1447.75 | 60.692  | 18837  | 2 | 724.38  | 0.76   |
| P60446 RL3_SALTY 50S ribosomal protein L3 | 13 |                       | VTQVKDLANDGYR                   | 33  | 13 | 6  | 26.74 | b7b12°b12y4°y4y7              | 1478.76 | 72.533  | 16992  | 2 | 739.88  | -1.65  |
| P60446 RL3_SALTY 50S ribosomal protein L3 | 14 |                       | DLANDGYRAVQVTTGAK               | 38  | 17 | 8  | 32.67 | b4°b4°b4b5°b5b8b10y13         | 1778.89 | 65.370  | 5195   | 2 | 889.95  | -8.44  |
| P60446 RL3_SALTY 50S ribosomal protein L3 | 15 |                       | WNFRTQDATHGNSLSHR               | 124 | 17 | 6  | 34.35 | b8b9y11°y11*y11y12            | 2026.97 | 65.286  | 2217   | 4 | 507.50  | 7.11   |
| P60446 RL3_SALTY 50S ribosomal protein L3 | 16 |                       | LAEGEETVVGQISVELFADVKK          | 83  | 23 | 8  | 39.82 | b3b4°b4b5b9b13°b13y14         | 2512.26 | 123.695 | 1965   | 3 | 838.09  | -6.71  |
| P60446 RL3_SALTY 50S ribosomal protein L3 | 17 |                       | KMAGQMGNER                      | 159 | 10 | 4  | 51.7  | y4y5y8y9                      | 1121.53 | 17.872  | 1584   | 2 | 561.27  | 5.55   |
| P60446 RL3_SALTY 50S ribosomal protein L3 | 18 |                       | IFTEDGVSIPTVIEVEANR             | 13  | 20 | 1  | 7.99  | y11                           | 2170.14 | 88.965  | 6306   | 3 | 724.05  | 0.34   |

|                                                         |    |                      |                                    |     |    |    |        |                                                      |         |         |        |   |         |        |
|---------------------------------------------------------|----|----------------------|------------------------------------|-----|----|----|--------|------------------------------------------------------|---------|---------|--------|---|---------|--------|
| P66541 RS2_SALTY 30S ribosomal protein S2               | 1  |                      | TVPMFNEALAE LNK                    | 45  | 14 | 19 | 129.02 | b2°b2b3°b3b5b7b9°b9b12y3y4y9y10°y10y11°y11y12*y12y14 | 1576.81 | 85.290  | 216510 | 2 | 788.91  | 3.17   |
| P66541 RS2_SALTY 30S ribosomal protein S2               | 2  |                      | ILFVGTK                            | 66  | 7  | 6  | 37.9   | y2y3°y3y4y6y7                                        | 777.48  | 58.012  | 65268  | 2 | 389.24  | -14.37 |
| P66541 RS2_SALTY 30S ribosomal protein S2               | 3  | Carbamidomethyl+C(6) | EAANSCDQFFVNHR                     | 81  | 14 | 10 | 51.22  | y1y3*y3y4y5*y5y7*y7y10y14                            | 1694.71 | 48.336  | 60012  | 3 | 565.58  | -11.31 |
| P66541 RS2_SALTY 30S ribosomal protein S2               | 4  |                      | EANNLGIPVFAIVDTSNDPDGVDFVIPGNDDAIR | 174 | 34 | 13 | 39.25  | b2°b2b5°b5°b5b6°b6b7°b7y8y12y16y34                   | 3569.74 | 105.001 | 24060  | 3 | 1190.58 | -0.48  |
| P66541 RS2_SALTY 30S ribosomal protein S2               | 5  |                      | MATVSMR                            | 0   | 7  | 4  | 34.89  | b4b7y4y5                                             | 795.39  | 51.870  | 12873  | 1 | 795.39  | 9.13   |
| P66541 RS2_SALTY 30S ribosomal protein S2               | 6  |                      | SQDLASQAEE SFVEAE                  | 225 | 16 | 5  | 23.13  | b1b4°b4b8b10                                         | 1739.77 | 73.942  | 12539  | 2 | 870.39  | 7.86   |
| P66541 RS2_SALTY 30S ribosomal protein S2               | 7  |                      | MKPFIFGAR                          | 26  | 9  | 4  | 41.66  | b6b7y3y4                                             | 1066.56 | 65.398  | 24259  | 2 | 533.79  | -21.40 |
| P66541 RS2_SALTY 30S ribosomal protein S2               | 8  |                      | DMGGLPDALFVIDADHEHIAIK             | 152 | 22 | 3  | 12.26  | b10y9y13                                             | 2377.23 | 82.203  | 3270   | 2 | 1189.12 | 20.54  |
| P66541 RS2_SALTY 30S ribosomal protein S2               | 9  |                      | WLGGMLTNWK                         | 95  | 10 | 9  | 50.2   | b3b4b9°b9y6°y6*y6y7°y7                               | 1205.62 | 63.689  | 1918   | 2 | 603.32  | 7.90   |
| P66541 RS2_SALTY 30S ribosomal protein S2               | 10 |                      | YWNPKMKPFIFGAR                     | 21  | 14 | 4  | 28.7   | b4b7b11y7                                            | 1754.94 | 77.351  | 25862  | 2 | 877.97  | 8.90   |
| P66541 RS2_SALTY 30S ribosomal protein S2               | 11 |                      | EGRSQDLASQAEE SFVEAE               | 222 | 19 | 7  | 38.76  | b8b9°b9b10°b10y4y6                                   | 2081.95 | 59.936  | 5004   | 3 | 694.66  | 11.96  |
| P66541 RS2_SALTY 30S ribosomal protein S2               | 12 |                      | LKDLETQSQDGT FEK                   | 113 | 15 | 3  | 22.33  | b7b8y10                                              | 1738.84 | 79.536  | 2519   | 2 | 869.92  | -7.02  |
| P66541 RS2_SALTY 30S ribosomal protein S2               | 13 | Oxidation+M(11)      | LENSLGGIKDMGGLPDALFVIDADHEHIAIK    | 143 | 31 | 3  | 22.4   | b3b13b14                                             | 3304.68 | 103.590 | 50278  | 4 | 826.93  | -1.03  |
| P66541 RS2_SALTY 30S ribosomal protein S2               | 14 | Oxidation+M(1)       | MATVSMR DMLK                       | 0   | 11 | 3  | 22.11  | b7y6y8                                               | 1298.62 | 68.364  | 6422   | 2 | 649.81  | -3.20  |
| P66541 RS2_SALTY 30S ribosomal protein S2               | 15 | Carbamidomethyl+C(6) | EAANSCDQFFVNHR                     | 81  | 14 | 0  | 4.47   |                                                      | 1676.72 | 48.333  | 7334   | 3 | 559.58  | 2.04   |
| P66541 RS2_SALTY 30S ribosomal protein S2               | 16 |                      | MATVSMR                            | 0   | 7  | 0  | 0.99   |                                                      | 777.38  | 51.843  | 2097   | 1 | 777.38  | 9.19   |
| P0A1S0 IHFA_SALTY Integration host factor subunit alpha | 1  |                      | TGEDIPITAR                         | 66  | 10 | 12 | 82.59  | b2b3°b3b4°b4y2y3y4y5y8y9y10                          | 1072.56 | 43.909  | 78558  | 2 | 536.78  | -6.71  |
| P0A1S0 IHFA_SALTY Integration host factor subunit alpha | 2  |                      | LSGFGNFDLR                         | 45  | 10 | 8  | 48.44  | b5b8y1y2y6y8y9y10                                    | 1125.57 | 73.144  | 24280  | 2 | 563.29  | -1.95  |
| P0A1S0 IHFA_SALTY Integration host factor subunit alpha | 3  |                      | ALENGEQVK                          | 36  | 9  | 5  | 41.66  | b6b8y6y7*y7                                          | 987.50  | 23.849  | 17925  | 2 | 494.25  | -8.47  |
| P0A1S0 IHFA_SALTY Integration host factor subunit alpha | 4  |                      | RNAKELVELFEEIR                     | 20  | 15 | 4  | 22.33  | b11y2y7y8                                            | 1894.00 | 113.429 | 1525   | 3 | 632.01  | -2.45  |
| P0A1S0 IHFA_SALTY Integration host factor subunit alpha | 5  |                      | ELVELFEEIR                         | 24  | 11 | 3  | 22.11  | b5b7y9                                               | 1423.72 | 94.298  | 2234   | 2 | 712.36  | -21.86 |
| P0A1S0 IHFA_SALTY Integration host factor subunit alpha | 6  |                      | ELVELFEEIRR                        | 24  | 12 | 3  | 20.17  | b5b9y6                                               | 1579.83 | 96.433  | 9463   | 3 | 527.28  | -13.68 |
| P0A1S0 IHFA_SALTY Integration host factor subunit alpha | 7  |                      | MALTKAEMSEYLF DK                   | 0   | 15 | 5  | 29.07  | b3b4y3°y3y6                                          | 1776.86 | 77.351  | 6349   | 3 | 592.96  | 4.67   |
| P0A1S0 IHFA_SALTY Integration host factor subunit alpha | 8  |                      | ALTKAEMSEYLF DK                    | 1   | 14 | 9  | 52.06  | b7°b7b8b10°b10b11y5°y5y11                            | 1645.81 | 63.679  | 3963   | 2 | 823.41  | -5.04  |
| P0A1S0 IHFA_SALTY Integration host factor subunit alpha | 9  |                      | DAKELVELFEEIR                      | 21  | 14 | 3  | 17.37  | b3b10y9                                              | 1737.88 | 65.378  | 3438   | 2 | 869.44  | -14.75 |
| P0A1S0 IHFA_SALTY Integration host factor subunit alpha | 10 |                      | ALENGEQVKLSGFGNFDLR                | 36  | 19 | 5  | 21.28  | b3b6°b6b14y6                                         | 2094.06 | 97.399  | 2628   | 2 | 1047.53 | -2.68  |
| P25077 MDH_SALTY Malate dehydrogenase                   | 1  |                      | NQLPSGSELSYDIAPVTPGVAVDLSHIPTAVK   | 21  | 33 | 12 | 34.62  | b1b2°b2b3b15y3y5y6y15y18y30y33                       | 3388.80 | 94.540  | 75753  | 3 | 1130.27 | 1.37   |
| P25077 MDH_SALTY Malate dehydrogenase                   | 2  |                      | VAVLGAAGGIGQALALLK                 | 2   | 19 | 13 | 87.84  | b3b9y1y2y3y4y5y6y7y9y11y12y19                        | 1735.09 | 120.306 | 58149  | 2 | 868.05  | 2.74   |
| P25077 MDH_SALTY Malate dehydrogenase                   | 3  |                      | FFSQPLLLGK                         | 262 | 10 | 3  | 31.61  | y3y4y6                                               | 1149.66 | 76.715  | 56672  | 2 | 575.34  | -1.49  |



|                                                |    |                      |                                       |     |    |    |        |                                                          |         |         |       |   |         |        |
|------------------------------------------------|----|----------------------|---------------------------------------|-----|----|----|--------|----------------------------------------------------------|---------|---------|-------|---|---------|--------|
| P25077 MDH_SALTY Malate dehydrogenase          | 4  | Carbamidomethyl+C(2) | ACVGIITNPVNTTVAIAAEVLKK               | 111 | 23 | 7  | 47.61  | b2b3b4b5b6b11y15                                         | 2382.33 | 105.362 | 42223 | 3 | 794.78  | -6.76  |
| P25077 MDH_SALTY Malate dehydrogenase          | 5  |                      | IQNAGTEVVEAK                          | 205 | 12 | 10 | 64.08  | b2b3y4y6y8y9y10°y10*y10y12                               | 1258.66 | 35.637  | 38361 | 2 | 629.83  | -2.72  |
| P25077 MDH_SALTY Malate dehydrogenase          | 6  |                      | AGGGSATLSMGQAAAR                      | 217 | 16 | 9  | 66.6   | b3b13y7y8y9°y9y10y11y16                                  | 1405.68 | 40.961  | 21877 | 2 | 703.35  | -1.22  |
| P25077 MDH_SALTY Malate dehydrogenase          | 7  |                      | SDLFNVNAGIVK                          | 87  | 12 | 4  | 30.39  | b4b6b11y1                                                | 1276.68 | 70.619  | 11947 | 2 | 638.84  | -9.18  |
| P25077 MDH_SALTY Malate dehydrogenase          | 8  |                      | GFSGEDATPALEGADVVLISAGVAR             | 56  | 31 | 3  | 16.76  | b4b15b17                                                 | 3086.52 | 98.958  | 3083  | 3 | 1029.51 | -13.53 |
| P25077 MDH_SALTY Malate dehydrogenase          | 9  |                      | NGVEER                                | 272 | 6  | 3  | 25.1   | y3°y3y4                                                  | 703.35  | 76.277  | 3579  | 1 | 703.35  | 13.19  |
| P25077 MDH_SALTY Malate dehydrogenase          | 10 |                      | IKGFSGEDATPALEGADVVLISAGVAR           | 54  | 27 | 5  | 25.5   | b9b11b12°b12b15                                          | 2643.39 | 88.355  | 5923  | 3 | 881.80  | -4.99  |
| P25077 MDH_SALTY Malate dehydrogenase          | 11 |                      | FFSQPLLLGKNGVEER                      | 262 | 16 | 4  | 15.43  | b3b6°b6y6                                                | 1833.99 | 108.746 | 4178  | 3 | 612.00  | 0.80   |
| P25077 MDH_SALTY Malate dehydrogenase          | 12 | Oxidation+M(10)      | AGGGSATLSMGQAAAR                      | 217 | 16 | 3  | 15.43  | b6b12y11                                                 | 1421.69 | 87.331  | 1831  | 2 | 711.35  | 5.58   |
| P25077 MDH_SALTY Malate dehydrogenase          | 13 | Oxidation+M(29)      | GFSGEDATPALEGADVVLISAGVAR             | 56  | 31 | 3  | 21.69  | b3b4y8                                                   | 3102.54 | 97.012  | 1657  | 3 | 1034.85 | -5.51  |
| P0A1Z2 SKP_SALTY Chaperone protein skp         | 1  |                      | IAIVNMGNLFQQVAQK                      | 23  | 16 | 22 | 137.63 | b2b3b5b8b12b13b15y1y2*y2y3y4y5*y5y6*y6y7*y7y12y13*y13y16 | 1773.98 | 90.672  | 99993 | 2 | 887.49  | 7.50   |
| P0A1Z2 SKP_SALTY Chaperone protein skp         | 2  |                      | TGVSNTLENEFK                          | 39  | 12 | 8  | 41.9   | y2y6y8*y8y9°y9y11y12                                     | 1338.65 | 58.789  | 68042 | 2 | 669.83  | 0.91   |
| P0A1Z2 SKP_SALTY Chaperone protein skp         | 3  |                      | VANDQSIDLVDANTVAYNSSDVK               | 126 | 24 | 4  | 14.96  | b6b10y4y15                                               | 2537.24 | 136.369 | 3270  | 2 | 1269.12 | 2.21   |
| P0A1Z2 SKP_SALTY Chaperone protein skp         | 4  |                      | QTFAQKAQAFEK                          | 91  | 12 | 3  | 30.39  | b4b7b11                                                  | 1396.71 | 82.768  | 11983 | 2 | 698.86  | -5.86  |
| P0A1Z2 SKP_SALTY Chaperone protein skp         | 5  |                      | IAIVNMGNLFQQVAQKTGVSNTLENEFK          | 23  | 28 | 11 | 46.29  | b8y3°y3y6°y6*y6y7y8°y8*y8y9                              | 3093.59 | 123.569 | 7718  | 3 | 1031.87 | -5.45  |
| P0A1Z2 SKP_SALTY Chaperone protein skp         | 6  |                      | MQRLQSMK                              | 67  | 8  | 3  | 33.63  | b6y4y7                                                   | 1021.53 | 65.369  | 7642  | 2 | 511.27  | 6.51   |
| P0A1Z2 SKP_SALTY Chaperone protein skp         | 7  |                      | AAELQKMETDLQSK                        | 53  | 14 | 4  | 28.7   | b4b7b13y3                                                | 1591.81 | 92.470  | 6195  | 2 | 796.41  | 8.90   |
| P0A1Z2 SKP_SALTY Chaperone protein skp         | 8  |                      | LEKDVMSQR                             | 82  | 9  | 10 | 77.57  | b3°b3b4b7°b7y4*y4y6y8°y8                                 | 1105.55 | 63.701  | 2122  | 2 | 553.28  | -10.93 |
| P0A1Z2 SKP_SALTY Chaperone protein skp         | 9  | Oxidation+M(11)      | WLLAAGLGLAMVTSQAADK                   | 3   | 20 | 4  | 22.43  | y3°y3y6y7                                                | 2003.08 | 104.492 | 3645  | 2 | 1002.04 | 6.58   |
| P55900 SERC_SALTY Phohoserine aminotransferase | 1  | Carbamidomethyl+C(7) | LAQQELCDWHGLGTSVMEISHR                | 20  | 22 | 11 | 54.87  | b3b10y3°y3y4y5°y5y9y10y12°y12                            | 2567.19 | 74.974  | 54223 | 4 | 642.55  | -7.61  |
| P55900 SERC_SALTY Phohoserine aminotransferase | 2  |                      | AQVFNFSSGPAMLPAEVLK                   | 1   | 19 | 17 | 71.5   | b2°b2b5°b5b6°b6b9b13b15°b15y3y6y13y15°y15y16y19          | 2006.06 | 92.193  | 44468 | 2 | 1003.53 | 9.31   |
| P55900 SERC_SALTY Phohoserine aminotransferase | 3  |                      | YGVIIYAGAQK                           | 188 | 10 | 7  | 51.45  | b2b3b7y4y5y6y10                                          | 1069.56 | 44.230  | 39404 | 2 | 535.29  | -3.42  |
| P55900 SERC_SALTY Phohoserine aminotransferase | 4  |                      | ASIYNAMPIEGVK                         | 335 | 13 | 12 | 57.97  | b1b3°b3b4b6°b6b7b8y1y2y9y13                              | 1392.71 | 60.072  | 29446 | 3 | 464.91  | -3.51  |
| P55900 SERC_SALTY Phohoserine aminotransferase | 5  |                      | MNVPFQLADNTLDK                        | 297 | 14 | 6  | 17.37  | b2b9°b9b12°b12y6                                         | 1605.82 | 99.086  | 3968  | 2 | 803.41  | 13.23  |
| P55900 SERC_SALTY Phohoserine aminotransferase | 6  | Carbamidomethyl+C(5) | AHESCP SILDYTVLNDNDSMFNTPTFAWYLSGLVFK | 217 | 37 | 4  | 22.84  | b2b12b13y17                                              | 4250.03 | 125.413 | 3097  | 3 | 1417.35 | 9.88   |
| P55900 SERC_SALTY Phohoserine aminotransferase | 7  |                      | ALTD FMIDFERR                         | 348 | 12 | 3  | 30.39  | y5y7y10                                                  | 1513.74 | 82.852  | 1656  | 2 | 757.37  | -5.32  |
| P55900 SERC_SALTY Phohoserine aminotransferase | 8  |                      | ALTD FMIDFER                          | 348 | 11 | 9  | 55.22  | b4°b4b5b7°b7y3y4°y4y9                                    | 1357.67 | 63.685  | 2564  | 2 | 679.34  | 21.58  |
| P55900 SERC_SALTY Phohoserine aminotransferase | 9  |                      | AELLYGVIDNSDFYRNDVAQANR               | 272 | 23 | 4  | 11.96  | b12°b12y14y18                                            | 2643.28 | 80.158  | 10065 | 3 | 881.77  | 0.37   |

|                                                 |    |                                       |                                                 |     |    |    |       |                                                         |         |         |       |   |         |        |
|-------------------------------------------------|----|---------------------------------------|-------------------------------------------------|-----|----|----|-------|---------------------------------------------------------|---------|---------|-------|---|---------|--------|
| [P55900]SERC_SALTY Phohoserine aminotransferase | 10 |                                       | SRMNVPFQLADNTLDK                                | 295 | 16 | 5  | 15.43 | b7°b7*b7b9y11                                           | 1848.91 | 60.886  | 2612  | 2 | 924.96  | -8.45  |
| [P55900]SERC_SALTY Phohoserine aminotransferase | 11 | Carbamidomethyl+C(14)                 | DLLNIPSNYKVLFCGGGR                              | 58  | 19 | 4  | 23.5  | b9y8y9y12                                               | 2160.11 | 100.899 | 2305  | 4 | 540.78  | 5.09   |
| [P55900]SERC_SALTY Phohoserine aminotransferase | 12 |                                       | GKEFIQVAAEAEQDFR                                | 42  | 16 | 10 | 50.76 | b4b10°b10b12*b12b13y4°y4y11y12                          | 1895.91 | 108.537 | 1904  | 2 | 948.46  | -1.80  |
| [P55900]SERC_SALTY Phohoserine aminotransferase | 13 | Oxidation+M(1)                        | MNVPFQLADNTLDK                                  | 297 | 14 | 4  | 30.18 | b3b10y4y5                                               | 1621.78 | 69.521  | 3898  | 4 | 406.20  | -6.40  |
| [P55900]SERC_SALTY Phohoserine aminotransferase | 14 | Carbamidomethyl+C(7); Oxidation+M(17) | LAQQELCDWHGLGTSVMEISHR                          | 20  | 22 | 4  | 22.13 | y5y6y8°y8                                               | 2583.19 | 92.450  | 2635  | 4 | 646.55  | -5.29  |
| [P55900]SERC_SALTY Phohoserine aminotransferase | 15 | Oxidation+M(8)                        | AQGGVAAMHK                                      | 257 | 10 | 3  | 24.62 | b3y6y8                                                  | 985.50  | 136.497 | 1589  | 1 | 985.50  | 11.64  |
| [P0A1H3]EFG_SALTY Elongation factor G           | 1  |                                       | VYSGVVNSGDTVLSNVK                               | 337 | 17 | 14 | 85.49 | b2b4°b4b5b17y4y5y9y10y11*y11y12y15y17                   | 1737.90 | 63.086  | 76441 | 2 | 869.46  | 1.76   |
| [P0A1H3]EFG_SALTY Elongation factor G           | 2  |                                       | IATDPFVGNLTFFR                                  | 323 | 14 | 8  | 38.66 | b2b4y1y4y6y7y10y14                                      | 1597.84 | 93.997  | 69262 | 2 | 799.42  | 2.98   |
| [P0A1H3]EFG_SALTY Elongation factor G           | 3  |                                       | IGEVHDGAATMDWMEQEQR                             | 39  | 20 | 6  | 25.61 | b3b12y4°y4y5y20                                         | 2331.99 | 63.275  | 60724 | 3 | 778.00  | -3.14  |
| [P0A1H3]EFG_SALTY Elongation factor G           | 4  |                                       | SGPLAGYPVVDLGVR                                 | 562 | 15 | 11 | 66.95 | b3°b3b5b6b7°b7y4y8y10y11y15                             | 1499.83 | 77.381  | 54616 | 2 | 750.42  | 4.96   |
| [P0A1H3]EFG_SALTY Elongation factor G           | 5  | Carbamidomethyl+C(11)                 | VLNNEILVTCGSAFK                                 | 255 | 16 | 7  | 15.43 | b1b2b4y4°y4y8°y8                                        | 1777.97 | 107.198 | 44335 | 3 | 593.33  | 10.23  |
| [P0A1H3]EFG_SALTY Elongation factor G           | 6  |                                       | LGANPVPLQLAIGAEEGFTGVVDL VK                     | 161 | 26 | 4  | 11.33 | b3b6°b6y14                                              | 2607.44 | 120.471 | 20344 | 3 | 869.82  | -1.22  |
| [P0A1H3]EFG_SALTY Elongation factor G           | 7  |                                       | VWTDEESNQTIAGMGELHLDIIV DR                      | 446 | 26 | 9  | 29.05 | b2b4b5b14°b14y3y6°y6y23                                 | 2954.42 | 136.476 | 18495 | 2 | 1477.71 | -13.47 |
| [P0A1H3]EFG_SALTY Elongation factor G           | 8  |                                       | LHFGSYHDVDSSELAFK                               | 577 | 17 | 5  | 14.67 | b8y1y12y16y17                                           | 1951.92 | 92.751  | 17830 | 3 | 651.31  | 0.38   |
| [P0A1H3]EFG_SALTY Elongation factor G           | 9  |                                       | GQYGHVVIDMYPLEPGSNPK                            | 512 | 20 | 7  | 35.57 | b6b11b12y9°y9y10°y10                                    | 2201.09 | 90.714  | 12647 | 3 | 734.37  | 11.31  |
| [P0A1H3]EFG_SALTY Elongation factor G           | 10 |                                       | VEVETPEENTGDVIGDL SR                            | 618 | 19 | 13 | 58.61 | b2b3b5°b5b6°b6b7b14y1y4y5°y5y13                         | 2058.95 | 95.540  | 9333  | 3 | 686.99  | -13.75 |
| [P0A1H3]EFG_SALTY Elongation factor G           | 11 |                                       | AINWNDADQGVTFEYEDIPADMQ DLANEWHQNLIESAASEELME K | 189 | 47 | 21 | 93.8  | b3b4b8b11b13°b13y2y3°y3y4y5°y5y6y7y8°y8y10y11°y11y13y29 | 5380.34 | 126.498 | 8460  | 4 | 1345.84 | -8.80  |
| [P0A1H3]EFG_SALTY Elongation factor G           | 12 | Carbamidomethyl+C(9)                  | DVTTGDTLCDPENPIILER                             | 389 | 19 | 5  | 13.48 | b4b8y2y11*y11                                           | 2158.05 | 65.326  | 5416  | 3 | 720.02  | 7.13   |
| [P0A1H3]EFG_SALTY Elongation factor G           | 13 |                                       | MEFPEPVISIAVEPK                                 | 408 | 15 | 4  | 24.39 | b2b9b11b13                                              | 1685.88 | 64.421  | 4495  | 3 | 562.63  | 1.01   |
| [P0A1H3]EFG_SALTY Elongation factor G           | 14 |                                       | IHAEVPLSEMGYATQLR                               | 653 | 18 | 6  | 21.43 | b14°b14y2y8y9*y9                                        | 2062.05 | 96.347  | 3321  | 4 | 516.27  | 2.60   |
| [P0A1H3]EFG_SALTY Elongation factor G           | 15 |                                       | VTDIEGK                                         | 497 | 7  | 9  | 74.81 | b3°b3b4b6y4°y4y5°y5y6                                   | 761.42  | 57.325  | 29587 | 2 | 381.21  | 18.76  |
| [P0A1H3]EFG_SALTY Elongation factor G           | 16 |                                       | GQSEVTGVK                                       | 643 | 10 | 4  | 31.61 | y3y4y8°y8                                               | 1033.50 | 26.518  | 24533 | 2 | 517.25  | -17.95 |
| [P0A1H3]EFG_SALTY Elongation factor G           | 17 |                                       | YDDAPNNVAQAVIEAR                                | 686 | 16 | 4  | 23.13 | y3°y3y6y14                                              | 1745.86 | 66.053  | 20104 | 2 | 873.43  | 7.83   |
| [P0A1H3]EFG_SALTY Elongation factor G           | 18 |                                       | VVGQIK                                          | 153 | 6  | 1  | 12.8  | b4                                                      | 643.41  | 46.073  | 19806 | 1 | 643.41  | -6.74  |
| [P0A1H3]EFG_SALTY Elongation factor G           | 19 |                                       | QANK                                            | 128 | 4  | 1  | 11.81 | b3                                                      | 460.25  | 31.387  | 8789  | 1 | 460.25  | -2.92  |
| [P0A1H3]EFG_SALTY Elongation factor G           | 20 |                                       | GITITSAATTAFWSGMAK                              | 59  | 18 | 7  | 38.86 | b9b14y3y5°y5y7y16                                       | 1813.95 | 69.574  | 6562  | 3 | 605.32  | 17.90  |
| [P0A1H3]EFG_SALTY Elongation factor G           | 21 |                                       | NIGISAHIDAGK                                    | 11  | 12 | 6  | 45.75 | b4b5b6b10°b10y7                                         | 1195.62 | 46.077  | 6159  | 2 | 598.32  | -16.74 |
| [P0A1H3]EFG_SALTY Elongation factor G           | 22 |                                       | HASDDEPFSALAFK                                  | 309 | 14 | 6  | 35.28 | b3b11y3y9y10°y10                                        | 1534.74 | 66.054  | 2595  | 2 | 767.87  | 16.46  |

|                                                                |    |                      |                                  |     |    |    |       |                                     |         |         |        |   |         |        |
|----------------------------------------------------------------|----|----------------------|----------------------------------|-----|----|----|-------|-------------------------------------|---------|---------|--------|---|---------|--------|
| P0A1H3 EFG_SALTY Elongation factor G                           | 23 |                      | ASYTMEFLKYDDAPNNVAQAVIE<br>AR    | 677 | 25 | 10 | 42.59 | b9°b9b12b13b14y4°y4y8°y<br>8y10     | 2816.36 | 85.301  | 50826  | 3 | 939.46  | 3.03   |
| P0A1H3 EFG_SALTY Elongation factor G                           | 24 |                      | VYSGVVNSGDTVLNSVKTAR             | 337 | 20 | 3  | 19.8  | b4b8b17                             | 2066.06 | 102.186 | 22042  | 2 | 1033.53 | -13.47 |
| P0A1H3 EFG_SALTY Elongation factor G                           | 25 |                      | GYEFINDIKGGVIPGEYIPAVDK          | 532 | 23 | 4  | 18.12 | b11y5y9y14                          | 2494.28 | 84.255  | 13609  | 3 | 832.10  | -2.45  |
| P0A1H3 EFG_SALTY Elongation factor G                           | 26 |                      | GGVIPGEYIPAVDKGIQEQLK            | 541 | 21 | 3  | 12.6  | b3b12y12                            | 2211.19 | 75.137  | 11964  | 3 | 737.74  | -3.20  |
| P0A1H3 EFG_SALTY Elongation factor G                           | 27 |                      | AKVTDIEGK                        | 495 | 9  | 4  | 35.89 | y3y5°y5y6                           | 960.52  | 26.813  | 7972   | 2 | 480.77  | -13.53 |
| P0A1H3 EFG_SALTY Elongation factor G                           | 28 |                      | IHAEVPLSEMFYATQLRSLTK            | 653 | 22 | 5  | 12.26 | b11°b11b14y15°y15                   | 2491.29 | 123.596 | 2243   | 3 | 831.10  | -5.00  |
| P0A1H3 EFG_SALTY Elongation factor G                           | 29 |                      | VWTDEESNQTHIAGMGELHLDIIV<br>DRMK | 446 | 28 | 5  | 25.3  | b3b4b11b13°b13                      | 3213.56 | 122.805 | 2001   | 3 | 1071.86 | -8.36  |
| P0A1H3 EFG_SALTY Elongation factor G                           | 30 |                      | INIIDTPGHVDFTIEVERSMR            | 83  | 21 | 4  | 22.26 | y6y7°y7y11                          | 2442.25 | 81.427  | 1690   | 3 | 814.75  | 1.30   |
| P0A1H3 EFG_SALTY Elongation factor G                           | 31 | Phohoryl STY(8)      | YLGGEELTEEEIK                    | 236 | 13 | 4  | 31.15 | b5b9b11y5                           | 1589.71 | 54.640  | 14393  | 3 | 530.57  | 12.29  |
| P0A1H3 EFG_SALTY Elongation factor G                           | 32 | Oxidation+M(16)      | GITITSAATTAFWSGMAK               | 59  | 18 | 7  | 36.52 | b3°b3b8y3y6y13y14                   | 1829.89 | 122.854 | 2366   | 2 | 915.45  | -8.94  |
| P0A1H3 EFG_SALTY Elongation factor G                           | 33 |                      | SNQTHIAGMGELHLDIIVDR             | 452 | 20 | 8  | 34.79 | b7°b7b10°b10b11b12°b12*<br>b12      | 2195.14 | 136.408 | 2504   | 2 | 1098.07 | -4.12  |
| P66643 RS9_SALTY 30S ribosomal<br>protein S9                   | 1  |                      | SLEQYFGR                         | 33  | 8  | 10 | 58.24 | b2b4y2y3y4y5*y5y6°y6y8              | 999.48  | 61.386  | 157794 | 2 | 500.25  | -5.92  |
| P66643 RS9_SALTY 30S ribosomal<br>protein S9                   | 2  |                      | GGGISGQAGAIR                     | 68  | 12 | 12 | 90.14 | b3b4b5°b5y4y5y6y7y8°y8*<br>y8y12    | 1043.55 | 34.477  | 154172 | 2 | 522.28  | -11.35 |
| P66643 RS9_SALTY 30S ribosomal<br>protein S9                   | 3  |                      | AENQYYGTGR                       | 1   | 10 | 7  | 48.69 | y4y5y6y8°y8y10*y10                  | 1158.51 | 27.895  | 47086  | 2 | 579.76  | -4.21  |
| P66643 RS9_SALTY 30S ribosomal<br>protein S9                   | 4  |                      | QPLELVDMVEK                      | 49  | 11 | 10 | 81.32 | b9°b9b11y4y5y6y7y9y10y<br>11        | 1300.69 | 74.912  | 22772  | 2 | 650.85  | 3.94   |
| P66643 RS9_SALTY 30S ribosomal<br>protein S9                   | 5  |                      | VFIKPGNGK                        | 18  | 9  | 4  | 43.67 | y3y5*y5y7                           | 959.55  | 30.343  | 35353  | 2 | 480.28  | -12.91 |
| P66643 RS9_SALTY 30S ribosomal<br>protein S9                   | 6  | Phohoryl STY(5)      | GGGISGQAGAIR                     | 68  | 12 | 4  | 37.13 | b3b4y9y10                           | 1123.53 | 79.547  | 2679   | 2 | 562.27  | 9.45   |
| P66643 RS9_SALTY 30S ribosomal<br>protein S9                   | 7  |                      | SGQAGAIR                         | 72  | 8  | 1  | 7.33  | b3                                  | 759.40  | 34.483  | 2964   | 1 | 759.40  | -13.50 |
| P0A7Z7 RPOA_SALTY DNA-directed<br>RNA polymerase subunit alpha | 1  |                      | VTLEPLER                         | 25  | 8  | 8  | 50.7  | y1y4°y4y5°y5y6y7y8                  | 956.53  | 53.058  | 50597  | 2 | 478.77  | -11.10 |
| P0A7Z7 RPOA_SALTY DNA-directed<br>RNA polymerase subunit alpha | 2  | Carbamidomethyl+C(6) | LLVDACYVER                       | 170 | 12 | 11 | 89.6  | b2b12y4y5y6°y6y7y8y9y10<br>y12      | 1421.71 | 60.131  | 49532  | 2 | 711.36  | 2.32   |
| P0A7Z7 RPOA_SALTY DNA-directed<br>RNA polymerase subunit alpha | 3  |                      | IAYNVEAAR                        | 182 | 9  | 13 | 83.34 | b2b5b8y3y4°y4y6*y6y7*y7<br>y8y9*y9  | 1006.52 | 40.054  | 34073  | 2 | 503.77  | -7.64  |
| P0A7Z7 RPOA_SALTY DNA-directed<br>RNA polymerase subunit alpha | 4  |                      | EGVQEDILEILLNLK                  | 71  | 15 | 13 | 53.4  | b2°b2b4b8b10°b10y1y2y3<br>y4y6y8y15 | 1725.97 | 122.821 | 16128  | 2 | 863.49  | 5.80   |
| P0A7Z7 RPOA_SALTY DNA-directed<br>RNA polymerase subunit alpha | 5  |                      | LVDIEQVSSTHAK                    | 12  | 13 | 4  | 29.38 | b3y4y5y7                            | 1426.73 | 46.470  | 81663  | 3 | 476.25  | -16.43 |
| P0A7Z7 RPOA_SALTY DNA-directed<br>RNA polymerase subunit alpha | 6  |                      | LVIEMETNGTIDPEEAIR               | 200 | 18 | 4  | 19.28 | b5b12y10y12                         | 2030.04 | 84.489  | 41407  | 3 | 677.35  | 16.18  |
| P0A7Z7 RPOA_SALTY DNA-directed<br>RNA polymerase subunit alpha | 7  |                      | MQGSVTEFLKPR                     | 0   | 12 | 3  | 27.38 | b7b9b10                             | 1392.71 | 60.709  | 25863  | 3 | 464.91  | -17.00 |

|                                                             |    |                       |                                      |     |    |    |       |                              |         |         |       |   |         |        |
|-------------------------------------------------------------|----|-----------------------|--------------------------------------|-----|----|----|-------|------------------------------|---------|---------|-------|---|---------|--------|
| P0A7Z7 RPOA_SALTY DNA-directed RNA polymerase subunit alpha | 8  | Carbamidomethyl+C(9)  | ILLSSMPGCAVTEVEIDGVLHEYS TK          | 45  | 26 | 3  | 22    | y4y5y7                       | 2848.42 | 91.690  | 15129 | 3 | 950.14  | 2.66   |
| P0A7Z7 RPOA_SALTY DNA-directed RNA polymerase subunit alpha | 9  |                       | AEAIHYGDLVQR                         | 271 | 13 | 4  | 18.63 | b8b12*b12y9                  | 1484.81 | 78.435  | 13358 | 2 | 742.91  | 18.91  |
| P0A7Z7 RPOA_SALTY DNA-directed RNA polymerase subunit alpha | 10 |                       | QPEVKEEKPEFDPILLRPVDDLELT VR         | 238 | 27 | 7  | 31.56 | b3b7*b7b9*b9b10b12           | 3204.70 | 114.118 | 1629  | 3 | 1068.91 | -3.43  |
| P0A7Z7 RPOA_SALTY DNA-directed RNA polymerase subunit alpha | 11 | Carbamidomethyl+C(6)  | LLVDACYVERIAYNVEAAR                  | 170 | 21 | 4  | 12.6  | b8b12y4°y4                   | 2409.21 | 80.829  | 1592  | 3 | 803.74  | -7.40  |
| P0A7Z7 RPOA_SALTY DNA-directed RNA polymerase subunit alpha | 12 | Oxidation+M(5)        | LVIEMETNGTIDPEEAIR                   | 200 | 18 | 5  | 19.28 | b6°b6b9y4y10                 | 2045.99 | 99.799  | 22709 | 3 | 682.67  | -9.43  |
| Q7CPE2 ATPB_SALTY ATP synthase subunit beta                 | 1  |                       | VALTGLTMAEK                          | 219 | 11 | 11 | 76.8  | b2y1y2°y2y3y4y5y6y8y9y11     | 1133.62 | 60.076  | 77110 | 2 | 567.31  | -2.48  |
| Q7CPE2 ATPB_SALTY ATP synthase subunit beta                 | 2  |                       | QLDPLVVGQEHYDTAR                     | 343 | 16 | 10 | 52.64 | b2b3°b3b16y3y4y9y10*y10y11   | 1840.90 | 58.776  | 43102 | 3 | 614.30  | -12.60 |
| Q7CPE2 ATPB_SALTY ATP synthase subunit beta                 | 3  |                       | TVNMMELIR                            | 156 | 9  | 10 | 55.72 | b2°b2b3°b3b4b8y1y5y7y9       | 1106.57 | 76.937  | 36953 | 2 | 553.79  | -1.32  |
| Q7CPE2 ATPB_SALTY ATP synthase subunit beta                 | 4  | Carbamidomethyl+C(6)  | VIDLMCPFAK                           | 132 | 10 | 8  | 60.74 | b2b3b8b9y4y7y8y10            | 1193.60 | 81.679  | 36671 | 2 | 597.31  | -2.15  |
| Q7CPE2 ATPB_SALTY ATP synthase subunit beta                 | 5  |                       | QIASLGIYPAVDPLDSTSR                  | 324 | 19 | 11 | 73.5  | b4b9y4y5y7°y7y11y12y13y14y19 | 2003.06 | 81.276  | 31856 | 2 | 1002.03 | 8.41   |
| Q7CPE2 ATPB_SALTY ATP synthase subunit beta                 | 6  |                       | FLSQPFFVAEVFTGGK                     | 399 | 18 | 5  | 21.19 | b2y3y5y7y18                  | 1958.02 | 100.478 | 31583 | 2 | 979.52  | 9.66   |
| Q7CPE2 ATPB_SALTY ATP synthase subunit beta                 | 7  |                       | MPSAVGYQPTLAEEMGVLQER                | 261 | 21 | 11 | 52.57 | b6b9b12y2y3y6y7y8y11*y11y21  | 2306.14 | 82.391  | 26592 | 2 | 1153.57 | 11.22  |
| Q7CPE2 ATPB_SALTY ATP synthase subunit beta                 | 8  |                       | VYDALEVQNGNEK                        | 25  | 13 | 6  | 31.15 | b2b3°b3b8b10y11              | 1478.72 | 45.510  | 19569 | 2 | 739.86  | 5.78   |
| Q7CPE2 ATPB_SALTY ATP synthase subunit beta                 | 9  |                       | NIAIEHSGYSVFAGVGER                   | 165 | 18 | 6  | 14.03 | b3b13°b13y2°y2y13            | 1905.94 | 67.193  | 2410  | 2 | 953.47  | -4.48  |
| Q7CPE2 ATPB_SALTY ATP synthase subunit beta                 | 10 |                       | AAPSYEELSNSQELLETKIK                 | 112 | 20 | 7  | 40.47 | b9b15°b15y4y5y6y14           | 2179.09 | 74.495  | 20543 | 2 | 1090.05 | 7.51   |
| Q7CPE2 ATPB_SALTY ATP synthase subunit beta                 | 11 |                       | GLDVK                                | 65  | 5  | 1  | 12.3  | b3                           | 531.31  | 41.748  | 9452  | 1 | 531.31  | 1.03   |
| Q7CPE2 ATPB_SALTY ATP synthase subunit beta                 | 12 |                       | YQELK                                | 367 | 5  | 2  | 12.3  | y4°y4                        | 680.36  | 32.029  | 8797  | 1 | 680.36  | -2.96  |
| Q7CPE2 ATPB_SALTY ATP synthase subunit beta                 | 13 |                       | GIMEGEYDHLPEQAFYMVGSIDE AVEK         | 429 | 27 | 4  | 16.15 | b5y6y8y11                    | 3057.45 | 93.315  | 8446  | 3 | 1019.82 | 20.84  |
| Q7CPE2 ATPB_SALTY ATP synthase subunit beta                 | 14 |                       | TGSITSVQAVYVPADDLTDPATTF AHLDATVVLSR | 287 | 37 | 4  | 24.71 | b4b5b9b14                    | 3815.97 | 131.765 | 3300  | 4 | 954.75  | 9.98   |
| Q7CPE2 ATPB_SALTY ATP synthase subunit beta                 | 15 | Carbamidomethyl+C(26) | AAPSYEELSNSQELLETKIKVIDLM CPFAK      | 112 | 30 | 8  | 57.55 | b3b6b7b8y4y5y6y28            | 3353.67 | 121.223 | 37511 | 3 | 1118.56 | 1.82   |
| Q7CPE2 ATPB_SALTY ATP synthase subunit beta                 | 16 |                       | NIAIEHSGYSVFAGVGERTR                 | 165 | 20 | 4  | 13.01 | b8*b8b11y9                   | 2163.09 | 74.855  | 27425 | 3 | 721.70  | -3.05  |
| Q7CPE2 ATPB_SALTY ATP synthase subunit beta                 | 17 |                       | GEIGEEERWAIHR                        | 99  | 13 | 3  | 18.63 | b4b12y8                      | 1581.79 | 61.924  | 12652 | 2 | 791.40  | 9.72   |
| Q7CPE2 ATPB_SALTY ATP synthase subunit beta                 | 18 |                       | IMNVLGEPVDMKEIGEEER                  | 87  | 20 | 4  | 22.97 | b11y5y7y8                    | 2245.09 | 110.051 | 3917  | 3 | 749.03  | 2.61   |
| Q7CPE2 ATPB_SALTY ATP synthase subunit beta                 | 19 | Phohoryl STY(4)       | GVQSILQR                             | 359 | 8  | 5  | 33.63 | b3y5°y5*y5y7                 | 980.47  | 39.966  | 8147  | 2 | 490.74  | -8.78  |
| Q7CPE2 ATPB_SALTY ATP synthase subunit beta                 | 20 | Oxidation+M(4)        | TIAMGSSDGLRR                         | 53  | 12 | 5  | 45.75 | b5y6y8y9y10                  | 1279.63 | 63.676  | 11654 | 2 | 640.32  | -9.25  |
| Q7CPE2 ATPB_SALTY ATP synthase subunit beta                 | 21 | Oxidation+M(4)        | TIAMGSSDGLR                          | 53  | 11 | 5  | 32.19 | b4°b4b6y3y6                  | 1123.55 | 98.680  | 4758  | 1 | 1123.55 | 11.84  |
| Q7CPE2 ATPB_SALTY ATP synthase subunit beta                 | 22 |                       | HSGYSVFAGVGER                        | 170 | 13 | 0  | 6.46  |                              | 1365.67 | 67.192  | 10722 | 2 | 683.34  | 9.39   |

|                                                                     |    |                                             |                                      |     |    |    |       |                                      |         |         |        |   |         |        |
|---------------------------------------------------------------------|----|---------------------------------------------|--------------------------------------|-----|----|----|-------|--------------------------------------|---------|---------|--------|---|---------|--------|
| P10367 HIS2_SALTY Histidine biosynthesis bifunctional protein hisIE | 1  |                                             | TDGLMPAIVQHAVSGEVLMLGY MNPQALDK      | 14  | 30 | 10 | 23.42 | b1b9°b9b11°b11y1y2y9y10y30           | 3198.64 | 136.431 | 28117  | 4 | 800.42  | 13.89  |
| P10367 HIS2_SALTY Histidine biosynthesis bifunctional protein hisIE | 2  |                                             | TADPTSSYTAK                          | 126 | 11 | 10 | 59.99 | b2°b2b3b8b10y4y8y9°y9y11             | 1141.53 | 27.817  | 16557  | 2 | 571.27  | -4.60  |
| P10367 HIS2_SALTY Histidine biosynthesis bifunctional protein hisIE | 3  |                                             | MLTEQQR                              | 0   | 7  | 5  | 34.89 | b5°b5y4°y4y5                         | 905.45  | 60.131  | 8979   | 2 | 453.23  | -3.24  |
| P10367 HIS2_SALTY Histidine biosynthesis bifunctional protein hisIE | 4  | Carbamidomethyl+C(17);Carbamidomethyl+C(33) | GETSGHVLNVSVIAPDCDNDTLL VLANPVGPTCHK | 64  | 35 | 5  | 15.18 | b3b11b14y7y10                        | 3699.84 | 115.265 | 3296   | 4 | 925.72  | 7.52   |
| P10367 HIS2_SALTY Histidine biosynthesis bifunctional protein hisIE | 5  |                                             | VGEEGVETALAATVNDR                    | 149 | 17 | 6  | 32.67 | b10y3y6y7°y7y9                       | 1730.88 | 83.504  | 17250  | 2 | 865.95  | 16.08  |
| P10367 HIS2_SALTY Histidine biosynthesis bifunctional protein hisIE | 6  |                                             | FELTNEASDLMYHLLVLLQDQDL NLTTVIDNLR   | 166 | 33 | 10 | 46.37 | b5b6°b6°b6b8b9b11y8y13y14            | 3859.96 | 114.013 | 7909   | 4 | 965.75  | -4.62  |
| P10367 HIS2_SALTY Histidine biosynthesis bifunctional protein hisIE | 7  | Carbamidomethyl+C(5)                        | GTSSCFGDASHQWLFLYQLEQLL AER          | 99  | 26 | 3  | 22    | y3y4y7                               | 3056.48 | 117.865 | 7375   | 3 | 1019.50 | 6.23   |
| P10367 HIS2_SALTY Histidine biosynthesis bifunctional protein hisIE | 8  |                                             | KTADPTSSYTAK                         | 125 | 12 | 4  | 44.91 | y4y5y8y9                             | 1269.63 | 24.501  | 7151   | 2 | 635.32  | 1.92   |
| P10367 HIS2_SALTY Histidine biosynthesis bifunctional protein hisIE | 9  |                                             | MLTEQQR                              | 0   | 8  | 6  | 47.69 | b3°b3b4y3*y3y5                       | 1061.55 | 97.508  | 4941   | 1 | 1061.55 | -6.32  |
| P10367 HIS2_SALTY Histidine biosynthesis bifunctional protein hisIE | 10 | Oxidation+M(11)                             | FELTNEASDLMYHLLVLLQDQDL NLTTVIDNLR   | 166 | 33 | 3  | 16.67 | b6b8b23                              | 3875.93 | 118.066 | 10282  | 4 | 969.74  | -10.90 |
| P10367 HIS2_SALTY Histidine biosynthesis bifunctional protein hisIE | 11 | Oxidation+M(5)                              | TDGLMPAIVQHAVSGEVLMLGY MNPQALDK      | 14  | 30 | 4  | 12.81 | b5b15y3y13                           | 3214.58 | 87.358  | 3361   | 3 | 1072.20 | -4.03  |
| P10367 HIS2_SALTY Histidine biosynthesis bifunctional protein hisIE | 12 |                                             | TDGLMPAIVQHAVSGEVLMLGY MNPQA         | 14  | 27 | 3  | 12.61 | y4y12°y12                            | 2842.43 | 136.473 | 6117   | 2 | 1421.72 | 11.34  |
| P10367 HIS2_SALTY Histidine biosynthesis bifunctional protein hisIE | 13 |                                             | AIVQHAVSGEVLMLGYMNPQAL DK            | 20  | 24 | 1  | 10.74 | b3                                   | 2584.29 | 136.376 | 4638   | 2 | 1292.65 | -13.89 |
| P26976 PHON_SALTY Non-ecific acid phohatase                         | 1  |                                             | IFVVGAK                              | 85  | 9  | 9  | 69.79 | b3y1y3y4y6y7y8°y8y9                  | 917.53  | 52.082  | 102546 | 2 | 459.27  | -14.70 |
| P26976 PHON_SALTY Non-ecific acid phohatase                         | 2  |                                             | LQTIPAFQK                            | 215 | 9  | 4  | 43.67 | y3y5y7y9                             | 1045.59 | 55.936  | 96693  | 2 | 523.30  | -10.86 |
| P26976 PHON_SALTY Non-ecific acid phohatase                         | 3  |                                             | YVGAVEFAR                            | 206 | 9  | 9  | 88.11 | b2b3b4b5y3y5y7y8y9                   | 1011.52 | 52.323  | 88516  | 2 | 506.26  | -7.72  |
| P26976 PHON_SALTY Non-ecific acid phohatase                         | 4  |                                             | NGSYPSGHTAYGTLLALVLSEARPER           | 150 | 26 | 7  | 24.79 | b2°b2y5y8y11y22y26                   | 2759.38 | 97.149  | 70777  | 4 | 690.60  | -12.48 |
| P26976 PHON_SALTY Non-ecific acid phohatase                         | 5  | Carbamidomethyl+C(3)                        | VICGAHWQSDVDAGR                      | 191 | 15 | 11 | 74.82 | b2b6b12y3y5°y5y6y7y9y13y15           | 1670.75 | 46.546  | 50243  | 3 | 557.59  | -13.15 |
| P26976 PHON_SALTY Non-ecific acid phohatase                         | 6  |                                             | DTPETWNMLK                           | 98  | 10 | 11 | 64    | b10°b10y3y5y6°y6*y6y7°y7y8y10        | 1234.58 | 66.116  | 34693  | 2 | 617.79  | 3.36   |
| P26976 PHON_SALTY Non-ecific acid phohatase                         | 7  |                                             | NLLTMGGYYATASAK                      | 108 | 15 | 3  | 24.39 | y9y11y13                             | 1560.77 | 59.012  | 7894   | 3 | 520.93  | -1.64  |
| P26976 PHON_SALTY Non-ecific acid phohatase                         | 8  |                                             | QAAEDADVSVENIAR                      | 70  | 15 | 3  | 22.33 | b13y12y13                            | 1587.77 | 51.484  | 19432  | 2 | 794.39  | 2.77   |
| P26976 PHON_SALTY Non-ecific acid phohatase                         | 9  |                                             | NLLTMGGYYATASAKK                     | 108 | 16 | 10 | 41.47 | b5°b5b8°b8°b8b11°b11y10y11y14        | 1688.86 | 65.303  | 25301  | 3 | 563.62  | -7.37  |
| P26976 PHON_SALTY Non-ecific acid phohatase                         | 10 |                                             | WKQAAEDADVSVENIAR                    | 68  | 17 | 12 | 38.36 | b9°b9b11°b11°b11y7*y7y9*y9y10*y10y13 | 1901.92 | 63.694  | 17788  | 4 | 476.24  | -6.23  |

|                                                                    |    |                       |                                                 |     |    |    |       |                                        |         |         |       |   |         |        |
|--------------------------------------------------------------------|----|-----------------------|-------------------------------------------------|-----|----|----|-------|----------------------------------------|---------|---------|-------|---|---------|--------|
| [P26976]PHON_SALTY Non-ecific acid phohatase                       | 11 |                       | INPKDTPETWNMLK                                  | 94  | 14 | 5  | 25.94 | y7y11°y11y13*y13                       | 1686.85 | 106.441 | 16085 | 2 | 843.93  | -3.04  |
| [P26976]PHON_SALTY Non-ecific acid phohatase                       | 12 | Carbamidomethyl+C(11) | GWEFGQSRVICGAHWQSDVDAGR                         | 183 | 23 | 3  | 11.96 | b13y4y8                                | 2618.22 | 60.756  | 1668  | 3 | 873.41  | 11.19  |
| [P26976]PHON_SALTY Non-ecific acid phohatase                       | 13 | Phohoryl STY(4)       | NLLTMGGYYATASAKK                                | 108 | 16 | 4  | 15.43 | b3*b3y9y11                             | 1768.81 | 83.460  | 5283  | 3 | 590.27  | -9.11  |
| [P26976]PHON_SALTY Non-ecific acid phohatase                       | 14 | Phohoryl STY(9)       | INPKDTPETWNMLK                                  | 94  | 14 | 5  | 27.91 | b4b7*b7b8y4                            | 1766.82 | 38.801  | 1846  | 3 | 589.61  | 4.15   |
| [P26976]PHON_SALTY Non-ecific acid phohatase                       | 15 | Oxidation+M(12)       | INPKDTPETWNMLK                                  | 94  | 14 | 5  | 28.7  | b8b10b12y5*y5                          | 1702.84 | 73.935  | 44120 | 2 | 851.92  | -4.80  |
| [P26976]PHON_SALTY Non-ecific acid phohatase                       | 16 | Oxidation+M(5)        | NLLTMGGYYATASAK                                 | 108 | 15 | 7  | 33.44 | b6°b6b11*b11b12y8y12                   | 1576.79 | 82.646  | 4415  | 3 | 526.27  | 12.85  |
| [P26976]PHON_SALTY Non-ecific acid phohatase                       | 17 |                       | GAVEFAR                                         | 208 | 7  | 2  | 21.82 | b4b6                                   | 749.39  | 52.308  | 5099  | 1 | 749.39  | -3.67  |
| [P26976]PHON_SALTY Non-ecific acid phohatase                       | 18 |                       | IFVVGAK                                         | 85  | 9  | 1  | 8.27  | y5                                     | 899.53  | 52.055  | 8678  | 2 | 450.27  | -1.70  |
| [P0A2C7]POTD_SALTY ermidine/putrescine-binding periplasmic protein | 1  |                       | TITSWADLWKPEYK                                  | 146 | 14 | 8  | 44.68 | b12y1y2y4y5y11y12y14                   | 1737.86 | 83.786  | 70095 | 3 | 579.96  | -12.29 |
| [P0A2C7]POTD_SALTY ermidine/putrescine-binding periplasmic protein | 2  |                       | EGGIFWMDSLAIPANAK                               | 249 | 17 | 14 | 47.28 | b3b5b6°b6b12°b12y1y2y5*y5y7y12*y12y17  | 1819.91 | 94.407  | 49983 | 2 | 910.46  | 4.56   |
| [P0A2C7]POTD_SALTY ermidine/putrescine-binding periplasmic protein | 3  |                       | EVAETIGYPTPNLAAR                                | 285 | 16 | 7  | 48.66 | b7y7y8y10y11y13y16                     | 1701.89 | 61.863  | 41577 | 2 | 851.45  | 5.59   |
| [P0A2C7]POTD_SALTY ermidine/putrescine-binding periplasmic protein | 4  |                       | DGAYDLVVPSTYYVDK                                | 73  | 16 | 3  | 15.43 | b9b11y8                                | 1804.89 | 74.930  | 6274  | 2 | 902.95  | 13.59  |
| [P0A2C7]POTD_SALTY ermidine/putrescine-binding periplasmic protein | 5  |                       | NSLLLTDDAR                                      | 160 | 10 | 4  | 26.38 | b2b7y3y4                               | 1117.59 | 62.369  | 4312  | 2 | 559.30  | 7.97   |
| [P0A2C7]POTD_SALTY ermidine/putrescine-binding periplasmic protein | 6  |                       | QAGTPLEVWPK                                     | 237 | 12 | 7  | 45.75 | b4b7b8*b8b10°b10y3                     | 1324.75 | 57.281  | 34552 | 3 | 442.26  | 21.65  |
| [P0A2C7]POTD_SALTY ermidine/putrescine-binding periplasmic protein | 7  |                       | EIEAAYEELK                                      | 190 | 10 | 3  | 24.62 | b5b8y3                                 | 1194.61 | 55.098  | 25537 | 2 | 597.81  | 14.71  |
| [P0A2C7]POTD_SALTY ermidine/putrescine-binding periplasmic protein | 8  |                       | LTNFHNLDP EMLNKPFPDPNN DYS VPYIWGATAIGVNSDAIDPK | 103 | 43 | 4  | 11.75 | b26°b26y6y21                           | 4803.23 | 118.603 | 8738  | 4 | 1201.56 | -15.35 |
| [P0A2C7]POTD_SALTY ermidine/putrescine-binding periplasmic protein | 9  |                       | SLYPDAQTISK                                     | 312 | 11 | 4  | 33.87 | y7y8°y8y9                              | 1222.62 | 76.333  | 6363  | 2 | 611.81  | -8.19  |
| [P0A2C7]POTD_SALTY ermidine/putrescine-binding periplasmic protein | 10 |                       | EGMIQK                                          | 92  | 6  | 1  | 12.8  | b5                                     | 705.36  | 42.052  | 4889  | 1 | 705.36  | -1.64  |
| [P0A2C7]POTD_SALTY ermidine/putrescine-binding periplasmic protein | 11 |                       | EGGIFWMDSLAIPANAKNK                             | 249 | 19 | 4  | 20.44 | b5°b5b11b13                            | 2062.02 | 71.097  | 4030  | 3 | 688.01  | -9.71  |
| [P0A2C7]POTD_SALTY ermidine/putrescine-binding periplasmic protein | 12 |                       | DGAYDLVVPSTYYVDKMR                              | 73  | 18 | 14 | 88.54 | b3b7b8°b8b10°b10b12y6y7y9y11y12°y12y15 | 2092.03 | 122.861 | 1867  | 3 | 698.02  | 13.77  |
| [P0A2C7]POTD_SALTY ermidine/putrescine-binding periplasmic protein | 13 | Phohoryl STY(15)      | TYKDGAYDLVVPSTYYVDK                             | 70  | 19 | 3  | 13.48 | b10b13_H3PO4 b13y3                     | 2277.04 | 60.142  | 4243  | 4 | 570.02  | 7.61   |
| [P0A2C7]POTD_SALTY ermidine/putrescine-binding periplasmic protein | 14 | Phohoryl STY(10)      | EVAETIGYPTPNLAARK                               | 285 | 17 | 3  | 14.67 | b3b8y8                                 | 1909.94 | 117.951 | 3655  | 2 | 955.47  | 4.99   |

|                                                                                 |    |                       |                                        |     |    |    |        |                                                                                   |         |         |        |   |         |        |
|---------------------------------------------------------------------------------|----|-----------------------|----------------------------------------|-----|----|----|--------|-----------------------------------------------------------------------------------|---------|---------|--------|---|---------|--------|
| P0A2C7 POTD_SALTY<br>ermidine/putrescine-binding periplasmic<br>protein         | 15 |                       | TSWADLWKPEYK                           | 148 | 12 | 1  | 7.23   | b10                                                                               | 1523.77 | 83.818  | 4229   | 2 | 762.39  | 11.14  |
| P66032 RIBB_SALTY 3                                                             | 1  | Carbamidomethyl+C(4)  | APECIAFAGQHNMVVTIEDLVA<br>YR           | 184 | 25 | 6  | 20     | b2b8b13y3y5y7                                                                     | 2775.37 | 99.707  | 56347  | 3 | 925.80  | 4.49   |
| P66032 RIBB_SALTY 3                                                             | 2  |                       | MNQTLSSFGTPFER                         | 0   | 15 | 12 | 94.11  | b2b5°b5b10y3y4y6y7y9y1<br>0y12y15                                                 | 1727.85 | 85.470  | 46381  | 2 | 864.43  | 6.99   |
| P66032 RIBB_SALTY 3                                                             | 3  |                       | VELALDALR                              | 15  | 9  | 6  | 14.55  | b2b3y2y4°y4y9                                                                     | 999.58  | 70.099  | 38140  | 2 | 500.29  | -5.31  |
| P66032 RIBB_SALTY 3                                                             | 4  | Carbamidomethyl+C(23) | GGHTEATIDLMTLAGFKPAGVLC<br>ELTNDDGTMAR | 150 | 34 | 13 | 30.91  | b3b7b9°b9b12°b12b30y4°y<br>4y6y10°y10*y10                                         | 3562.77 | 123.577 | 26975  | 3 | 1188.26 | 20.28  |
| P66032 RIBB_SALTY 3                                                             | 5  |                       | DGAKPSDLNRPGHVFPPLR                    | 123 | 18 | 5  | 21.43  | b14°b14b15°b15y14                                                                 | 1976.01 | 100.161 | 2857   | 2 | 988.51  | -16.43 |
| P66032 RIBB_SALTY 3                                                             | 6  |                       | VELALDALREGR                           | 15  | 12 | 5  | 24.15  | b4°b4y9°y9y10                                                                     | 1341.73 | 64.441  | 60507  | 2 | 671.37  | -10.74 |
| P66032 RIBB_SALTY 3                                                             | 7  |                       | NQTLSSFGTPFERVELALDALR                 | 1   | 23 | 4  | 18.12  | b5b7b11y4                                                                         | 2577.34 | 117.201 | 1686   | 3 | 859.78  | -11.18 |
| P66032 RIBB_SALTY 3                                                             | 8  | Oxidation+M(1)        | MNQTLSSFGTPFER                         | 0   | 15 | 4  | 26.7   | b13y3y4y10                                                                        | 1743.85 | 83.095  | 2684   | 2 | 872.43  | 6.02   |
| P0A2B3 RS7_SALTY 30S ribosomal<br>protein S7                                    | 1  |                       | STAESIVYSALETLAQR                      | 36  | 17 | 15 | 67.36  | b1b2°b2b7°b7b12b13°b13y<br>1y3*y3y4y5y6y9                                         | 1838.93 | 107.293 | 111029 | 3 | 613.65  | -11.95 |
| P0A2B3 RS7_SALTY 30S ribosomal<br>protein S7                                    | 2  |                       | SELEAFEVALENVRPTVEVK                   | 56  | 20 | 7  | 13.01  | b2b3°b3b8y1y11y20                                                                 | 2259.18 | 92.630  | 64543  | 3 | 753.73  | -2.49  |
| P0A2B3 RS7_SALTY 30S ribosomal<br>protein S7                                    | 3  |                       | FVNILMVDGK                             | 25  | 10 | 8  | 69.31  | b2b3y2y3y4y5y6y8                                                                  | 1135.62 | 76.550  | 63251  | 2 | 568.31  | -1.93  |
| P0A2B3 RS7_SALTY 30S ribosomal<br>protein S7                                    | 4  |                       | FGSELLAK                               | 17  | 8  | 5  | 61.25  | b6y3y4y6y7                                                                        | 864.47  | 52.429  | 154201 | 2 | 432.74  | -18.71 |
| P0A2B3 RS7_SALTY 30S ribosomal<br>protein S7                                    | 5  |                       | WIVEAAR                                | 102 | 7  | 6  | 74.81  | b4b5y3y4y5y6                                                                      | 844.45  | 51.325  | 113561 | 2 | 422.73  | -17.13 |
| P0A2B3 RS7_SALTY 30S ribosomal<br>protein S7                                    | 6  |                       | NALAMR                                 | 96  | 6  | 1  | 12.8   | y5                                                                                | 675.36  | 37.070  | 5949   | 1 | 675.36  | 0.99   |
| P0A2B3 RS7_SALTY 30S ribosomal<br>protein S7                                    | 7  |                       | ILPDPK                                 | 11  | 6  | 2  | 12.8   | y4°y4                                                                             | 682.41  | 33.396  | 3061   | 1 | 682.41  | -6.17  |
| P0A2B3 RS7_SALTY 30S ribosomal<br>protein S7                                    | 8  |                       | LANELSDAADNKGTAVK                      | 119 | 17 | 23 | 134.11 | b3*b3b5b7°b7b9y5°y5y9*<br>y9y10*y10y11°y11*y11y12<br>°y12*y12y13y14y15*y15y1<br>6 | 1716.85 | 40.106  | 238959 | 3 | 572.96  | -12.58 |
| P0A2B3 RS7_SALTY 30S ribosomal<br>protein S7                                    | 9  |                       | WIVEAARK                               | 102 | 8  | 3  | 38.4   | b4b5b6                                                                            | 972.56  | 56.832  | 47794  | 2 | 486.78  | -1.95  |
| P0A2B3 RS7_SALTY 30S ribosomal<br>protein S7                                    | 10 |                       | EDVHRMAEANK                            | 138 | 11 | 14 | 105.93 | b5b6b7b8y5°y5y6y7°y7y8<br>*y8y10°y10*y10                                          | 1299.62 | 63.660  | 3507   | 2 | 650.31  | 4.60   |
| P0A2B3 RS7_SALTY 30S ribosomal<br>protein S7                                    | 11 |                       | SELEAFEVALENVRPTVEVKSR                 | 56  | 22 | 5  | 27.27  | b6b8°b8b9b16                                                                      | 2502.33 | 109.741 | 1662   | 3 | 834.78  | 3.12   |
| P65889 PUR7_SALTY<br>Phohoribosylaminoimidazole-<br>succinocarboxamide synthase | 1  |                       | LAEAGIPTQMER                           | 60  | 12 | 8  | 61.07  | b2b3y5y6y8y9y10y12                                                                | 1315.67 | 50.857  | 74131  | 2 | 658.34  | -0.28  |
| P65889 PUR7_SALTY<br>Phohoribosylaminoimidazole-<br>succinocarboxamide synthase | 2  |                       | QSLGGLIEAYEAVHR                        | 215 | 16 | 7  | 37.74  | b3b5b10y1y5y6y16                                                                  | 1713.87 | 85.929  | 50747  | 3 | 571.96  | -10.33 |
| P65889 PUR7_SALTY<br>Phohoribosylaminoimidazole-<br>succinocarboxamide synthase | 3  |                       | TVYSTENPDLLVLEFR                       | 13  | 16 | 10 | 50.09  | b4b11°b11b13y2y3y9y12y<br>13y16                                                   | 1895.99 | 89.314  | 31845  | 2 | 948.50  | 7.28   |
| P65889 PUR7_SALTY<br>Phohoribosylaminoimidazole-<br>succinocarboxamide synthase | 4  |                       | GEVVLGDEFDGSR                          | 184 | 15 | 4  | 16.31  | b9y4y6y15                                                                         | 1563.74 | 95.487  | 1686   | 2 | 782.37  | 7.18   |
| P65889 PUR7_SALTY<br>Phohoribosylaminoimidazole-<br>succinocarboxamide synthase | 5  |                       | LGVEEGMELNPPIFDLFLK                    | 104 | 19 | 3  | 20.44  | b3b5b7                                                                            | 2161.08 | 82.669  | 14801  | 2 | 1081.04 | -20.45 |
| P65889 PUR7_SALTY<br>Phohoribosylaminoimidazole-<br>succinocarboxamide synthase | 6  |                       | LWDK                                   | 199 | 4  | 2  | 11.81  | y3°y3                                                                             | 561.31  | 32.139  | 12283  | 1 | 561.31  | 9.46   |

|                                                                                 |    |                                         |                                   |     |    |    |       |                                               |         |         |       |   |         |        |
|---------------------------------------------------------------------------------|----|-----------------------------------------|-----------------------------------|-----|----|----|-------|-----------------------------------------------|---------|---------|-------|---|---------|--------|
| P65889 PUR7_SALTY<br>Phohoribosylaminoimidazole-<br>succinocarboxamide synthase | 7  |                                         | IEQFDR                            | 39  | 6  | 1  | 12.8  | b4                                            | 807.39  | 110.709 | 2414  | 1 | 807.39  | -9.98  |
| P65889 PUR7_SALTY<br>Phohoribosylaminoimidazole-<br>succinocarboxamide synthase | 8  | Carbamidomethyl+C(9)                    | KLEMPVECVVR                       | 82  | 12 | 13 | 101.2 | b3°b3b4b9°b9y5y6y7°y7y9<br>y10y11°y11         | 1458.78 | 63.650  | 19031 | 2 | 729.89  | -0.08  |
| P65889 PUR7_SALTY<br>Phohoribosylaminoimidazole-<br>succinocarboxamide synthase | 9  |                                         | TVYSTENPDLLVLEFRNDTSAGD<br>GAR    | 13  | 26 | 7  | 29.05 | b6b12b13y5°y5y12y19                           | 2840.35 | 110.157 | 18343 | 3 | 947.45  | -7.22  |
| P65889 PUR7_SALTY<br>Phohoribosylaminoimidazole-<br>succinocarboxamide synthase | 10 |                                         | GEVVLGDEFDGSRLWDK                 | 184 | 19 | 5  | 28.34 | b10b11b13y7y10                                | 2106.00 | 59.965  | 5512  | 2 | 1053.50 | -6.96  |
| P65889 PUR7_SALTY<br>Phohoribosylaminoimidazole-<br>succinocarboxamide synthase | 11 |                                         | NDTSAGDGARIEQFDR                  | 29  | 16 | 6  | 40.91 | b13b14b15°b15y3y6                             | 1751.78 | 72.528  | 4909  | 3 | 584.60  | -7.11  |
| P65889 PUR7_SALTY<br>Phohoribosylaminoimidazole-<br>succinocarboxamide synthase | 12 | Carbamidomethyl+C(8);<br>Oxidation+M(3) | LEMVPVECVVR                       | 83  | 11 | 4  | 33.62 | b5y5y6y8                                      | 1346.70 | 82.860  | 2170  | 3 | 449.57  | 11.87  |
| P0A1P6 GLNA_SALTY Glutamine<br>synthetase                                       | 1  |                                         | AGGVFTDEAIDAYIALR                 | 430 | 17 | 7  | 36.27 | b5b7b10y12y13°y13y17                          | 1781.88 | 77.285  | 94852 | 2 | 891.45  | -12.47 |
| P0A1P6 GLNA_SALTY Glutamine<br>synthetase                                       | 2  |                                         | LVPGYEAPVMLAYSAR                  | 322 | 16 | 10 | 75.7  | b2b15y4y5y7y9y10y11y14<br>y16                 | 1736.92 | 78.372  | 38014 | 2 | 868.96  | 6.89   |
| P0A1P6 GLNA_SALTY Glutamine<br>synthetase                                       | 3  |                                         | AINALANPTTNSYKR                   | 307 | 15 | 5  | 24.39 | y7°y8y10y13y15                                | 1633.87 | 43.759  | 35997 | 3 | 545.29  | 2.54   |
| P0A1P6 GLNA_SALTY Glutamine<br>synthetase                                       | 4  |                                         | AINALANPTTNSYK                    | 307 | 14 | 9  | 88.58 | b4y7y8y9y10y11y12y13y1<br>4                   | 1477.76 | 48.771  | 35606 | 2 | 739.38  | -2.23  |
| P0A1P6 GLNA_SALTY Glutamine<br>synthetase                                       | 5  |                                         | GGYFPVPPVDSAQDIR                  | 177 | 16 | 8  | 38.41 | b12b13°b13y2y5*y5y6y8                         | 1717.86 | 58.222  | 26175 | 3 | 573.29  | 5.68   |
| P0A1P6 GLNA_SALTY Glutamine<br>synthetase                                       | 6  | Carbamidomethyl+C(11)                   | FPDPAANPYLCFAALLMAGLDGIK          | 360 | 24 | 7  | 29.16 | b3b12b14b15°b15y4y6                           | 2565.32 | 136.684 | 17016 | 3 | 855.78  | 11.42  |
| P0A1P6 GLNA_SALTY Glutamine<br>synthetase                                       | 7  |                                         | ATGIADTVLFGPEPEFFLFDDIR           | 117 | 23 | 11 | 38.2  | b2b3°b3b13y12y3y4y5y1<br>2y23                 | 2570.28 | 117.770 | 14671 | 3 | 857.43  | -1.52  |
| P0A1P6 GLNA_SALTY Glutamine<br>synthetase                                       | 8  |                                         | GINESDMVLPDASTAVIDPFFAD<br>STLIIR | 59  | 30 | 17 | 77.37 | b2b3b4b5b9°b9*b9b10b13<br>b24y1y2y3y4y6y11y12 | 3238.62 | 114.080 | 13107 | 3 | 1080.21 | 6.03   |
| P0A1P6 GLNA_SALTY Glutamine<br>synthetase                                       | 9  |                                         | MSAEHVLTMLNEHEVK                  | 0   | 16 | 4  | 15.43 | b7b11°b11y4                                   | 1867.93 | 105.172 | 3384  | 3 | 623.31  | 13.20  |
| P0A1P6 GLNA_SALTY Glutamine<br>synthetase                                       | 10 | Carbamidomethyl+C(19)                   | TATFMPKPMFGDNGSGMHCHMS<br>LAK     | 252 | 25 | 10 | 50.92 | b4b5°b5b6b8y3y6°y6y11y1<br>2                  | 2753.27 | 65.337  | 4448  | 3 | 918.43  | 21.37  |
| P0A1P6 GLNA_SALTY Glutamine<br>synthetase                                       | 11 |                                         | EIPQVAGSLEEALNALDLDR              | 406 | 20 | 4  | 21.14 | b13b14°b14y8                                  | 2153.07 | 109.444 | 3122  | 3 | 718.36  | -16.10 |
| P0A1P6 GLNA_SALTY Glutamine<br>synthetase                                       | 12 |                                         | SAEHVLTMLNEHEVK                   | 1   | 15 | 4  | 16.31 | b3b9y8*y8                                     | 1736.87 | 31.028  | 2976  | 4 | 434.97  | 1.90   |
| P0A1P6 GLNA_SALTY Glutamine<br>synthetase                                       | 13 | Carbamidomethyl+C(11)                   | FPDPAANPYLCFAALLMAGLDGIK<br>NK    | 360 | 26 | 3  | 11.33 | b3b9y11                                       | 2807.42 | 129.336 | 27845 | 3 | 936.48  | -2.26  |
| P0A1P6 GLNA_SALTY Glutamine<br>synthetase                                       | 14 |                                         | FVDLRFTDTK                        | 16  | 10 | 6  | 50.2  | b3°b3b7b8y4y5                                 | 1241.66 | 64.413  | 4405  | 2 | 621.33  | 3.05   |
| P0A1P6 GLNA_SALTY Glutamine<br>synthetase                                       | 15 |                                         | ADEIQIYKYVVHNV AHR                | 232 | 17 | 3  | 23.33 | b6b7b9                                        | 2055.06 | 71.298  | 2272  | 2 | 1028.03 | -7.72  |
| P0A1P6 GLNA_SALTY Glutamine<br>synthetase                                       | 16 |                                         | MSAEHVLTMLNEHEVKFVDLR             | 0   | 21 | 4  | 22.52 | b8b12b13y5                                    | 2498.22 | 59.022  | 1818  | 3 | 833.41  | -14.76 |
| P0A1P6 GLNA_SALTY Glutamine<br>synthetase                                       | 17 | Oxidation+M(9)                          | MSAEHVLTMLNEHEVK                  | 0   | 16 | 3  | 23.8  | y5y11y12                                      | 1883.89 | 81.541  | 1871  | 3 | 628.63  | -5.90  |
| P0A1P6 GLNA_SALTY Glutamine<br>synthetase                                       | 18 |                                         | NALANPTTNSYKR                     | 309 | 13 | 0  | 4.97  |                                               | 1449.75 | 43.761  | 2535  | 2 | 725.38  | 3.62   |
| Q8ZRP4 DAPD_SALTY 2                                                             | 1  |                                         | MQQLQNVIAFER                      | 0   | 14 | 7  | 44.68 | b13y3y7y10*y10y12y14                          | 1706.86 | 86.831  | 93843 | 2 | 853.93  | 2.36   |
| Q8ZRP4 DAPD_SALTY 2                                                             | 2  |                                         | EAVNQVISLLDSGALR                  | 28  | 16 | 12 | 99.76 | b2b6°b6y2y3y4y5y6y7y8y9<br>y10                | 1684.93 | 92.929  | 70446 | 2 | 842.97  | 5.58   |



|                                                    |    |                                           |                                            |     |    |    |        |                                                        |         |         |       |   |         |        |
|----------------------------------------------------|----|-------------------------------------------|--------------------------------------------|-----|----|----|--------|--------------------------------------------------------|---------|---------|-------|---|---------|--------|
| Q8ZRP4 DAPD_SALTY 2                                | 3  |                                           | INDNQVIDGAESR                              | 68  | 13 | 9  | 70.01  | y3°y3y5y6y7°y7y8y9y13                                  | 1430.69 | 42.202  | 58454 | 2 | 715.85  | -0.85  |
| Q8ZRP4 DAPD_SALTY 2                                | 4  |                                           | IDGQWVTHQWLK                               | 48  | 12 | 6  | 20.17  | b5°b5b8°b8y6°y6                                        | 1510.77 | 73.919  | 10345 | 2 | 755.89  | -6.95  |
| Q8ZRP4 DAPD_SALTY 2                                | 5  |                                           | ETGEVHYGR                                  | 217 | 9  | 6  | 63.5   | b3°b3b4y3y5y8                                          | 1047.49 | 58.084  | 2901  | 2 | 524.25  | 2.56   |
| Q8ZRP4 DAPD_SALTY 2                                | 6  |                                           | MQQLQNVIAFERR                              | 0   | 15 | 4  | 24.39  | b5b10b12°b12                                           | 1862.95 | 82.711  | 5433  | 3 | 621.65  | -2.95  |
| Q8ZRP4 DAPD_SALTY 2                                | 7  |                                           | YFDKVPKM                                   | 81  | 8  | 4  | 44.68  | b4b5y3y4                                               | 1027.53 | 83.560  | 1607  | 2 | 514.27  | -2.85  |
| Q8ZRP4 DAPD_SALTY 2                                | 8  | Phohoryl STY(7)                           | IDGQWVTHQWLK                               | 48  | 12 | 5  | 27.38  | b3°b3b5b6°b6                                           | 1590.76 | 101.968 | 2782  | 3 | 530.93  | 14.96  |
| Q8ZRP4 DAPD_SALTY 2                                | 9  | Carbamidomethyl+C(30)<br>;Oxidation+M(20) | NTVLMPSYVNIGAYVDEGTMVD<br>TWATVGSQAQIGK    | 119 | 35 | 11 | 51.09  | b3°b3b5°b5b9b14b15y7°y7<br>y8y9                        | 3763.81 | 96.466  | 11303 | 4 | 941.71  | 12.00  |
| Q8ZRP4 DAPD_SALTY 2                                | 10 | Oxidation+M(1)                            | MQQLQNVIAFER                               | 0   | 14 | 3  | 17.37  | b5y3y6                                                 | 1722.87 | 108.636 | 1759  | 2 | 861.94  | 12.61  |
| P0A2M5 UPP_SALTY Uracil<br>phohoribosyltransferase | 1  |                                           | AGLGMMEGVLENVPSAR                          | 78  | 17 | 9  | 38.36  | b11b13°b13y4y7y12°y12y<br>13y17                        | 1730.87 | 82.672  | 52679 | 2 | 865.94  | 9.31   |
| P0A2M5 UPP_SALTY Uracil<br>phohoribosyltransferase | 2  |                                           | VLVLVAAPEGIAALEK                           | 155 | 16 | 8  | 66.6   | b3b4b5b6b7y2y9y11                                      | 1592.97 | 86.769  | 44019 | 2 | 796.99  | 3.07   |
| P0A2M5 UPP_SALTY Uracil<br>phohoribosyltransferase | 3  |                                           | NEETLEPVVPYFQK                             | 103 | 13 | 3  | 26.11  | y5y7y8                                                 | 1593.79 | 66.367  | 18931 | 2 | 797.40  | 5.59   |
| P0A2M5 UPP_SALTY Uracil<br>phohoribosyltransferase | 4  |                                           | LGLMRENDISTK                               | 14  | 12 | 8  | 24.15  | b2b9y8°y9°y9y10°y10y12                                 | 1376.70 | 60.782  | 18080 | 2 | 688.85  | -13.12 |
| P0A2M5 UPP_SALTY Uracil<br>phohoribosyltransferase | 5  |                                           | ITVVPILR                                   | 70  | 8  | 4  | 38.4   | y4y5y6y8                                               | 910.60  | 70.803  | 14619 | 2 | 455.80  | -10.66 |
| P0A2M5 UPP_SALTY Uracil<br>phohoribosyltransferase | 6  |                                           | ELASEVGSLLTYEATADLETEK                     | 29  | 22 | 5  | 22.13  | b11°b11b14b15y14                                       | 2369.20 | 99.108  | 2742  | 3 | 790.40  | 16.49  |
| P0A2M5 UPP_SALTY Uracil<br>phohoribosyltransferase | 7  |                                           | ELASEVGSLLTYEATADLETEKVT<br>IEGWNGPVEIDQIK | 29  | 38 | 4  | 23.61  | b3b4°b4b6                                              | 4148.03 | 112.579 | 10795 | 4 | 1037.76 | -11.65 |
| P0A2M5 UPP_SALTY Uracil<br>phohoribosyltransferase | 8  |                                           | LGLMRENDISTK                               | 14  | 12 | 4  | 30.39  | b6b8°b8b10                                             | 1376.74 | 67.273  | 7444  | 2 | 688.87  | 12.24  |
| P0A2M5 UPP_SALTY Uracil<br>phohoribosyltransferase | 9  |                                           | NEETLEPVVPYFQKLVSNIDER                     | 103 | 21 | 4  | 21.05  | b11b12°b12y8                                           | 2520.24 | 81.454  | 3918  | 3 | 840.75  | -6.68  |
| P63411 ACKA_SALTY Acetate kinase                   | 1  | Carbamidomethyl+C(19)                     | FAIIDAVNGDEYLSGLAECFHLPE<br>AR             | 17  | 26 | 17 | 76.68  | b2b3b10b15b22y2y3°y3y4<br>y8y10y13y14°y14y19y23y2<br>6 | 2907.39 | 105.196 | 42295 | 3 | 969.80  | -2.44  |
| P63411 ACKA_SALTY Acetate kinase                   | 2  |                                           | EGTRPAVVIPTNEELVIAQDASR                    | 374 | 23 | 13 | 86.77  | b7b8b9b14b15y1y2y5y6y7<br>y8y14y23                     | 2465.30 | 69.988  | 36925 | 3 | 822.44  | -1.09  |
| P63411 ACKA_SALTY Acetate kinase                   | 3  | Carbamidomethyl+C(14)                     | ESGLLGLTEVTSDCR                            | 272 | 15 | 5  | 24.39  | b4b6b12y2y15                                           | 1636.79 | 72.711  | 26633 | 2 | 818.90  | 5.67   |
| P63411 ACKA_SALTY Acetate kinase                   | 4  |                                           | SGDIDPAIFHLHDTLGMSVDQINK                   | 243 | 25 | 3  | 11.5   | b6y7y9                                                 | 2736.36 | 91.628  | 4439  | 3 | 912.79  | -2.77  |
| P63411 ACKA_SALTY Acetate kinase                   | 5  | Carbamidomethyl+C(14)                     | MLNKPVEELNIITCHLGNGGSVSA<br>IR             | 195 | 26 | 4  | 11.33  | b8b16y1y13                                             | 2822.46 | 125.607 | 4162  | 3 | 941.49  | -0.43  |
| P63411 ACKA_SALTY Acetate kinase                   | 6  |                                           | DSASFAPLHNPAHLIGIAEALK                     | 114 | 22 | 3  | 18.77  | b3b9b14                                                | 2272.23 | 87.276  | 31631 | 3 | 758.08  | 9.67   |
| P63411 ACKA_SALTY Acetate kinase                   | 7  |                                           | YTSSVVIDESVIQGIK                           | 98  | 16 | 5  | 32.42  | b3b6°b6b7b12                                           | 1737.91 | 34.151  | 17853 | 4 | 435.23  | -11.73 |
| P63411 ACKA_SALTY Acetate kinase                   | 8  | Carbamidomethyl+C(1)                      | CVDTSMGLTPLEGLVMGTR                        | 224 | 19 | 14 | 107.44 | b3b11b12b14y3°y3y5°y5y8<br>y10y11y13y14y16             | 2036.97 | 95.544  | 2847  | 3 | 679.66  | -5.03  |
| P63411 ACKA_SALTY Acetate kinase                   | 9  |                                           | LDAVVFTGGIGENAAMVR                         | 324 | 18 | 5  | 22.95  | y7°y7y8°y8y14                                          | 1819.92 | 83.608  | 2803  | 2 | 910.46  | -11.40 |
| P63411 ACKA_SALTY Acetate kinase                   | 10 | Carbamidomethyl+C(14)                     | ESGLLGLTEVTSDCRYVEDNYAT<br>K               | 272 | 24 | 3  | 21.01  | b14y5y6                                                | 2720.30 | 112.592 | 4442  | 3 | 907.44  | 9.42   |
| P63411 ACKA_SALTY Acetate kinase                   | 11 |                                           | SGFINKEGTRPAVVIPTNEELVIAQ<br>DASR          | 368 | 29 | 11 | 36.57  | b3°b3b5°b5b9°b9b20y3y6y<br>7y14                        | 3111.61 | 71.104  | 4426  | 4 | 778.66  | -9.26  |
| P63411 ACKA_SALTY Acetate kinase                   | 12 |                                           | IVHGGEKYTSSVVIDESVIQGIK                    | 91  | 23 | 3  | 18.37  | b5b8b11                                                | 2458.31 | 62.513  | 3619  | 3 | 820.11  | -3.87  |
| P63411 ACKA_SALTY Acetate kinase                   | 13 |                                           | LAKYIGSYTALMDGR                            | 309 | 15 | 3  | 24.39  | y5y6y14                                                | 1658.84 | 60.083  | 2725  | 3 | 553.62  | -11.63 |
| P63411 ACKA_SALTY Acetate kinase                   | 14 | Carbamidomethyl+C(4)                      | NGKCVDTSMGLTPLEGLVMGTR                     | 221 | 22 | 8  | 44.44  | b3b5b13b14°b14b15y3y8                                  | 2336.15 | 82.150  | 2601  | 3 | 779.39  | 3.55   |

|                                                              |    |                       |                              |     |    |    |        |                                                            |         |         |       |   |         |        |
|--------------------------------------------------------------|----|-----------------------|------------------------------|-----|----|----|--------|------------------------------------------------------------|---------|---------|-------|---|---------|--------|
| P63411 ACKA_SALTY Acetate kinase                             | 15 | Carbamidomethyl+C(18) | MLTKESGLLGLTEVTSDCR          | 268 | 19 | 7  | 36.14  | b4b5b7°b7y6y9y12                                           | 2110.02 | 92.534  | 2512  | 2 | 1055.52 | -13.19 |
| P63411 ACKA_SALTY Acetate kinase                             | 16 | Phohoryl STY(7)       | LDVVFTGGIGENAAMVR            | 324 | 18 | 4  | 14.03  | b5y7y11*y11                                                | 1899.89 | 108.679 | 6553  | 2 | 950.45  | -3.02  |
| Q7CPL5 RL14_SALTY 50S ribosomal protein L14                  | 1  |                       | MIQEQTMLNVADNSGAR            | 0   | 17 | 13 | 66.77  | b2b3b13y6y7y8y9*y9y12y14°y14*y14y17                        | 1877.90 | 59.972  | 91705 | 2 | 939.45  | 8.78   |
| Q7CPL5 RL14_SALTY 50S ribosomal protein L14                  | 2  | Carbamidomethyl+C(6)  | FDGNACVILNNNSEQPIGTR         | 78  | 20 | 6  | 19.8   | b2y3y7°y7y10y20                                            | 2219.08 | 60.114  | 14405 | 2 | 1110.04 | 12.65  |
| Q7CPL5 RL14_SALTY 50S ribosomal protein L14                  | 3  |                       | IISLAPEVL                    | 114 | 9  | 3  | 35.89  | y4y5y7                                                     | 954.58  | 86.263  | 77719 | 1 | 954.58  | -9.02  |
| Q7CPL5 RL14_SALTY 50S ribosomal protein L14                  | 4  |                       | IQEQTMLNVADNSGAR             | 1   | 16 | 10 | 48.66  | b6°b6*b6y5y6°y6y10y12y13°y13                               | 1746.86 | 64.402  | 12750 | 3 | 582.96  | 8.25   |
| Q7CPL5 RL14_SALTY 50S ribosomal protein L14                  | 5  |                       | IQEQTMLNVADNSGARR            | 1   | 17 | 15 | 47.28  | b5°b5*b5b7°b7b9°b9y3y6°y6y9*y9y10°y10*y10                  | 1902.93 | 64.444  | 20283 | 4 | 476.49  | -7.44  |
| Q7CPL5 RL14_SALTY 50S ribosomal protein L14                  | 6  |                       | MIQEQTMLNVADNSGARR           | 0   | 18 | 8  | 44.84  | b4b6b12y8y11y13*y13y14                                     | 2034.00 | 105.330 | 2041  | 2 | 1017.51 | 8.76   |
| P0A1A5 ILVE_SALTY Branched-chain-amino-acid aminotransferase | 1  |                       | AAPNTIPTAAK                  | 149 | 11 | 7  | 33.62  | b4y2y5y8y9*y9y11                                           | 1054.58 | 33.183  | 27259 | 2 | 527.79  | -7.52  |
| P0A1A5 ILVE_SALTY Branched-chain-amino-acid aminotransferase | 2  |                       | SVDGIQVGEGR                  | 266 | 11 | 9  | 32.19  | b2°b2b3b10y6*y6y9*y9y11                                    | 1116.56 | 42.333  | 25552 | 2 | 558.79  | 0.44   |
| P0A1A5 ILVE_SALTY Branched-chain-amino-acid aminotransferase | 3  |                       | AGGNYLSSSLVGSEARR            | 160 | 17 | 5  | 38.11  | b5b7b8b9y6                                                 | 1749.90 | 73.947  | 20590 | 3 | 583.97  | -11.79 |
| P0A1A5 ILVE_SALTY Branched-chain-amino-acid aminotransferase | 4  |                       | IQQAFFGLFTGETEDK             | 284 | 16 | 13 | 86.65  | b2*b2b6b12y4y6y8y9°y9y10y11y13°y13                         | 1830.89 | 94.414  | 17861 | 2 | 915.95  | -1.87  |
| P0A1A5 ILVE_SALTY Branched-chain-amino-acid aminotransferase | 5  |                       | ESLYLADEVFMSGTAAEITPVR       | 244 | 22 | 5  | 18.77  | b2b8b12°b12b15                                             | 2399.18 | 118.728 | 9140  | 3 | 800.40  | -0.81  |
| P0A1A5 ILVE_SALTY Branched-chain-amino-acid aminotransferase | 6  |                       | VHVMShALHYGTSVFEGIR          | 22  | 19 | 4  | 22.66  | b1y4y13y14                                                 | 2140.09 | 86.018  | 1798  | 3 | 714.03  | 6.27   |
| P0A1A5 ILVE_SALTY Branched-chain-amino-acid aminotransferase | 7  |                       | ADYIWFNGEMVR                 | 5   | 12 | 5  | 33.15  | b3b4y5°y5y7                                                | 1500.72 | 69.496  | 5089  | 3 | 500.91  | 17.16  |
| P0A1A5 ILVE_SALTY Branched-chain-amino-acid aminotransferase | 8  |                       | WEDAKVHVMShALHYGTSVFEGIR     | 17  | 24 | 3  | 21.01  | b8y11y12                                                   | 2769.32 | 119.885 | 59972 | 3 | 923.78  | -12.78 |
| P0A1A5 ILVE_SALTY Branched-chain-amino-acid aminotransferase | 9  |                       | AGGNYLSSSLVGSEARR            | 160 | 17 | 4  | 27.36  | b3b6y5y6                                                   | 1749.92 | 114.116 | 22827 | 2 | 875.46  | -1.60  |
| P0A1A5 ILVE_SALTY Branched-chain-amino-acid aminotransferase | 10 |                       | RHGYQEGIALDVNGYISEGAGENLFEVK | 176 | 28 | 4  | 15.78  | b4b8b10y10                                                 | 3065.50 | 136.489 | 6009  | 2 | 1533.25 | 0.08   |
| P0A1A5 ILVE_SALTY Branched-chain-amino-acid aminotransferase | 11 | Carbamidomethyl+C(12) | SVDGIQVGEGRCPVTK             | 266 | 17 | 6  | 30.53  | b3b15y3y10y11°y11                                          | 1758.89 | 77.468  | 4515  | 2 | 879.95  | 3.05   |
| P0A1A5 ILVE_SALTY Branched-chain-amino-acid aminotransferase | 12 | Carbamidomethyl+C(20) | VHVMShALHYGTSVFEGIRCYDSHK    | 22  | 25 | 3  | 17.73  | b4b9b12                                                    | 2930.40 | 88.480  | 2422  | 4 | 733.36  | 5.67   |
| P0A1A5 ILVE_SALTY Branched-chain-amino-acid aminotransferase | 13 | Oxidation+M(4)        | VHVMShALHYGTSVFEGIR          | 22  | 19 | 4  | 23.5   | b4b12b13y14                                                | 2156.06 | 76.128  | 82273 | 3 | 719.36  | -3.74  |
| P0A1A5 ILVE_SALTY Branched-chain-amino-acid aminotransferase | 14 | Oxidation+M(11)       | ESLYLADEVFMSGTAAEITPVR       | 244 | 22 | 6  | 27.27  | b6°b6b9b11b12°b12                                          | 2415.19 | 63.673  | 2659  | 4 | 604.55  | 6.97   |
| P67617 FETP_SALTY Probable Fe(2+)-trafficking protein        | 1  |                       | QTMLINEK                     | 45  | 8  | 6  | 45.93  | b7y3y4y5y8*y8                                              | 976.51  | 42.239  | 21879 | 2 | 488.76  | -2.00  |
| P67617 FETP_SALTY Probable Fe(2+)-trafficking protein        | 2  | Carbamidomethyl+C(4)  | TIFCTYLQRDAEGQDFQLYPGELGK    | 3   | 25 | 5  | 24.67  | b4b7b11b13y11                                              | 2949.45 | 122.736 | 2494  | 3 | 983.82  | 14.07  |
| P67617 FETP_SALTY Probable Fe(2+)-trafficking protein        | 3  | Carbamidomethyl+C(4)  | TIFCTYLQR                    | 3   | 9  | 8  | 74.05  | b4b7°b7y3y5°y5y7y8                                         | 1201.61 | 65.362  | 49773 | 2 | 601.31  | 1.42   |
| P67617 FETP_SALTY Probable Fe(2+)-trafficking protein        | 4  |                       | DVHIEGYTPEDK                 | 78  | 12 | 8  | 65.8   | b4°b4b6b7y3y5y8y9                                          | 1402.67 | 136.408 | 7378  | 1 | 1402.67 | 15.75  |
| P67617 FETP_SALTY Probable Fe(2+)-trafficking protein        | 5  |                       | LLEQEMVVSFLFEGK              | 64  | 14 | 4  | 22.81  | b7b8y9°y9                                                  | 1669.85 | 79.401  | 3008  | 2 | 835.43  | -2.19  |
| P67617 FETP_SALTY Probable Fe(2+)-trafficking protein        | 6  |                       | IYNEISKDAWQWQHK              | 29  | 16 | 22 | 123.86 | b3*b3b4b5b8b9°b9°b9b10°b10°b10b11y4*y4y5y6*y6y8*y8y9°y9*y9 | 2017.02 | 63.680  | 3070  | 2 | 1009.01 | 13.98  |

|                                                       |    |                                       |                             |     |    |    |        |                                                                  |         |         |        |   |         |        |
|-------------------------------------------------------|----|---------------------------------------|-----------------------------|-----|----|----|--------|------------------------------------------------------------------|---------|---------|--------|---|---------|--------|
| P67617 FETP_SALTY Probable Fe(2+)-trafficking protein | 7  |                                       | QTMLINEK                    | 45  | 8  | 0  | 1.49   |                                                                  | 958.49  | 42.233  | 2100   | 2 | 479.75  | -4.01  |
| Q7CPL7 RL17_SALTY 50S ribosomal protein L17           | 1  |                                       | LFNELGPR                    | 78  | 8  | 6  | 53.71  | b2y3y4y6y7y8                                                     | 945.50  | 56.027  | 217071 | 2 | 473.26  | -13.04 |
| Q7CPL7 RL17_SALTY 50S ribosomal protein L17           | 2  |                                       | NMAGSLVR                    | 22  | 8  | 12 | 58.24  | b2*b2b7*b7y2y3y5y6*y6y7y8*y8                                     | 847.43  | 41.766  | 79454  | 2 | 424.22  | -12.82 |
| Q7CPL7 RL17_SALTY 50S ribosomal protein L17           | 3  |                                       | VVEPLITLAK                  | 46  | 10 | 7  | 36.93  | b2b3y1y4y7y8y10                                                  | 1082.68 | 70.108  | 42140  | 2 | 541.84  | -4.28  |
| Q7CPL7 RL17_SALTY 50S ribosomal protein L17           | 4  |                                       | TRDNEIVAK                   | 69  | 9  | 7  | 35.89  | b1b2*b2b4b5b6y1                                                  | 1045.55 | 20.642  | 5916   | 2 | 523.28  | -9.11  |
| Q7CPL7 RL17_SALTY 50S ribosomal protein L17           | 5  |                                       | AGGYTR                      | 90  | 6  | 1  | 12.8   | b3                                                               | 624.31  | 89.762  | 12775  | 1 | 624.31  | -3.32  |
| Q7CPL7 RL17_SALTY 50S ribosomal protein L17           | 6  |                                       | AGDNAPMAYIELVDR             | 103 | 15 | 4  | 29.07  | b12b13y5y9                                                       | 1634.81 | 54.694  | 2225   | 3 | 545.61  | 17.77  |
| Q7CPL7 RL17_SALTY 50S ribosomal protein L17           | 7  |                                       | RVVEPLITLAK                 | 45  | 11 | 4  | 38.21  | b3b4y4y5                                                         | 1238.78 | 63.175  | 158407 | 2 | 619.89  | -2.76  |
| Q7CPL7 RL17_SALTY 50S ribosomal protein L17           | 8  |                                       | AGDNAPMAYIELVDRSEK          | 103 | 18 | 3  | 21.19  | y3y5y13                                                          | 1978.95 | 73.978  | 12314  | 3 | 660.32  | -4.38  |
| Q7CPL7 RL17_SALTY 50S ribosomal protein L17           | 9  |                                       | NMAGSLVR                    | 22  | 8  | 0  | 1.49   |                                                                  | 830.41  | 41.766  | 5890   | 2 | 415.71  | -5.81  |
| P66193 RL31B_SALTY 50S ribosomal protein L31 type B   | 1  |                                       | TFDSESSAAR                  | 62  | 10 | 11 | 81.62  | b2b3y1y3y5y6y7y8*y8y9y10                                         | 1070.47 | 25.895  | 77068  | 2 | 535.74  | -6.39  |
| P66193 RL31B_SALTY 50S ribosomal protein L31 type B   | 2  |                                       | EIELDGVITYPYVTIDVSSK        | 33  | 19 | 3  | 21.26  | b7y11y12                                                         | 2128.08 | 85.695  | 10217  | 2 | 1064.55 | 6.77   |
| P66193 RL31B_SALTY 50S ribosomal protein L31 type B   | 3  |                                       | TVVFHDTSANEYVK              | 10  | 14 | 24 | 187.52 | b3*b3b5b6b10b11b12y3y4*y4y5*y5y6y7y8*y8y9*y9*y9y10*y10*y10y11y12 | 1609.76 | 47.836  | 385612 | 3 | 537.26  | -16.46 |
| P66193 RL31B_SALTY 50S ribosomal protein L31 type B   | 4  |                                       | MKPDHPVYR                   | 0   | 10 | 4  | 24.62  | b6*b6y6y9                                                        | 1255.65 | 43.300  | 1556   | 2 | 628.33  | -8.26  |
| P66193 RL31B_SALTY 50S ribosomal protein L31 type B   | 5  |                                       | VGSTIKTER                   | 24  | 9  | 4  | 54.21  | y3y4y6y8                                                         | 990.55  | 19.142  | 38379  | 2 | 495.78  | -6.90  |
| P66193 RL31B_SALTY 50S ribosomal protein L31 type B   | 6  |                                       | EIELDGVITYPYVTIDVSSKSHPFYTG | 33  | 27 | 12 | 62.17  | b7b8*b8b9*b9b10b16y3y6y8y9*y9                                    | 3073.54 | 122.792 | 3577   | 3 | 1025.18 | 7.63   |
| P65692 K6PF_SALTY 6-phohofructokinase                 | 1  |                                       | IGVLTSGGDAPGMNAAIR          | 4   | 18 | 11 | 72.22  | b3b10y2y8*y8y9y10y12y13y14y18                                    | 1699.88 | 63.129  | 36544  | 2 | 850.45  | 2.44   |
| P65692 K6PF_SALTY 6-phohofructokinase                 | 2  |                                       | GGTFLGSAR                   | 64  | 9  | 3  | 28.11  | b3b4y5                                                           | 865.46  | 48.467  | 23209  | 2 | 433.23  | 6.77   |
| P65692 K6PF_SALTY 6-phohofructokinase                 | 3  | Carbamidomethyl+C(11)                 | HAIVAITEHMCVDDELAHFIEK      | 215 | 22 | 4  | 12.26  | b12*b12b19y12                                                    | 2578.22 | 87.300  | 5107   | 2 | 1289.61 | -8.33  |
| P65692 K6PF_SALTY 6-phohofructokinase                 | 4  | Carbamidomethyl+C(8)                  | LTEMGFPCIGLPGTIDNDIK        | 112 | 20 | 3  | 13.01  | b12b14y13                                                        | 2191.08 | 82.706  | 8553   | 3 | 731.03  | 0.33   |
| P65692 K6PF_SALTY 6-phohofructokinase                 | 5  |                                       | MVQLDR                      | 49  | 6  | 1  | 12.8   | b4                                                               | 761.39  | 96.517  | 4965   | 1 | 761.39  | -4.41  |
| P65692 K6PF_SALTY 6-phohofructokinase                 | 6  | Carbamidomethyl+C(1)                  | CVGIQNEQLVHHDIIDAENMK       | 283 | 22 | 3  | 12.26  | b8y5y13                                                          | 2576.22 | 93.494  | 4956   | 2 | 1288.61 | -15.73 |
| P65692 K6PF_SALTY 6-phohofructokinase                 | 7  |                                       | MGAYAIDLLLEGHGGR            | 267 | 16 | 4  | 37.19  | y3y4y5y8                                                         | 1672.81 | 84.267  | 4813   | 3 | 558.28  | -21.16 |
| P65692 K6PF_SALTY 6-phohofructokinase                 | 8  |                                       | GIDALVVIGGDGSYMGAK          | 93  | 18 | 3  | 14.03  | b13y4y12                                                         | 1722.88 | 92.980  | 4552   | 2 | 861.94  | 3.40   |
| P65692 K6PF_SALTY 6-phohofructokinase                 | 9  |                                       | DTSSSHQRISIVEVMGR           | 155 | 17 | 3  | 14.67  | b4b9y4                                                           | 1901.97 | 87.293  | 8649   | 2 | 951.49  | 10.27  |
| P65692 K6PF_SALTY 6-phohofructokinase                 | 10 |                                       | GGTFLGSARFPEFR              | 64  | 14 | 5  | 48.66  | b4b5b6b7y5                                                       | 1541.77 | 43.176  | 4640   | 2 | 771.39  | -8.63  |
| P65692 K6PF_SALTY 6-phohofructokinase                 | 11 |                                       | GVVRAALTEGLEVMGIYDGYLGLYEDR | 22  | 27 | 4  | 34.8   | y6y12y13y14                                                      | 2959.46 | 135.424 | 1697   | 2 | 1480.23 | -9.65  |
| P65692 K6PF_SALTY 6-phohofructokinase                 | 12 | Carbamidomethyl+C(11);Oxidation+M(10) | HAIVAITEHMCVDDELAHFIEKETGR  | 215 | 26 | 5  | 14.07  | b3b13y6*y6y12                                                    | 3037.43 | 98.927  | 2802   | 2 | 1519.22 | -5.87  |

|                                                                               |    |                       |                                      |     |    |    |       |                                                      |         |         |       |   |         |        |
|-------------------------------------------------------------------------------|----|-----------------------|--------------------------------------|-----|----|----|-------|------------------------------------------------------|---------|---------|-------|---|---------|--------|
| Q7CQC4 CMOA_SALTY tRNA (cmo5U34)-methyltransferase                            | 1  |                       | DITIENASMVVLNFTLQFLEPAER             | 119 | 24 | 15 | 30.59 | b2b3°b3b6°b6b7°b7y2°y2y4°y4y6y7°y8°y8                | 2750.38 | 136.390 | 7281  | 2 | 1375.69 | -10.03 |
| Q7CQC4 CMOA_SALTY tRNA (cmo5U34)-methyltransferase                            | 2  | Carbamidomethyl+C(13) | FVQPNTQVYDLGCSLGAATLSVR              | 52  | 23 | 4  | 21.8  | b9y12y14y15                                          | 2496.29 | 98.093  | 4686  | 3 | 832.77  | 14.77  |
| Q7CQC4 CMOA_SALTY tRNA (cmo5U34)-methyltransferase                            | 3  |                       | DTLFSAPIAR                           | 4   | 10 | 3  | 26.38 | b6b7y5                                               | 1090.58 | 46.470  | 2091  | 3 | 364.20  | -5.93  |
| Q7CQC4 CMOA_SALTY tRNA (cmo5U34)-methyltransferase                            | 4  |                       | APTPVEVVEGDIR                        | 106 | 13 | 3  | 18.63 | b4b9y6                                               | 1381.73 | 72.473  | 6178  | 3 | 461.25  | -0.18  |
| Q7CQC4 CMOA_SALTY tRNA (cmo5U34)-methyltransferase                            | 5  |                       | IIAVDNAMIER                          | 84  | 13 | 4  | 38.42 | b7b9b11b12                                           | 1428.77 | 66.030  | 4169  | 2 | 714.89  | 15.38  |
| Q7CQC4 CMOA_SALTY tRNA (cmo5U34)-methyltransferase                            | 6  |                       | HIDAYK                               | 100 | 6  | 2  | 12.8  | y4°y4                                                | 746.37  | 34.256  | 1885  | 2 | 373.69  | -13.33 |
| Q7CQC4 CMOA_SALTY tRNA (cmo5U34)-methyltransferase                            | 7  |                       | MSHRDTLFSAPIAR                       | 0   | 14 | 5  | 25.94 | b4b10°b10b12°b12                                     | 1601.84 | 64.407  | 2718  | 2 | 801.42  | 13.03  |
| Q7CQC4 CMOA_SALTY tRNA (cmo5U34)-methyltransferase                            | 8  | Oxidation+M(8)        | VAEVFPDMIQR                          | 23  | 11 | 6  | 25.12 | b6y7°y7y8°y8°y8                                      | 1320.68 | 74.886  | 4641  | 3 | 440.90  | 13.03  |
| P02936 OMPA_SALTY Outer membrane protein A                                    | 1  | Carbamidomethyl+C(6)  | AALIDCLAPDR                          | 321 | 11 | 11 | 59.99 | b1b2b3b8°b8b10y1y3y7y8y11                            | 1214.62 | 62.803  | 57033 | 2 | 607.81  | 0.70   |
| P02936 OMPA_SALTY Outer membrane protein A                                    | 2  | Carbamidomethyl+C(13) | GMGESNPVTGNTCDNVKPR                  | 302 | 19 | 14 | 79.06 | b3b4y1y2y5y8°y8y10y11*y11y13y14y17y19                | 2032.90 | 38.687  | 46411 | 3 | 678.31  | -7.15  |
| P02936 OMPA_SALTY Outer membrane protein A                                    | 3  |                       | SNVPGGPSTKDHD TG VVFAGGIE YAITPEIATR | 128 | 35 | 4  | 10.95 | b7b16°b16y11                                         | 3540.77 | 96.501  | 13027 | 4 | 885.95  | 1.38   |
| P02936 OMPA_SALTY Outer membrane protein A                                    | 4  |                       | AQGVQLTAK                            | 94  | 9  | 3  | 28.11 | b3y5y6                                               | 915.52  | 26.903  | 30985 | 2 | 458.26  | -5.40  |
| P02936 OMPA_SALTY Outer membrane protein A                                    | 5  |                       | GIPSDK                               | 292 | 6  | 1  | 12.8  | y4                                                   | 616.34  | 32.500  | 12652 | 1 | 616.34  | 9.41   |
| P02936 OMPA_SALTY Outer membrane protein A                                    | 6  |                       | DNTWYAGAK                            | 24  | 9  | 4  | 49.95 | b3y3y5y7                                             | 1025.48 | 64.412  | 4706  | 2 | 513.24  | 11.43  |
| P02936 OMPA_SALTY Outer membrane protein A                                    | 7  |                       | SNVPGGPSTK                           | 128 | 10 | 6  | 44.71 | b4b6°b6b8°b8y6                                       | 943.47  | 63.727  | 2663  | 1 | 943.47  | -13.46 |
| P02936 OMPA_SALTY Outer membrane protein A                                    | 8  |                       | DVVTQPQA                             | 342 | 8  | 7  | 38.4  | y3*y3y4*y4y5°y5*y5                                   | 857.43  | 122.857 | 2266  | 1 | 857.43  | -12.17 |
| P02936 OMPA_SALTY Outer membrane protein A                                    | 9  |                       | FGQQEAAPVVAPAPAPEVQTK                | 194 | 23 | 3  | 11.96 | b7y10y12                                             | 2303.21 | 54.683  | 2044  | 2 | 1152.11 | 2.23   |
| P02936 OMPA_SALTY Outer membrane protein A                                    | 10 |                       | DHD TG VVFAGGIE YAITPEIATR           | 138 | 25 | 3  | 21.04 | b13y5y6                                              | 2616.28 | 107.217 | 1502  | 2 | 1308.64 | -5.60  |
| P02936 OMPA_SALTY Outer membrane protein A                                    | 11 |                       | AQGVQLTAKLGYPITDDLDVYTR              | 94  | 23 | 4  | 20.99 | b3b4°b4y3                                            | 2537.30 | 125.728 | 12344 | 3 | 846.44  | -8.56  |
| P02936 OMPA_SALTY Outer membrane protein A                                    | 12 | Carbamidomethyl+C(17) | ISARGMGESNPVTGNTCDNVKPR              | 298 | 23 | 3  | 11.96 | b8y8y15                                              | 2460.20 | 70.698  | 11226 | 3 | 820.74  | 10.52  |
| P02936 OMPA_SALTY Outer membrane protein A                                    | 13 |                       | DGSVVVLGFTDRIGSDAYNQGLS EK           | 255 | 25 | 3  | 11.5  | b13b23y10                                            | 2627.28 | 67.312  | 9644  | 4 | 657.58  | -5.48  |
| P02936 OMPA_SALTY Outer membrane protein A                                    | 14 |                       | LGYPITDDLDVYTRLGGMVWR                | 103 | 21 | 13 | 91.99 | b8b9b10b11°b11b12°b12y5y6y9y10y12°y12                | 2440.24 | 64.425  | 5498  | 3 | 814.08  | 1.60   |
| P02936 OMPA_SALTY Outer membrane protein A                                    | 15 |                       | ADTKSNVPGGPSTK                       | 124 | 14 | 4  | 24.74 | b8b10y9y13                                           | 1358.69 | 68.369  | 2047  | 2 | 679.85  | -3.14  |
| P69936 YDFG_SALTY NADP-dependent L-serine/L-allo-threonine dehydrogenase ydfG | 1  |                       | VTDIEPGLVGGTEFSSVR                   | 171 | 18 | 11 | 55.81 | b2b3°b3b5y7y8y9y13y14°y14y18                         | 1862.96 | 70.138  | 29607 | 2 | 931.98  | 5.96   |
| P69936 YDFG_SALTY NADP-dependent L-serine/L-allo-threonine dehydrogenase ydfG | 2  |                       | GHIINIGSTAGSWPYAGGNVYGAT K           | 126 | 25 | 18 | 67.08 | b2b13°b13b14°b14y2y3y4y5y8y9°y9*y9y11*y11y13°y13*y13 | 2491.27 | 66.082  | 18549 | 4 | 623.57  | 14.11  |
| P69936 YDFG_SALTY NADP-dependent L-serine/L-allo-threonine dehydrogenase ydfG | 3  |                       | ASVEDWETMIDTNNK                      | 93  | 15 | 3  | 24.39 | y7y8y10                                              | 1752.78 | 79.521  | 4400  | 3 | 584.93  | 1.32   |
| P69936 YDFG_SALTY NADP-dependent L-serine/L-allo-threonine dehydrogenase ydfG | 4  |                       | AVLPGMVER                            | 115 | 9  | 3  | 35.89 | y4y6y7                                               | 971.53  | 53.970  | 30651 | 2 | 486.27  | -8.67  |

|                                                                                |    |                                        |                                                    |     |    |    |        |                                                |         |         |        |   |         |        |
|--------------------------------------------------------------------------------|----|----------------------------------------|----------------------------------------------------|-----|----|----|--------|------------------------------------------------|---------|---------|--------|---|---------|--------|
| [P69936 YDFG_SALTY NADP-dependent L-serine/L-allo-threonine dehydrogenase ydfG | 5  |                                        | TYENTTALTPEDITEAVWWVATL PAHVNINTVEMMPVTQSFAGLSV HR | 199 | 48 | 7  | 23.67  | b3b8b13°b13b14b27y6                            | 5340.69 | 136.509 | 10240  | 4 | 1335.93 | 10.24  |
| [P69936 YDFG_SALTY NADP-dependent L-serine/L-allo-threonine dehydrogenase ydfG | 6  |                                        | TDLHGTA VR                                         | 162 | 9  | 3  | 35.89  | y4y5y6                                         | 969.50  | 24.221  | 9339   | 2 | 485.25  | -10.14 |
| [P69936 YDFG_SALTY NADP-dependent L-serine/L-allo-threonine dehydrogenase ydfG | 7  |                                        | DIDVLVNNAGLALGLEPAHK                               | 73  | 20 | 8  | 42.78  | b4b6b7°b7b9b11y3y7                             | 2059.08 | 90.774  | 6582   | 3 | 687.03  | -19.56 |
| [P69936 YDFG_SALTY NADP-dependent L-serine/L-allo-threonine dehydrogenase ydfG | 8  | Carbamidomethyl+C(15)                  | MIVLVTGATAGFGECIAR                                 | 0   | 18 | 3  | 14.03  | b14y5y16                                       | 1865.97 | 95.502  | 6285   | 2 | 933.49  | 5.43   |
| [P69936 YDFG_SALTY NADP-dependent L-serine/L-allo-threonine dehydrogenase ydfG | 9  |                                        | NRAAIEEMMASLPAQWR                                  | 56  | 17 | 3  | 14.67  | b6b12y8                                        | 1973.94 | 82.165  | 1785   | 4 | 494.24  | -12.68 |
| [P69936 YDFG_SALTY NADP-dependent L-serine/L-allo-threonine dehydrogenase ydfG | 10 | Carbamidomethyl+C(15) ;Phohoryl STY(9) | MIVLVTGATAGFGECIARR                                | 0   | 19 | 5  | 29.22  | y7_HPO3 y6y7y9°y9y12                           | 2102.04 | 66.041  | 8021   | 5 | 421.21  | 9.87   |
| [P69936 YDFG_SALTY NADP-dependent L-serine/L-allo-threonine dehydrogenase ydfG | 11 | Carbamidomethyl+C(15) ;Oxidation+M(1)  | MIVLVTGATAGFGECIAR                                 | 0   | 18 | 6  | 42.11  | b16y3y6y8y9y11                                 | 1881.96 | 120.684 | 21037  | 2 | 941.48  | 3.18   |
| [Q7CPP7 RL21_SALTY 50S ribosomal protein L21                                   | 1  |                                        | MYAVFQSGGK                                         | 0   | 10 | 8  | 57.01  | b2b3y3y4°y4y7y8y10                             | 1087.52 | 53.369  | 68841  | 2 | 544.26  | -5.28  |
| [Q7CPP7 RL21_SALTY 50S ribosomal protein L21                                   | 2  |                                        | VSEGTQTVR                                          | 13  | 8  | 3  | 38.4   | y5y6y7                                         | 875.46  | 16.986  | 1854   | 2 | 438.23  | -3.21  |
| [Q7CPP7 RL21_SALTY 50S ribosomal protein L21                                   | 3  |                                        | IGVPFVDGGVIK                                       | 48  | 12 | 3  | 27.38  | y5y6y9                                         | 1200.69 | 77.704  | 42395  | 2 | 600.85  | -3.97  |
| [Q7CPP7 RL21_SALTY 50S ribosomal protein L21                                   | 4  |                                        | LDIATGETIEFAEVLMIANGEEVK                           | 24  | 24 | 8  | 28.81  | b3b14y4°y4y8*y8y10y14                          | 2592.26 | 117.775 | 26262  | 3 | 864.76  | -17.99 |
| [Q7CPP7 RL21_SALTY 50S ribosomal protein L21                                   | 5  |                                        | YAVFQSGGK                                          | 1   | 9  | 3  | 28.11  | b5y3y6                                         | 956.46  | 90.752  | 4038   | 1 | 956.46  | -21.31 |
| [Q7CPP7 RL21_SALTY 50S ribosomal protein L21                                   | 6  |                                        | QWFTDVK                                            | 90  | 7  | 3  | 37.9   | y3y5y6                                         | 923.44  | 114.154 | 1578   | 1 | 923.44  | -19.89 |
| [Q7CPP7 RL21_SALTY 50S ribosomal protein L21                                   | 7  |                                        | MYAVFQSGGKQHR                                      | 0   | 13 | 4  | 26.11  | b3b4b10*b10                                    | 1508.72 | 41.817  | 3112   | 3 | 503.58  | -13.67 |
| [Q7CPP7 RL21_SALTY 50S ribosomal protein L21                                   | 8  | Oxidation+M(16)                        | LDIATGETIEFAEVLMIANGEEVK                           | 24  | 24 | 5  | 24.25  | b10°b10b11y6y12                                | 2608.31 | 77.072  | 6948   | 4 | 652.83  | -0.19  |
| [P67904 RS10_SALTY 30S ribosomal protein S10                                   | 1  |                                        | LIDQSTAEIVETAK                                     | 16  | 14 | 18 | 131.32 | b2b3b7°b7b9b10y2y3y4y5 y6y8y9y10y12°y12*y12y14 | 1517.80 | 56.296  | 159798 | 2 | 759.41  | -1.45  |
| [P67904 RS10_SALTY 30S ribosomal protein S10                                   | 2  |                                        | LVDIVEPTEK                                         | 72  | 10 | 12 | 76.3   | b2y2°y2y3y4y5°y5y6°y6y8 y9y10                  | 1142.62 | 52.723  | 76820  | 2 | 571.81  | -6.84  |
| [P67904 RS10_SALTY 30S ribosomal protein S10                                   | 3  |                                        | GPIPLPTRK                                          | 37  | 9  | 6  | 42.17  | b2b3y4y5y6y9                                   | 978.60  | 44.150  | 55017  | 2 | 489.80  | -7.67  |
| [P67904 RS10_SALTY 30S ribosomal protein S10                                   | 4  |                                        | DARDQYEIR                                          | 59  | 9  | 5  | 28.11  | b8y4°y4y8y9                                    | 1165.56 | 45.957  | 10160  | 2 | 583.28  | 1.05   |
| [P67904 RS10_SALTY 30S ribosomal protein S10                                   | 5  |                                        | FTVLIHVNKDAR                                       | 48  | 14 | 4  | 32.93  | y2y6y7y8                                       | 1596.88 | 54.756  | 5756   | 2 | 798.94  | -3.29  |
| [P67904 RS10_SALTY 30S ribosomal protein S10                                   | 6  |                                        | FTVLIHV N K                                        | 48  | 11 | 3  | 29.1   | y4y6y7                                         | 1254.70 | 59.331  | 52376  | 3 | 418.90  | -17.90 |
| [P67904 RS10_SALTY 30S ribosomal protein S10                                   | 7  |                                        | MQNQ R                                             | 0   | 5  | 1  | 12.3   | y4                                             | 676.32  | 107.124 | 1733   | 1 | 676.32  | 5.60   |
| [P67904 RS10_SALTY 30S ribosomal protein S10                                   | 8  |                                        | RLVDIVEPTEK                                        | 71  | 11 | 5  | 61.49  | b3b4b5b6b7                                     | 1298.73 | 52.353  | 79682  | 2 | 649.87  | -0.85  |
| [P67904 RS10_SALTY 30S ribosomal protein S10                                   | 9  |                                        | LIDQSTAEIVETAKR                                    | 16  | 15 | 5  | 26.7   | b6b10b12y13*y13                                | 1673.90 | 113.359 | 1801   | 2 | 837.45  | -5.32  |
| [P67904 RS10_SALTY 30S ribosomal protein S10                                   | 10 |                                        | IPLPTRK                                            | 39  | 7  | 0  | 1.99   |                                                | 824.53  | 44.155  | 10335  | 2 | 412.77  | -9.40  |

|                                                |    |                       |                                    |     |    |    |        |                                          |         |         |       |   |         |        |
|------------------------------------------------|----|-----------------------|------------------------------------|-----|----|----|--------|------------------------------------------|---------|---------|-------|---|---------|--------|
| [P67904]RS10_SALTY 30S ribosomal protein S10   | 11 |                       | DIVEPTEK                           | 74  | 8  | 2  | 19.31  | b5b7                                     | 930.47  | 52.764  | 3035  | 1 | 930.47  | -7.87  |
| [P65882]PURA_SALTY Adenylosuccinate synthetase | 1  | Carbamidomethyl+C(19) | VGAGPFPTELFDETGEFLCK               | 273 | 20 | 11 | 42.78  | b1b4b6b9b11°b11b12y2y5y10y20             | 2214.07 | 100.837 | 24229 | 2 | 1107.54 | 12.24  |
| [P65882]PURA_SALTY Adenylosuccinate synthetase | 2  |                       | VLDDTMAVADILTSMVVDVSDLLDQAR        | 186 | 27 | 17 | 113.97 | b2b5b6b7b8b11b13°b13y1y3y4y5y6y8y9y10y27 | 2905.45 | 138.435 | 16511 | 3 | 969.16  | 0.00   |
| [P65882]PURA_SALTY Adenylosuccinate synthetase | 3  |                       | GVEPIYETMPGWSESTFGVKDR             | 367 | 22 | 6  | 25.95  | b3b4b8y9y12°y12                          | 2485.17 | 70.188  | 13639 | 3 | 829.06  | -0.20  |
| [P65882]PURA_SALTY Adenylosuccinate synthetase | 4  |                       | VGDLFDKETFAEK                      | 148 | 13 | 9  | 43.45  | b5°b5y2°y2y7y9y10y11°y11                 | 1498.73 | 60.075  | 13347 | 3 | 500.25  | -11.08 |
| [P65882]PURA_SALTY Adenylosuccinate synthetase | 5  | Carbamidomethyl+C(11) | AVQLNSLSGFCLTK                     | 318 | 14 | 6  | 36.07  | b3b11y6y8°y8y10                          | 1537.78 | 74.849  | 5809  | 2 | 769.40  | -13.26 |
| [P65882]PURA_SALTY Adenylosuccinate synthetase | 6  | Carbamidomethyl+C(7)  | LLLSEACPLILDYHVALDNAR              | 97  | 21 | 9  | 48.39  | b3y3y6*y6y8*y8y11y12y14                  | 2396.26 | 92.414  | 29816 | 3 | 799.42  | -2.45  |
| [P65882]PURA_SALTY Adenylosuccinate synthetase | 7  |                       | EVTTTPLAADDWK                      | 354 | 13 | 3  | 18.63  | b3b8y12                                  | 1446.70 | 81.395  | 5971  | 3 | 482.90  | -7.59  |
| [P65882]PURA_SALTY Adenylosuccinate synthetase | 8  |                       | ETFAEK                             | 155 | 6  | 2  | 12.8   | y3°y3                                    | 724.35  | 37.312  | 4921  | 1 | 724.35  | -8.43  |
| [P65882]PURA_SALTY Adenylosuccinate synthetase | 9  |                       | MPDGR                              | 349 | 5  | 3  | 24.61  | b3y4°y4                                  | 575.27  | 63.640  | 3276  | 1 | 575.27  | 12.10  |
| [P65882]PURA_SALTY Adenylosuccinate synthetase | 10 |                       | MGNNVVVLGTQWGDEGK                  | 0   | 17 | 6  | 23.59  | b11°b11y4°y4y8y11                        | 1803.89 | 63.616  | 3041  | 2 | 902.45  | 13.67  |
| [P65882]PURA_SALTY Adenylosuccinate synthetase | 11 |                       | ENVTSIIGNGVLSALMK                  | 62  | 20 | 4  | 22.97  | b4b5b11y6                                | 2029.06 | 117.213 | 2267  | 3 | 677.03  | -18.83 |
| [P65882]PURA_SALTY Adenylosuccinate synthetase | 12 | Carbamidomethyl+C(2)  | LCVAYR                             | 343 | 6  | 1  | 12.8   | b5                                       | 781.41  | 35.905  | 1907  | 2 | 391.21  | 4.06   |
| [P65882]PURA_SALTY Adenylosuccinate synthetase | 13 |                       | MPDGREVTTTPLAADDWK                 | 349 | 18 | 4  | 14.03  | b5°b5b15y14                              | 2002.97 | 103.676 | 25952 | 2 | 1001.99 | 10.48  |
| [P65882]PURA_SALTY Adenylosuccinate synthetase | 14 | Carbamidomethyl+C(12) | RAVQLNSLSGFCLTK                    | 317 | 15 | 3  | 16.31  | b11y5y8                                  | 1693.90 | 79.493  | 24641 | 2 | 847.46  | -0.65  |
| [P65882]PURA_SALTY Adenylosuccinate synthetase | 15 |                       | EVMMEYHNFLVNYKAEAVDYQK             | 163 | 23 | 4  | 18.12  | b3y4y7y10                                | 2881.34 | 114.188 | 8921  | 3 | 961.12  | -5.00  |
| [P65882]PURA_SALTY Adenylosuccinate synthetase | 16 |                       | VGDLFDKETFAEK                      | 148 | 13 | 4  | 31.15  | b9y6y9y11                                | 1498.74 | 57.893  | 6033  | 3 | 500.25  | 1.14   |
| [P65882]PURA_SALTY Adenylosuccinate synthetase | 17 |                       | EVTTTPLAADDWKVGVEPIYETMPGWSESTFGVK | 354 | 33 | 9  | 24.86  | b3b6°b6b10b14y8y10y13°y13                | 3641.76 | 122.899 | 5169  | 3 | 1214.59 | 6.23   |
| [P65882]PURA_SALTY Adenylosuccinate synthetase | 18 | Carbamidomethyl+C(2)  | LCVAYRMPDGR                        | 343 | 11 | 10 | 102.92 | b5b7b8b9y5y6y7y8y9°y9                    | 1337.64 | 63.692  | 3499  | 2 | 669.32  | -3.74  |
| [P65882]PURA_SALTY Adenylosuccinate synthetase | 19 |                       | VLDDTMAVADILTSMVVDVSDLLDQARQR      | 186 | 29 | 7  | 22.76  | b5b14y6y7y12°y12*y12                     | 3189.62 | 136.498 | 2385  | 4 | 798.16  | 1.91   |
| [P65882]PURA_SALTY Adenylosuccinate synthetase | 20 |                       | GNNVVVLGTQWGDEGKGK                 | 1   | 18 | 6  | 22.95  | b12b13°b13°b13b15°b15                    | 1857.93 | 79.395  | 2172  | 2 | 929.47  | -10.51 |
| [P65882]PURA_SALTY Adenylosuccinate synthetase | 21 |                       | EMKELEDR                           | 82  | 8  | 3  | 30.62  | b5b6y5                                   | 1049.49 | 71.052  | 1920  | 2 | 525.25  | -4.30  |
| [P65882]PURA_SALTY Adenylosuccinate synthetase | 22 | Oxidation+M()         | ENVTSIIGNGVLSALMKEMKELEDR          | 62  | 28 | 7  | 36.99  | b16y3y4y8y10y11°y11                      | 3075.56 | 115.019 | 4269  | 3 | 1025.86 | -4.29  |
| [P65882]PURA_SALTY Adenylosuccinate synthetase | 23 | Oxidation+M(9)        | GVEPIYETMPGWSESTFGVKDR             | 367 | 22 | 3  | 12.26  | b4b15y11                                 | 2501.17 | 88.959  | 3655  | 2 | 1251.09 | 2.05   |
| [P65882]PURA_SALTY Adenylosuccinate synthetase | 24 | Oxidation+M(9)        | GVEPIYETMPGWSESTFGVK               | 367 | 20 | 3  | 13.01  | b3y9y12                                  | 2230.06 | 106.167 | 3436  | 3 | 744.03  | 10.29  |
| [P00924]ENO1_YEAST Enolase 1                   | 1  |                       | NVNDVIAPAFVK                       | 67  | 12 | 8  | 45.75  | b2b5y2y5y7y8y10*y10                      | 1286.71 | 67.011  | 86652 | 2 | 643.86  | -3.13  |
| [P00924]ENO1_YEAST Enolase 1                   | 2  |                       | VNQIGTLSSEIK                       | 346 | 12 | 17 | 101.2  | b2b3b6b8y1y2y3y4°y4y6°y6y7y8°y8y9°y9y12  | 1288.71 | 55.238  | 72373 | 2 | 644.86  | 1.14   |
| [P00924]ENO1_YEAST Enolase 1                   | 3  |                       | SIVPSGASTGVHEALEMR                 | 32  | 18 | 6  | 22.36  | b2°b2b5y3y6y15                           | 1840.91 | 62.640  | 53827 | 3 | 614.31  | -9.22  |
| [P00924]ENO1_YEAST Enolase 1                   | 4  |                       | TFAEALR                            | 178 | 7  | 7  | 50.21  | b1y1y3y4y5y6y7                           | 807.42  | 46.585  | 48117 | 2 | 404.22  | -14.66 |
| [P00924]ENO1_YEAST Enolase 1                   | 5  |                       | IATAIEK                            | 330 | 7  | 5  | 19.58  | b2b4y5°y5y7                              | 745.45  | 48.377  | 20095 | 1 | 745.45  | 7.70   |

|                                                              |    |                       |                                   |     |    |    |       |                                                   |         |         |        |   |         |        |
|--------------------------------------------------------------|----|-----------------------|-----------------------------------|-----|----|----|-------|---------------------------------------------------|---------|---------|--------|---|---------|--------|
| [P00924]ENO1_YEAST Enolase 1                                 | 6  |                       | AVDDFLISLDGTANK                   | 88  | 15 | 6  | 33.44 | b7b13y6y7y13y15                                   | 1578.81 | 83.101  | 16296  | 2 | 789.91  | 7.04   |
| [P00924]ENO1_YEAST Enolase 1                                 | 7  |                       | AADALLLK                          | 338 | 8  | 6  | 70.54 | b3y3y4y5y6y7                                      | 814.49  | 54.691  | 105398 | 2 | 407.75  | -16.56 |
| [P00924]ENO1_YEAST Enolase 1                                 | 8  |                       | IGSEVYHNLK                        | 185 | 10 | 4  | 37.9  | b4b9y4y5                                          | 1159.59 | 39.417  | 56421  | 3 | 387.20  | -17.90 |
| [P00924]ENO1_YEAST Enolase 1                                 | 9  |                       | GNPTVEVELTTEK                     | 15  | 13 | 10 | 50.01 | b4b5°b5°b5b8y4°y4y6y12°<br>y12                    | 1416.71 | 63.741  | 55586  | 2 | 708.86  | -6.89  |
| [P00924]ENO1_YEAST Enolase 1                                 | 10 |                       | LNQLLR                            | 409 | 6  | 3  | 37.41 | y3y4y5                                            | 756.46  | 43.694  | 35288  | 2 | 378.73  | -13.55 |
| [P00924]ENO1_YEAST Enolase 1                                 | 11 |                       | NVPLYK                            | 126 | 6  | 2  | 25.1  | b3y4                                              | 733.42  | 37.987  | 13348  | 1 | 733.42  | -5.33  |
| [P00924]ENO1_YEAST Enolase 1                                 | 12 |                       | AAQDSFAAGWGVMSHR                  | 358 | 17 | 4  | 23.33 | y3y4y7°y7                                         | 1789.87 | 51.763  | 12686  | 3 | 597.29  | 11.87  |
| [P00924]ENO1_YEAST Enolase 1                                 | 13 |                       | TFAEALRGSEVYHNLK                  | 178 | 17 | 3  | 14.67 | b10b16y9                                          | 1948.03 | 89.336  | 3077   | 3 | 650.02  | 2.44   |
| [P00924]ENO1_YEAST Enolase 1                                 | 14 |                       | SVYDSRGNPTVEVELTTEK               | 9   | 19 | 3  | 20.44 | y3y6y10                                           | 2124.05 | 69.638  | 3032   | 2 | 1062.53 | 1.03   |
| [P00924]ENO1_YEAST Enolase 1                                 | 15 |                       | AVDDFLISLDGTANKSK                 | 88  | 17 | 3  | 22.08 | b11b13b16                                         | 1793.91 | 74.626  | 1839   | 3 | 598.64  | -7.69  |
| [P65215]KDSA_SALTY 2-dehydro-3-deoxyphosphoactonate aldolase | 1  |                       | VITDVHEASQAQPVADVVDVIQL<br>PAFLAR | 91  | 29 | 10 | 29.06 | b7b8b10°b10°b10b12°b12°<br>b18y2y6                | 3101.66 | 105.227 | 23902  | 3 | 1034.56 | -0.16  |
| [P65215]KDSA_SALTY 2-dehydro-3-deoxyphosphoactonate aldolase | 2  |                       | AGMAVGLAGLFLESHDPANAK             | 226 | 22 | 9  | 57.28 | b3b4b8b9y2y5y7y12y18                              | 2166.09 | 89.090  | 20491  | 3 | 722.70  | -6.65  |
| [P65215]KDSA_SALTY 2-dehydro-3-deoxyphosphoactonate aldolase | 3  | Carbamidomethyl+C(17) | VSGNVIFDVTHALQCR                  | 189 | 18 | 8  | 37.69 | b1b7b9b13y6°y6y7y11                               | 2000.00 | 80.395  | 8674   | 3 | 667.34  | -3.17  |
| [P65215]KDSA_SALTY 2-dehydro-3-deoxyphosphoactonate aldolase | 4  |                       | VANDLPFVFLGGMNVLERS               | 12  | 19 | 8  | 33.93 | b5b7°b7b14y9y11y13°y13                            | 2078.05 | 96.398  | 5024   | 3 | 693.35  | -12.69 |
| [P65215]KDSA_SALTY 2-dehydro-3-deoxyphosphoactonate aldolase | 5  |                       | GPGLEEGMK                         | 70  | 9  | 6  | 51.2  | y3y4°y4y5y7y9                                     | 917.44  | 48.329  | 2304   | 1 | 917.44  | 4.59   |
| [P65215]KDSA_SALTY 2-dehydro-3-deoxyphosphoactonate aldolase | 6  | Carbamidomethyl+C(2)  | ICEHYVTVTQK                       | 36  | 11 | 5  | 22.11 | b3°b3b9°b9y9                                      | 1377.67 | 37.459  | 10920  | 3 | 459.89  | -11.78 |
| [P65215]KDSA_SALTY 2-dehydro-3-deoxyphosphoactonate aldolase | 7  |                       | QTDLVEAMAK                        | 120 | 10 | 6  | 36.93 | b4°b4b6°b6b7y3                                    | 1105.55 | 103.674 | 7653   | 1 | 1105.55 | -2.65  |
| [P65215]KDSA_SALTY 2-dehydro-3-deoxyphosphoactonate aldolase | 8  |                       | SSIHSYR                           | 63  | 7  | 5  | 34.89 | b4°b4b5y3°y3                                      | 849.44  | 33.401  | 1623   | 2 | 425.22  | 21.13  |
| [P65215]KDSA_SALTY 2-dehydro-3-deoxyphosphoactonate aldolase | 9  |                       | GANFGYDNLVVDMLGFSVMKK             | 168 | 21 | 3  | 21.05 | b10b11y10                                         | 2305.16 | 79.452  | 28456  | 3 | 769.06  | 12.71  |
| [P65215]KDSA_SALTY 2-dehydro-3-deoxyphosphoactonate aldolase | 10 |                       | VVNIGDIKVANDLPFVFLGGMNVLERS       | 4   | 27 | 5  | 17.27 | y7y9°y9°y9y20                                     | 2916.58 | 92.557  | 11734  | 3 | 972.86  | 3.60   |
| [P65215]KDSA_SALTY 2-dehydro-3-deoxyphosphoactonate aldolase | 11 | Carbamidomethyl+C(4)  | VILCDRGANFGYDNLVVDMLGFS<br>VMK    | 162 | 26 | 3  | 21.11 | b4y4y5                                            | 2933.42 | 56.737  | 4004   | 5 | 587.49  | -5.08  |
| [P65215]KDSA_SALTY 2-dehydro-3-deoxyphosphoactonate aldolase | 12 |                       | SSIHSYRGPGLLEEGMK                 | 63  | 16 | 6  | 37.74 | b7b9b12y6°y6y7                                    | 1747.83 | 69.550  | 2159   | 3 | 583.28  | -9.99  |
| [P65215]KDSA_SALTY 2-dehydro-3-deoxyphosphoactonate aldolase | 13 | Oxidation+M(3)        | AGMAVGLAGLFLESHDPANAK             | 226 | 22 | 8  | 22.13 | b11y8°y8°y8y9°y9y11°y11                           | 2182.10 | 116.960 | 2512   | 2 | 1091.56 | 3.80   |
| [P0A2F6]SSB_SALTY Single-stranded DNA-binding protein        | 1  |                       | LAEVAGEYLR                        | 63  | 10 | 7  | 54    | b2b3y5y6y7y8y10                                   | 1120.59 | 55.331  | 40665  | 2 | 560.80  | -6.43  |
| [P0A2F6]SSB_SALTY Single-stranded DNA-binding protein        | 2  |                       | VILVGNLGQDPEVR                    | 8   | 14 | 9  | 51.48 | b3b4y1y2y4y8y11y12y14                             | 1508.84 | 66.710  | 31316  | 2 | 754.93  | 1.05   |
| [P0A2F6]SSB_SALTY Single-stranded DNA-binding protein        | 3  |                       | YTTEINVPQIGGVMQMLGGR              | 97  | 20 | 8  | 25.61 | b9°b9°b9b12°b12y7y8°y8                            | 2164.07 | 115.948 | 10464  | 2 | 1082.54 | -9.70  |
| [P0A2F6]SSB_SALTY Single-stranded DNA-binding protein        | 4  |                       | QTGEMK                            | 44  | 6  | 1  | 12.8  | y5                                                | 693.33  | 50.387  | 15987  | 1 | 693.33  | 9.24   |
| [P0A2F6]SSB_SALTY Single-stranded DNA-binding protein        | 5  |                       | VVMFGK                            | 57  | 6  | 1  | 12.8  | b5                                                | 680.37  | 46.470  | 8339   | 2 | 340.69  | -8.79  |
| [P0A2F6]SSB_SALTY Single-stranded DNA-binding protein        | 6  |                       | GSQVYIEGQLR                       | 74  | 11 | 3  | 33.87 | b4b6b8                                            | 1249.63 | 80.901  | 3419   | 3 | 417.22  | -15.92 |
| [P0A2F6]SSB_SALTY Single-stranded DNA-binding protein        | 7  |                       | VVMFGKLAEVAGEYLR                  | 57  | 16 | 3  | 21.96 | b13y4y5                                           | 1781.94 | 76.287  | 12909  | 3 | 594.65  | -13.56 |
| [P0A2F6]SSB_SALTY Single-stranded DNA-binding protein        | 8  |                       | QTGEMKEQTEWHR                     | 44  | 13 | 3  | 18.63 | b6b12y9                                           | 1659.75 | 80.259  | 4834   | 3 | 553.92  | -0.59  |
| [P0A2F6]SSB_SALTY Single-stranded DNA-binding protein        | 9  |                       | YMPSSGAVANLTLATSESWRDK            | 22  | 22 | 16 | 98.41 | b9b10b11°b11b12°b12b13°<br>b13y4°y4y5y7y8°y8y9°y9 | 2354.13 | 114.081 | 3402   | 3 | 785.38  | -4.87  |
| [P0A2F6]SSB_SALTY Single-stranded DNA-binding protein        | 10 | Oxidation+M(5)        | QTGEMKEQTEWHR                     | 44  | 13 | 3  | 18.63 | b3b9y8                                            | 1675.75 | 47.809  | 2679   | 2 | 838.38  | 3.28   |

|                                                              |    |                      |                             |     |    |    |       |                                          |         |         |       |   |         |        |
|--------------------------------------------------------------|----|----------------------|-----------------------------|-----|----|----|-------|------------------------------------------|---------|---------|-------|---|---------|--------|
| P0A1V4 KAD_SALTY Adenylate kinase                            | 1  |                      | LVEYHQMTAPLIGYYQK           | 167 | 17 | 6  | 38.11 | b11y3y4y5y8y17                           | 2054.03 | 70.247  | 55142 | 3 | 685.35  | -5.82  |
| P0A1V4 KAD_SALTY Adenylate kinase                            | 2  |                      | VDGTQAVADV R                | 195 | 11 | 5  | 25.12 | b3y2y9y10y11                             | 1130.57 | 37.614  | 43898 | 2 | 565.79  | -4.97  |
| P0A1V4 KAD_SALTY Adenylate kinase                            | 3  |                      | YGIPQISTGDMLR               | 23  | 13 | 6  | 38.42 | b2y3y7y8y10y13                           | 1450.74 | 73.651  | 41992 | 2 | 725.87  | 1.51   |
| P0A1V4 KAD_SALTY Adenylate kinase                            | 4  |                      | NGFLLDGFPR                  | 78  | 10 | 6  | 54    | b3y1y4y5y6y7                             | 1135.59 | 81.717  | 37381 | 2 | 568.30  | -3.98  |
| P0A1V4 KAD_SALTY Adenylate kinase                            | 5  |                      | GTQAQFIMEK                  | 13  | 10 | 4  | 31.61 | y2y3y4y7                                 | 1152.58 | 49.536  | 27307 | 2 | 576.79  | 7.73   |
| P0A1V4 KAD_SALTY Adenylate kinase                            | 6  |                      | IILLGAPGAGK                 | 2   | 11 | 8  | 62.74 | b2b3y2y3y5y7y9y11                        | 1009.63 | 61.978  | 25991 | 2 | 505.32  | -5.80  |
| P0A1V4 KAD_SALTY Adenylate kinase                            | 7  |                      | VEGKDDVTGEDLTTR             | 141 | 15 | 4  | 16.31 | b9y10y12y15                              | 1634.81 | 72.434  | 19741 | 2 | 817.91  | 12.92  |
| P0A1V4 KAD_SALTY Adenylate kinase                            | 8  |                      | FNPPK                       | 136 | 5  | 1  | 12.3  | b3                                       | 602.32  | 56.749  | 15087 | 1 | 602.32  | -9.02  |
| P0A1V4 KAD_SALTY Adenylate kinase                            | 9  | Carbamidomethyl+C(6) | IAQEDCRNGFLLDGFPR           | 71  | 17 | 3  | 23.33 | y5y9y10                                  | 2007.99 | 89.619  | 36677 | 2 | 1004.50 | 9.30   |
| P0A1V4 KAD_SALTY Adenylate kinase                            | 10 |                      | IILLGAPGAGKGTQAQFIMEK       | 2   | 21 | 4  | 25.19 | b3b4y17y19                               | 2143.18 | 73.638  | 33615 | 3 | 715.07  | -4.44  |
| P0A1V4 KAD_SALTY Adenylate kinase                            | 11 |                      | AAVKS GSELGK                | 36  | 11 | 4  | 25.12 | b8y6°y6y7                                | 1046.60 | 68.264  | 18551 | 2 | 523.80  | 11.20  |
| P0A1V4 KAD_SALTY Adenylate kinase                            | 12 |                      | EAEAGNTKYAK                 | 184 | 11 | 4  | 33.62 | b4b7b8y9                                 | 1181.59 | 47.837  | 8328  | 3 | 394.53  | 4.65   |
| P0A1V4 KAD_SALTY Adenylate kinase                            | 13 |                      | GTQAQFIMEKYGIPQISTGDMLR     | 13  | 23 | 15 | 85.31 | b5°b5b8b9b10°b10b11°b11y6y7y8°y8y9°y9*y9 | 2584.26 | 64.421  | 5050  | 4 | 646.82  | -9.83  |
| P0A1V4 KAD_SALTY Adenylate kinase                            | 14 |                      | NGFLLDGFPR TIPQADAMK        | 78  | 19 | 3  | 13.48 | b13y6y9                                  | 2091.06 | 82.217  | 1514  | 3 | 697.69  | -2.57  |
| P0A1V4 KAD_SALTY Adenylate kinase                            | 15 | Oxidation+M(11)      | YGIPQISTGDMLR               | 23  | 13 | 4  | 31.51 | b3b5y4y5                                 | 1466.75 | 103.521 | 2469  | 3 | 489.59  | 11.40  |
| P0A1V4 KAD_SALTY Adenylate kinase                            | 16 | Oxidation+M(7)       | LVEYHQMTAPLIGYYQK           | 167 | 17 | 8  | 40.07 | b7°b7b8°b8b9y4y6*y6                      | 2070.01 | 122.879 | 2272  | 3 | 690.68  | -12.38 |
| P0AA02 NUSG_SALTY Transcription antitermination protein nusG | 1  |                      | TLFEPGEMVR                  | 125 | 10 | 9  | 24.62 | b2°b2b6°b6b9y1y2y5y10                    | 1178.59 | 66.008  | 38934 | 2 | 589.80  | -0.21  |
| P0AA02 NUSG_SALTY Transcription antitermination protein nusG | 2  |                      | VMGFIGGTS DRPAPISDKEVDAIMNR | 88  | 26 | 7  | 37.93 | b2b3b4b8b9b13y5                          | 2776.35 | 74.024  | 25263 | 4 | 694.84  | -10.02 |
| P0AA02 NUSG_SALTY Transcription antitermination protein nusG | 3  |                      | EVDAIMNR                    | 106 | 8  | 5  | 30.62 | b4b5°b5b8y3                              | 947.46  | 34.183  | 14997 | 2 | 474.23  | -0.71  |
| P0AA02 NUSG_SALTY Transcription antitermination protein nusG | 4  |                      | WYVVQAFSGFEGR               | 8   | 13 | 7  | 31.15 | b6y3y6°y6y11°y11y13                      | 1545.73 | 71.872  | 4213  | 2 | 773.37  | -11.69 |
| P0AA02 NUSG_SALTY Transcription antitermination protein nusG | 5  |                      | VMGFIGGTS DRPAPISDK         | 88  | 18 | 6  | 19.28 | b4b9°b9y3y13°y13                         | 1847.91 | 70.197  | 3590  | 3 | 616.64  | -14.53 |
| P0AA02 NUSG_SALTY Transcription antitermination protein nusG | 6  |                      | VNDGPFADFN GVVEEVDYEK       | 135 | 20 | 5  | 24.81 | b3b8b15y3y8                              | 2243.03 | 87.104  | 21153 | 2 | 1122.02 | 7.62   |
| P0AA02 NUSG_SALTY Transcription antitermination protein nusG | 7  |                      | FFPGYVLVQMVMNDASWHLVR       | 63  | 21 | 3  | 22.26 | y5y9y10                                  | 2509.25 | 130.047 | 3033  | 3 | 837.09  | -1.46  |
| P0AA02 NUSG_SALTY Transcription antitermination protein nusG | 8  |                      | ATPVELDFSQVEKA              | 167 | 14 | 8  | 53.98 | b10y3y4°y4y9*y9y10y12                    | 1533.78 | 70.650  | 23673 | 2 | 767.39  | -0.40  |



|                                                              |    |                       |                              |     |    |    |       |                                        |         |         |       |   |         |        |
|--------------------------------------------------------------|----|-----------------------|------------------------------|-----|----|----|-------|----------------------------------------|---------|---------|-------|---|---------|--------|
| P0AA02 NUSG_SALTY Transcription antitermination protein nusG | 9  |                       | VNDGPFADFNGVVEVDYEKSR        | 135 | 22 | 4  | 18.77 | y5°y5y10y13                            | 2486.18 | 95.494  | 4689  | 2 | 1243.59 | 12.96  |
| P0AA02 NUSG_SALTY Transcription antitermination protein nusG | 10 |                       | WYVVQAFSGFEGRVATSLR          | 8   | 19 | 4  | 20.44 | b7*b7b9b11                             | 2173.15 | 107.943 | 1730  | 2 | 1087.08 | 14.49  |
| P0AA02 NUSG_SALTY Transcription antitermination protein nusG | 11 |                       | TLFEPGE                      | 125 | 7  | 0  | 2.48  |                                        | 792.39  | 66.035  | 5299  | 1 | 792.39  | 14.10  |
| P0AA02 NUSG_SALTY Transcription antitermination protein nusG | 12 |                       | VMGFIGGTSDRPAPISDKE          | 88  | 19 | 1  | 9.51  | y3                                     | 1976.97 | 74.051  | 4774  | 3 | 659.66  | 0.12   |
| P0AA02 NUSG_SALTY Transcription antitermination protein nusG | 13 |                       | FEPGEMVR                     | 127 | 8  | 0  | 2.48  |                                        | 964.46  | 66.018  | 1960  | 1 | 964.46  | 4.56   |
| Q8ZRN1 METQ_SALTY D-methionine-binding lipoprotein metQ      | 1  |                       | TFVYPIAGYSK                  | 108 | 11 | 9  | 33.87 | b2b3°b3b6b10b11y2°y2y11                | 1245.64 | 65.274  | 34425 | 2 | 623.32  | -8.23  |
| Q8ZRN1 METQ_SALTY D-methionine-binding lipoprotein metQ      | 2  |                       | IVELEAPQLPR                  | 178 | 11 | 4  | 33.62 | b3y5y6y9                               | 1264.72 | 67.123  | 30576 | 2 | 632.86  | -6.47  |
| Q8ZRN1 METQ_SALTY D-methionine-binding lipoprotein metQ      | 3  |                       | SLDELKDGSQVAVPNDPTNLGR       | 122 | 22 | 7  | 31.47 | b7°b7b10b13b15y6y9                     | 2325.16 | 58.745  | 18641 | 3 | 775.73  | -2.10  |
| Q8ZRN1 METQ_SALTY D-methionine-binding lipoprotein metQ      | 4  |                       | FVQAYQSDEVYEAANK             | 245 | 16 | 3  | 15.43 | b3b10y12                               | 1861.88 | 51.887  | 7352  | 2 | 931.45  | 12.33  |
| Q8ZRN1 METQ_SALTY D-methionine-binding lipoprotein metQ      | 5  |                       | DGIFVEDKDYVNLIVTREDNKDA ENVK | 215 | 29 | 5  | 11    | b7y8y12°y12y29                         | 3322.69 | 111.521 | 7016  | 3 | 1108.24 | 14.92  |
| Q8ZRN1 METQ_SALTY D-methionine-binding lipoprotein metQ      | 6  | Carbamidomethyl+C(17) | TFAAVGALIGSLALAGCGQDEKD PNHK | 6   | 28 | 5  | 17.09 | y9*y9y13y15y28                         | 2853.44 | 94.331  | 5866  | 3 | 951.82  | -4.11  |
| Q8ZRN1 METQ_SALTY D-methionine-binding lipoprotein metQ      | 7  |                       | DGSQVAVPNDPTNLGR             | 128 | 16 | 8  | 54.84 | b5b8b9*b9b14b15y11y14                  | 1639.80 | 66.036  | 12743 | 3 | 547.27  | -2.38  |
| Q8ZRN1 METQ_SALTY D-methionine-binding lipoprotein metQ      | 8  |                       | DGVGLLPTSLDIVENPK            | 158 | 17 | 7  | 24.84 | b10y7y10°y10*y10y11°y11                | 1766.99 | 82.159  | 8528  | 3 | 589.67  | 19.90  |
| Q8ZRN1 METQ_SALTY D-methionine-binding lipoprotein metQ      | 9  | Carbamidomethyl+C(17) | TFAAVGALIGSLALAGCGQDEK       | 6   | 22 | 6  | 34.7  | b5b7b8y3y4°y4                          | 2149.06 | 102.067 | 4239  | 2 | 1075.03 | -18.63 |
| Q8ZRN1 METQ_SALTY D-methionine-binding lipoprotein metQ      | 10 |                       | FVQAYQSDEVYEAANKVFNGGA VK    | 245 | 24 | 5  | 14.96 | b7°b7b20y14y22                         | 2634.29 | 78.405  | 23548 | 3 | 878.77  | 1.30   |
| P0A2A9 RS16_SALTY 30S ribosomal protein S16                  | 1  |                       | IAHWVGQGATISDR               | 56  | 14 | 8  | 46.04 | b4b8b10°y5y7y10y11y14                  | 1510.78 | 49.007  | 65512 | 2 | 755.89  | 0.97   |
| P0A2A9 RS16_SALTY 30S ribosomal protein S16                  | 2  |                       | VGFFNPIASEKEEGTR             | 35  | 16 | 9  | 31.21 | b1b2b3b7y6y9y11°y11y16                 | 1780.87 | 59.912  | 29205 | 2 | 890.94  | -6.65  |
| P0A2A9 RS16_SALTY 30S ribosomal protein S16                  | 3  |                       | VGFFNPIASEK                  | 35  | 11 | 8  | 51.94 | b5b7*b7b9*b9b10y7*y7                   | 1208.62 | 47.716  | 23707 | 2 | 604.81  | -12.02 |
| P0A2A9 RS16_SALTY 30S ribosomal protein S16                  | 4  |                       | VGFFNPIASEKEEGTR             | 35  | 16 | 3  | 21.96 | b10y13y14                              | 1780.91 | 82.305  | 7805  | 2 | 890.96  | 13.30  |
| Q7CPZ4 GRPE_SALTY Protein grpE                               | 1  |                       | FVNELLPVIDSLDR               | 90  | 14 | 3  | 22.81 | b4b5y8                                 | 1629.89 | 97.694  | 38967 | 2 | 815.45  | 5.47   |
| Q7CPZ4 GRPE_SALTY Protein grpE                               | 2  |                       | IANLEVQLAEAQTR               | 43  | 14 | 14 | 63.11 | b2b3b10*b10y4y5*y5y6°y6y7*y7y10*y10y14 | 1555.84 | 64.390  | 21646 | 2 | 778.42  | -2.67  |

|                                                                        |    |                 |                                        |     |    |    |       |                                          |         |         |       |   |         |        |
|------------------------------------------------------------------------|----|-----------------|----------------------------------------|-----|----|----|-------|------------------------------------------|---------|---------|-------|---|---------|--------|
| Q7CPZ4 GRPE_SALTY Protein grpE                                         | 3  |                 | DEKIANLEVQLAEAQTR                      | 40  | 17 | 5  | 14.67 | b6*b6b16y5°y5                            | 1928.01 | 65.433  | 8234  | 3 | 643.34  | -1.27  |
| Q7CPZ4 GRPE_SALTY Protein grpE                                         | 4  |                 | TPEGQAPEEIMDQHEEVEAVEPN<br>DSAEQVDPREK | 7   | 36 | 5  | 22.07 | b6y4y5y7y12                              | 4060.82 | 64.334  | 6789  | 4 | 1015.96 | -0.66  |
| Q7CPZ4 GRPE_SALTY Protein grpE                                         | 5  |                 | ALEVADKANPDMAAMVEGIELTL<br>K           | 104 | 24 | 9  | 57.16 | b4b5b11b12*b12b15b16°b<br>16y16          | 2529.27 | 122.798 | 2248  | 3 | 843.76  | -8.20  |
| Q7CPZ4 GRPE_SALTY Protein grpE                                         | 6  |                 | RTEQDIEK                               | 74  | 8  | 7  | 50.7  | b4b6°b6*b6y5y7*y7                        | 1018.52 | 82.819  | 1588  | 1 | 1018.52 | 2.58   |
| P16657 FABI_SALTY Enoyl-[acyl-carrier-<br>protein] reductase [NADH]    | 1  |                 | FDGFFVHSIGFAPGDQLDGDYVNA<br>VTR        | 84  | 26 | 13 | 43.73 | b11°b11b12b18y1y2y4y5*<br>y5y8y10y14y26  | 2797.34 | 83.417  | 29451 | 3 | 933.12  | 5.50   |
| P16657 FABI_SALTY Enoyl-[acyl-carrier-<br>protein] reductase [NADH]    | 2  |                 | TMLNPGSALLTLSYLGAER                    | 132 | 19 | 15 | 64.63 | b1°b1b2b7b8b10y1y4y5y6°<br>y6y7°y7y15y19 | 2007.07 | 101.900 | 24019 | 2 | 1004.04 | 4.26   |
| P16657 FABI_SALTY Enoyl-[acyl-carrier-<br>protein] reductase [NADH]    | 3  |                 | MGFLSGKR                               | 0   | 8  | 4  | 38.4  | b3b5°b5b6                                | 895.47  | 53.450  | 3558  | 2 | 448.24  | -13.43 |
| P16657 FABI_SALTY Enoyl-[acyl-carrier-<br>protein] reductase [NADH]    | 4  |                 | VAHDISSYSFVAMAK                        | 114 | 15 | 11 | 100.8 | b3b4b6b9b12b14y3y6y8°y<br>8y9            | 1625.80 | 63.668  | 28958 | 3 | 542.60  | -2.25  |
| P16657 FABI_SALTY Enoyl-[acyl-carrier-<br>protein] reductase [NADH]    | 5  |                 | MGFLSGK                                | 0   | 7  | 3  | 34.89 | b3b4y3                                   | 739.40  | 35.706  | 28515 | 1 | 739.40  | 19.81  |
| P16657 FABI_SALTY Enoyl-[acyl-carrier-<br>protein] reductase [NADH]    | 6  |                 | AIPNYNVMLAK                            | 151 | 12 | 3  | 30.39 | y6y8y10                                  | 1290.69 | 67.304  | 24195 | 2 | 645.85  | -1.61  |
| P16657 FABI_SALTY Enoyl-[acyl-carrier-<br>protein] reductase [NADH]    | 7  |                 | VNAISAGPIR                             | 183 | 10 | 4  | 36.93 | b3y5y6y8                                 | 997.57  | 45.218  | 16446 | 2 | 499.29  | -10.52 |
| P16657 FABI_SALTY Enoyl-[acyl-carrier-<br>protein] reductase [NADH]    | 8  |                 | EGAELAFYQNDK                           | 30  | 13 | 5  | 44.03 | b6b7y5y8y11                              | 1485.71 | 66.009  | 14069 | 3 | 495.91  | 18.16  |
| P16657 FABI_SALTY Enoyl-[acyl-carrier-<br>protein] reductase [NADH]    | 9  |                 | ASLEANVRYMANAMGPEGVR                   | 163 | 20 | 9  | 32.14 | b4°b4b6°b6b9*b9y5y9y11                   | 2136.05 | 71.143  | 3412  | 4 | 534.77  | 8.12   |
| P16657 FABI_SALTY Enoyl-[acyl-carrier-<br>protein] reductase [NADH]    | 10 | Oxidation+M(8)  | AIPNYNVMLAK                            | 151 | 12 | 6  | 56.54 | b3b6b9b11y10*y10                         | 1306.69 | 48.952  | 14386 | 2 | 653.85  | 7.10   |
| P16657 FABI_SALTY Enoyl-[acyl-carrier-<br>protein] reductase [NADH]    | 11 | Oxidation+M(13) | VAHDISSYSFVAMAK                        | 114 | 15 | 5  | 39.46 | b8b9y7y8y12                              | 1641.78 | 47.795  | 3555  | 2 | 821.39  | -7.51  |
| P14146 PHOP_SALTY Virulence<br>transcriptional regulatory protein phoP | 1  |                 | SSDVSLPVLVLTAR                         | 68  | 14 | 7  | 41.67 | b3°b3y4y8y9y10y14                        | 1456.84 | 87.502  | 62618 | 2 | 728.92  | 0.67   |
| P14146 PHOP_SALTY Virulence<br>transcriptional regulatory protein phoP | 2  |                 | VLVVEDNALLR                            | 3   | 11 | 6  | 44.41 | b2y5y7y8*y8y9                            | 1240.72 | 68.501  | 44360 | 2 | 620.86  | -5.90  |
| P14146 PHOP_SALTY Virulence<br>transcriptional regulatory protein phoP | 3  |                 | VQLQDSGHQVDAEDAR                       | 18  | 17 | 11 | 45.22 | b2*b2y2y3y9*y9y10y11°y1<br>1y15y17       | 1838.84 | 37.246  | 16512 | 3 | 613.62  | -10.75 |
| P14146 PHOP_SALTY Virulence<br>transcriptional regulatory protein phoP | 4  |                 | DSLMLQLYPDAELR                         | 172 | 14 | 7  | 36.07 | b6°b6b13*b13y7y9y11                      | 1663.81 | 94.483  | 14136 | 2 | 832.41  | -14.16 |
| P14146 PHOP_SALTY Virulence<br>transcriptional regulatory protein phoP | 5  |                 | VEVLSSGADDYVTKPFHIEVMA<br>R            | 88  | 24 | 4  | 11.71 | b8°b8y3y11                               | 2692.30 | 125.351 | 88694 | 3 | 898.11  | -9.16  |
| P14146 PHOP_SALTY Virulence<br>transcriptional regulatory protein phoP | 6  |                 | IQAQYPHDVITTVR                         | 201 | 14 | 7  | 70.51 | y4y6y7y9°y9y10y12                        | 1640.85 | 52.454  | 61962 | 3 | 547.62  | -15.77 |
| P14146 PHOP_SALTY Virulence<br>transcriptional regulatory protein phoP | 7  |                 | GQGYLFELR                              | 215 | 9  | 4  | 42.17 | b7y4y6y7                                 | 1082.55 | 72.683  | 3184  | 1 | 1082.55 | -9.81  |
| P14146 PHOP_SALTY Virulence<br>transcriptional regulatory protein phoP | 8  | Oxidation+M(8)  | VVSKDSLMLQLYPDAELR                     | 168 | 18 | 3  | 14.03 | b6y12y14                                 | 2093.07 | 92.527  | 21304 | 3 | 698.36  | -10.15 |
| P14146 PHOP_SALTY Virulence<br>transcriptional regulatory protein phoP | 9  | Oxidation+M(4)  | DSLMLQLYPDAELR                         | 172 | 14 | 4  | 27.91 | b5b12b13y6                               | 1679.84 | 98.096  | 3541  | 2 | 840.42  | 4.51   |

|                                                                              |    |                       |                                   |     |    |    |       |                                       |         |         |       |   |         |        |
|------------------------------------------------------------------------------|----|-----------------------|-----------------------------------|-----|----|----|-------|---------------------------------------|---------|---------|-------|---|---------|--------|
| [P14146 PHOP_SALTY Virulence transcriptional regulatory protein phoP         | 10 | Oxidation+M(22)       | VEVLSSGADDYVTKPFHIEEVMA<br>R      | 88  | 24 | 11 | 60.3  | b3b4b7°b7b8°b8b9y4y5°y5y11            | 2708.29 | 136.445 | 2543  | 2 | 1354.65 | -13.34 |
| [P58661 AAT_SALTY Aartate aminotransferase                                   | 1  |                       | QLFVNTLQEK                        | 322 | 10 | 7  | 36.93 | b7y3*y3y4*y4y6*y6                     | 1219.65 | 64.410  | 32223 | 2 | 610.33  | -12.91 |
| [P58661 AAT_SALTY Aartate aminotransferase                                   | 2  |                       | GSALINDK                          | 85  | 8  | 7  | 45.93 | b2°b2b5b6b7y7y8                       | 817.44  | 39.444  | 31693 | 2 | 409.22  | -2.24  |
| [P58661 AAT_SALTY Aartate aminotransferase                                   | 3  |                       | TAQTPGGTGALR                      | 96  | 12 | 4  | 24.15 | b4y8y9y12                             | 1129.59 | 30.629  | 14541 | 2 | 565.30  | -9.62  |
| [P58661 AAT_SALTY Aartate aminotransferase                                   | 4  |                       | MFENITAAPADPILGLADLFR             | 0   | 21 | 12 | 55.11 | b2b3b4b6b14y1y2y3y4y5y13y21           | 2275.19 | 121.093 | 13248 | 2 | 1138.10 | 5.26   |
| [P58661 AAT_SALTY Aartate aminotransferase                                   | 5  |                       | VWVSNPSWPNHK                      | 122 | 12 | 5  | 33.15 | b5°b5b9y7y8                           | 1450.71 | 60.810  | 9664  | 2 | 725.86  | -10.27 |
| [P58661 AAT_SALTY Aartate aminotransferase                                   | 6  |                       | FENITAAPADPILGLADLFR              | 1   | 20 | 4  | 19.8  | b7b11°b11b13                          | 2144.16 | 100.860 | 8764  | 3 | 715.39  | 8.77   |
| [P58661 AAT_SALTY Aartate aminotransferase                                   | 7  |                       | DQVLR                             | 355 | 5  | 1  | 12.3  | b4                                    | 630.35  | 42.284  | 8319  | 1 | 630.35  | -14.81 |
| [P58661 AAT_SALTY Aartate aminotransferase                                   | 8  |                       | AIWEQELTDMR                       | 304 | 11 | 6  | 35.2  | b6b7°b7y5°y5y9                        | 1391.67 | 73.991  | 4874  | 2 | 696.34  | 5.35   |
| [P58661 AAT_SALTY Aartate aminotransferase                                   | 9  |                       | GWLPLFD FayQGfAR                  | 204 | 15 | 3  | 16.31 | b3b7y4                                | 1787.89 | 116.850 | 3339  | 2 | 894.45  | -2.59  |
| [P58661 AAT_SALTY Aartate aminotransferase                                   | 10 | Carbamidomethyl+C(4)  | VGACTLVAADAETVDR                  | 254 | 16 | 4  | 21.96 | b6y11°y11y12                          | 1647.80 | 65.297  | 3191  | 2 | 824.41  | 1.41   |
| [P58661 AAT_SALTY Aartate aminotransferase                                   | 11 |                       | GLEEDAEGLR                        | 219 | 10 | 3  | 24.62 | b4y7y9                                | 1088.53 | 90.865  | 1678  | 2 | 544.77  | 7.85   |
| [P58661 AAT_SALTY Aartate aminotransferase                                   | 12 |                       | DETGK                             | 37  | 5  | 1  | 12.3  | b3                                    | 549.25  | 105.346 | 1588  | 1 | 549.25  | 0.11   |
| [P58661 AAT_SALTY Aartate aminotransferase                                   | 13 |                       | NFGLYNER                          | 246 | 8  | 5  | 45.93 | b3b4b5y7*y7                           | 1012.50 | 114.155 | 1519  | 1 | 1012.50 | 19.35  |
| [P58661 AAT_SALTY Aartate aminotransferase                                   | 14 |                       | NYLGIDGIPEFAR                     | 63  | 13 | 4  | 31.15 | b4y5y8y10                             | 1464.76 | 81.670  | 1510  | 3 | 488.92  | 4.75   |
| [P58661 AAT_SALTY Aartate aminotransferase                                   | 15 | Carbamidomethyl+C(4)  | VGACTLVAADAETVDRAFSQMK            | 254 | 22 | 3  | 12.26 | b14y5y7                               | 2340.13 | 86.635  | 8069  | 3 | 780.71  | -2.92  |
| [P58661 AAT_SALTY Aartate aminotransferase                                   | 16 | Carbamidomethyl+C(14) | NYLGIDGIPEFARCTQELLFGK            | 63  | 22 | 5  | 33.59 | b7b8°b8b9y3                           | 2541.29 | 108.075 | 5984  | 3 | 847.77  | 2.69   |
| [P58661 AAT_SALTY Aartate aminotransferase                                   | 17 |                       | RVWVSNPSWPNHK                     | 121 | 13 | 4  | 18.63 | b3y5y8*y8                             | 1606.82 | 63.746  | 4487  | 3 | 536.28  | -3.27  |
| [P58661 AAT_SALTY Aartate aminotransferase                                   | 18 |                       | DFSFIKQNGMFsfSGLTK                | 336 | 19 | 6  | 39.61 | b10y9y10y13°y13y14                    | 2167.12 | 105.379 | 3896  | 3 | 723.04  | 11.83  |
| [P58661 AAT_SALTY Aartate aminotransferase                                   | 19 |                       | SALINDK                           | 86  | 7  | 1  | 9.02  | b3                                    | 760.42  | 39.420  | 37234 | 1 | 760.42  | -4.74  |
| [P40732 ARGD_SALTY Acetylornithine/succinyl diaminopimelate aminotransferase | 1  |                       | TGDLFAymHYGVTPDILTSak             | 234 | 21 | 5  | 12.6  | b1b3b6y8y21                           | 2300.13 | 88.959  | 49895 | 3 | 767.38  | 1.06   |
| [P40732 ARGD_SALTY Acetylornithine/succinyl diaminopimelate aminotransferase | 2  |                       | FAPSLVVEEADIHEGMQR                | 377 | 18 | 3  | 22.95 | y5y6y9                                | 2027.97 | 69.302  | 47105 | 3 | 676.66  | -6.50  |
| [P40732 ARGD_SALTY Acetylornithine/succinyl diaminopimelate aminotransferase | 3  |                       | SQGETLWHTSNVFTNEPALR              | 68  | 20 | 14 | 42.78 | b1b2°b2b3°b3b11°b11y4y6y8°y8y12y13y20 | 2287.12 | 72.521  | 37822 | 3 | 763.05  | 6.08   |
| [P40732 ARGD_SALTY Acetylornithine/succinyl diaminopimelate aminotransferase | 4  |                       | VLFMNSGTEANETAFK                  | 101 | 16 | 9  | 78.58 | y6y9y10y11y12*y12y13y14y16            | 1758.85 | 68.788  | 37797 | 2 | 879.93  | 6.94   |
| [P40732 ARGD_SALTY Acetylornithine/succinyl diaminopimelate aminotransferase | 5  |                       | ATFDEVILPVYAPADFIpVK              | 10  | 20 | 9  | 33.48 | b3°b3b5b7°b7b8y1y3y12                 | 2205.19 | 103.804 | 23523 | 2 | 1103.10 | 4.32   |
| [P40732 ARGD_SALTY Acetylornithine/succinyl diaminopimelate aminotransferase | 6  | Carbamidomethyl+C(8)  | AVMDDHTCAVVVEIQGEGGVQ<br>AATPEFLK | 180 | 30 | 11 | 47.79 | b10b11b13y1y2y5y9y13y14y15y30         | 3168.55 | 76.161  | 21844 | 3 | 1056.85 | 4.55   |

|                                                                                   |    |                                                |                                                    |     |    |    |        |                                             |         |         |        |   |         |        |
|-----------------------------------------------------------------------------------|----|------------------------------------------------|----------------------------------------------------|-----|----|----|--------|---------------------------------------------|---------|---------|--------|---|---------|--------|
| [P40732]ARGD_SALTY<br>Acetylornithine/succinyldiaminopimelate<br>aminotransferase | 7  |                                                | YSDGFGPKPADIIHVPFNDLHAVK                           | 156 | 24 | 6  | 21.52  | b1b8b9b12°b12y3                             | 2637.33 | 85.803  | 3761   | 3 | 879.78  | -6.02  |
| [P40732]ARGD_SALTY<br>Acetylornithine/succinyldiaminopimelate<br>aminotransferase | 8  | Carbamidomethyl+C(3);<br>Carbamidomethyl+C(17) | DLCDEHQALLVFDEVQCGMGR                              | 213 | 21 | 5  | 19.51  | b11°b11y5y8y12                              | 2492.11 | 86.048  | 16945  | 3 | 831.38  | 4.41   |
| [P40732]ARGD_SALTY<br>Acetylornithine/succinyldiaminopimelate<br>aminotransferase | 9  |                                                | DFLYAGAEAGVMVLNAGADVMR                             | 355 | 22 | 4  | 21.01  | b11y9°y9y10                                 | 2270.14 | 112.603 | 8589   | 2 | 1135.57 | 18.28  |
| [P40732]ARGD_SALTY<br>Acetylornithine/succinyldiaminopimelate<br>aminotransferase | 10 |                                                | MATEQTAITR                                         | 0   | 10 | 3  | 24.62  | b4b8y7                                      | 1121.56 | 63.583  | 4213   | 2 | 561.28  | -2.18  |
| [P40732]ARGD_SALTY<br>Acetylornithine/succinyldiaminopimelate<br>aminotransferase | 11 |                                                | QQFVQHLQAIDEQFDIFSDIR                              | 315 | 21 | 5  | 16.74  | b3b5y7y10°y10                               | 2577.25 | 80.290  | 1914   | 3 | 859.75  | -10.04 |
| [P40732]ARGD_SALTY<br>Acetylornithine/succinyldiaminopimelate<br>aminotransferase | 12 |                                                | ATEQTAITR                                          | 1   | 9  | 4  | 28.11  | b3b5y8*y8                                   | 990.51  | 57.228  | 1832   | 2 | 495.76  | -11.15 |
| [P40732]ARGD_SALTY<br>Acetylornithine/succinyldiaminopimelate<br>aminotransferase | 13 |                                                | ATEQTAITRATFDEVILPVYAPADF<br>IPVK                  | 1   | 29 | 8  | 29.06  | b3b5b10b11°b11*b11b21y<br>9                 | 3176.68 | 136.441 | 96629  | 3 | 1059.56 | -3.46  |
| [P40732]ARGD_SALTY<br>Acetylornithine/succinyldiaminopimelate<br>aminotransferase | 14 |                                                | ATFDEVILPVYAPADFIPVKGK                             | 10  | 22 | 4  | 16.07  | b4b6y5y14                                   | 2390.30 | 95.408  | 27852  | 3 | 797.44  | 0.00   |
| [P40732]ARGD_SALTY<br>Acetylornithine/succinyldiaminopimelate<br>aminotransferase | 15 | Carbamidomethyl+C(17)                          | EYIDFAGGIAVTALGHCHPALVEA<br>LKSQGETLWHTSNVFTNEPALR | 42  | 46 | 4  | 12.22  | b3°b3b9y21                                  | 5020.43 | 88.558  | 25045  | 5 | 1004.89 | -14.49 |
| [P40732]ARGD_SALTY<br>Acetylornithine/succinyldiaminopimelate<br>aminotransferase | 16 |                                                | LIDATFAERVLFMNSGTEANETAF<br>K                      | 92  | 25 | 3  | 11.5   | b3y5y11                                     | 2775.38 | 106.274 | 2049   | 3 | 925.80  | 4.75   |
| [P40732]ARGD_SALTY<br>Acetylornithine/succinyldiaminopimelate<br>aminotransferase | 17 | Oxidation+M(16)                                | FAPSLVVEEADIHEGMQR                                 | 377 | 18 | 3  | 14.03  | b11b13y12                                   | 2043.98 | 92.192  | 13546  | 3 | 682.00  | -2.57  |
| [P40732]ARGD_SALTY<br>Acetylornithine/succinyldiaminopimelate<br>aminotransferase | 18 | Oxidation+M(4)                                 | VLFMNSGTEANETAFK                                   | 101 | 16 | 4  | 21.61  | b4b11y9y11                                  | 1774.83 | 78.383  | 3718   | 3 | 592.28  | 1.58   |
| [P40732]ARGD_SALTY<br>Acetylornithine/succinyldiaminopimelate<br>aminotransferase | 19 | Oxidation+M(12)                                | DFLYAGAEAGVMVLNAGADVMR                             | 355 | 22 | 3  | 18.77  | y5y7y12                                     | 2286.11 | 77.940  | 3679   | 3 | 762.71  | 7.90   |
| [P40732]ARGD_SALTY<br>Acetylornithine/succinyldiaminopimelate<br>aminotransferase | 20 |                                                | TSNVFTNEPALR                                       | 76  | 12 | 6  | 38.47  | b5*b5b6*b6b10b11                            | 1348.69 | 72.542  | 12970  | 2 | 674.85  | 1.36   |
| [P0A7X0]RS8_SALTY 30S ribosomal<br>protein S8                                     | 1  |                                                | SMQDPIADMLTR                                       | 1   | 12 | 16 | 112.71 | b2b3b4b7b10b12y2y3y5y6<br>°y6y8y9y10°y10y12 | 1377.65 | 79.108  | 259876 | 2 | 689.33  | -0.18  |
| [P0A7X0]RS8_SALTY 30S ribosomal<br>protein S8                                     | 2  |                                                | AAVTMPSSK                                          | 22  | 9  | 12 | 69.79  | b2b4°b4y2y3y4°y4y5y6y7°<br>y7y9             | 891.45  | 32.415  | 107124 | 2 | 446.23  | -11.37 |
| [P0A7X0]RS8_SALTY 30S ribosomal<br>protein S8                                     | 3  |                                                | AVVESIQR                                           | 69  | 8  | 5  | 45.93  | b3y4y5y6*y6                                 | 901.50  | 33.851  | 117248 | 2 | 451.25  | -15.77 |
| [P0A7X0]RS8_SALTY 30S ribosomal<br>protein S8                                     | 4  | Carbamidomethyl+C(10)                          | QAGLGGEIICYVA                                      | 117 | 13 | 3  | 18.63  | b7b12y5                                     | 1350.65 | 58.187  | 6084   | 2 | 675.83  | -15.18 |
| [P0A7X0]RS8_SALTY 30S ribosomal<br>protein S8                                     | 5  |                                                | VTMPSSK                                            | 24  | 7  | 0  | 1.99   |                                             | 749.38  | 32.400  | 13615  | 1 | 749.38  | -3.01  |
| [P0A7X0]RS8_SALTY 30S ribosomal<br>protein S8                                     | 6  |                                                | AVTMPSSK                                           | 23  | 8  | 0  | 1.99   |                                             | 820.42  | 32.381  | 3275   | 2 | 410.71  | -3.94  |
| [P60626]RL24_SALTY 50S ribosomal<br>protein L24                                   | 1  |                                                | VIVEGINLVK                                         | 33  | 10 | 8  | 54     | b2b3y4y6y7°y7y8y10                          | 1083.67 | 66.414  | 123272 | 2 | 542.34  | -6.65  |
| [P60626]RL24_SALTY 50S ribosomal<br>protein L24                                   | 2  |                                                | RDDEVIVLTGKDK                                      | 6   | 13 | 4  | 29.38  | b3b4b9y8                                    | 1487.79 | 43.883  | 4161   | 3 | 496.60  | -13.21 |

|                                              |    |                      |                                          |     |    |    |       |                                         |         |         |        |   |         |        |
|----------------------------------------------|----|----------------------|------------------------------------------|-----|----|----|-------|-----------------------------------------|---------|---------|--------|---|---------|--------|
| P60626 RL24_SALTY 50S ribosomal protein L24  | 3  |                      | SNSETIK                                  | 97  | 7  | 3  | 37.9  | b3b5y3                                  | 778.40  | 104.540 | 5457   | 1 | 778.40  | 10.27  |
| Q7CPE1 ATPA_SALTY ATP synthase subunit alpha | 1  |                      | MQLNSTEISELIK                            | 0   | 13 | 8  | 49.8  | b2b3b8y3y5y10y11y13                     | 1505.80 | 77.674  | 56845  | 2 | 753.40  | 5.03   |
| Q7CPE1 ATPA_SALTY ATP synthase subunit alpha | 2  | Carbamidomethyl+C(7) | IHGLADCMQGEMISLPGNR                      | 40  | 19 | 7  | 26.12 | b2b3b6b9y3y10y19                        | 2098.98 | 70.277  | 45006  | 3 | 700.33  | -2.56  |
| Q7CPE1 ATPA_SALTY ATP synthase subunit alpha | 3  |                      | ILEVPVGR                                 | 93  | 8  | 6  | 58.24 | b3y3y4y5y6y8                            | 882.53  | 53.396  | 40765  | 2 | 441.77  | -14.32 |
| Q7CPE1 ATPA_SALTY ATP synthase subunit alpha | 4  |                      | DSVGAVVMGPYADLAEGMK                      | 68  | 19 | 5  | 26.11 | b5°b5b13y11y12                          | 1909.93 | 84.412  | 38169  | 2 | 955.47  | 11.76  |
| Q7CPE1 ATPA_SALTY ATP synthase subunit alpha | 5  |                      | GYLADVELAK                               | 453 | 10 | 7  | 37.9  | b2b3b8y2y6y7y10                         | 1078.57 | 61.450  | 30392  | 2 | 539.79  | -4.75  |
| Q7CPE1 ATPA_SALTY ATP synthase subunit alpha | 6  |                      | TALAIDAIINQR                             | 175 | 12 | 5  | 27.38 | y4*y4y7y8y12                            | 1298.74 | 74.918  | 24731  | 2 | 649.87  | -3.67  |
| Q7CPE1 ATPA_SALTY ATP synthase subunit alpha | 7  |                      | QSVDQPQVTGYK                             | 139 | 12 | 13 | 101.9 | b12y1y2y3y4y6y7y8*y8y9y10y11y12         | 1349.66 | 35.100  | 20063  | 2 | 675.34  | -4.16  |
| Q7CPE1 ATPA_SALTY ATP synthase subunit alpha | 8  |                      | ELAAFSQFASDLDDATRK                       | 401 | 18 | 8  | 39.45 | b7b8b15y1y5y6°y6y11                     | 1984.94 | 84.298  | 16895  | 3 | 662.32  | -8.30  |
| Q7CPE1 ATPA_SALTY ATP synthase subunit alpha | 9  |                      | DHAPLMQEINQSGGYNDEIEGK                   | 477 | 22 | 5  | 18.77 | b4b9b11y2y3                             | 2445.11 | 107.243 | 2703   | 3 | 815.71  | 3.69   |
| Q7CPE1 ATPA_SALTY ATP synthase subunit alpha | 10 |                      | AVDSMIPIGR                               | 151 | 10 | 5  | 50.2  | b3b4y4y5y7                              | 1058.56 | 60.773  | 39449  | 2 | 529.79  | -2.77  |
| Q7CPE1 ATPA_SALTY ATP synthase subunit alpha | 11 |                      | QYAPMSVAQQLVLFAAER                       | 434 | 19 | 3  | 13.48 | b3y5y10                                 | 2109.10 | 93.924  | 26264  | 2 | 1055.05 | 8.80   |
| Q7CPE1 ATPA_SALTY ATP synthase subunit alpha | 12 |                      | GLLGR                                    | 101 | 5  | 3  | 36.91 | b3y3y4                                  | 515.33  | 74.673  | 12811  | 1 | 515.33  | -3.91  |
| Q7CPE1 ATPA_SALTY ATP synthase subunit alpha | 13 |                      | IAQFNVVSEAHNEGATIVSVSDGVI<br>R           | 15  | 25 | 3  | 17.73 | b4b6b12                                 | 2641.31 | 75.896  | 5914   | 3 | 881.11  | -17.56 |
| Q7CPE1 ATPA_SALTY ATP synthase subunit alpha | 14 |                      | VGGAAQTK                                 | 376 | 8  | 3  | 33.63 | b4y3y6                                  | 731.39  | 43.302  | 3498   | 1 | 731.39  | -16.69 |
| Q7CPE1 ATPA_SALTY ATP synthase subunit alpha | 15 |                      | VVNTLGAPIDGKGPVDNDGFSAV<br>EAIAPGVIDR    | 106 | 33 | 15 | 65.99 | b4°b4b5°b5°b5b27y3y5y6°y6y7y10y15y24y28 | 3263.71 | 84.960  | 47808  | 3 | 1088.57 | 5.39   |
| Q7CPE1 ATPA_SALTY ATP synthase subunit alpha | 16 |                      | VNADYVEAFTKGEVK                          | 303 | 15 | 6  | 33.44 | b4b9y8y9°y9y12                          | 1669.82 | 64.377  | 42393  | 3 | 557.28  | -11.84 |
| Q7CPE1 ATPA_SALTY ATP synthase subunit alpha | 17 |                      | GEDALIYDDLKQAVAYR                        | 252 | 19 | 4  | 13.48 | b6b11°b11y13                            | 2140.09 | 78.827  | 2351   | 2 | 1070.55 | -1.37  |
| Q7CPE1 ATPA_SALTY ATP synthase subunit alpha | 18 | Phohoryl STY(20)     | YAIALNLERDSVGAVVMGPYADL<br>AEGMK         | 59  | 28 | 5  | 22.1  | y4y7°y7y8°y8                            | 3033.44 | 95.641  | 22754  | 3 | 1011.82 | -0.40  |
| Q7CPE1 ATPA_SALTY ATP synthase subunit alpha | 19 | Phohoryl STY(29)     | IGSFEAALLAYVDRDHAPLMQEIN<br>QSGGYNDEIEGK | 463 | 36 | 3  | 22.62 | b5y6y7                                  | 4030.87 | 103.605 | 3710   | 3 | 1344.30 | 6.84   |
| Q7CPE1 ATPA_SALTY ATP synthase subunit alpha | 20 | Oxidation+M(18)      | DSVGAVVMGPYADLAEGMK                      | 68  | 19 | 5  | 26.12 | b4b8y4y6y11                             | 1925.90 | 43.261  | 1502   | 3 | 642.64  | -1.01  |
| P66932 TIG_SALTY Trigger factor              | 1  |                      | NVALEEQAVEAVLAK                          | 399 | 15 | 11 | 84.69 | b2b3b5b6b7y3y4y11y12y13y15              | 1583.87 | 81.043  | 112089 | 2 | 792.44  | 2.39   |
| P66932 TIG_SALTY Trigger factor              | 2  |                      | SQAIEGLVK                                | 287 | 9  | 4  | 28.11 | b3b5y4y9                                | 944.53  | 48.379  | 52666  | 2 | 472.77  | -10.21 |
| P66932 TIG_SALTY Trigger factor              | 3  |                      | ANDIDVPSALIDSEIDVLRR                     | 296 | 20 | 10 | 24.81 | b2°b2b3b5b13y1y2y14y16y20               | 2211.16 | 91.361  | 45168  | 3 | 737.72  | -2.32  |
| P66932 TIG_SALTY Trigger factor              | 4  |                      | ANDIDVPSALIDSEIDVLR                      | 296 | 19 | 4  | 13.48 | b4y2y3y13                               | 2055.08 | 95.429  | 18747  | 2 | 1028.04 | 8.55   |
| P66932 TIG_SALTY Trigger factor              | 5  |                      | VTIDFTGSVDGEEFEGGK                       | 163 | 18 | 8  | 27.6  | b2b4b7b10y1y2y3y5                       | 1886.88 | 121.713 | 15463  | 2 | 943.94  | 5.05   |
| P66932 TIG_SALTY Trigger factor              | 6  |                      | GLIEEMASAYEDPKEVIEFYK                    | 368 | 22 | 5  | 22.13 | b2b3y3y4y6                              | 2548.19 | 82.535  | 9765   | 3 | 850.07  | -9.29  |
| P66932 TIG_SALTY Trigger factor              | 7  |                      | INPAGAPNYVPGEYK                          | 83  | 15 | 6  | 51.01 | b13y6y8y9y11y12                         | 1589.81 | 69.637  | 2111   | 2 | 795.41  | 6.53   |
| P66932 TIG_SALTY Trigger factor              | 8  |                      | FGVEDGSVAGLR                             | 255 | 12 | 5  | 43.23 | b3b5b11y4y8                             | 1206.61 | 58.164  | 33798  | 2 | 603.81  | -2.12  |

|                                                                 |    |                       |                          |     |    |    |        |                                     |         |         |        |   |         |        |
|-----------------------------------------------------------------|----|-----------------------|--------------------------|-----|----|----|--------|-------------------------------------|---------|---------|--------|---|---------|--------|
| P66932 TIG_SALTY Trigger factor                                 | 9  |                       | QVSVETTQGLGR             | 1   | 12 | 5  | 41.9   | y5y8y9y10°y10                       | 1274.65 | 44.122  | 20970  | 3 | 425.56  | -15.04 |
| P66932 TIG_SALTY Trigger factor                                 | 10 |                       | QDVLGDLMSR               | 63  | 10 | 3  | 24.62  | b5b8y5                              | 1133.58 | 71.040  | 9572   | 2 | 567.29  | 16.37  |
| P66932 TIG_SALTY Trigger factor                                 | 11 |                       | VEER                     | 239 | 4  | 1  | 11.81  | y3                                  | 532.28  | 65.393  | 8564   | 1 | 532.28  | 7.11   |
| P66932 TIG_SALTY Trigger factor                                 | 12 |                       | VTITIAADSIETAVK          | 14  | 15 | 4  | 29.07  | b8b12y9y10                          | 1531.84 | 90.849  | 6155   | 3 | 511.28  | -11.48 |
| P66932 TIG_SALTY Trigger factor                                 | 13 |                       | MQVSVETTQGLGR            | 0   | 13 | 3  | 23.4   | b4y10y11                            | 1405.70 | 50.449  | 4636   | 2 | 703.35  | -6.69  |
| P66932 TIG_SALTY Trigger factor                                 | 14 |                       | AGEEFTIDVTFPEEYHAENLK    | 206 | 21 | 3  | 12.6   | b8y7y9                              | 2439.09 | 75.135  | 2390   | 4 | 610.53  | -20.42 |
| P66932 TIG_SALTY Trigger factor                                 | 15 |                       | ELPELTEEFIK              | 243 | 11 | 8  | 92.38  | b3b4b5b6b8y3y7y10                   | 1347.68 | 79.528  | 2119   | 2 | 674.35  | -15.49 |
| P66932 TIG_SALTY Trigger factor                                 | 16 |                       | QAAQRFGGNEK              | 316 | 11 | 3  | 25.12  | b3b4y8                              | 1205.59 | 49.343  | 177369 | 2 | 603.30  | -12.45 |
| P66932 TIG_SALTY Trigger factor                                 | 17 |                       | VSEKATSFNELMNQQA         | 416 | 16 | 6  | 38.41  | b4b8b9°b9y4y5                       | 1796.85 | 67.303  | 3037   | 3 | 599.62  | 1.09   |
| P66932 TIG_SALTY Trigger factor                                 | 18 |                       | AGEEFTIDVTFPEEYHAENLK GK | 206 | 23 | 5  | 11.96  | b11b13°b13y13°y13                   | 2624.26 | 77.079  | 2778   | 5 | 525.66  | 3.07   |
| P66932 TIG_SALTY Trigger factor                                 | 19 | Phohoryl STY(8)       | MQVSVETTQGLGRR           | 0   | 14 | 9  | 56.04  | b4b7y7°y7y8°y8*y8y9y10              | 1641.79 | 114.097 | 2287   | 2 | 821.40  | 11.90  |
| P66932 TIG_SALTY Trigger factor                                 | 20 | Oxidation+M(8)        | QDVLGDLMSR               | 63  | 10 | 3  | 31.61  | b5b6b9                              | 1149.54 | 56.332  | 2180   | 2 | 575.28  | -11.57 |
| O54296 RS11_SALTY 30S ribosomal protein S11                     | 1  |                       | ALNAAGFR                 | 98  | 8  | 8  | 75.31  | b4b7y3y4y5y6*y6y8                   | 819.44  | 42.906  | 63723  | 2 | 410.22  | -10.06 |
| O54296 RS11_SALTY 30S ribosomal protein S11                     | 2  |                       | QGNALGWATAGGSGFR         | 37  | 16 | 7  | 47.41  | b5y5y7y8y11y14y16                   | 1549.76 | 66.950  | 58939  | 2 | 775.38  | 5.12   |
| O54296 RS11_SALTY 30S ribosomal protein S11                     | 3  |                       | NLEVMVK                  | 80  | 7  | 5  | 34.89  | b5y4y5°y5y7                         | 832.45  | 49.193  | 51318  | 2 | 416.73  | -10.26 |
| O54296 RS11_SALTY 30S ribosomal protein S11                     | 4  |                       | QVSDGVAHIHASFNNITVITIDR  | 14  | 23 | 5  | 22.05  | b9b10°b10*b10b12                    | 2495.24 | 113.336 | 2802   | 3 | 832.42  | -8.90  |
| O54296 RS11_SALTY 30S ribosomal protein S11                     | 5  |                       | STPFAAQVAAER             | 57  | 12 | 15 | 143.34 | b4b5b6°b6b7b9y4y5y6y7y8*y8y9y10°y10 | 1247.66 | 50.493  | 124011 | 2 | 624.33  | 15.17  |
| O54296 RS11_SALTY 30S ribosomal protein S11                     | 6  |                       | QGNALGWATAGGSGFRGSR      | 37  | 19 | 4  | 18.32  | b10b12y12y14                        | 1849.89 | 58.741  | 20182  | 3 | 617.30  | -10.49 |
| O54296 RS11_SALTY 30S ribosomal protein S11                     | 7  | Carbamidomethyl+C(13) | STPFAAQVAAERCADAVK       | 57  | 18 | 4  | 14.03  | b7b17y17*y17                        | 1891.91 | 136.809 | 2236   | 1 | 1891.91 | -13.16 |
| Q9ZF60 GLTI_SALTY Glutamate/aartate periplasmic-binding protein | 1  |                       | VVGYSQDYSNAIVEAVKK       | 61  | 18 | 8  | 22.36  | b1b2b13°b13y3y12y16y18              | 1970.01 | 64.317  | 55899  | 3 | 657.34  | -8.12  |
| Q9ZF60 GLTI_SALTY Glutamate/aartate periplasmic-binding protein | 2  |                       | AVAFMMDDALLAGER          | 198 | 15 | 7  | 43.01  | b3b11y1y3y4y8y11                    | 1609.78 | 85.288  | 46860  | 2 | 805.39  | 6.22   |
| Q9ZF60 GLTI_SALTY Glutamate/aartate periplasmic-binding protein | 3  |                       | ESSVPFSYYDNQOK           | 47  | 14 | 10 | 35.28  | b1b2°b2b9b11y5y6y10°y10y14          | 1691.76 | 56.255  | 46817  | 2 | 846.39  | 5.20   |
| Q9ZF60 GLTI_SALTY Glutamate/aartate periplasmic-binding protein | 4  |                       | VVGYSQDYSNAIVEAVK        | 61  | 17 | 7  | 36.6   | y2y3y11y12*y12y13y17                | 1841.94 | 68.774  | 39966  | 2 | 921.47  | 5.10   |
| Q9ZF60 GLTI_SALTY Glutamate/aartate periplasmic-binding protein | 5  | Carbamidomethyl+C(13) | IPLLQNGTFDFECGSTTNLER    | 98  | 22 | 4  | 33.57  | b11b12y9y10                         | 2526.22 | 111.951 | 1763   | 3 | 842.74  | 8.79   |
| Q9ZF60 GLTI_SALTY Glutamate/aartate periplasmic-binding protein | 6  | Carbamidomethyl+C(19) | KPDNWEIVGKPKSQEAYGCMLR   | 217 | 22 | 4  | 12.26  | b3°b3y3y5                           | 2606.31 | 136.441 | 21780  | 3 | 869.44  | 22.20  |
| Q9ZF60 GLTI_SALTY Glutamate/aartate periplasmic-binding protein | 7  |                       | WFDK                     | 264 | 4  | 1  | 11.81  | b3                                  | 595.29  | 34.037  | 2157   | 1 | 595.29  | 3.59   |

|                                                                 |    |                       |                                    |     |    |    |        |                                                                                                 |         |         |        |   |         |        |
|-----------------------------------------------------------------|----|-----------------------|------------------------------------|-----|----|----|--------|-------------------------------------------------------------------------------------------------|---------|---------|--------|---|---------|--------|
| Q9ZF60 GLTI_SALTY Glutamate/aartate periplasmic-binding protein | 8  |                       | NGVIVVGHR                          | 38  | 9  | 4  | 28.11  | b3*b3y4y5                                                                                       | 950.57  | 12.444  | 1905   | 2 | 475.79  | 13.93  |
| Q9ZF60 GLTI_SALTY Glutamate/aartate periplasmic-binding protein | 9  | Carbamidomethyl+C(22) | LIPITSQNRIPLLQNGTFDFECGSTTNNLER    | 89  | 31 | 5  | 24.87  | y6°y6y7y10y14                                                                                   | 3548.80 | 87.646  | 113127 | 3 | 1183.60 | 4.88   |
| Q9ZF60 GLTI_SALTY Glutamate/aartate periplasmic-binding protein | 10 |                       | NPIPPKNLNMNFELSDEMK                | 271 | 19 | 6  | 35.75  | y6°y6y7y8°y8y17                                                                                 | 2231.07 | 97.500  | 8939   | 3 | 744.36  | -5.47  |
| Q9ZF60 GLTI_SALTY Glutamate/aartate periplasmic-binding protein | 11 |                       | ALFKAPNDK                          | 290 | 9  | 5  | 28.11  | b8°b8y3y5*y5                                                                                    | 1003.56 | 65.358  | 4843   | 2 | 502.29  | 7.36   |
| Q9ZF60 GLTI_SALTY Glutamate/aartate periplasmic-binding protein | 12 | Carbamidomethyl+C(21) | AKKPDNWEIVGKPQSQEAYGCMRL           | 215 | 24 | 3  | 11.71  | b7b11y5                                                                                         | 2805.39 | 91.024  | 2505   | 3 | 935.80  | 2.18   |
| Q9ZF60 GLTI_SALTY Glutamate/aartate periplasmic-binding protein | 13 |                       | AVAFMMDDALLAGERAK                  | 198 | 17 | 3  | 14.67  | b10b13y11                                                                                       | 1808.91 | 64.389  | 1538   | 2 | 904.96  | 5.87   |
| Q9ZF60 GLTI_SALTY Glutamate/aartate periplasmic-binding protein | 14 | Phohoryl STY(27)      | LTTAMLVMGLSAGLAHAEDGAP AAGSTLDK    | 5   | 30 | 3  | 10.94  | b26y3y8_HPO3 y8                                                                                 | 2949.43 | 138.426 | 3298   | 3 | 983.81  | 8.94   |
| P0AA07 PTHP_SALTY Phohocarrier protein HPr                      | 1  |                       | MFQQEVTITAPNGLHTRPAAQFVK           | 0   | 24 | 25 | 140.36 | b2b3*b3b4b6b7°b7b10°b10°b10b11°b11°b11b12b13y1y3y10y13y14y15y16y18y19y24                        | 2684.38 | 64.471  | 504139 | 4 | 671.85  | -6.37  |
| P0AA07 PTHP_SALTY Phohocarrier protein HPr                      | 2  |                       | GFTSEITVTSNGK                      | 27  | 13 | 5  | 27.87  | b2y4y8y11y13                                                                                    | 1340.67 | 51.542  | 25038  | 2 | 670.84  | 3.10   |
| P0AA07 PTHP_SALTY Phohocarrier protein HPr                      | 3  |                       | LMAELE                             | 79  | 6  | 7  | 62.01  | b3b4b5y3°y3y4°y4                                                                                | 705.35  | 55.240  | 286478 | 1 | 705.35  | -5.37  |
| P0AA07 PTHP_SALTY Phohocarrier protein HPr                      | 4  |                       | LQTLGLTQGTVVTTISAEGEDEQK           | 49  | 23 | 5  | 11.96  | b7y6y11°y11*y11                                                                                 | 2417.19 | 65.370  | 85850  | 3 | 806.40  | -19.90 |
| P0AA07 PTHP_SALTY Phohocarrier protein HPr                      | 5  |                       | LQTLGLTQGTVVTTISAEGEDEQKA VEHLVK   | 49  | 30 | 32 | 223.28 | b3°b3*b3b4°b4b5b6°b6°b6b10°b10b11°b11y3y5y10y11°y11y13°y13y14°y14y15y16y17y18y19y20y22y24y26y28 | 3193.67 | 82.254  | 430704 | 4 | 799.17  | -6.50  |
| P0AA07 PTHP_SALTY Phohocarrier protein HPr                      | 6  |                       | EAKGFTSEITVTSNGK                   | 24  | 16 | 3  | 23.13  | y6y9y11                                                                                         | 1668.85 | 60.862  | 2153   | 2 | 834.93  | 2.27   |
| P0AA07 PTHP_SALTY Phohocarrier protein HPr                      | 7  |                       | MFQQEVTITAPNGLHTRPAAQF             | 0   | 22 | 9  | 39.6   | y5*y5y7°y7y8*y8y12y13°y13                                                                       | 2457.21 | 64.403  | 7631   | 3 | 819.74  | -11.53 |
| P0AA07 PTHP_SALTY Phohocarrier protein HPr                      | 8  |                       | MFQQEVT                            | 0   | 7  | 1  | 8.95   | y4                                                                                              | 882.40  | 64.433  | 2902   | 1 | 882.40  | -5.33  |
| P10370 HISX_SALTY Histidinol dehydrogenase                      | 1  |                       | AGFSALASTIETLAAER                  | 397 | 18 | 13 | 70.62  | b7b8b12°b12b14b16y2y3y4y5°y5y7y18                                                               | 1778.93 | 103.699 | 111815 | 2 | 889.97  | 3.23   |
| P10370 HISX_SALTY Histidinol dehydrogenase                      | 2  |                       | VTPEEIAAAGAR                       | 67  | 12 | 8  | 78.14  | b8y5y6y7y8y9y10y12                                                                              | 1184.62 | 50.275  | 82655  | 2 | 592.82  | -3.09  |
| P10370 HISX_SALTY Histidinol dehydrogenase                      | 3  |                       | NIETFHSAQTLPPVDVETQPGVR            | 93  | 23 | 4  | 20.99  | b11y11y12y23                                                                                    | 2535.29 | 63.231  | 57994  | 3 | 845.77  | 0.77   |
| P10370 HISX_SALTY Histidinol dehydrogenase                      | 4  | Carbamidomethyl+C(5)  | DLAQCVAINSQYGEHLIIQTR              | 311 | 22 | 8  | 25.95  | b2b4b8b9°b9y11y14y22                                                                            | 2526.29 | 76.186  | 47311  | 3 | 842.77  | 6.86   |
| P10370 HISX_SALTY Histidinol dehydrogenase                      | 5  | Carbamidomethyl+C(1)  | CQQVTRPVSSVGLYPGGSAPLFS TVLMLATPAR | 116 | 34 | 21 | 90.1   | b2b4°b4b6°b6b7b8°b8b9°b9b12°b12°b12b14y1y2y3y4y5y6°y6                                           | 3573.90 | 113.324 | 29349  | 3 | 1191.97 | 3.42   |
| P10370 HISX_SALTY Histidinol dehydrogenase                      | 6  | Carbamidomethyl+C(11) | SFNTLIDWNSCEQQR                    | 1   | 17 | 11 | 44.52  | b6°b6°b6y2y3y5°y5y6y10y12y17                                                                    | 2081.96 | 75.398  | 28481  | 2 | 1041.48 | 12.55  |
| P10370 HISX_SALTY Histidinol dehydrogenase                      | 7  |                       | QLAELPR                            | 287 | 7  | 5  | 37.9   | b3°b3y3y5y7                                                                                     | 826.47  | 44.968  | 15380  | 2 | 413.74  | -11.08 |

|                                                               |    |                  |                                                                  |     |    |    |       |                                  |         |         |       |   |         |        |
|---------------------------------------------------------------|----|------------------|------------------------------------------------------------------|-----|----|----|-------|----------------------------------|---------|---------|-------|---|---------|--------|
| [P10370]HISX_SALTY Histidinol dehydrogenase                   | 8  |                  | QVSQR                                                            | 219 | 5  | 3  | 24.61 | b4°b4y4                          | 617.34  | 44.072  | 17725 | 1 | 617.34  | 11.07  |
| [P10370]HISX_SALTY Histidinol dehydrogenase                   | 9  |                  | VAEAVER                                                          | 280 | 7  | 5  | 37.9  | y4°y4y5y6°y6                     | 773.41  | 54.652  | 16983 | 1 | 773.41  | -10.89 |
| [P10370]HISX_SALTY Histidinol dehydrogenase                   | 10 |                  | LDGAAIDMPAGPSEVLVIADSGAT<br>PDFVASDLLSQAHEGPDQSQVILLT<br>PDADIAR | 224 | 55 | 7  | 47.09 | b4b7y3y4y5y7y8                   | 5541.79 | 113.814 | 7302  | 4 | 1386.20 | 4.85   |
| [P10370]HISX_SALTY Histidinol dehydrogenase                   | 11 |                  | MTVQELSK                                                         | 389 | 8  | 3  | 30.62 | b4y5y6                           | 935.50  | 56.879  | 5707  | 2 | 468.25  | 16.31  |
| [P10370]HISX_SALTY Histidinol dehydrogenase                   | 12 |                  | LSDELK                                                           | 79  | 6  | 1  | 12.8  | b5                               | 704.38  | 23.062  | 2214  | 1 | 704.38  | 2.08   |
| [P10370]HISX_SALTY Histidinol dehydrogenase                   | 13 |                  | VDKIFGPGNAFVTEAK                                                 | 202 | 16 | 7  | 38.12 | b14y6y8y11°y11y13*y13            | 1692.91 | 65.417  | 16488 | 2 | 846.96  | 9.30   |
| [P10370]HISX_SALTY Histidinol dehydrogenase                   | 14 |                  | LSDELKQAMTAAVK                                                   | 79  | 14 | 3  | 22.81 | b5b6y6                           | 1504.79 | 60.802  | 14166 | 2 | 752.90  | -9.98  |
| [P10370]HISX_SALTY Histidinol dehydrogenase                   | 15 |                  | GDDALREYSAK                                                      | 46  | 11 | 9  | 48.48 | b5°b5b6°b6b7°b7y6°y6y9           | 1224.59 | 63.657  | 8028  | 2 | 612.80  | -0.10  |
| [P10370]HISX_SALTY Histidinol dehydrogenase                   | 16 |                  | FDKTEVTALR                                                       | 57  | 10 | 3  | 24.62 | b4b8y7                           | 1179.63 | 43.941  | 2058  | 2 | 590.32  | -5.80  |
| [P10370]HISX_SALTY Histidinol dehydrogenase                   | 17 | Phohoryl STY(4)  | ALLTRPAISASDSITR                                                 | 18  | 16 | 3  | 15.43 | b4b8y11                          | 1751.91 | 118.129 | 2845  | 2 | 876.46  | 10.45  |
| [Q9L9I8]THIE_SALTY Thiamine-phohate pyrophohorylase           | 1  |                  | QMPSAPQGLAQLASHIER                                               | 137 | 18 | 8  | 33.61 | b2b5y2y6y11*y11y13y16            | 1933.98 | 76.140  | 32989 | 3 | 645.33  | -8.21  |
| [Q9L9I8]THIE_SALTY Thiamine-phohate pyrophohorylase           | 2  |                  | LGLYPVVDSVEWIER                                                  | 12  | 15 | 7  | 36.27 | b13y2y4y7y8y11y15                | 1774.95 | 95.875  | 28870 | 2 | 887.98  | 7.63   |
| [Q9L9I8]THIE_SALTY Thiamine-phohate pyrophohorylase           | 3  |                  | MYQPDPFPTVPFR                                                    | 0   | 12 | 8  | 56.54 | b2b3y3y6y9°y9y11y12              | 1497.74 | 78.816  | 20456 | 2 | 749.37  | 11.33  |
| [Q9L9I8]THIE_SALTY Thiamine-phohate pyrophohorylase           | 4  |                  | LADYPTVAIGGISLER                                                 | 155 | 16 | 6  | 25.69 | b6b8°b8b9y12y16                  | 1674.92 | 78.945  | 18334 | 2 | 837.96  | 5.32   |
| [Q9L9I8]THIE_SALTY Thiamine-phohate pyrophohorylase           | 5  |                  | LFINDYWR                                                         | 65  | 8  | 5  | 45.93 | b7y4y5y6y8                       | 1126.57 | 78.750  | 15619 | 2 | 563.79  | -0.54  |
| [Q9L9I8]THIE_SALTY Thiamine-phohate pyrophohorylase           | 6  |                  | APAVLATGVGSIJVVSAITQAAD<br>WR                                    | 171 | 25 | 3  | 21.98 | y6y7y11                          | 2424.29 | 112.205 | 2888  | 2 | 1212.65 | -15.41 |
| [Q9L9I8]THIE_SALTY Thiamine-phohate pyrophohorylase           | 7  |                  | QMPSAPQGLAQLASHIERLADYPT<br>VAIGGISLER                           | 137 | 34 | 6  | 22.85 | b8b9°b9b12°b12*b12               | 3589.90 | 113.326 | 2015  | 3 | 1197.31 | 6.19   |
| [Q8ZQS2]GPMA_SALTY 2                                          | 1  |                  | VIPYWNDITLPR                                                     | 160 | 12 | 7  | 54.74 | b3b8y5y7y8y9y12                  | 1486.81 | 82.462  | 67560 | 2 | 743.91  | 3.28   |
| [Q8ZQS2]GPMA_SALTY 2                                          | 2  |                  | VIIAAHGNSLR                                                      | 178 | 11 | 10 | 76.8  | y4*y4y5y6°y6*y6y7y8y9y11         | 1150.66 | 38.646  | 39375 | 2 | 575.84  | -5.52  |
| [Q8ZQS2]GPMA_SALTY 2                                          | 3  |                  | AAAVANQGK                                                        | 239 | 9  | 3  | 28.11 | b7b8y5                           | 829.47  | 61.958  | 13120 | 1 | 829.47  | 21.41  |
| [Q8ZQS2]GPMA_SALTY 2                                          | 4  |                  | EEGFSFDFAYTSVLK                                                  | 46  | 15 | 4  | 16.31 | b4b14y13°y13                     | 1739.82 | 71.013  | 8878  | 3 | 580.61  | 3.37   |
| [Q8ZQS2]GPMA_SALTY 2                                          | 5  |                  | GVSEAK                                                           | 33  | 6  | 2  | 12.8  | b5°b5                            | 590.32  | 29.327  | 8382  | 1 | 590.32  | 1.03   |
| [Q8ZQS2]GPMA_SALTY 2                                          | 6  |                  | FTGWYDVDLSEK                                                     | 21  | 12 | 3  | 24.15 | b4y7y8                           | 1459.69 | 31.972  | 7441  | 3 | 487.24  | 14.05  |
| [Q8ZQS2]GPMA_SALTY 2                                          | 7  |                  | LVLVR                                                            | 5   | 5  | 1  | 12.3  | y4                               | 599.43  | 45.469  | 6499  | 1 | 599.43  | 8.04   |
| [Q8ZQS2]GPMA_SALTY 2                                          | 8  |                  | YLDNMSDEILELNIPITGVPLVYEF<br>DENFKPLK                            | 193 | 33 | 6  | 21.84 | b4b6y8°y8y9y13                   | 3884.96 | 95.527  | 4301  | 5 | 777.80  | 11.44  |
| [Q8ZQS2]GPMA_SALTY 2                                          | 9  |                  | AETAKEYGDEQVK                                                    | 100 | 13 | 3  | 18.63 | b3b10y5                          | 1467.72 | 58.242  | 5944  | 3 | 489.91  | 14.80  |
| [Q8ZQS2]GPMA_SALTY 2                                          | 10 |                  | FTGWYDVDLSEKGVSEAK                                               | 21  | 18 | 4  | 14.03 | b4b13°b13y3                      | 2030.97 | 103.658 | 5420  | 2 | 1015.99 | 0.18   |
| [Q8ZQS2]GPMA_SALTY 2                                          | 11 |                  | HYGALQGLNKAETAEK                                                 | 90  | 16 | 12 | 41.47 | b5b6°b6b8°b8y6°y6y8°y8*y8y10°y10 | 1729.86 | 63.643  | 5289  | 2 | 865.43  | -14.61 |
| [Q8ZQS2]GPMA_SALTY 2                                          | 12 | Phohoryl STY(14) | LLKEEGFSDFAYTSVLK                                                | 43  | 18 | 7  | 26.68 | b10°b10b12°b12y5y6°y6            | 2174.04 | 122.797 | 2258  | 3 | 725.35  | 3.26   |
| [Q8ZQS2]GPMA_SALTY 2                                          | 13 |                  | IAAHGNSLR                                                        | 180 | 9  | 0  | 2.98  |                                  | 938.51  | 38.626  | 38719 | 2 | 469.76  | -8.58  |
| [P0A2C9]FABG_SALTY 3-oxoacyl-[acyl-carrier-protein] reductase | 1  |                  | IITIGSVVGTMGNAGQANYAAAK                                          | 132 | 23 | 9  | 43.35 | b2b3b16y9y10y14y15y20y23         | 2207.13 | 101.367 | 31315 | 3 | 736.38  | -7.52  |
| [P0A2C9]FABG_SALTY 3-oxoacyl-[acyl-carrier-protein] reductase | 2  |                  | AGILAQVPAGR                                                      | 197 | 11 | 7  | 51.94 | b3y2y4y5y6y7y11                  | 1052.61 | 52.778  | 21395 | 2 | 526.81  | -12.18 |
| [P0A2C9]FABG_SALTY 3-oxoacyl-[acyl-carrier-protein] reductase | 3  |                  | IALVTGASR                                                        | 6   | 9  | 6  | 35.89 | b2y6°y6y7°y7y8                   | 887.52  | 43.306  | 14638 | 2 | 444.26  | -12.72 |



|                                                               |    |                                           |                                            |     |    |    |        |                                             |         |         |       |   |         |        |
|---------------------------------------------------------------|----|-------------------------------------------|--------------------------------------------|-----|----|----|--------|---------------------------------------------|---------|---------|-------|---|---------|--------|
| [P0A2C9]FABG_SALTY 3-oxoacyl-[acyl-carrier-protein] reductase | 4  |                                           | GLMLNVTDPASIESVLENIR                       | 54  | 20 | 5  | 20.34  | b6y7y10y14*y14                              | 2171.09 | 84.604  | 4660  | 3 | 724.37  | -20.24 |
| [P0A2C9]FABG_SALTY 3-oxoacyl-[acyl-carrier-protein] reductase | 5  |                                           | DNLLMR                                     | 91  | 6  | 3  | 25.1   | b3b4*b4                                     | 761.39  | 64.433  | 2684  | 1 | 761.39  | -14.11 |
| [P0A2C9]FABG_SALTY 3-oxoacyl-[acyl-carrier-protein] reductase | 6  |                                           | VIGTATSENGAKNISDYLGANGK                    | 31  | 23 | 3  | 11.96  | b3b12y9                                     | 2280.17 | 91.181  | 6695  | 3 | 760.73  | 10.17  |
| [P0A2C9]FABG_SALTY 3-oxoacyl-[acyl-carrier-protein] reductase | 7  |                                           | GLMLNVTDPASIESVLENIRAIEFG<br>EVDILVNNAGITR | 54  | 37 | 14 | 63.39  | b3b7b9*b9b11*b11*b11b1<br>2b13*b13y7°y7y8y9 | 3970.02 | 136.426 | 5862  | 4 | 993.26  | -10.45 |
| [P0A2C9]FABG_SALTY 3-oxoacyl-[acyl-carrier-protein] reductase | 8  | Oxidation+M(16)                           | GITVNVVAPGFIETDMTR                         | 172 | 18 | 8  | 45.12  | b3°b3y3y7y9°y9y10y11                        | 1936.01 | 122.889 | 1675  | 2 | 968.51  | 12.23  |
| [P0A2E1]GLYA_SALTY Serine hydroxymethyltransferase            | 1  |                                           | LNSAVFPSAQGGPLMHVIAGK                      | 251 | 21 | 11 | 42.63  | b2*b2b4°b4b10*b10y3y4y<br>14y15y21          | 2094.11 | 79.219  | 67010 | 3 | 698.71  | -4.90  |
| [P0A2E1]GLYA_SALTY Serine hydroxymethyltransferase            | 2  |                                           | VMQAQGSQLTNK                               | 42  | 12 | 16 | 125.81 | b2b3b9b10y2y3y4y5y6y7y<br>8*y8y9y10*y10y12  | 1304.66 | 30.843  | 46852 | 2 | 652.83  | -4.49  |
| [P0A2E1]GLYA_SALTY Serine hydroxymethyltransferase            | 3  |                                           | FVTSGIR                                    | 354 | 9  | 6  | 55.72  | b3b5y5y6y7y9                                | 963.52  | 50.101  | 38072 | 2 | 482.26  | -5.70  |
| [P0A2E1]GLYA_SALTY Serine hydroxymethyltransferase            | 4  |                                           | EMNIADYDAELWQAMEQEK                        | 4   | 19 | 4  | 22.66  | y4y6y7y19                                   | 2314.02 | 93.334  | 17654 | 2 | 1157.52 | 10.45  |
| [P0A2E1]GLYA_SALTY Serine hydroxymethyltransferase            | 5  |                                           | YAEGYPGK                                   | 54  | 8  | 3  | 33.63  | b3b7y5                                      | 884.43  | 61.459  | 24941 | 2 | 442.72  | 17.12  |
| [P0A2E1]GLYA_SALTY Serine hydroxymethyltransferase            | 6  |                                           | LYNIVPYGIDESGK                             | 138 | 14 | 6  | 35.28  | b9b11°b11y5y8y9                             | 1567.83 | 69.599  | 8999  | 2 | 784.42  | 20.56  |
| [P0A2E1]GLYA_SALTY Serine hydroxymethyltransferase            | 7  |                                           | NSVPNDPKFVTSGIR                            | 346 | 17 | 8  | 47.28  | b3°b3b5b13y8y9y11y14                        | 1814.92 | 53.255  | 36960 | 3 | 605.65  | -10.09 |
| [P0A2E1]GLYA_SALTY Serine hydroxymethyltransferase            | 8  | Carbamidomethyl+C(5)                      | VLDICARFPVYA                               | 405 | 12 | 4  | 20.17  | b8°b8y5y11                                  | 1423.76 | 60.801  | 23661 | 3 | 475.26  | 13.38  |
| [P0A2E1]GLYA_SALTY Serine hydroxymethyltransferase            | 9  |                                           | GYKVVSOGGTENHLFLDLVDK                      | 305 | 21 | 4  | 12.6   | b10y11*y11y13                               | 2304.21 | 102.017 | 20337 | 2 | 1152.61 | -5.30  |
| [P0A2E1]GLYA_SALTY Serine hydroxymethyltransferase            | 10 |                                           | MIIGGFSAYSGVVDWAKMR                        | 168 | 19 | 4  | 21.28  | b3b5b13y6                                   | 2088.03 | 102.156 | 13149 | 3 | 696.68  | -3.39  |
| [P0A2E1]GLYA_SALTY Serine hydroxymethyltransferase            | 11 |                                           | ANITVNKNSVPNDPK                            | 339 | 15 | 4  | 16.31  | b5y5*y5y7                                   | 1610.83 | 35.060  | 5902  | 3 | 537.61  | -14.63 |
| [P0A2E1]GLYA_SALTY Serine hydroxymethyltransferase            | 12 |                                           | LYNIVPYGIDESGKIDYDEMAK                     | 138 | 22 | 5  | 22.13  | y4y5°y5y11°y11                              | 2533.24 | 138.143 | 3636  | 3 | 845.09  | 10.70  |
| [P0A2E1]GLYA_SALTY Serine hydroxymethyltransferase            | 13 |                                           | EHKPKMIIGGFSAYSGVVDWAK                     | 163 | 22 | 3  | 12.26  | b4y8y10                                     | 2420.25 | 105.322 | 1689  | 4 | 605.82  | 4.34   |
| [P0A2E1]GLYA_SALTY Serine hydroxymethyltransferase            | 14 | Oxidation+M(15)                           | LNSAVFPSAQGGPLMHVIAGK                      | 251 | 21 | 4  | 21.05  | b3°b3b4y3                                   | 2110.09 | 85.639  | 35027 | 3 | 704.03  | -10.88 |
| [P0A2E1]GLYA_SALTY Serine hydroxymethyltransferase            | 15 | Carbamidomethyl+C(12)<br>;Oxidation+M(11) | EAEVKELAGWMCDVLDNINDEAT<br>IER             | 375 | 26 | 8  | 23.84  | b6°b6b7°b7y3°y3y10*y10                      | 3036.40 | 80.384  | 8674  | 4 | 759.86  | 3.86   |
| [P0A2E1]GLYA_SALTY Serine hydroxymethyltransferase            | 16 | Oxidation+M(8)                            | AVALKEAMEPEFK                              | 272 | 13 | 5  | 26.74  | b3b12y3°y3y12                               | 1478.75 | 66.035  | 3436  | 2 | 739.88  | -3.38  |
| [Q8ZLJ2]GREB_SALTY Transcription elongation factor greB       | 1  |                                           | KDYISIDMAR                                 | 114 | 12 | 6  | 46.24  | b9b10b11y5°y5y8                             | 1395.69 | 51.803  | 8932  | 2 | 698.35  | -4.90  |
| [Q8ZLJ2]GREB_SALTY Transcription elongation factor greB       | 2  |                                           | QELNYLWREERPEVTK                           | 15  | 16 | 3  | 13.54  | b7°b7b9                                     | 2090.09 | 89.376  | 5152  | 2 | 1045.55 | 10.40  |
| [Q8ZLJ2]GREB_SALTY Transcription elongation factor greB       | 3  |                                           | IVGYDEIFGR                                 | 104 | 10 | 6  | 37.9   | b3b5y6°y6y7°y7                              | 1168.58 | 65.299  | 5179  | 2 | 584.79  | -16.30 |
| [Q8ZLJ2]GREB_SALTY Transcription elongation factor greB       | 4  |                                           | DYISIDMAR                                  | 115 | 11 | 7  | 43.71  | b7°b7b9y4y5°y5y7                            | 1267.62 | 63.678  | 2572  | 2 | 634.31  | 13.58  |

|                                                        |    |                      |                                 |     |    |    |       |                                  |         |         |        |   |         |        |
|--------------------------------------------------------|----|----------------------|---------------------------------|-----|----|----|-------|----------------------------------|---------|---------|--------|---|---------|--------|
| Q8ZLJ2 GREB_SALTY Transcription elongation factor greB | 5  |                      | VTWAASLGDR                      | 32  | 10 | 5  | 36.13 | b5b7y3y5°y5                      | 1075.54 | 105.397 | 1638   | 1 | 1075.54 | -15.55 |
| Q8ZLJ2 GREB_SALTY Transcription elongation factor greB | 6  |                      | KDYISIDMAR                      | 114 | 12 | 4  | 41.9  | y4y7y8y10                        | 1395.68 | 136.481 | 2722   | 1 | 1395.68 | -10.93 |
| Q8ZLJ2 GREB_SALTY Transcription elongation factor greB | 7  | Carbamidomethyl+C(1) | CMENLKIVDYQQEGK                 | 67  | 17 | 12 | 52.43 | b9°b9b12°b12y5y6°y6y7*y7y9°y9y13 | 2038.97 | 124.371 | 1646   | 3 | 680.33  | 5.93   |
| Q8ZLJ2 GREB_SALTY Transcription elongation factor greB | 8  | Phohoryl STY(7)      | EERPEVTKK                       | 23  | 9  | 5  | 55.72 | b3_H3PO4 b3b6y4y6y7              | 1195.58 | 64.431  | 82056  | 2 | 598.29  | 13.38  |
| Q8ZQT5 TOLB_SALTY Protein tolB                         | 1  |                      | SNNTEPTWFPDSQTLAFTSDQAGRPQVYK   | 287 | 29 | 9  | 27.94 | b2*b2b4b5°b5y12y20y24y29         | 3285.56 | 78.471  | 35365  | 3 | 1095.86 | 5.80   |
| Q8ZQT5 TOLB_SALTY Protein tolB                         | 2  |                      | WAGPGAAPEDIGGIVAADLR            | 43  | 20 | 7  | 22.97 | b13y2y5°y5y13y14y20              | 1936.00 | 86.323  | 30147  | 2 | 968.51  | 6.05   |
| Q8ZQT5 TOLB_SALTY Protein tolB                         | 3  |                      | SALVIQTLANGAVR                  | 223 | 14 | 8  | 44.68 | b3°b3y2y5y6°y6y8y9               | 1412.82 | 71.829  | 15400  | 2 | 706.91  | -1.04  |
| Q8ZQT5 TOLB_SALTY Protein tolB                         | 4  |                      | MNINGGAAQR                      | 316 | 10 | 4  | 36.93 | b4y6y7y9                         | 1031.50 | 28.917  | 15326  | 2 | 516.25  | -4.62  |
| Q8ZQT5 TOLB_SALTY Protein tolB                         | 5  |                      | YAGHTASDEVFEK                   | 142 | 13 | 6  | 43.45 | b2b3y6y8y9y10                    | 1453.68 | 63.694  | 6431   | 2 | 727.34  | 12.76  |
| Q8ZQT5 TOLB_SALTY Protein tolB                         | 6  |                      | IAYVVQTNGGQFPYELR               | 166 | 17 | 3  | 14.67 | b14y6y14                         | 1954.99 | 82.602  | 4047   | 2 | 978.00  | -6.43  |
| Q8ZQT5 TOLB_SALTY Protein tolB                         | 7  |                      | TGSLNLYVMDLASGQIR               | 264 | 17 | 4  | 14.67 | b8b14*b14y14                     | 1837.92 | 80.295  | 1747   | 2 | 919.47  | -12.35 |
| Q8ZQT5 TOLB_SALTY Protein tolB                         | 8  |                      | QVASFPR                         | 237 | 7  | 7  | 62.51 | b5b6°b6°b6y3y4y5                 | 804.42  | 39.460  | 9073   | 2 | 402.72  | -16.16 |
| Q8ZQT5 TOLB_SALTY Protein tolB                         | 9  |                      | HNGAPAFDGTK                     | 244 | 13 | 4  | 29.38 | b4b5b11y8                        | 1298.59 | 44.291  | 5935   | 3 | 433.53  | -20.30 |
| Q8ZQT5 TOLB_SALTY Protein tolB                         | 10 |                      | QWLR                            | 138 | 4  | 1  | 11.81 | b3                               | 602.35  | 31.105  | 3967   | 1 | 602.35  | 12.16  |
| Q8ZQT5 TOLB_SALTY Protein tolB                         | 11 |                      | QPLMAWDGSK                      | 197 | 16 | 8  | 66.57 | b4b6y4y5y6y9y12y13               | 1684.81 | 73.947  | 2329   | 3 | 562.28  | 6.96   |
| Q8ZQT5 TOLB_SALTY Protein tolB                         | 12 |                      | LPATDGQVKAWYL                   | 413 | 17 | 4  | 23.59 | b10y5y7y9                        | 1829.95 | 90.804  | 8859   | 2 | 915.48  | 2.74   |
| Q8ZQT5 TOLB_SALTY Protein tolB                         | 13 |                      | IAYVVQTNGGQFPYELRVSDYDGYNQFVVHR | 166 | 31 | 5  | 20.56 | b9°b9y8y9y19                     | 3634.79 | 113.320 | 8183   | 3 | 1212.27 | 5.17   |
| Q8ZQT5 TOLB_SALTY Protein tolB                         | 14 |                      | ARLPATDGQVK                     | 411 | 11 | 3  | 33.87 | b3b7b9                           | 1155.63 | 30.604  | 5991   | 2 | 578.32  | -14.26 |
| Q8ZQT5 TOLB_SALTY Protein tolB                         | 15 |                      | TGSLNLYVMDLASGQIRQITDGR         | 264 | 23 | 3  | 11.96 | b5b11y3                          | 2508.32 | 74.971  | 2794   | 2 | 1254.66 | 12.26  |
| Q8ZQT5 TOLB_SALTY Protein tolB                         | 16 |                      | VIQTLANGAVR                     | 226 | 11 | 0  | 4.47  |                                  | 1141.66 | 71.894  | 29643  | 2 | 571.33  | -10.91 |
| Q8ZQT5 TOLB_SALTY Protein tolB                         | 17 |                      | WAGPGAAPEDIGGIVAAD              | 43  | 18 | 2  | 12.47 | y13y16                           | 1666.81 | 86.329  | 2911   | 3 | 556.28  | 2.71   |
| P61179 RL22_SALTY 50S ribosomal protein L22            | 1  |                      | IFVDEGPSMK                      | 73  | 10 | 10 | 69.31 | b2b4y2y4y5y6°y6y8y9y10           | 1122.55 | 51.936  | 91737  | 2 | 561.78  | -1.85  |
| P61179 RL22_SALTY 50S ribosomal protein L22            | 2  |                      | VLESAIANAEHNDGADIDDLK           | 49  | 21 | 3  | 22.26 | y3y6y7                           | 2210.05 | 88.954  | 4855   | 4 | 553.27  | -4.86  |
| P61179 RL22_SALTY 50S ribosomal protein L22            | 3  |                      | LVADLIR                         | 18  | 7  | 6  | 59.5  | b4°b4y3y4y5y6                    | 799.49  | 58.192  | 105751 | 2 | 400.25  | -21.15 |
| P61179 RL22_SALTY 50S ribosomal protein L22            | 4  |                      | ETIAK                           | 1   | 5  | 2  | 24.61 | b3b4                             | 561.32  | 29.287  | 12641  | 1 | 561.32  | 0.43   |
| P61179 RL22_SALTY 50S ribosomal protein L22            | 5  |                      | VLESAIANAEHNDGADIDDLKVT<br>K    | 49  | 24 | 3  | 11.71 | b6y3y11                          | 2538.24 | 62.157  | 75382  | 4 | 635.32  | -11.83 |
| P61179 RL22_SALTY 50S ribosomal protein L22            | 6  |                      | VSQALDILTYTNKK                  | 28  | 14 | 3  | 17.37 | b3b11y3                          | 1593.89 | 67.285  | 68054  | 2 | 797.45  | 3.60   |

|                                                      |   |                                            |                                  |     |    |    |       |                                                          |         |         |       |   |         |        |
|------------------------------------------------------|---|--------------------------------------------|----------------------------------|-----|----|----|-------|----------------------------------------------------------|---------|---------|-------|---|---------|--------|
| P61179 RL22_SALTY 50S ribosomal protein L22          | 7 | Phohoryl STY(9)                            | VSQALDILTYTNKK                   | 28  | 14 | 6  | 44.68 | b9y5*y5y7y10y13                                          | 1673.86 | 85.284  | 6986  | 2 | 837.43  | 11.16  |
| P22107 TRAT_SALTY TraT complement resistance protein | 1 |                                            | ATVTTDNVAALR                     | 177 | 12 | 7  | 37.25 | b8y2y8y9y10*y10y12                                       | 1231.66 | 46.476  | 26820 | 2 | 616.33  | -5.75  |
| P22107 TRAT_SALTY TraT complement resistance protein | 2 |                                            | IQTSTETGNQHK                     | 196 | 12 | 5  | 41.9  | y2y5y6y7y10                                              | 1343.64 | 14.758  | 9152  | 3 | 448.55  | -12.99 |
| P22107 TRAT_SALTY TraT complement resistance protein | 3 |                                            | AYYWIQANVLK                      | 89  | 11 | 5  | 33.87 | b6b7b8y2y11                                              | 1368.73 | 57.879  | 7262  | 2 | 684.87  | -0.09  |
| P22107 TRAT_SALTY TraT complement resistance protein | 4 |                                            | DIQAKGYTVVTDK                    | 74  | 15 | 4  | 26.7  | b6y4y5y13                                                | 1621.83 | 69.517  | 29267 | 2 | 811.42  | -10.01 |
| P22107 TRAT_SALTY TraT complement resistance protein | 5 |                                            | MDLRESQGWLNR                     | 103 | 12 | 10 | 80.32 | b3b4b9b11°b11y4y7y8°y8y11                                | 1504.74 | 63.703  | 8263  | 3 | 502.25  | 2.51   |
| P22107 TRAT_SALTY TraT complement resistance protein | 6 |                                            | NLEVKTQMSQTYWHPVSER              | 31  | 20 | 6  | 22.97 | b12y9y11y12°y12*y12                                      | 2448.14 | 98.967  | 3888  | 2 | 1224.57 | -8.88  |
| P22107 TRAT_SALTY TraT complement resistance protein | 7 |                                            | IQTSTETGNQHXYQTR                 | 196 | 16 | 6  | 23.13 | y8°y8*y8y11y13°y13                                       | 1891.90 | 87.133  | 3467  | 3 | 631.31  | -11.03 |
| P22107 TRAT_SALTY TraT complement resistance protein | 8 | Carbamidomethyl+C(16)<br>;Phohoryl STY(10) | LMMVTLVSSTLALSGCGAMSTAI<br>KK    | 5   | 25 | 14 | 75.3  | b4b5°b5b8°b8b12b24_H3P<br>O4<br>b24y9y10°y10y11y12y14y23 | 2650.32 | 136.430 | 4345  | 3 | 884.11  | 6.54   |
| P22107 TRAT_SALTY TraT complement resistance protein | 9 |                                            | TDNVAALR                         | 181 | 8  | 0  | 3.48  |                                                          | 859.46  | 46.489  | 5204  | 2 | 430.23  | -1.28  |
| Q8ZRC9 YAJQ_SALTY UPF0234 protein yajQ               | 1 |                                            | VLSESDFQVNQLLDILR                | 49  | 17 | 12 | 61.34 | b1b2b8b11b13y1y3y4y5y11y13y17                            | 1989.07 | 105.345 | 38907 | 2 | 995.04  | 2.15   |
| Q8ZRC9 YAJQ_SALTY UPF0234 protein yajQ               | 2 |                                            | GIEGASLDVPDEFVHSGK               | 72  | 18 | 4  | 22.36 | b6y3y5y9                                                 | 1856.89 | 67.932  | 28075 | 3 | 619.64  | -6.44  |
| Q8ZRC9 YAJQ_SALTY UPF0234 protein yajQ               | 3 |                                            | QGIESAVQK                        | 99  | 9  | 5  | 28.11 | b3y6y8*y8y9                                              | 959.52  | 31.162  | 6741  | 2 | 480.26  | 2.86   |
| Q8ZRC9 YAJQ_SALTY UPF0234 protein yajQ               | 4 |                                            | TWYVEAK                          | 90  | 7  | 3  | 37.9  | b6y3y5                                                   | 896.46  | 100.250 | 4842  | 1 | 896.46  | 6.13   |
| Q8ZRC9 YAJQ_SALTY UPF0234 protein yajQ               | 5 |                                            | MPSFDIVSEVDLQEAR                 | 0   | 16 | 6  | 39.08 | b11y3y4y5y9*y9                                           | 1835.86 | 50.472  | 2245  | 3 | 612.62  | -14.10 |
| Q8ZRC9 YAJQ_SALTY UPF0234 protein yajQ               | 6 |                                            | GGDLGQPFQFK                      | 148 | 11 | 4  | 29.1  | b7b9b10°b10                                              | 1193.57 | 94.457  | 1679  | 2 | 597.29  | -22.19 |
| Q8ZRC9 YAJQ_SALTY UPF0234 protein yajQ               | 7 |                                            | PSFDIVSEVDLQEARNGVDNAVR          | 1   | 23 | 5  | 33.54 | b8b9y7*y7y8                                              | 2530.27 | 74.969  | 6531  | 3 | 844.10  | 7.24   |
| Q8ZRC9 YAJQ_SALTY UPF0234 protein yajQ               | 8 |                                            | EVESRFDFR                        | 24  | 9  | 3  | 28.11 | b4b8y5                                                   | 1184.56 | 33.382  | 3996  | 2 | 592.78  | -11.85 |
| Q8ZRC9 YAJQ_SALTY UPF0234 protein yajQ               | 9 |                                            | GIEGASLDVPDEFVHSGK               | 72  | 18 | 0  | 6.46  |                                                          | 1838.88 | 67.964  | 13720 | 3 | 613.63  | -2.39  |
| Q56026 SIPD_SALTY Cell invasion protein sipD         | 1 |                                            | SAFSAPTSALFSAMAQPR               | 106 | 20 | 18 | 74.92 | b1b3°b3b7b16y1y3*y3y5*y5y6y8°y8*y8y11y13y14y20           | 2023.97 | 66.091  | 28294 | 2 | 1012.49 | -8.08  |
| Q56026 SIPD_SALTY Cell invasion protein sipD         | 2 |                                            | YNQINSNTVLFPAQSGSGVK             | 204 | 20 | 4  | 17.48 | b5b9y4y10                                                | 2124.09 | 79.062  | 3063  | 3 | 708.70  | 9.88   |
| Q56026 SIPD_SALTY Cell invasion protein sipD         | 3 |                                            | NDLNSLVNK                        | 195 | 9  | 9  | 57.48 | b3b6°b6°b6b7°b7b8°b8y8                                   | 1016.55 | 65.356  | 8737  | 2 | 508.78  | 12.31  |
| Q56026 SIPD_SALTY Cell invasion protein sipD         | 4 |                                            | IHQAAQTLQSTPPISEENNDER           | 54  | 22 | 3  | 22.13 | b4b10b11                                                 | 2535.16 | 61.821  | 5072  | 3 | 845.72  | -19.07 |
| Q56026 SIPD_SALTY Cell invasion protein sipD         | 5 |                                            | YSNANSLYDNLVK                    | 311 | 13 | 3  | 23.4  | b7b8y10                                                  | 1500.75 | 70.618  | 3033  | 2 | 750.88  | 8.46   |
| Q56026 SIPD_SALTY Cell invasion protein sipD         | 6 |                                            | MVQDIDGLGAPGKDSK                 | 263 | 16 | 6  | 15.43 | b5°b5°b5b9°b9y10                                         | 1630.80 | 67.268  | 7733  | 2 | 815.90  | -6.06  |
| Q56026 SIPD_SALTY Cell invasion protein sipD         | 7 |                                            | SGVSLSAEQNENLRSAFSAPTSALFSAMAQPR | 92  | 34 | 6  | 21.68 | b8b13b14°b14y10y14                                       | 3508.68 | 84.599  | 4545  | 4 | 877.92  | -10.37 |
| Q56026 SIPD_SALTY Cell invasion protein sipD         | 8 | Carbamidomethyl+C(20)                      | VATEAEARQWLSELNLPNSCLK           | 224 | 22 | 3  | 12.26 | b4b7y3                                                   | 2529.31 | 108.593 | 2080  | 3 | 843.78  | 14.48  |
| Q56026 SIPD_SALTY Cell invasion protein sipD         | 9 | Phohoryl STY(8)                            | GTDIISLSQAATK                    | 41  | 13 | 6  | 36.37 | b5°b5b6°b6b7y10                                          | 1384.67 | 136.459 | 2054  | 1 | 1384.67 | 7.32   |

|                                                            |    |                       |                                   |     |    |    |        |                                                |         |         |        |   |         |        |
|------------------------------------------------------------|----|-----------------------|-----------------------------------|-----|----|----|--------|------------------------------------------------|---------|---------|--------|---|---------|--------|
| IQ56026 SIPD_SALTY Cell invasion protein sipD              | 10 | Oxidation+M(16)       | SAFSAPTSALFSAMAQPR                | 106 | 20 | 8  | 53.45  | b3b4b7b8y8y11*y11y12                           | 2039.97 | 60.797  | 6624   | 2 | 1020.49 | -6.52  |
| Q56026 SIPD_SALTY Cell invasion protein sipD               | 11 | Oxidation+M(1)        | MGGWLLPGKDGNTVK                   | 173 | 15 | 3  | 16.31  | b6b10y6                                        | 1588.80 | 81.731  | 2178   | 2 | 794.90  | -11.76 |
| P14845 CARA_SALTY Carbamoyl-phosphate synthase small chain | 1  | Carbamidomethyl+C(12) | FLETDIPLFGICLGHQLLALASGAK         | 257 | 25 | 19 | 124.61 | b2b3*b3b4b5*b5b6*b6y2y3y4y5y7y8y19y20y22y23y25 | 2684.45 | 128.391 | 108314 | 3 | 895.49  | -0.36  |
| P14845 CARA_SALTY Carbamoyl-phosphate synthase small chain | 2  |                       | SALLVLEDGTQFHGR                   | 3   | 15 | 7  | 29.07  | b7b13*b13y7y8*y8y15                            | 1642.87 | 125.713 | 23046  | 2 | 821.94  | 6.76   |
| P14845 CARA_SALTY Carbamoyl-phosphate synthase small chain | 3  |                       | DLPLIASNFR                        | 83  | 10 | 4  | 34.62  | y1y4y5y6                                       | 1145.63 | 76.831  | 20302  | 2 | 573.32  | 0.21   |
| P14845 CARA_SALTY Carbamoyl-phosphate synthase small chain | 4  | Carbamidomethyl+C(18) | MNPDGIFLSNGPGDPAPCDYAITAIQK       | 230 | 27 | 10 | 36.21  | b2b8b14*b14y1y11y12y13*y13y27                  | 2862.36 | 83.750  | 11384  | 3 | 954.79  | 5.37   |
| P14845 CARA_SALTY Carbamoyl-phosphate synthase small chain | 5  |                       | NVVMITAQNHGFAVDEDSL PANLR         | 302 | 24 | 7  | 17.54  | b2b4b13*b13b15y2y10                            | 2611.28 | 83.600  | 10280  | 4 | 653.58  | -5.33  |
| P14845 CARA_SALTY Carbamoyl-phosphate synthase small chain | 6  |                       | AFPGLNGMDLAKEVTTAETYR             | 148 | 21 | 5  | 22.52  | b14y5*y5y8y9                                   | 2284.11 | 110.319 | 3274   | 2 | 1142.56 | -5.77  |
| P14845 CARA_SALTY Carbamoyl-phosphate synthase small chain | 7  |                       | SEDDLPHFHV VAYDFGAK               | 185 | 17 | 4  | 24.84  | b14y4y7y8                                      | 1909.91 | 82.735  | 4877   | 3 | 637.31  | 8.82   |
| P14845 CARA_SALTY Carbamoyl-phosphate synthase small chain | 8  |                       | AIGATGSAVGEEVFN TSMTGYQEILTDPSYSR | 18  | 32 | 10 | 47.42  | b3b4b10b12b14b17y3y4y7y9                       | 3321.58 | 96.373  | 3056   | 4 | 831.15  | -4.85  |
| P14845 CARA_SALTY Carbamoyl-phosphate synthase small chain | 9  | Carbamidomethyl+C(6)  | GAQNGCIIAGDDAK                    | 125 | 16 | 7  | 25.02  | b9*b9y7y9y13*y13*y13                           | 1573.76 | 101.960 | 2470   | 3 | 525.26  | 20.94  |
| P14845 CARA_SALTY Carbamoyl-phosphate synthase small chain | 10 |                       | MLVDR                             | 207 | 5  | 1  | 12.3   | b3                                             | 633.33  | 118.698 | 2066   | 1 | 633.33  | -12.72 |
| P14845 CARA_SALTY Carbamoyl-phosphate synthase small chain | 11 |                       | EVTTAETYR                         | 160 | 9  | 7  | 41.66  | b3*b3b4*b4y4y7*y7                              | 1069.53 | 57.276  | 1997   | 2 | 535.27  | 17.46  |
| P14845 CARA_SALTY Carbamoyl-phosphate synthase small chain | 12 |                       | MKFGHHGGNHPVK                     | 285 | 13 | 4  | 23.4   | b5b6y10*y10                                    | 1445.74 | 65.271  | 3889   | 3 | 482.59  | 13.68  |
| P14845 CARA_SALTY Carbamoyl-phosphate synthase small chain | 13 |                       | DGLPEAKSEDDLPHFHV VAYDFGAK        | 178 | 24 | 5  | 24.76  | b9b12b13y5y7                                   | 2620.27 | 111.896 | 2867   | 3 | 874.10  | 6.34   |
| P14845 CARA_SALTY Carbamoyl-phosphate synthase small chain | 14 | Carbamidomethyl+C(7)  | MLVDRGCR                          | 207 | 8  | 3  | 38.4   | y3y4y7                                         | 1006.49 | 88.706  | 2692   | 1 | 1006.49 | -2.00  |
| P14845 CARA_SALTY Carbamoyl-phosphate synthase small chain | 15 |                       | NVVMITAQNHGFAVDEDSL PANLRVTHK     | 302 | 28 | 4  | 22.1   | b5b11b12*b12                                   | 3076.60 | 120.676 | 2370   | 3 | 1026.20 | 11.98  |
| P14845 CARA_SALTY Carbamoyl-phosphate synthase small chain | 16 |                       | RHNIVAIADIDTR                     | 103 | 13 | 4  | 38.42  | y3y5y7y8                                       | 1493.80 | 63.702  | 2106   | 2 | 747.40  | -13.40 |
| P14845 CARA_SALTY Carbamoyl-phosphate synthase small chain | 17 | Phohoryl STY(9)       | LTVVPAQTSAAEVLK                   | 215 | 15 | 4  | 23.05  | b9b11y5y11                                     | 1664.86 | 101.868 | 66108  | 3 | 555.62  | 10.41  |
| P14845 CARA_SALTY Carbamoyl-phosphate synthase small chain | 18 | Phohoryl STY(5)       | WTQGSWTLKDG LPEAK                 | 169 | 16 | 4  | 15.43  | b3*b3y3y13                                     | 1896.91 | 89.337  | 1803   | 3 | 632.97  | 13.39  |
| P14845 CARA_SALTY Carbamoyl-phosphate synthase small chain | 19 | Oxidation+M(18)       | AIGATGSAVGEEVFN TSMTGYQEILTDPSYSR | 18  | 32 | 10 | 33.74  | b5*b5b11b17b30y4y8*y8y9y11                     | 3337.63 | 129.427 | 6619   | 3 | 1113.22 | 12.58  |
| P14845 CARA_SALTY Carbamoyl-phosphate synthase small chain | 20 | Oxidation+M(8)        | AFPGLNGMDLAK                      | 148 | 12 | 8  | 51.28  | b3b7b8y7*y7y9y10*y10                           | 1249.62 | 63.690  | 3140   | 2 | 625.31  | -1.95  |
| Q8ZQR4 6PGL_SALTY 6-phohogluconolactonase                  | 1  | Carbamidomethyl+C(19) | LQDGLPVELVDVVEGLDGCHSANITPDNR     | 110 | 29 | 12 | 60.14  | b2b3y2*y2y3y4y5y7y10y12y24y27                  | 3132.55 | 103.179 | 42091  | 3 | 1044.85 | 7.56   |
| Q8ZQR4 6PGL_SALTY 6-phohogluconolactonase                  | 2  | Carbamidomethyl+C(2)  | ICLFTLSDDGHLVAQEPAE VNTVEGAGPR    | 150 | 29 | 8  | 34.9   | b2y6*y6y7*y7y8*y8y10                           | 3095.52 | 80.405  | 13688  | 3 | 1032.51 | 4.57   |
| Q8ZQR4 6PGL_SALTY 6-phohogluconolactonase                  | 3  |                       | TASLITVFSVSEDGSVLSVEGFQPT EAQPR   | 248 | 30 | 3  | 16.84  | y9y13y20                                       | 3151.58 | 105.187 | 3008   | 3 | 1051.20 | 0.62   |
| Q8ZQR4 6PGL_SALTY 6-phohogluconolactonase                  | 4  |                       | SHHIAVYEITGTQGLLTEK               | 295 | 19 | 7  | 36.14  | b3b5b8*b8y8y9y13                               | 2097.06 | 85.315  | 12213  | 2 | 1049.03 | -17.46 |
| Q8ZQR4 6PGL_SALTY 6-phohogluconolactonase                  | 5  |                       | YAVGQGPMWVVVNAY                   | 316 | 15 | 4  | 26.7   | b4b9b12y13                                     | 1653.83 | 94.534  | 1837   | 2 | 827.42  | 9.89   |
| Q8ZQR4 6PGL_SALTY 6-phohogluconolactonase                  | 6  |                       | WAADIHITPDGR                      | 229 | 12 | 4  | 20.17  | b5*b5b8y3                                      | 1351.66 | 39.359  | 1724   | 2 | 676.33  | -12.10 |
| Q8ZQR4 6PGL_SALTY 6-phohogluconolactonase                  | 7  |                       | GRYAVGQGPMWVVVNAY                 | 314 | 17 | 6  | 40.07  | b7b8b9y8*y8y13                                 | 1866.92 | 105.241 | 55641  | 2 | 933.97  | -4.58  |

|                                               |    |                                                                      |                                                 |     |    |    |       |                             |         |         |        |   |         |        |
|-----------------------------------------------|----|----------------------------------------------------------------------|-------------------------------------------------|-----|----|----|-------|-----------------------------|---------|---------|--------|---|---------|--------|
| Q8ZQR4 6PGL_SALTY 6-phohogluconolactonase     | 8  |                                                                      | GFNIDNSGKYLIAAGQK                               | 278 | 17 | 4  | 22.08 | b3b5b10*b10                 | 1795.92 | 63.698  | 6840   | 3 | 599.31  | -10.06 |
| Q8ZQR4 6PGL_SALTY 6-phohogluconolactonase     | 9  | Phohoryl STY(10)                                                     | SHHIAVYEITGTQGLLTEK                             | 295 | 19 | 6  | 26.11 | b8°b8b12y10y11*y11          | 2177.05 | 116.668 | 4696   | 2 | 1089.03 | -0.34  |
| Q8ZQR4 6PGL_SALTY 6-phohogluconolactonase     | 10 | Phohoryl STY(14)                                                     | IAPDDGALTFAAESALPGTHISTD<br>HHGR                | 64  | 30 | 6  | 35.79 | b13b14y6y7y9y16             | 3121.44 | 72.640  | 2449   | 3 | 1041.15 | 4.85   |
| P66491 RS19_SALTY 30S ribosomal protein S19   | 1  |                                                                      | LGEFAPTR                                        | 70  | 8  | 5  | 50.7  | y4y5y6y7y8                  | 890.46  | 42.962  | 101093 | 2 | 445.74  | -9.12  |
| P66491 RS19_SALTY 30S ribosomal protein S19   | 2  |                                                                      | QHVPVFVSDEMVGHK                                 | 55  | 15 | 5  | 23.05 | b6b10°b10y9y11              | 1708.83 | 56.273  | 22696  | 3 | 570.28  | -12.57 |
| P66491 RS19_SALTY 30S ribosomal protein S19   | 3  |                                                                      | STIFPNMIGLTIAVHNGR                              | 37  | 18 | 9  | 52.95 | b7b8°b8b11b12*b12y4*y4y5    | 1941.01 | 65.375  | 3010   | 2 | 971.01  | -15.28 |
| P66491 RS19_SALTY 30S ribosomal protein S19   | 4  |                                                                      | LGEFAPTRTYR                                     | 70  | 11 | 3  | 33.87 | b3b5b10                     | 1310.67 | 55.219  | 18315  | 2 | 655.84  | -13.13 |
| P66491 RS19_SALTY 30S ribosomal protein S19   | 5  |                                                                      | VEKAVESGDK                                      | 18  | 10 | 6  | 26.38 | b8°b8b9°b9y9°y9             | 1061.54 | 63.708  | 2503   | 2 | 531.27  | -7.36  |
| P66491 RS19_SALTY 30S ribosomal protein S19   | 6  | Oxidation+M(11)                                                      | QHVPVFVSDEMVGHK                                 | 55  | 15 | 5  | 40.25 | b3b11b12b13y6               | 1724.82 | 73.941  | 9727   | 2 | 862.91  | -14.79 |
| P65226 KHSE_SALTY Homoserine kinase           | 1  | Carbamidomethyl+C(13)<br>;Carbamidomethyl+C(26)<br>)                 | NMPIGSLGSSACSVVAALVAMN<br>EHCGKPLNDTR           | 88  | 34 | 8  | 19.55 | b2b17y2y6y9y15y32y34        | 3513.67 | 96.042  | 34970  | 4 | 879.17  | -0.42  |
| P65226 KHSE_SALTY Homoserine kinase           | 2  | Carbamidomethyl+C(24)                                                | QAVSEIGALASGISGPTLFALCD<br>KPETAQR              | 246 | 32 | 9  | 28.92 | b8b17y6y7y9y12°y12*y12y16   | 3231.63 | 90.038  | 19434  | 4 | 808.66  | -1.81  |
| P65226 KHSE_SALTY Homoserine kinase           | 3  |                                                                      | TIPVAMTLEK                                      | 78  | 10 | 5  | 36.13 | b7b9y6y8y10                 | 1102.61 | 60.857  | 19267  | 2 | 551.81  | -5.42  |
| P65226 KHSE_SALTY Homoserine kinase           | 4  |                                                                      | DVIAEPYR                                        | 227 | 8  | 4  | 38.4  | y4y5y7y8                    | 962.49  | 38.690  | 3160   | 2 | 481.75  | -5.64  |
| P65226 KHSE_SALTY Homoserine kinase           | 5  | Carbamidomethyl+C(13)                                                | HYLQNQEGFVHICR                                  | 285 | 14 | 8  | 52.06 | b7b9b11°b11b13y4y8°y8       | 1800.89 | 103.639 | 38813  | 3 | 600.97  | 14.71  |
| P65226 KHSE_SALTY Homoserine kinase           | 6  | Carbamidomethyl+C(7)                                                 | ENIVYQCWER                                      | 61  | 10 | 4  | 39.94 | b8y6y7y8                    | 1396.65 | 59.265  | 12760  | 2 | 698.83  | 15.73  |
| P65226 KHSE_SALTY Homoserine kinase           | 7  |                                                                      | VYAPASSANMSVGFVDLGAAVTP<br>VDGTL LGDVVSVEAADHFR | 3   | 42 | 6  | 36.72 | b14y5y6°y6y8y9              | 4205.04 | 81.227  | 2666   | 4 | 1052.02 | -9.75  |
| P65226 KHSE_SALTY Homoserine kinase           | 8  | Carbamidomethyl+C(9)                                                 | HLAGFIHACYSR                                    | 205 | 12 | 9  | 65.8  | b4b5b7b11°b11y4y10y11°y11   | 1431.70 | 63.690  | 2432   | 2 | 716.35  | 3.07   |
| P65226 KHSE_SALTY Homoserine kinase           | 9  | Carbamidomethyl+C(2)                                                 | FCQALGKTIPVAMTLEK                               | 71  | 17 | 6  | 20.37 | b9°b9b12°b12y3y8            | 1907.01 | 64.390  | 3757   | 2 | 954.01  | 0.70   |
| P65226 KHSE_SALTY Homoserine kinase           | 10 |                                                                      | DVIAEPYRAR                                      | 227 | 10 | 5  | 36.93 | b3b6b7°b7y7                 | 1189.62 | 107.194 | 3629   | 2 | 595.31  | -8.52  |
| P65226 KHSE_SALTY Homoserine kinase           | 11 | Carbamidomethyl+C(13)<br>;Carbamidomethyl+C(26)<br>);Oxidation+M(22) | NMPIGSLGSSACSVVAALVAMN<br>EHCGKPLNDTR           | 88  | 34 | 5  | 12.07 | b9°b9b13y4y10               | 3529.68 | 91.008  | 11174  | 4 | 883.18  | 5.12   |
| P05989 ILVC_SALTY Ketol-acid reductoisomerase | 1  |                                                                      | GFGVPTLIAPHENDPQGEGMAIA<br>K                    | 167 | 25 | 7  | 29.54 | b2b3b4y10y14y21y25          | 2548.29 | 78.119  | 42270  | 3 | 850.10  | -0.38  |
| P05989 ILVC_SALTY Ketol-acid reductoisomerase | 2  |                                                                      | ANYFNTLNL                                       | 1   | 10 | 7  | 48.44 | b3b7b8y1y3y7y10             | 1225.63 | 68.979  | 24274  | 2 | 613.32  | 1.20   |
| P05989 ILVC_SALTY Ketol-acid reductoisomerase | 3  |                                                                      | LIQFGWETITEALK                                  | 252 | 14 | 4  | 17.37 | b11b13y2y13                 | 1648.90 | 106.456 | 20833  | 2 | 824.95  | 0.37   |
| P05989 ILVC_SALTY Ketol-acid reductoisomerase | 4  | Carbamidomethyl+C(6)                                                 | VVIVGCGAQGLNQGLNMR                              | 39  | 18 | 6  | 35.93 | b6b9b11y5y10y12             | 1886.00 | 105.423 | 11702  | 2 | 943.50  | 13.27  |
| P05989 ILVC_SALTY Ketol-acid reductoisomerase | 5  |                                                                      | DGAALGYSHGFNIVEVGEQIR                           | 123 | 21 | 7  | 23.64 | b2b3b5°b5b7y8y13            | 2232.11 | 136.411 | 3662   | 2 | 1116.56 | 0.66   |
| P05989 ILVC_SALTY Ketol-acid reductoisomerase | 6  |                                                                      | LVAEGTDPAYAEK                                   | 239 | 13 | 11 | 76.84 | b7°b7b8°b8b12y4y5y6y8°y8y11 | 1363.70 | 64.430  | 15534  | 2 | 682.35  | 20.50  |
| P05989 ILVC_SALTY Ketol-acid reductoisomerase | 7  |                                                                      | TAFETAPQYEGK                                    | 336 | 12 | 5  | 33.15 | b3b5°b5y4y5                 | 1341.60 | 79.816  | 2765   | 3 | 447.87  | -20.74 |

|                                               |    |                                                      |                                                           |     |    |    |       |                                    |         |         |       |   |         |        |
|-----------------------------------------------|----|------------------------------------------------------|-----------------------------------------------------------|-----|----|----|-------|------------------------------------|---------|---------|-------|---|---------|--------|
| P05989 ILVC_SALTY Ketol-acid reductoisomerase | 8  |                                                      | GYMTDMK                                                   | 478 | 7  | 4  | 37.9  | b4y3°y3y5                          | 845.36  | 71.172  | 2279  | 2 | 423.18  | 4.48   |
| P05989 ILVC_SALTY Ketol-acid reductoisomerase | 9  |                                                      | IGEQEYFDK                                                 | 348 | 9  | 3  | 28.11 | b6y3y6                             | 1128.54 | 78.036  | 1546  | 1 | 1128.54 | 15.90  |
| P05989 ILVC_SALTY Ketol-acid reductoisomerase | 10 |                                                      | AGVLESSFVAEVK                                             | 202 | 13 | 5  | 18.63 | b6b11°b11y9°y9                     | 1335.70 | 69.631  | 1534  | 2 | 668.36  | -9.14  |
| P05989 ILVC_SALTY Ketol-acid reductoisomerase | 11 |                                                      | LLTWREETGK                                                | 326 | 10 | 3  | 26.38 | b9y4y5                             | 1232.68 | 81.631  | 85216 | 2 | 616.84  | 14.85  |
| P05989 ILVC_SALTY Ketol-acid reductoisomerase | 12 |                                                      | FMGRDEFADGASYLQGK                                         | 21  | 17 | 8  | 50.79 | b3b4y7y10°y10y11°y11y12            | 1891.86 | 64.410  | 17375 | 3 | 631.29  | -3.03  |
| P05989 ILVC_SALTY Ketol-acid reductoisomerase | 13 | Carbamidomethyl+C(11)<br>;Carbamidomethyl+C(21)<br>) | SDLMGEQTILCGMLQAGSLLCFD<br>KLVAEGTDPAYAEK                 | 215 | 37 | 5  | 14.65 | b3b7y3y6y9                         | 4031.92 | 118.470 | 13646 | 3 | 1344.65 | 2.79   |
| P05989 ILVC_SALTY Ketol-acid reductoisomerase | 14 |                                                      | LIQFGWETITEALKQGGITLMMDR                                  | 252 | 24 | 3  | 11.71 | b13y8y14                           | 2751.45 | 90.765  | 6229  | 4 | 688.62  | 11.98  |
| P05989 ILVC_SALTY Ketol-acid reductoisomerase | 15 |                                                      | TAFETAPQYEGKIGEQEYFDK                                     | 336 | 21 | 5  | 12.6  | b9y4°y4y10°y10                     | 2451.14 | 93.266  | 5311  | 3 | 817.72  | 0.30   |
| P05989 ILVC_SALTY Ketol-acid reductoisomerase | 16 | Phohoryl STY(3)                                      | LLTWREETGK                                                | 326 | 10 | 3  | 24.62 | b4y4y7                             | 1312.62 | 66.030  | 2469  | 2 | 656.82  | 2.32   |
| P05989 ILVC_SALTY Ketol-acid reductoisomerase | 17 | Oxidation+M(21)                                      | GFGVPTLIAVHPENDPQGEGMAIA<br>K                             | 167 | 25 | 3  | 21.04 | b6y11y12                           | 2564.27 | 109.763 | 1648  | 3 | 855.43  | -6.00  |
| Q7CR87 SURA_SALTY Chaperone surA              | 1  |                                                      | IQELPGIFAQALSTAK                                          | 235 | 16 | 7  | 25.69 | b2°b2b3b4°b4b15y12                 | 1686.94 | 90.743  | 34384 | 2 | 843.97  | -1.23  |
| Q7CR87 SURA_SALTY Chaperone surA              | 2  |                                                      | LNAGQAGQQLPDDATLR                                         | 50  | 17 | 11 | 63.76 | b6b8y4y5y7°y7y9y11°y11y12y17       | 1767.90 | 51.796  | 21043 | 2 | 884.46  | 3.38   |
| Q7CR87 SURA_SALTY Chaperone surA              | 3  |                                                      | ITDEQLDQAIANIAK                                           | 90  | 15 | 10 | 63.77 | b12°b12b13°b13y5y10y12°y12y13y14   | 1642.87 | 81.234  | 19883 | 2 | 821.94  | 5.05   |
| Q7CR87 SURA_SALTY Chaperone surA              | 4  |                                                      | GDIVGPIR                                                  | 252 | 8  | 3  | 38.4  | b3b5b6                             | 826.49  | 37.681  | 7618  | 2 | 413.75  | 15.21  |
| Q7CR87 SURA_SALTY Chaperone surA              | 5  |                                                      | GQSQSISVTEVHAR                                            | 274 | 14 | 5  | 38.66 | b8y5y6y8y10                        | 1498.75 | 37.992  | 7322  | 3 | 500.26  | -5.70  |
| Q7CR87 SURA_SALTY Chaperone surA              | 6  |                                                      | QAESIVEEAR                                                | 197 | 10 | 3  | 24.62 | b7y3y6                             | 1131.54 | 60.034  | 2821  | 2 | 566.27  | -19.31 |
| Q7CR87 SURA_SALTY Chaperone surA              | 7  |                                                      | QIGTQNDASTELNLSHILIALPENP<br>TSEQVNDAQR                   | 162 | 35 | 6  | 11.94 | b7b10y8°y8y11°y11                  | 3816.96 | 131.745 | 2686  | 3 | 1272.99 | 15.48  |
| Q7CR87 SURA_SALTY Chaperone surA              | 8  |                                                      | GQISAPVHSSFGWHLELDTR                                      | 362 | 22 | 5  | 18.77 | b3°b3y3y11y13                      | 2463.26 | 88.453  | 1740  | 3 | 821.76  | -9.12  |
| Q7CR87 SURA_SALTY Chaperone surA              | 9  |                                                      | LAITYSADQQALKGGQMGWGR                                     | 214 | 21 | 9  | 49.54 | b8°b8b15b16y3y4y5y12°y12           | 2251.14 | 66.115  | 14191 | 3 | 751.05  | 3.47   |
| Q7CR87 SURA_SALTY Chaperone surA              | 10 |                                                      | LAYDGLNYSTYRNQIR                                          | 117 | 16 | 9  | 45.27 | b6°b6b7°b7b8°b8b14y9y13            | 1946.96 | 66.023  | 6012  | 3 | 649.66  | -5.14  |
| Q7CR87 SURA_SALTY Chaperone surA              | 11 |                                                      | SRLAYDGLNYSTYR                                            | 115 | 14 | 5  | 30.18 | b3b7y3y4°y4                        | 1678.81 | 45.948  | 5018  | 2 | 839.91  | -3.20  |
| Q7CR87 SURA_SALTY Chaperone surA              | 12 |                                                      | EMIISEVRNNEVR                                             | 134 | 13 | 4  | 26.11 | b7b8b10°b10                        | 1588.80 | 41.775  | 3233  | 2 | 794.90  | -9.68  |
| Q7CR87 SURA_SALTY Chaperone surA              | 13 |                                                      | NGADFGKLAITYSADQQALK                                      | 207 | 20 | 5  | 13.01 | b9b13°b13y9°y9                     | 2111.05 | 105.146 | 2547  | 2 | 1056.03 | -13.99 |
| Q7CR87 SURA_SALTY Chaperone surA              | 14 | Oxidation+M(10)                                      | LIMDQIILQMGQK                                             | 73  | 13 | 7  | 42.27 | b5b6°b6y4y5°y5y12                  | 1546.81 | 89.872  | 16186 | 2 | 773.91  | -12.71 |
| Q7CR87 SURA_SALTY Chaperone surA              | 15 | Oxidation+M(19)                                      | VAAVVNNGVVLESVDGLMQSV<br>K                                | 27  | 23 | 7  | 18.12 | b8°b8y5°y5y8y12°y12                | 2359.23 | 114.158 | 2780  | 2 | 1180.12 | 4.97   |
| Q8ZQ40 WRBA_SALTY Flavoprotein wrbA           | 1  |                                                      | LGSVFSSTGTGGGQEQTITSTWTT<br>LAHHGMVIVPIGYAAQELFDVSQ<br>VR | 106 | 49 | 13 | 43.2  | b7b8b12y2y5y6°y6y9°y9y10°y10y22y49 | 5134.55 | 116.929 | 9791  | 4 | 1284.39 | -2.09  |
| Q8ZQ40 WRBA_SALTY Flavoprotein wrbA           | 2  |                                                      | TQNAPVATPQELADYDAIIFGTPT<br>R                             | 54  | 25 | 12 | 50.25 | b1b2°b2b4b7b11b13y6y11y12y13y25    | 2689.35 | 90.672  | 9259  | 3 | 897.12  | 1.63   |
| Q8ZQ40 WRBA_SALTY Flavoprotein wrbA           | 3  |                                                      | TFLDQTGGLWASGSLYGK                                        | 88  | 18 | 4  | 14.03 | b4°b4y3y7                          | 1900.94 | 73.916  | 6194  | 3 | 634.32  | -2.83  |

|                                                          |    |                       |                                        |     |    |    |       |                                                           |         |         |       |   |         |        |
|----------------------------------------------------------|----|-----------------------|----------------------------------------|-----|----|----|-------|-----------------------------------------------------------|---------|---------|-------|---|---------|--------|
| Q8ZQ40 WRBA_SALTY Flavoprotein wrbA                      | 4  |                       | GGTPYGATTIAGGDGSR                      | 155 | 17 | 6  | 37.52 | b4b5b11y4°y4y5                                            | 1537.76 | 77.373  | 10497 | 3 | 513.26  | 21.27  |
| Q8ZQ40 WRBA_SALTY Flavoprotein wrbA                      | 5  |                       | ILVLYYSMYGHETMAHAVAEGA<br>K            | 3   | 24 | 4  | 11.71 | b10y4°y4y12                                               | 2667.37 | 84.359  | 2476  | 3 | 889.79  | 13.55  |
| Q8ZQ40 WRBA_SALTY Flavoprotein wrbA                      | 6  |                       | TQNAPVATPQELADYDAIIFGTPT<br>RFGNMSGQMR | 54  | 34 | 15 | 36.13 | b3b6°b6°b6b8°b8°b8b10°b<br>10y3y5y8y10y12*y12             | 3697.83 | 122.869 | 61644 | 4 | 925.21  | 14.66  |
| Q8ZQ40 WRBA_SALTY Flavoprotein wrbA                      | 7  |                       | MAKILVLYYSMYGHETMAHAVA<br>EGAK         | 0   | 27 | 4  | 34.8  | y5y8y9y10                                                 | 2997.55 | 89.872  | 7529  | 3 | 999.85  | 14.42  |
| Q8ZQ40 WRBA_SALTY Flavoprotein wrbA                      | 8  |                       | AKILVLYYSMYGHETMAHAVA<br>EGAK          | 1   | 26 | 4  | 11.33 | b12y4y13°y13                                              | 2866.50 | 65.304  | 2612  | 6 | 478.59  | 12.09  |
| Q8ZQ40 WRBA_SALTY Flavoprotein wrbA                      | 9  | Oxidation+M(15)       | ILVLYYSMYGHETMAHAVAEGA<br>K            | 3   | 24 | 5  | 18.02 | y8y11°y11y15°y15                                          | 2683.36 | 100.212 | 4275  | 3 | 895.12  | 12.01  |
| P0A1V6 KPRS_SALTY Ribose-phohate<br>pyrophohokinase      | 1  |                       | ITAVIPYFGYAR                           | 84  | 12 | 4  | 41.9  | y5y7y8y10                                                 | 1370.74 | 81.552  | 26030 | 2 | 685.88  | -2.85  |
| P0A1V6 KPRS_SALTY Ribose-phohate<br>pyrophohokinase      | 2  |                       | LFAGNATPELAQR                          | 5   | 13 | 5  | 26.11 | y6y10°y10y11y13                                           | 1387.73 | 54.810  | 23683 | 2 | 694.37  | -2.81  |
| P0A1V6 KPRS_SALTY Ribose-phohate<br>pyrophohokinase      | 3  | Carbamidomethyl+C(11) | GGDIFIQSTCAPTNDNLMEVLVM<br>VDALR       | 49  | 29 | 5  | 11    | b11b13*b13y7y29                                           | 3192.60 | 121.706 | 1902  | 4 | 798.91  | 8.56   |
| P0A1V6 KPRS_SALTY Ribose-phohate<br>pyrophohokinase      | 4  |                       | AAEALK                                 | 231 | 6  | 2  | 25.1  | b4y3                                                      | 602.35  | 33.052  | 14694 | 1 | 602.35  | -5.98  |
| P0A1V6 KPRS_SALTY Ribose-phohate<br>pyrophohokinase      | 5  | Carbamidomethyl+C(10) | NSVIDEVVVCDTIPLTDEIK                   | 262 | 20 | 5  | 22.97 | b15y4y11y12°y12                                           | 2259.17 | 89.060  | 8997  | 2 | 1130.09 | 14.05  |
| P0A1V6 KPRS_SALTY Ribose-phohate<br>pyrophohokinase      | 6  |                       | LLNDTDMAIIDK                           | 182 | 12 | 4  | 34.24 | b4b6b10y9                                                 | 1361.67 | 65.453  | 6114  | 2 | 681.34  | -20.44 |
| P0A1V6 KPRS_SALTY Ribose-phohate<br>pyrophohokinase      | 7  |                       | FSDGEVSVQINENVR                        | 34  | 15 | 12 | 77.7  | b3b9b10°b10b13°b13y4y5<br>*y5y6y8y14                      | 1692.84 | 64.385  | 2324  | 2 | 846.92  | 13.99  |
| P0A1V6 KPRS_SALTY Ribose-phohate<br>pyrophohokinase      | 8  |                       | MPDMKLFAGNATPELAQR                     | 0   | 18 | 3  | 14.03 | b9b14y13                                                  | 1989.96 | 77.403  | 29417 | 2 | 995.49  | -12.70 |
| P0A1V6 KPRS_SALTY Ribose-phohate<br>pyrophohokinase      | 9  |                       | LLNDTDMAIIDKR                          | 182 | 13 | 3  | 27.87 | b5b9b11                                                   | 1517.80 | 71.867  | 26476 | 3 | 506.61  | 3.38   |
| P0A1V6 KPRS_SALTY Ribose-phohate<br>pyrophohokinase      | 10 | Carbamidomethyl+C(11) | GGDIFIQSTCAPTNDNLME                    | 49  | 20 | 2  | 12.49 | y4y16                                                     | 2196.02 | 121.703 | 8897  | 3 | 732.68  | 9.89   |
| P67605 YEEX_SALTY UPF0265 protein<br>yeeX                | 1  |                       | METTKPSFQDVLEFVR                       | 0   | 16 | 6  | 25.69 | b8y2y8y10y11y16                                           | 1926.95 | 85.986  | 67659 | 3 | 642.99  | -7.48  |
| P67605 YEEX_SALTY UPF0265 protein<br>yeeX                | 2  |                       | EIQDIEKK                               | 26  | 8  | 7  | 60    | b4b6b7°b7y5y6y8                                           | 1002.53 | 26.463  | 16807 | 2 | 501.77  | -13.82 |
| P67605 YEEX_SALTY UPF0265 protein<br>yeeX                | 3  |                       | ETTKPSFQDVLEFVR                        | 1   | 15 | 7  | 26.7  | b4b6°b6b7°b7y2y14                                         | 1795.90 | 72.536  | 14715 | 2 | 898.46  | -10.67 |
| P67605 YEEX_SALTY UPF0265 protein<br>yeeX                | 4  |                       | NAEISK                                 | 82  | 6  | 4  | 37.41 | b3°b3b4y3                                                 | 661.35  | 29.286  | 40246 | 1 | 661.35  | -8.12  |
| P67605 YEEX_SALTY UPF0265 protein<br>yeeX                | 5  |                       | VLLLDNLSDYIKPGMSVEAIQGIIA<br>SMK       | 41  | 28 | 3  | 17.09 | b3b10b15                                                  | 3018.63 | 119.640 | 9817  | 3 | 1006.88 | 2.43   |
| P67605 YEEX_SALTY UPF0265 protein<br>yeeX                | 6  |                       | VLLLDNLSDYIKPGMSVEAIQGIIA<br>SMKSDYEDR | 41  | 34 | 4  | 23.37 | b6b7y7y11                                                 | 3783.93 | 107.263 | 4071  | 5 | 757.59  | 3.55   |
| Q8ZL96 SYGB_SALTY Glycyl-tRNA<br>synthetase beta subunit | 1  |                       | SLAESFAANFTAELDNAGLAHGN<br>VEWFAPR     | 21  | 31 | 18 | 77.83 | b3b5b7b8°b8b9°b9b11b12<br>°b12b13°b13b14°b14y1y2y<br>8y10 | 3276.55 | 114.086 | 21111 | 3 | 1092.85 | -6.78  |
| Q8ZL96 SYGB_SALTY Glycyl-tRNA<br>synthetase beta subunit | 2  |                       | VANLAESQPDREVEK                        | 57  | 15 | 5  | 24.39 | b2y4°y4y6y7                                               | 1684.85 | 60.723  | 10664 | 3 | 562.29  | 0.87   |
| Q8ZL96 SYGB_SALTY Glycyl-tRNA<br>synthetase beta subunit | 3  |                       | LADAEFFNTDRK                           | 326 | 13 | 4  | 29.38 | b6b7b11y11                                                | 1573.74 | 71.848  | 1674  | 2 | 787.38  | -13.26 |
| Q8ZL96 SYGB_SALTY Glycyl-tRNA<br>synthetase beta subunit | 4  |                       | FLAVPAEALVYTMK                         | 268 | 14 | 6  | 52.98 | y6y9°y9y10y11y12                                          | 1552.86 | 101.973 | 31062 | 2 | 776.93  | 9.91   |
| Q8ZL96 SYGB_SALTY Glycyl-tRNA<br>synthetase beta subunit | 5  |                       | DPTQIISGNEK                            | 310 | 11 | 7  | 48.48 | b6b8y3°y3*y3y4y5                                          | 1201.60 | 35.740  | 22744 | 2 | 601.31  | -1.83  |
| Q8ZL96 SYGB_SALTY Glycyl-tRNA<br>synthetase beta subunit | 6  |                       | TLEEASALAAANK                          | 571 | 13 | 4  | 18.63 | b7b12°b12y7                                               | 1288.70 | 60.108  | 7532  | 2 | 644.85  | 17.05  |

|                                                        |    |                       |                                       |     |    |    |        |                                                                           |         |         |        |   |         |        |
|--------------------------------------------------------|----|-----------------------|---------------------------------------|-----|----|----|--------|---------------------------------------------------------------------------|---------|---------|--------|---|---------|--------|
| [Q8ZL96]SYGB_SALTY Glycyl-tRNA synthetase beta subunit | 7  |                       | RPTRPADFDAR                           | 552 | 11 | 6  | 48.48  | b7b10y4y7y10°y10                                                          | 1301.64 | 65.332  | 6205   | 2 | 651.33  | -20.54 |
| [Q8ZL96]SYGB_SALTY Glycyl-tRNA synthetase beta subunit | 8  |                       | GEWLLYR                               | 112 | 7  | 4  | 47.2   | b4b5b6y5                                                                  | 936.49  | 66.048  | 2797   | 2 | 468.75  | -4.69  |
| [Q8ZL96]SYGB_SALTY Glycyl-tRNA synthetase beta subunit | 9  |                       | GESTEALVPNMVATSLAK                    | 123 | 18 | 5  | 33.61  | b4b8b10b15y10                                                             | 1817.93 | 81.237  | 2568   | 2 | 909.47  | 1.68   |
| [Q8ZL96]SYGB_SALTY Glycyl-tRNA synthetase beta subunit | 10 | Carbamidomethyl+C(13) | FAGDDLPSNPVACALAIADK                  | 437 | 20 | 3  | 13.01  | b10y11y13                                                                 | 2044.97 | 102.563 | 1632   | 2 | 1022.99 | -13.79 |
| [Q8ZL96]SYGB_SALTY Glycyl-tRNA synthetase beta subunit | 11 |                       | APVDEFFENVMVNAEEK                     | 645 | 17 | 7  | 40.7   | b4b7b8°b8y5y6y8                                                           | 1967.93 | 73.990  | 1613   | 2 | 984.47  | 12.22  |
| [Q8ZL96]SYGB_SALTY Glycyl-tRNA synthetase beta subunit | 12 | Carbamidomethyl+C(2)  | GCGITVDQAER                           | 96  | 11 | 5  | 48.93  | b6y4y6y7y8                                                                | 1205.58 | 103.831 | 1543   | 1 | 1205.58 | 17.01  |
| [Q8ZL96]SYGB_SALTY Glycyl-tRNA synthetase beta subunit | 13 |                       | LQPYFADGR                             | 624 | 9  | 5  | 42.17  | b4b7°b7b8y6                                                               | 1066.51 | 114.123 | 1511   | 1 | 1066.51 | -16.48 |
| [Q8ZL96]SYGB_SALTY Glycyl-tRNA synthetase beta subunit | 14 |                       | SLAESFAANFTAELDNAGLAHGN<br>VEWF AAPRR | 21  | 32 | 5  | 16.7   | b5b10°b10°b10b12                                                          | 3432.72 | 105.334 | 7063   | 3 | 1144.91 | 13.44  |
| [Q8ZL96]SYGB_SALTY Glycyl-tRNA synthetase beta subunit | 15 |                       | FEEKFLAVPAEALVYTMK                    | 264 | 18 | 6  | 31.27  | b6b10b11b13y4°y4                                                          | 2086.07 | 76.312  | 5371   | 2 | 1043.54 | -9.25  |
| [Q8ZL96]SYGB_SALTY Glycyl-tRNA synthetase beta subunit | 16 |                       | GPAIAQAFDAEGKPSKAAEGWAR               | 73  | 23 | 6  | 20.99  | b9°b9°b9b10°b10y13                                                        | 2328.16 | 136.371 | 3156   | 2 | 1164.59 | -4.09  |
| [Q8ZL96]SYGB_SALTY Glycyl-tRNA synthetase beta subunit | 17 | Phohoryl STY(5)       | VIPATILGIQSDR                         | 171 | 13 | 3  | 23.4   | b3y9y10                                                                   | 1462.76 | 60.184  | 7262   | 2 | 731.88  | -1.34  |
| [Q8ZL96]SYGB_SALTY Glycyl-tRNA synthetase beta subunit | 18 | Phohoryl STY(8)       | NLALDLQTLTEEAVR                       | 494 | 15 | 10 | 71.14  | b3°b3b8b9°b9b10b11y7y8<br>y10                                             | 1765.89 | 114.108 | 5788   | 2 | 883.45  | 12.79  |
| [Q8ZL96]SYGB_SALTY Glycyl-tRNA synthetase beta subunit | 19 | Oxidation+M(14)       | LTNANVVDDVIDFMLGR                     | 514 | 17 | 9  | 39.45  | b3°b3b6°b6b14°b14y7y8y1<br>1                                              | 1907.95 | 65.332  | 3971   | 2 | 954.48  | -2.24  |
| [P0A1R6]DBHA_SALTY DNA-binding protein HU-alpha        | 1  |                       | AALESTLAAITESLKEGDAVQLVG<br>FGTFK     | 22  | 29 | 26 | 191.05 | b2b3b4b5°b5b7b9°b9b12b<br>13b19b23y2y3y4y5y6y7y8<br>y13y14y21y22y24y25y26 | 2966.57 | 115.442 | 418408 | 3 | 989.53  | -1.73  |
| [P0A1R6]DBHA_SALTY DNA-binding protein HU-alpha        | 2  |                       | AALESTLAAITESLK                       | 22  | 15 | 3  | 22.33  | b3b4y7                                                                    | 1517.85 | 97.819  | 25683  | 2 | 759.43  | 1.85   |
| [P0A1R6]DBHA_SALTY DNA-binding protein HU-alpha        | 3  |                       | ALKDAVK                               | 83  | 7  | 6  | 34.89  | b4y1y4°y4y5y7                                                             | 744.45  | 21.052  | 25059  | 2 | 372.73  | -13.20 |
| [P0A1R6]DBHA_SALTY DNA-binding protein HU-alpha        | 4  |                       | IAAANVPAFVSGK                         | 70  | 13 | 12 | 114    | b4b5°b5b6°b6b10y4y5y6y<br>8y10y12                                         | 1244.69 | 60.212  | 15765  | 1 | 1244.69 | -6.96  |
| [P0A1R6]DBHA_SALTY DNA-binding protein HU-alpha        | 5  |                       | EGDAVQLVGFGTFK                        | 37  | 14 | 9  | 36.07  | b6b8°b8b12°b12°b12y6°y6<br>y13                                            | 1467.77 | 63.671  | 5516   | 2 | 734.39  | 14.55  |
| [P0A1R6]DBHA_SALTY DNA-binding protein HU-alpha        | 6  |                       | VNHRAER                               | 51  | 7  | 4  | 37.9   | b5y3°y3y5                                                                 | 881.46  | 12.433  | 4291   | 2 | 441.24  | -6.02  |
| [P0A1R6]DBHA_SALTY DNA-binding protein HU-alpha        | 7  | Phohoryl STY(11)      | IAAANVPAFVSGK                         | 70  | 13 | 4  | 27.87  | b4b9°b9b11                                                                | 1324.65 | 136.391 | 2652   | 1 | 1324.65 | -1.38  |
| [P26982]DEGP_SALTY Protease do                         | 1  |                       | GAFVSQVMPNSSAAK                       | 313 | 15 | 9  | 57.38  | b3b5b12y2y8y9y10y12y15                                                    | 1493.75 | 54.232  | 15770  | 2 | 747.38  | 5.48   |
| [P26982]DEGP_SALTY Protease do                         | 2  |                       | VGDYTVAIGNPFLGETVTSGIVS<br>ALGR       | 186 | 28 | 11 | 48.71  | b3b6b7b8°b8y3y5°y5y6y14<br>y28                                            | 2750.41 | 117.094 | 13907  | 3 | 917.47  | -9.59  |
| [P26982]DEGP_SALTY Protease do                         | 3  |                       | LADSDALR                              | 178 | 8  | 4  | 33.63  | b3°b3b5y3                                                                 | 860.43  | 32.535  | 87089  | 2 | 430.72  | -15.61 |
| [P26982]DEGP_SALTY Protease do                         | 4  |                       | SGLNVENYENFIQTDAAINR                  | 214 | 20 | 4  | 22.43  | y5y11°y11y12                                                              | 2268.12 | 78.401  | 7382   | 2 | 1134.56 | 12.59  |
| [P26982]DEGP_SALTY Protease do                         | 5  |                       | NLTSQMVEYGQVK                         | 275 | 13 | 8  | 43.45  | b7b8b9°b9b11°b11y6°y6                                                     | 1496.74 | 63.692  | 4568   | 2 | 748.87  | -2.61  |
| [P26982]DEGP_SALTY Protease do                         | 6  |                       | NIAELR                                | 443 | 6  | 1  | 12.8   | y4                                                                        | 715.40  | 30.341  | 4357   | 2 | 358.20  | -13.05 |
| [P26982]DEGP_SALTY Protease do                         | 7  |                       | FMALGSGVIIDAAK                        | 110 | 14 | 4  | 25.15  | b5b12°b12b13                                                              | 1392.73 | 81.557  | 4094   | 2 | 696.87  | -17.79 |
| [P26982]DEGP_SALTY Protease do                         | 8  |                       | VMPSVVSINVEGSTTVNTPR                  | 48  | 20 | 8  | 51.61  | b9b10°b10b13b14y10y11°<br>y11                                             | 2087.11 | 65.357  | 2646   | 2 | 1044.06 | 13.45  |
| [P26982]DEGP_SALTY Protease do                         | 9  |                       | GELGIMGTELNSELAKE                     | 289 | 16 | 7  | 58.49  | y5y7y8y9y11°y11y12                                                        | 1661.81 | 63.696  | 2211   | 3 | 554.61  | -16.75 |
| [P26982]DEGP_SALTY Protease do                         | 10 |                       | AQVGTMPVGSKE                          | 352 | 11 | 8  | 46.72  | b3b6b7°b7y6°y6y7°y7                                                       | 1074.54 | 108.607 | 1970   | 1 | 1074.54 | -18.40 |
| [P26982]DEGP_SALTY Protease do                         | 11 |                       | RGELGIMGTELNSELAKE                    | 288 | 17 | 7  | 24.84  | b3b13°b13b14°b14°b14y1<br>3                                               | 1817.97 | 87.208  | 4021   | 2 | 909.49  | 14.91  |



|                                                   |    |                       |                                     |     |    |   |       |                                 |         |         |       |   |         |        |
|---------------------------------------------------|----|-----------------------|-------------------------------------|-----|----|---|-------|---------------------------------|---------|---------|-------|---|---------|--------|
| P26982 DEGP_SALTY Protease do                     | 12 | Phohoryl STY(17)      | VGDYTV AIGNPFG LGETVTS GIVS<br>ALGR | 186 | 28 | 5 | 25.3  | b9b11b15b16°b16                 | 2830.40 | 105.406 | 4783  | 2 | 1415.70 | 3.45   |
| P26982 DEGP_SALTY Protease do                     | 13 | Phohoryl STY(7)       | VMPSVV SINVEGSTTVNTPR               | 48  | 20 | 9 | 34.78 | b4°b4b5b10*b10y11*y11y<br>13y15 | 2167.05 | 96.417  | 1672  | 2 | 1084.03 | 6.87   |
| P26982 DEGP_SALTY Protease do                     | 14 | Oxidation+M(2)        | VMPSVV SINVEGSTTVNTPR               | 48  | 20 | 4 | 13.01 | b5b7°b7y15                      | 2103.06 | 65.361  | 10565 | 3 | 701.69  | -5.11  |
| P26982 DEGP_SALTY Protease do                     | 15 | Oxidation+M(6)        | AQVGTMPVGSK                         | 352 | 11 | 3 | 22.11 | b4b6y9                          | 1090.57 | 55.255  | 8827  | 2 | 545.79  | 12.20  |
| P26982 DEGP_SALTY Protease do                     | 16 | Oxidation+M(8)        | GAFVSQVMPNSSAAK                     | 313 | 15 | 5 | 33.44 | b5b10y8y9y11                    | 1509.74 | 42.776  | 1941  | 2 | 755.37  | 2.18   |
| P77983 KPYK1_SALTY Pyruvate kinase I              | 1  |                       | GDLGVEIPVEEVIFAQK                   | 244 | 17 | 6 | 41.12 | b3b4b7b8y1y14                   | 1843.00 | 95.532  | 39996 | 2 | 922.00  | 9.47   |
| P77983 KPYK1_SALTY Pyruvate kinase I              | 2  |                       | MLDAGMNVMR                          | 22  | 10 | 6 | 48.69 | b2y5y7y8y9y10                   | 1137.52 | 58.216  | 19449 | 2 | 569.26  | -2.68  |
| P77983 KPYK1_SALTY Pyruvate kinase I              | 3  | Carbamidomethyl+C(13) | YPLEAVSIMATICER                     | 319 | 15 | 7 | 16.31 | b1b4°b4b6°b6y2y4                | 1752.87 | 83.471  | 19153 | 2 | 876.94  | -0.49  |
| P77983 KPYK1_SALTY Pyruvate kinase I              | 4  |                       | IENQEGLNNFDEILEASDGIMVAR            | 220 | 24 | 8 | 21.52 | b2b12y1y2y3y4y8y24              | 2677.29 | 97.091  | 17147 | 3 | 893.10  | 4.01   |
| P77983 KPYK1_SALTY Pyruvate kinase I              | 5  | Carbamidomethyl+C(6)  | ITEAVCR                             | 353 | 7  | 5 | 50.21 | y3y4y5y6y7                      | 848.42  | 26.005  | 10742 | 2 | 424.71  | -9.78  |
| P77983 KPYK1_SALTY Pyruvate kinase I              | 6  |                       | AGQTFTFITDK                         | 86  | 11 | 6 | 32.19 | b6b8b11y2y5y8                   | 1216.59 | 51.852  | 7006  | 2 | 608.80  | 3.51   |
| P77983 KPYK1_SALTY Pyruvate kinase I              | 7  |                       | AEAGDVANAILDGTDAVMLSGES<br>AK       | 292 | 25 | 6 | 14.49 | b1b7b15y2y11y15                 | 2405.16 | 93.124  | 6590  | 2 | 1203.09 | 5.38   |
| P77983 KPYK1_SALTY Pyruvate kinase I              | 8  |                       | IQNLR                               | 46  | 5  | 1 | 12.3  | y4                              | 643.38  | 41.533  | 6701  | 1 | 643.38  | -10.62 |
| P77983 KPYK1_SALTY Pyruvate kinase I              | 9  |                       | MMIEK                               | 261 | 5  | 1 | 12.3  | y3                              | 651.31  | 55.920  | 3466  | 1 | 651.31  | -12.37 |
| P77983 KPYK1_SALTY Pyruvate kinase I              | 10 |                       | DVALQSGLAQK                         | 434 | 11 | 3 | 29.1  | b3b6b7                          | 1129.60 | 31.605  | 2591  | 3 | 377.21  | -15.99 |
| P77983 KPYK1_SALTY Pyruvate kinase I              | 11 |                       | VMNSR                               | 337 | 5  | 1 | 12.3  | y4                              | 606.30  | 83.532  | 2266  | 1 | 606.30  | -2.92  |
| P77983 KPYK1_SALTY Pyruvate kinase I              | 12 |                       | GAVETA EKLEAPLIVVATQGGK             | 360 | 22 | 3 | 22.13 | b10b11b13                       | 2181.20 | 82.303  | 26438 | 3 | 727.74  | -3.81  |
| P77983 KPYK1_SALTY Pyruvate kinase I              | 13 |                       | LEGGNDVSLKAGQTFITDK                 | 76  | 21 | 5 | 35.23 | y6y10y11°y11y12                 | 2229.13 | 79.595  | 14498 | 3 | 743.71  | 9.97   |
| P77983 KPYK1_SALTY Pyruvate kinase I              | 14 | Carbamidomethyl+C(3)  | IVCTIGPKTESEEMLSK                   | 5   | 17 | 3 | 14.67 | b12y3y15                        | 1921.95 | 51.897  | 14297 | 3 | 641.32  | -5.72  |
| P77983 KPYK1_SALTY Pyruvate kinase I              | 15 |                       | VLNNGDLGENKGVNLPGVSIALP<br>ALAEK    | 145 | 28 | 5 | 11.08 | b5°b5b11°b11y5                  | 2802.55 | 136.372 | 11111 | 3 | 934.85  | 3.57   |
| P77983 KPYK1_SALTY Pyruvate kinase I              | 16 | Carbamidomethyl+C(6)  | MMIEKCIR                            | 261 | 8  | 3 | 46.18 | b3b5b7                          | 1080.53 | 63.654  | 2363  | 1 | 1080.53 | -9.94  |
| P77983 KPYK1_SALTY Pyruvate kinase I              | 17 |                       | TESEEMLSKMLDAGMNVMR                 | 13  | 19 | 5 | 23.5  | b4y5y6y12*y12                   | 2171.99 | 76.183  | 1649  | 3 | 724.67  | 6.63   |
| P77983 KPYK1_SALTY Pyruvate kinase I              | 18 |                       | AGQTFITFTD                          | 86  | 10 | 0 | 2.98  |                                 | 1088.48 | 51.915  | 3967  | 3 | 363.50  | -6.84  |
| P77983 KPYK1_SALTY Pyruvate kinase I              | 19 |                       | AGQTFITFTDK                         | 86  | 11 | 1 | 7.5   | b9                              | 1199.56 | 51.880  | 1789  | 2 | 600.29  | 8.96   |
| Q8ZPD6 YNCE_SALTY Uncharacterized<br>protein yncE | 1  |                       | TFDTPTYPNSLALSADGK                  | 308 | 18 | 7 | 33.61 | b3y2y3y5y11y14y18               | 1897.93 | 66.538  | 27155 | 2 | 949.47  | 6.05   |
| Q8ZPD6 YNCE_SALTY Uncharacterized<br>protein yncE | 2  |                       | QAGQVSVIDAK                         | 291 | 11 | 5 | 12.02 | b9°b9y2y4y11                    | 1115.60 | 38.658  | 17416 | 2 | 558.30  | -5.58  |
| Q8ZPD6 YNCE_SALTY Uncharacterized<br>protein yncE | 3  |                       | EQEATQPDDVIR                        | 338 | 12 | 5 | 30.39 | y2y6y8y10y12                    | 1400.66 | 40.488  | 16774 | 2 | 700.83  | -2.18  |
| Q8ZPD6 YNCE_SALTY Uncharacterized<br>protein yncE | 4  |                       | LLDDGKEHFFINLSLDTAGHR               | 223 | 21 | 7 | 48.07 | b8b10b11b12y10*y10y11           | 2398.25 | 76.859  | 5368  | 3 | 800.09  | 14.56  |
| Q8ZPD6 YNCE_SALTY Uncharacterized<br>protein yncE | 5  |                       | LYTTNADGEFTIDTASNK                  | 198 | 19 | 4 | 13.48 | b8y10y14y19                     | 2074.01 | 77.490  | 4479  | 2 | 1037.51 | 8.12   |
| Q8ZPD6 YNCE_SALTY Uncharacterized<br>protein yncE | 6  |                       | TTIENTGK                            | 177 | 8  | 5 | 33.63 | b6y5°y5y7°y7                    | 863.44  | 61.356  | 13504 | 1 | 863.44  | -8.13  |
| Q8ZPD6 YNCE_SALTY Uncharacterized<br>protein yncE | 7  |                       | ELVADAATNTIYISGVGK                  | 144 | 18 | 6 | 24.12 | b7b11°b11b12°b12y11             | 1821.94 | 82.849  | 10499 | 3 | 607.98  | -13.13 |

|                                                 |    |                  |                              |     |    |    |       |                                      |         |         |        |   |         |        |
|-------------------------------------------------|----|------------------|------------------------------|-----|----|----|-------|--------------------------------------|---------|---------|--------|---|---------|--------|
| Q8ZPD6 YNCE_SALTY Uncharacterized protein yncE  | 8  |                  | LLDDGK                       | 223 | 6  | 1  | 12.8  | b3                                   | 660.37  | 35.039  | 10191  | 1 | 660.37  | 14.42  |
| Q8ZPD6 YNCE_SALTY Uncharacterized protein yncE  | 9  |                  | EHFFINLSLDTAGHR              | 229 | 15 | 9  | 39.46 | b10b11°b11*b11y4y6°y6y8°y8           | 1756.90 | 65.378  | 6906   | 3 | 586.31  | 14.59  |
| Q8ZPD6 YNCE_SALTY Uncharacterized protein yncE  | 10 |                  | ESAIWVVDGETIK                | 162 | 13 | 4  | 18.63 | b8°b8b11y8                           | 1446.72 | 44.197  | 2116   | 2 | 723.86  | -20.50 |
| Q8ZPD6 YNCE_SALTY Uncharacterized protein yncE  | 11 |                  | IAAPASLAVLFNPNTRNEAYVTHR     | 268 | 23 | 4  | 26.8  | y3y16y20y22                          | 2511.32 | 83.360  | 48183  | 4 | 628.58  | -12.25 |
| Q8ZPD6 YNCE_SALTY Uncharacterized protein yncE  | 12 |                  | NEAYVTHRQAGQVSVIDAK          | 283 | 19 | 10 | 36.67 | b8°b8b10°b10°b10b16b18y3°y3y8        | 2086.08 | 65.346  | 20070  | 3 | 696.03  | 7.61   |
| Q8ZPD6 YNCE_SALTY Uncharacterized protein yncE  | 13 |                  | AQRLYTTNADGEFITIDTASNK       | 195 | 22 | 4  | 12.26 | b5b9°b9y13                           | 2429.21 | 94.474  | 7034   | 2 | 1215.11 | 6.73   |
| Q8ZPD6 YNCE_SALTY Uncharacterized protein yncE  | 14 |                  | LLDDGKEHFFINLSLDTAGHR        | 223 | 21 | 3  | 12.6  | b6b12y6                              | 2398.24 | 96.576  | 1673   | 3 | 800.09  | 12.22  |
| Q8ZPD6 YNCE_SALTY Uncharacterized protein yncE  | 15 | Phohoryl STY(14) | LLDDGKEHFFINLSLDTAGHR        | 223 | 21 | 5  | 19.51 | b10°b10y6y9y11_H3PO4y11              | 2478.17 | 107.175 | 1905   | 4 | 620.30  | -1.77  |
| Q8ZPD6 YNCE_SALTY Uncharacterized protein yncE  | 16 |                  | LLDDGKEHFFINLSLDTAGH         | 223 | 20 | 0  | 7.95  |                                      | 2242.10 | 76.815  | 16412  | 2 | 1121.55 | -6.21  |
| P66738 RRF_SALTY Ribosome-recycling factor      | 1  |                  | ASLLDGIVVEYYGTPTPLR          | 31  | 21 | 5  | 16.74 | b8b15y5y14y21                        | 2248.20 | 94.084  | 55278  | 2 | 1124.61 | 7.38   |
| P66738 RRF_SALTY Ribosome-recycling factor      | 2  |                  | SMGPAVEK                     | 72  | 8  | 8  | 38.4  | b8y2°y2y5y6y7°y7y8                   | 818.40  | 27.734  | 25148  | 2 | 409.70  | -7.91  |
| P66738 RRF_SALTY Ribosome-recycling factor      | 3  |                  | QLASVTVEDSR                  | 52  | 11 | 5  | 29.1  | y2y5y6y8y11                          | 1204.62 | 40.891  | 24587  | 2 | 602.82  | 5.67   |
| P66738 RRF_SALTY Ribosome-recycling factor      | 4  |                  | AIMASDLGLNPSSAGTDIR          | 80  | 19 | 10 | 36.14 | b1b4b10b13y2y5°y5y6y9y19             | 1888.96 | 68.375  | 10121  | 2 | 944.98  | 6.40   |
| P66738 RRF_SALTY Ribosome-recycling factor      | 5  |                  | ALLK                         | 140 | 4  | 1  | 11.81 | y3                                   | 444.32  | 38.479  | 20263  | 1 | 444.32  | -3.92  |
| P66738 RRF_SALTY Ribosome-recycling factor      | 6  |                  | INVFDR                       | 66  | 6  | 4  | 40.42 | b5°b5y3y5                            | 763.41  | 50.413  | 15376  | 2 | 382.21  | -6.16  |
| P66738 RRF_SALTY Ribosome-recycling factor      | 7  |                  | VPLPLTEER                    | 99  | 10 | 5  | 39.39 | y3°y3y5y7°y7                         | 1150.64 | 59.024  | 12988  | 2 | 575.82  | -7.96  |
| P66738 RRF_SALTY Ribosome-recycling factor      | 8  |                  | AIMASDLGLNPSSAGTDIRVPLPLTEER | 80  | 29 | 12 | 48.36 | b5°b5b7°b7b8°b8y7y12y19y21y22y25     | 3020.58 | 87.165  | 83724  | 3 | 1007.53 | 4.20   |
| P66738 RRF_SALTY Ribosome-recycling factor      | 9  |                  | IVRGAEQAR                    | 115 | 10 | 3  | 24.62 | b5b7y7                               | 1128.61 | 16.733  | 15021  | 2 | 564.81  | 0.00   |
| P0A2C1 RNH2_SALTY Ribonuclease HII              | 1  |                  | AEAHEIDELNILHATMLAMQR        | 72  | 21 | 13 | 32.09 | b4b6b12*b12y1y2*y2y6*y9*y9y10°y10y21 | 2406.17 | 107.230 | 11634  | 3 | 802.73  | -9.03  |
| P0A2C1 RNH2_SALTY Ribonuclease HII              | 2  |                  | MIEFVYPHTLVAGVDEVGR          | 0   | 20 | 5  | 25.61 | b3b8y8y9y20                          | 2269.13 | 70.122  | 10377  | 3 | 757.05  | -4.41  |
| P0A2C1 RNH2_SALTY Ribonuclease HII              | 3  |                  | GYPTAFHLEK                   | 163 | 10 | 3  | 24.62 | b3b8y9                               | 1162.58 | 41.876  | 22891  | 2 | 581.80  | -4.09  |
| P0A2C1 RNH2_SALTY Ribonuclease HII              | 4  |                  | LAQYGATAHHR                  | 173 | 11 | 7  | 55.22 | b3b8°b8b9y4y5y10                     | 1224.61 | 64.444  | 4132   | 3 | 408.88  | -10.17 |
| P0A2C1 RNH2_SALTY Ribonuclease HII              | 5  |                  | AVAGLHIAPEYVLIDGNR           | 93  | 18 | 8  | 37.29 | b17y4°y4y5°y5y6*y6y8                 | 1908.03 | 64.391  | 4000   | 3 | 636.68  | -3.52  |
| P0A2C1 RNH2_SALTY Ribonuclease HII              | 6  |                  | GYPTAFHLEKLAQYGATAHHR        | 163 | 21 | 4  | 22.52 | b5b6b10y6                            | 2368.23 | 79.310  | 11662  | 3 | 790.08  | 13.30  |
| P0A2C1 RNH2_SALTY Ribonuclease HII              | 7  |                  | EKALSWSLGR                   | 62  | 10 | 4  | 36.93 | b4b6b7y5                             | 1146.61 | 66.100  | 5245   | 2 | 573.81  | -14.80 |
| P0A2C1 RNH2_SALTY Ribonuclease HII              | 8  | Phohoryl STY(15) | AEAHEIDELNILHATMLAMQR        | 72  | 21 | 8  | 12.6  | b13°b13°b13y6°y6y11°y11°y11          | 2486.16 | 83.538  | 9119   | 3 | 829.39  | 4.62   |
| P0A2C1 RNH2_SALTY Ribonuclease HII              | 9  | Oxidation+M()    | AEAHEIDELNILHATMLAMQR        | 72  | 21 | 5  | 16.74 | b4b6y8y10°y10                        | 2422.15 | 86.973  | 147671 | 3 | 808.05  | -14.51 |
| Q8ZRX8 DAPB_SALTY Dihydrodipicolinate reductase | 1  |                  | AGDIVGEHTAMFADIGER           | 212 | 18 | 10 | 37.69 | b6°b6b7b14y6°y6y10°y10y13°y13        | 1888.88 | 105.223 | 25883  | 3 | 630.30  | -4.52  |
| Q8ZRX8 DAPB_SALTY Dihydrodipicolinate reductase | 2  |                  | VMGDYSDIEIEAHR               | 145 | 16 | 4  | 21.96 | b2b12b13y5                           | 1884.91 | 70.135  | 14148  | 3 | 628.98  | 10.82  |

|                                                            |    |                       |                                          |     |    |    |       |                              |         |         |       |   |         |        |
|------------------------------------------------------------|----|-----------------------|------------------------------------------|-----|----|----|-------|------------------------------|---------|---------|-------|---|---------|--------|
| Q8ZRX8 DAPB_SALTY Dihydrodipicolinate reductase            | 3  |                       | NGLFDMR                                  | 258 | 7  | 3  | 19.58 | b4y4°y4                      | 852.40  | 51.934  | 9138  | 2 | 426.70  | -6.73  |
| Q8ZRX8 DAPB_SALTY Dihydrodipicolinate reductase            | 4  | Carbamidomethyl+C(22) | DDFDVFDTRPEGTLTHLAFCR                    | 70  | 23 | 6  | 26.55 | b4y4y6y7y11°y11              | 2772.32 | 111.976 | 5625  | 3 | 924.78  | 4.58   |
| Q8ZRX8 DAPB_SALTY Dihydrodipicolinate reductase            | 5  |                       | VDAPSGTALAMGEAIAIGALDK                   | 163 | 21 | 4  | 25.19 | b14b15y10y12                 | 1957.99 | 82.161  | 7164  | 3 | 653.34  | 0.69   |
| Q8ZRX8 DAPB_SALTY Dihydrodipicolinate reductase            | 6  |                       | QLIQAAMAMEGVQLGAALER                     | 19  | 20 | 3  | 19.8  | b5b8b13                      | 2100.05 | 96.313  | 3150  | 3 | 700.69  | -19.88 |
| Q8ZRX8 DAPB_SALTY Dihydrodipicolinate reductase            | 7  |                       | VAGTIGFATVR                              | 201 | 11 | 3  | 22.11 | b4b8y6                       | 1091.61 | 57.341  | 2306  | 2 | 546.31  | -12.08 |
| Q8ZRX8 DAPB_SALTY Dihydrodipicolinate reductase            | 8  |                       | AAKVMGDYSIEIEAHHR                        | 142 | 19 | 3  | 13.48 | b7b13y12                     | 2155.09 | 105.388 | 72810 | 3 | 719.04  | 14.05  |
| Q8ZRX8 DAPB_SALTY Dihydrodipicolinate reductase            | 9  |                       | VAGTIGFATVRAGDIVGEHTAMFADIGER            | 201 | 29 | 3  | 16.95 | b5b9b19                      | 2961.46 | 66.199  | 31245 | 4 | 741.12  | -11.29 |
| Q8ZRX8 DAPB_SALTY Dihydrodipicolinate reductase            | 10 |                       | ASSRMTFANGALR                            | 236 | 13 | 4  | 23.4  | b11°b11b12y10                | 1381.70 | 58.261  | 5217  | 2 | 691.35  | -2.30  |
| Q8ZRX8 DAPB_SALTY Dihydrodipicolinate reductase            | 11 | Phohoryl STY(7)       | QAIREASQEIAIVFAANFSGVNV MLK              | 111 | 27 | 3  | 22.04 | b5b6b12                      | 2985.49 | 79.423  | 3276  | 3 | 995.83  | -10.47 |
| Q8ZRX8 DAPB_SALTY Dihydrodipicolinate reductase            | 12 | Oxidation+M()         | QLIQAAMAMEGVQLGAALEREGRS SLLGSDAGELAGAGK | 19  | 38 | 6  | 33.17 | b12b13y3y12y13°y13           | 3715.84 | 103.893 | 8230  | 4 | 929.72  | -6.44  |
| Q8ZRX8 DAPB_SALTY Dihydrodipicolinate reductase            | 13 | Oxidation+M(11)       | AGDIVGEHTAMFADIGER                       | 212 | 18 | 4  | 21.43 | b8°b8b9y3                    | 1904.91 | 120.627 | 2601  | 3 | 635.64  | 13.71  |
| P06202 OPPA_SALTY Periplasmic oligopeptide-binding protein | 1  |                       | LADPNTAYASYLQYGHIANIDIIA GKKPATDLGVK     | 125 | 38 | 9  | 36.59 | b3b6b7b8°b8y4y8y30y38        | 4001.03 | 83.971  | 65437 | 5 | 801.01  | -8.60  |
| P06202 OPPA_SALTY Periplasmic oligopeptide-binding protein | 2  |                       | AEQQLDKDSAIVPVYYYVNAR                    | 494 | 21 | 9  | 23.64 | b2b4b7°b7b12y1y6y9y21        | 2442.23 | 73.887  | 29991 | 3 | 814.75  | 1.00   |
| P06202 OPPA_SALTY Periplasmic oligopeptide-binding protein | 3  | Carbamidomethyl+C(4)  | AGWCADYNEPTSFLNTMLSDSSN NTAHYK           | 439 | 29 | 4  | 16.95 | y3y7y13y29                   | 3294.43 | 90.898  | 17972 | 3 | 1098.81 | 5.56   |
| P06202 OPPA_SALTY Periplasmic oligopeptide-binding protein | 4  |                       | NQGDLPAYSYTPPYTDGAK                      | 333 | 19 | 10 | 33.93 | b7°b7b11b13°b13y2y9y11y14y19 | 2057.97 | 59.984  | 16805 | 2 | 1029.49 | 10.56  |
| P06202 OPPA_SALTY Periplasmic oligopeptide-binding protein | 5  |                       | TVINQVTYLPISSEVTDVNR                     | 241 | 20 | 9  | 49.1  | b1b4°b4y5y6y7y11y12y20       | 2248.20 | 77.916  | 11715 | 2 | 1124.60 | 5.86   |
| P06202 OPPA_SALTY Periplasmic oligopeptide-binding protein | 6  |                       | LVEPEWFK                                 | 352 | 8  | 3  | 30.62 | b5y5y6                       | 1047.54 | 72.046  | 24270 | 2 | 524.28  | -6.29  |
| P06202 OPPA_SALTY Periplasmic oligopeptide-binding protein | 7  |                       | WSDGTPVTAHDFVYSWQR                       | 107 | 18 | 3  | 22.95 | y5y9y10                      | 2152.02 | 73.411  | 24019 | 3 | 718.01  | 15.09  |
| P06202 OPPA_SALTY Periplasmic oligopeptide-binding protein | 8  |                       | NLGVNVNLENQEWK                           | 410 | 14 | 5  | 25.94 | b4b7b12°b12°b12              | 1656.84 | 67.693  | 8178  | 2 | 828.92  | 4.79   |
| P06202 OPPA_SALTY Periplasmic oligopeptide-binding protein | 9  | Carbamidomethyl+C(6)  | VDPYLCTYYEINNQK                          | 291 | 16 | 3  | 21.96 | b7b8y9                       | 2082.99 | 117.738 | 6320  | 3 | 695.00  | 22.39  |
| P06202 OPPA_SALTY Periplasmic oligopeptide-binding protein | 10 |                       | LLAEAGFTADKPLTFDLLYNTSDL HK              | 372 | 26 | 5  | 16.56 | b8°b8b10b12y4                | 2893.44 | 116.761 | 3841  | 3 | 965.15  | -21.26 |
| P06202 OPPA_SALTY Periplasmic oligopeptide-binding protein | 11 |                       | ALDDHTFEVTLSEPVPHYFK                     | 163 | 20 | 3  | 13.01 | b11y6y10                     | 2371.13 | 91.201  | 3090  | 3 | 791.05  | -6.69  |
| P06202 OPPA_SALTY Periplasmic oligopeptide-binding protein | 12 |                       | LVKPWVGGYTGK                             | 515 | 12 | 4  | 27.38 | y3y6y7°y7                    | 1304.71 | 72.539  | 2968  | 1 | 1304.71 | -21.52 |

|                                                             |    |  |                                     |     |    |    |       |                                                |         |         |       |   |        |        |
|-------------------------------------------------------------|----|--|-------------------------------------|-----|----|----|-------|------------------------------------------------|---------|---------|-------|---|--------|--------|
| [P06202]OPPA_SALTY Periplasmic oligopeptide-binding protein | 13 |  | DSAIVPVYYYVNAR                      | 501 | 14 | 4  | 17.37 | b3°b3y7y12                                     | 1629.84 | 63.682  | 2935  | 2 | 815.42 | 6.82   |
| [P06202]OPPA_SALTY Periplasmic oligopeptide-binding protein | 14 |  | VADDTQR                             | 481 | 7  | 4  | 37.9  | b5y4*y4y6                                      | 804.39  | 98.630  | 2616  | 1 | 804.39 | 10.40  |
| [P06202]OPPA_SALTY Periplasmic oligopeptide-binding protein | 15 |  | SLIAAGILTALIAASAATAADVPAG<br>VQLADK | 7   | 31 | 7  | 34.92 | b13b29y15y19y20y21°y21                         | 2863.63 | 136.880 | 2509  | 3 | 955.22 | 7.08   |
| [P06202]OPPA_SALTY Periplasmic oligopeptide-binding protein | 16 |  | DLFEGLLISDVEGHPGVAEK                | 67  | 22 | 5  | 27.27 | b3y7y8y12y14                                   | 2309.17 | 89.948  | 1801  | 3 | 770.39 | 0.74   |
| [P06202]OPPA_SALTY Periplasmic oligopeptide-binding protein | 17 |  | APFNDVRVR                           | 307 | 9  | 5  | 35.89 | b3b4*b4b8°b8                                   | 1073.60 | 26.872  | 52743 | 2 | 537.30 | 11.37  |
| [P06202]OPPA_SALTY Periplasmic oligopeptide-binding protein | 18 |  | NQGDLPAYSYTPPYTDGAKLVEP<br>EWFK     | 333 | 27 | 4  | 34.83 | b5°b5b6b7                                      | 3086.44 | 72.533  | 11442 | 4 | 772.37 | -12.66 |
| [P06202]OPPA_SALTY Periplasmic oligopeptide-binding protein | 19 |  | SELYAKAEQQLDK                       | 488 | 13 | 5  | 18.63 | b10°b10y5y7*y7                                 | 1522.77 | 58.965  | 7655  | 2 | 761.89 | -2.08  |
| [P06202]OPPA_SALTY Periplasmic oligopeptide-binding protein | 20 |  | FGDKWTQPANIVTNGAYK                  | 200 | 18 | 16 | 89.51 | b4°b4b5b6b8b9b13y3y6°y6<br>y7*y7y10°y10*y10y12 | 2009.99 | 64.413  | 6104  | 3 | 670.67 | -9.96  |
| [P06202]OPPA_SALTY Periplasmic oligopeptide-binding protein | 21 |  | TFLDTRHQGTDFVAR                     | 424 | 15 | 6  | 26.7  | b5b6b11°b11*b11y11                             | 1763.88 | 69.513  | 3369  | 2 | 882.45 | 0.42   |
| [P06202]OPPA_SALTY Periplasmic oligopeptide-binding protein | 22 |  | DPLDNIYVKNLYIIK                     | 527 | 15 | 4  | 24.39 | b3b9b10°b10                                    | 1821.03 | 101.305 | 3215  | 2 | 911.02 | 6.44   |
| [P06202]OPPA_SALTY Periplasmic oligopeptide-binding protein | 23 |  | AEQQLDKDSAIVPVYYYVNAR               | 494 | 21 | 7  | 40.67 | b5b6b11b15y6*y6y7                              | 2442.26 | 97.361  | 3161  | 4 | 611.32 | 12.70  |
| [P06202]OPPA_SALTY Periplasmic oligopeptide-binding protein | 24 |  | ASYLQYGHIANIDDIAGKKPATDL<br>GVK     | 135 | 28 | 0  | 16.39 |                                                | 2971.61 | 84.030  | 2317  | 4 | 743.66 | 8.46   |
| [P41031]CY_SALTY Thiosulfate-binding protein                | 1  |  | VNNPEIMGK                           | 286 | 9  | 7  | 49.95 | b1b2b6y4y6y8y9                                 | 1001.50 | 37.198  | 46700 | 2 | 501.25 | -8.59  |
| [P41031]CY_SALTY Thiosulfate-binding protein                | 2  |  | TEQFMTQFLK                          | 179 | 10 | 4  | 26.38 | b3b4y9y10                                      | 1272.63 | 76.351  | 41496 | 2 | 636.82 | 3.84   |
| [P41031]CY_SALTY Thiosulfate-binding protein                | 3  |  | LPNNSFYSTMGFLVR                     | 110 | 17 | 7  | 30.53 | b6b7b10°b10y5y13y17                            | 1929.97 | 92.754  | 41357 | 2 | 965.49 | 7.46   |
| [P41031]CY_SALTY Thiosulfate-binding protein                | 4  |  | NVEVFDTGGR                          | 189 | 10 | 5  | 36.93 | b5y4y7y8y10                                    | 1093.52 | 48.203  | 36207 | 2 | 547.27 | -3.91  |
| [P41031]CY_SALTY Thiosulfate-binding protein                | 5  |  | QALAILQLK                           | 71  | 10 | 5  | 36.93 | b1b3y5y6y8                                     | 1054.66 | 75.839  | 33071 | 2 | 527.83 | -3.01  |
| [P41031]CY_SALTY Thiosulfate-binding protein                | 6  |  | LIFPNPK                             | 146 | 7  | 7  | 37.9  | y1y2y3y4y5*y5y7                                | 828.49  | 56.767  | 33060 | 2 | 414.75 | -11.35 |
| [P41031]CY_SALTY Thiosulfate-binding protein                | 7  |  | FGSWPEVMK                           | 311 | 9  | 7  | 35.89 | b2y2y4y5°y5y7y9                                | 1080.51 | 69.624  | 27832 | 2 | 540.76 | -5.99  |
| [P41031]CY_SALTY Thiosulfate-binding protein                | 8  |  | NIHDWSDLVR                          | 132 | 10 | 13 | 70.28 | b1b2b3*b3b4°b4*b4y2y4y<br>6y7y9y10             | 1254.62 | 64.474  | 22088 | 2 | 627.81 | -4.28  |
| [P41031]CY_SALTY Thiosulfate-binding protein                | 9  |  | GLGDVLISFESEVNNIRK                  | 208 | 18 | 3  | 21.43 | b13b14y11                                      | 1990.09 | 75.033  | 5215  | 2 | 995.55 | 14.35  |
| [P41031]CY_SALTY Thiosulfate-binding protein                | 10 |  | ELFAALNPPFEQQWAK                    | 37  | 16 | 6  | 31.21 | b6b12y9y11y13°y13                              | 1888.97 | 90.676  | 46904 | 2 | 944.99 | 7.69   |
| [P41031]CY_SALTY Thiosulfate-binding protein                | 11 |  | GLGDVLISFESEVNNIR                   | 208 | 17 | 5  | 32.67 | b11y6y8y10y11                                  | 1861.94 | 60.828  | 3550  | 3 | 621.32 | -11.74 |

|                                              |    |                 |                          |     |    |    |       |                                   |         |         |       |   |         |        |
|----------------------------------------------|----|-----------------|--------------------------|-----|----|----|-------|-----------------------------------|---------|---------|-------|---|---------|--------|
| [P41031 CY_SALTY Thiosulfate-binding protein | 12 |                 | FPQTELFRR                | 299 | 8  | 9  | 63.01 | b4*b4b5b7°b7*b7y4°y4y6            | 1037.56 | 66.081  | 2441  | 2 | 519.29  | 21.41  |
| [P41031 CY_SALTY Thiosulfate-binding protein | 13 |                 | QYEAQGFEVVIPK            | 226 | 13 | 4  | 26.11 | b7b8b11*b11                       | 1507.75 | 64.443  | 2288  | 2 | 754.38  | -20.40 |
| [P41031 CY_SALTY Thiosulfate-binding protein | 14 |                 | THFASGGELDK              | 320 | 11 | 4  | 32.19 | b4b6y4y10                         | 1161.55 | 91.828  | 2109  | 1 | 1161.55 | -1.37  |
| [P41031 CY_SALTY Thiosulfate-binding protein | 15 |                 | NVQANGTEK                | 253 | 9  | 9  | 71.04 | b4b5b6b7°b7*b7y4y6*y6             | 960.47  | 113.378 | 1713  | 1 | 960.47  | -7.50  |
| [P41031 CY_SALTY Thiosulfate-binding protein | 16 |                 | TNLAEPVAVWDKNVQANGTEK    | 239 | 23 | 12 | 47.95 | b3°b3b8y6°y6y9*y9y10y13*y13y18y20 | 2544.32 | 91.448  | 79203 | 3 | 848.78  | 3.26   |
| [P41031 CY_SALTY Thiosulfate-binding protein | 17 |                 | GNPKNIHDWSDLVR           | 128 | 14 | 5  | 44.68 | b3b5b7b9y12                       | 1650.83 | 84.241  | 23044 | 3 | 550.95  | -2.00  |
| [P41031 CY_SALTY Thiosulfate-binding protein | 18 |                 | TSGNARYTYLAAWGAADNADGGDK | 153 | 24 | 9  | 44.99 | b5b8b9*b9b12b14°b14b15y6          | 2445.14 | 94.425  | 8383  | 4 | 612.04  | 13.98  |
| [P41031 CY_SALTY Thiosulfate-binding protein | 19 |                 | LIFPNPKTSGNAR            | 146 | 13 | 5  | 29.38 | b3y3y4y6°y6                       | 1414.80 | 72.560  | 6493  | 2 | 707.90  | 13.55  |
| [P41031 CY_SALTY Thiosulfate-binding protein | 20 |                 | TEQFMTQFLKNVEVFDTGGR     | 179 | 20 | 4  | 21.14 | b11*b11y4y5                       | 2347.14 | 58.756  | 5343  | 3 | 783.05  | 1.14   |
| [P41031 CY_SALTY Thiosulfate-binding protein | 21 |                 | QADKFPQTELFRR            | 295 | 12 | 3  | 20.17 | b5b8y7                            | 1479.75 | 60.028  | 5093  | 2 | 740.38  | -6.02  |
| [P41031 CY_SALTY Thiosulfate-binding protein | 22 |                 | ELFAALNPPFEQQWAKDNGGDK   | 37  | 22 | 9  | 29.1  | b5b7b12*b12y7y9*y9y14*y14         | 2475.22 | 87.143  | 3346  | 3 | 825.75  | 10.95  |
| [P41031 CY_SALTY Thiosulfate-binding protein | 23 |                 | NVEVFDTGGRGATTTFAER      | 189 | 19 | 11 | 48.59 | b4*b4b9y3y5°y5y6°y6y7y13°y13      | 2027.99 | 64.464  | 2683  | 3 | 676.67  | 7.89   |
| [P41031 CY_SALTY Thiosulfate-binding protein | 24 |                 | VEEKFGSWPEVMK            | 307 | 13 | 3  | 18.63 | b4b11y11                          | 1565.76 | 74.811  | 1730  | 2 | 783.38  | -4.37  |
| [P41031 CY_SALTY Thiosulfate-binding protein | 25 |                 | VNNPEIMGKQADK            | 286 | 13 | 12 | 73.29 | b3*b3b4b5b7°b7*b7b10°b10b11°b11y8 | 1443.71 | 63.682  | 1653  | 2 | 722.36  | -11.33 |
| [P41031 CY_SALTY Thiosulfate-binding protein | 26 | Phohoryl STY(8) | AYLNWLYQAQTIITHYYR       | 265 | 21 | 5  | 35.1  | b6b7y5y6y10                       | 2744.29 | 106.195 | 2866  | 3 | 915.44  | 4.45   |
