# Supplementary material for: Phenotypic profile linked to inhibition of the major Zn influx system in Salmonella enterica : proteomics and ionomics investigations
Source: Royal Society of Chemistry journal article supplement (doi:10.1039/c0mb00140f), 2010-10-20
Supplement: c0mb00140f.zip [file c0mb00140f.zip]

LC-MS run 2: 6926\_220709\_1a2\_02

| Protein name                                   | Peptide Rank | Peptide Modification | Peptide Sequence              | Peptide sequence start | Peptide sequence Length | Peptide Matched Products | Score  | By Matches                                                                                                                                           | Precursor MH+ (Da) | Retention time (min) | Intensity | z | Precursor m/z | MH+ Error (ppm) |
|------------------------------------------------|--------------|----------------------|-------------------------------|------------------------|-------------------------|--------------------------|--------|------------------------------------------------------------------------------------------------------------------------------------------------------|--------------------|----------------------|-----------|---|---------------|-----------------|
| P0A1R6 DBHA_SALTY DNA-binding protein HU-alpha | 1            |                      | IAAANVPAFVSGK                 | 70                     | 13                      | 26                       | 228.16 | b2b3b4b5*b5b6*b6b7b9b12y2y3y4y5y6y7*y7y8y9*y9*y9y10*y10y11y12y13                                                                                     | 1244.70            | 60.158               | 623228    | 2 | 622.85        | -2.35           |
| P0A1R6 DBHA_SALTY DNA-binding protein HU-alpha | 2            |                      | AALESTLAAITESLKEGDAVQLVGFGTFK | 22                     | 29                      | 53                       | 425.17 | b2b3b4b5*b5b6*b6b7*b7b8*b8b9*b9b11b12b14b17b20b23b24b25b26b29y1y2y3y4y5*y5y6*y6y7y8y10y13*y13*y13y14y15*y15*y15y18y19y20*y20y21y22y23y24y25y26y27y29 | 2966.56            | 115.107              | 587334    | 3 | 989.53        | -3.05           |
| P0A1R6 DBHA_SALTY DNA-binding protein HU-alpha | 3            |                      | AALESTLAAITESLK               | 22                     | 15                      | 11                       | 89.89  | b3b4b6b8b13y1y2y3y5y8y12                                                                                                                             | 1517.85            | 97.542               | 48286     | 2 | 759.43        | 2.90            |
| P0A1R6 DBHA_SALTY DNA-binding protein HU-alpha | 4            |                      | TQLIDVIADK                    | 3                      | 10                      | 5                        | 47.95  | b2b5y3y6y8                                                                                                                                           | 1115.63            | 66.642               | 21057     | 2 | 558.32        | -2.52           |
| P0A1R6 DBHA_SALTY DNA-binding protein HU-alpha | 5            |                      | ALKDAVK                       | 83                     | 7                       | 3                        | 37.49  | b3b4y4                                                                                                                                               | 744.45             | 45.424               | 28898     | 2 | 372.73        | -14.84          |
| P0A1H5 EFTU_SALTY Elongation factor Tu         | 1            |                      | AIDKPFLLPIDVFSISGR            | 205                    | 19                      | 33                       | 275.94 | b2b3b4*b4b6*b6b7b8b9b10b12b13y1y2y3y4y5*y5y6*y6y7*y7y8y9*y9y10y11*y11y12y13y15y16y19                                                                 | 2117.14            | 104.745              | 777486    | 3 | 706.39        | -9.46           |
| P0A1H5 EFTU_SALTY Elongation factor Tu         | 2            |                      | GITINTSHVEYDTPTR              | 59                     | 16                      | 27                       | 195.92 | b2b3*b3b9b10b12b13b16y2y3y4y5y6y7*y7y8y9*y9y10*y10y11y12*y12*y12y14*y14y16                                                                           | 1803.86            | 50.071               | 412246    | 3 | 601.96        | -14.08          |
| P0A1H5 EFTU_SALTY Elongation factor Tu         | 3            |                      | ELLSQYDFPGDDTPIVR             | 155                    | 17                      | 17                       | 156.43 | b2b9b13y1y3y4y5y6y8y9*y9y10y11y12y13y14y17                                                                                                           | 1964.97            | 77.559               | 401974    | 2 | 982.99        | 4.78            |
| P0A1H5 EFTU_SALTY Elongation factor Tu         | 4            |                      | TTLTAAITTVLAK                 | 25                     | 13                      | 24                       | 182.44 | b2*b2b3*b3b4*b4b5*b5b6*b6b7*b7b13y2y3y4y5y6y7y8y9y10y11y13                                                                                           | 1303.78            | 85.126               | 370610    | 2 | 652.39        | -6.09           |
| P0A1H5 EFTU_SALTY Elongation factor Tu         | 5            |                      | IIELAGFLDSYIPEPER             | 188                    | 17                      | 31                       | 282.12 | b2b3b4b5b6b7b8b11*b11b12*b12b14y1y2*y2y3*y3y4y5*y5y6y7y8y9y10y11y12y13y14y15y17                                                                      | 1962.04            | 102.514              | 357836    | 2 | 981.52        | 7.96            |
| P0A1H5 EFTU_SALTY Elongation factor Tu         | 6            |                      | QVGVPYIIVFLNK                 | 124                    | 13                      | 16                       | 83.51  | b2*b2b3*b3b4*b4b6*b6b13y1y4y5y6y9y11y13                                                                                                              | 1489.87            | 99.594               | 346394    | 2 | 745.44        | -1.97           |
| P0A1H5 EFTU_SALTY Elongation factor Tu         | 7            |                      | ALEGDAEWEAK                   | 177                    | 11                      | 6                        | 47.56  | b2y5y7y8y9*y9                                                                                                                                        | 1218.56            | 46.966               | 233877    | 2 | 609.78        | -2.00           |
| P0A1H5 EFTU_SALTY Elongation factor Tu         | 8            |                      | TTDVTGTIELPEGVEMVMPGDNIK      | 334                    | 24                      | 38                       | 223.09 | b1b2*b2b3*b3b4b5b8*b8b9*b9b10*b10b16*b16b17b18y1y2y3y5y6*y6*y6y7*y7*y7y8y9y10*y10y13*y13y14*y14y15y16y24                                             | 2546.26            | 87.460               | 222597    | 2 | 1273.63       | 9.59            |
| P0A1H5 EFTU_SALTY Elongation factor Tu         | 9            |                      | VGEEVEIVGIK                   | 238                    | 11                      | 9                        | 81.81  | b2y3y4y5y7y8y10*y10y11                                                                                                                               | 1171.65            | 60.838               | 180865    | 2 | 586.33        | -3.02           |

|                                        |    |                                      |                                |     |    |    |        |                                                          |         |         |        |   |         |        |
|----------------------------------------|----|--------------------------------------|--------------------------------|-----|----|----|--------|----------------------------------------------------------|---------|---------|--------|---|---------|--------|
| P0A1H5 EFTU_SALTY Elongation factor Tu | 10 | Carbamidomethyl+C(3)                 | STCTGVEMFR                     | 253 | 10 | 7  | 51.93  | b2y2y4y6y7y8y10                                          | 1187.52 | 53.380  | 135172 | 2 | 594.26  | -2.36  |
| P0A1H5 EFTU_SALTY Elongation factor Tu | 11 | Carbamidomethyl+C(1)                 | CDMVDDEELLELVEMEV              | 137 | 18 | 23 | 176.61 | b2b3b4b6b8b9b10b11b13y1y2y3*y3y4y5*y5y6y7y8y12*y12y14y18 | 2224.00 | 106.641 | 108704 | 2 | 1112.50 | 8.67   |
| P0A1H5 EFTU_SALTY Elongation factor Tu | 12 |                                      | FESEVYILSKDEGGR                | 304 | 15 | 3  | 18.16  | b3b7y7                                                   | 1728.85 | 65.947  | 7804   | 2 | 864.93  | 1.84   |
| P0A1H5 EFTU_SALTY Elongation factor Tu | 13 | Carbamidomethyl+C(7)                 | HYAHVDCPGHADYVK                | 75  | 15 | 4  | 18.16  | b6y4y7*y7                                                | 1768.78 | 34.921  | 4739   | 3 | 590.27  | -1.45  |
| P0A1H5 EFTU_SALTY Elongation factor Tu | 14 |                                      | NMITGAAQMDGAILVVAATDGPMPQTR    | 90  | 27 | 6  | 11.92  | b8°b8y7*y7*y7y11                                         | 2729.34 | 127.164 | 2586   | 3 | 910.45  | 0.63   |
| P0A1H5 EFTU_SALTY Elongation factor Tu | 15 |                                      | MVVTLIHPIAMDDGLR               | 358 | 16 | 22 | 195.92 | b3b4°b4b5°b5b7°b7b13y3y4y5°y5y6y7y8y9°y9y10°y10y11y12y13 | 1780.92 | 79.459  | 736193 | 3 | 594.31  | -15.90 |
| P0A1H5 EFTU_SALTY Elongation factor Tu | 16 |                                      | AGENVGVLLR                     | 270 | 10 | 14 | 129.56 | b3b4*b4b5°b5*b5y3y4y5y6y7*y7y8y9                         | 1027.57 | 56.847  | 387741 | 2 | 514.29  | -15.21 |
| P0A1H5 EFTU_SALTY Elongation factor Tu | 17 |                                      | TVGAGVVAK                      | 382 | 9  | 6  | 74.98  | b3y3y5y6y7y8                                             | 801.47  | 29.020  | 174840 | 2 | 401.24  | -22.24 |
| P0A1H5 EFTU_SALTY Elongation factor Tu | 18 |                                      | GYRPQFYFR                      | 325 | 9  | 5  | 45     | b3b4y4y5*y5                                              | 1233.59 | 59.194  | 103174 | 3 | 411.87  | -21.47 |
| P0A1H5 EFTU_SALTY Elongation factor Tu | 19 |                                      | LLDEGR                         | 264 | 6  | 2  | 26.87  | y4y5                                                     | 702.38  | 27.521  | 16288  | 1 | 702.38  | -3.91  |
| P0A1H5 EFTU_SALTY Elongation factor Tu | 20 |                                      | EEIER                          | 284 | 5  | 2  | 13.23  | b3°b3                                                    | 675.33  | 112.564 | 4508   | 1 | 675.33  | 6.06   |
| P0A1H5 EFTU_SALTY Elongation factor Tu | 21 |                                      | TKPHVNVGTIGHVDHGK              | 8   | 17 | 3  | 16.34  | b12y3y8                                                  | 1795.93 | 34.314  | 2816   | 4 | 449.74  | -16.58 |
| P0A1H5 EFTU_SALTY Elongation factor Tu | 22 |                                      | HTPFFK                         | 319 | 6  | 1  | 13.63  | y4                                                       | 776.40  | 53.419  | 2127   | 2 | 388.70  | -8.65  |
| P0A1H5 EFTU_SALTY Elongation factor Tu | 23 |                                      | GTVVTGRVER                     | 224 | 10 | 6  | 58.17  | b4b5b6b9°b9y3                                            | 1073.60 | 26.267  | 23698  | 2 | 537.30  | -10.35 |
| P0A1H5 EFTU_SALTY Elongation factor Tu | 24 | Carbamidomethyl+C(14)                | QVGVPYIIVFLNKCDMVDDEELLELVEMEV | 124 | 31 | 6  | 49.99  | y3y5°y5y6y7y8                                            | 3694.86 | 128.113 | 21536  | 3 | 1232.29 | 5.68   |
| P0A1H5 EFTU_SALTY Elongation factor Tu | 25 |                                      | GSALKALEGDAEWEAK               | 172 | 16 | 3  | 17.18  | b11b14y8                                                 | 1674.82 | 88.649  | 4593   | 2 | 837.91  | -7.94  |
| P0A1H5 EFTU_SALTY Elongation factor Tu | 26 |                                      | FESEVYILSKDEGGR                | 304 | 15 | 3  | 18.16  | b6b8y12                                                  | 1728.86 | 97.051  | 3667   | 2 | 864.94  | 11.16  |
| P0A1H5 EFTU_SALTY Elongation factor Tu | 27 |                                      | ARGITINTSHVEYDTPTR             | 57  | 18 | 3  | 23     | b3b4y5                                                   | 2031.02 | 94.725  | 2849   | 3 | 677.68  | -3.43  |
| P0A1H5 EFTU_SALTY Elongation factor Tu | 28 | Carbamidomethyl+C(3)                 | STCTGVEMFRK                    | 253 | 11 | 4  | 24.33  | b6b10y5°y5                                               | 1315.62 | 136.465 | 1540   | 1 | 1315.62 | 7.89   |
| P0A1H5 EFTU_SALTY Elongation factor Tu | 29 | Oxidation+M(1)                       | MVVTLIHPIAMDDGLR               | 358 | 16 | 7  | 56.34  | b3b4y4y8y9y10°y10                                        | 1796.92 | 74.234  | 56759  | 3 | 599.64  | -11.55 |
| P0A1H5 EFTU_SALTY Elongation factor Tu | 30 | Carbamidomethyl+C(3); Oxidation+M(8) | STCTGVEMFRK                    | 253 | 11 | 4  | 24.33  | b3°b3y3y9                                                | 1331.59 | 43.811  | 4661   | 3 | 444.54  | -12.19 |
| P0A1H5 EFTU_SALTY Elongation factor Tu | 31 | Oxidation+M(16)                      | TTDVTGTIELPEGVEMVMPGDNIK       | 334 | 24 | 4  | 12.72  | b4y8*y8y13                                               | 2562.27 | 80.208  | 2169   | 2 | 1281.64 | 14.77  |
| P0A1H5 EFTU_SALTY Elongation factor Tu | 32 |                                      | TINTSHVEYDTPTR                 | 61  | 14 | 9  | 42.89  | b3°b3b4°b4*b4b9°b9*b9b10                                 | 1633.79 | 50.064  | 16706  | 2 | 817.40  | 4.18   |
| P0A1H5 EFTU_SALTY Elongation factor Tu | 33 |                                      | NTSHVEYDTPTR                   | 63  | 12 | 6  | 24.89  | b4°b4*b4b6b8°b8                                          | 1419.65 | 50.075  | 3873   | 2 | 710.33  | 3.27   |
| P0A1H5 EFTU_SALTY Elongation factor Tu | 34 |                                      | INTSHVEYDTPTR                  | 62  | 13 | 5  | 25.56  | b3°b3b9b10°b10                                           | 1532.74 | 50.094  | 3267   | 2 | 766.87  | 4.86   |
| P0A1H5 EFTU_SALTY Elongation factor Tu | 35 |                                      | GHADYVK                        | 83  | 7  | 1  | 7.26   | b3                                                       | 789.39  | 34.952  | 1518   | 1 | 789.39  | 4.48   |
| P0A1H5 EFTU_SALTY Elongation factor Tu | 36 |                                      | GITINTSHVEYDTPTR               | 59  | 16 | 0  | 4.44   |                                                          | 1785.86 | 50.061  | 19335  | 3 | 595.96  | -3.96  |

|                                            |    |                                       |                                   |     |    |    |        |                                                                                                      |         |         |        |   |         |        |
|--------------------------------------------|----|---------------------------------------|-----------------------------------|-----|----|----|--------|------------------------------------------------------------------------------------------------------|---------|---------|--------|---|---------|--------|
| [P0A1S2]HNS_SALTY DNA-binding protein H-NS | 1  |                                       | EMLIADGIDPNELLNSMAAAK             | 62  | 21 | 38 | 280.73 | b2b3°b3b4°b4b5°b5b6°b6b7°b7b8b9b12°b12b14°b14°b14b21y1y2y3y4y5y6y7°y7°y7y8y9y10y13y14y15y16y17y18y21 | 2216.12 | 97.598  | 432108 | 2 | 1108.56 | 11.35  |
| [P0A1S2]HNS_SALTY DNA-binding protein H-NS | 2  |                                       | REEESAAAAEVEER                    | 40  | 14 | 23 | 178.07 | b2b3b4b6°b6b7°b7b8b10b11b13b14y1y2y4y5°y5y6y7y9°y9y12y14                                             | 1575.73 | 32.518  | 118376 | 2 | 788.37  | 6.04   |
| [P0A1S2]HNS_SALTY DNA-binding protein H-NS | 3  |                                       | YSYVDENGETK                       | 96  | 11 | 9  | 87.26  | b4y2y4y5y7y8y9y10y11                                                                                 | 1304.57 | 33.701  | 92824  | 2 | 652.79  | 1.22   |
| [P0A1S2]HNS_SALTY DNA-binding protein H-NS | 4  |                                       | TPAVIKK                           | 114 | 7  | 8  | 53.73  | b2y1y2y3y4y5y6y7                                                                                     | 756.49  | 20.275  | 10758  | 2 | 378.75  | -12.02 |
| [P0A1S2]HNS_SALTY DNA-binding protein H-NS | 5  |                                       | LQQYREMLIADGIDPNELLNSMAAAK        | 57  | 26 | 4  | 12.15  | b8y10°y10y14                                                                                         | 2904.50 | 137.117 | 7986   | 3 | 968.84  | 14.46  |
| [P0A1S2]HNS_SALTY DNA-binding protein H-NS | 6  | Carbamidomethyl+C(2)                  | ECTLETLEEMLEKLEVVVNER             | 19  | 21 | 25 | 241.74 | b3°b3b4°b4b6b14°b14y3°y3y4°y4y5y6y7y8y9y10y11y12y13y14y15y16y17y19                                   | 2563.25 | 124.214 | 206669 | 3 | 855.09  | -4.57  |
| [P0A1S2]HNS_SALTY DNA-binding protein H-NS | 7  |                                       | YSYVDENGETKKTWTGQGR               | 96  | 18 | 12 | 95.4   | b3°b3y4y5y6°y6y11°y11y12y13y15y16                                                                    | 2090.93 | 47.419  | 99752  | 3 | 697.65  | -3.85  |
| [P0A1S2]HNS_SALTY DNA-binding protein H-NS | 8  |                                       | AARPAKYSYVDENGETK                 | 90  | 17 | 3  | 16.34  | b9y5y10                                                                                              | 1898.94 | 53.175  | 11781  | 4 | 475.49  | 7.65   |
| [P0A1S2]HNS_SALTY DNA-binding protein H-NS | 9  |                                       | EEESAAAAEVEERTR                   | 41  | 15 | 4  | 18.16  | b3b13y10°y10                                                                                         | 1676.76 | 67.706  | 5037   | 4 | 419.95  | -7.64  |
| [P0A1S2]HNS_SALTY DNA-binding protein H-NS | 10 | Carbamidomethyl+C(6); Oxidation+M(14) | AQARECTLETLEEMLEK                 | 15  | 17 | 4  | 16.34  | b12y9y12°y12                                                                                         | 2066.97 | 85.294  | 3493   | 3 | 689.66  | -2.72  |
| [P0A1S2]HNS_SALTY DNA-binding protein H-NS | 11 |                                       | MLIADGIDPNELLNSMAAAK              | 63  | 20 | 2  | 12.7   | b6b11                                                                                                | 2087.02 | 97.647  | 9574   | 3 | 696.35  | -13.10 |
| [P25077]MDH_SALTY Malate dehydrogenase     | 1  |                                       | VAVLGAAGGIGQALALLK                | 2   | 19 | 31 | 343.63 | b2b3b4b5b6b7b8b9b10b11b15b16b17b18b19y1y2y3y4y5y6y7y9y10y11y12y13y14y15y16y19                        | 1735.08 | 120.358 | 234676 | 2 | 868.05  | -0.35  |
| [P25077]MDH_SALTY Malate dehydrogenase     | 2  |                                       | NQLPSGSELSLYDIAPVTPGVAVDLSHIPTAVK | 21  | 33 | 33 | 128.14 | b1°b1b2°b2b3°b3b5°b5b8b9°b9°b9b10b12b13°b13b15°b15b23y1y2y3y5°y5y6y7y12y15°y15y18y19y30y33           | 3388.82 | 94.545  | 202275 | 3 | 1130.28 | 5.19   |
| [P25077]MDH_SALTY Malate dehydrogenase     | 3  | Carbamidomethyl+C(2)                  | ACVGIIITNPVNTTVAIAAEVLKK          | 111 | 23 | 15 | 104.4  | b2b3b4b5b10y1y3y8y12y15y16y18y20y21y23                                                               | 2382.33 | 105.156 | 156953 | 3 | 794.78  | -3.79  |
| [P25077]MDH_SALTY Malate dehydrogenase     | 4  |                                       | FFSQPLLLGK                        | 262 | 10 | 10 | 74.41  | b2b3°b3y2y3y4y5y6y8y10                                                                               | 1149.66 | 76.442  | 143141 | 2 | 575.33  | -7.11  |
| [P25077]MDH_SALTY Malate dehydrogenase     | 5  |                                       | IQNAGTEVVEAK                      | 205 | 12 | 22 | 138.37 | b2°b2b3°b3b4b6y1y2y3°y3y4y5y6y8y9y10°y10°y10y11°y11°y11y12                                           | 1258.65 | 35.311  | 111121 | 2 | 629.83  | -7.27  |
| [P25077]MDH_SALTY Malate dehydrogenase     | 6  |                                       | SIGTLSAFEQHSLDAMLDTLKK            | 279 | 22 | 12 | 57.19  | b1b2b10b13y2y5y6y12y16y17y21y22                                                                      | 2405.23 | 95.441  | 105262 | 3 | 802.42  | -2.03  |
| [P25077]MDH_SALTY Malate dehydrogenase     | 7  |                                       | DIQLGEDFINK                       | 301 | 11 | 16 | 76.46  | b2°b2b3°b3b4b10y1y2y4y7y8y9°y9°y9y11°y11                                                             | 1291.65 | 68.614  | 96148  | 2 | 646.33  | -2.93  |
| [P25077]MDH_SALTY Malate dehydrogenase     | 8  |                                       | LFGVTTLDIIR                       | 142 | 11 | 7  | 69.77  | b3b4b5y3y6y9y11                                                                                      | 1247.73 | 89.602  | 81571  | 2 | 624.37  | -6.16  |
| [P25077]MDH_SALTY Malate dehydrogenase     | 9  |                                       | AGGGSATLSMGQAAAR                  | 217 | 16 | 17 | 111.18 | b8b12°b12b13b16y6y7y8y9°y9y10°y10°y10y11°y11y12y16                                                   | 1405.69 | 40.693  | 80924  | 2 | 703.35  | -0.09  |

|                                       |    |                   |                                            |     |    |    |        |                                                                                           |         |         |        |   |         |        |
|---------------------------------------|----|-------------------|--------------------------------------------|-----|----|----|--------|-------------------------------------------------------------------------------------------|---------|---------|--------|---|---------|--------|
| P25077 MDH_SALTY Malate dehydrogenase | 10 |                   | SNTFVAELK                                  | 153 | 9  | 9  | 59.99  | b2*b2b4b6b7y2y4y7y9                                                                       | 1008.53 | 54.805  | 69446  | 2 | 504.77  | -6.17  |
| P25077 MDH_SALTY Malate dehydrogenase | 11 |                   | SDLFNVNAGIVK                               | 87  | 12 | 13 | 79.88  | b1°b1b2b3b4y2y4y6*y6y7y8y9y12                                                             | 1276.68 | 70.311  | 59952  | 2 | 638.85  | -4.40  |
| P25077 MDH_SALTY Malate dehydrogenase | 12 |                   | FGLSLVR                                    | 233 | 7  | 3  | 40.5   | y4y5y6                                                                                    | 791.46  | 67.205  | 77123  | 2 | 396.23  | -20.36 |
| P25077 MDH_SALTY Malate dehydrogenase | 13 |                   | NLVQQIAK                                   | 99  | 8  | 5  | 49.36  | b3b4b6*b6y6                                                                               | 913.53  | 49.572  | 62767  | 2 | 457.27  | -14.30 |
| P25077 MDH_SALTY Malate dehydrogenase | 14 |                   | SIGTLSAFEQHSLDAMLDTLK                      | 279 | 21 | 3  | 13.89  | b9b11y8                                                                                   | 2277.13 | 101.382 | 5603   | 3 | 759.71  | -6.00  |
| P25077 MDH_SALTY Malate dehydrogenase | 15 |                   | NGVEER                                     | 272 | 6  | 1  | 13.63  | y5                                                                                        | 703.34  | 32.351  | 4261   | 1 | 703.34  | 0.26   |
| P25077 MDH_SALTY Malate dehydrogenase | 16 |                   | IKGFSGEDATPALEGADVVLISAGVAR                | 54  | 27 | 3  | 22.77  | y4y6y7                                                                                    | 2643.40 | 87.787  | 30308  | 3 | 881.81  | 1.57   |
| P25077 MDH_SALTY Malate dehydrogenase | 17 |                   | GKLPTVEVVPVIGGHSGVTILPLLSQIPGVSFTEQEAAELTK | 162 | 42 | 5  | 21.41  | b21y11°y11y12y15                                                                          | 4341.36 | 113.302 | 25744  | 4 | 1086.10 | -0.11  |
| P25077 MDH_SALTY Malate dehydrogenase | 18 |                   | RIQNAGTEVVEAK                              | 204 | 13 | 4  | 20.67  | b4y3y7°y7                                                                                 | 1414.77 | 32.950  | 13022  | 2 | 707.89  | 2.24   |
| P25077 MDH_SALTY Malate dehydrogenase | 19 |                   | SIGTLSAFEQHSLDAMLDTLKK                     | 279 | 22 | 5  | 13.45  | b3°b3b12*b12y13                                                                           | 2405.24 | 81.924  | 4269   | 3 | 802.42  | 2.64   |
| P25077 MDH_SALTY Malate dehydrogenase | 20 | Oxidation+M(16)   | SIGTLSAFEQHSLDAMLDTLKK                     | 279 | 22 | 3  | 23.33  | b8b9b13                                                                                   | 2421.26 | 68.116  | 18345  | 3 | 807.76  | 9.68   |
| P25077 MDH_SALTY Malate dehydrogenase | 21 | Oxidation+M(10)   | AGGGSATLSMGQAAAR                           | 217 | 16 | 5  | 17.18  | b7°b7y8y10°y10                                                                            | 1421.68 | 40.716  | 2771   | 2 | 711.34  | 0.94   |
| P25077 MDH_SALTY Malate dehydrogenase | 22 |                   | IGTLSAFEQHSLDAMLDTLKK                      | 280 | 21 | 4  | 12.53  | b10°b10*b10b13                                                                            | 2318.22 | 95.436  | 42023  | 3 | 773.41  | 8.00   |
| P25077 MDH_SALTY Malate dehydrogenase | 23 |                   | LSMGQAAAR                                  | 224 | 9  | 0  | 4.44   |                                                                                           | 904.46  | 40.743  | 4182   | 2 | 452.74  | -3.58  |
| P0A1D5 CH10_SALTY 10 kDa chaperonin   | 1  |                   | VGDIVIFNDGYGVK                             | 60  | 14 | 27 | 241.79 | b2b3b4°b4b5°b5b6b8b11°b11b13°b13y1y3y4y5y6°y6y7y8°y8y9y10y11y12y13y14                     | 1495.79 | 74.152  | 288608 | 2 | 748.40  | 4.16   |
| P0A1D5 CH10_SALTY 10 kDa chaperonin   | 2  |                   | ILDNGTVQPLDVK                              | 47  | 13 | 34 | 225.15 | b1b2b5*b5b6*b6b7°b7b8°b8°b8b9°b9b10b12y1y2y3y4y5y6°y6°y6y7y8y9*y9y10y11°y11*y11y12y13*y13 | 1411.78 | 58.048  | 270505 | 2 | 706.39  | -0.95  |
| P0A1D5 CH10_SALTY 10 kDa chaperonin   | 3  |                   | SAGGIVLTGSAAGK                             | 20  | 14 | 11 | 109.48 | y2y3y4y6y7y8°y8y9y11y12y14                                                                | 1188.65 | 44.349  | 116070 | 2 | 594.83  | -7.09  |
| P0A1D5 CH10_SALTY 10 kDa chaperonin   | 4  |                   | GEIIAVGK                                   | 37  | 8  | 5  | 54.13  | y3y4y5y6y8                                                                                | 786.46  | 42.164  | 43707  | 2 | 393.74  | -10.17 |
| P0A1D5 CH10_SALTY 10 kDa chaperonin   | 5  |                   | IDNEEVLIMSESDILAIVEA                       | 77  | 20 | 6  | 32.25  | b5°b5b7b8b12y10                                                                           | 2203.11 | 69.839  | 1862   | 3 | 735.04  | 3.21   |
| P0A1D5 CH10_SALTY 10 kDa chaperonin   | 6  | Phosphoryl STY(8) | SAGGIVLTGSAAGK                             | 20  | 14 | 5  | 38.77  | b7b9_H3PO4b9b11°b11b12                                                                    | 1268.62 | 51.354  | 2462   | 3 | 423.55  | 6.45   |
| P64076 ENO_SALTY Enolase              | 1  |                   | FNQIGSLTETLAAIK                            | 342 | 15 | 31 | 281.89 | b2*b2b3*b3b4*b4b5b6b7°b7b8b9b10b11b13b14b15y1y2y3y4y6y7y8y9y10y11°y11y12y13y15            | 1605.89 | 86.391  | 252153 | 2 | 803.45  | 1.22   |
| P64076 ENO_SALTY Enolase              | 2  |                   | SGETEDATIADLAVGTAAGQIK                     | 371 | 22 | 33 | 253.93 | b2b3°b3b5°b5b7b8°b8b11b12°b12b13°b13b14b16b18b22y1y2y4y5y6y7y8y9y10y11y12*y12y13y14y16y22 | 2118.07 | 76.200  | 236501 | 2 | 1059.54 | 7.15   |
| P64076 ENO_SALTY Enolase              | 3  |                   | AVGAVNGPIAQAILGK                           | 66  | 16 | 7  | 42.7   | b5y2y6y10y11y12y16                                                                        | 1478.87 | 75.902  | 154073 | 2 | 739.94  | -0.83  |
| P64076 ENO_SALTY Enolase              | 4  |                   | YSMPVPMMNIIINGGEHADNNVDIQEFMIQPVGAK        | 143 | 34 | 17 | 98.3   | b2°b2b3°b3b4b5y3y5y6*y6y8y9y10y12y13y29y34                                                | 3759.80 | 99.048  | 131986 | 3 | 1253.94 | 9.87   |

|                          |    |                       |                                         |     |    |    |        |                                                                          |         |         |        |   |         |        |
|--------------------------|----|-----------------------|-----------------------------------------|-----|----|----|--------|--------------------------------------------------------------------------|---------|---------|--------|---|---------|--------|
| P64076 ENO_SALTY Enolase | 5  |                       | GMNTAVGDEGGYAPNLGSNAEA<br>LAVIAEAVK     | 200 | 31 | 23 | 117.08 | b2b4b5°b5b6°b6°b6b8b12<br>b13b23y1y2y3y4y6y7y8y1<br>0y13y15y18y31        | 2989.46 | 95.725  | 125235 | 3 | 997.16  | 0.74   |
| P64076 ENO_SALTY Enolase | 6  | Carbamidomethyl+C(16) | AAGYELGKDITLAMDCAASEFYK<br>DGK          | 231 | 26 | 25 | 165.88 | b2b3b4b6b8b9°b9b11°b11<br>b15y2y3°y3y5y6y8°y8y9y1<br>0y11y12y13y14y24y26 | 2824.28 | 98.442  | 121651 | 4 | 706.83  | -12.10 |
| P64076 ENO_SALTY Enolase | 7  |                       | AFTSEEFTHFLEELTK                        | 266 | 16 | 23 | 183.66 | b2b3b4°b4b12b13°b13b14<br>b16y1y3y4°y4y5y6y9y10°y<br>10y11y12y13y14y16   | 1928.90 | 103.610 | 107947 | 3 | 643.64  | -11.96 |
| P64076 ENO_SALTY Enolase | 8  |                       | DAGYTAVISHR                             | 360 | 11 | 11 | 87.26  | b2b3y1y2y3y4y5y6y7y9y1<br>1                                              | 1189.59 | 42.039  | 90012  | 2 | 595.30  | -4.62  |
| P64076 ENO_SALTY Enolase | 9  |                       | GIANSILIK                               | 333 | 9  | 8  | 57.55  | b2y1y2y3y4y6y7y9                                                         | 928.57  | 60.949  | 89739  | 2 | 464.79  | -13.34 |
| P64076 ENO_SALTY Enolase | 10 |                       | IQLVGDDLFTVNTK                          | 311 | 14 | 14 | 105.9  | b2°b2b3b4y1y2y4y5y6y9y<br>10y11y12y14                                    | 1562.85 | 78.314  | 80316  | 2 | 781.93  | 1.95   |
| P64076 ENO_SALTY Enolase | 11 |                       | IEEALGEK                                | 411 | 8  | 5  | 40.9   | y1y3y6y7y8                                                               | 888.46  | 31.764  | 41103  | 2 | 444.73  | -9.21  |
| P64076 ENO_SALTY Enolase | 12 |                       | ILKEGIEK                                | 325 | 8  | 8  | 40.9   | y1y2°y2y4y5°y5y6y8                                                       | 929.56  | 29.679  | 38608  | 2 | 465.28  | -8.60  |
| P64076 ENO_SALTY Enolase | 13 |                       | GNPTVEAEVHLEGGFVGMAAAPS<br>GASTGSR      | 16  | 30 | 7  | 29.95  | b7b12°b12b14y7y8y30                                                      | 2856.38 | 92.808  | 30898  | 3 | 952.80  | 8.03   |
| P64076 ENO_SALTY Enolase | 14 |                       | IMIDLDGTENK                             | 92  | 11 | 6  | 41.54  | b10y2y7y8y9°y9                                                           | 1248.61 | 59.723  | 20333  | 2 | 624.81  | -2.44  |
| P64076 ENO_SALTY Enolase | 15 |                       | YVLAGEGNK                               | 257 | 9  | 7  | 54.54  | b9y2y3y5°y5y6y7                                                          | 950.49  | 33.974  | 11130  | 1 | 950.49  | -1.80  |
| P64076 ENO_SALTY Enolase | 16 |                       | SNFGANAILAVSLANAK                       | 103 | 17 | 8  | 23.74  | b1b2°b2°b2b4b6b12y2                                                      | 1660.89 | 79.189  | 2983   | 2 | 830.95  | -7.72  |
| P64076 ENO_SALTY Enolase | 17 | Carbamidomethyl+C(8)  | DITLAMDCAASEFYKDGK                      | 239 | 18 | 5  | 15.6   | b2b3°b3b7y11                                                             | 2034.92 | 94.528  | 2281   | 4 | 509.48  | 1.26   |
| P64076 ENO_SALTY Enolase | 18 |                       | GMPLYEHIAELNGTPGK                       | 126 | 17 | 11 | 79.91  | b3b6b10y3y4y6y10y12°y1<br>2y13°y13                                       | 1826.88 | 67.693  | 110589 | 3 | 609.63  | -19.24 |
| P64076 ENO_SALTY Enolase | 19 |                       | YNQLIR                                  | 405 | 6  | 2  | 26.87  | y3y4                                                                     | 806.44  | 38.875  | 72449  | 2 | 403.72  | -13.40 |
| P64076 ENO_SALTY Enolase | 20 |                       | EIIDSR                                  | 10  | 6  | 1  | 13.63  | b4                                                                       | 732.38  | 29.032  | 17599  | 1 | 732.38  | -8.42  |
| P64076 ENO_SALTY Enolase | 21 |                       | MGSEVFHHLAK                             | 184 | 11 | 3  | 27.34  | b3b4y7                                                                   | 1255.61 | 43.669  | 12265  | 3 | 419.21  | -12.44 |
| P64076 ENO_SALTY Enolase | 22 |                       | EALELR                                  | 46  | 6  | 3  | 40.1   | b4b5y3                                                                   | 730.41  | 41.064  | 12173  | 1 | 730.41  | -5.26  |
| P64076 ENO_SALTY Enolase | 23 | Carbamidomethyl+C(8)  | DITLAMDCAASEFYK                         | 239 | 15 | 5  | 31.85  | b3°b3b4y3y7                                                              | 1734.74 | 72.339  | 5715   | 4 | 434.44  | -19.91 |
| P64076 ENO_SALTY Enolase | 24 |                       | VLGDKIQLVGDDLFTVNTK                     | 306 | 19 | 10 | 53.78  | b4b7°b7y4°y4y5y6y10°y1<br>0y17                                           | 2075.12 | 80.231  | 66430  | 3 | 692.38  | -6.71  |
| P64076 ENO_SALTY Enolase | 25 |                       | DGKYVLAGEGNK                            | 254 | 12 | 4  | 26.28  | b11y8y9°y9                                                               | 1250.63 | 44.318  | 59886  | 2 | 625.82  | -7.22  |
| P64076 ENO_SALTY Enolase | 26 |                       | GKGMMNTAVGDEGGYAPNLGSNA<br>EALAVIAEAVK  | 198 | 33 | 7  | 42.18  | b6b7b10b12b14b15y5                                                       | 3174.59 | 90.563  | 29253  | 3 | 1058.87 | 6.08   |
| P64076 ENO_SALTY Enolase | 27 |                       | EIIDSRGNPTVEAEVHLEGGFVG<br>MAAPSGASTGSR | 10  | 36 | 7  | 16.64  | b5b12y5°y5y11y14°y14                                                     | 3569.73 | 93.893  | 18234  | 4 | 893.19  | 1.50   |
| P64076 ENO_SALTY Enolase | 28 |                       | IEEALGEKAPYNGR                          | 411 | 14 | 7  | 60.46  | b7y4y5°y5y6y7y9                                                          | 1546.77 | 40.208  | 15536  | 3 | 516.26  | -13.57 |
| P64076 ENO_SALTY Enolase | 29 |                       | AAAAAKGMPLYEHIAELNGTPGK                 | 120 | 23 | 3  | 13.06  | b4b8y8                                                                   | 2310.20 | 51.763  | 12939  | 3 | 770.74  | 4.12   |
| P64076 ENO_SALTY Enolase | 30 |                       | SNFGANAILAVSLANAKAAAAAK                 | 103 | 23 | 3  | 23.15  | b3b4b9                                                                   | 2144.18 | 100.721 | 7758   | 3 | 715.40  | -0.80  |
| P64076 ENO_SALTY Enolase | 31 |                       | SGETEDATIADLAVGTAAGQIKTG<br>SMSR        | 371 | 28 | 3  | 11.71  | b9b13y6                                                                  | 2737.37 | 101.674 | 2496   | 3 | 913.13  | 14.54  |
| P64076 ENO_SALTY Enolase | 32 |                       | DAGYTAVISHRSGETEDATIADLA<br>VGTAAGQIK   | 360 | 33 | 3  | 16.83  | b5b7b11                                                                  | 3288.59 | 68.573  | 2206   | 3 | 1096.87 | -12.69 |
| P64076 ENO_SALTY Enolase | 33 |                       | GYTAVISHR                               | 362 | 9  | 1  | 7.87   | b3                                                                       | 1003.53 | 42.079  | 44804  | 2 | 502.27  | -4.87  |
| P64076 ENO_SALTY Enolase | 34 |                       | LKEGIEK                                 | 326 | 7  | 0  | 1.21   |                                                                          | 816.47  | 29.685  | 30191  | 2 | 408.74  | -14.35 |
| P64076 ENO_SALTY Enolase | 35 |                       | ANSILIK                                 | 335 | 7  | 8  | 38.3   | b3°b3°b3b4°b4°b4b5°b5                                                    | 758.47  | 60.950  | 15949  | 1 | 758.47  | -6.28  |
| P64076 ENO_SALTY Enolase | 36 |                       | LAGEGNK                                 | 259 | 7  | 0  | 1.61   |                                                                          | 688.36  | 33.983  | 6978   | 1 | 688.36  | -1.60  |
| P64076 ENO_SALTY Enolase | 37 |                       | AASEFYKDGK                              | 247 | 10 | 0  | 8.47   |                                                                          | 1115.55 | 98.465  | 6234   | 1 | 1115.55 | 11.93  |
| P64076 ENO_SALTY Enolase | 38 |                       | TSEEFTHFLEELTK                          | 268 | 14 | 3  | 25.56  | b3b10b11                                                                 | 1710.84 | 103.649 | 2432   | 2 | 855.92  | 7.85   |
| P64076 ENO_SALTY Enolase | 39 |                       | AFTSEEFTHFLEELTK                        | 266 | 16 | 0  | 4.44   |                                                                          | 1910.89 | 103.614 | 3742   | 3 | 637.64  | -11.50 |
| P64076 ENO_SALTY Enolase | 40 |                       | DAGYTAVISHR                             | 360 | 11 | 3  | 27.34  | b7b8y8                                                                   | 1171.57 | 41.986  | 1714   | 3 | 391.19  | -11.77 |

|                                                           |    |                                                      |                                  |     |    |    |        |                                                                                                                    |         |         |        |   |         |        |
|-----------------------------------------------------------|----|------------------------------------------------------|----------------------------------|-----|----|----|--------|--------------------------------------------------------------------------------------------------------------------|---------|---------|--------|---|---------|--------|
| [P0A1P0]G3P1_SALTY Glyceraldehyde-3-phohate dehydrogenase | 1  |                                                      | VINDNFGIIEGLMTTVHATTATQK         | 160 | 24 | 41 | 298.51 | b2b3b4*b4b5°b5*b5b6°b6*b6b7*b7b8*b8b17y1y3y4y6y7*y7y8*y8y9y10y11y12y14y15°y15y16°y16y17y18*y18y19y20y22°y22y24*y24 | 2574.32 | 98.608  | 481927 | 3 | 858.78  | 0.38   |
| [P0A1P0]G3P1_SALTY Glyceraldehyde-3-phohate dehydrogenase | 2  |                                                      | LVSWYDNETGYSNK                   | 307 | 14 | 17 | 146.17 | b2b6b7b12y2y3°y3y5y6°y6y7y8y9y10y11y12y14                                                                          | 1675.77 | 58.880  | 269851 | 2 | 838.39  | 5.39   |
| [P0A1P0]G3P1_SALTY Glyceraldehyde-3-phohate dehydrogenase | 3  |                                                      | AGIALNDNFVK                      | 296 | 11 | 18 | 123.94 | b3b4b10b11y1y2y3y4*y4y5°y5*y5y6y7y8*y8y10y11                                                                       | 1161.62 | 62.038  | 243338 | 2 | 581.31  | -4.62  |
| [P0A1P0]G3P1_SALTY Glyceraldehyde-3-phohate dehydrogenase | 4  |                                                      | GASQNIIPSSTGAAK                  | 198 | 15 | 25 | 186.94 | b3°b3b5*b5b6*b6b7°b7*b7b10b11b13y1y2y4y5°y5y6y7y8°y8y9y10y11y15                                                    | 1401.73 | 41.592  | 216638 | 2 | 701.37  | -3.48  |
| [P0A1P0]G3P1_SALTY Glyceraldehyde-3-phohate dehydrogenase | 5  |                                                      | AATYEQIK                         | 249 | 8  | 7  | 49.36  | b6b8y5y6°y6y7y8                                                                                                    | 923.47  | 31.566  | 158085 | 2 | 462.24  | -12.95 |
| [P0A1P0]G3P1_SALTY Glyceraldehyde-3-phohate dehydrogenase | 6  |                                                      | VLDLIAHISK                       | 321 | 10 | 9  | 87.64  | b3y2y3y4y5y6y7y8y10                                                                                                | 1108.66 | 65.497  | 141633 | 2 | 554.84  | -8.70  |
| [P0A1P0]G3P1_SALTY Glyceraldehyde-3-phohate dehydrogenase | 7  |                                                      | VPTPNVSVVDLTVR                   | 232 | 14 | 13 | 126.4  | b3y2y3y4y5y6y7y9y10y11y12°y12y14                                                                                   | 1495.85 | 71.649  | 138465 | 2 | 748.43  | 1.88   |
| [P0A1P0]G3P1_SALTY Glyceraldehyde-3-phohate dehydrogenase | 8  |                                                      | SDIEIVAINDLLAEYMayMLK            | 24  | 22 | 22 | 146.12 | b1b2b3b4°b4b5b6b7b10*b10b14b21y1y2y3y4y5y6y9y10y14y22                                                              | 2530.24 | 126.444 | 67503  | 3 | 844.08  | -2.51  |
| [P0A1P0]G3P1_SALTY Glyceraldehyde-3-phohate dehydrogenase | 9  |                                                      | VLPELNGK                         | 217 | 8  | 9  | 57.14  | b2y2y3y4y6°y6*y6y7y8                                                                                               | 869.50  | 45.384  | 62218  | 2 | 435.25  | -12.42 |
| [P0A1P0]G3P1_SALTY Glyceraldehyde-3-phohate dehydrogenase | 10 |                                                      | VVLTGPSKDNTPMFVK                 | 116 | 16 | 10 | 49.13  | y1y2y3y5y10*y10y13y14y16*y16                                                                                       | 1732.91 | 58.095  | 49654  | 3 | 578.31  | -14.51 |
| [P0A1P0]G3P1_SALTY Glyceraldehyde-3-phohate dehydrogenase | 11 |                                                      | WDEVGVDVVAEATGIFLTDETAR<br>K     | 84  | 24 | 6  | 16.89  | b4b9°b9y6y9y24                                                                                                     | 2621.29 | 86.765  | 24014  | 3 | 874.44  | -5.77  |
| [P0A1P0]G3P1_SALTY Glyceraldehyde-3-phohate dehydrogenase | 12 | Carbamidomethyl+C(20)                                | GVLGYTEDDVVSTDFNGEVCTSV<br>FDAK  | 269 | 27 | 9  | 46.59  | b4b5b7b11b14b18y4°y4y12                                                                                            | 2924.27 | 94.537  | 4385   | 3 | 975.43  | -14.69 |
| [P0A1P0]G3P1_SALTY Glyceraldehyde-3-phohate dehydrogenase | 13 |                                                      | AAAEGEMK                         | 261 | 8  | 3  | 36.13  | b3b6y7                                                                                                             | 806.38  | 89.128  | 3124   | 1 | 806.38  | 9.46   |
| [P0A1P0]G3P1_SALTY Glyceraldehyde-3-phohate dehydrogenase | 14 |                                                      | WDEVGVDVVAEATGIFLTDETAR          | 84  | 23 | 3  | 22.09  | b10y11y12                                                                                                          | 2493.18 | 74.739  | 1618   | 3 | 831.73  | -14.59 |
| [P0A1P0]G3P1_SALTY Glyceraldehyde-3-phohate dehydrogenase | 15 | Carbamidomethyl+C(18)<br>;Carbamidomethyl+C(22)<br>) | GANFDKYEGQDIVSNASCTTNCL<br>APLAK | 132 | 28 | 36 | 335.54 | b3b4b5b6b7°b7*b7b8b10°b10b11*b11b12°b12b13b15b16b21b24*b24b26b27y3y4y5y6y8y9y10y11y12°y12y13y14y15y16              | 3044.42 | 67.252  | 274471 | 3 | 1015.48 | 3.05   |
| [P0A1P0]G3P1_SALTY Glyceraldehyde-3-phohate dehydrogenase | 16 |                                                      | TVDGPSHKDWR                      | 184 | 11 | 3  | 24.33  | b10y8y10                                                                                                           | 1297.63 | 72.216  | 14219  | 2 | 649.32  | 3.10   |
| [P0A1P0]G3P1_SALTY Glyceraldehyde-3-phohate dehydrogenase | 17 |                                                      | DNTPMFVKGANFDK                   | 124 | 14 | 3  | 27.09  | y5y7y8                                                                                                             | 1583.77 | 75.357  | 7596   | 2 | 792.39  | 13.72  |

|                                                                 |    |                 |                                  |     |    |    |        |                                                            |         |         |        |   |        |        |
|-----------------------------------------------------------------|----|-----------------|----------------------------------|-----|----|----|--------|------------------------------------------------------------|---------|---------|--------|---|--------|--------|
| P0A1P0 G3P1_SALTY Glyceraldehyde-3-phohate dehydrogenase        | 18 |                 | KHITAGAK                         | 107 | 8  | 5  | 67.37  | y3y4y5y6y7                                                 | 825.48  | 12.751  | 6369   | 2 | 413.25 | -13.38 |
| P0A1P0 G3P1_SALTY Glyceraldehyde-3-phohate dehydrogenase        | 19 |                 | GGRGASQNIPSSSTGAAK               | 195 | 18 | 3  | 15.6   | b6b15y8                                                    | 1671.90 | 51.271  | 4141   | 3 | 557.97 | 12.78  |
| P0A1P0 G3P1_SALTY Glyceraldehyde-3-phohate dehydrogenase        | 20 | Oxidation+M(13) | VINDNFGIIIEGLMTTVHATTATQK        | 160 | 24 | 3  | 22.02  | b14y11y12                                                  | 2590.30 | 77.761  | 2521   | 3 | 864.10 | -7.63  |
| P0A1P0 G3P1_SALTY Glyceraldehyde-3-phohate dehydrogenase        | 21 |                 | DLIAHISK                         | 323 | 8  | 3  | 33.93  | b3b5b6                                                     | 896.51  | 65.483  | 45135  | 2 | 448.76 | -12.59 |
| P0A1P0 G3P1_SALTY Glyceraldehyde-3-phohate dehydrogenase        | 22 |                 | LDLIAHISK                        | 322 | 9  | 2  | 20.7   | b3b6                                                       | 1009.60 | 65.482  | 44995  | 2 | 505.30 | -6.59  |
| P0A1P0 G3P1_SALTY Glyceraldehyde-3-phohate dehydrogenase        | 23 |                 | LIAHISK                          | 324 | 7  | 0  | 2.02   |                                                            | 781.48  | 65.466  | 2674   | 2 | 391.25 | -13.20 |
| P0A1P0 G3P1_SALTY Glyceraldehyde-3-phohate dehydrogenase        | 24 |                 | LPELNGK                          | 218 | 7  | 0  | 1.21   |                                                            | 770.43  | 45.386  | 1771   | 2 | 385.72 | -14.34 |
| P0A1P0 G3P1_SALTY Glyceraldehyde-3-phohate dehydrogenase        | 25 |                 | AATYEQIK                         | 249 | 8  | 0  | 1.21   |                                                            | 906.46  | 31.564  | 32441  | 2 | 453.73 | 3.03   |
| P0A1P0 G3P1_SALTY Glyceraldehyde-3-phohate dehydrogenase        | 26 |                 | VVLTGPSKDNTPMFVK                 | 116 | 16 | 0  | 4.44   |                                                            | 1715.91 | 58.052  | 29834  | 2 | 858.46 | 4.06   |
| P66593 RS6_SALTY 30S ribosomal protein S6                       | 1  |                 | AHYVLMNVEAPQEVIDELETTFR          | 56  | 23 | 24 | 200.99 | b2b3b4b5b6b7b8*b8b9b10b13b15y2y4y5y6y7y8*y8y9y10*y10y13y23 | 2704.33 | 110.806 | 169805 | 3 | 902.11 | -1.08  |
| P66593 RS6_SALTY 30S ribosomal protein S6                       | 2  |                 | YSAAITGAEGK                      | 24  | 11 | 12 | 110.71 | b4b7b8y2y3*y3y4y5y6y7y9y11                                 | 1067.53 | 34.156  | 91235  | 2 | 534.27 | -5.37  |
| P66593 RS6_SALTY 30S ribosomal protein S6                       | 3  |                 | HAVTEASPMVK                      | 93  | 11 | 15 | 113.72 | b2b4°b4b5°b5b6b7°b7y1y4y5y8y9y10y11                        | 1169.59 | 30.982  | 63227  | 2 | 585.30 | -3.97  |
| P66593 RS6_SALTY 30S ribosomal protein S6                       | 4  |                 | HYEIVFMVHPDQSEQVPGMIER           | 2   | 22 | 3  | 23.33  | b3b5b6                                                     | 2641.26 | 124.869 | 1796   | 3 | 881.09 | 1.29   |
| P66593 RS6_SALTY 30S ribosomal protein S6                       | 5  |                 | QLAYPINK                         | 45  | 8  | 4  | 36.13  | b3b6y5*y5                                                  | 946.53  | 38.002  | 28688  | 2 | 473.77 | -10.90 |
| P66593 RS6_SALTY 30S ribosomal protein S6                       | 6  |                 | FNDAVIR                          | 79  | 7  | 6  | 63.95  | b4y3y4y5y6*y6                                              | 834.45  | 42.612  | 10006  | 1 | 834.45 | -1.39  |
| P66593 RS6_SALTY 30S ribosomal protein S6                       | 7  |                 | SMVMR                            | 86  | 5  | 1  | 13.23  | b3                                                         | 623.31  | 71.795  | 1848   | 1 | 623.31 | 12.63  |
| P66593 RS6_SALTY 30S ribosomal protein S6                       | 8  |                 | HYEIVFMVHPDQSEQVPGMIERYSAITGAEGK | 2   | 33 | 3  | 11.06  | b8y3y12                                                    | 3689.79 | 120.405 | 2006   | 5 | 738.76 | 4.50   |
| P66593 RS6_SALTY 30S ribosomal protein S6                       | 9  |                 | MRHYEIVFMVHPDQSEQVPGMIER         | 0   | 24 | 6  | 19.47  | b4b6°b6b9°b9y11                                            | 2928.36 | 74.135  | 1802   | 4 | 732.85 | -11.92 |
| Q9ZF60 GLTI_SALTY Glutamate/aartate periplasmic-binding protein | 1  |                 | VVGYSQDYSNAIVEAVKK               | 61  | 18 | 23 | 188.37 | b1b2b3b4b6b9y1y2y3y4y5°y5y6y7y8y10y11y12y13*y13y14y16y18   | 1970.00 | 63.980  | 193988 | 3 | 657.34 | -9.73  |
| Q9ZF60 GLTI_SALTY Glutamate/aartate periplasmic-binding protein | 2  |                 | ESSVPFSYYDNQQK                   | 47  | 14 | 9  | 67     | b3b11y4y6y8y9*y9y10y14                                     | 1691.76 | 56.265  | 192994 | 2 | 846.38 | 1.37   |

|                                                                 |    |                                       |                                  |     |    |    |        |                                                                                                        |         |         |        |   |         |        |
|-----------------------------------------------------------------|----|---------------------------------------|----------------------------------|-----|----|----|--------|--------------------------------------------------------------------------------------------------------|---------|---------|--------|---|---------|--------|
| Q9ZF60 GLTI_SALTY Glutamate/aartate periplasmic-binding protein | 3  |                                       | VVGYSQDYSNAIVEAVK                | 61  | 17 | 35 | 274.91 | b2b3b4b6b7b9b10b11°b11b12°b12*b12b13b14*b14b16°b16y1y2y3y4°y4y5y9y10*y10y11y12°y12*y12y13y14*y14y15y17 | 1841.94 | 68.544  | 151441 | 2 | 921.47  | 5.37   |
| Q9ZF60 GLTI_SALTY Glutamate/aartate periplasmic-binding protein | 4  |                                       | NGVIVVGHR                        | 38  | 9  | 12 | 89.46  | b2b3*b3b4y1y2y3y4y5y6y7y9                                                                              | 950.54  | 32.982  | 120405 | 2 | 475.78  | -9.82  |
| Q9ZF60 GLTI_SALTY Glutamate/aartate periplasmic-binding protein | 5  |                                       | AVAFMMDDALLAGER                  | 198 | 15 | 14 | 137.24 | b3b4b5b11b12y3y4y9y10°y10y11y12y13y15                                                                  | 1609.78 | 85.367  | 97229  | 2 | 805.39  | 2.96   |
| Q9ZF60 GLTI_SALTY Glutamate/aartate periplasmic-binding protein | 6  | Carbamidomethyl+C(19)                 | KPDNWEIVGKPQSQEAYGCMLRK          | 217 | 23 | 5  | 24.6   | b7b9y6y9y13                                                                                            | 2734.32 | 57.133  | 84757  | 4 | 684.33  | -10.27 |
| Q9ZF60 GLTI_SALTY Glutamate/aartate periplasmic-binding protein | 7  |                                       | LIPITSQNR                        | 89  | 9  | 6  | 38.3   | b2y5y6°y6y7y9                                                                                          | 1041.60 | 43.523  | 66303  | 2 | 521.30  | -9.02  |
| Q9ZF60 GLTI_SALTY Glutamate/aartate periplasmic-binding protein | 8  |                                       | QAAFSDTIFVVGTR                   | 122 | 14 | 7  | 39.87  | b3b5b10y1y6y12y14                                                                                      | 1511.79 | 77.539  | 29364  | 2 | 756.40  | 3.71   |
| Q9ZF60 GLTI_SALTY Glutamate/aartate periplasmic-binding protein | 9  | Carbamidomethyl+C(21)                 | AKKPDNWEIVGKPQSQEAYGCMLR         | 215 | 24 | 4  | 23.45  | b19y7y8y12                                                                                             | 2805.36 | 58.943  | 18703  | 4 | 702.10  | -6.61  |
| Q9ZF60 GLTI_SALTY Glutamate/aartate periplasmic-binding protein | 10 |                                       | LMDDTIAQAQTSGEAEK                | 247 | 17 | 6  | 34.05  | b5°b5b7y3y8y9                                                                                          | 1807.86 | 46.914  | 12808  | 2 | 904.43  | 9.93   |
| Q9ZF60 GLTI_SALTY Glutamate/aartate periplasmic-binding protein | 11 |                                       | LTTAMLVMGLSAGLAHAEDGAP AAGSTLDK  | 5   | 30 | 3  | 11.39  | b27y10y14                                                                                              | 2869.39 | 94.334  | 28140  | 3 | 957.14  | -17.19 |
| Q9ZF60 GLTI_SALTY Glutamate/aartate periplasmic-binding protein | 12 | Carbamidomethyl+C(19)                 | KPDNWEIVGKPQSQEAYGCMLR           | 217 | 22 | 4  | 24.25  | b6b7b9y5                                                                                               | 2606.21 | 62.363  | 24696  | 4 | 652.31  | -14.80 |
| Q9ZF60 GLTI_SALTY Glutamate/aartate periplasmic-binding protein | 13 | Carbamidomethyl+C(22)                 | LIPITSQNRIPLLQNGTFDFECGSTT NNLER | 89  | 31 | 9  | 60.23  | y4*y4y6y8°y8y9y10y11y21                                                                                | 3548.80 | 87.633  | 261385 | 3 | 1183.61 | 6.67   |
| Q9ZF60 GLTI_SALTY Glutamate/aartate periplasmic-binding protein | 14 |                                       | IISAKDHGDSFR                     | 180 | 12 | 3  | 26.28  | b11y10y11                                                                                              | 1345.69 | 58.000  | 15130  | 2 | 673.35  | -0.64  |
| Q9ZF60 GLTI_SALTY Glutamate/aartate periplasmic-binding protein | 15 |                                       | LMDDTIAQAQTSGEAEKWFDK            | 247 | 21 | 3  | 23.54  | y5y6y19                                                                                                | 2384.09 | 70.384  | 11700  | 3 | 795.37  | -7.37  |
| Q9ZF60 GLTI_SALTY Glutamate/aartate periplasmic-binding protein | 16 |                                       | KLMDDTIAQAQTSGEAEK               | 246 | 18 | 6  | 26.61  | b4y7°y7y8°y8y10                                                                                        | 1935.94 | 44.719  | 5387   | 3 | 645.98  | 3.41   |
| Q9ZF60 GLTI_SALTY Glutamate/aartate periplasmic-binding protein | 17 | Phosphoryl STY(5)                     | AVVVTSGTTSEILLHK                 | 154 | 16 | 4  | 27.7   | b3b6_H3PO4 b6b12y13                                                                                    | 1734.92 | 81.457  | 20967  | 3 | 578.98  | 12.59  |
| Q9ZF60 GLTI_SALTY Glutamate/aartate periplasmic-binding protein | 18 | Phosphoryl STY(18)                    | NGVIVVGHRESSVPFSYYDNQQK          | 38  | 23 | 3  | 13.06  | b3b19y4                                                                                                | 2703.25 | 93.269  | 3635   | 3 | 901.76  | 2.17   |
| Q9ZF60 GLTI_SALTY Glutamate/aartate periplasmic-binding protein | 19 | Carbamidomethyl+C(21);Oxidation+M(22) | AKKPDNWEIVGKPQSQEAYGCMLR         | 215 | 24 | 3  | 12.72  | b9b11y7                                                                                                | 2821.38 | 114.178 | 8505   | 3 | 941.13  | 1.21   |
| Q9ZF60 GLTI_SALTY Glutamate/aartate periplasmic-binding protein | 20 | Oxidation+M(2)                        | LMDDTIAQAQTSGEAEK                | 247 | 17 | 4  | 16.34  | b6b8°b8y6                                                                                              | 1823.83 | 57.278  | 4764   | 3 | 608.62  | -0.27  |



|                                                                 |    |                       |                              |     |    |    |        |                                                                                   |         |         |        |   |        |        |
|-----------------------------------------------------------------|----|-----------------------|------------------------------|-----|----|----|--------|-----------------------------------------------------------------------------------|---------|---------|--------|---|--------|--------|
| Q9ZF60 GLTI_SALTY Glutamate/aartate periplasmic-binding protein | 21 | Carbamidomethyl+C(13) | IVGK PQS QEAYGCMLRK          | 223 | 17 | 0  | 7.26   |                                                                                   | 1964.99 | 57.153  | 3652   | 3 | 655.67 | -8.01  |
| P67091 UF_SALTY Universal stress protein F                      | 1  |                       | TILVPIDISDSELTQR             | 3   | 16 | 23 | 150.2  | b2°b2b3°b3b4°b4y2*y2y3y4y6*y6y7y8y9*y9y10y12°y12*y12y13y14y16                     | 1799.98 | 82.833  | 99040  | 2 | 900.49 | 4.00   |
| P67091 UF_SALTY Universal stress protein F                      | 2  | Carbamidomethyl+C(4)  | HAECSVLVVR                   | 134 | 10 | 8  | 28.7   | b1b2b3°b3b10y8y9°y9                                                               | 1169.60 | 41.948  | 49449  | 2 | 585.31 | -5.53  |
| P67091 UF_SALTY Universal stress protein F                      | 3  |                       | SQLEAIKK                     | 69  | 9  | 8  | 45     | b2b6°b6b8y2y3y7y9                                                                 | 1029.63 | 45.113  | 26453  | 2 | 515.32 | 0.59   |
| P67091 UF_SALTY Universal stress protein F                      | 4  |                       | VQAHVAEGSPK                  | 85  | 11 | 13 | 87.26  | b1b2b5y1y2y3y5y6y7°y7y8y9y11                                                      | 1122.59 | 19.161  | 15702  | 2 | 561.80 | -3.26  |
| P67091 UF_SALTY Universal stress protein F                      | 5  |                       | VQAHVAEGSPKDK                | 85  | 13 | 8  | 43.14  | b2*b2y2y4y6y7y8y13                                                                | 1365.69 | 16.393  | 14895  | 3 | 455.90 | -13.05 |
| P67091 UF_SALTY Universal stress protein F                      | 6  |                       | LPADMVIIASHRPDITTYLLGSNAAVVR | 105 | 29 | 3  | 22.73  | b5b6b10                                                                           | 3064.62 | 89.694  | 5808   | 4 | 766.91 | -12.43 |
| P67091 UF_SALTY Universal stress protein F                      | 7  |                       | LEAIKK                       | 71  | 7  | 0  | 1.61   |                                                                                   | 814.53  | 45.121  | 4428   | 2 | 407.77 | -11.39 |
| P67091 UF_SALTY Universal stress protein F                      | 8  |                       | QAHVAEGSPK                   | 86  | 10 | 4  | 36.09  | b3*b3b5b7                                                                         | 1023.52 | 19.170  | 3780   | 2 | 512.26 | -6.26  |
| P67091 UF_SALTY Universal stress protein F                      | 9  |                       | AHVAEGSPK                    | 87  | 9  | 1  | 7.87   | b3                                                                                | 895.46  | 19.179  | 2106   | 2 | 448.23 | -5.04  |
| Q7CQ05 GRCA_SALTY Autonomous glycy1 radical cofactor            | 1  |                       | MITGIQITK                    | 0   | 9  | 6  | 38.3   | b2y2y3y6y7y9                                                                      | 1004.57 | 55.541  | 125064 | 2 | 502.79 | -9.11  |
| Q7CQ05 GRCA_SALTY Autonomous glycy1 radical cofactor            | 2  |                       | SGFAEDEVVAVSK                | 35  | 13 | 11 | 56.38  | b2b3b9b13y2°y2y4y8y9y10y13                                                        | 1337.66 | 55.123  | 85262  | 2 | 669.33 | 1.28   |
| Q7CQ05 GRCA_SALTY Autonomous glycy1 radical cofactor            | 3  |                       | LGEIEYR                      | 48  | 7  | 6  | 40.5   | b3y2y4y6°y6y7                                                                     | 879.45  | 42.761  | 84856  | 2 | 440.23 | -10.97 |
| Q7CQ05 GRCA_SALTY Autonomous glycy1 radical cofactor            | 4  |                       | FNSLTPEQQR                   | 106 | 10 | 17 | 113.32 | b2*b2b3°b3b5b6b10y1y3y4°y4y5y6y7y8°y8y10                                          | 1219.60 | 38.672  | 60479  | 2 | 610.31 | -1.60  |
| Q7CQ05 GRCA_SALTY Autonomous glycy1 radical cofactor            | 5  |                       | EIPMEVKPEVR                  | 55  | 11 | 7  | 65.56  | y2y4y6y7y8y9y11                                                                   | 1326.71 | 48.968  | 60249  | 2 | 663.86 | 0.74   |
| Q7CQ05 GRCA_SALTY Autonomous glycy1 radical cofactor            | 6  |                       | AANDDLLNSFWLLDSEK            | 9   | 17 | 5  | 26.18  | b3b6b10y4y17                                                                      | 1950.96 | 88.670  | 50559  | 2 | 975.98 | 8.57   |
| Q7CQ05 GRCA_SALTY Autonomous glycy1 radical cofactor            | 7  |                       | FNSLTPEQQRDIAR               | 106 | 15 | 4  | 18.16  | b6°b6b12y3                                                                        | 1773.90 | 74.139  | 2423   | 2 | 887.46 | -10.87 |
| Q7CQ05 GRCA_SALTY Autonomous glycy1 radical cofactor            | 8  |                       | VEGGQHNLNVNVL                | 66  | 13 | 13 | 135.76 | b3b6b12y3y4*y4y5y6y7y8y11y12°y12                                                  | 1434.76 | 50.538  | 86134  | 3 | 478.92 | -17.61 |
| Q7CQ05 GRCA_SALTY Autonomous glycy1 radical cofactor            | 9  |                       | TFTESL                       | 121 | 6  | 2  | 26.87  | b4b5                                                                              | 697.33  | 56.085  | 37324  | 1 | 697.33 | -8.31  |
| Q7CQ05 GRCA_SALTY Autonomous glycy1 radical cofactor            | 10 |                       | AANDDLLNSFWLLDSEKGEAR        | 9   | 21 | 30 | 260.88 | b3b4b5°b5*b5b6°b6*b6b7°b7b10y4y5y7°y7y8°y8y9°y9y10y11y12y13y14y15y16y17y18y19°y19 | 2364.14 | 93.258  | 177017 | 3 | 788.72 | -3.92  |
| Q7CQ05 GRCA_SALTY Autonomous glycy1 radical cofactor            | 11 |                       | VSGYAVRFNSLTPEQQR            | 99  | 17 | 4  | 26.18  | b5b10b12y5                                                                        | 1951.97 | 82.676  | 6260   | 2 | 976.49 | -12.07 |
| Q7CQ05 GRCA_SALTY Autonomous glycy1 radical cofactor            | 12 |                       | SGFAEDEVVAVSKLGEIEYR         | 35  | 20 | 3  | 14.39  | b3b10y19                                                                          | 2198.10 | 117.054 | 2530   | 3 | 733.37 | -0.89  |
| Q7CQ05 GRCA_SALTY Autonomous glycy1 radical cofactor            | 13 |                       | PMEVKPEVR                    | 57  | 9  | 3  | 18.88  | b3b5°b5                                                                           | 1084.57 | 48.979  | 56907  | 2 | 542.79 | -6.98  |
| Q7CQ05 GRCA_SALTY Autonomous glycy1 radical cofactor            | 14 |                       | TGIQITK                      | 2   | 7  | 3  | 23.3   | b4b5°b5                                                                           | 760.45  | 55.540  | 6198   | 1 | 760.45 | -8.67  |
| Q7CQ05 GRCA_SALTY Autonomous glycy1 radical cofactor            | 15 |                       | EIPMEVKPEVR                  | 55  | 11 | 0  | 2.42   |                                                                                   | 1308.68 | 48.978  | 18953  | 3 | 436.90 | -9.33  |

|                                              |    |                   |                                   |     |    |    |        |                                                                                                            |         |         |        |   |         |        |
|----------------------------------------------|----|-------------------|-----------------------------------|-----|----|----|--------|------------------------------------------------------------------------------------------------------------|---------|---------|--------|---|---------|--------|
| P66038 RISB_SALTY 6                          | 1  |                   | IGQVKDDNITVVWVPGAYELPLA<br>TEALAK | 40  | 29 | 16 | 94.35  | b3b9b10°b10b11°b11b12b<br>13°b13b14°b14y4y12y15y<br>16y29                                                  | 3110.70 | 99.046  | 74867  | 3 | 1037.57 | 6.99   |
| P66038 RISB_SALTY 6                          | 2  |                   | GAEAAALTALEMINVLK                 | 136 | 16 | 21 | 199.9  | b3b4b5°b5b6b7b8°b8b9°b9<br>b12b13b14b15y1y3y4y5y6<br>y8y16                                                 | 1643.91 | 103.585 | 53793  | 2 | 822.46  | 2.75   |
| P66038 RISB_SALTY 6                          | 3  |                   | FNQFINDSLLDGAVDALTR               | 21  | 19 | 20 | 152.31 | b2b3b4°b4b8b11b12y2y4y<br>5y6y8y9°y9y10y13°y13y14<br>y15y19                                                | 2109.08 | 101.939 | 53155  | 2 | 1055.05 | 11.11  |
| P66038 RISB_SALTY 6                          | 4  |                   | ANVAAPDAR                         | 5   | 9  | 7  | 38.3   | b2°b2y2y2y5y6y7y9                                                                                          | 884.45  | 23.530  | 13125  | 2 | 442.73  | -5.93  |
| P66038 RISB_SALTY 6                          | 5  |                   | VAITTIAR                          | 14  | 7  | 3  | 40.5   | y4y5y6                                                                                                     | 743.47  | 44.807  | 7088   | 2 | 372.24  | -15.52 |
| P66038 RISB_SALTY 6                          | 6  |                   | MNIK                              | 0   | 5  | 1  | 13.23  | b3                                                                                                         | 618.36  | 72.101  | 3510   | 1 | 618.36  | -12.34 |
| P66038 RISB_SALTY 6                          | 7  | Oxidation+M(11)   | GAEAAALTALEMINVLK                 | 136 | 16 | 4  | 25.56  | b6°b6b7b10                                                                                                 | 1659.90 | 72.284  | 1518   | 2 | 830.45  | 1.54   |
| Q8ZK80 RL9_SALTY 50S ribosomal<br>protein L9 | 1  |                   | LADVLAANAR                        | 57  | 11 | 18 | 114.51 | b1b2b3b4°b4y1y2y4y5°y5<br>y6°y6y7°y7y8y9y10y11                                                             | 1084.60 | 53.921  | 123822 | 2 | 542.81  | -6.08  |
| Q8ZK80 RL9_SALTY 50S ribosomal<br>protein L9 | 2  |                   | VANLGSLGDQVNVK                    | 8   | 14 | 24 | 179.83 | b2b3b4°b4b9b10°b10b12°<br>b12b13b14y1y3y6y7y8y9y<br>10°y10y11°y11y12°y12y14                                | 1413.76 | 57.403  | 93511  | 2 | 707.39  | -4.40  |
| Q8ZK80 RL9_SALTY 50S ribosomal<br>protein L9 | 3  |                   | MQVILLDK                          | 0   | 8  | 7  | 54.13  | b2°b2y3y4y5y6y8                                                                                            | 959.55  | 64.820  | 78554  | 2 | 480.28  | -11.96 |
| Q8ZK80 RL9_SALTY 50S ribosomal<br>protein L9 | 4  |                   | DIADAVTAAGVDVAK                   | 97  | 15 | 10 | 71.88  | b2b6y6y7°y7y8y9°y9y11y1<br>3                                                                               | 1415.74 | 67.016  | 73920  | 2 | 708.37  | -0.52  |
| Q8ZK80 RL9_SALTY 50S ribosomal<br>protein L9 | 5  |                   | INALETVTIASK                      | 71  | 12 | 7  | 34.29  | b2°b2b3°b3y7y10y11                                                                                         | 1259.72 | 61.767  | 58315  | 2 | 630.36  | -3.20  |
| Q8ZK80 RL9_SALTY 50S ribosomal<br>protein L9 | 6  |                   | LFGSIGTR                          | 89  | 8  | 4  | 33.12  | b4y6°y6y7                                                                                                  | 850.47  | 52.459  | 31006  | 2 | 425.74  | -5.24  |
| Q8ZK80 RL9_SALTY 50S ribosomal<br>protein L9 | 7  |                   | LPNGVLR                           | 116 | 7  | 4  | 40.5   | y4y5°y5y6                                                                                                  | 768.46  | 43.575  | 32694  | 2 | 384.73  | -15.81 |
| Q8ZK80 RL9_SALTY 50S ribosomal<br>protein L9 | 8  |                   | NFLVPK                            | 27  | 6  | 1  | 13.63  | y3                                                                                                         | 717.42  | 51.290  | 19508  | 1 | 717.42  | -13.10 |
| Q8ZK80 RL9_SALTY 50S ribosomal<br>protein L9 | 9  |                   | TTGEHEVNFQVHSEVFAK                | 123 | 18 | 3  | 15.6   | b10y7y11                                                                                                   | 2059.03 | 65.732  | 2509   | 3 | 687.02  | 21.70  |
| Q8ZK80 RL9_SALTY 50S ribosomal<br>protein L9 | 10 |                   | DIADAVTAAGVDVAKSEVR               | 97  | 19 | 3  | 14.96  | b11b14y6                                                                                                   | 1886.96 | 76.242  | 58023  | 3 | 629.66  | -14.23 |
| Q8ZK80 RL9_SALTY 50S ribosomal<br>protein L9 | 11 |                   | AGDEGKLFGSIGTR                    | 83  | 14 | 5  | 30.78  | b10y3y6°y6y7                                                                                               | 1407.71 | 55.047  | 46392  | 3 | 469.91  | -12.40 |
| Q8ZK80 RL9_SALTY 50S ribosomal<br>protein L9 | 12 | Phosphoryl STY(6) | VANLGSLGDQVNVK                    | 8   | 14 | 5  | 19.31  | b4°b4y7y9°y9                                                                                               | 1493.72 | 58.013  | 1757   | 2 | 747.36  | -5.39  |
| P06179 FLIC_SALTY Flagellin                  | 1  |                   | AQILQQAGTSVLAQANQVPQNVL<br>SLLR   | 468 | 27 | 33 | 190.55 | b2°b2b3°b3b4°b4b5°b5b6°<br>b6b7b10°b10b11°b11b15°<br>b15b16b18°b18y1y2y4y5y<br>6y7°y7y9y10y11y12y14y2<br>7 | 2860.60 | 105.978 | 105579 | 3 | 954.21  | 0.85   |
| P06179 FLIC_SALTY Flagellin                  | 2  |                   | SQSALGTAIER                       | 20  | 11 | 13 | 82.03  | b2°b2°b2b3b5y4y5y6y7°y7<br>y9°y9y11                                                                        | 1132.59 | 42.657  | 64826  | 2 | 566.80  | -3.02  |
| P06179 FLIC_SALTY Flagellin                  | 3  |                   | FNSAITNLGNTVNNLTSAR               | 432 | 19 | 15 | 102.69 | b2b11b12°b12b13y3y4y6y<br>7°y7y11y13y14°y14y19                                                             | 2007.04 | 79.113  | 62691  | 2 | 1004.02 | 8.15   |
| P06179 FLIC_SALTY Flagellin                  | 4  |                   | IDAALAQVDTLR                      | 411 | 12 | 12 | 114.12 | b2b3b4y3y4y6y7y8y9y11°y<br>11y12                                                                           | 1285.71 | 61.876  | 51166  | 2 | 643.36  | -0.57  |
| P06179 FLIC_SALTY Flagellin                  | 5  |                   | INSAKDDAAGQAIANR                  | 37  | 16 | 18 | 120.61 | b2°b2b6°b6°b6b10b11y1y<br>3°y3y4y5y7y8y9y10y11y1<br>6                                                      | 1614.80 | 30.836  | 45939  | 3 | 538.94  | -12.62 |
| P06179 FLIC_SALTY Flagellin                  | 6  |                   | QINSQTLGLDTLNVQQK                 | 161 | 17 | 8  | 41.63  | b9b10°b17y5y10y11y12y1<br>7                                                                                | 1900.03 | 66.081  | 43384  | 2 | 950.52  | 7.20   |
| P06179 FLIC_SALTY Flagellin                  | 7  |                   | NANDGISIAQTTEGALNEINNNLQ<br>R     | 66  | 25 | 11 | 22.77  | b2b13b16°b16y2y3y6°y6y<br>9°y9y25                                                                          | 2670.34 | 87.465  | 39100  | 2 | 1335.67 | 10.61  |

|                                                               |    |                      |                                            |     |    |    |        |                                                                                                |         |        |        |   |         |        |
|---------------------------------------------------------------|----|----------------------|--------------------------------------------|-----|----|----|--------|------------------------------------------------------------------------------------------------|---------|--------|--------|---|---------|--------|
| P06179 FLIC_SALTY Flagellin                                   | 8  |                      | AQVINTNSLSLLTQNNLNK                        | 1   | 19 | 7  | 14.96  | b7°b7b9y7°y7*y7y19                                                                             | 2085.15 | 63.253 | 23058  | 3 | 695.72  | 8.31   |
| P06179 FLIC_SALTY Flagellin                                   | 9  |                      | ELAVQSANSTNSQSDLDLSIAEIT<br>QR             | 93  | 26 | 8  | 21.97  | b8°b8b10y3*y3y7y9y26                                                                           | 2805.35 | 71.327 | 19384  | 3 | 935.79  | -0.17  |
| P06179 FLIC_SALTY Flagellin                                   | 10 |                      | DDAAGQAIANR                                | 42  | 11 | 6  | 38.35  | b2b4b9y7y8y11                                                                                  | 1101.52 | 28.900 | 13864  | 2 | 551.27  | -4.10  |
| P06179 FLIC_SALTY Flagellin                                   | 11 |                      | IEDSDYATEVSNMSR                            | 453 | 15 | 4  | 36.75  | y5y6y10y13                                                                                     | 1716.76 | 54.035 | 12003  | 2 | 858.88  | 13.79  |
| P06179 FLIC_SALTY Flagellin                                   | 12 |                      | ASATGLGGTDQK                               | 204 | 12 | 5  | 40.18  | b3°b3b4y3y4                                                                                    | 1105.56 | 28.230 | 4271   | 2 | 553.28  | 10.60  |
| P06179 FLIC_SALTY Flagellin                                   | 13 |                      | YYAK                                       | 229 | 4  | 1  | 12.83  | y3                                                                                             | 544.27  | 90.533 | 2490   | 1 | 544.27  | -6.73  |
| P06179 FLIC_SALTY Flagellin                                   | 14 |                      | LGGADGKTEVVSIGGK                           | 363 | 16 | 3  | 17.18  | b10b12y13                                                                                      | 1487.80 | 58.570 | 10687  | 3 | 496.60  | -6.89  |
| P06179 FLIC_SALTY Flagellin                                   | 15 |                      | ASATGLGGTDQKIDGDLK                         | 204 | 18 | 5  | 15.6   | b12°b12y10y12*y12                                                                              | 1746.86 | 63.808 | 7878   | 3 | 582.96  | -13.98 |
| P06179 FLIC_SALTY Flagellin                                   | 16 |                      | AEGHNFKAQPDLAEEAAATTTENP<br>LQK            | 385 | 26 | 6  | 18.31  | b7b9°b9b13°b13y3                                                                               | 2752.32 | 95.459 | 2682   | 3 | 918.11  | -13.22 |
| P06179 FLIC_SALTY Flagellin                                   | 17 |                      | SDLGAVQNRFNSAITNLGNTVNN<br>LTSAR           | 423 | 28 | 4  | 17.73  | b7°b7b12b14                                                                                    | 2947.54 | 72.991 | 2499   | 3 | 983.18  | 13.00  |
| P06179 FLIC_SALTY Flagellin                                   | 18 |                      | AQPDLEAAATTTENPLQKIDAAL<br>AQVDTLR         | 392 | 31 | 4  | 26.16  | b3b8b11b12                                                                                     | 3235.69 | 95.340 | 1975   | 3 | 1079.24 | 3.24   |
| P0A2H9 DSBA_SALTY Thiol:disulfide<br>interchange protein dsbA | 1  |                      | AAADLQLQGVPMFVNGK                          | 158 | 18 | 28 | 207.05 | b2b4b5b6°b6b7b9b10°b10°<br>*b10b13b17y2y3*y3y4y5y<br>6y7*y7y8y10y11*y11y12y<br>14y18*y18       | 1829.96 | 81.583 | 150942 | 2 | 915.49  | 3.80   |
| P0A2H9 DSBA_SALTY Thiol:disulfide<br>interchange protein dsbA | 2  |                      | YQINPQGMDTSSMDVFVQQYAD<br>TVK              | 176 | 25 | 14 | 42.73  | b2°b2b3b4°b4b14b17y2y4<br>y5y12°y12°y12y25                                                     | 2865.34 | 87.310 | 109017 | 2 | 1433.17 | 12.27  |
| P0A2H9 DSBA_SALTY Thiol:disulfide<br>interchange protein dsbA | 3  |                      | TQTVQSAADIR                                | 116 | 11 | 18 | 94.47  | b2°b2b3°b6b8b9b11y2y5°y<br>5y6y7°y7*y7y8y9°y9y11                                               | 1189.62 | 35.944 | 50341  | 2 | 595.31  | 1.64   |
| P0A2H9 DSBA_SALTY Thiol:disulfide<br>interchange protein dsbA | 4  |                      | YHVEFLGPLGK                                | 77  | 11 | 4  | 35.34  | b3b5y3y8                                                                                       | 1259.66 | 70.148 | 13444  | 3 | 420.56  | -16.67 |
| P0A2H9 DSBA_SALTY Thiol:disulfide<br>interchange protein dsbA | 5  |                      | VFVDAGVK                                   | 128 | 8  | 4  | 36.13  | b3b5°b5y5                                                                                      | 834.47  | 84.482 | 10307  | 1 | 834.47  | 0.00   |
| P0A2H9 DSBA_SALTY Thiol:disulfide<br>interchange protein dsbA | 6  |                      | ELTQAWAVAMALGVEDK                          | 88  | 17 | 4  | 22.96  | b3b8y5y11                                                                                      | 1831.89 | 34.923 | 1727   | 2 | 916.45  | -18.12 |
| P0A2H9 DSBA_SALTY Thiol:disulfide<br>interchange protein dsbA | 7  | Oxidation+M(10)      | ELTQAWAVAMALGVEDK                          | 88  | 17 | 4  | 23.33  | b5b6°b6y10                                                                                     | 1847.91 | 94.095 | 10997  | 2 | 924.46  | -5.55  |
| P17215 LIVJ_SALTY Leu/Ile/Val/Thr-<br>binding protein         | 1  |                      | TQFMGPEGVANVSLSNIAGESAE<br>GLLVTKPK        | 240 | 31 | 32 | 227.25 | b1°b1b2°b2b3°b3b4b5°b5°<br>b5b6b9b11b12y2y3y4y5y6<br>y8y9y13y14y17y18y19y22<br>y26y27y28y29y31 | 3144.64 | 89.134 | 309250 | 3 | 1048.88 | 3.34   |
| P17215 LIVJ_SALTY Leu/Ile/Val/Thr-<br>binding protein         | 2  |                      | NYDQVPANKPIVDAIK                           | 271 | 16 | 14 | 93.75  | b2°b2b3b5y1y2y3y5y7y9y<br>11y14*y14y16                                                         | 1784.93 | 54.302 | 241722 | 3 | 595.65  | -14.91 |
| P17215 LIVJ_SALTY Leu/Ile/Val/Thr-<br>binding protein         | 3  | Carbamidomethyl+C(7) | YVIGHLCSSSTQPASDIYEDEGILM<br>ITPAATAPELTAR | 92  | 38 | 23 | 131.25 | b2b5b7b9b10b11°b11b12°<br>b12°b12b25b26b27°b27y4<br>y6y8y10y11y12y13y15y38                     | 4078.02 | 90.046 | 146440 | 3 | 1360.01 | 10.18  |
| P17215 LIVJ_SALTY Leu/Ile/Val/Thr-<br>binding protein         | 4  |                      | TTGLDSQDGPTAAK                             | 137 | 14 | 26 | 172.05 | b2°b2b3°b3b4b5°b5b8b10°<br>b10b11°b11y2y3y5y6y8°y8<br>y9y10°y10*y10y11y12°y12<br>y14           | 1361.65 | 30.212 | 138921 | 2 | 681.33  | 0.00   |
| P17215 LIVJ_SALTY Leu/Ile/Val/Thr-<br>binding protein         | 5  |                      | ENIDFVYYGGYHPEMGQILR                       | 212 | 20 | 11 | 66.87  | b2°b2y2y3y8y9y12y13y14y<br>16y20                                                               | 2401.13 | 80.792 | 114420 | 3 | 801.05  | -0.71  |
| P17215 LIVJ_SALTY Leu/Ile/Val/Thr-<br>binding protein         | 6  |                      | VAVVGAMSGPVAQYGDQEFTGA<br>EQAIADINAK       | 25  | 32 | 23 | 131.64 | b2b3b6b7b8b12b15°b15b2<br>6y2y3*y3y5°y5y6y7y8y11y<br>12y14y25y26y32                            | 3207.58 | 90.703 | 109534 | 3 | 1069.86 | 4.72   |

|                                                         |    |                                          |                                        |     |    |    |        |                                                                                                                  |         |         |        |   |         |        |
|---------------------------------------------------------|----|------------------------------------------|----------------------------------------|-----|----|----|--------|------------------------------------------------------------------------------------------------------------------|---------|---------|--------|---|---------|--------|
| P17215 LIVJ_SALTY Leu/Ile/Val/Thr-binding protein       | 7  |                                          | GGVNVVFFDGITAGEKDFSTLVAR               | 185 | 24 | 17 | 112.71 | b4b5*b5b6*b6y1y2y3y6y7y12y13y17y18y19y21y24                                                                      | 2499.29 | 102.533 | 96743  | 3 | 833.77  | 1.47   |
| P17215 LIVJ_SALTY Leu/Ile/Val/Thr-binding protein       | 8  |                                          | GATVDTVMGPLSWDEK                       | 326 | 16 | 10 | 63.34  | b7b8b10*b10b11y3°y3y7y9y16                                                                                       | 1705.83 | 62.754  | 32650  | 2 | 853.42  | 10.66  |
| P17215 LIVJ_SALTY Leu/Ile/Val/Thr-binding protein       | 9  |                                          | QDPSGAFVWTTYAALQSLQAGLNHSDDPAEIAK      | 290 | 33 | 8  | 22.38  | b4b8b11y2y6y8y11y33                                                                                              | 3501.71 | 110.016 | 11805  | 3 | 1167.91 | 5.16   |
| P17215 LIVJ_SALTY Leu/Ile/Val/Thr-binding protein       | 10 |                                          | GFEFGVFDWHANGTATDAK                    | 346 | 19 | 6  | 23.68  | b2b5y5y7y11y19                                                                                                   | 2069.94 | 84.238  | 10109  | 3 | 690.65  | 1.65   |
| P17215 LIVJ_SALTY Leu/Ile/Val/Thr-binding protein       | 11 |                                          | QQYGEGLAR                              | 168 | 9  | 3  | 30.51  | b6y5y8                                                                                                           | 1021.50 | 33.608  | 3679   | 1 | 1021.50 | -1.25  |
| P17215 LIVJ_SALTY Leu/Ile/Val/Thr-binding protein       | 12 | Carbamidomethyl+C(6)                     | TLLAGCIALSLSHMAFADDIK                  | 4   | 21 | 4  | 37.45  | y5y6y7y12                                                                                                        | 2247.11 | 105.443 | 1904   | 2 | 1124.06 | -18.14 |
| P17215 LIVJ_SALTY Leu/Ile/Val/Thr-binding protein       | 13 |                                          | GGVNVVFFDGITAGEK                       | 185 | 16 | 4  | 24.3   | b7b10y5y8                                                                                                        | 1609.80 | 56.664  | 1679   | 2 | 805.41  | -10.92 |
| P17215 LIVJ_SALTY Leu/Ile/Val/Thr-binding protein       | 14 |                                          | KQDPSGAFVWTTYAALQSLQAGLNHSDDPAEIAK     | 289 | 34 | 39 | 299.62 | b3°b3*b3b4b5b7°b7b8b9°b9b11b12*b12b13°b13b14b15b18y3y6y7y9°y9y11y13y14°y14y15*y15y16y17y18*y18y19y20y21y22y24y25 | 3629.77 | 103.050 | 384857 | 4 | 908.20  | -3.70  |
| P17215 LIVJ_SALTY Leu/Ile/Val/Thr-binding protein       | 15 |                                          | ENIDFVYYGGYHPEMGQILRQSR                | 212 | 23 | 3  | 13.06  | b3b8y12                                                                                                          | 2772.33 | 111.870 | 3880   | 3 | 924.78  | 4.14   |
| P17215 LIVJ_SALTY Leu/Ile/Val/Thr-binding protein       | 16 | Carbamidomethyl+C(7); Phosphoryl STY(31) | YVIGHLCSSSTQPASDIYEDEGILMITPAATAPELTAR | 92  | 38 | 7  | 41.1   | b11b12y6y9y10y12y15                                                                                              | 4157.91 | 110.890 | 7843   | 5 | 832.39  | -5.40  |
| P17215 LIVJ_SALTY Leu/Ile/Val/Thr-binding protein       | 17 | Oxidation+M(15)                          | ENIDFVYYGGYHPEMGQILR                   | 212 | 20 | 3  | 14.39  | b3b10y9                                                                                                          | 2417.14 | 65.302  | 31597  | 4 | 605.04  | 7.88   |
| P17215 LIVJ_SALTY Leu/Ile/Val/Thr-binding protein       | 18 | Oxidation+M(16)                          | KENIDFVYYGGYHPEMGQILR                  | 211 | 21 | 4  | 13.89  | b3b11°b11y11                                                                                                     | 2545.20 | 70.640  | 14252  | 3 | 849.07  | -8.44  |
| P17215 LIVJ_SALTY Leu/Ile/Val/Thr-binding protein       | 19 | Oxidation+M(8)                           | GATVDTVMGPLSWDEK                       | 326 | 16 | 5  | 28.37  | b9y5y6y13°y13                                                                                                    | 1721.82 | 91.544  | 13314  | 3 | 574.61  | 7.02   |
| P17215 LIVJ_SALTY Leu/Ile/Val/Thr-binding protein       | 20 | Carbamidomethyl+C(6); Oxidation+M(14)    | TLLAGCIALSLSHMAFADDIK                  | 4   | 21 | 3  | 13.89  | b6b14y5                                                                                                          | 2263.13 | 110.320 | 1807   | 3 | 755.05  | -5.07  |
| P17215 LIVJ_SALTY Leu/Ile/Val/Thr-binding protein       | 21 | Carbamidomethyl+C(7)                     | YVIGHLCS                               | 92  | 8  | 0  | 13.31  |                                                                                                                  | 948.46  | 90.070  | 1735   | 1 | 948.46  | 3.86   |
| P17215 LIVJ_SALTY Leu/Ile/Val/Thr-binding protein       | 22 |                                          | TYAALQSLQAGLNHSDDPAEIAK                | 300 | 23 | 0  | 11.29  |                                                                                                                  | 2413.22 | 110.003 | 1529   | 3 | 805.08  | 6.78   |
| P17215 LIVJ_SALTY Leu/Ile/Val/Thr-binding protein       | 23 |                                          | QQYGEGLAR                              | 168 | 9  | 3  | 38.3   | y4y6y7                                                                                                           | 1003.49 | 33.638  | 6360   | 2 | 502.25  | -1.22  |
| P02910 HISJ_SALTY Histidine-binding periplasmic protein | 1  |                                          | NSDIQPTVASLK                           | 120 | 12 | 25 | 137.57 | b1*b1b2°b2*b2b3*b3b4*b4b5*b5b7°b7y3y4°y4y5y7y8°y8*y8y9y10*y10y12                                                 | 1272.67 | 48.839  | 134847 | 2 | 636.84  | -6.43  |
| P02910 HISJ_SALTY Histidine-binding periplasmic protein | 2  |                                          | VGVLQGTQTETFGNEHWAPK                   | 135 | 20 | 14 | 119.92 | b2b4b5y2y4y8y9y10y11y12y15y17y19y20                                                                              | 2199.07 | 64.043  | 130600 | 3 | 733.70  | -4.55  |
| P02910 HISJ_SALTY Histidine-binding periplasmic protein | 3  |                                          | IGTDPTYAPFESK                          | 29  | 13 | 22 | 165.23 | b2b3b4b7b8b13y3°y3y4°y4y5°y5y6°y6y7y9°y9y10°y10y11y12y13                                                         | 1425.69 | 56.167  | 125302 | 2 | 713.35  | 0.94   |
| P02910 HISJ_SALTY Histidine-binding periplasmic protein | 4  | Carbamidomethyl+C(5)                     | INTQCTFVENPLDALIPSLK                   | 62  | 20 | 16 | 84.77  | b2b3°b3b6b8b12b16*b16y2y3y4°y4y5y10y14y20                                                                        | 2273.22 | 104.465 | 87912  | 2 | 1137.11 | 13.53  |
| P02910 HISJ_SALTY Histidine-binding periplasmic protein | 5  |                                          | FGGPAVKDEK                             | 201 | 10 | 14 | 101.84 | b2b8°b8b9y2°y2y3y4°y4y5y6y7y8y10                                                                                 | 1047.54 | 27.178  | 50582  | 2 | 524.27  | -4.89  |
| P02910 HISJ_SALTY Histidine-binding periplasmic protein | 6  |                                          | NAQGELVGFDIDLAK                        | 42  | 15 | 7  | 29.48  | b1b6*b6b7b13y12y15                                                                                               | 1589.83 | 80.125  | 38235  | 2 | 795.42  | 5.30   |

|                                                          |    |                       |                                   |     |    |    |        |                                                                     |         |         |        |   |         |        |
|----------------------------------------------------------|----|-----------------------|-----------------------------------|-----|----|----|--------|---------------------------------------------------------------------|---------|---------|--------|---|---------|--------|
| [P02910]HISJ_SALTY Histidine-binding periplasmic protein | 7  | Carbamidomethyl+C(18) | NAQGELVGFDIDLAKELCK               | 42  | 19 | 4  | 23.68  | b3b5b12y3                                                           | 2120.06 | 87.054  | 13948  | 3 | 707.36  | -4.72  |
| [P02910]HISJ_SALTY Histidine-binding periplasmic protein | 8  |                       | LFGVGTGMGLR                       | 211 | 11 | 6  | 52.55  | b3b10°b10y5y7y9                                                     | 1107.59 | 72.944  | 57733  | 2 | 554.30  | -2.87  |
| [P02910]HISJ_SALTY Histidine-binding periplasmic protein | 9  |                       | AFAEMR                            | 234 | 6  | 2  | 13.63  | y5°y5                                                               | 724.34  | 36.757  | 6254   | 1 | 724.34  | -2.95  |
| [P02910]HISJ_SALTY Histidine-binding periplasmic protein | 10 |                       | GIEIVSYQGQDNISDLTAGR              | 155 | 21 | 3  | 13.89  | b13y3y9                                                             | 2299.15 | 80.491  | 3353   | 2 | 1150.08 | 11.47  |
| [P02910]HISJ_SALTY Histidine-binding periplasmic protein | 11 |                       | IDAAFQDEVAASEGFLKQPVGK            | 176 | 22 | 6  | 25.64  | b4°b4b13y4y18y20                                                    | 2320.18 | 78.875  | 46461  | 3 | 774.06  | -2.10  |
| [P02910]HISJ_SALTY Histidine-binding periplasmic protein | 12 |                       | RVGVLQGTQTETFGNEHWAPK             | 134 | 21 | 3  | 13.89  | b4y4y8                                                              | 2355.18 | 59.165  | 17627  | 3 | 785.73  | 0.00   |
| [P02910]HISJ_SALTY Histidine-binding periplasmic protein | 13 |                       | EALNKAF AEMR                      | 229 | 11 | 3  | 24.33  | b4y8y10                                                             | 1279.65 | 57.144  | 3943   | 2 | 640.33  | 4.01   |
| [P02910]HISJ_SALTY Histidine-binding periplasmic protein | 14 | Phosphoryl STY(7)     | IDAIMSSLSITEKR                    | 85  | 14 | 5  | 30.78  | b5b6b10y10°y10                                                      | 1643.82 | 55.580  | 2579   | 2 | 822.41  | 10.77  |
| [P02910]HISJ_SALTY Histidine-binding periplasmic protein | 15 | Oxidation+M(5)        | IDAIMSSLSITEK                     | 85  | 13 | 3  | 25.44  | b4b5y10                                                             | 1423.72 | 48.716  | 4599   | 3 | 475.25  | -8.32  |
| [P02910]HISJ_SALTY Histidine-binding periplasmic protein | 16 | Oxidation+M(8)        | LFGVGTGMGLR                       | 211 | 11 | 4  | 35.34  | b5b8y7y9                                                            | 1123.58 | 39.686  | 1962   | 2 | 562.29  | -11.08 |
| [P02910]HISJ_SALTY Histidine-binding periplasmic protein | 17 |                       | GGPAVKDEK                         | 202 | 9  | 3  | 33.93  | b3b4b7                                                              | 900.47  | 27.178  | 15362  | 2 | 450.74  | -8.54  |
| [P0A1E3]CYSK_SALTY Cysteine synthase A                   | 1  |                       | LTLTMPETMSIER                     | 87  | 13 | 18 | 135.76 | b2°b2b5°b5b9°b9b12°b12y1y4y5y6y8y9y10y11y12y13                      | 1521.77 | 74.732  | 131100 | 2 | 761.39  | 2.41   |
| [P0A1E3]CYSK_SALTY Cysteine synthase A                   | 2  |                       | YLLQQFSNPANPEIHEK                 | 137 | 18 | 25 | 203.15 | b2b3b4b9b12b15y2°y2y3y4y6y7y8y9°y9y10°y10y11y12°y12y13°y13y15y17y18 | 2141.09 | 74.686  | 124219 | 3 | 714.37  | -5.82  |
| [P0A1E3]CYSK_SALTY Cysteine synthase A                   | 3  |                       | IQGIGAGFIPGNLDLK                  | 226 | 16 | 13 | 70.25  | b2°b2b3b4b8y2y7°y7y8y10y12y14y16                                    | 1612.90 | 84.118  | 113614 | 2 | 806.95  | -1.97  |
| [P0A1E3]CYSK_SALTY Cysteine synthase A                   | 4  |                       | YLSTALFADLFTEKELQQ                | 305 | 18 | 20 | 120.76 | b2b4°b4b11b13b14°b14b16y2°y2y5y6y7°y7y8y10y11y12°y12y18             | 2117.10 | 103.005 | 102853 | 2 | 1059.05 | 9.34   |
| [P0A1E3]CYSK_SALTY Cysteine synthase A                   | 5  |                       | IYEDNSLTIGHTPLVR                  | 3   | 16 | 6  | 39.88  | b2y2y7y8y9y15                                                       | 1827.94 | 62.291  | 83092  | 3 | 609.99  | -10.55 |
| [P0A1E3]CYSK_SALTY Cysteine synthase A                   | 6  |                       | NIVVILPSSGER                      | 293 | 12 | 12 | 111.11 | b2b3b4b5b6y1y3y6y7y9y10y12                                          | 1283.73 | 64.658  | 68701  | 2 | 642.37  | -3.52  |
| [P0A1E3]CYSK_SALTY Cysteine synthase A                   | 7  |                       | GVLKPGVELVEPTSGNTGIALAYVAAAR      | 56  | 28 | 12 | 95.18  | b11y3y4y5y6y7y9y11y14y16y17y28                                      | 2753.53 | 82.107  | 67602  | 3 | 918.51  | 3.37   |
| [P0A1E3]CYSK_SALTY Cysteine synthase A                   | 8  |                       | LQEDESFTNK                        | 283 | 10 | 7  | 57.38  | b3b4y6°y6y7y8y10                                                    | 1210.56 | 35.890  | 52781  | 2 | 605.79  | 3.63   |
| [P0A1E3]CYSK_SALTY Cysteine synthase A                   | 9  |                       | ALGANLVLTEGAK                     | 105 | 13 | 6  | 20.67  | b2b5y5°y5y7y13                                                      | 1256.72 | 61.922  | 28832  | 2 | 628.86  | -2.23  |
| [P0A1E3]CYSK_SALTY Cysteine synthase A                   | 10 |                       | VVGITNEEAISTAR                    | 246 | 14 | 6  | 39.08  | b3b10y9y10°y10y12                                                   | 1459.77 | 50.187  | 25141  | 2 | 730.39  | -3.43  |
| [P0A1E3]CYSK_SALTY Cysteine synthase A                   | 11 |                       | YLSTALFADLFTEK                    | 305 | 14 | 7  | 45.47  | b11y4°y4y8y9y10y14                                                  | 1618.84 | 103.935 | 18576  | 2 | 809.92  | 1.89   |
| [P0A1E3]CYSK_SALTY Cysteine synthase A                   | 12 |                       | IGANMIWDAEK                       | 44  | 11 | 13 | 94.47  | b5°b5b6b8b9b10y1y3°y3y9y10y11°y11                                   | 1247.61 | 66.208  | 17104  | 2 | 624.31  | 2.64   |
| [P0A1E3]CYSK_SALTY Cysteine synthase A                   | 13 |                       | IGANMIWDAEKR                      | 44  | 12 | 6  | 22.3   | b2b7y7y11y12°y12                                                    | 1403.70 | 63.946  | 15244  | 2 | 702.35  | -9.13  |
| [P0A1E3]CYSK_SALTY Cysteine synthase A                   | 14 |                       | AEEIVASDPQK                       | 126 | 11 | 4  | 27.34  | b4b5y2y6                                                            | 1186.60 | 29.708  | 1841   | 2 | 593.80  | 2.67   |
| [P0A1E3]CYSK_SALTY Cysteine synthase A                   | 15 |                       | GKTDLITVAVEPTDSPVIAQALAGEEIKPGPHK | 193 | 33 | 4  | 25.83  | y5y10y11y22                                                         | 3381.80 | 80.287  | 92583  | 4 | 846.21  | -6.86  |
| [P0A1E3]CYSK_SALTY Cysteine synthase A                   | 16 |                       | LIDKVVGITNEEAISTAR                | 242 | 18 | 4  | 24.85  | b8y5y7y12                                                           | 1929.08 | 60.316  | 34740  | 2 | 965.04  | 5.38   |

|                                              |    |  |                              |     |    |    |        |                                                                                    |         |         |        |   |        |        |
|----------------------------------------------|----|--|------------------------------|-----|----|----|--------|------------------------------------------------------------------------------------|---------|---------|--------|---|--------|--------|
| [P0A1E3]CYSK_SALTY Cysteine synthase A       | 17 |  | VESRNPSFSVK                  | 31  | 11 | 3  | 24.33  | b3b7y9                                                                             | 1249.66 | 31.747  | 30869  | 3 | 417.22 | 4.49   |
| [P0A1E3]CYSK_SALTY Cysteine synthase A       | 18 |  | AEEIVASDPQKYLLQQFSNPANPEIHEK | 126 | 29 | 5  | 14.54  | b3b5°b5y6y9                                                                        | 3308.67 | 77.846  | 25929  | 4 | 827.92 | -3.98  |
| [P0A1E3]CYSK_SALTY Cysteine synthase A       | 19 |  | LQEDESFTNKNIVILPSSGER        | 283 | 22 | 3  | 13.45  | b4b10y6                                                                            | 2475.28 | 70.247  | 8961   | 3 | 825.76 | 1.87   |
| [P0A1E3]CYSK_SALTY Cysteine synthase A       | 20 |  | LLQQFSNPANPEIHEK             | 138 | 17 | 1  | 7.33   | b11                                                                                | 1978.03 | 74.682  | 8576   | 2 | 989.52 | -3.21  |
| [P0A1E3]CYSK_SALTY Cysteine synthase A       | 21 |  | IVASDPQK                     | 129 | 8  | 1  | 7.87   | b7                                                                                 | 857.48  | 29.656  | 3133   | 2 | 429.24 | 9.18   |
| [P0A1E3]CYSK_SALTY Cysteine synthase A       | 22 |  | GITNEEAISTAR                 | 248 | 12 | 0  | 3.63   |                                                                                    | 1261.63 | 50.193  | 2066   | 2 | 631.32 | -6.19  |
| [P41031]CY_SALTY Thiosulfate-binding protein | 1  |  | AYLNWLYSPQAQTIIHYYR          | 265 | 21 | 31 | 237.73 | b2b3b4*b4b5*b5b6*b6b8b9b10y2y3y4y6°y6y7y8°y8y9y10°y10*y10y11y13y14y15y16y17y21*y21 | 2664.33 | 93.825  | 129277 | 3 | 888.78 | 0.55   |
| [P41031]CY_SALTY Thiosulfate-binding protein | 2  |  | TEQFMTQFLK                   | 179 | 10 | 11 | 87.64  | b2b3y2y3y4*y4y5y6y7y8y10                                                           | 1272.62 | 76.176  | 122516 | 2 | 636.82 | -4.51  |
| [P41031]CY_SALTY Thiosulfate-binding protein | 3  |  | ELFAALNPPFEQQWAK             | 37  | 16 | 16 | 86.49  | b2°b2b5b7*b7b13y1y4*y4y6*y6y8y9y10°y10y12                                          | 1888.97 | 90.590  | 118976 | 2 | 944.99 | 4.72   |
| [P41031]CY_SALTY Thiosulfate-binding protein | 4  |  | GLGDVLISFESEVNNIRK           | 208 | 18 | 19 | 133.9  | b2b4b5°b5b12b16y2y5y6y8y9y10*y10y11y12*y12y13y16y18                                | 1990.04 | 101.834 | 106937 | 3 | 664.02 | -10.80 |
| [P41031]CY_SALTY Thiosulfate-binding protein | 5  |  | FGSWPEVMK                    | 311 | 9  | 8  | 64.76  | b2b3y2y3y5y6y8y9                                                                   | 1080.51 | 69.350  | 97798  | 2 | 540.76 | -7.91  |
| [P41031]CY_SALTY Thiosulfate-binding protein | 6  |  | LPNNSSPFYSTMGFLVR            | 110 | 17 | 22 | 153.5  | b2b4b5°b5*b5b6°b6*b6b7b17y1y2y3y4y5y8y9y11y12y13y14y17                             | 1929.96 | 92.701  | 95305  | 2 | 965.49 | 5.88   |
| [P41031]CY_SALTY Thiosulfate-binding protein | 7  |  | VNNPEIMGK                    | 286 | 9  | 16 | 89.46  | b1b2*b2b4b7y2y3y5y6°y6y7°y7*y7y8*y8y9                                              | 1001.50 | 36.870  | 74959  | 2 | 501.25 | -6.40  |
| [P41031]CY_SALTY Thiosulfate-binding protein | 8  |  | QYEAQGFEVVIPK                | 226 | 13 | 14 | 76.6   | b2*b2b3°b3*b3b7b13y2y3y5y8y9y11y13                                                 | 1507.78 | 70.597  | 71974  | 2 | 754.39 | -0.65  |
| [P41031]CY_SALTY Thiosulfate-binding protein | 9  |  | NVEVFDTGGR                   | 189 | 10 | 16 | 86.85  | b1*b1b2*b2b4*b4b8y1y4y5y6y7°y7y8°y8y10                                             | 1093.52 | 47.813  | 65617  | 2 | 547.26 | -5.92  |
| [P41031]CY_SALTY Thiosulfate-binding protein | 10 |  | QALAILQLK                    | 71  | 10 | 7  | 58.17  | b3*b3b10y3y5y6y7                                                                   | 1054.65 | 75.640  | 64960  | 2 | 527.83 | -9.72  |
| [P41031]CY_SALTY Thiosulfate-binding protein | 11 |  | NIHDWSDLVR                   | 132 | 10 | 6  | 54.94  | y2y3y4y6y8y10                                                                      | 1254.62 | 63.508  | 52057  | 2 | 627.81 | -3.31  |
| [P41031]CY_SALTY Thiosulfate-binding protein | 12 |  | GLGDVLISFESEVNNIR            | 208 | 17 | 6  | 27.43  | b10y2y9y10y12y17                                                                   | 1861.97 | 107.866 | 29618  | 2 | 931.49 | 3.67   |
| [P41031]CY_SALTY Thiosulfate-binding protein | 13 |  | ADVVTYNQVTDVQILHDK           | 81  | 18 | 9  | 32.79  | b1b2b3b10*b10y3y4y14y18                                                            | 2058.03 | 64.540  | 13489  | 3 | 686.68 | -7.47  |
| [P41031]CY_SALTY Thiosulfate-binding protein | 14 |  | LPNNSSPFYSTMGFLVRK           | 110 | 18 | 7  | 26.61  | b7°b7b12b13*b13y11y18                                                              | 2058.03 | 83.907  | 3208   | 3 | 686.68 | -8.42  |
| [P41031]CY_SALTY Thiosulfate-binding protein | 15 |  | TNLAEFPAWVDK                 | 239 | 14 | 3  | 24.75  | b7y4y5                                                                             | 1602.84 | 70.224  | 1755   | 2 | 801.92 | -7.39  |
| [P41031]CY_SALTY Thiosulfate-binding protein | 16 |  | LIFPNPK                      | 146 | 7  | 4  | 40.5   | y3*y3y5y6                                                                          | 828.48  | 56.461  | 61073  | 2 | 414.75 | -15.69 |
| [P41031]CY_SALTY Thiosulfate-binding protein | 17 |  | TNLAEFPAWVDKNVQANGTEK        | 239 | 23 | 13 | 104.11 | b3°b3b4b5y6y7*y7y9y13y16y17y19y20                                                  | 2544.30 | 91.216  | 139285 | 3 | 848.77 | -2.78  |
| [P41031]CY_SALTY Thiosulfate-binding protein | 18 |  | YTYLAAWGAADNADGGDKAK         | 159 | 20 | 5  | 32.03  | y3y6y9y18°y18                                                                      | 2057.95 | 62.861  | 67143  | 3 | 686.65 | -5.22  |
| [P41031]CY_SALTY Thiosulfate-binding protein | 19 |  | TSGNARYTYLAAWGAADNADGGDK     | 153 | 24 | 5  | 19.47  | b7b13*b13b15y6                                                                     | 2445.13 | 94.437  | 9092   | 4 | 612.04 | 10.48  |

|                                             |    |                    |                                |     |    |    |        |                                                                                            |         |         |        |   |         |        |
|---------------------------------------------|----|--------------------|--------------------------------|-----|----|----|--------|--------------------------------------------------------------------------------------------|---------|---------|--------|---|---------|--------|
| P41031 CY_SALTY Thiosulfate-binding protein | 20 |                    | NVEVFDTGGRGATTTFAER            | 189 | 19 | 5  | 39.46  | b5b6y3y4y9                                                                                 | 2027.97 | 57.233  | 6485   | 3 | 676.66  | -5.24  |
| P41031 CY_SALTY Thiosulfate-binding protein | 21 |                    | AYLNWLYSPQAQTIIHHYYRVN NPEIMGK | 265 | 30 | 6  | 35.39  | b5b6y7y8°y8y11                                                                             | 3646.81 | 85.195  | 4984   | 5 | 730.17  | -2.01  |
| P41031 CY_SALTY Thiosulfate-binding protein | 22 |                    | VEEKFGSWPEVMK                  | 307 | 13 | 4  | 34.11  | b4b6b10y7                                                                                  | 1565.75 | 51.792  | 4696   | 2 | 783.38  | -9.36  |
| P41031 CY_SALTY Thiosulfate-binding protein | 23 |                    | TEQFMTQFLKNVEVFDTGGR           | 179 | 20 | 4  | 36.07  | b10y7y8y9                                                                                  | 2347.11 | 112.464 | 2982   | 3 | 783.04  | -13.00 |
| P41031 CY_SALTY Thiosulfate-binding protein | 24 | Phosphoryl STY(13) | AYLNWLYSPQAQTIIHHYYR           | 265 | 21 | 5  | 29.8   | b3b7y4y8y9                                                                                 | 2744.29 | 81.973  | 5444   | 2 | 1372.65 | 4.80   |
| P41031 CY_SALTY Thiosulfate-binding protein | 25 | Oxidation+M(12)    | LPNNSSPFYSTMGFLVR              | 110 | 17 | 6  | 29.95  | b3b8y10°y10y11°y11                                                                         | 1945.95 | 115.109 | 3852   | 2 | 973.48  | 3.45   |
| P41031 CY_SALTY Thiosulfate-binding protein | 26 |                    | EVFDTGGR                       | 191 | 8  | 0  | 2.02   |                                                                                            | 880.42  | 47.811  | 1935   | 1 | 880.42  | -0.42  |
| P41031 CY_SALTY Thiosulfate-binding protein | 27 |                    | QALAILQLK                      | 71  | 10 | 0  | 2.02   |                                                                                            | 1037.63 | 75.632  | 2652   | 2 | 519.32  | 1.06   |
| P52616 FLJB_SALTY Phase 2 flagellin         | 1  |                    | AQILQQAGTSVLAQANQPQNVLSLLR     | 479 | 27 | 33 | 190.55 | b2°b2b3°b3b4°b4b5°b5b6°b6b7b10°b10b11°b11b15°b15b16b18°b18y1y2y4y5y6y7°y7y9y10y11y12y14y27 | 2860.60 | 105.978 | 105579 | 3 | 954.21  | 0.85   |
| P52616 FLJB_SALTY Phase 2 flagellin         | 2  |                    | SQSALGTAIER                    | 20  | 11 | 13 | 82.03  | b2°b2°b2b3b5y4y5y6y7°y7y9°y9y11                                                            | 1132.59 | 42.657  | 64826  | 2 | 566.80  | -3.02  |
| P52616 FLJB_SALTY Phase 2 flagellin         | 3  |                    | YFVTIGGFTGADAAK                | 234 | 15 | 7  | 37.87  | b8b9°b9y1y6y7y15                                                                           | 1517.77 | 74.150  | 51085  | 2 | 759.39  | 2.33   |
| P52616 FLJB_SALTY Phase 2 flagellin         | 4  |                    | INSAKDDAAGQAIANR               | 37  | 16 | 18 | 120.61 | b2°b2b6°b6°b6b10b11y1y3°y3y4y5y7y8y9y10y11y16                                              | 1614.80 | 30.836  | 45939  | 3 | 538.94  | -12.62 |
| P52616 FLJB_SALTY Phase 2 flagellin         | 5  |                    | NANDGISIAQTTEGALNEINNLR        | 66  | 25 | 11 | 22.77  | b2b13b16°b16y2y3y6°y6y9°y9y25                                                              | 2670.34 | 87.465  | 39100  | 2 | 1335.67 | 10.61  |
| P52616 FLJB_SALTY Phase 2 flagellin         | 6  |                    | AQVINTNSLSLLTQNNLNK            | 1   | 19 | 7  | 14.96  | b7°b7b9y7°y7°y7y19                                                                         | 2085.15 | 63.253  | 23058  | 3 | 695.72  | 8.31   |
| P52616 FLJB_SALTY Phase 2 flagellin         | 7  |                    | ELAVQSANSTNSQSDLSIQAEITQR      | 93  | 26 | 8  | 21.97  | b8°b8b10y3°y3y7y9y26                                                                       | 2805.35 | 71.327  | 19384  | 3 | 935.79  | -0.17  |
| P52616 FLJB_SALTY Phase 2 flagellin         | 8  |                    | AYANNGTTLDVSLDDAAIK            | 189 | 20 | 6  | 21.18  | b2y6y12°y12y14y20                                                                          | 2008.95 | 74.192  | 19365  | 3 | 670.32  | -14.40 |
| P52616 FLJB_SALTY Phase 2 flagellin         | 9  |                    | DDAAGQAIANR                    | 42  | 11 | 6  | 38.35  | b2b4b9y7y8y11                                                                              | 1101.52 | 28.900  | 13864  | 2 | 551.27  | -4.10  |
| P52616 FLJB_SALTY Phase 2 flagellin         | 10 |                    | IEDSDYATEVSNMSR                | 464 | 15 | 4  | 36.75  | y5y6y10y13                                                                                 | 1716.76 | 54.035  | 12003  | 2 | 858.88  | 13.79  |
| P52616 FLJB_SALTY Phase 2 flagellin         | 11 |                    | FTANIK                         | 53  | 6  | 2  | 26.87  | b4y5                                                                                       | 693.38  | 34.642  | 15603  | 2 | 347.20  | -11.80 |
| P52616 FLJB_SALTY Phase 2 flagellin         | 12 |                    | NALIAGGVDATDANGAELVK           | 299 | 20 | 5  | 25.28  | b13°b13y9y10y13                                                                            | 1898.94 | 86.707  | 5579   | 2 | 949.98  | -20.44 |
| P52616 FLJB_SALTY Phase 2 flagellin         | 13 |                    | TAANQLGGVDGK                   | 369 | 12 | 3  | 22.3   | b5y5y9                                                                                     | 1130.57 | 60.955  | 5085   | 1 | 1130.57 | -6.91  |
| P52616 FLJB_SALTY Phase 2 flagellin         | 14 |                    | AQPELAEEAAK                    | 403 | 11 | 3  | 27.34  | b8y9y10                                                                                    | 1098.56 | 88.477  | 4704   | 2 | 549.78  | -18.78 |
| P52616 FLJB_SALTY Phase 2 flagellin         | 15 |                    | TYNASK                         | 390 | 6  | 3  | 40.1   | b3b4y5                                                                                     | 683.33  | 72.231  | 3268   | 1 | 683.33  | -9.20  |
| P52616 FLJB_SALTY Phase 2 flagellin         | 16 |                    | FNSAITNLGNTVNNLSEAR            | 443 | 19 | 4  | 14.96  | b3b12°b12y9                                                                                | 2035.03 | 75.499  | 1986   | 2 | 1018.02 | 2.76   |
| P52616 FLJB_SALTY Phase 2 flagellin         | 17 |                    | LNEIDR                         | 119 | 6  | 2  | 26.87  | b4y4                                                                                       | 759.39  | 28.852  | 1958   | 2 | 380.20  | -6.11  |
| P52616 FLJB_SALTY Phase 2 flagellin         | 18 |                    | YYAADYDEATGAIK                 | 341 | 14 | 3  | 19.31  | b4b10y9                                                                                    | 1550.71 | 51.272  | 1628   | 3 | 517.57  | 3.46   |
| P52616 FLJB_SALTY Phase 2 flagellin         | 19 |                    | SRIEDSDYATEVSNMSR              | 462 | 17 | 8  | 68.89  | b8b11b12y3y4y7y8y10                                                                        | 1959.89 | 51.452  | 22657  | 2 | 980.45  | 10.71  |

|                                                               |    |  |                                     |     |    |    |        |                                                             |         |         |       |   |         |        |
|---------------------------------------------------------------|----|--|-------------------------------------|-----|----|----|--------|-------------------------------------------------------------|---------|---------|-------|---|---------|--------|
| P52616 FLJB_SALTY Phase 2 flagellin                           | 20 |  | NALIAGGVDATDANGAELVKMSY<br>TDK      | 299 | 26 | 6  | 25.6   | b13b14y4°y4y12°y12                                          | 2624.31 | 77.043  | 20006 | 3 | 875.44  | 8.37   |
| P52616 FLJB_SALTY Phase 2 flagellin                           | 21 |  | TEVVTIDGKTYNASK                     | 381 | 15 | 3  | 18.16  | b3b11y9                                                     | 1625.84 | 58.566  | 14399 | 3 | 542.62  | -1.28  |
| P52616 FLJB_SALTY Phase 2 flagellin                           | 22 |  | TYNASKAAGHDFK                       | 390 | 13 | 6  | 54.62  | b4b9b10b12y6y9                                              | 1409.66 | 47.373  | 12821 | 2 | 705.34  | -12.30 |
| P52616 FLJB_SALTY Phase 2 flagellin                           | 23 |  | TAANQLGGVDGKTEVVTIDGK               | 369 | 21 | 6  | 20.53  | b11b14°b14*b14b17*b17                                       | 2073.10 | 90.739  | 4261  | 3 | 691.70  | 8.24   |
| P52616 FLJB_SALTY Phase 2 flagellin                           | 24 |  | TEVQELKDTPAVVSADAK                  | 281 | 18 | 4  | 21.78  | b8b10y3y6                                                   | 1900.99 | 94.509  | 3584  | 2 | 951.00  | 2.44   |
| P52616 FLJB_SALTY Phase 2 flagellin                           | 25 |  | LNEIDRVSGQTQFNGVK                   | 119 | 17 | 5  | 16.34  | b6*b6b9y10*y10                                              | 1904.97 | 86.276  | 2376  | 2 | 952.99  | -4.87  |
| P52616 FLJB_SALTY Phase 2 flagellin                           | 26 |  | TTSYTAADGTTKTAANQLGGVD<br>GK        | 357 | 24 | 8  | 36.89  | b7b10b13b14b16°b16*b16<br>y5                                | 2328.15 | 80.034  | 2137  | 3 | 776.72  | 6.08   |
| P52616 FLJB_SALTY Phase 2 flagellin                           | 27 |  | AKTTSYTAADGTTK                      | 355 | 14 | 3  | 19.31  | b8b13y8                                                     | 1415.69 | 88.209  | 2049  | 2 | 708.35  | -7.67  |
| P52616 FLJB_SALTY Phase 2 flagellin                           | 28 |  | AQPELAEAAAKTENPLQK                  | 403 | 19 | 4  | 36.32  | b12y7y8y9                                                   | 2010.03 | 64.535  | 1693  | 2 | 1005.52 | -9.96  |
| P52616 FLJB_SALTY Phase 2 flagellin                           | 29 |  | DTPAVVSADAKNALIAGGVDATD<br>ANGAELVK | 288 | 31 | 3  | 11.26  | b8y7y12                                                     | 2953.55 | 86.916  | 1633  | 3 | 985.19  | 13.23  |
| P23905 DGAL_SALTY D-galactose-<br>binding periplasmic protein | 1  |  | SGAMAGTVLNDANNQAK                   | 269 | 17 | 20 | 118.81 | b2b3b4b8°b8b9b16b17y1y<br>3y5y8y9°y9*y9y10y12°y12<br>y13y17 | 1661.80 | 46.928  | 85794 | 2 | 831.40  | 4.55   |
| P23905 DGAL_SALTY D-galactose-<br>binding periplasmic protein | 2  |  | SSIPVFGVDALPEALALVK                 | 250 | 19 | 17 | 141.67 | b6°b6b7b10°b10y2y3y4y5y<br>6y8y9y11y13y14y16y19             | 1926.10 | 108.448 | 84397 | 2 | 963.55  | 2.73   |
| P23905 DGAL_SALTY D-galactose-<br>binding periplasmic protein | 3  |  | VPYVGVDKDNLSEFTQK                   | 315 | 17 | 12 | 88.73  | b3b13y2y5y6y8y9*y9y10y<br>13y14y17                          | 1938.97 | 62.230  | 69794 | 3 | 646.99  | -7.81  |
| P23905 DGAL_SALTY D-galactose-<br>binding periplasmic protein | 4  |  | ALAINLVDPAAGTVIEK                   | 84  | 18 | 12 | 67.45  | b2b3b4b5*b5b6y2°y2y10y<br>11y14y18                          | 1766.01 | 81.284  | 65877 | 2 | 883.51  | 3.39   |
| P23905 DGAL_SALTY D-galactose-<br>binding periplasmic protein | 5  |  | GQNVPPVFFNKEPSR                     | 104 | 15 | 6  | 25.83  | b4b13y1y6y11*y11                                            | 1717.88 | 57.987  | 16040 | 3 | 573.30  | -12.93 |
| P23905 DGAL_SALTY D-galactose-<br>binding periplasmic protein | 6  |  | HWQANQGWDLNKDGK                     | 148 | 15 | 5  | 25.83  | b2b4b7y7y10                                                 | 1796.83 | 47.428  | 7823  | 3 | 599.61  | -10.87 |
| P23905 DGAL_SALTY D-galactose-<br>binding periplasmic protein | 7  |  | SAPDVQLLMNDSQNDQSK                  | 52  | 18 | 5  | 36.58  | b5b6°b6y6y7                                                 | 1989.94 | 62.091  | 2763  | 2 | 995.48  | 12.94  |
| P23905 DGAL_SALTY D-galactose-<br>binding periplasmic protein | 8  |  | GIQTEQLALDTAMWDTAQAK                | 192 | 20 | 5  | 32.25  | b3b4b10b13y8                                                | 2191.04 | 82.953  | 2093  | 3 | 731.02  | -13.48 |
| P23905 DGAL_SALTY D-galactose-<br>binding periplasmic protein | 9  |  | QNDQIDVLLAK                         | 70  | 11 | 3  | 24.33  | b7y6y10                                                     | 1256.71 | 54.484  | 4235  | 2 | 628.86  | 20.30  |
| P23905 DGAL_SALTY D-galactose-<br>binding periplasmic protein | 10 |  | AYYVGTDISK                          | 127 | 9  | 5  | 45.51  | b5b6°b6b7y5                                                 | 1003.49 | 100.701 | 1773  | 1 | 1003.49 | 13.75  |
| P23905 DGAL_SALTY D-galactose-<br>binding periplasmic protein | 11 |  | SAPDVQLLMNDSQNDQSKQNDQI<br>DVLLAK   | 52  | 29 | 4  | 16.93  | b3y5y21y27                                                  | 3227.61 | 78.877  | 29284 | 3 | 1076.54 | 7.94   |
| P23905 DGAL_SALTY D-galactose-<br>binding periplasmic protein | 12 |  | GQNVPPVFFNKEPSR                     | 104 | 15 | 6  | 37.14  | b4*b4b9y6y8y11                                              | 1717.88 | 62.069  | 9185  | 3 | 573.30  | -10.87 |
| P23905 DGAL_SALTY D-galactose-<br>binding periplasmic protein | 13 |  | ELNDKGIQTEQLALDTAMWDTAQ<br>AK       | 187 | 25 | 7  | 56.32  | b12y3y6y8y9y10y11                                           | 2790.35 | 80.785  | 9179  | 3 | 930.79  | -2.80  |



|                                                            |    |                      |                                            |     |    |    |        |                                                                                                            |         |         |        |   |         |        |
|------------------------------------------------------------|----|----------------------|--------------------------------------------|-----|----|----|--------|------------------------------------------------------------------------------------------------------------|---------|---------|--------|---|---------|--------|
| P23905 DGAL_SALTY D-galactose-binding periplasmic protein  | 14 |                      | DGKSAPDVQLLMNDSQNDQSK                      | 49  | 21 | 3  | 13.89  | b9b13y12                                                                                                   | 2290.09 | 75.226  | 5713   | 3 | 764.03  | 10.77  |
| P23905 DGAL_SALTY D-galactose-binding periplasmic protein  | 15 |                      | ESGVIQGDLIAKHWQANQGWDL<br>NK               | 136 | 24 | 5  | 26.19  | b8b9y9y11°y11                                                                                              | 2707.35 | 93.389  | 2936   | 3 | 903.12  | -2.80  |
| P23905 DGAL_SALTY D-galactose-binding periplasmic protein  | 16 |                      | DKMDAWLSGPNANK                             | 212 | 14 | 3  | 19.31  | b10y6y9                                                                                                    | 1546.73 | 136.593 | 1981   | 1 | 1546.73 | -2.68  |
| P23905 DGAL_SALTY D-galactose-binding periplasmic protein  | 17 | Phosphoryl STY(7)    | SGAMAGTVLNDANNQAK                          | 269 | 17 | 4  | 16.34  | b6y9°y9y15                                                                                                 | 1741.77 | 91.395  | 2048   | 3 | 581.26  | 13.60  |
| P06202 OPPA_SALTY Periplasmic oligopeptide-binding protein | 1  |                      | LADPNTASPYASYLQYGHIANIDD<br>IIAGKKPATDLGVK | 125 | 38 | 34 | 170.49 | b2b3b5*b5b6°b6*b6b7°b7<br>*b7b8°b8*b8b9°b9b10°b10<br>b11b13b20y1y2y3y4y8y9y<br>12y19y23y27y30y31y35y3<br>8 | 4001.02 | 83.834  | 218116 | 5 | 801.01  | -12.08 |
| P06202 OPPA_SALTY Periplasmic oligopeptide-binding protein | 2  |                      | AEQQLDKDSAIVPVYYYVNAR                      | 494 | 21 | 18 | 122.94 | b4b5b7°b7b8b11b12b13y3<br>*y3y4y5*y5y7y9*y9y10y2<br>1                                                      | 2442.23 | 73.686  | 123540 | 3 | 814.75  | 0.30   |
| P06202 OPPA_SALTY Periplasmic oligopeptide-binding protein | 3  | Carbamidomethyl+C(4) | AGWCADYNEPTSFLNTMLSDSSN<br>NTAHYK          | 439 | 29 | 7  | 33.93  | y2y3y15y20y22y4y29                                                                                         | 3294.43 | 90.849  | 107802 | 3 | 1098.82 | 6.37   |
| P06202 OPPA_SALTY Periplasmic oligopeptide-binding protein | 4  |                      | WSDGTPVTAHDFVYSWQR                         | 107 | 18 | 19 | 168.79 | b2y1y3y4y5y6y7y8°y8y9*y<br>9y10y11y13°y13y15y17y18<br>*y18                                                 | 2151.98 | 72.932  | 98454  | 3 | 718.00  | -2.72  |
| P06202 OPPA_SALTY Periplasmic oligopeptide-binding protein | 5  |                      | ALDDHTFEVTLSEPVPYFYK                       | 163 | 20 | 11 | 71.99  | b5b11b13y2y4y5y7y9°y9y1<br>0y11                                                                            | 2371.16 | 86.734  | 85805  | 3 | 791.06  | 3.09   |
| P06202 OPPA_SALTY Periplasmic oligopeptide-binding protein | 6  |                      | LVEPEWFK                                   | 352 | 8  | 9  | 62.59  | b1b5y2y3y5y6°y6y7y8                                                                                        | 1047.54 | 71.759  | 84747  | 2 | 524.27  | -8.39  |
| P06202 OPPA_SALTY Periplasmic oligopeptide-binding protein | 7  |                      | TVINQVTYLPISSEVTDVNR                       | 241 | 20 | 20 | 163.31 | b2b5b8°b8b9b12y3y4y5y6<br>y7y8°y8y9y11y12°y12y13y<br>14y20                                                 | 2248.20 | 77.891  | 83767  | 2 | 1124.60 | 8.14   |
| P06202 OPPA_SALTY Periplasmic oligopeptide-binding protein | 8  |                      | NLGVNVNLENQEWK                             | 410 | 14 | 7  | 44.79  | b1y7°y7y8y11y12y14                                                                                         | 1656.84 | 67.489  | 63838  | 2 | 828.92  | 4.49   |
| P06202 OPPA_SALTY Periplasmic oligopeptide-binding protein | 9  |                      | SGEIDMTYNNMPIELFQK                         | 263 | 18 | 10 | 31.03  | b2b3b13y1y2y3y5y11°y11y<br>18                                                                              | 2130.01 | 87.366  | 56816  | 2 | 1065.51 | 11.23  |
| P06202 OPPA_SALTY Periplasmic oligopeptide-binding protein | 10 |                      | NQGDLPAYSYTPPYTDGAK                        | 333 | 19 | 12 | 57.6   | b5b7°b7b10b11y2y8°y8y9y<br>11y14y19                                                                        | 2057.97 | 59.983  | 56290  | 2 | 1029.49 | 11.03  |
| P06202 OPPA_SALTY Periplasmic oligopeptide-binding protein | 11 |                      | LADPNTASPYASYLQYGHIANIDD<br>IIAGK          | 125 | 29 | 9  | 25.31  | b1b2b3b6b9y4y10y14y29                                                                                      | 3091.56 | 89.032  | 38958  | 3 | 1031.19 | 7.11   |
| P06202 OPPA_SALTY Periplasmic oligopeptide-binding protein | 12 |                      | NPQYWDNAK                                  | 232 | 9  | 8  | 45.51  | b2b3y1y3*y3y6y7y9                                                                                          | 1135.52 | 40.198  | 37537  | 2 | 568.26  | -0.32  |
| P06202 OPPA_SALTY Periplasmic oligopeptide-binding protein | 13 |                      | DLFEGLLISDVEGHPSPGVAEK                     | 67  | 22 | 4  | 29.78  | y6y8y12y14                                                                                                 | 2309.16 | 89.923  | 21906  | 3 | 770.39  | -4.55  |
| P06202 OPPA_SALTY Periplasmic oligopeptide-binding protein | 14 |                      | LIADTLK                                    | 474 | 7  | 5  | 40.5   | b5y3y5°y5y7                                                                                                | 773.47  | 44.045  | 19933  | 2 | 387.24  | -13.10 |
| P06202 OPPA_SALTY Periplasmic oligopeptide-binding protein | 15 |                      | TFLDTR                                     | 424 | 6  | 1  | 13.63  | y4                                                                                                         | 752.38  | 44.283  | 13052  | 1 | 752.38  | -13.47 |

|                                                            |    |                       |                                   |     |    |    |        |                                                                   |         |         |       |   |         |        |
|------------------------------------------------------------|----|-----------------------|-----------------------------------|-----|----|----|--------|-------------------------------------------------------------------|---------|---------|-------|---|---------|--------|
| P06202 OPPA_SALTY Periplasmic oligopeptide-binding protein | 16 |                       | DPLDNIYVK                         | 527 | 9  | 3  | 30.51  | b4b8y3                                                            | 1076.57 | 70.717  | 9593  | 2 | 538.79  | 2.61   |
| P06202 OPPA_SALTY Periplasmic oligopeptide-binding protein | 17 |                       | VWTFHLR                           | 96  | 7  | 4  | 40.5   | y4y5y6°y6                                                         | 958.52  | 66.162  | 9152  | 2 | 479.76  | -6.24  |
| P06202 OPPA_SALTY Periplasmic oligopeptide-binding protein | 18 | Carbamidomethyl+C(6)  | VDPYLCTYYYEINNQK                  | 291 | 16 | 3  | 25.56  | y6y8y9                                                            | 2082.98 | 71.613  | 7551  | 2 | 1042.00 | 17.58  |
| P06202 OPPA_SALTY Periplasmic oligopeptide-binding protein | 19 |                       | FGDK                              | 200 | 4  | 1  | 12.83  | b3                                                                | 466.23  | 34.084  | 4313  | 1 | 466.23  | 7.92   |
| P06202 OPPA_SALTY Periplasmic oligopeptide-binding protein | 20 |                       | IEGVPESNVSR                       | 56  | 11 | 4  | 24.33  | b4°b4b7y4                                                         | 1186.63 | 73.437  | 2012  | 1 | 1186.63 | 18.72  |
| P06202 OPPA_SALTY Periplasmic oligopeptide-binding protein | 21 |                       | NNGSEVQSLDPHKIEGVPESNVSR          | 43  | 24 | 13 | 105.43 | b5°b5*b5y3y5y6y7y10y11y12y14y18y22                                | 2592.24 | 51.818  | 78654 | 4 | 648.81  | -11.40 |
| P06202 OPPA_SALTY Periplasmic oligopeptide-binding protein | 22 | Carbamidomethyl+C(13) | EIPNEVRVDPYLCTYYYEINNQK           | 284 | 23 | 7  | 42.52  | b4b15y4y7y8y11y21                                                 | 2920.40 | 76.936  | 40830 | 3 | 974.14  | 5.10   |
| P06202 OPPA_SALTY Periplasmic oligopeptide-binding protein | 23 |                       | SPAFDKLIADTLK                     | 468 | 13 | 3  | 28.15  | b4b5b11                                                           | 1418.79 | 78.374  | 38470 | 2 | 709.90  | -2.15  |
| P06202 OPPA_SALTY Periplasmic oligopeptide-binding protein | 24 |                       | TVINQVTYLPISSEVTDVNRYS            | 241 | 22 | 4  | 29.4   | y10y13y19y20                                                      | 2567.35 | 77.741  | 16845 | 3 | 856.45  | -0.48  |
| P06202 OPPA_SALTY Periplasmic oligopeptide-binding protein | 25 |                       | NQGDLPAYSYTPPYTDGAKLVEP<br>EWFK   | 333 | 27 | 5  | 15.35  | b7*b7b9y4y6                                                       | 3086.50 | 92.212  | 7371  | 3 | 1029.51 | 8.54   |
| P06202 OPPA_SALTY Periplasmic oligopeptide-binding protein | 26 |                       | DLFEGLLISDVEGHPSPGVAEKWE<br>NK    | 67  | 26 | 4  | 18.31  | b3b5b13y6                                                         | 2866.45 | 100.343 | 5620  | 3 | 956.15  | 7.75   |
| P06202 OPPA_SALTY Periplasmic oligopeptide-binding protein | 27 |                       | VKNQGDLPAYSYPYTDGAK               | 331 | 21 | 3  | 22.34  | b6y7y8                                                            | 2285.09 | 97.694  | 3377  | 2 | 1143.05 | -9.08  |
| P06202 OPPA_SALTY Periplasmic oligopeptide-binding protein | 28 |                       | LVEPEWFKWSQQK                     | 352 | 13 | 5  | 34.11  | b6°b6y5y8y10                                                      | 1704.85 | 67.687  | 3117  | 3 | 568.95  | -14.32 |
| P06202 OPPA_SALTY Periplasmic oligopeptide-binding protein | 29 |                       | FGDKWTQPANIVTNGAYK                | 200 | 18 | 5  | 23     | b5y5*y5y6°y6                                                      | 2010.00 | 67.619  | 2674  | 2 | 1005.50 | -3.16  |
| P06202 OPPA_SALTY Periplasmic oligopeptide-binding protein | 30 |                       | LADPNTASPYASYLQYGHIANIDD<br>IIAGK | 125 | 29 | 2  | 12.81  | y4y7                                                              | 3091.57 | 83.861  | 2983  | 4 | 773.65  | 9.16   |
| O54297 RS4_SALTY 30S ribosomal protein S4                  | 1  |                       | VVNIASYQVSPNDVVSIR                | 128 | 18 | 25 | 209.39 | b2b3b8b9b10b14b15°b15b17b18y1y2y3y4y5y7y8y9y10y11y12y13y14°y14y18 | 1960.07 | 72.942  | 66507 | 2 | 980.54  | 9.09   |
| O54297 RS4_SALTY 30S ribosomal protein S4                  | 2  |                       | AALELAEQR                         | 156 | 9  | 11 | 74.98  | b3y2y3y4y5*y5y6°y6*y6y7y9                                         | 1000.53 | 43.937  | 56710 | 2 | 500.77  | -8.85  |
| O54297 RS4_SALTY 30S ribosomal protein S4                  | 3  |                       | SDLSADINEHLVLYSK                  | 188 | 18 | 3  | 22.76  | b4b7b15                                                           | 2046.05 | 99.484  | 3988  | 2 | 1023.53 | 6.56   |
| O54297 RS4_SALTY 30S ribosomal protein S4                  | 4  |                       | IEQAPGQHGAR                       | 33  | 11 | 3  | 27.34  | b6y6y7                                                            | 1163.57 | 16.474  | 2246  | 3 | 388.53  | -21.40 |
| O54297 RS4_SALTY 30S ribosomal protein S4                  | 5  |                       | LDNVVYRMGFGATR                    | 97  | 14 | 5  | 19.31  | b6°b6*b6y6y13                                                     | 1598.83 | 75.579  | 35415 | 3 | 533.61  | 11.76  |
| O54297 RS4_SALTY 30S ribosomal protein S4                  | 6  |                       | EKPTWLEVDAGKMEGTYK                | 165 | 18 | 4  | 23     | b9y9y10°y10                                                       | 2082.01 | 64.613  | 27865 | 3 | 694.67  | -6.57  |

|                                                      |    |                       |                                 |     |    |    |        |                                                             |         |         |        |   |         |        |
|------------------------------------------------------|----|-----------------------|---------------------------------|-----|----|----|--------|-------------------------------------------------------------|---------|---------|--------|---|---------|--------|
| I054297 RS4_SALTY 30S ribosomal protein S4           | 7  |                       | KPERSDLSADINEHLIVELYSK          | 184 | 22 | 3  | 13.45  | b7b13y11                                                    | 2556.33 | 112.240 | 5701   | 3 | 852.78  | -0.29  |
| I0A299 RL7_SALTY 50S ribosomal protein L7/L12        | 1  |                       | DLVESAPAALK                     | 85  | 11 | 8  | 81.81  | b2y4y5y6y7y8y9y11                                           | 1113.61 | 54.131  | 73449  | 2 | 557.31  | -5.81  |
| I0A299 RL7_SALTY 50S ribosomal protein L7/L12        | 2  |                       | DQIIEAVSAMSVM DVVELISAMEE K     | 5   | 25 | 24 | 168.5  | b2*b2b3*b3b4b5b6b7b8b10b20y2*y2y3y4y5*y5y6y7y9y10*y10y11y25 | 2737.34 | 137.101 | 26598  | 3 | 913.12  | 3.57   |
| I0A299 RL7_SALTY 50S ribosomal protein L7/L12        | 3  |                       | SITKDQIIEAVSAMSVM DVVELISA MEEK | 1   | 29 | 9  | 45.4   | y2*y2y3y6y7y9*y9y10y15                                      | 3166.61 | 136.497 | 5447   | 3 | 1056.21 | 6.71   |
| I0A299 RL7_SALTY 50S ribosomal protein L7/L12        | 4  |                       | SLEEAGAEVEVK                    | 109 | 12 | 5  | 26.28  | b5y2y9y10y12                                                | 1260.63 | 45.988  | 2786   | 2 | 630.82  | 1.84   |
| I0A299 RL7_SALTY 50S ribosomal protein L7/L12        | 5  |                       | EAKDLVESAPAALK                  | 82  | 14 | 6  | 31.57  | b4*b4b11b13*b13y8                                           | 1441.79 | 60.934  | 7674   | 2 | 721.40  | 2.37   |
| I0A299 RL7_SALTY 50S ribosomal protein L7/L12        | 6  |                       | DDAEALKK                        | 101 | 8  | 6  | 62.59  | b3y3y4y5*y5y6                                               | 889.45  | 26.583  | 1958   | 2 | 445.23  | -10.57 |
| I0A299 RL7_SALTY 50S ribosomal protein L7/L12        | 7  | Oxidation+M(13)       | DQIIEAVSAMSVM DVVELISAMEE K     | 5   | 25 | 4  | 23.12  | b17y12y14y15                                                | 2753.34 | 136.669 | 5108   | 3 | 918.45  | 4.08   |
| I0A299 RL7_SALTY 50S ribosomal protein L7/L12        | 8  | Oxidation+M()         | SITKDQIIEAVSAMSVM DVVELISA MEEK | 1   | 29 | 6  | 25.31  | b6b12b24y4y7y12                                             | 3182.58 | 96.926  | 3092   | 4 | 796.40  | -1.07  |
| I0A299 RL7_SALTY 50S ribosomal protein L7/L12        | 9  |                       | VESAPAALK                       | 87  | 9  | 0  | 2.42   |                                                             | 885.49  | 54.093  | 1748   | 2 | 443.25  | -14.06 |
| I8ZKQ1 LSRB_SALTY Autoinducer 2-binding protein lsrB | 1  |                       | LVGVGFFTSGGNGAQEAGK             | 35  | 19 | 11 | 39.17  | b1b2b12b16*b16y1y3y4y12y15y19                               | 1795.92 | 90.539  | 109756 | 3 | 599.31  | 12.64  |
| I8ZKQ1 LSRB_SALTY Autoinducer 2-binding protein lsrB | 2  |                       | AYPDLDAIIPDANALPAAQAEE NLKR     | 209 | 28 | 21 | 165.63 | b2b5b6b7b8b9b10b11b13y1y4y5*y5y6y9y12y18y19y20y23y28        | 2863.50 | 88.330  | 82219  | 3 | 955.17  | 1.36   |
| I8ZKQ1 LSRB_SALTY Autoinducer 2-binding protein lsrB | 3  |                       | NNLAIVGFSTPNVMRPYVQR            | 237 | 20 | 16 | 76.98  | b2*b2b3*b3b4*b4b5*b5b13y5y12*y12y15y16y17y20                | 2276.20 | 78.745  | 79937  | 3 | 759.40  | -0.64  |
| I8ZKQ1 LSRB_SALTY Autoinducer 2-binding protein lsrB | 4  | Carbamidomethyl+C(12) | ILTWSDSTKPECR                   | 111 | 13 | 12 | 97.03  | b1b2b5y2y4y5y6y7y8y9y11y13                                  | 1620.75 | 50.802  | 67821  | 3 | 540.92  | -11.07 |
| I8ZKQ1 LSRB_SALTY Autoinducer 2-binding protein lsrB | 5  |                       | SLQTAEGIIK                      | 199 | 10 | 5  | 33.93  | y2y4y5y7y10                                                 | 1059.60 | 51.694  | 57293  | 2 | 530.30  | -7.83  |
| I8ZKQ1 LSRB_SALTY Autoinducer 2-binding protein lsrB | 6  |                       | VAFFYSSPTVTDQNQWVK              | 154 | 18 | 9  | 60.91  | b6b9b10y7y8*y8y12y13y18                                     | 2117.06 | 78.501  | 50182  | 2 | 1059.03 | 11.99  |
| I8ZKQ1 LSRB_SALTY Autoinducer 2-binding protein lsrB | 7  |                       | VTVSPNSEQGYHYEAK                | 301 | 16 | 12 | 99.3   | b6*b6y2y4y7y8y10y11y12y13y14y16                             | 1808.83 | 37.133  | 49888  | 3 | 603.61  | -9.65  |
| I8ZKQ1 LSRB_SALTY Autoinducer 2-binding protein lsrB | 8  |                       | EFGLDV VVQQGK                   | 261 | 12 | 7  | 36.2   | b6b10y1y4y5*y5y12                                           | 1405.71 | 83.349  | 42651  | 2 | 703.36  | -0.61  |
| I8ZKQ1 LSRB_SALTY Autoinducer 2-binding protein lsrB | 9  |                       | ISVYVANALLK                     | 273 | 11 | 6  | 56.02  | b4y4y6y7y10y11                                              | 1190.71 | 74.328  | 36636  | 2 | 595.86  | -3.28  |
| I8ZKQ1 LSRB_SALTY Autoinducer 2-binding protein lsrB | 10 |                       | SYIINQGTPK                      | 124 | 10 | 7  | 26.94  | b2b6y6y8*y8*y8y10                                           | 1170.58 | 39.068  | 32247  | 2 | 585.79  | 0.31   |
| I8ZKQ1 LSRB_SALTY Autoinducer 2-binding protein lsrB | 11 |                       | GNGIVLLPER                      | 317 | 10 | 6  | 33.93  | b2*b2y3y5y6y10                                              | 1067.61 | 62.121  | 21709  | 2 | 534.31  | -7.78  |
| I8ZKQ1 LSRB_SALTY Autoinducer 2-binding protein lsrB | 12 |                       | GTVKEFGLDV VVQQGK               | 257 | 16 | 4  | 17.18  | b10*b10b12y8                                                | 1790.92 | 76.931  | 11805  | 3 | 597.65  | -11.18 |
| I8ZKQ1 LSRB_SALTY Autoinducer 2-binding protein lsrB | 13 |                       | ISQHEPGWEIVTTQFGYNDATK          | 177 | 22 | 7  | 29     | b3b8*b8y6y7y12*y12                                          | 2521.21 | 127.521 | 3837   | 3 | 841.07  | 2.52   |
| I8ZKQ1 LSRB_SALTY Autoinducer 2-binding protein lsrB | 14 |                       | IAFIPK                          | 29  | 6  | 2  | 26.87  | y4y5                                                        | 688.43  | 54.567  | 17546  | 2 | 344.72  | -12.23 |
| I8ZKQ1 LSRB_SALTY Autoinducer 2-binding protein lsrB | 15 |                       | QLGSMLEVMAAHQVDK                | 134 | 16 | 4  | 23.72  | b8*b8y5y6                                                   | 1756.91 | 90.545  | 1609   | 3 | 586.31  | 19.52  |
| I8ZKQ1 LSRB_SALTY Autoinducer 2-binding protein lsrB | 16 |                       | SYIINQGTPKQLGSMLEVMAAHQ VDK     | 124 | 26 | 4  | 15.82  | b9b17y9y12                                                  | 2908.41 | 110.760 | 5902   | 4 | 727.86  | -9.49  |
| I8ZKQ1 LSRB_SALTY Autoinducer 2-binding protein lsrB | 17 |                       | EFGLDV VVQQGKISVYVANALLK        | 261 | 23 | 5  | 43.03  | b8b10b11b12b18                                              | 2577.39 | 103.600 | 5495   | 3 | 859.80  | -8.53  |

|                                                      |    |                                             |                                   |     |    |    |        |                                                                      |         |         |        |   |         |        |
|------------------------------------------------------|----|---------------------------------------------|-----------------------------------|-----|----|----|--------|----------------------------------------------------------------------|---------|---------|--------|---|---------|--------|
| Q8ZKQ1 LSRB_SALTY Autoinducer 2-binding protein lsrB | 18 |                                             | AKISQEHPGWEIVTTQFGYNDATK          | 175 | 24 | 6  | 22.02  | b10°b10y11°y11y12°y12                                                | 2720.31 | 112.879 | 4465   | 3 | 907.44  | -9.06  |
| Q8ZKQ1 LSRB_SALTY Autoinducer 2-binding protein lsrB | 19 |                                             | SSPTVTDQNQWVK                     | 159 | 13 | 0  | 5.24   |                                                                      | 1489.71 | 78.533  | 2956   | 3 | 497.24  | -13.93 |
| Q8ZKQ1 LSRB_SALTY Autoinducer 2-binding protein lsrB | 20 | Carbamidomethyl+C(10)                       | TWDSDTKPECR                       | 113 | 11 | 0  | 3.23   |                                                                      | 1394.61 | 50.807  | 2228   | 2 | 697.81  | 4.90   |
| Q8ZKP7 TPIS_SALTY Triosephohate isomerase            | 1  |                                             | SATPAQAQAVHK                      | 176 | 12 | 22 | 123.37 | b2°b2b3°b3b7°b7b12y1y2y3y4y5°y5y6°y6y7°y7y8y9y10°y10y12              | 1208.63 | 19.767  | 40350  | 2 | 604.82  | -3.53  |
| Q8ZKP7 TPIS_SALTY Triosephohate isomerase            | 2  |                                             | TQGAAAFEGAVIAYEPVWAIGTGK          | 152 | 24 | 15 | 50.36  | b1b2°b2°b2b3b7°b7b11b12b15°b15y11°y11y12y24                          | 2407.26 | 94.471  | 32900  | 2 | 1204.13 | 13.39  |
| Q8ZKP7 TPIS_SALTY Triosephohate isomerase            | 3  | Carbamidomethyl+C(8)                        | ELTGVAGCDVAIAPPEMYIDLAKR          | 28  | 24 | 6  | 12.72  | b2b13°b13y1y4y11                                                     | 2589.31 | 83.531  | 30360  | 3 | 863.77  | 0.94   |
| Q8ZKP7 TPIS_SALTY Triosephohate isomerase            | 4  |                                             | HPLVMGNWK                         | 2   | 9  | 5  | 53.29  | b3y3y5y8y9                                                           | 1081.56 | 51.716  | 10970  | 2 | 541.29  | 2.48   |
| Q8ZKP7 TPIS_SALTY Triosephohate isomerase            | 5  |                                             | DIGAQYIIIGHSER                    | 84  | 14 | 6  | 15.62  | b2y2y6°y6y12y14                                                      | 1571.83 | 65.411  | 8412   | 2 | 786.42  | 8.70   |
| Q8ZKP7 TPIS_SALTY Triosephohate isomerase            | 6  |                                             | ESDELIACK                         | 103 | 9  | 4  | 30.51  | b3b7y8y9                                                             | 1032.56 | 27.738  | 6715   | 2 | 516.78  | -1.66  |
| Q8ZKP7 TPIS_SALTY Triosephohate isomerase            | 7  | Carbamidomethyl+C(9)                        | EQGLTPVLCIGETEAEENEAGK            | 117 | 21 | 5  | 22.34  | b5°b5b6°b6y9                                                         | 2245.06 | 66.224  | 4033   | 3 | 749.02  | -2.83  |
| Q8ZKP7 TPIS_SALTY Triosephohate isomerase            | 8  | Carbamidomethyl+C(9)                        | KELTGVAGCDVAIAPPEMYIDLAK          | 27  | 24 | 4  | 19.03  | b10b13b16y2                                                          | 2561.31 | 95.475  | 2363   | 3 | 854.44  | 2.67   |
| Q8ZKP7 TPIS_SALTY Triosephohate isomerase            | 9  | Carbamidomethyl+C(8)                        | ELTGVAGCDVAIAPPEMYIDLAK           | 28  | 23 | 5  | 23.83  | b12y4°y4y9y10                                                        | 2433.24 | 89.045  | 9746   | 2 | 1217.12 | 14.65  |
| Q8ZKP7 TPIS_SALTY Triosephohate isomerase            | 10 | Carbamidomethyl+C(9); Carbamidomethyl+C(26) | EQGLTPVLCIGETEAEENEAGKTEEV CAR    | 117 | 28 | 20 | 165.56 | b5°b5y3y4y5°y5y7y12°y12y13y14y15y18y20y21y23°y23y24y25y26            | 3090.45 | 73.070  | 181004 | 3 | 1030.82 | 3.79   |
| Q8ZKP7 TPIS_SALTY Triosephohate isomerase            | 11 | Carbamidomethyl+C(5)                        | TEEV CARQIDAVLK                   | 138 | 14 | 3  | 27.09  | b3b4b8                                                               | 1631.83 | 45.095  | 2460   | 3 | 544.62  | -6.06  |
| Q8ZKP7 TPIS_SALTY Triosephohate isomerase            | 12 | Oxidation+M()                               | AAAGSHIMLGAQNVLDNLSGAFTGETSAEMLK  | 52  | 32 | 4  | 22.8   | b3b4b9°b9                                                            | 3220.60 | 114.415 | 3913   | 4 | 805.91  | 12.13  |
| Q8ZKP7 TPIS_SALTY Triosephohate isomerase            | 13 |                                             | TPAQAQAVHK                        | 178 | 10 | 8  | 44.96  | b3°b3b4°b4°b4b5b8°b8                                                 | 1050.57 | 19.767  | 17119  | 2 | 525.79  | -3.60  |
| Q8ZKP7 TPIS_SALTY Triosephohate isomerase            | 14 |                                             | PAQAQAVHK                         | 179 | 9  | 10 | 79.2   | b3°b3b4°b4b5°b5b6°b6b7b8                                             | 949.52  | 19.768  | 14461  | 2 | 475.26  | -6.69  |
| Q8ZKP7 TPIS_SALTY Triosephohate isomerase            | 15 |                                             | PLVMGNWK                          | 3   | 8  | 1  | 8.82   | b6                                                                   | 944.51  | 51.678  | 6741   | 1 | 944.51  | 6.85   |
| Q8ZKP7 TPIS_SALTY Triosephohate isomerase            | 16 |                                             | ATPAQAQAVHK                       | 177 | 11 | 3  | 17.52  | b3°b3b5                                                              | 1121.60 | 19.778  | 1942   | 2 | 561.30  | -8.92  |
| Q8ZKP7 TPIS_SALTY Triosephohate isomerase            | 17 |                                             | SATPAQAQAVHK                      | 176 | 12 | 0  | 2.82   |                                                                      | 1190.61 | 19.771  | 13158  | 3 | 397.54  | -11.59 |
| P0A1Z2 SKP_SALTY Chaperone protein skp               | 1  |                                             | IAIVNMGNLFQQVAQK                  | 23  | 16 | 27 | 178.43 | b1b2b3b4b6°b6b8b15y1y2°y2y3°y3y4y5°y5y6°y6y7y8y9y11y12y13°y13y16°y16 | 1773.97 | 90.543  | 247937 | 2 | 887.49  | 0.07   |
| P0A1Z2 SKP_SALTY Chaperone protein skp               | 2  |                                             | TGVSNTLENEFK                      | 39  | 12 | 19 | 135.36 | b2°b2b3b9°b9b10y2y4y5y6y7y8°y8°y8y9°y9y10y11y12                      | 1338.65 | 58.395  | 200556 | 2 | 669.83  | -3.01  |
| P0A1Z2 SKP_SALTY Chaperone protein skp               | 3  |                                             | VANDQSIDLVDANTVAYNSSDV K DITADVLK | 126 | 32 | 13 | 77.3   | b3b4b5°b5b10b11b12°b12°b12b13b15y1y25                                | 3392.72 | 90.599  | 94062  | 3 | 1131.58 | 3.60   |
| P0A1Z2 SKP_SALTY Chaperone protein skp               | 4  |                                             | IAIVNMGNLFQQVAQKGTGSNTLENEFK      | 23  | 28 | 8  | 37.6   | b8b12y5y8y10°y10y12y23                                               | 3093.56 | 103.478 | 3165   | 4 | 774.15  | -14.13 |
| P0A1Z2 SKP_SALTY Chaperone protein skp               | 5  |                                             | AAELQKMETDLQSK                    | 53  | 14 | 3  | 19.31  | b5y3y6                                                               | 1591.80 | 66.217  | 2200   | 3 | 531.27  | -0.15  |
| P0A1Z2 SKP_SALTY Chaperone protein skp               | 6  | Oxidation+M(6)                              | LEKDVMSQR                         | 82  | 9  | 4  | 45     | b5b7y3y4                                                             | 1121.57 | 75.301  | 3223   | 1 | 1121.57 | 9.03   |

|                                        |    |                      |                               |     |    |    |        |                                                                  |         |         |        |   |         |        |
|----------------------------------------|----|----------------------|-------------------------------|-----|----|----|--------|------------------------------------------------------------------|---------|---------|--------|---|---------|--------|
| P65702 PGK_SALTY Phohoglycerate kinase | 1  | Carbamidomethyl+C(6) | FADVACAGPLLAELDALGK           | 156 | 20 | 18 | 133.47 | b2b3b4b7b8b9b15°b15y2y3y4y6y8y9y13y14y15y20                      | 2002.04 | 99.683  | 200943 | 2 | 1001.53 | 5.73   |
| P65702 PGK_SALTY Phohoglycerate kinase | 2  |                      | SVNDVKEDEQILDIGDASAQQLAEILK   | 272 | 27 | 24 | 136.38 | b2b4°b4b5°b5°b5b11b12b13°b13b14b17b25b26y1y2y3y4y5y7y10y12y13y27 | 2941.51 | 100.727 | 192931 | 3 | 981.18  | 3.73   |
| P65702 PGK_SALTY Phohoglycerate kinase | 3  |                      | VLPAVAMLEER                   | 373 | 11 | 8  | 87.26  | b3y3y4y6y7y8°y8y9                                                | 1227.67 | 80.820  | 155107 | 2 | 614.34  | -4.77  |
| P65702 PGK_SALTY Phohoglycerate kinase | 4  |                      | VMVTSHLGRPTGEYNEEFSLLPV VNYLK | 53  | 29 | 9  | 26.02  | b1b2b5b18b21°b21b22y7y29                                         | 3321.66 | 92.801  | 132120 | 4 | 831.17  | -7.13  |
| P65702 PGK_SALTY Phohoglycerate kinase | 5  | Carbamidomethyl+C(5) | LLTTCDIPVPTDVR                | 244 | 14 | 18 | 139.85 | b2b5°b5b6b7°b7b9b12y2y5°y5y7y8y9y10y11y12y14                     | 1599.84 | 69.382  | 113686 | 2 | 800.42  | 0.53   |
| P65702 PGK_SALTY Phohoglycerate kinase | 6  |                      | VATEFSETAPATLK                | 258 | 14 | 20 | 163.87 | b2b3°b3b4b8b9b14y1y3y5y6y7y9°y9y10y11y12°y12y13y14               | 1464.76 | 53.201  | 109511 | 2 | 732.88  | 1.00   |
| P65702 PGK_SALTY Phohoglycerate kinase | 7  |                      | SLYEADLVDEAKR                 | 231 | 13 | 9  | 92.83  | y2y3y5y6y8y9y10y11y13                                            | 1508.74 | 54.763  | 97811  | 3 | 503.58  | -13.59 |
| P65702 PGK_SALTY Phohoglycerate kinase | 8  |                      | TILWNGPVGVFEPNFR              | 302 | 17 | 20 | 130.38 | b2b11b12b13°b13y2y4*y4y5y6°y6y7*y7y11*y11y12y13°y13y14y17        | 1993.04 | 106.996 | 83182  | 2 | 997.03  | 5.21   |
| P65702 PGK_SALTY Phohoglycerate kinase | 9  |                      | ADLNVPVKEGK                   | 19  | 11 | 12 | 82.03  | b5°b5b9y1y2y3y4°y4y6y7y8y11                                      | 1169.66 | 37.444  | 68141  | 2 | 585.33  | 3.13   |
| P65702 PGK_SALTY Phohoglycerate kinase | 10 |                      | ASLPTIELALK                   | 38  | 11 | 7  | 65.56  | y1y3y4y6y7y8y11                                                  | 1155.69 | 77.954  | 67861  | 2 | 578.35  | -6.65  |
| P65702 PGK_SALTY Phohoglycerate kinase | 11 |                      | LTVLDSLSK                     | 197 | 9  | 5  | 38.3   | y2y3y4y6y9                                                       | 975.56  | 62.514  | 64727  | 2 | 488.29  | -8.70  |
| P65702 PGK_SALTY Phohoglycerate kinase | 12 |                      | LVKDYLDGVDV AEGELVVLENV R     | 90  | 23 | 7  | 50.8   | b7b8b13y4y5y6y23                                                 | 2544.36 | 97.652  | 58508  | 3 | 848.79  | 1.82   |
| P65702 PGK_SALTY Phohoglycerate kinase | 13 |                      | TILWNGPVGVFEPNFRK             | 302 | 18 | 8  | 46.47  | b2b12y5y10y13y14y16y18                                           | 2121.11 | 97.398  | 33326  | 3 | 707.71  | -6.45  |
| P65702 PGK_SALTY Phohoglycerate kinase | 14 |                      | MTDLDLAGKR                    | 5   | 10 | 6  | 36.94  | b2y1y3y4y5y10                                                    | 1119.58 | 43.176  | 31180  | 2 | 560.29  | -3.38  |
| P65702 PGK_SALTY Phohoglycerate kinase | 15 |                      | IADQLIVGGGIANTFVAAQGHSVG K    | 206 | 25 | 7  | 35.43  | b1b2b3b4b5y2y3                                                   | 2423.29 | 78.906  | 30890  | 3 | 808.44  | -4.43  |
| P65702 PGK_SALTY Phohoglycerate kinase | 16 | Carbamidomethyl+C(5) | YAALCDVFMDAFGTAHR             | 128 | 18 | 9  | 60.04  | b2b3b4y3y4y6y8y13°y13                                            | 2043.94 | 90.659  | 18706  | 3 | 681.98  | -1.91  |
| P65702 PGK_SALTY Phohoglycerate kinase | 17 |                      | ISYISTGGGAFLEFVEGK            | 355 | 18 | 3  | 15.6   | b9y3y12                                                          | 1874.93 | 81.544  | 1696   | 2 | 937.97  | -12.11 |
| P65702 PGK_SALTY Phohoglycerate kinase | 18 |                      | DYLDGVDV AEGELVVLENVR         | 93  | 20 | 3  | 14.39  | b5b8y7                                                           | 2204.12 | 116.162 | 12638  | 3 | 735.38  | 3.88   |
| P65702 PGK_SALTY Phohoglycerate kinase | 19 |                      | AQASTHGIGK                    | 146 | 10 | 4  | 51.93  | y4y6y7y8                                                         | 969.51  | 16.588  | 5128   | 2 | 485.26  | -5.48  |
| P65702 PGK_SALTY Phohoglycerate kinase | 20 | Carbamidomethyl+C(6) | RLLTTCDIPVPTDVR               | 243 | 15 | 3  | 18.16  | b8y7y10                                                          | 1755.93 | 65.050  | 7465   | 3 | 585.98  | -9.80  |
| P65702 PGK_SALTY Phohoglycerate kinase | 21 |                      | SLYEADLVDEAKR                 | 231 | 13 | 4  | 41.38  | b5b6b8b11                                                        | 1508.75 | 82.382  | 6965   | 3 | 503.59  | -3.16  |
| P65702 PGK_SALTY Phohoglycerate kinase | 22 |                      | TDLDLAGKR                     | 6   | 9  | 2  | 20.7   | b4b7                                                             | 988.54  | 43.210  | 16506  | 2 | 494.77  | -5.12  |
| P65702 PGK_SALTY Phohoglycerate kinase | 23 |                      | YEADLVDEAKR                   | 233 | 11 | 0  | 3.23   |                                                                  | 1308.64 | 54.770  | 13546  | 2 | 654.83  | 0.65   |
| P65702 PGK_SALTY Phohoglycerate kinase | 24 |                      | DLNVPVKEGK                    | 20  | 10 | 2  | 21.89  | b3b4                                                             | 1098.61 | 37.450  | 7929   | 2 | 549.81  | -8.89  |
| P0A1D3 CH60_SALTY 60 kDa chaperonin    | 1  |                      | GYLSPYFINKPETGAVELESPFILLADKK | 197 | 29 | 25 | 209.28 | b2b3b4°b4b5b12y1y2y3y4y5y6y7y9y10y11y12y13y14y19y22y25y26y27y29  | 3239.71 | 96.271  | 229882 | 4 | 810.68  | -5.12  |

|                                      |    |                       |                               |     |    |    |        |                                                                                         |         |         |        |   |         |        |
|--------------------------------------|----|-----------------------|-------------------------------|-----|----|----|--------|-----------------------------------------------------------------------------------------|---------|---------|--------|---|---------|--------|
| IP0A1D3 CH60_SALTY 60 kDa chaperonin | 2  |                       | EMLPVL EAVAK                  | 231 | 11 | 8  | 68.58  | b2y2y3y4y6y8y9y11                                                                       | 1199.66 | 80.757  | 143928 | 2 | 600.34  | -4.58  |
| IP0A1D3 CH60_SALTY 60 kDa chaperonin | 3  |                       | ANDAAGDGT TATVLAQSIITEGLK     | 80  | 25 | 23 | 184.08 | b2b3*b3b4*b4*b4b5b6b7b25y1y2y3y4y5y6y7y8y9y10y11y12y25                                  | 2418.23 | 92.871  | 139760 | 3 | 806.75  | -3.33  |
| IP0A1D3 CH60_SALTY 60 kDa chaperonin | 4  | Carbamidomethyl+C(18) | SALQYAASVAGL MITTECMVTDLPK    | 501 | 25 | 33 | 211.31 | b2b3*b3b4*b4b5*b5*b5b6*b6b7*b7b8b9*b9b10b11*b11b12*b12y1y2y3y4y5y6y7y10*y10y11y13y15y25 | 2670.31 | 124.951 | 125939 | 3 | 890.78  | -2.19  |
| IP0A1D3 CH60_SALTY 60 kDa chaperonin | 5  |                       | AVAAAVEELK                    | 122 | 10 | 13 | 100.08 | b2b3b5y1y2y3y4*y4y5y6y7y8y10                                                            | 1000.56 | 47.936  | 105757 | 2 | 500.78  | -9.94  |
| IP0A1D3 CH60_SALTY 60 kDa chaperonin | 6  | Carbamidomethyl+C(6)  | QIVLNCGEEPSVVANTVK            | 452 | 18 | 16 | 89.89  | b2*b2b3*b3b5y2y4y5y12*y12y13*y13y14y15y16y18                                            | 1957.02 | 62.476  | 94439  | 2 | 979.01  | 6.80   |
| IP0A1D3 CH60_SALTY 60 kDa chaperonin | 7  |                       | QQIEEATSDYDREK                | 350 | 14 | 14 | 109.48 | b14y2y3y5y6y7y8*y8y9y10*y10y12y14*y14                                                   | 1711.75 | 34.202  | 89469  | 3 | 571.26  | -12.98 |
| IP0A1D3 CH60_SALTY 60 kDa chaperonin | 8  | Carbamidomethyl+C(6)  | ALSVPCSDSK                    | 132 | 10 | 12 | 74.41  | b2b3*b3y1y2y3*y3y4y6y7y8y10                                                             | 1063.51 | 35.991  | 72146  | 2 | 532.26  | -1.38  |
| IP0A1D3 CH60_SALTY 60 kDa chaperonin | 9  |                       | GVNVLADAVK                    | 18  | 10 | 7  | 54.94  | y1y3y5y6y8*y8y10                                                                        | 985.56  | 56.581  | 65199  | 2 | 493.28  | -9.04  |
| IP0A1D3 CH60_SALTY 60 kDa chaperonin | 10 |                       | SFGAPTITK                     | 42  | 9  | 14 | 82.76  | b1b2b3b4*b4b8y1y2*y2y3y5*y5y7y9                                                         | 921.49  | 45.569  | 64817  | 2 | 461.25  | -12.32 |
| IP0A1D3 CH60_SALTY 60 kDa chaperonin | 11 |                       | VVINKDTTTHIDGVGEEAAIQGR       | 322 | 23 | 21 | 129.72 | b1b2b9b10b11b12b21y2y3*y3y4y5*y5y6y8y9*y9y12y13*y13y23                                  | 2399.27 | 68.105  | 62933  | 3 | 800.43  | -2.75  |
| IP0A1D3 CH60_SALTY 60 kDa chaperonin | 12 |                       | GGDGNYGYNAAETEEYGNMIDMGILDPTK | 470 | 28 | 9  | 40.8   | y2y3y4y5y8y13*y13*y13y28                                                                | 2966.32 | 89.128  | 58106  | 2 | 1483.67 | 13.99  |
| IP0A1D3 CH60_SALTY 60 kDa chaperonin | 13 |                       | VEDALHATR                     | 395 | 9  | 12 | 117.68 | b2b4b5b6y3y4*y4y5y6y7y8y9                                                               | 1011.51 | 26.797  | 51484  | 2 | 506.26  | -7.00  |
| IP0A1D3 CH60_SALTY 60 kDa chaperonin | 14 |                       | AVAAGMNPMDLK                  | 105 | 12 | 15 | 113.45 | b2b3y2y4y5y6*y6y7y8y9y10*y10y11*y11y12                                                  | 1217.60 | 59.044  | 42307  | 2 | 609.30  | -1.10  |
| IP0A1D3 CH60_SALTY 60 kDa chaperonin | 15 |                       | AIAQVGTISANSDET VGK           | 142 | 18 | 11 | 89.41  | y1y2y8y9y10y11y12y13*y13y14y18                                                          | 1760.91 | 49.119  | 37843  | 2 | 880.96  | 4.99   |
| IP0A1D3 CH60_SALTY 60 kDa chaperonin | 16 |                       | LIAEAMDK                      | 160 | 8  | 8  | 49.36  | b2b6y1y2y3y4y6y8                                                                        | 890.46  | 39.807  | 37391  | 2 | 445.73  | -9.12  |
| IP0A1D3 CH60_SALTY 60 kDa chaperonin | 17 |                       | ATLEDLGQAK                    | 311 | 10 | 4  | 36.94  | y5y6y7y10                                                                               | 1045.55 | 44.824  | 36332  | 2 | 523.28  | -1.05  |
| IP0A1D3 CH60_SALTY 60 kDa chaperonin | 18 |                       | AMEAPLR                       | 445 | 7  | 5  | 40.5   | y2y4y5y6y7                                                                              | 787.40  | 37.460  | 23943  | 2 | 394.21  | -12.71 |
| IP0A1D3 CH60_SALTY 60 kDa chaperonin | 19 |                       | DTTTHIDGVGEEAAIQGR            | 327 | 18 | 4  | 22.76  | b9b13*b13b15                                                                            | 1845.91 | 80.031  | 7975   | 2 | 923.46  | -7.47  |
| IP0A1D3 CH60_SALTY 60 kDa chaperonin | 20 |                       | LAGGVAVIK                     | 371 | 9  | 6  | 79.24  | b6b7y3y4y7y8                                                                            | 827.52  | 45.621  | 70734  | 2 | 414.26  | -15.93 |
| IP0A1D3 CH60_SALTY 60 kDa chaperonin | 21 |                       | GQNEQNVGIK                    | 430 | 11 | 4  | 27.34  | b5y6y7*y7                                                                               | 1201.58 | 27.761  | 35576  | 2 | 601.29  | 0.51   |
| IP0A1D3 CH60_SALTY 60 kDa chaperonin | 22 |                       | VGAATEVEMK                    | 380 | 10 | 3  | 26.94  | b3y3y7                                                                                  | 1034.52 | 36.032  | 32638  | 2 | 517.76  | -0.94  |
| IP0A1D3 CH60_SALTY 60 kDa chaperonin | 23 |                       | VAAVK                         | 272 | 5  | 1  | 13.23  | y3                                                                                      | 487.32  | 45.376  | 14048  | 1 | 487.32  | -12.02 |
| IP0A1D3 CH60_SALTY 60 kDa chaperonin | 24 |                       | GYLSPYFINKPETGAVELESPFILLADK  | 197 | 28 | 6  | 39.03  | b3b4b10*b10b11y12                                                                       | 3111.66 | 102.855 | 7777   | 3 | 1037.89 | 10.98  |
| IP0A1D3 CH60_SALTY 60 kDa chaperonin | 25 |                       | FGNDAR                        | 7   | 6  | 2  | 13.63  | y4*y4                                                                                   | 679.32  | 77.686  | 2394   | 1 | 679.32  | 3.68   |
| IP0A1D3 CH60_SALTY 60 kDa chaperonin | 26 |                       | AAVEEGVVAGGGVALIR             | 404 | 17 | 4  | 36.76  | b3b5b7b14                                                                               | 1567.91 | 67.141  | 2349   | 3 | 523.31  | 21.64  |

|                                           |    |                                        |                                      |     |    |    |        |                                                            |         |         |        |   |         |        |
|-------------------------------------------|----|----------------------------------------|--------------------------------------|-----|----|----|--------|------------------------------------------------------------|---------|---------|--------|---|---------|--------|
| P0A1D3 CH60_SALTY 60 kDa chaperonin       | 27 |                                        | EGVITVEDGTGLQDELDVVEGMQ FDR          | 171 | 26 | 4  | 25.6   | b7b9y4y5                                                   | 2851.37 | 112.528 | 2032   | 3 | 951.13  | 12.93  |
| P0A1D3 CH60_SALTY 60 kDa chaperonin       | 28 |                                        | EIELEDKFENMGAMQMK                    | 58  | 17 | 12 | 81.15  | b5°b5b9b10°b10y5y7y8y10*y10y12y13                          | 2010.94 | 74.085  | 148814 | 3 | 670.98  | -6.13  |
| P0A1D3 CH60_SALTY 60 kDa chaperonin       | 29 |                                        | IADLKGQNEQNNGIK                      | 425 | 16 | 16 | 159.91 | b3b9y3y4y6*y6y7y8y9y10*y10y11*y11y13y14y15                 | 1741.89 | 40.589  | 82238  | 3 | 581.30  | -12.75 |
| P0A1D3 CH60_SALTY 60 kDa chaperonin       | 30 |                                        | AMLQDIATLTGGTVISEEIGMELE KATLEDLGQAK | 286 | 35 | 22 | 128.75 | b3b4b5b6b7°b7°b7b10°b10b13y5y6y7°y7*y7y8*y8y10y20y21y26y29 | 3675.90 | 122.787 | 30458  | 3 | 1225.97 | 7.77   |
| P0A1D3 CH60_SALTY 60 kDa chaperonin       | 31 |                                        | VAQIRQQIEEATSDYDR                    | 345 | 17 | 4  | 16.34  | b3°b3y10y12                                                | 2022.01 | 55.603  | 4807   | 3 | 674.67  | 9.54   |
| P0A1D3 CH60_SALTY 60 kDa chaperonin       | 32 |                                        | AVAAGMNPMDLKR                        | 105 | 13 | 4  | 20.67  | b6b8y10°y10                                                | 1373.69 | 56.095  | 1665   | 2 | 687.35  | -9.77  |
| P0A1D3 CH60_SALTY 60 kDa chaperonin       | 33 |                                        | DGVSVAREIELEDK                       | 51  | 14 | 5  | 39.08  | b3b13y7y9y10                                               | 1559.77 | 63.803  | 1591   | 2 | 780.39  | -14.48 |
| P0A1D3 CH60_SALTY 60 kDa chaperonin       | 34 | Oxidation+M(2)                         | AMLQDIATLTGGTVISEEIGMELE K           | 286 | 25 | 7  | 32.03  | b4b5b7b9y5°y5y21                                           | 2665.31 | 93.240  | 16022  | 3 | 889.11  | -9.16  |
| P0A1D3 CH60_SALTY 60 kDa chaperonin       | 35 | Carbamidomethyl+C(18) ;Oxidation+M(13) | SALQYAASVAGLMITTECMVTDL PK           | 501 | 25 | 6  | 12.42  | b6°b6°b6y8°y8y10                                           | 2686.34 | 119.902 | 6219   | 3 | 896.12  | 10.63  |
| P0A1D3 CH60_SALTY 60 kDa chaperonin       | 36 | Oxidation+M(9)                         | VGAATEVEMKEK                         | 380 | 12 | 6  | 48.19  | b3b4b6y10°y10y11                                           | 1307.65 | 74.670  | 6092   | 3 | 436.55  | -4.48  |
| P0A1D3 CH60_SALTY 60 kDa chaperonin       | 37 | Oxidation+M(6)                         | LIAEAMDK                             | 160 | 8  | 4  | 51.12  | b5b7y4y5                                                   | 906.45  | 97.612  | 3994   | 1 | 906.45  | -6.13  |
| P0A1D3 CH60_SALTY 60 kDa chaperonin       | 38 |                                        | EDALHATR                             | 396 | 8  | 0  | 1.61   |                                                            | 912.45  | 26.783  | 42718  | 2 | 456.73  | -5.55  |
| P0A1D3 CH60_SALTY 60 kDa chaperonin       | 39 |                                        | GAPTITK                              | 44  | 7  | 2  | 8.82   | b5°b5                                                      | 687.40  | 45.571  | 17606  | 1 | 687.40  | -8.79  |
| P0A1D3 CH60_SALTY 60 kDa chaperonin       | 40 |                                        | NVLADAVK                             | 20  | 8  | 0  | 2.02   |                                                            | 829.48  | 56.544  | 11587  | 1 | 829.48  | -2.72  |
| P0A1D3 CH60_SALTY 60 kDa chaperonin       | 41 | Carbamidomethyl+C(4)                   | SVPCSDSK                             | 134 | 8  | 0  | 2.02   |                                                            | 879.39  | 35.990  | 3233   | 1 | 879.39  | 5.48   |
| P0A1D3 CH60_SALTY 60 kDa chaperonin       | 42 |                                        | EMLPVLEAVAK                          | 231 | 11 | 0  | 2.42   |                                                            | 1181.65 | 80.772  | 6654   | 2 | 591.33  | -5.37  |
| P0A1D3 CH60_SALTY 60 kDa chaperonin       | 43 |                                        | QQIEEATSDYDREK                       | 350 | 14 | 0  | 3.63   |                                                            | 1694.74 | 34.203  | 3104   | 3 | 565.58  | -5.55  |
| P0A1D3 CH60_SALTY 60 kDa chaperonin       | 44 |                                        | SFGAPTITK                            | 42  | 9  | 0  | 1.61   |                                                            | 903.50  | 45.528  | 1534   | 2 | 452.25  | 13.04  |
| P66313 RL6_SALTY 50S ribosomal protein L6 | 1  |                                        | APVVVPAGVDVK                         | 6   | 12 | 12 | 128.14 | b2b3b4b5y3y5y6y7y8y9y10y12                                 | 1150.68 | 53.961  | 83026  | 2 | 575.84  | -6.05  |
| P66313 RL6_SALTY 50S ribosomal protein L6 | 2  |                                        | TLNDAVEVK                            | 35  | 9  | 6  | 38.3   | y1y3°y3y7y8y9                                              | 988.52  | 39.157  | 54773  | 2 | 494.76  | -9.57  |
| P66313 RL6_SALTY 50S ribosomal protein L6 | 3  |                                        | ALLNSMVIGVTEGFTK                     | 69  | 16 | 11 | 84.51  | b2b5b6b7y2y5y6y7y8y12y16                                   | 1679.90 | 95.010  | 51373  | 2 | 840.45  | -3.49  |
| P66313 RL6_SALTY 50S ribosomal protein L6 | 4  |                                        | INGQVITIK                            | 18  | 9  | 6  | 64.76  | b3y3y4y7y8y9                                               | 985.59  | 49.033  | 50665  | 2 | 493.30  | -9.41  |
| P66313 RL6_SALTY 50S ribosomal protein L6 | 5  |                                        | QVIGQVAADLR                          | 138 | 11 | 7  | 68.58  | y1y2y3y5y6y8y9                                             | 1169.65 | 57.984  | 24760  | 2 | 585.33  | -7.72  |
| P66313 RL6_SALTY 50S ribosomal protein L6 | 6  |                                        | HADNALTFGPR                          | 44  | 11 | 10 | 71.01  | b2b5y3y4y5y9*y9y10*y10y11                                  | 1198.59 | 46.050  | 14791  | 2 | 599.80  | -3.06  |
| P66313 RL6_SALTY 50S ribosomal protein L6 | 7  |                                        | YADEVVR                              | 163 | 7  | 4  | 40.5   | y3y4y5°y5                                                  | 851.42  | 31.060  | 53301  | 2 | 426.21  | -8.67  |
| P66313 RL6_SALTY 50S ribosomal protein L6 | 8  | Carbamidomethyl+C(26)                  | GNVVNLSLGFSPVDHQLPAGIT AECTPTQTEIVLK | 99  | 35 | 3  | 10.93  | b4y11y22                                                   | 3741.87 | 80.474  | 30561  | 4 | 936.22  | -15.14 |
| P66313 RL6_SALTY 50S ribosomal protein L6 | 9  |                                        | LQLVGVGYYR                           | 86  | 9  | 3  | 38.3   | y3y5y6                                                     | 1004.58 | 60.199  | 27236  | 2 | 502.79  | -6.80  |

|                                                                        |    |                      |                               |     |    |    |        |                                                     |         |         |        |   |         |        |
|------------------------------------------------------------------------|----|----------------------|-------------------------------|-----|----|----|--------|-----------------------------------------------------|---------|---------|--------|---|---------|--------|
| P0A283 PTGA_SALTY Glucose-ecific phohotransferase enzyme IIA component | 1  |                      | STLTpVVISNMDEIKELIK           | 133 | 19 | 19 | 117.5  | b2°b2b3°b3b4°b4b19y3y4°y4y5y6y11°y11y12y13y15y17y19 | 2130.15 | 93.160  | 259376 | 3 | 710.72  | -8.94  |
| P0A283 PTGA_SALTY Glucose-ecific phohotransferase enzyme IIA component | 2  |                      | MVAPVDGTIGK                   | 59  | 11 | 16 | 111.5  | b2b3b8y1y2y3y5°y5y6y7y8°y8y9°y9y10y11               | 1087.58 | 46.846  | 152858 | 2 | 544.29  | -6.17  |
| P0A283 PTGA_SALTY Glucose-ecific phohotransferase enzyme IIA component | 3  |                      | VGDPVIEFDLPLLEEK              | 115 | 16 | 15 | 109.94 | b1b3b5b6b8°b8y3°y3y6y7y9y10y11y13y16                | 1812.97 | 100.295 | 121242 | 2 | 906.99  | 3.50   |
| P0A283 PTGA_SALTY Glucose-ecific phohotransferase enzyme IIA component | 4  |                      | DTGTIEIVAPLSGEIVNIEDVPDVVFAEK | 16  | 29 | 5  | 11.54  | b2b5y10y14*y14                                      | 3069.57 | 102.883 | 2186   | 3 | 1023.86 | -6.12  |
| P0A283 PTGA_SALTY Glucose-ecific phohotransferase enzyme IIA component | 5  |                      | IVGDGIAIKPTGNK                | 45  | 14 | 19 | 180.41 | b3b4b5°b5y3y4y5°y5*y5y6*y6y7y8y9y10y11y12*y12y13    | 1382.77 | 44.166  | 168702 | 3 | 461.60  | -20.39 |
| P0A283 PTGA_SALTY Glucose-ecific phohotransferase enzyme IIA component | 6  |                      | VKVGDpVIEFDLPLLEEK            | 113 | 18 | 13 | 93.54  | b5b6b7b9y3°y3y4y6°y6y8°y8y10y13                     | 2040.11 | 95.812  | 116164 | 3 | 680.71  | -9.75  |
| P0A283 PTGA_SALTY Glucose-ecific phohotransferase enzyme IIA component | 7  |                      | IAEEGQRVK                     | 106 | 9  | 6  | 45.51  | b3b7b8°b8y8*y8                                      | 1029.55 | 39.716  | 12552  | 2 | 515.28  | -13.87 |
| P0A283 PTGA_SALTY Glucose-ecific phohotransferase enzyme IIA component | 8  |                      | PVDGTIGK                      | 62  | 8  | 8  | 65.56  | b3b4°b4b5°b5b6°b6b7                                 | 786.43  | 46.828  | 3755   | 1 | 786.43  | -10.32 |
| P0A283 PTGA_SALTY Glucose-ecific phohotransferase enzyme IIA component | 9  |                      | LTPVVISNMDEIKELIK             | 135 | 17 | 1  | 7.42   | b12                                                 | 1942.07 | 93.161  | 1767   | 2 | 971.54  | -13.51 |
| P00924 ENO1_YEAST Enolase 1                                            | 1  |                      | NVNDVIAPAFVK                  | 67  | 12 | 21 | 156.83 | b1b2*b2b4*b4b5b6*b6b7*b7b8y2y3y5y6y7y8y9y10*y10y12  | 1286.71 | 66.832  | 102203 | 2 | 643.86  | -1.71  |
| P00924 ENO1_YEAST Enolase 1                                            | 2  |                      | VNQIGTLSESIK                  | 346 | 12 | 8  | 68.99  | b2b5y5y6y7y8y9y12                                   | 1288.71 | 55.036  | 88146  | 2 | 644.86  | -0.19  |
| P00924 ENO1_YEAST Enolase 1                                            | 3  |                      | SIVPSGASTGVHEALEMR            | 32  | 18 | 12 | 106.54 | b2y1y2y6y7y9y10y11y13y14y15y16                      | 1840.91 | 62.009  | 79920  | 3 | 614.31  | -6.90  |
| P00924 ENO1_YEAST Enolase 1                                            | 4  |                      | TAGIQIVADDLTVTNPK             | 312 | 17 | 10 | 77.05  | b3b5y3y4y10y11y12y13*y13y17                         | 1755.96 | 73.258  | 54977  | 2 | 878.48  | 6.40   |
| P00924 ENO1_YEAST Enolase 1                                            | 5  |                      | AVDDFLISLDGTANK               | 88  | 15 | 4  | 18.16  | b5y5y8y15                                           | 1578.80 | 83.005  | 29908  | 2 | 789.91  | 1.24   |
| P00924 ENO1_YEAST Enolase 1                                            | 6  |                      | WLTGPQLADLYHSLMK              | 272 | 16 | 7  | 37.92  | b1b13y8y9y11y14°y14                                 | 1872.94 | 96.710  | 22887  | 3 | 624.99  | -12.58 |
| P00924 ENO1_YEAST Enolase 1                                            | 7  |                      | AAQDSFAAGWGMVSHR              | 358 | 17 | 5  | 23.74  | y7y10°y10y12y17                                     | 1789.85 | 61.834  | 3940   | 2 | 895.43  | 3.14   |
| P00924 ENO1_YEAST Enolase 1                                            | 8  |                      | IEEELGDNAVFAGENFHHGDK         | 415 | 21 | 4  | 13.89  | b7y9y11y21                                          | 2328.02 | 78.365  | 2413   | 3 | 776.68  | -13.32 |
| P00924 ENO1_YEAST Enolase 1                                            | 9  |                      | AADALLK                       | 338 | 8  | 6  | 75.83  | b6y3y4y5y6y7                                        | 814.49  | 54.287  | 79262  | 2 | 407.75  | -16.19 |
| P00924 ENO1_YEAST Enolase 1                                            | 10 |                      | TFAEALR                       | 178 | 7  | 5  | 66.96  | b3b4y3y5y6                                          | 807.42  | 46.139  | 60791  | 2 | 404.22  | -15.50 |
| P00924 ENO1_YEAST Enolase 1                                            | 11 |                      | YDLDFK                        | 258 | 6  | 2  | 26.87  | y3y4                                                | 800.37  | 55.622  | 60430  | 2 | 400.69  | -14.26 |
| P00924 ENO1_YEAST Enolase 1                                            | 12 |                      | LNQLLR                        | 409 | 6  | 4  | 26.87  | y4*y4y5*y5                                          | 756.46  | 43.114  | 40617  | 2 | 378.74  | -11.70 |
| P00924 ENO1_YEAST Enolase 1                                            | 13 |                      | IATAIEK                       | 330 | 7  | 5  | 50.72  | b6y3y5y6°y6                                         | 745.43  | 28.963  | 28546  | 2 | 373.22  | -17.52 |
| P00924 ENO1_YEAST Enolase 1                                            | 14 |                      | NVPLYK                        | 126 | 6  | 2  | 26.87  | b3y4                                                | 733.42  | 37.476  | 15142  | 1 | 733.42  | -4.24  |
| P00924 ENO1_YEAST Enolase 1                                            | 15 |                      | IGSEVYHNLK                    | 185 | 10 | 6  | 40.17  | b5b6°b6b8°b8y6                                      | 1159.59 | 94.497  | 3442   | 1 | 1159.59 | -17.16 |
| P00924 ENO1_YEAST Enolase 1                                            | 16 |                      | HLADLSK                       | 132 | 7  | 4  | 50.72  | b5y3y4y5                                            | 783.43  | 28.983  | 1863   | 2 | 392.22  | -6.15  |
| P00924 ENO1_YEAST Enolase 1                                            | 17 | Carbamidomethyl+C(5) | IGLDCASSEFFK                  | 243 | 12 | 3  | 22.3   | b4y3y6                                              | 1373.66 | 63.886  | 1655   | 2 | 687.33  | 12.44  |
| P00924 ENO1_YEAST Enolase 1                                            | 18 |                      | VNQIGTLSESIKAAQDSFAAGWGVMVSHR | 346 | 29 | 3  | 11.54  | b11y5y12                                            | 3059.51 | 87.148  | 3659   | 4 | 765.63  | -7.98  |
| P00924 ENO1_YEAST Enolase 1                                            | 19 |                      | TFAEALRIGSEVYHNLK             | 178 | 17 | 4  | 16.34  | b5b16y9°y9                                          | 1948.05 | 89.159  | 2630   | 3 | 650.02  | 8.84   |
| P00924 ENO1_YEAST Enolase 1                                            | 20 | Phosphoryl STY(12)   | AVDDFLISLDGTANK               | 88  | 15 | 3  | 24.18  | b10b11y12                                           | 1658.76 | 72.690  | 1760   | 3 | 553.59  | 3.09   |
| P00924 ENO1_YEAST Enolase 1                                            | 21 | Oxidation+M(17)      | SIVPSGASTGVHEALEMR            | 32  | 18 | 5  | 32.79  | b6b7b13y8y10                                        | 1856.89 | 60.183  | 24481  | 3 | 619.64  | -13.28 |
| P00924 ENO1_YEAST Enolase 1                                            | 22 | Oxidation+M(17)      | SIVPSGASTGVHEALEMRDGDGK       | 32  | 22 | 4  | 34.79  | y3y4y5°y5                                           | 2272.09 | 66.747  | 2007   | 3 | 758.03  | -1.07  |
| P00924 ENO1_YEAST Enolase 1                                            | 23 |                      | PSGASTGVHEALEMR               | 35  | 15 | 4  | 24.52  | b8°b8b9b13                                          | 1541.75 | 61.998  | 5208   | 2 | 771.38  | 7.21   |



|                                                        |    |                  |                         |     |    |    |        |                                                                   |         |        |        |   |         |        |
|--------------------------------------------------------|----|------------------|-------------------------|-----|----|----|--------|-------------------------------------------------------------------|---------|--------|--------|---|---------|--------|
| P0AA28 THIO_SALTY Thioredoxin-1                        | 1  |                  | MIAPILDEIADEYQGK        | 37  | 16 | 17 | 120.61 | b2b3b4b11y2y3*y3y4*y4y5y6y10y11°y11y13y14y16                      | 1805.91 | 94.397 | 225282 | 2 | 903.46  | 6.89   |
| P0AA28 THIO_SALTY Thioredoxin-1                        | 2  |                  | LNIDQNPGTAPK            | 58  | 12 | 25 | 150.8  | b2*b2b4*b4b5°b5*b5b6b10y2y3y5°y5y6°y6y7y8°y8y9°y9*y9y10*y10y11y12 | 1267.66 | 39.247 | 155934 | 2 | 634.33  | -3.95  |
| P0AA28 THIO_SALTY Thioredoxin-1                        | 3  |                  | GIPTLLLFK               | 74  | 9  | 10 | 74.98  | b2b3y1y2y3y4y5y6y7y9                                              | 1001.63 | 91.220 | 64493  | 2 | 501.32  | -12.80 |
| P0AA28 THIO_SALTY Thioredoxin-1                        | 4  |                  | IIHLTDDSFDTDVLK         | 4   | 15 | 5  | 43.96  | b3y5y6y7y12                                                       | 1731.86 | 72.198 | 20991  | 3 | 577.96  | -10.93 |
| P0AA28 THIO_SALTY Thioredoxin-1                        | 5  |                  | GQLKEFLDANLA            | 97  | 12 | 3  | 22.3   | b8b10y4                                                           | 1318.68 | 46.905 | 5237   | 2 | 659.84  | -14.72 |
| P0AA28 THIO_SALTY Thioredoxin-1                        | 6  | Oxidation+M(1)   | MIAPILDEIADEYQGK        | 37  | 16 | 3  | 17.18  | b13y11y13                                                         | 1821.91 | 88.257 | 7031   | 2 | 911.46  | 9.05   |
| P0A2A3 RL1_SALTY 50S ribosomal protein L1              | 1  |                  | VAVFTQGPNAEAAK          | 74  | 14 | 15 | 107.37 | b3b4b6b11y3y7y8*y8y9°y9*y9y10*y10y11y14                           | 1402.74 | 45.958 | 114822 | 2 | 701.87  | 2.26   |
| P0A2A3 RL1_SALTY 50S ribosomal protein L1              | 2  |                  | VVGQLGQVLGPR            | 122 | 12 | 14 | 100.22 | b1b2b4y1y2y3y4y5y6y7y8y10*y10y12                                  | 1222.72 | 59.751 | 87325  | 2 | 611.86  | -6.89  |
| P0A2A3 RL1_SALTY 50S ribosomal protein L1              | 3  |                  | VGTVTPNVAEAVK           | 141 | 13 | 17 | 119.52 | b2b3°b3b5°b5b7°b7b13y3y4y7y8y9y10y12°y12y13                       | 1284.71 | 48.760 | 85470  | 2 | 642.86  | -2.85  |
| P0A2A3 RL1_SALTY 50S ribosomal protein L1              | 4  |                  | AAGAELVGMEDLADQIK       | 88  | 17 | 7  | 32.8   | b3b6b12°b12y10y12°y12                                             | 1730.87 | 80.502 | 34773  | 2 | 865.94  | 6.42   |
| P0A2A3 RL1_SALTY 50S ribosomal protein L1              | 5  |                  | GATVLPHGTR              | 60  | 11 | 10 | 70.05  | b3°b3b4y2y4y5°y5y6y7y11                                           | 1065.57 | 30.210 | 17093  | 2 | 533.29  | -6.07  |
| P0A2A3 RL1_SALTY 50S ribosomal protein L1              | 6  |                  | FNESVDVAVNLGIDAR        | 37  | 16 | 5  | 28.37  | b9b13b14y5y16                                                     | 1718.87 | 77.743 | 3628   | 3 | 573.63  | 1.92   |
| P0A2A3 RL1_SALTY 50S ribosomal protein L1              | 7  |                  | ELATAK                  | 31  | 6  | 2  | 13.63  | b5°b5                                                             | 632.36  | 28.951 | 9824   | 1 | 632.36  | -4.44  |
| P0A2A3 RL1_SALTY 50S ribosomal protein L1              | 8  |                  | VSISTTMGAGVAVDQAGLSASAN | 211 | 23 | 4  | 13.06  | b7b15y15°y15                                                      | 2107.08 | 88.265 | 2571   | 2 | 1054.04 | 22.36  |
| P0A2A3 RL1_SALTY 50S ribosomal protein L1              | 9  |                  | KGEMNFDVVIASPDAMR       | 105 | 17 | 3  | 16.34  | b5b8y7                                                            | 1879.88 | 41.161 | 30980  | 3 | 627.30  | -12.66 |
| P0A2A3 RL1_SALTY 50S ribosomal protein L1              | 10 |                  | TVLPHGTR                | 62  | 9  | 0  | 2.42   |                                                                   | 937.51  | 30.207 | 16621  | 2 | 469.26  | -8.92  |
| P69226 IF1_SALTY Translation initiation factor IF-1    | 1  |                  | VELENGHVVTAHISGK        | 23  | 16 | 7  | 17.18  | b2°b2b9°b9y1y3y14                                                 | 1689.87 | 42.425 | 40572  | 3 | 563.96  | -14.66 |
| P69226 IF1_SALTY Translation initiation factor IF-1    | 2  |                  | AKEDNIEMQGTVLETLPNTMFR  | 1   | 22 | 17 | 85.37  | b3b6°b6b11b12°b12y3y4y6°y6y7*y7y9*y9y13y15y22                     | 2537.24 | 85.129 | 29444  | 3 | 846.42  | 0.48   |
| P69226 IF1_SALTY Translation initiation factor IF-1    | 3  |                  | VELENGHVVTAHISGKMR      | 23  | 18 | 4  | 24.85  | b6b8b14y9                                                         | 1977.05 | 82.428 | 1560   | 3 | 659.69  | 7.16   |
| P69226 IF1_SALTY Translation initiation factor IF-1    | 4  | Phosphoryl STY() | VELENGHVVTAHISGK        | 23  | 16 | 5  | 27.7   | b7b9°b9b12y4                                                      | 1769.84 | 72.198 | 2206   | 3 | 590.62  | -5.24  |
| P0A2C5 RBSB_SALTY D-ribose-binding periplasmic protein | 1  |                  | ILLINPTSDAVGNAVK        | 84  | 17 | 17 | 97.42  | b2b3b4b5b10b13y2y9y12°y12*y12y13*y13y14*y14y15y17                 | 1739.96 | 71.549 | 88773  | 2 | 870.48  | 3.72   |
| P0A2C5 RBSB_SALTY D-ribose-binding periplasmic protein | 2  |                  | LAATIAQLPDQIGAK         | 253 | 15 | 17 | 147.24 | b1b2b3b5°b5y3y4y5y6y7y8y9*y9y10y11y13y15                          | 1509.86 | 67.140 | 55834  | 2 | 755.44  | -0.49  |
| P0A2C5 RBSB_SALTY D-ribose-binding periplasmic protein | 3  |                  | IPVITLDR                | 107 | 8  | 5  | 49.36  | b3y4y5y6y8                                                        | 926.56  | 62.549 | 50202  | 2 | 463.78  | -12.25 |
| P0A2C5 RBSB_SALTY D-ribose-binding periplasmic protein | 4  |                  | ELANVQDLTVR             | 70  | 11 | 5  | 41.54  | b7y3y6y8y11                                                       | 1257.68 | 58.403 | 29582  | 2 | 629.34  | -3.69  |
| P0A2C5 RBSB_SALTY D-ribose-binding periplasmic protein | 5  |                  | VIELQGIAGTSAAR          | 150 | 14 | 14 | 92.15  | b1b2b3y1y5y6y7y9y10y11*y11y12°y12y14                              | 1385.77 | 59.703 | 28681  | 2 | 693.39  | -1.76  |

|                                                        |    |                      |                                      |     |    |    |       |                                          |         |         |        |   |         |        |
|--------------------------------------------------------|----|----------------------|--------------------------------------|-----|----|----|-------|------------------------------------------|---------|---------|--------|---|---------|--------|
| P0A2C5 RBSB_SALTY D-ribose-binding periplasmic protein | 6  |                      | ADVMVVGFDPDGEK                       | 231 | 16 | 5  | 37.92 | b11y4y7y10y11                            | 1636.76 | 64.414  | 25540  | 2 | 818.89  | 6.64   |
| P0A2C5 RBSB_SALTY D-ribose-binding periplasmic protein | 7  |                      | FNVLASQPADFDR                        | 178 | 13 | 14 | 82.04 | b2*b2b3*b3y1y2y4y6*y6y8y9y10y11y13       | 1479.73 | 67.149  | 25037  | 2 | 740.37  | 3.13   |
| P0A2C5 RBSB_SALTY D-ribose-binding periplasmic protein | 8  |                      | GLNVMQNLLTAHPDVQAVFAQN<br>DEMALGALR  | 193 | 31 | 10 | 18.81 | b2b4b13y1y2y4y9*y9y13y31                 | 3336.70 | 103.375 | 16102  | 3 | 1112.90 | 4.68   |
| P0A2C5 RBSB_SALTY D-ribose-binding periplasmic protein | 9  |                      | GVEVADK                              | 268 | 7  | 3  | 40.5  | y3y4y5                                   | 717.38  | 38.754  | 4439   | 1 | 717.38  | 5.53   |
| P0A2C5 RBSB_SALTY D-ribose-binding periplasmic protein | 10 |                      | IAGDYIAK                             | 135 | 8  | 6  | 49.36 | b4*b4b6b7*b7y6                           | 850.46  | 39.757  | 3614   | 2 | 425.73  | -9.76  |
| P0A2C5 RBSB_SALTY D-ribose-binding periplasmic protein | 11 |                      | ELANVQDLTVRGTK                       | 70  | 14 | 3  | 27.88 | b5b8b12                                  | 1543.86 | 89.730  | 19771  | 2 | 772.43  | 9.17   |
| P0A2C5 RBSB_SALTY D-ribose-binding periplasmic protein | 12 |                      | ADVMVVGFDPDGEKAVK                    | 231 | 19 | 5  | 49.93 | b3b4b5b6y12                              | 1934.95 | 60.923  | 8607   | 3 | 645.65  | -2.84  |
| P0A2C5 RBSB_SALTY D-ribose-binding periplasmic protein | 13 |                      | GTKILLINPTSDAVGNAVK                  | 81  | 20 | 4  | 22.52 | b4y9y10*y10                              | 2026.12 | 58.357  | 1965   | 3 | 676.04  | 0.60   |
| P0A2C5 RBSB_SALTY D-ribose-binding periplasmic protein | 14 | Phosphoryl STY(6)    | FNVLASQPADFDR                        | 178 | 13 | 4  | 32.35 | b10_H3PO4 b10y3y6y7                      | 1559.70 | 74.734  | 13168  | 3 | 520.57  | 11.27  |
| P0A2C5 RBSB_SALTY D-ribose-binding periplasmic protein | 15 | Phosphoryl STY(25)   | LGYNLVVLD SQNNPAKELANVQ<br>DLTVR     | 54  | 27 | 5  | 22.57 | b24y4*y4y11y12                           | 3063.53 | 86.308  | 3602   | 5 | 613.51  | -5.18  |
| P0A2C5 RBSB_SALTY D-ribose-binding periplasmic protein | 16 | Oxidation+M(4)       | ADVMVVGFDPDGEK                       | 231 | 16 | 3  | 17.18 | b6b10y4                                  | 1652.77 | 85.098  | 1605   | 3 | 551.60  | 14.25  |
| P0A297 RL10_SALTY 50S ribosomal protein L10            | 1  |                      | LATLPTYEEAIAR                        | 125 | 13 | 16 | 83.51 | b2b3*b3b4*b4b12b13y1y2y5y8*y8y9y10y11y13 | 1447.78 | 65.935  | 95791  | 2 | 724.39  | -0.51  |
| P0A297 RL10_SALTY 50S ribosomal protein L10            | 2  |                      | AAAFEGELIPASQIDR                     | 109 | 16 | 11 | 72.96 | b7b9y1y5y7y8y9y11y12*y12y16              | 1687.87 | 69.449  | 91877  | 2 | 844.44  | 3.69   |
| P0A297 RL10_SALTY 50S ribosomal protein L10            | 3  | Carbamidomethyl+C(9) | VVEGTQFECLKDTFVGPTLIAYSM<br>EHPGAAAR | 62  | 32 | 5  | 18.31 | b8b11y6y8y13                             | 3494.69 | 92.969  | 67723  | 4 | 874.43  | -4.19  |
| P0A297 RL10_SALTY 50S ribosomal protein L10            | 4  |                      | DTFVGPTLIAYSM EHPGAAAR               | 73  | 21 | 6  | 13.89 | b2*b2b5y1y9y11                           | 2204.11 | 62.761  | 59091  | 4 | 551.78  | 12.85  |
| P0A297 RL10_SALTY 50S ribosomal protein L10            | 5  |                      | GALSAVVADSR                          | 20  | 11 | 11 | 71.01 | b3y1y2y4y5y6*y6y7y8*y8y11                | 1045.56 | 48.856  | 55514  | 2 | 523.29  | 0.82   |
| P0A297 RL10_SALTY 50S ribosomal protein L10            | 6  |                      | QAIVAEVSEVAK                         | 8   | 12 | 11 | 49.74 | b2b3*b3b12*b12y2y3y8y9y10y12             | 1243.68 | 57.938  | 28924  | 2 | 622.34  | -6.09  |
| P0A297 RL10_SALTY 50S ribosomal protein L10            | 7  |                      | AGREAGVYMR                           | 43  | 10 | 6  | 52.61 | b6b8y3y7y8y10                            | 1109.56 | 46.844  | 11542  | 2 | 555.28  | 6.27   |
| P0A297 RL10_SALTY 50S ribosomal protein L10            | 8  |                      | EAGVYMR                              | 46  | 7  | 6  | 50.72 | b5*b5y3y4y5y7                            | 825.39  | 32.558  | 6720   | 2 | 413.20  | -8.43  |
| P0A297 RL10_SALTY 50S ribosomal protein L10            | 9  |                      | LMATMK                               | 138 | 6  | 1  | 13.63 | y5                                       | 694.36  | 42.570  | 2561   | 1 | 694.36  | 1.58   |
| P0A297 RL10_SALTY 50S ribosomal protein L10            | 10 |                      | LATLPTYEEAIARLMATMK                  | 125 | 19 | 4  | 14.96 | b10y6y18*y18                             | 2123.09 | 58.492  | 127734 | 3 | 708.37  | -14.14 |
| P0A297 RL10_SALTY 50S ribosomal protein L10            | 11 |                      | ALNLQDKQAIVA EVSEVAK                 | 1   | 19 | 4  | 25.9  | b9y3y8y9                                 | 2026.10 | 72.143  | 19576  | 3 | 676.04  | -7.23  |
| P0A297 RL10_SALTY 50S ribosomal protein L10            | 12 | Carbamidomethyl+C(9) | VVEGTQFECLKDTFVGPTLIAYSM<br>EHPGAAAR | 62  | 32 | 4  | 11.15 | b6b10*b10y9                              | 3494.68 | 64.444  | 8272   | 4 | 874.43  | -8.45  |
| P0A297 RL10_SALTY 50S ribosomal protein L10            | 13 |                      | GVTVDKMTCLR                          | 31  | 11 | 5  | 35.34 | b7b9y4y7*y7                              | 1248.64 | 68.599  | 5152   | 2 | 624.83  | -14.76 |
| P0A297 RL10_SALTY 50S ribosomal protein L10            | 14 |                      | AGREAGVYMR                           | 43  | 10 | 6  | 54.37 | b5*b5b6b8y7y8                            | 1109.54 | 47.385  | 1666   | 1 | 1109.54 | -12.10 |
| P0A297 RL10_SALTY 50S ribosomal protein L10            | 15 | Phosphoryl STY(3)    | LATLPTYEEAIAR                        | 125 | 13 | 3  | 29.91 | y6y9y11_H3PO4 y11                        | 1527.73 | 77.631  | 6206   | 3 | 509.91  | -4.79  |
| P0A297 RL10_SALTY 50S ribosomal protein L10            | 16 | Oxidation+M(2)       | LMATMK EASAGK                        | 138 | 12 | 3  | 26.28 | b11y10y11                                | 1253.61 | 31.644  | 6750   | 2 | 627.31  | -7.50  |
| P0A297 RL10_SALTY 50S ribosomal protein L10            | 17 | Oxidation+M(9)       | AGREAGVYMR                           | 43  | 10 | 4  | 26.94 | b4b6y9*y9                                | 1125.56 | 110.157 | 2443   | 1 | 1125.56 | 7.70   |
| P0A1V4 KAD_SALTY Adenylate kinase                      | 1  |                      | VDGTQAVADV R                         | 195 | 11 | 8  | 36.77 | b10*b10y1y2y3y4y9y11                     | 1130.58 | 37.361  | 56729  | 2 | 565.79  | -2.70  |

|                                        |    |                      |                            |     |    |    |        |                                                                |         |         |        |   |         |        |
|----------------------------------------|----|----------------------|----------------------------|-----|----|----|--------|----------------------------------------------------------------|---------|---------|--------|---|---------|--------|
| P0A1V4 KAD_SALTY Adenylate kinase      | 2  |                      | LVEYHQMTAPLIGYYQK          | 167 | 17 | 15 | 75.43  | b7b9°b9*b9b11b12*b12y1y2y3y5y6y10y12*y12                       | 2054.02 | 69.882  | 51857  | 3 | 685.35  | -8.08  |
| P0A1V4 KAD_SALTY Adenylate kinase      | 3  |                      | IILLGAPGAGK                | 2   | 11 | 11 | 100.49 | b2b3y2y3y4y5y6y7y8y9y11                                        | 1009.63 | 61.799  | 44576  | 2 | 505.32  | -7.07  |
| P0A1V4 KAD_SALTY Adenylate kinase      | 4  |                      | YGIPQISTGDMLR              | 23  | 13 | 15 | 120.77 | b2b6b11b12y1y3y6y7y8y9°y9y10y12°y12y13                         | 1450.74 | 73.422  | 36909  | 2 | 725.87  | 2.52   |
| P0A1V4 KAD_SALTY Adenylate kinase      | 5  |                      | NGFLLDGFPR                 | 78  | 10 | 7  | 55.62  | b1b2b3b7y4y5y6                                                 | 1135.58 | 81.385  | 23242  | 2 | 568.29  | -8.49  |
| P0A1V4 KAD_SALTY Adenylate kinase      | 6  |                      | LVEYHQMTAPLIGYYQKEAEGN TK  | 167 | 25 | 4  | 21.96  | b8b9°b9y6                                                      | 2854.38 | 98.040  | 9043   | 3 | 952.13  | -10.61 |
| P0A1V4 KAD_SALTY Adenylate kinase      | 7  |                      | FNPPK                      | 136 | 5  | 2  | 26.46  | b3y4                                                           | 602.32  | 56.441  | 28997  | 1 | 602.32  | -9.73  |
| P0A1V4 KAD_SALTY Adenylate kinase      | 8  |                      | TIPQADAMK                  | 88  | 9  | 5  | 45     | b5b7°b7y4y5                                                    | 974.49  | 68.079  | 6274   | 2 | 487.75  | -12.15 |
| P0A1V4 KAD_SALTY Adenylate kinase      | 9  |                      | GTQAQFIMEK                 | 13  | 10 | 6  | 39.38  | b3*b3b6y3y7*y7                                                 | 1152.55 | 35.989  | 2607   | 2 | 576.78  | -20.23 |
| P0A1V4 KAD_SALTY Adenylate kinase      | 10 |                      | IILLGAPGAGKGTQAQFIMEK      | 2   | 21 | 4  | 21.72  | b3y12y14y17                                                    | 2143.18 | 73.355  | 13189  | 3 | 715.07  | -5.24  |
| P0A1V4 KAD_SALTY Adenylate kinase      | 11 |                      | GTQAQFIMEKYGIPQISTGDMLR    | 13  | 23 | 5  | 29.51  | b3b4b10b15y9                                                   | 2584.26 | 76.311  | 11913  | 3 | 862.09  | -10.30 |
| P0A1V4 KAD_SALTY Adenylate kinase      | 12 |                      | LVEYHQMTAPLIGYYQKEAEGN TK  | 167 | 25 | 12 | 61     | b3b6°b6b9°b9*y9y5y6y7*y7y10y11                                 | 2854.38 | 136.493 | 3271   | 2 | 1427.69 | -9.84  |
| P0A1V4 KAD_SALTY Adenylate kinase      | 13 |                      | VYHVKFNPPK                 | 131 | 10 | 3  | 33.93  | b6b8b9                                                         | 1228.69 | 47.683  | 2549   | 2 | 614.85  | 4.77   |
| P0A1V4 KAD_SALTY Adenylate kinase      | 14 | Carbamidomethyl+C(6) | IAQEDCRNGFLLDGFPR          | 71  | 17 | 3  | 16.34  | b3y5y12                                                        | 2007.98 | 94.524  | 2211   | 3 | 670.00  | 6.08   |
| Q8ZRC9 YAJQ_SALTY UPF0234 protein yajQ | 1  |                      | VLSESDFQVNQLLDILR          | 49  | 17 | 5  | 23.74  | b2y3y5y13y17                                                   | 1989.08 | 105.440 | 32052  | 2 | 995.05  | 9.57   |
| Q8ZRC9 YAJQ_SALTY UPF0234 protein yajQ | 2  |                      | GIEGASLDVPDEFVHSGK         | 72  | 18 | 19 | 85.76  | b2b4b5°b5b7°b7b9°b9b11b12y2y6y9°y9y10y11°y12°y12y18            | 1856.89 | 67.685  | 30377  | 3 | 619.63  | -6.84  |
| Q8ZRC9 YAJQ_SALTY UPF0234 protein yajQ | 3  |                      | GGDLGQPFQFK                | 148 | 11 | 6  | 38.35  | b2b3b4y5y7y11                                                  | 1193.59 | 64.334  | 18517  | 2 | 597.30  | -0.20  |
| Q8ZRC9 YAJQ_SALTY UPF0234 protein yajQ | 4  |                      | GVEATIELNDANK              | 33  | 13 | 4  | 20.67  | b3b5°b5y9                                                      | 1373.68 | 51.395  | 66435  | 3 | 458.57  | -7.38  |
| Q8ZRC9 YAJQ_SALTY UPF0234 protein yajQ | 5  |                      | PSFDIVSEVDLQEAR            | 1   | 15 | 9  | 53.67  | b12°b12b13y3°y3y7°y7y8y10                                      | 1704.87 | 85.120  | 6219   | 2 | 852.94  | 17.76  |
| Q8ZRC9 YAJQ_SALTY UPF0234 protein yajQ | 6  |                      | GIEGASLDVPDEFVHSGKTWYVE AK | 72  | 25 | 6  | 35.6   | b4b8b10°b10b11b14                                              | 2734.35 | 136.486 | 2158   | 2 | 1367.68 | 3.30   |
| Q8ZRC9 YAJQ_SALTY UPF0234 protein yajQ | 7  | Phosphoryl STY(5)    | QGIESAVQKK                 | 99  | 10 | 4  | 26.94  | b7y4y7°y7                                                      | 1167.55 | 39.706  | 4227   | 3 | 389.86  | -14.01 |
| Q8ZRC9 YAJQ_SALTY UPF0234 protein yajQ | 8  | Oxidation+M(1)       | MPSFDIVSEVDLQEAR           | 0   | 16 | 3  | 17.18  | b10y4y9                                                        | 1851.90 | 81.582  | 5727   | 4 | 463.73  | 9.56   |
| Q8ZRC9 YAJQ_SALTY UPF0234 protein yajQ | 9  |                      | EGASLDVPDEFVHSGK           | 74  | 16 | 1  | 7.33   | b7                                                             | 1686.81 | 67.679  | 2811   | 2 | 843.91  | 5.72   |
| P0A1H3 EFG_SALTY Elongation factor G   | 1  |                      | IATDPFVGNLTFFR             | 323 | 14 | 13 | 72.9   | b2b4b14y4y6*y6y7*y7y10y11°y11y12y14                            | 1597.84 | 93.982  | 102765 | 2 | 799.42  | 1.60   |
| P0A1H3 EFG_SALTY Elongation factor G   | 2  |                      | VYSGVVNSGDTVLSVK           | 337 | 17 | 21 | 135.84 | b2b5b6b7b12°b12b13b15°b15b17y4y5y10*y10y11y12*y12y14y15*y15y17 | 1737.91 | 62.861  | 80918  | 2 | 869.46  | 2.32   |
| P0A1H3 EFG_SALTY Elongation factor G   | 3  |                      | SGPLAGYPVVDLGV             | 562 | 15 | 16 | 124.31 | b2b3°b3b5°b5b7°b7y3y4y5y8y9y10y11y12y15                        | 1499.82 | 77.338  | 62675  | 2 | 750.41  | 0.49   |
| P0A1H3 EFG_SALTY Elongation factor G   | 4  |                      | IGEVHDDAATMDWMEQEQR        | 39  | 20 | 13 | 77.77  | b5°b5b8b10b12y4y5°y5y6*y6y7y9y20                               | 2332.00 | 62.837  | 58967  | 3 | 778.00  | -0.73  |

|                                      |    |                                      |                                       |     |    |    |       |                                        |         |         |       |   |         |        |
|--------------------------------------|----|--------------------------------------|---------------------------------------|-----|----|----|-------|----------------------------------------|---------|---------|-------|---|---------|--------|
| P0A1H3 EFG_SALTY Elongation factor G | 5  |                                      | HASDDEPFSSALAFK                       | 309 | 14 | 6  | 45.47 | b2b4b5b6b12y3                          | 1534.73 | 70.919  | 53847 | 2 | 767.87  | 5.17   |
| P0A1H3 EFG_SALTY Elongation factor G | 6  |                                      | IHAEVPLSEMGYATQLR                     | 653 | 18 | 13 | 86.21 | b2b3b4b5b9°b9y2y3y5y6y7y8°y8           | 2062.03 | 90.199  | 53146 | 3 | 688.01  | -6.51  |
| P0A1H3 EFG_SALTY Elongation factor G | 7  |                                      | GQYGHVVIDMYPLEGNSPK                   | 512 | 20 | 11 | 45.91 | b2°b2b5b8b11b12y6*y6y9°y9y12           | 2201.06 | 70.860  | 48971 | 3 | 734.36  | -5.32  |
| P0A1H3 EFG_SALTY Elongation factor G | 8  |                                      | GQESEVTGVK                            | 643 | 10 | 6  | 33.93 | b2y1y3y4y8y10                          | 1033.51 | 26.279  | 47596 | 2 | 517.26  | -8.74  |
| P0A1H3 EFG_SALTY Elongation factor G | 9  |                                      | EFNVEANVGKPVAYR                       | 475 | 16 | 8  | 84.04 | y3y4y5y6y8y10y12y16                    | 1820.91 | 54.056  | 43127 | 3 | 607.64  | -9.12  |
| P0A1H3 EFG_SALTY Elongation factor G | 10 |                                      | VEVETPEENTGDVIGDLSR                   | 618 | 19 | 13 | 61.05 | b1b2b5°b5b8b9y3y5y6y11*y11y14y19       | 2059.00 | 67.647  | 26934 | 2 | 1030.01 | 10.08  |
| P0A1H3 EFG_SALTY Elongation factor G | 11 |                                      | AKPVLLEPIMK                           | 607 | 11 | 4  | 36.09 | b2y4y6y9                               | 1238.75 | 63.716  | 21924 | 2 | 619.88  | -0.89  |
| P0A1H3 EFG_SALTY Elongation factor G | 12 |                                      | YDDAPNNVAQVIEAR                       | 686 | 16 | 6  | 27.7  | b1b3y8y10y12y16                        | 1745.85 | 66.005  | 21685 | 2 | 873.43  | 4.75   |
| P0A1H3 EFG_SALTY Elongation factor G | 13 | Carbamidomethyl+C(9)                 | DVTTGDTLCDPENPIILER                   | 389 | 19 | 4  | 25.9  | b3y3y10y11                             | 2158.06 | 71.386  | 21394 | 2 | 1079.53 | 11.43  |
| P0A1H3 EFG_SALTY Elongation factor G | 14 | Carbamidomethyl+C(11)                | VLNNEILVTCGSAFK                       | 255 | 16 | 6  | 37.36 | b5*b5b6*b6y7y8                         | 1777.96 | 79.963  | 20302 | 2 | 889.48  | 2.61   |
| P0A1H3 EFG_SALTY Elongation factor G | 15 | Carbamidomethyl+C(20)                | AGDIAAAIGLKDVTTGDTLCDPENPIILER        | 378 | 30 | 12 | 63.3  | b7b9b17b19b27y1y3y9y10y11°y11y13       | 3138.61 | 85.866  | 18213 | 3 | 1046.88 | 4.28   |
| P0A1H3 EFG_SALTY Elongation factor G | 16 |                                      | LGANPVPLQLAIGAEEGFTGVVDLVK            | 161 | 26 | 4  | 21.93 | b4y11y12y26                            | 2607.43 | 120.742 | 14673 | 3 | 869.81  | -5.34  |
| P0A1H3 EFG_SALTY Elongation factor G | 17 |                                      | GVQAMLDIVIDYLPSPVDVPAINGILDDGDKDTPAER | 273 | 36 | 14 | 56.31 | b2b3b4b7b12°b12b13y5y7°y7y10y17°y17y23 | 3764.93 | 122.918 | 12862 | 3 | 1255.65 | 6.16   |
| P0A1H3 EFG_SALTY Elongation factor G | 18 |                                      | GGVIPGEYIPAVDK                        | 541 | 14 | 9  | 72.23 | b2b3b4b5b6y7y9y10y14                   | 1414.76 | 66.192  | 9112  | 2 | 707.89  | 4.92   |
| P0A1H3 EFG_SALTY Elongation factor G | 19 |                                      | YLGGEELTEEEIK                         | 236 | 13 | 4  | 34.48 | b7b8y6y11                              | 1509.73 | 58.462  | 5477  | 2 | 755.37  | 0.40   |
| P0A1H3 EFG_SALTY Elongation factor G | 20 |                                      | GITITSAATTAFWSGMAK                    | 59  | 18 | 3  | 34.52 | y8y9y10                                | 1813.92 | 70.494  | 2602  | 3 | 605.31  | 4.11   |
| P0A1H3 EFG_SALTY Elongation factor G | 21 |                                      | VVGQIK                                | 153 | 6  | 1  | 13.63 | b4                                     | 643.41  | 45.616  | 12775 | 1 | 643.41  | -4.55  |
| P0A1H3 EFG_SALTY Elongation factor G | 22 |                                      | IAFVNK                                | 137 | 6  | 3  | 29.88 | y3*y3y5                                | 691.41  | 40.727  | 8046  | 2 | 346.21  | -1.85  |
| P0A1H3 EFG_SALTY Elongation factor G | 23 |                                      | INIIDTPGHVDFTIEVER                    | 83  | 18 | 3  | 15.6  | b3b11y10                               | 2068.06 | 67.059  | 4021  | 4 | 517.77  | -3.31  |
| P0A1H3 EFG_SALTY Elongation factor G | 24 |                                      | LHFGSYHDVDSSELAFK                     | 577 | 17 | 4  | 16.34 | b3y6°y6y8                              | 1951.93 | 50.586  | 2522  | 3 | 651.32  | 8.13   |
| P0A1H3 EFG_SALTY Elongation factor G | 25 | Carbamidomethyl+C(10)                | VLDGAVMVYCAVGGVQPQSETVWR              | 104 | 24 | 4  | 16.89 | b6b17y14y21                            | 2621.27 | 76.322  | 2000  | 3 | 874.43  | -6.43  |
| P0A1H3 EFG_SALTY Elongation factor G | 26 |                                      | QYEPHR                                | 77  | 6  | 1  | 13.63 | b3                                     | 829.39  | 68.687  | 1689  | 1 | 829.39  | -11.11 |
| P0A1H3 EFG_SALTY Elongation factor G | 27 |                                      | YLGGEELTEEEIKQALR                     | 236 | 17 | 5  | 34.05 | b3b4b13y11y15                          | 1977.99 | 74.160  | 77801 | 3 | 660.00  | -9.07  |
| P0A1H3 EFG_SALTY Elongation factor G | 28 |                                      | ASYTMEFLKYDDAPNNVAQVIEAR              | 677 | 25 | 9  | 65.25 | b8b9b13y5y6y7y8*y8y12                  | 2816.36 | 85.041  | 53205 | 3 | 939.46  | 2.34   |
| P0A1H3 EFG_SALTY Elongation factor G | 29 |                                      | HASDDEPFSSALAFKIATDPFVGNLTFFR         | 309 | 28 | 3  | 11.71 | b4b14y11                               | 3113.58 | 88.996  | 16846 | 4 | 779.15  | 13.49  |
| P0A1H3 EFG_SALTY Elongation factor G | 30 |                                      | MEFPEPVISIAVEPKTK                     | 408 | 17 | 3  | 23.74 | b4b12b14                               | 1915.03 | 69.809  | 3523  | 2 | 958.02  | 1.59   |
| P0A1H3 EFG_SALTY Elongation factor G | 31 | Phosphoryl STY(16)                   | REFNVEANVGKPVAYREAIR                  | 474 | 21 | 5  | 23.54 | b6°b6b14b15°b15                        | 2526.23 | 82.493  | 44319 | 2 | 1263.62 | -7.92  |
| P0A1H3 EFG_SALTY Elongation factor G | 32 | Carbamidomethyl+C(10);Oxidation+M(7) | VLDGAVMVYCAVGGVQPQSETVWR              | 104 | 24 | 5  | 28.43 | b5b7b13b16y11                          | 2637.27 | 95.450  | 12672 | 3 | 879.76  | -2.41  |

|                                                 |    |                                                |                                      |     |    |    |        |                                                                      |         |         |        |   |         |        |
|-------------------------------------------------|----|------------------------------------------------|--------------------------------------|-----|----|----|--------|----------------------------------------------------------------------|---------|---------|--------|---|---------|--------|
| O33921 AGP_SALTY Glucose-1-phohatase            | 1  |                                                | TPIGGQLVFQR                          | 335 | 11 | 11 | 67.04  | b2°b2b4b7y3*y3y4y8*y8y9y11                                           | 1215.68 | 62.112  | 110276 | 2 | 608.34  | -3.21  |
| O33921 AGP_SALTY Glucose-1-phohatase            | 2  |                                                | MGTMDPTFNPVITDDSAAFR                 | 141 | 20 | 13 | 78.51  | b2b3b5°b5y2y3y5y6y7y8y12y15y20                                       | 2186.01 | 79.269  | 73484  | 2 | 1093.51 | 11.62  |
| O33921 AGP_SALTY Glucose-1-phohatase            | 3  |                                                | IEYVYQSAR                            | 358 | 9  | 11 | 104.45 | b2b3b6b7y3y5y6y7y8°y8y9                                              | 1128.57 | 43.248  | 54961  | 2 | 564.79  | -1.73  |
| O33921 AGP_SALTY Glucose-1-phohatase            | 4  | Carbamidomethyl+C(14)                          | EWLVAQGLIPSGECPADTVYAY<br>ANSLQR     | 87  | 29 | 12 | 40.78  | b3°b3b5°b5b9y2y5°y5y6y9y13y20                                        | 3205.59 | 94.617  | 46737  | 3 | 1069.20 | 7.08   |
| O33921 AGP_SALTY Glucose-1-phohatase            | 5  | Carbamidomethyl+C(3)                           | HQCSLIDAK                            | 199 | 9  | 7  | 45     | b6*b6b7y2y7y8y9                                                      | 1071.52 | 32.037  | 44105  | 2 | 536.27  | -2.05  |
| O33921 AGP_SALTY Glucose-1-phohatase            | 6  |                                                | DTFSANYQQEPGVQGPLK                   | 208 | 18 | 7  | 40.28  | b4b10b13y5y8y13y18                                                   | 1978.97 | 57.309  | 43268  | 2 | 989.99  | 7.34   |
| O33921 AGP_SALTY Glucose-1-phohatase            | 7  | Carbamidomethyl+C(14)                          | LLEQITHYQDSPCK                       | 182 | 15 | 5  | 43.73  | y3y4y9y10y15                                                         | 1818.85 | 52.138  | 38654  | 3 | 606.95  | -13.02 |
| O33921 AGP_SALTY Glucose-1-phohatase            | 8  |                                                | NGYQDSLFTSPTVAR                      | 266 | 15 | 7  | 29.48  | b3y1y5y11°y11y13y15                                                  | 1655.81 | 63.727  | 37983  | 2 | 828.41  | 2.95   |
| O33921 AGP_SALTY Glucose-1-phohatase            | 9  |                                                | VGNSLVDAFTLQYYEGFPMDDQVA<br>WGGIHTDR | 226 | 31 | 6  | 21.84  | b7y4y6°y6y7°y7                                                       | 3486.67 | 105.194 | 32072  | 3 | 1162.90 | 8.33   |
| O33921 AGP_SALTY Glucose-1-phohatase            | 10 |                                                | APLANNGSVLAQSTPNAWPAWD<br>VPGGQLTTK  | 43  | 31 | 15 | 71.13  | b2b3b4b8b9°b9b10*b10b14b18y3y8y9y13y31                               | 3161.61 | 84.422  | 26489  | 3 | 1054.54 | 3.24   |
| O33921 AGP_SALTY Glucose-1-phohatase            | 11 |                                                | SQLHLDSEYK                           | 172 | 10 | 9  | 52.61  | b1b2b3*b3b7b8y6y8y10                                                 | 1219.59 | 40.935  | 25182  | 2 | 610.30  | -1.00  |
| O33921 AGP_SALTY Glucose-1-phohatase            | 12 |                                                | GGVLEVYMGHYTR                        | 74  | 13 | 5  | 34.11  | b3y5y7y10y13                                                         | 1481.70 | 64.245  | 22001  | 3 | 494.57  | -12.77 |
| O33921 AGP_SALTY Glucose-1-phohatase            | 13 | Carbamidomethyl+C(14)                          | LLEQITHYQDSPCKEK                     | 182 | 17 | 4  | 34.53  | b2y5y6y7                                                             | 2075.99 | 48.410  | 18243  | 3 | 692.67  | -7.53  |
| O33921 AGP_SALTY Glucose-1-phohatase            | 14 |                                                | VTVLVGHDNSIASLLTALDFKPYQ<br>LHDQYER  | 304 | 31 | 24 | 176.99 | b4b9b10*b10b11*b11b12b13°b13b15y4°y4*y4y5y6y7y9y10y12y14y15y16y17y20 | 3542.77 | 96.707  | 165478 | 5 | 709.36  | -16.19 |
| O33921 AGP_SALTY Glucose-1-phohatase            | 15 |                                                | NAEALTLK                             | 370 | 8  | 4  | 33.12  | b6*b6y6y7                                                            | 859.48  | 41.721  | 44437  | 2 | 430.24  | -11.01 |
| O33921 AGP_SALTY Glucose-1-phohatase            | 16 | Carbamidomethyl+C(16)                          | TVATAQFFITGAFPGCDIPVHHQE<br>K        | 116 | 25 | 3  | 12.42  | b7y9y13                                                              | 2771.42 | 101.294 | 10358  | 3 | 924.48  | 19.56  |
| O33921 AGP_SALTY Glucose-1-phohatase            | 17 |                                                | NVAAPLVK                             | 281 | 8  | 3  | 40.9   | y3y4y5                                                               | 811.50  | 40.698  | 4060   | 1 | 811.50  | -6.39  |
| O33921 AGP_SALTY Glucose-1-phohatase            | 18 | Carbamidomethyl+C(2);<br>Carbamidomethyl+C(10) | GCPVDANGFCPLDKFDNMNTA<br>AK          | 389 | 24 | 8  | 39.49  | b4y3y8°y8y18y20y22°y22                                               | 2641.19 | 79.266  | 92406  | 3 | 881.07  | 1.76   |
| O33921 AGP_SALTY Glucose-1-phohatase            | 19 | Carbamidomethyl+C(8);<br>Carbamidomethyl+C(16) | VTLELKGPCVDANGFCPLDK                 | 383 | 20 | 5  | 23.81  | y6°y6y8y9°y9                                                         | 2233.08 | 68.586  | 84649  | 3 | 745.03  | -7.33  |
| O33921 AGP_SALTY Glucose-1-phohatase            | 20 |                                                | LKNGYQDSLFTSPTVAR                    | 264 | 17 | 13 | 104.69 | b7b9b10*b10b14y3y4y5y6y7°y7y8°y8                                     | 1896.96 | 59.313  | 42311  | 3 | 632.99  | -10.94 |
| O33921 AGP_SALTY Glucose-1-phohatase            | 21 |                                                | WHDGNANRDLMK                         | 346 | 12 | 7  | 49.74  | b10y6y9y10y11°y11*y11                                                | 1456.68 | 83.009  | 2653   | 2 | 728.84  | 4.44   |
| O33921 AGP_SALTY Glucose-1-phohatase            | 22 | Phosphoryl STY(29)                             | APLANNGSVLAQSTPNAWPAWD<br>VPGGQLTTK  | 43  | 31 | 6  | 24.45  | b7*b7b28y4y8y9                                                       | 3241.59 | 109.328 | 1816   | 4 | 811.15  | 10.47  |
| O33921 AGP_SALTY Glucose-1-phohatase            | 23 | Oxidation+M(8)                                 | GGVLEVYMGHYTR                        | 74  | 13 | 3  | 20.67  | b6y4y11                                                              | 1497.71 | 136.574 | 4322   | 1 | 1497.71 | -3.91  |
| P0A2M5 UPP_SALTY Uracil phohoribosyltransferase | 1  |                                                | VLVLVAAPEGIAALEK                     | 155 | 16 | 11 | 119.85 | b2b3b4b5b6b7y8y9y10y11y12                                            | 1592.97 | 86.794  | 26301  | 2 | 796.99  | 4.90   |
| P0A2M5 UPP_SALTY Uracil phohoribosyltransferase | 2  |                                                | AGLGMMEGVLENVPSAR                    | 78  | 17 | 11 | 81.67  | b4b13b16y2y3y4y5y7y10y12y17                                          | 1730.87 | 82.563  | 26062  | 2 | 865.94  | 7.41   |
| P0A2M5 UPP_SALTY Uracil phohoribosyltransferase | 3  |                                                | ITVVPILR                             | 70  | 8  | 5  | 54.13  | y4y5y6y7y8                                                           | 910.60  | 70.429  | 15706  | 2 | 455.80  | -14.75 |
| P0A2M5 UPP_SALTY Uracil phohoribosyltransferase | 4  |                                                | VTIEGWNGPVEIDQIK                     | 51  | 16 | 4  | 23.72  | b1b6y11y12                                                           | 1797.93 | 75.161  | 1872   | 3 | 599.98  | -5.64  |

|                                                  |    |                       |                                                   |     |    |    |        |                                               |         |         |        |   |         |        |
|--------------------------------------------------|----|-----------------------|---------------------------------------------------|-----|----|----|--------|-----------------------------------------------|---------|---------|--------|---|---------|--------|
| P0A2M5 UPP_SALTY Uracil phohoribosyltransferase  | 5  |                       | LVSNI DER                                         | 116 | 8  | 3  | 33.12  | b6y6y7                                        | 945.49  | 33.411  | 27575  | 2 | 473.25  | -9.30  |
| P0A2M5 UPP_SALTY Uracil phohoribosyltransferase  | 6  |                       | ELASEVGSLLTYEATADLETEK                            | 29  | 22 | 3  | 13.45  | b4b6y6                                        | 2369.21 | 109.967 | 2986   | 2 | 1185.11 | 19.06  |
| P0A2M5 UPP_SALTY Uracil phohoribosyltransferase  | 7  |                       | AHPDVELY TASIDQGLNEHG YIIP<br>GLGDAGDKIFGTK       | 171 | 37 | 4  | 10.87  | b5b12y14°y14                                  | 3911.94 | 89.499  | 32015  | 4 | 978.74  | -0.31  |
| P0A2M5 UPP_SALTY Uracil phohoribosyltransferase  | 8  | Phosphoryl STY(14)    | FRELASEVGSLLTYEATADLETEK                          | 27  | 24 | 3  | 22.02  | b7y9y10                                       | 2752.32 | 98.840  | 2697   | 3 | 918.11  | 12.06  |
| P67093 UG_SALTY Universal stress protein G       | 1  |                       | HATLPVLVVR                                        | 132 | 10 | 6  | 43.18  | b2b3y1y7y8y9                                  | 1104.68 | 60.839  | 98398  | 2 | 552.85  | -4.97  |
| P67093 UG_SALTY Universal stress protein G       | 2  |                       | NPSITTHLLGSNASSVVR                                | 114 | 18 | 12 | 52.82  | b2*b2y2y4y5y9y10*y10y11°y11y18*y18            | 1852.97 | 59.200  | 70783  | 3 | 618.33  | -11.59 |
| P67093 UG_SALTY Universal stress protein G       | 3  |                       | TIIMPVDVFEMELSDK                                  | 3   | 16 | 11 | 84.15  | b2b3b4b7y3y4y6y12y13y14y16                    | 1866.93 | 105.035 | 68758  | 2 | 933.97  | 6.21   |
| P67093 UG_SALTY Universal stress protein G       | 4  |                       | LQTMVGHF SIDPSR                                   | 69  | 14 | 8  | 58.7   | b4*b4y3y4y6y11°y11y12                         | 1587.77 | 64.204  | 106562 | 3 | 529.93  | -15.91 |
| P67093 UG_SALTY Universal stress protein G       | 5  |                       | FAADVR                                            | 50  | 6  | 1  | 13.63  | b3                                            | 678.35  | 75.997  | 5748   | 1 | 678.35  | -3.33  |
| P67093 UG_SALTY Universal stress protein G       | 6  |                       | HAEFLAQDGV IHLHLVLP GSAS<br>MSLHRFAADVR           | 22  | 34 | 4  | 10.99  | b18y6y11°y11                                  | 3722.90 | 85.994  | 12823  | 4 | 931.48  | -8.46  |
| P67093 UG_SALTY Universal stress protein G       | 7  |                       | MYKTIIMPVDVFEMELSDK                               | 0   | 19 | 3  | 14.96  | b3y7y11                                       | 2289.11 | 99.464  | 2655   | 3 | 763.71  | -5.01  |
| P67093 UG_SALTY Universal stress protein G       | 8  |                       | FEHLQHEAETRLQTMVGHF SIDP<br>SR                    | 57  | 26 | 4  | 22.83  | b7y9y10y12                                    | 3094.52 | 78.524  | 1801   | 3 | 1032.18 | 14.28  |
| P0A1W6 LIVK_SALTY Leucine-ecific-binding protein | 1  |                       | QGNANIVFFDGITAGEKDFSALIA<br>R                     | 186 | 25 | 14 | 50.44  | b2*b2b3*b3b4*b4b11b25y6y13y15y17y18y25        | 2654.36 | 105.211 | 52505  | 3 | 885.46  | 1.10   |
| P0A1W6 LIVK_SALTY Leucine-ecific-binding protein | 2  |                       | TAGLDSSQGPTAAK                                    | 139 | 14 | 17 | 115.15 | b3°b3b4°b4b5°b5b12y1y4y6y8°y8y10*y10y11y12y14 | 1303.65 | 29.602  | 51391  | 2 | 652.33  | -0.28  |
| P0A1W6 LIVK_SALTY Leucine-ecific-binding protein | 3  |                       | VAIVGAMSGPVAQWGDMEFNGA<br>R                       | 27  | 23 | 6  | 17.51  | b1b2b3b9y5y9                                  | 2363.15 | 88.250  | 37544  | 3 | 788.39  | 10.85  |
| P0A1W6 LIVK_SALTY Leucine-ecific-binding protein | 4  |                       | LQKENIDFVYYGGYYPEMGQLMR                           | 211 | 23 | 5  | 23.83  | b9y6y12y13y23                                 | 2814.34 | 85.727  | 36893  | 3 | 938.78  | 3.56   |
| P0A1W6 LIVK_SALTY Leucine-ecific-binding protein | 5  |                       | TQFMGPEGVGNASLSNIAGGAAE<br>GMLVTMPK               | 242 | 31 | 11 | 36.42  | b2*b2b3b4y2y4y8y13°y13y17y31                  | 3035.47 | 93.432  | 35878  | 3 | 1012.50 | 3.78   |
| P0A1W6 LIVK_SALTY Leucine-ecific-binding protein | 6  | Carbamidomethyl+C(10) | LVGVEYDDACDPK                                     | 66  | 13 | 6  | 34.48  | b2b3b11y8y9y13                                | 1480.67 | 47.729  | 21148  | 2 | 740.84  | 2.06   |
| P0A1W6 LIVK_SALTY Leucine-ecific-binding protein | 7  |                       | QQYGEGLAR                                         | 170 | 9  | 3  | 30.51  | b6y5y8                                        | 1021.50 | 33.608  | 3679   | 1 | 1021.50 | -1.25  |
| P0A1W6 LIVK_SALTY Leucine-ecific-binding protein | 8  |                       | YILETVKPQR                                        | 153 | 10 | 4  | 54.94  | y3y4y6y8                                      | 1246.69 | 45.878  | 43604  | 3 | 416.24  | -18.80 |
| P0A1W6 LIVK_SALTY Leucine-ecific-binding protein | 9  |                       | IAIIHDK                                           | 163 | 7  | 3  | 40.5   | y3y5y6                                        | 809.48  | 33.558  | 27954  | 2 | 405.24  | -13.42 |
| P0A1W6 LIVK_SALTY Leucine-ecific-binding protein | 10 |                       | DPSGPYVWITYAAVQSLATAMTR                           | 293 | 23 | 3  | 13.06  | b14y4y10                                      | 2498.29 | 91.992  | 11645  | 3 | 833.44  | 21.40  |
| P0A1W6 LIVK_SALTY Leucine-ecific-binding protein | 11 | Carbamidomethyl+C(14) | IVNDGIQYVIGHLCSSSTQPASDIY<br>EDEGILMISPGATNPELTQR | 87  | 45 | 5  | 37.79  | b3b12y12y13y14                                | 4889.42 | 97.943  | 11521  | 3 | 1630.48 | 11.98  |
| P0A1W6 LIVK_SALTY Leucine-ecific-binding protein | 12 |                       | QGNANIVFFDGITAGEK                                 | 186 | 17 | 3  | 24.99  | y3y4y11                                       | 1780.87 | 65.222  | 8709   | 3 | 594.30  | -6.92  |
| P0A1W6 LIVK_SALTY Leucine-ecific-binding protein | 13 |                       | RYDQDPANK                                         | 273 | 9  | 5  | 59.99  | b3b5y3y4y5                                    | 1106.52 | 16.113  | 3740   | 2 | 553.76  | -4.96  |
| P0A1W6 LIVK_SALTY Leucine-ecific-binding protein | 14 |                       | GYQYIMRTAGLDSSQGPTAAK                             | 132 | 21 | 8  | 36.29  | b3b8b9b12y12*y12y15°y15                       | 2215.08 | 83.248  | 2093   | 3 | 739.03  | 0.99   |
| P0A1W6 LIVK_SALTY Leucine-ecific-binding protein | 15 | Oxidation+M(21)       | DPSGPYVWITYAAVQSLATAMTR                           | 293 | 23 | 5  | 49.1   | b4y7y8y9y10                                   | 2514.20 | 55.135  | 4011   | 4 | 629.31  | -11.94 |
| P0A1W6 LIVK_SALTY Leucine-ecific-binding protein | 16 | Oxidation+M(22)       | KDPSGPYVWITYAAVQSLATAMT<br>R                      | 292 | 24 | 3  | 12.72  | b12y10y15                                     | 2642.36 | 101.638 | 2166   | 3 | 881.46  | 10.35  |

|                                  |    |  |                                         |     |    |    |       |                                              |         |         |       |   |         |        |
|----------------------------------|----|--|-----------------------------------------|-----|----|----|-------|----------------------------------------------|---------|---------|-------|---|---------|--------|
| Q7CR87 SURA_SALTY Chaperone surA | 1  |  | ITVLPQEVDALAK                           | 149 | 13 | 11 | 92.84 | b3°b3b4y2y5y8y9y10*y10y11y12                 | 1396.80 | 71.365  | 51750 | 2 | 698.91  | -0.52  |
| Q7CR87 SURA_SALTY Chaperone surA | 2  |  | IQELPGIFAQALSTAK                        | 235 | 16 | 14 | 59.36 | b2b3°b3*b3b4*b6b11b15y2y4°y4y12y14y16        | 1686.94 | 90.649  | 50698 | 2 | 843.98  | 1.16   |
| Q7CR87 SURA_SALTY Chaperone surA | 3  |  | ITDEQLDQAIAANIAK                        | 90  | 15 | 6  | 43.16 | b5b9b10y4y5y15                               | 1642.87 | 81.227  | 40567 | 2 | 821.94  | 2.75   |
| Q7CR87 SURA_SALTY Chaperone surA | 4  |  | LAYDGLNYSTYR                            | 117 | 12 | 5  | 68.98 | y3y6y8y10y11                                 | 1435.69 | 59.242  | 35907 | 2 | 718.35  | 3.83   |
| Q7CR87 SURA_SALTY Chaperone surA | 5  |  | LNAGQAGQQLPDDATLR                       | 50  | 17 | 11 | 51.18 | b9*b9y1y4y7y8y9y11°y11*y11y17                | 1767.91 | 51.604  | 34290 | 2 | 884.46  | 6.15   |
| Q7CR87 SURA_SALTY Chaperone surA | 6  |  | QIGTQNDASTELNLSHILIALPENP<br>TSEQVNDAQR | 162 | 35 | 4  | 10.93 | b6y3y14y35                                   | 3816.93 | 89.472  | 26817 | 3 | 1272.98 | 8.12   |
| Q7CR87 SURA_SALTY Chaperone surA | 7  |  | QAESIVEEAR                              | 197 | 10 | 5  | 26.94 | b6b10y4y8y10                                 | 1131.57 | 38.891  | 23904 | 2 | 566.29  | 3.34   |
| Q7CR87 SURA_SALTY Chaperone surA | 8  |  | VAAVVNNGVVLESVDVGLMQSV<br>K             | 27  | 23 | 13 | 42.52 | b2b3b14y5°y5y8*y8y10y11*y11y13*y13y23        | 2343.21 | 91.817  | 19998 | 3 | 781.74  | -6.98  |
| Q7CR87 SURA_SALTY Chaperone surA | 9  |  | GQSQISIVTEVHAR                          | 274 | 14 | 5  | 45.47 | b6y6y8y9y10                                  | 1498.74 | 37.589  | 18926 | 3 | 500.25  | -11.40 |
| Q7CR87 SURA_SALTY Chaperone surA | 10 |  | LIMDQIILQMGQK                           | 73  | 13 | 4  | 32.35 | b6y4y6y7                                     | 1530.84 | 88.808  | 24493 | 2 | 765.92  | -0.16  |
| Q7CR87 SURA_SALTY Chaperone surA | 11 |  | HILLKPSMINDQQAR                         | 288 | 16 | 3  | 25.56 | y7y8y10                                      | 1860.99 | 49.832  | 7842  | 3 | 621.00  | -10.04 |
| Q7CR87 SURA_SALTY Chaperone surA | 12 |  | EYSQDPGSANQGGLGWATPDIF<br>DPAFR         | 326 | 28 | 5  | 26.86 | y4y7y8y11°y11                                | 3011.38 | 94.493  | 3897  | 2 | 1506.19 | 12.73  |
| Q7CR87 SURA_SALTY Chaperone surA | 13 |  | QNNMTMDQMR                              | 105 | 10 | 3  | 28.7  | b3y5y6                                       | 1268.52 | 53.958  | 2145  | 1 | 1268.52 | 3.75   |
| Q7CR87 SURA_SALTY Chaperone surA | 14 |  | GQISAPVHSSFGWHLIELLDTR                  | 362 | 22 | 4  | 13.45 | b6b9*b9y3                                    | 2463.29 | 117.080 | 1527  | 3 | 821.77  | 3.96   |
| Q7CR87 SURA_SALTY Chaperone surA | 15 |  | LAITYSADQALKGGQMGWGR                    | 214 | 21 | 7  | 58.89 | y4y8*y8y16y17y18y19                          | 2251.12 | 65.880  | 26417 | 3 | 751.05  | -2.28  |
| Q7CR87 SURA_SALTY Chaperone surA | 16 |  | KGDIVGPIR                               | 251 | 9  | 3  | 38.3  | y4y7y8                                       | 954.56  | 38.590  | 21233 | 2 | 477.78  | -12.08 |
| Q7CR87 SURA_SALTY Chaperone surA | 17 |  | TDAAQKDR                                | 388 | 8  | 3  | 36.13 | b4y5y7                                       | 904.45  | 41.675  | 4243  | 1 | 904.45  | 1.08   |
| Q7CR87 SURA_SALTY Chaperone surA | 18 |  | GQSQISIVTEVHARHILLKPSIMN<br>DQQAR       | 274 | 30 | 6  | 40.23 | y6y9°y9y10y11y13                             | 3340.74 | 90.622  | 3842  | 4 | 835.94  | -4.17  |
| Q7CR87 SURA_SALTY Chaperone surA | 19 |  | RITVLPQEVDALAK                          | 148 | 14 | 3  | 24.75 | b4b5y3                                       | 1552.89 | 66.267  | 2732  | 2 | 776.95  | -7.86  |
| Q7CR87 SURA_SALTY Chaperone surA | 20 |  | KFSEEAATWMQEQR                          | 404 | 14 | 4  | 19.31 | b8y4*y4y11                                   | 1740.81 | 57.057  | 2618  | 3 | 580.94  | 2.45   |
| Q7CR87 SURA_SALTY Chaperone surA | 21 |  | LNAGQAGQQLPDDATLRHQILER                 | 50  | 23 | 4  | 13.06 | b6*b6b10y3                                   | 2544.29 | 76.000  | 1562  | 3 | 848.77  | -13.72 |
| Q7CR87 SURA_SALTY Chaperone surA | 22 |  | LNAGQAGQQLPDDATL                        | 50  | 16 | 0  | 4.84  |                                              | 1611.81 | 51.645  | 5008  | 2 | 806.41  | 5.76   |
| Q7CR87 SURA_SALTY Chaperone surA | 23 |  | GQSQISIVTEVHAR                          | 274 | 14 | 0  | 3.63  |                                              | 1481.74 | 37.589  | 1782  | 3 | 494.58  | 4.45   |
| Q8ZQT5 TOLB_SALTY Protein tolB   | 1  |  | SNNTEPTWFPDSQTLAFTSDQAG<br>RPQVYK       | 287 | 29 | 16 | 80.66 | b2b4°b4b5°b5b8y9y11°y11y13y14y21y22y24y25y29 | 3285.57 | 78.462  | 77957 | 3 | 1095.86 | 8.62   |
| Q8ZQT5 TOLB_SALTY Protein tolB   | 2  |  | WAGPGAAPEDIGGIVAADLR                    | 43  | 20 | 11 | 84.75 | b6b7b8y2y4y5y6y9y13y15y20                    | 1936.00 | 86.308  | 70097 | 2 | 968.51  | 5.42   |
| Q8ZQT5 TOLB_SALTY Protein tolB   | 3  |  | VSDYDGYNQFVVHR                          | 183 | 14 | 9  | 68.77 | b4b10y2y4y7y9y10y12y14                       | 1698.77 | 54.525  | 69442 | 3 | 566.93  | -10.99 |
| Q8ZQT5 TOLB_SALTY Protein tolB   | 4  |  | IEITQGVDSARPIGVVPEFK                    | 24  | 19 | 13 | 81.78 | b2°b2b11b12*b12y2y3y14y15y16y17y18y19        | 2026.12 | 71.179  | 62378 | 3 | 676.04  | -7.59  |
| Q8ZQT5 TOLB_SALTY Protein tolB   | 5  |  | LAYVTFESGR                              | 213 | 10 | 5  | 26.94 | b2b3y5y7y10                                  | 1142.58 | 58.279  | 38981 | 2 | 571.80  | -0.32  |

|                                                         |    |                       |                                     |     |    |    |       |                                                          |         |         |        |   |         |        |
|---------------------------------------------------------|----|-----------------------|-------------------------------------|-----|----|----|-------|----------------------------------------------------------|---------|---------|--------|---|---------|--------|
| Q8ZQT5 TOLB_SALTY Protein tolB                          | 6  |                       | IAYVVQTNGGQFPYELR                   | 166 | 17 | 9  | 34.05 | b1b2b3b12y2y5°y5y6y12                                    | 1955.02 | 74.115  | 31847  | 2 | 978.01  | 10.12  |
| Q8ZQT5 TOLB_SALTY Protein tolB                          | 7  |                       | MNINGGAAQR                          | 316 | 10 | 12 | 81.4  | b2*b2y1y3y5y6y7*y7y8y9y10*y10                            | 1031.50 | 28.724  | 30973  | 2 | 516.26  | -0.47  |
| Q8ZQT5 TOLB_SALTY Protein tolB                          | 8  |                       | TGSLNLYVMDLASGQIR                   | 264 | 17 | 4  | 16.34 | b12y9y11y17                                              | 1837.95 | 90.178  | 28852  | 2 | 919.48  | 0.93   |
| Q8ZQT5 TOLB_SALTY Protein tolB                          | 9  |                       | SALVIQTLANGAVR                      | 223 | 14 | 7  | 59.21 | b3b4y6y9y10y11y14                                        | 1412.82 | 71.573  | 25630  | 2 | 706.91  | -0.09  |
| Q8ZQT5 TOLB_SALTY Protein tolB                          | 10 |                       | SPQPLMSPAWSPDGSK                    | 197 | 16 | 6  | 41.35 | b1b4b7b9y6y7                                             | 1684.81 | 60.176  | 11128  | 3 | 562.28  | 8.26   |
| Q8ZQT5 TOLB_SALTY Protein tolB                          | 11 |                       | YAGHTASDEVFEK                       | 142 | 13 | 3  | 28.15 | b6b9b10                                                  | 1453.64 | 37.952  | 37865  | 3 | 485.22  | -10.58 |
| Q8ZQT5 TOLB_SALTY Protein tolB                          | 12 |                       | HNGAPAFSPDGTK                       | 244 | 13 | 4  | 32.35 | b8y9y11y12                                               | 1298.63 | 33.266  | 13746  | 2 | 649.82  | 15.98  |
| Q8ZQT5 TOLB_SALTY Protein tolB                          | 13 |                       | FNPLDR                              | 67  | 6  | 1  | 13.63 | y4                                                       | 761.39  | 46.076  | 5568   | 2 | 381.20  | -2.65  |
| Q8ZQT5 TOLB_SALTY Protein tolB                          | 14 |                       | LPATDGQVK                           | 413 | 9  | 4  | 57.55 | y4y5y7y8                                                 | 928.53  | 28.634  | 1668   | 1 | 928.53  | 18.47  |
| Q8ZQT5 TOLB_SALTY Protein tolB                          | 15 |                       | LPATDGQVKSPAWSPYL                   | 413 | 17 | 3  | 16.34 | b9y6y12                                                  | 1829.95 | 88.740  | 156140 | 3 | 610.65  | 3.67   |
| Q8ZQT5 TOLB_SALTY Protein tolB                          | 16 |                       | ARLPATDGQVK                         | 411 | 11 | 4  | 41.54 | b5b7b9y6                                                 | 1155.64 | 29.994  | 10516  | 2 | 578.32  | -5.60  |
| Q8ZQT5 TOLB_SALTY Protein tolB                          | 17 |                       | SPQPLMSPAWSPDGSKLAYVTFESGR          | 197 | 26 | 9  | 36.37 | b8b10°b10*b10b13y6y8y10y13                               | 2808.38 | 136.530 | 2317   | 2 | 1404.69 | 4.17   |
| Q8ZQT5 TOLB_SALTY Protein tolB                          | 18 |                       | WAGPGAAPEDIGGIVAADLRNSGK            | 43  | 24 | 3  | 12.72 | b5b7y4                                                   | 2322.20 | 103.077 | 1973   | 2 | 1161.60 | 5.36   |
| Q8ZQT5 TOLB_SALTY Protein tolB                          | 19 | Oxidation+M(9)        | TGSLNLYVMDLASGQIR                   | 264 | 17 | 6  | 36.76 | b7b9°b9b13b15*b15                                        | 1853.92 | 103.053 | 3084   | 2 | 927.46  | -11.52 |
| Q8ZQT5 TOLB_SALTY Protein tolB                          | 20 |                       | VIQTLANGAVR                         | 226 | 11 | 1  | 7.32  | b3                                                       | 1141.65 | 71.592  | 18133  | 2 | 571.33  | -13.47 |
| P0A1S0 IHFA_SALTY Integration host factor subunit alpha | 1  |                       | TGEDIPITAR                          | 66  | 10 | 11 | 106.1 | b3b4°b4b5°b5y3y5y6y7y9y10                                | 1072.56 | 43.609  | 61066  | 2 | 536.78  | -4.67  |
| P0A1S0 IHFA_SALTY Integration host factor subunit alpha | 2  |                       | LSGFGNFDLR                          | 45  | 10 | 12 | 52.61 | b3b7*b7b10y1y2y4y8y9°y9*y9y10                            | 1125.57 | 72.875  | 36749  | 2 | 563.29  | -2.28  |
| P0A1S0 IHFA_SALTY Integration host factor subunit alpha | 3  |                       | ALENGEQVK                           | 36  | 9  | 9  | 45    | b4*b4b5b9y6°y6y8*y8y9                                    | 987.50  | 29.647  | 2066   | 2 | 494.26  | -7.97  |
| P0A1S0 IHFA_SALTY Integration host factor subunit alpha | 4  |                       | NQRPGR                              | 57  | 6  | 1  | 13.63 | b3                                                       | 727.40  | 50.523  | 6164   | 2 | 364.20  | 3.86   |
| P0A1S0 IHFA_SALTY Integration host factor subunit alpha | 5  |                       | ELVELFFEEIR                         | 24  | 11 | 3  | 24.33 | b8y7y9                                                   | 1423.73 | 102.622 | 1923   | 2 | 712.37  | -10.29 |
| P0A1S0 IHFA_SALTY Integration host factor subunit alpha | 6  |                       | NPKTGEDIPITAR                       | 63  | 13 | 4  | 32.35 | b6b10b11y8                                               | 1411.77 | 56.832  | 30379  | 3 | 471.26  | 8.99   |
| P0A1S0 IHFA_SALTY Integration host factor subunit alpha | 7  |                       | DAKELVELFFEEIR                      | 21  | 14 | 5  | 33.05 | b3b7y7y8°y8                                              | 1737.92 | 33.503  | 12596  | 4 | 435.24  | 8.29   |
| P0A1S0 IHFA_SALTY Integration host factor subunit alpha | 8  |                       | ALENGEQVKLSGFGNFDLR                 | 36  | 19 | 4  | 22.74 | b4y6°y6y7                                                | 2094.08 | 57.991  | 11761  | 4 | 524.28  | 10.84  |
| P0A1S0 IHFA_SALTY Integration host factor subunit alpha | 9  |                       | SRVENASPK                           | 88  | 9  | 3  | 30.51 | b7b8y7                                                   | 987.52  | 26.580  | 2460   | 2 | 494.26  | -5.44  |
| P66764 METK_SALTY S-adenosylmethionine synthetase       | 1  |                       | SLQEAVMEEIIPILPSEWLNSTSK            | 197 | 25 | 20 | 98.13 | b2°b2b5°b5b6°b6b9b11*b11b12y1y6y7y10y11°y11y12*y12y13y25 | 2856.51 | 111.823 | 54479  | 3 | 952.84  | 2.05   |
| P66764 METK_SALTY S-adenosylmethionine synthetase       | 2  | Carbamidomethyl+C(10) | FVIGGPMGDCGLTGRK                    | 230 | 16 | 7  | 59.35 | b13b14y9y10°y10y12y13                                    | 1664.81 | 62.678  | 27956  | 3 | 555.61  | -7.92  |
| P66764 METK_SALTY S-adenosylmethionine synthetase       | 3  |                       | ADPLEQQAGDQGLMFGYATNETDVLMPAPITYAHR | 109 | 35 | 5  | 21.47 | b3y5y9y10y35                                             | 3749.79 | 91.693  | 6167   | 3 | 1250.60 | 8.66   |
| P66764 METK_SALTY S-adenosylmethionine synthetase       | 4  | Carbamidomethyl+C(3)  | VACETYVK                            | 39  | 8  | 4  | 33.12 | b4y6°y6y7                                                | 969.47  | 30.113  | 26075  | 2 | 485.24  | -5.29  |
| P66764 METK_SALTY S-adenosylmethionine synthetase       | 5  |                       | IIVDTYGGMAR                         | 246 | 11 | 3  | 31.32 | y5y7y8                                                   | 1195.61 | 53.155  | 14551  | 2 | 598.31  | -4.59  |



|                                                                  |    |                                          |                                                    |     |    |    |       |                                            |         |         |       |   |         |        |
|------------------------------------------------------------------|----|------------------------------------------|----------------------------------------------------|-----|----|----|-------|--------------------------------------------|---------|---------|-------|---|---------|--------|
| [P66764]METK_SALTY S-adenosylmethionine synthetase               | 6  |                                          | ETAAYGHFGR                                         | 353 | 10 | 3  | 28.7  | b7b8y7                                     | 1108.52 | 109.991 | 2702  | 1 | 1108.52 | 6.28   |
| [P66764]METK_SALTY S-adenosylmethionine synthetase               | 7  |                                          | HLFTSESVSEGHDPK                                    | 3   | 15 | 3  | 24.18 | b12y6y7                                    | 1669.81 | 54.033  | 2539  | 2 | 835.41  | 16.30  |
| [P66764]METK_SALTY S-adenosylmethionine synthetase               | 8  |                                          | TGMVLVGGEITTSAWVDIEEITR                            | 47  | 23 | 3  | 22.09 | b12b13y9                                   | 2477.22 | 57.969  | 1687  | 3 | 826.41  | -16.16 |
| [P66764]METK_SALTY S-adenosylmethionine synthetase               | 9  |                                          | ENFPWEKTDK                                         | 363 | 10 | 3  | 26.94 | b3b7y8                                     | 1293.60 | 64.403  | 72496 | 2 | 647.30  | -11.32 |
| [P66764]METK_SALTY S-adenosylmethionine synthetase               | 10 |                                          | QSPDINQGVDRADPLEQGAGDQG<br>LMFGYATNETDVLMPAPITYAHR | 98  | 46 | 3  | 11.18 | b11y5y9                                    | 4959.37 | 88.973  | 18405 | 4 | 1240.60 | 8.27   |
| [P66764]METK_SALTY S-adenosylmethionine synthetase               | 11 |                                          | SQVTFQYDDGKIVGIDAVVLSTQ<br>HAEDIDQK                | 166 | 31 | 3  | 11.26 | b16y7y27                                   | 3419.65 | 111.248 | 2580  | 4 | 855.67  | -14.78 |
| [P66764]METK_SALTY S-adenosylmethionine synthetase               | 12 | Carbamidomethyl+C(10);<br>Oxidation+M(7) | FVIGGPMGDCGLTGRK                                   | 230 | 16 | 4  | 24.3  | b4b8y8y11                                  | 1680.84 | 69.255  | 11298 | 3 | 560.95  | 13.65  |
| [P66764]METK_SALTY S-adenosylmethionine synthetase               | 13 | Carbamidomethyl+C(1);<br>Oxidation+M(18) | CEIQVSYAIGVAEPTSIMVETFGTE<br>K                     | 294 | 26 | 5  | 26.5  | b6b13y7y10y11                              | 2875.35 | 76.961  | 4031  | 3 | 959.12  | -7.98  |
| [P66764]METK_SALTY S-adenosylmethionine synthetase               | 14 |                                          | SLQEAVMEEIIPLPSE                                   | 197 | 18 | 0  | 8.07  |                                            | 2026.05 | 111.786 | 4255  | 3 | 676.02  | -11.93 |
| [Q8ZQD4]LOLA_SALTY Outer-membrane<br>lipoprotein carrier protein | 1  |                                          | TLWFYNPFVEQATATWLK                                 | 85  | 18 | 16 | 104   | b2b3b4b5*b5b6*b6b7y1y2<br>y3y9y12y13y14y18 | 2215.15 | 116.633 | 34580 | 2 | 1108.08 | 10.58  |
| [Q8ZQD4]LOLA_SALTY Outer-membrane<br>lipoprotein carrier protein | 2  |                                          | DATGNTPFMLIAR                                      | 103 | 13 | 6  | 25.44 | b2b5*b5b6y7y13                             | 1406.71 | 79.185  | 30142 | 2 | 703.86  | -0.69  |
| [Q8ZQD4]LOLA_SALTY Outer-membrane<br>lipoprotein carrier protein | 3  |                                          | VTDGSGAAVQEGQGDLWVK                                | 44  | 19 | 10 | 50.1  | b1b3*b3b5b6b10b13y9y12<br>y19              | 1916.94 | 57.947  | 17950 | 2 | 958.98  | 5.03   |
| [Q8ZQD4]LOLA_SALTY Outer-membrane<br>lipoprotein carrier protein | 4  |                                          | VSSFHATFTQK                                        | 33  | 11 | 3  | 24.33 | b5b10y6                                    | 1252.61 | 41.509  | 9875  | 3 | 418.21  | -16.76 |
| [Q8ZQD4]LOLA_SALTY Outer-membrane<br>lipoprotein carrier protein | 5  |                                          | QDGDNFVLTPK                                        | 128 | 11 | 3  | 27.34 | b10y3y4                                    | 1233.62 | 53.834  | 7846  | 2 | 617.31  | 3.56   |
| [Q8ZQD4]LOLA_SALTY Outer-membrane<br>lipoprotein carrier protein | 6  |                                          | SAYQLKSQQNGAVDPSK                                  | 170 | 17 | 4  | 27.43 | b8b9b13y12                                 | 1820.90 | 60.856  | 4684  | 2 | 910.96  | -5.97  |
| [Q8ZQD4]LOLA_SALTY Outer-membrane<br>lipoprotein carrier protein | 7  |                                          | QDGDNFVLTPKASGNLK                                  | 128 | 18 | 4  | 15.6  | b8b11*b11y6                                | 1917.96 | 89.309  | 3903  | 2 | 959.48  | -3.12  |
| [Q8ZQD4]LOLA_SALTY Outer-membrane<br>lipoprotein carrier protein | 8  | Oxidation+M(9)                           | RPNLFNWHMTQPDESILVSDGK                             | 63  | 22 | 4  | 24.25 | b11y5y6y11                                 | 2600.25 | 38.209  | 6725  | 3 | 867.42  | -1.22  |
| [Q7CQV9]DPS_SALTY DNA protection<br>during starvation protein    | 1  |                                          | TALTDHLDTMAER                                      | 70  | 13 | 4  | 28.15 | y5y7y8y13                                  | 1473.68 | 52.942  | 49605 | 3 | 491.90  | -13.92 |
| [Q7CQV9]DPS_SALTY DNA protection<br>during starvation protein    | 2  |                                          | AVQLGGVALGTTQVINSK                                 | 83  | 18 | 7  | 31.03 | b2b4b15y2y9y11y13                          | 1756.00 | 68.178  | 25320 | 2 | 878.51  | 4.10   |
| [Q7CQV9]DPS_SALTY DNA protection<br>during starvation protein    | 3  |                                          | AIGEAKDEDTADIFTAASR                                | 134 | 19 | 9  | 81.78 | b12*b12b13y4y5y6y7y8y1<br>3                | 1980.94 | 59.032  | 25121 | 3 | 660.99  | -4.25  |
| [Q7CQV9]DPS_SALTY DNA protection<br>during starvation protein    | 4  |                                          | ASNLLYTR                                           | 10  | 8  | 4  | 40.9  | y1y4y5y6                                   | 937.50  | 44.785  | 22233 | 2 | 469.25  | -11.00 |
| [Q7CQV9]DPS_SALTY DNA protection<br>during starvation protein    | 5  |                                          | GANFIADVHEMLDGFR                                   | 55  | 15 | 4  | 40.72 | y6y8y9y10                                  | 1676.85 | 65.217  | 2160  | 2 | 838.93  | 14.92  |
| [Q7CQV9]DPS_SALTY DNA protection<br>during starvation protein    | 6  |                                          | SYPLDIHNVQDHLKELADR                                | 105 | 19 | 5  | 22.74 | b9*b9b10*b10y12                            | 2263.15 | 83.908  | 1806  | 2 | 1132.08 | 0.43   |
| [Q7CQV9]DPS_SALTY DNA protection<br>during starvation protein    | 7  |                                          | SYPLDIHNVQDHLK                                     | 105 | 14 | 4  | 19.31 | b10y8*y8y12                                | 1678.85 | 91.061  | 2030  | 2 | 839.93  | -4.22  |

|                                                            |    |                      |                         |     |    |    |        |                                          |         |         |        |   |         |        |
|------------------------------------------------------------|----|----------------------|-------------------------|-----|----|----|--------|------------------------------------------|---------|---------|--------|---|---------|--------|
| [Q7CQV9]DPS_SALTY DNA protection during starvation protein | 8  |                      | SYPLDIHNVQDHLKELADR     | 105 | 19 | 3  | 21.91  | b4b6b8                                   | 2263.16 | 66.634  | 6178   | 4 | 566.55  | 8.09   |
| [P64052]EFTS_SALTY Elongation factor Ts                    | 1  |                      | ITDVEVLK                | 104 | 8  | 4  | 40.9   | y4y6y7y8                                 | 916.52  | 49.222  | 124491 | 2 | 458.77  | -12.72 |
| [P64052]EFTS_SALTY Elongation factor Ts                    | 2  |                      | VASLEGDVLGSYQHGAR       | 134 | 17 | 15 | 131.81 | b3y4y5*y5y7y8°y8y9y10°y10y11y12y13y15y17 | 1758.85 | 59.598  | 119678 | 3 | 586.96  | -13.95 |
| [P64052]EFTS_SALTY Elongation factor Ts                    | 3  |                      | AEITASLVK               | 1   | 9  | 5  | 54.54  | y3y5y6y7y9                               | 931.54  | 49.269  | 102987 | 2 | 466.27  | -8.91  |
| [P64052]EFTS_SALTY Elongation factor Ts                    | 4  |                      | FTGEVSLTGQPFVMEPSK      | 222 | 18 | 7  | 40.28  | b5b11b15y1y3y6y13                        | 1953.98 | 75.535  | 75548  | 2 | 977.49  | 9.06   |
| [P64052]EFTS_SALTY Elongation factor Ts                    | 5  |                      | GADEELVK                | 159 | 8  | 7  | 51.12  | b3b5°b5b8y5y6y8                          | 860.43  | 32.032  | 64083  | 2 | 430.72  | -6.95  |
| [P64052]EFTS_SALTY Elongation factor Ts                    | 6  |                      | IGENINIR                | 125 | 8  | 8  | 54.13  | y2y3*y3y5y6y7°y7y8                       | 928.51  | 45.149  | 63474  | 2 | 464.76  | -10.39 |
| [P64052]EFTS_SALTY Elongation factor Ts                    | 7  |                      | VLDAAVAGK               | 95  | 9  | 7  | 67.77  | b2y3y4y6y7y8y9                           | 843.48  | 34.343  | 36400  | 2 | 422.25  | -11.36 |
| [P64052]EFTS_SALTY Elongation factor Ts                    | 8  |                      | ALTEANGDIELAIENMRK      | 25  | 18 | 6  | 32.79  | b6°b6b10b11y14y16                        | 1988.00 | 75.127  | 33555  | 3 | 663.34  | -7.80  |
| [P64052]EFTS_SALTY Elongation factor Ts                    | 9  |                      | AGNVAADGVK              | 52  | 11 | 7  | 50.57  | y1y2y4y5y6y7y11                          | 1014.55 | 37.432  | 21728  | 2 | 507.78  | -9.51  |
| [P64052]EFTS_SALTY Elongation factor Ts                    | 10 | Carbamidomethyl+C(8) | TGAGMMDCKK              | 15  | 10 | 7  | 68.17  | b2y3y4°y4y5y6y7                          | 1098.47 | 21.788  | 16969  | 2 | 549.74  | -2.44  |
| [P64052]EFTS_SALTY Elongation factor Ts                    | 11 |                      | EHNADVTGFIR             | 247 | 11 | 5  | 35.34  | b3°b3b6y5y9                              | 1258.62 | 49.947  | 13672  | 2 | 629.82  | 4.66   |
| [P64052]EFTS_SALTY Elongation factor Ts                    | 12 |                      | EYQVQLDIAMQSGKPKEIAEK   | 193 | 21 | 5  | 30.04  | b4°b4b9b10b19                            | 2405.21 | 73.392  | 2904   | 3 | 802.41  | -12.79 |
| [P64052]EFTS_SALTY Elongation factor Ts                    | 13 |                      | IGVLVAAK                | 151 | 8  | 4  | 54.13  | y3y5y6y7                                 | 770.50  | 47.734  | 52019  | 2 | 385.75  | -19.09 |
| [P64052]EFTS_SALTY Elongation factor Ts                    | 14 |                      | EYQVQLDIAMQSGKPK        | 193 | 16 | 8  | 56.23  | b3b9°b9b10b14y10y11y13                   | 1834.95 | 100.297 | 28289  | 2 | 917.98  | 8.58   |
| [P64052]EFTS_SALTY Elongation factor Ts                    | 15 |                      | ALTEANGDIELAIENMR       | 25  | 17 | 3  | 16.34  | b14y4y6                                  | 1859.91 | 86.839  | 18901  | 3 | 620.64  | -1.05  |
| [P64052]EFTS_SALTY Elongation factor Ts                    | 16 |                      | VALVAK                  | 119 | 6  | 1  | 13.63  | y4                                       | 600.41  | 47.721  | 3018   | 1 | 600.41  | 0.00   |
| [P64052]EFTS_SALTY Elongation factor Ts                    | 17 |                      | DAGFQAFADK              | 85  | 10 | 3  | 28.7   | b4b5y9                                   | 1069.47 | 28.776  | 2537   | 2 | 535.24  | -18.95 |
| [P64052]EFTS_SALTY Elongation factor Ts                    | 18 |                      | FEVGEGIEKVETDFAAEVAAMSK | 258 | 23 | 4  | 28.83  | y4y6y7y11                                | 2457.17 | 106.689 | 96234  | 3 | 819.73  | -4.37  |
| [P64052]EFTS_SALTY Elongation factor Ts                    | 19 |                      | KAGNVAADGVK             | 51  | 12 | 5  | 44.21  | b3b5y3y4y11                              | 1142.65 | 32.144  | 37943  | 2 | 571.83  | -6.52  |
| [P64052]EFTS_SALTY Elongation factor Ts                    | 20 |                      | KALTEANGDIELAIENMR      | 24  | 18 | 4  | 32.6   | y5y6y12y16                               | 1988.02 | 67.609  | 11294  | 2 | 994.52  | 6.63   |
| [P64052]EFTS_SALTY Elongation factor Ts                    | 21 |                      | RVASLEGDVLGSYQHGAR      | 133 | 18 | 6  | 47.38  | y3y8*y8y9y12y13                          | 1914.97 | 81.530  | 1879   | 2 | 957.99  | -2.42  |
| [P64052]EFTS_SALTY Elongation factor Ts                    | 22 | Phosphoryl STY(6)    | FTGEVSLTGQPFVMEPSK      | 222 | 18 | 4  | 26.61  | b5y5y6y11                                | 2033.94 | 77.774  | 5840   | 2 | 1017.47 | 10.98  |
| [P64052]EFTS_SALTY Elongation factor Ts                    | 23 | Oxidation+M(16)      | ALTEANGDIELAIENMR       | 25  | 17 | 3  | 16.34  | b4b7y5                                   | 1875.91 | 49.596  | 1865   | 3 | 625.97  | -1.30  |
| [P64052]EFTS_SALTY Elongation factor Ts                    | 24 |                      | TDVEVLK                 | 105 | 7  | 4  | 40.9   | b3b4°b4b5                                | 803.44  | 49.199  | 5727   | 1 | 803.44  | -14.51 |
| [P64052]EFTS_SALTY Elongation factor Ts                    | 25 | Carbamidomethyl+C(7) | GAGMMDCKK               | 16  | 9  | 0  | 2.02   |                                          | 997.42  | 21.795  | 4205   | 2 | 499.22  | -2.02  |
| [P64052]EFTS_SALTY Elongation factor Ts                    | 26 |                      | LDAAVAGK                | 96  | 8  | 0  | 1.61   |                                          | 744.42  | 34.309  | 2689   | 1 | 744.42  | -6.89  |
| [P64052]EFTS_SALTY Elongation factor Ts                    | 27 |                      | VLDAAVAG                | 95  | 8  | 1  | 8.82   | y7                                       | 715.40  | 34.289  | 2288   | 2 | 358.20  | -3.67  |
| [P64052]EFTS_SALTY Elongation factor Ts                    | 28 |                      | EHNADVTGFIR             | 247 | 11 | 1  | 7.87   | y4                                       | 1240.59 | 49.969  | 1510   | 3 | 414.20  | -9.35  |

|                                               |    |                                            |                                    |     |    |    |       |                                      |         |         |       |   |         |        |
|-----------------------------------------------|----|--------------------------------------------|------------------------------------|-----|----|----|-------|--------------------------------------|---------|---------|-------|---|---------|--------|
| Q9L4T0 LUXS_SALTY S-ribosylhomocysteine lyase | 1  |                                            | TMNTPHGDAITVFDLR                   | 23  | 16 | 12 | 86.86 | b2b10y1y2y3y4y5y6y10y11y12y16        | 1787.85 | 71.895  | 50587 | 3 | 596.62  | -10.99 |
| Q9L4T0 LUXS_SALTY S-ribosylhomocysteine lyase | 2  |                                            | TGFYMSLIGTPDEQR                    | 84  | 15 | 7  | 39.98 | b12y3*y3y7y8y12y15                   | 1714.82 | 79.275  | 20509 | 2 | 857.92  | 7.05   |
| Q9L4T0 LUXS_SALTY S-ribosylhomocysteine lyase | 3  | Carbamidomethyl+C(15)                      | VQDQNQIPELNVYQCGTYQMHSLSAQDIAR     | 113 | 31 | 11 | 52.54 | b2*b2b8b10y3y4y9y10y11y24y31         | 3635.71 | 75.955  | 19971 | 3 | 1212.57 | 6.85   |
| Q9L4T0 LUXS_SALTY S-ribosylhomocysteine lyase | 4  |                                            | MQAPAVR                            | 13  | 7  | 5  | 37.49 | b2b3y3y4y7                           | 772.40  | 31.203  | 17693 | 2 | 386.71  | -11.22 |
| Q9L4T0 LUXS_SALTY S-ribosylhomocysteine lyase | 5  | Carbamidomethyl+C(18)                      | DHLNGNGVEIIDISPMGCR                | 65  | 19 | 5  | 28.51 | b9b11y5y6y19                         | 2096.97 | 72.307  | 5713  | 3 | 699.66  | -8.73  |
| Q9L4T0 LUXS_SALTY S-ribosylhomocysteine lyase | 6  |                                            | MPLLDSFAVDHTR                      | 0   | 13 | 3  | 20.67 | b8y3y11                              | 1501.76 | 61.857  | 1650  | 2 | 751.38  | 7.48   |
| Q9L4T0 LUXS_SALTY S-ribosylhomocysteine lyase | 7  |                                            | PLLDSFAVDHTR                       | 1   | 12 | 7  | 74.65 | b5b7b10y3y5y7y8                      | 1370.68 | 63.864  | 2296  | 2 | 685.84  | -20.75 |
| Q9L4T0 LUXS_SALTY S-ribosylhomocysteine lyase | 8  | Carbamidomethyl+C(18)                      | DHLNGNGVEIIDISPMGCRTGFYMSLIGTPDEQR | 65  | 34 | 4  | 13.07 | b6b9y7y13                            | 3792.78 | 107.706 | 11205 | 4 | 948.95  | 0.97   |
| Q9L4T0 LUXS_SALTY S-ribosylhomocysteine lyase | 9  |                                            | TGFYMSLIGTPDEQRVADAWK              | 84  | 21 | 4  | 13.89 | b9y4*y4y12                           | 2385.17 | 109.980 | 2700  | 3 | 795.73  | 7.17   |
| Q9L4T0 LUXS_SALTY S-ribosylhomocysteine lyase | 10 | Carbamidomethyl+C(18)                      | TMNTPHGDAITVFDLRFCIPNK             | 23  | 22 | 3  | 22.2  | b11b12y7                             | 2547.28 | 136.474 | 2012  | 2 | 1274.14 | 12.65  |
| Q9L4T0 LUXS_SALTY S-ribosylhomocysteine lyase | 11 | Carbamidomethyl+C(15);Oxidation+M(20)      | VQDQNQIPELNVYQCGTYQMHSLSAQDIAR     | 113 | 31 | 3  | 11.26 | b3b7y11                              | 3651.68 | 105.236 | 2761  | 3 | 1217.90 | -1.07  |
| Q9L4T0 LUXS_SALTY S-ribosylhomocysteine lyase | 12 | Carbamidomethyl+C(18);Oxidation+M(16)      | DHLNGNGVEIIDISPMGCR                | 65  | 19 | 4  | 20.73 | b3b5y3y9                             | 2112.96 | 47.397  | 2660  | 2 | 1056.98 | -9.71  |
| Q9L4T0 LUXS_SALTY S-ribosylhomocysteine lyase | 13 | Oxidation+M(1)                             | MPLLDSFAVDHTR                      | 0   | 13 | 3  | 20.67 | b6y6y10                              | 1517.76 | 76.084  | 2491  | 2 | 759.38  | 9.25   |
| Q9L4T0 LUXS_SALTY S-ribosylhomocysteine lyase | 14 | Oxidation+M(13)                            | GIHTLEHLFAGFMR                     | 51  | 14 | 7  | 59.12 | b7*b7b9b11y3y4y5                     | 1644.84 | 63.278  | 2008  | 2 | 822.92  | 4.45   |
| Q8ZP20 TREA_SALTY Periplasmic trehalase       | 1  |                                            | VAAAAQAHLQLPGGLATTSVK              | 428 | 21 | 12 | 58.45 | b1b2b9b11y4y7y9*y9y10y13y19y21       | 2004.11 | 58.361  | 31813 | 3 | 668.71  | -8.04  |
| Q8ZP20 TREA_SALTY Periplasmic trehalase       | 2  |                                            | TFADAIPNSDPLMILADYR                | 68  | 19 | 15 | 61.56 | b1b2*b2b5*b5b6y2y4*y4y5*y5y6y9y13y19 | 2123.07 | 102.225 | 29448 | 2 | 1062.04 | 8.62   |
| Q8ZP20 TREA_SALTY Periplasmic trehalase       | 3  |                                            | TTTIAPVDLNALLYQLEK                 | 335 | 18 | 14 | 51.88 | b3*b3b4*b4b8y1y2*y2y3y5*y5y13y14y18  | 2003.12 | 104.358 | 24799 | 2 | 1002.07 | 8.84   |
| Q8ZP20 TREA_SALTY Periplasmic trehalase       | 4  | Carbamidomethyl+C(6);Carbamidomethyl+C(12) | MLDLICPQEKPCDSVPSTRPASLSATPTK      | 534 | 29 | 5  | 24.95 | b2b3b9y23y24                         | 3199.57 | 64.719  | 20341 | 4 | 800.65  | -3.59  |
| Q8ZP20 TREA_SALTY Periplasmic trehalase       | 5  |                                            | DQLTAAALFPLYVNAAAK                 | 405 | 18 | 4  | 24.52 | b4b5b7*b7                            | 1877.01 | 97.867  | 10266 | 2 | 939.01  | -4.49  |
| Q8ZP20 TREA_SALTY Periplasmic trehalase       | 6  |                                            | EYAYWMEGVETLQPGQQNQNR              | 243 | 20 | 5  | 14.39 | b2b3y5y13y20                         | 2427.11 | 98.447  | 9243  | 4 | 607.53  | 1.21   |
| Q8ZP20 TREA_SALTY Periplasmic trehalase       | 7  |                                            | WDSLLPLPESYVVPGGR                  | 142 | 17 | 5  | 22.96 | b6b11y4y12y17                        | 1884.99 | 92.247  | 8049  | 2 | 943.00  | 3.56   |
| Q8ZP20 TREA_SALTY Periplasmic trehalase       | 8  |                                            | VADMVANFGYEIDAWGHIPNGNR            | 183 | 23 | 5  | 29.51 | b3b5b8b10y12                         | 2546.18 | 102.557 | 3178  | 3 | 849.40  | -3.07  |
| Q8ZP20 TREA_SALTY Periplasmic trehalase       | 9  |                                            | WMDNPQQLSTIR                       | 323 | 12 | 3  | 35.53 | y8y9y10                              | 1488.73 | 63.206  | 38104 | 2 | 744.87  | 0.74   |
| Q8ZP20 TREA_SALTY Periplasmic trehalase       | 10 |                                            | SQPPFFAFMVELLAQHEGDDALK            | 212 | 23 | 6  | 20.15 | b5*b5b9*b9b13y8                      | 2590.21 | 87.466  | 35663 | 3 | 864.08  | -20.64 |
| Q8ZP20 TREA_SALTY Periplasmic trehalase       | 11 |                                            | AIEMHLWNNK                         | 380 | 10 | 4  | 26.94 | b6*b6y3y7                            | 1255.61 | 43.162  | 20609 | 3 | 419.21  | -11.86 |
| Q8ZP20 TREA_SALTY Periplasmic trehalase       | 12 |                                            | FLTNVQHTYDR                        | 486 | 11 | 4  | 24.33 | b8y3*y3y7                            | 1393.68 | 69.883  | 14627 | 3 | 465.23  | -1.66  |
| Q8ZP20 TREA_SALTY Periplasmic trehalase       | 13 |                                            | LFPDQK                             | 62  | 6  | 1  | 13.63 | y3                                   | 747.41  | 51.335  | 12900 | 1 | 747.41  | 12.33  |
| Q8ZP20 TREA_SALTY Periplasmic trehalase       | 14 |                                            | SNPNRPATEIYR                       | 296 | 12 | 4  | 32.23 | b7b9y5y8                             | 1417.75 | 45.118  | 2564  | 3 | 473.25  | 19.46  |

|                                               |    |                                                      |                                       |     |    |    |       |                                     |         |         |       |   |         |        |
|-----------------------------------------------|----|------------------------------------------------------|---------------------------------------|-----|----|----|-------|-------------------------------------|---------|---------|-------|---|---------|--------|
| Q8ZP20 TREA_SALTY Periplasmic trehalase       | 15 |                                                      | DTPRPESWVEDIATAK                      | 280 | 16 | 3  | 23.72 | b5b6y7                              | 1814.90 | 56.853  | 2393  | 2 | 907.95  | 2.42   |
| Q8ZP20 TREA_SALTY Periplasmic trehalase       | 16 |                                                      | YVPPAGQSLR                            | 113 | 10 | 3  | 26.94 | b5b9y5                              | 1087.57 | 45.519  | 2026  | 2 | 544.29  | -14.25 |
| Q8ZP20 TREA_SALTY Periplasmic trehalase       | 17 |                                                      | NVEKWDSLLPLPESYVVPGR                  | 138 | 21 | 5  | 24.73 | b11*b11y3y4y10                      | 2355.24 | 88.689  | 30946 | 3 | 785.75  | 1.24   |
| Q8ZP20 TREA_SALTY Periplasmic trehalase       | 18 |                                                      | QKAIEMHLWNNK                          | 378 | 12 | 4  | 34.29 | b6b10b11y7                          | 1511.78 | 74.082  | 2732  | 2 | 756.39  | 1.37   |
| Q8ZP20 TREA_SALTY Periplasmic trehalase       | 19 | Phosphoryl STY(8)                                    | HFVDVNFTLPK                           | 98  | 11 | 8  | 52.55 | b4b7y5°y5y7y9°y9*y9                 | 1396.67 | 69.793  | 14484 | 2 | 698.84  | 10.93  |
| Q8ZP20 TREA_SALTY Periplasmic trehalase       | 20 | Oxidation+M(13)                                      | TFADAIPNSDPLMILADYR                   | 68  | 19 | 9  | 29.46 | b6°b6b8°b8b14°b14*b14y7y11          | 2139.05 | 103.019 | 17367 | 3 | 713.69  | 3.08   |
| Q8ZP20 TREA_SALTY Periplasmic trehalase       | 21 | Oxidation+M(9)                                       | SQPPFFAFMVELLAQHEGDDALK               | 212 | 23 | 10 | 55.94 | b9°b9b11y6y7y8y10*y10y11*y11        | 2606.27 | 136.433 | 7956  | 3 | 869.43  | 3.47   |
| P05989 ILVC_SALTY Ketol-acid reductoisomerase | 1  |                                                      | GFGVPTLIAVHPENDPQGEGMAIAK             | 167 | 25 | 8  | 32.32 | b2b3b4y2y8y14y21y25                 | 2548.29 | 77.977  | 55742 | 3 | 850.10  | 1.34   |
| P05989 ILVC_SALTY Ketol-acid reductoisomerase | 2  |                                                      | DGAALGYSHGFNIVEVGEQIRK                | 123 | 22 | 8  | 29    | b3b5°b5b6°b6y6y17y22                | 2360.20 | 73.132  | 52955 | 3 | 787.40  | 0.00   |
| P05989 ILVC_SALTY Ketol-acid reductoisomerase | 3  |                                                      | LIQFGWETITEALK                        | 252 | 14 | 7  | 38.56 | b3y1y2y9y10y11y14                   | 1648.90 | 102.187 | 38951 | 2 | 824.95  | 1.04   |
| P05989 ILVC_SALTY Ketol-acid reductoisomerase | 4  |                                                      | AYALSEQLKEIMAPLFQK                    | 284 | 18 | 6  | 21.78 | b2b3b8y5y9y18                       | 2080.10 | 103.967 | 32714 | 3 | 694.04  | -6.10  |
| P05989 ILVC_SALTY Ketol-acid reductoisomerase | 5  |                                                      | ANYFNTLNL                             | 1   | 10 | 15 | 121.1 | b2*b2b3*b3b6b7b9*b9y3y4y6y7*y7y8y10 | 1225.63 | 68.620  | 28887 | 2 | 613.32  | -5.08  |
| P05989 ILVC_SALTY Ketol-acid reductoisomerase | 6  |                                                      | TAFETAPQYEGK                          | 336 | 12 | 11 | 78.91 | b4°b4b6y6y7y8°y8y9°y9y10y12         | 1341.64 | 42.679  | 18456 | 2 | 671.32  | 4.19   |
| P05989 ILVC_SALTY Ketol-acid reductoisomerase | 7  | Carbamidomethyl+C(6)                                 | VVIVGCGAQGLNQLNMR                     | 39  | 18 | 3  | 15.6  | b7y6y8                              | 1885.97 | 65.255  | 6958  | 2 | 943.49  | 0.06   |
| P05989 ILVC_SALTY Ketol-acid reductoisomerase | 8  | Carbamidomethyl+C(11)<br>;Carbamidomethyl+C(21)<br>) | SDLMGEQTILCGMLQAGSLLCFDK              | 215 | 24 | 5  | 19.47 | b5°b5b8b12y4                        | 2687.29 | 93.295  | 17347 | 3 | 896.44  | 13.45  |
| P05989 ILVC_SALTY Ketol-acid reductoisomerase | 9  |                                                      | DGAALGYSHGFNIVEVGEQIR                 | 123 | 21 | 7  | 40.93 | b5°b5b14°b14y5y6y7                  | 2232.11 | 92.204  | 15716 | 2 | 1116.56 | 3.94   |
| P05989 ILVC_SALTY Ketol-acid reductoisomerase | 10 |                                                      | AYALSEQLK                             | 284 | 9  | 3  | 30.51 | b4b6y7                              | 1022.55 | 48.812  | 5754  | 2 | 511.78  | -3.70  |
| P05989 ILVC_SALTY Ketol-acid reductoisomerase | 11 |                                                      | LVAEGTDPAYAEK                         | 239 | 13 | 3  | 20.67 | b10y6y8                             | 1363.65 | 47.989  | 5671  | 3 | 455.22  | -14.59 |
| P05989 ILVC_SALTY Ketol-acid reductoisomerase | 12 |                                                      | DEFADGASYLQGK                         | 25  | 13 | 4  | 20.67 | b4°b4y9y11                          | 1400.64 | 94.524  | 2307  | 2 | 700.82  | 2.70   |
| P05989 ILVC_SALTY Ketol-acid reductoisomerase | 13 |                                                      | AWAAATGGHR                            | 192 | 10 | 4  | 28.7  | b5y6°y6y7                           | 997.50  | 107.706 | 2085  | 1 | 997.50  | 8.51   |
| P05989 ILVC_SALTY Ketol-acid reductoisomerase | 14 |                                                      | QGGITLMMDR                            | 266 | 10 | 7  | 54.37 | b4b5°b5*b5y3y7y8                    | 1121.56 | 64.411  | 1699  | 2 | 561.28  | 14.48  |
| P05989 ILVC_SALTY Ketol-acid reductoisomerase | 15 |                                                      | VGTYEELIPQADLVVNLTDPKQHS DVVR         | 88  | 28 | 10 | 42.93 | b6b11b13°b13b16y10y11y13*y13y20     | 3135.62 | 82.431  | 47446 | 4 | 784.66  | -4.28  |
| P05989 ILVC_SALTY Ketol-acid reductoisomerase | 16 | Carbamidomethyl+C(11)                                | DITVVMVAPKCPGTEVR                     | 145 | 17 | 3  | 16.34 | b3y7y10                             | 1871.97 | 58.567  | 27276 | 2 | 936.49  | 0.13   |
| P05989 ILVC_SALTY Ketol-acid reductoisomerase | 17 | Carbamidomethyl+C(11)<br>;Carbamidomethyl+C(21)<br>) | SDLMGEQTILCGMLQAGSLLCFDKLVAEGTDPAYAEK | 215 | 37 | 9  | 39.43 | b3b4b10y4y6°y6y9y11y17              | 4031.95 | 118.686 | 13869 | 3 | 1344.66 | 10.05  |
| P05989 ILVC_SALTY Ketol-acid reductoisomerase | 18 |                                                      | LIQFGWETITEALKQGGITLMMDR              | 252 | 24 | 3  | 22.02 | b11y11y12                           | 2751.41 | 75.055  | 5944  | 3 | 917.81  | -2.57  |
| P05989 ILVC_SALTY Ketol-acid reductoisomerase | 19 | Phosphoryl STY(10)                                   | LVAEGTDPAYAEK                         | 239 | 13 | 5  | 20.67 | b7°b7b9y3°y3                        | 1443.64 | 83.341  | 3240  | 3 | 481.89  | 7.69   |
| P05989 ILVC_SALTY Ketol-acid reductoisomerase | 20 | Phosphoryl STY(8)                                    | DSGLDISYALRK                          | 57  | 12 | 4  | 36.2  | b4b7y6_H3PO4 y5y6                   | 1417.68 | 136.520 | 1800  | 1 | 1417.68 | 11.45  |
| P05989 ILVC_SALTY Ketol-acid reductoisomerase | 21 | Phosphoryl STY(3)                                    | LLTWREETGK                            | 326 | 10 | 3  | 26.94 | b3b6y6                              | 1312.61 | 136.469 | 1575  | 1 | 1312.61 | -9.95  |

|                                               |    |                                       |                                                 |     |    |    |       |                                      |         |         |       |   |         |        |
|-----------------------------------------------|----|---------------------------------------|-------------------------------------------------|-----|----|----|-------|--------------------------------------|---------|---------|-------|---|---------|--------|
| P05989 ILVC_SALTY Ketol-acid reductoisomerase | 22 | Oxidation+M(6)                        | DITVVMVAPK                                      | 145 | 10 | 3  | 26.94 | b3b6y3                               | 1088.60 | 29.655  | 19675 | 2 | 544.80  | -1.57  |
| P0A1P6 GLNA_SALTY Glutamine synthetase        | 1  |                                       | AGGVFTDEAIDAYIALR                               | 430 | 17 | 5  | 16.34 | b5b14y2y12y17                        | 1781.88 | 77.247  | 61826 | 2 | 891.44  | -13.77 |
| P0A1P6 GLNA_SALTY Glutamine synthetase        | 2  |                                       | LVPGYEAPVMLAYSAR                                | 322 | 16 | 8  | 53.2  | b15y1y2y9y11y13y14y15                | 1736.91 | 78.365  | 38069 | 2 | 868.96  | 4.99   |
| P0A1P6 GLNA_SALTY Glutamine synthetase        | 3  |                                       | GGYFPVPPVDSAQDIR                                | 177 | 16 | 11 | 74.35 | b3b6b12b14y2y4°y4y10y11y12y16        | 1717.86 | 70.768  | 31802 | 2 | 859.43  | 4.55   |
| P0A1P6 GLNA_SALTY Glutamine synthetase        | 4  |                                       | AINALANPTTNSYKR                                 | 307 | 15 | 13 | 89.09 | b2b3y4y6y7*y7y8*y8y9*y9y10y13y15     | 1633.85 | 43.350  | 29927 | 3 | 545.29  | -8.74  |
| P0A1P6 GLNA_SALTY Glutamine synthetase        | 5  |                                       | ATGIADTVLFGPEPEFFLFDDIR                         | 117 | 23 | 13 | 56.48 | b2°b2b4b6°b6b13b21y1y2y4y5°y5y6      | 2570.28 | 117.946 | 22352 | 3 | 857.43  | -1.61  |
| P0A1P6 GLNA_SALTY Glutamine synthetase        | 6  |                                       | NLYDLPPEEAK                                     | 395 | 11 | 6  | 47.78 | b4b6b7y4°y4y6                        | 1288.65 | 45.021  | 19494 | 3 | 430.22  | 6.44   |
| P0A1P6 GLNA_SALTY Glutamine synthetase        | 7  |                                       | GINESDMVLPMDASTAVIDPFFADSTLIIR                  | 59  | 30 | 13 | 95.24 | b9*b9y3y4y6y7y8y9y11y12y13y20y30     | 3238.62 | 114.200 | 14208 | 3 | 1080.21 | 5.43   |
| P0A1P6 GLNA_SALTY Glutamine synthetase        | 8  |                                       | AINALANPTTNSYK                                  | 307 | 14 | 4  | 38.77 | y7y9y10y12                           | 1477.76 | 48.612  | 12989 | 2 | 739.39  | -0.99  |
| P0A1P6 GLNA_SALTY Glutamine synthetase        | 9  |                                       | SAEHVLTMLNEHEVK                                 | 1   | 15 | 6  | 24.18 | b2b6°b6b7y9*y9                       | 1736.84 | 55.669  | 7484  | 3 | 579.62  | -10.89 |
| P0A1P6 GLNA_SALTY Glutamine synthetase        | 10 | Carbamidomethyl+C(11)                 | FPDPAANPYLCFAALLMAGLDGIK                        | 360 | 24 | 8  | 27.62 | b7b15°b15y2y5y7y8y24                 | 2565.28 | 136.702 | 7400  | 3 | 855.77  | -2.57  |
| P0A1P6 GLNA_SALTY Glutamine synthetase        | 11 |                                       | EIPQVAGSLEEALNALDLDR                            | 406 | 20 | 5  | 19.79 | b8b10°b10y12y15                      | 2153.12 | 102.913 | 3510  | 2 | 1077.06 | 5.44   |
| P0A1P6 GLNA_SALTY Glutamine synthetase        | 12 |                                       | MSAEHVLTMLNEHEVK                                | 0   | 16 | 4  | 17.18 | b3b7y10°y10                          | 1867.90 | 68.661  | 3648  | 2 | 934.45  | -3.40  |
| P0A1P6 GLNA_SALTY Glutamine synthetase        | 13 |                                       | FNTMTK                                          | 225 | 6  | 2  | 13.63 | b5*b5                                | 741.35  | 31.896  | 3231  | 1 | 741.35  | -9.96  |
| P0A1P6 GLNA_SALTY Glutamine synthetase        | 14 |                                       | FGASISGSHVAIDDIEGAWNSSTK                        | 140 | 24 | 4  | 22.02 | b11y4y5*y5                           | 2449.17 | 86.569  | 3123  | 3 | 817.06  | 3.49   |
| P0A1P6 GLNA_SALTY Glutamine synthetase        | 15 | Carbamidomethyl+C(1)                  | CDILEPGTLQGYDR                                  | 89  | 14 | 5  | 27.61 | b7°b7b11y5y9                         | 1636.77 | 75.543  | 1603  | 3 | 546.26  | 5.74   |
| P0A1P6 GLNA_SALTY Glutamine synthetase        | 16 |                                       | NGTNLFSGDKYAGLSEQALYYIGGVIK                     | 277 | 27 | 3  | 11.92 | b3b10y13                             | 2878.45 | 111.814 | 23105 | 4 | 720.37  | -4.41  |
| P0A1P6 GLNA_SALTY Glutamine synthetase        | 17 |                                       | GKEQHV TIPAHQVNAEFFEEGK                         | 26  | 22 | 3  | 13.45 | b3b5y11                              | 2495.25 | 113.409 | 11489 | 3 | 832.42  | 7.34   |
| P0A1P6 GLNA_SALTY Glutamine synthetase        | 18 |                                       | EIPQVAGSLEEALNALDLDFLFLK                        | 406 | 24 | 3  | 23.01 | y19y21y22                            | 2670.40 | 112.777 | 9532  | 3 | 890.80  | -0.55  |
| P0A1P6 GLNA_SALTY Glutamine synthetase        | 19 |                                       | FGASISGSHVAIDDIEGAWNSSTKYEGGNK                  | 140 | 30 | 4  | 14.19 | b9b12y5y13                           | 3097.49 | 77.172  | 6296  | 4 | 775.13  | 12.61  |
| P0A1P6 GLNA_SALTY Glutamine synthetase        | 20 |                                       | ATGIADTVLFGPEPEFFLFDDIRFGASISGSHVAIDDIEGAWNSSTK | 117 | 47 | 6  | 22.02 | b8b14b15y6y11*y11                    | 5000.37 | 69.825  | 5974  | 5 | 1000.88 | -10.45 |
| P0A1P6 GLNA_SALTY Glutamine synthetase        | 21 |                                       | IHPGEAMDKNLYDLPPEEAK                            | 386 | 20 | 6  | 38.9  | b7b11b13b16y8y15                     | 2267.07 | 68.510  | 4512  | 3 | 756.36  | -14.11 |
| P0A1P6 GLNA_SALTY Glutamine synthetase        | 22 |                                       | HAKAINALANPTTNSYK                               | 304 | 17 | 6  | 39.19 | y3°y3y4y5*y5y12                      | 1813.94 | 86.284  | 1799  | 3 | 605.32  | -7.27  |
| P0A1P6 GLNA_SALTY Glutamine synthetase        | 23 | Carbamidomethyl+C(11);Oxidation+M(17) | FPDPAANPYLCFAALLMAGLDGIK                        | 360 | 24 | 3  | 23.01 | b4b8b9                               | 2581.29 | 87.033  | 4531  | 3 | 861.10  | 3.59   |
| P0A1P6 GLNA_SALTY Glutamine synthetase        | 24 | Carbamidomethyl+C(4);Oxidation+M()    | SEMCLVMEQMGLVVEAHHHEVA TAGQNEVATR               | 193 | 32 | 5  | 36.6  | y8°y8*y8y9y10                        | 3579.66 | 96.177  | 3123  | 3 | 1193.89 | 4.84   |
| P0A1P6 GLNA_SALTY Glutamine synthetase        | 25 |                                       | NALANPTTNSYKR                                   | 309 | 13 | 0  | 4.03  |                                      | 1449.74 | 43.366  | 2517  | 2 | 725.38  | 0.17   |
| P66932 TIG_SALTY Trigger factor               | 1  |                                       | NVALEEQAVEAVLAK                                 | 399 | 15 | 14 | 89.1  | b2b3b4b5b9y1y3y5y11*y11y12y13°y13y15 | 1583.86 | 80.916  | 72572 | 2 | 792.44  | 0.46   |
| P66932 TIG_SALTY Trigger factor               | 2  |                                       | FGVEDGSVAGLR                                    | 255 | 12 | 11 | 59.2  | b2b3b8b10°b10y1y2y8y9y11y12          | 1206.60 | 57.972  | 38418 | 2 | 603.81  | -6.27  |

|                                          |    |                |                          |     |    |    |        |                                                |         |        |       |   |         |        |
|------------------------------------------|----|----------------|--------------------------|-----|----|----|--------|------------------------------------------------|---------|--------|-------|---|---------|--------|
| P66932 TIG_SALTY Trigger factor          | 3  |                | GLIEEMASAYEDPKEVIEFYSK   | 368 | 22 | 8  | 36.44  | b2b5°b5b6b14y5y10y19                           | 2548.23 | 98.875 | 37194 | 3 | 850.08  | 7.28   |
| P66932 TIG_SALTY Trigger factor          | 4  |                | ANDIDVPSALIDSEIDVLRR     | 296 | 20 | 9  | 28.05  | b2*b2b3b5*b5y1y4y14y16                         | 2211.15 | 91.269 | 35074 | 3 | 737.72  | -6.29  |
| P66932 TIG_SALTY Trigger factor          | 5  |                | ELPELTEEFIKR             | 243 | 12 | 4  | 32.52  | y4y7y10y12                                     | 1503.79 | 72.080 | 28780 | 3 | 501.93  | -11.61 |
| P66932 TIG_SALTY Trigger factor          | 6  |                | VEERELPELTEEFIK          | 239 | 15 | 5  | 18.16  | b4°b4b10°b10y11                                | 1860.94 | 96.737 | 20875 | 2 | 930.97  | -10.76 |
| P66932 TIG_SALTY Trigger factor          | 7  |                | INPAGAPNYVPGEYK          | 83  | 15 | 8  | 52.42  | b7b10b12b14y1y6y8y15                           | 1589.79 | 62.098 | 17123 | 2 | 795.40  | -3.92  |
| P66932 TIG_SALTY Trigger factor          | 8  |                | ANDIDVPSALIDSEIDVLR      | 296 | 19 | 7  | 31.67  | b4°b4b6y3y13y14y19                             | 2055.08 | 95.373 | 16384 | 2 | 1028.04 | 10.69  |
| P66932 TIG_SALTY Trigger factor          | 9  |                | MIPGFEDGVK               | 193 | 10 | 6  | 40.17  | b5b10y6y7y9y10                                 | 1092.53 | 59.065 | 15315 | 2 | 546.77  | -8.94  |
| P66932 TIG_SALTY Trigger factor          | 10 |                | NKELMDNMR                | 390 | 9  | 11 | 59.99  | b1b2*b2b3b7b8y2y3*y3y4°y4                      | 1150.54 | 35.965 | 7173  | 2 | 575.77  | 5.20   |
| P66932 TIG_SALTY Trigger factor          | 11 |                | QDVLGDLMSR               | 63  | 10 | 3  | 26.94  | b3b5y3                                         | 1133.55 | 34.909 | 13031 | 2 | 567.28  | -11.95 |
| P66932 TIG_SALTY Trigger factor          | 12 |                | YGASVR                   | 57  | 6  | 1  | 13.63  | b4                                             | 652.34  | 27.574 | 9051  | 1 | 652.34  | -2.15  |
| P66932 TIG_SALTY Trigger factor          | 13 |                | GLIEEMASAYEDPK           | 368 | 14 | 3  | 27.88  | b6b8b12                                        | 1552.72 | 71.468 | 7995  | 2 | 776.86  | 0.71   |
| P66932 TIG_SALTY Trigger factor          | 14 |                | ATSFNELMNQQA             | 420 | 12 | 3  | 22.3   | b4y3y7                                         | 1353.63 | 64.983 | 4395  | 2 | 677.32  | 13.08  |
| P66932 TIG_SALTY Trigger factor          | 15 |                | MQVSVETTQGLGR            | 0   | 13 | 3  | 20.67  | b3b6y11                                        | 1405.74 | 57.154 | 4316  | 2 | 703.37  | 19.10  |
| P66932 TIG_SALTY Trigger factor          | 16 |                | ATDFVLAMGQGR             | 181 | 12 | 3  | 22.3   | b3b10y6                                        | 1265.64 | 58.592 | 3509  | 3 | 422.55  | 5.98   |
| P66932 TIG_SALTY Trigger factor          | 17 |                | ELPELTEEFIK              | 243 | 11 | 5  | 31.32  | b3°b3b4b7°b7                                   | 1347.73 | 85.115 | 1925  | 2 | 674.37  | 19.75  |
| P66932 TIG_SALTY Trigger factor          | 18 |                | GLIEEMASAYEDPKEVIEFYSK   | 368 | 22 | 5  | 49.21  | b6b7b8y4y5                                     | 2548.18 | 82.498 | 38593 | 3 | 850.07  | -13.41 |
| P66932 TIG_SALTY Trigger factor          | 19 |                | EKINPAGAPNYVPGEYK        | 81  | 17 | 4  | 16.34  | b14y10°y10y13                                  | 1846.94 | 76.797 | 32004 | 3 | 616.32  | 2.97   |
| P66932 TIG_SALTY Trigger factor          | 20 |                | RFGVEDGSVAGLR            | 254 | 13 | 5  | 41.39  | b6b9b10y7y10                                   | 1362.70 | 49.763 | 13952 | 3 | 454.91  | -8.78  |
| P66932 TIG_SALTY Trigger factor          | 21 |                | MIPGFEDGVKGHK            | 193 | 13 | 3  | 25.44  | b3b4y3                                         | 1414.71 | 38.728 | 5470  | 3 | 472.24  | -3.37  |
| P66932 TIG_SALTY Trigger factor          | 22 |                | QVSVETTQGLGRR            | 1   | 13 | 3  | 20.67  | b10y6y11                                       | 1430.76 | 57.813 | 2256  | 3 | 477.59  | -6.14  |
| P66932 TIG_SALTY Trigger factor          | 23 |                | VKGLIEEMASAYEDPK         | 366 | 16 | 4  | 24.89  | y4y8°y8y12                                     | 1779.87 | 90.565 | 1960  | 2 | 890.44  | -7.34  |
| P66932 TIG_SALTY Trigger factor          | 24 |                | FGGNEKQALELPR            | 321 | 13 | 4  | 28.15  | b4b8°b8b9                                      | 1458.75 | 57.317 | 1785  | 2 | 729.88  | -14.64 |
| P66932 TIG_SALTY Trigger factor          | 25 | Oxidation+M(1) | MQVSVETTQGLGR            | 0   | 13 | 3  | 20.67  | b4y3y9                                         | 1421.69 | 73.411 | 1711  | 2 | 711.35  | -9.62  |
| P66932 TIG_SALTY Trigger factor          | 26 |                | ELPELTEEFIKR             | 243 | 12 | 0  | 2.82   |                                                | 1485.77 | 72.080 | 10682 | 3 | 495.93  | -12.98 |
| Q56073 DNAK_SALTY Chaperone protein dnaK | 1  |                | IINEPTAAALAYGLDKEVGNR    | 167 | 21 | 18 | 169.31 | b2b3b4b7y3y5y6y7y9y10y11°y11y12y14y15y17y19y21 | 2215.16 | 75.837 | 49416 | 3 | 739.06  | -7.05  |
| Q56073 DNAK_SALTY Chaperone protein dnaK | 2  |                | MQELAQVSQK               | 587 | 10 | 7  | 47.95  | b2*b2b3y3y5y8y10                               | 1161.59 | 37.903 | 34386 | 2 | 581.30  | -0.53  |
| Q56073 DNAK_SALTY Chaperone protein dnaK | 3  |                | QAVTNPQNTLFAIKR          | 56  | 15 | 4  | 26.24  | b15y3y5y8                                      | 1700.92 | 59.363 | 33792 | 3 | 567.64  | -14.43 |
| Q56073 DNAK_SALTY Chaperone protein dnaK | 4  |                | ASSGLNEEEIQK             | 502 | 12 | 5  | 44.96  | y4y7y9y10y12                                   | 1304.63 | 35.472 | 20761 | 2 | 652.82  | -0.66  |
| Q56073 DNAK_SALTY Chaperone protein dnaK | 5  |                | IELSSAQQTVDNLPYITADATGPK | 270 | 24 | 5  | 12.72  | b1b2b3b9y5                                     | 2532.29 | 88.391 | 19483 | 4 | 633.83  | 2.60   |

|                                                              |    |                       |                                   |     |    |    |       |                             |         |         |       |   |         |        |
|--------------------------------------------------------------|----|-----------------------|-----------------------------------|-----|----|----|-------|-----------------------------|---------|---------|-------|---|---------|--------|
| [Q56073]DNAK_SALTY Chaperone protein dnaK                    | 6  |                       | LESLVEDLVNR                       | 304 | 11 | 6  | 27.34 | b2b3b4y1y2y6                | 1286.70 | 78.439  | 12825 | 2 | 643.86  | 5.88   |
| [Q56073]DNAK_SALTY Chaperone protein dnaK                    | 7  |                       | TTPSIIAYTQDGETLVGQPAKR            | 34  | 22 | 3  | 13.45 | b11y6y20                    | 2346.22 | 69.083  | 12211 | 3 | 782.74  | -4.99  |
| [Q56073]DNAK_SALTY Chaperone protein dnaK                    | 8  |                       | QAVTNPQNTLFAIK                    | 56  | 14 | 5  | 24.75 | b3y2y11y12y14               | 1544.84 | 68.141  | 10785 | 2 | 772.93  | -0.32  |
| [Q56073]DNAK_SALTY Chaperone protein dnaK                    | 9  |                       | VLENAEGDR                         | 25  | 9  | 4  | 38.3  | b9y3y4y7                    | 1002.49 | 23.899  | 4752  | 2 | 501.75  | 8.22   |
| [Q56073]DNAK_SALTY Chaperone protein dnaK                    | 10 |                       | IIGADNGDAWLDDVK                   | 92  | 14 | 4  | 19.31 | b6*b6b8y7                   | 1486.74 | 53.203  | 17942 | 2 | 743.87  | -8.79  |
| [Q56073]DNAK_SALTY Chaperone protein dnaK                    | 11 |                       | SLGQFNLDGINPAPR                   | 452 | 15 | 5  | 24.18 | b3*b3b4*b4y12               | 1598.81 | 35.971  | 10395 | 3 | 533.61  | -12.06 |
| [Q56073]DNAK_SALTY Chaperone protein dnaK                    | 12 |                       | TTPSIIAYTQDGETLVGQPAK             | 34  | 21 | 3  | 13.89 | b8b12y11                    | 2190.08 | 93.144  | 2927  | 3 | 730.70  | -21.96 |
| [Q56073]DNAK_SALTY Chaperone protein dnaK                    | 13 |                       | TFEVLATNGDTHLGGEDFDTR             | 214 | 21 | 4  | 20.53 | b11*b11b15b20               | 2295.02 | 73.347  | 2645  | 4 | 574.51  | -13.94 |
| [Q56073]DNAK_SALTY Chaperone protein dnaK                    | 14 |                       | DVNPDEAVAIGAAYVGGVLTGDVK          | 363 | 24 | 3  | 22.02 | b13b14y5                    | 2295.19 | 76.296  | 2548  | 2 | 1148.10 | 1.70   |
| [Q56073]DNAK_SALTY Chaperone protein dnaK                    | 15 |                       | TIAVYDLGGGTFDISIIEIDEVDGEK        | 188 | 26 | 3  | 12.15 | b6b10y11                    | 2769.42 | 87.039  | 1609  | 3 | 923.81  | 18.51  |
| [Q56073]DNAK_SALTY Chaperone protein dnaK                    | 16 |                       | FEELVQTRNQGDHLLHSTR               | 528 | 19 | 4  | 14.96 | b5*b5b12y13                 | 2280.17 | 85.096  | 8884  | 3 | 760.73  | 10.49  |
| [Q56073]DNAK_SALTY Chaperone protein dnaK                    | 17 |                       | KTAEDYLGEPTVEAVITVPAYFND AQR      | 124 | 27 | 6  | 39.7  | b3b7y7y8y9y12               | 2997.51 | 89.692  | 8081  | 3 | 999.84  | 9.20   |
| [Q56073]DNAK_SALTY Chaperone protein dnaK                    | 18 |                       | KVAEFFGK                          | 351 | 8  | 4  | 33.12 | b7y4y5*y5                   | 925.50  | 77.853  | 6801  | 2 | 463.25  | -14.11 |
| [Q56073]DNAK_SALTY Chaperone protein dnaK                    | 19 | Carbamidomethyl+C(14) | GKIIGIDLGTNSCVAIMDGTQAR           | 1   | 24 | 3  | 12.72 | b17y6y12                    | 2491.23 | 71.094  | 6125  | 3 | 831.08  | -13.33 |
| [Q56073]DNAK_SALTY Chaperone protein dnaK                    | 20 |                       | ITIKASSGLNEEEIQK                  | 498 | 16 | 4  | 37.36 | b12b13y5y6                  | 1759.94 | 100.663 | 2768  | 2 | 880.47  | -4.58  |
| [Q56073]DNAK_SALTY Chaperone protein dnaK                    | 21 |                       | IIGADNGDAWLDDVKGQK                | 92  | 17 | 3  | 16.34 | b8b11y10                    | 1799.94 | 106.730 | 1640  | 3 | 600.65  | 5.83   |
| [Q56073]DNAK_SALTY Chaperone protein dnaK                    | 22 | Phosphoryl STY(9)     | IELSSAQQTVDNLPYTADATGPK           | 270 | 24 | 3  | 12.72 | b7y7y15                     | 2612.24 | 98.603  | 54567 | 4 | 653.81  | -1.31  |
| [Q56073]DNAK_SALTY Chaperone protein dnaK                    | 23 | Phosphoryl STY(9)     | QAVTNPQNTLFAIK                    | 56  | 14 | 4  | 33.05 | b5b8y7y8                    | 1624.80 | 97.929  | 1985  | 3 | 542.27  | -2.70  |
| [P65215]KDSA_SALTY 2-dehydro-3-deoxyphosphooctonate aldolase | 1  |                       | AGMAVGLAGLFLESHDPANAK             | 226 | 22 | 9  | 68.12 | b3b4b5y3y4y6*y6y7y22        | 2166.08 | 88.958  | 20687 | 3 | 722.70  | -9.47  |
| [P65215]KDSA_SALTY 2-dehydro-3-deoxyphosphooctonate aldolase | 2  | Carbamidomethyl+C(17) | VSGNSPVIFDVTHALQCR                | 189 | 18 | 10 | 43.8  | b6*b6b12*b12b13y2y4*y4y9y10 | 1999.98 | 80.154  | 10641 | 3 | 667.33  | -11.72 |
| [P65215]KDSA_SALTY 2-dehydro-3-deoxyphosphooctonate aldolase | 3  |                       | VANDLPFVFLFGGMNVLESR              | 12  | 19 | 11 | 62.51 | b2b3b5b11y2y3y4y9y10y14y19  | 2078.05 | 110.960 | 9957  | 3 | 693.35  | -13.51 |
| [P65215]KDSA_SALTY 2-dehydro-3-deoxyphosphooctonate aldolase | 4  | Carbamidomethyl+C(4)  | VILCDR                            | 162 | 6  | 1  | 13.63 | b4                          | 775.42  | 28.963  | 6315  | 2 | 388.22  | 12.36  |
| [P65215]KDSA_SALTY 2-dehydro-3-deoxyphosphooctonate aldolase | 5  |                       | GANFGYDNLVVDMLGFSVMK              | 168 | 20 | 3  | 14.39 | b4y6y9                      | 2177.08 | 75.966  | 3362  | 2 | 1089.05 | 19.96  |
| [P65215]KDSA_SALTY 2-dehydro-3-deoxyphosphooctonate aldolase | 6  |                       | IFQELK                            | 79  | 6  | 1  | 13.63 | y3                          | 777.45  | 32.410  | 2967  | 2 | 389.23  | 0.39   |
| [P65215]KDSA_SALTY 2-dehydro-3-deoxyphosphooctonate aldolase | 7  |                       | GANFGYDNLVVDMLGFSVMKK             | 168 | 21 | 3  | 20.53 | b6b10b19                    | 2305.15 | 79.118  | 25692 | 3 | 769.06  | 7.10   |
| [P65215]KDSA_SALTY 2-dehydro-3-deoxyphosphooctonate aldolase | 8  | Carbamidomethyl+C(23) | AGMAVGLAGLFLESHDPANAKC DGPSALPLAK | 226 | 33 | 3  | 16.83 | b3b5b15                     | 3275.69 | 89.642  | 5770  | 4 | 819.68  | 11.11  |
| [P65215]KDSA_SALTY 2-dehydro-3-deoxyphosphooctonate aldolase | 9  |                       | ASFDKANR                          | 55  | 8  | 3  | 40.9  | b3b4b7                      | 908.46  | 79.833  | 4749  | 1 | 908.46  | -1.34  |
| [P65215]KDSA_SALTY 2-dehydro-3-deoxyphosphooctonate aldolase | 10 |                       | KPQFVSPGQMGNIVDKFHEGGNDK          | 138 | 24 | 3  | 22.02 | b10b11y12                   | 2629.29 | 109.906 | 4362  | 3 | 877.10  | 4.09   |
| [P65215]KDSA_SALTY 2-dehydro-3-deoxyphosphooctonate aldolase | 11 | Oxidation+M(3)        | AGMAVGLAGLFLESHDPANAK             | 226 | 22 | 5  | 18.2  | b7b14y5*y5y11               | 2182.07 | 95.746  | 17623 | 3 | 728.03  | -9.85  |

|                                                             |    |                                             |                                       |     |    |    |        |                                                                   |         |         |        |   |         |        |
|-------------------------------------------------------------|----|---------------------------------------------|---------------------------------------|-----|----|----|--------|-------------------------------------------------------------------|---------|---------|--------|---|---------|--------|
| P65215 KDSA_SALTY 2-dehydro-3-deoxyphosphooctonate aldolase | 12 | Oxidation+M(8)                              | QTDLVEAMAK                            | 120 | 10 | 10 | 60.39  | b3°b3b7°b7°b7b9°b9y3y9°y9                                         | 1121.54 | 68.532  | 6213   | 2 | 561.28  | -6.42  |
| P65215 KDSA_SALTY 2-dehydro-3-deoxyphosphooctonate aldolase | 13 | Oxidation+M(13)                             | VANDLPFVLFGGMNVLESR                   | 12  | 19 | 4  | 24.13  | y3°y3y8y9                                                         | 2094.07 | 67.207  | 6100   | 3 | 698.69  | -0.58  |
| P65215 KDSA_SALTY 2-dehydro-3-deoxyphosphooctonate aldolase | 14 | Oxidation+M(8)                              | GPGLLEEGRMK                           | 70  | 9  | 4  | 45     | b5b7y4y8                                                          | 933.45  | 69.250  | 5087   | 1 | 933.45  | 13.01  |
| Q8ZP65 TPX_SALTY Probable thiol peroxidase                  | 1  |                                             | SQTVHFQGNPVTVANVIPQAGSK               | 1   | 23 | 24 | 130.76 | b2°b2b3b5°b5°b5b8b9°b9b11°b11b12°b12b16y4y5y6y7y9y10°y10y12y17y23 | 2379.24 | 65.299  | 117692 | 3 | 793.75  | -0.82  |
| Q8ZP65 TPX_SALTY Probable thiol peroxidase                  | 2  |                                             | AQAFTLVAK                             | 24  | 9  | 6  | 38.3   | b2°b2y3y4y7y9                                                     | 948.54  | 53.880  | 75184  | 2 | 474.78  | -8.43  |
| Q8ZP65 TPX_SALTY Probable thiol peroxidase                  | 3  | Carbamidomethyl+C(13)                       | VLNIFPSIDTGVCAASVR                    | 48  | 18 | 8  | 32.79  | b2b3b5y2y6y13y14y18                                               | 1919.02 | 86.002  | 59313  | 2 | 960.01  | 6.23   |
| Q8ZP65 TPX_SALTY Probable thiol peroxidase                  | 4  | Carbamidomethyl+C(2)                        | FCGAEGLSNVITLSTLR                     | 93  | 17 | 13 | 101.38 | b2b3b4b10b11°b11y3y4y5y6y12y15y17                                 | 1837.96 | 86.831  | 48395  | 2 | 919.49  | 8.90   |
| Q8ZP65 TPX_SALTY Probable thiol peroxidase                  | 5  |                                             | DLSDVLSQYAGK                          | 33  | 13 | 9  | 71.83  | b3b5y2y4y6y9y10y11y13                                             | 1382.68 | 60.182  | 41069  | 2 | 691.85  | 2.12   |
| Q8ZP65 TPX_SALTY Probable thiol peroxidase                  | 6  |                                             | NYGVEIVDGPLK                          | 116 | 12 | 5  | 32.52  | b2y4y8y10y12                                                      | 1303.69 | 65.536  | 38283  | 2 | 652.35  | 2.62   |
| Q8ZP65 TPX_SALTY Probable thiol peroxidase                  | 7  |                                             | DLSDVLSQYAGKR                         | 33  | 14 | 5  | 19.31  | b4y9°y9y11y14                                                     | 1538.78 | 55.590  | 8995   | 2 | 769.90  | 1.35   |
| Q8ZP65 TPX_SALTY Probable thiol peroxidase                  | 8  |                                             | AVIVLDENDNVIFSQLVDEITHEPDYDAALNVLK    | 133 | 34 | 6  | 22.92  | b2b3b4b10°b10y34                                                  | 3811.95 | 119.037 | 7859   | 3 | 1271.32 | 6.85   |
| Q8ZP65 TPX_SALTY Probable thiol peroxidase                  | 9  | Carbamidomethyl+C(13)                       | VLNIFPSIDTGVCAASVRK                   | 48  | 19 | 6  | 42.94  | b3y10°y10y11y13y14                                                | 2047.08 | 78.399  | 5685   | 3 | 683.03  | -10.02 |
| Q8ZP65 TPX_SALTY Probable thiol peroxidase                  | 10 |                                             | AVIVLDENDNVIFSQLVDEITHEPDYDAALNVLKA   | 133 | 35 | 20 | 153.33 | b3b4b5b7b8b11°b11b32y3y4y5y6y7y8y12y13y20y24y27y31                | 3882.98 | 120.861 | 74152  | 3 | 1295.00 | 4.78   |
| Q8ZP65 TPX_SALTY Probable thiol peroxidase                  | 11 |                                             | NNEFLKNYGVEIVDGPLK                    | 110 | 18 | 4  | 26.61  | b7b9b10y5                                                         | 2049.06 | 77.087  | 15586  | 3 | 683.69  | -1.91  |
| Q8ZP65 TPX_SALTY Probable thiol peroxidase                  | 12 | Phosphoryl STY(13)                          | MSQTVHFQGNPVTVANVIPQAGSK              | 0   | 24 | 4  | 23.01  | b5b12°b12b13                                                      | 2590.21 | 98.673  | 3326   | 4 | 648.31  | -11.12 |
| P26982 DEGP_SALTY Protease do                               | 1  |                                             | AGDVITSLNGKPISSFAALR                  | 332 | 20 | 7  | 59.33  | b3b4b5y3y4y9y16                                                   | 2017.08 | 75.641  | 71472  | 3 | 673.03  | -11.68 |
| P26982 DEGP_SALTY Protease do                               | 2  |                                             | GYVVTNNHVVDNASVIK                     | 124 | 17 | 14 | 106.74 | b2b3b6y1y2y3y6y7y8y9y10y14y16y17                                  | 1828.94 | 50.715  | 59875  | 3 | 610.32  | -11.01 |
| P26982 DEGP_SALTY Protease do                               | 3  |                                             | SDIALIQINPK                           | 160 | 12 | 10 | 64.43  | b3°b3b10y2y4°y4y5y6y7y12                                          | 1339.75 | 64.721  | 42176  | 2 | 670.38  | -5.10  |
| P26982 DEGP_SALTY Protease do                               | 4  |                                             | NLTSMVEYGQVK                          | 275 | 13 | 5  | 25.44  | b12y4y5°y5y13                                                     | 1496.75 | 58.328  | 37938  | 2 | 748.88  | 3.43   |
| P26982 DEGP_SALTY Protease do                               | 5  |                                             | GAFVSQVMPNSSAAK                       | 313 | 15 | 11 | 71.39  | b3b4b5y2y8y10y11°y11°y11y12y15                                    | 1493.75 | 53.937  | 34842  | 2 | 747.38  | 3.43   |
| P26982 DEGP_SALTY Protease do                               | 6  |                                             | VGDYTVAINPFGLETVTSGIVSALGR            | 186 | 28 | 19 | 134.06 | b2b3b5°b5b6°b6b7b8b11b12y2y3y4y5y6y9y10y11y28                     | 2750.44 | 117.252 | 30557  | 3 | 917.48  | 1.15   |
| P26982 DEGP_SALTY Protease do                               | 7  |                                             | AQVGTMPVGSK                           | 352 | 11 | 9  | 53.01  | b2°b2b6y5°y5y8y9y10y11                                            | 1074.56 | 35.534  | 30210  | 2 | 537.78  | -4.32  |
| P26982 DEGP_SALTY Protease do                               | 8  |                                             | SGLNVENYENFIQTDAAINR                  | 214 | 20 | 10 | 42.47  | b11y1y2y3y5y6y8°y8y12y20                                          | 2268.11 | 78.402  | 26701  | 2 | 1134.56 | 11.19  |
| P26982 DEGP_SALTY Protease do                               | 9  | Carbamidomethyl+C(13);Carbamidomethyl+C(25) | NFQQFFGDDSPFCQDGSPPFNPFQGGGNGGNGGQQQK | 71  | 39 | 5  | 24.22  | b2b4b5y6y13                                                       | 4240.79 | 91.648  | 3810   | 3 | 1414.27 | 8.75   |
| P26982 DEGP_SALTY Protease do                               | 10 |                                             | GELGIMGTELNSELAK                      | 289 | 16 | 5  | 17.18  | b2°b2b3b15y11                                                     | 1661.85 | 102.199 | 1582   | 3 | 554.62  | 7.13   |
| P26982 DEGP_SALTY Protease do                               | 11 |                                             | LADSDALR                              | 178 | 8  | 3  | 33.12  | b3b4y5                                                            | 860.44  | 32.972  | 19827  | 2 | 430.72  | -7.09  |
| P26982 DEGP_SALTY Protease do                               | 12 |                                             | ISLGLLR                               | 363 | 7  | 4  | 53.73  | y3y4y5y6                                                          | 771.50  | 69.116  | 17213  | 2 | 386.25  | -15.82 |
| P26982 DEGP_SALTY Protease do                               | 13 |                                             | NIAELR                                | 443 | 6  | 1  | 13.63  | y4                                                                | 715.40  | 52.539  | 8140   | 1 | 715.40  | -9.81  |
| P26982 DEGP_SALTY Protease do                               | 14 |                                             | ANSPAAQIGLK                           | 418 | 11 | 6  | 31.32  | b4°b4b6°b6b7°b7                                                   | 1069.62 | 32.588  | 6307   | 3 | 357.21  | 16.21  |
| P26982 DEGP_SALTY Protease do                               | 15 |                                             | VMPSVVVSINVEGSTTVNTPR                 | 48  | 20 | 5  | 14.39  | b11b15°b15y11°y11                                                 | 2087.07 | 103.354 | 3188   | 2 | 1044.04 | -3.51  |
| P26982 DEGP_SALTY Protease do                               | 16 |                                             | KGDVVIIGANQQPVK                       | 429 | 14 | 8  | 50.76  | b5b7y5y6°y6y8°y8y10                                               | 1466.83 | 39.259  | 16049  | 2 | 733.92  | 1.58   |



|                                             |    |                                                      |                                 |     |    |    |        |                                                |         |         |        |   |         |        |
|---------------------------------------------|----|------------------------------------------------------|---------------------------------|-----|----|----|--------|------------------------------------------------|---------|---------|--------|---|---------|--------|
| P26982 DEGP_SALTY Protease do               | 17 |                                                      | RGELGIMGTELNSELAK               | 288 | 17 | 3  | 23.33  | b5b6y8                                         | 1817.95 | 69.431  | 13407  | 2 | 909.48  | 2.55   |
| P26982 DEGP_SALTY Protease do               | 18 |                                                      | FDAKVVVGK                       | 149 | 8  | 4  | 36.13  | b4°b4b7y3                                      | 863.49  | 35.937  | 13203  | 2 | 432.25  | -4.31  |
| P26982 DEGP_SALTY Protease do               | 19 |                                                      | GDVIIGANQQPVKNIAELR             | 430 | 19 | 3  | 14.96  | b11b13y3                                       | 2035.11 | 65.920  | 9289   | 3 | 679.04  | -8.88  |
| P26982 DEGP_SALTY Protease do               | 20 |                                                      | GELGIMGTELNSELAKAMK             | 289 | 19 | 9  | 39.17  | b8b13b14°b14b17°b17°b17y3y14                   | 1992.01 | 94.510  | 3243   | 3 | 664.68  | -0.49  |
| P26982 DEGP_SALTY Protease do               | 21 |                                                      | VTNNHVVDNASVIK                  | 127 | 14 | 2  | 7.28   | b6°b6                                          | 1509.79 | 50.728  | 1612   | 2 | 755.40  | -6.06  |
| P67904 RS10_SALTY 30S ribosomal protein S10 | 1  |                                                      | LIDQSTAEIVETAKR                 | 16  | 15 | 14 | 123.33 | b2b3y1y4y5y6y7y8y9y10y11°y11y13y15             | 1673.88 | 52.777  | 102657 | 3 | 558.63  | -14.22 |
| P67904 RS10_SALTY 30S ribosomal protein S10 | 2  |                                                      | LIDQSTAEIVETAK                  | 16  | 14 | 13 | 98.7   | b2b7b9b10y3y4°y4y5y9y10y11*y11y14              | 1517.81 | 56.215  | 71683  | 2 | 759.41  | 1.93   |
| P67904 RS10_SALTY 30S ribosomal protein S10 | 3  |                                                      | LVDIVEPTEK                      | 72  | 10 | 11 | 74.41  | b2b3y2°y2y3y4y5°y5y6y8y10                      | 1142.63 | 52.478  | 44088  | 2 | 571.82  | -3.21  |
| P67904 RS10_SALTY 30S ribosomal protein S10 | 4  |                                                      | FTVLISPHVNK                     | 48  | 11 | 5  | 56.02  | b7y4y5y6y7                                     | 1254.69 | 58.859  | 56945  | 3 | 418.90  | -20.72 |
| P67904 RS10_SALTY 30S ribosomal protein S10 | 5  |                                                      | RLVDIVEPTEK                     | 71  | 11 | 12 | 131.72 | b3b4b5b7b10y4°y4y5°y5y6y7y8                    | 1298.73 | 51.311  | 53662  | 2 | 649.87  | 0.38   |
| P67904 RS10_SALTY 30S ribosomal protein S10 | 6  |                                                      | GPIPLPTRK                       | 37  | 9  | 3  | 38.3   | y4y5y6                                         | 978.60  | 43.619  | 30928  | 2 | 489.80  | -7.55  |
| P67904 RS10_SALTY 30S ribosomal protein S10 | 7  |                                                      | DQSTAEIVETAKR                   | 18  | 13 | 1  | 7.26   | b3                                             | 1447.74 | 52.807  | 4802   | 2 | 724.37  | 0.34   |
| P0A1P8 GLRX1_SALTY Glutaredoxin-1           | 1  |                                                      | TVGKPVETVPQIFVDQK               | 50  | 17 | 8  | 48.96  | b9y2y3y5y6y8y13y17                             | 1885.03 | 65.632  | 50605  | 3 | 629.02  | -6.67  |
| P0A1P8 GLRX1_SALTY Glutaredoxin-1           | 2  | Carbamidomethyl+C(11)<br>;Carbamidomethyl+C(14)<br>) | MFTVIFGRPGCPYCVR                | 0   | 16 | 7  | 30.83  | b2b3°b3b4y12y14y16                             | 1959.93 | 77.195  | 35581  | 3 | 653.98  | -3.74  |
| P0A1P8 GLRX1_SALTY Glutaredoxin-1           | 3  |                                                      | YIDIHAEGITK                     | 34  | 11 | 5  | 50.57  | b3b7b8b10°b10                                  | 1259.66 | 64.399  | 246866 | 2 | 630.33  | -3.88  |
| P0A1P8 GLRX1_SALTY Glutaredoxin-1           | 4  | Carbamidomethyl+C(11)<br>;Carbamidomethyl+C(14)<br>) | MFTVIFGRPGCPYCVRAK              | 0   | 18 | 3  | 15.6   | b7y6y13                                        | 2159.08 | 85.819  | 2137   | 3 | 720.37  | 5.99   |
| P0A1P8 GLRX1_SALTY Glutaredoxin-1           | 5  | Carbamidomethyl+C(10)<br>;Carbamidomethyl+C(13)<br>) | FTVIFGRPGCPYCVRAK               | 1   | 17 | 3  | 16.34  | b11y8y10                                       | 2028.00 | 73.649  | 1966   | 3 | 676.67  | -14.57 |
| P0A1P8 GLRX1_SALTY Glutaredoxin-1           | 6  | Carbamidomethyl+C(11)<br>;Carbamidomethyl+C(14)<br>) | MFTVIFGRPGCPYCV                 | 0   | 15 | 1  | 7.25   | y11                                            | 1803.83 | 77.244  | 19551  | 3 | 601.95  | -2.64  |
| P0A1P8 GLRX1_SALTY Glutaredoxin-1           | 7  |                                                      | PQIFVDQK                        | 59  | 8  | 1  | 7.28   | b3                                             | 974.54  | 65.600  | 9502   | 1 | 974.54  | 7.95   |
| Q7CPE2 ATPB_SALTY ATP synthase subunit beta | 1  |                                                      | QLDPLVVQGEHYDTAR                | 343 | 16 | 16 | 133.74 | b2°b2y3°y3y4y5y7y9y10y11y12y13y14°y14y16°y16   | 1840.90 | 58.444  | 70162  | 3 | 614.30  | -11.67 |
| Q7CPE2 ATPB_SALTY ATP synthase subunit beta | 2  |                                                      | AAPSYEELSNSQELLETK              | 112 | 20 | 11 | 63.73  | b8b12y1y2y3y4y12y13y14y18y20                   | 2179.10 | 74.582  | 63413  | 2 | 1090.05 | 11.88  |
| Q7CPE2 ATPB_SALTY ATP synthase subunit beta | 3  |                                                      | VALTGLTMAEK                     | 219 | 11 | 9  | 84.82  | b2y3y5y7y8y9°y9y10y11                          | 1133.62 | 59.923  | 56255  | 2 | 567.31  | -6.68  |
| Q7CPE2 ATPB_SALTY ATP synthase subunit beta | 4  |                                                      | GIMEGEYDHLPEQAFYMVGSIDE<br>AVEK | 429 | 27 | 7  | 25.72  | b5y3y6°y6y9y12y27                              | 3057.41 | 100.548 | 55539  | 3 | 1019.81 | 9.42   |
| Q7CPE2 ATPB_SALTY ATP synthase subunit beta | 5  | Carbamidomethyl+C(6)                                 | VIDLMCPFAK                      | 132 | 10 | 7  | 70.61  | b2b3b6y4y5y6y8                                 | 1193.60 | 81.536  | 43462  | 2 | 597.30  | -3.99  |
| Q7CPE2 ATPB_SALTY ATP synthase subunit beta | 6  |                                                      | NIAIEHSGYSVFAGVGER              | 165 | 18 | 5  | 34.94  | b2b6b9b12b14                                   | 1905.92 | 58.083  | 41760  | 3 | 635.98  | -14.54 |
| Q7CPE2 ATPB_SALTY ATP synthase subunit beta | 7  |                                                      | MPSAVGYQPTLAEEMGVLQER           | 261 | 21 | 15 | 44.92  | b5°b5b10b12°b12°b12b21y3°y3y6y11*y11y13*y13y21 | 2306.14 | 82.414  | 38571  | 2 | 1153.58 | 12.70  |
| Q7CPE2 ATPB_SALTY ATP synthase subunit beta | 8  |                                                      | YTLAGTEVSALLGR                  | 247 | 14 | 9  | 42.46  | b2°b2b10y2y3y6y7y10y14                         | 1450.79 | 80.780  | 38278  | 2 | 725.90  | -2.10  |
| Q7CPE2 ATPB_SALTY ATP synthase subunit beta | 9  |                                                      | VGLFGGAGVGK                     | 145 | 11 | 5  | 31.32  | y2y4y7y8y11                                    | 961.54  | 59.633  | 37063  | 2 | 481.27  | -9.97  |

|                                               |    |                       |                                    |     |    |    |        |                                          |         |         |       |   |         |        |
|-----------------------------------------------|----|-----------------------|------------------------------------|-----|----|----|--------|------------------------------------------|---------|---------|-------|---|---------|--------|
| Q7CPE2 ATPB_SALTY ATP synthase subunit beta   | 10 |                       | GLDVKDLEHPIEVPVGK                  | 65  | 17 | 7  | 39.2   | b3b6b9b12y2y4y17                         | 1844.99 | 68.022  | 32686 | 3 | 615.67  | -12.11 |
| Q7CPE2 ATPB_SALTY ATP synthase subunit beta   | 11 |                       | QIASLGIYPAVDPLDSTSR                | 324 | 19 | 7  | 46.24  | y4y11y12y14°y14y15y19                    | 2003.06 | 81.322  | 30562 | 2 | 1002.03 | 5.85   |
| Q7CPE2 ATPB_SALTY ATP synthase subunit beta   | 12 |                       | VYDALEVQNGNEK                      | 25  | 13 | 4  | 20.67  | b3y8y11y13                               | 1478.72 | 45.183  | 16830 | 2 | 739.87  | 7.84   |
| Q7CPE2 ATPB_SALTY ATP synthase subunit beta   | 13 |                       | TVNMMELIR                          | 156 | 9  | 4  | 53.29  | b4y3y5y7                                 | 1106.56 | 76.652  | 53887 | 2 | 553.79  | -6.07  |
| Q7CPE2 ATPB_SALTY ATP synthase subunit beta   | 14 |                       | FLSQPFFVAEVFTGSPGK                 | 399 | 18 | 9  | 62.31  | b3b4b6b8y3y5y11y13°y13                   | 1958.03 | 100.427 | 33116 | 2 | 979.52  | 10.41  |
| Q7CPE2 ATPB_SALTY ATP synthase subunit beta   | 15 |                       | VSLVYQGMNEPPGNR                    | 202 | 15 | 4  | 31.85  | b11b14y9y10                              | 1660.81 | 55.172  | 30462 | 2 | 830.91  | -2.28  |
| Q7CPE2 ATPB_SALTY ATP synthase subunit beta   | 16 |                       | TIAMGSSDGLR                        | 53  | 11 | 3  | 24.33  | b3b10y10                                 | 1107.53 | 43.863  | 19976 | 2 | 554.27  | -18.52 |
| Q7CPE2 ATPB_SALTY ATP synthase subunit beta   | 17 |                       | DVLLFVDNIYR                        | 236 | 11 | 3  | 27.34  | b10y4y5                                  | 1366.72 | 91.862  | 7490  | 2 | 683.86  | -15.09 |
| Q7CPE2 ATPB_SALTY ATP synthase subunit beta   | 18 |                       | IMNVLGEPVDMK                       | 87  | 12 | 3  | 22.3   | b3y6y10                                  | 1345.68 | 69.892  | 4859  | 2 | 673.35  | -2.00  |
| Q7CPE2 ATPB_SALTY ATP synthase subunit beta   | 19 |                       | IMNVLGEPVDMKGEIGEEER               | 87  | 20 | 3  | 23.81  | y5y8y9                                   | 2245.07 | 70.252  | 13539 | 3 | 749.03  | -6.85  |
| Q7CPE2 ATPB_SALTY ATP synthase subunit beta   | 20 |                       | EGNDFYHEMTDSNVIDKVSLSVYG QMNEPPGNR | 185 | 32 | 3  | 16.96  | y5y11y15                                 | 3655.64 | 85.409  | 10740 | 4 | 914.66  | -1.74  |
| Q7CPE2 ATPB_SALTY ATP synthase subunit beta   | 21 | Carbamidomethyl+C(26) | AAPSYEELSNSQELLETGIKVIDLM CPFAK    | 112 | 30 | 7  | 56.79  | b3b7b10y4y5y6y7                          | 3353.67 | 121.395 | 9220  | 3 | 1118.56 | 2.33   |
| Q7CPE2 ATPB_SALTY ATP synthase subunit beta   | 22 |                       | IVQVIGAVVDVEFPQDAVPRVYD ALEVQNGNEK | 5   | 33 | 3  | 22.86  | y5y6y26                                  | 3610.82 | 115.732 | 2066  | 3 | 1204.28 | -14.60 |
| Q7CPE2 ATPB_SALTY ATP synthase subunit beta   | 23 | Phosphoryl STY(4)     | VALTGLTMAEK                        | 219 | 11 | 4  | 35.34  | b7b10y7y9                                | 1213.59 | 73.254  | 8643  | 2 | 607.30  | 5.93   |
| Q7CPE2 ATPB_SALTY ATP synthase subunit beta   | 24 | Oxidation+M(4)        | TIAMGSSDGLR                        | 53  | 11 | 3  | 27.34  | b5b6y6                                   | 1123.56 | 98.445  | 1800  | 1 | 1123.56 | 13.69  |
| Q7CPE2 ATPB_SALTY ATP synthase subunit beta   | 25 |                       | PSAVGYQPTLAEEMGVLQER               | 262 | 20 | 4  | 30.04  | b3b6b7b13                                | 2175.10 | 82.458  | 6502  | 3 | 725.70  | 9.54   |
| Q7CPE2 ATPB_SALTY ATP synthase subunit beta   | 26 |                       | NIAIEHSGYSVF                       | 165 | 12 | 0  | 5.24   |                                          | 1336.64 | 58.037  | 5776  | 3 | 446.22  | -9.04  |
| Q7CPE2 ATPB_SALTY ATP synthase subunit beta   | 27 |                       | DVKDLEHPIEVPVGK                    | 67  | 15 | 6  | 61.96  | b6b7b8°b8b9b10                           | 1674.89 | 68.021  | 3025  | 3 | 558.97  | -8.02  |
| P0A7K0 RL11_SALTY 50S ribosomal protein L11   | 1  |                       | AQLQEIAQTK                         | 103 | 10 | 16 | 100.08 | b2*b2b3b6y1y2y3*y3y5y6 y7*y7y8*y8y9y10   | 1129.62 | 39.699  | 84180 | 2 | 565.31  | -5.30  |
| P0A7K0 RL11_SALTY 50S ribosomal protein L11   | 2  |                       | AADMTGADIEAMTR                     | 113 | 14 | 7  | 56.77  | b2y4y6y7y8y9y14                          | 1452.65 | 58.127  | 56944 | 2 | 726.83  | 3.61   |
| P0A7K0 RL11_SALTY 50S ribosomal protein L11   | 3  |                       | GLPIPVVITVYADR                     | 51  | 14 | 3  | 19.31  | b4y3y10                                  | 1512.88 | 92.002  | 51385 | 2 | 756.94  | 1.53   |
| P0A7K0 RL11_SALTY 50S ribosomal protein L11   | 4  |                       | TPPAAVLLK                          | 72  | 9  | 5  | 46.08  | b2y3y5y7y9                               | 909.57  | 54.902  | 47072 | 2 | 455.29  | -10.67 |
| P0A7K0 RL11_SALTY 50S ribosomal protein L11   | 5  | Carbamidomethyl+C(29) | LQVAAGMANPSPPVGPALGQQG VNIMEFCK    | 10  | 30 | 6  | 19.35  | b3b7b15y6°y6y14                          | 3081.58 | 111.276 | 9757  | 4 | 771.15  | 16.56  |
| P0A7K0 RL11_SALTY 50S ribosomal protein L11   | 6  |                       | SGSGKPNK                           | 87  | 8  | 3  | 36.13  | b4b6y7                                   | 774.41  | 40.177  | 2585  | 1 | 774.41  | -5.91  |
| P65882 PURA_SALTY Adenylosuccinate synthetase | 1  | Carbamidomethyl+C(7)  | LLLSEACPLILDYHVALDNAR              | 97  | 21 | 14 | 69.26  | b2b7y3y6°y6y9y10°y10*y10y11*y11y15y17y21 | 2396.25 | 92.358  | 28852 | 3 | 799.42  | -5.09  |
| P65882 PURA_SALTY Adenylosuccinate synthetase | 2  |                       | EVTTTPLAADDWK                      | 354 | 13 | 8  | 34.11  | b5°b5y1y5y7°y7y11y13                     | 1446.71 | 77.071  | 22967 | 2 | 723.86  | 1.77   |
| P65882 PURA_SALTY Adenylosuccinate synthetase | 3  |                       | IEELTGVPIDIISTGPDR                 | 402 | 18 | 7  | 15.6   | b2b4°b4y3°y3y5°y5                        | 1925.05 | 103.574 | 20596 | 2 | 963.03  | 12.11  |
| P65882 PURA_SALTY Adenylosuccinate synthetase | 4  | Carbamidomethyl+C(19) | VGAGPFPTELFDETGEFLCK               | 273 | 20 | 7  | 44.64  | b6b9y4y6y7y8y20                          | 2214.08 | 100.775 | 19083 | 2 | 1107.54 | 14.89  |

|                                                   |    |                       |                                   |     |    |    |       |                                    |         |         |        |   |         |        |
|---------------------------------------------------|----|-----------------------|-----------------------------------|-----|----|----|-------|------------------------------------|---------|---------|--------|---|---------|--------|
| [P65882]PURA_SALTY Adenylosuccinate synthetase    | 5  |                       | VLDDTMAVADILTSMVVDVSDLLDQAR       | 186 | 27 | 14 | 93.81 | b2b7b8b9b13y3y4y5y6y8°y8y10y11°y11 | 2905.45 | 138.252 | 7721   | 3 | 969.16  | -0.67  |
| [P65882]PURA_SALTY Adenylosuccinate synthetase    | 6  |                       | GVEPIYETMPGWSESTFGVK              | 367 | 20 | 7  | 28.05 | b2b7b10b12y3y11°y11                | 2214.05 | 86.650  | 4818   | 3 | 738.69  | 5.51   |
| [P65882]PURA_SALTY Adenylosuccinate synthetase    | 7  |                       | LKEVMEYHNFQLVNYK                  | 161 | 17 | 5  | 16.34 | b6b10*b10y4y17                     | 2218.09 | 113.643 | 4534   | 2 | 1109.55 | -2.97  |
| [P65882]PURA_SALTY Adenylosuccinate synthetase    | 8  |                       | ENVTSIINGNVVLSPSALMKEMKELEDR      | 62  | 28 | 4  | 14.93 | b3b9y4y16                          | 3059.58 | 105.848 | 2272   | 3 | 1020.53 | 1.60   |
| [P65882]PURA_SALTY Adenylosuccinate synthetase    | 9  |                       | AEAVDYQK                          | 178 | 8  | 5  | 36.13 | b4b6y7°y7*y7                       | 923.45  | 62.751  | 25450  | 2 | 462.23  | 6.61   |
| [P65882]PURA_SALTY Adenylosuccinate synthetase    | 10 |                       | GNNVVVLGTQWGDEGK                  | 1   | 16 | 7  | 34.82 | b10°b10b13*b13y6y9y13              | 1672.82 | 82.758  | 12899  | 3 | 558.28  | -4.38  |
| [P65882]PURA_SALTY Adenylosuccinate synthetase    | 11 |                       | YQGGHNAGHTLVINGEK                 | 33  | 17 | 4  | 23.33 | b12y13y14*y14                      | 1794.90 | 86.543  | 3580   | 2 | 897.95  | 7.69   |
| [P65882]PURA_SALTY Adenylosuccinate synthetase    | 12 |                       | EVMEYHNFQLVNYK                    | 163 | 15 | 4  | 18.16 | b11y6*y6y9                         | 1976.90 | 85.175  | 1893   | 3 | 659.64  | -8.64  |
| [P65882]PURA_SALTY Adenylosuccinate synthetase    | 13 |                       | VLDDTMAVADILTSMVVDVSDLLDQARQR     | 186 | 29 | 5  | 36.37 | b4b5b6b9°b9                        | 3189.61 | 110.048 | 11223  | 3 | 1063.88 | -0.77  |
| [P65882]PURA_SALTY Adenylosuccinate synthetase    | 14 |                       | GNNVVVLGTQWGDEGKGK                | 1   | 18 | 4  | 24.52 | y11y12*y12y14                      | 1857.93 | 59.413  | 8510   | 3 | 619.98  | -8.61  |
| [P65882]PURA_SALTY Adenylosuccinate synthetase    | 15 |                       | EVTTPLAADDWKGVVEPIYETMPGWSESTFGVK | 354 | 33 | 5  | 13.31 | b4°b4b15y6y10                      | 3641.78 | 93.948  | 7728   | 3 | 1214.60 | 11.06  |
| [P65882]PURA_SALTY Adenylosuccinate synthetase    | 16 |                       | MGNNVVVLGTQWGDEGKGK               | 0   | 19 | 4  | 41.17 | b3b4b7b8                           | 1988.99 | 73.405  | 3990   | 3 | 663.67  | 3.93   |
| [P65882]PURA_SALTY Adenylosuccinate synthetase    | 17 |                       | AIGTTGRGIGPAYEDK                  | 125 | 16 | 7  | 66.04 | y5y6y7y8y11y13°y13                 | 1605.83 | 69.793  | 2708   | 3 | 535.95  | 1.44   |
| [P65882]PURA_SALTY Adenylosuccinate synthetase    | 18 | Phosphoryl STY()      | ENVTSIINGNVVLSPSALMKEMK           | 62  | 23 | 3  | 13.06 | b3y5y18                            | 2497.20 | 60.921  | 215377 | 3 | 833.07  | -12.22 |
| [P65882]PURA_SALTY Adenylosuccinate synthetase    | 19 | Oxidation+M(19)       | ENVTSIINGNVVLSPSALMKEMKELEDR      | 62  | 28 | 3  | 21.93 | b10y7y8                            | 3075.53 | 133.506 | 5601   | 3 | 1025.85 | -12.15 |
| [P14062]6PGD_SALTY 6-phohogluconate dehydrogenase | 1  | Carbamidomethyl+C(11) | IAAVAEDGEPCTYIGADGAGHYVK          | 158 | 25 | 6  | 32.32 | b2b3b4y10y13y21                    | 2563.21 | 61.168  | 30722  | 3 | 855.08  | -0.19  |
| [P14062]6PGD_SALTY 6-phohogluconate dehydrogenase | 2  |                       | AAVLPANLIQAQR                     | 432 | 13 | 5  | 32.35 | b3y4y5y9y13                        | 1364.80 | 65.279  | 16364  | 2 | 682.90  | -2.15  |
| [P14062]6PGD_SALTY 6-phohogluconate dehydrogenase | 3  |                       | IVSYAQGFSQLR                      | 329 | 12 | 8  | 68.99 | b2b10y6y7y8y9y10y12                | 1368.73 | 63.298  | 15319  | 2 | 684.87  | 1.34   |
| [P14062]6PGD_SALTY 6-phohogluconate dehydrogenase | 4  |                       | WTSQSALDLGEPLSLITESVFAR           | 264 | 23 | 10 | 37.64 | b11°b11y1y3y5y6°y6y7°y7y23         | 2520.30 | 117.943 | 13573  | 3 | 840.77  | 0.97   |
| [P14062]6PGD_SALTY 6-phohogluconate dehydrogenase | 5  |                       | ITDAYAENADIANLLLAPYFKK            | 373 | 22 | 4  | 19.97 | b2b5b12b14                         | 2454.30 | 98.541  | 8749   | 3 | 818.77  | 3.98   |
| [P14062]6PGD_SALTY 6-phohogluconate dehydrogenase | 6  |                       | ELSAEGFNFIGTGVSGGEEGALK           | 113 | 23 | 7  | 28.28 | b2b6b7b11*b11y9y11                 | 2269.12 | 78.403  | 5944   | 3 | 757.04  | 7.42   |
| [P14062]6PGD_SALTY 6-phohogluconate dehydrogenase | 7  |                       | LVPYYTVK                          | 50  | 8  | 5  | 33.12 | b2b5y5y6y8                         | 982.56  | 52.517  | 5235   | 2 | 491.78  | -2.42  |
| [P14062]6PGD_SALTY 6-phohogluconate dehydrogenase | 8  |                       | ITDAYAENADIANLLLAPYFK             | 373 | 21 | 4  | 13.89 | b7b11*b11y3                        | 2326.23 | 126.227 | 2068   | 3 | 776.08  | 13.01  |
| [P14062]6PGD_SALTY 6-phohogluconate dehydrogenase | 9  |                       | GDIIDGGNTFFQDTIRR                 | 93  | 18 | 4  | 22.76 | b3b9b13°b13                        | 2038.02 | 107.107 | 1827   | 3 | 680.01  | -8.98  |
| [P14062]6PGD_SALTY 6-phohogluconate dehydrogenase | 10 |                       | DVVAYAVQNGIPVPTFSAAVAYYDSYR       | 405 | 27 | 7  | 39.7  | b4b7b8b9°b9y3y10                   | 2936.47 | 134.560 | 1685   | 3 | 979.50  | 8.65   |
| [P14062]6PGD_SALTY 6-phohogluconate dehydrogenase | 11 |                       | MVHNGIEYGDMQLIAEAYSLLK            | 183 | 22 | 3  | 13.45 | b5b7y8                             | 2495.23 | 107.474 | 14608  | 3 | 832.41  | -0.29  |
| [P14062]6PGD_SALTY 6-phohogluconate dehydrogenase | 12 |                       | DEDGNYLVDVILDEAANK                | 242 | 18 | 6  | 34.94 | y3y5y8°y8y15°y15                   | 1992.93 | 55.618  | 8631   | 3 | 664.98  | -6.13  |
| [P14062]6PGD_SALTY 6-phohogluconate dehydrogenase | 13 |                       | DAYELVAPILTK                      | 146 | 12 | 3  | 32.52 | b3b5b9                             | 1332.74 | 81.020  | 8184   | 2 | 666.87  | -2.11  |
| [P14062]6PGD_SALTY 6-phohogluconate dehydrogenase | 14 |                       | IADEYQQALR                        | 395 | 10 | 6  | 72.37 | b4b5b6b7y7y8                       | 1206.59 | 43.818  | 2683   | 2 | 603.80  | -15.38 |

|                                                   |    |                                          |                                 |     |    |    |        |                                            |         |         |       |   |         |        |
|---------------------------------------------------|----|------------------------------------------|---------------------------------|-----|----|----|--------|--------------------------------------------|---------|---------|-------|---|---------|--------|
| [P14062]6PGD_SALTY 6-phohogluconate dehydrogenase | 15 |                                          | QQIGVVGMAVMGR                   | 3   | 13 | 4  | 39.34  | b4y7y8y9                                   | 1345.69 | 63.289  | 2620  | 2 | 673.35  | -15.42 |
| [P14062]6PGD_SALTY 6-phohogluconate dehydrogenase | 16 |                                          | TEEVIAENPGK                     | 38  | 11 | 3  | 31.32  | b3b8b9                                     | 1186.59 | 91.052  | 2412  | 2 | 593.80  | -5.14  |
| [P14062]6PGD_SALTY 6-phohogluconate dehydrogenase | 17 |                                          | GYTVSVFNR                       | 25  | 9  | 5  | 54.54  | b3b4b5b8°b8                                | 1042.54 | 28.897  | 1717  | 2 | 521.77  | 6.67   |
| [P14062]6PGD_SALTY 6-phohogluconate dehydrogenase | 18 | Phosphoryl STY(3)                        | GPSIMPGGQK                      | 136 | 10 | 3  | 28.7   | b7y7y8                                     | 1051.46 | 30.226  | 3237  | 2 | 526.23  | 0.70   |
| [P14062]6PGD_SALTY 6-phohogluconate dehydrogenase | 19 | Phosphoryl STY(5)                        | EFVESLETPRR                     | 58  | 11 | 3  | 24.33  | b4b10_H3PO4 b10y7                          | 1442.67 | 92.785  | 1632  | 2 | 721.84  | 4.91   |
| [P14062]6PGD_SALTY 6-phohogluconate dehydrogenase | 20 | Oxidation+M()                            | QQIGVVGMAVMGR                   | 3   | 13 | 4  | 28.15  | b3*b3b4b8                                  | 1361.69 | 98.397  | 2446  | 2 | 681.35  | -12.46 |
| [P63411]ACKA_SALTY Acetate kinase                 | 1  | Carbamidomethyl+C(19)                    | FAIIDAVNGDEYLSGLAECFHLPEAR      | 17  | 26 | 14 | 84.6   | b2b3b5y1y2y3y4y10y11y12y13y14y19y26        | 2907.40 | 105.307 | 37172 | 3 | 969.81  | 1.68   |
| [P63411]ACKA_SALTY Acetate kinase                 | 2  |                                          | EGTRPAVVIPTNEELVIAQDASR         | 374 | 23 | 15 | 112.85 | b8°b8b9b14b15y3y5y6y7y11*y11y13y14y15y23   | 2465.29 | 69.748  | 31194 | 3 | 822.44  | -2.38  |
| [P63411]ACKA_SALTY Acetate kinase                 | 3  | Carbamidomethyl+C(7)                     | LVLVLNCGSSSLK                   | 4   | 13 | 8  | 39.25  | b2b3b4y2y8°y8y9y13                         | 1389.77 | 67.735  | 26214 | 2 | 695.39  | -5.71  |
| [P63411]ACKA_SALTY Acetate kinase                 | 4  | Carbamidomethyl+C(14)                    | ESGLGLTEVTSDCR                  | 272 | 15 | 7  | 51.74  | b12y2y8y9y10y11y15                         | 1636.80 | 72.678  | 15974 | 2 | 818.90  | 6.56   |
| [P63411]ACKA_SALTY Acetate kinase                 | 5  |                                          | NVAVFDTAHQTMPEESYLYALPYSLYK     | 144 | 28 | 3  | 11.71  | b11y6y17                                   | 3297.61 | 99.460  | 11542 | 3 | 1099.88 | 9.55   |
| [P63411]ACKA_SALTY Acetate kinase                 | 6  |                                          | LDAVVFTGGIGENAAMVR              | 324 | 18 | 7  | 22.76  | b2°b2y6*y6y12y14*y14                       | 1819.92 | 81.934  | 2645  | 3 | 607.31  | -11.81 |
| [P63411]ACKA_SALTY Acetate kinase                 | 7  | Carbamidomethyl+C(1)                     | CVDTSMGLTPLEGLVMGTR             | 224 | 19 | 9  | 62.51  | b3b11b13y4y5y10°y10y11y13                  | 2037.02 | 95.559  | 27710 | 2 | 1019.01 | 20.08  |
| [P63411]ACKA_SALTY Acetate kinase                 | 8  |                                          | YGAHGTSHFYVTQEAAK               | 178 | 17 | 5  | 26.18  | b3b7b9y6°y6                                | 1866.92 | 89.593  | 4466  | 2 | 933.96  | 21.64  |
| [P63411]ACKA_SALTY Acetate kinase                 | 9  | Carbamidomethyl+C(19)                    | FAIIDAVNGDEYLSGLAECFHLPEARIK    | 17  | 28 | 3  | 17.73  | b8b13b15                                   | 3148.60 | 99.045  | 28026 | 4 | 787.90  | 6.44   |
| [P63411]ACKA_SALTY Acetate kinase                 | 10 |                                          | RYGAHGTSHFYVTQEAAK              | 177 | 18 | 5  | 23     | b8b9°b9y9*y9                               | 2022.98 | 96.940  | 8207  | 2 | 1011.99 | -1.27  |
| [P63411]ACKA_SALTY Acetate kinase                 | 11 |                                          | DKNVAVFDTAHQTMPEESYLYALPYSLYK   | 142 | 30 | 4  | 17.29  | b8*b8b10b12                                | 3540.67 | 96.054  | 7884  | 4 | 885.92  | -9.38  |
| [P63411]ACKA_SALTY Acetate kinase                 | 12 |                                          | YIGSYTALMDGRDLDAVVFTGGIGENAAMVR | 312 | 30 | 3  | 11.39  | b17y4y10                                   | 3147.61 | 78.929  | 7059  | 4 | 787.66  | 14.35  |
| [P63411]ACKA_SALTY Acetate kinase                 | 13 |                                          | LGVLGFEVDHERNLAAR               | 348 | 17 | 4  | 23.33  | b10b11°b11y13                              | 1896.00 | 67.666  | 6768  | 2 | 948.50  | -6.76  |
| [P63411]ACKA_SALTY Acetate kinase                 | 14 |                                          | ELSLGKLGVLGFEVDHER              | 342 | 18 | 4  | 15.6   | b3°b3b16y7                                 | 1998.04 | 111.852 | 2916  | 3 | 666.69  | -12.40 |
| [P63411]ACKA_SALTY Acetate kinase                 | 15 | Carbamidomethyl+C(18)<br>;Oxidation+M(1) | MLTKESGLLGLTEVTSDCR             | 268 | 19 | 3  | 14.96  | b3b6y11                                    | 2126.03 | 85.387  | 42722 | 4 | 532.26  | -6.89  |
| [P63411]ACKA_SALTY Acetate kinase                 | 16 | Oxidation+M(16)                          | LDAVVFTGGIGENAAMVR              | 324 | 18 | 4  | 24.85  | b4y6y11y16                                 | 1835.95 | 71.202  | 9223  | 2 | 918.48  | 10.70  |
| [P0A1S4]STPA_SALTY DNA-binding protein stpA       | 1  |                                          | ADGINPEELFAMDSAMPR              | 66  | 18 | 17 | 89.89  | b2°b2b5°b5*b5b10*b10y1y2y4y5y6y7y8y9y13y18 | 1963.91 | 89.702  | 15610 | 2 | 982.46  | 10.75  |
| [P0A1S4]STPA_SALTY DNA-binding protein stpA       | 2  |                                          | MNLMLQNLNNIR                    | 0   | 12 | 8  | 62.21  | b2b3b6b11y4y6y10y12                        | 1473.77 | 77.056  | 14982 | 2 | 737.39  | 2.07   |
| [P0A1S4]STPA_SALTY DNA-binding protein stpA       | 3  |                                          | AMAREFSIDVLEEMLEK               | 15  | 17 | 5  | 44.64  | b3b4b7b8y3                                 | 2011.00 | 72.960  | 8146  | 3 | 671.01  | 7.22   |
| [P0A1S4]STPA_SALTY DNA-binding protein stpA       | 4  | Oxidation+M(2)                           | AMAREFSIDVLEEMLEK               | 15  | 17 | 3  | 16.34  | b8b10y7                                    | 2027.01 | 105.449 | 20462 | 3 | 676.34  | 11.56  |
| [P0A1S4]STPA_SALTY DNA-binding protein stpA       | 5  | Oxidation+M(1)                           | MNLMLQNLNNIR                    | 0   | 12 | 3  | 22.3   | b3b8y3                                     | 1489.75 | 55.583  | 10792 | 2 | 745.38  | -5.08  |
| [P0A1S4]STPA_SALTY DNA-binding protein stpA       | 6  |                                          | AMAREFSI                        | 15  | 8  | 0  | 4.84   |                                            | 924.46  | 72.927  | 1616  | 1 | 924.46  | -3.17  |

|                                                            |    |                       |                                     |     |    |    |        |                                                   |         |         |        |   |         |        |
|------------------------------------------------------------|----|-----------------------|-------------------------------------|-----|----|----|--------|---------------------------------------------------|---------|---------|--------|---|---------|--------|
| [P66541]RS2_SALTY 30S ribosomal protein S2                 | 1  |                       | TVPMFNEALAE LNK                     | 45  | 14 | 11 | 60.46  | b5°b5y1y3y5*y5y9y12y13*y13y14                     | 1576.81 | 85.304  | 101314 | 2 | 788.91  | 4.41   |
| [P66541]RS2_SALTY 30S ribosomal protein S2                 | 2  |                       | EANNLGIPVFAIVDTSNDPDGVDF VIPGNDDAIR | 174 | 34 | 11 | 31.5   | b5b7°b7°b7y1y4y7y8y14y16y34                       | 3569.77 | 105.245 | 22807  | 3 | 1190.59 | 8.00   |
| [P66541]RS2_SALTY 30S ribosomal protein S2                 | 3  |                       | LKDLETQSQDGTFEK                     | 113 | 15 | 8  | 29.48  | b7°b7°b7b8°b8b10y7y15                             | 1738.85 | 39.723  | 8851   | 3 | 580.29  | -2.32  |
| [P66541]RS2_SALTY 30S ribosomal protein S2                 | 4  | Carbamidomethyl+C(6)  | EAANSCDQFFVNHR                      | 81  | 14 | 4  | 38.77  | y3y4y7y9                                          | 1694.75 | 47.938  | 7586   | 2 | 847.88  | 9.58   |
| [P66541]RS2_SALTY 30S ribosomal protein S2                 | 5  |                       | MATVSMRMDLK                         | 0   | 11 | 4  | 38.35  | b4b7y6y7                                          | 1282.63 | 49.651  | 1830   | 3 | 428.22  | 0.48   |
| [P66541]RS2_SALTY 30S ribosomal protein S2                 | 6  |                       | MKPFIFGAR                           | 26  | 9  | 3  | 30.51  | b4y4y7                                            | 1066.57 | 63.936  | 4680   | 2 | 533.79  | -19.34 |
| [P66541]RS2_SALTY 30S ribosomal protein S2                 | 7  |                       | DMGGLPDALFVIDADHEHIAIK              | 152 | 22 | 4  | 13.45  | b9°b9y8y13                                        | 2377.19 | 84.407  | 2526   | 2 | 1189.10 | 0.21   |
| [P66541]RS2_SALTY 30S ribosomal protein S2                 | 8  |                       | YWNPKMKPFIFGAR                      | 21  | 14 | 3  | 27.09  | b7b8b10                                           | 1754.92 | 63.229  | 19803  | 3 | 585.65  | 0.97   |
| [P66541]RS2_SALTY 30S ribosomal protein S2                 | 9  |                       | TVPMFNEALAE LNKISAR                 | 45  | 18 | 3  | 15.6   | b6b9y3                                            | 2004.03 | 52.559  | 2377   | 2 | 1002.52 | -14.62 |
| [P66541]RS2_SALTY 30S ribosomal protein S2                 | 10 | Oxidation+M(1)        | MATVSMRMDLK                         | 0   | 11 | 3  | 24.33  | b7y6y10                                           | 1298.61 | 68.040  | 20407  | 2 | 649.81  | -10.72 |
| [P66541]RS2_SALTY 30S ribosomal protein S2                 | 11 | Oxidation+M(4)        | TVPMFNEALAE LNK                     | 45  | 14 | 4  | 34.87  | y10y11°y11y12                                     | 1592.81 | 85.212  | 3187   | 2 | 796.91  | 5.06   |
| [P66541]RS2_SALTY 30S ribosomal protein S2                 | 12 | Carbamidomethyl+C(6)  | EAANSCDQFFVNHR                      | 81  | 14 | 0  | 3.63   |                                                   | 1676.70 | 47.921  | 3780   | 3 | 559.57  | -8.81  |
| [P58683]APHA_SALTY Class B acid phohatase                  | 1  |                       | TLADNFHIPAANMNPVIFAGDKPE QNTK       | 149 | 28 | 14 | 74.36  | b5y6°y6y7y8°y8y10*y10y11y12*y12y14y20y28          | 3053.50 | 79.981  | 53575  | 4 | 764.13  | -6.24  |
| [P58683]APHA_SALTY Class B acid phohatase                  | 2  |                       | IFYGDSNDNITAAR                      | 187 | 14 | 6  | 19.31  | b5y4°y4y8°y8*y8                                   | 1557.73 | 53.195  | 20632  | 2 | 779.37  | 9.95   |
| [P58683]APHA_SALTY Class B acid phohatase                  | 3  |                       | AANSTYKPLPQAGAFGEEVIVNSE Y          | 212 | 25 | 4  | 12.42  | b5°b5y7y9                                         | 2655.31 | 77.203  | 3297   | 3 | 885.77  | 5.70   |
| [P58683]APHA_SALTY Class B acid phohatase                  | 4  |                       | VQWLQEKNMR                          | 177 | 10 | 3  | 26.94  | b9y3y9                                            | 1331.71 | 73.631  | 2979   | 2 | 666.36  | 14.02  |
| [P58683]APHA_SALTY Class B acid phohatase                  | 5  | Oxidation+M(13)       | TLADNFHIPAANMNPVIFAGDKPE QNTK       | 149 | 28 | 3  | 11.71  | b13y6y9                                           | 3069.47 | 102.876 | 2162   | 5 | 614.70  | -13.12 |
| [P0A251]AHPC_SALTY Alkyl hydroperoxide reductase subunit C | 1  |                       | YAMIGDPTGALTR                       | 93  | 13 | 9  | 59.39  | b2b3b4y1y7y8y10y12y13                             | 1365.68 | 63.716  | 89579  | 2 | 683.35  | -0.18  |
| [P0A251]AHPC_SALTY Alkyl hydroperoxide reductase subunit C | 2  | Carbamidomethyl+C(13) | AAQYVAAHPEVCPAK                     | 153 | 16 | 17 | 117.73 | b2b3b4b5b8°b8y1y2y3y4y5y8°y8y9y11y12y16           | 1668.80 | 35.982  | 76625  | 3 | 556.94  | -11.56 |
| [P0A251]AHPC_SALTY Alkyl hydroperoxide reductase subunit C | 3  |                       | ATFVVDPQGIIQAEIVTAEGIGR             | 120 | 23 | 21 | 122.23 | b2°b2b3°b3b4°b4b5b6b8°b8y1y2y4y5°y5y6y7y8y9y17y23 | 2384.27 | 129.255 | 43169  | 3 | 795.43  | -5.22  |
| [P0A251]AHPC_SALTY Alkyl hydroperoxide reductase subunit C | 4  |                       | NFDNMREDEGLADR                      | 106 | 14 | 6  | 27.88  | b1°b1y1y3y5y9                                     | 1681.71 | 47.780  | 40982  | 3 | 561.24  | -7.62  |
| [P0A251]AHPC_SALTY Alkyl hydroperoxide reductase subunit C | 5  |                       | AWHSSSETIAK                         | 80  | 11 | 6  | 47.78  | b3b6b7°b7y4y8                                     | 1216.57 | 30.258  | 46154  | 3 | 406.20  | -17.66 |
| [P0A251]AHPC_SALTY Alkyl hydroperoxide reductase subunit C | 6  |                       | NGEFIEVTEK                          | 17  | 10 | 3  | 26.94  | b3y4y7                                            | 1165.58 | 33.325  | 5840   | 2 | 583.30  | 9.22   |
| [P0A251]AHPC_SALTY Alkyl hydroperoxide reductase subunit C | 7  |                       | LGVDVYSVSTDTHFTHK                   | 63  | 17 | 3  | 16.34  | b8y9y11                                           | 1905.93 | 56.099  | 3104   | 2 | 953.47  | -2.63  |
| [P0A251]AHPC_SALTY Alkyl hydroperoxide reductase subunit C | 8  | Carbamidomethyl+C(15) | WSVFFFPADFTFVCPTELGDVA DHYEELQK     | 32  | 31 | 6  | 25.24  | b11y5*y5y7y11y12                                  | 3757.78 | 96.572  | 2869   | 4 | 940.20  | 16.05  |
| [P0A251]AHPC_SALTY Alkyl hydroperoxide reductase subunit C | 9  |                       | NGEFIEVTEKDTEGR                     | 17  | 15 | 3  | 18.16  | b5y5y11                                           | 1723.83 | 119.788 | 4468   | 3 | 575.28  | 10.27  |
| [P0A251]AHPC_SALTY Alkyl hydroperoxide reductase subunit C | 10 | Carbamidomethyl+C(10) | YVAAHPEVCPAK                        | 156 | 13 | 3  | 25.56  | b4b5b10                                           | 1398.69 | 35.985  | 1844   | 2 | 699.85  | 1.13   |
| [P0A1G5]DKSA_SALTY DnaK suppressor protein                 | 1  |                       | TVTHMQDEAANFPDPVDR                  | 57  | 18 | 11 | 86.21  | b5b6b7b9b10y4°y4y6y7y8y18                         | 2042.91 | 56.349  | 33337  | 3 | 681.64  | -6.45  |

|                                                                         |    |                                             |                                       |     |    |    |       |                                                 |         |         |       |   |         |        |
|-------------------------------------------------------------------------|----|---------------------------------------------|---------------------------------------|-----|----|----|-------|-------------------------------------------------|---------|---------|-------|---|---------|--------|
| P0A1G5 DKSA_SALTY DnaK suppressor protein                               | 2  | Carbamidomethyl+C(10);Carbamidomethyl+C(13) | LEARPTADLCIDCK                        | 125 | 14 | 5  | 19.31 | b4°b4y2y4y12                                    | 1661.81 | 45.455  | 23630 | 3 | 554.61  | 7.79   |
| P0A1G5 DKSA_SALTY DnaK suppressor protein                               | 3  |                                             | ILEAWR                                | 42  | 6  | 1  | 13.63 | b4                                              | 787.45  | 40.228  | 6911  | 2 | 394.23  | 3.02   |
| P0A1G5 DKSA_SALTY DnaK suppressor protein                               | 4  | Carbamidomethyl+C(9);Carbamidomethyl+C(12)  | VEDEDFGYCESCGVEIGIR                   | 105 | 19 | 3  | 24.13 | y9y11y12                                        | 2233.97 | 111.744 | 4235  | 3 | 745.33  | 16.28  |
| P0A1G5 DKSA_SALTY DnaK suppressor protein                               | 5  |                                             | TLAEIR                                | 139 | 6  | 1  | 13.63 | y4                                              | 702.41  | 35.487  | 1972  | 2 | 351.71  | -2.00  |
| P0A1G5 DKSA_SALTY DnaK suppressor protein                               | 6  |                                             | TSSLSILAIGVEPYQEKPGEIYM<br>NEAQLSHFKR | 8   | 34 | 3  | 10.99 | b5b14y12                                        | 3822.87 | 99.670  | 81569 | 3 | 1274.96 | -7.28  |
| P02911 ARGT_SALTY Lysine-arginine-ornithine-binding periplasmic protein | 1  | Carbamidomethyl+C(1)                        | CTWVASDFDALIPSLK                      | 66  | 16 | 10 | 55.56 | b3°b3b5b12y2y3y4y11y14<br>y16                   | 1822.92 | 98.933  | 34417 | 2 | 911.96  | 8.10   |
| P02911 ARGT_SALTY Lysine-arginine-ornithine-binding periplasmic protein | 2  |                                             | YFGDGTGVGLR                           | 211 | 11 | 4  | 36.09 | y3y7y9y11                                       | 1141.56 | 56.597  | 26342 | 2 | 571.28  | -1.18  |
| P02911 ARGT_SALTY Lysine-arginine-ornithine-binding periplasmic protein | 3  |                                             | IGTDTTYAPFSSKDAK                      | 29  | 16 | 4  | 17.18 | b6b12y12°y12                                    | 1701.85 | 60.866  | 16099 | 3 | 567.96  | 12.05  |
| P02911 ARGT_SALTY Lysine-arginine-ornithine-binding periplasmic protein | 4  |                                             | GVDVVAYANQDLIYSDLTAGR                 | 155 | 21 | 3  | 13.89 | b8b13y6                                         | 2240.12 | 92.117  | 11280 | 3 | 747.38  | 0.00   |
| P02911 ARGT_SALTY Lysine-arginine-ornithine-binding periplasmic protein | 5  |                                             | IGTDTTYAPFSSK                         | 29  | 13 | 4  | 25.44 | b9°b9y8y9                                       | 1387.69 | 64.536  | 2999  | 2 | 694.35  | 13.28  |
| P02911 ARGT_SALTY Lysine-arginine-ornithine-binding periplasmic protein | 6  | Carbamidomethyl+C(15)                       | GEFIGFDIDLGNECK                       | 45  | 16 | 4  | 17.18 | b9y12*y12y14                                    | 1844.85 | 80.060  | 24233 | 3 | 615.62  | 15.75  |
| P02911 ARGT_SALTY Lysine-arginine-ornithine-binding periplasmic protein | 7  |                                             | QPAGK                                 | 193 | 5  | 1  | 13.23 | b3                                              | 500.28  | 46.088  | 7578  | 1 | 500.28  | -4.45  |
| P02911 ARGT_SALTY Lysine-arginine-ornithine-binding periplasmic protein | 8  |                                             | TKGVDVVAYANQDLIYSDLTAGR               | 153 | 23 | 5  | 22.09 | b13b14°b14y4°y4                                 | 2469.29 | 92.739  | 66263 | 4 | 618.08  | 12.56  |
| P02911 ARGT_SALTY Lysine-arginine-ornithine-binding periplasmic protein | 9  |                                             | HVGVLQGSTQEAYANDNWRTK                 | 134 | 21 | 4  | 34.68 | y6y7°y7y8                                       | 2374.18 | 112.572 | 2919  | 3 | 792.07  | 12.75  |
| P02911 ARGT_SALTY Lysine-arginine-ornithine-binding periplasmic protein | 10 |                                             | ALTELQDGTYDK                          | 234 | 13 | 6  | 20.67 | b8°b8y8y11°y11*y11                              | 1509.77 | 99.633  | 2473  | 4 | 378.20  | 12.69  |
| P02911 ARGT_SALTY Lysine-arginine-ornithine-binding periplasmic protein | 11 |                                             | IGTDTTYAPFSSKDAK                      | 29  | 16 | 4  | 24.3  | b4b6y7y12                                       | 1701.81 | 71.701  | 2082  | 2 | 851.41  | -10.76 |
| P02911 ARGT_SALTY Lysine-arginine-ornithine-binding periplasmic protein | 12 |                                             | QQEIAFSKLYAADSR                       | 99  | 16 | 3  | 25.56 | y6y7y10                                         | 1841.92 | 69.722  | 1608  | 3 | 614.64  | 9.08   |
| P02911 ARGT_SALTY Lysine-arginine-ornithine-binding periplasmic protein | 13 | Carbamidomethyl+C(15);Oxidation+M(14)       | GEFIGFDIDLGNECK                       | 45  | 16 | 4  | 17.18 | b3b11y9°y9                                      | 1860.82 | 27.730  | 6276  | 3 | 620.95  | 4.92   |
| P02906 SUBI_SALTY Sulfate-binding protein                               | 1  |                                             | YLYSPEGQEIAAK                         | 263 | 13 | 16 | 92.84 | b2b4b5y1y4y5y8*y8y9*y9<br>y10°y10*y10y11y13*y13 | 1468.73 | 51.388  | 59177 | 2 | 734.87  | 1.91   |
| P02906 SUBI_SALTY Sulfate-binding protein                               | 2  |                                             | LFTIDEVFGGWAK                         | 298 | 13 | 7  | 32.35 | b2b3°b3y5y7y8y13                                | 1482.77 | 102.615 | 58203 | 2 | 741.89  | 3.13   |
| P02906 SUBI_SALTY Sulfate-binding protein                               | 3  |                                             | NVEVLDSGAR                            | 183 | 10 | 6  | 40.17 | b2b9y4y5y8y10                                   | 1059.53 | 40.697  | 47550 | 2 | 530.27  | -7.95  |

|                                            |    |                   |                                |     |    |    |        |                                     |         |         |        |   |         |        |
|--------------------------------------------|----|-------------------|--------------------------------|-----|----|----|--------|-------------------------------------|---------|---------|--------|---|---------|--------|
| P02906 SUBI_SALTY Sulfate-binding protein  | 4  |                   | AVAEAYLK                       | 255 | 8  | 6  | 36.13  | b2b6y1y3y6y8                        | 864.48  | 41.532  | 24193  | 2 | 432.74  | -8.26  |
| P02906 SUBI_SALTY Sulfate-binding protein  | 5  |                   | QETGDNV VIR                    | 48  | 10 | 5  | 51.93  | y3y6y7y8y10                         | 1130.58 | 36.048  | 21063  | 2 | 565.79  | 0.86   |
| P02906 SUBI_SALTY Sulfate-binding protein  | 6  |                   | QATSVINGIEADV VTLALAYDVD AIAER | 66  | 28 | 7  | 54.39  | b11y3y5y9y10y11y12                  | 2917.51 | 128.751 | 8546   | 3 | 973.18  | -0.17  |
| P02906 SUBI_SALTY Sulfate-binding protein  | 7  |                   | LPDNSAPYTSTIVFLVR              | 104 | 17 | 3  | 23.74  | b4b6b13                             | 1892.99 | 89.572  | 5435   | 2 | 947.00  | -12.83 |
| P02906 SUBI_SALTY Sulfate-binding protein  | 8  |                   | QIHDWNDLIKPGSVITPNPK           | 126 | 21 | 5  | 24.73  | b5y4y5*y5y11                        | 2371.24 | 73.462  | 37955  | 4 | 593.56  | -17.30 |
| P02906 SUBI_SALTY Sulfate-binding protein  | 9  |                   | WNYLAAWGYALHHNNNDQAK           | 153 | 20 | 9  | 63.73  | b4b6*b6y7y8y9y11y13y14              | 2386.07 | 79.197  | 26422  | 4 | 597.27  | -18.31 |
| P02906 SUBI_SALTY Sulfate-binding protein  | 10 |                   | DIQLLNVSYPTR                   | 20  | 13 | 3  | 29.91  | y6y9y12                             | 1533.78 | 71.646  | 24945  | 3 | 511.93  | -9.95  |
| P02906 SUBI_SALTY Sulfate-binding protein  | 11 |                   | GSTNTFVER                      | 193 | 9  | 4  | 38.3   | y5y7y8*y8                           | 1010.48 | 41.161  | 5235   | 2 | 505.74  | -14.50 |
| P02906 SUBI_SALTY Sulfate-binding protein  | 12 |                   | GIGDVLIAWENEALLATNELGK         | 202 | 22 | 4  | 13.45  | b4b6y6*y6                           | 2326.18 | 114.128 | 2676   | 3 | 776.07  | -19.00 |
| P02906 SUBI_SALTY Sulfate-binding protein  | 13 |                   | AFSAHWKQETGDNV VIR             | 41  | 17 | 3  | 24.99  | b4b5b7                              | 1957.97 | 86.296  | 36387  | 3 | 653.33  | -11.10 |
| P02906 SUBI_SALTY Sulfate-binding protein  | 14 |                   | RLPDNSAPYTSTIVFLVR             | 103 | 18 | 5  | 31.03  | b4b7b9y3y5                          | 2049.10 | 83.384  | 31152  | 3 | 683.71  | -5.36  |
| P02906 SUBI_SALTY Sulfate-binding protein  | 15 |                   | NVEVLDSGARGSTNTFVER            | 183 | 19 | 3  | 22.74  | b3b4y12                             | 2051.01 | 89.691  | 6909   | 3 | 684.34  | -3.57  |
| P02906 SUBI_SALTY Sulfate-binding protein  | 16 |                   | AQKDHFGANGTFDQISK              | 311 | 17 | 6  | 27.43  | b8b9*b9b11y11*y11                   | 1863.88 | 74.111  | 3004   | 2 | 932.45  | -7.99  |
| P02906 SUBI_SALTY Sulfate-binding protein  | 17 |                   | NFYRPRDADVAK                   | 276 | 12 | 4  | 22.3   | b4b8*b8y11                          | 1451.76 | 85.243  | 2633   | 3 | 484.59  | 14.46  |
| P02906 SUBI_SALTY Sulfate-binding protein  | 18 | Phosphoryl STY(9) | FEIVTPSESILAEP TVSVVDK         | 226 | 21 | 3  | 13.89  | b7b12y13                            | 2340.15 | 86.557  | 2322   | 3 | 780.72  | -1.15  |
| P0A7V6 RS3_SALTY 30S ribosomal protein S3  | 1  |                   | LVADSITSQLER                   | 114 | 12 | 11 | 79.2   | b2y1y6y7y8y9*y9y10y11*y11y12        | 1331.71 | 61.321  | 48467  | 2 | 666.36  | -1.56  |
| P0A7V6 RS3_SALTY 30S ribosomal protein S3  | 2  |                   | ADIDYNTSEAH TTYGVIGVK          | 179 | 20 | 7  | 41     | y4y6y10y11y18*y18y20                | 2154.03 | 57.055  | 32961  | 3 | 718.68  | -4.19  |
| P0A7V6 RS3_SALTY 30S ribosomal protein S3  | 3  |                   | VVADIAGVPAQINIAEVR             | 89  | 18 | 7  | 32.6   | y1y2y4y5y10y13y18                   | 1835.03 | 77.528  | 24025  | 2 | 918.02  | -5.65  |
| P0A7V6 RS3_SALTY 30S ribosomal protein S3  | 4  |                   | VVADIAGVPAQINIAEVRKPELDA K     | 89  | 25 | 7  | 25.87  | b1b3b4y2y3*y3y17                    | 2616.44 | 71.436  | 17625  | 4 | 654.87  | -11.01 |
| P0A7V6 RS3_SALTY 30S ribosomal protein S3  | 5  |                   | IVIERPAK                       | 54  | 8  | 3  | 40.9   | y4y5y6                              | 925.57  | 31.827  | 18791  | 2 | 463.29  | -13.98 |
| P0A7V6 RS3_SALTY 30S ribosomal protein S3  | 6  |                   | GEILGGMAAVEQPEKPAAQPK          | 204 | 21 | 3  | 13.89  | b5y6y17                             | 2121.14 | 57.591  | 3823   | 2 | 1061.07 | 17.15  |
| P0A7V6 RS3_SALTY 30S ribosomal protein S3  | 7  |                   | VMFR                           | 127 | 4  | 1  | 12.83  | y3                                  | 552.30  | 31.619  | 2009   | 1 | 552.30  | 13.15  |
| P0A7V6 RS3_SALTY 30S ribosomal protein S3  | 8  |                   | RAVQNAMR                       | 135 | 8  | 4  | 40.9   | y3y4y7*y7                           | 945.51  | 55.585  | 91595  | 2 | 473.26  | 0.32   |
| P0A7V6 RS3_SALTY 30S ribosomal protein S3  | 9  |                   | LGGAEIARTEWYR                  | 156 | 13 | 3  | 29.91  | b6b9b11                             | 1521.76 | 53.925  | 2355   | 2 | 761.39  | -10.59 |
| P0A7V6 RS3_SALTY 30S ribosomal protein S3  | 10 | Phosphoryl STY(5) | LVADSITSQLER                   | 114 | 12 | 3  | 22.3   | b4y4y8                              | 1411.69 | 61.108  | 6147   | 3 | 471.24  | 14.18  |
| P0A9Y9 CC_SALTY Cold shock-like protein cC | 1  |                   | GFGFITPADGSK                   | 15  | 12 | 15 | 113.45 | b2b3y2y3*y3y4y5y6*y6y7*y7y8y9y10y12 | 1196.59 | 65.049  | 416506 | 2 | 598.80  | -2.35  |
| P0A9Y9 CC_SALTY Cold shock-like protein cC | 2  |                   | DVVFHFSAIQNGGFK                | 27  | 15 | 7  | 29.48  | b8y5y9*y9*y9y11y15                  | 1665.82 | 74.257  | 120321 | 3 | 555.94  | -11.80 |
| P0A9Y9 CC_SALTY Cold shock-like protein cC | 3  |                   | TLAEGQNVEFEIQDGQK              | 42  | 17 | 5  | 23.33  | b6y3y4*y4y17                        | 1905.91 | 83.348  | 11762  | 2 | 953.46  | -6.85  |
| P0A9Y9 CC_SALTY Cold shock-like protein cC | 4  |                   | GFGFITPADGSKDVFVHFSAIQGN GFK   | 15  | 27 | 8  | 26.01  | b10*b10b11b15y9*y9*y9y12            | 2843.42 | 100.381 | 7568   | 3 | 948.48  | 3.01   |

|                                             |    |                       |                                      |     |    |    |        |                                                                     |         |         |        |   |         |        |
|---------------------------------------------|----|-----------------------|--------------------------------------|-----|----|----|--------|---------------------------------------------------------------------|---------|---------|--------|---|---------|--------|
| P0A9Y9 CC_SALTY Cold shock-like protein cC  | 5  |                       | TLAEGQNVEFEIQDGQKGPAAVN VTAI         | 42  | 27 | 4  | 27.16  | y8y14y15y20                                                         | 2799.40 | 101.680 | 6679   | 3 | 933.80  | -6.19  |
| P0A9Y9 CC_SALTY Cold shock-like protein cC  | 6  |                       | GFGFITPADGSKDVFVHFSAIQGN GFK         | 15  | 27 | 4  | 11.92  | b11y3y5*y5                                                          | 2843.41 | 88.007  | 3513   | 3 | 948.48  | -0.09  |
| P0A9Y9 CC_SALTY Cold shock-like protein cC  | 7  |                       | FVHFSAIQNGNGFK                       | 29  | 13 | 0  | 4.03   |                                                                     | 1451.73 | 74.243  | 5456   | 2 | 726.37  | -6.81  |
| P0A9Y9 CC_SALTY Cold shock-like protein cC  | 8  |                       | SKDVFVHFSAIQNGNGFK                   | 25  | 17 | 2  | 12.11  | b10b13                                                              | 1880.94 | 100.345 | 2451   | 2 | 940.97  | -14.93 |
| O68883 CISY_SALTY Citrate synthase          | 1  | Carbamidomethyl+C(12) | TAGSSGANPFACIAAGIASLWGPA HGGANEAAALK | 240 | 34 | 20 | 91.57  | b2°b2b3°b3b4b14y1y2y3y9y13y14y16y17y25y26y27y29y34*y34              | 3195.58 | 117.015 | 53510  | 3 | 1065.87 | 5.81   |
| O68883 CISY_SALTY Citrate synthase          | 2  | Carbamidomethyl+C(9)  | DSHPMAVMCGITGALAAFYHDSL DVNNPR       | 127 | 29 | 10 | 29.02  | b7b10y1y2y6y9*y9y10*y10y15                                          | 3159.43 | 109.375 | 22345  | 4 | 790.61  | -5.49  |
| O68883 CISY_SALTY Citrate synthase          | 3  | Carbamidomethyl+C(15) | GVFTFDPGFTSTASCESK                   | 38  | 18 | 5  | 48.17  | y11y12y13y14y18                                                     | 1937.88 | 76.599  | 21445  | 2 | 969.44  | 11.02  |
| O68883 CISY_SALTY Citrate synthase          | 4  | Carbamidomethyl+C(18) | NDLSYAGNFLNMMFSTPCETYEV NPVLER       | 189 | 29 | 6  | 26.02  | b2b4y5y9y13y14                                                      | 3411.57 | 112.178 | 17458  | 3 | 1137.86 | 10.38  |
| O68883 CISY_SALTY Citrate synthase          | 5  |                       | GTLGQDVIDIR                          | 22  | 11 | 4  | 24.33  | b3b6y2y9                                                            | 1186.64 | 69.235  | 11174  | 2 | 593.83  | 1.34   |
| O68883 CISY_SALTY Citrate synthase          | 6  |                       | QLYTGyDK                             | 410 | 8  | 7  | 64.36  | b5b6y2°y2y5y6y7                                                     | 987.49  | 32.556  | 2645   | 2 | 494.25  | 10.14  |
| O68883 CISY_SALTY Citrate synthase          | 7  |                       | YSIGQPFVYPR                          | 178 | 11 | 5  | 31.32  | b5°b5b6°b6b10                                                       | 1326.71 | 72.365  | 105660 | 2 | 663.86  | 16.10  |
| O68883 CISY_SALTY Citrate synthase          | 8  |                       | ILILHADHEQNASTSTVR                   | 222 | 18 | 3  | 15.6   | b9y4y11                                                             | 2005.03 | 44.759  | 19707  | 3 | 669.01  | -10.17 |
| O68883 CISY_SALTY Citrate synthase          | 9  |                       | LLSK                                 | 164 | 4  | 1  | 12.83  | y3                                                                  | 460.31  | 53.632  | 7911   | 1 | 460.31  | -7.29  |
| O68883 CISY_SALTY Citrate synthase          | 10 |                       | LFHAFR                               | 120 | 6  | 1  | 13.63  | y5                                                                  | 790.44  | 32.832  | 5370   | 2 | 395.72  | -0.85  |
| O68883 CISY_SALTY Citrate synthase          | 11 |                       | AMGIPSSMFTVIFAMAR                    | 371 | 17 | 4  | 27.43  | b4b5b8y12                                                           | 1829.93 | 74.746  | 1640   | 3 | 610.65  | 8.21   |
| O68883 CISY_SALTY Citrate synthase          | 12 |                       | TTVTRHTMIHEQITR                      | 105 | 15 | 3  | 26.24  | b11b12b14                                                           | 1823.96 | 100.278 | 293243 | 2 | 912.48  | 2.01   |
| O68883 CISY_SALTY Citrate synthase          | 13 |                       | NYDPRATVMR                           | 310 | 10 | 3  | 33.93  | b3b4b9                                                              | 1222.61 | 76.217  | 4874   | 2 | 611.81  | 11.38  |
| O68883 CISY_SALTY Citrate synthase          | 14 |                       | MLEISSVKHIPEFVR                      | 274 | 16 | 3  | 17.18  | b8b10y13                                                            | 1914.00 | 80.024  | 2412   | 2 | 957.50  | -9.12  |
| O68883 CISY_SALTY Citrate synthase          | 15 | Phosphoryl STY(9)     | LYPNVDFYSGIILK                       | 357 | 14 | 3  | 24.75  | b7y6y7                                                              | 1721.86 | 64.624  | 20602  | 3 | 574.63  | 10.42  |
| O68883 CISY_SALTY Citrate synthase          | 16 | Oxidation+M(15)       | AMGIPSSMFTVIFAMAR                    | 371 | 17 | 3  | 16.34  | b4y6y9                                                              | 1845.91 | 100.272 | 63748  | 3 | 615.97  | 0.99   |
| O68883 CISY_SALTY Citrate synthase          | 17 |                       | LGQDVIDIR                            | 24  | 9  | 0  | 2.42   |                                                                     | 1028.57 | 69.259  | 38362  | 2 | 514.79  | -6.05  |
| P66170 RL29_SALTY 50S ribosomal protein L29 | 1  |                       | MQAASGQLQQSHLLK                      | 29  | 15 | 26 | 159.81 | b1b2°b2b3°b3b4°b4b8b9y1y2y4y6°y6y7°y7*y7y9*y9y10y11y12y13*y13y14y15 | 1639.84 | 45.496  | 230056 | 3 | 547.28  | -13.99 |
| P66170 RL29_SALTY 50S ribosomal protein L29 | 2  |                       | SVEELNTELLNLLR                       | 9   | 14 | 10 | 88.47  | b2y1y3y4y5y6y8y9y10y14                                              | 1642.91 | 101.538 | 117172 | 2 | 821.96  | 3.79   |
| P66170 RL29_SALTY 50S ribosomal protein L29 | 3  |                       | EQFNLR                               | 23  | 6  | 3  | 26.87  | b3y4*y4                                                             | 806.41  | 42.577  | 71735  | 2 | 403.71  | -12.34 |
| P66170 RL29_SALTY 50S ribosomal protein L29 | 4  |                       | AASGQLQQSHLLK                        | 31  | 13 | 12 | 85.86  | b3°b3b4°b4b5°b5°b5b7b10°b10b11b12                                   | 1380.75 | 45.507  | 3105   | 2 | 690.88  | -6.72  |
| P02936 OMPA_SALTY Outer membrane protein A  | 1  | Carbamidomethyl+C(13) | GMGESNPVTGNTCDNVKPR                  | 302 | 19 | 16 | 149.3  | b3b4y2y3y5y7y9y10y11°y11*y11y13y14y15y17y19                         | 2032.90 | 38.318  | 94893  | 3 | 678.31  | -6.49  |
| P02936 OMPA_SALTY Outer membrane protein A  | 2  |                       | SDVLFNFNFK                           | 222 | 9  | 6  | 45.51  | b2b3y4y5y6y9                                                        | 1083.53 | 69.452  | 55924  | 2 | 542.27  | -11.94 |



|                                              |    |                      |                                      |     |    |    |        |                                              |         |         |        |   |         |        |
|----------------------------------------------|----|----------------------|--------------------------------------|-----|----|----|--------|----------------------------------------------|---------|---------|--------|---|---------|--------|
| P02936 OMPA_SALTY Outer membrane protein A   | 3  |                      | STLKPEGQQALDQLYSQLSNLDPK             | 231 | 24 | 6  | 16.89  | b2b8b22y2y6y9                                | 2673.38 | 90.265  | 53390  | 3 | 891.80  | 0.82   |
| P02936 OMPA_SALTY Outer membrane protein A   | 4  |                      | IGSDAYNQGLSEKR                       | 267 | 14 | 7  | 66.48  | b3y4y5y6y7y8y14                              | 1537.74 | 35.072  | 26449  | 3 | 513.25  | -11.27 |
| P02936 OMPA_SALTY Outer membrane protein A   | 5  | Carbamidomethyl+C(6) | AALIDCLAPDR                          | 321 | 11 | 6  | 27.34  | b8°b8y3y4°y4y11                              | 1214.62 | 62.670  | 23499  | 2 | 607.81  | -0.60  |
| P02936 OMPA_SALTY Outer membrane protein A   | 6  |                      | LGYPITDDLDVYTR                       | 103 | 14 | 4  | 19.31  | b2b11y4y9                                    | 1640.82 | 76.915  | 12368  | 2 | 820.91  | 2.01   |
| P02936 OMPA_SALTY Outer membrane protein A   | 7  |                      | DGSVVVLGFTDR                         | 255 | 12 | 3  | 26.28  | b3b4y5                                       | 1264.64 | 70.970  | 2697   | 2 | 632.82  | -14.00 |
| P02936 OMPA_SALTY Outer membrane protein A   | 8  |                      | IGSDAYNQGLSEK                        | 267 | 13 | 3  | 20.67  | b4b11y8                                      | 1381.67 | 38.825  | 12548  | 2 | 691.34  | 4.15   |
| P02936 OMPA_SALTY Outer membrane protein A   | 9  |                      | FGQQEAAPVVAPAPAPAPEVQTK              | 194 | 23 | 9  | 52.61  | b4b9b11°b11y6y8y10y12y14                     | 2303.24 | 54.691  | 9669   | 2 | 1152.12 | 16.01  |
| P02936 OMPA_SALTY Outer membrane protein A   | 10 |                      | AQGVQLTAKLGYPTDDLDVYTR               | 94  | 23 | 3  | 22.09  | b3b4y8                                       | 2537.31 | 125.901 | 6110   | 3 | 846.44  | -7.60  |
| P02936 OMPA_SALTY Outer membrane protein A   | 11 |                      | GDNINGAYKAQGVQLTAK                   | 85  | 18 | 3  | 22.76  | b4b11b14                                     | 1847.94 | 102.911 | 5323   | 2 | 924.47  | -12.75 |
| P02936 OMPA_SALTY Outer membrane protein A   | 12 |                      | DGSVVVLGFTDRIGSDAYNQGLSEK            | 255 | 25 | 5  | 21.96  | b5°b5b6y7*y7                                 | 2627.29 | 67.010  | 4820   | 4 | 657.58  | -1.95  |
| P02936 OMPA_SALTY Outer membrane protein A   | 13 | Phosphoryl STY(7)    | GVKDVVVTQPQA                         | 339 | 11 | 3  | 31.32  | b4b5b8                                       | 1221.59 | 31.620  | 112034 | 2 | 611.30  | 11.49  |
| Q7CPE1 ATPA_SALTY ATP synthase subunit alpha | 1  |                      | IGSFEAALLAYVDRDHAPLMQEINQSGGYNDEIEGK | 463 | 36 | 13 | 35.31  | b2b6b20b23b25y2y3°y3y7°y7y8y11y36            | 3950.89 | 96.001  | 97965  | 4 | 988.48  | 0.87   |
| Q7CPE1 ATPA_SALTY ATP synthase subunit alpha | 2  | Carbamidomethyl+C(7) | IHGLADCMQGEMISLPGNR                  | 40  | 19 | 11 | 56.64  | b2b3b12b13y4*y4y5y6*y6y8y19                  | 2098.97 | 69.692  | 50617  | 3 | 700.33  | -5.47  |
| Q7CPE1 ATPA_SALTY ATP synthase subunit alpha | 3  |                      | IAQFNVSSEAHNEGATIVSVSDGVI R          | 15  | 25 | 4  | 12.42  | b10y8y22y25                                  | 2641.32 | 75.126  | 48718  | 3 | 881.11  | -14.88 |
| Q7CPE1 ATPA_SALTY ATP synthase subunit alpha | 4  |                      | ILEVPVGR                             | 93  | 8  | 5  | 40.9   | b2y4y5y6y8                                   | 882.53  | 53.085  | 48643  | 2 | 441.77  | -10.65 |
| Q7CPE1 ATPA_SALTY ATP synthase subunit alpha | 5  |                      | MQLNSTEISELIK                        | 0   | 13 | 10 | 45.58  | b2b3y2y3y8y10y11*y11y13*y13                  | 1505.79 | 77.601  | 48597  | 2 | 753.40  | 0.49   |
| Q7CPE1 ATPA_SALTY ATP synthase subunit alpha | 6  |                      | AVDSMIPIGR                           | 151 | 10 | 8  | 58.17  | b2b4°b4y4y6y7y8y10                           | 1058.56 | 60.509  | 39595  | 2 | 529.78  | -5.42  |
| Q7CPE1 ATPA_SALTY ATP synthase subunit alpha | 7  |                      | QSVDQPQVTGYK                         | 139 | 12 | 18 | 122.12 | b3*b3b4°b4°b4b7°b7y1y4y5*y5y6y7y8*y8y9y10y12 | 1349.67 | 34.847  | 30524  | 2 | 675.34  | 0.27   |
| Q7CPE1 ATPA_SALTY ATP synthase subunit alpha | 8  |                      | GYLADVELAK                           | 453 | 10 | 7  | 55.62  | b2b3b5y6y7y8y10                              | 1078.57 | 61.099  | 29306  | 2 | 539.79  | -3.73  |
| Q7CPE1 ATPA_SALTY ATP synthase subunit alpha | 9  |                      | QYAPMSVAQQLVFLAAER                   | 434 | 19 | 6  | 22.74  | b3b19y5°y5y6y19                              | 2109.10 | 94.014  | 27974  | 2 | 1055.06 | 11.81  |
| Q7CPE1 ATPA_SALTY ATP synthase subunit alpha | 10 |                      | ELAAFSQFASDLDDATRK                   | 401 | 18 | 4  | 24.52  | b2y9y10y13                                   | 1984.94 | 84.059  | 18780  | 3 | 662.32  | -8.92  |
| Q7CPE1 ATPA_SALTY ATP synthase subunit alpha | 11 |                      | DSVGAVVMGPYADLAEGMK                  | 68  | 19 | 9  | 39.46  | b2b4b12b13y1y7°y7y8y19                       | 1909.90 | 80.268  | 16229  | 2 | 955.45  | -4.35  |
| Q7CPE1 ATPA_SALTY ATP synthase subunit alpha | 12 |                      | QLNSTEISELIK                         | 1   | 12 | 5  | 29.51  | b7b9b10°b10y12                               | 1374.74 | 81.984  | 15586  | 2 | 687.87  | -6.30  |
| Q7CPE1 ATPA_SALTY ATP synthase subunit alpha | 13 |                      | GILDSFK                              | 501 | 7  | 6  | 56.74  | b4b6°b6y4y5y7                                | 779.42  | 66.232  | 6517   | 2 | 390.21  | -9.79  |
| Q7CPE1 ATPA_SALTY ATP synthase subunit alpha | 14 |                      | TALAIDAIIINQRDSGIK                   | 175 | 17 | 7  | 33.75  | b1b4°b4b5°b5b7b13                            | 1799.00 | 104.741 | 5370   | 2 | 900.00  | -1.90  |
| Q7CPE1 ATPA_SALTY ATP synthase subunit alpha | 15 |                      | TALAIDAIIINQR                        | 175 | 12 | 5  | 29.51  | y3*y3y4*y4y8                                 | 1298.74 | 74.797  | 25400  | 2 | 649.88  | 0.00   |
| Q7CPE1 ATPA_SALTY ATP synthase subunit alpha | 16 |                      | ELAAFSQFASDLDDATR                    | 401 | 17 | 8  | 92.91  | y3y4y5y6y10y11y13y15                         | 1856.88 | 89.325  | 23841  | 2 | 928.94  | 7.03   |
| Q7CPE1 ATPA_SALTY ATP synthase subunit alpha | 17 |                      | VGGAAQTK                             | 376 | 8  | 3  | 40.9   | b3b4b6                                       | 731.40  | 33.486  | 16457  | 1 | 731.40  | -4.67  |
| Q7CPE1 ATPA_SALTY ATP synthase subunit alpha | 18 |                      | GPVDNDGFSAVEAIPGVIDR                 | 118 | 21 | 3  | 22.34  | b10y6y7                                      | 2099.06 | 82.819  | 5499   | 2 | 1050.04 | 11.40  |

|                                                           |    |                                           |                                              |     |    |    |       |                                             |         |         |        |   |         |        |
|-----------------------------------------------------------|----|-------------------------------------------|----------------------------------------------|-----|----|----|-------|---------------------------------------------|---------|---------|--------|---|---------|--------|
| Q7CPE1 ATPA_SALTY ATP synthase subunit alpha              | 19 |                                           | TALAQYR                                      | 394 | 7  | 4  | 37.49 | b5*b5y3y4                                   | 822.43  | 28.386  | 2227   | 2 | 411.72  | -18.55 |
| Q7CPE1 ATPA_SALTY ATP synthase subunit alpha              | 20 |                                           | VVNTLGAPIDGKGVPVDNDGFSAV<br>EAIAPGVIDR       | 106 | 33 | 15 | 105.5 | b7*b7b25y4y6*y6y7y8y9y1<br>0y11y16y17y24y26 | 3263.70 | 85.061  | 59396  | 3 | 1088.57 | 3.67   |
| Q7CPE1 ATPA_SALTY ATP synthase subunit alpha              | 21 |                                           | DHAPLMQEINQSGGYNDEIEGKL<br>K                 | 477 | 24 | 3  | 19.03 | b4b11b13                                    | 2686.31 | 93.832  | 26383  | 3 | 896.11  | 12.81  |
| Q7CPE1 ATPA_SALTY ATP synthase subunit alpha              | 22 |                                           | DRGEDALIYDDLK                                | 250 | 15 | 3  | 24.18 | b8y5y6                                      | 1722.87 | 74.588  | 21302  | 2 | 861.94  | 6.87   |
| Q7CPE1 ATPA_SALTY ATP synthase subunit alpha              | 23 |                                           | IGSFEAALLAYVDRDHAPLMQEIN<br>QSGGYNDEIEGK     | 463 | 36 | 5  | 12.66 | b5b13y7y9*y9                                | 3950.85 | 85.154  | 20490  | 3 | 1317.62 | -8.90  |
| Q7CPE1 ATPA_SALTY ATP synthase subunit alpha              | 24 |                                           | VNADYVEAFTKGEVK                              | 303 | 15 | 3  | 18.16 | b8b11y9                                     | 1669.86 | 103.452 | 5602   | 2 | 835.43  | 7.46   |
| Q7CPE1 ATPA_SALTY ATP synthase subunit alpha              | 25 | Carbamidomethyl+C(32)<br>;Oxidation+M(34) | LEEHGALANTIVVVATASESAALQ<br>YLAPYAGCAMEGEYFR | 211 | 39 | 4  | 23.44 | b3*b3b4b7                                   | 4159.96 | 81.505  | 4430   | 4 | 1040.75 | -11.15 |
| Q8ZLD7 UA_SALTY Universal stress protein A                | 1  |                                           | ISEETHHALTELSTNAGYPITETLS<br>GSGDLGQVLVDAIK  | 61  | 39 | 9  | 38.25 | b8b12*b12y3y4y12y14y15<br>y39               | 4067.06 | 98.886  | 140020 | 4 | 1017.52 | 2.52   |
| Q8ZLD7 UA_SALTY Universal stress protein A                | 2  |                                           | QLINTVHVDMILIVPLRDEEE                        | 124 | 20 | 11 | 49.6  | b2*b2b10b11*b11y1y7y8y<br>9y20*y20          | 2363.22 | 87.273  | 82889  | 3 | 788.41  | -3.41  |
| Q8ZLD7 UA_SALTY Universal stress protein A                | 3  |                                           | AVSMARPYNAK                                  | 22  | 11 | 8  | 55.56 | b9b10y1y5y7*y7y9y11                         | 1207.62 | 31.803  | 76075  | 2 | 604.31  | -2.53  |
| Q8ZLD7 UA_SALTY Universal stress protein A                | 4  |                                           | ISEETHHALTELSTNAGYPITETLS<br>GSGDLGQVLVDAIKK | 61  | 40 | 12 | 57.95 | b11*b11b12b15b16b17y2y<br>4y7y22y24y40      | 4195.15 | 94.994  | 48343  | 4 | 1049.54 | 2.79   |
| Q8ZLD7 UA_SALTY Universal stress protein A                | 5  | Carbamidomethyl+C(9)                      | KYDMDLVVCGHHQDFWSK                           | 100 | 18 | 3  | 15.6  | b7b10y9                                     | 2264.99 | 65.372  | 3889   | 4 | 567.00  | -12.18 |
| Q8ZLD7 UA_SALTY Universal stress protein A                | 6  |                                           | MAYKHILIAVDLSPESK                            | 0   | 17 | 4  | 22.96 | b3b5y5y8                                    | 1915.01 | 83.861  | 1748   | 3 | 639.01  | -11.79 |
| Q8ZLD7 UA_SALTY Universal stress protein A                | 7  |                                           | SMARPYNAK                                    | 24  | 9  | 3  | 31.32 | b4b6b7                                      | 1037.51 | 31.799  | 80619  | 2 | 519.26  | -5.06  |
| Q8ZLD7 UA_SALTY Universal stress protein A                | 8  |                                           | VSMARPYNAK                                   | 23  | 10 | 0  | 2.42  |                                             | 1136.58 | 31.841  | 9277   | 2 | 568.79  | -6.98  |
| Q8ZLD7 UA_SALTY Universal stress protein A                | 9  |                                           | AVSMARPYNAK                                  | 22  | 11 | 0  | 2.42  |                                             | 1189.60 | 31.801  | 4910   | 3 | 397.21  | -4.93  |
| Q8ZJV7 DEOD_SALTY Purine nucleoside phohorylase deoD-type | 1  | Carbamidomethyl+C(13)                     | ISVMGHGMGIPSCSIYTK                           | 57  | 18 | 5  | 26.61 | b5b6*b6b12y5                                | 1937.93 | 98.900  | 4635   | 2 | 969.47  | 1.95   |
| Q8ZJV7 DEOD_SALTY Purine nucleoside phohorylase deoD-type | 2  | Carbamidomethyl+C(13)                     | ISVMGHGMGIPSCSIYTKELITDFG<br>VK              | 57  | 27 | 9  | 75.76 | b2b6b7b8*b8b9b10b11y3                       | 2940.50 | 112.499 | 3281   | 3 | 980.84  | 10.05  |
| Q8ZJV7 DEOD_SALTY Purine nucleoside phohorylase deoD-type | 3  | Carbamidomethyl+C(5)                      | ALTICTVSDHIR                                 | 196 | 12 | 3  | 26.28 | b8b9y10                                     | 1385.71 | 47.293  | 1903   | 3 | 462.57  | -8.46  |
| Q8ZJV7 DEOD_SALTY Purine nucleoside phohorylase deoD-type | 4  |                                           | YGVLGVEMEAAGIYGVAAEFGAK                      | 173 | 23 | 5  | 33.63 | b8b12b14y9y10                               | 2302.10 | 81.925  | 9261   | 3 | 768.04  | -16.65 |
| Q8ZJV7 DEOD_SALTY Purine nucleoside phohorylase deoD-type | 5  |                                           | EVNNVR                                       | 38  | 6  | 1  | 13.63 | b3                                          | 730.38  | 31.597  | 6967   | 1 | 730.38  | -0.33  |
| Q8ZJV7 DEOD_SALTY Purine nucleoside phohorylase deoD-type | 6  |                                           | QTTFNMIK                                     | 218 | 9  | 3  | 30.51 | b4y5y6                                      | 1097.53 | 51.700  | 1510   | 3 | 366.51  | 0.56   |
| Q8ZJV7 DEOD_SALTY Purine nucleoside phohorylase deoD-type | 7  | Carbamidomethyl+C(14)                     | KISVMGHGMGIPSCSIYTK                          | 56  | 19 | 3  | 14.96 | b10y10y12                                   | 2066.00 | 85.560  | 4447   | 2 | 1033.50 | -10.64 |
| Q8ZJV7 DEOD_SALTY Purine nucleoside phohorylase deoD-type | 8  |                                           | THEQTTAERQTTFNMIK                            | 208 | 19 | 5  | 25.9  | b13y5y6y11*y11                              | 2222.03 | 93.781  | 2891   | 2 | 1111.52 | -10.77 |
| Q8ZJV7 DEOD_SALTY Purine nucleoside phohorylase deoD-type | 9  |                                           | EVNNVRGMLGFTGTYK                             | 38  | 16 | 3  | 17.18 | b8y3y7                                      | 1785.91 | 50.335  | 2588   | 2 | 893.46  | 6.08   |
| Q8ZJV7 DEOD_SALTY Purine nucleoside phohorylase deoD-type | 10 | Carbamidomethyl+C(5)                      | ALTICTVSDHIRTHEQTTAER                        | 196 | 22 | 3  | 13.45 | b9y8y10                                     | 2510.23 | 88.702  | 2021   | 3 | 837.41  | -4.96  |
| Q8ZJV7 DEOD_SALTY Purine nucleoside phohorylase deoD-type | 11 | Carbamidomethyl+C(11)<br>;Oxidation+M(8)  | LRDVVIMGACTDSK                               | 100 | 15 | 3  | 26.24 | y3y4y12                                     | 1637.80 | 69.373  | 4972   | 2 | 819.40  | -0.75  |

|                                                                  |    |                                       |                                       |     |    |    |       |                            |         |         |       |   |         |        |
|------------------------------------------------------------------|----|---------------------------------------|---------------------------------------|-----|----|----|-------|----------------------------|---------|---------|-------|---|---------|--------|
| P66869 SUCC_SALTY Succinyl-CoA ligase [ADP-forming] subunit beta | 1  |                                       | SLTDAAQQVVAAVEGK                      | 372 | 16 | 10 | 46.68 | b6°b6b13b14y2y3°y3y5y6y16  | 1586.83 | 89.172  | 45735 | 2 | 793.92  | -2.38  |
| P66869 SUCC_SALTY Succinyl-CoA ligase [ADP-forming] subunit beta | 2  |                                       | VALDPLTGPMPLYQGR                      | 146 | 15 | 6  | 26.24 | b2y2y5y7y9y15              | 1614.84 | 71.706  | 30314 | 2 | 807.92  | 4.31   |
| P66869 SUCC_SALTY Succinyl-CoA ligase [ADP-forming] subunit beta | 3  |                                       | LHGGEPANFLDVGGGATK                    | 277 | 18 | 7  | 21.78 | b2b5b9°b9y6y16y18          | 1739.86 | 59.846  | 29276 | 3 | 580.62  | -9.05  |
| P66869 SUCC_SALTY Succinyl-CoA ligase [ADP-forming] subunit beta | 4  |                                       | DLALIEINPLVITK                        | 191 | 14 | 11 | 86.26 | b2b3b4b5y2y3y4y6y7y9y14    | 1551.94 | 98.308  | 21564 | 2 | 776.47  | 2.75   |
| P66869 SUCC_SALTY Succinyl-CoA ligase [ADP-forming] subunit beta | 5  |                                       | LVTYQTDANGQPVNQILVEAATDIGNKELYLGAVVDR | 80  | 36 | 11 | 42.44 | b2b8°b8y1y4y6y7y8y23y25y36 | 3874.06 | 122.151 | 17147 | 3 | 1292.02 | 9.14   |
| P66869 SUCC_SALTY Succinyl-CoA ligase [ADP-forming] subunit beta | 6  |                                       | LEGNNaelGAK                           | 348 | 11 | 4  | 31.32 | y6y9y10y11                 | 1115.56 | 29.914  | 15580 | 2 | 558.29  | -5.03  |
| P66869 SUCC_SALTY Succinyl-CoA ligase [ADP-forming] subunit beta | 7  |                                       | LHGGEPANFLDVGGGATKER                  | 277 | 20 | 4  | 23.81 | b4b8b9b20                  | 2025.00 | 81.325  | 9716  | 3 | 675.67  | -6.93  |
| P66869 SUCC_SALTY Succinyl-CoA ligase [ADP-forming] subunit beta | 8  | Carbamidomethyl+C(11)                 | YGLPAPVGyACTTPR                       | 14  | 15 | 3  | 18.16 | b3b7y9                     | 1622.79 | 46.847  | 2905  | 3 | 541.60  | -8.80  |
| P66869 SUCC_SALTY Succinyl-CoA ligase [ADP-forming] subunit beta | 9  |                                       | IFMGLATIFLER                          | 179 | 12 | 3  | 22.3  | b11y7y10                   | 1410.78 | 109.444 | 15411 | 2 | 705.89  | -1.30  |
| P66869 SUCC_SALTY Succinyl-CoA ligase [ADP-forming] subunit beta | 10 |                                       | IILSDDNVK                             | 303 | 9  | 4  | 45    | b6b7y5y8                   | 1016.54 | 36.050  | 2894  | 2 | 508.78  | -18.37 |
| P66869 SUCC_SALTY Succinyl-CoA ligase [ADP-forming] subunit beta | 11 |                                       | RVVFMasteGGVEIEK                      | 119 | 16 | 3  | 25.56 | y5y12y13                   | 1751.89 | 79.846  | 11837 | 2 | 876.45  | -4.11  |
| P66869 SUCC_SALTY Succinyl-CoA ligase [ADP-forming] subunit beta | 12 |                                       | LADsGLNIIAAKSLTDAAQQVVAAVEGK          | 360 | 28 | 6  | 36.02 | b3b6°b6b7b8y7              | 2753.48 | 73.496  | 4080  | 3 | 918.50  | -10.55 |
| P66869 SUCC_SALTY Succinyl-CoA ligase [ADP-forming] subunit beta | 13 |                                       | MNLHEYQAKQLFAR                        | 0   | 14 | 3  | 24.75 | b9b10y11                   | 1748.90 | 79.969  | 3856  | 2 | 874.95  | 4.33   |
| P66869 SUCC_SALTY Succinyl-CoA ligase [ADP-forming] subunit beta | 14 |                                       | EAEeAASKIGAGPWVVK                     | 29  | 17 | 5  | 33.75 | b3b8b11°b11b12             | 1741.90 | 82.443  | 3426  | 2 | 871.45  | -8.69  |
| P66869 SUCC_SALTY Succinyl-CoA ligase [ADP-forming] subunit beta | 15 | Carbamidomethyl+C(20);Oxidation+M(32) | EAQAaQWELNYValDGNIGCMVNGAGLAMGTMDIVK  | 241 | 36 | 4  | 10.9  | b4b14y7°y7                 | 3826.84 | 84.178  | 1821  | 3 | 1276.29 | 13.78  |
| P66869 SUCC_SALTY Succinyl-CoA ligase [ADP-forming] subunit beta | 16 | Oxidation+M(4)                        | VVFMasteGGVEIEK                       | 120 | 15 | 6  | 51.62 | b8b14y6y9y10y11            | 1611.77 | 136.559 | 1539  | 1 | 1611.77 | -14.77 |
| Q8ZRP4 DAPD_SALTY 2                                              | 1  |                                       | MQQLQNVIETAFER                        | 0   | 14 | 10 | 81.2  | b8°b8b10y3y6y7y9y10y11y14  | 1706.87 | 86.761  | 55819 | 2 | 853.94  | 8.80   |
| Q8ZRP4 DAPD_SALTY 2                                              | 2  |                                       | IDGQWVTHQWLK                          | 48  | 12 | 7  | 47.97 | b2b3b4b6b7y1y12            | 1510.77 | 91.212  | 51420 | 2 | 755.89  | -9.78  |
| Q8ZRP4 DAPD_SALTY 2                                              | 3  |                                       | INDNQVIDGAESR                         | 68  | 13 | 10 | 62.79 | b2b3y1y5y6y7°y7y8y10y13    | 1430.69 | 41.960  | 21386 | 2 | 715.85  | 2.05   |
| Q8ZRP4 DAPD_SALTY 2                                              | 4  |                                       | SEVVEGVIVEEGSVISMGVYLGS TK            | 187 | 26 | 3  | 21.93 | b11y10y11                  | 2696.39 | 101.758 | 3004  | 3 | 899.47  | 7.52   |
| Q8ZRP4 DAPD_SALTY 2                                              | 5  |                                       | FADYDEAR                              | 89  | 8  | 4  | 33.12 | b3b4°b4y7                  | 986.42  | 35.259  | 10738 | 2 | 493.72  | 3.59   |
| Q8ZRP4 DAPD_SALTY 2                                              | 6  |                                       | EAVNQVISLLDSGALR                      | 28  | 16 | 7  | 65.85 | b14y4y5y6y9y10y13          | 1684.90 | 92.799  | 5131  | 3 | 562.30  | -15.50 |
| Q8ZRP4 DAPD_SALTY 2                                              | 7  | Carbamidomethyl+C(28)                 | NVHLsGGVGIGGVLEPLQANPTIIE DNCFIGAR    | 154 | 33 | 4  | 11.06 | b15°b15y8y14               | 3417.73 | 96.776  | 3567  | 5 | 684.35  | -8.71  |

|                                                                                        |    |                       |                                 |     |    |    |        |                              |         |         |       |   |         |        |
|----------------------------------------------------------------------------------------|----|-----------------------|---------------------------------|-----|----|----|--------|------------------------------|---------|---------|-------|---|---------|--------|
| Q8ZRP4 DAPD_SALTY 2                                                                    | 8  |                       | ETGEVHYGR                       | 217 | 9  | 5  | 30.51  | b5°b5b8y6°y6                 | 1047.48 | 32.627  | 1521  | 2 | 524.24  | -7.34  |
| Q8ZRP4 DAPD_SALTY 2                                                                    | 9  |                       | YFDKVPMK                        | 81  | 8  | 3  | 36.13  | b6y5y7                       | 1027.52 | 55.570  | 4836  | 2 | 514.27  | -3.56  |
| Q8ZRP4 DAPD_SALTY 2                                                                    | 10 |                       | IYDRETGEVHYGR                   | 213 | 13 | 4  | 32.35  | b7y6y7y9                     | 1594.77 | 60.910  | 1756  | 2 | 797.89  | 6.43   |
| Q8ZRP4 DAPD_SALTY 2                                                                    | 11 |                       | VPMKFADYDEAR                    | 85  | 12 | 4  | 34.29  | b3b4b7y5                     | 1441.67 | 66.207  | 1654  | 2 | 721.34  | -3.39  |
| Q8ZRP4 DAPD_SALTY 2                                                                    | 12 | Phosphoryl STY(5)     | VPAGSVVVSGNLP SK                | 226 | 15 | 3  | 18.16  | b4b7y12                      | 1490.77 | 81.006  | 2891  | 2 | 745.89  | 14.49  |
| Q9L6N1 METE_SALTY 5-methyltetrahydropteroylriglutamate--homocysteine methyltransferase | 1  | Carbamidomethyl+C(7)  | LWVNPDCLK                       | 719 | 10 | 7  | 68.17  | b2y4y5y6y7y8y10              | 1201.60 | 61.270  | 50143 | 2 | 601.30  | -1.52  |
| Q9L6N1 METE_SALTY 5-methyltetrahydropteroylriglutamate--homocysteine methyltransferase | 2  |                       | AQESYWAGNTTR                    | 21  | 12 | 5  | 32.23  | b6b9y4y7y12                  | 1383.63 | 30.214  | 28800 | 2 | 692.32  | 3.53   |
| Q9L6N1 METE_SALTY 5-methyltetrahydropteroylriglutamate--homocysteine methyltransferase | 3  |                       | LAAITAQDSQRENPYEVR              | 395 | 18 | 8  | 36.61  | b2b3y2y14*y14y15y16y18       | 2061.03 | 48.078  | 26974 | 3 | 687.68  | -4.62  |
| Q9L6N1 METE_SALTY 5-methyltetrahydropteroylriglutamate--homocysteine methyltransferase | 4  |                       | LTWTQLLEEVDEALALGHK             | 137 | 19 | 9  | 44.33  | b2b5y1y5y6y9y13y17y19        | 2166.13 | 119.564 | 25867 | 3 | 722.71  | -6.54  |
| Q9L6N1 METE_SALTY 5-methyltetrahydropteroylriglutamate--homocysteine methyltransferase | 5  |                       | QAGIDLLPVGDFAWYDHVLTTSLLGNV PAR | 52  | 31 | 11 | 41.69  | b5°b5*b5b7*b7y3y5y6y7y24y31  | 3351.79 | 120.036 | 25454 | 3 | 1117.94 | 5.83   |
| Q9L6N1 METE_SALTY 5-methyltetrahydropteroylriglutamate--homocysteine methyltransferase | 6  |                       | DALNSGETAALEEWSAPIQAR           | 360 | 21 | 6  | 18.95  | b2b5b16y5y19y21              | 2229.10 | 81.112  | 24122 | 2 | 1115.05 | 10.40  |
| Q9L6N1 METE_SALTY 5-methyltetrahydropteroylriglutamate--homocysteine methyltransferase | 7  | Carbamidomethyl+C(11) | GMLTGPVTILCWSFPREDVTR           | 549 | 21 | 6  | 30.04  | b2y3y14y16y17y21             | 2435.22 | 98.356  | 23456 | 3 | 812.41  | -0.30  |
| Q9L6N1 METE_SALTY 5-methyltetrahydropteroylriglutamate--homocysteine methyltransferase | 8  | Carbamidomethyl+C(1)  | CVKPPVVIGDISRPAPITVEWAK         | 515 | 23 | 12 | 83.03  | b2b3b4b6b7y3y4y6y15y16y20y23 | 2532.40 | 76.463  | 19609 | 3 | 844.81  | 0.19   |
| Q9L6N1 METE_SALTY 5-methyltetrahydropteroylriglutamate--homocysteine methyltransferase | 9  |                       | LPVDWLLSAGLINGR                 | 279 | 15 | 5  | 18.16  | b2b6y3y12y15                 | 1623.93 | 102.196 | 18020 | 2 | 812.47  | 5.79   |
| Q9L6N1 METE_SALTY 5-methyltetrahydropteroylriglutamate--homocysteine methyltransferase | 10 |                       | QAIIEQER                        | 466 | 8  | 8  | 40.9   | b2*b2y4°y4y5°y5y6y8          | 986.52  | 31.687  | 17473 | 2 | 493.76  | -6.93  |
| Q9L6N1 METE_SALTY 5-methyltetrahydropteroylriglutamate--homocysteine methyltransferase | 11 | Carbamidomethyl+C(11) | GMLTGPVTILCWSFPR                | 549 | 16 | 7  | 35.49  | b2b7b14y1y5y6y9              | 1834.94 | 105.926 | 15881 | 2 | 917.97  | 2.46   |
| Q9L6N1 METE_SALTY 5-methyltetrahydropteroylriglutamate--homocysteine methyltransferase | 12 |                       | LAAITAQDSQR                     | 395 | 11 | 11 | 113.72 | b2b3y3y4y5y6y7y8y9y10y11     | 1173.62 | 34.839  | 14745 | 2 | 587.31  | -1.46  |
| Q9L6N1 METE_SALTY 5-methyltetrahydropteroylriglutamate--homocysteine methyltransferase | 13 |                       | WFNTNYHYIYPEFSK                 | 117 | 15 | 4  | 26.24  | y4°y4y5y8                    | 1944.91 | 78.785  | 35853 | 3 | 648.97  | -9.73  |
| Q9L6N1 METE_SALTY 5-methyltetrahydropteroylriglutamate--homocysteine methyltransferase | 14 |                       | LPAPWTTTIGSFPTTEIR              | 422 | 19 | 3  | 34.55  | y8y9y10                      | 2116.08 | 67.730  | 21782 | 3 | 706.03  | -14.42 |
| Q9L6N1 METE_SALTY 5-methyltetrahydropteroylriglutamate--homocysteine methyltransferase | 15 |                       | TGIAEHIK                        | 458 | 8  | 4  | 54.13  | b4b7y5y7                     | 868.47  | 23.733  | 10813 | 2 | 434.74  | -20.94 |
| Q9L6N1 METE_SALTY 5-methyltetrahydropteroylriglutamate--homocysteine methyltransferase | 16 | Carbamidomethyl+C(1)  | CGELALLR                        | 352 | 8  | 3  | 36.13  | b4b7y6                       | 931.50  | 50.559  | 9588  | 2 | 466.25  | -2.23  |
| Q9L6N1 METE_SALTY 5-methyltetrahydropteroylriglutamate--homocysteine methyltransferase | 17 |                       | DEVADLEAAGIGIIQIDEPALR          | 582 | 22 | 3  | 23.33  | b14b15b18                    | 2308.15 | 93.021  | 7207  | 3 | 770.06  | -21.15 |
| Q9L6N1 METE_SALTY 5-methyltetrahydropteroylriglutamate--homocysteine methyltransferase | 18 |                       | GQQFR                           | 132 | 5  | 3  | 26.46  | b3y3*y3                      | 635.32  | 42.494  | 5020  | 1 | 635.32  | -4.71  |

|                                                                                         |    |                                          |                                |     |    |    |        |                                                                |         |         |        |   |        |        |
|-----------------------------------------------------------------------------------------|----|------------------------------------------|--------------------------------|-----|----|----|--------|----------------------------------------------------------------|---------|---------|--------|---|--------|--------|
| Q9L6N1 METE_SALTY 5-methyltetrahydropteroyltriglutamate--homocysteine methyltransferase | 19 | Carbamidomethyl+C(8)                     | ALWVASSCSLLHSPIDLSVETR         | 315 | 22 | 4  | 13.45  | b5b7°b7y11                                                     | 2441.25 | 88.437  | 2676   | 3 | 814.42 | -1.30  |
| Q9L6N1 METE_SALTY 5-methyltetrahydropteroyltriglutamate--homocysteine methyltransferase | 20 |                                          | FKLPAWPTTTIGSFPQTTEIR          | 420 | 21 | 5  | 26.78  | b3b14y5y7y10                                                   | 2391.27 | 88.531  | 35167  | 3 | 797.76 | -1.43  |
| Q9L6N1 METE_SALTY 5-methyltetrahydropteroyltriglutamate--homocysteine methyltransferase | 21 |                                          | GNLDANHYRTGIAEHK               | 449 | 17 | 3  | 16.34  | b6b15y4                                                        | 1908.98 | 121.320 | 25259  | 2 | 954.99 | 6.20   |
| Q9L6N1 METE_SALTY 5-methyltetrahydropteroyltriglutamate--homocysteine methyltransferase | 22 |                                          | KAQESYWAGNTTR                  | 20  | 13 | 5  | 29.91  | y6y9°y9y12°y12                                                 | 1511.74 | 88.585  | 5425   | 2 | 756.37 | 10.50  |
| Q9L6N1 METE_SALTY 5-methyltetrahydropteroyltriglutamate--homocysteine methyltransferase | 23 |                                          | VKGEPFDR                       | 172 | 8  | 3  | 36.13  | b5y3y5                                                         | 947.51  | 42.473  | 4169   | 2 | 474.26 | 14.04  |
| Q9L6N1 METE_SALTY 5-methyltetrahydropteroyltriglutamate--homocysteine methyltransferase | 24 |                                          | ADLTEKYAQINAIVGK               | 298 | 16 | 3  | 23.72  | b12y3y4                                                        | 1733.93 | 51.426  | 3933   | 3 | 578.65 | -10.00 |
| Q9L6N1 METE_SALTY 5-methyltetrahydropteroyltriglutamate--homocysteine methyltransferase | 25 |                                          | SDWDAYLEWGVAEFRINAATAVAK       | 611 | 22 | 3  | 22.2   | b12y3y4                                                        | 2511.22 | 93.948  | 3632   | 3 | 837.74 | -5.15  |
| Q9L6N1 METE_SALTY 5-methyltetrahydropteroyltriglutamate--homocysteine methyltransferase | 26 | Carbamidomethyl+C(1); Phosphoryl STY(13) | CGELALLRDALNSGETAALEEWS APIQAR | 352 | 29 | 6  | 25.16  | b12b14y10y11y13*y13                                            | 3221.51 | 100.282 | 5385   | 4 | 806.13 | -4.70  |
| Q9L6N1 METE_SALTY 5-methyltetrahydropteroyltriglutamate--homocysteine methyltransferase | 27 |                                          | RPAPITVEWAK                    | 527 | 11 | 0  | 7.26   |                                                                | 1267.70 | 76.514  | 23991  | 2 | 634.35 | -14.73 |
| Q9L6N1 METE_SALTY 5-methyltetrahydropteroyltriglutamate--homocysteine methyltransferase | 28 |                                          | LNSGETAALEEWSAPIQAR            | 362 | 19 | 1  | 7.64   | b13                                                            | 2043.03 | 81.066  | 19624  | 3 | 681.68 | 8.07   |
| P0A7W4 RS5_SALTY 30S ribosomal protein S5                                               | 1  |                                          | AYGSTNPINVVR                   | 126 | 12 | 17 | 138.37 | b2b3b9b11*b11y2y3y4y5y6y7y8y9*y9y10*y10y12                     | 1290.68 | 51.727  | 128865 | 2 | 645.84 | -3.69  |
| P0A7W4 RS5_SALTY 30S ribosomal protein S5                                               | 2  |                                          | VFMQPASEGTGIIAGGAMR            | 93  | 19 | 23 | 192.3  | b1b2b3b4b11b12b13b14b16°b16y1y4y5y6y7y11y12y13y14y15y16*y16y19 | 1892.94 | 68.772  | 102798 | 2 | 946.98 | 3.80   |
| P0A7W4 RS5_SALTY 30S ribosomal protein S5                                               | 3  |                                          | ATIDGLENMNSPEMVAAK             | 138 | 18 | 14 | 78.49  | b15b18y2y3y4y8y11y12°y12*y12y14y15°y15y18                      | 1890.91 | 64.010  | 61108  | 2 | 945.96 | 7.62   |
| P0A7W4 RS5_SALTY 30S ribosomal protein S5                                               | 4  |                                          | SVEEILGK                       | 159 | 8  | 5  | 40.9   | b1y3y5y6y8                                                     | 874.48  | 50.837  | 52811  | 2 | 437.74 | -8.17  |
| P0A7W4 RS5_SALTY 30S ribosomal protein S5                                               | 5  |                                          | ATIDGLENMNSPEMVAAKR            | 138 | 19 | 9  | 69.02  | y1y3y4y8y10*y11y15y16y17                                       | 2046.99 | 59.765  | 35589  | 3 | 683.00 | -4.41  |
| P0A7W4 RS5_SALTY 30S ribosomal protein S5                                               | 6  |                                          | VGFGYGK                        | 45  | 7  | 6  | 40.5   | b5b7y2y3y6y7                                                   | 727.37  | 40.234  | 19679  | 2 | 364.19 | -7.97  |
| P0A7W4 RS5_SALTY 30S ribosomal protein S5                                               | 7  |                                          | AREVPAAIQK                     | 52  | 10 | 3  | 33.93  | b6b7b9                                                         | 1082.63 | 29.192  | 5026   | 2 | 541.82 | -5.86  |
| P0A7W4 RS5_SALTY 30S ribosomal protein S5                                               | 8  |                                          | AVLEVAGVHNVLAK                 | 112 | 14 | 9  | 100.46 | b3b4b13y3y6y8y9y10y12                                          | 1419.80 | 61.011  | 107995 | 3 | 473.94 | -20.72 |
| P0A7W4 RS5_SALTY 30S ribosomal protein S5                                               | 9  |                                          | LIAVNR                         | 14  | 6  | 2  | 26.87  | y4y5                                                           | 685.43  | 33.390  | 9542   | 1 | 685.43 | -5.61  |
| P0A7W4 RS5_SALTY 30S ribosomal protein S5                                               | 10 |                                          | AHIEK                          | 1   | 5  | 3  | 39.69  | b3b4y4                                                         | 597.33  | 23.719  | 8475   | 1 | 597.33 | -9.40  |
| P0A7W4 RS5_SALTY 30S ribosomal protein S5                                               | 11 |                                          | IFSFTALTTVVGDNRGVFGYGK         | 29  | 23 | 3  | 22.09  | b5y4y5                                                         | 2362.24 | 73.611  | 191825 | 4 | 591.31 | 7.03   |
| P0A7W4 RS5_SALTY 30S ribosomal protein S5                                               | 12 | Oxidation+M(3)                           | VFMQPASEGTGIIAGGAMR            | 93  | 19 | 4  | 20.73  | b5b9y4y6                                                       | 1908.91 | 40.714  | 54869  | 3 | 636.97 | -11.64 |

|                                                                  |    |                      |                                |     |    |    |       |                               |         |         |        |   |         |        |
|------------------------------------------------------------------|----|----------------------|--------------------------------|-----|----|----|-------|-------------------------------|---------|---------|--------|---|---------|--------|
| [P0A7W4]RS5_SALTY 30S ribosomal protein S5                       | 13 |                      | MNSPEMVAAKR                    | 146 | 11 | 0  | 5.65  |                               | 1233.59 | 59.806  | 53366  | 3 | 411.87  | -12.96 |
| [P0A7W4]RS5_SALTY 30S ribosomal protein S5                       | 14 |                      | AYGSTNPINVVR                   | 126 | 12 | 0  | 2.82  |                               | 1273.64 | 51.697  | 1670   | 2 | 637.33  | -5.08  |
| [P16657]FABI_SALTY Enoyl-[acyl-carrier-protein] reductase [NADH] | 1  |                      | LSIAYGIAQAMHREGAELAFYQNDK      | 17  | 26 | 8  | 25.6  | b4°b4b21*b21y3°y3y4y26        | 2897.44 | 107.392 | 140071 | 4 | 725.11  | 4.30   |
| [P16657]FABI_SALTY Enoyl-[acyl-carrier-protein] reductase [NADH] | 2  |                      | YMANAMGPEGVR                   | 171 | 12 | 10 | 61.2  | b12*b12y5y6y7°y7y8y11°y11*y11 | 1295.60 | 51.384  | 80034  | 2 | 648.31  | 13.66  |
| [P16657]FABI_SALTY Enoyl-[acyl-carrier-protein] reductase [NADH] | 3  |                      | AIPNYNVMLAK                    | 151 | 12 | 6  | 40.31 | b8b9b10y1y3y12                | 1290.69 | 58.528  | 26443  | 2 | 645.85  | 3.12   |
| [P16657]FABI_SALTY Enoyl-[acyl-carrier-protein] reductase [NADH] | 4  |                      | TMLNPGSALLTLSYLGAER            | 132 | 19 | 11 | 53.78 | b2b6b14y1y3°y3y4y6y7y15y19    | 2007.08 | 101.863 | 10621  | 2 | 1004.04 | 9.97   |
| [P16657]FABI_SALTY Enoyl-[acyl-carrier-protein] reductase [NADH] | 5  |                      | ILVTGVASK                      | 8   | 9  | 3  | 38.3  | y4y6y7                        | 887.55  | 42.452  | 7104   | 2 | 444.28  | -9.63  |
| [P16657]FABI_SALTY Enoyl-[acyl-carrier-protein] reductase [NADH] | 6  |                      | FDGFVHSIGFAPGDQLDGDYVNAVTR     | 84  | 26 | 4  | 12.15 | b3b9°b9y12                    | 2797.33 | 83.980  | 4840   | 4 | 700.09  | 2.36   |
| [P16657]FABI_SALTY Enoyl-[acyl-carrier-protein] reductase [NADH] | 7  |                      | VAHDISSYSFVAMAK                | 114 | 15 | 3  | 18.16 | b4b10y8                       | 1625.79 | 77.715  | 3521   | 2 | 813.40  | -6.83  |
| [P16657]FABI_SALTY Enoyl-[acyl-carrier-protein] reductase [NADH] | 8  |                      | EGAEALFTYQNDK                  | 30  | 13 | 4  | 25.44 | b8y6*y6y7                     | 1485.71 | 65.947  | 8776   | 3 | 495.91  | 15.28  |
| [P16657]FABI_SALTY Enoyl-[acyl-carrier-protein] reductase [NADH] | 9  |                      | MGFLSGK                        | 0   | 7  | 4  | 40.5  | b3b5b6°b6                     | 739.39  | 35.328  | 8047   | 1 | 739.39  | 18.24  |
| [P16657]FABI_SALTY Enoyl-[acyl-carrier-protein] reductase [NADH] | 10 |                      | EGFKVAHDISSYSFVAMAK            | 110 | 19 | 4  | 14.96 | b10°b10y8y12                  | 2087.01 | 101.314 | 2116   | 2 | 1044.01 | -9.24  |
| [P16657]FABI_SALTY Enoyl-[acyl-carrier-protein] reductase [NADH] | 11 |                      | VAHDISSYSFV                    | 114 | 11 | 1  | 7.26  | y4                            | 1224.59 | 77.674  | 2047   | 2 | 612.80  | 3.09   |
| [P60446]RL3_SALTY 50S ribosomal protein L3                       | 1  |                      | VTVQSLDVVR                     | 169 | 10 | 10 | 68.17 | b2y2y4°y4y5y6y7°y7y8y10       | 1115.63 | 57.240  | 80296  | 2 | 558.32  | -8.86  |
| [P60446]RL3_SALTY 50S ribosomal protein L3                       | 2  |                      | IFTEDGVSIPTVIEVEANR            | 13  | 20 | 9  | 37.65 | b1b7b10y4*y4y5y11y13y20       | 2188.17 | 88.967  | 46795  | 2 | 1094.59 | 10.71  |
| [P60446]RL3_SALTY 50S ribosomal protein L3                       | 3  |                      | DLANDGYR                       | 38  | 8  | 7  | 62.59 | b5y3y5y6°y6y7y8               | 923.42  | 32.508  | 23036  | 2 | 462.22  | 1.92   |
| [P60446]RL3_SALTY 50S ribosomal protein L3                       | 4  |                      | TQDATHGNSLSHR                  | 128 | 13 | 10 | 74.83 | b2y1y2y3y4y5y6y7y11y13        | 1423.65 | 15.546  | 10979  | 3 | 475.22  | -13.55 |
| [P60446]RL3_SALTY 50S ribosomal protein L3                       | 5  |                      | LAEGEEYTVGQSIISVELFADVKK       | 83  | 23 | 4  | 19.47 | b6b11b15*b15                  | 2512.26 | 91.115  | 4824   | 4 | 628.82  | -10.01 |
| [P60446]RL3_SALTY 50S ribosomal protein L3                       | 6  |                      | NLLLVK                         | 184 | 6  | 3  | 40.1  | b3y3y4                        | 699.47  | 56.854  | 17956  | 1 | 699.47  | -5.50  |
| [P60446]RL3_SALTY 50S ribosomal protein L3                       | 7  |                      | GLWEFR                         | 77  | 6  | 2  | 26.87 | b3y4                          | 807.40  | 70.466  | 17271  | 2 | 404.21  | -13.98 |
| [P60446]RL3_SALTY 50S ribosomal protein L3                       | 8  |                      | LAEGEEYTVGQSIISVELFADV K       | 83  | 22 | 10 | 54.92 | b3b7b11°b11b12°b12b14y9y20y21 | 2384.20 | 136.469 | 3147   | 2 | 1192.60 | 3.69   |
| [P60446]RL3_SALTY 50S ribosomal protein L3                       | 9  |                      | WNFR                           | 124 | 4  | 1  | 12.83 | b3                            | 622.31  | 46.055  | 2495   | 1 | 622.31  | -5.79  |
| [P60446]RL3_SALTY 50S ribosomal protein L3                       | 10 |                      | VDAER                          | 179 | 5  | 1  | 13.23 | y4                            | 589.29  | 68.061  | 1795   | 1 | 589.29  | 1.14   |
| [P60446]RL3_SALTY 50S ribosomal protein L3                       | 11 | Carbamidomethyl+C(9) | GGVPGATGCDLIVKPAVKA            | 190 | 19 | 6  | 53.48 | b3b4y5y6y7y13                 | 1809.97 | 56.903  | 57141  | 3 | 603.99  | -13.02 |
| [P60446]RL3_SALTY 50S ribosomal protein L3                       | 12 |                      | IFTEDGVSIPTVIEVEANRVTQVK       | 13  | 25 | 4  | 23.12 | b3b4b10y16                    | 2743.48 | 95.708  | 23493  | 3 | 915.17  | -2.31  |
| [P60446]RL3_SALTY 50S ribosomal protein L3                       | 13 |                      | VTVQSLDVVRVDAER                | 169 | 15 | 3  | 24.18 | b7b8y9                        | 1685.91 | 119.804 | 8071   | 2 | 843.46  | -6.01  |
| [P60446]RL3_SALTY 50S ribosomal protein L3                       | 14 |                      | TQDATHGNSLSHRVPGSIGQNQT<br>PGK | 128 | 26 | 3  | 12.15 | b14y11y15                     | 2687.31 | 100.367 | 1693   | 2 | 1344.16 | -6.54  |
| [P60446]RL3_SALTY 50S ribosomal protein L3                       | 15 | Phosphoryl STY(8)    | IFTEDGVSIPTVIEVEANR            | 13  | 20 | 3  | 14.39 | b7b12_HPO3 b12y14             | 2268.10 | 75.254  | 32293  | 3 | 756.70  | -4.52  |
| [P60446]RL3_SALTY 50S ribosomal protein L3                       | 16 | Phosphoryl STY(8)    | LAEGEEYTVGQSIISVELFADV K       | 83  | 22 | 3  | 22.2  | b6b7y11                       | 2464.11 | 108.290 | 3283   | 3 | 822.04  | -14.27 |

|                                                                 |    |                       |                                  |     |    |    |        |                                                 |         |         |        |   |         |        |
|-----------------------------------------------------------------|----|-----------------------|----------------------------------|-----|----|----|--------|-------------------------------------------------|---------|---------|--------|---|---------|--------|
| [P60446]RL3_SALTY 50S ribosomal protein L3                      | 17 |                       | LANDGYR                          | 39  | 7  | 0  | 1.21   |                                                 | 808.40  | 32.496  | 10009  | 2 | 404.70  | 7.32   |
| [P53636]SODC1_SALTY Superoxide dismutase [Cu-Zn] 1              | 1  | Carbamidomethyl+C(3)  | FACGVIEK                         | 169 | 8  | 11 | 75.83  | b2b6y1y2*y2y3y4y5y6y7y8                         | 923.46  | 41.593  | 172261 | 2 | 462.23  | -9.72  |
| [P53636]SODC1_SALTY Superoxide dismutase [Cu-Zn] 1              | 2  |                       | EVPALMAGGHLDPEK                  | 84  | 15 | 13 | 58.96  | b2b3*b3b6b11b12*b12y1y2y3y9y13y15               | 1563.76 | 58.010  | 38581  | 3 | 521.93  | -13.58 |
| [P53636]SODC1_SALTY Superoxide dismutase [Cu-Zn] 1              | 3  |                       | GGDNYSDKPAPLGGGGAR               | 151 | 18 | 16 | 144.69 | b4*b4b5*b5b7b10*b10y3y4y5y6y7y8y9y10y11         | 1688.77 | 33.990  | 95651  | 3 | 563.60  | -16.34 |
| [P53636]SODC1_SALTY Superoxide dismutase [Cu-Zn] 1              | 4  |                       | HLGPYNDKGHLGDLPLVNVADGTATYPLLAPR | 102 | 33 | 5  | 24.45  | b11b16*b16y5y6                                  | 3441.78 | 81.868  | 45549  | 4 | 861.20  | -3.62  |
| [P53636]SODC1_SALTY Superoxide dismutase [Cu-Zn] 1              | 5  |                       | EVPALMAGGHLDPEKTGK               | 84  | 18 | 7  | 40.87  | b6b12y4y6*y6y7y16                               | 1849.93 | 53.304  | 32993  | 3 | 617.31  | -11.15 |
| [P53636]SODC1_SALTY Superoxide dismutase [Cu-Zn] 1              | 6  | Oxidation+M(6)        | EVPALMAGGHLDPEK                  | 84  | 15 | 3  | 18.16  | b10y6y11                                        | 1579.78 | 55.082  | 2124   | 2 | 790.39  | -0.31  |
| [P53636]SODC1_SALTY Superoxide dismutase [Cu-Zn] 1              | 7  |                       | PALMAGGHLDPEK                    | 86  | 13 | 2  | 14.93  | b3b9                                            | 1335.68 | 58.033  | 7680   | 2 | 668.34  | 7.49   |
| [P53636]SODC1_SALTY Superoxide dismutase [Cu-Zn] 1              | 8  |                       | EVPALMAGGHLDPEK                  | 84  | 15 | 0  | 4.03   |                                                 | 1545.76 | 58.009  | 8358   | 3 | 515.92  | -7.98  |
| [Q8ZQU3]DHSA_SALTY Succinate dehydrogenase flavoprotein subunit | 1  |                       | EFDVAVVIGAGGAGMR                 | 6   | 15 | 7  | 37.14  | b5b9b13b15y6y8y15                               | 1449.70 | 58.048  | 49730  | 3 | 483.91  | -8.00  |
| [Q8ZQU3]DHSA_SALTY Succinate dehydrogenase flavoprotein subunit | 2  |                       | TGPEAILELEHMGLPFSR               | 90  | 18 | 18 | 176.68 | b5b6y1y3*y3y4y6y7y8y10y11y12y13y14*y14y15y16y18 | 1996.99 | 94.532  | 45595  | 3 | 666.34  | -10.88 |
| [Q8ZQU3]DHSA_SALTY Succinate dehydrogenase flavoprotein subunit | 3  | Carbamidomethyl+C(18) | TFAHVDPVKEPIPIPTCHYMMGGIPTK      | 335 | 28 | 7  | 31.19  | b5b6b9y2y3y5y10                                 | 3135.55 | 74.353  | 43894  | 4 | 784.64  | -10.28 |
| [Q8ZQU3]DHSA_SALTY Succinate dehydrogenase flavoprotein subunit | 4  |                       | DASESDVEGSLER                    | 430 | 13 | 5  | 29.91  | y5*y5y7y9y13                                    | 1393.62 | 42.512  | 8229   | 2 | 697.31  | 10.34  |
| [Q8ZQU3]DHSA_SALTY Succinate dehydrogenase flavoprotein subunit | 5  | Carbamidomethyl+C(13) | FDFPERDDANWLCHTLYQPQTESMTR       | 542 | 26 | 4  | 26.54  | y3y6y8y11                                       | 3257.48 | 81.012  | 5903   | 3 | 1086.50 | 11.02  |
| [Q8ZQU3]DHSA_SALTY Succinate dehydrogenase flavoprotein subunit | 6  | Carbamidomethyl+C(5)  | ALQECMQHNFSVFR                   | 461 | 14 | 5  | 24.75  | b4*b4y7y8y14                                    | 1766.82 | 64.399  | 5122   | 2 | 883.91  | 6.15   |
| [Q8ZQU3]DHSA_SALTY Succinate dehydrogenase flavoprotein subunit | 7  | Carbamidomethyl+C(29) | AGVPVQDMEMWQFHPTGIAGAGVLVTEGCR   | 228 | 30 | 7  | 19.35  | b7*b7*b7b9b11y3y7                               | 3213.56 | 93.790  | 3949   | 5 | 643.52  | 10.48  |
| [Q8ZQU3]DHSA_SALTY Succinate dehydrogenase flavoprotein subunit | 8  | Carbamidomethyl+C(3)  | VECLELDNLMETAYATAVSANFR          | 510 | 23 | 4  | 20.15  | b10y5y8y10                                      | 2617.22 | 110.488 | 2147   | 3 | 873.08  | -4.20  |
| [Q8ZQU3]DHSA_SALTY Succinate dehydrogenase flavoprotein subunit | 9  |                       | LGGNSLLDLVVFGRR                  | 399 | 14 | 3  | 27.09  | y4y5y8                                          | 1459.83 | 104.575 | 21891  | 2 | 730.42  | 3.60   |
| [Q8ZQU3]DHSA_SALTY Succinate dehydrogenase flavoprotein subunit | 10 | Carbamidomethyl+C(7)  | DDANWLCHTLYQPQTESMTR             | 548 | 20 | 3  | 21.18  | y5y7y9                                          | 2466.12 | 69.268  | 16242  | 3 | 822.71  | 13.66  |
| [Q8ZQU3]DHSA_SALTY Succinate dehydrogenase flavoprotein subunit | 11 |                       | DLAGR                            | 281 | 5  | 2  | 26.46  | b4y4                                            | 531.29  | 28.951  | 11600  | 1 | 531.29  | 5.05   |
| [Q8ZQU3]DHSA_SALTY Succinate dehydrogenase flavoprotein subunit | 12 |                       | ATVLATGGAGR                      | 196 | 11 | 3  | 36.09  | y3y5y7                                          | 973.53  | 31.638  | 9224   | 2 | 487.27  | -9.72  |
| [Q8ZQU3]DHSA_SALTY Succinate dehydrogenase flavoprotein subunit | 13 |                       | LPVR                             | 2   | 4  | 1  | 12.83  | b3                                              | 484.32  | 77.566  | 8315   | 1 | 484.32  | -9.89  |
| [Q8ZQU3]DHSA_SALTY Succinate dehydrogenase flavoprotein subunit | 14 |                       | IYQRPFGGQSK                      | 113 | 11 | 5  | 36.09  | y3*y3*y3y7y10                                   | 1280.65 | 35.310  | 7805   | 2 | 640.83  | -22.21 |
| [Q8ZQU3]DHSA_SALTY Succinate dehydrogenase flavoprotein subunit | 15 |                       | TFAHVDPVK                        | 335 | 9  | 5  | 30.51  | b3*b3b7*b7y3                                    | 1013.55 | 53.154  | 4545   | 2 | 507.28  | 11.20  |
| [Q8ZQU3]DHSA_SALTY Succinate dehydrogenase flavoprotein subunit | 16 |                       | TESR                             | 533 | 4  | 2  | 12.83  | b3*b3                                           | 492.24  | 36.909  | 4396   | 1 | 492.24  | -9.05  |
| [Q8ZQU3]DHSA_SALTY Succinate dehydrogenase flavoprotein subunit | 17 |                       | NHTTIFSEWYALDLVK                 | 155 | 16 | 6  | 42.7   | b5b8b9*b9b10y9                                  | 1936.98 | 96.129  | 1833   | 3 | 646.33  | -1.95  |
| [Q8ZQU3]DHSA_SALTY Succinate dehydrogenase flavoprotein subunit | 18 |                       | AAGLHLQESIAEQGVLR                | 413 | 17 | 4  | 23.33  | b12y10y11*y11                                   | 1791.97 | 63.226  | 1633   | 2 | 896.49  | -0.89  |
| [Q8ZQU3]DHSA_SALTY Succinate dehydrogenase flavoprotein subunit | 19 |                       | IYQRPFGGQSKNFGGEQAAR             | 113 | 20 | 6  | 32.25  | b7b9b10*b10b18y14                               | 2211.09 | 68.586  | 454964 | 3 | 737.70  | -6.85  |

|                                                                |    |                                       |                                      |     |    |    |       |                                            |         |         |        |   |         |        |
|----------------------------------------------------------------|----|---------------------------------------|--------------------------------------|-----|----|----|-------|--------------------------------------------|---------|---------|--------|---|---------|--------|
| Q8ZQU3 DHSA_SALTY Succinate dehydrogenase flavoprotein subunit | 20 |                                       | EGDAMAKGLEQLK                        | 475 | 13 | 5  | 34.48 | b10°b10b11y4y12                            | 1389.69 | 63.771  | 6041   | 2 | 695.35  | -13.35 |
| Q8ZQU3 DHSA_SALTY Succinate dehydrogenase flavoprotein subunit | 21 | Carbamidomethyl+C(15)                 | LDDTSSEFNTQRVECLELDNLME TAYATAVSANFR | 498 | 35 | 8  | 28.95 | b12y5y7y8y10°y10*y10y13                    | 4010.88 | 110.933 | 5431   | 3 | 1337.63 | 10.35  |
| Q8ZQU3 DHSA_SALTY Succinate dehydrogenase flavoprotein subunit | 22 |                                       | LDDGRIYQRPFGGQSK                     | 108 | 16 | 3  | 17.18 | b5y4y11                                    | 1836.91 | 78.677  | 4634   | 3 | 612.97  | -13.69 |
| Q8ZQU3 DHSA_SALTY Succinate dehydrogenase flavoprotein subunit | 23 | Carbamidomethyl+C(9); Oxidation+M()   | EIPVPIPTCHYMMGGIPTK                  | 344 | 19 | 5  | 42.09 | b9b10b11y3y10                              | 2157.08 | 83.368  | 42773  | 2 | 1079.04 | 12.56  |
| Q8ZQU3 DHSA_SALTY Succinate dehydrogenase flavoprotein subunit | 24 | Oxidation+M(12)                       | TGPEAILELEHMGLPFSR                   | 90  | 18 | 4  | 29.18 | b5b12y10y11                                | 2013.02 | 70.884  | 6226   | 3 | 671.68  | 4.24   |
| Q8ZQU3 DHSA_SALTY Succinate dehydrogenase flavoprotein subunit | 25 | Carbamidomethyl+C(3); Oxidation+M(10) | VECLELDNLMETAYATAVSANFR              | 510 | 23 | 5  | 24.6  | b10b22y3y5y10                              | 2633.19 | 70.807  | 4616   | 3 | 878.40  | -10.85 |
| Q8ZQU3 DHSA_SALTY Succinate dehydrogenase flavoprotein subunit | 26 | Oxidation+M(14)                       | EFDVVIGAGGAGMR                       | 6   | 15 | 4  | 18.16 | b8b11°b11y9                                | 1465.72 | 65.385  | 2216   | 2 | 733.36  | 7.25   |
| Q8ZQU3 DHSA_SALTY Succinate dehydrogenase flavoprotein subunit | 27 |                                       | EFDVVI                               | 6   | 7  | 1  | 7.26  | y5                                         | 792.42  | 58.022  | 2207   | 2 | 396.72  | 12.32  |
| Q7CQN4 LPP1_SALTY Major outer membrane lipoprotein 1           | 1  |                                       | VDQLSNDVNAMR                         | 40  | 12 | 6  | 34.29 | b4y4*y4y7y8y12                             | 1361.65 | 49.436  | 32622  | 2 | 681.33  | 1.88   |
| Q7CQN4 LPP1_SALTY Major outer membrane lipoprotein 1           | 2  |                                       | SDVQAAKDDAAR                         | 52  | 12 | 5  | 49.74 | b3y3y4y6y9                                 | 1246.59 | 18.753  | 24149  | 3 | 416.20  | -13.81 |
| Q7CQN4 LPP1_SALTY Major outer membrane lipoprotein 1           | 3  |                                       | IDQLSSDVQTLNAK                       | 26  | 14 | 3  | 19.31 | b3b5y9                                     | 1531.80 | 53.514  | 7089   | 2 | 766.41  | 4.46   |
| Q7CQN4 LPP1_SALTY Major outer membrane lipoprotein 1           | 4  |                                       | VDQLSNDVNAMRSDVQAAK                  | 40  | 19 | 3  | 14.96 | b5b11y5                                    | 2060.99 | 57.110  | 2707   | 3 | 687.67  | -4.15  |
| Q7CQN4 LPP1_SALTY Major outer membrane lipoprotein 1           | 5  |                                       | IDQLSSDVQTLNAKVDQLSNDVN AMR          | 26  | 26 | 4  | 18.31 | b10y3y6y9                                  | 2874.42 | 92.125  | 1669   | 3 | 958.81  | -1.87  |
| P0A2S0 LRP_SALTY Leucine-reonsive regulatory protein           | 1  |                                       | TYVVMEEVK                            | 145 | 9  | 7  | 30.51 | b2b8y2y5°y5y7y9                            | 1097.55 | 53.130  | 24457  | 2 | 549.28  | -3.11  |
| P0A2S0 LRP_SALTY Leucine-reonsive regulatory protein           | 2  | Carbamidomethyl+C(8)                  | VGLSPTCLER                           | 37  | 11 | 7  | 56.02 | b2b4y4y5y7y8y11                            | 1228.63 | 52.414  | 17186  | 2 | 614.82  | -1.19  |
| P0A2S0 LRP_SALTY Leucine-reonsive regulatory protein           | 3  |                                       | LVIK                                 | 158 | 4  | 1  | 12.83 | y3                                         | 472.35  | 56.857  | 9049   | 1 | 472.35  | -6.65  |
| P0A2S0 LRP_SALTY Leucine-reonsive regulatory protein           | 4  | Carbamidomethyl+C(22)                 | GAPDVFEQFNAAVQKLEEIQECHL VSGDFDYLLK  | 84  | 34 | 3  | 10.99 | b5b8y12                                    | 3909.90 | 118.462 | 10561  | 4 | 978.23  | -0.75  |
| P0A7X0 RS8_SALTY 30S ribosomal protein S8                      | 1  |                                       | SMQDPIADMLTR                         | 1   | 12 | 10 | 82.89 | b2b3b4y2y3y4y6y8y9y12                      | 1377.65 | 78.988  | 102178 | 2 | 689.33  | 0.71   |
| P0A7X0 RS8_SALTY 30S ribosomal protein S8                      | 2  |                                       | AVVESIQR                             | 69  | 8  | 9  | 49.36 | b2b5y4*y4y5°y5y6*y6y8                      | 901.50  | 33.484  | 80421  | 2 | 451.26  | -7.24  |
| P0A7X0 RS8_SALTY 30S ribosomal protein S8                      | 3  |                                       | AAVTMPSSK                            | 22  | 9  | 7  | 57.55 | y3y4°y4y6y7°y7y9                           | 891.46  | 32.038  | 75104  | 2 | 446.24  | 2.94   |
| P0A7X0 RS8_SALTY 30S ribosomal protein S8                      | 4  |                                       | MSMQDPIADMLTR                        | 0   | 13 | 3  | 25.44 | b4y4y5                                     | 1508.70 | 47.354  | 1731   | 3 | 503.57  | 8.09   |
| P41033 PCKA_SALTY Phohoenolpyruvate carboxykinase [ATP]        | 1  |                                       | LTANQTYQHFLSGFTAK                    | 371 | 17 | 16 | 91.74 | b1b2b8°b8b11y1y2y3°y3y6 y10y12y14y15y16y17 | 1926.95 | 68.607  | 37965  | 3 | 642.99  | -12.54 |
| P41033 PCKA_SALTY Phohoenolpyruvate carboxykinase [ATP]        | 2  |                                       | NTYASPEQWQEK                         | 495 | 12 | 3  | 35.53 | y8y9y10                                    | 1480.69 | 45.302  | 22071  | 2 | 740.85  | 13.52  |
| P41033 PCKA_SALTY Phohoenolpyruvate carboxykinase [ATP]        | 3  |                                       | MQAAGAQAYL VNTGWNGTGKR               | 426 | 21 | 5  | 18.95 | b2b8b12y11y19                              | 2194.08 | 60.581  | 21230  | 3 | 732.03  | 0.78   |
| P41033 PCKA_SALTY Phohoenolpyruvate carboxykinase [ATP]        | 4  |                                       | GVLTNLGAVAVDTGIFTGR                  | 45  | 19 | 9  | 52.26 | b19y1y2y7y8°y8y9y10y18                     | 1861.03 | 94.542  | 17694  | 2 | 931.02  | 4.66   |
| P41033 PCKA_SALTY Phohoenolpyruvate carboxykinase [ATP]        | 5  |                                       | GMFSVMNYLLPLK                        | 212 | 13 | 3  | 25.44 | b10y3y4                                    | 1512.80 | 109.748 | 16147  | 2 | 756.90  | 1.69   |



|                                                          |    |                                      |                                    |     |    |    |       |                                |         |         |       |   |         |        |
|----------------------------------------------------------|----|--------------------------------------|------------------------------------|-----|----|----|-------|--------------------------------|---------|---------|-------|---|---------|--------|
| [P41033]PCKA_SALTY Phohoenolpyruvate carboxykinase [ATP] | 6  |                                      | YIVRDDTTTRDTLWWS DK                | 69  | 17 | 3  | 16.34 | b8y5y7                         | 2170.07 | 99.764  | 11100 | 3 | 724.03  | 4.61   |
| [P41033]PCKA_SALTY Phohoenolpyruvate carboxykinase [ATP] | 7  |                                      | AYGINDVQDIVYNPSYDTLYQEEL NPGLEGYER | 12  | 33 | 10 | 34.76 | b3b5b7b10°b10y2y4y7y8°y8       | 3837.81 | 91.723  | 8511  | 3 | 1279.94 | 8.40   |
| [P41033]PCKA_SALTY Phohoenolpyruvate carboxykinase [ATP] | 8  |                                      | IQLIGGTWYGGEMK                     | 197 | 14 | 3  | 27.09 | y5y11y12                       | 1552.78 | 77.097  | 7005  | 2 | 776.90  | 0.94   |
| [P41033]PCKA_SALTY Phohoenolpyruvate carboxykinase [ATP] | 9  |                                      | EQGLNSEN FVAFNLTER                 | 180 | 17 | 10 | 42.81 | b11°b11b13y2°y2y3y10°y10y11y14 | 1967.94 | 85.154  | 3762  | 3 | 656.65  | -1.12  |
| [P41033]PCKA_SALTY Phohoenolpyruvate carboxykinase [ATP] | 10 |                                      | DALLENVTVREDGTVD FDDGSK            | 305 | 22 | 4  | 13.45 | b6b8°b8y6                      | 2395.09 | 71.346  | 2707  | 3 | 799.04  | -13.35 |
| [P41033]PCKA_SALTY Phohoenolpyruvate carboxykinase [ATP] | 11 |                                      | MQAAGAQA YLVNTGWNGTGK              | 426 | 20 | 6  | 14.39 | b11°b11y2y5y11°y11             | 2038.00 | 65.417  | 2187  | 2 | 1019.50 | 9.40   |
| [P41033]PCKA_SALTY Phohoenolpyruvate carboxykinase [ATP] | 12 |                                      | AIIDAILNGSLD NAETFR                | 454 | 18 | 5  | 24.85 | b5y2y3y5y7                     | 1932.98 | 112.570 | 1689  | 2 | 966.99  | -11.11 |
| [P41033]PCKA_SALTY Phohoenolpyruvate carboxykinase [ATP] | 13 |                                      | VSYPYIHIDNIVKPVSK                  | 332 | 17 | 7  | 44.64 | b6b7°b7b10°b10b11y9            | 1972.05 | 66.226  | 44464 | 4 | 493.77  | -20.24 |
| [P41033]PCKA_SALTY Phohoenolpyruvate carboxykinase [ATP] | 14 |                                      | VNNLTPQDLK                         | 2   | 10 | 3  | 28.7  | b3y4y5                         | 1141.62 | 44.888  | 13704 | 2 | 571.31  | -2.89  |
| [P41033]PCKA_SALTY Phohoenolpyruvate carboxykinase [ATP] | 15 | Carbamidomethyl+C(21)                | LIGDDEHG WDDDG VFNFE GG CYAK       | 263 | 24 | 7  | 27.62 | b8b14y9°y9y13°y13y14           | 2716.15 | 80.084  | 13438 | 3 | 906.05  | 7.37   |
| [P41033]PCKA_SALTY Phohoenolpyruvate carboxykinase [ATP] | 16 |                                      | YTDTPAGEALVSAGPK                   | 521 | 16 | 3  | 24.89 | b6b8b14                        | 1576.78 | 62.691  | 7244  | 2 | 788.89  | -4.10  |
| [P41033]PCKA_SALTY Phohoenolpyruvate carboxykinase [ATP] | 17 |                                      | NDNKPLSQETWQH LK                   | 90  | 15 | 5  | 25.83 | b5°b5b10y5y7                   | 1837.92 | 80.247  | 2838  | 2 | 919.46  | 1.66   |
| [P41033]PCKA_SALTY Phohoenolpyruvate carboxykinase [ATP] | 18 |                                      | GDVAVFFGLSGTGK T TLSTD PK          | 239 | 22 | 9  | 42.89 | b4b8°b8b11b20y3y5y8°y8         | 2198.10 | 116.161 | 35968 | 3 | 733.37  | -13.44 |
| [P41033]PCKA_SALTY Phohoenolpyruvate carboxykinase [ATP] | 19 |                                      | NDNKPLSQETWQH LKGLVTHQLSGK         | 90  | 25 | 4  | 18.64 | b4b9°b9b11                     | 2858.49 | 81.921  | 3436  | 3 | 953.50  | 0.17   |
| [P41033]PCKA_SALTY Phohoenolpyruvate carboxykinase [ATP] | 20 | Phosphoryl STY(7)                    | EAEPEIYHAIR                        | 293 | 11 | 3  | 36.09 | y3y6y10                        | 1407.63 | 136.516 | 2965  | 1 | 1407.63 | 8.85   |
| [P41033]PCKA_SALTY Phohoenolpyruvate carboxykinase [ATP] | 21 | Carbamidomethyl+C(7); Oxidation+M(5) | GIASMHC SANVGEK                    | 225 | 14 | 4  | 19.31 | b4°b4b6y8                      | 1476.66 | 42.520  | 6260  | 2 | 738.84  | 4.30   |
| [P41033]PCKA_SALTY Phohoenolpyruvate carboxykinase [ATP] | 22 |                                      | DALLENVTVREDGTVD FDDG              | 305 | 20 | 0  | 6.86  |                                | 2180.03 | 71.371  | 6840  | 2 | 1090.52 | 14.89  |
| [P41033]PCKA_SALTY Phohoenolpyruvate carboxykinase [ATP] | 23 |                                      | TANQTQYHFLSGFTAK                   | 372 | 16 | 5  | 20.89 | b3°b3b4°b4°b4                  | 1813.86 | 68.572  | 1784  | 2 | 907.43  | -14.40 |
| [P37412]LEU3_SALTY 3-isopropylmalate dehydrogenase       | 1  |                                      | NIANPIAQILSLALLLR                  | 293 | 17 | 7  | 33.75 | b1b2y5y7y8y13y17               | 1833.15 | 137.380 | 7231  | 2 | 917.08  | 9.86   |
| [P37412]LEU3_SALTY 3-isopropylmalate dehydrogenase       | 2  |                                      | EIVNDVAK                           | 206 | 8  | 8  | 64.36 | b5b6b7y5°y5y6°y6y8             | 887.47  | 33.523  | 5688  | 2 | 444.24  | -9.97  |

|                                                    |    |                                             |                                     |     |    |    |        |                                            |         |         |       |   |         |        |
|----------------------------------------------------|----|---------------------------------------------|-------------------------------------|-----|----|----|--------|--------------------------------------------|---------|---------|-------|---|---------|--------|
| [P37412]LEU3_SALTY 3-isopropylmalate dehydrogenase | 3  | Carbamidomethyl+C(12)                       | ADIAANGFDILCVR                      | 124 | 14 | 5  | 19.31  | b8°b8b10°b10y3                             | 1534.79 | 81.021  | 61570 | 2 | 767.90  | 15.59  |
| [P37412]LEU3_SALTY 3-isopropylmalate dehydrogenase | 4  |                                             | NYHIAVLPGDGIGPEVMAQALK              | 3   | 22 | 5  | 24.25  | b10b11b14y15°y15                           | 2293.16 | 101.897 | 21327 | 3 | 765.06  | -18.52 |
| [P37412]LEU3_SALTY 3-isopropylmalate dehydrogenase | 5  | Carbamidomethyl+C(9)                        | LYQGLEAFCLPLR                       | 112 | 12 | 3  | 29.51  | y5y8y9                                     | 1466.78 | 72.931  | 9579  | 3 | 489.60  | 19.72  |
| [P37412]LEU3_SALTY 3-isopropylmalate dehydrogenase | 6  |                                             | GAAAVSTDEMGDIAR                     | 341 | 16 | 3  | 17.18  | b14y8y12                                   | 1576.79 | 82.738  | 3696  | 3 | 526.27  | 13.94  |
| [P37412]LEU3_SALTY 3-isopropylmalate dehydrogenase | 7  | Carbamidomethyl+C(6)                        | ATVEGCEQADAILFGSVGGPK               | 59  | 21 | 4  | 22.34  | b5°b5b6y13                                 | 2106.00 | 51.343  | 2408  | 4 | 527.26  | -6.84  |
| [P37412]LEU3_SALTY 3-isopropylmalate dehydrogenase | 8  |                                             | ELTGGIYFGQPK                        | 138 | 12 | 4  | 22.3   | b7b9y6°y6                                  | 1309.67 | 47.470  | 1966  | 2 | 655.34  | -6.52  |
| [P37412]LEU3_SALTY 3-isopropylmalate dehydrogenase | 9  |                                             | YSLDANDAATAIEQAINR                  | 310 | 18 | 7  | 40.72  | b3b4b5b12°b12y13°y13                       | 1935.96 | 85.119  | 1784  | 3 | 645.99  | 9.96   |
| [P37412]LEU3_SALTY 3-isopropylmalate dehydrogenase | 10 | Carbamidomethyl+C(9); Carbamidomethyl+C(24) | LYQGLEAFCLRADIAANGFDILCVR           | 112 | 26 | 5  | 22.82  | y9°y9y10*y10y13                            | 2982.45 | 71.524  | 2739  | 4 | 746.37  | -14.00 |
| [P37412]LEU3_SALTY 3-isopropylmalate dehydrogenase | 11 |                                             | AFDTEVYHRFEIER                      | 160 | 14 | 3  | 19.31  | b4y5y7                                     | 1811.87 | 72.224  | 2712  | 2 | 906.44  | 1.08   |
| [P37412]LEU3_SALTY 3-isopropylmalate dehydrogenase | 12 |                                             | WENLPPEQPPEGALLPLR                  | 80  | 19 | 4  | 24.13  | b8b9°b9b11                                 | 2202.14 | 80.005  | 2565  | 3 | 734.72  | -12.97 |
| [P37412]LEU3_SALTY 3-isopropylmalate dehydrogenase | 13 | Oxidation+M(10)                             | GAAAVSTDEMGDIAR                     | 341 | 16 | 5  | 42.7   | b9y9y12y13y14                              | 1592.75 | 80.038  | 30837 | 2 | 796.88  | -2.76  |
| [P55900]SERC_SALTY Phohoserine aminotransferase    | 1  | Carbamidomethyl+C(7)                        | LAQQELCDWHGLGTSVMEISHR              | 20  | 22 | 16 | 106.28 | b1b8b10b12°b12y1y3y4y5°y5y8y9y10y11y12°y12 | 2567.18 | 74.810  | 46465 | 4 | 642.55  | -13.88 |
| [P55900]SERC_SALTY Phohoserine aminotransferase    | 2  |                                             | AQVFNFSSGPAMLPAEVLK                 | 1   | 19 | 10 | 47.89  | b2°b2b3b6b14y3y5y6y14y19                   | 2006.06 | 92.181  | 27201 | 2 | 1003.53 | 7.79   |
| [P55900]SERC_SALTY Phohoserine aminotransferase    | 3  |                                             | ASIYNAMPIEGVK                       | 335 | 13 | 4  | 35.14  | y8y9y10y13                                 | 1392.72 | 65.554  | 23574 | 2 | 696.86  | 2.02   |
| [P55900]SERC_SALTY Phohoserine aminotransferase    | 4  |                                             | GKEFIQVAEEAEQDFR                    | 42  | 16 | 7  | 37.4   | b2b13y5*y5y6y7y16                          | 1895.93 | 53.142  | 23153 | 3 | 632.65  | 11.01  |
| [P55900]SERC_SALTY Phohoserine aminotransferase    | 5  |                                             | ALTDFMIDFER                         | 348 | 11 | 5  | 35.34  | b2b5b8y3y6                                 | 1357.64 | 91.209  | 12108 | 2 | 679.32  | -3.78  |
| [P55900]SERC_SALTY Phohoserine aminotransferase    | 6  |                                             | VFLEESFAAGLHALK                     | 311 | 15 | 4  | 18.16  | b5°b5b10y3                                 | 1631.88 | 88.976  | 3517  | 3 | 544.63  | -0.15  |
| [P55900]SERC_SALTY Phohoserine aminotransferase    | 7  |                                             | EFIQVAEEAEQDFRDLLNIPSNYK            | 44  | 24 | 6  | 26.19  | b5°b5b11°b11y5y6                           | 2868.40 | 118.999 | 3076  | 3 | 956.80  | -2.55  |
| [P55900]SERC_SALTY Phohoserine aminotransferase    | 8  |                                             | TTADYVDAGYWAASAIK                   | 91  | 17 | 4  | 22.96  | b5b9y11y13                                 | 1802.87 | 83.883  | 2825  | 2 | 901.94  | 4.06   |
| [P55900]SERC_SALTY Phohoserine aminotransferase    | 9  |                                             | AQGGVAAMHK                          | 257 | 10 | 3  | 33.93  | y3y7y8                                     | 969.48  | 95.427  | 1858  | 2 | 485.24  | -14.73 |
| [P55900]SERC_SALTY Phohoserine aminotransferase    | 10 | Carbamidomethyl+C(3)                        | KYCAPQIIDAK                         | 111 | 11 | 5  | 41.54  | b7b8b9y10*y10                              | 1306.67 | 67.611  | 76511 | 2 | 653.84  | -7.47  |
| [P55900]SERC_SALTY Phohoserine aminotransferase    | 11 |                                             | MNVVPQLADNTLDKVFLEESFAAGLHALK       | 297 | 29 | 5  | 24.26  | b3y4y12y14y26                              | 3218.63 | 109.323 | 34358 | 4 | 805.41  | -6.52  |
| [P55900]SERC_SALTY Phohoserine aminotransferase    | 12 |                                             | AELLYGVIDNSDFYRNDVAQANR             | 272 | 23 | 11 | 55.24  | b3b5b12°b12y10y13°y13*y13y14y19y20         | 2643.30 | 80.005  | 20390 | 3 | 881.77  | 6.56   |
| [P55900]SERC_SALTY Phohoserine aminotransferase    | 13 |                                             | GQFAGVPLNLLGDKTTADYVDA<br>GYWAASAIK | 77  | 31 | 6  | 25.24  | b3b4b6°b6b25y25                            | 3212.65 | 97.863  | 19394 | 3 | 1071.56 | 8.89   |
| [P55900]SERC_SALTY Phohoserine aminotransferase    | 14 |                                             | ASIYNAMPIEGVKALTDFMIDFER            | 335 | 24 | 5  | 23.45  | b3b11b12°b12y14                            | 2731.35 | 90.772  | 5253  | 3 | 911.12  | 1.07   |
| [P55900]SERC_SALTY Phohoserine aminotransferase    | 15 | Carbamidomethyl+C(14)                       | DLLNIPSNYKVLFCGGGR                  | 58  | 19 | 5  | 14.96  | b3y3y13°y13*y13                            | 2160.12 | 100.730 | 3761  | 4 | 540.79  | 9.49   |
| [P55900]SERC_SALTY Phohoserine aminotransferase    | 16 |                                             | SRMNVVPQLADNTLDK                    | 295 | 16 | 4  | 35.11  | b8b10b11b13                                | 1848.94 | 92.296  | 2682  | 4 | 462.99  | 6.87   |
| [P55900]SERC_SALTY Phohoserine aminotransferase    | 17 |                                             | ALTDFMIDFERR                        | 348 | 12 | 5  | 26.28  | b6°b6y6°y6y7                               | 1513.74 | 60.919  | 2342  | 2 | 757.37  | -6.21  |

|                                                                                |    |                                         |                                                     |     |    |    |       |                                      |         |         |        |   |         |        |
|--------------------------------------------------------------------------------|----|-----------------------------------------|-----------------------------------------------------|-----|----|----|-------|--------------------------------------|---------|---------|--------|---|---------|--------|
| [P55900]SERC_SALTY Phohoserine aminotransferase                                | 18 |                                         | INQKKAELLYGVIDNSDFYR                                | 267 | 20 | 3  | 22.52 | b3b4y8                               | 2386.19 | 115.053 | 1784   | 3 | 796.07  | -5.93  |
| [P55900]SERC_SALTY Phohoserine aminotransferase                                | 19 | Carbamidomethyl+C(7); Oxidation+M(17)   | LAQQELCDWHGLGTSVMEISHR                              | 20  | 22 | 3  | 13.45 | b7b14y11                             | 2583.18 | 92.342  | 4350   | 4 | 646.55  | -9.07  |
| [P55900]SERC_SALTY Phohoserine aminotransferase                                | 20 | Oxidation+M(1)                          | MNVPFQLADNTLDK                                      | 297 | 14 | 4  | 19.31 | b4y5y8*y8                            | 1621.77 | 69.370  | 2444   | 4 | 406.20  | -13.92 |
| [P69936]YDFG_SALTY NADP-dependent L-serine/L-allo-threonine dehydrogenase ydfG | 1  |                                         | AAIEEMMASLPAQWR                                     | 58  | 15 | 11 | 52.42 | b4b6°b6b8b13°b13y2y5y9°y9y15         | 1703.83 | 91.301  | 10637  | 2 | 852.42  | 6.09   |
| [P69936]YDFG_SALTY NADP-dependent L-serine/L-allo-threonine dehydrogenase ydfG | 2  |                                         | TYENTTALTPEDITEAVWWVATLPAHVNINTVEMMPVTQSFAGLSVHR    | 199 | 48 | 6  | 21.78 | b2b14b24b25y14y48                    | 5340.63 | 136.532 | 4955   | 4 | 1335.91 | -1.01  |
| [P69936]YDFG_SALTY NADP-dependent L-serine/L-allo-threonine dehydrogenase ydfG | 3  |                                         | VTDIEPGLVGGTEFSSVR                                  | 171 | 18 | 5  | 47.38 | y5y7y8y9y13                          | 1862.96 | 69.964  | 27563  | 2 | 931.98  | 6.03   |
| [P69936]YDFG_SALTY NADP-dependent L-serine/L-allo-threonine dehydrogenase ydfG | 4  |                                         | ASVEDWETMIDTNNK                                     | 93  | 15 | 6  | 25.83 | b5°b5b8y8°y8y11                      | 1752.81 | 72.859  | 12036  | 2 | 876.91  | 17.55  |
| [P69936]YDFG_SALTY NADP-dependent L-serine/L-allo-threonine dehydrogenase ydfG | 5  |                                         | LQALK                                               | 36  | 5  | 1  | 13.23 | b3                                   | 572.37  | 56.622  | 4418   | 1 | 572.37  | -3.09  |
| [P69936]YDFG_SALTY NADP-dependent L-serine/L-allo-threonine dehydrogenase ydfG | 6  |                                         | AGKTYENTTALTPEDITEAVWWVATLPAHVNINTVEMMPVTQSFAGLSVHR | 196 | 51 | 5  | 11.66 | b11°b11b18y10*y10                    | 5596.79 | 102.299 | 10079  | 5 | 1120.16 | 0.17   |
| [P69936]YDFG_SALTY NADP-dependent L-serine/L-allo-threonine dehydrogenase ydfG | 7  |                                         | NRGHIINIGSTAGSWPYAGGNVYGATK                         | 124 | 27 | 4  | 25.91 | y9y12y14y23                          | 2761.39 | 100.770 | 7022   | 3 | 921.14  | 4.51   |
| [P69936]YDFG_SALTY NADP-dependent L-serine/L-allo-threonine dehydrogenase ydfG | 8  | Carbamidomethyl+C(15);Phosphoryl STY(6) | MIVLVTGATAGFGECIAR                                  | 0   | 18 | 3  | 15.6  | b7y6y12                              | 1945.94 | 96.620  | 1782   | 2 | 973.48  | 13.05  |
| [P69936]YDFG_SALTY NADP-dependent L-serine/L-allo-threonine dehydrogenase ydfG | 9  | Oxidation+M(9)                          | ASVEDWETMIDTNNK                                     | 93  | 15 | 4  | 18.16 | b4y3y8*y8                            | 1768.76 | 36.861  | 3849   | 4 | 442.95  | -4.69  |
| [P69936]YDFG_SALTY NADP-dependent L-serine/L-allo-threonine dehydrogenase ydfG | 10 |                                         | TYENTTALTPEDITEAVWWVATLPAH                          | 199 | 26 | 2  | 27.57 | y8y9                                 | 2929.39 | 136.539 | 4015   | 3 | 977.14  | -10.75 |
| [P58661]AAT_SALTY Aartate aminotransferase                                     | 1  |                                         | LREEFGVYAVASGR                                      | 360 | 14 | 8  | 39.08 | b10°b10b12b14y3y4y11y14              | 1553.79 | 72.192  | 23576  | 2 | 777.40  | -11.31 |
| [P58661]AAT_SALTY Aartate aminotransferase                                     | 2  |                                         | MFENITAAPADPILGLADLFR                               | 0   | 21 | 15 | 47.93 | b2b5°b5°b5b6°b6b8°b8y1y2y3y5y7y13y21 | 2275.20 | 121.298 | 17489  | 2 | 1138.10 | 10.19  |
| [P58661]AAT_SALTY Aartate aminotransferase                                     | 3  |                                         | VWVSNPSWPNHK                                        | 122 | 12 | 3  | 22.3  | b6b8y4                               | 1450.71 | 54.190  | 11525  | 3 | 484.24  | -11.70 |
| [P58661]AAT_SALTY Aartate aminotransferase                                     | 4  |                                         | NYLGIDGIPEFAR                                       | 63  | 13 | 10 | 54.62 | b2b4°b4b5b8°b8b12y5y8y13             | 1464.75 | 81.553  | 11152  | 2 | 732.88  | -0.08  |
| [P58661]AAT_SALTY Aartate aminotransferase                                     | 5  |                                         | ELIVASSYSK                                          | 236 | 10 | 5  | 36.94 | b2y6y7y8°y8                          | 1096.58 | 47.316  | 10183  | 2 | 548.79  | -10.13 |
| [P58661]AAT_SALTY Aartate aminotransferase                                     | 6  |                                         | TAQTPGGTGALR                                        | 96  | 12 | 7  | 68.41 | b4b5y7y8y9y10*y10                    | 1129.59 | 30.335  | 13144  | 2 | 565.30  | -4.75  |
| [P58661]AAT_SALTY Aartate aminotransferase                                     | 7  |                                         | NFGLYNER                                            | 246 | 8  | 5  | 36.13 | b3b7y6°y6*y6                         | 1012.48 | 51.319  | 5172   | 2 | 506.74  | -7.11  |
| [P58661]AAT_SALTY Aartate aminotransferase                                     | 8  | Carbamidomethyl+C(4)                    | VGACTLVADAETVDR                                     | 254 | 16 | 7  | 52.82 | b3b4b9b10°b10y6y12                   | 1647.81 | 55.569  | 4616   | 2 | 824.41  | 6.30   |
| [P58661]AAT_SALTY Aartate aminotransferase                                     | 9  |                                         | GWLPLFDFAYQGFR                                      | 204 | 15 | 6  | 37.14 | b3b7y3y5y7*y7                        | 1787.88 | 33.511  | 2148   | 4 | 447.73  | -6.14  |
| [P58661]AAT_SALTY Aartate aminotransferase                                     | 10 | Carbamidomethyl+C(15)                   | VNVAGMTPDNMAPLCEAIVAVL                              | 374 | 22 | 3  | 13.45 | b8y8y10                              | 2285.17 | 109.692 | 2083   | 3 | 762.39  | 15.28  |
| [P58661]AAT_SALTY Aartate aminotransferase                                     | 11 | Carbamidomethyl+C(1)                    | CTQELLFGKGSALINDK                                   | 76  | 17 | 3  | 24.99 | b7b8b12                              | 1893.95 | 98.401  | 103557 | 3 | 631.99  | -12.50 |

|                                           |    |                                          |                                                   |     |    |    |       |                                                   |         |         |       |   |         |        |
|-------------------------------------------|----|------------------------------------------|---------------------------------------------------|-----|----|----|-------|---------------------------------------------------|---------|---------|-------|---|---------|--------|
| P58661 AAT_SALTY Aartate aminotransferase | 12 |                                          | TAQTPGGTGALRIAADFLAK                              | 96  | 20 | 4  | 21.18 | b6*b6b9b16                                        | 1959.04 | 103.486 | 15396 | 2 | 980.02  | -13.02 |
| P58661 AAT_SALTY Aartate aminotransferase | 13 |                                          | AEQYLLNETTKNYLGIDGIPEFAR                          | 51  | 25 | 3  | 12.42 | b3b9y4                                            | 2884.47 | 63.811  | 7662  | 5 | 577.70  | 12.19  |
| P58661 AAT_SALTY Aartate aminotransferase | 14 |                                          | AFSQMKSAIR                                        | 270 | 10 | 4  | 28.7  | b4°b4b5y3                                         | 1138.60 | 31.686  | 7342  | 2 | 569.80  | -1.82  |
| P58661 AAT_SALTY Aartate aminotransferase | 15 | Carbamidomethyl+C(4)                     | VGACTLVAADAETVDRAFSQMK                            | 254 | 22 | 3  | 13.45 | b16y7y12                                          | 2340.12 | 104.579 | 6640  | 3 | 780.71  | -6.26  |
| P58661 AAT_SALTY Aartate aminotransferase | 16 |                                          | AIWEQELTDMRQR                                     | 304 | 13 | 4  | 34.11 | b7y5y8y10                                         | 1675.82 | 84.103  | 1698  | 3 | 559.28  | -0.66  |
| P58661 AAT_SALTY Aartate aminotransferase | 17 |                                          | KAEQYLLNETTK                                      | 50  | 13 | 3  | 20.67 | b6y5y7                                            | 1566.79 | 63.906  | 1551  | 3 | 522.93  | -8.26  |
| P58661 AAT_SALTY Aartate aminotransferase | 18 |                                          | VWVSNPSWPNH                                       | 122 | 11 | 0  | 2.82  |                                                   | 1322.63 | 54.189  | 13282 | 3 | 441.55  | 2.58   |
| P58661 AAT_SALTY Aartate aminotransferase | 19 |                                          | NYLGIDGIPEFAR                                     | 63  | 13 | 0  | 3.23  |                                                   | 1447.72 | 81.574  | 1591  | 2 | 724.36  | 2.53   |
| P77983 KPYK1_SALTY Pyruvate kinase I      | 1  |                                          | GDLGVEIPVEEVIFAQK                                 | 244 | 17 | 6  | 34.05 | b3b6b7y3y10y17                                    | 1843.00 | 95.550  | 27286 | 2 | 922.00  | 8.08   |
| P77983 KPYK1_SALTY Pyruvate kinase I      | 2  |                                          | MLDAGMNVMR                                        | 22  | 10 | 9  | 43.18 | b2b4°b4y1y2y7y8y9y10                              | 1137.52 | 57.986  | 21918 | 2 | 569.26  | -2.47  |
| P77983 KPYK1_SALTY Pyruvate kinase I      | 3  |                                          | AGQTFTFTTDK                                       | 86  | 11 | 3  | 24.33 | b10y6y10                                          | 1216.57 | 59.190  | 13800 | 3 | 406.19  | -12.44 |
| P77983 KPYK1_SALTY Pyruvate kinase I      | 4  |                                          | IENQEGLNNFDEILEASDGIMVAR                          | 220 | 24 | 8  | 47.04 | y2y3y4y6y8y10y13y24                               | 2677.29 | 97.201  | 13767 | 3 | 893.10  | 6.20   |
| P77983 KPYK1_SALTY Pyruvate kinase I      | 5  |                                          | AHGGENIQISK                                       | 208 | 12 | 6  | 26.28 | b2b6b7b8°y2y4                                     | 1266.68 | 40.226  | 6761  | 2 | 633.84  | -2.02  |
| P77983 KPYK1_SALTY Pyruvate kinase I      | 6  |                                          | AEAGDVANAILDGTDAVMLSGESAK                         | 292 | 25 | 6  | 22.77 | b4b8b15y2y9y24                                    | 2405.17 | 118.976 | 1643  | 3 | 802.40  | 9.64   |
| P77983 KPYK1_SALTY Pyruvate kinase I      | 7  | Carbamidomethyl+C(13)                    | YPLEAVSIMATICER                                   | 319 | 15 | 4  | 26.24 | y5°y5y6y14                                        | 1752.87 | 83.469  | 14311 | 2 | 876.94  | 4.87   |
| P77983 KPYK1_SALTY Pyruvate kinase I      | 8  |                                          | GAVETAEK                                          | 360 | 8  | 5  | 36.13 | b3b6°b6y3°y3                                      | 804.42  | 68.567  | 6075  | 1 | 804.42  | 14.34  |
| P77983 KPYK1_SALTY Pyruvate kinase I      | 9  |                                          | VVITATQMLDSMIK                                    | 272 | 14 | 5  | 27.61 | b8°b8b10y5y13                                     | 1549.83 | 102.303 | 4950  | 2 | 775.42  | -0.39  |
| P77983 KPYK1_SALTY Pyruvate kinase I      | 10 |                                          | AEAGDVANAILDGTDAVMLSGESAKGK                       | 292 | 27 | 5  | 22.77 | b4°b4b12b13°b13                                   | 2590.24 | 51.388  | 61960 | 3 | 864.09  | -9.52  |
| P77983 KPYK1_SALTY Pyruvate kinase I      | 11 |                                          | TESEEMLSKMLDAGMNVMR                               | 13  | 19 | 12 | 50.11 | b10b11°b11b13°b13y6y9°y9°y9y10°y10y12             | 2171.99 | 83.871  | 56115 | 3 | 724.67  | 3.71   |
| P77983 KPYK1_SALTY Pyruvate kinase I      | 12 |                                          | DVALQSGLAQKGDVVVMVSGALVPSGTTNTASVHVL              | 434 | 36 | 3  | 10.9  | b23y19y23                                         | 3520.83 | 86.552  | 11041 | 3 | 1174.28 | -12.07 |
| P77983 KPYK1_SALTY Pyruvate kinase I      | 13 |                                          | KYFPDATILALTTNEVTAR                               | 388 | 19 | 3  | 14.96 | b5y3y10                                           | 2124.11 | 83.424  | 10477 | 3 | 708.71  | -9.77  |
| P77983 KPYK1_SALTY Pyruvate kinase I      | 14 | Carbamidomethyl+C(3)                     | IVCTIGPKTESEEMLSK                                 | 5   | 17 | 5  | 24.99 | y6°y6y7°y7y10                                     | 1921.96 | 67.652  | 1909  | 3 | 641.33  | 0.83   |
| P77983 KPYK1_SALTY Pyruvate kinase I      | 15 | Carbamidomethyl+C(13)<br>;Oxidation+M(9) | YPLEAVSIMATICER                                   | 319 | 15 | 6  | 43.16 | b6°b6b7y4y5y7                                     | 1768.89 | 101.415 | 5273  | 2 | 884.95  | 13.73  |
| Q8ZQ40 WRBA_SALTY Flavoprotein wrbA       | 1  |                                          | LGSVFSSTGTGGGQEQTITSTWTTLAHHGMVIVPIGYAAQELFDVSQVR | 106 | 49 | 19 | 69.2  | b3°b3b7b11°b11b33y1y2y3y4°y4°y4y5y6°y6y7y12y29y49 | 5134.56 | 116.999 | 28964 | 4 | 1284.40 | 0.38   |
| Q8ZQ40 WRBA_SALTY Flavoprotein wrbA       | 2  |                                          | TQNAPVATPQELADYDAIIFGTPTR                         | 54  | 25 | 8  | 50.32 | b2b11b12y5y6y7y13y25                              | 2689.35 | 90.757  | 14488 | 3 | 897.12  | 2.63   |
| Q8ZQ40 WRBA_SALTY Flavoprotein wrbA       | 3  |                                          | GGTPYGATTIAGGDGSR                                 | 155 | 17 | 3  | 16.34 | b6y4y12                                           | 1537.73 | 41.571  | 3241  | 2 | 769.37  | 4.45   |
| Q8ZQ40 WRBA_SALTY Flavoprotein wrbA       | 4  |                                          | TFLDQTGGLWASGSLYGK                                | 88  | 18 | 4  | 24.52 | b5b11b12°b12                                      | 1900.93 | 118.603 | 2050  | 2 | 950.97  | -5.46  |
| Q8ZQ40 WRBA_SALTY Flavoprotein wrbA       | 5  |                                          | VPETMPPEIFAK                                      | 38  | 12 | 5  | 37.3  | b3b7°b7b10y8                                      | 1358.71 | 47.406  | 7908  | 2 | 679.86  | 8.45   |

|                                                |    |                       |                                         |     |    |    |        |                                                                        |         |         |       |   |         |        |
|------------------------------------------------|----|-----------------------|-----------------------------------------|-----|----|----|--------|------------------------------------------------------------------------|---------|---------|-------|---|---------|--------|
| Q8ZQ40 WRBA_SALTY Flavoprotein wrbA            | 6  |                       | YQGEYVAGLAVK                            | 183 | 12 | 5  | 34.29  | b3b4*b4b8y10                                                           | 1297.68 | 46.951  | 2225  | 2 | 649.34  | -1.88  |
| Q8ZQ40 WRBA_SALTY Flavoprotein wrbA            | 7  |                       | TQNAPVATPQELADYDAIIFGTPT<br>RFGNMSGQMR  | 54  | 34 | 5  | 21.53  | b8*b8b9b11y21                                                          | 3697.83 | 122.791 | 18337 | 4 | 925.21  | 13.93  |
| Q8ZQ40 WRBA_SALTY Flavoprotein wrbA            | 8  |                       | TPYGATTIAGDGSR                          | 157 | 15 | 7  | 64.01  | b5b6b7b8b10*b10b13                                                     | 1423.69 | 41.595  | 41544 | 3 | 475.24  | 7.46   |
| Q8ZQ40 WRBA_SALTY Flavoprotein wrbA            | 9  |                       | GGTPYGATTIAG                            | 155 | 12 | 1  | 7.28   | y10                                                                    | 1065.52 | 41.519  | 9629  | 2 | 533.26  | -3.09  |
| Q8ZQ40 WRBA_SALTY Flavoprotein wrbA            | 10 |                       | LGSVFSSTGTGGGQEQTITSTWTT<br>LA          | 106 | 26 | 4  | 16.84  | y6y8°y8y13                                                             | 2587.25 | 116.993 | 5514  | 3 | 863.09  | -2.17  |
| Q8ZK81 RS18_SALTY 30S ribosomal protein S18    | 1  |                       | YLSLLPYTDR                              | 63  | 10 | 8  | 58.17  | b2b3y1y5y6y7y8y10                                                      | 1240.65 | 75.726  | 58637 | 2 | 620.83  | -4.03  |
| Q8ZK81 RS18_SALTY 30S ribosomal protein S18    | 2  |                       | FTAEGVQEIDYKDIATLK                      | 12  | 18 | 4  | 15.6   | b3b6°b6y10                                                             | 2041.06 | 75.278  | 1833  | 3 | 681.02  | 3.83   |
| Q8ZK81 RS18_SALTY 30S ribosomal protein S18    | 3  |                       | NYITESGK                                | 30  | 8  | 5  | 36.13  | b4°b4*b4y4y7                                                           | 911.45  | 74.134  | 1947  | 1 | 911.45  | 7.37   |
| Q8ZK81 RS18_SALTY 30S ribosomal protein S18    | 4  |                       | FTAEGVQEIDYK                            | 12  | 12 | 7  | 62.21  | b3b4b10y5y6y7*y7                                                       | 1399.67 | 46.096  | 1624  | 2 | 700.34  | 0.44   |
| Q8ZK81 RS18_SALTY 30S ribosomal protein S18    | 5  |                       | DIATLKNYITESGK                          | 24  | 14 | 4  | 31.57  | b11y4y8y12                                                             | 1552.81 | 72.551  | 5420  | 3 | 518.28  | -5.11  |
| Q8ZK81 RS18_SALTY 30S ribosomal protein S18    | 6  | Carbamidomethyl+C(2)  | FCRFTAEGVQEIDYK                         | 9   | 15 | 3  | 18.16  | b9y4y7                                                                 | 1862.90 | 49.538  | 4902  | 3 | 621.64  | 14.35  |
| P66692 RPIA_SALTY Ribose-5-phohate isomerase A | 1  |                       | AVGWAALQYVQPGTIVGVGTGST<br>AAHFIDALGTMK | 8   | 35 | 24 | 205.26 | b3b4b5b6b7b9b10b11y3y4<br>y6y7y9y11°y11y14y19y20y<br>24y26y27y28y30y35 | 3487.82 | 108.271 | 66392 | 3 | 1163.28 | 3.57   |
| P66692 RPIA_SALTY Ribose-5-phohate isomerase A | 2  | Carbamidomethyl+C(3)  | FICIADASK                               | 112 | 9  | 8  | 74.98  | b2b8y3y4y5y6y7y9                                                       | 1024.51 | 51.745  | 40807 | 2 | 512.76  | -6.08  |
| P66692 RPIA_SALTY Ribose-5-phohate isomerase A | 3  |                       | GADVALIGTPDGVK                          | 201 | 14 | 5  | 19.31  | b4b6y2y5y14                                                            | 1312.71 | 58.099  | 21205 | 2 | 656.86  | -1.49  |
| P66692 RPIA_SALTY Ribose-5-phohate isomerase A | 4  |                       | GQIEGAVSSSDASTEK                        | 43  | 16 | 6  | 27.7   | b11y2y7y9y12y16                                                        | 1565.74 | 32.497  | 9087  | 2 | 783.37  | 7.80   |
| P66692 RPIA_SALTY Ribose-5-phohate isomerase A | 5  |                       | FPLPVEVIPMAR                            | 128 | 12 | 4  | 44.96  | y3y5y8y9                                                               | 1368.75 | 91.629  | 9164  | 2 | 684.88  | -13.20 |
| P66692 RPIA_SALTY Ribose-5-phohate isomerase A | 6  |                       | QVDILGKFPLPVEVIPMAR                     | 121 | 19 | 5  | 41.17  | y3y4y6y7°y7                                                            | 2122.19 | 100.714 | 40269 | 3 | 708.07  | -7.59  |
| P66955 TALB_SALTY Transaldolase B              | 1  |                       | LSYDTEASIAK                             | 100 | 11 | 8  | 64.02  | b3b8y3y7°y7y8y9y11                                                     | 1197.60 | 45.044  | 19099 | 2 | 599.30  | 0.20   |
| P66955 TALB_SALTY Transaldolase B              | 2  | Carbamidomethyl+C(11) | NVGEILELAGCDR                           | 228 | 13 | 4  | 34.11  | b3y5y8y11                                                              | 1445.71 | 74.690  | 15086 | 2 | 723.36  | 5.24   |
| P66955 TALB_SALTY Transaldolase B              | 3  |                       | ELAESEGAIER                             | 250 | 11 | 9  | 71.01  | b3y2y3°y3y4y7y8y9y11                                                   | 1203.59 | 37.345  | 14201 | 2 | 602.30  | 5.88   |
| P66955 TALB_SALTY Transaldolase B              | 4  |                       | ISTEVDAR                                | 92  | 8  | 7  | 49.36  | b7b8y2y4y6y7y8                                                         | 890.45  | 28.911  | 13348 | 2 | 445.73  | -10.83 |
| P66955 TALB_SALTY Transaldolase B              | 5  |                       | LYQPQDATTNPSLILNAAQIPEYR                | 25  | 24 | 9  | 51.04  | b4*b4b5b10b11b12y1y3y2<br>4                                            | 2716.39 | 96.707  | 6368  | 3 | 906.13  | -2.88  |
| P66955 TALB_SALTY Transaldolase B              | 6  |                       | QHGYETVVMGASFR                          | 214 | 14 | 3  | 27.09  | y3y4y9                                                                 | 1581.77 | 56.643  | 5367  | 2 | 791.39  | 11.34  |
| P66955 TALB_SALTY Transaldolase B              | 7  |                       | LASTWQGIR                               | 132 | 9  | 3  | 38.3   | y4y6y7                                                                 | 1031.55 | 52.635  | 18156 | 2 | 516.28  | -8.17  |
| P66955 TALB_SALTY Transaldolase B              | 8  |                       | LYNDAGISNDR                             | 117 | 11 | 5  | 47.56  | y3y4y5°y5y9                                                            | 1237.60 | 80.759  | 10115 | 3 | 413.20  | 11.94  |
| P66955 TALB_SALTY Transaldolase B              | 9  |                       | LIDDAVAWAK                              | 50  | 10 | 5  | 26.94  | b6°b6b9°b9y6                                                           | 1101.58 | 61.775  | 8897  | 2 | 551.29  | -14.96 |
| P66955 TALB_SALTY Transaldolase B              | 10 |                       | DYAPAEDPGVVSVTEIYEYYK                   | 193 | 21 | 6  | 21.72  | b3°b3b5b11y5°y5                                                        | 2408.11 | 93.221  | 7245  | 3 | 803.38  | -1.93  |
| P66955 TALB_SALTY Transaldolase B              | 11 |                       | ANTDK                                   | 187 | 5  | 1  | 13.23  | b4                                                                     | 548.27  | 74.794  | 2412  | 1 | 548.27  | 6.12   |

|                                                              |    |                      |                        |     |    |    |       |                              |         |         |       |   |         |        |
|--------------------------------------------------------------|----|----------------------|------------------------|-----|----|----|-------|------------------------------|---------|---------|-------|---|---------|--------|
| P66955 TALB_SALTY Transaldolase B                            | 12 |                      | ITEAEFLWQHHQDPMASVDK   | 275 | 19 | 4  | 23.68 | b6y5y8y10                    | 2295.11 | 47.416  | 2207  | 3 | 765.71  | 12.45  |
| P66955 TALB_SALTY Transaldolase B                            | 13 |                      | KFAVDQEK               | 300 | 8  | 4  | 33.12 | b5°b5b6y6                    | 964.52  | 55.629  | 8581  | 2 | 482.76  | 10.00  |
| P66955 TALB_SALTY Transaldolase B                            | 14 | Phosphoryl STY(5)    | ELAESEGAIERK           | 250 | 12 | 4  | 22.3  | b4y8°y8y11                   | 1411.64 | 51.377  | 5747  | 3 | 471.22  | 1.30   |
| P66955 TALB_SALTY Transaldolase B                            | 15 | Oxidation+M(15)      | QFTTVVADTGDIAAMK       | 9   | 16 | 4  | 24.3  | b4b13y8y10                   | 1683.83 | 75.472  | 1549  | 2 | 842.42  | 1.45   |
| P66955 TALB_SALTY Transaldolase B                            | 16 |                      | STEVDAR                | 93  | 7  | 1  | 9.67  | b4                           | 777.38  | 28.933  | 1716  | 1 | 777.38  | 5.02   |
| Q7CPG1 YICS_SALTY Uncharacterized protein yicS               | 1  |                      | IMASEGNQQHIR           | 59  | 12 | 8  | 73.76 | b2b9y3y5y7*y7y9y10           | 1383.67 | 27.300  | 18857 | 3 | 461.89  | -7.32  |
| Q7CPG1 YICS_SALTY Uncharacterized protein yicS               | 2  |                      | GALTDEAWEEK            | 48  | 11 | 5  | 24.33 | b4°b4b6y8y11                 | 1247.63 | 62.811  | 11983 | 2 | 624.32  | 4.31   |
| Q7CPG1 YICS_SALTY Uncharacterized protein yicS               | 3  |                      | GALTDEAWEK             | 48  | 10 | 4  | 54.94 | y3y4y7y9                     | 1119.54 | 50.385  | 9772  | 2 | 560.27  | 4.91   |
| Q7CPG1 YICS_SALTY Uncharacterized protein yicS               | 4  | Oxidation+M(2)       | IMASEGNQQHIR           | 59  | 12 | 3  | 22.3  | b5y8y10                      | 1399.68 | 40.802  | 7765  | 2 | 700.35  | 7.06   |
| P66643 RS9_SALTY 30S ribosomal protein S9                    | 1  |                      | GGGISGQAGAIR           | 68  | 12 | 5  | 40.31 | b3y7y8y9y12                  | 1043.55 | 34.116  | 23920 | 2 | 522.28  | -6.32  |
| P66643 RS9_SALTY 30S ribosomal protein S9                    | 2  |                      | SLEQYFGRETAR           | 33  | 12 | 5  | 34.29 | b3°b3b4b6y6                  | 1456.72 | 33.553  | 2395  | 2 | 728.86  | 1.42   |
| P66643 RS9_SALTY 30S ribosomal protein S9                    | 3  |                      | AENQYYGTGR             | 1   | 10 | 4  | 28.7  | b4°b4b5y5                    | 1158.54 | 27.648  | 28343 | 2 | 579.77  | 20.02  |
| P66643 RS9_SALTY 30S ribosomal protein S9                    | 4  |                      | ALMEYDESLR             | 85  | 10 | 3  | 26.94 | b8y3y8                       | 1226.57 | 41.066  | 5415  | 2 | 613.79  | -1.69  |
| P66643 RS9_SALTY 30S ribosomal protein S9                    | 5  |                      | QPLELVDMVEK            | 49  | 11 | 4  | 24.33 | b4*b4b7y8                    | 1300.71 | 27.812  | 4887  | 2 | 650.86  | 20.18  |
| P66643 RS9_SALTY 30S ribosomal protein S9                    | 6  |                      | ALMEYDESLRGELR         | 85  | 14 | 4  | 19.31 | b10°b10y11y13                | 1681.83 | 103.578 | 3464  | 3 | 561.28  | 3.12   |
| P62405 RL5_SALTY 50S ribosomal protein L5                    | 1  |                      | LLDNAAADLT AISGQKPLITK | 48  | 21 | 11 | 87.55 | b3b5y5y6y9y11y12y16y17y19y21 | 2153.21 | 76.097  | 40945 | 3 | 718.41  | -5.78  |
| P62405 RL5_SALTY 50S ribosomal protein L5                    | 2  |                      | LMTEFNYSVMQVPR         | 15  | 15 | 9  | 60.65 | b12b13°b13y2y7y8y11y12y15    | 1828.89 | 76.891  | 13885 | 2 | 914.95  | 10.08  |
| P62405 RL5_SALTY 50S ribosomal protein L5                    | 3  |                      | ITLNMGVGEAIADK         | 33  | 14 | 5  | 19.31 | b7b11y11°y11y14              | 1431.76 | 66.067  | 3123  | 2 | 716.38  | 7.84   |
| P62405 RL5_SALTY 50S ribosomal protein L5                    | 4  |                      | GNYSMGVREQIIFPEIDYDK   | 125 | 20 | 4  | 25.28 | b8y6y8y9                     | 2374.16 | 98.968  | 2257  | 2 | 1187.58 | 7.40   |
| P62405 RL5_SALTY 50S ribosomal protein L5                    | 5  |                      | EQIIFPEIDYDK           | 133 | 12 | 3  | 22.3  | b7y6y8                       | 1509.74 | 62.484  | 1634  | 3 | 503.92  | -6.39  |
| P62405 RL5_SALTY 50S ribosomal protein L5                    | 6  |                      | LHDYYK                 | 3   | 6  | 1  | 13.63 | b5                           | 838.40  | 106.633 | 1526  | 1 | 838.40  | -6.26  |
| P62405 RL5_SALTY 50S ribosomal protein L5                    | 7  | Carbamidomethyl+C(7) | QGYPIGCKVTLR           | 80  | 12 | 4  | 22.3  | b8y3y7°y7                    | 1391.76 | 33.398  | 2874  | 3 | 464.59  | 11.05  |
| P62405 RL5_SALTY 50S ribosomal protein L5                    | 8  |                      | GLDITITTTAKSDEEGR      | 150 | 17 | 3  | 16.34 | b5b12y9                      | 1806.91 | 39.732  | 1550  | 2 | 903.96  | -0.61  |
| P62405 RL5_SALTY 50S ribosomal protein L5                    | 9  | Phosphoryl STY(2)    | ITLNMGVGEAIADKK        | 33  | 15 | 3  | 18.16 | b13y12y14                    | 1639.80 | 67.665  | 16237 | 3 | 547.27  | -4.69  |
| P64267 GNS_SALTY Protein gns                                 | 1  |                      | TGQEVSEIEFAPR          | 28  | 13 | 5  | 39.34 | b4y8y9°y9y10                 | 1462.72 | 57.860  | 12322 | 2 | 731.86  | 2.17   |
| P64267 GNS_SALTY Protein gns                                 | 2  |                      | TGQEVSEIEFAPRETMK      | 28  | 17 | 5  | 16.34 | b1b3y3y6y17                  | 1951.95 | 46.097  | 7646  | 2 | 976.48  | 2.56   |
| P64267 GNS_SALTY Protein gns                                 | 3  |                      | AEEEEIALISK            | 9   | 11 | 3  | 36.09 | b3b5b9                       | 1173.61 | 83.869  | 3810  | 2 | 587.31  | -20.07 |
| P64267 GNS_SALTY Protein gns                                 | 4  |                      | ETMK                   | 41  | 4  | 1  | 12.83 | y3                           | 508.25  | 80.818  | 3579  | 1 | 508.25  | 14.23  |
| P64267 GNS_SALTY Protein gns                                 | 5  |                      | NSEELTHKAEIEEIALISK    | 1   | 19 | 3  | 21.91 | b8b11b13                     | 2112.07 | 75.302  | 11547 | 3 | 704.69  | -7.05  |
| P64267 GNS_SALTY Protein gns                                 | 6  |                      | TGQEVSEIEFAPRETMK      | 28  | 17 | 6  | 32.8  | b3b5°b5b13y6y11              | 1951.93 | 85.143  | 3328  | 3 | 651.32  | -5.19  |
| P64267 GNS_SALTY Protein gns                                 | 7  | Phosphoryl STY(6)    | TGQEVSEIEFAPRETMK      | 28  | 17 | 3  | 16.34 | b5y4y11                      | 2031.92 | 89.826  | 4063  | 3 | 677.98  | 7.81   |
| P0A1A5 ILVE_SALTY Branched-chain-amino-acid aminotransferase | 1  |                      | SVDGIQVGEGR            | 266 | 11 | 5  | 36.77 | b7y2y5y6y9                   | 1116.56 | 42.157  | 22151 | 2 | 558.79  | -0.33  |
| P0A1A5 ILVE_SALTY Branched-chain-amino-acid aminotransferase | 2  |                      | AAPNTIPTAAK            | 149 | 11 | 9  | 68.58 | y1y2y3y5y7°y7y8y9y11         | 1054.59 | 32.912  | 14834 | 2 | 527.80  | -1.27  |

|                                                                           |    |                       |                                   |     |    |   |       |                                                 |         |         |       |   |         |        |
|---------------------------------------------------------------------------|----|-----------------------|-----------------------------------|-----|----|---|-------|-------------------------------------------------|---------|---------|-------|---|---------|--------|
| [P0A1A5]ILVE_SALTY Branched-chain-amino-acid aminotransferase             | 3  |                       | IQQAFFGLFTGETEDK                  | 284 | 16 | 3 | 17.18 | b9y4y10                                         | 1830.89 | 76.885  | 11263 | 2 | 915.95  | -0.93  |
| [P0A1A5]ILVE_SALTY Branched-chain-amino-acid aminotransferase             | 4  |                       | DGVLFTPPFTSSALPGITR               | 204 | 19 | 3 | 14.96 | b6b9y14                                         | 1976.05 | 93.757  | 14096 | 2 | 988.53  | -0.99  |
| [P0A1A5]ILVE_SALTY Branched-chain-amino-acid aminotransferase             | 5  |                       | ADYIWFNGEMVR                      | 5   | 12 | 3 | 22.3  | b3b7y5                                          | 1500.70 | 69.376  | 5697  | 3 | 500.90  | 3.74   |
| [P0A1A5]ILVE_SALTY Branched-chain-amino-acid aminotransferase             | 6  |                       | WGWLDPVNS                         | 300 | 9  | 3 | 30.51 | b6b8y5                                          | 1073.50 | 68.077  | 3869  | 2 | 537.25  | -6.14  |
| [P0A1A5]ILVE_SALTY Branched-chain-amino-acid aminotransferase             | 7  |                       | ESLYLADEVFMSGTAAEITPVR            | 244 | 22 | 4 | 13.45 | b10b12y13°y13                                   | 2399.17 | 128.566 | 3172  | 3 | 800.40  | -3.77  |
| [P0A1A5]ILVE_SALTY Branched-chain-amino-acid aminotransferase             | 8  | Carbamidomethyl+C(14) | FPVSQSIDELMEACR                   | 69  | 15 | 4 | 29.48 | b6y7y10y11                                      | 1781.86 | 83.285  | 1930  | 3 | 594.62  | 19.80  |
| [P0A1A5]ILVE_SALTY Branched-chain-amino-acid aminotransferase             | 9  |                       | VHVMSHALHYGTSVFEGIR               | 22  | 19 | 5 | 33.39 | b5b8b10b11y15                                   | 2140.04 | 75.551  | 1689  | 4 | 535.77  | -14.72 |
| [P0A1A5]ILVE_SALTY Branched-chain-amino-acid aminotransferase             | 10 |                       | KADYIWFNGEMVR                     | 4   | 13 | 3 | 20.67 | b3y6y9                                          | 1628.80 | 72.385  | 3834  | 3 | 543.61  | 8.39   |
| [P0A1A5]ILVE_SALTY Branched-chain-amino-acid aminotransferase             | 11 | Phosphoryl STY(12)    | DGVLFTPPFTSSALPGITR               | 204 | 19 | 8 | 51.87 | b6°b6b11b13_HPO3<br>b13b15y9y13_H3PO4<br>y13y14 | 2055.98 | 94.511  | 2560  | 2 | 1028.50 | -10.09 |
| [Q7CPK0]UGPB_SALTY sn-glycerol-3-phohate-binding periplasmic protein ugpB | 1  |                       | TGYLPITTAAYELTR                   | 343 | 15 | 7 | 55.64 | b3y4y6y7y9y11y15                                | 1669.89 | 85.729  | 64699 | 2 | 835.45  | 3.36   |
| [Q7CPK0]UGPB_SALTY sn-glycerol-3-phohate-binding periplasmic protein ugpB | 2  |                       | LGNMPQIR                          | 389 | 8  | 6 | 49.36 | b6°b6y4y5y7*y7                                  | 928.50  | 48.366  | 37385 | 2 | 464.75  | -8.74  |
| [Q7CPK0]UGPB_SALTY sn-glycerol-3-phohate-binding periplasmic protein ugpB | 3  |                       | TIVDEELESVWTGKK                   | 397 | 15 | 8 | 55.64 | b5y3y4y8y11°y11y13y15                           | 1733.88 | 76.351  | 17273 | 3 | 578.63  | -9.15  |
| [Q7CPK0]UGPB_SALTY sn-glycerol-3-phohate-binding periplasmic protein ugpB | 4  |                       | FNYGVGMMPYDADIK                   | 282 | 15 | 5 | 31.85 | b2b4b5y7y11                                     | 1720.78 | 75.411  | 15363 | 2 | 860.90  | 7.66   |
| [Q7CPK0]UGPB_SALTY sn-glycerol-3-phohate-binding periplasmic protein ugpB | 5  |                       | FNQANPDYK                         | 47  | 9  | 6 | 38.3  | b2y2y3y4y8y9                                    | 1096.50 | 29.399  | 14527 | 2 | 548.76  | -1.00  |
| [Q7CPK0]UGPB_SALTY sn-glycerol-3-phohate-binding periplasmic protein ugpB | 6  |                       | GNYEQNLASAGIAFR                   | 62  | 15 | 7 | 55.42 | b7b10b11*b11b12b13y15                           | 1610.80 | 74.093  | 13647 | 2 | 805.90  | 6.29   |
| [Q7CPK0]UGPB_SALTY sn-glycerol-3-phohate-binding periplasmic protein ugpB | 7  |                       | TIVDEELESVWTGK                    | 397 | 14 | 5 | 27.88 | b5°b5b7b11°b11                                  | 1605.82 | 78.262  | 3171  | 2 | 803.41  | 12.47  |
| [Q7CPK0]UGPB_SALTY sn-glycerol-3-phohate-binding periplasmic protein ugpB | 8  |                       | GAPQNAIIGGASLWVMQGKDKET<br>YTGVAK | 297 | 29 | 4 | 21.95 | b14b15°b15y11                                   | 2990.51 | 105.519 | 3012  | 4 | 748.38  | -11.27 |
| [Q7CPK0]UGPB_SALTY sn-glycerol-3-phohate-binding periplasmic protein ugpB | 9  |                       | SGHLLSQPFNSSTPVLYYNK              | 132 | 20 | 3 | 14.39 | b3b7y3                                          | 2252.12 | 68.991  | 42334 | 3 | 751.38  | -8.56  |
| [Q7CPK0]UGPB_SALTY sn-glycerol-3-phohate-binding periplasmic protein ugpB | 10 | Carbamidomethyl+C(6)  | FYNGDCAMTTASSGSLANIR              | 258 | 20 | 4 | 21.18 | y4y11°y11y14                                    | 2135.97 | 61.909  | 11358 | 2 | 1068.49 | 8.34   |
| [Q7CPK0]UGPB_SALTY sn-glycerol-3-phohate-binding periplasmic protein ugpB | 11 |                       | DAGINFDESQFVPTVAGYYTDAK           | 109 | 23 | 5 | 29.51 | b5y3y6y8y11                                     | 2508.18 | 62.099  | 5431  | 3 | 836.73  | 7.88   |
| [Q7CPK0]UGPB_SALTY sn-glycerol-3-phohate-binding periplasmic protein ugpB | 12 |                       | NNGFDGTDAVLEFNKPEQVK              | 212 | 20 | 8 | 56.19 | y6y8°y8y9°y9y10y16y18                           | 2222.10 | 66.246  | 4615  | 2 | 1111.55 | 10.33  |
| [Q7CPK0]UGPB_SALTY sn-glycerol-3-phohate-binding periplasmic protein ugpB | 13 |                       | FLDFLAKPENAAEWHQK                 | 326 | 17 | 3 | 23.33 | b8b9y14                                         | 2044.03 | 82.406  | 2322  | 3 | 682.01  | -0.90  |

|                                                                          |    |                      |                           |     |    |    |        |                                             |         |         |       |   |         |        |
|--------------------------------------------------------------------------|----|----------------------|---------------------------|-----|----|----|--------|---------------------------------------------|---------|---------|-------|---|---------|--------|
| Q7CPK0 UGPB_SALTY sn-glycerol-3-phohate-binding periplasmic protein ugpB | 14 |                      | TWQELADYTAK               | 167 | 11 | 3  | 27.34  | b10y6y7                                     | 1325.66 | 61.819  | 1898  | 2 | 663.33  | 15.65  |
| Q7CPK0 UGPB_SALTY sn-glycerol-3-phohate-binding periplasmic protein ugpB | 15 |                      | AGLDPEQPPKTWQELADYTAK     | 157 | 21 | 5  | 29.8   | b4b7y4y5y17                                 | 2358.16 | 73.498  | 26194 | 3 | 786.73  | 1.14   |
| Q7CPK0 UGPB_SALTY sn-glycerol-3-phohate-binding periplasmic protein ugpB | 16 |                      | EQGYDKNPGADIATR           | 358 | 16 | 4  | 25.56  | y3y4y9*y9                                   | 1797.84 | 41.011  | 25655 | 3 | 599.95  | -1.29  |
| Q7CPK0 UGPB_SALTY sn-glycerol-3-phohate-binding periplasmic protein ugpB | 17 |                      | EVDSLAQRFNQANPDYK         | 39  | 17 | 9  | 52.65  | b5b10b12y6°y6y9°y9y12y13                    | 1994.95 | 94.557  | 10404 | 3 | 665.66  | -1.77  |
| Q7CPK0 UGPB_SALTY sn-glycerol-3-phohate-binding periplasmic protein ugpB | 18 |                      | ETYTGVAKFLDFLAKPENAAEWHQK | 318 | 25 | 3  | 12.42  | b4b11y10                                    | 2893.46 | 116.927 | 3032  | 3 | 965.16  | 2.28   |
| Q7CPK0 UGPB_SALTY sn-glycerol-3-phohate-binding periplasmic protein ugpB | 19 |                      | LGNMPQIRTIVDEELESVWTGK    | 389 | 22 | 3  | 23.33  | y10y12y13                                   | 2515.27 | 115.248 | 2178  | 3 | 839.10  | -6.21  |
| Q7CPK0 UGPB_SALTY sn-glycerol-3-phohate-binding periplasmic protein ugpB | 20 |                      | VDEELESVWTGKK             | 399 | 13 | 2  | 14.93  | b5b9                                        | 1519.77 | 76.357  | 3694  | 2 | 760.39  | 2.41   |
| P0A2E1 GLYA_SALTY Serine hydroxymethyltransferase                        | 1  |                      | LNSAVFPSAQGGPLMHVIAGK     | 251 | 21 | 8  | 21.72  | b2b4*b4y3y13y15°y15y21                      | 2094.11 | 79.047  | 70914 | 3 | 698.71  | -4.08  |
| P0A2E1 GLYA_SALTY Serine hydroxymethyltransferase                        | 2  |                      | VMQAQGSQLTNK              | 42  | 12 | 17 | 125.13 | b2b3b6*b6b10*b10y2*y2y3y4y5y6y7y9y10*y10y12 | 1304.66 | 30.537  | 46865 | 2 | 652.83  | -4.12  |
| P0A2E1 GLYA_SALTY Serine hydroxymethyltransferase                        | 3  |                      | SPFVTSGIR                 | 354 | 9  | 6  | 45.51  | b1b7y5y6y7y9                                | 963.52  | 49.613  | 45038 | 2 | 482.26  | -4.05  |
| P0A2E1 GLYA_SALTY Serine hydroxymethyltransferase                        | 4  |                      | EMNIADYDAELWQAMEQEK       | 4   | 19 | 9  | 58.02  | b3y4°y4y6y7y9y10y12y19                      | 2314.03 | 93.426  | 36563 | 2 | 1157.52 | 12.66  |
| P0A2E1 GLYA_SALTY Serine hydroxymethyltransferase                        | 5  | Carbamidomethyl+C(7) | ELAGWMCDVLDNINDEATIER     | 380 | 21 | 6  | 30.04  | y4y5y8y11°y11y21                            | 2464.15 | 102.104 | 28981 | 2 | 1232.58 | 14.86  |
| P0A2E1 GLYA_SALTY Serine hydroxymethyltransferase                        | 6  |                      | AVALKEAMEPEFK             | 272 | 13 | 3  | 20.67  | b3b11y3                                     | 1462.76 | 60.153  | 24309 | 2 | 731.88  | -0.83  |
| P0A2E1 GLYA_SALTY Serine hydroxymethyltransferase                        | 7  |                      | EAMEPEFK                  | 277 | 8  | 4  | 36.13  | b5y2y4y6                                    | 980.44  | 44.073  | 16933 | 2 | 490.72  | 1.31   |
| P0A2E1 GLYA_SALTY Serine hydroxymethyltransferase                        | 8  |                      | VVSGGTENHLFLDLVDK         | 308 | 18 | 5  | 24.52  | b6°b6b7°b7b13                               | 1956.04 | 74.687  | 90943 | 2 | 978.52  | -3.06  |
| P0A2E1 GLYA_SALTY Serine hydroxymethyltransferase                        | 9  |                      | FPVYA                     | 412 | 5  | 1  | 13.23  | b4                                          | 596.30  | 58.037  | 23953 | 1 | 596.30  | -7.98  |
| P0A2E1 GLYA_SALTY Serine hydroxymethyltransferase                        | 10 |                      | QEEHIELIASENYTSR          | 25  | 17 | 4  | 16.34  | b9b11y10*y10                                | 2016.01 | 81.040  | 3356  | 2 | 1008.51 | 20.95  |
| P0A2E1 GLYA_SALTY Serine hydroxymethyltransferase                        | 11 |                      | YAEGYPGK                  | 54  | 8  | 3  | 40.9   | y4y6y7                                      | 884.41  | 27.813  | 1832  | 2 | 442.71  | -1.86  |
| P0A2E1 GLYA_SALTY Serine hydroxymethyltransferase                        | 12 |                      | GYKVVSOGGTENHLFLDLVDK     | 305 | 21 | 3  | 13.89  | b10b12y11                                   | 2304.22 | 102.028 | 63979 | 2 | 1152.61 | -3.28  |
| P0A2E1 GLYA_SALTY Serine hydroxymethyltransferase                        | 13 |                      | EMNIADYDAELWQAMEQEKVR     | 4   | 21 | 4  | 23.54  | b5°b5b19b20                                 | 2569.14 | 75.233  | 56969 | 3 | 857.05  | -13.30 |
| P0A2E1 GLYA_SALTY Serine hydroxymethyltransferase                        | 14 |                      | LYNIVPYGIDESGKIDYDEMAK    | 138 | 22 | 4  | 26.95  | b3b13y17y18                                 | 2533.22 | 77.232  | 49498 | 3 | 845.08  | 2.12   |
| P0A2E1 GLYA_SALTY Serine hydroxymethyltransferase                        | 15 |                      | NSVPNDPKSPFVTSGIR         | 346 | 17 | 4  | 26.18  | b3y8y11y14                                  | 1814.92 | 52.894  | 21450 | 3 | 605.65  | -10.16 |
| P0A2E1 GLYA_SALTY Serine hydroxymethyltransferase                        | 16 |                      | AVALKEAMEPEFK             | 272 | 13 | 3  | 28.15  | y4y7y8                                      | 1462.76 | 56.574  | 8912  | 2 | 731.88  | -2.50  |
| P0A2E1 GLYA_SALTY Serine hydroxymethyltransferase                        | 17 |                      | MIIGGFSAYSGVVDWAKMR       | 168 | 19 | 3  | 24.13  | y6y9y10                                     | 2088.02 | 105.390 | 5901  | 2 | 1044.51 | -9.94  |
| P0A2E1 GLYA_SALTY Serine hydroxymethyltransferase                        | 18 |                      | NLTGKEADAALGR             | 326 | 13 | 3  | 29.91  | y3y6y9                                      | 1315.70 | 61.665  | 3744  | 2 | 658.35  | 1.48   |



|                                                                  |    |                                         |                                 |     |    |    |       |                            |         |         |        |   |         |        |
|------------------------------------------------------------------|----|-----------------------------------------|---------------------------------|-----|----|----|-------|----------------------------|---------|---------|--------|---|---------|--------|
| P0A2E1 GLYA_SALTY Serine hydroxymethyltransferase                | 19 |                                         | VRQEEHIELIASENYTSR              | 23  | 19 | 5  | 14.96 | b6°b6y6°y6y8               | 2271.11 | 77.893  | 2394   | 4 | 568.53  | -13.22 |
| P0A2E1 GLYA_SALTY Serine hydroxymethyltransferase                | 20 | Oxidation+M(15)                         | LNSAVFPSAQGGPLMHVIAGK           | 251 | 21 | 6  | 24.73 | b3°b3b4°b4b10y3            | 2110.09 | 85.387  | 46600  | 3 | 704.03  | -12.15 |
| P0A2E1 GLYA_SALTY Serine hydroxymethyltransferase                | 21 | Oxidation+M(3)                          | REMNIADYDAELWQAMEQEK            | 3   | 20 | 3  | 22.52 | b5y5y6                     | 2486.12 | 77.768  | 3391   | 4 | 622.29  | 10.90  |
| P0A2E1 GLYA_SALTY Serine hydroxymethyltransferase                | 22 | Oxidation+M(1)                          | MIIGGFSAYSQVVDWAK               | 168 | 17 | 7  | 51.18 | b14y8y9y11y12°y12y14       | 1816.88 | 83.903  | 1733   | 2 | 908.95  | -5.78  |
| P22107 TRAT_SALTY TraT complement resistance protein             | 1  |                                         | FEEAKPVLEEQLAK                  | 223 | 14 | 7  | 27.88 | b2y2y6*y6y9y13y14          | 1630.86 | 53.953  | 40945  | 3 | 544.29  | -7.78  |
| P22107 TRAT_SALTY TraT complement resistance protein             | 2  |                                         | ATVTTDNVAALR                    | 177 | 12 | 11 | 75.9  | b4b9y1y5y6y8°y8y9°y9y10y12 | 1231.66 | 46.245  | 33482  | 2 | 616.34  | -0.89  |
| P22107 TRAT_SALTY TraT complement resistance protein             | 3  |                                         | ESQGWLNR                        | 107 | 8  | 6  | 48.68 | y3y5*y5y7y8*y8             | 989.48  | 44.287  | 27727  | 2 | 495.24  | -3.95  |
| P22107 TRAT_SALTY TraT complement resistance protein             | 4  |                                         | GYTVVTSPDK                      | 79  | 10 | 5  | 36.94 | b2y5y6y7y10                | 1066.54 | 36.884  | 10307  | 2 | 533.78  | 1.49   |
| P22107 TRAT_SALTY TraT complement resistance protein             | 5  |                                         | IQTSTETGNQHK                    | 196 | 12 | 3  | 29.51 | y5y6y10                    | 1343.63 | 15.178  | 7062   | 3 | 448.55  | -17.17 |
| P22107 TRAT_SALTY TraT complement resistance protein             | 6  |                                         | ATVTTDNVAALRQGTSGAK             | 177 | 19 | 6  | 14.96 | b9°b9°b9y3y7*y7            | 1861.00 | 53.186  | 168152 | 3 | 621.01  | 14.37  |
| P22107 TRAT_SALTY TraT complement resistance protein             | 7  |                                         | DIQAKGYTVVTSPDK                 | 74  | 15 | 3  | 24.18 | b9b10y5                    | 1621.82 | 65.770  | 6265   | 2 | 811.41  | -13.17 |
| P22107 TRAT_SALTY TraT complement resistance protein             | 8  | Carbamidomethyl+C(16)<br>;Oxidation+M() | LMMVTLVSSTLALSGCGAMSTAI<br>KK   | 5   | 25 | 3  | 12.42 | b5b24y7                    | 2586.36 | 77.045  | 315909 | 3 | 862.79  | 8.31   |
| P22107 TRAT_SALTY TraT complement resistance protein             | 9  | Carbamidomethyl+C(16)<br>;Oxidation+M() | LMMVTLVSSTLALSGCGAMSTAI<br>K    | 5   | 24 | 3  | 22.02 | b3b4y12                    | 2458.23 | 77.244  | 4226   | 3 | 820.08  | -3.48  |
| P22107 TRAT_SALTY TraT complement resistance protein             | 10 |                                         | YTVVTSPDK                       | 80  | 9  | 2  | 20.7  | b4b8                       | 1009.53 | 36.932  | 1790   | 2 | 505.27  | 11.12  |
| P04787 LEUD1_SALTY 3-isopropylmalate dehydratase small subunit 1 | 1  |                                         | FTQHTGLVPLDAANVDTDAIIPK         | 4   | 24 | 7  | 16.89 | b9b21y2y3y10*y10y24        | 2535.34 | 81.529  | 28221  | 3 | 845.79  | -1.25  |
| P04787 LEUD1_SALTY 3-isopropylmalate dehydratase small subunit 1 | 2  |                                         | GQQPNPEFVLNFPEYQGASILLAR        | 53  | 24 | 5  | 12.28 | b2b13°y12y14y24            | 2688.38 | 99.066  | 12559  | 3 | 896.80  | -0.18  |
| P04787 LEUD1_SALTY 3-isopropylmalate dehydratase small subunit 1 | 3  |                                         | TGFGAHLFNDWR                    | 36  | 12 | 11 | 59.2  | b1b4°b4b5b7°b7y2y3y5y7y12  | 1420.66 | 73.433  | 12098  | 3 | 474.22  | -14.09 |
| P04787 LEUD1_SALTY 3-isopropylmalate dehydratase small subunit 1 | 4  |                                         | EHAPWALTDYGFK                   | 86  | 13 | 6  | 20.67 | b2°b2b3y10y12y13           | 1534.75 | 73.428  | 11723  | 2 | 767.88  | 8.91   |
| P04787 LEUD1_SALTY 3-isopropylmalate dehydratase small subunit 1 | 5  |                                         | QPAFMR                          | 195 | 6  | 1  | 13.63 | b5                         | 749.37  | 31.974  | 11762  | 1 | 749.37  | -4.64  |
| P04787 LEUD1_SALTY 3-isopropylmalate dehydratase small subunit 1 | 6  | Carbamidomethyl+C(3)                    | RHCMLNGLDSIGLTLQHEDAIAAY<br>ENK | 168 | 27 | 3  | 18    | b6b10b23                   | 3069.51 | 133.498 | 8981   | 3 | 1023.84 | 7.32   |
| P04787 LEUD1_SALTY 3-isopropylmalate dehydratase small subunit 1 | 7  |                                         | VTRTGFGAHLFNDWR                 | 33  | 15 | 5  | 26.24 | y3°y3y6y10°y10             | 1776.88 | 67.657  | 4571   | 3 | 592.96  | -9.48  |
| P04787 LEUD1_SALTY 3-isopropylmalate dehydratase small subunit 1 | 8  |                                         | TGFGAHLFNDWRFLDEK               | 36  | 17 | 5  | 23.74 | b4b10b12°b12°b12           | 2053.02 | 80.098  | 3584   | 2 | 1027.01 | 12.96  |
| Q9F7A2 NUDD_SALTY GDP-mannose mannosyl hydrolase                 | 1  |                                         | AYFSPDAPAVGL                    | 145 | 12 | 5  | 37.3  | b3b8b10y11°y11             | 1207.59 | 67.714  | 3071   | 2 | 604.30  | -10.21 |
| Q9F7A2 NUDD_SALTY GDP-mannose mannosyl hydrolase                 | 2  |                                         | DETLEAAFAR                      | 54  | 10 | 7  | 28.7  | b2b3b4b10y6°y6y10          | 1122.55 | 49.873  | 2565   | 2 | 561.78  | 5.55   |
| Q9F7A2 NUDD_SALTY GDP-mannose mannosyl hydrolase                 | 3  |                                         | WLTPEQLLASDNVHENS               | 127 | 18 | 5  | 15.6  | b1b7y4y6°y6                | 2109.04 | 71.359  | 2057   | 2 | 1055.02 | 3.13   |

|                                                    |    |  |                                     |     |    |   |       |                      |         |         |       |   |         |        |
|----------------------------------------------------|----|--|-------------------------------------|-----|----|---|-------|----------------------|---------|---------|-------|---|---------|--------|
| Q9F7A2 NUDD_SALTY GDP-mannose mannosyl hydrolase   | 4  |  | LPDAQHGSYR                          | 117 | 10 | 5 | 26.94 | b4°b4b6*b6y7         | 1143.54 | 75.271  | 10788 | 2 | 572.27  | -13.66 |
| Q8ZQM3 GSIB_SALTY Glutathione-binding protein gsiB | 1  |  | FQDGADFNAAAVK                       | 97  | 13 | 7 | 46.15 | y1y4y5y10y11*y11y13  | 1353.65 | 50.287  | 26485 | 2 | 677.33  | 1.62   |
| Q8ZQM3 GSIB_SALTY Glutathione-binding protein gsiB | 2  |  | YISMNVTQKPFDNPK                     | 269 | 15 | 8 | 40.72 | y4y5y6*y6y9*y9*y9y15 | 1781.86 | 56.315  | 24574 | 3 | 594.63  | -13.98 |
| Q8ZQM3 GSIB_SALTY Glutathione-binding protein gsiB | 3  |  | NLTGFWIMPDTGFSDDADLK                | 491 | 21 | 5 | 27.4  | b6b11y2y13y14        | 2390.13 | 107.540 | 22727 | 2 | 1195.57 | 11.54  |
| Q8ZQM3 GSIB_SALTY Glutathione-binding protein gsiB | 4  |  | DIGFHPVGTGPYQLETWNQTDFV<br>K        | 176 | 24 | 4 | 22.02 | b10y10y11y24         | 2749.34 | 83.962  | 22550 | 3 | 917.12  | 5.24   |
| Q8ZQM3 GSIB_SALTY Glutathione-binding protein gsiB | 5  |  | AAMLQTGEAQFAFPIPEQAALLA<br>K        | 229 | 25 | 4 | 22.9  | b6°b6b11b12          | 2679.40 | 97.872  | 9902  | 3 | 893.81  | 7.38   |
| Q8ZQM3 GSIB_SALTY Glutathione-binding protein gsiB | 6  |  | LDSITWRPVTDNNTNTR                   | 214 | 15 | 5 | 41.52 | y2y4y6y11y13         | 1787.91 | 57.506  | 5965  | 2 | 894.46  | 3.76   |
| Q8ZQM3 GSIB_SALTY Glutathione-binding protein gsiB | 7  |  | NLELVASPSIMQR                       | 256 | 13 | 4 | 29.71 | b8b12y4y7            | 1457.78 | 53.196  | 3195  | 3 | 486.60  | 0.08   |
| Q8ZQM3 GSIB_SALTY Glutathione-binding protein gsiB | 8  |  | SFYQGLFGLDKDMK                      | 56  | 14 | 4 | 27.09 | b2y4y7y8             | 1648.79 | 71.245  | 1947  | 3 | 550.27  | -10.66 |
| Q8ZQM3 GSIB_SALTY Glutathione-binding protein gsiB | 9  |  | EAQDIIWKESPWIPLVVEK                 | 465 | 19 | 5 | 21.91 | b5°b5b7b11y2         | 2280.20 | 93.092  | 1811  | 3 | 760.74  | -13.92 |
| Q8ZQM3 GSIB_SALTY Glutathione-binding protein gsiB | 10 |  | TEVVDPATVK                          | 134 | 10 | 4 | 26.94 | b4°b4b9y5            | 1058.57 | 39.754  | 18692 | 2 | 529.79  | -5.07  |
| Q8ZQM3 GSIB_SALTY Glutathione-binding protein gsiB | 11 |  | FAGYWQQGLPK                         | 203 | 11 | 3 | 24.33 | b6b10y9              | 1294.66 | 48.859  | 16337 | 2 | 647.83  | 2.45   |
| Q8ZQM3 GSIB_SALTY Glutathione-binding protein gsiB | 12 |  | MTQFITHK                            | 0   | 8  | 8 | 65.6  | b3b4b6°b6b7°b7*b7y5  | 1005.51 | 66.158  | 2744  | 2 | 503.26  | -5.46  |
| Q8ZQM3 GSIB_SALTY Glutathione-binding protein gsiB | 13 |  | EAGYPDGFSTTLWSSHNHSTAQK             | 339 | 23 | 3 | 13.06 | b8b10y13             | 2521.16 | 91.038  | 2515  | 4 | 631.04  | 7.36   |
| Q8ZQM3 GSIB_SALTY Glutathione-binding protein gsiB | 14 |  | QGVKFQDGADFNAAAVK                   | 93  | 17 | 6 | 39.79 | b8b10b12*b12y11y12   | 1765.87 | 80.014  | 11473 | 2 | 883.44  | -8.64  |
| Q8ZQM3 GSIB_SALTY Glutathione-binding protein gsiB | 15 |  | NIakteVVDPATVK                      | 130 | 14 | 3 | 24.75 | b6y7y8               | 1484.84 | 58.550  | 6646  | 2 | 742.92  | 2.38   |
| Q8ZQM3 GSIB_SALTY Glutathione-binding protein gsiB | 16 |  | FAGYWQQGLPKLDSITWRPVTDN<br>NTR      | 203 | 26 | 3 | 12.15 | b9b16y10             | 3063.56 | 84.167  | 3972  | 4 | 766.65  | 6.14   |
| Q8ZQM3 GSIB_SALTY Glutathione-binding protein gsiB | 17 |  | FQDGADFNAAAVKANLDR                  | 97  | 18 | 3 | 15.6  | b4b14y3              | 1922.96 | 81.026  | 3965  | 2 | 961.98  | 11.68  |
| Q8ZPD6 YNCE_SALTY Uncharacterized protein yncE     | 1  |  | TFDTPTYPNLSALSADGK                  | 308 | 18 | 5 | 15.6  | b3y2y11y14y18        | 1897.94 | 66.505  | 25903 | 2 | 949.47  | 9.91   |
| Q8ZPD6 YNCE_SALTY Uncharacterized protein yncE     | 2  |  | EQEATQPDDVIR                        | 338 | 12 | 8 | 64.21 | y1y2y3y6y8y9y10y12   | 1400.66 | 40.199  | 19567 | 2 | 700.84  | -0.87  |
| Q8ZPD6 YNCE_SALTY Uncharacterized protein yncE     | 3  |  | QAGQVSVIDAK                         | 291 | 11 | 4 | 24.33 | b9y4y9y11            | 1115.60 | 38.288  | 19279 | 2 | 558.30  | -2.95  |
| Q8ZPD6 YNCE_SALTY Uncharacterized protein yncE     | 4  |  | MSTGLALDSK                          | 185 | 10 | 4 | 28.7  | b5b6y7y10            | 1022.52 | 46.828  | 11629 | 2 | 511.76  | -2.15  |
| Q8ZPD6 YNCE_SALTY Uncharacterized protein yncE     | 5  |  | IAAPASLAVLFNPTR                     | 268 | 15 | 8 | 24.18 | b1b6y1y5°y5*y5y6y15  | 1540.88 | 90.626  | 8587  | 2 | 770.94  | -1.90  |
| Q8ZPD6 YNCE_SALTY Uncharacterized protein yncE     | 6  |  | EHFFINLSLDTAGHR                     | 229 | 15 | 4 | 18.16 | b3b10y1y10           | 1756.90 | 96.661  | 7604  | 2 | 878.95  | 13.55  |
| Q8ZPD6 YNCE_SALTY Uncharacterized protein yncE     | 7  |  | ELVADAATNTIYISGVGKESAIWV<br>VDGETIK | 144 | 31 | 6 | 35.45 | b14b15y2y12y13y31    | 3249.71 | 105.107 | 4798  | 3 | 1083.91 | 5.78   |
| Q8ZPD6 YNCE_SALTY Uncharacterized protein yncE     | 8  |  | LLDDGKEHFFINLSLDTAGHR               | 223 | 21 | 4 | 24.73 | b4b7b8y19            | 2398.18 | 93.223  | 3130  | 3 | 800.07  | -13.84 |
| Q8ZPD6 YNCE_SALTY Uncharacterized protein yncE     | 9  |  | LLDDGK                              | 223 | 6  | 1 | 13.63 | y4                   | 660.36  | 34.639  | 4400  | 1 | 660.36  | 2.03   |
| Q8ZPD6 YNCE_SALTY Uncharacterized protein yncE     | 10 |  | ESAIWVVVDGETIK                      | 162 | 13 | 3 | 20.67 | b4y9y11              | 1446.72 | 44.102  | 3748  | 2 | 723.87  | -16.79 |
| Q8ZPD6 YNCE_SALTY Uncharacterized protein yncE     | 11 |  | ELVADAATNTIYISGVGK                  | 144 | 18 | 3 | 22.76 | b4b9b13              | 1821.93 | 136.286 | 2331  | 2 | 911.47  | -16.08 |

|                                                    |    |                                                                         |                                                  |     |    |   |       |                       |         |         |       |   |         |        |
|----------------------------------------------------|----|-------------------------------------------------------------------------|--------------------------------------------------|-----|----|---|-------|-----------------------|---------|---------|-------|---|---------|--------|
| Q8ZPD6 YNCE_SALTY Uncharacterized protein yncE     | 12 |                                                                         | LVL DAR                                          | 126 | 6  | 1 | 13.63 | y5                    | 686.41  | 40.226  | 1534  | 2 | 343.71  | -7.47  |
| Q8ZPD6 YNCE_SALTY Uncharacterized protein yncE     | 13 |                                                                         | NEAYVTHRQAGQVSVIDAK                              | 283 | 19 | 4 | 14.96 | b6°b6b12y8            | 2086.07 | 65.190  | 10373 | 3 | 696.03  | 2.46   |
| Q8ZPD6 YNCE_SALTY Uncharacterized protein yncE     | 14 |                                                                         | MSTGLALDSKAQR                                    | 185 | 13 | 4 | 32.35 | b6b11b12y6            | 1377.73 | 73.400  | 10231 | 2 | 689.37  | 12.49  |
| Q8ZPD6 YNCE_SALTY Uncharacterized protein yncE     | 15 |                                                                         | GAYEMAWSQQENALWLATSQSR<br>K                      | 41  | 23 | 3 | 13.06 | b3y7y20               | 2655.24 | 55.645  | 5678  | 3 | 885.75  | -9.47  |
| Q8ZPD6 YNCE_SALTY Uncharacterized protein yncE     | 16 |                                                                         | AQRLYTTNADGEFITIDTASNK                           | 195 | 22 | 5 | 13.45 | b8b10*b10y6*y6        | 2429.16 | 96.233  | 1916  | 2 | 1215.08 | -14.67 |
| Q8ZPD6 YNCE_SALTY Uncharacterized protein yncE     | 17 |                                                                         | AVGKGAYEMAWSQQENALWLAT<br>SQSR                   | 37  | 26 | 4 | 18.3  | b5b10b12°b12          | 2882.42 | 100.369 | 1751  | 4 | 721.36  | 12.11  |
| Q8ZPD6 YNCE_SALTY Uncharacterized protein yncE     | 18 | Phosphoryl STY(11)                                                      | ESAIWVVDGETIK                                    | 162 | 13 | 4 | 29.71 | b6b10y3y7             | 1526.71 | 35.976  | 2227  | 3 | 509.58  | 6.64   |
| Q8ZPD6 YNCE_SALTY Uncharacterized protein yncE     | 19 | Oxidation+M(1)                                                          | MSTGLALDSK                                       | 185 | 10 | 5 | 41.14 | b6b7y3y9°y9           | 1038.51 | 47.905  | 9904  | 2 | 519.76  | -2.12  |
| P37589 PMRD_SALTY Signal transduction protein pmrD | 1  | Carbamidomethyl+C(2);<br>Carbamidomethyl+C(8)                           | ACHVLVLCDSGGSLK                                  | 14  | 15 | 4 | 29.48 | b5b6b9y12             | 1615.81 | 66.204  | 12614 | 2 | 808.41  | 12.69  |
| P37589 PMRD_SALTY Signal transduction protein pmrD | 2  | Carbamidomethyl+C(26)                                                   | MIAEANSMILLSPGDILSPLQDAQY<br>CINR                | 29  | 29 | 9 | 66.16 | b5b7y1y6y7y8y9y10y13  | 3233.56 | 117.017 | 3020  | 3 | 1078.52 | -13.59 |
| P37589 PMRD_SALTY Signal transduction protein pmrD | 3  | Carbamidomethyl+C(2);<br>Carbamidomethyl+C(8);<br>Carbamidomethyl+C(41) | ACHVLVLCDSGGSLKMIAEANS<br>MILLSPGDILSPLQDAQYCINR | 14  | 44 | 3 | 16.52 | b8b10b13              | 4830.36 | 107.673 | 7790  | 4 | 1208.35 | -2.33  |
| P37589 PMRD_SALTY Signal transduction protein pmrD | 4  | Carbamidomethyl+C(26)<br>;Phosphoryl STY(12)                            | MIAEANSMILLSPGDILSPLQDAQY<br>CINR                | 29  | 29 | 7 | 29.02 | b6b11b12b20y5y8*y8    | 3313.59 | 101.926 | 8500  | 3 | 1105.20 | 10.90  |
| P37589 PMRD_SALTY Signal transduction protein pmrD | 5  | Carbamidomethyl+C(26)<br>;Oxidation+M()                                 | MIAEANSMILLSPGDILSPLQDAQY<br>CINR                | 29  | 29 | 6 | 22.15 | b13y3*y3y7*y7y8       | 3249.58 | 78.868  | 11850 | 3 | 1083.87 | -3.61  |
| P0A277 XGPT_SALTY Xanthine phohoribosyltransferase | 1  |                                                                         | LMPSEQWK                                         | 22  | 8  | 3 | 36.13 | b7y3y6                | 1018.50 | 48.517  | 16775 | 2 | 509.75  | -0.24  |
| P0A277 XGPT_SALTY Xanthine phohoribosyltransferase | 2  |                                                                         | GGLVPGALLAR                                      | 37  | 11 | 4 | 24.33 | b3y2y3y7              | 1023.62 | 69.776  | 9531  | 2 | 512.31  | -10.37 |
| P0A277 XGPT_SALTY Xanthine phohoribosyltransferase | 3  | Carbamidomethyl+C(6)                                                    | HVDTVCISSYDHDNQR                                 | 53  | 16 | 8 | 64.79 | b3°b3b4b5b6y4y5°y5    | 1945.83 | 39.769  | 3911  | 3 | 649.28  | -6.65  |
| P0A277 XGPT_SALTY Xanthine phohoribosyltransferase | 4  |                                                                         | AEGDGEFVIDDLVDTGGTAVAI<br>R                      | 76  | 25 | 3 | 21.96 | b14y14y15             | 2490.23 | 81.032  | 1936  | 3 | 830.75  | -4.12  |
| P0A277 XGPT_SALTY Xanthine phohoribosyltransferase | 5  | Carbamidomethyl+C(6)                                                    | HVDTVCISSYDHDNQRELK                              | 53  | 19 | 7 | 45.7  | b6b8y8y9*y9y10y12     | 2316.05 | 74.128  | 17428 | 3 | 772.69  | -7.17  |
| P0A277 XGPT_SALTY Xanthine phohoribosyltransferase | 6  |                                                                         | RAEGDGEFVIDDLVDTGGTAV<br>AIR                     | 75  | 26 | 3 | 18.3  | b4b6b10               | 2646.32 | 75.383  | 7776  | 3 | 882.78  | -6.18  |
| P0A1V6 KPRS_SALTY Ribose-phohate pyrophohokinase   | 1  |                                                                         | LYTSLGDAAVGR                                     | 22  | 12 | 5 | 29.51 | y6°y6y7y10y12         | 1222.64 | 53.189  | 19401 | 2 | 611.83  | 1.70   |
| P0A1V6 KPRS_SALTY Ribose-phohate pyrophohokinase   | 2  |                                                                         | LFAGNATPELAQR                                    | 5   | 13 | 8 | 64.16 | b3b4y5y6y10y11°y11y13 | 1387.74 | 54.541  | 16203 | 2 | 694.37  | 5.81   |
| P0A1V6 KPRS_SALTY Ribose-phohate pyrophohokinase   | 3  |                                                                         | VFAYATHPIFSGNAANNLR                              | 243 | 19 | 4 | 23.68 | b13y8y10y16           | 2063.03 | 65.979  | 14066 | 3 | 688.35  | -9.82  |
| P0A1V6 KPRS_SALTY Ribose-phohate pyrophohokinase   | 4  | Carbamidomethyl+C(10)                                                   | NSVIDEVVVCDTIPTLDEIK                             | 262 | 20 | 8 | 28.05 | b3b8°b8*b8b11y7y12y20 | 2259.17 | 89.029  | 8853  | 2 | 1130.09 | 11.35  |
| P0A1V6 KPRS_SALTY Ribose-phohate pyrophohokinase   | 5  |                                                                         | ITAVIPYFGYAR                                     | 84  | 12 | 3 | 22.3  | b4y7y10               | 1370.74 | 81.355  | 16080 | 2 | 685.88  | -2.14  |
| P0A1V6 KPRS_SALTY Ribose-phohate pyrophohokinase   | 6  |                                                                         | ANVSQVMHIIGDVAGR                                 | 198 | 16 | 4 | 35.11 | b3b9b12b13            | 1666.84 | 80.003  | 11409 | 3 | 556.28  | -18.24 |
| P0A1V6 KPRS_SALTY Ribose-phohate pyrophohokinase   | 7  | Carbamidomethyl+C(2);<br>Carbamidomethyl+C(16)                          | DCVLVDDMIDTGGTLCK                                | 214 | 17 | 5 | 29.95 | b4b6°b6y6y7           | 1911.87 | 80.249  | 3120  | 3 | 637.96  | 9.83   |
| P0A1V6 KPRS_SALTY Ribose-phohate pyrophohokinase   | 8  |                                                                         | RISNEESISAMFEH                                   | 301 | 14 | 3 | 19.31 | b4y10y13              | 1649.75 | 93.271  | 2253  | 3 | 550.59  | -8.14  |

|                                                  |    |                       |                                        |     |    |   |       |                                  |         |         |       |   |         |        |
|--------------------------------------------------|----|-----------------------|----------------------------------------|-----|----|---|-------|----------------------------------|---------|---------|-------|---|---------|--------|
| P0A1V6 KPRS_SALTY Ribose-phohate pyrophohokinase | 9  | Phosphoryl STY(6)     | VFAYATHPIFSGNAANNLR                    | 243 | 19 | 3 | 24.13 | b4b5b9                           | 2142.98 | 58.070  | 8719  | 4 | 536.50  | -9.91  |
| P0A1V6 KPRS_SALTY Ribose-phohate pyrophohokinase | 10 | Oxidation+M(7)        | LLNDTDMAIIDKR                          | 182 | 13 | 5 | 32.35 | b3b10b11*b11y9                   | 1533.78 | 70.533  | 7560  | 2 | 767.39  | -7.96  |
| P0A2F4 SODF_SALTY Superoxide dismutase [Fe]      | 1  | Carbamidomethyl+C(22) | TSEGGIFNNAAQVWNHTFYWNCL<br>APNAGGEPTGK | 58  | 34 | 9 | 24.31 | b2b6°b6y2y4y10y11y13y3<br>4      | 3708.72 | 97.116  | 23497 | 3 | 1236.91 | 8.56   |
| P0A2F4 SODF_SALTY Superoxide dismutase [Fe]      | 2  |                       | SFELPALPYAKDALAPHISAETLEY<br>HYGK      | 1   | 29 | 7 | 19.93 | b1b9b11b17y1y8y10                | 3231.63 | 82.052  | 19896 | 4 | 808.66  | -0.68  |
| P0A2F4 SODF_SALTY Superoxide dismutase [Fe]      | 3  |                       | DALAPHISAETLEYHYGK                     | 12  | 18 | 4 | 15.6  | b5°b5y9y11                       | 2015.00 | 76.697  | 34950 | 2 | 1008.00 | 7.39   |
| P0A2F4 SODF_SALTY Superoxide dismutase [Fe]      | 4  |                       | NARPNYLEHFWALVNWEFVAK                  | 168 | 21 | 6 | 23.54 | b3b4*b4b10°b10*b10               | 2604.30 | 105.160 | 10915 | 3 | 868.77  | -4.22  |
| P0A2F4 SODF_SALTY Superoxide dismutase [Fe]      | 5  |                       | LADAIAASFGSFAEFK                       | 92  | 16 | 9 | 59.06 | b3b5b10b11°b11b14y3y6°y<br>6     | 1644.79 | 105.966 | 5681  | 2 | 822.90  | -22.19 |
| P0A2F4 SODF_SALTY Superoxide dismutase [Fe]      | 6  |                       | NFGSGWTWLVK                            | 117 | 11 | 5 | 50.57 | b3b4b6b10*b10                    | 1294.68 | 53.102  | 4385  | 2 | 647.84  | 18.39  |
| P0A2F4 SODF_SALTY Superoxide dismutase [Fe]      | 7  |                       | AQFTDAAIKNFGSGWTWLVK                   | 108 | 20 | 4 | 22.52 | b9y11y12*y12                     | 2240.12 | 73.357  | 74405 | 3 | 747.38  | -11.23 |
| P0A2F4 SODF_SALTY Superoxide dismutase [Fe]      | 8  |                       | GTAFEGKSLEEIVR                         | 44  | 14 | 3 | 19.31 | b3y4y10                          | 1535.82 | 63.109  | 7537  | 3 | 512.61  | 9.78   |
| P0A2F4 SODF_SALTY Superoxide dismutase [Fe]      | 9  |                       | NARPNYLEHFWALVNWEFVAKN<br>LAA          | 168 | 25 | 4 | 12.42 | b6b9°b9y11                       | 2973.51 | 112.415 | 2871  | 3 | 991.84  | -1.48  |
| P0A2F4 SODF_SALTY Superoxide dismutase [Fe]      | 10 | Phosphoryl STY(7)     | NFGSGWTWLVK                            | 117 | 11 | 5 | 36.77 | b3y3y4y6°y6                      | 1374.63 | 43.131  | 34079 | 3 | 458.88  | 13.14  |
| O54296 RS11_SALTY 30S ribosomal protein S11      | 1  | Carbamidomethyl+C(1)  | CADAVKEYGIK                            | 69  | 11 | 7 | 31.32 | b1b2b3b4b10y2y11                 | 1253.60 | 37.850  | 26297 | 3 | 418.54  | -13.92 |
| O54296 RS11_SALTY 30S ribosomal protein S11      | 2  |                       | ALNAAGFR                               | 98  | 8  | 5 | 40.9  | y3y5y6*y6y8                      | 819.45  | 42.522  | 21467 | 2 | 410.23  | 1.42   |
| O54296 RS11_SALTY 30S ribosomal protein S11      | 3  |                       | STPFAAQVAAER                           | 57  | 12 | 5 | 44.96 | b2y4y7y8y10                      | 1247.64 | 50.273  | 17670 | 2 | 624.32  | -1.86  |
| O54296 RS11_SALTY 30S ribosomal protein S11      | 4  |                       | QGNALGWATAGGSGFR                       | 37  | 16 | 3 | 24.89 | y8y11y14                         | 1549.76 | 66.795  | 7601  | 2 | 775.38  | 7.72   |
| O54296 RS11_SALTY 30S ribosomal protein S11      | 5  |                       | EYGIK                                  | 75  | 5  | 1 | 13.23 | y3                               | 609.32  | 66.206  | 7072  | 1 | 609.32  | -13.62 |
| O54296 RS11_SALTY 30S ribosomal protein S11      | 6  |                       | QVSDGVAHIHASFNNITIVTITDR               | 14  | 23 | 9 | 35.36 | b6°b6b10b12y12*y12y13y<br>19*y19 | 2495.29 | 68.549  | 2648  | 3 | 832.43  | 9.88   |
| O54296 RS11_SALTY 30S ribosomal protein S11      | 7  | Phosphoryl STY(16)    | QVSDGVAHIHASFNNITIVTITDR               | 14  | 23 | 5 | 20.15 | b8b12*b12b15y9                   | 2575.22 | 111.183 | 4375  | 3 | 859.08  | 1.61   |
| P26976 PHON_SALTY Non-ecific acid phohatase      | 1  |                       | IFSPVVGAK                              | 85  | 9  | 5 | 38.3  | b2y3y4y6y9                       | 917.54  | 51.811  | 28225 | 2 | 459.27  | -8.58  |
| P26976 PHON_SALTY Non-ecific acid phohatase      | 2  |                       | QAAEDADVSVENIAR                        | 70  | 15 | 8 | 45.59 | b2b4b12°b12y10y11*y11y<br>12     | 1587.77 | 51.361  | 9740  | 2 | 794.39  | 3.38   |
| P26976 PHON_SALTY Non-ecific acid phohatase      | 3  | Carbamidomethyl+C(3)  | VICGAHWQSDVDAGR                        | 191 | 15 | 4 | 18.16 | b8y3y9y15                        | 1670.78 | 45.965  | 4861  | 2 | 835.89  | 3.80   |
| P26976 PHON_SALTY Non-ecific acid phohatase      | 4  |                       | LQTIPAFQK                              | 215 | 9  | 3 | 38.3  | y4y5y7                           | 1045.60 | 55.731  | 34116 | 2 | 523.30  | -6.77  |
| P26976 PHON_SALTY Non-ecific acid phohatase      | 5  |                       | NGSYPSGHTAYGTLLALVLSEARP<br>ER         | 150 | 26 | 5 | 21.93 | b3°b3b4°b4y8                     | 2759.38 | 96.999  | 29127 | 4 | 690.60  | -12.30 |
| P26976 PHON_SALTY Non-ecific acid phohatase      | 6  |                       | YVGAVEFAR                              | 206 | 9  | 4 | 30.51 | b3y4°y4y7                        | 1011.52 | 51.986  | 15837 | 2 | 506.26  | -9.59  |
| P26976 PHON_SALTY Non-ecific acid phohatase      | 7  |                       | NLLTMGGYYATASAK                        | 108 | 15 | 4 | 25.83 | b8b13y3y8                        | 1560.74 | 74.732  | 2727  | 2 | 780.88  | -19.01 |
| P26976 PHON_SALTY Non-ecific acid phohatase      | 8  |                       | EELNDK                                 | 230 | 6  | 4 | 26.87 | b3°b3b4°b4                       | 747.36  | 79.857  | 1595  | 1 | 747.36  | 11.35  |
| P26976 PHON_SALTY Non-ecific acid phohatase      | 9  |                       | WKQAAEDADVSVENIAR                      | 68  | 17 | 3 | 23.33 | b8b9y9                           | 1901.94 | 55.058  | 5690  | 2 | 951.48  | 4.94   |
| P26976 PHON_SALTY Non-ecific acid phohatase      | 10 | Carbamidomethyl+C(3)  | VICGAHWQSDVDAGRYVGAVEF<br>AR           | 191 | 24 | 5 | 16.89 | b3b22y9y13°y13                   | 2663.25 | 77.030  | 3793  | 4 | 666.57  | -9.44  |

|                                                         |    |                       |                                             |     |    |   |       |                       |         |         |       |   |         |        |
|---------------------------------------------------------|----|-----------------------|---------------------------------------------|-----|----|---|-------|-----------------------|---------|---------|-------|---|---------|--------|
| P26976 PHON_SALTY Non-ecific acid phohatase             | 11 |                       | NNLLSKEDHPK                                 | 236 | 11 | 3 | 24.33 | b3b7y6                | 1294.67 | 61.976  | 1933  | 3 | 432.23  | -1.70  |
| P65599 ORN_SALTY Oligoribonuclease                      | 1  |                       | SADENNLIWIDLEMTGLDPER                       | 1   | 21 | 4 | 21.72 | b8y5y7y11             | 2431.15 | 83.441  | 12295 | 3 | 811.05  | 2.21   |
| P65599 ORN_SALTY Oligoribonuclease                      | 2  |                       | THTGSGLVDR                                  | 64  | 10 | 5 | 41.71 | b3b6b8°b8y10          | 1042.52 | 32.541  | 3034  | 3 | 348.18  | -5.27  |
| P65599 ORN_SALTY Oligoribonuclease                      | 3  |                       | SADENNLIWIDLEMTGLDPERDR                     | 1   | 23 | 8 | 17.51 | b1°b1b3b12°b12y5°y5y9 | 2702.25 | 93.217  | 2517  | 4 | 676.32  | -7.41  |
| P65599 ORN_SALTY Oligoribonuclease                      | 4  | Carbamidomethyl+C(4)  | SPICGNSIGQDR                                | 101 | 12 | 3 | 26.28 | b8b9y10               | 1303.62 | 72.243  | 1801  | 3 | 435.21  | 7.40   |
| P65599 ORN_SALTY Oligoribonuclease                      | 5  | Carbamidomethyl+C(11) | TWVPAGKSPICGNSIGQDR                         | 94  | 19 | 4 | 14.96 | b12°b12y6y11          | 2043.04 | 69.760  | 48783 | 3 | 681.68  | 13.50  |
| P65599 ORN_SALTY Oligoribonuclease                      | 6  |                       | SADENNLIWIDLEMTGLDPERDR                     | 1   | 23 | 6 | 40.04 | b10b11b12°b12y5y10    | 2702.25 | 93.835  | 22544 | 4 | 676.32  | -7.77  |
| P65599 ORN_SALTY Oligoribonuclease                      | 7  |                       | ESVAELAYYREHFIK                             | 165 | 15 | 4 | 34.7  | b3b4°b4b5             | 1854.94 | 83.300  | 1775  | 2 | 927.97  | 0.13   |
| P65599 ORN_SALTY Oligoribonuclease                      | 8  | Oxidation+M(1)        | MSADENNLIWIDLEMTGLDPERD<br>R                | 0   | 24 | 6 | 42.91 | b11y5y6y7y9y13        | 2849.28 | 89.715  | 5467  | 4 | 713.08  | -9.34  |
| P65599 ORN_SALTY Oligoribonuclease                      | 9  |                       | SADENNLIWIDLEMTGLDPER                       | 1   | 21 | 0 | 6.45  |                       | 2414.13 | 83.433  | 39125 | 3 | 805.38  | 7.69   |
| P43019 SODM_SALTY Superoxide dismutase [Mn]             | 1  |                       | LAVVSTANQDSPLMGEAISGASGF<br>PILGLDVWEHAYYLK | 138 | 39 | 6 | 15.69 | b2b3b12y4y9y11        | 4120.10 | 116.927 | 8428  | 3 | 1374.04 | 7.11   |
| P43019 SODM_SALTY Superoxide dismutase [Mn]             | 2  |                       | SYTLPSLPYAYDALEPHFDK                        | 1   | 20 | 8 | 45.91 | b1b3b11b12b14y5y11y13 | 2327.10 | 88.714  | 8301  | 3 | 776.37  | -7.87  |
| P43019 SODM_SALTY Superoxide dismutase [Mn]             | 3  |                       | RPDYIKEFWNVVNWDEAAAR                        | 181 | 20 | 4 | 19.79 | b4b8y3y19             | 2479.19 | 104.031 | 1720  | 4 | 620.55  | -11.32 |
| P43019 SODM_SALTY Superoxide dismutase [Mn]             | 4  |                       | AAIER                                       | 100 | 5  | 1 | 13.23 | y4                    | 559.31  | 46.135  | 14674 | 1 | 559.31  | -9.93  |
| P43019 SODM_SALTY Superoxide dismutase [Mn]             | 5  |                       | MSYTLPSLPYAYDALEPHFDK                       | 0   | 21 | 5 | 18.95 | b4b6y6°y6y9           | 2458.20 | 65.248  | 4824  | 4 | 615.31  | 14.50  |
| P43019 SODM_SALTY Superoxide dismutase [Mn]             | 6  |                       | SYTLPSLPYAYDALEPHFDKQTME<br>IHHTK           | 1   | 29 | 7 | 24.26 | b3°b3y3°y3y12y22y25   | 3432.62 | 79.870  | 69084 | 5 | 687.33  | -10.74 |
| Q8ZRN1 METQ_SALTY D-methionine-binding lipoprotein metQ | 1  |                       | IVELEAPQLPR                                 | 178 | 11 | 7 | 53.01 | b1b3y5y6y7y9y11       | 1264.72 | 67.041  | 59330 | 2 | 632.86  | -5.89  |
| Q8ZRN1 METQ_SALTY D-methionine-binding lipoprotein metQ | 2  |                       | LKDGVGLLPTSLDIVENPK                         | 156 | 19 | 8 | 46.24 | y2y4y5y7y10°y10y11y19 | 2008.12 | 80.035  | 40314 | 3 | 670.04  | -7.96  |
| Q8ZRN1 METQ_SALTY D-methionine-binding lipoprotein metQ | 3  |                       | DGIFVEDKDSPYVNLIVTR                         | 215 | 19 | 3 | 14.96 | b8b11y17              | 2180.10 | 80.000  | 7674  | 3 | 727.37  | -10.08 |
| Q8ZRN1 METQ_SALTY D-methionine-binding lipoprotein metQ | 4  |                       | FVQAYQSDEVYEAANK                            | 245 | 16 | 5 | 17.18 | b4y8°y8y11y16         | 1861.88 | 84.186  | 7316  | 2 | 931.45  | 12.78  |
| Q8ZRN1 METQ_SALTY D-methionine-binding lipoprotein metQ | 5  |                       | GDIDANAFQHKKPYLDQQIK                        | 78  | 19 | 3 | 22.74 | b3b4y7                | 2201.08 | 66.976  | 4289  | 2 | 1101.04 | -10.76 |
| Q8ZRN1 METQ_SALTY D-methionine-binding lipoprotein metQ | 6  |                       | DSPYVNLIVTR                                 | 223 | 11 | 4 | 31.32 | b5b6b10°b10           | 1276.70 | 62.039  | 3969  | 3 | 426.24  | 9.56   |
| Q8ZRN1 METQ_SALTY D-methionine-binding lipoprotein metQ | 7  |                       | DGSQVAVPNDPTNLGR                            | 128 | 16 | 5 | 37.92 | b6b8b9b11y10          | 1639.80 | 65.219  | 5443  | 3 | 547.27  | -4.17  |
| Q8ZRN1 METQ_SALTY D-methionine-binding lipoprotein metQ | 8  |                       | DAENVK                                      | 238 | 6  | 2 | 13.63 | b5°b5                 | 675.33  | 65.066  | 4792  | 1 | 675.33  | 0.27   |
| Q8ZRN1 METQ_SALTY D-methionine-binding lipoprotein metQ | 9  |                       | DGIFVEDK                                    | 215 | 8  | 3 | 36.13 | b7y5y7                | 922.46  | 86.782  | 1513  | 1 | 922.46  | 3.71   |

|                                                         |    |                       |                                              |     |    |   |       |                                    |         |         |        |   |         |        |
|---------------------------------------------------------|----|-----------------------|----------------------------------------------|-----|----|---|-------|------------------------------------|---------|---------|--------|---|---------|--------|
| Q8ZRN1 METQ_SALTY D-methionine-binding lipoprotein metQ | 10 |                       | FVQAYQSDEVYEAAKVFNGGA<br>VK                  | 245 | 24 | 8 | 32.95 | b3b10y4y6y7*y7y22°y22              | 2634.29 | 78.364  | 24815  | 3 | 878.77  | 3.34   |
| Q8ZRN1 METQ_SALTY D-methionine-binding lipoprotein metQ | 11 |                       | SLDELKDGSQLVAVPNDPTNLGR                      | 122 | 22 | 6 | 25.64 | b3°b3b13y6y9y19                    | 2325.19 | 58.570  | 4621   | 2 | 1163.10 | 9.66   |
| Q8ZRN1 METQ_SALTY D-methionine-binding lipoprotein metQ | 12 | Phosphoryl STY(10)    | LKDGVLTLPTSLDIVENPK                          | 156 | 19 | 3 | 14.96 | b10y7y9                            | 2088.11 | 85.390  | 179934 | 3 | 696.71  | 8.89   |
| Q8ZRN1 METQ_SALTY D-methionine-binding lipoprotein metQ | 13 | Phosphoryl STY(13)    | YGLDVELVTFNDYVLPNEALSK                       | 56  | 22 | 7 | 18.2  | b3b11y7*y7y11_H3PO4<br>y11°y11*y11 | 2579.25 | 117.003 | 1800   | 3 | 860.42  | 9.09   |
| P0A212 GYRI_SALTY DNA gyrase inhibitory protein homolog | 1  |                       | IVPVEWIAVYYDNPDPVPAEK                        | 41  | 21 | 7 | 30.04 | b2y4y8y11°y11y12y21                | 2416.24 | 97.210  | 19353  | 3 | 806.09  | -0.30  |
| P0A212 GYRI_SALTY DNA gyrase inhibitory protein homolog | 2  |                       | IAGFHMVGPWEHTVK                              | 12  | 15 | 9 | 66.32 | b3b10b11b12°b12b13y5y8<br>y15      | 1708.89 | 90.655  | 9989   | 3 | 570.30  | 13.22  |
| P0A212 GYRI_SALTY DNA gyrase inhibitory protein homolog | 3  | Carbamidomethyl+C(1)  | CDTVVSVAENFILPDNSEGVIVTAI<br>EGGEYATAVAR     | 64  | 36 | 4 | 10.9  | b11y2y8y23                         | 3766.81 | 93.787  | 3380   | 4 | 942.46  | -9.14  |
| P0A212 GYRI_SALTY DNA gyrase inhibitory protein homolog | 4  |                       | DYEIR                                        | 1   | 5  | 1 | 13.23 | y3                                 | 695.34  | 49.634  | 1705   | 1 | 695.34  | 12.11  |
| P0A212 GYRI_SALTY DNA gyrase inhibitory protein homolog | 5  |                       | IAGFHMVGPWEHTVKQGFEQLM<br>TWVDR              | 12  | 27 | 4 | 21.92 | b10b11y11°y11                      | 3199.53 | 84.418  | 28708  | 4 | 800.64  | -8.78  |
| P0A212 GYRI_SALTY DNA gyrase inhibitory protein homolog | 6  |                       | VEDRDFAKPWER                                 | 100 | 12 | 4 | 37.3  | b5b9b11y10                         | 1547.77 | 80.486  | 5845   | 2 | 774.39  | 9.46   |
| Q7CPP7 RL21_SALTY 50S ribosomal protein L21             | 1  |                       | MYAVFQSGGK                                   | 0   | 10 | 7 | 52.61 | b3b7y5y6y8*y8y10                   | 1087.52 | 53.015  | 54077  | 2 | 544.26  | -4.04  |
| Q7CPP7 RL21_SALTY 50S ribosomal protein L21             | 2  |                       | IGVPFVDGGVIK                                 | 48  | 12 | 5 | 32.52 | y2y5y7y9y12                        | 1200.69 | 77.596  | 50888  | 2 | 600.85  | -3.86  |
| Q7CPP7 RL21_SALTY 50S ribosomal protein L21             | 3  |                       | LDIATGETIEFAEVLMIANGEEVK                     | 24  | 24 | 6 | 23.65 | b3°b3b11y3y5y9                     | 2592.27 | 117.946 | 27950  | 3 | 864.76  | -16.76 |
| Q7CPP7 RL21_SALTY 50S ribosomal protein L21             | 4  |                       | QQGHRQWFTDVK                                 | 85  | 12 | 4 | 22.3  | b10y8y10*y10                       | 1529.76 | 70.610  | 8116   | 2 | 765.38  | -0.48  |
| Q7CPP7 RL21_SALTY 50S ribosomal protein L21             | 5  | Oxidation+M(16)       | LDIATGETIEFAEVLMIANGEEVK                     | 24  | 24 | 4 | 22.02 | b7°b7y10y11                        | 2608.30 | 63.294  | 6251   | 4 | 652.83  | -2.43  |
| P0A1F8 DHAS_SALTY Aartate-semialdehyde dehydrogenase    | 1  |                       | ELLTQMGQLYGHVADELATPSSAI<br>LDIER            | 174 | 29 | 8 | 29.02 | b17b19y3y5y10y11y29*y2<br>9        | 3170.62 | 105.821 | 31996  | 3 | 1057.54 | 4.47   |
| P0A1F8 DHAS_SALTY Aartate-semialdehyde dehydrogenase    | 2  | Carbamidomethyl+C(14) | ILNTASVIPVDGLCVR                             | 252 | 16 | 6 | 37.92 | b5y5y8y9y11y16                     | 1726.96 | 78.585  | 27615  | 2 | 863.98  | 5.23   |
| P0A1F8 DHAS_SALTY Aartate-semialdehyde dehydrogenase    | 3  |                       | MKDDAIILDPVNQDVITDGLNNG<br>VK                | 103 | 26 | 7 | 21.93 | b8y9°y9*y9y10*y10y26               | 2810.48 | 86.669  | 19460  | 3 | 937.50  | 5.91   |
| P0A1F8 DHAS_SALTY Aartate-semialdehyde dehydrogenase    | 4  |                       | LNMGPFLSAFTVGDQLLWGAAE<br>PLRR               | 335 | 27 | 7 | 25.91 | b4*b4b7°b7*b7b10b12                | 2988.55 | 119.164 | 17236  | 3 | 996.85  | 3.19   |
| P0A1F8 DHAS_SALTY Aartate-semialdehyde dehydrogenase    | 5  | Carbamidomethyl+C(8)  | ALDIIVTCQGGDYTNEIYPK                         | 65  | 20 | 3 | 14.39 | b8y6y11                            | 2270.08 | 84.202  | 16032  | 3 | 757.36  | -9.46  |
| P0A1F8 DHAS_SALTY Aartate-semialdehyde dehydrogenase    | 6  |                       | GMVGSVLMQR                                   | 10  | 10 | 6 | 28.7  | b2b8b9b10y7*y7                     | 1077.54 | 59.204  | 11627  | 2 | 539.28  | -8.84  |
| P0A1F8 DHAS_SALTY Aartate-semialdehyde dehydrogenase    | 7  |                       | NVGFIGWR                                     | 2   | 8  | 4 | 18.13 | b4*b4y6y8                          | 948.50  | 70.786  | 10915  | 2 | 474.75  | -8.94  |
| P0A1F8 DHAS_SALTY Aartate-semialdehyde dehydrogenase    | 8  |                       | DFDAIRPVFFSTSQFGQAAPTFGD<br>TSTGTLQDAFDLDALK | 25  | 40 | 4 | 12.06 | b7b9y3y9                           | 4298.10 | 106.877 | 5278   | 3 | 1433.37 | 9.66   |
| P0A1F8 DHAS_SALTY Aartate-semialdehyde dehydrogenase    | 9  |                       | ELTPAAVTGTLTTPVGR                            | 315 | 17 | 4 | 26.18 | b9y4y9y14                          | 1683.93 | 69.488  | 24261  | 2 | 842.47  | 2.97   |
| P0A1F8 DHAS_SALTY Aartate-semialdehyde dehydrogenase    | 10 |                       | LNMGPFLSAFTVGDQLLWGAAE<br>PLR                | 335 | 26 | 3 | 18.3  | b3b6b13                            | 2832.47 | 94.506  | 13528  | 3 | 944.83  | 9.31   |
| P0A1F8 DHAS_SALTY Aartate-semialdehyde dehydrogenase    | 11 |                       | SGELPVDNFGVPLAGSLIPWIDK                      | 210 | 23 | 3 | 13.06 | b3b13y3                            | 2424.31 | 112.390 | 3598   | 2 | 1212.66 | 13.80  |
| P0A1F8 DHAS_SALTY Aartate-semialdehyde dehydrogenase    | 12 |                       | ESGWQGYWIDAASTLR                             | 87  | 16 | 3 | 17.18 | b3b12y6                            | 1839.91 | 78.248  | 1975   | 3 | 613.97  | 22.16  |

|                                                       |    |                    |                                     |     |    |    |       |                                  |         |         |       |   |         |        |
|-------------------------------------------------------|----|--------------------|-------------------------------------|-----|----|----|-------|----------------------------------|---------|---------|-------|---|---------|--------|
| [P0A1F8]DHAS_SALTY Aartate-semialdehyde dehydrogenase | 13 |                    | VVPNDRDITMR                         | 304 | 11 | 3  | 24.33 | b5b8y9                           | 1315.69 | 31.117  | 27417 | 3 | 439.24  | 9.00   |
| [P0A1F8]DHAS_SALTY Aartate-semialdehyde dehydrogenase | 14 |                    | SGELPVDNFGVPLAGSLIPWIDKQ LDNGQSR    | 210 | 31 | 4  | 11.26 | b13y9y11*y11                     | 3322.72 | 111.693 | 8077  | 3 | 1108.24 | 3.01   |
| [P0A1F8]DHAS_SALTY Aartate-semialdehyde dehydrogenase | 15 |                    | EVSIPTVEELLAAHNPWAKVVPN DR          | 285 | 25 | 4  | 12.42 | b10b17°b17y7                     | 2784.48 | 100.287 | 5507  | 3 | 928.83  | 3.07   |
| [P0A1F8]DHAS_SALTY Aartate-semialdehyde dehydrogenase | 16 |                    | QLDNGQSREEWK                        | 233 | 12 | 3  | 26.28 | b9b10y4                          | 1489.70 | 53.084  | 4159  | 3 | 497.24  | -1.31  |
| [P0A1F8]DHAS_SALTY Aartate-semialdehyde dehydrogenase | 17 |                    | GMVGSVLMQRMVEER                     | 10  | 15 | 3  | 18.16 | b10y5y14                         | 1721.84 | 72.226  | 3945  | 3 | 574.62  | -4.32  |
| [P0A1F8]DHAS_SALTY Aartate-semialdehyde dehydrogenase | 18 | Phosphoryl STY(9)  | LNMGPPEFLSAFTVGDQLLWGAAE PLRR       | 335 | 27 | 3  | 21.92 | b7b8y3                           | 3068.49 | 78.855  | 12789 | 3 | 1023.50 | -0.88  |
| [P0A1F8]DHAS_SALTY Aartate-semialdehyde dehydrogenase | 19 | Phosphoryl STY(12) | ELTPAAVTGTLTTPVGR                   | 315 | 17 | 6  | 26.18 | b6°b6b10°b10b12y9                | 1763.88 | 78.590  | 5286  | 2 | 882.44  | -2.63  |
| [P0A1F8]DHAS_SALTY Aartate-semialdehyde dehydrogenase | 20 | Phosphoryl STY(15) | DITMRELTPAAVTGTLTTPVGR              | 310 | 22 | 5  | 25.64 | b7b12y7y9y11                     | 2380.16 | 112.566 | 3589  | 3 | 794.06  | -8.41  |
| [P0A1F8]DHAS_SALTY Aartate-semialdehyde dehydrogenase | 21 | Oxidation+M(3)     | LNMGPPEFLSAFTVGDQLLWGAAE PLR        | 335 | 26 | 4  | 22.83 | b9b10b22y9                       | 2848.42 | 91.649  | 23286 | 3 | 950.14  | -5.74  |
| [P0A1F8]DHAS_SALTY Aartate-semialdehyde dehydrogenase | 22 |                    | MKDDAIIMDPVNQDVITD                  | 103 | 19 | 1  | 8.48  | y11                              | 2128.10 | 86.630  | 4597  | 3 | 710.04  | 5.62   |
| [Q8ZL56]GPMI_SALTY 2                                  | 1  |                    | TFFANPVLटनाVDQAK                    | 91  | 16 | 7  | 46.01 | b2b3b5b9y11y12y14                | 1735.91 | 77.470  | 28650 | 2 | 868.46  | 2.11   |
| [Q8ZL56]GPMI_SALTY 2                                  | 2  |                    | LSDIAPTMSLMGMEIPQEMTGKP LFIVE       | 485 | 29 | 13 | 49.47 | b2b3°b3b4°b4b5°b5b8b9y1 y2°y2y13 | 3191.61 | 121.889 | 12407 | 3 | 1064.54 | 0.69   |
| [Q8ZL56]GPMI_SALTY 2                                  | 3  |                    | AFVNADFDFGAR                        | 272 | 12 | 6  | 44.96 | b2y5y6y9y11°y11                  | 1329.64 | 72.256  | 10451 | 2 | 665.32  | 14.60  |
| [Q8ZL56]GPMI_SALTY 2                                  | 4  |                    | IVYQDLTR                            | 75  | 8  | 3  | 33.12 | b5b6y5                           | 1007.54 | 56.577  | 4913  | 2 | 504.28  | -8.06  |
| [Q8ZL56]GPMI_SALTY 2                                  | 5  |                    | TPVMDALWAK                          | 31  | 10 | 3  | 26.94 | b8y6y8                           | 1131.59 | 72.362  | 17366 | 2 | 566.30  | 1.83   |
| [Q8ZL56]GPMI_SALTY 2                                  | 6  |                    | DPATGQAHTAHTNLPVPLIYVGE K           | 452 | 24 | 4  | 23.01 | b9°b9b10b12                      | 2529.30 | 85.190  | 15390 | 3 | 843.77  | -4.54  |
| [Q8ZL56]GPMI_SALTY 2                                  | 7  |                    | AVESVGGQLLITADHGNAEQMR              | 430 | 22 | 4  | 23.33 | b3b5b6°b6                        | 2296.15 | 83.253  | 10336 | 3 | 766.05  | 5.32   |
| [Q8ZL56]GPMI_SALTY 2                                  | 8  |                    | TAVAYPPASLANTFGEWMAK                | 303 | 20 | 4  | 14.39 | b7b12°b12y4                      | 2125.06 | 96.513  | 8057  | 2 | 1063.03 | 7.58   |
| [Q8ZL56]GPMI_SALTY 2                                  | 9  |                    | VATYDLQPEMSSAELTEK                  | 364 | 18 | 4  | 15.6  | b5y3y7°y7                        | 2011.97 | 91.150  | 4481  | 2 | 1006.49 | 8.98   |
| [Q8ZL56]GPMI_SALTY 2                                  | 10 |                    | QMGNSEVGHVNLGAGR                    | 59  | 16 | 4  | 30.83 | b3b4y3y5                         | 1625.81 | 97.866  | 3199  | 2 | 813.41  | 17.72  |
| [Q8ZL56]GPMI_SALTY 2                                  | 11 |                    | VVNLNFVMLTEYAADIK                   | 286 | 17 | 3  | 24.99 | y5y6y11                          | 1939.99 | 70.206  | 3181  | 2 | 970.50  | -15.79 |
| [Q8ZL56]GPMI_SALTY 2                                  | 12 |                    | LDVEIK                              | 83  | 6  | 1  | 13.63 | b4                               | 716.42  | 78.412  | 2892  | 1 | 716.42  | 2.22   |
| [Q8ZL56]GPMI_SALTY 2                                  | 13 |                    | AYDLMTLAQGEFQADTAVAGLQ AAYAR        | 202 | 27 | 3  | 11.92 | b6b10y13                         | 2845.35 | 74.291  | 2295  | 4 | 712.09  | -11.58 |
| [Q8ZL56]GPMI_SALTY 2                                  | 14 |                    | DPATGQAHTAHTNLPVPLIYVGE KNVK        | 452 | 27 | 3  | 22.77 | b4b10b11                         | 2870.50 | 110.756 | 59826 | 3 | 957.50  | -5.44  |
| [Q8ZL56]GPMI_SALTY 2                                  | 15 |                    | RPHTLIDASGLEVGLPDRQMGNSE VGHVNLGAGR | 41  | 34 | 5  | 36.49 | y6y13*y13y14y15                  | 3552.80 | 93.887  | 11038 | 3 | 1184.94 | -1.37  |
| [Q8ZL56]GPMI_SALTY 2                                  | 16 |                    | QMGNSEVGHVNLGAGRIVYQDL TR           | 59  | 24 | 3  | 12.72 | b22y4y8                          | 2614.35 | 88.782  | 4319  | 3 | 872.12  | 12.33  |
| [Q8ZL56]GPMI_SALTY 2                                  | 17 |                    | FEDKFAALGK                          | 168 | 10 | 3  | 33.93 | b6b8b9                           | 1125.60 | 50.617  | 4025  | 3 | 375.87  | 1.08   |
| [Q8ZL56]GPMI_SALTY 2                                  | 18 |                    | DTPPSAEASLK                         | 155 | 12 | 4  | 32.52 | b4°b4b7b10                       | 1271.65 | 40.763  | 2460  | 3 | 424.56  | -6.62  |
| [Q8ZL56]GPMI_SALTY 2                                  | 19 | Oxidation+M(1)     | MSVSKKPMVLVILDGYGYR                 | 0   | 19 | 5  | 23.68 | b4y3y7y11°y11                    | 2172.18 | 106.019 | 8422  | 3 | 724.73  | 11.46  |
| [P66738]RRF_SALTY Ribosome-recycling factor           | 1  |                    | QLASVTVEDSR                         | 52  | 11 | 6  | 36.09 | b2b11y5y6y7y11                   | 1204.62 | 40.658  | 25026 | 2 | 602.81  | 4.36   |
| [P66738]RRF_SALTY Ribosome-recycling factor           | 2  |                    | VDAALADKEAELMQF                     | 170 | 15 | 6  | 37.14 | b1b4b7b11y10y12                  | 1650.81 | 79.758  | 7238  | 2 | 825.91  | 4.29   |
| [P66738]RRF_SALTY Ribosome-recycling factor           | 3  |                    | ASPSLLDGIVVEYYGTPTPLR               | 31  | 21 | 4  | 37.45 | y5y10y11y12                      | 2248.21 | 94.132  | 37445 | 2 | 1124.61 | 10.32  |
| [P66738]RRF_SALTY Ribosome-recycling factor           | 4  |                    | AIMASDLGLNPSSAGTDIR                 | 80  | 19 | 4  | 34.55 | y9y10°y10y11                     | 1888.95 | 68.200  | 14805 | 2 | 944.98  | 4.91   |
| [P66738]RRF_SALTY Ribosome-recycling factor           | 5  |                    | AIMASDLGLNPSSAGTDIRVPLPPL TEER      | 80  | 29 | 7  | 35.39 | b4b7y4y6y12y21y22                | 3020.59 | 87.175  | 41512 | 3 | 1007.54 | 6.63   |
| [P66738]RRF_SALTY Ribosome-recycling factor           | 6  |                    | VDAALADKEAELMQF                     | 170 | 15 | 4  | 29.48 | b6b9b13y13                       | 1650.83 | 84.123  | 22689 | 3 | 550.95  | 14.72  |

|                                                      |    |                                             |                            |     |    |    |        |                                                 |         |         |        |   |         |        |
|------------------------------------------------------|----|---------------------------------------------|----------------------------|-----|----|----|--------|-------------------------------------------------|---------|---------|--------|---|---------|--------|
| P66738 RRF_SALTY Ribosome-recycling factor           | 7  | Oxidation+M(3)                              | AIMASDLGLNPSSAGTDIR        | 80  | 19 | 8  | 31.67  | b5b8y8°y8y9y13°y13*y13                          | 1904.95 | 67.641  | 10477  | 3 | 635.65  | 5.70   |
| P66738 RRF_SALTY Ribosome-recycling factor           | 8  | Oxidation+M(13)                             | VDAALADKEAELMQF            | 170 | 15 | 3  | 18.16  | b9y7y14                                         | 1666.81 | 77.853  | 3325   | 3 | 556.28  | 7.84   |
| Q7CPD8 YIFE_SALTY UPF0438 protein yifE               | 1  |                                             | HGHAFNDLDLGK               | 37  | 12 | 9  | 54.21  | b3b4y9°y9y10°y10y11*y11y12                      | 1323.66 | 56.135  | 12806  | 2 | 662.33  | 13.46  |
| Q7CPD8 YIFE_SALTY UPF0438 protein yifE               | 2  |                                             | MAESFTTTNR                 | 0   | 10 | 4  | 39.38  | b3b9y5y7                                        | 1157.51 | 43.180  | 1568   | 3 | 386.51  | -11.81 |
| Q7CPD8 YIFE_SALTY UPF0438 protein yifE               | 3  |                                             | EAQLLERHGHAFNDLDLGK        | 30  | 19 | 5  | 20.73  | b3b10°b10y10y14                                 | 2163.08 | 74.689  | 31532  | 3 | 721.70  | -6.77  |
| Q7CPD8 YIFE_SALTY UPF0438 protein yifE               | 4  |                                             | HGHAFNDLDLGKR              | 37  | 13 | 3  | 29.91  | y3y7y9                                          | 1479.75 | 37.143  | 3428   | 3 | 493.92  | 4.45   |
| Q7CPD8 YIFE_SALTY UPF0438 protein yifE               | 5  |                                             | AESFTTTNRYFDNK             | 1   | 14 | 4  | 38.56  | b3b4b5y6                                        | 1693.79 | 37.328  | 2180   | 3 | 565.27  | 6.99   |
| Q7CPD8 YIFE_SALTY UPF0438 protein yifE               | 6  |                                             | MAESFTTTNRYFDNK            | 0   | 15 | 5  | 29.48  | b10y4y8y9*y9                                    | 1824.81 | 92.847  | 1846   | 3 | 608.94  | -4.28  |
| Q9L9J1 THIG_SALTY Thiazole biosynthesis protein thiG | 1  | Carbamidomethyl+C(6)                        | LEEVGCAAVMPLGAPIGSNQGLE TK | 139 | 25 | 4  | 18.86  | b5b11b15y13                                     | 2541.24 | 123.823 | 3029   | 3 | 847.75  | -10.76 |
| Q9L9J1 THIG_SALTY Thiazole biosynthesis protein thiG | 2  | Carbamidomethyl+C(9); Carbamidomethyl+C(16) | QGFVVLPCYGADPVLCK          | 121 | 17 | 3  | 23.33  | b10b11y11                                       | 1922.93 | 92.248  | 1737   | 3 | 641.65  | -8.89  |
| Q9L9J1 THIG_SALTY Thiazole biosynthesis protein thiG | 3  |                                             | TFDSLHTGTGK                | 7   | 12 | 3  | 22.3   | b4b10y6                                         | 1310.62 | 48.864  | 28749  | 3 | 437.54  | -16.67 |
| Q9L9J1 THIG_SALTY Thiazole biosynthesis protein thiG | 4  | Carbamidomethyl+C(6); Oxidation+M(10)       | LEEVGCAAVMPLGAPIGSNQGLE TK | 139 | 25 | 5  | 27.44  | b3b6b11b13y8                                    | 2557.29 | 80.314  | 1721   | 3 | 853.10  | 9.07   |
| P0A2B3 RS7_SALTY 30S ribosomal protein S7            | 1  |                                             | STAESIVYSALETLAQR          | 36  | 17 | 12 | 65.2   | b2°b2b8y2y3y5y6°y6y7y9y11y17                    | 1838.96 | 107.007 | 43054  | 2 | 919.98  | 4.45   |
| P0A2B3 RS7_SALTY 30S ribosomal protein S7            | 2  |                                             | FVNILMVDGK                 | 25  | 10 | 6  | 41.71  | b2y2y3y5y8y10                                   | 1135.61 | 76.356  | 25102  | 2 | 568.31  | -7.85  |
| P0A2B3 RS7_SALTY 30S ribosomal protein S7            | 3  |                                             | VGGSTYQVPVEVRPVR           | 79  | 16 | 5  | 27.7   | b1b3b12b14y3                                    | 1742.98 | 76.956  | 17049  | 2 | 871.99  | 12.12  |
| P0A2B3 RS7_SALTY 30S ribosomal protein S7            | 4  |                                             | LANELSDAADNK               | 119 | 12 | 9  | 34.29  | b7b12°b12y3y4*y4y11°y11y12                      | 1260.63 | 65.150  | 8380   | 2 | 630.82  | 14.91  |
| P0A2B3 RS7_SALTY 30S ribosomal protein S7            | 5  |                                             | SELEAFEVALENVRPTVEVK       | 56  | 20 | 4  | 23.81  | b3°b3b4b11                                      | 2259.18 | 92.378  | 6355   | 2 | 1130.09 | -2.92  |
| P0A2B3 RS7_SALTY 30S ribosomal protein S7            | 6  |                                             | FGSELLAK                   | 17  | 8  | 4  | 49.36  | b5y3y4y7                                        | 864.47  | 52.046  | 51336  | 2 | 432.74  | -15.53 |
| P0A2B3 RS7_SALTY 30S ribosomal protein S7            | 7  |                                             | NALAMR                     | 96  | 6  | 1  | 13.63  | y5                                              | 675.36  | 36.616  | 5916   | 1 | 675.36  | -2.62  |
| P0A2B3 RS7_SALTY 30S ribosomal protein S7            | 8  |                                             | VIGQR                      | 5   | 5  | 1  | 13.23  | y4                                              | 572.34  | 33.434  | 2648   | 1 | 572.34  | -13.33 |
| P0A2B3 RS7_SALTY 30S ribosomal protein S7            | 9  |                                             | LANELSDAADNKGTAVK          | 119 | 17 | 18 | 196.05 | b5b7b8b9b10y5y7y8*y8y9y10°y10y11y12y13y14y15y16 | 1716.86 | 39.722  | 103375 | 3 | 572.96  | -12.16 |
| P0A2B3 RS7_SALTY 30S ribosomal protein S7            | 10 |                                             | RVGGSTYQVPVEVRPVR          | 78  | 17 | 7  | 64.27  | b6°b6b7b8b9y8y9                                 | 1899.04 | 49.703  | 41456  | 3 | 633.68  | -10.41 |
| P0A2B3 RS7_SALTY 30S ribosomal protein S7            | 11 |                                             | SGKSELEAFEVALENVRPTVEVK    | 53  | 23 | 3  | 13.06  | b7b9y3                                          | 2531.32 | 88.390  | 16984  | 3 | 844.44  | -7.04  |
| P0A2B3 RS7_SALTY 30S ribosomal protein S7            | 12 |                                             | NALAMRWIVEAAR              | 96  | 13 | 4  | 29.71  | b7b12y7y10                                      | 1500.80 | 72.299  | 14095  | 2 | 750.90  | -8.78  |
| P0A2B3 RS7_SALTY 30S ribosomal protein S7            | 13 |                                             | KSTAESIVYSALETLAQR         | 35  | 18 | 3  | 23     | b6b7y6                                          | 1967.02 | 98.642  | 9984   | 3 | 656.34  | -12.91 |
| P0A2B3 RS7_SALTY 30S ribosomal protein S7            | 14 |                                             | EDVHRMAEANK                | 138 | 11 | 5  | 38.35  | b3b5y5*y5y6                                     | 1299.62 | 73.631  | 8235   | 3 | 433.88  | 3.29   |
| P0A2B3 RS7_SALTY 30S ribosomal protein S7            | 15 |                                             | GDKSMALR                   | 111 | 8  | 3  | 48.68  | y3y5y7                                          | 877.45  | 28.992  | 4683   | 2 | 439.23  | -7.16  |
| Q9ZFU6 YPFL_SALTY Uncharacterized protein ypfL       | 1  |                                             | YAHQAGWELTENGR             | 214 | 14 | 7  | 33.05  | b1b7b8y2y7y11y14                                | 1631.77 | 47.368  | 8792   | 2 | 816.39  | 11.30  |



|                                                                  |    |                                            |                                      |     |    |   |       |                      |         |         |        |   |         |        |
|------------------------------------------------------------------|----|--------------------------------------------|--------------------------------------|-----|----|---|-------|----------------------|---------|---------|--------|---|---------|--------|
| Q9ZFU6 YPFL_SALTY Uncharacterized protein ypfL                   | 2  | Carbamidomethyl+C(11)                      | EHDPLIEWIPCPIPTDELYK                 | 71  | 20 | 4 | 14.39 | b11y7°y7y11          | 2465.20 | 97.952  | 3798   | 2 | 1233.10 | -4.16  |
| Q9ZFU6 YPFL_SALTY Uncharacterized protein ypfL                   | 3  |                                            | QEPPAWSASLHILPHR                     | 198 | 16 | 3 | 17.18 | b4b10y3              | 1838.93 | 36.888  | 94568  | 4 | 460.49  | -18.25 |
| Q9ZFU6 YPFL_SALTY Uncharacterized protein ypfL                   | 4  |                                            | DALLQK                               | 161 | 6  | 2 | 26.87 | b3y3                 | 687.40  | 44.567  | 17800  | 1 | 687.40  | -3.91  |
| Q9ZFU6 YPFL_SALTY Uncharacterized protein ypfL                   | 5  | Carbamidomethyl+C(5)                       | DGILCALAWIGDEVVVEHFN                 | 175 | 21 | 5 | 31.23 | b13y4y7y11y12        | 2413.23 | 88.518  | 5515   | 3 | 805.08  | 13.05  |
| Q9ZFU6 YPFL_SALTY Uncharacterized protein ypfL                   | 6  |                                            | QVINEEELELSSPLPFHR                   | 137 | 18 | 3 | 15.6  | b9b12y9              | 2137.14 | 73.342  | 3447   | 3 | 713.05  | 21.13  |
| Q9ZFU6 YPFL_SALTY Uncharacterized protein ypfL                   | 7  |                                            | TIDAFSGITNPVEMLK                     | 49  | 16 | 4 | 28.37 | b3b6b7y10            | 1735.87 | 101.920 | 1726   | 2 | 868.44  | -12.73 |
| Q9ZFU6 YPFL_SALTY Uncharacterized protein ypfL                   | 8  |                                            | YAHQAGWELTENGRR                      | 214 | 15 | 4 | 18.16 | b6y4y8°y8            | 1787.86 | 66.282  | 4727   | 2 | 894.43  | 2.73   |
| Q9ZFU6 YPFL_SALTY Uncharacterized protein ypfL                   | 9  | Carbamidomethyl+C(17)                      | LVHEPREHDPLIEWIPCPIPTDELYK           | 65  | 26 | 3 | 12.15 | b8y5y7               | 3196.57 | 90.541  | 4314   | 3 | 1066.20 | -12.53 |
| Q9ZFU6 YPFL_SALTY Uncharacterized protein ypfL                   | 10 | Carbamidomethyl+C(3); Carbamidomethyl+C(8) | IPCKNPQCSHFILPATAAR                  | 4   | 19 | 3 | 22.74 | b8y13y14             | 2181.10 | 78.493  | 3239   | 3 | 727.70  | -2.69  |
| P40783 QOR_SALTY Quinone oxidoreductase                          | 1  |                                            | AIGINFIDTYIR                         | 36  | 12 | 8 | 34.29 | b2b3y2y5y6y10y12*y12 | 1395.76 | 88.476  | 34444  | 3 | 465.92  | -4.20  |
| P40783 QOR_SALTY Quinone oxidoreductase                          | 2  |                                            | GLMVSFGNASGPVTGVNLGILNQK             | 232 | 24 | 6 | 36.78 | b10*b10b12b13b14y24  | 2373.26 | 79.208  | 17498  | 3 | 791.76  | 1.13   |
| P40783 QOR_SALTY Quinone oxidoreductase                          | 3  |                                            | AAILPDAISFEQAAASFLK                  | 105 | 19 | 4 | 22.74 | b11b12y2y9           | 1963.03 | 103.639 | 4841   | 2 | 982.02  | -10.07 |
| P40783 QOR_SALTY Quinone oxidoreductase                          | 4  | Carbamidomethyl+C(9)                       | DTWEASLDCLQR                         | 219 | 12 | 3 | 29.51 | y5y6y8               | 1493.66 | 72.087  | 1857   | 3 | 498.56  | -8.09  |
| P40783 QOR_SALTY Quinone oxidoreductase                          | 5  |                                            | ALDAGAWQVINYR                        | 180 | 13 | 3 | 20.67 | b5b8y7               | 1476.73 | 54.055  | 7845   | 2 | 738.87  | -20.09 |
| P40783 QOR_SALTY Quinone oxidoreductase                          | 6  |                                            | VVYAQSTLGAYSSVHNVTADK                | 84  | 21 | 5 | 29.8  | b7b12y7y8y15         | 2210.07 | 88.936  | 4464   | 4 | 553.27  | -16.57 |
| P40783 QOR_SALTY Quinone oxidoreductase                          | 7  |                                            | HGGPEVLQTVFTPAEPAEHEIQVENK           | 9   | 27 | 4 | 11.92 | b4y12*y12y14         | 2985.47 | 67.287  | 2547   | 3 | 995.83  | 3.27   |
| P40783 QOR_SALTY Quinone oxidoreductase                          | 8  |                                            | ALDAGAWQVINYREESIVER                 | 180 | 20 | 3 | 14.39 | b4b8y7               | 2319.21 | 85.453  | 2619   | 2 | 1160.11 | 14.63  |
| P40783 QOR_SALTY Quinone oxidoreductase                          | 9  | Phosphoryl STY(12)                         | ALDAGAWQVINYREESIVER                 | 180 | 20 | 3 | 14.39 | b9b11y7              | 2399.11 | 99.541  | 122464 | 3 | 800.38  | -6.92  |
| P40783 QOR_SALTY Quinone oxidoreductase                          | 10 | Phosphoryl STY(13)                         | VVYAQSTLGAYSSVHNVTADK                | 84  | 21 | 4 | 13.89 | b5y7°y7y9            | 2290.07 | 78.403  | 19602  | 3 | 764.03  | 1.92   |
| P40783 QOR_SALTY Quinone oxidoreductase                          | 11 | Phosphoryl STY(6)                          | GLTVFYLLR                            | 124 | 9  | 3 | 30.51 | b4b6_H3PO4 b6y5      | 1161.58 | 31.600  | 2212   | 2 | 581.30  | -12.30 |
| P40783 QOR_SALTY Quinone oxidoreductase                          | 12 |                                            | GINFIDTYIR                           | 38  | 10 | 1 | 7.6   | b5                   | 1211.65 | 88.480  | 16050  | 2 | 606.33  | 5.74   |
| P41784 PRGI_SALTY Protein prgI                                   | 1  |                                            | FDTGVDNLQTQVTEALDK                   | 15  | 18 | 6 | 40.72 | b11b15b16*b16b17y9   | 1993.96 | 74.679  | 26484  | 3 | 665.33  | -3.80  |
| P41784 PRGI_SALTY Protein prgI                                   | 2  |                                            | DIDAAIQNFR                           | 69  | 11 | 5 | 31.32 | b6b7°b7b10*b10       | 1275.68 | 75.338  | 4368   | 2 | 638.34  | 7.66   |
| P41784 PRGI_SALTY Protein prgI                                   | 3  |                                            | MATPWSGYLDDVSAK                      | 0   | 15 | 3 | 18.16 | b10b12y8             | 1640.79 | 69.415  | 15090  | 2 | 820.90  | 18.67  |
| P41784 PRGI_SALTY Protein prgI                                   | 4  |                                            | ATPWSGYLDDVSAK                       | 1   | 14 | 3 | 24.75 | b10y10y11            | 1509.73 | 89.977  | 14425  | 2 | 755.37  | 1.94   |
| P41784 PRGI_SALTY Protein prgI                                   | 5  |                                            | LSEYNLYR                             | 50  | 8  | 6 | 54.13 | b4b6y4*y4y7*y7       | 1057.52 | 30.887  | 1670   | 3 | 353.18  | -11.31 |
| P41784 PRGI_SALTY Protein prgI                                   | 6  |                                            | FDTGVDNLQTQVTEALDKLAACP SDPALLAAYQSK | 15  | 35 | 4 | 10.93 | b12b15y16°y16        | 3718.93 | 136.660 | 4147   | 3 | 1240.32 | 4.60   |
| P41784 PRGI_SALTY Protein prgI                                   | 7  |                                            | LAAKPSDPALLAAYQSKLSEYNLYR            | 33  | 25 | 7 | 28.11 | b3y4y5y8°y8*y8y12    | 2782.45 | 136.217 | 2266   | 3 | 928.15  | -10.70 |
| P41784 PRGI_SALTY Protein prgI                                   | 8  | Oxidation+M(1)                             | MATPWSGYLDDVSAK                      | 0   | 15 | 3 | 18.16 | b14y10y12            | 1656.74 | 80.035  | 9114   | 3 | 552.92  | -11.86 |
| P15717 LEUC1_SALTY 3-isopropylmalate dehydratase large subunit 1 | 1  |                                            | THLVSPAMAAAAAVTGHFADIR               | 441 | 22 | 4 | 18.2  | b3b13y7y17           | 2207.11 | 85.787  | 23353  | 3 | 736.38  | -12.28 |
| P15717 LEUC1_SALTY 3-isopropylmalate dehydratase large subunit 1 | 2  |                                            | AGLVAPDETTFNYYVK                     | 229 | 15 | 5 | 37.93 | b3y10y11y12y15       | 1624.84 | 66.397  | 16860  | 2 | 812.92  | 8.94   |

|                                                                     |    |                                               |                                        |     |    |   |       |                       |         |         |       |   |         |        |
|---------------------------------------------------------------------|----|-----------------------------------------------|----------------------------------------|-----|----|---|-------|-----------------------|---------|---------|-------|---|---------|--------|
| P15717 LEUC1_SALTY 3-isopropylmalate dehydratase large subunit 1    | 3  | Carbamidomethyl+C(14)                         | TGSAGGTGHVVEFCGDAIR                    | 190 | 19 | 5 | 31.62 | y3y8y9y18y19          | 1890.87 | 51.654  | 14681 | 3 | 630.96  | -2.78  |
| P15717 LEUC1_SALTY 3-isopropylmalate dehydratase large subunit 1    | 4  | Carbamidomethyl+C(4)                          | MTLCNMAIEMGAK                          | 216 | 13 | 5 | 20.67 | b8°b8y3y5°y5          | 1469.68 | 72.311  | 8988  | 2 | 735.34  | 8.97   |
| P15717 LEUC1_SALTY 3-isopropylmalate dehydratase large subunit 1    | 5  |                                               | AQAEAEGLDK                             | 383 | 10 | 9 | 60.39 | b4*b4b7°b7b9y2°y2y7y9 | 1031.51 | 32.541  | 7121  | 2 | 516.26  | 6.04   |
| P15717 LEUC1_SALTY 3-isopropylmalate dehydratase large subunit 1    | 6  |                                               | HLVHEVTSPQAFDGLR                       | 29  | 16 | 6 | 24.3  | b12°b12b14y4°y4y12    | 1805.95 | 84.243  | 15322 | 4 | 452.24  | 9.26   |
| P15717 LEUC1_SALTY 3-isopropylmalate dehydratase large subunit 1    | 7  |                                               | IQMQELIK                               | 80  | 8  | 3 | 33.12 | b4b5y6                | 1002.56 | 60.211  | 8621  | 2 | 501.78  | -5.72  |
| P15717 LEUC1_SALTY 3-isopropylmalate dehydratase large subunit 1    | 8  |                                               | LFDAHVVFEAPNETPLLYIDR                  | 8   | 21 | 4 | 37.45 | b3b4b5b10             | 2459.22 | 96.834  | 4453  | 3 | 820.41  | -15.69 |
| P15717 LEUC1_SALTY 3-isopropylmalate dehydratase large subunit 1    | 9  |                                               | IEDLR                                  | 351 | 5  | 1 | 13.23 | b4                    | 645.36  | 31.467  | 1595  | 2 | 323.18  | 6.15   |
| P15717 LEUC1_SALTY 3-isopropylmalate dehydratase large subunit 1    | 10 | Carbamidomethyl+C(26)                         | ALAYMGLQPGVPLTDVAIDKVFI<br>GSCTNSR     | 321 | 30 | 6 | 37.02 | b5b6y4y8y11y22        | 3193.65 | 96.133  | 7571  | 3 | 1065.22 | 4.59   |
| P15717 LEUC1_SALTY 3-isopropylmalate dehydratase large subunit 1    | 11 | Carbamidomethyl+C(4);<br>Carbamidomethyl+C(7) | LPGCSMCLAMNNDRLNPGER                   | 403 | 20 | 3 | 14.39 | b3y4y9                | 2305.04 | 60.143  | 7048  | 3 | 769.02  | 3.07   |
| P15717 LEUC1_SALTY 3-isopropylmalate dehydratase large subunit 1    | 12 |                                               | GGRTHLVSPMAAAAAVTGHFA<br>DIR           | 438 | 25 | 4 | 23.12 | b11y3y6y7             | 2477.30 | 94.754  | 4153  | 3 | 826.44  | 5.72   |
| P15717 LEUC1_SALTY 3-isopropylmalate dehydratase large subunit 1    | 13 | Carbamidomethyl+C(11)                         | ALSMGRMTLCNMAIEMGAK                    | 209 | 20 | 4 | 36.05 | b6b7y6y7              | 2214.03 | 116.148 | 2695  | 3 | 738.68  | 6.18   |
| Q8ZNA5 FADL_SALTY Long-chain fatty acid tranort protein             | 1  |                                               | NPALITMFD RPTFSAGAVYIDPDV<br>NISGTSPSR | 57  | 33 | 4 | 11.06 | b3b16y16y33           | 3509.77 | 108.273 | 28045 | 4 | 878.20  | 8.07   |
| Q8ZNA5 FADL_SALTY Long-chain fatty acid tranort protein             | 2  |                                               | FAGDLGQLVAAQN PALAPVAGQI<br>PSDTK      | 182 | 28 | 4 | 11.71 | b6y9y22y28            | 2749.45 | 85.969  | 16139 | 3 | 917.15  | -1.69  |
| Q8ZNA5 FADL_SALTY Long-chain fatty acid tranort protein             | 3  |                                               | LNEAWSFGLGFD AVYAR                     | 160 | 17 | 6 | 39.19 | b4*b4b5b6°b6b10       | 1915.93 | 98.425  | 4017  | 3 | 639.31  | -2.93  |
| Q8ZNA5 FADL_SALTY Long-chain fatty acid tranort protein             | 4  |                                               | TGIAFDDSPVPAQNR                        | 356 | 15 | 5 | 29.48 | b12y5y6°y6y10         | 1587.77 | 47.280  | 3064  | 2 | 794.39  | -1.61  |
| Q8ZNA5 FADL_SALTY Long-chain fatty acid tranort protein             | 5  |                                               | FWLSAGTTYAFNKDASVDVGVSY<br>MHGQSVK     | 380 | 30 | 3 | 11.39 | b14y8y10              | 3265.56 | 84.420  | 1982  | 3 | 1089.19 | -0.22  |
| Q8ZNA5 FADL_SALTY Long-chain fatty acid tranort protein             | 6  |                                               | FWLSAGTTYAFNK                          | 380 | 13 | 3 | 29.91 | y4y6y10               | 1505.76 | 67.954  | 11569 | 3 | 502.59  | 9.49   |
| Q8ZNA5 FADL_SALTY Long-chain fatty acid tranort protein             | 7  |                                               | INEGPYQFESEGK                          | 410 | 13 | 3 | 20.67 | b7y5y10               | 1497.68 | 41.370  | 7150  | 2 | 749.34  | -6.36  |
| Q8ZNA5 FADL_SALTY Long-chain fatty acid tranort protein             | 8  |                                               | AYSGEAIA DDAGNVSR                      | 40  | 17 | 3 | 16.34 | b4b9y7                | 1652.75 | 30.837  | 5703  | 3 | 551.59  | 0.30   |
| Q8ZNA5 FADL_SALTY Long-chain fatty acid tranort protein             | 9  |                                               | SISIPDQDRFWLSAGTTYAFNK                 | 371 | 22 | 6 | 34.39 | b11b12y5y9°y9y11      | 2517.22 | 102.420 | 6960  | 3 | 839.75  | -8.15  |
| P14146 PHOP_SALTY Virulence transcriptional regulatory protein phoP | 1  |                                               | RELSVNEEVIK                            | 139 | 11 | 7 | 24.33 | b6b9°b9b11y1y2y10     | 1315.71 | 57.432  | 40222 | 2 | 658.36  | -10.86 |
| P14146 PHOP_SALTY Virulence transcriptional regulatory protein phoP | 2  |                                               | VLVVEDNALLR                            | 3   | 11 | 6 | 56.02 | b2b3y6y7y8y9          | 1240.72 | 68.284  | 17106 | 2 | 620.86  | -6.10  |

|                                                                     |    |                      |                                |     |    |    |       |                                   |         |         |       |   |         |        |
|---------------------------------------------------------------------|----|----------------------|--------------------------------|-----|----|----|-------|-----------------------------------|---------|---------|-------|---|---------|--------|
| P14146 PHOP_SALTY Virulence transcriptional regulatory protein phoP | 3  |                      | SSDVSLPVLVLTAR                 | 68  | 14 | 5  | 27.61 | b3°b3b6y4y8                       | 1456.84 | 87.484  | 16724 | 2 | 728.92  | 1.26   |
| P14146 PHOP_SALTY Virulence transcriptional regulatory protein phoP | 4  |                      | NSGLASQVINIPPFQVDLSR           | 119 | 20 | 6  | 23.81 | b2b5°b5b7b8*b8                    | 2155.15 | 103.973 | 3005  | 3 | 719.05  | -2.15  |
| P14146 PHOP_SALTY Virulence transcriptional regulatory protein phoP | 5  |                      | LTAFEYTIMETLIR                 | 150 | 14 | 4  | 27.61 | b9b11y6y11                        | 1700.87 | 108.362 | 1935  | 3 | 567.63  | -14.57 |
| P14146 PHOP_SALTY Virulence transcriptional regulatory protein phoP | 6  |                      | VQLQDSGHQVDAEDAR               | 18  | 17 | 5  | 27.43 | b8*b8y4y5y8                       | 1838.84 | 27.732  | 53701 | 3 | 613.62  | -13.81 |
| P14146 PHOP_SALTY Virulence transcriptional regulatory protein phoP | 7  |                      | IQAQYPHDVITTVR                 | 201 | 14 | 5  | 30.78 | b6y9y10y12*y12                    | 1640.85 | 52.085  | 23926 | 3 | 547.62  | -15.62 |
| P14146 PHOP_SALTY Virulence transcriptional regulatory protein phoP | 8  |                      | DSLMLQLYPDAELR                 | 172 | 14 | 6  | 27.61 | b3°b3b11°b11y5y8                  | 1663.81 | 67.669  | 3695  | 3 | 555.27  | -17.61 |
| P14146 PHOP_SALTY Virulence transcriptional regulatory protein phoP | 9  |                      | ESHTIDVLMGR                    | 186 | 11 | 3  | 24.33 | b4b9y8                            | 1257.64 | 43.696  | 3486  | 2 | 629.32  | 8.93   |
| P14146 PHOP_SALTY Virulence transcriptional regulatory protein phoP | 10 |                      | VEVLSSGADDYVTKPFHIEEVMAR       | 88  | 24 | 5  | 37.23 | b12b13b14b22y7                    | 2692.35 | 92.337  | 2439  | 3 | 898.12  | 7.80   |
| P14146 PHOP_SALTY Virulence transcriptional regulatory protein phoP | 11 |                      | EGWQDKVEVLSSGADDYVTKPFHIEEVMAR | 82  | 30 | 6  | 28.41 | b4b7y6y7y10y12                    | 3435.64 | 84.609  | 30516 | 4 | 859.67  | -3.91  |
| P14146 PHOP_SALTY Virulence transcriptional regulatory protein phoP | 12 |                      | HHLKVQLQDSGHQVDAEDAR           | 14  | 21 | 3  | 13.89 | b6y5y8                            | 2354.15 | 114.296 | 5086  | 3 | 785.39  | -6.02  |
| P14146 PHOP_SALTY Virulence transcriptional regulatory protein phoP | 13 |                      | ELSVNEEVIKLTAFEYTIMETLIR       | 140 | 24 | 3  | 12.72 | b9y4y12                           | 2841.47 | 67.023  | 3932  | 3 | 947.83  | -7.39  |
| P14146 PHOP_SALTY Virulence transcriptional regulatory protein phoP | 14 | Phosphoryl STY(12)   | VVSKDSLMLQLYPDAELR             | 168 | 18 | 3  | 24.52 | y5y6y9                            | 2157.07 | 55.613  | 1612  | 3 | 719.69  | 6.00   |
| P14146 PHOP_SALTY Virulence transcriptional regulatory protein phoP | 15 | Oxidation+M(4)       | DSLMLQLYPDAELR                 | 172 | 14 | 11 | 62.22 | b7b8°b8b10°b10*b10b11*b11y9*y9y10 | 1679.83 | 68.566  | 2055  | 3 | 560.61  | -1.45  |
| P58663 RCSB_SALTY Capsular synthesis regulator component B          | 1  |                      | LGVENDIALLNYSVTLSPTDKE         | 192 | 24 | 8  | 42.91 | b4y2y3y7y8y9y11y24                | 2591.35 | 109.888 | 8018  | 2 | 1296.18 | 2.07   |
| P58663 RCSB_SALTY Capsular synthesis regulator component B          | 2  |                      | LGVENDIALLNYSVTLSPTDK          | 192 | 23 | 5  | 20.15 | b1b3b6b11y4                       | 2462.28 | 85.526  | 3292  | 4 | 616.33  | -8.92  |
| P58663 RCSB_SALTY Capsular synthesis regulator component B          | 3  |                      | LDAHVLITDLSMPGDK               | 47  | 16 | 4  | 42.89 | b3b4b11b12                        | 1724.86 | 90.643  | 9324  | 3 | 575.62  | -18.82 |
| P58663 RCSB_SALTY Capsular synthesis regulator component B          | 4  |                      | ESEVLR                         | 154 | 6  | 1  | 13.63 | b4                                | 732.38  | 106.491 | 3649  | 1 | 732.38  | -12.25 |
| P58663 RCSB_SALTY Capsular synthesis regulator component B          | 5  |                      | SLEQIEWVNVVGEFEDSTALINNL PK    | 21  | 26 | 3  | 22.82 | b6b8b9                            | 2944.52 | 69.077  | 2473  | 4 | 736.89  | 9.45   |
| P58663 RCSB_SALTY Capsular synthesis regulator component B          | 6  |                      | ISAGGYGDK                      | 140 | 9  | 4  | 30.51 | b6°b6y6y8                         | 867.42  | 91.342  | 1908  | 1 | 867.42  | -2.04  |
| P58663 RCSB_SALTY Capsular synthesis regulator component B          | 7  |                      | SAMMKLGVENDIALLNYSVTLSPTDK     | 187 | 28 | 10 | 40.8  | b8°b8b9b10°b10*b10b21°b21*b21b26  | 3010.54 | 115.106 | 30175 | 3 | 1004.19 | -1.87  |
| P0A8B8 YBAB_SALTY UPF0133 protein ybaB                              | 1  | Carbamidomethyl+C(9) | VTINGAHNCR                     | 43  | 10 | 10 | 68.17 | b2°b2y2y3y4y6y7*y7y8y10           | 1141.55 | 21.199  | 5590  | 2 | 571.28  | 0.53   |
| P0A8B8 YBAB_SALTY UPF0133 protein ybaB                              | 2  |                      | VEIDPSLLEDDKEMLEDLVAAAFNDAAR   | 54  | 28 | 6  | 17.73 | b2y5y8y10°y10*y10                 | 3089.50 | 127.621 | 4728  | 3 | 1030.51 | 2.05   |
| P0A8B8 YBAB_SALTY UPF0133 protein ybaB                              | 3  |                      | MQEEIAQLEVTGESGAGLVK           | 23  | 20 | 4  | 19.79 | b11b18y13y15                      | 2089.06 | 83.846  | 3678  | 3 | 697.03  | 8.06   |

|                                               |    |                                             |                                 |     |    |    |       |                               |         |         |        |   |         |        |
|-----------------------------------------------|----|---------------------------------------------|---------------------------------|-----|----|----|-------|-------------------------------|---------|---------|--------|---|---------|--------|
| [P0A8B8 YBAB_SALTY UPF0133 protein ybaB       | 4  |                                             | MASVSSGMQLPPGFK                 | 91  | 15 | 6  | 37.14 | b5b12y11y12y14*y14            | 1536.78 | 91.309  | 1941   | 2 | 768.89  | 15.25  |
| [P0A8B8 YBAB_SALTY UPF0133 protein ybaB       | 5  |                                             | IEETQK                          | 83  | 6  | 2  | 29.88 | b3b5                          | 747.38  | 41.957  | 1545   | 1 | 747.38  | -6.29  |
| [P0A8B8 YBAB_SALTY UPF0133 protein ybaB       | 6  |                                             | MASVSSGMQLPPGFKMPF              | 91  | 18 | 6  | 34.7  | b10*b10y3y5y6y8               | 1911.90 | 53.127  | 16357  | 3 | 637.97  | -8.62  |
| [P0A8B8 YBAB_SALTY UPF0133 protein ybaB       | 7  |                                             | GGLGNLMKQAQQMQEK                | 4   | 16 | 5  | 28.37 | b4y5y10*y10y11                | 1760.90 | 73.662  | 6849   | 2 | 880.95  | 10.61  |
| [P0A8B8 YBAB_SALTY UPF0133 protein ybaB       | 8  | Carbamidomethyl+C(29)                       | MQEEIAQLEVTGESGAGLVKVTIN GAHNCR | 23  | 30 | 3  | 11.39 | b8b23y8                       | 3211.60 | 110.031 | 6775   | 4 | 803.66  | 6.23   |
| [P0A8B8 YBAB_SALTY UPF0133 protein ybaB       | 9  |                                             | QAQQMQEKMQK                     | 12  | 11 | 3  | 24.33 | b4y3y6                        | 1377.65 | 29.646  | 1703   | 2 | 689.33  | -8.51  |
| [P0A8B8 YBAB_SALTY UPF0133 protein ybaB       | 10 | Oxidation+M(2)                              | EMLEDLVAAAFNDAARR               | 66  | 17 | 3  | 23.33 | b9b10y9                       | 1907.93 | 73.646  | 143977 | 3 | 636.65  | 2.37   |
| [P0A8B8 YBAB_SALTY UPF0133 protein ybaB       | 11 | Carbamidomethyl+C(8)                        | TINGAHNCR                       | 44  | 9  | 1  | 8.26  | b7                            | 1042.48 | 21.185  | 3848   | 2 | 521.74  | -6.79  |
| [P0A8B8 YBAB_SALTY UPF0133 protein ybaB       | 12 | Carbamidomethyl+C(7)                        | INGAHNCR                        | 45  | 8  | 0  | 2.02  |                               | 941.43  | 21.175  | 2895   | 2 | 471.22  | -3.50  |
| [P40720 FUMA_SALTY Fumarate hydratase class I | 1  |                                             | SNKPFFYQDPFPLK                  | 1   | 14 | 8  | 27.09 | b1b5°b5b6°b6b11°b11y14        | 1727.89 | 59.205  | 90740  | 3 | 576.63  | 5.58   |
| [P40720 FUMA_SALTY Fumarate hydratase class I | 2  |                                             | MSNKPFFYQDPFPLK                 | 0   | 15 | 4  | 26.24 | y6y9y10y15                    | 1858.90 | 75.902  | 15785  | 2 | 929.95  | -10.51 |
| [P40720 FUMA_SALTY Fumarate hydratase class I | 3  |                                             | VAPEALTLLAR                     | 41  | 11 | 3  | 24.33 | b4y7y9                        | 1153.69 | 73.626  | 14235  | 2 | 577.35  | -6.03  |
| [P40720 FUMA_SALTY Fumarate hydratase class I | 4  |                                             | VWTGGGDEAALAR                   | 120 | 13 | 3  | 20.67 | b12y6y11                      | 1302.64 | 48.719  | 9557   | 2 | 651.82  | -1.87  |
| [P40720 FUMA_SALTY Fumarate hydratase class I | 5  |                                             | EVNTGTNLPAQIDLYSVDGDEYK         | 156 | 23 | 4  | 17.51 | b3b6y3y12                     | 2541.23 | 88.667  | 6936   | 2 | 1271.12 | 13.83  |
| [P40720 FUMA_SALTY Fumarate hydratase class I | 6  |                                             | TYLYQETK                        | 192 | 8  | 3  | 40.9  | y4y6y7                        | 1045.52 | 39.845  | 6761   | 2 | 523.26  | -4.32  |
| [P40720 FUMA_SALTY Fumarate hydratase class I | 7  | Carbamidomethyl+C(5); Carbamidomethyl+C(13) | HGASCPVGMGVSCSADR               | 305 | 17 | 6  | 36.97 | b2b7y8y9y10y17                | 1747.72 | 37.049  | 6195   | 3 | 583.25  | -5.24  |
| [P40720 FUMA_SALTY Fumarate hydratase class I | 8  |                                             | DHPIYYAGPAK                     | 415 | 11 | 6  | 27.34 | b2b3b4°b4y7y11                | 1231.60 | 26.298  | 3568   | 3 | 411.20  | -12.39 |
| [P40720 FUMA_SALTY Fumarate hydratase class I | 9  |                                             | GVYNTYIEDNLR                    | 133 | 12 | 7  | 32.23 | b4b9°b9b12y7°y7y9             | 1456.72 | 78.428  | 3166   | 3 | 486.24  | 8.38   |
| [P40720 FUMA_SALTY Fumarate hydratase class I | 10 |                                             | DDTEYYLLTSEHVSVAEFEGQEIL K      | 16  | 25 | 3  | 21.96 | b10b11y11                     | 2915.40 | 86.274  | 3062   | 4 | 729.61  | 5.19   |
| [P40720 FUMA_SALTY Fumarate hydratase class I | 11 |                                             | YYDALPTEGNEHGQAFR               | 251 | 17 | 4  | 27.43 | b6y6y12y13                    | 1967.87 | 92.691  | 25473  | 3 | 656.63  | -7.01  |
| [P40720 FUMA_SALTY Fumarate hydratase class I | 12 |                                             | IEVEDFPFILVDDK                  | 515 | 15 | 6  | 43.16 | b3b4b8y3°y3y4                 | 1749.91 | 59.216  | 9054   | 2 | 875.46  | 8.79   |
| [P40720 FUMA_SALTY Fumarate hydratase class I | 13 | Carbamidomethyl+C(13)                       | GNDFFQIQSSQCGAALS NVAAL R       | 530 | 24 | 3  | 12.72 | b3b15y15                      | 2582.27 | 97.644  | 8258   | 4 | 646.32  | 9.64   |
| [P40720 FUMA_SALTY Fumarate hydratase class I | 14 | Carbamidomethyl+C(7)                        | TLGTAACPPYHIAFVIGGTSAEAN LK     | 217 | 26 | 7  | 21.97 | b7b10°b10b13°b13y11y24        | 2659.31 | 114.589 | 7102   | 3 | 887.11  | -15.15 |
| [P40720 FUMA_SALTY Fumarate hydratase class I | 15 | Carbamidomethyl+C(3)                        | LECVEYPELGMEAIWK                | 499 | 16 | 3  | 25.56 | y6y7y9                        | 1966.95 | 112.466 | 3008   | 3 | 656.32  | 12.91  |
| [P40720 FUMA_SALTY Fumarate hydratase class I | 16 |                                             | DIELEK                          | 268 | 6  | 1  | 13.63 | b5                            | 746.40  | 35.780  | 2807   | 1 | 746.40  | 7.69   |
| [P40720 FUMA_SALTY Fumarate hydratase class I | 17 |                                             | VDLNRPMSEILQQLSQYPVSTR          | 360 | 22 | 4  | 13.45 | b3b6y9*y9                     | 2574.35 | 88.523  | 2294   | 3 | 858.79  | 4.55   |
| [P40720 FUMA_SALTY Fumarate hydratase class I | 18 |                                             | YSQNAALDMYK                     | 145 | 11 | 3  | 36.09 | y4y6y10                       | 1303.62 | 60.169  | 2235   | 2 | 652.32  | 18.92  |
| [P40720 FUMA_SALTY Fumarate hydratase class I | 19 |                                             | TPEGYASGSLGPTTAGR               | 426 | 17 | 5  | 22.96 | b3°b3b11y7y15                 | 1621.81 | 88.744  | 1529   | 2 | 811.41  | 14.53  |
| [P40720 FUMA_SALTY Fumarate hydratase class I | 20 |                                             | VWTGGGDEAALARGVYNTYIED NLR      | 120 | 25 | 10 | 33.48 | b7°b7b11b15°b15y7y8*y8y11°y11 | 2740.33 | 94.481  | 76526  | 3 | 914.12  | 0.09   |

|                                                               |    |                       |                                        |     |    |   |       |                                 |         |         |       |   |         |        |
|---------------------------------------------------------------|----|-----------------------|----------------------------------------|-----|----|---|-------|---------------------------------|---------|---------|-------|---|---------|--------|
| P40720 FUMA_SALTY Fumarate hydratase class I                  | 21 |                       | GGNMIRYFAGER                           | 554 | 12 | 3 | 32.52 | y3y6y11                         | 1370.68 | 62.757  | 74668 | 3 | 457.56  | 11.40  |
| P40720 FUMA_SALTY Fumarate hydratase class I                  | 22 |                       | DHPIIYAGPAKTPEGYASGSLGPT TAGR          | 415 | 28 | 6 | 24.96 | b9y7y11°y11y15y17               | 2834.40 | 92.802  | 20747 | 3 | 945.47  | 10.42  |
| P40720 FUMA_SALTY Fumarate hydratase class I                  | 23 |                       | YIPEALRQAGEGEAVR                       | 344 | 16 | 7 | 37.92 | b8*b8b9b12*b12b14y7             | 1758.90 | 67.136  | 18622 | 2 | 879.95  | -8.81  |
| P40720 FUMA_SALTY Fumarate hydratase class I                  | 24 | Carbamidomethyl+C(26) | EVNTGTNLP AQIDLYSVDGDEYK FLCIAK        | 156 | 29 | 5 | 14.54 | b10°b10b16y10y12                | 3273.61 | 104.314 | 6646  | 3 | 1091.87 | 2.39   |
| P40720 FUMA_SALTY Fumarate hydratase class I                  | 25 | Carbamidomethyl+C(11) | GNRSQQVTDACK                           | 463 | 12 | 4 | 32.52 | b3b7b10°b10                     | 1363.64 | 99.076  | 2532  | 2 | 682.33  | 3.67   |
| P40720 FUMA_SALTY Fumarate hydratase class I                  | 26 |                       | KDDTEYYLLTSEHVSVAEFEGQEI LK            | 15  | 26 | 4 | 12.15 | b9°b9y8y10                      | 3043.47 | 65.311  | 2333  | 4 | 761.62  | -3.05  |
| P40720 FUMA_SALTY Fumarate hydratase class I                  | 27 | Carbamidomethyl+C(4)  | RLECVEYPELGMEAIWK                      | 498 | 17 | 4 | 36.97 | b6b7b8y10                       | 2123.02 | 55.598  | 2171  | 4 | 531.51  | -2.64  |
| P40720 FUMA_SALTY Fumarate hydratase class I                  | 28 |                       | TPEGYASGSLGPTTAGRMDSYVD QLQSQGGSMIMLAK | 426 | 37 | 9 | 22.99 | b3b13y10°y10y12°y12*y12 y13*y13 | 3804.77 | 106.008 | 1859  | 4 | 951.95  | -4.30  |
| P40720 FUMA_SALTY Fumarate hydratase class I                  | 29 | Phosphoryl STY(6)     | GVYNTYIEDNLR                           | 133 | 12 | 3 | 26.28 | b4b5y5                          | 1536.65 | 43.868  | 2005  | 3 | 512.89  | -9.69  |
| P40720 FUMA_SALTY Fumarate hydratase class I                  | 30 | Oxidation+M(9)        | YSQNAALDMYK                            | 145 | 11 | 4 | 27.34 | b8y7°y7y8                       | 1319.61 | 64.418  | 3163  | 2 | 660.31  | 9.34   |
| Q8ZRP0 YAET_SALTY Outer membrane protein assembly factor yaeT | 1  |                       | VLRDGNTLLVQVK                          | 76  | 13 | 4 | 20.67 | b6y3y11y13                      | 1454.86 | 64.439  | 16351 | 2 | 727.93  | -8.56  |
| Q8ZRP0 YAET_SALTY Outer membrane protein assembly factor yaeT | 2  |                       | VAVGAALLSMPVR                          | 36  | 13 | 5 | 32.35 | b3y5°y5y6y11                    | 1283.75 | 77.664  | 13418 | 2 | 642.38  | -3.99  |
| Q8ZRP0 YAET_SALTY Outer membrane protein assembly factor yaeT | 3  |                       | QMEGAWLGSDLVDQGKER                     | 370 | 18 | 7 | 15.6  | b12b18y6°y6*y6y11°y11           | 2018.94 | 68.579  | 11973 | 3 | 673.65  | -10.64 |
| Q8ZRP0 YAET_SALTY Outer membrane protein assembly factor yaeT | 4  |                       | DEVPWWNVVGDRK                          | 200 | 13 | 4 | 25.44 | b4b5°b5y7                       | 1599.78 | 62.747  | 6431  | 2 | 800.39  | -5.88  |
| Q8ZRP0 YAET_SALTY Outer membrane protein assembly factor yaeT | 5  |                       | LSNMQPQIAMDR                           | 535 | 12 | 6 | 29.51 | b2°b2y5y7y8y12                  | 1403.68 | 51.829  | 6242  | 2 | 702.35  | 4.17   |
| Q8ZRP0 YAET_SALTY Outer membrane protein assembly factor yaeT | 6  |                       | IFYNDFQADDADLSDYTNK                    | 488 | 19 | 4 | 14.96 | b2b7y7y12                       | 2255.01 | 72.877  | 5443  | 2 | 1128.01 | 14.29  |
| Q8ZRP0 YAET_SALTY Outer membrane protein assembly factor yaeT | 7  |                       | LSGVQVSGNLAGHSAEIENLTK                 | 267 | 22 | 7 | 30.32 | b3°b3b5b10b11y2y5               | 2224.13 | 63.280  | 4497  | 3 | 742.05  | -9.88  |
| Q8ZRP0 YAET_SALTY Outer membrane protein assembly factor yaeT | 8  |                       | VPGSPDQVDVVYK                          | 404 | 13 | 7 | 53.15 | b2b8b9y2y8y9y10                 | 1402.73 | 65.288  | 4352  | 3 | 468.25  | 9.49   |
| Q8ZRP0 YAET_SALTY Outer membrane protein assembly factor yaeT | 9  |                       | DIHFEGLQR                              | 27  | 9  | 5 | 30.51 | b7y4y7y9*y9                     | 1114.56 | 53.208  | 3873  | 2 | 557.78  | -1.75  |
| Q8ZRP0 YAET_SALTY Outer membrane protein assembly factor yaeT | 10 |                       | FNIDSTQVSLTPDKK                        | 237 | 15 | 4 | 26.24 | b3b5°b5b6                       | 1692.90 | 64.425  | 3567  | 3 | 564.97  | 9.23   |
| Q8ZRP0 YAET_SALTY Outer membrane protein assembly factor yaeT | 11 |                       | LGFFETVDTDTQR                          | 391 | 13 | 4 | 20.67 | b1b5y4y10                       | 1528.72 | 74.170  | 2810  | 3 | 510.25  | -2.16  |
| Q8ZRP0 YAET_SALTY Outer membrane protein assembly factor yaeT | 12 |                       | SYGTDVTLGFPINEYNTLR                    | 507 | 19 | 4 | 14.96 | b9b11°b11y9                     | 2160.09 | 85.819  | 5874  | 2 | 1080.55 | 15.37  |
| Q8ZRP0 YAET_SALTY Outer membrane protein assembly factor yaeT | 13 |                       | IQQINIVGNHAFSTEELISHFQLR               | 176 | 24 | 3 | 12.72 | b3b5y10                         | 2794.45 | 95.173  | 4420  | 3 | 932.16  | -3.06  |

|                                                               |    |                      |                                       |     |    |    |       |                                    |         |         |       |   |         |        |
|---------------------------------------------------------------|----|----------------------|---------------------------------------|-----|----|----|-------|------------------------------------|---------|---------|-------|---|---------|--------|
| Q8ZRP0 YAET_SALTY Outer membrane protein assembly factor yaeT | 14 |                      | VTIPGSDNEYK                           | 594 | 12 | 4  | 35.53 | b6b7b8°b8                          | 1385.67 | 50.564  | 3404  | 2 | 693.34  | 6.70   |
| Q8ZRP0 YAET_SALTY Outer membrane protein assembly factor yaeT | 15 |                      | VGESLDR                               | 120 | 7  | 5  | 37.49 | b6°b6y4y5°y5                       | 775.40  | 36.973  | 1607  | 2 | 388.20  | 5.82   |
| Q8ZRP0 YAET_SALTY Outer membrane protein assembly factor yaeT | 16 |                      | TTLSDIEKGLDFYYSVGK                    | 127 | 19 | 5  | 29.46 | b5b8y6y8y13                        | 2165.08 | 82.029  | 75576 | 2 | 1083.05 | 9.13   |
| Q8ZRP0 YAET_SALTY Outer membrane protein assembly factor yaeT | 17 |                      | LNRLGFFETVDTDTQR                      | 388 | 16 | 5  | 27.7  | b13y4*y4y7y9                       | 1911.95 | 90.684  | 17705 | 2 | 956.48  | -4.47  |
| Q8ZRP0 YAET_SALTY Outer membrane protein assembly factor yaeT | 18 |                      | GYFPTDGSRVNLTGK                       | 579 | 15 | 8  | 69.33 | b4b8b10b11b13y11°y11y12            | 1611.80 | 55.638  | 11201 | 2 | 806.40  | -10.83 |
| Q8ZRP0 YAET_SALTY Outer membrane protein assembly factor yaeT | 19 |                      | QMEGAWLGSDLVDQGKER                    | 370 | 18 | 12 | 61.89 | b3b5b7°b7y6y9y11y13°y13y14°y14*y14 | 2018.98 | 94.529  | 7183  | 3 | 673.67  | 12.03  |
| Q8ZRP0 YAET_SALTY Outer membrane protein assembly factor yaeT | 20 |                      | IEPGELYNGTKVTK                        | 289 | 14 | 4  | 27.88 | b5°b5b7b11                         | 1548.82 | 36.959  | 4288  | 3 | 516.94  | -7.41  |
| Q8ZRP0 YAET_SALTY Outer membrane protein assembly factor yaeT | 21 |                      | LSGVQVSGNLAGHSAEIENLTKIE<br>PGELYNGTK | 267 | 33 | 4  | 25.83 | y4y6y7y9                           | 3425.72 | 114.545 | 3785  | 3 | 1142.58 | -9.76  |
| Q8ZRP0 YAET_SALTY Outer membrane protein assembly factor yaeT | 22 |                      | LAGDLETLSYYLDR                        | 218 | 15 | 3  | 18.16 | b4y4y10                            | 1784.91 | 80.919  | 2445  | 3 | 595.64  | -3.08  |
| Q8ZRP0 YAET_SALTY Outer membrane protein assembly factor yaeT | 23 |                      | LDRGYFPTDGSR                          | 576 | 12 | 4  | 37.3  | b9y4y6y9                           | 1383.68 | 62.048  | 1749  | 2 | 692.34  | 7.32   |
| Q8ZRP0 YAET_SALTY Outer membrane protein assembly factor yaeT | 24 | Oxidation+M(2)       | QMEGAWLGSDLVDQGKER                    | 370 | 18 | 3  | 23    | b11b12y12                          | 2034.97 | 72.913  | 2068  | 3 | 679.00  | 9.36   |
| Q8ZRP0 YAET_SALTY Outer membrane protein assembly factor yaeT | 25 |                      | PQIAMDR                               | 540 | 7  | 0  | 2.82  |                                    | 830.42  | 51.802  | 6563  | 1 | 830.42  | 7.13   |
| P0A7Z7 RPOA_SALTY DNA-directed RNA polymerase subunit alpha   | 1  |                      | LVDIEQVSSTHAK                         | 12  | 13 | 6  | 28.15 | b2y1y5°y5y7y8                      | 1426.73 | 46.056  | 43222 | 3 | 476.25  | -14.29 |
| P0A7Z7 RPOA_SALTY DNA-directed RNA polymerase subunit alpha   | 2  |                      | VTLEPLER                              | 25  | 8  | 6  | 54.13 | y1y4y5y6y7y8                       | 956.53  | 52.762  | 41428 | 2 | 478.77  | -11.36 |
| P0A7Z7 RPOA_SALTY DNA-directed RNA polymerase subunit alpha   | 3  | Carbamidomethyl+C(6) | LLVDACYSPVER                          | 170 | 12 | 9  | 83.98 | b2b7y4y5y7y8y9y10y12               | 1421.71 | 60.105  | 34177 | 2 | 711.36  | 3.01   |
| P0A7Z7 RPOA_SALTY DNA-directed RNA polymerase subunit alpha   | 4  |                      | EGVQEDILEILLNLK                       | 71  | 15 | 10 | 58.65 | b2b7y1y2y3y4y5y6y8y15              | 1725.97 | 122.853 | 17543 | 2 | 863.49  | 5.38   |
| P0A7Z7 RPOA_SALTY DNA-directed RNA polymerase subunit alpha   | 5  |                      | MQGSVTEFLKPR                          | 0   | 12 | 3  | 32.52 | y4y7y9                             | 1392.71 | 59.743  | 47063 | 3 | 464.91  | -16.30 |
| P0A7Z7 RPOA_SALTY DNA-directed RNA polymerase subunit alpha   | 6  |                      | IHSEEDERPIGR                          | 158 | 12 | 4  | 36.2  | b3b4y6y11                          | 1437.72 | 66.996  | 26964 | 2 | 719.36  | 6.79   |
| P0A7Z7 RPOA_SALTY DNA-directed RNA polymerase subunit alpha   | 7  |                      | LVIEMETNGTIDPEEAIR                    | 200 | 18 | 6  | 15.6  | b7b9°b9*b9y13°y13                  | 2030.03 | 84.369  | 25497 | 3 | 677.35  | 9.08   |

|                                                                   |    |                       |                                                |     |    |    |       |                                  |         |         |        |   |         |        |
|-------------------------------------------------------------------|----|-----------------------|------------------------------------------------|-----|----|----|-------|----------------------------------|---------|---------|--------|---|---------|--------|
| P0A7Z7 RPOA_SALTY DNA-directed RNA polymerase subunit alpha       | 8  | Carbamidomethyl+C(10) | RILLSSMPGCAVTEVEIDGVLHEY<br>STK                | 44  | 27 | 11 | 62.38 | b10°b10b11b12°b12y4y7°y7y9y13y26 | 3004.49 | 115.107 | 156052 | 4 | 751.88  | -6.91  |
| P0A7Z7 RPOA_SALTY DNA-directed RNA polymerase subunit alpha       | 9  | Carbamidomethyl+C(26) | EEKPEFDPILLRPVDDLELTVRSAN<br>CLK               | 243 | 28 | 3  | 11.71 | b4b10y6                          | 3296.71 | 85.831  | 21979  | 5 | 660.15  | -1.63  |
| P0A7Z7 RPOA_SALTY DNA-directed RNA polymerase subunit alpha       | 10 |                       | VEQRTDLDK                                      | 191 | 9  | 4  | 30.51 | b4°b4y4y5                        | 1103.56 | 67.107  | 6943   | 2 | 552.28  | -12.17 |
| P0A7Z7 RPOA_SALTY DNA-directed RNA polymerase subunit alpha       | 11 |                       | GLSLGMRLNWPPASIADE                             | 310 | 19 | 4  | 14.96 | b6°b6b8y5                        | 2056.02 | 50.581  | 4488   | 3 | 686.01  | 2.02   |
| P0A7Z7 RPOA_SALTY DNA-directed RNA polymerase subunit alpha       | 12 | Carbamidomethyl+C(6)  | LLVDACYSPVERIAYNVEAAR                          | 170 | 21 | 4  | 22.34 | b10b11y7°y7                      | 2409.20 | 80.296  | 2342   | 2 | 1205.11 | -7.80  |
| P0A7Z7 RPOA_SALTY DNA-directed RNA polymerase subunit alpha       | 13 |                       | DIEQVSSTHAK                                    | 14  | 11 | 0  | 3.23  |                                  | 1214.60 | 46.087  | 6913   | 2 | 607.80  | -0.40  |
| P0A2C7 POTD_SALTY ermidine/putrescine-binding periplasmic protein | 1  |                       | LGYSNGTTDPKEIAAYEELK                           | 179 | 21 | 4  | 13.89 | b8y5y10y21                       | 2328.09 | 82.411  | 28260  | 3 | 776.70  | -14.79 |
| P0A2C7 POTD_SALTY ermidine/putrescine-binding periplasmic protein | 2  |                       | EVAETIGYPTPNLAAR                               | 285 | 16 | 5  | 34.59 | b2°b2y8y9y10                     | 1701.89 | 61.827  | 16590  | 2 | 851.45  | 8.25   |
| P0A2C7 POTD_SALTY ermidine/putrescine-binding periplasmic protein | 3  |                       | LTFNHNLDPMLNKPFDPNNDYS<br>VPYIWGATAIGVNSDAIDPK | 103 | 43 | 7  | 21.45 | b2b9y1y2y7y8y10                  | 4803.34 | 95.633  | 11005  | 4 | 1201.59 | 8.54   |
| P0A2C7 POTD_SALTY ermidine/putrescine-binding periplasmic protein | 4  |                       | LMPNVAAFNSDNPANPYMEGEV<br>NLGMVWNGSAFVAR       | 201 | 36 | 10 | 37.54 | b2b3b9°b9b10°b10b14b15y14°y14    | 3882.80 | 99.686  | 8864   | 4 | 971.46  | -1.45  |
| P0A2C7 POTD_SALTY ermidine/putrescine-binding periplasmic protein | 5  |                       | TYKDGAYDLVVPSTYYVDK                            | 70  | 19 | 5  | 22.74 | b6b7°b7y8°y8                     | 2197.07 | 77.632  | 8536   | 3 | 733.03  | 1.89   |
| P0A2C7 POTD_SALTY ermidine/putrescine-binding periplasmic protein | 6  |                       | TITSWADLWKPEYK                                 | 146 | 14 | 3  | 27.09 | y4y8y9                           | 1737.85 | 83.314  | 43732  | 3 | 579.96  | -18.26 |
| P0A2C7 POTD_SALTY ermidine/putrescine-binding periplasmic protein | 7  |                       | EGGIFWMDSLAIPANAK                              | 249 | 17 | 5  | 16.34 | b5°b5b15°b15y13                  | 1819.92 | 94.467  | 35659  | 2 | 910.46  | 8.45   |
| P0A2C7 POTD_SALTY ermidine/putrescine-binding periplasmic protein | 8  |                       | NSLLLTDDAR                                     | 160 | 10 | 3  | 26.94 | b6y5y7                           | 1117.59 | 69.717  | 7238   | 2 | 559.30  | 2.29   |
| P0A2C7 POTD_SALTY ermidine/putrescine-binding periplasmic protein | 9  |                       | EVFQMALR                                       | 170 | 8  | 4  | 40.9  | b3b6°b6b7                        | 993.52  | 77.064  | 2360   | 2 | 497.27  | 4.12   |
| P0A2C7 POTD_SALTY ermidine/putrescine-binding periplasmic protein | 10 |                       | DGAYDLVVPSTYYVDK                               | 73  | 16 | 4  | 24.89 | y4°y4y7y10                       | 1804.83 | 67.610  | 1971   | 3 | 602.28  | -18.26 |
| P0A2C7 POTD_SALTY ermidine/putrescine-binding periplasmic protein | 11 |                       | EGALK                                          | 268 | 5  | 1  | 13.23 | b4                               | 517.30  | 46.034  | 1546   | 1 | 517.30  | 6.14   |
| P0A2C7 POTD_SALTY ermidine/putrescine-binding periplasmic protein | 12 |                       | SLYPDAQTISKGEWQNDVGDASA<br>IYEEYYQK            | 312 | 31 | 7  | 24.45 | b3b4b12°b12y10y13°y13            | 3568.69 | 81.970  | 6014   | 3 | 1190.23 | 13.34  |
| P0A1B7 ATPE_SALTY ATP synthase epsilon chain                      | 1  |                       | IQVTGSEGELGIYPGHAPLLTAIKP<br>GMIR              | 23  | 29 | 11 | 42.92 | b2°b2b3b13y2y4y5y12y13y27y29     | 3018.61 | 82.710  | 73384  | 4 | 755.41  | -9.87  |
| P0A1B7 ATPE_SALTY ATP synthase epsilon chain                      | 2  |                       | AMTYHLDVVSAEQQMFGSLVEK                         | 1   | 22 | 12 | 66.22 | b4b8b9b11°b11b12y3y8y9°y9y12y22  | 2483.19 | 91.078  | 29576  | 3 | 828.40  | -1.87  |

|                                                         |    |                       |                                   |     |    |    |       |                                  |         |         |       |   |         |        |
|---------------------------------------------------------|----|-----------------------|-----------------------------------|-----|----|----|-------|----------------------------------|---------|---------|-------|---|---------|--------|
| P0A1B7 ATPE_SALTY ATP synthase epsilon chain            | 3  |                       | SSHGDVDYAQASAE LAK                | 107 | 17 | 4  | 29.95 | b7b8y6y8                         | 1748.79 | 45.982  | 23560 | 3 | 583.60  | -11.87 |
| P0A1B7 ATPE_SALTY ATP synthase epsilon chain            | 4  |                       | AEEHIKSSHGDVDYAQASAE LAK          | 101 | 23 | 3  | 13.06 | b13y6y11                         | 2456.18 | 74.533  | 6916  | 4 | 614.80  | 4.08   |
| Q8ZNW0 KPYK2_SALTY Pyruvate kinase II                   | 1  |                       | ISSGLPIFAMSR                      | 397 | 12 | 3  | 29.51 | y4y5y7                           | 1278.68 | 81.383  | 9763  | 2 | 639.84  | -7.83  |
| Q8ZNW0 KPYK2_SALTY Pyruvate kinase II                   | 2  |                       | GDLGVEIGDPELVGIQK                 | 250 | 17 | 3  | 23.74 | b8b10b12                         | 1738.91 | 100.403 | 7330  | 2 | 869.96  | -5.55  |
| Q8ZNW0 KPYK2_SALTY Pyruvate kinase II                   | 3  |                       | GVTPVHFDSAADGVVAAHEAVN LLR        | 421 | 25 | 5  | 18.64 | b2b3b12b20y2                     | 2545.30 | 80.200  | 4870  | 3 | 849.11  | -5.76  |
| Q8ZNW0 KPYK2_SALTY Pyruvate kinase II                   | 4  |                       | LDVQFDNVEEAIAMSAMYAANH LK         | 353 | 24 | 7  | 26.19 | b7*b7b11y1y11y12*y12             | 2680.28 | 111.289 | 4678  | 3 | 894.10  | 2.28   |
| Q8ZNW0 KPYK2_SALTY Pyruvate kinase II                   | 5  |                       | AVITATQMMESMITNPMPT R             | 278 | 20 | 4  | 14.39 | b11*b11y4y8                      | 2223.09 | 70.791  | 1576  | 2 | 1112.05 | 11.42  |
| Q8ZNW0 KPYK2_SALTY Pyruvate kinase II                   | 6  |                       | DKGYLVSGDLVIVTQGDVMSTV GSTNTTR    | 446 | 29 | 3  | 11.54 | b4y7y11                          | 3013.49 | 76.415  | 10822 | 4 | 754.13  | -8.34  |
| Q8ZNW0 KPYK2_SALTY Pyruvate kinase II                   | 7  | Oxidation+M(8)        | AVITATQMMESMITNPMPT R             | 278 | 20 | 6  | 30.68 | b8*b8b12b13y4y11                 | 2239.06 | 85.252  | 4278  | 2 | 1120.03 | 1.20   |
| Q8ZPU5 NADE_SALTY NH(3)-dependent NAD(+) synthetase     | 1  |                       | TIEGWYVK                          | 249 | 8  | 3  | 33.12 | b6b7y5                           | 995.53  | 38.271  | 7492  | 2 | 498.27  | 9.99   |
| Q8ZPU5 NADE_SALTY NH(3)-dependent NAD(+) synthetase     | 2  |                       | AQYSIAGMTHGVVVGTDHAAEAI TGFFTK    | 144 | 29 | 8  | 35.8  | b6*b6b7*b7b8*b8b11y11            | 2979.50 | 99.571  | 6340  | 3 | 993.84  | 11.88  |
| Q8ZPU5 NADE_SALTY NH(3)-dependent NAD(+) synthetase     | 3  |                       | SVDFLK                            | 25  | 6  | 1  | 13.63 | b5                               | 708.39  | 60.500  | 10815 | 1 | 708.39  | -9.91  |
| Q8ZPU5 NADE_SALTY NH(3)-dependent NAD(+) synthetase     | 4  |                       | LSQMAIAELR                        | 58  | 10 | 4  | 40.17 | b6y5y7y8                         | 1131.60 | 30.612  | 2290  | 3 | 377.87  | -20.17 |
| Q8ZPU5 NADE_SALTY NH(3)-dependent NAD(+) synthetase     | 5  |                       | TIEGWYVKTEHK                      | 249 | 12 | 3  | 22.3  | b8y3y11                          | 1490.78 | 73.422  | 6418  | 2 | 745.89  | 7.62   |
| Q8ZPU5 NADE_SALTY NH(3)-dependent NAD(+) synthetase     | 6  |                       | GTDHAAEAITGFFTK                   | 158 | 15 | 5  | 17.5  | b6*b6b9b13*b13                   | 1565.75 | 99.590  | 3044  | 3 | 522.59  | -2.96  |
| P65933 PYRH_SALTY Uridylate kinase                      | 1  |                       | VDGVFTADPAK                       | 166 | 11 | 3  | 27.34 | b6y6y7                           | 1119.56 | 46.761  | 13968 | 2 | 560.28  | -11.23 |
| P65933 PYRH_SALTY Uridylate kinase                      | 2  |                       | VDGVFTADPAKDPSATMYDQLT YSEVLDKELK | 166 | 32 | 5  | 22.8  | b1b10*b10b12b13                  | 3546.70 | 82.938  | 12452 | 4 | 887.43  | -5.58  |
| P65933 PYRH_SALTY Uridylate kinase                      | 3  |                       | VVGDHMGMLATVMNGLAMR               | 73  | 19 | 6  | 33.39 | b1b3b6b14b15y7                   | 2002.97 | 93.195  | 3781  | 3 | 668.33  | 0.37   |
| P65933 PYRH_SALTY Uridylate kinase                      | 4  |                       | VDGVFTADPAKDPSATMYDQLT YSEVLDK    | 166 | 29 | 4  | 22.73 | b10*b10b13b14                    | 3176.52 | 91.754  | 3124  | 3 | 1059.51 | 5.69   |
| P65933 PYRH_SALTY Uridylate kinase                      | 5  | Carbamidomethyl+C(11) | LMSAIPLNGVCDNYSWAE AISLLR         | 103 | 24 | 6  | 27.62 | b3b13y12y13*y13y23               | 2693.31 | 95.660  | 11017 | 3 | 898.44  | -10.70 |
| P65933 PYRH_SALTY Uridylate kinase                      | 6  |                       | LPIR                              | 212 | 4  | 1  | 12.83 | b3                               | 498.34  | 91.216  | 3133  | 1 | 498.34  | -4.53  |
| P65933 PYRH_SALTY Uridylate kinase                      | 7  |                       | GIEIEADVVLK                       | 152 | 11 | 3  | 27.34 | b4b5y5                           | 1185.65 | 70.703  | 2935  | 2 | 593.33  | -16.16 |
| P65933 PYRH_SALTY Uridylate kinase                      | 8  |                       | LSGEALQGTGFGIDASILDRMAQ EIK       | 15  | 27 | 3  | 11.92 | b8b11y4                          | 2849.40 | 93.511  | 3439  | 3 | 950.47  | -12.08 |
| P65933 PYRH_SALTY Uridylate kinase                      | 9  | Carbamidomethyl+C(17) | AYVNARLMSAIPLNGVCDNYSWA E AISLLR  | 97  | 30 | 4  | 14.19 | b9b14y9y13                       | 3367.70 | 86.770  | 2716  | 3 | 1123.24 | 2.03   |
| P65933 PYRH_SALTY Uridylate kinase                      | 10 | Oxidation+M(18)       | VVGDHMGMLATVMNGLAMR               | 73  | 19 | 6  | 29.46 | b6*b6b9b12y6y9                   | 2018.95 | 72.907  | 12219 | 2 | 1009.98 | -5.80  |
| P20753 PPIA_SALTY Peptidyl-prolyl cis-trans isomerase A | 1  |                       | TADKDSATSQFFINVADNAFLDH GQR       | 116 | 26 | 12 | 56.27 | b2b7b10*b10y3y4*y4y5y7y11y12*y12 | 2868.33 | 86.754  | 82088 | 4 | 717.84  | -9.19  |
| P20753 PPIA_SALTY Peptidyl-prolyl cis-trans isomerase A | 2  |                       | NFVDYVNSGFYNNTTFHR                | 54  | 18 | 7  | 44.37 | b2y6y8y9y12y14y18                | 2194.98 | 75.430  | 42955 | 3 | 732.33  | -5.67  |
| P20753 PPIA_SALTY Peptidyl-prolyl cis-trans isomerase A | 3  |                       | VIPGFMIQGGGFNEQM QK               | 72  | 19 | 5  | 21.91 | b2y8y11y17y19                    | 2109.05 | 77.392  | 41372 | 2 | 1055.03 | 11.23  |
| P20753 PPIA_SALTY Peptidyl-prolyl cis-trans isomerase A | 4  |                       | ISQVPTHDVGPYQNVPTKPVVILS AK       | 161 | 26 | 6  | 15.82 | b1b7b12y8y11y26                  | 2787.51 | 62.789  | 20072 | 4 | 697.63  | -12.61 |



|                                                             |   |                                                      |                                        |      |    |    |       |                               |         |         |       |   |         |        |
|-------------------------------------------------------------|---|------------------------------------------------------|----------------------------------------|------|----|----|-------|-------------------------------|---------|---------|-------|---|---------|--------|
| P20753 PIIA_SALTY Peptidyl-prolyl cis-trans isomerase A     | 5 |                                                      | GMDVADKISQVPTHDVGPYQNV<br>PTKPVVILSAK  | 154  | 33 | 10 | 51.03 | b3b5b9b13b16y3y6y8y11y31      | 3503.84 | 69.114  | 79456 | 4 | 876.71  | -5.50  |
| P20753 PIIA_SALTY Peptidyl-prolyl cis-trans isomerase A     | 6 |                                                      | NTRGTIAMAR                             | 106  | 10 | 5  | 40.17 | b3b6*b6b7y7                   | 1090.58 | 77.907  | 15465 | 2 | 545.80  | 3.92   |
| P00929 TRPA_SALTY Tryptophan synthase alpha chain           | 1 | Carbamidomethyl+C(9)                                 | HNIAPIFICPPNADDDLRL                    | 145  | 19 | 4  | 14.96 | b13y10y12y19                  | 2191.12 | 97.131  | 15909 | 2 | 1096.06 | 11.03  |
| P00929 TRPA_SALTY Tryptophan synthase alpha chain           | 2 |                                                      | EGAFVPFVTLGDPGIEQSLK                   | 15   | 20 | 8  | 30.68 | b4b5*b5b7*b7y8y10y20          | 2104.12 | 94.939  | 12044 | 2 | 1052.56 | 9.28   |
| P00929 TRPA_SALTY Tryptophan synthase alpha chain           | 3 |                                                      | HPTIPIGLLMYANLVFNNGIDAFY<br>AR         | 91   | 26 | 6  | 36.54 | y1y5y9y10y11y26               | 2920.50 | 105.977 | 11222 | 4 | 730.88  | -4.68  |
| P00929 TRPA_SALTY Tryptophan synthase alpha chain           | 4 | Carbamidomethyl+C(11)                                | AFAAGVTPAQCFEMLALIR                    | 70   | 19 | 6  | 36.32 | b2b4y12y13y14y19              | 2066.06 | 102.172 | 8764  | 2 | 1033.54 | 3.19   |
| P00929 TRPA_SALTY Tryptophan synthase alpha chain           | 5 |                                                      | QVASYGRGYTYLLSR                        | 164  | 15 | 4  | 37.93 | b6b7b8y7                      | 1733.89 | 44.281  | 1868  | 3 | 578.64  | -2.96  |
| P00929 TRPA_SALTY Tryptophan synthase alpha chain           | 6 |                                                      | GYTYLLSRSGVTGAENR                      | 171  | 17 | 3  | 24.99 | y5y6y11                       | 1843.94 | 74.045  | 1560  | 2 | 922.48  | 7.48   |
| P00929 TRPA_SALTY Tryptophan synthase alpha chain           | 7 | Phosphoryl STY(10)                                   | REGAFVPFVTLGDPGIEQSLK                  | 14   | 21 | 6  | 40.93 | b6*b6b10y10_H3PO4<br>y9y10y11 | 2340.15 | 55.645  | 9745  | 3 | 780.72  | 0.21   |
| P00929 TRPA_SALTY Tryptophan synthase alpha chain           | 8 | Phosphoryl STY(4)                                    | LKEYHAAPALQGFGISSPEQVSAA<br>VR         | 199  | 26 | 3  | 12.15 | b3y16y22                      | 2806.39 | 67.960  | 7006  | 4 | 702.35  | 3.74   |
| P00929 TRPA_SALTY Tryptophan synthase alpha chain           | 9 | Phosphoryl STY(9)                                    | EGAFVPFVTLGDPGIEQSLK                   | 15   | 20 | 5  | 45.26 | b4b7b10b11b12                 | 2184.07 | 93.234  | 4672  | 3 | 728.70  | 8.27   |
| O68926 BFR_SALTY Bacterioferritin                           | 1 |                                                      | ILFLEGIPNLQDLGK                        | 61   | 15 | 7  | 29.48 | b2b5y3y8y11*y11y15            | 1669.96 | 101.421 | 9457  | 2 | 835.48  | 1.54   |
| O68926 BFR_SALTY Bacterioferritin                           | 2 |                                                      | LGIGEDVEEMLR                           | 76   | 12 | 5  | 32.52 | y5*y5y7y9y12                  | 1360.68 | 83.311  | 7751  | 2 | 680.84  | 2.87   |
| O68926 BFR_SALTY Bacterioferritin                           | 3 |                                                      | LLGNELVAINQYFLHAR                      | 13   | 17 | 3  | 16.34 | b3y8y10                       | 1971.07 | 96.659  | 12884 | 3 | 657.69  | -7.68  |
| O68926 BFR_SALTY Bacterioferritin                           | 4 |                                                      | EAIAYADSVHDYVSR                        | 102  | 15 | 5  | 37.14 | b3b6b10y4y6                   | 1695.80 | 84.322  | 2816  | 3 | 565.94  | -0.29  |
| O68926 BFR_SALTY Bacterioferritin                           | 5 |                                                      | DMMIEILADEEGHIDWLETDLI<br>AK           | 117  | 26 | 4  | 22.82 | b6*b6b7b9                     | 3042.41 | 115.109 | 2658  | 5 | 609.29  | -19.66 |
| P0A2R4 RPOC_SALTY DNA-directed RNA polymerase subunit beta' | 1 |                                                      | VTAEDVLKPGTADILVPR                     | 842  | 18 | 6  | 29.18 | b5*b5b6y3y5y18                | 1894.04 | 72.985  | 14495 | 3 | 632.02  | -12.18 |
| P0A2R4 RPOC_SALTY DNA-directed RNA polymerase subunit beta' | 2 |                                                      | FTDMIDGQTITR                           | 1036 | 12 | 6  | 34.29 | b5b10b11y7y12*y12             | 1397.67 | 58.390  | 13053 | 2 | 699.34  | 0.17   |
| P0A2R4 RPOC_SALTY DNA-directed RNA polymerase subunit beta' | 3 |                                                      | IALASPD MIR                            | 21   | 10 | 5  | 51.93 | y3y5y6y7y10                   | 1086.59 | 61.751  | 10895 | 2 | 543.80  | -9.55  |
| P0A2R4 RPOC_SALTY DNA-directed RNA polymerase subunit beta' | 4 |                                                      | EGLNVLYQYFISTHGAR                      | 764  | 16 | 4  | 17.18 | b3b8y10y16                    | 1804.94 | 91.844  | 8256  | 2 | 902.98  | 5.21   |
| P0A2R4 RPOC_SALTY DNA-directed RNA polymerase subunit beta' | 5 |                                                      | SWSFGEVK                               | 31   | 8  | 4  | 40.9  | b2y3y4y5                      | 939.45  | 33.478  | 4707  | 2 | 470.23  | -7.67  |
| P0A2R4 RPOC_SALTY DNA-directed RNA polymerase subunit beta' | 6 | Carbamidomethyl+C(10)<br>;Carbamidomethyl+C(12)<br>) | IFGPVKDYECLCGK                         | 60   | 14 | 4  | 27.61 | b9b13y3y10                    | 1685.79 | 94.565  | 3731  | 2 | 843.40  | -5.36  |
| P0A2R4 RPOC_SALTY DNA-directed RNA polymerase subunit beta' | 7 |                                                      | ASLATESFISAASFQETTR                    | 1311 | 19 | 5  | 23.68 | b9*b9b12b15y13                | 2017.01 | 90.497  | 3714  | 2 | 1009.01 | 13.31  |
| P0A2R4 RPOC_SALTY DNA-directed RNA polymerase subunit beta' | 8 |                                                      | HEIISEAEAEVAIEQEQFSGLVTA<br>GER        | 650  | 28 | 6  | 31.19 | b7b11b12y5y8y13               | 3070.51 | 115.131 | 2900  | 3 | 1024.17 | 3.90   |
| P0A2R4 RPOC_SALTY DNA-directed RNA polymerase subunit beta' | 9 |                                                      | AAGEQPATPQVTAEDASASLAELL<br>NAGLGGSDNE | 1373 | 34 | 4  | 22.92 | b10b12b13y34                  | 3254.58 | 117.800 | 2290  | 3 | 1085.53 | 13.95  |

|                                                             |    |                      |                                         |      |    |   |       |                       |         |         |       |   |         |        |
|-------------------------------------------------------------|----|----------------------|-----------------------------------------|------|----|---|-------|-----------------------|---------|---------|-------|---|---------|--------|
| P0A2R4 RPOC_SALTY DNA-directed RNA polymerase subunit beta' | 10 |                      | SGASVGIDDMVPEK                          | 634  | 15 | 3 | 18.16 | b3b12y9               | 1517.79 | 47.394  | 73813 | 2 | 759.40  | 22.36  |
| P0A2R4 RPOC_SALTY DNA-directed RNA polymerase subunit beta' | 11 |                      | GLMAKPDGSIETPITANFR                     | 744  | 20 | 5 | 34.6  | y8y9°y9y10°y10        | 2131.12 | 96.581  | 32269 | 3 | 711.05  | -0.57  |
| P0A2R4 RPOC_SALTY DNA-directed RNA polymerase subunit beta' | 12 | Carbamidomethyl+C(9) | NTLLHEQWCDLLEANSVDAVK                   | 860  | 21 | 8 | 40.64 | b6°b6*b6b7b9y4y9y10   | 2455.20 | 67.661  | 14574 | 4 | 614.56  | 2.98   |
| P0A2R4 RPOC_SALTY DNA-directed RNA polymerase subunit beta' | 13 |                      | LGIQAFEPVLIEGK                          | 431  | 14 | 5 | 30.78 | b4y4y9y10°y10         | 1513.86 | 86.673  | 11748 | 2 | 757.43  | -0.97  |
| P0A2R4 RPOC_SALTY DNA-directed RNA polymerase subunit beta' | 14 | Carbamidomethyl+C(5) | DGLFCAR                                 | 53   | 7  | 3 | 37.49 | b4y5y6                | 838.38  | 110.921 | 9368  | 1 | 838.38  | -11.28 |
| P0A2R4 RPOC_SALTY DNA-directed RNA polymerase subunit beta' | 15 |                      | ALMMSTNNILSPANGEPHIIVPSQD<br>VVGLGYYMTR | 481  | 34 | 6 | 17.41 | b6b18y3y6°y6y8        | 3707.92 | 101.368 | 6715  | 5 | 742.39  | 8.30   |
| P0A2R4 RPOC_SALTY DNA-directed RNA polymerase subunit beta' | 16 |                      | TFHIGGAASR                              | 933  | 10 | 3 | 26.94 | b6b9y9                | 1016.52 | 34.849  | 5699  | 2 | 508.76  | -8.89  |
| P0A2R4 RPOC_SALTY DNA-directed RNA polymerase subunit beta' | 17 |                      | QTDELTLGLSSLVVLDSAER                    | 1048 | 19 | 7 | 29.46 | b9*b9b12b14y13°y13y18 | 2033.06 | 87.564  | 4166  | 2 | 1017.03 | 10.81  |
| P0A2R4 RPOC_SALTY DNA-directed RNA polymerase subunit beta' | 18 | Carbamidomethyl+C(4) | GVICEK                                  | 81   | 6  | 3 | 40.1  | b3b4b5                | 705.36  | 41.589  | 4147  | 1 | 705.36  | -3.72  |
| P0A2R4 RPOC_SALTY DNA-directed RNA polymerase subunit beta' | 19 |                      | LVITPVDGSDPYEEMIPK                      | 1174 | 18 | 3 | 23    | b10b11y6              | 2003.00 | 74.107  | 3615  | 3 | 668.34  | -2.38  |
| P0A2R4 RPOC_SALTY DNA-directed RNA polymerase subunit beta' | 20 |                      | IPQESGGTK                               | 1123 | 9  | 6 | 67.77 | b4°b4b8y3y5y7         | 916.49  | 39.737  | 3561  | 2 | 458.75  | 13.72  |
| P0A2R4 RPOC_SALTY DNA-directed RNA polymerase subunit beta' | 21 |                      | LIPAGTGYAYHQDR                          | 1355 | 14 | 4 | 38.77 | y3y7y8y10             | 1561.81 | 48.164  | 3213  | 3 | 521.27  | 20.79  |
| P0A2R4 RPOC_SALTY DNA-directed RNA polymerase subunit beta' | 22 |                      | IVDAQGNDVLIPTDMPAQYFLP<br>GK            | 1079 | 25 | 4 | 16.33 | b4b7y10y14            | 2659.36 | 89.764  | 3042  | 2 | 1330.18 | 4.77   |
| P0A2R4 RPOC_SALTY DNA-directed RNA polymerase subunit beta' | 23 |                      | GVHAVTR                                 | 1224 | 7  | 3 | 40.5  | b3b4b5                | 739.43  | 43.130  | 3038  | 2 | 370.22  | 8.17   |
| P0A2R4 RPOC_SALTY DNA-directed RNA polymerase subunit beta' | 24 |                      | VLTEAAVAGK                              | 1330 | 10 | 3 | 28.7  | b6y7y8                | 958.55  | 36.465  | 2957  | 2 | 479.78  | -6.11  |
| P0A2R4 RPOC_SALTY DNA-directed RNA polymerase subunit beta' | 25 |                      | VPYGAVMAK                               | 996  | 9  | 3 | 38.3  | y4y5y7                | 935.51  | 36.888  | 2716  | 2 | 468.26  | 7.05   |
| P0A2R4 RPOC_SALTY DNA-directed RNA polymerase subunit beta' | 26 |                      | DGQEEQQVSFNSIYMMADSGAR                  | 709  | 22 | 4 | 24.25 | b8y7y8y12             | 2463.11 | 64.600  | 2690  | 3 | 821.71  | 22.30  |
| P0A2R4 RPOC_SALTY DNA-directed RNA polymerase subunit beta' | 27 |                      | VLYFESYVVIEGGMTNLER                     | 137  | 19 | 7 | 25.9  | b8°b8b9°b9b11y4*y4    | 2219.08 | 60.108  | 2435  | 2 | 1110.04 | -11.22 |
| P0A2R4 RPOC_SALTY DNA-directed RNA polymerase subunit beta' | 28 |                      | MLQEAVDALLDNGR                          | 297  | 14 | 5 | 33.05 | b4b5y5y8*y8           | 1544.75 | 136.603 | 2246  | 1 | 1544.75 | -14.46 |

|                                                             |    |                                            |                                      |      |    |   |       |                         |         |         |       |   |         |        |
|-------------------------------------------------------------|----|--------------------------------------------|--------------------------------------|------|----|---|-------|-------------------------|---------|---------|-------|---|---------|--------|
| P0A2R4 RPOC_SALTY DNA-directed RNA polymerase subunit beta' | 29 |                                            | AIVQLEDGVQISSGDTLAR                  | 1104 | 19 | 4 | 24.13 | y3y9°y9y10              | 1972.00 | 67.203  | 1995  | 2 | 986.50  | -19.31 |
| P0A2R4 RPOC_SALTY DNA-directed RNA polymerase subunit beta' | 30 | Carbamidomethyl+C(5)                       | MLNTCYRILGLKPTVIFADQMTYT GFAYAAR     | 603  | 31 | 7 | 29.6  | b9b10°b10y4y11y23*y23   | 3585.81 | 109.916 | 25066 | 4 | 897.21  | 0.34   |
| P0A2R4 RPOC_SALTY DNA-directed RNA polymerase subunit beta' | 31 |                                            | SWSFGEVKKPETINYR                     | 31   | 16 | 3 | 17.18 | b8b12y3                 | 1940.97 | 85.969  | 14277 | 3 | 647.66  | -7.55  |
| P0A2R4 RPOC_SALTY DNA-directed RNA polymerase subunit beta' | 32 |                                            | HEIISEAAEVAEIQEQFQSGLVTA GERYNK      | 650  | 31 | 3 | 22.05 | b11b12y7                | 3475.66 | 84.367  | 11647 | 4 | 869.67  | -11.38 |
| P0A2R4 RPOC_SALTY DNA-directed RNA polymerase subunit beta' | 33 |                                            | AQTKTEEFDAIK                         | 9    | 12 | 4 | 22.3  | b6*b6y5y10              | 1380.68 | 48.854  | 9066  | 3 | 460.90  | -12.64 |
| P0A2R4 RPOC_SALTY DNA-directed RNA polymerase subunit beta' | 34 |                                            | RVDYSGR                              | 345  | 7  | 3 | 40.5  | b3b5y6                  | 852.44  | 77.672  | 7891  | 1 | 852.44  | 14.39  |
| P0A2R4 RPOC_SALTY DNA-directed RNA polymerase subunit beta' | 35 |                                            | GEAIGVIAAQSIGEPGTQLTMRTF HIGGAASR    | 911  | 32 | 4 | 15.88 | b4y5y12y23              | 3196.68 | 114.159 | 5425  | 4 | 799.92  | 7.33   |
| P0A2R4 RPOC_SALTY DNA-directed RNA polymerase subunit beta' | 36 | Carbamidomethyl+C(4); Carbamidomethyl+C(7) | GVICEKCGVEVTQTK                      | 81   | 15 | 4 | 26.24 | b3b4b8°b8               | 1707.83 | 86.697  | 4166  | 3 | 569.95  | -7.51  |
| P0A2R4 RPOC_SALTY DNA-directed RNA polymerase subunit beta' | 37 |                                            | ENVIVGRLIPAGTGYAYHQDR                | 1348 | 21 | 3 | 23.54 | y5y6y13                 | 2329.22 | 133.439 | 2775  | 3 | 777.08  | 6.60   |
| P0A2R4 RPOC_SALTY DNA-directed RNA polymerase subunit beta' | 38 |                                            | VERGDVISDGPEAPHDILR                  | 1203 | 19 | 4 | 14.96 | b5°b5b8y7               | 2075.05 | 54.018  | 2536  | 4 | 519.52  | -0.82  |
| P0A2R4 RPOC_SALTY DNA-directed RNA polymerase subunit beta' | 39 |                                            | DIERVLYFESYVVIEGGMTNLER              | 133  | 23 | 3 | 13.06 | b10y7y10                | 2732.35 | 99.473  | 2206  | 4 | 683.84  | -5.27  |
| P0A2R4 RPOC_SALTY DNA-directed RNA polymerase subunit beta' | 40 | Phosphoryl STY(10)                         | MGHIELASPTAHIWFLK                    | 101  | 17 | 4 | 23.74 | b4b8°b8b10              | 2030.97 | 71.440  | 9542  | 3 | 677.66  | -7.51  |
| P0A2R4 RPOC_SALTY DNA-directed RNA polymerase subunit beta' | 41 | Phosphoryl STY(10)                         | QTDELTLGLSSLVVLDSAER                 | 1048 | 19 | 7 | 40.93 | b3°b3b17y6y8y11y15      | 2112.98 | 67.177  | 3147  | 4 | 529.00  | -6.01  |
| P0A2R4 RPOC_SALTY DNA-directed RNA polymerase subunit beta' | 42 | Phosphoryl STY(4)                          | TANSGYLTRR                           | 789  | 10 | 3 | 26.94 | b3b9_H3PO4 b9y8_HPO3 y8 | 1218.57 | 58.409  | 1834  | 2 | 609.79  | 12.92  |
| P0A2R4 RPOC_SALTY DNA-directed RNA polymerase subunit beta' | 43 | Oxidation+M(7)                             | VPYGAVMAK                            | 996  | 9  | 3 | 30.51 | b5y3y8                  | 951.51  | 44.215  | 41264 | 2 | 476.26  | 14.37  |
| P0A2R4 RPOC_SALTY DNA-directed RNA polymerase subunit beta' | 44 | Oxidation+M()                              | ALMMSTNNILSPANGEPHIIVPSQD VVLGLYYMTR | 481  | 34 | 3 | 10.99 | b10y5y13                | 3723.86 | 107.968 | 7323  | 3 | 1241.96 | -4.26  |
| P0A2R4 RPOC_SALTY DNA-directed RNA polymerase subunit beta' | 45 | Oxidation+M(4)                             | GEGMVLTPKEAER                        | 521  | 14 | 6 | 31.57 | b3°b3b6°b6b11y5         | 1489.74 | 97.597  | 3802  | 2 | 745.37  | 3.03   |
| Q8ZNV1 CMOB_SALTY tRNA (mo5U34)-methyltransferase           | 1  | Carbamidomethyl+C(5)                       | IADVCVTTTEEQR                        | 271  | 13 | 4 | 20.67 | b3b12y10y13             | 1521.73 | 67.227  | 34169 | 2 | 761.37  | 4.81   |
| Q8ZNV1 CMOB_SALTY tRNA (mo5U34)-methyltransferase           | 2  |                                            | QWSNAVEFLPEMPWR                      | 40   | 16 | 3 | 17.18 | b8b10y11                | 1990.94 | 71.254  | 9996  | 2 | 995.98  | -2.45  |
| Q8ZNV1 CMOB_SALTY tRNA (mo5U34)-methyltransferase           | 3  | Carbamidomethyl+C(7)                       | TILDVGCSGGYHLWR                      | 124  | 15 | 3 | 18.16 | b9b11y9                 | 1733.85 | 89.138  | 3209  | 2 | 867.43  | 2.53   |
| Q8ZNV1 CMOB_SALTY tRNA (mo5U34)-methyltransferase           | 4  |                                            | LDLLHSVTAESETPLSEGQLK                | 56   | 21 | 5 | 13.89 | b11y2y10y13°y13         | 2267.15 | 99.452  | 3122  | 2 | 1134.08 | -10.01 |

|                                                   |    |                       |                                |     |    |   |       |                      |         |         |       |   |         |        |
|---------------------------------------------------|----|-----------------------|--------------------------------|-----|----|---|-------|----------------------|---------|---------|-------|---|---------|--------|
| Q8ZNV1 CMOB_SALTY tRNA (mo5U34)-methyltransferase | 5  |                       | DQLVNEGELVLETLVIDGDENTV LVPGDR | 213 | 29 | 4 | 21.95 | b6y11*y11y12         | 3151.60 | 95.561  | 3059  | 3 | 1051.20 | -0.54  |
| Q8ZNV1 CMOB_SALTY tRNA (mo5U34)-methyltransferase | 6  |                       | NLMPWRK                        | 84  | 7  | 6 | 56.74 | b1b4b6y3y4y7         | 944.51  | 34.908  | 2822  | 2 | 472.76  | -1.55  |
| Q8ZNV1 CMOB_SALTY tRNA (mo5U34)-methyltransferase | 7  |                       | NHLSHWLETLPAQIASWQR            | 13  | 19 | 4 | 36.32 | b6y3y4y5             | 2287.13 | 72.290  | 25678 | 3 | 763.05  | -17.72 |
| Q8ZNV1 CMOB_SALTY tRNA (mo5U34)-methyltransferase | 8  |                       | TEWMVTESLADFLDPNDR             | 285 | 18 | 6 | 47.38 | y4y5°y5y6y8y12       | 2139.01 | 78.485  | 15969 | 3 | 713.67  | 18.15  |
| Q8ZNV1 CMOB_SALTY tRNA (mo5U34)-methyltransferase | 9  |                       | GPFSLYGVDIDTEWR                | 91  | 15 | 6 | 29.48 | b4y3°y3y4y6°y6       | 1754.81 | 74.621  | 10944 | 2 | 877.91  | -17.25 |
| Q8ZNV1 CMOB_SALTY tRNA (mo5U34)-methyltransferase | 10 |                       | AFDTVFSMGVLYHR                 | 188 | 14 | 4 | 31.57 | b6b8b10y3            | 1642.84 | 62.086  | 9342  | 3 | 548.28  | 19.69  |
| Q8ZNV1 CMOB_SALTY tRNA (mo5U34)-methyltransferase | 11 | Carbamidomethyl+C(20) | MIGAGAHLAVGIDPTQLFLCQFEA VR    | 139 | 26 | 4 | 12.15 | b8b11y9°y9           | 2814.43 | 91.776  | 4039  | 3 | 938.81  | -5.38  |
| Q8ZNV1 CMOB_SALTY tRNA (mo5U34)-methyltransferase | 12 |                       | SKTVEGYAPQR                    | 303 | 12 | 4 | 34.29 | b5b9b10y3            | 1332.69 | 56.259  | 27761 | 3 | 444.90  | -1.74  |
| Q8ZNV1 CMOB_SALTY tRNA (mo5U34)-methyltransferase | 13 |                       | GPFSLYGVDIDTEWRSDWK            | 91  | 19 | 9 | 64.73 | b4b8b9y4°y4y7y8y9y12 | 2271.07 | 81.947  | 3343  | 2 | 1136.04 | -1.08  |
| Q8ZNV1 CMOB_SALTY tRNA (mo5U34)-methyltransferase | 14 |                       | KGPFSLYGVDIDTEWR               | 90  | 16 | 3 | 25.56 | y8y10y11             | 1882.92 | 80.424  | 3004  | 2 | 941.97  | -4.86  |
| Q8ZNV1 CMOB_SALTY tRNA (mo5U34)-methyltransferase | 15 | Oxidation+M(1)        | MIEFGNFYQLIAK                  | 0   | 13 | 3 | 25.44 | b4b5y5               | 1589.80 | 51.643  | 25067 | 2 | 795.40  | -0.61  |
| Q8ZNV1 CMOB_SALTY tRNA (mo5U34)-methyltransferase | 16 | Oxidation+M(4)        | TEWMVTESLADFLDPNDR             | 285 | 18 | 4 | 15.6  | b3b6y10*y10          | 2154.98 | 102.992 | 6508  | 4 | 539.50  | 9.29   |
