# Supplementary material for: Phenotypic profile linked to inhibition of the major Zn influx system in Salmonella enterica : proteomics and ionomics investigations
Source: Royal Society of Chemistry journal article supplement (doi:10.1039/c0mb00140f), 2010-10-20
Supplement: c0mb00140f.zip [file c0mb00140f.zip]

SA123 LC-MS run 2: 123\_220709\_1a2\_02

| Protein name                              | Peptide Rank | Peptide Modification | Peptide Sequence      | Peptide sequence start | Peptide sequence Length | Peptide Matched Products | Peptide Score | By Matches                                                                                                                                                                         | Precursor MH+ (Da) | Retention time (min) | Intensity | z | Precursor m/z | MH+ Error (ppm) |
|-------------------------------------------|--------------|----------------------|-----------------------|------------------------|-------------------------|--------------------------|---------------|------------------------------------------------------------------------------------------------------------------------------------------------------------------------------------|--------------------|----------------------|-----------|---|---------------|-----------------|
| P0A1S2 HNS_SALTY DNA-binding protein H-NS | 1            |                      | EMLIADGIDPNELLNSMAAAK | 62                     | 21                      | 60                       | 384.93        | b2°b2b3°b3b4°b4b5°b5b6°b6b7°b7b8°b8b9b10°b10b11°b11b12°b12b13°b13b14°b14b15b17°b17b18b21y1y2y3y4y5y6°y6y7°y7°y7y8y9y10y11°y11y12°y12y13°y13°y13y14°y14y15°y15y16°y16y17°y17°y17y21 | 2216.10            | 96.924               | 623133    | 2 | 1108.55       | 1.10            |
| P0A1S2 HNS_SALTY DNA-binding protein H-NS | 2            |                      | YSYVDENGETK           | 96                     | 11                      | 11                       | 97.24         | b6y2y3y4y6y7y8y9°y9y10y11                                                                                                                                                          | 1304.56            | 33.613               | 96616     | 2 | 652.78        | -2.15           |
| P0A1S2 HNS_SALTY DNA-binding protein H-NS | 3            | Carbamidomethyl+C(2) | ECTLETLEEMLEK         | 19                     | 13                      | 9                        | 56.74         | y1y5y6y8°y8y9°y9y10y13                                                                                                                                                             | 1624.75            | 92.946               | 75391     | 2 | 812.88        | 5.94            |
| P0A1S2 HNS_SALTY DNA-binding protein H-NS | 4            |                      | REEESAAAAEVEER        | 40                     | 14                      | 6                        | 26.24         | b2°b2b6b8y9y11                                                                                                                                                                     | 1575.73            | 33.410               | 24733     | 2 | 788.37        | 3.18            |
| P0A1S2 HNS_SALTY DNA-binding protein H-NS | 5            |                      | LEVVVNER              | 32                     | 8                       | 10                       | 39.72         | y2°y2y3°y3°y3y6y7°y7°y7y8                                                                                                                                                          | 957.53             | 42.971               | 15522     | 2 | 479.27        | -8.67           |
| P0A1S2 HNS_SALTY DNA-binding protein H-NS | 6            |                      | MSEALK                | 0                      | 6                       | 1                        | 13.24         | y4                                                                                                                                                                                 | 678.35             | 49.190               | 10583     | 1 | 678.35        | -4.23           |
| P0A1S2 HNS_SALTY DNA-binding protein H-NS | 7            |                      | EEESAAAAEVEER         | 41                     | 13                      | 9                        | 57.1          | b8b10y3°y3y4°y4y9°y9y10                                                                                                                                                            | 1419.63            | 35.237               | 7522      | 2 | 710.32        | 4.82            |
| P0A1S2 HNS_SALTY DNA-binding protein H-NS | 8            |                      | TPAVIK                | 114                    | 6                       | 2                        | 29.04         | y3y5                                                                                                                                                                               | 628.39             | 27.654               | 3061      | 2 | 314.70        | -13.60          |
| P0A1S2 HNS_SALTY DNA-binding protein H-NS | 9            |                      | YSYVDENGETKTWTGQGR    | 96                     | 18                      | 5                        | 51.18         | y6y13y14y15y16                                                                                                                                                                     | 2090.93            | 47.700               | 191422    | 3 | 697.65        | -6.07           |
| P0A1S2 HNS_SALTY DNA-binding protein H-NS | 10           | Carbamidomethyl+C(2) | ECTLETLEEMLEKLEVVVNER | 19                     | 21                      | 3                        | 21.7          | b12y3y4                                                                                                                                                                            | 2563.28            | 125.550              | 1773      | 2 | 1282.14       | 7.62            |
| P0A1H5 EFTU_SALTY Elongation factor Tu    | 1            |                      | AIDKPFLLPIDVFSISGR    | 205                    | 19                      | 17                       | 127.83        | b3b7b8b12y2y3y4y5y6y7y8y9°y9y11y15°y15y19                                                                                                                                          | 2117.14            | 105.632              | 488503    | 3 | 706.39        | -9.23           |
| P0A1H5 EFTU_SALTY Elongation factor Tu    | 2            |                      | ELLSQYDFPGDDTPIVR     | 155                    | 17                      | 32                       | 274.02        | b2°b2b3°b3b5°b5b6°b6b8°b8b9b12b13°b13b15b16y1y2y3y4y5y6y8y9°y9y10y11y12y13y14y15y17                                                                                                | 1964.96            | 76.780               | 342338    | 2 | 982.98        | 1.12            |
| P0A1H5 EFTU_SALTY Elongation factor Tu    | 3            |                      | GITINTSHVEYDTPTR      | 59                     | 16                      | 29                       | 200.94        | b2b3°b3b7b8°b8°b8b10b12b16y3y4y5°y5y6°y6y7°y7y8°y8y9y10y11y12°y12y13y14°y14y16                                                                                                     | 1803.87            | 50.218               | 299637    | 3 | 601.96        | -11.03          |
| P0A1H5 EFTU_SALTY Elongation factor Tu    | 4            |                      | TTLTAAITTVLAK         | 25                     | 13                      | 10                       | 65.27         | b2°b2b5°b5y1y3y5y6y8y11                                                                                                                                                            | 1303.78            | 84.605               | 292891    | 2 | 652.39        | -5.99           |
| P0A1H5 EFTU_SALTY Elongation factor Tu    | 5            |                      | IIELAGFLDSYIPEPER     | 188                    | 17                      | 28                       | 251.23        | b2b3b4b5b7b9b11°b11b12°b12b14y2y3y4°y4y5y6y7y8°y8y10°y10y11y12y13y14y15y17                                                                                                         | 1962.03            | 102.156              | 288007    | 2 | 981.52        | 2.80            |
| P0A1H5 EFTU_SALTY Elongation factor Tu    | 6            |                      | AGENVGVLLR            | 270                    | 10                      | 12                       | 85.76         | b4°b4b5°b5y1y2y3y4y5y6y7y10                                                                                                                                                        | 1027.58            | 56.842               | 264393    | 2 | 514.29        | -13.42          |

|                                           |    |                      |                                        |     |    |    |        |                                                                                                                                         |         |         |        |   |         |        |
|-------------------------------------------|----|----------------------|----------------------------------------|-----|----|----|--------|-----------------------------------------------------------------------------------------------------------------------------------------|---------|---------|--------|---|---------|--------|
| P0A1H5 EFTU_SALTY Elongation factor<br>Tu | 7  |                      | TTDVTGTIELPEGVEMVMPGDNI<br>K           | 334 | 24 | 40 | 246.46 | b2°b2b3°b3b4°b4b5°b5b10°<br>b10b11b12b13b14b15b17<br>b18y3y4y5y6°y6°y6y7°y7*<br>y7y8y9°y9y10°y10°y10y12<br>*y12y14y15°y15y20y24*y2<br>4 | 2546.25 | 86.594  | 252735 | 2 | 1273.63 | 5.37   |
| P0A1H5 EFTU_SALTY Elongation factor<br>Tu | 8  |                      | QVGVPIIVFLNK                           | 124 | 13 | 10 | 57.1   | b3b4°b4b13y14y5y9y11y<br>13                                                                                                             | 1489.88 | 99.304  | 227090 | 2 | 745.44  | 0.00   |
| P0A1H5 EFTU_SALTY Elongation factor<br>Tu | 9  | Carbamidomethyl+C(3) | STCTGVEMFR                             | 253 | 10 | 9  | 66.2   | b2°b2b10y3y4y6y7y8y10                                                                                                                   | 1187.51 | 53.501  | 113367 | 2 | 594.26  | -3.50  |
| P0A1H5 EFTU_SALTY Elongation factor<br>Tu | 10 |                      | ALEGDAEWEAK                            | 177 | 11 | 12 | 84.45  | b1b2b3y1y3°y3y4y5y6y8y9<br>y11                                                                                                          | 1218.56 | 47.123  | 86621  | 2 | 609.79  | -0.40  |
| P0A1H5 EFTU_SALTY Elongation factor<br>Tu | 11 | Carbamidomethyl+C(1) | CDMVDDEELLELVEMEV                      | 137 | 18 | 16 | 93.1   | b2b3b12b13y2y3°y3y4y5y<br>7°y7y8°y8y9y14y18                                                                                             | 2224.00 | 106.327 | 52995  | 2 | 1112.50 | 9.11   |
| P0A1H5 EFTU_SALTY Elongation factor<br>Tu | 12 |                      | MVVTLIHPIAMDDGLR                       | 358 | 16 | 18 | 174.47 | b3b4°b4b5°b5y3y4y5y7y8y<br>9y10°y10y11y12°y12y13y1<br>4                                                                                 | 1780.92 | 79.266  | 740413 | 3 | 594.31  | -16.52 |
| P0A1H5 EFTU_SALTY Elongation factor<br>Tu | 13 |                      | TVGAGVVAK                              | 382 | 9  | 11 | 110.16 | b3°b3b4b6°b6b7°b7y3y5y7<br>y8                                                                                                           | 801.47  | 29.035  | 187663 | 2 | 401.24  | -19.95 |
| P0A1H5 EFTU_SALTY Elongation factor<br>Tu | 14 |                      | TKPHVNVGTIGHVDHGK                      | 8   | 17 | 5  | 26.18  | b6y3y5°y5y6                                                                                                                             | 1795.92 | 42.971  | 23404  | 4 | 449.74  | -20.87 |
| P0A1H5 EFTU_SALTY Elongation factor<br>Tu | 15 | Carbamidomethyl+C(7) | HYAHVDCPGHADYVK                        | 75  | 15 | 3  | 17.27  | b6b11y7                                                                                                                                 | 1768.82 | 94.896  | 20382  | 2 | 884.91  | 20.29  |
| P0A1H5 EFTU_SALTY Elongation factor<br>Tu | 16 |                      | LLDEGR                                 | 264 | 6  | 4  | 38.83  | b5y3°y3y4                                                                                                                               | 702.38  | 27.270  | 15090  | 1 | 702.38  | -2.78  |
| P0A1H5 EFTU_SALTY Elongation factor<br>Tu | 17 |                      | NMITGAAQMDGAILVVAATDGP<br>MPQTR        | 90  | 27 | 3  | 11.52  | b9b15y5                                                                                                                                 | 2729.29 | 105.978 | 10377  | 3 | 910.44  | -18.25 |
| P0A1H5 EFTU_SALTY Elongation factor<br>Tu | 18 |                      | GIHK                                   | 234 | 4  | 1  | 12.35  | y3                                                                                                                                      | 430.30  | 45.735  | 8641   | 1 | 430.30  | 2.34   |
| P0A1H5 EFTU_SALTY Elongation factor<br>Tu | 19 |                      | EEIER                                  | 284 | 5  | 2  | 25.59  | b3y4                                                                                                                                    | 675.33  | 64.776  | 7224   | 1 | 675.33  | 0.72   |
| P0A1H5 EFTU_SALTY Elongation factor<br>Tu | 20 |                      | VGEEVEIVGIK                            | 238 | 11 | 7  | 35.27  | b3°b3b4°b4b10°b10y4                                                                                                                     | 1171.66 | 45.671  | 6585   | 2 | 586.34  | 5.63   |
| P0A1H5 EFTU_SALTY Elongation factor<br>Tu | 21 |                      | HTPFFK                                 | 319 | 6  | 2  | 13.24  | y5°y5                                                                                                                                   | 776.42  | 34.410  | 3503   | 1 | 776.42  | 10.93  |
| P0A1H5 EFTU_SALTY Elongation factor<br>Tu | 22 |                      | GSALKALEGDAEWEAK                       | 172 | 16 | 4  | 33.82  | y7y12y13y15                                                                                                                             | 1674.83 | 82.435  | 6384   | 3 | 558.95  | -2.33  |
| P0A1H5 EFTU_SALTY Elongation factor<br>Tu | 23 | Oxidation+M(23)      | NMITGAAQMDGAILVVAATDGP<br>MPQTREHILLGR | 90  | 34 | 4  | 16.62  | b3b15°b15b17                                                                                                                            | 3563.76 | 92.962  | 2824   | 3 | 1188.59 | -14.93 |
| P0A1H5 EFTU_SALTY Elongation factor<br>Tu | 24 | Oxidation+M()        | TTDVTGTIELPEGVEMVMPGDNI<br>K           | 334 | 24 | 4  | 22.5   | b3b5b6y13                                                                                                                               | 2562.24 | 77.616  | 2423   | 2 | 1281.63 | 4.95   |
| P0A1H5 EFTU_SALTY Elongation factor<br>Tu | 25 | Oxidation+M(9)       | NMITGAAQMDGAILVVAATDGP<br>MPQTR        | 90  | 27 | 6  | 14.52  | b7b15°b15y8°y8y13                                                                                                                       | 2745.37 | 128.473 | 2360   | 3 | 915.80  | 13.70  |
| P0A1H5 EFTU_SALTY Elongation factor<br>Tu | 26 |                      | TGTIELPEGVEMVMPGDNIK                   | 338 | 20 | 4  | 27.38  | b8b10b11b18                                                                                                                             | 2130.04 | 86.555  | 14869  | 2 | 1065.52 | -4.93  |
| P0A1H5 EFTU_SALTY Elongation factor<br>Tu | 27 |                      | TINTSHVEYDTPTR                         | 61  | 14 | 6  | 24.7   | b4°b4b10°b10b11°b11                                                                                                                     | 1633.79 | 50.198  | 10651  | 2 | 817.40  | 4.48   |
| P0A1H5 EFTU_SALTY Elongation factor<br>Tu | 28 |                      | TTDVTGTIELPEGVEM                       | 334 | 16 | 4  | 22.49  | y3°y3y4y14                                                                                                                              | 1691.78 | 86.501  | 5675   | 3 | 564.60  | -13.85 |
| P0A1H5 EFTU_SALTY Elongation factor<br>Tu | 29 |                      | TTDVTGTIELPEGVEMVMPGD                  | 334 | 21 | 2  | 8.46   | y3°y3                                                                                                                                   | 2191.02 | 86.584  | 5460   | 2 | 1096.01 | 1.45   |
| P0A1H5 EFTU_SALTY Elongation factor<br>Tu | 30 |                      | GITINTSHVEYDTPTR                       | 59  | 16 | 1  | 7.27   | b13                                                                                                                                     | 1785.88 | 50.183  | 16301  | 3 | 595.96  | 3.55   |

|                                             |    |                       |                                      |     |    |    |        |                                                                                                                |         |         |        |   |         |        |
|---------------------------------------------|----|-----------------------|--------------------------------------|-----|----|----|--------|----------------------------------------------------------------------------------------------------------------|---------|---------|--------|---|---------|--------|
| P64076 ENO_SALTY Enolase                    | 1  |                       | FNQIGSLTETLAAIK                      | 342 | 15 | 34 | 239.76 | b2*b2b3*b3b4*b4b5b6*b6*b6b7*b7b12b13*b13b14*b14y1y2y3y4y5y6y7y8y9y10y11*y11y12y13*y13y15*y15                   | 1605.88 | 85.723  | 533935 | 2 | 803.45  | -0.30  |
| P64076 ENO_SALTY Enolase                    | 2  |                       | SGETEDATIADLAVGTAAGQIK               | 371 | 22 | 40 | 324.44 | b2b3b4b5b8*b8b9*b9b11b12*b12b13*b13b14b15b16°b16b17b18*b18b22y1y2y3y4y5*y5y6y7y8y9y10y11y12y13y14*y14y16y17y22 | 2118.06 | 75.285  | 275171 | 2 | 1059.54 | 3.34   |
| P64076 ENO_SALTY Enolase                    | 3  |                       | GMNTAVGDEGGYAPNLGSNAEALAVIAEAVK      | 200 | 31 | 27 | 172.63 | b2b3b4b5*b5b6*b6*b6b13b30y1y2y3y4y5°y5y6y7y8y10y11y14y15y18y19y25y31                                           | 2989.46 | 95.031  | 200355 | 3 | 997.16  | 2.37   |
| P64076 ENO_SALTY Enolase                    | 4  |                       | YSMPVPMMNININGGEHADNNVDIQEFMIQPVGAK  | 143 | 34 | 22 | 104.21 | b2°b2b3°b3b13b14b23y2y3y5y6*y6y7y8y9y10°y10*y10y13y29y31y34                                                    | 3759.78 | 98.694  | 148421 | 3 | 1253.93 | 3.31   |
| P64076 ENO_SALTY Enolase                    | 5  |                       | AVGAVNGPIAQAILGK                     | 66  | 16 | 10 | 77.49  | b2b3b4b5y3y5y6y7y12y16                                                                                         | 1478.87 | 75.138  | 147793 | 2 | 739.94  | -0.58  |
| P64076 ENO_SALTY Enolase                    | 6  |                       | GIANSILIK                            | 333 | 9  | 5  | 37.15  | y2y3y4y7y9                                                                                                     | 928.57  | 61.155  | 135100 | 2 | 464.79  | -13.87 |
| P64076 ENO_SALTY Enolase                    | 7  |                       | DAGYTAVISHR                          | 360 | 11 | 14 | 98.04  | b2°b2b3b4y2y3°y3y4y5y6y7y9°y9y11                                                                               | 1189.59 | 42.052  | 121891 | 2 | 595.30  | -5.03  |
| P64076 ENO_SALTY Enolase                    | 8  |                       | IQLVGDDLFVTNTK                       | 311 | 14 | 16 | 102.34 | b2b3b4y1y2y4y5y6°y6*y6y9y10y11y12*y12y14                                                                       | 1562.84 | 77.602  | 97227  | 2 | 781.92  | -0.39  |
| P64076 ENO_SALTY Enolase                    | 9  |                       | GMPLYEHIAELNGTPGK                    | 126 | 17 | 5  | 26.18  | b2b8y3y4y10                                                                                                    | 1826.90 | 67.602  | 81559  | 3 | 609.64  | -8.42  |
| P64076 ENO_SALTY Enolase                    | 10 |                       | QYPIVSIEDGLDESDWDGFAYQTK             | 282 | 24 | 11 | 37.43  | b2b4*b4b9°b9b10b16y6y8y10y24                                                                                   | 2776.28 | 93.746  | 70553  | 3 | 926.10  | 6.07   |
| P64076 ENO_SALTY Enolase                    | 11 |                       | IEEALGEK                             | 411 | 8  | 5  | 39.72  | y3y6°y6y7y8                                                                                                    | 888.46  | 31.767  | 35371  | 2 | 444.73  | -9.07  |
| P64076 ENO_SALTY Enolase                    | 12 | Carbamidomethyl+C(16) | AAGYELGKIDITLAMDCAASEFYKDGK          | 231 | 26 | 7  | 11.72  | b2b9b11°b11y1y8y26                                                                                             | 2824.32 | 138.215 | 9429   | 3 | 942.11  | 1.04   |
| P64076 ENO_SALTY Enolase                    | 13 |                       | AAGYELGK                             | 231 | 8  | 4  | 23.91  | b1y5y6°y6                                                                                                      | 808.43  | 47.079  | 8613   | 2 | 404.72  | 6.42   |
| P64076 ENO_SALTY Enolase                    | 14 |                       | EIDSR                                | 10  | 6  | 2  | 26.03  | y3y4                                                                                                           | 732.40  | 27.119  | 36019  | 1 | 732.40  | 8.67   |
| P64076 ENO_SALTY Enolase                    | 15 |                       | IMIDLDGTENK                          | 92  | 11 | 3  | 23.27  | b6y4y7                                                                                                         | 1248.62 | 110.834 | 15935  | 2 | 624.81  | 2.35   |
| P64076 ENO_SALTY Enolase                    | 16 |                       | VIGR                                 | 6   | 4  | 1  | 12.35  | y3                                                                                                             | 444.30  | 50.852  | 9058   | 1 | 444.30  | 11.26  |
| P64076 ENO_SALTY Enolase                    | 17 |                       | EALELR                               | 46  | 6  | 1  | 13.24  | b5                                                                                                             | 730.41  | 23.394  | 4161   | 1 | 730.41  | -4.85  |
| P64076 ENO_SALTY Enolase                    | 18 |                       | VLGDKIQLVGDDLFVTNTK                  | 306 | 19 | 6  | 48.32  | b4y3y4*y4y5y6                                                                                                  | 2075.12 | 80.033  | 213603 | 3 | 692.38  | -8.71  |
| P64076 ENO_SALTY Enolase                    | 19 |                       | GKGMNTAVGDEGGYAPNLGSNAEALAVIAEAVK    | 198 | 33 | 5  | 23.57  | b7b8b15b17y4                                                                                                   | 3174.58 | 90.020  | 39808  | 3 | 1058.86 | 0.92   |
| P64076 ENO_SALTY Enolase                    | 20 |                       | EALELRDGDK                           | 46  | 10 | 3  | 25.84  | b3b9y9                                                                                                         | 1145.57 | 54.890  | 8988   | 2 | 573.29  | -7.57  |
| P64076 ENO_SALTY Enolase                    | 21 |                       | QYPIVSIEDGLDESDWDGFAYQTKVLGDK        | 282 | 29 | 3  | 11.23  | b9y6y14                                                                                                        | 3288.57 | 58.642  | 6250   | 4 | 822.90  | 3.04   |
| P64076 ENO_SALTY Enolase                    | 22 |                       | GVTKAVGAVNGPIAQAILGK                 | 62  | 20 | 3  | 13.7   | b13b17y19                                                                                                      | 1864.08 | 136.771 | 2022   | 1 | 1864.08 | -13.49 |
| P64076 ENO_SALTY Enolase                    | 23 | Oxidation+M(18)       | GNPTVEAEVHLEGGFVGMAAAPSGASTGSREALELR | 16  | 36 | 3  | 16.55  | b4b6b8                                                                                                         | 3583.78 | 101.720 | 4953   | 3 | 1195.26 | 9.95   |
| P64076 ENO_SALTY Enolase                    | 24 |                       | GYTAVISHR                            | 362 | 9  | 2  | 18.26  | b3b8                                                                                                           | 1003.53 | 42.073  | 65761  | 2 | 502.27  | -1.95  |
| P64076 ENO_SALTY Enolase                    | 25 |                       | ANSILIK                              | 335 | 7  | 2  | 8.55   | b4°b4                                                                                                          | 758.47  | 61.143  | 19573  | 1 | 758.47  | -5.63  |
| P64076 ENO_SALTY Enolase                    | 26 |                       | AGYTAVISHR                           | 361 | 10 | 2  | 18.26  | b3b6                                                                                                           | 1074.56 | 42.025  | 9562   | 2 | 537.79  | -5.91  |
| P64076 ENO_SALTY Enolase                    | 27 |                       | GMNTAVGDEGGYAPNLGSNAEALAVI           | 200 | 26 | 0  | 11.57  |                                                                                                                | 2491.20 | 94.993  | 2349   | 3 | 831.07  | 7.55   |
| P64076 ENO_SALTY Enolase                    | 28 |                       | YSMPVPMMNININGGEHA                   | 143 | 17 | 3  | 12.71  | y9°y9y13                                                                                                       | 1860.87 | 98.745  | 2115   | 3 | 620.96  | 13.32  |
| P64076 ENO_SALTY Enolase                    | 29 |                       | DAGYTAVISHR                          | 360 | 11 | 1  | 7.68   | b9                                                                                                             | 1171.58 | 42.029  | 4176   | 3 | 391.20  | -0.94  |
| POA297 RL10_SALTY 50S ribosomal protein L10 | 1  |                       | LATLPTYEEAIAR                        | 125 | 13 | 16 | 123.05 | b2b3°b3b4b13y1y4y6y7y8y9°y9y10y11y12y13                                                                        | 1447.78 | 65.330  | 137919 | 2 | 724.39  | -1.26  |

|                                             |    |                      |                                   |     |    |    |        |                                                                                          |         |         |        |   |         |        |
|---------------------------------------------|----|----------------------|-----------------------------------|-----|----|----|--------|------------------------------------------------------------------------------------------|---------|---------|--------|---|---------|--------|
| P0A297 RL10_SALTY 50S ribosomal protein L10 | 2  |                      | AAAFEGELIPASQIDR                  | 109 | 16 | 17 | 144.99 | b4b5°b5b8b9b12y5°y5y6y7y8y9y10y11y12°y12y16                                              | 1687.87 | 68.847  | 92979  | 2 | 844.44  | 3.11   |
| P0A297 RL10_SALTY 50S ribosomal protein L10 | 3  |                      | GALSAVVADSR                       | 20  | 11 | 7  | 68.64  | b10y2y3y4y5y6y8                                                                          | 1045.56 | 49.257  | 68933  | 2 | 523.28  | -3.85  |
| P0A297 RL10_SALTY 50S ribosomal protein L10 | 4  |                      | TLAAVRDAKEAA                      | 153 | 12 | 7  | 25.26  | b6y1y8°y8y9°y9y12                                                                        | 1215.66 | 33.537  | 10142  | 2 | 608.33  | -7.73  |
| P0A297 RL10_SALTY 50S ribosomal protein L10 | 5  |                      | DTFVGPTLIAYSMEHPGAAAR             | 73  | 21 | 6  | 28.28  | b4b5°b5b8y10y12                                                                          | 2204.10 | 82.608  | 9432   | 3 | 735.37  | 9.19   |
| P0A297 RL10_SALTY 50S ribosomal protein L10 | 6  |                      | TLAAVR                            | 153 | 6  | 1  | 13.24  | b4                                                                                       | 630.38  | 27.409  | 4423   | 1 | 630.38  | -15.10 |
| P0A297 RL10_SALTY 50S ribosomal protein L10 | 7  | Carbamidomethyl+C(9) | VVEGTQFECLKDFTVGPTLIAYSM EHPGAAAR | 62  | 32 | 4  | 21.09  | b8y12y13y16                                                                              | 3494.68 | 92.397  | 51895  | 4 | 874.43  | -7.54  |
| P0A297 RL10_SALTY 50S ribosomal protein L10 | 8  |                      | AAAFEGELIPASQIDRLATLPTYEE AIAR    | 109 | 29 | 6  | 23.08  | b10°b10y4y6y9y11                                                                         | 3116.62 | 93.017  | 44195  | 3 | 1039.55 | -1.80  |
| P0A297 RL10_SALTY 50S ribosomal protein L10 | 9  |                      | GVTVDKMTCLR                       | 31  | 11 | 3  | 23.27  | b5b9y5                                                                                   | 1248.64 | 59.552  | 19975  | 2 | 624.83  | -13.49 |
| P0A297 RL10_SALTY 50S ribosomal protein L10 | 10 |                      | FEVKAAAFEGELIPASQIDR              | 105 | 20 | 5  | 21.53  | b10°b10y7y9y13                                                                           | 2191.12 | 85.003  | 14954  | 3 | 731.05  | -8.36  |
| P0A297 RL10_SALTY 50S ribosomal protein L10 | 11 |                      | EFAKANAK                          | 97  | 8  | 4  | 47.74  | b5b6b7y5                                                                                 | 878.48  | 36.901  | 8475   | 2 | 439.74  | 3.96   |
| P0A1D5 CH10_SALTY 10 kDa chaperonin         | 1  |                      | ILDNGTVQPLDVK                     | 47  | 13 | 32 | 221.06 | b2b3b5°b5b6b7°b7°b7b8°b8b10b11°b11°b11b12°b12b13y1y2y3y4y5y7y8y9y10y11°y11°y11y12°y12y13 | 1411.78 | 57.723  | 343160 | 2 | 706.39  | -2.85  |
| P0A1D5 CH10_SALTY 10 kDa chaperonin         | 2  |                      | VGDIVIFNDGYGVK                    | 60  | 14 | 24 | 181.15 | b3b4°b4b5°b5b11°b11°b11b13°b13y1y2y3y4y5y6°y6y7y8y9y10y11y12y14                          | 1495.78 | 73.542  | 305745 | 2 | 748.39  | -0.73  |
| P0A1D5 CH10_SALTY 10 kDa chaperonin         | 3  |                      | SAGGIVLTGSAAGK                    | 20  | 14 | 20 | 149.76 | b2°b2b3°b3b4b5°b5b6b14y2y3y4y6y7y8°y8y9y11y12y14                                         | 1188.65 | 44.201  | 202581 | 2 | 594.83  | -6.06  |
| P0A1D5 CH10_SALTY 10 kDa chaperonin         | 4  |                      | GEIIAVGK                          | 37  | 8  | 8  | 60.54  | b2b3y2y3y4y5y6y8                                                                         | 786.47  | 42.124  | 43393  | 1 | 786.47  | -5.98  |
| P0A1D5 CH10_SALTY 10 kDa chaperonin         | 5  |                      | IDNEEVLIMSESILAIVEA               | 77  | 20 | 8  | 44.73  | b4°b4b9°b9b10b11b15y11                                                                   | 2203.08 | 70.643  | 12484  | 3 | 735.03  | -10.75 |
| P0A1D5 CH10_SALTY 10 kDa chaperonin         | 6  |                      | SEKIDNEEVLIMSESILAIVEA            | 74  | 23 | 5  | 19.15  | b9y4y10y12°y12                                                                           | 2547.24 | 136.279 | 5136   | 2 | 1274.12 | -14.66 |
| P0A1D5 CH10_SALTY 10 kDa chaperonin         | 7  |                      | SAGGIVLTGSAAGK                    | 20  | 14 | 0  | 4      |                                                                                          | 1170.64 | 44.193  | 29305  | 2 | 585.82  | -3.65  |
| P0A7W4 RS5_SALTY 30S ribosomal protein S5   | 1  |                      | VFMQPASEGTHIAGGAMR                | 93  | 19 | 24 | 246.34 | b2b3b4b6b10b11b12b13b14b15b18y4y5y6y7y9y10y11y12y13y15°y15y17y19                         | 1892.94 | 68.230  | 272976 | 2 | 946.97  | 2.58   |
| P0A7W4 RS5_SALTY 30S ribosomal protein S5   | 2  |                      | AYGSTNPINVVR                      | 126 | 12 | 19 | 130.84 | b2b3b4°b4b6°b6y2y3y4°y4y5y6y7y8y9°y9°y9y10y12                                            | 1290.68 | 51.706  | 265280 | 2 | 645.84  | -2.84  |
| P0A7W4 RS5_SALTY 30S ribosomal protein S5   | 3  |                      | ATIDGLENMNSPEMVAAGR               | 138 | 19 | 17 | 153.31 | b2b13y3y4y5y6y8y9y10y11°y11°y11y12°y12y13y16y17                                          | 2046.98 | 59.378  | 147952 | 3 | 683.00  | -9.24  |
| P0A7W4 RS5_SALTY 30S ribosomal protein S5   | 4  |                      | ATIDGLENMNSPEMVAAG                | 138 | 18 | 22 | 172.22 | b2b4b8b11b14b15b16y2y3y4y5y7y10y11y12°y12°y12y13y14y15y18°y18                            | 1890.90 | 63.501  | 135820 | 2 | 945.95  | 3.62   |
| P0A7W4 RS5_SALTY 30S ribosomal protein S5   | 5  |                      | SVEEILGK                          | 159 | 8  | 4  | 34.95  | b4y3y6y8                                                                                 | 874.48  | 50.996  | 94063  | 2 | 437.74  | -12.14 |
| P0A7W4 RS5_SALTY 30S ribosomal protein S5   | 6  |                      | VGFGYGK                           | 45  | 7  | 6  | 39.27  | b1y2y3y4y6y7                                                                             | 727.37  | 40.645  | 59236  | 2 | 364.19  | -14.10 |

|                                                      |    |                 |                          |     |    |    |        |                                                        |         |         |        |   |         |        |
|------------------------------------------------------|----|-----------------|--------------------------|-----|----|----|--------|--------------------------------------------------------|---------|---------|--------|---|---------|--------|
| P0A7W4 RS5_SALTY 30S ribosomal protein S5            | 7  |                 | IFSFTALTVVGDGNR          | 29  | 16 | 5  | 38.59  | y6y7y8y12y16                                           | 1653.86 | 86.433  | 49276  | 2 | 827.43  | -1.48  |
| P0A7W4 RS5_SALTY 30S ribosomal protein S5            | 8  |                 | AVLEVAGVHNVLAK           | 112 | 14 | 9  | 76.82  | b3b4°b4b5b11y6y8y9y10                                  | 1419.80 | 61.025  | 259126 | 3 | 473.94  | -21.92 |
| P0A7W4 RS5_SALTY 30S ribosomal protein S5            | 9  |                 | LIAVNR                   | 14  | 6  | 5  | 38.83  | y3*y3y4y5*y5                                           | 685.43  | 33.557  | 27616  | 1 | 685.43  | -2.40  |
| P0A7W4 RS5_SALTY 30S ribosomal protein S5            | 10 |                 | NMINVALNNGTLQHPVK        | 69  | 17 | 3  | 15.53  | b7b10y10                                               | 1862.97 | 63.382  | 24696  | 3 | 621.66  | -9.44  |
| P0A7W4 RS5_SALTY 30S ribosomal protein S5            | 11 |                 | IFSFTALTVVGDGNRGVFGYGK   | 29  | 23 | 5  | 16.51  | b6b15°b15y3y5                                          | 2362.20 | 94.919  | 2271   | 2 | 1181.60 | -8.68  |
| P0A7W4 RS5_SALTY 30S ribosomal protein S5            | 12 | Oxidation+M(18) | VFMQPASEGTGIIAGGAMR      | 93  | 19 | 3  | 14.23  | b4b6y15                                                | 1908.94 | 61.861  | 4635   | 2 | 954.97  | 2.81   |
| P0A2A3 RL1_SALTY 50S ribosomal protein L1            | 1  |                 | VVGQLGQVLGPR             | 122 | 12 | 12 | 110.48 | b2b4b5y3y4y6y7y8y9y10*y10y12                           | 1222.72 | 59.490  | 188334 | 2 | 611.86  | -6.39  |
| P0A2A3 RL1_SALTY 50S ribosomal protein L1            | 2  |                 | VAVFTQGPNAEAAK           | 74  | 14 | 17 | 106.6  | b3y2y3y4y7y8°y8y9°y9*y9y10*y10y11°y11*y11y12y14        | 1402.73 | 45.816  | 178013 | 2 | 701.87  | 0.00   |
| P0A2A3 RL1_SALTY 50S ribosomal protein L1            | 3  |                 | VGTVTPNVAEAVK            | 141 | 13 | 20 | 142.32 | b2b3°b3b4°b4b12y3y4°y4y5y7y8y9y10y11°y11y12°y12*y12y13 | 1284.71 | 48.554  | 171341 | 2 | 642.86  | -3.52  |
| P0A2A3 RL1_SALTY 50S ribosomal protein L1            | 4  |                 | QYDINEAIALLK             | 19  | 12 | 6  | 48.27  | b12y3y4y5y6y12                                         | 1390.76 | 85.361  | 65339  | 2 | 695.88  | 0.88   |
| P0A2A3 RL1_SALTY 50S ribosomal protein L1            | 5  |                 | GATVLPHTGR               | 60  | 11 | 5  | 49.08  | y4y5y6y7y11                                            | 1065.57 | 30.545  | 39665  | 2 | 533.29  | -5.73  |
| P0A2A3 RL1_SALTY 50S ribosomal protein L1            | 6  |                 | AAGAELVGMEDLADQIK        | 88  | 17 | 10 | 65.11  | b3b6b7b9y4y9y10°y10y11y17                              | 1730.87 | 79.757  | 36925  | 2 | 865.94  | 2.47   |
| P0A2A3 RL1_SALTY 50S ribosomal protein L1            | 7  |                 | GEMNFDVVIASPDAMR         | 106 | 16 | 12 | 83.69  | b2b3b10b12°b12b13b14b15y4y12y13°y13                    | 1751.80 | 71.872  | 15047  | 3 | 584.60  | -7.46  |
| P0A2A3 RL1_SALTY 50S ribosomal protein L1            | 8  |                 | VSISTTMGAGVAVDQAGLSASAN  | 211 | 23 | 3  | 18.91  | b11b13b17                                              | 2107.01 | 74.693  | 3638   | 3 | 703.01  | -12.98 |
| P0A2A3 RL1_SALTY 50S ribosomal protein L1            | 9  |                 | FNESVDVAVNLGIDAR         | 37  | 16 | 5  | 33.76  | b7b8b12y4y7                                            | 1718.88 | 136.280 | 2057   | 2 | 859.94  | 3.34   |
| P0A2A3 RL1_SALTY 50S ribosomal protein L1            | 10 |                 | KVSISTTMGAGVAVDQAGLSASAN | 210 | 24 | 6  | 54.84  | y5y11y13y14y15y16                                      | 2235.13 | 70.470  | 2024   | 3 | 745.72  | 2.40   |
| P0A2A3 RL1_SALTY 50S ribosomal protein L1            | 11 |                 | TVLPHGTGR                | 62  | 9  | 0  | 2.67   |                                                        | 937.51  | 30.543  | 32200  | 2 | 469.26  | -7.75  |
| Q7CQ05 GRCA_SALTY Autonomous glycyl radical cofactor | 1  |                 | SGFAEDEVVAVSK            | 35  | 13 | 11 | 54.09  | b2b3b5y1y2°y2y3y8y9y10y13                              | 1337.65 | 54.839  | 220468 | 2 | 669.33  | -5.29  |
| Q7CQ05 GRCA_SALTY Autonomous glycyl radical cofactor | 2  |                 | MITGIQITK                | 0   | 9  | 10 | 76.79  | b1b3b4y2y3y4*y4y6y7y9                                  | 1004.57 | 55.443  | 219103 | 2 | 502.79  | -11.85 |
| Q7CQ05 GRCA_SALTY Autonomous glycyl radical cofactor | 3  |                 | FNSLTPEQQR               | 106 | 10 | 16 | 84.8   | b2*b2b3°b3b10y3*y3y4y5*y5y6y7y8°y8y10*y10              | 1219.60 | 38.686  | 151403 | 2 | 610.30  | -5.50  |
| Q7CQ05 GRCA_SALTY Autonomous glycyl radical cofactor | 4  |                 | EIPMEVKPEVR              | 55  | 11 | 13 | 76.67  | b2°b2b4b9b10y1y2y4y6y8°y8y9y11                         | 1326.71 | 49.292  | 148498 | 2 | 663.86  | -1.93  |
| Q7CQ05 GRCA_SALTY Autonomous glycyl radical cofactor | 5  |                 | LGEIEYR                  | 48  | 7  | 10 | 49.06  | b2b3y1y2y3°y3y5y6°y6y7                                 | 879.45  | 42.918  | 141756 | 2 | 440.23  | -12.77 |
| Q7CQ05 GRCA_SALTY Autonomous glycyl radical cofactor | 6  |                 | FNSLTPEQQRDVIIAR         | 106 | 15 | 14 | 76.47  | b2*b2b3°b3b5y1y3y4y6y7y10*y10y13y15                    | 1773.90 | 48.087  | 82310  | 3 | 591.97  | -11.29 |
| Q7CQ05 GRCA_SALTY Autonomous glycyl radical cofactor | 7  |                 | VSGYAVR                  | 99  | 7  | 4  | 36.26  | b4b5y2y4                                               | 751.40  | 27.329  | 22847  | 2 | 376.20  | -13.73 |
| Q7CQ05 GRCA_SALTY Autonomous glycyl radical cofactor | 8  |                 | VEGGQHNLNVNLRR           | 66  | 14 | 7  | 40.41  | b1b5b7b8b9°b9y2                                        | 1590.88 | 47.171  | 13296  | 2 | 795.95  | 0.46   |
| Q7CQ05 GRCA_SALTY Autonomous glycyl radical cofactor | 9  |                 | VEGGQHNLNVNLRLR          | 66  | 13 | 8  | 69.11  | b4b7y3y4*y4y6y7y8                                      | 1434.76 | 50.931  | 125968 | 3 | 478.92  | -15.48 |
| Q7CQ05 GRCA_SALTY Autonomous glycyl radical cofactor | 10 |                 | TFTESL                   | 121 | 6  | 7  | 51.62  | b3°b3b4°b4b5y4°y4                                      | 697.34  | 55.874  | 82893  | 1 | 697.34  | -3.15  |

|                                                     |    |                      |                                |     |    |    |        |                                                                               |         |         |         |   |         |        |
|-----------------------------------------------------|----|----------------------|--------------------------------|-----|----|----|--------|-------------------------------------------------------------------------------|---------|---------|---------|---|---------|--------|
| Q7CQ05 GRCA_SALTY Autonomous glycy radical cofactor | 11 |                      | AANDDLLNSFWLLDSEKGEAR          | 9   | 21 | 29 | 265.01 | b3b4b5°b5°b5b6°b6°b6b7°b7y3y4y5y7y8°y8y9°y9y10y11y12y13y14y15y16y17y18y19°y19 | 2364.13 | 92.760  | 495123  | 3 | 788.72  | -5.99  |
| Q7CQ05 GRCA_SALTY Autonomous glycy radical cofactor | 12 | Carbamidomethyl+C(1) | CIVAKSGFAEDEVVAVSK             | 30  | 18 | 4  | 27.97  | b8b11y12y13                                                                   | 1908.96 | 64.679  | 1817    | 2 | 954.98  | -6.91  |
| Q7CQ05 GRCA_SALTY Autonomous glycy radical cofactor | 13 |                      | PMEVKPEVR                      | 57  | 9  | 3  | 30.26  | b3b4b7                                                                        | 1084.58 | 49.317  | 137108  | 2 | 542.79  | -5.63  |
| Q7CQ05 GRCA_SALTY Autonomous glycy radical cofactor | 14 |                      | EGGQHLNVNVLRR                  | 67  | 13 | 3  | 15.12  | b3b11°b11                                                                     | 1491.79 | 47.178  | 18786   | 3 | 497.94  | -14.24 |
| Q7CQ05 GRCA_SALTY Autonomous glycy radical cofactor | 15 |                      | EIPMEVKPEVR                    | 55  | 11 | 0  | 2.67   |                                                                               | 1308.68 | 49.336  | 40296   | 3 | 436.90  | -10.63 |
| Q7CQ05 GRCA_SALTY Autonomous glycy radical cofactor | 16 |                      | MITGIQITK                      | 0   | 9  | 0  | 1.78   |                                                                               | 986.55  | 55.373  | 2715    | 2 | 493.78  | -15.10 |
| Q8ZK80 RL9_SALTY 50S ribosomal protein L9           | 1  |                      | LADVLAANAR                     | 57  | 11 | 17 | 124.59 | b2b3b4b5y1y3°y3y4°y4y5°y5y6°y6y7y8y9y11                                       | 1084.60 | 53.847  | 206214  | 2 | 542.80  | -12.27 |
| Q8ZK80 RL9_SALTY 50S ribosomal protein L9           | 2  |                      | VANLGS LGDQVNVK                | 8   | 14 | 18 | 152.55 | b2b3b4b10b13y3y4y6y7°y7y8y9°y9y10°y10y11y12y14                                | 1413.76 | 56.967  | 193678  | 2 | 707.39  | -3.54  |
| Q8ZK80 RL9_SALTY 50S ribosomal protein L9           | 3  |                      | DIADAVTAAGVDVAK                | 97  | 15 | 13 | 151.75 | b3b4b5b6b9b10y4y6y7y8y9y11y13                                                 | 1415.74 | 66.351  | 118189  | 2 | 708.37  | 1.72   |
| Q8ZK80 RL9_SALTY 50S ribosomal protein L9           | 4  |                      | LFGSIGTRDIADAVTAAGVDVAK        | 89  | 23 | 3  | 8.49   | b17°b17y18                                                                    | 2247.19 | 95.037  | 4185    | 3 | 749.74  | -3.26  |
| Q8ZK80 RL9_SALTY 50S ribosomal protein L9           | 5  |                      | INALETVTIASK                   | 71  | 12 | 3  | 25.26  | b3y10y11                                                                      | 1259.71 | 61.390  | 64635   | 2 | 630.36  | -5.04  |
| Q8ZK80 RL9_SALTY 50S ribosomal protein L9           | 6  |                      | TTGEHEVNFQVHSEVFAK             | 123 | 18 | 6  | 14.83  | b10°b10b13°b13y6°y6                                                           | 2058.97 | 72.068  | 3907    | 4 | 515.50  | -10.32 |
| Q8ZK80 RL9_SALTY 50S ribosomal protein L9           | 7  |                      | AGDEGKLFGSIGTR                 | 83  | 14 | 3  | 23.81  | b9y7y8                                                                        | 1407.70 | 55.469  | 93108   | 3 | 469.91  | -13.70 |
| Q8ZK80 RL9_SALTY 50S ribosomal protein L9           | 8  |                      | IGTRDIADAVTAAGVDVAK            | 93  | 19 | 2  | 21.29  | b4b5                                                                          | 1842.99 | 94.936  | 40397   | 2 | 922.00  | 1.52   |
| P0A1R6 DBHA_SALTY DNA-binding protein HU-alpha      | 1  |                      | IAAANVPAFVSGK                  | 70  | 13 | 24 | 175.69 | b2b3b4b5°b5b6°b6y1y2y3°y3y4y5y6y7°y7y8y9y10y11°y11y12°y12y13                  | 1244.69 | 59.797  | 1106778 | 2 | 622.85  | -6.87  |
| P0A1R6 DBHA_SALTY DNA-binding protein HU-alpha      | 2  |                      | AALESTLAAITESLKEGDAVQLVG FGTFK | 22  | 29 | 15 | 92.76  | b2b3b4°b4b5b7b9b10b13y3y4y6°y6y7y8                                            | 2966.57 | 115.951 | 338055  | 3 | 989.53  | -1.98  |
| P00499 HIS1_SALTY ATP phohoribosyltransferase       | 1  |                      | LIAMAENMPIDILR                 | 38  | 14 | 15 | 136.75 | b3b8b11b12y2y3y4y6y8y9y10y11y12°y12y14                                        | 1599.86 | 90.645  | 105090  | 2 | 800.43  | 1.07   |
| P00499 HIS1_SALTY ATP phohoribosyltransferase       | 2  |                      | LSLATPVDEAWDGPAALDGKR          | 105 | 21 | 10 | 51.67  | b14y2y3y4°y4y10y11y13y16y21                                                   | 2182.10 | 76.219  | 101479  | 3 | 728.04  | -5.26  |
| P00499 HIS1_SALTY ATP phohoribosyltransferase       | 3  | Carbamidomethyl+C(8) | AGLADAICDLVSTGATLEANGLRE VEVYR | 160 | 30 | 25 | 167.53 | b3b4b5°b5b6°b6b7°b7b9b10°b10b11y3y5y12°y12y13y14y15y17y19y23y26y30°y30        | 3176.63 | 136.526 | 84662   | 3 | 1059.55 | 1.54   |
| P00499 HIS1_SALTY ATP phohoribosyltransferase       | 4  |                      | ALGASSILVLPIEK                 | 282 | 14 | 14 | 109.4  | b2b3b5°b5b7°b7b9y4y5y6y7y8y12y14                                              | 1410.86 | 84.495  | 71099   | 2 | 705.93  | 0.43   |
| P00499 HIS1_SALTY ATP phohoribosyltransferase       | 5  |                      | IQGVIQAR                       | 216 | 8  | 5  | 31.94  | b2b3°b3b4y6                                                                   | 884.52  | 45.743  | 52678   | 2 | 442.77  | -9.66  |
| P00499 HIS1_SALTY ATP phohoribosyltransferase       | 6  |                      | YIMMHAPSER                     | 227 | 10 | 4  | 27.6   | b3y5y6y10                                                                     | 1234.58 | 65.547  | 34307   | 2 | 617.79  | 9.39   |
| P00499 HIS1_SALTY ATP phohoribosyltransferase       | 7  |                      | LEEVIALLPGAERPTILPLAGEQQR      | 237 | 25 | 11 | 39.78  | b1b2°b2b3b4°b4y5y6y17y19y25                                                   | 2713.50 | 90.048  | 30895   | 3 | 905.17  | -7.29  |
| P00499 HIS1_SALTY ATP phohoribosyltransferase       | 8  |                      | LSLATPVDEAWDGPAALDGK           | 105 | 20 | 4  | 20.49  | b2y8y11y14                                                                    | 2026.02 | 85.480  | 4735    | 3 | 676.01  | 4.22   |

|                                                          |    |                                             |                                      |     |    |    |        |                                                                                                                                        |         |         |        |   |         |        |
|----------------------------------------------------------|----|---------------------------------------------|--------------------------------------|-----|----|----|--------|----------------------------------------------------------------------------------------------------------------------------------------|---------|---------|--------|---|---------|--------|
| P00499 HIS1_SALTY ATP phohoribosyltransferase            | 9  |                                             | ELLAR                                | 22  | 5  | 2  | 25.59  | b3b4                                                                                                                                   | 601.36  | 29.024  | 87945  | 1 | 601.36  | -8.93  |
| P00499 HIS1_SALTY ATP phohoribosyltransferase            | 10 |                                             | VAMHMOVSETLFWETMEK                   | 262 | 18 | 5  | 36.79  | b4b6b10y7y8                                                                                                                            | 2156.03 | 75.304  | 87159  | 3 | 719.35  | 22.31  |
| P00499 HIS1_SALTY ATP phohoribosyltransferase            | 11 | Carbamidomethyl+C(2)                        | SCLLNGSVEVAPR                        | 147 | 13 | 4  | 19.69  | b10°b10y4y10                                                                                                                           | 1401.70 | 37.381  | 5773   | 2 | 701.35  | -11.58 |
| P00499 HIS1_SALTY ATP phohoribosyltransferase            | 12 | Carbamidomethyl+C(2)                        | ACLIQR                               | 192 | 6  | 1  | 13.24  | b3                                                                                                                                     | 760.41  | 30.250  | 4862   | 1 | 760.41  | -0.96  |
| P00499 HIS1_SALTY ATP phohoribosyltransferase            | 13 |                                             | AQGEDPR                              | 85  | 7  | 4  | 36.26  | b3b4y5°y5                                                                                                                              | 772.37  | 64.703  | 3332   | 1 | 772.37  | 12.01  |
| P00499 HIS1_SALTY ATP phohoribosyltransferase            | 14 | Carbamidomethyl+C(6)                        | LDFGGCRLSLATPVDEAWDGPAALDGK          | 98  | 27 | 7  | 34.96  | b7b10b11°b11y10y12y13                                                                                                                  | 2831.38 | 76.272  | 41480  | 3 | 944.47  | 4.83   |
| P00499 HIS1_SALTY ATP phohoribosyltransferase            | 15 |                                             | ESKYIMMHAPSER                        | 224 | 13 | 7  | 39.54  | b5b11y5°y5y9y10°y10                                                                                                                    | 1578.75 | 90.115  | 5100   | 3 | 526.92  | 3.71   |
| P00499 HIS1_SALTY ATP phohoribosyltransferase            | 16 | Carbamidomethyl+C(2); Carbamidomethyl+C(21) | SCLLNGSVEVAPRAGLADAICDLVSTGATLEANGLR | 147 | 36 | 3  | 10.87  | b12b14y6                                                                                                                               | 3670.89 | 137.668 | 2706   | 3 | 1224.30 | 11.31  |
| P00499 HIS1_SALTY ATP phohoribosyltransferase            | 17 | Carbamidomethyl+C(2); Oxidation+M(10)       | ACLIQRDGEMAQSK                       | 192 | 14 | 3  | 26.15  | b3b12b13                                                                                                                               | 1622.76 | 136.662 | 10690  | 1 | 1622.76 | -3.61  |
| P00499 HIS1_SALTY ATP phohoribosyltransferase            | 18 |                                             | PLAGEQQR                             | 254 | 8  | 0  | 8.9    |                                                                                                                                        | 898.46  | 90.006  | 8547   | 1 | 898.46  | -13.25 |
| P0A1P0 G3P1_SALTY Glyceraldehyde-3-phohate dehydrogenase | 1  |                                             | VINDNFGIIEGLMTTVHATTATQK             | 160 | 24 | 47 | 316.55 | b2b3°b3b4°b4°b4b5°b5b6°b6b7°b7°b7y1y3y4y5y6y7°y7°y7y8°y8°y8y9°y9y10°y10y11y12°y12y13y14y15°y15°y15y16°y16y17y18y19y20y21y22°y22y24°y24 | 2574.32 | 98.194  | 937740 | 3 | 858.78  | -0.09  |
| P0A1P0 G3P1_SALTY Glyceraldehyde-3-phohate dehydrogenase | 2  |                                             | AGIALNDNFVK                          | 296 | 11 | 18 | 107.03 | b3b4b10°b10y1y2y3y4°y4y5°y5y6°y6y7°y7y8y11°y11                                                                                         | 1161.62 | 61.719  | 444969 | 2 | 581.31  | -9.14  |
| P0A1P0 G3P1_SALTY Glyceraldehyde-3-phohate dehydrogenase | 3  |                                             | LVSWYDNETGYSNK                       | 307 | 14 | 12 | 96.9   | b9b11y2y3°y3y5y6y9y10y11y12y14                                                                                                         | 1675.77 | 58.719  | 238883 | 2 | 838.39  | 3.06   |
| P0A1P0 G3P1_SALTY Glyceraldehyde-3-phohate dehydrogenase | 4  |                                             | AATYEQIK                             | 249 | 8  | 12 | 62.3   | b6b7°b7b8y2y4°y4y5y6°y6y8°y8                                                                                                           | 923.47  | 31.627  | 179980 | 2 | 462.24  | -11.10 |
| P0A1P0 G3P1_SALTY Glyceraldehyde-3-phohate dehydrogenase | 5  |                                             | SDIEIVAINDLLDAEYMAYMLK               | 24  | 22 | 19 | 129.1  | b2b3b4°b4b5b6b7°b7b8y1y2y3y4y5y6y7y12°y12y22                                                                                           | 2530.24 | 127.092 | 164833 | 3 | 844.08  | -2.99  |
| P0A1P0 G3P1_SALTY Glyceraldehyde-3-phohate dehydrogenase | 6  |                                             | GASQNIIPSSTGAAK                      | 198 | 15 | 12 | 99.26  | b6b7°b7y2y4y5y7y8y9y10y11y15                                                                                                           | 1401.73 | 41.375  | 128082 | 2 | 701.37  | -3.22  |
| P0A1P0 G3P1_SALTY Glyceraldehyde-3-phohate dehydrogenase | 7  |                                             | VPTPNVSVVDLTVR                       | 232 | 14 | 12 | 114.47 | b3b5y2y4y5y6y7y8y9y11y12y14                                                                                                            | 1495.85 | 71.024  | 113214 | 2 | 748.43  | 1.06   |
| P0A1P0 G3P1_SALTY Glyceraldehyde-3-phohate dehydrogenase | 8  |                                             | VVLTGPSKDNTPMFVK                     | 116 | 16 | 7  | 36.2   | b2b3y5y7y13y14y16                                                                                                                      | 1732.91 | 58.024  | 90076  | 3 | 578.31  | -14.51 |
| P0A1P0 G3P1_SALTY Glyceraldehyde-3-phohate dehydrogenase | 9  |                                             | VLPELNGK                             | 217 | 8  | 7  | 39.72  | b2y3°y3y4°y4y6y8                                                                                                                       | 869.50  | 45.365  | 65174  | 2 | 435.25  | -12.21 |
| P0A1P0 G3P1_SALTY Glyceraldehyde-3-phohate dehydrogenase | 10 |                                             | TVDGPSHKDWR                          | 184 | 11 | 6  | 50.62  | b3b7b9y4y9°y9                                                                                                                          | 1297.61 | 30.209  | 31590  | 3 | 433.21  | -14.77 |

|                                                          |    |                                                      |                                  |     |    |    |        |                                                                                                                        |         |         |        |   |         |        |
|----------------------------------------------------------|----|------------------------------------------------------|----------------------------------|-----|----|----|--------|------------------------------------------------------------------------------------------------------------------------|---------|---------|--------|---|---------|--------|
| P0A1P0 G3P1_SALTY Glyceraldehyde-3-phohate dehydrogenase | 11 |                                                      | IVFR                             | 15  | 4  | 1  | 12.35  | y3                                                                                                                     | 534.34  | 38.299  | 11453  | 1 | 534.34  | -8.00  |
| P0A1P0 G3P1_SALTY Glyceraldehyde-3-phohate dehydrogenase | 12 |                                                      | LTGMAFR                          | 225 | 7  | 8  | 77.66  | b3b5b6°b6y4y5y6°y6                                                                                                     | 795.40  | 101.639 | 5150   | 1 | 795.40  | -18.95 |
| P0A1P0 G3P1_SALTY Glyceraldehyde-3-phohate dehydrogenase | 13 | Carbamidomethyl+C(20)                                | GVLGYTEDDVVSTDFNGEVCTSV<br>FDAK  | 269 | 27 | 3  | 22.37  | b8b12b13                                                                                                               | 2924.35 | 94.752  | 4220   | 4 | 731.84  | 11.60  |
| P0A1P0 G3P1_SALTY Glyceraldehyde-3-phohate dehydrogenase | 14 | Carbamidomethyl+C(18)<br>;Carbamidomethyl+C(22)<br>) | GANFDKYEGQDIVSNASCTTNCL<br>APLAK | 132 | 28 | 39 | 306.27 | b3b4b5°b5b8°b8b10°b10b11°b11°b11b12°b12b13°b13b15b16b17b23b24°b24b26b27y3y4y5y6y8y9y10y11y12°y12y13°y13y14y15°y15y16   | 3044.41 | 66.948  | 400967 | 3 | 1015.47 | -0.56  |
| P0A1P0 G3P1_SALTY Glyceraldehyde-3-phohate dehydrogenase | 15 |                                                      | LTGMAFRVPTPNVSVVDLTVR            | 225 | 21 | 3  | 19.89  | b4b7b16                                                                                                                | 2272.22 | 86.678  | 43621  | 3 | 758.08  | -10.85 |
| P0A1P0 G3P1_SALTY Glyceraldehyde-3-phohate dehydrogenase | 16 |                                                      | GGRGASQNIIPSSTGAAK               | 195 | 18 | 6  | 48.62  | b6b7b8b9y8°y8                                                                                                          | 1671.89 | 37.370  | 17428  | 2 | 836.45  | 5.62   |
| P0A1P0 G3P1_SALTY Glyceraldehyde-3-phohate dehydrogenase | 17 |                                                      | TVDGPSHKDWR                      | 184 | 11 | 3  | 23.27  | b9y4y9                                                                                                                 | 1297.62 | 71.852  | 12344  | 2 | 649.32  | -2.82  |
| P0A1P0 G3P1_SALTY Glyceraldehyde-3-phohate dehydrogenase | 18 |                                                      | DGPSHKDWR                        | 186 | 9  | 0  | 2.67   |                                                                                                                        | 1097.52 | 30.244  | 9439   | 2 | 549.26  | 9.01   |
| P0A1P0 G3P1_SALTY Glyceraldehyde-3-phohate dehydrogenase | 19 |                                                      | LTGPSKDNTPMFVK                   | 118 | 14 | 2  | 7.27   | b9°b9                                                                                                                  | 1534.78 | 58.031  | 7233   | 2 | 767.89  | -9.62  |
| P0A1P0 G3P1_SALTY Glyceraldehyde-3-phohate dehydrogenase | 20 |                                                      | AATYEQIK                         | 249 | 8  | 0  | 1.33   |                                                                                                                        | 905.46  | 31.619  | 65740  | 2 | 453.23  | -8.43  |
| P0A1P0 G3P1_SALTY Glyceraldehyde-3-phohate dehydrogenase | 21 |                                                      | VVLTGPSKDNTPMFVK                 | 116 | 16 | 0  | 4.89   |                                                                                                                        | 1715.89 | 57.966  | 3488   | 3 | 572.63  | -6.54  |
| P0AA28 THIO_SALTY Thioredoxin-1                          | 1  |                                                      | LNIDQNPGTAPK                     | 58  | 12 | 29 | 158.65 | b2°b2b4°b4°b4b6°b6°b6b7b10y1y2y3y4y5y6°y6y7y8°y8°y8y9°y9y10°y10°y10y11°y11y12                                          | 1267.66 | 39.119  | 204468 | 2 | 634.34  | -0.96  |
| P0AA28 THIO_SALTY Thioredoxin-1                          | 2  |                                                      | MIAPILDEIADEYQGK                 | 37  | 16 | 21 | 165.44 | b2b3b12b13y2y3°y3y4y5y6°y6y7y8°y8y10y11°y11y12y13y14y16                                                                | 1805.90 | 93.680  | 158401 | 2 | 903.46  | 2.10   |
| P0AA28 THIO_SALTY Thioredoxin-1                          | 3  |                                                      | GIPTLLLFK                        | 74  | 9  | 9  | 65.75  | b2y1y2y3y4y5y6y7y9                                                                                                     | 1001.63 | 91.037  | 140409 | 2 | 501.32  | -12.49 |
| P0AA28 THIO_SALTY Thioredoxin-1                          | 4  |                                                      | MIAPILDEIADEYQGKLTVAK            | 37  | 21 | 13 | 105.8  | b3b4b11y4y5y7y11y12°y12y13y16y18y19                                                                                    | 2318.22 | 94.870  | 221135 | 3 | 773.41  | -3.90  |
| P0AA28 THIO_SALTY Thioredoxin-1                          | 5  |                                                      | GQLKEFLDANLA                     | 97  | 12 | 4  | 21.29  | b5b10°b10y7                                                                                                            | 1318.69 | 49.337  | 4618   | 2 | 659.85  | -11.11 |
| Q8ZP65 TPX_SALTY Probable thiol peroxidase               | 1  |                                                      | SQTVHFQGNPVTVANVIPQAGSK          | 1   | 23 | 42 | 243.13 | b2°b2b3°b3b4°b4b5b7°b7b8°b8b9°b9°b9b10°b10b11°b11b12°b12b13°b13b14b16°b16b17y1y2°y2y4y6°y6°y6y7y8y9y10y11y12y17°y17y23 | 2379.23 | 64.722  | 220979 | 3 | 793.75  | -4.31  |



|                                                           |    |                       |                                      |     |    |    |        |                                                            |         |         |        |   |         |        |
|-----------------------------------------------------------|----|-----------------------|--------------------------------------|-----|----|----|--------|------------------------------------------------------------|---------|---------|--------|---|---------|--------|
| Q8ZP65 TPX_SALTY Probable thiol peroxidase                | 2  |                       | AQAFTLVAK                            | 24  | 9  | 11 | 76.79  | b2*b2b3b5y1y2y3y4y6y7y9                                    | 948.54  | 53.835  | 118427 | 2 | 474.77  | -13.58 |
| Q8ZP65 TPX_SALTY Probable thiol peroxidase                | 3  | Carbamidomethyl+C(2)  | FCGAEGLSNVITLSTLR                    | 93  | 17 | 10 | 71.13  | b2b3b4b14b15y4y6y13y15y17                                  | 1837.96 | 86.156  | 116083 | 2 | 919.48  | 4.18   |
| Q8ZP65 TPX_SALTY Probable thiol peroxidase                | 4  | Carbamidomethyl+C(13) | VLNIFPSIDTGVCAASVR                   | 48  | 18 | 13 | 77.38  | b3b4b5*b5b15y2y3y10y12y13*y13y14y18                        | 1919.01 | 85.234  | 112877 | 2 | 960.01  | 3.63   |
| Q8ZP65 TPX_SALTY Probable thiol peroxidase                | 5  |                       | DLSDVSLSQYAGK                        | 33  | 13 | 15 | 94.91  | b4b5b6b8y3y5*y5y6*y6y7*y7y11*y11*y11y13                    | 1382.68 | 59.553  | 74612  | 2 | 691.84  | -0.44  |
| Q8ZP65 TPX_SALTY Probable thiol peroxidase                | 6  |                       | NYGVEIVDGPLK                         | 116 | 12 | 6  | 35.84  | b2b3y4y8y10y12                                             | 1303.69 | 65.145  | 44180  | 2 | 652.35  | -2.53  |
| Q8ZP65 TPX_SALTY Probable thiol peroxidase                | 7  |                       | DLSDVSLSQYAGKR                       | 33  | 14 | 9  | 64.32  | b7b12*b12y5y6y7y9*y9y12                                    | 1538.76 | 55.283  | 16229  | 3 | 513.59  | -12.38 |
| Q8ZP65 TPX_SALTY Probable thiol peroxidase                | 8  | Carbamidomethyl+C(15) | FNQLATEVENTVVL CVSADLPFAQSR          | 67  | 26 | 8  | 25.19  | b9*b9b13y10y13*y13y14*y14                                  | 2908.43 | 104.939 | 3124   | 4 | 727.86  | -5.79  |
| Q8ZP65 TPX_SALTY Probable thiol peroxidase                | 9  |                       | AVIVLDENDNVIFS QLVDEITHEPDYDAALNVLKA | 133 | 35 | 21 | 137.12 | b3b4b5b10*b10b11*b11b14y3y4y5*y5y6y12y13y18y22y24y29y30y31 | 3882.96 | 120.707 | 153490 | 3 | 1294.99 | -0.57  |
| Q8ZP65 TPX_SALTY Probable thiol peroxidase                | 10 | Carbamidomethyl+C(16) | KFNQLATEVENTVVL CVSADLPFAQSR         | 66  | 27 | 11 | 51.27  | b4b8*b8y5y8*y8y9*y9*y9y10y11                               | 3036.59 | 136.264 | 41203  | 4 | 759.90  | 12.94  |
| Q8ZP65 TPX_SALTY Probable thiol peroxidase                | 11 |                       | DLSDVSLSQYAGKR                       | 33  | 14 | 3  | 18.37  | b4b9y4                                                     | 1538.77 | 47.282  | 9594   | 2 | 769.89  | -3.97  |
| Q8ZP65 TPX_SALTY Probable thiol peroxidase                | 12 | Phosphoryl STY(13)    | MSQTVHFQGNPVTVANVIPQAGSK             | 0   | 24 | 9  | 41.41  | b11b12_H3PO4b12b15y5*y5y12*y12y16y17                       | 2590.21 | 86.618  | 55472  | 3 | 864.08  | -9.71  |
| P0A251 AHPC_SALTY Alkyl hydroperoxide reductase subunit C | 1  |                       | YAMIGDPTGALTR                        | 93  | 13 | 9  | 78.65  | b2b3b4y7y8y9y10y11y13                                      | 1365.68 | 63.351  | 97181  | 2 | 683.35  | -0.18  |
| P0A251 AHPC_SALTY Alkyl hydroperoxide reductase subunit C | 2  | Carbamidomethyl+C(13) | AAQYVAAHGPEVCPAK                     | 153 | 16 | 17 | 138.97 | b3b4b8b10*b10b13y2y3y4y6y7y8y9*y9y11y12y16                 | 1668.79 | 35.971  | 83839  | 3 | 556.94  | -13.68 |
| P0A251 AHPC_SALTY Alkyl hydroperoxide reductase subunit C | 3  |                       | ATFVVDPPQGIQAEIVTAEGIGR              | 120 | 23 | 18 | 100.23 | b2b3*b3b5*b5b7b9y2y3y4y5*y5y7y8y9*y9y10y12                 | 2384.28 | 129.220 | 52539  | 3 | 795.43  | -2.25  |
| P0A251 AHPC_SALTY Alkyl hydroperoxide reductase subunit C | 4  |                       | NFDNMREDEGLADR                       | 106 | 14 | 4  | 43.42  | y4y5y7y8                                                   | 1681.71 | 48.633  | 42962  | 3 | 561.24  | -7.84  |
| P0A251 AHPC_SALTY Alkyl hydroperoxide reductase subunit C | 5  |                       | LGVDVYSVSTDTHTFHK                    | 63  | 17 | 7  | 40.69  | b2b3b8y7y9y10y12                                           | 1905.92 | 58.397  | 9966   | 3 | 635.98  | -7.94  |
| P0A251 AHPC_SALTY Alkyl hydroperoxide reductase subunit C | 6  | Carbamidomethyl+C(15) | WSVFFFPADFTFVCPTELGDVA DHYEELQK      | 32  | 31 | 3  | 11.03  | b11y7y13                                                   | 3757.76 | 95.824  | 7972   | 5 | 752.36  | 11.30  |
| P0A251 AHPC_SALTY Alkyl hydroperoxide reductase subunit C | 7  |                       | EGEATLAPSLDLVGK                      | 171 | 15 | 3  | 25.35  | b4b6b13                                                    | 1499.77 | 48.423  | 5288   | 2 | 750.39  | -16.69 |
| P0A251 AHPC_SALTY Alkyl hydroperoxide reductase subunit C | 8  |                       | NGEFIEVTEK                           | 17  | 10 | 3  | 27.6   | b8b9y9                                                     | 1165.59 | 33.609  | 3865   | 2 | 583.30  | 10.79  |
| P0A251 AHPC_SALTY Alkyl hydroperoxide reductase subunit C | 9  | Carbamidomethyl+C(10) | YVAAHPGEVCPAK                        | 156 | 13 | 3  | 24.03  | b3b5b12                                                    | 1398.69 | 36.009  | 2866   | 2 | 699.85  | 4.97   |
| P0A251 AHPC_SALTY Alkyl hydroperoxide reductase subunit C | 10 | Carbamidomethyl+C(11) | QYVAAHPGEVCPAK                       | 155 | 14 | 3  | 13.95  | b9b11*b11                                                  | 1526.75 | 35.997  | 1587   | 2 | 763.88  | 7.92   |
| P65702 PGK_SALTY Phohoglycerate kinase                    | 1  |                       | VLPAVAMLEER                          | 373 | 11 | 12 | 84.45  | b2b3y1y2*y2y3y5y6y7y8y9y11                                 | 1227.67 | 80.170  | 229359 | 2 | 614.34  | -6.16  |
| P65702 PGK_SALTY Phohoglycerate kinase                    | 2  | Carbamidomethyl+C(6)  | FADVACAGPLLAELDALGK                  | 156 | 20 | 20 | 161.14 | b2b3b4b5b7b8b9b12y1y2y3y4y5y6y8y9y12y13y15y20              | 2002.04 | 99.276  | 198660 | 2 | 1001.52 | 5.12   |
| P65702 PGK_SALTY Phohoglycerate kinase                    | 3  |                       | SVNDVKEDEQILDIGDASAQQLAE ILK         | 272 | 27 | 11 | 51.27  | b1b11b15y1y2y3y4y12y13y14y27                               | 2941.50 | 100.977 | 164038 | 3 | 981.17  | -0.42  |
| P65702 PGK_SALTY Phohoglycerate kinase                    | 4  | Carbamidomethyl+C(5)  | LLTTCIDIPVPTDVR                      | 244 | 14 | 20 | 155.56 | b2b5*b5b6*b6b7*b7b9b12y1y2y3y5y7y8y9y10y11y12y14           | 1599.84 | 68.697  | 151118 | 2 | 800.42  | 0.15   |

|                                        |    |                      |                                |     |    |    |       |                                                   |         |         |        |   |         |        |
|----------------------------------------|----|----------------------|--------------------------------|-----|----|----|-------|---------------------------------------------------|---------|---------|--------|---|---------|--------|
| P65702 PGK_SALTY Phohoglycerate kinase | 5  |                      | VATEFSETAPATLK                 | 258 | 14 | 19 | 125.5 | b1b2b3°b3b4°b4b9y5°y5y6y7y9°y9y10y11°y11y12y13y14 | 1464.76 | 53.052  | 125274 | 2 | 732.88  | 0.08   |
| P65702 PGK_SALTY Phohoglycerate kinase | 6  |                      | VMVTSHLGRPTEGEYNEEFSLLPV VNYLK | 53  | 29 | 8  | 21.41 | b1b2b12b13b22y1y2y7                               | 3321.65 | 92.915  | 105862 | 4 | 831.17  | -10.14 |
| P65702 PGK_SALTY Phohoglycerate kinase | 7  |                      | ADLNVPVKEGK                    | 19  | 11 | 8  | 50.62 | b5b9y2y4°y4y6y8y11                                | 1169.65 | 37.541  | 104138 | 2 | 585.33  | -3.24  |
| P65702 PGK_SALTY Phohoglycerate kinase | 8  |                      | TILWNGPVGVFEPNFR               | 302 | 17 | 15 | 99.7  | b2b13y4*y4y5y6°y6*y6y7y11y12°y12y13y14y17         | 1993.04 | 106.792 | 100968 | 2 | 997.02  | 4.10   |
| P65702 PGK_SALTY Phohoglycerate kinase | 9  |                      | IADQLIVGGGIANTFVAAQGHSVG K     | 206 | 25 | 4  | 11.94 | b2b3b5y19                                         | 2423.29 | 78.188  | 49279  | 3 | 808.43  | -5.74  |
| P65702 PGK_SALTY Phohoglycerate kinase | 10 |                      | MTDLDLAGKR                     | 5   | 10 | 6  | 59.21 | b4y4y5y7y9y10                                     | 1119.57 | 43.594  | 41239  | 2 | 560.29  | -7.85  |
| P65702 PGK_SALTY Phohoglycerate kinase | 11 |                      | AQASTHGIGK                     | 146 | 10 | 12 | 84    | b2*b2b3b7y1y2y3y4y5y7y8y10                        | 969.50  | 16.299  | 25704  | 2 | 485.25  | -9.82  |
| P65702 PGK_SALTY Phohoglycerate kinase | 12 | Carbamidomethyl+C(5) | YAALCDVFVMDAFGTAHR             | 128 | 18 | 6  | 20.57 | b2b9b13°b13y9y11                                  | 2043.94 | 90.216  | 16205  | 3 | 681.99  | 0.66   |
| P65702 PGK_SALTY Phohoglycerate kinase | 13 |                      | SLYEADLVDEAKR                  | 231 | 13 | 9  | 28.29 | b2b8b12b13°b13y5y12°y12y13                        | 1508.75 | 81.680  | 10161  | 3 | 503.59  | -4.85  |
| P65702 PGK_SALTY Phohoglycerate kinase | 14 |                      | LVKDYLDGVDVAEGELVVLENV R       | 90  | 23 | 4  | 25.55 | b14b16y4y5                                        | 2544.35 | 98.179  | 3383   | 2 | 1272.68 | -0.38  |
| P65702 PGK_SALTY Phohoglycerate kinase | 15 |                      | ISYISTGGGAFLEFVEGK             | 355 | 18 | 3  | 21.99 | b3b5b10                                           | 1874.93 | 80.615  | 2223   | 2 | 937.97  | -12.57 |
| P65702 PGK_SALTY Phohoglycerate kinase | 16 |                      | LTVLDSLK                       | 197 | 9  | 3  | 37.15 | y4y5y6                                            | 975.56  | 62.306  | 98324  | 2 | 488.28  | -12.39 |
| P65702 PGK_SALTY Phohoglycerate kinase | 17 |                      | DYLDGVDVAEGELVVLENVR           | 93  | 20 | 4  | 13.7  | b6°b6y5y12                                        | 2204.12 | 100.550 | 4096   | 2 | 1102.56 | 4.98   |
| P65702 PGK_SALTY Phohoglycerate kinase | 18 |                      | SLYEADLVDEAK                   | 231 | 12 | 4  | 25.26 | b3°b3y3y4                                         | 1352.63 | 60.895  | 2170   | 3 | 451.55  | -18.86 |
| P65702 PGK_SALTY Phohoglycerate kinase | 19 |                      | EGKVTSDAR                      | 27  | 9  | 7  | 59.73 | b3°b3y3°y3y4y5y8                                  | 962.48  | 136.302 | 2192   | 1 | 962.48  | -13.19 |
| P65702 PGK_SALTY Phohoglycerate kinase | 20 | Carbamidomethyl+C(6) | KYAALCDVFVMDAFGTAHR            | 127 | 19 | 3  | 22.01 | b13y8y9                                           | 2172.05 | 78.563  | 1711   | 3 | 724.69  | 6.74   |
| P65702 PGK_SALTY Phohoglycerate kinase | 21 |                      | ISYISTGGGAFLEFV                | 355 | 15 | 1  | 7.44  | y10                                               | 1560.81 | 80.696  | 19572  | 2 | 780.91  | 7.43   |
| P65702 PGK_SALTY Phohoglycerate kinase | 22 |                      | TDLDLAGKR                      | 6   | 9  | 0  | 2.22  |                                                   | 988.54  | 43.565  | 15803  | 2 | 494.77  | -6.73  |
| P65702 PGK_SALTY Phohoglycerate kinase | 23 |                      | DLNVPVKEGK                     | 20  | 10 | 2  | 18.26 | b3b6                                              | 1098.60 | 37.482  | 15329  | 2 | 549.81  | -9.56  |
| P65702 PGK_SALTY Phohoglycerate kinase | 24 |                      | PAVAMLEER                      | 375 | 9  | 2  | 18.26 | b3b5                                              | 1015.51 | 80.202  | 12457  | 2 | 508.26  | -10.76 |
| P65702 PGK_SALTY Phohoglycerate kinase | 25 |                      | LNVPVKEGK                      | 21  | 9  | 0  | 2.67  |                                                   | 983.58  | 37.460  | 11589  | 2 | 492.30  | -4.78  |
| P65702 PGK_SALTY Phohoglycerate kinase | 26 |                      | ISYISTGG                       | 355 | 8  | 0  | 5.78  |                                                   | 797.40  | 80.715  | 7017   | 1 | 797.40  | -9.72  |
| P65702 PGK_SALTY Phohoglycerate kinase | 27 |                      | SLYEADL                        | 231 | 7  | 1  | 7.32  | y4                                                | 810.39  | 81.590  | 2493   | 1 | 810.39  | 6.18   |
| P65702 PGK_SALTY Phohoglycerate kinase | 28 |                      | QASTHGIGK                      | 147 | 9  | 5  | 50.39 | b4b5b6b8*b8                                       | 898.46  | 16.314  | 2260   | 2 | 449.74  | -12.02 |
| Q7CPD8 YIFE_SALTY UPF0438 protein yifE | 1  |                      | AESFTTTNR                      | 1   | 9  | 11 | 72.53 | b2b3b4b7b9y5y6y7°y7*y7y9                          | 1026.48 | 28.251  | 18586  | 2 | 513.75  | -2.02  |
| Q7CPD8 YIFE_SALTY UPF0438 protein yifE | 2  |                      | HGHAFNDLDLKG                   | 37  | 12 | 4  | 25.26 | b1b5b6y6                                          | 1323.66 | 27.320  | 3080   | 2 | 662.33  | 10.61  |
| Q7CPD8 YIFE_SALTY UPF0438 protein yifE | 3  |                      | GEREPVTD AER                   | 65  | 11 | 3  | 26.28 | b3y4y5                                            | 1258.60 | 23.089  | 1982   | 2 | 629.80  | -5.04  |
| Q7CPD8 YIFE_SALTY UPF0438 protein yifE | 4  |                      | EPVTD AER                      | 68  | 8  | 3  | 39.72 | b3b4b7                                            | 916.43  | 65.268  | 4506   | 1 | 916.43  | -8.13  |

|                                                                        |    |  |                                |     |    |    |        |                                            |         |         |        |   |         |        |
|------------------------------------------------------------------------|----|--|--------------------------------|-----|----|----|--------|--------------------------------------------|---------|---------|--------|---|---------|--------|
| Q7CPD8 YIFE_SALTY UPF0438 protein yifE                                 | 5  |  | GFSR                           | 19  | 4  | 1  | 12.35  | y3                                         | 466.25  | 19.349  | 3357   | 1 | 466.25  | 10.21  |
| Q7CPD8 YIFE_SALTY UPF0438 protein yifE                                 | 6  |  | YFDNKHYP                       | 10  | 9  | 4  | 29.37  | b5y4y7°y7                                  | 1239.61 | 35.158  | 7329   | 3 | 413.87  | 13.79  |
| Q7CPD8 YIFE_SALTY UPF0438 protein yifE                                 | 7  |  | HYPRGFSR                       | 15  | 8  | 5  | 46.49  | b5b6y3y4°y4                                | 1019.51 | 35.181  | 2330   | 2 | 510.26  | -2.33  |
| Q7CPD8 YIFE_SALTY UPF0438 protein yifE                                 | 8  |  | GHAFNDLGLK                     | 38  | 11 | 0  | 3.11   |                                            | 1186.60 | 27.236  | 5868   | 3 | 396.21  | 13.89  |
| P0A283 PTGA_SALTY Glucose-ecific phohotransferase enzyme IIA component | 1  |  | STLTPVVISNMDEIKELIK            | 133 | 19 | 14 | 62.64  | b2°b2b4°b4b13°b13y1y3y1l*y1l1y12y13y15y17  | 2130.15 | 93.020  | 402408 | 3 | 710.72  | -10.54 |
| P0A283 PTGA_SALTY Glucose-ecific phohotransferase enzyme IIA component | 2  |  | VGDVPVIEFDLPLEEK               | 115 | 16 | 17 | 155.44 | b2b3b4b5b6b7b8b10°b10b11y4y6y9y10y11y13y16 | 1812.97 | 99.775  | 142685 | 2 | 906.99  | 3.70   |
| P0A283 PTGA_SALTY Glucose-ecific phohotransferase enzyme IIA component | 3  |  | MVAPVDGTIGK                    | 59  | 11 | 9  | 79.44  | b2y2y3y5y6y8y9y10y11                       | 1087.57 | 46.815  | 129217 | 2 | 544.29  | -9.54  |
| P0A283 PTGA_SALTY Glucose-ecific phohotransferase enzyme IIA component | 4  |  | LSGSVTVGETPVIR                 | 152 | 14 | 4  | 23.81  | b4y7y8y14                                  | 1414.79 | 55.818  | 20257  | 2 | 707.90  | -0.52  |
| P0A283 PTGA_SALTY Glucose-ecific phohotransferase enzyme IIA component | 5  |  | IFETNHAFSIESDSGIELFVHFGIDTVELK | 70  | 30 | 5  | 15.84  | b3b6b13°b13y6                              | 3394.74 | 126.244 | 3926   | 3 | 1132.25 | 16.04  |
| P0A283 PTGA_SALTY Glucose-ecific phohotransferase enzyme IIA component | 6  |  | IAEEGQR                        | 106 | 7  | 5  | 36.26  | b4°b4y3y4*y4                               | 802.40  | 71.981  | 2194   | 1 | 802.40  | -0.91  |
| P0A283 PTGA_SALTY Glucose-ecific phohotransferase enzyme IIA component | 7  |  | VKVGDPVIEFDLPLEEK              | 113 | 18 | 4  | 20.57  | b5b11y6y14                                 | 2040.11 | 96.018  | 143577 | 3 | 680.71  | -6.46  |
| P0A283 PTGA_SALTY Glucose-ecific phohotransferase enzyme IIA component | 8  |  | IVGDGIAIKPTGNKMVAPVDGTIGK      | 45  | 25 | 3  | 11.94  | b3b12y15                                   | 2451.33 | 84.829  | 2419   | 3 | 817.78  | -11.95 |
| P0A1E3 CYSK_SALTY Cysteine synthase A                                  | 1  |  | IQGIGAGFIPGNLDLK               | 226 | 16 | 16 | 86.7   | b2*b2b3b4b8y1y2y3y6y7°y7*y7y10y12y14y16    | 1612.91 | 83.462  | 118307 | 2 | 806.96  | 2.88   |
| P0A1E3 CYSK_SALTY Cysteine synthase A                                  | 2  |  | YLSTALFADLFTEKELQQ             | 305 | 18 | 10 | 41.72  | b2b6b16b17y2*y2y7y8y11y18                  | 2117.09 | 102.728 | 114730 | 2 | 1059.05 | 3.46   |
| P0A1E3 CYSK_SALTY Cysteine synthase A                                  | 3  |  | LTLTMPETMSIER                  | 87  | 13 | 12 | 92.69  | b8°b8b9°b9y4y5y6y8y9°y9y10y13              | 1521.76 | 73.942  | 103634 | 2 | 761.39  | -1.28  |
| P0A1E3 CYSK_SALTY Cysteine synthase A                                  | 4  |  | YLLQQFSNPANPEIHEK              | 137 | 18 | 11 | 71.11  | b2b3b4y3y4y7°y7y9y11y12y18                 | 2141.09 | 74.188  | 102108 | 3 | 714.37  | -5.13  |
| P0A1E3 CYSK_SALTY Cysteine synthase A                                  | 5  |  | GVLKPGVELVEPTSGNTGIALAYVAAAR   | 56  | 28 | 6  | 26.07  | b2y1y4y6y7y9                               | 2753.52 | 81.676  | 88394  | 3 | 918.51  | 0.18   |
| P0A1E3 CYSK_SALTY Cysteine synthase A                                  | 6  |  | NIVVILPSSGER                   | 293 | 12 | 10 | 80.12  | b2b3b4y6y7°y7y8y9y10y12                    | 1283.73 | 64.277  | 47257  | 2 | 642.37  | -4.56  |
| P0A1E3 CYSK_SALTY Cysteine synthase A                                  | 7  |  | AEEIVASDPQK                    | 126 | 11 | 13 | 91.22  | b2°b2b3b4°b4b6y2y3y5y6y7y8y11              | 1186.59 | 32.053  | 39810  | 2 | 593.80  | -1.85  |
| P0A1E3 CYSK_SALTY Cysteine synthase A                                  | 8  |  | VVGITNEEAISTAR                 | 246 | 14 | 3  | 18.37  | b7b10y4                                    | 1459.78 | 49.942  | 22947  | 2 | 730.40  | 6.44   |
| P0A1E3 CYSK_SALTY Cysteine synthase A                                  | 9  |  | YLSTALFADLFTEK                 | 305 | 14 | 3  | 18.37  | b13y6y12                                   | 1618.84 | 103.745 | 11798  | 2 | 809.92  | 2.94   |
| P0A1E3 CYSK_SALTY Cysteine synthase A                                  | 10 |  | IYEDNSLTIGHTPLVR               | 3   | 16 | 3  | 16.33  | b12y4y7                                    | 1827.94 | 61.974  | 42541  | 3 | 609.98  | -13.36 |
| P0A1E3 CYSK_SALTY Cysteine synthase A                                  | 11 |  | VESR                           | 31  | 4  | 2  | 12.35  | y3°y3                                      | 490.26  | 27.249  | 14028  | 1 | 490.26  | -4.30  |
| P0A1E3 CYSK_SALTY Cysteine synthase A                                  | 12 |  | IGNGR                          | 22  | 5  | 2  | 25.59  | y3y4                                       | 516.29  | 34.334  | 6842   | 1 | 516.29  | -4.97  |
| P0A1E3 CYSK_SALTY Cysteine synthase A                                  | 13 |  | AEEIVASDPQKYLLQQFSNPANPEIHEK   | 126 | 29 | 12 | 99.71  | b3b6b11b12b13b14y3y4y6y7y9y10              | 3308.65 | 77.212  | 62524  | 4 | 827.92  | -8.56  |

|                                                |    |                                             |                                   |     |    |    |        |                                                        |         |         |        |   |         |        |
|------------------------------------------------|----|---------------------------------------------|-----------------------------------|-----|----|----|--------|--------------------------------------------------------|---------|---------|--------|---|---------|--------|
| [P0A1E3]CYSK_SALTY Cysteine synthase A         | 14 |                                             | GYKLTLTMPETMSIER                  | 84  | 16 | 3  | 22.86  | b12b13y10                                              | 1869.93 | 77.389  | 41988  | 2 | 935.47  | -10.58 |
| [P0A1E3]CYSK_SALTY Cysteine synthase A         | 15 |                                             | LQEDSFNTKNIVILPSSGER              | 283 | 22 | 5  | 36.27  | b3b4y5y6y9                                             | 2475.28 | 69.598  | 23790  | 3 | 825.77  | 3.55   |
| [P0A1E3]CYSK_SALTY Cysteine synthase A         | 16 |                                             | GKTDLITVAVEPTDSPVIAQALAGEEIKPGPHK | 193 | 33 | 4  | 35.01  | b5y3y4y5                                               | 3381.83 | 79.931  | 10742  | 3 | 1127.95 | 0.58   |
| [P0A1E3]CYSK_SALTY Cysteine synthase A         | 17 | Carbamidomethyl+C(8)                        | NPSFSVKCR                         | 35  | 9  | 9  | 57.97  | b4b7*b7b8°b8y5°y5y6°y6                                 | 1094.53 | 136.314 | 1521   | 1 | 1094.53 | -8.36  |
| [P0A1E3]CYSK_SALTY Cysteine synthase A         | 18 | Oxidation+M(5)                              | LTLTMPETMSIERR                    | 87  | 14 | 3  | 18.37  | b10y9y12                                               | 1693.87 | 78.674  | 32344  | 3 | 565.29  | 4.32   |
| [P0A1E3]CYSK_SALTY Cysteine synthase A         | 19 | Oxidation+M(5)                              | IGANMIWDAEK                       | 44  | 11 | 3  | 30.26  | y3y4y10                                                | 1263.60 | 70.005  | 2737   | 2 | 632.30  | -1.16  |
| [P0A1E3]CYSK_SALTY Cysteine synthase A         | 20 |                                             | QFSNPANPEIHEK                     | 142 | 13 | 2  | 13.18  | b3b5                                                   | 1510.71 | 74.099  | 13274  | 3 | 504.24  | -10.02 |
| [O54297]RS4_SALTY 30S ribosomal protein S4     | 1  |                                             | LSDYGVQLR                         | 47  | 9  | 9  | 73.77  | b3°b3b7y2y5y6y7y8y9                                    | 1050.55 | 51.744  | 140517 | 2 | 525.78  | -6.86  |
| [O54297]RS4_SALTY 30S ribosomal protein S4     | 2  |                                             | VVNIASYQVSPNDVVSIR                | 128 | 18 | 20 | 153.69 | b1b3b8b9b14b15b17*b17y3y4y5y8y9y11*y11y12y13y14y18*y18 | 1960.06 | 72.197  | 104980 | 2 | 980.53  | 3.49   |
| [O54297]RS4_SALTY 30S ribosomal protein S4     | 3  |                                             | LDNVVYR                           | 97  | 7  | 5  | 52.07  | y3y4y5y6y7                                             | 878.46  | 38.665  | 79022  | 2 | 439.74  | -10.98 |
| [O54297]RS4_SALTY 30S ribosomal protein S4     | 4  |                                             | VVNIASYQVSPNDVVSIREK              | 128 | 20 | 6  | 50.23  | b1y5y9y10y11y12                                        | 2217.18 | 66.278  | 35341  | 3 | 739.73  | -2.09  |
| [O54297]RS4_SALTY 30S ribosomal protein S4     | 5  |                                             | MGFGATR                           | 104 | 7  | 4  | 39.27  | y3y4y5y7                                               | 739.34  | 36.869  | 24166  | 2 | 370.18  | -14.61 |
| [O54297]RS4_SALTY 30S ribosomal protein S4     | 6  |                                             | GNTGENLLALLEGR                    | 83  | 14 | 6  | 40.65  | b2b3b5b8b9y11                                          | 1456.77 | 94.944  | 12677  | 2 | 728.89  | -4.36  |
| [O54297]RS4_SALTY 30S ribosomal protein S4     | 7  |                                             | AALELAEQR                         | 156 | 9  | 10 | 72.53  | b3y3*y3y4*y4y6°y6*y6y7y8                               | 1000.54 | 43.973  | 11479  | 1 | 1000.54 | -1.59  |
| [O54297]RS4_SALTY 30S ribosomal protein S4     | 8  |                                             | SDLSADINEHLIVELYSK                | 188 | 18 | 3  | 22.24  | b9b10y12                                               | 2046.05 | 80.411  | 3535   | 2 | 1023.53 | 5.19   |
| [O54297]RS4_SALTY 30S ribosomal protein S4     | 9  |                                             | LDNVVYRMGFGATR                    | 97  | 14 | 3  | 23.81  | b11y6y7                                                | 1598.82 | 84.689  | 27667  | 2 | 799.91  | 2.83   |
| [O54297]RS4_SALTY 30S ribosomal protein S4     | 10 | Carbamidomethyl+C(1)                        | CKIEQAPGQHGAR                     | 31  | 13 | 4  | 19.69  | b6b12*b12y9                                            | 1451.73 | 85.392  | 2372   | 2 | 726.37  | 10.59  |
| [O54297]RS4_SALTY 30S ribosomal protein S4     | 11 | Phosphoryl STY(10)                          | VVNIASYQVSPNDVVSIREK              | 128 | 20 | 4  | 29.65  | b8b11_H3PO4 b10b11b13                                  | 2297.14 | 120.882 | 8435   | 3 | 766.38  | -2.02  |
| [O54297]RS4_SALTY 30S ribosomal protein S4     | 12 |                                             | VVNIASYQVSPN                      | 128 | 12 | 1  | 7.71   | y4                                                     | 1290.65 | 66.184  | 2758   | 3 | 430.89  | -14.66 |
| [P0A1P8]GLRX1_SALTY Glutaredoxin-1             | 1  |                                             | TVGKPVETVPQIFVDQK                 | 50  | 17 | 11 | 67     | b8b9y2y5y6°y6y7*y7y8y11y17                             | 1885.02 | 65.246  | 43148  | 3 | 629.01  | -10.62 |
| [P0A1P8]GLRX1_SALTY Glutaredoxin-1             | 2  | Carbamidomethyl+C(11);Carbamidomethyl+C(14) | MFTVIFGRPGCPYCVR                  | 0   | 16 | 7  | 33.09  | b4°b4b7b12°b12y10y14                                   | 1959.93 | 77.706  | 43021  | 3 | 653.98  | -4.73  |
| [P0A1P8]GLRX1_SALTY Glutaredoxin-1             | 3  | Carbamidomethyl+C(11);Carbamidomethyl+C(14) | MFTVIFGRPGCPYCVRAK                | 0   | 18 | 3  | 21.99  | b6b9b13                                                | 2159.09 | 90.163  | 5442   | 3 | 720.37  | 6.78   |
| [P0A1P8]GLRX1_SALTY Glutaredoxin-1             | 4  |                                             | PQIFVDQK                          | 59  | 8  | 0  | 5.34   |                                                        | 974.54  | 65.186  | 17972  | 1 | 974.54  | 6.51   |
| [Q9L4T0]LUXS_SALTY S-ribosylhomocysteine lyase | 1  | Carbamidomethyl+C(2)                        | FCIPNKEVMPEK                      | 39  | 12 | 7  | 50.85  | b2b9y3y4°y4y8y9                                        | 1491.72 | 53.092  | 25900  | 3 | 497.91  | -10.31 |
| [Q9L4T0]LUXS_SALTY S-ribosylhomocysteine lyase | 2  |                                             | TGFYMSLIGTPDEQR                   | 84  | 15 | 9  | 73.46  | b3b12y3*y3y4y5y7y9y10                                  | 1714.83 | 78.727  | 25541  | 2 | 857.92  | 9.40   |
| [Q9L4T0]LUXS_SALTY S-ribosylhomocysteine lyase | 3  | Carbamidomethyl+C(15)                       | VQDQNQIPELNVYQCGTYQMHSLSAQDIAR    | 113 | 31 | 18 | 44.8   | b2*b2b5b7°b7°b7b11b12°b12y1y3y4°y4y7°y7y12y24y31       | 3635.69 | 75.078  | 24461  | 3 | 1212.57 | 0.94   |
| [Q9L4T0]LUXS_SALTY S-ribosylhomocysteine lyase | 4  |                                             | MQAPAVR                           | 13  | 7  | 6  | 39.27  | b2y2y4y5y6y7                                           | 772.40  | 31.165  | 21248  | 2 | 386.71  | -11.93 |

|                                               |    |                                           |                                |     |    |    |        |                                                                      |         |         |        |   |         |        |
|-----------------------------------------------|----|-------------------------------------------|--------------------------------|-----|----|----|--------|----------------------------------------------------------------------|---------|---------|--------|---|---------|--------|
| Q9L4T0 LUXS_SALTY S-ribosylhomocysteine lyase | 5  |                                           | PLLDsFAVDHTR                   | 1   | 12 | 7  | 81.21  | b10y3y4y6y9y10y11                                                    | 1370.69 | 62.839  | 72494  | 3 | 457.57  | -15.32 |
| Q9L4T0 LUXS_SALTY S-ribosylhomocysteine lyase | 6  |                                           | TMNTPHGDAITVFDLR               | 23  | 16 | 5  | 36.2   | b13y4y6y11y12                                                        | 1787.86 | 71.702  | 51871  | 3 | 596.62  | -9.90  |
| Q9L4T0 LUXS_SALTY S-ribosylhomocysteine lyase | 7  | Carbamidomethyl+C(18)                     | DHLNGNGVEIIDISPMGCR            | 65  | 19 | 6  | 24.74  | b9°b9*b9y5y10y11                                                     | 2097.01 | 66.687  | 16463  | 3 | 699.68  | 13.04  |
| Q9L4T0 LUXS_SALTY S-ribosylhomocysteine lyase | 8  |                                           | LQELHI                         | 165 | 6  | 1  | 13.24  | b4                                                                   | 752.42  | 57.983  | 13984  | 2 | 376.71  | -14.11 |
| Q9L4T0 LUXS_SALTY S-ribosylhomocysteine lyase | 9  |                                           | GIHTLEHLFAGFMR                 | 51  | 14 | 5  | 31.68  | b7b8°b8y3y10                                                         | 1628.86 | 76.299  | 5293   | 2 | 814.93  | 14.16  |
| Q9L4T0 LUXS_SALTY S-ribosylhomocysteine lyase | 10 |                                           | MPLLDsFAVDHTR                  | 0   | 13 | 6  | 41.3   | b5b9y3y7°y7y11                                                       | 1501.75 | 47.133  | 2365   | 2 | 751.38  | 0.89   |
| Q9L4T0 LUXS_SALTY S-ribosylhomocysteine lyase | 11 |                                           | DVRVNSNK                       | 149 | 8  | 5  | 31.94  | b6°b6b7°b7y4                                                         | 931.49  | 47.129  | 2562   | 2 | 466.25  | -7.01  |
| Q9L4T0 LUXS_SALTY S-ribosylhomocysteine lyase | 12 |                                           | VAKTMNTPHGDAITVFDLR            | 20  | 19 | 5  | 19.56  | b7°b7b11y10y12                                                       | 2086.07 | 56.147  | 2147   | 3 | 696.03  | -3.51  |
| Q9L4T0 LUXS_SALTY S-ribosylhomocysteine lyase | 13 |                                           | TGFYMSLIGTPDEQRVADAWK          | 84  | 21 | 3  | 13.25  | b3b11y6                                                              | 2385.17 | 109.293 | 1776   | 3 | 795.73  | 6.24   |
| Q9L4T0 LUXS_SALTY S-ribosylhomocysteine lyase | 14 | Oxidation+M(1)                            | MPLLDsFAVDHTR                  | 0   | 13 | 4  | 32.7   | b5b7b12y5                                                            | 1517.76 | 73.548  | 58905  | 2 | 759.38  | 13.67  |
| Q9L4T0 LUXS_SALTY S-ribosylhomocysteine lyase | 15 | Carbamidomethyl+C(15)<br>;Oxidation+M(20) | VQDQNQIPELNVYQCGTYQMHSLSAQDIAR | 113 | 31 | 4  | 11.03  | b4b7y11°y11                                                          | 3651.67 | 104.636 | 9599   | 3 | 1217.89 | -3.68  |
| P0A1D3 CH60_SALTY 60 kDa chaperonin           | 1  |                                           | GYLSPYFINKPETGAVELESPFILLADKK  | 197 | 29 | 9  | 36.05  | b2b3b4y2y4y6y13y26y29                                                | 3239.71 | 96.393  | 258335 | 4 | 810.68  | -5.65  |
| P0A1D3 CH60_SALTY 60 kDa chaperonin           | 2  |                                           | ANDAAGDGTTTATVLAQSIITEGLK      | 80  | 25 | 26 | 155.66 | b2*b2b3*b3b4*b4b5°b5b14b15°b15b17°b17b25y1y3y4°y4y5y6y7y8y9y10y11y25 | 2418.22 | 92.064  | 251484 | 3 | 806.75  | -5.45  |
| P0A1D3 CH60_SALTY 60 kDa chaperonin           | 3  |                                           | EMLPVLEAVAK                    | 231 | 11 | 13 | 84.45  | b2°b2b3°b3y1y2y3y4y5y6y7y8y11                                        | 1199.66 | 80.141  | 196039 | 2 | 600.34  | -6.11  |
| P0A1D3 CH60_SALTY 60 kDa chaperonin           | 4  |                                           | QQIEEATSDYDREK                 | 350 | 14 | 15 | 92.05  | b9b14y1y3y4°y4y5y6y7°y7y8°y8y9y14*y14                                | 1711.76 | 34.324  | 104220 | 3 | 571.26  | -10.27 |
| P0A1D3 CH60_SALTY 60 kDa chaperonin           | 5  | Carbamidomethyl+C(6)                      | QIVLNCGEEPSVVANTVK             | 452 | 18 | 20 | 162.89 | b3*b3b6b7b12°b12b13y3y5*y5y6°y6y9y11y12y13y14y15y16y18               | 1957.01 | 61.887  | 103111 | 2 | 979.01  | 1.37   |
| P0A1D3 CH60_SALTY 60 kDa chaperonin           | 6  |                                           | GVNVLADAVK                     | 18  | 10 | 8  | 78.99  | b2y3y4y5y6y7y8y10                                                    | 985.56  | 56.668  | 99250  | 2 | 493.28  | -10.22 |
| P0A1D3 CH60_SALTY 60 kDa chaperonin           | 7  |                                           | AVAAAVEELK                     | 122 | 10 | 8  | 59.21  | b2b3y2y3y5y6y8y10                                                    | 1000.56 | 48.045  | 91768  | 2 | 500.78  | -7.81  |
| P0A1D3 CH60_SALTY 60 kDa chaperonin           | 8  |                                           | VEDALHATR                      | 395 | 9  | 11 | 73.77  | b2b3b8y1y2°y2y3y4y5y7y9                                              | 1011.52 | 27.198  | 75131  | 2 | 506.26  | -5.01  |
| P0A1D3 CH60_SALTY 60 kDa chaperonin           | 9  | Carbamidomethyl+C(6)                      | ALSVPCSDSK                     | 132 | 10 | 9  | 56.2   | b2b3°b3y2y4y6y7y8y10                                                 | 1063.50 | 35.948  | 68301  | 2 | 532.26  | -3.90  |
| P0A1D3 CH60_SALTY 60 kDa chaperonin           | 10 |                                           | SFGAPTITK                      | 42  | 9  | 7  | 29.37  | b2b3°b3y1y2y5y7                                                      | 921.49  | 45.624  | 66165  | 2 | 461.25  | -10.00 |
| P0A1D3 CH60_SALTY 60 kDa chaperonin           | 11 |                                           | AVAAGMNPMDLK                   | 105 | 12 | 6  | 47.84  | b3y5y8y9y10y12                                                       | 1217.60 | 58.910  | 54063  | 2 | 609.30  | -3.21  |
| P0A1D3 CH60_SALTY 60 kDa chaperonin           | 12 |                                           | AIAQVGTISANSDETVGK             | 142 | 18 | 11 | 58.58  | b4b16y2y9y10y12y13*y13y14*y14y18                                     | 1760.91 | 48.904  | 51560  | 2 | 880.96  | 2.91   |
| P0A1D3 CH60_SALTY 60 kDa chaperonin           | 13 |                                           | GGDGNYGYNAAATEEYGNMIDMGILDPTK  | 470 | 28 | 9  | 32.3   | b2y1y2y3y4y10y12y14y28                                               | 2966.29 | 88.335  | 40972  | 3 | 989.43  | 2.80   |
| P0A1D3 CH60_SALTY 60 kDa chaperonin           | 14 |                                           | AGKPLLIIAEDVEGEALATLVVNTMR     | 242 | 26 | 11 | 61.01  | b3b6b7y1y3y4°y4*y4y5y6*y6                                            | 2723.50 | 136.263 | 22682  | 3 | 908.51  | 0.00   |
| P0A1D3 CH60_SALTY 60 kDa chaperonin           | 15 |                                           | GQNEQNVGIK                     | 430 | 11 | 7  | 51.08  | b2b8y2y3y4y5y7                                                       | 1201.59 | 27.474  | 12971  | 2 | 601.30  | 4.06   |
| P0A1D3 CH60_SALTY 60 kDa chaperonin           | 16 |                                           | MAAKDVK                        | 0   | 7  | 4  | 39.27  | b6y4y6y7                                                             | 762.41  | 35.221  | 7858   | 2 | 381.71  | -7.77  |

|                                      |    |                                     |                                       |     |    |    |        |                                           |         |         |        |   |         |        |
|--------------------------------------|----|-------------------------------------|---------------------------------------|-----|----|----|--------|-------------------------------------------|---------|---------|--------|---|---------|--------|
| [P0A1D3]CH60_SALTY 60 kDa chaperonin | 17 |                                     | SFGAPTITKDGVSVAREIELEDK               | 42  | 23 | 4  | 27.83  | b3b7b12b17                                | 2462.24 | 87.587  | 5781   | 3 | 821.42  | -14.38 |
| [P0A1D3]CH60_SALTY 60 kDa chaperonin | 18 | Carbamidomethyl+C(18)               | SALQYAASVAGLMITTECMVTDL PK            | 501 | 25 | 6  | 21.42  | b5b9*b9y5y7y12                            | 2670.31 | 125.826 | 120105 | 3 | 890.78  | -2.93  |
| [P0A1D3]CH60_SALTY 60 kDa chaperonin | 19 |                                     | DTTTHIDGVGEEAAIQGR                    | 327 | 18 | 8  | 59.73  | b3b5b7*b7b9b10b15y9                       | 1845.91 | 99.779  | 79461  | 3 | 615.97  | -6.81  |
| [P0A1D3]CH60_SALTY 60 kDa chaperonin | 20 |                                     | EIELEDK                               | 58  | 7  | 3  | 36.26  | b4b5y5                                    | 875.43  | 59.451  | 8275   | 2 | 438.22  | -1.26  |
| [P0A1D3]CH60_SALTY 60 kDa chaperonin | 21 |                                     | NVVLDK                                | 36  | 6  | 1  | 13.24  | y3                                        | 687.41  | 24.334  | 4602   | 2 | 344.21  | 7.46   |
| [P0A1D3]CH60_SALTY 60 kDa chaperonin | 22 |                                     | EIELEDKFENMGAMVK                      | 58  | 17 | 5  | 24.93  | b12y6y8y10*y10                            | 2010.94 | 73.664  | 186875 | 3 | 670.98  | -7.35  |
| [P0A1D3]CH60_SALTY 60 kDa chaperonin | 23 |                                     | IADLKGQNEQNVGIK                       | 425 | 16 | 14 | 90.5   | b3b10*b10y3y4y8y9*y9y10*y10y11*y11y12*y12 | 1741.89 | 40.800  | 177602 | 3 | 581.30  | -9.18  |
| [P0A1D3]CH60_SALTY 60 kDa chaperonin | 24 | Carbamidomethyl+C(16)               | AVAAAVEELKALSVPSCDSK                  | 122 | 20 | 7  | 69.21  | y3y4y6y8y10y14y18                         | 2045.04 | 72.154  | 74997  | 3 | 682.35  | -7.40  |
| [P0A1D3]CH60_SALTY 60 kDa chaperonin | 25 |                                     | GGDGNYGYNAAATEEYGNMIDMG ILDPTKVTR     | 470 | 31 | 4  | 15.53  | b3y6y13y16                                | 3322.51 | 86.655  | 67225  | 3 | 1108.18 | 3.82   |
| [P0A1D3]CH60_SALTY 60 kDa chaperonin | 26 |                                     | AMLQDIATLTGGTVISEEIGMELE KATLEDLGQAK  | 286 | 35 | 8  | 60.15  | b3b4b5b6*b6b8y20y21                       | 3675.87 | 123.126 | 61364  | 3 | 1225.96 | -0.13  |
| [P0A1D3]CH60_SALTY 60 kDa chaperonin | 27 | Carbamidomethyl+C(13)               | AMEAPLRQIVLNCGEESV VANT VK            | 445 | 25 | 6  | 29.57  | b3b5y5y9y11y14                            | 2725.40 | 74.159  | 44899  | 3 | 909.14  | -1.16  |
| [P0A1D3]CH60_SALTY 60 kDa chaperonin | 28 |                                     | VGKEGVITVEDGTGLQDEL DVVE GMQFDR       | 168 | 29 | 5  | 17.18  | y4y9*y9y12*y12                            | 3135.51 | 73.082  | 25962  | 4 | 784.63  | -0.62  |
| [P0A1D3]CH60_SALTY 60 kDa chaperonin | 29 |                                     | AIAQVGTISANSDET VGKLIAEAM DK          | 142 | 26 | 6  | 29.43  | b4b14y4y6y20y21                           | 2632.34 | 91.890  | 15563  | 3 | 878.12  | -3.62  |
| [P0A1D3]CH60_SALTY 60 kDa chaperonin | 30 |                                     | VVINKDTTTHIDGVGEEAAIQGR               | 322 | 23 | 7  | 69.37  | y3y4y5y6y7y11y14                          | 2399.25 | 67.932  | 10005  | 4 | 600.57  | -13.02 |
| [P0A1D3]CH60_SALTY 60 kDa chaperonin | 31 |                                     | VAQIRQQIEATSDYDR                      | 345 | 17 | 3  | 22.52  | b3b4y13                                   | 2022.00 | 81.472  | 7501   | 2 | 1011.51 | 7.18   |
| [P0A1D3]CH60_SALTY 60 kDa chaperonin | 32 |                                     | ANDAAGDGTTTATVLQSIITEGL KAVAAGMNPMDLK | 80  | 37 | 3  | 37.85  | y7y8y9                                    | 3616.81 | 132.214 | 3788   | 4 | 904.96  | -1.82  |
| [P0A1D3]CH60_SALTY 60 kDa chaperonin | 33 |                                     | DGVSVAREIELEDK                        | 51  | 14 | 3  | 18.37  | b7b11y7                                   | 1559.80 | 36.077  | 1841   | 3 | 520.61  | 7.51   |
| [P0A1D3]CH60_SALTY 60 kDa chaperonin | 34 | Phosphoryl STY(13)                  | SFGAPTITKDGVSVAREIELEDK               | 42  | 23 | 4  | 12.5   | b8b14y9*y9                                | 2542.24 | 117.607 | 4426   | 3 | 848.08  | 2.02   |
| [P0A1D3]CH60_SALTY 60 kDa chaperonin | 35 | Phosphoryl STY(9)                   | VVINKDTTTHIDGVGEEAAIQGR               | 322 | 23 | 3  | 12.5   | b9b12_HPO3 b12y13                         | 2479.20 | 108.845 | 4406   | 3 | 827.07  | -13.88 |
| [P0A1D3]CH60_SALTY 60 kDa chaperonin | 36 | Oxidation+M(9)                      | AVAAGMNPMDLK                          | 105 | 12 | 4  | 25.26  | b6y4*y4y5                                 | 1233.60 | 62.670  | 5879   | 3 | 411.87  | 0.89   |
| [P0A1D3]CH60_SALTY 60 kDa chaperonin | 37 | Carbamidomethyl+C(18);Oxidation+M() | SALQYAASVAGLMITTECMVTDL PK            | 501 | 25 | 5  | 40.62  | b3b5b6b7b11                               | 2686.34 | 136.136 | 5060   | 3 | 896.12  | 8.91   |
| [P0A1D3]CH60_SALTY 60 kDa chaperonin | 38 |                                     | EDALHATR                              | 396 | 8  | 1  | 8.55   | b6                                        | 912.45  | 27.211  | 54134  | 2 | 456.73  | -6.76  |
| [P0A1D3]CH60_SALTY 60 kDa chaperonin | 39 |                                     | AAAVEELK                              | 124 | 8  | 0  | 2.22   |                                           | 830.46  | 48.050  | 9588   | 1 | 830.46  | -7.13  |
| [P0A1D3]CH60_SALTY 60 kDa chaperonin | 40 | Carbamidomethyl+C(4)                | SVPCSDSK                              | 134 | 8  | 0  | 2.22   |                                           | 879.40  | 36.021  | 3769   | 1 | 879.40  | 8.33   |
| [P0A1D3]CH60_SALTY 60 kDa chaperonin | 41 |                                     | EMLPVLEAVAK                           | 231 | 11 | 0  | 2.67   |                                           | 1181.64 | 80.119  | 13925  | 2 | 591.32  | -12.19 |
| [P0A1D3]CH60_SALTY 60 kDa chaperonin | 42 |                                     | QQIEEATSDYDREK                        | 350 | 14 | 0  | 4      |                                           | 1693.75 | 34.312  | 5797   | 3 | 565.26  | -6.34  |
| [P66032]RIBB_SALTY 3                 | 1  |                                     | MNQTLSSFGTPFER                        | 0   | 15 | 16 | 139.99 | b2b5b6b10b11y2y4y5*y5y6y7y8y9y10y11y15    | 1727.85 | 84.770  | 66215  | 2 | 864.43  | 5.09   |
| [P66032]RIBB_SALTY 3                 | 2  |                                     | VELALDALR                             | 15  | 9  | 8  | 57.97  | b2b3b7y1y3y4y7y9                          | 999.57  | 69.426  | 50785  | 2 | 500.29  | -8.49  |
| [P66032]RIBB_SALTY 3                 | 3  | Carbamidomethyl+C(23)               | GGHTEATIDLMTLAGFKPAGVLC ELTNDGDTMAR   | 150 | 34 | 5  | 35.95  | b3b8b9b10y1                               | 3562.73 | 123.587 | 29483  | 4 | 891.44  | 10.07  |

|                                                |   |                                               |                                |     |    |    |        |                                                 |         |         |        |   |         |        |
|------------------------------------------------|---|-----------------------------------------------|--------------------------------|-----|----|----|--------|-------------------------------------------------|---------|---------|--------|---|---------|--------|
| P66032 RIBB_SALTY 3                            | 4 | Carbamidomethyl+C(4)                          | APECIAFAGQHNMVVTIEDLVAYR       | 184 | 25 | 3  | 12.16  | y4y7°y7                                         | 2775.33 | 99.821  | 14055  | 4 | 694.59  | -9.15  |
| P66032 RIBB_SALTY 3                            | 5 |                                               | AQAGGVLTR                      | 141 | 9  | 3  | 29.37  | b5b8y5                                          | 872.49  | 30.061  | 57802  | 2 | 436.75  | -8.95  |
| P66032 RIBB_SALTY 3                            | 6 | Carbamidomethyl+C(7);<br>Carbamidomethyl+C(9) | HGSGIVCLCITEDR                 | 60  | 14 | 3  | 18.37  | b6y6y9                                          | 1616.73 | 82.293  | 2841   | 3 | 539.58  | -12.84 |
| P66032 RIBB_SALTY 3                            | 7 |                                               | DGAKPSDLNRPGHVFPLR             | 123 | 18 | 5  | 33.05  | b6b9b11b12y5                                    | 1976.08 | 36.072  | 1549   | 3 | 659.36  | 16.06  |
| P66032 RIBB_SALTY 3                            | 8 |                                               | MNQTLSSFGTPFERVELALDALR        | 0   | 24 | 4  | 21.5   | b10°b10b11y3                                    | 2708.40 | 118.489 | 14798  | 3 | 903.47  | -3.34  |
| P66313 RL6_SALTY 50S ribosomal<br>protein L6   | 1 |                                               | APVVVPAGVDVK                   | 6   | 12 | 15 | 124.07 | b2b3b4b5y1y2y3y4y5°y5y7<br>y8y9y10y12           | 1150.68 | 53.783  | 154684 | 2 | 575.84  | -5.62  |
| P66313 RL6_SALTY 50S ribosomal<br>protein L6   | 2 |                                               | TLNDAVEVK                      | 35  | 9  | 13 | 73.77  | b2°b2b3b4y1y2y3°y3y6°y6<br>y7y8y9               | 988.52  | 39.113  | 134375 | 2 | 494.77  | -7.35  |
| P66313 RL6_SALTY 50S ribosomal<br>protein L6   | 3 |                                               | ALLNSMVIGVTEGFTK               | 69  | 16 | 9  | 63.88  | y3y6°y6y8°y8y11y12y13y1<br>6                    | 1679.91 | 94.780  | 93436  | 2 | 840.46  | 2.54   |
| P66313 RL6_SALTY 50S ribosomal<br>protein L6   | 4 |                                               | INGQVITIK                      | 18  | 9  | 8  | 55.97  | b2°b2y3y5y7y8°y8y9                              | 985.60  | 49.088  | 93246  | 2 | 493.30  | -9.10  |
| P66313 RL6_SALTY 50S ribosomal<br>protein L6   | 5 |                                               | DGYADGWAQAGTAR                 | 55  | 14 | 3  | 26.95  | y7y9y11                                         | 1438.64 | 50.478  | 65069  | 2 | 719.82  | 1.95   |
| P66313 RL6_SALTY 50S ribosomal<br>protein L6   | 6 |                                               | LQLVGVGYYR                     | 86  | 9  | 5  | 37.15  | b2y3y5y6y9                                      | 1004.58 | 60.138  | 56945  | 2 | 502.79  | -10.69 |
| P66313 RL6_SALTY 50S ribosomal<br>protein L6   | 7 |                                               | TLNDAVEVKHADNALTFGPR           | 35  | 20 | 3  | 13.7   | b4y10y13                                        | 2168.10 | 92.977  | 35549  | 3 | 723.37  | -6.19  |
| P66313 RL6_SALTY 50S ribosomal<br>protein L6   | 8 |                                               | INGQVITIK                      | 18  | 9  | 0  | 1.78   |                                                 | 968.58  | 48.987  | 18282  | 2 | 484.79  | 2.71   |
| Q8ZLM1 RS13_SALTY 30S ribosomal<br>protein S13 | 1 |                                               | ISELSEEQIDTLRDEVAK             | 44  | 18 | 15 | 110.54 | b3°b3b11y4y8y9y10y13°y<br>13y14y15y16y17°y17y18 | 2075.03 | 66.636  | 164145 | 3 | 692.35  | -7.65  |
| Q8ZLM1 RS13_SALTY 30S ribosomal<br>protein S13 | 2 |                                               | IAGINIPDQK                     | 3   | 10 | 10 | 59.21  | b2b4y2°y2y4°y4y5y8y9y10                         | 1068.60 | 54.917  | 111098 | 2 | 534.80  | -8.57  |
| Q8ZLM1 RS13_SALTY 30S ribosomal<br>protein S13 | 3 |                                               | ISELSEEQIDTLR                  | 44  | 13 | 3  | 19.69  | b3b10y9                                         | 1532.80 | 61.805  | 13369  | 2 | 766.90  | 13.62  |
| Q8ZLM1 RS13_SALTY 30S ribosomal<br>protein S13 | 4 |                                               | EISMSIK                        | 71  | 7  | 7  | 49.06  | b2b4b5b6y5°y5y7                                 | 807.43  | 47.153  | 9899   | 1 | 807.43  | -3.78  |
| Q8ZLM1 RS13_SALTY 30S ribosomal<br>protein S13 | 5 |                                               | AILAAAGIAENVK                  | 31  | 13 | 6  | 43.73  | b3y5y7y9y10°y10                                 | 1240.71 | 61.558  | 12668  | 2 | 620.86  | -10.33 |
| P67093 UG_SALTY Universal stress<br>protein G  | 1 |                                               | TIIMPVDVFEMELSDK               | 3   | 16 | 11 | 82.06  | b2°b2b3y3y5y6y7y12y13y1<br>4y16                 | 1866.94 | 104.912 | 75697  | 2 | 933.97  | 8.83   |
| P67093 UG_SALTY Universal stress<br>protein G  | 2 |                                               | LQTMVGHFSDPSR                  | 69  | 14 | 9  | 64.32  | b2b4b7y3y4y6y7°y7y11                            | 1587.77 | 64.719  | 45107  | 3 | 529.93  | -13.53 |
| P67093 UG_SALTY Universal stress<br>protein G  | 3 |                                               | RFEHLQHEAETR                   | 56  | 13 | 3  | 19.69  | b6b9y6                                          | 1681.83 | 45.974  | 3184   | 2 | 841.42  | 14.81  |
| P67093 UG_SALTY Universal stress<br>protein G  | 4 |                                               | FEEHLQHEAETRLQTMVGHFSIDP<br>SR | 57  | 26 | 5  | 21.96  | b6y6y7°y7y12                                    | 3094.47 | 103.521 | 2920   | 2 | 1547.74 | -2.37  |
| P67093 UG_SALTY Universal stress<br>protein G  | 5 | Oxidation+M(6)                                | DVVNEMGEELDADV VVIGSR          | 94  | 20 | 4  | 18.67  | b5b11y4y15                                      | 2162.02 | 75.315  | 13251  | 3 | 721.34  | -5.53  |
| P67093 UG_SALTY Universal stress<br>protein G  | 6 | Oxidation+M(4)                                | TIIMPVDVFEMELSDK               | 3   | 16 | 5  | 26.41  | b9°b9y9y12y14                                   | 1882.94 | 88.718  | 6779   | 2 | 941.98  | 14.07  |
| P66643 RS9_SALTY 30S ribosomal<br>protein S9   | 1 |                                               | GGGISQAGAIR                    | 68  | 12 | 10 | 91.67  | b2b3b4b5b6y4y5y7y8y12                           | 1043.55 | 34.114  | 121002 | 2 | 522.28  | -6.67  |
| P66643 RS9_SALTY 30S ribosomal<br>protein S9   | 2 |                                               | SLEQYFGR                       | 33  | 8  | 10 | 60.54  | b2b3°b3y2y3y4y5°y5y6y8                          | 999.48  | 61.029  | 102006 | 2 | 500.24  | -8.67  |
| P66643 RS9_SALTY 30S ribosomal<br>protein S9   | 3 |                                               | QPLELVDMVEK                    | 49  | 11 | 6  | 26.28  | b8°b8y6°y6y7y11                                 | 1300.68 | 74.201  | 28486  | 2 | 650.85  | 1.31   |
| P66643 RS9_SALTY 30S ribosomal<br>protein S9   | 4 |                                               | VFIKPGNGK                      | 18  | 9  | 3  | 37.15  | y4y5y7                                          | 959.56  | 30.269  | 44083  | 2 | 480.28  | -12.15 |
| P66643 RS9_SALTY 30S ribosomal<br>protein S9   | 5 |                                               | AENQYYGTGR                     | 1   | 10 | 5  | 25.84  | b5°b5y4y6°y6                                    | 1158.52 | 27.411  | 32306  | 2 | 579.76  | -0.63  |

|                                             |    |                                     |                                    |     |    |    |       |                                            |         |         |        |   |         |        |
|---------------------------------------------|----|-------------------------------------|------------------------------------|-----|----|----|-------|--------------------------------------------|---------|---------|--------|---|---------|--------|
| P66643 RS9_SALTY 30S ribosomal protein S9   | 6  |                                     | AGFVTRDAR                          | 100 | 9  | 3  | 29.37 | b4y7y8                                     | 992.52  | 85.423  | 24594  | 2 | 496.76  | -4.86  |
| P66643 RS9_SALTY 30S ribosomal protein S9   | 7  |                                     | ALMEYDESLRGELR                     | 85  | 14 | 3  | 26.15 | b9b10b12                                   | 1681.82 | 84.066  | 1678   | 2 | 841.41  | -0.15  |
| P0A7X0 RS8_SALTY 30S ribosomal protein S8   | 1  |                                     | SMQDPIADMLTR                       | 1   | 12 | 12 | 94.68 | b2b3b4y2y3y4y6y8y9°y9y10y12                | 1377.65 | 78.415  | 205292 | 2 | 689.33  | -0.27  |
| P0A7X0 RS8_SALTY 30S ribosomal protein S8   | 2  |                                     | AVVESIQR                           | 69  | 8  | 18 | 87.89 | b1b2b3b4y1y2*y2y3*y3y4y5°y5y6°y6*y6y7y8*y8 | 901.50  | 33.453  | 155617 | 2 | 451.25  | -12.46 |
| P0A7X0 RS8_SALTY 30S ribosomal protein S8   | 3  |                                     | AAVTMPSSK                          | 22  | 9  | 10 | 65.75 | b2y2y3°y3y4°y4y5y6y7y9                     | 891.45  | 31.948  | 118918 | 2 | 446.23  | -8.22  |
| P0A7X0 RS8_SALTY 30S ribosomal protein S8   | 4  |                                     | MSMQDPIADMLTR                      | 0   | 13 | 4  | 19.69 | b6b8*b8y6                                  | 1508.72 | 42.985  | 3916   | 3 | 503.58  | 22.41  |
| P0A7X0 RS8_SALTY 30S ribosomal protein S8   | 5  | Oxidation+M(2)                      | SMQDPIADMLTR                       | 1   | 12 | 3  | 21.29 | b11y6y9                                    | 1393.66 | 70.703  | 9328   | 2 | 697.33  | 11.47  |
| P0A7X0 RS8_SALTY 30S ribosomal protein S8   | 6  |                                     | VTMPSSK                            | 24  | 7  | 0  | 1.78  |                                            | 749.38  | 31.939  | 21931  | 1 | 749.38  | -5.38  |
| P0A7X0 RS8_SALTY 30S ribosomal protein S8   | 7  |                                     | AVTMPSSK                           | 23  | 8  | 1  | 8.55  | b5                                         | 820.42  | 31.894  | 4210   | 2 | 410.71  | -4.91  |
| P66541 RS2_SALTY 30S ribosomal protein S2   | 1  |                                     | TVPMFNEALAE LNK                    | 45  | 14 | 14 | 109.4 | b3b7b8b9y1y3*y3y5y6y9*y9y11y12y14          | 1576.81 | 84.526  | 224917 | 2 | 788.91  | 1.70   |
| P66541 RS2_SALTY 30S ribosomal protein S2   | 2  |                                     | WLGGMLTNWK                         | 95  | 10 | 9  | 50.63 | b4b7y1y3*y3y4°y4y8y10                      | 1205.61 | 86.434  | 174061 | 2 | 603.31  | -5.37  |
| P66541 RS2_SALTY 30S ribosomal protein S2   | 3  | Carbamidomethyl+C(6)                | EAANSCDQFFVNHR                     | 81  | 14 | 8  | 56.46 | b4y1y3y4y8y9y11y14                         | 1694.72 | 48.124  | 43057  | 3 | 565.58  | -9.80  |
| P66541 RS2_SALTY 30S ribosomal protein S2   | 4  |                                     | EANNLGIPVFAIVDTNSDPDGVDFVIPGNDDAIR | 174 | 34 | 15 | 64.67 | b5°b5*b5b6b7*b7b26y3y4y7y8*y8y14y16*y16    | 3569.75 | 104.616 | 35565  | 3 | 1190.59 | 2.94   |
| P66541 RS2_SALTY 30S ribosomal protein S2   | 5  |                                     | SQDLASQAEESFVEAE                   | 225 | 16 | 5  | 16.33 | b4b13°b13y4y16                             | 1739.77 | 73.289  | 32232  | 2 | 870.39  | 7.58   |
| P66541 RS2_SALTY 30S ribosomal protein S2   | 6  |                                     | LKDLETQSQDGTFEK                    | 113 | 15 | 9  | 35.41 | b2y2°y2y3°y3y4y6y9y15                      | 1738.86 | 41.906  | 15344  | 2 | 869.94  | 8.00   |
| P66541 RS2_SALTY 30S ribosomal protein S2   | 7  |                                     | ILFVGTK                            | 66  | 7  | 4  | 52.07 | y3y4y5y6                                   | 777.47  | 57.686  | 46312  | 2 | 389.24  | -16.41 |
| P66541 RS2_SALTY 30S ribosomal protein S2   | 8  |                                     | YWNPK                              | 21  | 5  | 1  | 12.79 | b4                                         | 707.35  | 22.975  | 20186  | 1 | 707.35  | 4.31   |
| P66541 RS2_SALTY 30S ribosomal protein S2   | 9  |                                     | DLETQSQDGTFEK                      | 115 | 13 | 3  | 34.16 | b3b4b5                                     | 1497.68 | 41.082  | 8576   | 2 | 749.35  | 9.29   |
| P66541 RS2_SALTY 30S ribosomal protein S2   | 10 |                                     | AGVHFHGQTR                         | 11  | 10 | 5  | 25.84 | b6y5*y5y7°y7                               | 1109.54 | 29.249  | 2336   | 3 | 370.52  | -19.91 |
| P66541 RS2_SALTY 30S ribosomal protein S2   | 11 |                                     | YWNPKMKPFIFGAR                     | 21  | 14 | 3  | 26.95 | b3b5b9                                     | 1754.93 | 76.573  | 27954  | 2 | 877.97  | 4.87   |
| P66541 RS2_SALTY 30S ribosomal protein S2   | 12 | Oxidation+M(11)                     | LENSLGGIKDMGGLPDALFVIDADHEHIAIK    | 143 | 31 | 3  | 11.03 | b3b11y11                                   | 3304.68 | 103.280 | 34929  | 4 | 826.93  | -1.40  |
| P0A7K0 RL11_SALTY 50S ribosomal protein L11 | 1  |                                     | AQLQEIAQTK                         | 103 | 10 | 12 | 72    | b2*b2b3y2y3y4*y4y5y6y8*y8y10               | 1129.62 | 39.579  | 321366 | 2 | 565.31  | -4.11  |
| P0A7K0 RL11_SALTY 50S ribosomal protein L11 | 2  |                                     | AADMTGADIEAMTR                     | 113 | 14 | 17 | 142.1 | b2b3b7b11y2y3y4y5y6y7y8y9y10°y10y11°y11y14 | 1452.65 | 57.915  | 150336 | 2 | 726.83  | -0.17  |
| P0A7K0 RL11_SALTY 50S ribosomal protein L11 | 3  | Carbamidomethyl+C(29)               | LQVAAGMANPSPVGPALGQQGVNIMEFCK      | 10  | 30 | 6  | 28.36 | b6b7b10y9y20y22                            | 3081.57 | 136.224 | 4340   | 3 | 1027.86 | 13.39  |
| P0A7K0 RL11_SALTY 50S ribosomal protein L11 | 4  | Carbamidomethyl+C(29);Oxidation+M() | LQVAAGMANPSPVGPALGQQGVNIMEFCK      | 10  | 30 | 3  | 17.02 | b3b10b12                                   | 3097.52 | 133.189 | 5002   | 3 | 1033.18 | -0.87  |
| P0A7K0 RL11_SALTY 50S ribosomal protein L11 | 5  | Oxidation+M(2)                      | SMGLVVED                           | 134 | 8  | 5  | 49.5  | b6°b6b7y4y7                                | 865.41  | 91.130  | 1598   | 1 | 865.41  | 10.65  |
| P0A7K0 RL11_SALTY 50S ribosomal protein L11 | 6  |                                     | QLQEIAQTK                          | 104 | 9  | 0  | 2.22  |                                            | 1058.57 | 39.542  | 9172   | 2 | 529.79  | -8.88  |



|                                                                                    |    |                                                |                                                     |     |    |    |        |                                                      |         |         |       |   |         |        |
|------------------------------------------------------------------------------------|----|------------------------------------------------|-----------------------------------------------------|-----|----|----|--------|------------------------------------------------------|---------|---------|-------|---|---------|--------|
| [P40732]ARGD_SALTY<br>Acetylornithine/succinyl-diaminopimelate<br>aminotransferase | 1  |                                                | FAPSLVVEADIHEGMQR                                   | 377 | 18 | 13 | 118.33 | b10b11b12y1y5°y5y6y7y8y9y10y12y16                    | 2027.97 | 68.619  | 51178 | 3 | 676.66  | -6.50  |
| [P40732]ARGD_SALTY<br>Acetylornithine/succinyl-diaminopimelate<br>aminotransferase | 2  |                                                | VLFMNSGTEANETAFK                                    | 101 | 16 | 12 | 68.46  | b6b7b15y5°y5y10y11y12*y12y14*y14y16                  | 1758.84 | 68.086  | 41713 | 2 | 879.93  | 4.16   |
| [P40732]ARGD_SALTY<br>Acetylornithine/succinyl-diaminopimelate<br>aminotransferase | 3  |                                                | SQGETLWHTSNVFTNEPALR                                | 68  | 20 | 9  | 31.94  | b1b7y4y6y11°y11y14*y14y20                            | 2287.12 | 71.984  | 40952 | 3 | 763.04  | 2.78   |
| [P40732]ARGD_SALTY<br>Acetylornithine/succinyl-diaminopimelate<br>aminotransferase | 4  | Carbamidomethyl+C(8)                           | AVMDDHTCAVVVEPIQGEGGVQ<br>AATPEFLK                  | 180 | 30 | 7  | 21.28  | b10b12b13y1y2y5y30                                   | 3168.55 | 75.338  | 26452 | 3 | 1056.85 | 3.93   |
| [P40732]ARGD_SALTY<br>Acetylornithine/succinyl-diaminopimelate<br>aminotransferase | 5  |                                                | ATEQTAITR                                           | 1   | 9  | 3  | 37.15  | y5y6y7                                               | 990.51  | 23.533  | 18131 | 2 | 495.76  | -9.49  |
| [P40732]ARGD_SALTY<br>Acetylornithine/succinyl-diaminopimelate<br>aminotransferase | 6  | Carbamidomethyl+C(6);<br>Carbamidomethyl+C(20) | GLRDLCEHQALLVFDEVQCGM<br>GR                         | 210 | 24 | 3  | 12.2   | b4b6y12                                              | 2818.33 | 138.155 | 3199  | 3 | 940.11  | 8.23   |
| [P40732]ARGD_SALTY<br>Acetylornithine/succinyl-diaminopimelate<br>aminotransferase | 7  |                                                | MATEQTAITR                                          | 0   | 10 | 5  | 38.63  | b9y3°y3y7y8                                          | 1121.54 | 19.177  | 22074 | 2 | 561.27  | -20.46 |
| [P40732]ARGD_SALTY<br>Acetylornithine/succinyl-diaminopimelate<br>aminotransferase | 8  |                                                | YSDGFGPKPADIIHVPFNDLHAVK                            | 156 | 24 | 3  | 12.2   | b10b12y14                                            | 2637.41 | 86.485  | 15424 | 3 | 879.81  | 22.40  |
| [P40732]ARGD_SALTY<br>Acetylornithine/succinyl-diaminopimelate<br>aminotransferase | 9  |                                                | DFLYAGAEAGVMVLNAGADV MR                             | 355 | 22 | 7  | 37.46  | b3°b3b4b13b15b17y8                                   | 2270.05 | 96.943  | 10164 | 3 | 757.36  | -17.42 |
| [P40732]ARGD_SALTY<br>Acetylornithine/succinyl-diaminopimelate<br>aminotransferase | 10 |                                                | SLFTVSVGGQPK                                        | 144 | 12 | 3  | 31.5   | y3y5y8                                               | 1219.66 | 59.718  | 8366  | 2 | 610.33  | -10.61 |
| [P40732]ARGD_SALTY<br>Acetylornithine/succinyl-diaminopimelate<br>aminotransferase | 11 |                                                | ATFDEVILPVYAPADFIPVK                                | 10  | 20 | 7  | 36.94  | b5b6°b6b17y3y8y14                                    | 2205.16 | 103.409 | 1623  | 3 | 735.72  | -11.51 |
| [P40732]ARGD_SALTY<br>Acetylornithine/succinyl-diaminopimelate<br>aminotransferase | 12 |                                                | LIDATFAERVLFMNSGTEANETAF<br>K                       | 92  | 25 | 3  | 21.48  | b7y8y9                                               | 2775.37 | 99.607  | 73967 | 3 | 925.80  | 1.76   |
| [P40732]ARGD_SALTY<br>Acetylornithine/succinyl-diaminopimelate<br>aminotransferase | 13 | Carbamidomethyl+C(17)                          | EYIDFAGGIATV ALGHCHPALVEA<br>LKSQGETLWHTSNVFTNEPALR | 42  | 46 | 5  | 13.68  | b3°b3y8y21y23                                        | 5020.46 | 87.822  | 54054 | 4 | 1255.87 | -8.95  |
| [P40732]ARGD_SALTY<br>Acetylornithine/succinyl-diaminopimelate<br>aminotransferase | 14 |                                                | ATFDEVILPVYAPADFIPVK GK                             | 10  | 22 | 3  | 12.85  | b7y5y14                                              | 2390.29 | 94.827  | 29945 | 3 | 797.43  | -4.39  |
| [P40732]ARGD_SALTY<br>Acetylornithine/succinyl-diaminopimelate<br>aminotransferase | 15 | Carbamidomethyl+C(8)                           | AVMDDHTCAVVVEPIQGEGGVQ<br>AATPEFLKGLR               | 180 | 33 | 7  | 21.03  | b15b17°b17°b17b18y18*y18                             | 3494.69 | 136.737 | 8573  | 2 | 1747.85 | -14.60 |
| [P40732]ARGD_SALTY<br>Acetylornithine/succinyl-diaminopimelate<br>aminotransferase | 16 | Oxidation+M(23)                                | ARDFLYAGAEAGVMVLNAGADV<br>MR                        | 353 | 24 | 3  | 12.2   | b9b13y5                                              | 2513.20 | 79.408  | 3329  | 2 | 1257.10 | -11.85 |
| [P40732]ARGD_SALTY<br>Acetylornithine/succinyl-diaminopimelate<br>aminotransferase | 17 |                                                | PSLVVEADIHEGMQR                                     | 379 | 16 | 1  | 7.44   | b13                                                  | 1809.88 | 68.533  | 2291  | 2 | 905.44  | -2.50  |
| [Q7CR46]IRAP_SALTY Anti-adaptor<br>protein iraP                                    | 1  |                                                | QVEGALEGV KPDASVPDHDTELL<br>R                       | 50  | 24 | 10 | 51.17  | b6b9y2y3y6y7y9y10y14y24                              | 2575.26 | 60.145  | 67695 | 4 | 644.57  | -13.56 |
| [Q7CR46]IRAP_SALTY Anti-adaptor<br>protein iraP                                    | 2  |                                                | NMAQNEQEMLIR                                        | 38  | 12 | 9  | 66.66  | b3y6y7y8y9°y9y10°y10y12                              | 1476.70 | 56.536  | 60429 | 2 | 738.85  | 1.90   |
| [P0A299]RL7_SALTY 50S ribosomal<br>protein L7/L12                                  | 1  |                                                | DQIIEAVSAMSVM DVVELISAMEE<br>K                      | 5   | 25 | 22 | 148.88 | b2°b2°b2b3b4b5b6b7b8b10b13y2°y2y3y4y5°y5y6y7y9y10y25 | 2737.33 | 137.107 | 83447 | 3 | 913.12  | 0.09   |

|                                               |   |                   |                                  |     |    |    |        |                                                           |         |         |        |   |         |        |
|-----------------------------------------------|---|-------------------|----------------------------------|-----|----|----|--------|-----------------------------------------------------------|---------|---------|--------|---|---------|--------|
| P0A299 RL7_SALTY 50S ribosomal protein L7/L12 | 2 |                   | SLEEAGAEVEVK                     | 109 | 12 | 4  | 11.8   | b1b3°b3y9                                                 | 1260.64 | 59.478  | 15412  | 3 | 420.89  | 8.13   |
| P0A299 RL7_SALTY 50S ribosomal protein L7/L12 | 3 |                   | SITKDKIIEAVSAMSVMDEVVELISA MEEK  | 1   | 29 | 4  | 11.23  | b14y3°y3y5                                                | 3166.62 | 89.727  | 3316   | 3 | 1056.21 | 8.17   |
| P0A299 RL7_SALTY 50S ribosomal protein L7/L12 | 4 |                   | FGVSAAAAVAVAAGPAEAAEEK           | 30  | 22 | 8  | 47     | b7b11b13°b13b14b15y6y14                                   | 1987.02 | 70.622  | 1845   | 2 | 994.01  | 1.84   |
| P0A299 RL7_SALTY 50S ribosomal protein L7/L12 | 5 |                   | AAGANKVAVIK                      | 60  | 11 | 3  | 26.28  | b3b4y5                                                    | 1041.63 | 30.117  | 22544  | 2 | 521.32  | -13.59 |
| P0A299 RL7_SALTY 50S ribosomal protein L7/L12 | 6 |                   | FGVSAAAAVAVAAGPAEAAEEKT EFDVILK  | 30  | 30 | 6  | 15.84  | b6°b6b8b10°b10y14                                         | 2932.52 | 136.282 | 9074   | 3 | 978.18  | -2.00  |
| P0A299 RL7_SALTY 50S ribosomal protein L7/L12 | 7 |                   | EGVSKDDAEALK                     | 96  | 12 | 6  | 49.3   | b3b4y5y7y10°y10                                           | 1261.65 | 36.059  | 4622   | 2 | 631.33  | 15.00  |
| P0A299 RL7_SALTY 50S ribosomal protein L7/L12 | 8 |                   | MSITKDKIIEAVSAMSVMDEVVELI SAMEEK | 0   | 30 | 9  | 29.56  | b7°b7b9b14y7y9°y9y12y14                                   | 3297.62 | 103.625 | 2919   | 3 | 1099.88 | -5.11  |
| P0A299 RL7_SALTY 50S ribosomal protein L7/L12 | 9 | Phosphoryl.STY(8) | EAKDLVESAPAALK                   | 82  | 14 | 4  | 26.24  | b7b13y8y12                                                | 1521.73 | 66.672  | 78716  | 2 | 761.37  | -12.59 |
| P66038 RISB_SALTY 6                           | 1 |                   | IGQVKDDNITVVVWPGAYELPLA TEALAK   | 40  | 29 | 20 | 117.19 | b3b4b8b9°b9b10°b10°b10b11°b11b12b13°b13b14y2y4y9y14y15y29 | 3110.68 | 98.704  | 216206 | 3 | 1037.57 | 2.28   |
| P66038 RISB_SALTY 6                           | 2 |                   | FNQFINDSLLDGAVDALTR              | 21  | 19 | 17 | 126.78 | b3b4b5°b5b12b14°b14y2y4y5y6y8y9y10y13y14y19               | 2109.08 | 101.808 | 108005 | 2 | 1055.04 | 7.29   |
| P66038 RISB_SALTY 6                           | 3 |                   | GAEAALTALEMINVLK                 | 136 | 16 | 10 | 76.67  | b3b5b6b7b8b13b14°b14°b14y1                                | 1643.90 | 103.526 | 42946  | 2 | 822.45  | -4.23  |
| P66038 RISB_SALTY 6                           | 4 |                   | VAITIAI                          | 14  | 7  | 3  | 39.27  | y4y5y6                                                    | 743.46  | 44.855  | 27121  | 2 | 372.24  | -18.96 |
| P66038 RISB_SALTY 6                           | 5 |                   | MNIHK                            | 0   | 5  | 1  | 12.79  | b4                                                        | 618.37  | 49.353  | 6258   | 1 | 618.37  | 4.05   |
| P66038 RISB_SALTY 6                           | 6 |                   | ANVAAPDAR                        | 5   | 9  | 9  | 73.77  | b4°b4b7°b7y3y4y5°y5y7                                     | 884.45  | 23.116  | 3358   | 1 | 884.45  | -4.21  |
| P0A2A1 RL19_SALTY 50S ribosomal protein L19   | 1 |                   | VFQTHSPVVDIAVK                   | 72  | 15 | 13 | 103.94 | b2b6°b6b8b11b13y4y5y6y7y11y12y15                          | 1626.86 | 56.385  | 118927 | 3 | 542.96  | -13.43 |
| P0A2A1 RL19_SALTY 50S ribosomal protein L19   | 2 |                   | QLEQEQMK                         | 6   | 8  | 8  | 39.72  | b8y4y5°y5y7°y7y8°y8                                       | 1033.50 | 26.144  | 34575  | 2 | 517.25  | -0.35  |
| P0A2A1 RL19_SALTY 50S ribosomal protein L19   | 3 |                   | QNVPSFRPGDTVEVK                  | 14  | 15 | 6  | 24.5   | b4°b4b6y8°y8y11                                           | 1672.85 | 41.946  | 7909   | 2 | 836.93  | -7.66  |
| P0A2A1 RL19_SALTY 50S ribosomal protein L19   | 4 |                   | VWVVEGTK                         | 29  | 8  | 4  | 34.95  | b3b6°b6y7                                                 | 917.49  | 35.220  | 1741   | 1 | 917.49  | -19.82 |
| P0A2A1 RL19_SALTY 50S ribosomal protein L19   | 5 |                   | QLEQEQMKQNVPSFRPGDTVEVK          | 6   | 23 | 4  | 12.5   | b3°b3b6y12                                                | 2687.32 | 55.051  | 60930  | 4 | 672.59  | -9.54  |
| P0A2A1 RL19_SALTY 50S ribosomal protein L19   | 6 |                   | VFQTHSPVVDIAVK                   | 72  | 15 | 0  | 4.45   |                                                           | 1609.84 | 56.391  | 2137   | 3 | 537.29  | -6.90  |
| P66932 TIG_SALTY Trigger factor               | 1 |                   | NVALEEQAWEVLAK                   | 399 | 15 | 11 | 91.61  | b2b3b4b11b12y3y4y11y12y13y15                              | 1583.86 | 80.310  | 97772  | 2 | 792.43  | -2.85  |
| P66932 TIG_SALTY Trigger factor               | 2 |                   | ANDIDVPSALIDSEIDVLR              | 296 | 20 | 8  | 29.12  | b2°b2b3b4b13y1y14y16                                      | 2211.16 | 90.807  | 46839  | 3 | 737.72  | -2.21  |
| P66932 TIG_SALTY Trigger factor               | 3 |                   | FGVEDGSVAGLR                     | 255 | 12 | 8  | 56.87  | b2b4b8b9y7y9y11y12                                        | 1206.61 | 57.801  | 25197  | 2 | 603.81  | -4.05  |
| P66932 TIG_SALTY Trigger factor               | 4 |                   | ANDIDVPSALIDSEIDVLR              | 296 | 19 | 10 | 54.96  | b6b7°b7b10°b10b11y3y8y13y19                               | 2055.08 | 94.780  | 22590  | 2 | 1028.04 | 7.60   |
| P66932 TIG_SALTY Trigger factor               | 5 |                   | INPAGAPNYVPGEYK                  | 83  | 15 | 8  | 53.43  | b6y4°y4y5y7y9y13y15                                       | 1589.80 | 51.428  | 16471  | 2 | 795.40  | 2.00   |
| P66932 TIG_SALTY Trigger factor               | 6 |                   | SELVNVAK                         | 29  | 8  | 4  | 31.94  | b3b4°b4y3                                                 | 859.49  | 41.995  | 9019   | 2 | 430.25  | -1.21  |
| P66932 TIG_SALTY Trigger factor               | 7 |                   | GLIEEMASAYEDPKEVIEFYK            | 368 | 22 | 3  | 12.85  | b3y4y8                                                    | 2548.19 | 81.670  | 7853   | 3 | 850.07  | -11.78 |
| P66932 TIG_SALTY Trigger factor               | 8 |                   | ATDFVLAMGQGR                     | 181 | 12 | 5  | 35.84  | b4b7b9y7y12                                               | 1265.64 | 69.832  | 2007   | 2 | 633.32  | 6.85   |
| P66932 TIG_SALTY Trigger factor               | 9 |                   | YGASVR                           | 57  | 6  | 2  | 26.03  | b3b4                                                      | 652.34  | 27.324  | 15482  | 1 | 652.34  | -3.84  |

|                                          |    |                       |                                |     |    |    |        |                                               |         |         |       |   |         |        |
|------------------------------------------|----|-----------------------|--------------------------------|-----|----|----|--------|-----------------------------------------------|---------|---------|-------|---|---------|--------|
| P66932 TIG_SALTY Trigger factor          | 10 |                       | GLIEEMASAYEDPK                 | 368 | 14 | 4  | 29.41  | b6y5y6y10                                     | 1552.69 | 118.562 | 6977  | 1 | 1552.69 | -16.90 |
| P66932 TIG_SALTY Trigger factor          | 11 |                       | AGEEFTIDVTFPEEYHAENLK          | 206 | 21 | 3  | 21.7   | b8y8y9                                        | 2439.09 | 74.273  | 4914  | 4 | 610.53  | -18.62 |
| P66932 TIG_SALTY Trigger factor          | 12 |                       | QQATWK                         | 146 | 6  | 1  | 13.24  | b4                                            | 761.38  | 38.130  | 4321  | 2 | 381.20  | -14.35 |
| P66932 TIG_SALTY Trigger factor          | 13 |                       | ELPELTEEFIK                    | 243 | 11 | 6  | 50.62  | b4b6°b6b9y5y7                                 | 1347.73 | 85.422  | 3011  | 2 | 674.37  | 20.02  |
| P66932 TIG_SALTY Trigger factor          | 14 |                       | QVSVETTQGLGR                   | 1   | 12 | 4  | 21.29  | b5*b5b8y10                                    | 1274.64 | 114.584 | 1865  | 2 | 637.83  | -20.78 |
| P66932 TIG_SALTY Trigger factor          | 15 |                       | QDVLGDLMSRNFVDIIK              | 63  | 18 | 4  | 22.24  | b7b8°b8y3                                     | 2034.07 | 80.586  | 6726  | 3 | 678.69  | 0.54   |
| P66932 TIG_SALTY Trigger factor          | 16 |                       | AGEEFTIDVTFPEEYHAENLK GK       | 206 | 23 | 4  | 34.59  | b11b12b13y10                                  | 2624.25 | 76.283  | 3342  | 5 | 525.66  | -0.37  |
| P66932 TIG_SALTY Trigger factor          | 17 |                       | VSEKATSFNELMNQQA               | 416 | 16 | 3  | 24.03  | y4y10y12                                      | 1796.87 | 84.812  | 2538  | 2 | 898.94  | 10.12  |
| Q56073 DNAK_SALTY Chaperone protein dnaK | 1  |                       | IINEPTAAALAYGLDKEVGNR          | 167 | 21 | 18 | 125.28 | b3b4*b4b7b8y1y5°y5y6*y6y7y9y10y11y12y17y19y21 | 2215.16 | 74.999  | 57967 | 3 | 739.06  | -6.06  |
| Q56073 DNAK_SALTY Chaperone protein dnaK | 2  |                       | SLGQFNLDGINPAPR                | 452 | 15 | 12 | 38.21  | b1b2°b2b4*b4y1y4y5y7y10*y10y15                | 1598.84 | 72.041  | 34123 | 2 | 799.92  | 5.57   |
| Q56073 DNAK_SALTY Chaperone protein dnaK | 3  |                       | MQELAQVSQK                     | 587 | 10 | 8  | 38.63  | b2*b2b3y5*y5y6y8y10                           | 1161.59 | 37.834  | 33980 | 2 | 581.30  | -1.26  |
| Q56073 DNAK_SALTY Chaperone protein dnaK | 4  | Carbamidomethyl+C(12) | IIGIDLGTNSCVAIMDGTQAR          | 3   | 22 | 8  | 19.37  | b1y10°y10*y10y13y15°y15y22                    | 2306.13 | 81.539  | 27689 | 2 | 1153.57 | -8.05  |
| Q56073 DNAK_SALTY Chaperone protein dnaK | 5  |                       | QAVTNPQNTLFAIK                 | 56  | 14 | 8  | 46.67  | b6°b6b7b12°b12b13y10y14                       | 1544.84 | 67.597  | 24668 | 2 | 772.92  | -0.95  |
| Q56073 DNAK_SALTY Chaperone protein dnaK | 6  |                       | ASSGLNEEEIQK                   | 502 | 12 | 16 | 92.68  | b1b2y2*y2y4°y4y5y6°y6y7y8y9y10°y10*y10y12     | 1304.63 | 35.247  | 20915 | 2 | 652.82  | -4.30  |
| Q56073 DNAK_SALTY Chaperone protein dnaK | 7  |                       | TAEDYLGEVPTEAVITVPAYFNDAQR     | 125 | 26 | 7  | 62.31  | y5y6y7y8y9y12y26                              | 2869.39 | 93.566  | 18026 | 3 | 957.13  | -0.43  |
| Q56073 DNAK_SALTY Chaperone protein dnaK | 8  |                       | VAEFGKEPR                      | 352 | 10 | 6  | 46.41  | b1b3b5b8°b8y8                                 | 1179.63 | 44.564  | 16011 | 2 | 590.32  | 11.69  |
| Q56073 DNAK_SALTY Chaperone protein dnaK | 9  |                       | FEELVQTR                       | 528 | 8  | 4  | 49.5   | b3b7y3y4                                      | 1021.54 | 49.062  | 10326 | 2 | 511.28  | 13.20  |
| Q56073 DNAK_SALTY Chaperone protein dnaK | 10 |                       | FQDEEVQR                       | 76  | 8  | 4  | 34.95  | b4y2y4y6                                      | 1050.47 | 29.137  | 8954  | 2 | 525.74  | -11.39 |
| Q56073 DNAK_SALTY Chaperone protein dnaK | 11 |                       | VLENAEGDR                      | 25  | 9  | 8  | 51.71  | b1b2b3b5b8y5y9*y9                             | 1002.49 | 35.150  | 4870  | 2 | 501.75  | 5.05   |
| Q56073 DNAK_SALTY Chaperone protein dnaK | 12 |                       | LMEIAQQQHAQQAGSADASANNAK       | 597 | 25 | 3  | 21.48  | b5y10y11                                      | 2610.23 | 38.968  | 2367  | 3 | 870.75  | 0.56   |
| Q56073 DNAK_SALTY Chaperone protein dnaK | 13 |                       | TIAVYDLGGGTFDISIIIDEVDGEK      | 188 | 26 | 4  | 14.94  | b10b16y8y13                                   | 2769.32 | 119.797 | 53838 | 3 | 923.78  | -20.36 |
| Q56073 DNAK_SALTY Chaperone protein dnaK | 14 |                       | IIGADNGDAWLDDVK                | 92  | 14 | 4  | 26.95  | y6y8y12°y12                                   | 1486.76 | 70.551  | 16514 | 2 | 743.88  | 3.37   |
| Q56073 DNAK_SALTY Chaperone protein dnaK | 15 |                       | DVSIMPYK                       | 84  | 8  | 3  | 34.95  | b5b7y5                                        | 952.48  | 70.914  | 3027  | 2 | 476.74  | -2.24  |
| Q56073 DNAK_SALTY Chaperone protein dnaK | 16 |                       | IELSSAQQTQDVNLPYITADATGPK      | 270 | 24 | 3  | 18.51  | y4y7y11                                       | 2532.33 | 109.110 | 2769  | 3 | 844.78  | 17.84  |
| Q56073 DNAK_SALTY Chaperone protein dnaK | 17 |                       | AAIEAK                         | 581 | 6  | 1  | 13.24  | y3                                            | 602.35  | 30.542  | 2490  | 1 | 602.35  | -6.69  |
| Q56073 DNAK_SALTY Chaperone protein dnaK | 18 |                       | SIEPLKVALQDAGLSVSDINDVILVGGQTR | 315 | 30 | 3  | 11.12  | b3y3y5                                        | 3107.69 | 104.984 | 33051 | 3 | 1036.57 | 0.00   |
| Q56073 DNAK_SALTY Chaperone protein dnaK | 19 |                       | VLENAEGDRTPSIIAYTQDGETLVGQPAK  | 25  | 30 | 4  | 17.02  | b13°b13b16b24                                 | 3173.58 | 99.702  | 12143 | 4 | 794.15  | -4.46  |
| Q56073 DNAK_SALTY Chaperone protein dnaK | 20 |                       | EVGNRTIAVYDLGGGTFDISIIIDEVDGEK | 183 | 31 | 3  | 11.03  | b3y6y11                                       | 3324.69 | 88.909  | 8538  | 4 | 831.93  | 13.14  |

|                                             |    |                      |                                 |     |    |    |       |                             |         |         |        |   |         |        |
|---------------------------------------------|----|----------------------|---------------------------------|-----|----|----|-------|-----------------------------|---------|---------|--------|---|---------|--------|
| Q56073 DNAK_SALTY Chaperone protein dnaK    | 21 |                      | FEELVQTRNQGDHLLHSTR             | 528 | 19 | 3  | 21.19 | b7b9b12                     | 2280.16 | 90.433  | 5795   | 3 | 760.73  | 6.85   |
| Q56073 DNAK_SALTY Chaperone protein dnaK    | 22 |                      | IIGADNGDAWL DVKGQK              | 92  | 17 | 4  | 15.53 | b3b5y10*y10                 | 1799.92 | 136.221 | 5269   | 2 | 900.47  | -3.26  |
| Q56073 DNAK_SALTY Chaperone protein dnaK    | 23 |                      | RFQDEEVQR                       | 75  | 9  | 5  | 29.37 | b5°b5b7y7°y7                | 1206.58 | 118.526 | 3957   | 1 | 1206.58 | -9.00  |
| Q56073 DNAK_SALTY Chaperone protein dnaK    | 24 |                      | AKIELSSAQQT DVNLPYITADATG PK    | 268 | 26 | 6  | 14.94 | b4b14°b14y7°y7y11           | 2731.39 | 118.455 | 2752   | 3 | 911.14  | -7.42  |
| Q56073 DNAK_SALTY Chaperone protein dnaK    | 25 |                      | NDPLAMQRLK                      | 253 | 10 | 4  | 32.83 | b3b4°b4b8                   | 1185.65 | 28.337  | 2657   | 3 | 395.89  | 11.63  |
| Q56073 DNAK_SALTY Chaperone protein dnaK    | 26 |                      | DVSIMPYKIIGADNGDAWL DVK         | 84  | 22 | 9  | 36.63 | b5b6°b6b7b15°b15y9°y9*y9    | 2420.24 | 93.828  | 2366   | 3 | 807.42  | 10.19  |
| Q56073 DNAK_SALTY Chaperone protein dnaK    | 27 |                      | VALQDAGLSVSDINDVILVGGQT RMPMVQK | 321 | 30 | 9  | 34.47 | b7°b7°b7b9°b9b10b11y10°y10  | 3154.66 | 137.227 | 2173   | 3 | 1052.23 | 1.39   |
| Q56073 DNAK_SALTY Chaperone protein dnaK    | 28 |                      | TAEDYLGEVPTEAVITVPAYFNDA QRQATK | 125 | 30 | 4  | 25.65 | b3b6b7b11                   | 3297.58 | 110.315 | 2116   | 3 | 1099.87 | -13.03 |
| Q56073 DNAK_SALTY Chaperone protein dnaK    | 29 | Phosphoryl STY(17)   | IELSSAQQT DVNLPYITADATGPK       | 270 | 24 | 7  | 35.53 | b6b7°b7y6y7°y7y12_H3PO4 y12 | 2612.21 | 86.644  | 6665   | 3 | 871.41  | -11.31 |
| Q56073 DNAK_SALTY Chaperone protein dnaK    | 30 | Phosphoryl STY(9)    | TTPSIIAYTQDGETLVGQPAK           | 34  | 21 | 3  | 21.7  | b12y12y13                   | 2270.11 | 86.694  | 6519   | 3 | 757.37  | 10.43  |
| Q56073 DNAK_SALTY Chaperone protein dnaK    | 31 | Phosphoryl STY(11)   | FQDEEVQR DVSIMPYK               | 76  | 16 | 3  | 22.86 | b12y3y4                     | 2063.90 | 88.852  | 1588   | 3 | 688.64  | -0.47  |
| Q56073 DNAK_SALTY Chaperone protein dnaK    | 32 | Oxidation+M(2)       | LMEIAQQQHAQQAGSADASAN NAK       | 597 | 25 | 6  | 25.68 | b11b13y6°y6y8y9             | 2626.23 | 92.964  | 6832   | 2 | 1313.62 | -0.09  |
| Q56073 DNAK_SALTY Chaperone protein dnaK    | 33 | Oxidation+M(2)       | GMPQIEVTFDIDADGILHVS AK         | 467 | 22 | 4  | 12.85 | b9b11°b11y11                | 2372.19 | 116.192 | 2080   | 2 | 1186.60 | 3.29   |
| Q8ZK81 RS18_SALTY 30S ribosomal protein S18 | 1  |                      | YLSLLPYTDR                      | 63  | 10 | 7  | 66.2  | b2y4y5y6y7y8y10             | 1240.65 | 75.264  | 125454 | 2 | 620.83  | -6.10  |
| Q8ZK81 RS18_SALTY 30S ribosomal protein S18 | 2  |                      | NYITESGK                        | 30  | 8  | 7  | 52.51 | b1y3y4°y4y5y6y8             | 911.45  | 30.043  | 45364  | 2 | 456.23  | -1.54  |
| Q8ZK81 RS18_SALTY 30S ribosomal protein S18 | 3  |                      | IVPSR                           | 38  | 5  | 2  | 12.79 | y3°y3                       | 571.36  | 46.283  | 23921  | 1 | 571.36  | -1.07  |
| Q8ZK81 RS18_SALTY 30S ribosomal protein S18 | 4  |                      | FTAEGVQEIDYK                    | 12  | 12 | 9  | 71.88 | b4b6°b6b7b8y3y8*y8y11       | 1399.69 | 40.971  | 12370  | 2 | 700.35  | 14.56  |
| P64052 EFTS_SALTY Elongation factor Ts      | 1  |                      | ITDVEVLK                        | 104 | 8  | 10 | 73.33 | b2°b2b3y2y3y4y5y6y7y8       | 916.53  | 49.282  | 193665 | 2 | 458.77  | -10.52 |
| P64052 EFTS_SALTY Elongation factor Ts      | 2  |                      | AEITASLVK                       | 1   | 9  | 10 | 88.33 | b3°b3b4b7y1y4y5y6y7y9       | 931.54  | 49.366  | 128952 | 2 | 466.27  | -9.04  |
| P64052 EFTS_SALTY Elongation factor Ts      | 3  |                      | FTGEVSLTGQPFVMEPSK              | 222 | 18 | 7  | 44.39 | b5b7b10b14b15y3y18          | 1953.97 | 74.767  | 107116 | 2 | 977.49  | 4.75   |
| P64052 EFTS_SALTY Elongation factor Ts      | 4  |                      | IGENINIR                        | 125 | 8  | 6  | 52.51 | y3y4y5y7*y7y8               | 928.51  | 45.265  | 94526  | 2 | 464.76  | -11.17 |
| P64052 EFTS_SALTY Elongation factor Ts      | 5  | Carbamidomethyl+C(8) | TGAGMMDCKK                      | 15  | 10 | 5  | 40.61 | b2y3y5y7y10                 | 1098.47 | 21.646  | 49057  | 2 | 549.74  | -3.44  |
| P64052 EFTS_SALTY Elongation factor Ts      | 6  |                      | ALTEANGDIELAIENMRK              | 25  | 18 | 5  | 14.83 | b2b16y5*y5y11               | 1987.99 | 74.384  | 45321  | 3 | 663.33  | -11.30 |
| P64052 EFTS_SALTY Elongation factor Ts      | 7  |                      | VLDAAVAGK                       | 95  | 9  | 9  | 91.34 | b2b5b6b8y3y4y6y7y9          | 843.48  | 34.311  | 32648  | 2 | 422.24  | -14.40 |
| P64052 EFTS_SALTY Elongation factor Ts      | 8  |                      | AGNVAADGVIK                     | 52  | 11 | 6  | 46.07 | y2y4y6y7y8y11               | 1014.55 | 37.385  | 27253  | 2 | 507.78  | -5.78  |
| P64052 EFTS_SALTY Elongation factor Ts      | 9  |                      | AQFEEER                         | 112 | 7  | 7  | 39.27 | b2°b2b5y3°y3y5y7            | 908.40  | 25.327  | 13902  | 2 | 454.70  | -10.28 |
| P64052 EFTS_SALTY Elongation factor Ts      | 10 |                      | ALTEANGDIELAIENMR               | 25  | 17 | 5  | 34.5  | b5y7y9y11y12                | 1859.93 | 80.754  | 11542  | 2 | 930.47  | 7.74   |
| P64052 EFTS_SALTY Elongation factor Ts      | 11 |                      | VASLEGDVLGSYQHGAR               | 134 | 17 | 6  | 40.52 | b3b6b13y4y8y10              | 1758.85 | 59.526  | 175797 | 3 | 586.95  | -16.03 |
| P64052 EFTS_SALTY Elongation factor Ts      | 12 |                      | IGVLVAAK                        | 151 | 8  | 3  | 34.95 | b3y5y7                      | 770.50  | 47.882  | 76237  | 2 | 385.75  | -16.56 |

|                                                            |    |                      |                                |     |    |    |       |                                        |         |         |        |   |         |        |
|------------------------------------------------------------|----|----------------------|--------------------------------|-----|----|----|-------|----------------------------------------|---------|---------|--------|---|---------|--------|
| [P64052 EFTS_SALTY Elongation factor Ts                    | 13 |                      | QLAMHVAASKPEFVKPEDVSADV<br>VEK | 167 | 26 | 10 | 38.46 | b5b11°b11y5y6°y6y7°y7y10°y10           | 2824.48 | 136.356 | 6685   | 3 | 942.16  | 7.87   |
| [P64052 EFTS_SALTY Elongation factor Ts                    | 14 |                      | FEVGEGIEK                      | 258 | 9  | 4  | 29.37 | b8y6y7°y7                              | 1007.49 | 116.077 | 4565   | 1 | 1007.49 | -13.39 |
| [P64052 EFTS_SALTY Elongation factor Ts                    | 15 |                      | KALTEANGDIELAIENMR             | 24  | 18 | 5  | 21.99 | y9°y9y12y14°y14                        | 1988.02 | 67.005  | 19123  | 2 | 994.51  | 4.05   |
| [P64052 EFTS_SALTY Elongation factor Ts                    | 16 | Phosphoryl STY(5)    | MAEITASLVKELRER                | 0   | 15 | 4  | 28.14 | b4b11b12_H3PO4 b12y12                  | 1825.90 | 112.280 | 2912   | 2 | 913.46  | -6.35  |
| [P64052 EFTS_SALTY Elongation factor Ts                    | 17 | Oxidation+M(16)      | ALTEANGDIELAIENMRK             | 25  | 18 | 5  | 31.15 | b8b12y4y5y13                           | 2004.02 | 85.417  | 2218   | 3 | 668.68  | 6.70   |
| [P64052 EFTS_SALTY Elongation factor Ts                    | 18 |                      | ITASLVK                        | 3   | 7  | 0  | 1.78  |                                        | 731.46  | 49.364  | 16976  | 1 | 731.46  | -7.93  |
| [P64052 EFTS_SALTY Elongation factor Ts                    | 19 |                      | TDVEVLK                        | 105 | 7  | 5  | 39.72 | b3°b3b4b5°b5                           | 803.44  | 49.277  | 7100   | 1 | 803.44  | -13.60 |
| [P64052 EFTS_SALTY Elongation factor Ts                    | 20 | Carbamidomethyl+C(7) | GAGMMDCKK                      | 16  | 9  | 1  | 8.03  | b3                                     | 997.42  | 21.572  | 6146   | 2 | 499.22  | -3.30  |
| [P64052 EFTS_SALTY Elongation factor Ts                    | 21 |                      | LDAAVAGK                       | 96  | 8  | 1  | 8.55  | b3                                     | 744.42  | 34.288  | 2330   | 1 | 744.42  | -7.05  |
| [P66593 RS6_SALTY 30S ribosomal protein S6                 | 1  |                      | YSAAITGAEGK                    | 24  | 11 | 13 | 94.23 | b2°b2b3b4b9y2y3°y3y5y6y9y10y11         | 1067.53 | 34.079  | 183566 | 2 | 534.27  | -8.23  |
| [P66593 RS6_SALTY 30S ribosomal protein S6                 | 2  |                      | HAVTEASPMVK                    | 93  | 11 | 8  | 64.66 | b2b5b10y4y5y7y9y11                     | 1169.59 | 31.849  | 87767  | 2 | 585.30  | -4.38  |
| [P66593 RS6_SALTY 30S ribosomal protein S6                 | 3  |                      | RDDFANETADDAEAGDSEE            | 112 | 19 | 5  | 33.82 | b9b10b11y1y19                          | 2056.80 | 42.968  | 7804   | 2 | 1028.91 | 9.50   |
| [P66593 RS6_SALTY 30S ribosomal protein S6                 | 4  |                      | FNDAVIR                        | 79  | 7  | 8  | 80.67 | b3°b3b5y3y4y5°y5y6                     | 834.43  | 43.008  | 121065 | 2 | 417.72  | -16.60 |
| [P66593 RS6_SALTY 30S ribosomal protein S6                 | 5  |                      | HYEIVFMVHPDQSEQVPGMIER         | 2   | 22 | 4  | 12.85 | b8y4y9°y9                              | 2641.20 | 37.243  | 15152  | 3 | 881.07  | -20.52 |
| [P66593 RS6_SALTY 30S ribosomal protein S6                 | 6  |                      | LEDWGR                         | 38  | 6  | 2  | 13.24 | y4°y4                                  | 775.38  | 39.263  | 7386   | 1 | 775.38  | 11.97  |
| [P66593 RS6_SALTY 30S ribosomal protein S6                 | 7  | Oxidation+M(6)       | AHYVLMNVEAPQEVIDELETTFR        | 56  | 23 | 4  | 19.15 | b3b8b12y10                             | 2720.35 | 112.394 | 7006   | 2 | 1360.68 | 8.97   |
| [P66193 RL31B_SALTY 50S ribosomal protein L31 type B       | 1  |                      | MKPDIHVPYR                     | 0   | 10 | 6  | 37.84 | b3b6y2y4y8y10                          | 1255.68 | 43.021  | 73532  | 3 | 419.23  | 11.18  |
| [P66193 RL31B_SALTY 50S ribosomal protein L31 type B       | 2  |                      | TFDSESSAAR                     | 62  | 10 | 7  | 50.39 | b1y5y6y7y8°y8y10                       | 1070.47 | 25.386  | 71536  | 2 | 535.74  | -6.39  |
| [P66193 RL31B_SALTY 50S ribosomal protein L31 type B       | 3  |                      | SHPFYTGR                       | 52  | 8  | 10 | 47.74 | b2b7y1y2y4°y4y5y6°y6y8                 | 964.46  | 34.339  | 52892  | 2 | 482.73  | -1.20  |
| [P66193 RL31B_SALTY 50S ribosomal protein L31 type B       | 4  |                      | TEREIELDGVTYPYVTIDVSSK         | 30  | 22 | 4  | 17.16 | b5b7y6y11                              | 2514.25 | 114.038 | 2368   | 3 | 838.75  | -4.27  |
| [P66193 RL31B_SALTY 50S ribosomal protein L31 type B       | 5  |                      | TVVFHDTSANEYVK                 | 10  | 14 | 10 | 86.54 | b11b12y3y8y9°y9°y9y10y11y12            | 1609.76 | 47.758  | 358414 | 3 | 537.26  | -16.83 |
| [P66193 RL31B_SALTY 50S ribosomal protein L31 type B       | 6  |                      | VGSTIKTER                      | 24  | 9  | 5  | 52.96 | y3°y3y4y5y8                            | 990.55  | 18.987  | 38963  | 2 | 495.78  | -8.13  |
| [P66193 RL31B_SALTY 50S ribosomal protein L31 type B       | 7  |                      | TVVFHDTSANEYVKVGSTIK           | 10  | 20 | 3  | 23.12 | b7b8b13                                | 2195.14 | 103.669 | 26516  | 3 | 732.39  | 4.67   |
| [P66193 RL31B_SALTY 50S ribosomal protein L31 type B       | 8  |                      | QKTFDSESSAAR                   | 60  | 12 | 7  | 74.89 | b6b8b11y4y5y7y8                        | 1326.62 | 35.254  | 2989   | 2 | 663.81  | -10.12 |
| [P66193 RL31B_SALTY 50S ribosomal protein L31 type B       | 9  |                      | SHPFYTGR                       | 52  | 8  | 0  | 1.33  |                                        | 946.44  | 34.353  | 2124   | 3 | 316.15  | -10.51 |
| [P0A2H9 DSBA_SALTY Thioldisulfide interchange protein dsbA | 1  |                      | AAADLQLQGVPMFVNGK              | 158 | 18 | 14 | 68.35 | b2b5b6b8b10b15b18y2y3°y3y4y8y10y18     | 1829.96 | 80.659  | 69821  | 2 | 915.48  | 2.00   |
| [P0A2H9 DSBA_SALTY Thioldisulfide interchange protein dsbA | 2  |                      | YQINPQGMDTSSMDVVFVQQYAD<br>TVK | 176 | 25 | 15 | 29.57 | b2°b2b4°b4b6°b6b8b11y1y7°y7°y7y9°y9y25 | 2865.31 | 86.434  | 24620  | 2 | 1433.16 | 2.04   |
| [P0A2H9 DSBA_SALTY Thioldisulfide interchange protein dsbA | 3  |                      | TQTVQSAADIR                    | 116 | 11 | 8  | 23.27 | b2°b2b3y2y5y7°y9y11                    | 1189.61 | 35.960  | 23121  | 2 | 595.31  | -3.90  |

|                                                            |    |                      |                                  |     |    |    |        |                                                |         |         |        |   |         |        |
|------------------------------------------------------------|----|----------------------|----------------------------------|-----|----|----|--------|------------------------------------------------|---------|---------|--------|---|---------|--------|
| P0A2H9 DSBA_SALTY Thiol:disulfide interchange protein dsbA | 4  |                      | TQTVQSAADIRK                     | 116 | 12 | 3  | 21.29  | b8b10y6                                        | 1317.70 | 51.305  | 14742  | 3 | 439.90  | -11.49 |
| P0A2H9 DSBA_SALTY Thiol:disulfide interchange protein dsbA | 5  |                      | ELTQAWAVAMALGVEDK                | 88  | 17 | 4  | 35.69  | b13b14y6y7                                     | 1831.91 | 53.682  | 4234   | 4 | 458.73  | -11.13 |
| P0A2H9 DSBA_SALTY Thiol:disulfide interchange protein dsbA | 6  | Oxidation+M(21)      | YHVEFLGPLGKELTQAWAVAMALGVEDK     | 77  | 28 | 7  | 24.33  | b4°b4b6y9y11y12°y12                            | 3088.56 | 78.598  | 6806   | 4 | 772.89  | -8.14  |
| P0A2H9 DSBA_SALTY Thiol:disulfide interchange protein dsbA | 7  | Oxidation+M(10)      | ELTQAWAVAMALGVEDK                | 88  | 17 | 3  | 22.52  | b8b9y11                                        | 1847.92 | 136.223 | 2238   | 2 | 924.46  | 0.79   |
| P67537 YBED_SALTY UPF0250 protein ybeD                     | 1  |                      | LNELLEFPPTPTYK                   | 4   | 14 | 8  | 37.27  | b2b3b12°b12y5y7y8y14                           | 1711.89 | 94.814  | 13864  | 2 | 856.45  | 0.21   |
| P67537 YBED_SALTY UPF0250 protein ybeD                     | 2  |                      | VMGQALPELVDQVVEVVQR              | 18  | 19 | 4  | 14.23  | b11y1y6y13                                     | 2109.12 | 109.074 | 10699  | 3 | 703.71  | -5.90  |
| P67537 YBED_SALTY UPF0250 protein ybeD                     | 3  |                      | GNYHSVSITINATHIEQVETLYEELGNIDIVR | 52  | 32 | 3  | 16.78  | b9b12b24                                       | 3627.86 | 112.282 | 7159   | 3 | 1209.96 | 7.94   |
| P67537 YBED_SALTY UPF0250 protein ybeD                     | 4  |                      | HAPGDYSPTVKPSSK                  | 37  | 15 | 6  | 35.38  | b4b10y4y13y14°y14                              | 1570.77 | 76.298  | 10578  | 2 | 785.89  | -12.98 |
| P02910 HISJ_SALTY Histidine-binding periplasmic protein    | 1  |                      | VGVLQGTQTETFGNEHWAPK             | 135 | 20 | 11 | 66.56  | b2b3b4y2y4y7y9y11y12y17y20                     | 2199.08 | 63.865  | 68531  | 3 | 733.70  | -3.33  |
| P02910 HISJ_SALTY Histidine-binding periplasmic protein    | 2  |                      | IGTDPTYAPFESK                    | 29  | 13 | 14 | 129.53 | b2b4b5b10y3y5y6y7y8y9°y9y11y12y13              | 1425.69 | 55.770  | 65362  | 2 | 713.35  | 0.17   |
| P02910 HISJ_SALTY Histidine-binding periplasmic protein    | 3  | Carbamidomethyl+C(5) | INTQCTFVENPLDALIPSLK             | 62  | 20 | 6  | 18.67  | b9b16y2y4y6y20                                 | 2273.20 | 104.052 | 54664  | 2 | 1137.10 | 6.66   |
| P02910 HISJ_SALTY Histidine-binding periplasmic protein    | 4  |                      | NSDIQPTVASLK                     | 120 | 12 | 15 | 84.68  | b2°b2*b2b3°b3*b3b4b10y3y7y8*y8y9y10y12         | 1272.68 | 48.676  | 51783  | 2 | 636.84  | -2.49  |
| P02910 HISJ_SALTY Histidine-binding periplasmic protein    | 5  |                      | FGGPAVKDEK                       | 201 | 10 | 8  | 52.39  | b2b5b8b9y4y5°y5y10                             | 1047.54 | 27.426  | 9373   | 2 | 524.27  | -9.79  |
| P02910 HISJ_SALTY Histidine-binding periplasmic protein    | 6  |                      | IDAAFQDEVAASEGFLK                | 176 | 17 | 3  | 15.53  | b6b15y16                                       | 1810.90 | 86.570  | 2364   | 2 | 905.95  | 5.93   |
| P02910 HISJ_SALTY Histidine-binding periplasmic protein    | 7  |                      | LFGVGTGMGLR                      | 211 | 11 | 7  | 45.85  | b4b6°b6b7y5y7°y7                               | 1107.60 | 41.998  | 6511   | 2 | 554.30  | -1.21  |
| P02910 HISJ_SALTY Histidine-binding periplasmic protein    | 8  |                      | AFAEMR                           | 234 | 6  | 2  | 26.03  | b3y5                                           | 724.35  | 37.045  | 5387   | 1 | 724.35  | 3.12   |
| P02910 HISJ_SALTY Histidine-binding periplasmic protein    | 9  |                      | ADGTYEK                          | 240 | 7  | 5  | 61.85  | b4y3y4y5y6                                     | 783.37  | 34.185  | 4401   | 2 | 392.19  | 20.88  |
| P02910 HISJ_SALTY Histidine-binding periplasmic protein    | 10 |                      | IGTDPTYAPFESKNAQGELVGFDIDLAK     | 29  | 28 | 3  | 11.36  | b9b13y4                                        | 2996.50 | 129.906 | 2158   | 3 | 999.51  | 4.16   |
| P02910 HISJ_SALTY Histidine-binding periplasmic protein    | 11 |                      | IRIGTDPTYAPFESK                  | 27  | 15 | 4  | 36.6   | b10b11b12y10                                   | 1694.90 | 55.956  | 1715   | 3 | 565.64  | 12.46  |
| P02910 HISJ_SALTY Histidine-binding periplasmic protein    | 12 |                      | EALNKAFEMR                       | 229 | 11 | 3  | 30.26  | y5y6y9                                         | 1279.66 | 107.766 | 1602   | 2 | 640.33  | 10.40  |
| P02910 HISJ_SALTY Histidine-binding periplasmic protein    | 13 |                      | GGPAVKDEK                        | 202 | 9  | 0  | 2.22   |                                                | 900.49  | 27.388  | 4298   | 2 | 450.75  | 12.95  |
| P67904 RS10_SALTY 30S ribosomal protein S10                | 1  |                      | LIDQSTAEIVETAK                   | 16  | 14 | 17 | 130.27 | b2b3b10y3y4°y4y5y7y8y9y10y11*y11y12°y12*y12y14 | 1517.81 | 55.845  | 152973 | 2 | 759.41  | 0.88   |
| P67904 RS10_SALTY 30S ribosomal protein S10                | 2  |                      | GPIPLPTRK                        | 37  | 9  | 5  | 29.37  | b2b3y4y6y9                                     | 978.60  | 44.002  | 88576  | 2 | 489.80  | -9.79  |
| P67904 RS10_SALTY 30S ribosomal protein S10                | 3  |                      | LVDIVEPTEK                       | 72  | 10 | 9  | 66.2   | b2y2y3y4y5°y5y6y8y10                           | 1142.62 | 52.294  | 48732  | 2 | 571.82  | -6.41  |
| P67904 RS10_SALTY 30S ribosomal protein S10                | 4  |                      | FTVLISPHVNKDAR                   | 48  | 14 | 4  | 15.12  | y4°y5°y5y9                                     | 1596.88 | 55.406  | 10193  | 2 | 798.94  | -5.73  |
| P67904 RS10_SALTY 30S ribosomal protein S10                | 5  |                      | DQYEIR                           | 62  | 6  | 1  | 13.24  | y4                                             | 823.40  | 71.977  | 11074  | 2 | 412.20  | 8.90   |

|                                                         |    |                       |                                  |     |    |    |       |                                         |         |         |       |   |         |        |
|---------------------------------------------------------|----|-----------------------|----------------------------------|-----|----|----|-------|-----------------------------------------|---------|---------|-------|---|---------|--------|
| P67904 RS10_SALTY 30S ribosomal protein S10             | 6  | Phosphoryl STY(6)     | FTVLISPHVNKDARDQYEIR             | 48  | 20 | 3  | 13.7  | b6y4y14                                 | 2481.25 | 98.224  | 2037  | 3 | 827.76  | 13.58  |
| P67904 RS10_SALTY 30S ribosomal protein S10             | 7  |                       | IPLPTRK                          | 39  | 7  | 0  | 1.78  |                                         | 824.52  | 44.011  | 11350 | 2 | 412.77  | -13.92 |
| P0A1P6 GLNA_SALTY Glutamine synthetase                  | 1  |                       | LVPGYEAPVMLAYSAR                 | 322 | 16 | 11 | 79.05 | b2b15y4y5y8°y8y9y10y11y14y16            | 1736.92 | 77.616  | 51928 | 2 | 868.96  | 6.82   |
| P0A1P6 GLNA_SALTY Glutamine synthetase                  | 2  |                       | GGYFPVPPVDSAQDIR                 | 177 | 16 | 6  | 26.41 | b6y2y6y10y12y16                         | 1717.87 | 70.228  | 39700 | 2 | 859.44  | 7.11   |
| P0A1P6 GLNA_SALTY Glutamine synthetase                  | 3  |                       | AINALANPTTNSYK                   | 307 | 14 | 11 | 93.56 | y3°y3y5y7y8°y8y9y10y12°y12y14           | 1477.76 | 48.460  | 35024 | 2 | 739.39  | -0.74  |
| P0A1P6 GLNA_SALTY Glutamine synthetase                  | 4  |                       | EIPQVAGSLEEALNALDLDR             | 406 | 20 | 6  | 18.67 | b7b14*b14y4y10y20                       | 2153.10 | 96.022  | 27944 | 3 | 718.37  | -3.63  |
| P0A1P6 GLNA_SALTY Glutamine synthetase                  | 5  |                       | ATGIADTVLFGPEPEFFLFDDIR          | 117 | 23 | 16 | 72.26 | b2b3°b3b6b8b12y2y3y5y6y8°y8y9y10°y10y23 | 2570.28 | 117.624 | 21528 | 3 | 857.43  | 0.57   |
| P0A1P6 GLNA_SALTY Glutamine synthetase                  | 6  |                       | GINESDMVLPDASTAVIDPFFADSTLIIR    | 59  | 30 | 8  | 50    | b4b9b10y2y3y4y11y12                     | 3238.61 | 113.823 | 19095 | 3 | 1080.21 | 3.54   |
| P0A1P6 GLNA_SALTY Glutamine synthetase                  | 7  | Carbamidomethyl+C(11) | FPDPAANPYLCFAALLMAGLDGIK         | 360 | 24 | 7  | 22.25 | b3b11°b11b14y6y15°y15                   | 2565.29 | 136.644 | 17751 | 3 | 855.77  | 1.24   |
| P0A1P6 GLNA_SALTY Glutamine synthetase                  | 8  |                       | NLYDLPPEEAK EIPQVAGSLEEALNALDLDR | 395 | 31 | 5  | 13.2  | b7°b7b11y7y11                           | 3422.78 | 80.774  | 7780  | 3 | 1141.60 | 12.55  |
| P0A1P6 GLNA_SALTY Glutamine synthetase                  | 9  |                       | NLYDLPPEEAK                      | 395 | 11 | 3  | 23.27 | b5b8y6                                  | 1288.62 | 80.529  | 2321  | 2 | 644.82  | -14.02 |
| P0A1P6 GLNA_SALTY Glutamine synthetase                  | 10 |                       | MSAEHVLTMLNEHEVK                 | 0   | 16 | 4  | 16.33 | b13°b13y8y10                            | 1867.89 | 99.770  | 8151  | 3 | 623.30  | -7.52  |
| P0A1P6 GLNA_SALTY Glutamine synthetase                  | 11 |                       | AGGVFTDEAIDAYIALR                | 430 | 17 | 4  | 22.52 | b15b16°b16y12                           | 1781.89 | 92.580  | 6486  | 2 | 891.45  | -10.34 |
| P0A1P6 GLNA_SALTY Glutamine synthetase                  | 12 |                       | YVVHNV AHR                       | 240 | 9  | 3  | 29.37 | b3y3y7                                  | 1094.57 | 27.338  | 4146  | 3 | 365.53  | -16.51 |
| P0A1P6 GLNA_SALTY Glutamine synthetase                  | 13 |                       | YAGLSEQALYYIGGV I K              | 287 | 17 | 5  | 35.51 | b3b6b8°b8b10                            | 1844.94 | 35.215  | 3770  | 3 | 615.65  | -21.30 |
| P0A1P6 GLNA_SALTY Glutamine synthetase                  | 14 |                       | EQHVTIPAHQVNAEFFE EGK            | 28  | 20 | 9  | 43.47 | b4b5°b5b7°b7b9y5y9y12                   | 2310.09 | 114.593 | 3138  | 3 | 770.70  | -11.20 |
| P0A1P6 GLNA_SALTY Glutamine synthetase                  | 15 |                       | SAEHVLTMLNEHEVK                  | 1   | 15 | 7  | 35.38 | b3b6b9°b9y5y8°y8                        | 1736.90 | 33.533  | 2533  | 4 | 434.98  | 18.77  |
| P0A1P6 GLNA_SALTY Glutamine synthetase                  | 16 |                       | MTPHPVEFELYYSV                   | 455 | 14 | 3  | 23.81 | b4b5y12                                 | 1711.83 | 83.459  | 1507  | 3 | 571.28  | 14.76  |
| P0A1P6 GLNA_SALTY Glutamine synthetase                  | 17 | Carbamidomethyl+C(11) | FPDPAANPYLCFAALLMAGLDGIK NK      | 360 | 26 | 3  | 17.86 | b3b6b14                                 | 2807.41 | 129.309 | 30900 | 3 | 936.48  | -4.00  |
| P0A1P6 GLNA_SALTY Glutamine synthetase                  | 18 |                       | AEDYL RATGIADTVLFGPEPEFFLFDDIR   | 111 | 29 | 6  | 24.84 | b7°b7b10b11b20y5                        | 3317.60 | 47.026  | 13704 | 5 | 664.33  | -10.89 |
| P0A1P6 GLNA_SALTY Glutamine synthetase                  | 19 |                       | RAEDYLR                          | 110 | 7  | 3  | 36.26 | b5b6y5                                  | 922.47  | 34.422  | 10396 | 2 | 461.74  | -5.03  |
| P0A1P6 GLNA_SALTY Glutamine synthetase                  | 20 |                       | MSAEHVLTMLNEHEVKFVDLR            | 0   | 21 | 5  | 21.7  | b10°b10b11°b11y17                       | 2498.25 | 134.823 | 1602  | 3 | 833.42  | -0.78  |
| P0A1P6 GLNA_SALTY Glutamine synthetase                  | 21 | Phosphoryl STY(7)     | GKEQHVTIPAHQVNAEFFE EGK          | 26  | 22 | 5  | 19.86 | b6°b6b8b10y5                            | 2575.22 | 127.230 | 8024  | 3 | 859.08  | 11.09  |
| P0A1P6 GLNA_SALTY Glutamine synthetase                  | 22 |                       | ALANPTTNSYK                      | 310 | 11 | 0  | 4     |                                         | 1179.59 | 48.540  | 18188 | 3 | 393.87  | -8.59  |
| Q8ZRN1 METQ_SALTY D-methionine-binding lipoprotein metQ | 1  |                       | DGIFVEDKDSPYVNLIVTREDNKDAENVK    | 215 | 29 | 9  | 23.97 | b3°b3b4b12y1y8°y8y12y29                 | 3322.61 | 70.593  | 29110 | 4 | 831.41  | -10.73 |
| Q8ZRN1 METQ_SALTY D-methionine-binding lipoprotein metQ | 2  |                       | SLDELKDGSQVAVPNDPTNLGR           | 122 | 22 | 9  | 43.52 | b5b9b12b13y2y6y7°y7y9                   | 2325.17 | 58.322  | 21594 | 3 | 775.73  | -0.11  |
| Q8ZRN1 METQ_SALTY D-methionine-binding lipoprotein metQ | 3  |                       | TFVYPIAGYSK                      | 108 | 11 | 7  | 23.27 | b4°b4b10y2°y2y10y11                     | 1245.64 | 64.641  | 15553 | 2 | 623.33  | -5.68  |

|                                                                   |    |                       |                        |     |    |    |        |                                          |         |         |       |   |         |        |
|-------------------------------------------------------------------|----|-----------------------|------------------------|-----|----|----|--------|------------------------------------------|---------|---------|-------|---|---------|--------|
| Q8ZRN1 METQ_SALTY D-methionine-binding lipoprotein metQ           | 4  |                       | YGLDVELVTFNDYVLPNEALSK | 56  | 22 | 3  | 12.85  | b5y11y13                                 | 2499.23 | 108.889 | 1801  | 3 | 833.75  | -12.31 |
| Q8ZRN1 METQ_SALTY D-methionine-binding lipoprotein metQ           | 5  |                       | DGIFVEDK               | 215 | 8  | 3  | 34.95  | b4b7y4                                   | 922.45  | 124.686 | 13424 | 1 | 922.45  | 1.92   |
| Q8ZRN1 METQ_SALTY D-methionine-binding lipoprotein metQ           | 6  |                       | IVELEAPQLPR            | 178 | 11 | 3  | 26.28  | b3y5y6                                   | 1264.73 | 66.407  | 12099 | 2 | 632.87  | 2.32   |
| Q8ZRN1 METQ_SALTY D-methionine-binding lipoprotein metQ           | 7  |                       | DGVGLLPTSLDIVENPK      | 158 | 17 | 4  | 21.71  | b9b12y4y7                                | 1766.98 | 81.694  | 8561  | 3 | 589.67  | 17.55  |
| Q8ZRN1 METQ_SALTY D-methionine-binding lipoprotein metQ           | 8  |                       | FVQAYQSDEVYEAANK       | 245 | 16 | 4  | 27.08  | b6y5y6y9                                 | 1861.87 | 51.454  | 7618  | 2 | 931.44  | 3.67   |
| Q8ZRN1 METQ_SALTY D-methionine-binding lipoprotein metQ           | 9  |                       | GDIDANAFQHKKPYLDQQIK   | 78  | 19 | 3  | 22.01  | b11b12y6                                 | 2201.10 | 90.285  | 5847  | 3 | 734.37  | 1.44   |
| Q8ZRN1 METQ_SALTY D-methionine-binding lipoprotein metQ           | 10 |                       | VGLIK                  | 151 | 5  | 1  | 12.79  | b3                                       | 529.37  | 26.891  | 3439  | 1 | 529.37  | -10.38 |
| Q8ZRN1 METQ_SALTY D-methionine-binding lipoprotein metQ           | 11 |                       | DGSQVAVPNDPTNLGR       | 128 | 16 | 3  | 16.33  | b7y6y12                                  | 1639.80 | 65.884  | 2167  | 3 | 547.27  | -1.79  |
| Q8ZRN1 METQ_SALTY D-methionine-binding lipoprotein metQ           | 12 | Carbamidomethyl+C(17) | TFAAVGALIGSLALAGCGQDEK | 6   | 22 | 4  | 12.85  | b7°b7y6y9                                | 2149.07 | 136.322 | 2013  | 2 | 1075.04 | -10.91 |
| Q8ZRN1 METQ_SALTY D-methionine-binding lipoprotein metQ           | 13 |                       | KFVQAYQSDEVYEAANK      | 244 | 17 | 4  | 33.72  | b11°b11b12b13                            | 1989.96 | 94.742  | 4906  | 2 | 995.48  | 2.94   |
| P00924 ENO1_YEAST Enolase 1                                       | 1  |                       | VNQIGTLESSEIK          | 346 | 12 | 10 | 90.7   | b2b3b9y3y5y6y8y9y10y12                   | 1288.71 | 54.901  | 86462 | 2 | 644.86  | -3.41  |
| P00924 ENO1_YEAST Enolase 1                                       | 2  |                       | NVNDVIAPAFVK           | 67  | 12 | 16 | 112.24 | b2b4°b4b5°b5°b5b6°b6b7y3y5y7y9y10°y10y12 | 1286.71 | 66.346  | 85824 | 2 | 643.86  | -2.37  |
| P00924 ENO1_YEAST Enolase 1                                       | 3  |                       | SIVPSGASTGVHEALEMR     | 32  | 18 | 5  | 41.15  | b13b17y10y11y12                          | 1840.91 | 74.197  | 34326 | 3 | 614.31  | -4.04  |
| P00924 ENO1_YEAST Enolase 1                                       | 4  |                       | WLTGPQLADLYHSLMK       | 272 | 16 | 3  | 16.33  | b11b14y6                                 | 1872.95 | 82.648  | 5969  | 2 | 936.98  | -8.86  |
| P00924 ENO1_YEAST Enolase 1                                       | 5  |                       | AVDDFLISLDGTANK        | 88  | 15 | 3  | 25.35  | y8y12y13                                 | 1578.79 | 63.732  | 2977  | 3 | 526.94  | -5.57  |
| P00924 ENO1_YEAST Enolase 1                                       | 6  |                       | AADALLK                | 338 | 8  | 3  | 39.72  | y4y6y7                                   | 814.49  | 54.416  | 67686 | 2 | 407.75  | -16.19 |
| P00924 ENO1_YEAST Enolase 1                                       | 7  |                       | IEEELGDNAVFAGENFHHGDK  | 415 | 21 | 4  | 13.25  | b9°b9b11y9                               | 2328.09 | 81.535  | 44960 | 3 | 776.70  | 16.15  |
| P00924 ENO1_YEAST Enolase 1                                       | 8  |                       | TAGIQIVADDLTVTNPK      | 312 | 17 | 3  | 33.72  | y11y12y13                                | 1755.95 | 72.460  | 32950 | 2 | 878.48  | 1.88   |
| P00924 ENO1_YEAST Enolase 1                                       | 9  |                       | NVPLYK                 | 126 | 6  | 1  | 13.24  | y4                                       | 733.42  | 37.776  | 19987 | 1 | 733.42  | -4.66  |
| P00924 ENO1_YEAST Enolase 1                                       | 10 |                       | TFAEALR                | 178 | 7  | 6  | 67.87  | b4b5°b5b6y4y6                            | 807.44  | 36.073  | 4065  | 2 | 404.22  | 1.74   |
| P00924 ENO1_YEAST Enolase 1                                       | 11 |                       | AAGHDGK                | 234 | 7  | 3  | 39.27  | b4y4y6                                   | 655.32  | 46.113  | 3309  | 1 | 655.32  | 8.10   |
| P00924 ENO1_YEAST Enolase 1                                       | 12 |                       | YDLDFK                 | 258 | 6  | 1  | 13.24  | y3                                       | 800.38  | 43.623  | 2120  | 2 | 400.69  | -0.92  |
| P00924 ENO1_YEAST Enolase 1                                       | 13 |                       | AVDDFLISLDGTANKSK      | 88  | 17 | 3  | 15.53  | b13y9y15                                 | 1793.91 | 65.248  | 94695 | 2 | 897.46  | -7.55  |
| P00924 ENO1_YEAST Enolase 1                                       | 14 |                       | GNPTVEVELTTEKGVFR      | 15  | 17 | 4  | 24.18  | b10b11b14°b14                            | 1875.97 | 105.257 | 13712 | 2 | 938.49  | -5.53  |
| P00924 ENO1_YEAST Enolase 1                                       | 15 |                       | TFAEALRIGSEVYHNLK      | 178 | 17 | 3  | 22.52  | b3b4y9                                   | 1948.01 | 68.720  | 7141  | 2 | 974.51  | -8.08  |
| P00924 ENO1_YEAST Enolase 1                                       | 16 |                       | SIVPSGASTGVHEALEMRDGDK | 32  | 22 | 8  | 37.46  | b5y5y8°y8y12y13y15°y15                   | 2256.07 | 87.817  | 3294  | 3 | 752.69  | -10.39 |
| P00924 ENO1_YEAST Enolase 1                                       | 17 | Phosphoryl STY(13)    | WLTGPQLADLYHSLMKR      | 272 | 17 | 4  | 26.18  | b12y5y6y11                               | 2109.01 | 91.927  | 5190  | 4 | 528.01  | -9.49  |
| P00924 ENO1_YEAST Enolase 1                                       | 18 | Phosphoryl STY(15)    | AAQDSFAAGWGVMSHR       | 358 | 17 | 3  | 15.53  | b14b16y12                                | 1869.77 | 136.776 | 1630  | 1 | 1869.77 | -14.49 |
| P00924 ENO1_YEAST Enolase 1                                       | 19 | Oxidation+M(15)       | WLTGPQLADLYHSLMK       | 272 | 16 | 4  | 23.01  | b4b8y5y9                                 | 1888.98 | 85.606  | 12274 | 2 | 944.99  | 8.01   |
| P00924 ENO1_YEAST Enolase 1                                       | 20 | Oxidation+M(17)       | SIVPSGASTGVHEALEMR     | 32  | 18 | 4  | 20.57  | b8b14y4y14                               | 1856.91 | 99.757  | 2927  | 3 | 619.64  | -5.65  |
| P0A2C7 POTD_SALTY ermidine/putrescine-binding periplasmic protein | 1  |                       | EGGIFWMDSLAIPANAK      | 249 | 17 | 10 | 40.69  | b3b6°b6b7b11y12y5y12y17                  | 1819.91 | 93.783  | 48468 | 2 | 910.46  | 4.90   |



|                                                                         |    |                 |                                                 |     |    |    |       |                          |         |         |       |   |         |        |
|-------------------------------------------------------------------------|----|-----------------|-------------------------------------------------|-----|----|----|-------|--------------------------|---------|---------|-------|---|---------|--------|
| P0A2C7 POTD_SALTY<br>ermidine/putrescine-binding periplasmic<br>protein | 2  |                 | QAGTPLEVVPWK                                    | 237 | 12 | 7  | 21.29 | b2*b2b3b10*b10b12y8      | 1324.72 | 75.232  | 41918 | 2 | 662.87  | -1.29  |
| P0A2C7 POTD_SALTY<br>ermidine/putrescine-binding periplasmic<br>protein | 3  |                 | EVAETIGYPTPNLAAR                                | 285 | 16 | 7  | 40    | b3*b3y5y8y10y13y16       | 1701.88 | 61.176  | 28509 | 2 | 851.44  | 0.14   |
| P0A2C7 POTD_SALTY<br>ermidine/putrescine-binding periplasmic<br>protein | 4  |                 | EVFQMALR                                        | 170 | 8  | 6  | 65.31 | b5b7y2y3y4y6             | 993.51  | 63.786  | 18687 | 2 | 497.26  | -4.98  |
| P0A2C7 POTD_SALTY<br>ermidine/putrescine-binding periplasmic<br>protein | 5  |                 | NSLLLTDDAR                                      | 160 | 10 | 3  | 27.6  | b3y5y6                   | 1117.57 | 53.453  | 9823  | 2 | 559.29  | -13.11 |
| P0A2C7 POTD_SALTY<br>ermidine/putrescine-binding periplasmic<br>protein | 6  |                 | QAGTPLEVVPWKEGGIFWMDSLA<br>IPANAK               | 237 | 29 | 3  | 21.64 | b5y3y4                   | 3125.65 | 123.302 | 5501  | 4 | 782.17  | 12.11  |
| P0A2C7 POTD_SALTY<br>ermidine/putrescine-binding periplasmic<br>protein | 7  |                 | LGYSGNTTDPKEIEAAYEELK                           | 179 | 21 | 3  | 21.7  | b6b7y5                   | 2328.11 | 78.935  | 3926  | 3 | 776.71  | -5.35  |
| P0A2C7 POTD_SALTY<br>ermidine/putrescine-binding periplasmic<br>protein | 8  |                 | SLYPDAQTISK                                     | 312 | 11 | 3  | 30.26 | b5b6b9                   | 1222.66 | 72.357  | 18307 | 2 | 611.83  | 21.67  |
| P0A2C7 POTD_SALTY<br>ermidine/putrescine-binding periplasmic<br>protein | 9  |                 | LTNFHNLDPEMLNKPFDPNNDYS<br>VPYIWGATAIGVNSDAIDPK | 103 | 43 | 4  | 11.25 | b5*b5y9y15               | 4803.29 | 95.752  | 14399 | 4 | 1201.58 | -2.54  |
| P0A2C7 POTD_SALTY<br>ermidine/putrescine-binding periplasmic<br>protein | 10 |                 | DGAYDLVVPSTYYVDK                                | 73  | 16 | 3  | 16.33 | b10y6y11                 | 1804.83 | 68.617  | 4645  | 3 | 602.28  | -20.63 |
| P0A2C7 POTD_SALTY<br>ermidine/putrescine-binding periplasmic<br>protein | 11 |                 | EIEAAYEELK                                      | 190 | 10 | 5  | 32.83 | b3b5*b5b6*b6             | 1194.57 | 104.551 | 2043  | 1 | 1194.57 | -15.84 |
| P0A2C7 POTD_SALTY<br>ermidine/putrescine-binding periplasmic<br>protein | 12 |                 | EVAETIGYPTPNLAARK                               | 285 | 17 | 3  | 22.93 | b7b9b12                  | 1829.96 | 88.839  | 94276 | 3 | 610.66  | -9.81  |
| P0A2C7 POTD_SALTY<br>ermidine/putrescine-binding periplasmic<br>protein | 13 |                 | KLMPNVAAFNSDNPANPYMEGE<br>VNLGMVWNGSAFVAR       | 200 | 37 | 3  | 37.85 | y11y12y13                | 4010.88 | 95.014  | 49665 | 4 | 1003.48 | -4.69  |
| P0A2C7 POTD_SALTY<br>ermidine/putrescine-binding periplasmic<br>protein | 14 |                 | VIYSTYESNETMYAKLK                               | 53  | 17 | 4  | 15.53 | b4y11*y11y13             | 2039.97 | 99.274  | 38554 | 3 | 680.66  | -15.08 |
| P0A2C7 POTD_SALTY<br>ermidine/putrescine-binding periplasmic<br>protein | 15 | Oxidation+M(15) | NSLLLTDDAREVFQMALR                              | 160 | 18 | 4  | 22.24 | b3*b3y4y5                | 2108.11 | 127.906 | 2030  | 3 | 703.38  | 15.06  |
| P0A2C7 POTD_SALTY<br>ermidine/putrescine-binding periplasmic<br>protein | 16 |                 | NSLLLTDD                                        | 160 | 8  | 0  | 2.22  |                          | 890.43  | 53.469  | 59847 | 2 | 445.72  | -14.39 |
| P0A2C7 POTD_SALTY<br>ermidine/putrescine-binding periplasmic<br>protein | 17 |                 | QAGTPLEVVPWKEGGIFWM                             | 237 | 19 | 2  | 12.23 | y4y10                    | 2145.09 | 123.293 | 4955  | 3 | 715.70  | 0.68   |
| Q8ZRP4 DAPD_SALTY 2                                                     | 1  |                 | EAVNQVISLLDSGALR                                | 28  | 16 | 7  | 55.01 | b6*b6y5y6y7y9y10         | 1684.93 | 92.399  | 70807 | 2 | 842.97  | 4.85   |
| Q8ZRP4 DAPD_SALTY 2                                                     | 2  |                 | MQQLQNVIETAFER                                  | 0   | 14 | 6  | 18.37 | b2b3y6y12*y12y14         | 1706.86 | 86.179  | 65391 | 2 | 853.93  | 2.29   |
| Q8ZRP4 DAPD_SALTY 2                                                     | 3  |                 | INDNQVIDGAESR                                   | 68  | 13 | 10 | 92.69 | b8b9y5y7y8y9*y9y10y12y13 | 1430.69 | 41.888  | 41102 | 2 | 715.85  | 0.51   |
| Q8ZRP4 DAPD_SALTY 2                                                     | 4  |                 | FADYDEAR                                        | 89  | 8  | 8  | 47.74 | b2b3*b3y2y5y6y7*y7       | 986.42  | 35.211  | 19502 | 2 | 493.71  | 0.62   |
| Q8ZRP4 DAPD_SALTY 2                                                     | 5  |                 | IDGQVWTHQWLK                                    | 48  | 12 | 5  | 48.34 | b7b8b9y7y11              | 1510.76 | 73.322  | 22033 | 2 | 755.88  | -13.17 |
| Q8ZRP4 DAPD_SALTY 2                                                     | 6  |                 | ADITPANVDTVTR                                   | 15  | 13 | 4  | 19.69 | b10*b10b12y5             | 1372.71 | 49.093  | 10247 | 2 | 686.86  | 1.96   |
| Q8ZRP4 DAPD_SALTY 2                                                     | 7  |                 | QQLQNVIETAFER                                   | 1   | 13 | 3  | 19.69 | b5b8y6                   | 1575.82 | 68.567  | 8411  | 2 | 788.41  | 2.25   |
| Q8ZRP4 DAPD_SALTY 2                                                     | 8  |                 | IYDR                                            | 213 | 4  | 1  | 12.35 | b3                       | 566.29  | 36.038  | 8177  | 1 | 566.29  | -9.27  |
| Q8ZRP4 DAPD_SALTY 2                                                     | 9  |                 | IYDRETGEVHYGR                                   | 213 | 13 | 6  | 33.06 | b11*b11b12y10*y10y12     | 1594.76 | 136.637 | 14716 | 1 | 1594.76 | -1.38  |

|                                             |    |                       |                                              |     |    |    |       |                                        |         |         |       |   |         |        |
|---------------------------------------------|----|-----------------------|----------------------------------------------|-----|----|----|-------|----------------------------------------|---------|---------|-------|---|---------|--------|
| Q8ZRP4 DAPD_SALTY 2                         | 10 |                       | AVLLSFRINDNQVIDGAESR                         | 61  | 20 | 5  | 29.65 | y4y6y8y9*y9                            | 2217.15 | 104.860 | 1533  | 2 | 1109.08 | -5.95  |
| Q7CPE2 ATPB_SALTY ATP synthase subunit beta | 1  |                       | QLDPLVVGQEHYDTAR                             | 343 | 16 | 8  | 63.25 | b13y3y5y6y9°y9y10y11                   | 1840.90 | 58.398  | 63243 | 3 | 614.30  | -10.15 |
| Q7CPE2 ATPB_SALTY ATP synthase subunit beta | 2  | Carbamidomethyl+C(6)  | VIDLMCPFAK                                   | 132 | 10 | 9  | 71.21 | b1b3b6b8y4y7y8°y8y10                   | 1193.59 | 80.991  | 52192 | 2 | 597.30  | -14.11 |
| Q7CPE2 ATPB_SALTY ATP synthase subunit beta | 3  |                       | TVNMMELIR                                    | 156 | 9  | 8  | 43.93 | b3b9y3y6°y6y7y9*y9                     | 1106.56 | 76.329  | 37142 | 2 | 553.79  | -4.30  |
| Q7CPE2 ATPB_SALTY ATP synthase subunit beta | 4  |                       | TIAMGSSDGLRR                                 | 53  | 12 | 4  | 21.29 | b11y3y10y12                            | 1263.64 | 38.327  | 31539 | 2 | 632.32  | -6.38  |
| Q7CPE2 ATPB_SALTY ATP synthase subunit beta | 5  |                       | QIASLGIYPAVDPLDSTSR                          | 324 | 19 | 9  | 55.54 | b4y2y4y5y7y11y12y14y19                 | 2003.05 | 80.421  | 28938 | 2 | 1002.03 | 3.84   |
| Q7CPE2 ATPB_SALTY ATP synthase subunit beta | 6  |                       | VGLFGGAGVGK                                  | 145 | 11 | 4  | 35.27 | b3y4y7y8                               | 961.53  | 59.524  | 27432 | 2 | 481.27  | -13.58 |
| Q7CPE2 ATPB_SALTY ATP synthase subunit beta | 7  |                       | VALTGLTMAEK                                  | 219 | 11 | 9  | 82.45 | b2y3y4y5y7°y8y9y10y11                  | 1133.61 | 59.600  | 23636 | 2 | 567.31  | -7.86  |
| Q7CPE2 ATPB_SALTY ATP synthase subunit beta | 8  |                       | AAPSYEELSNSQELLETKIK                         | 112 | 20 | 4  | 13.7  | b13b15y1y12                            | 2179.09 | 73.676  | 23630 | 2 | 1090.05 | 5.49   |
| Q7CPE2 ATPB_SALTY ATP synthase subunit beta | 9  |                       | VYDALEVQNGNEK                                | 25  | 13 | 3  | 19.69 | b5y7y12                                | 1478.74 | 71.706  | 21246 | 2 | 739.88  | 21.63  |
| Q7CPE2 ATPB_SALTY ATP synthase subunit beta | 10 |                       | VSLVYGQMNEPPGNR                              | 202 | 15 | 3  | 17.27 | b6y11y13                               | 1660.79 | 79.448  | 3298  | 2 | 830.90  | -13.60 |
| Q7CPE2 ATPB_SALTY ATP synthase subunit beta | 11 |                       | NIAIEHSGYSVFAGVGER                           | 165 | 18 | 8  | 29.38 | b9b11°b11b14°b14y5y15°y15              | 1905.93 | 105.208 | 1997  | 2 | 953.47  | -8.84  |
| Q7CPE2 ATPB_SALTY ATP synthase subunit beta | 12 | Carbamidomethyl+C(26) | AAPSYEELSNSQELLETKIKVIDLMCPFAK               | 112 | 30 | 5  | 18.2  | b6b9y4y6y10                            | 3353.67 | 121.182 | 31501 | 3 | 1118.56 | 0.80   |
| Q7CPE2 ATPB_SALTY ATP synthase subunit beta | 13 |                       | IMNVLGEPVDMKGEIGEEER                         | 87  | 20 | 4  | 13.7  | b11°b11b13y4                           | 2245.07 | 69.843  | 6889  | 3 | 749.03  | -4.24  |
| Q7CPE2 ATPB_SALTY ATP synthase subunit beta | 14 |                       | TIAMGSSDGLRR                                 | 53  | 12 | 3  | 21.29 | b6b11y11                               | 1263.63 | 75.257  | 5433  | 2 | 632.32  | -12.17 |
| Q7CPE2 ATPB_SALTY ATP synthase subunit beta | 15 | Phosphoryl STY(8)     | QIASLGIYPAVDPLDSTSR                          | 324 | 19 | 5  | 40.49 | b3b11_H3PO4<br>b11y9y10y11             | 2083.00 | 117.374 | 5732  | 3 | 695.00  | -2.93  |
| Q7CPE2 ATPB_SALTY ATP synthase subunit beta | 16 | Oxidation+M(1)        | MPSAVGYQPTLAEEMGVLQER                        | 261 | 21 | 3  | 13.25 | b7b14y14                               | 2322.13 | 88.462  | 11804 | 3 | 774.72  | 9.25   |
| Q7CPE2 ATPB_SALTY ATP synthase subunit beta | 17 | Oxidation+M(2)        | IMNVLGEPVDMK                                 | 87  | 12 | 5  | 30.77 | b8°b8b11y7y11                          | 1361.70 | 91.130  | 11388 | 2 | 681.35  | 10.94  |
| Q7CPE2 ATPB_SALTY ATP synthase subunit beta | 18 | Oxidation+M(4)        | TIAMGSSDGLR                                  | 53  | 11 | 4  | 35.27 | b6y4y5y7                               | 1123.55 | 74.955  | 4823  | 2 | 562.28  | 8.37   |
| Q7CPE2 ATPB_SALTY ATP synthase subunit beta | 19 |                       | AMGSSDGLRR                                   | 55  | 10 | 0  | 3.11  |                                        | 1049.51 | 38.276  | 18740 | 2 | 525.26  | -5.70  |
| P0A1H3 EFG_SALTY Elongation factor G        | 1  |                       | IATDPFVGNLTFFR                               | 323 | 14 | 12 | 76.82 | b2b4b5b7b12y4y7y10y12°<br>y12*y12y14   | 1597.84 | 93.436  | 90833 | 2 | 799.42  | 0.23   |
| P0A1H3 EFG_SALTY Elongation factor G        | 2  |                       | VYSGVVNSGDTVLSNVK                            | 337 | 17 | 13 | 89.28 | b2b4°b4b5b17y4y9y10y11<br>y12y14y15y17 | 1737.90 | 62.461  | 71112 | 2 | 869.45  | -0.84  |
| P0A1H3 EFG_SALTY Elongation factor G        | 3  |                       | SGPLAGYPVVDLGVR                              | 562 | 15 | 14 | 70.36 | b2b3b5°b5b6b7°b7y1y2y4y8y10y11y15      | 1499.82 | 76.633  | 66912 | 2 | 750.42  | 1.14   |
| P0A1H3 EFG_SALTY Elongation factor G        | 4  |                       | IGEVHDGAATMDWMEQEQR                          | 39  | 20 | 5  | 21.53 | b3b5b11y6y20                           | 2331.99 | 62.817  | 43417 | 3 | 778.00  | -2.30  |
| P0A1H3 EFG_SALTY Elongation factor G        | 5  |                       | YDDAPNNVAQAVIEAR                             | 686 | 16 | 5  | 16.33 | b12y8y12*y12y16                        | 1745.85 | 65.340  | 22366 | 2 | 873.43  | 4.06   |
| P0A1H3 EFG_SALTY Elongation factor G        | 6  |                       | GQYGHVVIDMYPLEPGSNPK                         | 512 | 20 | 6  | 26.8  | b2b11b12y6*y6y9                        | 2201.07 | 70.697  | 12201 | 3 | 734.36  | 0.22   |
| P0A1H3 EFG_SALTY Elongation factor G        | 7  |                       | AINWNDADQGVTFEYEDIPADMQLANEWHQNLIESAASEELMEK | 189 | 47 | 8  | 45.33 | b11y2y3y7y8y9y12y13                    | 5380.39 | 126.344 | 9273  | 4 | 1345.85 | 0.18   |
| P0A1H3 EFG_SALTY Elongation factor G        | 8  |                       | VVGQIK                                       | 153 | 6  | 1  | 13.24 | b4                                     | 643.41  | 45.744  | 19993 | 1 | 643.41  | -0.09  |
| P0A1H3 EFG_SALTY Elongation factor G        | 9  |                       | LGANPVPLQLAIGAEEGFTGVVDLVK                   | 161 | 26 | 3  | 11.72 | b6y4y14                                | 2607.43 | 120.235 | 19806 | 3 | 869.82  | -3.37  |

|                                              |    |                                          |                                       |     |    |    |       |                                    |         |         |        |   |         |        |
|----------------------------------------------|----|------------------------------------------|---------------------------------------|-----|----|----|-------|------------------------------------|---------|---------|--------|---|---------|--------|
| P0A1H3 EFG_SALTY Elongation factor G         | 10 |                                          | VEVETPEENTGDVIGDL SR                  | 618 | 19 | 7  | 27.85 | b3b13b15°b15y8y12*y12              | 2058.95 | 94.912  | 15366  | 3 | 686.99  | -16.13 |
| P0A1H3 EFG_SALTY Elongation factor G         | 11 |                                          | TTTTTER                               | 23  | 6  | 1  | 13.24 | y4                                 | 708.35  | 47.199  | 9594   | 1 | 708.35  | -6.72  |
| P0A1H3 EFG_SALTY Elongation factor G         | 12 |                                          | QSGGR                                 | 507 | 5  | 2  | 25.59 | b4y4                               | 504.26  | 35.155  | 7861   | 1 | 504.26  | 11.56  |
| P0A1H3 EFG_SALTY Elongation factor G         | 13 |                                          | NIGISAHIDAGK                          | 11  | 12 | 9  | 57.33 | b7b10°b10y3y7°y7y10y11°y11         | 1195.62 | 47.142  | 6700   | 2 | 598.32  | -16.34 |
| P0A1H3 EFG_SALTY Elongation factor G         | 14 |                                          | AGDIAAAIGLK                           | 378 | 11 | 3  | 26.28 | b3b4y3                             | 999.57  | 35.142  | 6440   | 2 | 500.29  | -18.32 |
| P0A1H3 EFG_SALTY Elongation factor G         | 15 |                                          | IHAEVPLSEMFYATQLR                     | 653 | 18 | 4  | 21.99 | b3b7b12°b12                        | 2062.04 | 91.494  | 3674   | 2 | 1031.52 | -3.55  |
| P0A1H3 EFG_SALTY Elongation factor G         | 16 |                                          | GITITSAATTAFWSGMAK                    | 59  | 18 | 3  | 14.83 | b9b12y7                            | 1813.92 | 88.022  | 2800   | 2 | 907.46  | 1.08   |
| P0A1H3 EFG_SALTY Elongation factor G         | 17 |                                          | QANK                                  | 128 | 4  | 1  | 12.35 | b3                                 | 460.25  | 20.730  | 1742   | 1 | 460.25  | -12.86 |
| P0A1H3 EFG_SALTY Elongation factor G         | 18 |                                          | ASYTMEFLK                             | 677 | 9  | 4  | 37.15 | y5°y5y6y7                          | 1089.53 | 110.240 | 1644   | 1 | 1089.53 | -2.69  |
| P0A1H3 EFG_SALTY Elongation factor G         | 19 |                                          | NIGISAHIDAGKTTTTTER                   | 11  | 18 | 4  | 14.83 | b14*b14b17y16                      | 1884.98 | 136.786 | 3071   | 1 | 1884.98 | 3.43   |
| P0A1H3 EFG_SALTY Elongation factor G         | 20 | Carbamidomethyl+C(10)<br>;Oxidation+M(7) | VLDGAVMVYCAVGGVQPQSETV<br>WR          | 104 | 24 | 8  | 31.12 | b4b16y6°y6y7°y7y12y21              | 2637.27 | 94.963  | 102341 | 3 | 879.76  | -3.33  |
| P0A1H3 EFG_SALTY Elongation factor G         | 21 |                                          | GQYGHVVID                             | 512 | 9  | 0  | 6.67  |                                    | 987.48  | 70.623  | 2713   | 2 | 494.24  | -14.03 |
| P60446 RL3_SALTY 50S ribosomal<br>protein L3 | 1  |                                          | VTVQSLDVVR                            | 169 | 10 | 9  | 66.2  | b9°y1y2y3y5y6y7y8y10               | 1115.63 | 56.914  | 169765 | 2 | 558.32  | -7.44  |
| P60446 RL3_SALTY 50S ribosomal<br>protein L3 | 2  |                                          | IFTEDGV SIPVTVIEVEANR                 | 13  | 20 | 8  | 60.23 | b2y2y3y4y5y6y7y20                  | 2188.16 | 88.185  | 125362 | 2 | 1094.58 | 5.91   |
| P60446 RL3_SALTY 50S ribosomal<br>protein L3 | 3  |                                          | VTQVKDLANDGYR                         | 33  | 13 | 6  | 30.93 | b4*b4y3y4°y4y7                     | 1478.74 | 40.830  | 27940  | 3 | 493.59  | -11.47 |
| P60446 RL3_SALTY 50S ribosomal<br>protein L3 | 4  | Carbamidomethyl+C(9)                     | GGVPGATGCDLIVKPAVK                    | 190 | 18 | 6  | 51.18 | y4y5y6y14y15y18                    | 1738.93 | 54.520  | 25499  | 3 | 580.32  | -11.65 |
| P60446 RL3_SALTY 50S ribosomal<br>protein L3 | 5  |                                          | AVQVTTGAK                             | 46  | 9  | 9  | 65.75 | b2y1y3y4y5y6y7*y7y9                | 874.49  | 22.465  | 16783  | 2 | 437.75  | -14.80 |
| P60446 RL3_SALTY 50S ribosomal<br>protein L3 | 6  |                                          | LAEGEETYVGQ SISVELFADV K              | 83  | 22 | 3  | 22.72 | b3b4b9                             | 2384.18 | 118.455 | 2194   | 4 | 596.80  | -1.84  |
| P60446 RL3_SALTY 50S ribosomal<br>protein L3 | 7  |                                          | VTKPEAGHFAK                           | 59  | 11 | 5  | 46.07 | y3y5y6y7°y7                        | 1184.62 | 26.286  | 39947  | 3 | 395.54  | -19.99 |
| P60446 RL3_SALTY 50S ribosomal<br>protein L3 | 8  |                                          | NLLLVK                                | 184 | 6  | 4  | 51.62 | b4y3y4y5                           | 699.48  | 57.240  | 38111  | 1 | 699.48  | -0.70  |
| P60446 RL3_SALTY 50S ribosomal<br>protein L3 | 9  |                                          | GLWEFR                                | 77  | 6  | 1  | 13.24 | y5                                 | 807.40  | 49.444  | 1929   | 1 | 807.40  | -15.12 |
| P60446 RL3_SALTY 50S ribosomal<br>protein L3 | 10 | Carbamidomethyl+C(9)                     | GGVPGATGCDLIVKPAVKA                   | 190 | 19 | 8  | 82.35 | y5y6y7y8y10y12y15y16               | 1809.97 | 56.611  | 146383 | 3 | 603.99  | -11.53 |
| P60446 RL3_SALTY 50S ribosomal<br>protein L3 | 11 |                                          | DLANDGYRAVQVTTGAK                     | 38  | 17 | 3  | 15.53 | b3b12y13                           | 1778.93 | 103.498 | 97299  | 2 | 889.97  | 13.93  |
| P60446 RL3_SALTY 50S ribosomal<br>protein L3 | 12 |                                          | AGVEAGRGLWEFR                         | 70  | 13 | 3  | 19.69 | b5b7y11                            | 1447.75 | 82.852  | 3418   | 2 | 724.38  | 6.75   |
| P60446 RL3_SALTY 50S ribosomal<br>protein L3 | 13 | Phosphoryl STY(14)                       | LAEGEETYVGQ SISVELFADV KK             | 83  | 23 | 5  | 28.08 | b4b9b12b13y10                      | 2592.26 | 117.626 | 21599  | 3 | 864.76  | 8.38   |
| P60446 RL3_SALTY 50S ribosomal<br>protein L3 | 14 | Phosphoryl STY(12)                       | IFTEDGV SIPVTVIEVEANR                 | 13  | 20 | 7  | 48.04 | b10°b10b11b12y12y13*y13<br>3       | 2268.14 | 78.745  | 3202   | 2 | 1134.57 | 14.21  |
| P60446 RL3_SALTY 50S ribosomal<br>protein L3 | 15 |                                          | QVTTGAK                               | 48  | 7  | 0  | 1.78  |                                    | 704.39  | 22.479  | 5321   | 1 | 704.39  | -11.96 |
| P25077 MDH_SALTY Malate<br>dehydrogenase     | 1  |                                          | NQLPSGSELSLYDIAPVTPGVAVD<br>LSHIPTAVK | 21  | 33 | 12 | 30.28 | b1b2*b2b3b13y1y3y5y15y<br>18y30y33 | 3388.80 | 93.912  | 84879  | 3 | 1130.27 | 0.65   |
| P25077 MDH_SALTY Malate<br>dehydrogenase     | 2  |                                          | VAVLGAAGGIGQALALLK                    | 2   | 19 | 8  | 57.3  | b3y3y4y5y9y11y12y19                | 1735.09 | 120.182 | 57741  | 2 | 868.05  | 2.25   |

|                                                 |    |                    |                                        |     |    |    |        |                                                                      |         |         |       |   |         |        |
|-------------------------------------------------|----|--------------------|----------------------------------------|-----|----|----|--------|----------------------------------------------------------------------|---------|---------|-------|---|---------|--------|
| P25077 MDH_SALTY Malate dehydrogenase           | 3  |                    | FFSQPLLLGK                             | 262 | 10 | 5  | 25.84  | b2b6y2y4y6                                                           | 1149.66 | 76.044  | 43672 | 2 | 575.33  | -8.49  |
| P25077 MDH_SALTY Malate dehydrogenase           | 4  |                    | IQNAGTEVV EAK                          | 205 | 12 | 25 | 128.05 | b2b3*b3b6°b6°b6b8*b8b10°b10y1y2y3°y3y4°y4y8°y8y9°y9y10*y10y11°y11y12 | 1258.66 | 35.184  | 35556 | 2 | 629.83  | -2.42  |
| P25077 MDH_SALTY Malate dehydrogenase           | 5  |                    | AGGGSATLSMGQAAAR                       | 217 | 16 | 6  | 41.6   | b1y7y8y10y11y16                                                      | 1405.68 | 40.620  | 33996 | 2 | 703.35  | -1.39  |
| P25077 MDH_SALTY Malate dehydrogenase           | 6  |                    | SIGTSAFEQHS LDAMLDTLKK                 | 279 | 22 | 4  | 17.16  | b11b13y12y14                                                         | 2405.22 | 85.711  | 17853 | 3 | 802.41  | -5.48  |
| P25077 MDH_SALTY Malate dehydrogenase           | 7  |                    | DIQLGEDFINK                            | 301 | 11 | 3  | 26.28  | b3y8y9                                                               | 1291.64 | 68.048  | 2976  | 1 | 1291.64 | -9.55  |
| P25077 MDH_SALTY Malate dehydrogenase           | 8  |                    | IQNAGTEVV EAKAGGGSATLSMGQAAAR          | 205 | 28 | 7  | 38.23  | b4b9*b9b10b17y7y8                                                    | 2645.35 | 96.882  | 2230  | 4 | 662.09  | 8.68   |
| Q8ZPD6 YNCE_SALTY Uncharacterized protein yncE  | 1  |                    | TFDTP TYPNSLALSADGK                    | 308 | 18 | 9  | 51.71  | b3b4b12y2y5y8y11y14y18                                               | 1897.93 | 65.752  | 29742 | 2 | 949.47  | 3.86   |
| Q8ZPD6 YNCE_SALTY Uncharacterized protein yncE  | 2  |                    | LYT TNADGEFITIDTASNK                   | 198 | 19 | 6  | 38.32  | b1b5b6b7b10y7                                                        | 2073.98 | 118.688 | 4587  | 3 | 692.00  | -7.65  |
| Q8ZPD6 YNCE_SALTY Uncharacterized protein yncE  | 3  |                    | AFITDSK                                | 244 | 7  | 8  | 39.27  | b1b2b3b7y3y6°y6y7                                                    | 781.40  | 35.149  | 3928  | 2 | 391.20  | -14.53 |
| Q8ZPD6 YNCE_SALTY Uncharacterized protein yncE  | 4  |                    | ESAIWVVDGETIK                          | 162 | 13 | 5  | 27.17  | b2b4°b4b5b12                                                         | 1446.74 | 81.682  | 2505  | 3 | 482.92  | -4.39  |
| Q8ZPD6 YNCE_SALTY Uncharacterized protein yncE  | 5  |                    | ELVADAATNTIYISGVGK                     | 144 | 18 | 4  | 23.75  | b11b13*b13b14                                                        | 1821.94 | 73.066  | 33326 | 3 | 607.98  | -11.32 |
| Q8ZPD6 YNCE_SALTY Uncharacterized protein yncE  | 6  |                    | IAAPASLAVLFNPTR                        | 268 | 15 | 5  | 23.29  | b6y4*y4y5°y5                                                         | 1540.86 | 90.048  | 12001 | 2 | 770.93  | -16.87 |
| Q8ZPD6 YNCE_SALTY Uncharacterized protein yncE  | 7  |                    | IAAPASLAVLFNPTRNEAYVTHR                | 268 | 23 | 4  | 22.83  | b4y11y12y20                                                          | 2511.31 | 82.706  | 48446 | 4 | 628.58  | -13.90 |
| Q8ZPD6 YNCE_SALTY Uncharacterized protein yncE  | 8  |                    | NEAYVTHRQAGQVSVIDAK                    | 283 | 19 | 3  | 14.23  | b8y3y12                                                              | 2086.09 | 64.786  | 18653 | 3 | 696.03  | 9.13   |
| Q8ZPD6 YNCE_SALTY Uncharacterized protein yncE  | 9  |                    | AQRLYTTNADGEFITIDTASNK                 | 195 | 22 | 6  | 12.85  | b7°b7b15°b15y4°y4                                                    | 2429.21 | 89.156  | 6347  | 3 | 810.41  | 7.24   |
| Q8ZPD6 YNCE_SALTY Uncharacterized protein yncE  | 10 |                    | EQEATQPPDDVIRIAL                       | 338 | 15 | 3  | 25.35  | b4b11b12                                                             | 1697.86 | 78.781  | 2935  | 2 | 849.43  | -5.68  |
| Q8ZPD6 YNCE_SALTY Uncharacterized protein yncE  | 11 | Phosphoryl STY(14) | ELVADAATNTIYISGVGK                     | 144 | 18 | 5  | 29.38  | b5b7y3y6y10                                                          | 1901.92 | 56.936  | 15277 | 3 | 634.65  | 2.44   |
| P0A2M5 UPP_SALTY Uracil phohoribosyltransferase | 1  |                    | AGLGMMEGVLENVPSAR                      | 78  | 17 | 6  | 34.5   | b13y4y6y7y12y17                                                      | 1730.86 | 81.954  | 73229 | 2 | 865.94  | 4.23   |
| P0A2M5 UPP_SALTY Uracil phohoribosyltransferase | 2  |                    | VLVLVAAPEGIAALEK                       | 155 | 16 | 7  | 56.1   | b2b3b4b5b6y9y11                                                      | 1592.96 | 85.959  | 39411 | 2 | 796.99  | 1.00   |
| P0A2M5 UPP_SALTY Uracil phohoribosyltransferase | 3  |                    | NEETLEPVVPYFQK                         | 103 | 13 | 5  | 27.17  | b2y5y7y8y13                                                          | 1593.78 | 65.691  | 16659 | 2 | 797.40  | 2.68   |
| P0A2M5 UPP_SALTY Uracil phohoribosyltransferase | 4  |                    | ITVVPILR                               | 70  | 8  | 4  | 39.72  | y2y4y5y6                                                             | 910.60  | 70.191  | 15589 | 2 | 455.80  | -7.57  |
| P0A2M5 UPP_SALTY Uracil phohoribosyltransferase | 5  |                    | LVS NIDER                              | 116 | 8  | 3  | 39.72  | y3y6y7                                                               | 945.49  | 33.467  | 34576 | 2 | 473.25  | -8.13  |
| P0A2M5 UPP_SALTY Uracil phohoribosyltransferase | 6  |                    | ELASEVGSLLTYEATADLETEK                 | 29  | 22 | 7  | 47     | b3b8b9b10b13y5y12                                                    | 2369.14 | 136.372 | 1886  | 2 | 1185.07 | -9.17  |
| P0A2M5 UPP_SALTY Uracil phohoribosyltransferase | 7  |                    | AHPDVELY TASIDQGLNEHGYIIPGLGDAGDKIFGTK | 171 | 37 | 3  | 10.89  | b5b10y15                                                             | 3911.92 | 89.778  | 25183 | 4 | 978.73  | -6.99  |
| P0A2M5 UPP_SALTY Uracil phohoribosyltransferase | 8  |                    | LGLMRENDISTK                           | 14  | 12 | 4  | 32.83  | b6b8b9y7                                                             | 1376.73 | 33.607  | 2049  | 3 | 459.58  | 9.40   |
| P0A2M5 UPP_SALTY Uracil phohoribosyltransferase | 9  | Oxidation+M()      | AGLGMMEGVLENVPSAR                      | 78  | 17 | 4  | 15.53  | b12*b12b16y6                                                         | 1746.86 | 94.981  | 18058 | 2 | 873.93  | 2.59   |
| P26976 PHON_SALTY Non-ecific acid phohatase     | 1  |                    | LQTIPAFQK                              | 215 | 9  | 7  | 55.97  | y3y5*y5y7y8*y8y9                                                     | 1045.60 | 55.603  | 99009 | 2 | 523.30  | -6.65  |
| P26976 PHON_SALTY Non-ecific acid phohatase     | 2  |                    | YVGAVEFAR                              | 206 | 9  | 5  | 51.71  | b5y3y5y7y9                                                           | 1011.52 | 52.074  | 74122 | 2 | 506.26  | -8.63  |

|                                             |    |                       |                                    |     |    |    |       |                                 |         |         |        |   |         |        |
|---------------------------------------------|----|-----------------------|------------------------------------|-----|----|----|-------|---------------------------------|---------|---------|--------|---|---------|--------|
| P26976 PHON_SALTY Non-ecific acid phohatase | 3  |                       | NLLTMGGYYATASAKK                   | 108 | 16 | 3  | 16.33 | b12y8y12                        | 1688.85 | 64.847  | 22378  | 3 | 563.62  | -11.93 |
| P26976 PHON_SALTY Non-ecific acid phohatase | 4  |                       | NLLTMGGYYATASAK                    | 108 | 15 | 8  | 36.54 | b1b10b11°b11*b11y12y13°y13      | 1560.77 | 90.289  | 19154  | 2 | 780.89  | -3.99  |
| P26976 PHON_SALTY Non-ecific acid phohatase | 5  |                       | NGSYPSGHTAYGTLLALVLSEARPER         | 150 | 26 | 5  | 11.72 | b1b2b5b22y6                     | 2759.37 | 96.771  | 18172  | 4 | 690.60  | -13.18 |
| P26976 PHON_SALTY Non-ecific acid phohatase | 6  | Carbamidomethyl+C(3)  | VICGAHWQSDVDAGR                    | 191 | 15 | 8  | 53.43 | b3y2y3y5y8°y8y9y13              | 1670.79 | 47.009  | 7189   | 2 | 835.90  | 12.93  |
| P26976 PHON_SALTY Non-ecific acid phohatase | 7  |                       | IFSPVVGAK                          | 85  | 9  | 7  | 78.55 | y3y4y5y6y7y8°y8                 | 917.53  | 51.735  | 110140 | 2 | 459.27  | -15.96 |
| P26976 PHON_SALTY Non-ecific acid phohatase | 8  |                       | QAAEDADVSVENIAR                    | 70  | 15 | 4  | 39.39 | y8y11y12y13                     | 1587.77 | 51.067  | 18204  | 2 | 794.39  | 3.08   |
| P26976 PHON_SALTY Non-ecific acid phohatase | 9  | Carbamidomethyl+C(12) | TRPFVLFNHSTCRPEDENTLR              | 128 | 21 | 7  | 34.77 | b12*b12b13y7°y7*y7y8            | 2589.26 | 92.688  | 14116  | 3 | 863.76  | -1.51  |
| P26976 PHON_SALTY Non-ecific acid phohatase | 10 |                       | DTPETWNMLKNLLTMGGYYATASAK          | 98  | 25 | 4  | 22.42 | b11b12°b12b14                   | 2776.31 | 136.641 | 10523  | 2 | 1388.66 | -8.88  |
| P26976 PHON_SALTY Non-ecific acid phohatase | 11 |                       | EDHPKLNy                           | 242 | 8  | 3  | 31.94 | b5b6y5                          | 1015.50 | 61.774  | 2602   | 1 | 1015.50 | 11.48  |
| P26976 PHON_SALTY Non-ecific acid phohatase | 12 |                       | EAYFKGYAIK                         | 54  | 10 | 5  | 27.6  | b4°b4b5°b5y9                    | 1189.61 | 32.343  | 1917   | 3 | 397.21  | -9.85  |
| P26976 PHON_SALTY Non-ecific acid phohatase | 13 | Oxidation+M(5)        | NLLTMGGYYATASAK                    | 108 | 15 | 5  | 42.98 | b5b10b12b14y9                   | 1576.78 | 81.666  | 4520   | 3 | 526.26  | 7.35   |
| P26976 PHON_SALTY Non-ecific acid phohatase | 14 |                       | GAVEFAR                            | 208 | 7  | 0  | 1.78  |                                 | 749.39  | 52.112  | 4691   | 1 | 749.39  | -0.57  |
| P26976 PHON_SALTY Non-ecific acid phohatase | 15 |                       | TIPAFQK                            | 217 | 7  | 2  | 8.55  | b6°b6                           | 804.45  | 55.611  | 2437   | 1 | 804.45  | -11.61 |
| O54296 RS11_SALTY 30S ribosomal protein S11 | 1  |                       | STPFAAQVAAER                       | 57  | 12 | 9  | 61.31 | b1b2b3°b3b4y6y7y8y10            | 1247.65 | 50.284  | 110575 | 2 | 624.33  | 9.78   |
| O54296 RS11_SALTY 30S ribosomal protein S11 | 2  |                       | QGNALGWATAGGSGFR                   | 37  | 16 | 9  | 63.25 | b5b16y6y7y8y11y12y14y16         | 1549.75 | 66.356  | 63425  | 2 | 775.38  | 2.28   |
| O54296 RS11_SALTY 30S ribosomal protein S11 | 3  |                       | ALNAAGFR                           | 98  | 8  | 6  | 47.74 | b5y4y5y6°*y6y8                  | 819.44  | 42.834  | 46883  | 2 | 410.22  | -9.24  |
| O54296 RS11_SALTY 30S ribosomal protein S11 | 4  |                       | ESTIR                              | 93  | 5  | 2  | 25.59 | b3b4                            | 605.33  | 35.163  | 9056   | 1 | 605.33  | 8.77   |
| O54296 RS11_SALTY 30S ribosomal protein S11 | 5  | Carbamidomethyl+C(15) | ITNITDVTPIPHNGCRPPK                | 106 | 19 | 5  | 30.07 | b3b8y6y7y13                     | 2130.09 | 117.393 | 4056   | 2 | 1065.55 | -11.23 |
| O54296 RS11_SALTY 30S ribosomal protein S11 | 6  |                       | QGNALGWATAGGSGFRGSR                | 37  | 19 | 8  | 51.99 | b6b9b10b11°b11b12°*b12y8        | 1849.92 | 61.914  | 17501  | 3 | 617.31  | 7.59   |
| O54296 RS11_SALTY 30S ribosomal protein S11 | 7  | Phosphoryl STY(12)    | QVSDGVAHIHASFNNTIVTITDR            | 14  | 23 | 6  | 28.08 | b3b8b9b11°b11y12                | 2575.23 | 111.666 | 5682   | 3 | 859.08  | 3.51   |
| P0A1Z2 SKP_SALTY Chaperone protein skp      | 1  |                       | TGVSNTLENEFK                       | 39  | 12 | 8  | 43.5  | y2y5°y5y7y9y10°y10y12           | 1338.66 | 58.458  | 89155  | 2 | 669.83  | 1.55   |
| P0A1Z2 SKP_SALTY Chaperone protein skp      | 2  |                       | IAIVNMGNLFFQVQAQK                  | 23  | 16 | 13 | 62.74 | b2b3b4b11b15y1y2y3y6°y6y7y12y16 | 1773.97 | 89.994  | 74442  | 2 | 887.49  | 1.58   |
| P0A1Z2 SKP_SALTY Chaperone protein skp      | 3  |                       | VANDQSIDLVVDANTVAYNSSDV K DITADVLK | 126 | 32 | 5  | 15.26 | b7b9°b9b18y3                    | 3392.70 | 89.912  | 47863  | 3 | 1131.57 | -0.79  |
| P0A1Z2 SKP_SALTY Chaperone protein skp      | 4  |                       | DVMSQR                             | 85  | 6  | 1  | 13.24 | b3                              | 735.35  | 25.320  | 2497   | 1 | 735.35  | 10.38  |
| P0A1Z2 SKP_SALTY Chaperone protein skp      | 5  |                       | AQAFEK                             | 97  | 6  | 1  | 13.24 | y5                              | 693.35  | 28.282  | 2181   | 2 | 347.18  | -11.88 |
| P0A1Z2 SKP_SALTY Chaperone protein skp      | 6  |                       | TGVSNTLENEFKGR                     | 39  | 14 | 4  | 23.81 | b13y10°y10y11                   | 1551.76 | 68.431  | 16119  | 2 | 776.39  | -8.42  |
| P0A1Z2 SKP_SALTY Chaperone protein skp      | 7  |                       | KVANDQSIDLVVDANTVAYNSSDVK          | 125 | 25 | 4  | 24.96 | b7b8y8y13                       | 2665.32 | 108.799 | 5245   | 3 | 889.11  | -4.03  |
| P0A1Z2 SKP_SALTY Chaperone protein skp      | 8  | Oxidation+M(11)       | WLLAAGLGLAMVTSAQAADK               | 3   | 20 | 5  | 24.16 | b14y3y6°y6y7                    | 2003.07 | 81.592  | 5358   | 2 | 1002.04 | 3.05   |
| P0A1Z2 SKP_SALTY Chaperone protein skp      | 9  | Oxidation+M(6)        | LEKDVMSQR                          | 82  | 9  | 5  | 43.93 | b4b5b8°b8y8                     | 1121.57 | 115.783 | 1616   | 2 | 561.29  | 6.64   |

|                                                      |    |                      |                                     |     |    |    |       |                                    |         |         |       |   |         |        |
|------------------------------------------------------|----|----------------------|-------------------------------------|-----|----|----|-------|------------------------------------|---------|---------|-------|---|---------|--------|
| P0A2F6 SSB_SALTY Single-stranded DNA-binding protein | 1  |                      | LAEVAGEYLR                          | 63  | 10 | 6  | 35.84 | b2b10y6y7y8y10                     | 1120.59 | 55.040  | 48303 | 2 | 560.80  | -7.73  |
| P0A2F6 SSB_SALTY Single-stranded DNA-binding protein | 2  |                      | VILVGNLGQDPEVR                      | 8   | 14 | 6  | 37.4  | y2y4y8y11y12y14                    | 1508.85 | 66.079  | 35956 | 2 | 754.93  | 2.02   |
| P0A2F6 SSB_SALTY Single-stranded DNA-binding protein | 3  |                      | YTTEINVPIGGVMQMLGGR                 | 97  | 20 | 14 | 86.96 | b2b3b4b5b7*b7b10b12y4y5y7y10y14y20 | 2164.11 | 96.724  | 33930 | 2 | 1082.56 | 7.56   |
| P0A2F6 SSB_SALTY Single-stranded DNA-binding protein | 4  |                      | YMPSGGAVANLTLATSESWR                | 22  | 20 | 3  | 12.67 | b16*y6y17                          | 2111.01 | 72.142  | 8237  | 3 | 704.34  | -6.71  |
| P0A2F6 SSB_SALTY Single-stranded DNA-binding protein | 5  |                      | VVMFGK                              | 57  | 6  | 3  | 38.83 | y3y4y5                             | 680.38  | 46.127  | 8433  | 1 | 680.38  | -4.58  |
| P0A2F6 SSB_SALTY Single-stranded DNA-binding protein | 6  |                      | GSQVYIEGQLR                         | 74  | 11 | 4  | 23.27 | b8b10y8*y8                         | 1249.64 | 56.067  | 4887  | 2 | 625.32  | -13.87 |
| P0A2F6 SSB_SALTY Single-stranded DNA-binding protein | 7  |                      | YMPSGGAVANLTLATSESWRDK              | 22  | 22 | 3  | 12.85 | b13b15y6                           | 2354.15 | 113.651 | 6735  | 3 | 785.39  | 3.73   |
| P0A2F6 SSB_SALTY Single-stranded DNA-binding protein | 8  |                      | KWTDQSGQER                          | 87  | 10 | 5  | 25.84 | b8y3*y3y5*y5                       | 1234.58 | 118.552 | 2273  | 1 | 1234.58 | -0.59  |
| P0A2F6 SSB_SALTY Single-stranded DNA-binding protein | 9  | Oxidation+M(16)      | YTTEINVPIGGVMQMLGGR                 | 97  | 20 | 7  | 36.94 | b5b6b14y5y12*y12y16                | 2180.07 | 86.283  | 4603  | 2 | 1090.54 | -7.06  |
| P0A2F6 SSB_SALTY Single-stranded DNA-binding protein | 10 |                      | SGGAVANLTLATSESWR                   | 25  | 17 | 1  | 7.71  | b10                                | 1719.89 | 72.213  | 14176 | 2 | 860.45  | 13.70  |
| P55900 SERC_SALTY Phohoserine aminotransferase       | 1  |                      | AQVFNFSSGPAMLP AEVLK                | 1   | 19 | 11 | 47.64 | b2*b2b6b12*b12b13y3y6y13y14y19     | 2006.05 | 91.506  | 60254 | 2 | 1003.53 | 4.99   |
| P55900 SERC_SALTY Phohoserine aminotransferase       | 2  |                      | MNVPFQLADNTLDK                      | 297 | 14 | 4  | 15.12 | y4y11*y11y14                       | 1605.81 | 55.725  | 12767 | 3 | 535.94  | 10.26  |
| P55900 SERC_SALTY Phohoserine aminotransferase       | 3  | Carbamidomethyl+C(7) | LAQQELCDWHGLGTSVMEISHR              | 20  | 22 | 4  | 19.86 | b7b10b13y5                         | 2567.19 | 119.339 | 7930  | 3 | 856.40  | -8.84  |
| P55900 SERC_SALTY Phohoserine aminotransferase       | 4  |                      | ALTDFMIDFERR                        | 348 | 12 | 5  | 25.26 | b1b8b9y10y12                       | 1513.76 | 73.048  | 6165  | 2 | 757.39  | 11.05  |
| P55900 SERC_SALTY Phohoserine aminotransferase       | 5  |                      | AQGGVAAMHK                          | 257 | 10 | 3  | 25.84 | b3b5y8                             | 969.49  | 19.365  | 5878  | 2 | 485.25  | -4.72  |
| P55900 SERC_SALTY Phohoserine aminotransferase       | 6  |                      | ITVDGK                              | 122 | 6  | 2  | 13.24 | b5*b5                              | 632.36  | 29.005  | 11221 | 1 | 632.36  | -5.50  |
| P55900 SERC_SALTY Phohoserine aminotransferase       | 7  |                      | MAQVFNFSSGPAMLP AEVLK               | 0   | 20 | 6  | 21.53 | b3b8*b8b10y13*y13                  | 2137.10 | 90.203  | 9000  | 2 | 1069.05 | 9.37   |
| P55900 SERC_SALTY Phohoserine aminotransferase       | 8  |                      | ASIYNAMPIEGVK                       | 335 | 13 | 4  | 34.16 | b3*b3b4b5                          | 1392.75 | 76.338  | 6035  | 2 | 696.88  | 21.21  |
| P55900 SERC_SALTY Phohoserine aminotransferase       | 9  |                      | YGVIIYAGAQK                         | 188 | 10 | 6  | 50.63 | b3b9*b9y6y8y9                      | 1069.56 | 44.026  | 4053  | 1 | 1069.56 | -5.48  |
| P55900 SERC_SALTY Phohoserine aminotransferase       | 10 |                      | TTADYVDAGYWAASAIK                   | 91  | 17 | 3  | 22.52 | b11y10y11                          | 1802.84 | 40.852  | 2841  | 3 | 601.62  | -9.07  |
| P55900 SERC_SALTY Phohoserine aminotransferase       | 11 |                      | EFIQVAEEAEQDFR                      | 44  | 14 | 6  | 38.06 | b8b13*b13y3y7y13                   | 1710.83 | 87.853  | 2169  | 2 | 855.92  | 21.55  |
| P55900 SERC_SALTY Phohoserine aminotransferase       | 12 |                      | GQFAGVPLNLLGDKTTADYVDA<br>GYWAASAIK | 77  | 31 | 4  | 13.2  | b5b25y10y25                        | 3212.64 | 97.751  | 38934 | 3 | 1071.55 | 5.09   |
| P55900 SERC_SALTY Phohoserine aminotransferase       | 13 |                      | GKEFIQVAEEAEQDFR                    | 42  | 16 | 4  | 29.54 | b10b13y6y7                         | 1895.93 | 53.026  | 3290  | 3 | 632.65  | 8.89   |
| P55900 SERC_SALTY Phohoserine aminotransferase       | 14 |                      | INQQKAELLYGVINDSDFYR                | 267 | 20 | 5  | 39.91 | b4b19y3y4y5                        | 2386.21 | 86.663  | 2584  | 2 | 1193.61 | 1.33   |
| P55900 SERC_SALTY Phohoserine aminotransferase       | 15 |                      | MNVPFQLADNTLDK                      | 297 | 14 | 0  | 4     |                                    | 1588.76 | 55.820  | 6332  | 2 | 794.88  | -4.99  |
| P0A1V4 KAD_SALTY Adenylate kinase                    | 1  |                      | LVEYHQMTAPLIGYYQK                   | 167 | 17 | 9  | 50.09 | b6b7b9b11y4y8y12*y12y17            | 2054.03 | 69.626  | 53132 | 3 | 685.35  | -5.35  |
| P0A1V4 KAD_SALTY Adenylate kinase                    | 2  |                      | YGIPQISTGDMLR                       | 23  | 13 | 6  | 41.3  | b3b12y3y8y10y13                    | 1450.73 | 72.889  | 50121 | 2 | 725.87  | -0.93  |
| P0A1V4 KAD_SALTY Adenylate kinase                    | 3  |                      | VDGTQAVADVRR                        | 195 | 11 | 6  | 35.27 | b4y2y4y9y10y11                     | 1130.57 | 37.215  | 48056 | 2 | 565.79  | -5.07  |
| P0A1V4 KAD_SALTY Adenylate kinase                    | 4  |                      | NGFLLDGFPR                          | 78  | 10 | 5  | 27.6  | b2b3y4y5y10                        | 1135.58 | 81.085  | 38357 | 2 | 568.29  | -6.45  |

|                                                            |    |                       |                                   |     |    |    |       |                                   |         |         |         |   |         |        |
|------------------------------------------------------------|----|-----------------------|-----------------------------------|-----|----|----|-------|-----------------------------------|---------|---------|---------|---|---------|--------|
| P0A1V4 KAD_SALTY Adenylate kinase                          | 5  |                       | IILLGAPGAGK                       | 2   | 11 | 5  | 40.04 | b2b3y3y5y7                        | 1009.63 | 61.448  | 27667   | 2 | 505.32  | -10.04 |
| P0A1V4 KAD_SALTY Adenylate kinase                          | 6  |                       | VEGKDDVTGEDLTTR                   | 141 | 15 | 4  | 33.8  | b1y9y10y11                        | 1634.79 | 50.181  | 3278    | 3 | 545.60  | 1.79   |
| P0A1V4 KAD_SALTY Adenylate kinase                          | 7  |                       | GTQAQFIMEK                        | 13  | 10 | 3  | 40.61 | y3y5y7                            | 1152.58 | 49.307  | 2101    | 1 | 1152.58 | 8.90   |
| P0A1V4 KAD_SALTY Adenylate kinase                          | 8  |                       | TIPQADAMK                         | 88  | 9  | 4  | 43.93 | b4b6b7y3                          | 974.48  | 87.915  | 1734    | 1 | 974.48  | -18.41 |
| P0A1V4 KAD_SALTY Adenylate kinase                          | 9  | Carbamidomethyl+C(6)  | IAQEDCRNGFLLDGFPR                 | 71  | 17 | 3  | 15.53 | b12y5y14                          | 2007.97 | 88.779  | 38724   | 2 | 1004.49 | 2.01   |
| P0A1V4 KAD_SALTY Adenylate kinase                          | 10 |                       | IILLGAPGAGKGTQAQFIMEK             | 2   | 21 | 3  | 13.25 | b3y17y19                          | 2143.18 | 72.908  | 36193   | 3 | 715.06  | -7.29  |
| P0A1V4 KAD_SALTY Adenylate kinase                          | 11 |                       | VDGTQAVADVRAALEK                  | 195 | 16 | 3  | 16.33 | b4b11y13                          | 1642.87 | 80.461  | 20098   | 2 | 821.94  | -6.24  |
| P0A1V4 KAD_SALTY Adenylate kinase                          | 12 |                       | NGFLLDGFPR TIPQADAMK              | 78  | 19 | 3  | 14.23 | b11y6y9                           | 2091.05 | 91.623  | 5443    | 3 | 697.69  | -10.74 |
| P0A1V4 KAD_SALTY Adenylate kinase                          | 13 |                       | GTQAQFIMEKYGIPQISTGDMLR           | 13  | 23 | 3  | 12.5  | b8b11y10                          | 2584.32 | 109.357 | 2388    | 3 | 862.11  | 11.81  |
| P0A1V4 KAD_SALTY Adenylate kinase                          | 14 |                       | KDDQEETVR                         | 156 | 9  | 4  | 37.15 | y3y6*y6y7                         | 1119.54 | 136.357 | 2160    | 1 | 1119.54 | 13.74  |
| P0A1V4 KAD_SALTY Adenylate kinase                          | 15 |                       | RLVEYHQMTAPLIGYYQK                | 166 | 18 | 5  | 33.75 | y3*y3y4y5*y5                      | 2210.13 | 72.035  | 1646    | 2 | 1105.57 | -7.18  |
| P14845 CARA_SALTY Carbamoyl-phosphate synthase small chain | 1  | Carbamidomethyl+C(12) | FLETDIPLFGICLGHQLLALASGAK         | 257 | 25 | 13 | 55.8  | b2b3b6*b6b12y2y6y7y16y19y22y23y25 | 2684.45 | 128.579 | 104580  | 3 | 895.49  | -1.09  |
| P14845 CARA_SALTY Carbamoyl-phosphate synthase small chain | 2  |                       | LTVVPAQTSAEVLK                    | 215 | 15 | 6  | 25.35 | y1y2y4y8y11y15                    | 1584.89 | 63.636  | 42334   | 2 | 792.95  | 0.62   |
| P14845 CARA_SALTY Carbamoyl-phosphate synthase small chain | 3  |                       | AFPGLNGMDLAK                      | 148 | 12 | 9  | 48.27 | b1y7*y7y8y9y10*y10y12*y12         | 1233.63 | 72.095  | 25196   | 2 | 617.32  | -2.87  |
| P14845 CARA_SALTY Carbamoyl-phosphate synthase small chain | 4  |                       | SALLVLEDGTQFHGR                   | 3   | 15 | 6  | 28.14 | b7y5y7y8*y8y15                    | 1642.87 | 125.431 | 22564   | 2 | 821.94  | 6.54   |
| P14845 CARA_SALTY Carbamoyl-phosphate synthase small chain | 5  |                       | DLPLIASNFR                        | 83  | 10 | 4  | 35.84 | b2y4y5y6                          | 1145.62 | 76.072  | 21684   | 2 | 573.31  | -10.34 |
| P14845 CARA_SALTY Carbamoyl-phosphate synthase small chain | 6  |                       | EVTTAETYR                         | 160 | 9  | 8  | 55.97 | y2y4*y4y5*y5y7y8y9                | 1069.51 | 29.128  | 11312   | 2 | 535.26  | -5.25  |
| P14845 CARA_SALTY Carbamoyl-phosphate synthase small chain | 7  | Carbamidomethyl+C(6)  | GAQNGCIIAGDSPDAK                  | 125 | 16 | 7  | 33.09 | b5b10b13*b13y11y13y16             | 1573.73 | 38.714  | 9707    | 2 | 787.37  | 4.03   |
| P14845 CARA_SALTY Carbamoyl-phosphate synthase small chain | 8  | Carbamidomethyl+C(18) | MNPDGIFLSNGPGDPAPCDYAITA IQK      | 230 | 27 | 5  | 11.52 | b9*b9b14y13*y13                   | 2862.38 | 77.272  | 8232    | 3 | 954.80  | 11.17  |
| P14845 CARA_SALTY Carbamoyl-phosphate synthase small chain | 9  |                       | NVVMITAQNHGFAVDEDSL PANL R        | 302 | 24 | 5  | 22.5  | b1b10y10y12y13                    | 2611.28 | 82.776  | 7689    | 3 | 871.10  | -4.21  |
| P14845 CARA_SALTY Carbamoyl-phosphate synthase small chain | 10 |                       | SEDDLPHFVVAYDFGAK                 | 185 | 17 | 5  | 32.36 | b3b9b10y3y10                      | 1909.87 | 47.185  | 3712    | 3 | 637.29  | -14.70 |
| P14845 CARA_SALTY Carbamoyl-phosphate synthase small chain | 11 |                       | MLVDR                             | 207 | 5  | 1  | 12.79 | b3                                | 633.33  | 118.660 | 2390    | 1 | 633.33  | -13.97 |
| P14845 CARA_SALTY Carbamoyl-phosphate synthase small chain | 12 |                       | AIGATGSAGVEVVNTSMTGYQEI LTDPSSYSR | 18  | 32 | 8  | 27.38 | b10*b10b11b14y4y7*y7y14           | 3321.56 | 110.114 | 1696    | 3 | 1107.86 | -9.63  |
| P14845 CARA_SALTY Carbamoyl-phosphate synthase small chain | 13 |                       | MKFGHHGGNHPVK                     | 285 | 13 | 4  | 37.92 | b12y10y11y12                      | 1445.72 | 59.023  | 1192810 | 3 | 482.58  | 0.51   |
| P14845 CARA_SALTY Carbamoyl-phosphate synthase small chain | 14 | Carbamidomethyl+C(8)  | EKGAQNGCIIAGDSPDAK                | 123 | 18 | 4  | 40.43 | b5b6b16b17                        | 1830.89 | 93.710  | 11824   | 2 | 915.95  | 12.53  |
| P14845 CARA_SALTY Carbamoyl-phosphate synthase small chain | 15 |                       | DGLPEAKSEDDLPHFVVAYDFGA K         | 178 | 24 | 6  | 26.23 | b12b16b17*b17y14y16               | 2620.29 | 136.759 | 7109    | 2 | 1310.65 | 13.88  |
| P14845 CARA_SALTY Carbamoyl-phosphate synthase small chain | 16 |                       | NVVMITAQNHGFAVDEDSL PANL RVTHK    | 302 | 28 | 3  | 22.38 | b4b8b9                            | 3076.61 | 82.529  | 3099    | 6 | 513.61  | 14.13  |
| P14845 CARA_SALTY Carbamoyl-phosphate synthase small chain | 17 | Oxidation+M(8)        | AFPGLNGMDLAK                      | 148 | 12 | 4  | 30.77 | b6b10y5y7                         | 1249.63 | 36.065  | 23361   | 3 | 417.22  | 8.01   |
| P14845 CARA_SALTY Carbamoyl-phosphate synthase small chain | 18 |                       | NVVMITAQNHGFAVDEDSL PANL R        | 302 | 24 | 0  | 8.45  |                                   | 2594.23 | 82.865  | 8677    | 2 | 1297.62 | -13.08 |

|                                                                     |    |                    |                                 |     |    |    |       |                                    |         |         |       |   |         |        |
|---------------------------------------------------------------------|----|--------------------|---------------------------------|-----|----|----|-------|------------------------------------|---------|---------|-------|---|---------|--------|
| P14146 PHOP_SALTY Virulence transcriptional regulatory protein phoP | 1  |                    | SSDVSLPVLVLTAR                  | 68  | 14 | 7  | 54.97 | y1y3y4y8y9y10y14                   | 1456.84 | 86.729  | 84992 | 2 | 728.92  | 0.34   |
| P14146 PHOP_SALTY Virulence transcriptional regulatory protein phoP | 2  |                    | IQAQYPHDVITTVR                  | 201 | 14 | 6  | 40.65 | b2b10y7y9y10y12                    | 1640.85 | 52.176  | 69714 | 3 | 547.62  | -14.51 |
| P14146 PHOP_SALTY Virulence transcriptional regulatory protein phoP | 3  |                    | VLVVEDNALLR                     | 3   | 11 | 8  | 54.09 | b2b3y6y7*y7y8*y8y9                 | 1240.71 | 67.772  | 52303 | 2 | 620.86  | -9.64  |
| P14146 PHOP_SALTY Virulence transcriptional regulatory protein phoP | 4  |                    | VQLQDSGHQVDAEDAR                | 18  | 17 | 8  | 32.36 | b1b8b9b15y2y3y15°y15               | 1838.84 | 36.892  | 19150 | 3 | 613.62  | -12.55 |
| P14146 PHOP_SALTY Virulence transcriptional regulatory protein phoP | 5  |                    | ELSVNEEVIK                      | 140 | 10 | 6  | 46.41 | b3°b3b5b7y6°y6                     | 1159.60 | 42.941  | 18854 | 2 | 580.30  | -20.63 |
| P14146 PHOP_SALTY Virulence transcriptional regulatory protein phoP | 6  |                    | ESHTIDVLMGR                     | 186 | 11 | 3  | 23.27 | b4y3y10                            | 1257.65 | 58.270  | 2730  | 2 | 629.33  | 20.58  |
| P14146 PHOP_SALTY Virulence transcriptional regulatory protein phoP | 7  |                    | MQALMR                          | 112 | 6  | 1  | 13.24 | b3                                 | 749.37  | 25.917  | 2488  | 2 | 375.19  | -9.77  |
| P14146 PHOP_SALTY Virulence transcriptional regulatory protein phoP | 8  |                    | EGWQDKVEVLSSGADDYVTKPF HIEEVMAR | 82  | 30 | 6  | 23.64 | b7°b7b14y6y9y10                    | 3435.64 | 126.189 | 3825  | 3 | 1145.88 | -4.48  |
| P14146 PHOP_SALTY Virulence transcriptional regulatory protein phoP | 9  | Phosphoryl STY(12) | VVSKDSLMLQLYPDAELR              | 168 | 18 | 4  | 20.57 | b6b13y5y12                         | 2157.07 | 82.570  | 21597 | 2 | 1079.04 | 6.11   |
| P14146 PHOP_SALTY Virulence transcriptional regulatory protein phoP | 10 | Oxidation+M(8)     | VVSKDSLMLQLYPDAELRESHTID VLMGR  | 168 | 29 | 3  | 17.18 | y4y6y14                            | 3331.67 | 77.199  | 6394  | 4 | 833.67  | -10.48 |
| P41031 CY_SALTY Thiosulfate-binding protein                         | 1  |                    | VNNPEIMGK                       | 286 | 9  | 5  | 44.93 | b1y4y6y8y9                         | 1001.50 | 36.808  | 71762 | 2 | 501.26  | -5.73  |
| P41031 CY_SALTY Thiosulfate-binding protein                         | 2  |                    | AYLNWLYSPPAQTIITHYYR            | 265 | 21 | 8  | 30.51 | b2b14°b14y4y8y15y19y21             | 2664.32 | 93.807  | 71252 | 3 | 888.78  | -0.92  |
| P41031 CY_SALTY Thiosulfate-binding protein                         | 3  |                    | QYEAQGFEVVIK                    | 226 | 13 | 12 | 48.5  | b3°b3b4°b4b11°b11b12°b12b13y2y3y13 | 1507.78 | 70.050  | 48675 | 2 | 754.40  | 3.16   |
| P41031 CY_SALTY Thiosulfate-binding protein                         | 4  |                    | NVEVFDTGGR                      | 189 | 10 | 4  | 35.84 | y6y7y8y10                          | 1093.53 | 47.903  | 47146 | 2 | 547.27  | 3.80   |
| P41031 CY_SALTY Thiosulfate-binding protein                         | 5  |                    | LPNNSSPFYSTMGFLVR               | 110 | 17 | 9  | 67    | b7b8°b8y3y5y9y11y13y17             | 1929.96 | 92.131  | 44724 | 2 | 965.48  | 3.54   |
| P41031 CY_SALTY Thiosulfate-binding protein                         | 6  |                    | ELFAALNPPFEQQWAK                | 37  | 16 | 8  | 42.87 | b3b15y1y6y7y9y12y16                | 1888.97 | 89.991  | 41864 | 2 | 944.99  | 5.17   |
| P41031 CY_SALTY Thiosulfate-binding protein                         | 7  |                    | GATTTFAER                       | 199 | 9  | 4  | 37.15 | y3y4y6y9                           | 953.46  | 31.608  | 20281 | 2 | 477.24  | -4.16  |
| P41031 CY_SALTY Thiosulfate-binding protein                         | 8  |                    | ELFAALNPPFEQQWAKDNGGDK          | 37  | 22 | 3  | 12.85 | b12y4y11                           | 2475.23 | 83.464  | 1789  | 2 | 1238.12 | 14.99  |
| P41031 CY_SALTY Thiosulfate-binding protein                         | 9  |                    | ADVVTYNQVTDVQILHDK              | 81  | 18 | 5  | 40.43 | b4b5°b5b9b10                       | 2058.03 | 64.054  | 4166  | 3 | 686.68  | -7.59  |
| P41031 CY_SALTY Thiosulfate-binding protein                         | 10 |                    | TNILAEFPVAVWDKNVQANGTEK         | 239 | 23 | 8  | 42.41 | b3°b3b4b12y5y6y10y19               | 2544.30 | 90.949  | 80259 | 3 | 848.77  | -1.73  |
| P41031 CY_SALTY Thiosulfate-binding protein                         | 11 |                    | YTYLAAWGAADNADGGDKAK            | 159 | 20 | 3  | 23.12 | y6y7y15                            | 2057.94 | 62.609  | 28024 | 3 | 686.65  | -7.36  |
| P41031 CY_SALTY Thiosulfate-binding protein                         | 12 |                    | LIPADWQSRLPNNSSPFYSTMGFL VR     | 101 | 26 | 3  | 11.72 | b3y13y24                           | 2996.50 | 96.167  | 27057 | 3 | 999.51  | -1.47  |
| P41031 CY_SALTY Thiosulfate-binding protein                         | 13 |                    | NVEVFDTGGRGATTTFAER             | 189 | 19 | 3  | 14.23 | b7b10y3                            | 2028.00 | 73.096  | 8891  | 3 | 676.67  | 10.41  |
| P41031 CY_SALTY Thiosulfate-binding protein                         | 14 |                    | LPNNSSPFYSTMGFLVRK              | 110 | 18 | 5  | 33.75 | b4b5°b5b6°b6                       | 2058.06 | 83.418  | 6887  | 3 | 686.69  | 6.05   |



|                                                              |    |                                          |                              |     |    |    |       |                                    |         |         |       |   |         |        |
|--------------------------------------------------------------|----|------------------------------------------|------------------------------|-----|----|----|-------|------------------------------------|---------|---------|-------|---|---------|--------|
| P41031 CY_SALTY Thiosulfate-binding protein                  | 15 |                                          | ADVVTYNQVTDVQILHDKGK         | 81  | 20 | 3  | 20.49 | b4b6b9                             | 2243.14 | 104.634 | 2193  | 3 | 748.38  | -13.17 |
| P41031 CY_SALTY Thiosulfate-binding protein                  | 16 | Oxidation+M(5)                           | TEQFMTQFLK                   | 179 | 10 | 3  | 25.84 | b3b7y7                             | 1288.61 | 23.520  | 8412  | 2 | 644.81  | -11.37 |
| P41031 CY_SALTY Thiosulfate-binding protein                  | 17 |                                          | ELFAALNPPFEQQWAKDNGG         | 37  | 20 | 0  | 7.56  |                                    | 2232.10 | 83.436  | 3484  | 2 | 1116.55 | 13.67  |
| P0A7V6 RS3_SALTY 30S ribosomal protein S3                    | 1  |                                          | LVADSITSQLER                 | 114 | 12 | 14 | 97.02 | b2b5y1y2y4y5y6*y6y8y9y10y11y12*y12 | 1331.71 | 60.897  | 48330 | 2 | 666.36  | -3.94  |
| P0A7V6 RS3_SALTY 30S ribosomal protein S3                    | 2  |                                          | VVADIAGVPAQINIAEVRKPELDAK    | 89  | 25 | 5  | 17.95 | b3y4y11y17y25                      | 2616.45 | 70.890  | 43862 | 4 | 654.87  | -10.17 |
| P0A7V6 RS3_SALTY 30S ribosomal protein S3                    | 3  |                                          | LGIVKPWNSTWFANTK             | 11  | 16 | 5  | 24.03 | y6y10°y10y12°y12                   | 1862.01 | 113.461 | 3227  | 3 | 621.34  | 8.46   |
| P0A7V6 RS3_SALTY 30S ribosomal protein S3                    | 4  |                                          | ADIDYNTSEAHTTYGVIGVK         | 179 | 20 | 3  | 13.7  | b9b18y4                            | 2154.00 | 58.463  | 20938 | 3 | 718.67  | -16.32 |
| P0A7V6 RS3_SALTY 30S ribosomal protein S3                    | 5  |                                          | EFADNLDSDFK                  | 27  | 11 | 4  | 26.28 | b3b4y10*y10                        | 1300.59 | 71.939  | 1618  | 3 | 434.20  | 15.02  |
| P0A7V6 RS3_SALTY 30S ribosomal protein S3                    | 6  |                                          | RAVQNAMR                     | 135 | 8  | 5  | 52.51 | b3b7y4*y4y6                        | 945.50  | 35.148  | 3222  | 2 | 473.25  | -6.26  |
| P0A7V6 RS3_SALTY 30S ribosomal protein S3                    | 7  |                                          | LVADSITSQLER                 | 114 | 12 | 0  | 3.11  |                                    | 1314.68 | 60.883  | 25563 | 2 | 657.84  | -4.46  |
| P63411 ACKA_SALTY Acetate kinase                             | 1  | Carbamidomethyl+C(19)                    | FAIIDAVNGDEYLSGLAECFHLPEAR   | 17  | 26 | 13 | 48.53 | b2b3b10y1y2y4°y4y5y9y10y19y22y26   | 2907.40 | 105.023 | 49131 | 3 | 969.81  | 1.76   |
| P63411 ACKA_SALTY Acetate kinase                             | 2  |                                          | EGTRPAVVIPTNEELVIAQDASR      | 374 | 23 | 10 | 61.42 | b3b8b9b14y5y6y7y12y14y23           | 2465.29 | 69.172  | 42497 | 3 | 822.44  | -3.47  |
| P63411 ACKA_SALTY Acetate kinase                             | 3  | Carbamidomethyl+C(1)                     | CVDTSMGLTPLEGLVMGTR          | 224 | 19 | 8  | 45.42 | b2b3b12b14y4y7y8y10                | 2037.00 | 94.924  | 32103 | 2 | 1019.00 | 6.77   |
| P63411 ACKA_SALTY Acetate kinase                             | 4  | Carbamidomethyl+C(14)                    | ESGLLGLTEVTSDCR              | 272 | 15 | 7  | 30.52 | b11b14y2y10y11°y11y15              | 1636.80 | 71.974  | 25117 | 2 | 818.90  | 6.86   |
| P63411 ACKA_SALTY Acetate kinase                             | 5  |                                          | NVAVFDATFHQTMPEESYLALPYSLYK  | 144 | 28 | 4  | 35.61 | y5y6y7y9                           | 3297.61 | 99.347  | 10979 | 3 | 1099.88 | 9.77   |
| P63411 ACKA_SALTY Acetate kinase                             | 6  | Carbamidomethyl+C(19)                    | FAIIDAVNGDEYLSGLAECFHLPEARIK | 17  | 28 | 3  | 17.38 | b6b8b15                            | 3148.60 | 98.698  | 63460 | 4 | 787.91  | 8.14   |
| P63411 ACKA_SALTY Acetate kinase                             | 7  |                                          | ELSLGKLGVLGFVDHER            | 342 | 18 | 3  | 22.24 | b3y3y4                             | 1998.05 | 68.559  | 2353  | 3 | 666.69  | -8.25  |
| P63411 ACKA_SALTY Acetate kinase                             | 8  | Carbamidomethyl+C(18)<br>;Oxidation+M(1) | MLTKESGLLGLTEVTSDCR          | 268 | 19 | 4  | 14.23 | b6y9°y9y15                         | 2126.03 | 103.414 | 1601  | 3 | 709.35  | -8.27  |
| P0A1A5 ILVE_SALTY Branched-chain-amino-acid aminotransferase | 1  |                                          | AGGNYLSLLVGSEARR             | 160 | 17 | 3  | 24.18 | b5b6b8                             | 1749.90 | 73.301  | 30360 | 3 | 583.97  | -15.00 |
| P0A1A5 ILVE_SALTY Branched-chain-amino-acid aminotransferase | 2  |                                          | AAPNTIPTAAK                  | 149 | 11 | 8  | 71.65 | b5y3y5y7y8y9*y9y11                 | 1054.58 | 32.674  | 28682 | 2 | 527.80  | -4.86  |
| P0A1A5 ILVE_SALTY Branched-chain-amino-acid aminotransferase | 3  |                                          | SVDGIQVGEGR                  | 266 | 11 | 12 | 76.67 | b1b3°b3b4°b4b10y4°y4y6y8y9y11      | 1116.57 | 41.979  | 25296 | 2 | 558.79  | 2.08   |
| P0A1A5 ILVE_SALTY Branched-chain-amino-acid aminotransferase | 4  |                                          | AGGNYLSLLVGSEAR              | 160 | 16 | 8  | 23.01 | b1b9b14°b14y2y3y5y16               | 1593.82 | 79.392  | 18113 | 2 | 797.41  | -4.90  |
| P0A1A5 ILVE_SALTY Branched-chain-amino-acid aminotransferase | 5  |                                          | IQQAFFGFLTGETEDK             | 284 | 16 | 4  | 26.41 | b6y5y9y13                          | 1830.89 | 78.688  | 7489  | 2 | 915.95  | 0.60   |
| P0A1A5 ILVE_SALTY Branched-chain-amino-acid aminotransferase | 6  | Carbamidomethyl+C(14)                    | FPVSQSIDELMEACR              | 69  | 15 | 3  | 17.27 | b3y3y11                            | 1781.86 | 82.491  | 5707  | 2 | 891.43  | 20.14  |
| P0A1A5 ILVE_SALTY Branched-chain-amino-acid aminotransferase | 7  |                                          | AGGNYLSLLVGSEARR             | 160 | 17 | 3  | 22.52 | b15b16y3                           | 1749.91 | 113.719 | 17035 | 2 | 875.46  | -6.84  |
| P0A1A5 ILVE_SALTY Branched-chain-amino-acid aminotransferase | 8  | Carbamidomethyl+C(12)                    | SVDGIQVGEGRCGPVTK            | 266 | 17 | 3  | 15.53 | b11b13y10                          | 1758.89 | 76.653  | 4803  | 2 | 879.95  | 6.39   |
| P0A1A5 ILVE_SALTY Branched-chain-amino-acid aminotransferase | 9  | Phosphoryl STY(11)                       | DGVLFTPPFTSSALPGITRDAIK      | 204 | 24 | 5  | 18.52 | b9b15b17y14°y14                    | 2596.30 | 103.338 | 2455  | 3 | 866.11  | -12.13 |
| P0A1A5 ILVE_SALTY Branched-chain-amino-acid aminotransferase | 10 | Phosphoryl STY(10)                       | VHVMShALHYGTSVFEGIR          | 22  | 19 | 3  | 23.41 | b7b9b10                            | 2220.06 | 46.077  | 2140  | 3 | 740.69  | 10.23  |
| P67551 YAE_P_SALTY UPF0253 protein yaeP                      | 1  | Carbamidomethyl+C(18)                    | YAEIASGDLGYVPDALGCVLK        | 11  | 21 | 8  | 34.34 | b3b11y1y9°y9y12y14y15              | 2211.11 | 103.659 | 14187 | 3 | 737.71  | 4.42   |

|                                                                                |   |                       |                                |     |    |    |        |                                                        |         |         |        |   |         |        |
|--------------------------------------------------------------------------------|---|-----------------------|--------------------------------|-----|----|----|--------|--------------------------------------------------------|---------|---------|--------|---|---------|--------|
| [P67551 YAEP_SALTY UPF0253 protein yaeP                                        | 2 |                       | AAAYAAANLLVSDYVNE              | 50  | 16 | 4  | 16.33  | b2b7y4y11                                              | 1683.82 | 86.454  | 2917   | 2 | 842.41  | -1.01  |
| [P67551 YAEP_SALTY UPF0253 protein yaeP                                        | 3 | Carbamidomethyl+C(19) | RYAEIASGDLGYVPDALGCVLK         | 10  | 22 | 3  | 12.85  | b6b8y9                                                 | 2367.19 | 88.887  | 15096  | 3 | 789.73  | -4.85  |
| [P0A9Y9 CC_SALTY Cold shock-like protein cC                                    | 1 |                       | GFGFITPADGSK                   | 15  | 12 | 23 | 161.66 | b2b3b4b5b7b8y1y2°y2y3°y3y4°y4y5°y5y6°y6y7°y7y8y9y10y12 | 1196.59 | 64.696  | 593464 | 2 | 598.80  | -3.26  |
| [P0A9Y9 CC_SALTY Cold shock-like protein cC                                    | 2 |                       | GPAAVNVTAI                     | 59  | 10 | 6  | 40.61  | b3b6*b6b9*b9y10                                        | 912.51  | 60.012  | 32173  | 1 | 912.51  | -7.69  |
| [P0A9Y9 CC_SALTY Cold shock-like protein cC                                    | 3 |                       | TLAEGQNVEFEIQDGQK              | 42  | 17 | 6  | 39.95  | b11y5y9y10y11°y11                                      | 1905.93 | 57.800  | 14626  | 2 | 953.47  | 6.47   |
| [P0A9Y9 CC_SALTY Cold shock-like protein cC                                    | 4 |                       | GFGFITPADGSKDVFVHFSAIQGN GFK   | 15  | 27 | 7  | 50.54  | b8b15y8*y8y9y10y11                                     | 2843.38 | 65.607  | 7507   | 3 | 948.46  | -14.00 |
| [P0A9Y9 CC_SALTY Cold shock-like protein cC                                    | 5 |                       | DVVFVHFSAIQNGGFK               | 27  | 15 | 3  | 25.35  | y6y9y11                                                | 1665.85 | 73.948  | 34714  | 2 | 833.43  | 4.32   |
| [P0A9Y9 CC_SALTY Cold shock-like protein cC                                    | 6 |                       | TLAEGQNVEFEIQDGQKGPAAVN VTAI   | 42  | 27 | 4  | 17.6   | b3°b3b5b14                                             | 2799.42 | 75.967  | 133441 | 3 | 933.81  | -0.35  |
| [P0A9Y9 CC_SALTY Cold shock-like protein cC                                    | 7 |                       | GFITPADGSK                     | 17  | 10 | 0  | 3.11   |                                                        | 992.51  | 64.631  | 4231   | 1 | 992.51  | 2.89   |
| [P0A9Y9 CC_SALTY Cold shock-like protein cC                                    | 8 |                       | TLAEGQNVEFEIQ                  | 42  | 13 | 1  | 7.34   | y11                                                    | 1477.71 | 57.807  | 2692   | 2 | 739.36  | -3.06  |
| [P69936 YDFG_SALTY NADP-dependent L-serine/L-allo-threonine dehydrogenase ydfG | 1 |                       | AVLPGMVER                      | 115 | 9  | 6  | 37.15  | y2y4°y4y6y7y9                                          | 971.52  | 53.643  | 34386  | 2 | 486.27  | -9.80  |
| [P69936 YDFG_SALTY NADP-dependent L-serine/L-allo-threonine dehydrogenase ydfG | 2 |                       | VTDIEPGLVGGTEFSSVR             | 171 | 18 | 10 | 50.12  | b2b5b14y1y5y7y9y13y14y18                               | 1862.96 | 69.351  | 29598  | 2 | 931.99  | 7.54   |
| [P69936 YDFG_SALTY NADP-dependent L-serine/L-allo-threonine dehydrogenase ydfG | 3 |                       | AAIEEMMASLPAQWR                | 58  | 15 | 4  | 25.35  | y5y9y13y15                                             | 1703.83 | 90.933  | 28908  | 2 | 852.42  | 5.52   |
| [P69936 YDFG_SALTY NADP-dependent L-serine/L-allo-threonine dehydrogenase ydfG | 4 |                       | TDLHGTAVR                      | 162 | 9  | 3  | 29.37  | b3b6y5                                                 | 969.50  | 24.111  | 9284   | 2 | 485.26  | -8.56  |
| [P69936 YDFG_SALTY NADP-dependent L-serine/L-allo-threonine dehydrogenase ydfG | 5 | Carbamidomethyl+C(15) | MIVLVTGATAGFGECIARR            | 0   | 19 | 5  | 22.01  | b2b3y2y13y14                                           | 2022.07 | 80.252  | 4489   | 3 | 674.69  | 2.72   |
| [P69936 YDFG_SALTY NADP-dependent L-serine/L-allo-threonine dehydrogenase ydfG | 6 |                       | GHIINIGSTAGSWPYAGGNVYGAT K     | 126 | 25 | 5  | 17.95  | b3b5*b5b9y5                                            | 2491.28 | 36.118  | 2122   | 3 | 831.10  | 16.66  |
| [P69936 YDFG_SALTY NADP-dependent L-serine/L-allo-threonine dehydrogenase ydfG | 7 |                       | DELGENVLTAQLDVR                | 41  | 15 | 3  | 23.29  | b11b12y12                                              | 1671.86 | 52.920  | 1762   | 2 | 836.43  | 4.31   |
| [P69936 YDFG_SALTY NADP-dependent L-serine/L-allo-threonine dehydrogenase ydfG | 8 | Oxidation+M(9)        | ASVEDWETMIDTNNK                | 93  | 15 | 3  | 17.27  | b3y4y6                                                 | 1768.76 | 42.957  | 22884  | 4 | 442.95  | -6.14  |
| [P65215 KDSA_SALTY 2-dehydro-3-deoxyphosphooctonate aldolase                   | 1 |                       | VITDVHEASQAQPVADVVDVIQL PAFLAR | 91  | 29 | 12 | 61.09  | b2b8b9b10°b10b11b12*b12b23y1y2y6                       | 3101.67 | 104.962 | 38331  | 3 | 1034.56 | 2.68   |
| [P65215 KDSA_SALTY 2-dehydro-3-deoxyphosphooctonate aldolase                   | 2 |                       | AGMAVGLAGLFLSHPDPANAK          | 226 | 22 | 3  | 21.6   | b5b6y3                                                 | 2166.12 | 120.390 | 9017   | 3 | 722.71  | 9.24   |
| [P65215 KDSA_SALTY 2-dehydro-3-deoxyphosphooctonate aldolase                   | 3 |                       | GANFGYDNLVVDMLGFSVMK           | 168 | 20 | 4  | 13.7   | b10y2y9y14                                             | 2177.02 | 102.743 | 3408   | 3 | 726.34  | -9.76  |
| [P65215 KDSA_SALTY 2-dehydro-3-deoxyphosphooctonate aldolase                   | 4 |                       | ASFDK                          | 55  | 5  | 2  | 12.79  | b3°b3                                                  | 567.27  | 49.704  | 12989  | 1 | 567.27  | -11.73 |
| [P65215 KDSA_SALTY 2-dehydro-3-deoxyphosphooctonate aldolase                   | 5 |                       | LGIPYVFK                       | 47  | 8  | 4  | 47.74  | b3y3y4y5                                               | 936.54  | 76.772  | 12933  | 2 | 468.77  | -15.51 |
| [P65215 KDSA_SALTY 2-dehydro-3-deoxyphosphooctonate aldolase                   | 6 | Carbamidomethyl+C(17) | VSGNSPVIFDVTHALQCR             | 189 | 18 | 5  | 23.65  | b7°b7b10b12y3                                          | 2000.04 | 69.705  | 10303  | 2 | 1000.52 | 16.66  |
| [P65215 KDSA_SALTY 2-dehydro-3-deoxyphosphooctonate aldolase                   | 7 |                       | QTDLVEAMAK                     | 120 | 10 | 5  | 27.6   | b8°b8b9y8°y8                                           | 1105.55 | 103.545 | 5859   | 1 | 1105.55 | -3.75  |

|                                                             |    |                                       |                              |     |    |    |        |                                         |         |         |        |   |         |        |
|-------------------------------------------------------------|----|---------------------------------------|------------------------------|-----|----|----|--------|-----------------------------------------|---------|---------|--------|---|---------|--------|
| P65215 KDSA_SALTY 2-dehydro-3-deoxyphosphoactonate aldolase | 8  | Carbamidomethyl+C(2)                  | ICEHYVTVTQK                  | 36  | 11 | 3  | 26.28  | b7b8y7                                  | 1377.70 | 81.534  | 3620   | 2 | 689.36  | 14.18  |
| P65215 KDSA_SALTY 2-dehydro-3-deoxyphosphoactonate aldolase | 9  |                                       | DPFGAASGGR                   | 207 | 10 | 3  | 25.84  | b7y7y9                                  | 934.44  | 107.251 | 1567   | 1 | 934.44  | 6.66   |
| P65215 KDSA_SALTY 2-dehydro-3-deoxyphosphoactonate aldolase | 10 |                                       | TGAVINVKKPQFVSPGQMGNIVDK     | 130 | 24 | 5  | 18.52  | b3y8°y8y10y12                           | 2527.33 | 109.356 | 3423   | 3 | 843.12  | -14.30 |
| P65215 KDSA_SALTY 2-dehydro-3-deoxyphosphoactonate aldolase | 11 |                                       | AIDDLVKSFDELDTEN             | 268 | 16 | 3  | 16.33  | b3y4y13                                 | 1823.86 | 88.575  | 2405   | 2 | 912.44  | 4.95   |
| P65215 KDSA_SALTY 2-dehydro-3-deoxyphosphoactonate aldolase | 12 | Oxidation+M(8)                        | GPGLGEGMK                    | 70  | 9  | 5  | 57.97  | b3b5y4y5y6                              | 933.45  | 68.502  | 4498   | 1 | 933.45  | 13.73  |
| P65215 KDSA_SALTY 2-dehydro-3-deoxyphosphoactonate aldolase | 13 | Oxidation+M(8)                        | QTDLVEAMAK                   | 120 | 10 | 4  | 25.84  | b4b6°b6y5                               | 1121.54 | 46.061  | 2555   | 2 | 561.28  | -5.99  |
| Q7CPL6 RL18_SALTY 50S ribosomal protein L18                 | 1  |                                       | VQALADAAR                    | 102 | 9  | 9  | 59.73  | b2*b2b3*b3y3y5y6y7y9                    | 914.49  | 32.173  | 167211 | 2 | 457.75  | -13.95 |
| Q7CPL6 RL18_SALTY 50S ribosomal protein L18                 | 2  |                                       | AIAEQLK                      | 56  | 7  | 7  | 39.27  | y2y3*y3y4*y4y5y7                        | 772.45  | 32.853  | 44526  | 2 | 386.73  | -12.41 |
| Q7CPL6 RL18_SALTY 50S ribosomal protein L18                 | 3  |                                       | GKDVSVFDR                    | 85  | 9  | 5  | 43.93  | b8y3y4y6y9                              | 1036.53 | 43.214  | 35528  | 2 | 518.77  | -7.18  |
| Q7CPL6 RL18_SALTY 50S ribosomal protein L18                 | 4  |                                       | SGFYQHGR                     | 94  | 8  | 3  | 31.94  | b4b5y4                                  | 951.43  | 27.281  | 93347  | 2 | 476.22  | -8.85  |
| Q7CPL6 RL18_SALTY 50S ribosomal protein L18                 | 5  |                                       | HIYAQVIAPNGSEVLVAASTVEK      | 33  | 23 | 4  | 25.55  | b3b11y6y7                               | 2396.25 | 85.270  | 4165   | 3 | 799.42  | -14.26 |
| Q7CPL6 RL18_SALTY 50S ribosomal protein L18                 | 6  |                                       | DAAAAVGK                     | 68  | 8  | 4  | 31.94  | b7°b7y5y6                               | 702.37  | 35.135  | 2397   | 1 | 702.37  | -9.21  |
| Q7CPL6 RL18_SALTY 50S ribosomal protein L18                 | 7  | Phosphoryl STY()                      | HIYAQVIAPNGSEVLVAASTVEK      | 33  | 23 | 3  | 12.5   | b4y3y5                                  | 2476.24 | 134.773 | 1767   | 3 | 826.09  | 1.97   |
| P0A2E1 GLYA_SALTY Serine hydroxymethyltransferase           | 1  |                                       | LNSAVFPSAQGGPLMHVIAGK        | 251 | 21 | 12 | 36.73  | b2b3°b3b4°b4°b4b10°b10b21y3y4y21        | 2094.10 | 78.527  | 68550  | 3 | 698.71  | -7.23  |
| P0A2E1 GLYA_SALTY Serine hydroxymethyltransferase           | 2  |                                       | VMQAQGSQLTNK                 | 42  | 12 | 17 | 133.85 | b2b3b5b9y1y2y3y4y5y6y7y8°y8y9y10°y10y12 | 1304.66 | 30.365  | 49236  | 2 | 652.83  | -0.09  |
| P0A2E1 GLYA_SALTY Serine hydroxymethyltransferase           | 3  |                                       | MIIGFSAYSQGVVDWAK            | 168 | 17 | 10 | 68.83  | b8b12y4y6°y6y12y13°y13y14y16            | 1800.88 | 103.445 | 29617  | 3 | 600.97  | -10.24 |
| P0A2E1 GLYA_SALTY Serine hydroxymethyltransferase           | 4  | Carbamidomethyl+C(7)                  | ELAGWMCDVLDNINDEATIER        | 380 | 21 | 6  | 13.25  | b2b4y2y8y11y21                          | 2464.13 | 102.241 | 19733  | 2 | 1232.57 | 7.53   |
| P0A2E1 GLYA_SALTY Serine hydroxymethyltransferase           | 5  |                                       | YAEGYPGKR                    | 54  | 9  | 7  | 57.97  | b4b8y4y6y7°y7y9                         | 1040.51 | 25.293  | 7579   | 2 | 520.76  | -7.39  |
| P0A2E1 GLYA_SALTY Serine hydroxymethyltransferase           | 6  |                                       | QEEHIELIASENYTSR             | 25  | 17 | 3  | 22.52  | b9y7y8                                  | 2015.97 | 118.453 | 1974   | 2 | 1008.49 | 1.94   |
| P0A2E1 GLYA_SALTY Serine hydroxymethyltransferase           | 7  |                                       | NSVPNDPKSPFVTSGIR            | 346 | 17 | 7  | 51.34  | b8b9b11y8y9y11y14                       | 1814.91 | 52.895  | 37887  | 3 | 605.64  | -14.19 |
| P0A2E1 GLYA_SALTY Serine hydroxymethyltransferase           | 8  |                                       | QEEHIELIASENYTSRVMQAQGSQLTNK | 25  | 29 | 3  | 21.64  | b9y14y15                                | 3301.62 | 84.139  | 22392  | 4 | 826.16  | 1.26   |
| P0A2E1 GLYA_SALTY Serine hydroxymethyltransferase           | 9  |                                       | MIIGFSAYSQGVVDWAKMR          | 168 | 19 | 5  | 22.52  | b9°b9b12b16y11                          | 2088.03 | 101.713 | 10323  | 3 | 696.68  | -7.25  |
| P0A2E1 GLYA_SALTY Serine hydroxymethyltransferase           | 10 |                                       | LYNIVPYGIDESGKIDYDEMAK       | 138 | 22 | 5  | 34.67  | b13°b13y8y9y10                          | 2533.22 | 87.865  | 4327   | 3 | 845.08  | -0.39  |
| P0A2E1 GLYA_SALTY Serine hydroxymethyltransferase           | 11 |                                       | VRQEEHIELIASENYTSR           | 23  | 19 | 6  | 19.56  | b5°b5b13°b13y8y11                       | 2271.11 | 112.452 | 4074   | 3 | 757.71  | -9.78  |
| P0A2E1 GLYA_SALTY Serine hydroxymethyltransferase           | 12 |                                       | EHPKPMIIGFSAYSQGVVDWAK       | 163 | 22 | 8  | 55.75  | b13b14y10y12y13y14y16°y16               | 2420.22 | 105.164 | 1704   | 4 | 605.81  | -8.07  |
| P0A2E1 GLYA_SALTY Serine hydroxymethyltransferase           | 13 | Oxidation+M(15)                       | LNSAVFPSAQGGPLMHVIAGK        | 251 | 21 | 5  | 13.25  | b4°b4b7°b7y3                            | 2110.09 | 85.122  | 33923  | 3 | 704.04  | -8.91  |
| P0A2E1 GLYA_SALTY Serine hydroxymethyltransferase           | 14 | Oxidation+M(1)                        | MIIGFSAYSQGVVDWAK            | 168 | 17 | 7  | 24.93  | b7°b7b9b12°b12y5°y5                     | 1816.90 | 66.888  | 11303  | 3 | 606.30  | 2.15   |
| P0A2E1 GLYA_SALTY Serine hydroxymethyltransferase           | 15 | Carbamidomethyl+C(12);Oxidation+M(11) | EAEVKELAGWMCDVLDNINDEATIER   | 375 | 26 | 3  | 17.86  | y3y8y13                                 | 3036.36 | 79.742  | 5723   | 4 | 759.85  | -10.94 |

|                                                                          |    |                      |                             |     |    |    |       |                              |         |         |       |   |         |        |
|--------------------------------------------------------------------------|----|----------------------|-----------------------------|-----|----|----|-------|------------------------------|---------|---------|-------|---|---------|--------|
| [P67605 YEEX_SALTY UPF0265 protein yeeX                                  | 1  |                      | METTKPSFQDVLEFVR            | 0   | 16 | 7  | 40.29 | b10b11y4°y4y10y11y16         | 1926.95 | 85.477  | 59009 | 3 | 642.99  | -8.49  |
| [P67605 YEEX_SALTY UPF0265 protein yeeX                                  | 2  |                      | ETTKPSFQDVLEFVR             | 1   | 15 | 6  | 25.35 | b4b6b10°b10b12°y15           | 1795.90 | 71.840  | 18218 | 2 | 898.45  | -11.42 |
| [P67605 YEEX_SALTY UPF0265 protein yeeX                                  | 3  |                      | EIQDIEK                     | 26  | 7  | 12 | 49.06 | b1b2b5°b5°b5y2°y2y3°y3y4y5y7 | 874.45  | 35.207  | 7888  | 2 | 437.73  | -4.05  |
| [P67605 YEEX_SALTY UPF0265 protein yeeX                                  | 4  |                      | NAEISK                      | 82  | 6  | 3  | 26.03 | b3b4*b4                      | 661.35  | 28.933  | 39780 | 1 | 661.35  | -5.91  |
| [P02911 ARGT_SALTY Lysine-arginine-ornithine-binding periplasmic protein | 1  | Carbamidomethyl+C(1) | CTWVASDFDALIPSLK            | 66  | 16 | 5  | 27.08 | b11b12b14y2y4                | 1822.92 | 98.654  | 18392 | 2 | 911.96  | 6.83   |
| [P02911 ARGT_SALTY Lysine-arginine-ornithine-binding periplasmic protein | 2  |                      | GVDVVAYANQDLIYSDLTAGR       | 155 | 21 | 5  | 17.87 | b6b11y7y14*y14               | 2240.11 | 113.458 | 2442  | 2 | 1120.56 | -5.89  |
| [P02911 ARGT_SALTY Lysine-arginine-ornithine-binding periplasmic protein | 3  |                      | IGTDTTYAPFSSK               | 29  | 13 | 7  | 43.73 | b4b6b8b9°b9y4°y4             | 1387.66 | 47.132  | 2163  | 2 | 694.34  | -7.57  |
| [P02911 ARGT_SALTY Lysine-arginine-ornithine-binding periplasmic protein | 4  |                      | RQQEIAFSDK                  | 98  | 10 | 4  | 25.84 | b3b5y4°y4                    | 1221.64 | 80.155  | 17943 | 2 | 611.32  | 12.49  |
| [P02911 ARGT_SALTY Lysine-arginine-ornithine-binding periplasmic protein | 5  |                      | QQEIAFSDKLYAADSR            | 99  | 16 | 3  | 24.7  | y5y14y15                     | 1841.89 | 93.804  | 7429  | 2 | 921.45  | -9.08  |
| [P02911 ARGT_SALTY Lysine-arginine-ornithine-binding periplasmic protein | 6  |                      | QPAGKEYAFAGPSVK             | 193 | 15 | 4  | 28.14 | b10b11b13y9                  | 1549.81 | 80.972  | 5865  | 2 | 775.41  | 6.62   |
| [P0A7Z7 RPOA_SALTY DNA-directed RNA polymerase subunit alpha             | 1  | Carbamidomethyl+C(6) | LLVDACYSPVER                | 170 | 12 | 9  | 92.68 | b2y4y5y6y7y8y9y10y12         | 1421.71 | 59.681  | 60932 | 2 | 711.36  | -1.72  |
| [P0A7Z7 RPOA_SALTY DNA-directed RNA polymerase subunit alpha             | 2  |                      | LVDIEQVSSTHAK               | 12  | 13 | 4  | 19.69 | b2b10y3y6                    | 1426.73 | 46.199  | 52511 | 3 | 476.25  | -13.18 |
| [P0A7Z7 RPOA_SALTY DNA-directed RNA polymerase subunit alpha             | 3  |                      | VTLEPLER                    | 25  | 8  | 7  | 52.51 | y1y4°y4y5y6y7y8              | 956.53  | 52.730  | 48152 | 2 | 478.77  | -13.21 |
| [P0A7Z7 RPOA_SALTY DNA-directed RNA polymerase subunit alpha             | 4  |                      | IAYNVEAAR                   | 182 | 9  | 6  | 52.96 | b2y3y6y7y8y9                 | 1006.53 | 39.684  | 47164 | 2 | 503.77  | -6.06  |
| [P0A7Z7 RPOA_SALTY DNA-directed RNA polymerase subunit alpha             | 5  | Carbamidomethyl+C(9) | ILLSSMPGCAVTEVEIDGVLHEYS TK | 45  | 26 | 4  | 21.49 | b3y6°y6y7                    | 2848.42 | 91.093  | 23097 | 3 | 950.14  | 2.31   |
| [P0A7Z7 RPOA_SALTY DNA-directed RNA polymerase subunit alpha             | 6  |                      | LENWPPASIADE                | 317 | 12 | 4  | 21.29 | b5b11y11y12                  | 1341.63 | 57.569  | 12093 | 2 | 671.32  | -4.64  |
| [P0A7Z7 RPOA_SALTY DNA-directed RNA polymerase subunit alpha             | 7  |                      | LVIEMETNGTIDPEEAIRR         | 200 | 19 | 5  | 24.74 | b7b8b12y12°y12               | 2186.08 | 115.602 | 6719  | 2 | 1093.54 | -14.52 |
| [P0A7Z7 RPOA_SALTY DNA-directed RNA polymerase subunit alpha             | 8  |                      | AEAIHYIGDLVQR               | 271 | 13 | 4  | 19.69 | b6b12*b12y9                  | 1484.79 | 77.665  | 16087 | 2 | 742.90  | 1.64   |
| [P0A7Z7 RPOA_SALTY DNA-directed RNA polymerase subunit alpha             | 9  |                      | TPNLGK                      | 291 | 6  | 2  | 13.24 | b5*b5                        | 629.37  | 29.160  | 8043  | 1 | 629.37  | 13.19  |
| [P0A7Z7 RPOA_SALTY DNA-directed RNA polymerase subunit alpha             | 10 |                      | TEVELLK                     | 284 | 7  | 4  | 39.27 | b3b5°b5y6                    | 831.49  | 36.071  | 4985  | 2 | 416.25  | 5.51   |
| [P0A7Z7 RPOA_SALTY DNA-directed RNA polymerase subunit alpha             | 11 |                      | DVRQPEVK                    | 235 | 8  | 3  | 34.95 | b4b6y4                       | 970.52  | 42.020  | 11379 | 2 | 485.76  | -14.65 |

|                                                                          |    |                       |                                |     |    |    |       |                            |         |         |       |   |         |        |
|--------------------------------------------------------------------------|----|-----------------------|--------------------------------|-----|----|----|-------|----------------------------|---------|---------|-------|---|---------|--------|
| P0A7Z7 RPOA_SALTY DNA-directed RNA polymerase subunit alpha              | 12 | Carbamidomethyl+C(18) | IHSEEDERPIGRLLVDACYSPPER       | 158 | 24 | 8  | 30.77 | b3b9°b9y3°y3y6y8y10        | 2840.44 | 136.339 | 5623  | 3 | 947.49  | 14.70  |
| P0A7Z7 RPOA_SALTY DNA-directed RNA polymerase subunit alpha              | 13 |                       | DIEQVSSTHAK                    | 14  | 11 | 1  | 7.32  | b10                        | 1214.61 | 46.182  | 10546 | 2 | 607.81  | 5.13   |
| P0A7Z7 RPOA_SALTY DNA-directed RNA polymerase subunit alpha              | 14 |                       | LVDIEQVSST                     | 12  | 10 | 0  | 3.56  |                            | 1090.58 | 46.242  | 2897  | 3 | 364.20  | 13.88  |
| P67617 FETP_SALTY Probable Fe(2+)-trafficking protein                    | 1  |                       | LLEQEMVSFLFEGK                 | 64  | 14 | 10 | 38.06 | b1b5°b5b9b12°b12y3°y3y9y14 | 1669.87 | 101.766 | 30289 | 2 | 835.44  | 10.67  |
| P67617 FETP_SALTY Probable Fe(2+)-trafficking protein                    | 2  |                       | QTMLINEK                       | 45  | 8  | 8  | 34.95 | b3b8y2°y2y3°y3y5y8         | 976.51  | 41.951  | 26329 | 2 | 488.76  | -0.50  |
| P67617 FETP_SALTY Probable Fe(2+)-trafficking protein                    | 3  |                       | DAEQQDFQLYPGELGK               | 12  | 16 | 3  | 13.95 | y4°y4y8                    | 1766.80 | 69.890  | 15710 | 2 | 883.90  | -13.40 |
| P67617 FETP_SALTY Probable Fe(2+)-trafficking protein                    | 4  |                       | IYNEISK                        | 29  | 7  | 3  | 36.26 | b4y5y6                     | 866.47  | 41.957  | 7434  | 2 | 433.74  | 9.16   |
| P67617 FETP_SALTY Probable Fe(2+)-trafficking protein                    | 5  | Carbamidomethyl+C(4)  | TIFCTYLQR                      | 3   | 9  | 3  | 29.37 | b5b7y3                     | 1201.62 | 55.759  | 7823  | 2 | 601.31  | 13.61  |
| P67617 FETP_SALTY Probable Fe(2+)-trafficking protein                    | 6  |                       | DAWAQWQHKTMLINEK               | 36  | 17 | 3  | 15.53 | b10b16y3                   | 2127.06 | 100.178 | 8954  | 3 | 709.69  | 7.12   |
| P67617 FETP_SALTY Probable Fe(2+)-trafficking protein                    | 7  |                       | KLNMMAEHR                      | 53  | 10 | 6  | 56.2  | b5b6b7b8y4°y4              | 1243.59 | 35.142  | 3102  | 3 | 415.20  | -8.93  |
| P65889 PUR7_SALTY Phohoribosylaminoimidazole-succinocarboxamide synthase | 1  |                       | LAEAGIPTQMER                   | 60  | 12 | 8  | 66.66 | b2b4y3y6y8y9y10y12         | 1315.67 | 50.476  | 51169 | 2 | 658.34  | -0.46  |
| P65889 PUR7_SALTY Phohoribosylaminoimidazole-succinocarboxamide synthase | 2  |                       | QSLGGLIEAYEAVHR                | 215 | 16 | 5  | 26.41 | b15y8°y8y10y13             | 1713.87 | 85.454  | 44152 | 3 | 571.96  | -13.60 |
| P65889 PUR7_SALTY Phohoribosylaminoimidazole-succinocarboxamide synthase | 3  |                       | FNHFIMTK                       | 52  | 8  | 7  | 31.94 | b7y2°y2y6y7°y7y8           | 1037.53 | 28.362  | 8737  | 2 | 519.27  | 10.47  |
| P65889 PUR7_SALTY Phohoribosylaminoimidazole-succinocarboxamide synthase | 4  |                       | LGVEEGMELNPPIFDLFLK            | 104 | 19 | 6  | 44.64 | b4b7b12b13b14*b14          | 2161.10 | 100.690 | 3725  | 3 | 721.04  | -10.39 |
| P65889 PUR7_SALTY Phohoribosylaminoimidazole-succinocarboxamide synthase | 5  |                       | TVYSTENPDLLVLEFR               | 13  | 16 | 5  | 33.09 | b3b6b13y10y13              | 1895.98 | 88.663  | 57373 | 2 | 948.49  | 0.39   |
| P65889 PUR7_SALTY Phohoribosylaminoimidazole-succinocarboxamide synthase | 6  |                       | GMVNNK                         | 46  | 6  | 1  | 13.24 | y4                         | 662.33  | 42.904  | 14220 | 1 | 662.33  | -1.75  |
| P65889 PUR7_SALTY Phohoribosylaminoimidazole-succinocarboxamide synthase | 7  | Carbamidomethyl+C(7)  | LLSDTECLVK                     | 72  | 10 | 3  | 35.84 | y6y7y8                     | 1177.61 | 87.783  | 5421  | 1 | 1177.61 | 0.93   |
| P65889 PUR7_SALTY Phohoribosylaminoimidazole-succinocarboxamide synthase | 8  |                       | TVYSTENPDLLVLEFRNDTSAGD GAR    | 13  | 26 | 3  | 11.72 | b10b13y13                  | 2840.35 | 109.839 | 18729 | 3 | 947.46  | -6.79  |
| P0A1F8 DHAS_SALTY Aartate-semialdehyde dehydrogenase                     | 1  | Carbamidomethyl+C(14) | ILNTASVIPVDGLCVR               | 252 | 16 | 5  | 43.98 | b15y5y6y8y9                | 1726.94 | 77.789  | 30649 | 2 | 863.98  | -5.30  |
| P0A1F8 DHAS_SALTY Aartate-semialdehyde dehydrogenase                     | 2  |                       | ELTPAAVTGTLTTPVGR              | 315 | 17 | 5  | 21.71 | b3b6y4y14y17               | 1683.94 | 68.789  | 23658 | 2 | 842.47  | 5.07   |
| P0A1F8 DHAS_SALTY Aartate-semialdehyde dehydrogenase                     | 3  |                       | NVGFIGWR                       | 2   | 8  | 5  | 31.94 | b5°b5b6y6y8                | 948.50  | 70.847  | 16676 | 2 | 474.75  | -7.59  |
| P0A1F8 DHAS_SALTY Aartate-semialdehyde dehydrogenase                     | 4  | Carbamidomethyl+C(8)  | ALDIIVTCQGGDYTNEIYPK           | 65  | 20 | 6  | 26.8  | b11°b11b14°b14y7y8         | 2270.13 | 112.411 | 7073  | 2 | 1135.57 | 14.30  |
| P0A1F8 DHAS_SALTY Aartate-semialdehyde dehydrogenase                     | 5  |                       | ELLTQMGQLYGHVADELATPSSAILEDIER | 174 | 29 | 4  | 17.18 | b5b14°b14b21               | 3170.60 | 98.699  | 6638  | 3 | 1057.54 | -1.77  |
| P0A1F8 DHAS_SALTY Aartate-semialdehyde dehydrogenase                     | 6  |                       | GMVGSVLMQR                     | 10  | 10 | 7  | 38.63 | b4b8°b8b9°b9*b9y5          | 1077.56 | 47.110  | 6597  | 2 | 539.29  | 8.84   |

|                                                      |    |                       |                                                   |     |    |    |       |                                   |         |         |        |   |         |        |
|------------------------------------------------------|----|-----------------------|---------------------------------------------------|-----|----|----|-------|-----------------------------------|---------|---------|--------|---|---------|--------|
| P0A1F8 DHAS_SALTY Aartate-semialdehyde dehydrogenase | 7  |                       | DFDAIRPVFFSTSQFGQAAPTFGD<br>TSTGTLQDAFDLDALK      | 25  | 40 | 5  | 13.94 | b14y7y9y13*y13                    | 4298.03 | 106.474 | 3627   | 3 | 1433.35 | -6.02  |
| P0A1F8 DHAS_SALTY Aartate-semialdehyde dehydrogenase | 8  |                       | SGELPVDNFGVPLAGSLIPWIDK                           | 210 | 23 | 6  | 12.5  | b2b3b15°b15y5y23                  | 2424.28 | 111.901 | 2195   | 2 | 1212.65 | 1.31   |
| P0A1F8 DHAS_SALTY Aartate-semialdehyde dehydrogenase | 9  |                       | LNMGPEFLSAFTVGDQLLWGAAE<br>PLRR                   | 335 | 27 | 5  | 22.37 | b8°b8b9°b9b15                     | 2988.53 | 115.960 | 208957 | 4 | 747.89  | -3.76  |
| P0A1F8 DHAS_SALTY Aartate-semialdehyde dehydrogenase | 10 |                       | MVEERDFDAIRPVFFSTSQFGQAA<br>PTFGDTSTGTLQDAFDLDALK | 20  | 45 | 3  | 24.25 | b5y9y10                           | 4942.34 | 101.719 | 10082  | 4 | 1236.34 | -3.16  |
| P0A1F8 DHAS_SALTY Aartate-semialdehyde dehydrogenase | 11 |                       | SGELPVDNFGVPLAGSLIPWIDKQ<br>LDNGQSR               | 210 | 31 | 5  | 15.53 | b6b13b16y8*y8                     | 3322.70 | 111.351 | 7956   | 3 | 1108.24 | -2.87  |
| P0A1F8 DHAS_SALTY Aartate-semialdehyde dehydrogenase | 12 | Oxidation+M(1)        | MKDDAIIILDVPVNDVITDGLNNG<br>VK                    | 103 | 26 | 4  | 17.43 | b7y9y11y14                        | 2826.45 | 115.570 | 15129  | 3 | 942.82  | -1.81  |
| P02936 OMPA_SALTY Outer membrane protein A           | 1  | Carbamidomethyl+C(13) | GMGESNPVTGNTCDNVKPR                               | 302 | 19 | 11 | 55.54 | b2b3y2y5y6y10y11°y11y13<br>y17y19 | 2032.90 | 38.374  | 50216  | 3 | 678.30  | -8.95  |
| P02936 OMPA_SALTY Outer membrane protein A           | 2  | Carbamidomethyl+C(6)  | AALIDCLAPDR                                       | 321 | 11 | 7  | 50.62 | b3b8y1y3y6y8y11                   | 1214.62 | 62.233  | 49781  | 2 | 607.81  | 2.21   |
| P02936 OMPA_SALTY Outer membrane protein A           | 3  |                       | GVKDVVTQPQA                                       | 339 | 11 | 6  | 23.27 | b6b8y1y3*y3y11                    | 1141.61 | 38.137  | 24857  | 2 | 571.31  | -5.77  |
| P02936 OMPA_SALTY Outer membrane protein A           | 4  |                       | GDNINGAYK                                         | 85  | 9  | 4  | 37.15 | y4y5y7y9                          | 951.44  | 29.156  | 9964   | 2 | 476.23  | -10.14 |
| P02936 OMPA_SALTY Outer membrane protein A           | 5  |                       | IGSDAYNQGLSEKR                                    | 267 | 14 | 10 | 43.66 | b2b3°b3b4°b4b5b9°b9y3y1<br>4      | 1537.74 | 35.188  | 7490   | 3 | 513.25  | -10.72 |
| P02936 OMPA_SALTY Outer membrane protein A           | 6  |                       | HFTLK                                             | 217 | 5  | 1  | 12.79 | b3                                | 645.36  | 47.043  | 4762   | 1 | 645.36  | -12.86 |
| P02936 OMPA_SALTY Outer membrane protein A           | 7  |                       | LGGMVWR                                           | 117 | 7  | 3  | 39.27 | b5y3y5                            | 818.43  | 39.310  | 4263   | 1 | 818.43  | -6.79  |
| P02936 OMPA_SALTY Outer membrane protein A           | 8  |                       | DNTWYAGAK                                         | 24  | 9  | 6  | 65.75 | y3y5y6y7°y7y8                     | 1025.48 | 76.325  | 3120   | 1 | 1025.48 | 14.52  |
| P02936 OMPA_SALTY Outer membrane protein A           | 9  |                       | IGSDAYNQGLSEK                                     | 267 | 13 | 6  | 19.69 | b10°b10°b10y6*y6y9                | 1381.68 | 32.552  | 1623   | 2 | 691.34  | 14.49  |
| P02936 OMPA_SALTY Outer membrane protein A           | 10 |                       | HFTLKSDVLFNFK                                     | 217 | 14 | 6  | 53.2  | b3b4b6°b6b10b11                   | 1709.89 | 86.795  | 14414  | 2 | 855.45  | -8.14  |
| P02936 OMPA_SALTY Outer membrane protein A           | 11 |                       | DGSVVVLGFTDRIGSDAYNQGLS<br>EK                     | 255 | 25 | 5  | 21.42 | b10b13y3y11y17                    | 2627.29 | 66.716  | 8158   | 4 | 657.58  | -1.21  |
| P02936 OMPA_SALTY Outer membrane protein A           | 12 | Carbamidomethyl+C(6)  | AALIDCLAPDRR                                      | 321 | 12 | 3  | 28.49 | y4y5y8                            | 1370.73 | 42.018  | 5599   | 3 | 457.58  | 4.81   |
| P02936 OMPA_SALTY Outer membrane protein A           | 13 |                       | ADTKSNVPGGPSTK                                    | 124 | 14 | 4  | 30.2  | b5y7y9y13                         | 1358.67 | 67.575  | 1981   | 2 | 679.84  | -12.94 |
| P02936 OMPA_SALTY Outer membrane protein A           | 14 |                       | IGSDAYNQGLSEKR                                    | 267 | 14 | 8  | 42.71 | b8b9y10°y10y12y13°y13*y<br>13     | 1537.76 | 118.521 | 1606   | 2 | 769.38  | -3.25  |
| Q7CPL7 RL17_SALTY 50S ribosomal protein L17          | 1  |                       | LFNELGPR                                          | 78  | 8  | 5  | 55.52 | y3y4y6y7y8                        | 945.50  | 55.854  | 161914 | 2 | 473.26  | -11.49 |
| Q7CPL7 RL17_SALTY 50S ribosomal protein L17          | 2  |                       | AGDNAPMAYIELVDR                                   | 103 | 15 | 8  | 41.4  | b4b5°b5y1y5y10y11y15              | 1634.79 | 79.277  | 58428  | 2 | 817.90  | 3.06   |
| Q7CPL7 RL17_SALTY 50S ribosomal protein L17          | 3  |                       | TRDNEIVAK                                         | 69  | 9  | 6  | 43.93 | b3b7b8y7°y7y9                     | 1045.55 | 42.117  | 14334  | 2 | 523.28  | -12.14 |
| Q7CPL7 RL17_SALTY 50S ribosomal protein L17          | 4  |                       | QAMFR                                             | 17  | 5  | 2  | 25.59 | b3y4                              | 652.32  | 32.136  | 4784   | 1 | 652.32  | -5.61  |
| Q7CPL7 RL17_SALTY 50S ribosomal protein L17          | 5  |                       | RVVEPLITLAK                                       | 45  | 11 | 5  | 54.09 | b3b4b6b8y5                        | 1238.78 | 63.151  | 161394 | 2 | 619.89  | -3.25  |
| Q7CPP7 RL21_SALTY 50S ribosomal protein L21          | 1  |                       | MYAVFQSGGK                                        | 0   | 10 | 6  | 50.63 | b2b3b5y4y5y8                      | 1087.52 | 53.167  | 91998  | 2 | 544.26  | -4.49  |
| Q7CPP7 RL21_SALTY 50S ribosomal protein L21          | 2  |                       | VSEGQTVR                                          | 13  | 8  | 4  | 47.5  | y3y5y7y8                          | 875.45  | 16.822  | 4432   | 2 | 438.23  | -7.25  |
| Q7CPP7 RL21_SALTY 50S ribosomal protein L21          | 3  |                       | YAVFQSGGK                                         | 1   | 9  | 3  | 29.37 | b5y3y8                            | 956.48  | 86.624  | 17637  | 1 | 956.48  | -9.00  |
| Q7CPP7 RL21_SALTY 50S ribosomal protein L21          | 4  | Oxidation+M(16)       | LDIATGETIEFAEVLMIANGEEVK                          | 24  | 24 | 5  | 22.25 | b8b10y6y12y14                     | 2608.27 | 76.290  | 10481  | 4 | 652.82  | -14.79 |

|                                                                                         |    |                                          |                                |     |    |    |       |                                  |         |         |       |   |         |        |
|-----------------------------------------------------------------------------------------|----|------------------------------------------|--------------------------------|-----|----|----|-------|----------------------------------|---------|---------|-------|---|---------|--------|
| Q9L6N1 METE_SALTY 5-methyltetrahydropteroyltriglutamate--homocysteine methyltransferase | 1  | Carbamidomethyl+C(11)                    | GMLTGPVTILCWSFPR               | 549 | 16 | 7  | 33.09 | b3b7b14y1y6y9y16                 | 1834.94 | 99.784  | 41802 | 2 | 917.97  | 4.32   |
| Q9L6N1 METE_SALTY 5-methyltetrahydropteroyltriglutamate--homocysteine methyltransferase | 2  |                                          | QAGIDLLPVGDFAWYDHVLTTSLLGNVPAR | 52  | 31 | 13 | 50.07 | b4b5°b5*b5b6°b6*b6y1y3y6y7y24y31 | 3351.78 | 119.824 | 35976 | 3 | 1117.93 | 2.77   |
| Q9L6N1 METE_SALTY 5-methyltetrahydropteroyltriglutamate--homocysteine methyltransferase | 3  | Carbamidomethyl+C(7)                     | LWVNPDCLK                      | 719 | 10 | 6  | 50.39 | y2y4y6y7y8y10                    | 1201.61 | 61.068  | 35259 | 2 | 601.31  | 1.42   |
| Q9L6N1 METE_SALTY 5-methyltetrahydropteroyltriglutamate--homocysteine methyltransferase | 4  |                                          | SDWDAYLEWGVEAFR                | 611 | 15 | 3  | 17.27 | b13y4y11                         | 1843.83 | 93.705  | 25296 | 3 | 615.28  | -0.53  |
| Q9L6N1 METE_SALTY 5-methyltetrahydropteroyltriglutamate--homocysteine methyltransferase | 5  |                                          | LAAITAQDSQRENPYEV              | 395 | 18 | 5  | 36.79 | b3b5b8y13y14                     | 2061.02 | 48.088  | 15951 | 3 | 687.68  | -6.16  |
| Q9L6N1 METE_SALTY 5-methyltetrahydropteroyltriglutamate--homocysteine methyltransferase | 6  |                                          | LAAITAQDSQR                    | 395 | 11 | 5  | 23.27 | b10y6y9°y9y11                    | 1173.61 | 49.311  | 11895 | 2 | 587.31  | -8.63  |
| Q9L6N1 METE_SALTY 5-methyltetrahydropteroyltriglutamate--homocysteine methyltransferase | 7  |                                          | WENTNYHYIVPEFSK                | 117 | 15 | 3  | 17.27 | b10y5y12                         | 1944.90 | 83.384  | 2435  | 3 | 648.97  | -14.31 |
| Q9L6N1 METE_SALTY 5-methyltetrahydropteroyltriglutamate--homocysteine methyltransferase | 8  | Carbamidomethyl+C(1)                     | CGELALLRDALNSGETAALEEWSAPIQAR  | 352 | 29 | 4  | 17.18 | b6b10b18y2                       | 3141.55 | 104.938 | 2216  | 5 | 629.12  | -4.51  |
| Q9L6N1 METE_SALTY 5-methyltetrahydropteroyltriglutamate--homocysteine methyltransferase | 9  | Carbamidomethyl+C(1)                     | CVKPPVIGDISRPAPITVEWAK         | 515 | 23 | 6  | 35.87 | b6b7b10y3y4°y4                   | 2532.36 | 76.327  | 34880 | 4 | 633.84  | -16.87 |
| Q9L6N1 METE_SALTY 5-methyltetrahydropteroyltriglutamate--homocysteine methyltransferase | 10 |                                          | GQQFR                          | 132 | 5  | 1  | 12.79 | b3                               | 635.32  | 42.825  | 14054 | 1 | 635.32  | -5.38  |
| Q9L6N1 METE_SALTY 5-methyltetrahydropteroyltriglutamate--homocysteine methyltransferase | 11 |                                          | DALNSGETAALEEWSAPIQAR          | 360 | 21 | 3  | 13.25 | b3b12y19                         | 2229.11 | 80.235  | 5473  | 3 | 743.71  | 12.81  |
| Q9L6N1 METE_SALTY 5-methyltetrahydropteroyltriglutamate--homocysteine methyltransferase | 12 | Carbamidomethyl+C(8)                     | ALWVASSCSLLHSPIDLSVETR         | 315 | 22 | 4  | 12.85 | b7y7y10°y10                      | 2441.25 | 98.219  | 2263  | 3 | 814.42  | 1.10   |
| Q9L6N1 METE_SALTY 5-methyltetrahydropteroyltriglutamate--homocysteine methyltransferase | 13 |                                          | RSDWDAYLEWGVEAFR               | 610 | 16 | 3  | 24.7  | y9y11y12                         | 1999.96 | 102.148 | 79052 | 3 | 667.32  | 12.94  |
| Q9L6N1 METE_SALTY 5-methyltetrahydropteroyltriglutamate--homocysteine methyltransferase | 14 | Carbamidomethyl+C(11)<br>;Oxidation+M(2) | GMLTGPVTILCWSFPR               | 549 | 16 | 4  | 23.01 | b5b11y3y9                        | 1850.92 | 115.083 | 4554  | 2 | 925.96  | -6.79  |
| Q9ZF60 GLTI_SALTY Glutamate/aartate periplasmic-binding protein                         | 1  |                                          | VVGYSQDYSNAIVEAVKK             | 61  | 18 | 11 | 38.79 | b1b2b6*b6b17y1y4y12y16y17y18     | 1970.00 | 63.641  | 85458 | 3 | 657.34  | -9.48  |
| Q9ZF60 GLTI_SALTY Glutamate/aartate periplasmic-binding protein                         | 2  |                                          | VVGYSQDYSNAIVEAVK              | 61  | 17 | 9  | 46.13 | b4b12y2y3y11y12*y12y13y17        | 1841.94 | 68.030  | 58186 | 2 | 921.47  | 4.04   |
| Q9ZF60 GLTI_SALTY Glutamate/aartate periplasmic-binding protein                         | 3  |                                          | AVAFMMDDALLAGER                | 198 | 15 | 9  | 66.69 | b5b6y3y4y8y10°y10y13y15          | 1609.78 | 84.475  | 53836 | 2 | 805.39  | 4.09   |
| Q9ZF60 GLTI_SALTY Glutamate/aartate periplasmic-binding protein                         | 4  |                                          | ESSVPFSYYDNQK                  | 47  | 14 | 3  | 18.37 | b11y6y10                         | 1691.76 | 55.863  | 50220 | 2 | 846.38  | 3.68   |
| Q9ZF60 GLTI_SALTY Glutamate/aartate periplasmic-binding protein                         | 5  | Carbamidomethyl+C(13)                    | IPLLQNGTDFECGSTTNNLER          | 98  | 22 | 5  | 21.6  | b10y2y9y10y22                    | 2526.20 | 81.682  | 10767 | 3 | 842.74  | 1.26   |

|                                                                 |    |                       |                                    |     |    |    |        |                                 |         |         |        |   |         |        |
|-----------------------------------------------------------------|----|-----------------------|------------------------------------|-----|----|----|--------|---------------------------------|---------|---------|--------|---|---------|--------|
| Q9ZF60 GLTI_SALTY Glutamate/aartate periplasmic-binding protein | 6  | Carbamidomethyl+C(19) | KPDNWEIVGK PQSQEAYGCMLR            | 217 | 22 | 5  | 25.91  | b4b12°b12y4y5                   | 2606.26 | 136.376 | 26261  | 3 | 869.43  | 5.25   |
| Q9ZF60 GLTI_SALTY Glutamate/aartate periplasmic-binding protein | 7  |                       | LTTAMLVMGLSAGLAHAEDGAP AAGSTLDK    | 5   | 30 | 3  | 21.72  | b9y11y12                        | 2869.50 | 137.196 | 2176   | 3 | 957.17  | 19.31  |
| Q9ZF60 GLTI_SALTY Glutamate/aartate periplasmic-binding protein | 8  | Carbamidomethyl+C(22) | LIPITSQNRIPLLQNGTFDFECGSTT NNLER   | 89  | 31 | 6  | 29.52  | b3y9y10y14y21y27                | 3548.79 | 86.883  | 111803 | 3 | 1183.60 | 3.65   |
| Q9ZF60 GLTI_SALTY Glutamate/aartate periplasmic-binding protein | 9  |                       | AVVVTSGTTSEILLHKLNEEQK             | 154 | 22 | 5  | 36.63  | b3y8y17y18y19                   | 2396.29 | 63.910  | 25268  | 3 | 799.43  | -6.93  |
| Q9ZF60 GLTI_SALTY Glutamate/aartate periplasmic-binding protein | 10 |                       | LMDDTIAQAQTSGEAEKWFDK              | 247 | 21 | 3  | 13.25  | b10b13y4                        | 2384.11 | 88.969  | 7697   | 4 | 596.78  | -0.72  |
| Q9ZF60 GLTI_SALTY Glutamate/aartate periplasmic-binding protein | 11 |                       | KLMDDTIAQAQTSGEAEK                 | 246 | 18 | 5  | 23.65  | b7b10b12y13*y13                 | 1935.92 | 108.850 | 2455   | 2 | 968.46  | -7.63  |
| Q9ZF60 GLTI_SALTY Glutamate/aartate periplasmic-binding protein | 12 | Oxidation+M(6)        | AVAFMMDDALLAGER                    | 198 | 15 | 4  | 28.14  | b3y3y7y10                       | 1625.76 | 42.942  | 6929   | 3 | 542.59  | -3.38  |
| P40810 ILVD_SALTY Dihydroxy-acid dehydratase                    | 1  |                       | AYASLATSADK                        | 594 | 11 | 14 | 110.04 | b1b2b3b5b6b7b8y2y3°y3y5y9y10y11 | 1097.56 | 35.161  | 18956  | 2 | 549.28  | 9.57   |
| P40810 ILVD_SALTY Dihydroxy-acid dehydratase                    | 2  |                       | LNPIVFVSGGPMMEAGK                  | 135 | 17 | 7  | 21.71  | b2b3*b3b16y6y14°y14             | 1728.94 | 89.626  | 12869  | 2 | 864.97  | 0.07   |
| P40810 ILVD_SALTY Dihydroxy-acid dehydratase                    | 3  |                       | VYESQDDAVEAILGGK                   | 453 | 16 | 3  | 16.33  | b12b15y11                       | 1693.83 | 74.901  | 8146   | 2 | 847.42  | 1.73   |
| P40810 ILVD_SALTY Dihydroxy-acid dehydratase                    | 4  |                       | EFNTIAVDDGIAMGHGGMLYSLP SR         | 72  | 25 | 5  | 34.25  | b4b5b9b11b13                    | 2651.24 | 128.929 | 2759   | 3 | 884.42  | -7.46  |
| P40810 ILVD_SALTY Dihydroxy-acid dehydratase                    | 5  | Carbamidomethyl+C(16) | DGGLAVLYGNFAENGCIK                 | 418 | 19 | 3  | 14.23  | b5b11y6                         | 1996.98 | 92.712  | 2470   | 3 | 666.33  | 1.96   |
| P40810 ILVD_SALTY Dihydroxy-acid dehydratase                    | 6  |                       | VVEGDVVVIR                         | 469 | 10 | 3  | 25.84  | b4b6y6                          | 1084.62 | 39.357  | 38480  | 2 | 542.81  | -16.09 |
| P40810 ILVD_SALTY Dihydroxy-acid dehydratase                    | 7  |                       | LDLVDAMIQGADPK                     | 161 | 14 | 4  | 23.81  | b13*b13y6y7                     | 1485.76 | 71.795  | 9993   | 3 | 495.93  | 1.31   |
| P40810 ILVD_SALTY Dihydroxy-acid dehydratase                    | 8  |                       | YEGPK                              | 479 | 5  | 1  | 12.79  | y3                              | 593.29  | 90.146  | 6409   | 1 | 593.29  | -8.85  |
| P40810 ILVD_SALTY Dihydroxy-acid dehydratase                    | 9  |                       | SLEYAYSK                           | 410 | 8  | 3  | 34.95  | b4b6y4                          | 960.45  | 44.005  | 4855   | 2 | 480.73  | -18.81 |
| P40810 ILVD_SALTY Dihydroxy-acid dehydratase                    | 10 |                       | GGPGMQEMLYPTSFLKSMGLGK             | 484 | 22 | 3  | 22.72  | b12b14b15                       | 2329.15 | 118.524 | 1615   | 2 | 1165.08 | 3.25   |
| P0A2F4 SODF_SALTY Superoxide dismutase [Fe]                     | 1  |                       | SFELPALPYAKDALAPHISAETLEY HYGK     | 1   | 29 | 8  | 48.79  | b4°b4y5y9y10y11y13y14           | 3231.64 | 81.491  | 33392  | 4 | 808.67  | 2.42   |
| P0A2F4 SODF_SALTY Superoxide dismutase [Fe]                     | 2  |                       | SFELPALPYAK                        | 1   | 11 | 7  | 50.62  | b2b3b6b9y4y7y11                 | 1235.66 | 79.254  | 22106  | 2 | 618.33  | -5.33  |
| P0A2F4 SODF_SALTY Superoxide dismutase [Fe]                     | 3  | Carbamidomethyl+C(22) | TSEGGIFNNAQVWNHTFYWNCL APNAGGEPTGK | 58  | 34 | 10 | 40.95  | b1b13°b13b14*b14y5y7y9y10y13    | 3708.72 | 96.822  | 18498  | 3 | 1236.91 | 7.64   |
| P0A2F4 SODF_SALTY Superoxide dismutase [Fe]                     | 4  |                       | GTAPEGK                            | 44  | 7  | 4  | 52.07  | b4b5y3y4                        | 709.35  | 42.923  | 5313   | 1 | 709.35  | 1.12   |
| P0A2F4 SODF_SALTY Superoxide dismutase [Fe]                     | 5  |                       | DALAPHISAETLEYHYGK                 | 12  | 18 | 5  | 31.15  | b6b7b10y6y10                    | 2014.95 | 104.885 | 1508   | 2 | 1007.98 | -20.48 |
| P0A2F4 SODF_SALTY Superoxide dismutase [Fe]                     | 6  |                       | SFELPALPYAKDALAPHISAETLEY HYGK     | 1   | 29 | 5  | 13.79  | b6b10°b10y3y10                  | 3231.68 | 94.796  | 3353   | 3 | 1077.90 | 14.13  |
| P0A2F4 SODF_SALTY Superoxide dismutase [Fe]                     | 7  | Phosphoryl STY(7)     | HHQTYVTNLNNLIK                     | 30  | 14 | 3  | 23.81  | b5_H3PO4 b5b6y10                | 1774.84 | 77.635  | 4723   | 3 | 592.29  | -6.47  |
| P0A6B1 ACP_SALTY Acyl carrier protein                           | 1  |                       | IIGQLGVK                           | 10  | 9  | 5  | 37.15  | b2y4y7y8y9                      | 956.57  | 49.756  | 119061 | 2 | 478.79  | -10.78 |
| P0A6B1 ACP_SALTY Acyl carrier protein                           | 2  |                       | MSTIEER                            | 0   | 7  | 7  | 55.08  | b2b3b4y2y3y6y7                  | 865.41  | 27.289  | 12050  | 2 | 433.21  | 5.92   |



|                                                    |    |                       |                                         |     |    |    |        |                                                  |         |         |        |   |         |        |
|----------------------------------------------------|----|-----------------------|-----------------------------------------|-----|----|----|--------|--------------------------------------------------|---------|---------|--------|---|---------|--------|
| [P0A6B1 ACP_SALTY Acyl carrier protein             | 3  |                       | ITTVQAIDYINGHQA                         | 62  | 16 | 5  | 40     | b5y3y8y11y14                                     | 1714.88 | 82.670  | 20902  | 2 | 857.94  | -0.21  |
| [Q7CPL4 RL16_SALTY 50S ribosomal protein L16       | 1  |                       | VLYEMDGVPEELAR                          | 100 | 14 | 19 | 170.12 | b2b4b5b8b10b13y2y4°y4y6y7y8y9y10y11°y11y12y13y14 | 1620.80 | 69.986  | 168772 | 2 | 810.91  | 5.57   |
| [Q7CPL4 RL16_SALTY 50S ribosomal protein L16       | 2  |                       | VLYEMDGVPEELAREAFK                      | 100 | 18 | 5  | 23.75  | b1b2b10b12b13                                    | 2096.06 | 110.212 | 2615   | 3 | 699.36  | 8.97   |
| [Q7CPL4 RL16_SALTY 50S ribosomal protein L16       | 3  |                       | GLAAGADVSGFSGLK                         | 18  | 16 | 7  | 36.2   | b5b8°b8b14b15°b15y11                             | 1496.74 | 58.377  | 23142  | 2 | 748.88  | -20.55 |
| [Q7CPL4 RL16_SALTY 50S ribosomal protein L16       | 4  |                       | AMTR                                    | 51  | 4  | 1  | 12.35  | b3                                               | 478.24  | 42.026  | 8159   | 1 | 478.24  | -13.02 |
| [P58661 AAT_SALTY Aartate aminotransferase         | 1  |                       | TAQTPGGTGALR                            | 96  | 12 | 4  | 25.26  | b3y7y8y12                                        | 1129.60 | 30.153  | 13812  | 2 | 565.30  | -0.76  |
| [P58661 AAT_SALTY Aartate aminotransferase         | 2  |                       | MFENITAAPADPILGLADLFR                   | 0   | 21 | 11 | 34.34  | b2b5b8b9°b9b13°b13°b13y1y3y13                    | 2275.15 | 120.891 | 6148   | 3 | 759.06  | -12.34 |
| [P58661 AAT_SALTY Aartate aminotransferase         | 3  |                       | ELIVASSYSK                              | 236 | 10 | 3  | 27.6   | b8b9y7                                           | 1096.60 | 69.847  | 34877  | 2 | 548.80  | 10.58  |
| [P58661 AAT_SALTY Aartate aminotransferase         | 4  |                       | EEFGVYAVASGR                            | 362 | 12 | 6  | 35.84  | b8y5°y5y7°y7y11                                  | 1284.60 | 127.273 | 1965   | 1 | 1284.60 | -15.96 |
| [P58661 AAT_SALTY Aartate aminotransferase         | 5  |                       | ANYSNPPAHGASIVATILSNDALR                | 280 | 24 | 4  | 15.94  | b14b16y5y16                                      | 2452.23 | 103.536 | 1575   | 2 | 1226.62 | -11.25 |
| [P58661 AAT_SALTY Aartate aminotransferase         | 6  |                       | RVWVSNPSPWPNHK                          | 121 | 13 | 6  | 32.7   | b4b7°b7°b7b10y3                                  | 1606.84 | 63.796  | 25163  | 3 | 536.29  | 11.09  |
| [P58661 AAT_SALTY Aartate aminotransferase         | 7  |                       | ELIVASSYSKNFGLYNER                      | 236 | 18 | 5  | 25.41  | b7y3y4y7°y7                                      | 2090.08 | 88.672  | 5302   | 2 | 1045.54 | 11.91  |
| [P58661 AAT_SALTY Aartate aminotransferase         | 8  | Carbamidomethyl+C(4)  | VGACTLVAADAETVDRAFSQMK                  | 254 | 22 | 4  | 12.85  | b18y8y10*y10                                     | 2340.13 | 68.397  | 2279   | 3 | 780.71  | -2.92  |
| [P58661 AAT_SALTY Aartate aminotransferase         | 9  | Carbamidomethyl+C(14) | NYLGIDGIPEFARCTQELLFGK                  | 63  | 22 | 3  | 19.37  | b3b6b11                                          | 2541.27 | 74.280  | 2023   | 2 | 1271.14 | -2.79  |
| [P58661 AAT_SALTY Aartate aminotransferase         | 10 | Phosphoryl STY(6)     | QLFVNTLQEK                              | 322 | 10 | 3  | 27.6   | b9y3y4                                           | 1299.61 | 73.065  | 6597   | 3 | 433.87  | -12.12 |
| [P37412 LEU3_SALTY 3-isopropylmalate dehydrogenase | 1  |                       | NIANPIAQILSLALLR                        | 293 | 17 | 13 | 70.67  | b1b2b3b4°b4b5b6b8y1y2y4y7y8                      | 1833.15 | 137.352 | 7990   | 2 | 917.08  | 7.19   |
| [P37412 LEU3_SALTY 3-isopropylmalate dehydrogenase | 2  |                       | ELTGGIYFGQPK                            | 138 | 12 | 7  | 32.83  | b3°b3b4°b4b7°b7y11                               | 1309.67 | 67.639  | 6328   | 2 | 655.34  | -4.10  |
| [P37412 LEU3_SALTY 3-isopropylmalate dehydrogenase | 3  |                       | TGDLAR                                  | 335 | 6  | 1  | 13.24  | y5                                               | 632.33  | 33.472  | 16120  | 1 | 632.33  | -9.36  |
| [P37412 LEU3_SALTY 3-isopropylmalate dehydrogenase | 4  |                       | ALEEGVR                                 | 328 | 7  | 4  | 49.06  | b4y4y5y6                                         | 773.41  | 27.306  | 5317   | 2 | 387.21  | -7.26  |
| [P37412 LEU3_SALTY 3-isopropylmalate dehydrogenase | 5  | Carbamidomethyl+C(12) | ADIAANGFDILCVR                          | 124 | 14 | 3  | 18.37  | b4y3y10                                          | 1534.77 | 76.653  | 4139   | 2 | 767.89  | 0.16   |
| [P37412 LEU3_SALTY 3-isopropylmalate dehydrogenase | 6  | Carbamidomethyl+C(6)  | ATVEGCEQADAILFGSVGGPK                   | 59  | 21 | 4  | 20.64  | b3y4y13y16                                       | 2106.05 | 101.760 | 2914   | 3 | 702.69  | 13.91  |
| [P37412 LEU3_SALTY 3-isopropylmalate dehydrogenase | 7  |                       | TYPDVELAHMYIDNATMQLIK                   | 214 | 21 | 3  | 13.25  | b5b12y13                                         | 2466.16 | 100.403 | 2741   | 2 | 1233.59 | -16.43 |
| [P37412 LEU3_SALTY 3-isopropylmalate dehydrogenase | 8  | Carbamidomethyl+C(6)  | ATVEGCEQADAILFGSVGGPKWE<br>NLPPEQPER    | 59  | 33 | 8  | 22.85  | b4°b4b29y3°y3y11°y11y12                          | 3568.74 | 115.619 | 5626   | 3 | 1190.25 | 10.54  |
| [P66692 RPIA_SALTY Ribose-5-phohate isomerase A    | 1  |                       | AVGWAALQYVQPGTIVGVGTGST<br>AAHFIDALGTMK | 8   | 35 | 8  | 25.31  | b5b7b11y4y17y25y28y35                            | 3487.81 | 107.991 | 58581  | 3 | 1163.27 | 0.84   |
| [P66692 RPIA_SALTY Ribose-5-phohate isomerase A    | 2  | Carbamidomethyl+C(3)  | FICIADASK                               | 112 | 9  | 5  | 29.37  | b2b7y5y7y9                                       | 1024.51 | 51.649  | 28278  | 2 | 512.76  | -4.89  |
| [P66692 RPIA_SALTY Ribose-5-phohate isomerase A    | 3  |                       | GADVALIGTPDGVK                          | 201 | 14 | 9  | 45.05  | b4b5°b5b6y1y2y3y7y14                             | 1312.71 | 57.730  | 25119  | 2 | 656.86  | -3.16  |
| [P66692 RPIA_SALTY Ribose-5-phohate isomerase A    | 4  |                       | FPLPVEVIPMAR                            | 128 | 12 | 3  | 21.29  | b6y4y7                                           | 1368.74 | 91.053  | 6765   | 2 | 684.87  | -22.21 |
| [P66692 RPIA_SALTY Ribose-5-phohate isomerase A    | 5  |                       | GQIEGAVSSSDASTEK                        | 43  | 16 | 6  | 42.87  | b4b6b7b9y4y9                                     | 1565.74 | 32.283  | 4720   | 2 | 783.37  | 5.22   |
| [P66692 RPIA_SALTY Ribose-5-phohate isomerase A    | 6  |                       | QVDILGKFLPVEVIPMAR                      | 121 | 19 | 3  | 21.19  | y4y7y9                                           | 2122.19 | 100.646 | 53705  | 3 | 708.07  | -7.13  |

|                                                                       |    |                       |                                      |     |    |    |       |                                             |         |         |       |   |         |        |
|-----------------------------------------------------------------------|----|-----------------------|--------------------------------------|-----|----|----|-------|---------------------------------------------|---------|---------|-------|---|---------|--------|
| P0A1R2 HIS6_SALTY Imidazole glycerol<br>phohate synthase subunit hisF | 1  | Carbamidomethyl+C(10) | VAEVIDIPFCVAGGIR                     | 68  | 16 | 4  | 16.33 | b5y1y9y11                                   | 1715.92 | 90.856  | 48001 | 2 | 858.46  | 0.57   |
| P0A1R2 HIS6_SALTY Imidazole glycerol<br>phohate synthase subunit hisF | 2  |                       | VTQWETLDWVQEVQQR                     | 153 | 16 | 9  | 49.78 | b9y1y2y3y5y6y9y11y16                        | 2045.02 | 84.447  | 42837 | 2 | 1023.02 | 7.70   |
| P0A1R2 HIS6_SALTY Imidazole glycerol<br>phohate synthase subunit hisF | 3  |                       | AYLAGQGVEIR                          | 245 | 11 | 7  | 51.08 | b2b3y5y7y8y9y11                             | 1176.63 | 51.801  | 42668 | 2 | 588.82  | -6.85  |
| P0A1R2 HIS6_SALTY Imidazole glycerol<br>phohate synthase subunit hisF | 4  | Carbamidomethyl+C(5)  | FGVQCIVVGIDTWFDATGK                  | 119 | 20 | 4  | 24.16 | b6b12b13y14                                 | 2228.11 | 91.494  | 12365 | 3 | 743.38  | 19.61  |
| P0A1R2 HIS6_SALTY Imidazole glycerol<br>phohate synthase subunit hisF | 5  |                       | SWVAR                                | 63  | 5  | 1  | 12.79 | y4                                          | 618.33  | 31.627  | 3300  | 1 | 618.33  | -9.28  |
| P0A1R2 HIS6_SALTY Imidazole glycerol<br>phohate synthase subunit hisF | 6  |                       | VPLIASGGAGTMEHFLEAFR                 | 201 | 20 | 5  | 26.49 | b3b12y4y8y10                                | 2103.05 | 61.763  | 2752  | 4 | 526.52  | -10.68 |
| P0A1R2 HIS6_SALTY Imidazole glycerol<br>phohate synthase subunit hisF | 7  |                       | ILSFGADKISINSPALADPTLITR             | 91  | 24 | 4  | 22.5  | b13y6y7y11                                  | 2513.39 | 84.634  | 63108 | 3 | 838.47  | -2.43  |
| P0A1R2 HIS6_SALTY Imidazole glycerol<br>phohate synthase subunit hisF | 8  |                       | GAGEIVLNMNMNQDGVNRNGYDLT<br>QLK      | 169 | 25 | 4  | 22.42 | b7b10b11°b11                                | 2736.37 | 84.342  | 4751  | 3 | 912.80  | 9.55   |
| P0A1R2 HIS6_SALTY Imidazole glycerol<br>phohate synthase subunit hisF | 9  | Carbamidomethyl+C(3)  | DVCRVPLIASGGAGTMEHFLEAFR             | 197 | 24 | 5  | 12.2  | b3y9°y9y13°y13                              | 2633.30 | 112.633 | 3587  | 2 | 1317.15 | 1.67   |
| P0A1R2 HIS6_SALTY Imidazole glycerol<br>phohate synthase subunit hisF | 10 | Oxidation+M(9)        | GAGEIVLNMNMNQDGVR                    | 169 | 16 | 6  | 27.08 | b3y6°y6y7°y7y10                             | 1719.80 | 72.013  | 6168  | 3 | 573.94  | -7.03  |
| P16326 FLGL_SALTY Flagellar hook-<br>associated protein 3             | 1  |                       | LQMSNLVDVDWNSVISSYVMQQ<br>AALQASYK   | 272 | 30 | 16 | 63.19 | b4b6°b6b7°b7b8°b8y1y3y4<br>°y4y8°y8y9°y9°y9 | 3388.67 | 136.340 | 12825 | 3 | 1130.23 | 5.26   |
| P16326 FLGL_SALTY Flagellar hook-<br>associated protein 3             | 2  |                       | YIFAGYK                              | 133 | 7  | 4  | 39.27 | b2b5y3y6                                    | 861.44  | 28.281  | 2274  | 2 | 431.22  | -11.62 |
| P16326 FLGL_SALTY Flagellar hook-<br>associated protein 3             | 3  |                       | VTNPSDDPIAASQAVVLSQAQAQ<br>NSQYALAR  | 35  | 31 | 5  | 13.2  | b11°b11b16y7y10                             | 3213.61 | 125.123 | 14468 | 3 | 1071.88 | -0.38  |
| P16326 FLGL_SALTY Flagellar hook-<br>associated protein 3             | 4  |                       | AELGTQLSELSTLDSLGS DR                | 247 | 20 | 4  | 13.7  | b11°b11b14y3                                | 2092.06 | 88.392  | 2897  | 3 | 698.03  | 11.09  |
| P16326 FLGL_SALTY Flagellar hook-<br>associated protein 3             | 5  |                       | TFATQK                               | 66  | 6  | 3  | 13.24 | y5°y5°y5                                    | 695.36  | 36.088  | 2459  | 1 | 695.36  | -14.92 |
| P16326 FLGL_SALTY Flagellar hook-<br>associated protein 3             | 6  |                       | TEAAPFDQATGGYHGGEK                   | 140 | 18 | 4  | 23.65 | b12y4y9y12                                  | 1835.86 | 50.057  | 2055  | 3 | 612.62  | 21.94  |
| P16326 FLGL_SALTY Flagellar hook-<br>associated protein 3             | 7  |                       | TEAAPFDQATGGYHGGEKSVTQQ<br>VDSAR     | 140 | 28 | 3  | 21.57 | b4b5y15                                     | 2907.37 | 112.615 | 10440 | 3 | 969.80  | 7.98   |
| P16326 FLGL_SALTY Flagellar hook-<br>associated protein 3             | 8  |                       | LGEQMSTGKR                           | 25  | 10 | 4  | 25.84 | b3°b3b9y6                                   | 1106.57 | 35.256  | 7003  | 2 | 553.79  | 8.16   |
| P16326 FLGL_SALTY Flagellar hook-<br>associated protein 3             | 9  | Phosphoryl.STY(9)     | VSLEESVLSQVTTAIQTAEK                 | 72  | 21 | 5  | 28.28 | b6b7b10y3y6                                 | 2341.15 | 73.147  | 7563  | 3 | 781.05  | 1.04   |
| P16326 FLGL_SALTY Flagellar hook-<br>associated protein 3             | 10 | Phosphoryl.STY(8)     | NSLNNVLTVR                           | 237 | 10 | 5  | 37.84 | b3°b3b7y4y9                                 | 1209.61 | 66.320  | 4015  | 2 | 605.31  | 13.42  |
| Q9L6M9 DLHH_SALTY Putative<br>carboxymethylenebutenolidase            | 1  |                       | HPVDIATDLNAPVLGLYGQDTSI<br>PQESVETMR | 183 | 33 | 3  | 16.69 | y6y10y16                                    | 3523.70 | 90.274  | 38703 | 4 | 881.68  | -10.88 |
| Q9L6M9 DLHH_SALTY Putative<br>carboxymethylenebutenolidase            | 2  |                       | VPDSQVLADLDHVASWASR                  | 114 | 19 | 5  | 27.85 | b3b6b10y5y8                                 | 2066.02 | 84.441  | 23340 | 3 | 689.34  | -6.74  |
| Q9L6M9 DLHH_SALTY Putative<br>carboxymethylenebutenolidase            | 3  |                       | AAVAWYGK                             | 164 | 8  | 5  | 34.95 | b1b3b8y4y7                                  | 865.45  | 36.073  | 8375  | 2 | 433.23  | -12.69 |
| Q9L6M9 DLHH_SALTY Putative<br>carboxymethylenebutenolidase            | 4  |                       | MLEWFAQYGGK                          | 257 | 11 | 6  | 49.08 | y3y6y8y9°y9y11                              | 1329.64 | 79.645  | 5656  | 2 | 665.32  | 7.53   |

|                                                         |    |                                          |                                                         |     |    |    |       |                               |         |         |        |   |         |        |
|---------------------------------------------------------|----|------------------------------------------|---------------------------------------------------------|-----|----|----|-------|-------------------------------|---------|---------|--------|---|---------|--------|
| Q9L6M9 DLHH_SALTY Putative carboxymethylenebutenolidase | 5  |                                          | ITWLYAAHNPQLK                                           | 151 | 13 | 5  | 34.16 | b8°b8b9°b9b10                 | 1554.86 | 110.817 | 35170  | 2 | 777.93  | 12.40  |
| Q9L6M9 DLHH_SALTY Putative carboxymethylenebutenolidase | 6  |                                          | LALEGYLAIAPELYFR                                        | 78  | 16 | 4  | 16.33 | b5b8°b8y13                    | 1838.96 | 109.525 | 12353  | 2 | 919.99  | -22.10 |
| Q9L6M9 DLHH_SALTY Putative carboxymethylenebutenolidase | 7  |                                          | TTTHPSGFAPAASPLAPTMHTPD<br>GAISAGITSIPSGDDMPAYYARP<br>K | 1   | 49 | 9  | 27.24 | b7b16y6y8y10y12°y12y15y<br>19 | 4965.37 | 78.634  | 9745   | 5 | 993.88  | -10.62 |
| Q9L6M9 DLHH_SALTY Putative carboxymethylenebutenolidase | 8  |                                          | VPDSQVLADLDHVASWASRNGG<br>DAHR                          | 114 | 26 | 4  | 11.72 | b9°b9b14y13                   | 2773.38 | 129.541 | 3135   | 3 | 925.13  | 12.59  |
| Q9L6M9 DLHH_SALTY Putative carboxymethylenebutenolidase | 9  |                                          | MLEWFAQYGGKK                                            | 257 | 12 | 4  | 30.77 | b3b5y7y9                      | 1457.71 | 75.075  | 2895   | 2 | 729.36  | -8.46  |
| Q9L6M9 DLHH_SALTY Putative carboxymethylenebutenolidase | 10 | Phosphoryl STY(21)                       | AEIVVYPDAGHAFNADYRPGYHE<br>ASAKDGWQR                    | 225 | 32 | 8  | 27.38 | b3b12b14y4°y4y10y11°y1<br>1   | 3670.69 | 104.648 | 2169   | 3 | 1224.23 | 12.44  |
| Q9L6M9 DLHH_SALTY Putative carboxymethylenebutenolidase | 11 |                                          | HPVDIATDLNAPVLGLYGGQDTSI<br>PQES                        | 183 | 28 | 6  | 38.59 | y4y7y13y14y15°y15             | 2907.44 | 90.240  | 15950  | 3 | 969.82  | 0.92   |
| P61179 RL22_SALTY 50S ribosomal protein L22             | 1  |                                          | IFVDEGPSMK                                              | 73  | 10 | 7  | 66.2  | b2y4y5y6y8y9y10               | 1122.54 | 51.667  | 93799  | 2 | 561.78  | -4.78  |
| P61179 RL22_SALTY 50S ribosomal protein L22             | 2  |                                          | IFVDEGPSMKR                                             | 73  | 11 | 4  | 30.26 | y1y5y7y8                      | 1278.64 | 46.149  | 83852  | 3 | 426.88  | -12.60 |
| P61179 RL22_SALTY 50S ribosomal protein L22             | 3  |                                          | LVADLIR                                                 | 18  | 7  | 5  | 61.85 | b4y3y4y5y6                    | 799.49  | 57.886  | 110717 | 2 | 400.25  | -19.77 |
| P61179 RL22_SALTY 50S ribosomal protein L22             | 4  |                                          | VLESAIANAEHNDGADIDDLK                                   | 49  | 21 | 7  | 25.27 | b8b11b15°b15y6°y6y15          | 2210.05 | 103.700 | 2960   | 4 | 553.27  | -4.86  |
| P61179 RL22_SALTY 50S ribosomal protein L22             | 5  |                                          | ETIAK                                                   | 1   | 5  | 1  | 12.79 | y3                            | 561.32  | 25.370  | 2674   | 1 | 561.32  | -4.57  |
| P61179 RL22_SALTY 50S ribosomal protein L22             | 6  |                                          | METIAK                                                  | 0   | 6  | 2  | 26.03 | b3y3                          | 692.36  | 25.374  | 1972   | 1 | 692.36  | -7.41  |
| P61179 RL22_SALTY 50S ribosomal protein L22             | 7  | Phosphoryl STY(9)                        | VSQALDILTYTNK                                           | 28  | 13 | 7  | 39.54 | b3°b3b5°b5y3y4_H3PO4<br>y4y12 | 1545.75 | 70.843  | 3094   | 2 | 773.38  | 0.87   |
| P61179 RL22_SALTY 50S ribosomal protein L22             | 8  | Oxidation+M(9)                           | IFVDEGPSMK                                              | 73  | 10 | 6  | 25.84 | b4°b4b6°b6y5°y5               | 1138.54 | 136.332 | 1976   | 1 | 1138.54 | -4.93  |
| P61179 RL22_SALTY 50S ribosomal protein L22             | 9  |                                          | FVDEGPSMKR                                              | 74  | 10 | 0  | 2.67  |                               | 1165.56 | 46.111  | 11439  | 2 | 583.29  | -3.04  |
| P37418 MENE_SALTY 2-succinylbenzoate--CoA ligase        | 1  |                                          | LNDEVLSWR                                               | 22  | 9  | 10 | 59.73 | b1b2b5°b5b6b7b8y8y9°y9        | 1131.59 | 72.067  | 20447  | 2 | 566.30  | 7.98   |
| P37418 MENE_SALTY 2-succinylbenzoate--CoA ligase        | 2  |                                          | LIPLVNDEGWFATRDR                                        | 321 | 16 | 6  | 36.2  | b12y6y11y12y14y16             | 1901.97 | 86.476  | 14292  | 2 | 951.49  | -8.15  |
| P37418 MENE_SALTY 2-succinylbenzoate--CoA ligase        | 3  | Carbamidomethyl+C(11)                    | TLLAWLALMQCGAR                                          | 64  | 14 | 7  | 42.71 | b2°b2b12b13y3y4y10            | 1603.87 | 99.815  | 13231  | 2 | 802.44  | 13.93  |
| P37418 MENE_SALTY 2-succinylbenzoate--CoA ligase        | 4  |                                          | AASMAEGYWR                                              | 308 | 10 | 3  | 25.84 | b3b8y6                        | 1141.53 | 27.338  | 13825  | 2 | 571.27  | 21.92  |
| P37418 MENE_SALTY 2-succinylbenzoate--CoA ligase        | 5  |                                          | EFGHRPVAVVEYASQAGDVNLAE<br>WVR                          | 388 | 26 | 4  | 17.86 | y5y7°y7y9                     | 2899.50 | 122.896 | 6163   | 3 | 967.17  | 17.77  |
| P37418 MENE_SALTY 2-succinylbenzoate--CoA ligase        | 6  |                                          | LVSMTLTSGSTGLPK                                         | 135 | 15 | 4  | 28.14 | b11b13b14y14                  | 1491.78 | 97.697  | 5040   | 3 | 497.93  | -20.46 |
| P37418 MENE_SALTY 2-succinylbenzoate--CoA ligase        | 7  |                                          | LDNLFFSGGEGIQPEEVER                                     | 350 | 19 | 5  | 19.56 | b14b16y11°y11y13              | 2136.03 | 60.431  | 2574   | 3 | 712.68  | 4.91   |
| P37418 MENE_SALTY 2-succinylbenzoate--CoA ligase        | 8  |                                          | AGNQPR                                                  | 58  | 6  | 1  | 13.24 | b5                            | 642.33  | 20.874  | 2138   | 1 | 642.33  | -7.13  |
| P37418 MENE_SALTY 2-succinylbenzoate--CoA ligase        | 9  |                                          | STAAYAVAWQPQR                                           | 122 | 13 | 4  | 28.93 | b4b7b10°b10                   | 1448.75 | 122.749 | 2067   | 1 | 1448.75 | 18.54  |
| P37418 MENE_SALTY 2-succinylbenzoate--CoA ligase        | 10 |                                          | WLTMPSELKNGGIK                                          | 425 | 14 | 3  | 18.37 | b6b8y4                        | 1573.83 | 52.849  | 3408   | 2 | 787.42  | -6.67  |
| P37418 MENE_SALTY 2-succinylbenzoate--CoA ligase        | 11 | Carbamidomethyl+C(10)<br>;Oxidation+M(6) | QPLEQMLAGCTHASLVPTQLWR                                  | 208 | 22 | 4  | 23.21 | b4b14b15y18                   | 2552.24 | 78.562  | 4696   | 3 | 851.42  | -14.16 |
| P37418 MENE_SALTY 2-succinylbenzoate--CoA ligase        | 12 |                                          | PLVNDEGWFATRDR                                          | 323 | 14 | 2  | 13.95 | b5b7                          | 1675.81 | 86.555  | 11125  | 3 | 559.28  | -2.77  |

|                                                  |    |                                             |                                     |     |    |   |       |                        |         |         |       |   |         |        |
|--------------------------------------------------|----|---------------------------------------------|-------------------------------------|-----|----|---|-------|------------------------|---------|---------|-------|---|---------|--------|
| P37418 MENE_SALTY 2-succinylbenzoate--CoA ligase | 13 | Carbamidomethyl+C(7)                        | WLALMQCGAR                          | 68  | 10 | 0 | 4     |                        | 1205.59 | 99.906  | 11040 | 1 | 1205.59 | -4.15  |
| P41782 HILD_SALTY Transcriptional regulator hiiD | 1  |                                             | IGNHNVNAVALK                        | 267 | 12 | 7 | 32.83 | b2b4b8b9y2y11y12       | 1249.71 | 61.030  | 62979 | 2 | 625.36  | 10.55  |
| P41782 HILD_SALTY Transcriptional regulator hiiD | 2  | Carbamidomethyl+C(12)                       | LTISNNHDTIYCDEPGMLVLKK              | 59  | 22 | 4 | 22.72 | y11y13y14y22           | 2561.25 | 136.709 | 6320  | 2 | 1281.13 | -7.63  |
| P41782 HILD_SALTY Transcriptional regulator hiiD | 3  | Carbamidomethyl+C(12)                       | LTISNNHDTIYCDEPGMLVLK               | 59  | 21 | 3 | 13.25 | b9b11y3                | 2433.21 | 99.396  | 3937  | 3 | 811.74  | 11.44  |
| P41782 HILD_SALTY Transcriptional regulator hiiD | 4  | Carbamidomethyl+C(1); Carbamidomethyl+C(12) | CGYDSTSFIQCFC                       | 279 | 14 | 4 | 33.94 | y6*y6y7y8              | 1775.76 | 70.465  | 2498  | 4 | 444.70  | 11.76  |
| P41782 HILD_SALTY Transcriptional regulator hiiD | 5  |                                             | EVFEHLK                             | 143 | 7  | 3 | 39.27 | b4b6y4                 | 901.48  | 28.240  | 1915  | 2 | 451.24  | -2.30  |
| P41782 HILD_SALTY Transcriptional regulator hiiD | 6  |                                             | MENVTFVSNShQRPAADNLQK               | 0   | 21 | 4 | 22.9  | y4y11*y11y12           | 2386.13 | 92.760  | 79221 | 3 | 796.05  | -12.89 |
| P41782 HILD_SALTY Transcriptional regulator hiiD | 7  |                                             | LAEEGTSFSDIYLSAR                    | 242 | 16 | 9 | 66.54 | b3b4b8b10b13y3*y3y7y9  | 1758.89 | 82.534  | 26588 | 2 | 879.95  | 18.39  |
| P41782 HILD_SALTY Transcriptional regulator hiiD | 8  | Carbamidomethyl+C(11)                       | NLYVSSFTLVCFR                       | 43  | 13 | 4 | 33.06 | b5b6y7y9               | 1605.81 | 122.822 | 2809  | 2 | 803.41  | -1.06  |
| P41782 HILD_SALTY Transcriptional regulator hiiD | 9  |                                             | VYNISSSPSRQWK                       | 210 | 14 | 5 | 18.37 | b8*b8y8*y8y10          | 1664.86 | 101.696 | 57874 | 3 | 555.62  | -11.95 |
| P41782 HILD_SALTY Transcriptional regulator hiiD | 10 | Carbamidomethyl+C(12)                       | EVFEHLKTAFSCTK                      | 143 | 14 | 3 | 18.37 | b3b5y5                 | 1696.82 | 71.842  | 24247 | 2 | 848.91  | -8.63  |
| P41782 HILD_SALTY Transcriptional regulator hiiD | 11 |                                             | ENVTFVSNShQRPAADNLQKLK              | 1   | 22 | 6 | 42.2  | b4b8*b8b9b10b13        | 2496.30 | 89.161  | 23831 | 3 | 832.77  | 0.98   |
| P41782 HILD_SALTY Transcriptional regulator hiiD | 12 | Carbamidomethyl+C(11)                       | NLYVSSFTLVCFRSGK                    | 43  | 16 | 3 | 16.33 | b8y10y12               | 1877.94 | 110.471 | 5585  | 2 | 939.47  | -9.56  |
| P41782 HILD_SALTY Transcriptional regulator hiiD | 13 |                                             | QWKLTDVADHIFMSTSTLK                 | 221 | 19 | 6 | 14.23 | b6*b6*b6b9y7*y7        | 2221.11 | 136.326 | 5340  | 2 | 1111.06 | -12.20 |
| P41782 HILD_SALTY Transcriptional regulator hiiD | 14 |                                             | TTPSTFIKMANH                        | 297 | 12 | 3 | 21.29 | b4b7y8                 | 1347.67 | 83.391  | 2003  | 2 | 674.34  | -3.26  |
| P41782 HILD_SALTY Transcriptional regulator hiiD | 15 | Carbamidomethyl+C(12)                       | LTISNNHDTIYCDEP                     | 59  | 15 | 1 | 8.05  | y11                    | 1791.81 | 136.724 | 3063  | 1 | 1791.81 | 12.47  |
| Q7CR87 SURA_SALTY Chaperone surA                 | 1  |                                             | IQELPGIFAQALSTAK                    | 235 | 16 | 7 | 22.86 | b1b3*b3b4y1y2y12       | 1686.94 | 90.064  | 37265 | 2 | 843.97  | -2.97  |
| Q7CR87 SURA_SALTY Chaperone surA                 | 2  |                                             | LNAGQAGQQLPDDATLR                   | 50  | 17 | 6 | 26.18 | b9y4y10*y10y11y17      | 1767.90 | 51.345  | 12413 | 2 | 884.46  | 3.52   |
| Q7CR87 SURA_SALTY Chaperone surA                 | 3  |                                             | QIGTQNDASTELNLSHILALPENP TSEQVNDAGR | 162 | 35 | 7 | 29.55 | y6y8y9*y9y12y14y35     | 3816.91 | 88.711  | 9812  | 3 | 1272.97 | 2.43   |
| Q7CR87 SURA_SALTY Chaperone surA                 | 4  |                                             | LAYDGLNYSTYR                        | 117 | 12 | 7 | 47.84 | b1b6b7b9*b9b11y3       | 1435.69 | 82.404  | 3216  | 2 | 718.35  | 1.79   |
| Q7CR87 SURA_SALTY Chaperone surA                 | 5  |                                             | VAAVVNNGVVLESVDGLMQSV K             | 27  | 23 | 3 | 12.5  | b4b8y10                | 2343.22 | 91.062  | 6406  | 2 | 1172.11 | -2.29  |
| Q7CR87 SURA_SALTY Chaperone surA                 | 6  |                                             | GQSQSISVTEVHAR                      | 274 | 14 | 4 | 18.37 | b9b12*b12y5            | 1498.76 | 56.468  | 5558  | 2 | 749.88  | -0.98  |
| Q7CR87 SURA_SALTY Chaperone surA                 | 7  |                                             | QAESIVEEAR                          | 197 | 10 | 3 | 25.84 | b4b6y9                 | 1131.54 | 119.790 | 1503  | 1 | 1131.54 | -17.26 |
| Q7CR87 SURA_SALTY Chaperone surA                 | 8  |                                             | LAITYSADQQALKGGQMGWGR               | 214 | 21 | 7 | 40.13 | b11*b11y9y10*y10y12y13 | 2251.16 | 112.400 | 3918  | 2 | 1126.08 | 14.75  |
| Q7CR87 SURA_SALTY Chaperone surA                 | 9  |                                             | NGADFGKLAITYSADQQALK                | 207 | 20 | 4 | 13.7  | b9b13*b13y12           | 2111.07 | 104.752 | 2102  | 2 | 1056.04 | -2.78  |
| Q7CPE1 ATPA_SALTY ATP synthase subunit alpha     | 1  |                                             | MQLNSTEISELIK                       | 0   | 13 | 8 | 52.54 | b2b3b9b12y3y10y11y13   | 1505.79 | 76.919  | 57800 | 2 | 753.40  | -0.08  |
| Q7CPE1 ATPA_SALTY ATP synthase subunit alpha     | 2  |                                             | AVDSMIPIGR                          | 151 | 10 | 6 | 53.4  | b1y4y5y7y8y10          | 1058.55 | 60.332  | 52852 | 2 | 529.78  | -11.19 |
| Q7CPE1 ATPA_SALTY ATP synthase subunit alpha     | 3  | Carbamidomethyl+C(7)                        | IHGLADCMQGEMISLPGNR                 | 40  | 19 | 7 | 14.23 | b2b7*b7y4*y4y6y19      | 2098.97 | 69.860  | 48346 | 3 | 700.33  | -4.42  |
| Q7CPE1 ATPA_SALTY ATP synthase subunit alpha     | 4  |                                             | GYLADVELAK                          | 453 | 10 | 5 | 40.61 | b2y2y3y6y9             | 1078.57 | 61.053  | 37726 | 2 | 539.79  | -11.43 |

|                                                            |    |                                           |                                               |     |    |    |       |                                           |         |         |       |   |         |        |
|------------------------------------------------------------|----|-------------------------------------------|-----------------------------------------------|-----|----|----|-------|-------------------------------------------|---------|---------|-------|---|---------|--------|
| Q7CPE1 ATPA_SALTY ATP synthase subunit alpha               | 5  |                                           | ILEVPVGR                                      | 93  | 8  | 5  | 34.95 | b3y2y4y6y8                                | 882.53  | 53.056  | 35146 | 2 | 441.77  | -13.07 |
| Q7CPE1 ATPA_SALTY ATP synthase subunit alpha               | 6  |                                           | QYAPMSVAQQLVLFAAER                            | 434 | 19 | 3  | 22.01 | b3y5y6                                    | 2109.09 | 93.285  | 30954 | 2 | 1055.05 | 5.67   |
| Q7CPE1 ATPA_SALTY ATP synthase subunit alpha               | 7  |                                           | DSVGAVVMGPYADLAEGMK                           | 68  | 19 | 4  | 14.23 | b6b11y2y12                                | 1909.92 | 83.597  | 29504 | 2 | 955.46  | 9.40   |
| Q7CPE1 ATPA_SALTY ATP synthase subunit alpha               | 8  |                                           | QSVDQPVTGYK                                   | 139 | 12 | 4  | 28.49 | y7y9y10y12                                | 1349.67 | 34.642  | 20963 | 2 | 675.34  | -0.45  |
| Q7CPE1 ATPA_SALTY ATP synthase subunit alpha               | 9  |                                           | ELAAFSQFASDLDDATR                             | 401 | 17 | 6  | 21.71 | b8b10°b10y4y13y17                         | 1856.88 | 88.795  | 20933 | 2 | 928.94  | 5.65   |
| Q7CPE1 ATPA_SALTY ATP synthase subunit alpha               | 10 |                                           | RPPGREAFPGDVFYLHSR                            | 278 | 18 | 3  | 23.75 | y5y10y11                                  | 2101.09 | 79.574  | 1661  | 2 | 1051.05 | 8.71   |
| Q7CPE1 ATPA_SALTY ATP synthase subunit alpha               | 11 |                                           | TALAIDAIINQR                                  | 175 | 12 | 4  | 32.83 | b7y4y7y8                                  | 1298.73 | 74.178  | 30139 | 2 | 649.87  | -6.11  |
| Q7CPE1 ATPA_SALTY ATP synthase subunit alpha               | 12 |                                           | VNADYVEAFTK                                   | 303 | 11 | 4  | 33.85 | b3b8y4y6                                  | 1256.64 | 27.330  | 29511 | 3 | 419.55  | 21.66  |
| Q7CPE1 ATPA_SALTY ATP synthase subunit alpha               | 13 |                                           | GLLGR                                         | 101 | 5  | 2  | 25.59 | b4y3                                      | 515.33  | 74.130  | 11210 | 1 | 515.33  | -9.00  |
| Q7CPE1 ATPA_SALTY ATP synthase subunit alpha               | 14 |                                           | GEDALIYDDLK                                   | 252 | 13 | 3  | 19.69 | b5b8y7                                    | 1451.69 | 68.581  | 3610  | 3 | 484.57  | -21.95 |
| Q7CPE1 ATPA_SALTY ATP synthase subunit alpha               | 15 |                                           | VVNTLGAPIDGKGPVDNDGFSAV<br>EAIAPGVIDR         | 106 | 33 | 14 | 61.08 | b4°b4b5°b5°b5b27y5y6°y6<br>y7y10y13y17y28 | 3263.70 | 84.156  | 41191 | 3 | 1088.57 | 3.82   |
| Q7CPE1 ATPA_SALTY ATP synthase subunit alpha               | 16 |                                           | EAFPGDVFYLHSRLLER                             | 283 | 17 | 3  | 22.93 | b4b9b11                                   | 2049.05 | 71.467  | 3425  | 3 | 683.69  | -4.41  |
| Q7CPE1 ATPA_SALTY ATP synthase subunit alpha               | 17 |                                           | VNADYVEAFTKGEVK                               | 303 | 15 | 4  | 17.27 | b3b13°b13y11                              | 1669.84 | 78.670  | 3318  | 2 | 835.43  | 1.02   |
| Q7CPE1 ATPA_SALTY ATP synthase subunit alpha               | 18 | Phosphoryl.STY(8)                         | QLNSTEISELIK                                  | 1   | 12 | 4  | 38.85 | b7y5y6y7                                  | 1454.70 | 39.185  | 4732  | 2 | 727.85  | -6.29  |
| Q7CPE1 ATPA_SALTY ATP synthase subunit alpha               | 19 | Carbamidomethyl+C(32)<br>;Oxidation+M(34) | LEEHGALANTIVVVATASESAALQ<br>YLAPYAGCAMGEYFRDR | 211 | 41 | 12 | 57.9  | b4b8°b8b9b10°b10y4°y4y5<br>y6°y6y19       | 4431.20 | 136.249 | 6852  | 5 | 887.05  | 13.88  |
| Q7CPE1 ATPA_SALTY ATP synthase subunit alpha               | 20 | Oxidation+M(8)                            | DSVGAVVMGPYADLAEGMK                           | 68  | 19 | 6  | 30.07 | b5°b5b12y10y12y13                         | 1925.90 | 66.689  | 3299  | 2 | 963.45  | -0.51  |
| Q7CPE1 ATPA_SALTY ATP synthase subunit alpha               | 21 |                                           | DSMIPGR                                       | 153 | 8  | 0  | 2.22  |                                           | 888.47  | 60.347  | 10081 | 2 | 444.74  | 15.04  |
| P06202 OPPA_SALTY Periplasmic oligopeptide-binding protein | 1  |                                           | AEQQLDKDSAIVPVYYYVNAR                         | 494 | 21 | 9  | 25.27 | b4b11°b11y1y5y7°y7y9y2<br>1               | 2442.22 | 73.205  | 30072 | 3 | 814.75  | -2.90  |
| P06202 OPPA_SALTY Periplasmic oligopeptide-binding protein | 2  |                                           | LADPNTASPYASYLQYGHIANIDD<br>IAGKKPATDLGVK     | 125 | 38 | 5  | 16.54 | b6b8b11°b11°b11                           | 4001.04 | 83.371  | 22774 | 4 | 1001.02 | -6.59  |
| P06202 OPPA_SALTY Periplasmic oligopeptide-binding protein | 3  |                                           | TVINQVTYLPISSEVTDVNR                          | 241 | 20 | 10 | 70.24 | b4y3y5y6y10y11°y11y13y1<br>4y20           | 2248.18 | 77.116  | 19413 | 2 | 1124.59 | -0.22  |
| P06202 OPPA_SALTY Periplasmic oligopeptide-binding protein | 4  |                                           | NLGVNVNLENQEWK                                | 410 | 14 | 5  | 29.41 | b12y3°y3y4y6                              | 1656.84 | 67.068  | 15322 | 2 | 828.92  | 2.36   |
| P06202 OPPA_SALTY Periplasmic oligopeptide-binding protein | 5  |                                           | LLAEAGFTADKPLTFDLLYNTSDL<br>HK                | 372 | 26 | 7  | 26.38 | b9b11b15y7°y7y9y12                        | 2893.46 | 116.467 | 5284  | 3 | 965.16  | -13.84 |
| P06202 OPPA_SALTY Periplasmic oligopeptide-binding protein | 6  |                                           | LVEPEWFK                                      | 352 | 8  | 3  | 39.72 | y3y4y5                                    | 1047.54 | 71.423  | 29549 | 2 | 524.28  | -7.81  |
| P06202 OPPA_SALTY Periplasmic oligopeptide-binding protein | 7  |                                           | DSAIVPVYYYVNAR                                | 501 | 14 | 4  | 30.2  | b3b5b8y5                                  | 1629.83 | 93.910  | 22114 | 2 | 815.42  | 4.49   |
| P06202 OPPA_SALTY Periplasmic oligopeptide-binding protein | 8  | Carbamidomethyl+C(4)                      | AGWCADYNEPTSLNTMLSDSSN<br>NTAHYK              | 439 | 29 | 6  | 24.08 | y6°y6°y6y8y10y13                          | 3294.42 | 90.269  | 21991 | 3 | 1098.81 | 3.48   |

|                                                                                                                  |    |                       |                                  |     |    |    |       |                            |         |         |       |   |         |        |
|------------------------------------------------------------------------------------------------------------------|----|-----------------------|----------------------------------|-----|----|----|-------|----------------------------|---------|---------|-------|---|---------|--------|
| [P06202]OPPA_SALTY Periplasmic oligopeptide-binding protein                                                      | 9  |                       | LADPNTASPYASYLQYGHIANIDD IIAGK   | 125 | 29 | 4  | 11.23 | b4b12y7°y7                 | 3091.50 | 133.217 | 6199  | 3 | 1031.17 | -12.24 |
| [P06202]OPPA_SALTY Periplasmic oligopeptide-binding protein                                                      | 10 |                       | DLFEGLLISDVEGHPSPGVAEK           | 67  | 22 | 3  | 12.85 | b4y8y12                    | 2309.16 | 64.782  | 5289  | 3 | 770.39  | -1.59  |
| [P06202]OPPA_SALTY Periplasmic oligopeptide-binding protein                                                      | 11 |                       | NPQYWDNAKTVINQVTYLPISSEV TDVNR   | 232 | 29 | 4  | 13.79 | b3b15y7y11                 | 3364.68 | 102.306 | 26270 | 3 | 1122.23 | -0.58  |
| [P06202]OPPA_SALTY Periplasmic oligopeptide-binding protein                                                      | 12 |                       | DPLDNIYVKNLYIIK                  | 527 | 15 | 5  | 25.35 | b7b8°b8b10°b10             | 1821.00 | 129.539 | 14335 | 2 | 911.01  | -5.90  |
| [P06202]OPPA_SALTY Periplasmic oligopeptide-binding protein                                                      | 13 |                       | NNGSEVQSLDPHKIEGVPESNVSR         | 43  | 24 | 5  | 35.53 | b4b5y5y6y11                | 2592.23 | 51.726  | 10362 | 4 | 648.81  | -11.96 |
| [P06202]OPPA_SALTY Periplasmic oligopeptide-binding protein                                                      | 14 | Carbamidomethyl+C(13) | EIPNEVRVDPYLCTYYYEINNQK          | 284 | 23 | 6  | 19.15 | b4*b4b6b13y11°y11          | 2920.39 | 76.333  | 8342  | 3 | 974.13  | 2.09   |
| [P06202]OPPA_SALTY Periplasmic oligopeptide-binding protein                                                      | 15 |                       | DLFEGLLISDVEGHPSPGVAEKWE NK      | 67  | 26 | 5  | 11.72 | b14y4*y4y13*y13            | 2866.46 | 95.055  | 6035  | 3 | 956.16  | 13.37  |
| [P06202]OPPA_SALTY Periplasmic oligopeptide-binding protein                                                      | 16 |                       | FGDKWTQPANIVTNGAYK               | 200 | 18 | 4  | 21.99 | b6b11*b11b15               | 2009.99 | 90.136  | 2241  | 4 | 503.25  | -7.23  |
| [P0A2C5]RBSB_SALTY D-ribose-binding periplasmic protein                                                          | 1  |                       | ILLINPTDSDAVGNAVK                | 84  | 17 | 10 | 75.36 | b1b2b3b4b5y11y12y13y14 y17 | 1739.96 | 70.914  | 36017 | 2 | 870.48  | 2.95   |
| [P0A2C5]RBSB_SALTY D-ribose-binding periplasmic protein                                                          | 2  |                       | DTIALVISTLNNPFFVSLKDGAQK EADK    | 26  | 28 | 4  | 24.56 | y4y7y10y25                 | 3034.57 | 114.816 | 15551 | 4 | 759.40  | -14.56 |
| [P0A2C5]RBSB_SALTY D-ribose-binding periplasmic protein                                                          | 3  |                       | ALQTAGK                          | 224 | 7  | 6  | 39.27 | b1b6y3y6*y6y7              | 688.40  | 35.190  | 3368  | 1 | 688.40  | 5.76   |
| [P0A2C5]RBSB_SALTY D-ribose-binding periplasmic protein                                                          | 4  |                       | LVIK                             | 291 | 4  | 1  | 12.35 | y3                         | 472.35  | 57.242  | 20024 | 1 | 472.35  | -2.20  |
| [P0A2C5]RBSB_SALTY D-ribose-binding periplasmic protein                                                          | 5  |                       | YPVDLK                           | 285 | 6  | 3  | 38.83 | b3b4b5                     | 734.41  | 73.305  | 17684 | 1 | 734.41  | 1.16   |
| [P0A2C5]RBSB_SALTY D-ribose-binding periplasmic protein                                                          | 6  |                       | GDVVSHIASDNVLGGK                 | 119 | 16 | 10 | 57.73 | b4b6b7b8°b8y3y7*y7y9°y9    | 1567.78 | 35.212  | 3911  | 3 | 523.27  | -16.74 |
| [P0A2C5]RBSB_SALTY D-ribose-binding periplasmic protein                                                          | 7  |                       | FNVLASQPADFDRTK                  | 178 | 15 | 7  | 41.4  | b7°b7b9°b9b13y8y9          | 1708.85 | 83.993  | 16638 | 2 | 854.93  | -8.14  |
| [P0A2C5]RBSB_SALTY D-ribose-binding periplasmic protein                                                          | 8  |                       | EADKLGYNLVVLDSQNNPAK             | 50  | 20 | 3  | 13.7  | b9y8y11                    | 2188.13 | 78.528  | 4656  | 3 | 730.05  | 3.79   |
| [P0A2C5]RBSB_SALTY D-ribose-binding periplasmic protein                                                          | 9  | Oxidation+M(25)       | GLNVMQNLLTAHPDVQAVFAQN DEMALGALR | 193 | 31 | 3  | 11.03 | b5b15y13                   | 3352.69 | 84.002  | 1923  | 3 | 1118.24 | 5.02   |
| [P10372]HIS4_SALTY 1-(5-phohoribosyl)-5-[(5-phohoribosylamino)methylideneamino]imidazole-4-carboxamide isomerase | 1  |                       | MIIPALDLIDGTVVR                  | 0   | 15 | 8  | 53.43 | b2b3y5y6y7y9y12y15         | 1625.93 | 103.121 | 82558 | 2 | 813.47  | 1.65   |
| [P10372]HIS4_SALTY 1-(5-phohoribosyl)-5-[(5-phohoribosylamino)methylideneamino]imidazole-4-carboxamide isomerase | 2  |                       | QVAVSGWQENSGVSLEQLVETYL PVGLK    | 138 | 28 | 5  | 11.36 | b4y1y3y5y28                | 3030.61 | 118.445 | 13216 | 3 | 1010.87 | 10.55  |
| [P10372]HIS4_SALTY 1-(5-phohoribosyl)-5-[(5-phohoribosylamino)methylideneamino]imidazole-4-carboxamide isomerase | 3  |                       | GWFER                            | 113 | 5  | 1  | 12.79 | b3                         | 694.33  | 51.625  | 15530 | 1 | 694.33  | -7.56  |

|                                                                                                                  |    |                                             |                                 |     |    |   |       |                            |         |         |       |   |         |        |
|------------------------------------------------------------------------------------------------------------------|----|---------------------------------------------|---------------------------------|-----|----|---|-------|----------------------------|---------|---------|-------|---|---------|--------|
| [P10372]HIS4_SALTY 1-(5-phohoribosyl)-5-[(5-phohoribosylamino)methylideneamino]imidazole-4-carboxamide isomerase | 4  |                                             | YPQIAFQSSGGIGDIDDIAALR          | 193 | 22 | 9 | 53.15 | b3b6b7b11b14°b14b19y9y13   | 2307.12 | 118.573 | 6169  | 2 | 1154.07 | -16.72 |
| [P10372]HIS4_SALTY 1-(5-phohoribosyl)-5-[(5-phohoribosylamino)methylideneamino]imidazole-4-carboxamide isomerase | 5  |                                             | QIPLIK                          | 60  | 6  | 1 | 13.24 | y4                         | 711.47  | 52.635  | 5149  | 2 | 356.24  | -14.93 |
| [P10372]HIS4_SALTY 1-(5-phohoribosyl)-5-[(5-phohoribosylamino)methylideneamino]imidazole-4-carboxamide isomerase | 6  |                                             | LQDYAAQGAGVLHLVDLTGAK           | 34  | 21 | 3 | 13.25 | b8b14y3                    | 2140.09 | 70.270  | 4785  | 2 | 1070.55 | -20.99 |
| [P10372]HIS4_SALTY 1-(5-phohoribosyl)-5-[(5-phohoribosylamino)methylideneamino]imidazole-4-carboxamide isomerase | 7  | Carbamidomethyl+C(4); Carbamidomethyl+C(25) | HVLCTDISRDGTLAGSNVSLYEEV<br>CAR | 166 | 27 | 5 | 14.52 | b7b13°b13y3y10             | 3022.43 | 107.177 | 10017 | 4 | 756.36  | -2.67  |
| [P10372]HIS4_SALTY 1-(5-phohoribosyl)-5-[(5-phohoribosylamino)methylideneamino]imidazole-4-carboxamide isomerase | 8  |                                             | LHQGDYARQR                      | 15  | 10 | 7 | 37.84 | b3b8°b8*b8y6*y6y8          | 1243.61 | 36.052  | 4734  | 3 | 415.21  | -14.63 |
| [P66955]TALB_SALTY Transaldolase B                                                                               | 1  |                                             | LSFSGEVK                        | 262 | 8  | 4 | 34.95 | b2b5b7y7                   | 866.46  | 39.186  | 18671 | 2 | 433.73  | -2.04  |
| [P66955]TALB_SALTY Transaldolase B                                                                               | 2  |                                             | LYQPQDATTNPSSLILNAAQIPEYR       | 25  | 24 | 6 | 22.49 | b1y2y4y7y8y24              | 2716.39 | 81.479  | 15303 | 3 | 906.13  | -2.97  |
| [P66955]TALB_SALTY Transaldolase B                                                                               | 3  |                                             | LSYDTEASIAK                     | 100 | 11 | 4 | 23.27 | b4b8y7y11                  | 1197.60 | 45.058  | 15169 | 2 | 599.30  | 0.92   |
| [P66955]TALB_SALTY Transaldolase B                                                                               | 4  |                                             | ISTEVDAR                        | 92  | 8  | 7 | 49.5  | b6°b6b7b8y3y5y8            | 890.44  | 28.279  | 13532 | 2 | 445.73  | -14.87 |
| [P66955]TALB_SALTY Transaldolase B                                                                               | 5  | Carbamidomethyl+C(11)                       | NVGEILELAGCDR                   | 228 | 13 | 4 | 19.69 | b4b12y8y13                 | 1445.71 | 74.282  | 11932 | 2 | 723.36  | 1.44   |
| [P66955]TALB_SALTY Transaldolase B                                                                               | 6  |                                             | LIDDAVAWAK                      | 50  | 10 | 4 | 25.84 | b3b5y7y10                  | 1101.60 | 47.189  | 9345  | 2 | 551.30  | 2.44   |
| [P66955]TALB_SALTY Transaldolase B                                                                               | 7  |                                             | DYAPAEDPGVVSVEIYEYYK            | 193 | 21 | 5 | 13.25 | b2b5y4y6y21                | 2408.12 | 92.709  | 9325  | 3 | 803.38  | 0.61   |
| [P66955]TALB_SALTY Transaldolase B                                                                               | 8  |                                             | QFTTVVADTGDIAAMK                | 9   | 16 | 9 | 60.74 | b3b8b14y10y11°y11y14y15y16 | 1667.84 | 96.916  | 4612  | 2 | 834.42  | 5.49   |
| [P66955]TALB_SALTY Transaldolase B                                                                               | 9  | Carbamidomethyl+C(2)                        | ACAEAGVYLISPFVGR                | 165 | 16 | 6 | 43.84 | b9b12b15y3y4y6             | 1709.87 | 94.940  | 2773  | 2 | 855.44  | -1.71  |
| [P66955]TALB_SALTY Transaldolase B                                                                               | 10 |                                             | FAVDQEK                         | 301 | 7  | 8 | 49.06 | b5y3°y3y5°y5y6°y6*y6       | 836.41  | 136.255 | 2122  | 1 | 836.41  | -2.19  |
| [P66955]TALB_SALTY Transaldolase B                                                                               | 11 |                                             | ELAESEGAIER                     | 250 | 11 | 6 | 35.27 | b4b7°b7b8y7°y7             | 1203.58 | 118.536 | 2051  | 1 | 1203.58 | -0.91  |
| [P66955]TALB_SALTY Transaldolase B                                                                               | 12 |                                             | QQSSDRAQQVVDATDK                | 60  | 16 | 5 | 40    | b14y3y8y10y12              | 1775.88 | 75.011  | 9553  | 2 | 888.44  | 14.92  |
| [P66955]TALB_SALTY Transaldolase B                                                                               | 13 |                                             | LAVNIGLEILKLVPGR                | 76  | 16 | 4 | 27.08 | b11b12b15y11               | 1705.09 | 136.737 | 3521  | 1 | 1705.09 | 12.24  |
| [P66955]TALB_SALTY Transaldolase B                                                                               | 14 |                                             | ILDWYKANTDK                     | 181 | 11 | 4 | 49.08 | y4y5y6y7                   | 1366.68 | 72.020  | 2356  | 2 | 683.84  | -14.74 |
| [P66955]TALB_SALTY Transaldolase B                                                                               | 15 |                                             | LYQPQDATTNPSSLILNA              | 25  | 17 | 0 | 8.45  |                            | 1858.95 | 81.532  | 3603  | 3 | 620.32  | -3.02  |
| [P0A1S4]STPA_SALTY DNA-binding protein stpA                                                                      | 1  |                                             | MNMLQNLNNIR                     | 0   | 12 | 9 | 79.66 | b2b3b4b11b12y4y7y9y11      | 1473.77 | 76.434  | 24839 | 2 | 737.39  | 0.25   |
| [P0A1S4]STPA_SALTY DNA-binding protein stpA                                                                      | 2  |                                             | INAFLELMK                       | 57  | 9  | 3 | 29.37 | b6b8y7                     | 1078.59 | 84.878  | 22704 | 2 | 539.80  | -9.62  |

|                                                   |    |                                             |                                  |     |    |    |        |                                                        |         |         |        |   |         |        |
|---------------------------------------------------|----|---------------------------------------------|----------------------------------|-----|----|----|--------|--------------------------------------------------------|---------|---------|--------|---|---------|--------|
| P0A1S4 STPA_SALTY DNA-binding protein stpA        | 3  |                                             | AMAREFSIDVLEEMLEK                | 15  | 17 | 4  | 26.18  | b5b10b11y13                                            | 2010.99 | 91.375  | 2743   | 2 | 1006.00 | 0.12   |
| P0A1S4 STPA_SALTY DNA-binding protein stpA        | 4  |                                             | EFSIDVLEEMLEK                    | 19  | 13 | 5  | 30.93  | b7b10b11y10°y10                                        | 1581.78 | 104.622 | 23116  | 2 | 791.39  | 6.56   |
| P0A1S4 STPA_SALTY DNA-binding protein stpA        | 5  |                                             | ADGINPEELFAMDSAMPR               | 66  | 18 | 3  | 14.83  | b7b16y11                                               | 1963.92 | 74.503  | 11289  | 3 | 655.31  | 15.85  |
| P53636 SODC1_SALTY Superoxide dismutase [Cu-Zn] 1 | 1  | Carbamidomethyl+C(3)                        | FACGVIEK                         | 169 | 8  | 9  | 52.51  | y2°y2y4y5°y5y6°y6y7y8                                  | 923.46  | 41.892  | 120363 | 2 | 462.23  | -9.32  |
| P53636 SODC1_SALTY Superoxide dismutase [Cu-Zn] 1 | 2  |                                             | GGDNYSDKPAPLGGGGAR               | 151 | 18 | 7  | 60.3   | y5y6y7y8y11y13y18                                      | 1688.78 | 34.008  | 89536  | 3 | 563.60  | -11.06 |
| P53636 SODC1_SALTY Superoxide dismutase [Cu-Zn] 1 | 3  |                                             | SLSELK                           | 137 | 6  | 1  | 13.24  | b5                                                     | 676.39  | 37.265  | 2988   | 2 | 338.70  | 4.78   |
| P53636 SODC1_SALTY Superoxide dismutase [Cu-Zn] 1 | 4  |                                             | DGKEVPALMAGGHLDPK                | 81  | 18 | 5  | 29.38  | b4b11y8y11y15                                          | 1863.92 | 83.836  | 1937   | 2 | 932.46  | -3.67  |
| P68684 RS21_SALTY 30S ribosomal protein S21       | 1  |                                             | ENEPFDVALR                       | 7   | 10 | 12 | 66.2   | b2b10*b10y2y4y5y6y7°y7y9°y9y10                         | 1189.58 | 63.824  | 83956  | 2 | 595.30  | -0.92  |
| P68684 RS21_SALTY 30S ribosomal protein S21       | 2  |                                             | EFYEKPTTER                       | 35  | 10 | 4  | 27.6   | b7y4y5y10                                              | 1299.61 | 33.507  | 5689   | 3 | 433.87  | -9.67  |
| Q8ZKP7 TPIS_SALTY Triosephohate isomerase         | 1  | Carbamidomethyl+C(8)                        | ELTGVAGCDVAIAPPEMYIDLAKR         | 28  | 24 | 9  | 44.81  | b6°b6b13y4y10y11y12y18y24                              | 2589.30 | 82.787  | 70444  | 3 | 863.77  | -3.11  |
| Q8ZKP7 TPIS_SALTY Triosephohate isomerase         | 2  |                                             | SATPAQAQAVHK                     | 176 | 12 | 21 | 121.06 | b2b3°b3b5°b5b11y1y2y4y5*y5y6*y6y7*y7y8*y8y9*y9y10y12   | 1208.63 | 19.216  | 64809  | 2 | 604.82  | -3.33  |
| Q8ZKP7 TPIS_SALTY Triosephohate isomerase         | 3  |                                             | TQGAAAFEGAVIAYEPVWAIGTGK         | 152 | 24 | 16 | 37.43  | b1°b1b2°b2°b2b5°b5b11b12b14y1y2y4y7y12y24              | 2407.24 | 93.767  | 47622  | 2 | 1204.12 | 4.16   |
| Q8ZKP7 TPIS_SALTY Triosephohate isomerase         | 4  | Carbamidomethyl+C(8)                        | ELTGVAGCDVAIAPPEMYIDLAK          | 28  | 23 | 5  | 25.55  | b10b11y10y13y23                                        | 2433.22 | 88.163  | 40104  | 2 | 1217.11 | 5.02   |
| Q8ZKP7 TPIS_SALTY Triosephohate isomerase         | 5  | Carbamidomethyl+C(14)                       | FAVLKEQGLTPVLCIGETEAEAEA GK      | 112 | 26 | 4  | 11.72  | b23y1y5y9                                              | 2803.39 | 115.631 | 4219   | 3 | 935.14  | -9.06  |
| Q8ZKP7 TPIS_SALTY Triosephohate isomerase         | 6  |                                             | DIGAQYIIIGHSER                   | 84  | 14 | 3  | 18.37  | b6b10y7                                                | 1571.83 | 64.870  | 9687   | 2 | 786.42  | 8.39   |
| Q8ZKP7 TPIS_SALTY Triosephohate isomerase         | 7  | Carbamidomethyl+C(9)                        | EQGLTPVLCIGETEAEAEAGK            | 117 | 21 | 3  | 19.89  | y8y10y12                                               | 2245.09 | 109.888 | 5697   | 3 | 749.03  | 10.55  |
| Q8ZKP7 TPIS_SALTY Triosephohate isomerase         | 8  | Carbamidomethyl+C(9); Carbamidomethyl+C(26) | EQGLTPVLCIGETEAEAEAGKTEEVCAR     | 117 | 28 | 17 | 142.06 | b4b5°b5b13y3y4y5y7y10y12y13y18y20y21y23y24y26          | 3090.44 | 72.312  | 277884 | 3 | 1030.82 | -0.08  |
| Q8ZKP7 TPIS_SALTY Triosephohate isomerase         | 9  | Oxidation+M(8)                              | AAAGSHIMLGAQNVLDNLSGAFTGETSAEMLK | 52  | 32 | 8  | 25.83  | b5b6b9b25°b25y5y8°y8                                   | 3220.58 | 136.390 | 3959   | 4 | 805.90  | 5.38   |
| Q8ZKP7 TPIS_SALTY Triosephohate isomerase         | 10 |                                             | PAQAQAVHK                        | 179 | 9  | 8  | 76.87  | b3b4b5b6°b6b7b8°b8                                     | 949.51  | 19.209  | 27744  | 2 | 475.26  | -11.89 |
| Q8ZKP7 TPIS_SALTY Triosephohate isomerase         | 11 |                                             | TPAQAQAVHK                       | 178 | 10 | 9  | 59.3   | b3°b3b4b6°b6b7°b7b8°b8                                 | 1050.56 | 19.215  | 26416  | 2 | 525.79  | -4.30  |
| Q8ZKP7 TPIS_SALTY Triosephohate isomerase         | 12 |                                             | VAIAPPEMYIDLAK                   | 37  | 14 | 0  | 8.01   |                                                        | 1530.83 | 88.208  | 19339  | 2 | 765.92  | 6.22   |
| Q8ZKP7 TPIS_SALTY Triosephohate isomerase         | 13 |                                             | TQGAAAFEGA                       | 152 | 10 | 0  | 8.45   |                                                        | 922.44  | 93.706  | 10263  | 1 | 922.44  | 13.30  |
| Q7CPL5 RL14_SALTY 50S ribosomal protein L14       | 1  |                                             | MIQEQTMLNVADNSGAR                | 0   | 17 | 20 | 124.86 | b2b3b8°b8b11b13°b13b17y3y5y6y7y8y9°y9y12°y12y14*y14y17 | 1877.89 | 59.434  | 106849 | 2 | 939.45  | 1.63   |
| Q7CPL5 RL14_SALTY 50S ribosomal protein L14       | 2  |                                             | IISLAPEVL                        | 114 | 9  | 6  | 29.37  | b2b5y1y4y5y9                                           | 954.58  | 85.425  | 78408  | 1 | 954.58  | -11.06 |
| Q7CPL5 RL14_SALTY 50S ribosomal protein L14       | 3  | Carbamidomethyl+C(6)                        | FDGNACVILNNNSEQPIGTR             | 78  | 20 | 6  | 20.49  | y3y9°y9°y9y11y20                                       | 2219.06 | 59.591  | 19158  | 2 | 1110.03 | 3.30   |
| Q7CPL5 RL14_SALTY 50S ribosomal protein L14       | 4  | Carbamidomethyl+C(3)                        | VMCIK                            | 18  | 5  | 1  | 12.79  | y4                                                     | 650.33  | 40.934  | 12476  | 1 | 650.33  | -8.82  |
| Q7CPL5 RL14_SALTY 50S ribosomal protein L14       | 5  |                                             | IQEQTMLNVADNSGAR                 | 1   | 16 | 5  | 24.03  | b3b9°b9b12°b12                                         | 1746.88 | 76.702  | 8450   | 2 | 873.94  | 19.43  |



|                                                        |   |                 |                                 |     |    |    |       |                             |         |         |       |   |         |        |
|--------------------------------------------------------|---|-----------------|---------------------------------|-----|----|----|-------|-----------------------------|---------|---------|-------|---|---------|--------|
| Q7CPL5 RL14_SALTY 50S ribosomal protein L14            | 6 |                 | RPDGSVIR                        | 70  | 8  | 3  | 34.95 | b6y5y7                      | 899.49  | 24.423  | 5190  | 2 | 450.25  | -16.69 |
| Q7CPL5 RL14_SALTY 50S ribosomal protein L14            | 7 | Oxidation+M(7)  | MIQEQTMLNVADNSGAR               | 0   | 17 | 3  | 22.93 | y5y10y12                    | 1893.89 | 96.006  | 7800  | 2 | 947.45  | 3.29   |
| P65559 YFCD_SALTY Uncharacterized Nudix hydrolase yfcD | 1 |                 | LASTEWVDIVNEDNEVIAQSSREQMR      | 6   | 26 | 6  | 20.66 | b13b15y3*y3y13y17           | 3019.47 | 78.647  | 4364  | 3 | 1007.16 | 9.86   |
| P65559 YFCD_SALTY Uncharacterized Nudix hydrolase yfcD | 2 |                 | NEAALQEKPETE                    | 171 | 13 | 5  | 24.46 | b2*b2b8y9y10                | 1487.69 | 32.636  | 3400  | 2 | 744.35  | 5.09   |
| P65559 YFCD_SALTY Uncharacterized Nudix hydrolase yfcD | 3 |                 | DFLPGMLDATAGGVVQADEQLLESAR      | 61  | 26 | 5  | 11.72 | b2b10*b10b12y4              | 2703.36 | 84.540  | 3109  | 3 | 901.79  | 11.56  |
| P65559 YFCD_SALTY Uncharacterized Nudix hydrolase yfcD | 4 |                 | TETKDFLPGMLDATAGGVVQADEQLLESAR  | 57  | 30 | 4  | 13.48 | b8b11y4y16                  | 3162.60 | 125.498 | 3036  | 3 | 1054.87 | 11.66  |
| P65559 YFCD_SALTY Uncharacterized Nudix hydrolase yfcD | 5 |                 | MVEQR                           | 0   | 5  | 1  | 12.79 | b3                          | 662.33  | 42.012  | 9402  | 1 | 662.33  | 3.59   |
| P65559 YFCD_SALTY Uncharacterized Nudix hydrolase yfcD | 6 |                 | LASTEWVDIVNEDNEVIAQSSR          | 6   | 22 | 3  | 12.85 | b8b13y11                    | 2475.24 | 86.429  | 2542  | 3 | 825.75  | 15.88  |
| P65559 YFCD_SALTY Uncharacterized Nudix hydrolase yfcD | 7 |                 | HRATYIVVHDGMGK                  | 37  | 14 | 5  | 37.4  | y7y8*y8y10y12               | 1583.83 | 136.332 | 2108  | 2 | 792.42  | 11.33  |
| P65559 YFCD_SALTY Uncharacterized Nudix hydrolase yfcD | 8 | Oxidation+M(10) | TETKDFLPGMLDATAGGVVQADEQLLESAR  | 57  | 30 | 5  | 15.84 | b14y5y11*y11y13             | 3178.60 | 91.994  | 3952  | 3 | 1060.21 | 14.90  |
| P0A1W6 LIVK_SALTY Leucine-ecific-binding protein       | 1 |                 | TQFMGPEGVGNASLSNIAGGAEEGMLVTMPK | 242 | 31 | 6  | 21.17 | b1b4b5b9y13y31              | 3035.47 | 92.602  | 6854  | 3 | 1012.49 | 1.69   |
| P0A1W6 LIVK_SALTY Leucine-ecific-binding protein       | 2 |                 | TAGLDSSQGPTAAK                  | 139 | 14 | 7  | 43.66 | b1b12y6*y6y10y11y12         | 1303.65 | 29.265  | 6240  | 2 | 652.33  | -0.28  |
| P0A1W6 LIVK_SALTY Leucine-ecific-binding protein       | 3 |                 | GFEFGVFQWHADGSSTVAK             | 350 | 19 | 4  | 14.23 | b3*b3b12y10                 | 2070.01 | 122.746 | 2736  | 3 | 690.68  | 20.05  |
| P0A1W6 LIVK_SALTY Leucine-ecific-binding protein       | 4 |                 | DINAKGGIK                       | 54  | 9  | 3  | 29.37 | b6y4y5                      | 915.52  | 26.771  | 42118 | 2 | 458.27  | -2.40  |
| P0A1W6 LIVK_SALTY Leucine-ecific-binding protein       | 5 |                 | QQYGEGLARSVQDGLK                | 170 | 16 | 4  | 26.41 | b3b10b14y8                  | 1748.90 | 77.785  | 14968 | 2 | 874.96  | 6.00   |
| P0A1W6 LIVK_SALTY Leucine-ecific-binding protein       | 6 |                 | SVQDGLKQGNANIVFFDGITAGEK        | 179 | 24 | 4  | 12.2  | b3b11y3*y3                  | 2508.31 | 74.082  | 4127  | 2 | 1254.66 | 12.85  |
| P60726 RL4_SALTY 50S ribosomal protein L4              | 1 |                 | DFNEALVHQVVVAYAAGAR             | 21  | 19 | 6  | 48.27 | b10b11y5y6y7y19             | 2030.05 | 83.820  | 48992 | 3 | 677.36  | 3.79   |
| P60726 RL4_SALTY 50S ribosomal protein L4              | 2 |                 | VVMTADAVK                       | 185 | 9  | 4  | 37.15 | b2y5y6y8                    | 933.50  | 37.311  | 44821 | 2 | 467.25  | -9.74  |
| P60726 RL4_SALTY 50S ribosomal protein L4              | 3 |                 | LKDMALEDVLIITGELDENLFLAAR       | 137 | 25 | 7  | 26.09 | b5b7b10b20y2y9*y9           | 2802.50 | 136.363 | 18595 | 3 | 934.84  | 2.27   |
| P60726 RL4_SALTY 50S ribosomal protein L4              | 4 |                 | FSVEAPK                         | 123 | 7  | 3  | 39.27 | b4y3y6                      | 777.40  | 41.995  | 72990 | 2 | 389.20  | -16.49 |
| P60726 RL4_SALTY 50S ribosomal protein L4              | 5 |                 | DATGIDPVSLIAFDK                 | 170 | 15 | 4  | 40.19 | y4y7y10y13                  | 1561.81 | 88.132  | 48739 | 2 | 781.41  | -0.16  |
| P60726 RL4_SALTY 50S ribosomal protein L4              | 6 |                 | DAQSALTVSETTFGR                 | 6   | 15 | 10 | 45.44 | b6*b6*b6b11*b11y5y8y9*y9y11 | 1582.78 | 47.152  | 22371 | 3 | 528.26  | 3.32   |
| P60726 RL4_SALTY 50S ribosomal protein L4              | 7 |                 | KPWR                            | 57  | 4  | 1  | 12.35 | y3                          | 586.35  | 35.137  | 14133 | 1 | 586.35  | 12.39  |
| P60726 RL4_SALTY 50S ribosomal protein L4              | 8 |                 | DATGIDPVSLIAFDKVVMTADAVK        | 170 | 24 | 7  | 59.61 | b3y3y4y7y8y12y13            | 2476.30 | 102.245 | 51901 | 3 | 826.10  | -1.48  |
| P60726 RL4_SALTY 50S ribosomal protein L4              | 9 |                 | VVMTADAVKQVEMLA                 | 185 | 16 | 3  | 22.86 | b5y4y5                      | 1733.88 | 94.674  | 14416 | 2 | 867.45  | 0.92   |

|                                                        |    |                    |                                       |     |    |   |       |                            |         |         |       |   |         |        |
|--------------------------------------------------------|----|--------------------|---------------------------------------|-----|----|---|-------|----------------------------|---------|---------|-------|---|---------|--------|
| P60726 RL4_SALTY 50S ribosomal protein L4              | 10 |                    | SGGVTFARPQDHSQKVNK                    | 79  | 19 | 3 | 14.23 | b7b10y10                   | 2027.05 | 31.278  | 1611  | 2 | 1014.03 | 4.82   |
| P60726 RL4_SALTY 50S ribosomal protein L4              | 11 | Phosphoryl STY(13) | MELVLKDAQSALTVSETTFGR                 | 0   | 21 | 3 | 13.25 | b11b13y5                   | 2376.17 | 73.394  | 2866  | 3 | 792.73  | 12.54  |
| P60726 RL4_SALTY 50S ribosomal protein L4              | 12 | Oxidation+M(1)     | MELVLKDAQSALTVSETTFGR                 | 0   | 21 | 4 | 22.9  | y6°y6y7y9                  | 2312.20 | 100.905 | 6860  | 3 | 771.41  | 10.14  |
| P60726 RL4_SALTY 50S ribosomal protein L4              | 13 | Oxidation+M(4)     | LKDMALEDVLIITGELDENLFLAAR             | 137 | 25 | 9 | 47.05 | b5b7°b7b10b11b15y10*y10y11 | 2818.47 | 103.427 | 6613  | 4 | 705.37  | -6.32  |
| Q8ZQT5 TOLB_SALTY Protein tolB                         | 1  |                    | SNNTEPTWFPDSQTLAFTSDQAGRPQVYK         | 287 | 29 | 5 | 11.23 | b4y14*y14y24y29            | 3285.55 | 77.683  | 43971 | 3 | 1095.85 | 1.11   |
| Q8ZQT5 TOLB_SALTY Protein tolB                         | 2  |                    | IEITQGVD SARPIGVVPFK                  | 24  | 19 | 7 | 24.74 | b2b9y1y3y15y16y19          | 2026.12 | 70.646  | 28289 | 3 | 676.05  | -5.54  |
| Q8ZQT5 TOLB_SALTY Protein tolB                         | 3  |                    | WAGPGAAPEDIGGIVAADLR                  | 43  | 20 | 5 | 13.7  | b7y2y5y14y20               | 1936.00 | 85.508  | 24291 | 2 | 968.50  | 4.10   |
| Q8ZQT5 TOLB_SALTY Protein tolB                         | 4  |                    | LPATDGQVK                             | 413 | 9  | 9 | 65.75 | b9y4y5°y5y6y7y8*y8y9       | 928.51  | 28.360  | 23309 | 2 | 464.76  | -0.33  |
| Q8ZQT5 TOLB_SALTY Protein tolB                         | 5  |                    | SALVIQTLANGAVR                        | 223 | 14 | 5 | 31.68 | b3b4y2y9y11                | 1412.82 | 71.040  | 18097 | 2 | 706.91  | -2.59  |
| Q8ZQT5 TOLB_SALTY Protein tolB                         | 6  |                    | QVASFPR                               | 237 | 7  | 3 | 39.27 | y3y4y5                     | 804.42  | 39.274  | 14428 | 2 | 402.71  | -19.50 |
| Q8ZQT5 TOLB_SALTY Protein tolB                         | 7  |                    | TGSLNLYVMDLASGQIR                     | 264 | 17 | 4 | 21.71 | b7b11y6y16                 | 1837.94 | 39.301  | 11656 | 3 | 613.32  | -3.72  |
| Q8ZQT5 TOLB_SALTY Protein tolB                         | 8  |                    | HNGAPAFSPDGTK                         | 244 | 13 | 4 | 30.93 | b8b9b12y10                 | 1298.61 | 57.836  | 9683  | 2 | 649.81  | -3.29  |
| Q8ZQT5 TOLB_SALTY Protein tolB                         | 9  |                    | FNPLDR                                | 67  | 6  | 3 | 26.03 | y3°y3y4                    | 761.39  | 36.050  | 6031  | 2 | 381.20  | -3.37  |
| Q8ZQT5 TOLB_SALTY Protein tolB                         | 10 |                    | SPQPLMSPAWSPDGSK                      | 197 | 16 | 6 | 23.01 | b4*b4b10°b10y5y10          | 1684.83 | 36.061  | 3768  | 3 | 562.28  | 18.77  |
| Q8ZQT5 TOLB_SALTY Protein tolB                         | 11 |                    | MNINGGAAQR                            | 316 | 10 | 3 | 25.84 | b3b5y8                     | 1031.49 | 94.919  | 1958  | 1 | 1031.49 | -12.43 |
| Q8ZQT5 TOLB_SALTY Protein tolB                         | 12 | Phosphoryl STY(7)  | IAYVVQTNGGQFPYELR                     | 166 | 17 | 6 | 44.84 | b3b5b8°b8b9b12             | 2034.99 | 79.299  | 5906  | 3 | 679.00  | 13.26  |
| P02906 SUBI_SALTY Sulfate-binding protein              | 1  |                    | YLYSPEGQEIAAK                         | 263 | 13 | 5 | 37.92 | b4y9y10y11y13              | 1468.73 | 51.241  | 47288 | 2 | 734.87  | -0.75  |
| P02906 SUBI_SALTY Sulfate-binding protein              | 2  |                    | DIQLLNVSYPTR                          | 20  | 13 | 5 | 19.69 | b10y5y9*y9y13              | 1533.78 | 69.916  | 28982 | 2 | 767.40  | -5.09  |
| P02906 SUBI_SALTY Sulfate-binding protein              | 3  |                    | LFTIDEVFGGWAK                         | 298 | 13 | 5 | 24.46 | b10°b10b11y8y13            | 1482.76 | 102.556 | 27121 | 2 | 741.88  | -2.80  |
| P02906 SUBI_SALTY Sulfate-binding protein              | 4  |                    | QATSVINGIEADVVTALAYDVD AIAER          | 66  | 28 | 4 | 21.56 | b16y12y13y15               | 2917.53 | 136.633 | 8213  | 2 | 1459.27 | 3.60   |
| P02906 SUBI_SALTY Sulfate-binding protein              | 5  |                    | NVEVLDSGAR                            | 183 | 10 | 4 | 25.84 | b3°b3y5y8                  | 1059.54 | 40.807  | 28764 | 2 | 530.27  | -3.57  |
| P02906 SUBI_SALTY Sulfate-binding protein              | 6  |                    | QSHGGSGKQATSVINGIEADVVTLALAYDVD AIAER | 58  | 36 | 6 | 25.04 | b11*b11b12b14b16°b16       | 3655.82 | 87.685  | 6810  | 5 | 731.97  | -11.02 |
| P02906 SUBI_SALTY Sulfate-binding protein              | 7  |                    | QETGDNV VIRQSHGGSGK                   | 48  | 18 | 4 | 14.83 | b9b16y4°y4                 | 1868.92 | 99.803  | 4641  | 2 | 934.96  | -0.13  |
| P02906 SUBI_SALTY Sulfate-binding protein              | 8  |                    | AVAEAYLKLYSPEGQEIAAK                  | 255 | 21 | 5 | 47.16 | y9y10*y10y11y12            | 2314.20 | 115.045 | 2765  | 3 | 772.07  | -0.21  |
| P02906 SUBI_SALTY Sulfate-binding protein              | 9  | Phosphoryl STY(15) | FEIVTPSESILAPTVSVVDK                  | 226 | 21 | 4 | 19.89 | y5y8°y8y10                 | 2340.15 | 136.259 | 2090  | 2 | 1170.58 | -2.71  |
| Q9L9I8 THIE_SALTY Thiamine-phosphate pyrophosphorylase | 1  |                    | LGLYPVDSVEWIER                        | 12  | 15 | 5 | 38.21 | b14y4y5y7y11               | 1774.94 | 95.348  | 30091 | 2 | 887.97  | 2.54   |
| Q9L9I8 THIE_SALTY Thiamine-phosphate pyrophosphorylase | 2  |                    | MYQPDFPTVPFR                          | 0   | 12 | 3 | 21.29 | b3y3y10                    | 1497.73 | 78.076  | 27823 | 2 | 749.37  | 4.32   |
| Q9L9I8 THIE_SALTY Thiamine-phosphate pyrophosphorylase | 3  |                    | APAVLATGVGSI AVVSAITQAADWR            | 171 | 25 | 3 | 22.42 | y4y5y8                     | 2424.31 | 108.196 | 2286  | 3 | 808.78  | -4.43  |
| Q9L9I8 THIE_SALTY Thiamine-phosphate pyrophosphorylase | 4  |                    | QMPSAPQGLAQLASHIER                    | 137 | 18 | 6 | 23.65 | b14°b14y6y9y16°y16         | 1933.97 | 75.394  | 31564 | 3 | 645.33  | -10.23 |

|                                                    |    |                       |                                                |     |    |    |       |                                   |         |         |       |   |         |        |
|----------------------------------------------------|----|-----------------------|------------------------------------------------|-----|----|----|-------|-----------------------------------|---------|---------|-------|---|---------|--------|
| Q9L9I8 THIE_SALTY Thiamine-phohate pyrophohorylase | 5  |                       | LADYPTVAIGGISLER                               | 155 | 16 | 3  | 16.33 | b10y6y10                          | 1674.90 | 36.079  | 17487 | 2 | 837.95  | -6.05  |
| Q9L9I8 THIE_SALTY Thiamine-phohate pyrophohorylase | 6  |                       | LAIK                                           | 73  | 4  | 1  | 12.35 | y3                                | 444.31  | 46.025  | 10928 | 1 | 444.31  | -10.03 |
| Q9L9I8 THIE_SALTY Thiamine-phohate pyrophohorylase | 7  |                       | AYGVHLGQEDLETTDLK                              | 79  | 17 | 9  | 53.1  | b4b6b10b14y8y10°y10y13°y13        | 1888.95 | 87.710  | 2829  | 3 | 630.32  | 13.76  |
| P58580 GSHB_SALTY Glutathione synthetase           | 1  |                       | LYTAWFADLTPETLVTR                              | 125 | 17 | 4  | 37.94 | b6b7b8b10                         | 1997.04 | 102.364 | 6598  | 2 | 999.03  | 3.55   |
| P58580 GSHB_SALTY Glutathione synthetase           | 2  |                       | EGDPNIGVIAETLTELGNR                            | 174 | 19 | 3  | 14.23 | b9b15y6                           | 1998.01 | 66.748  | 4663  | 4 | 500.26  | -2.81  |
| P58580 GSHB_SALTY Glutathione synthetase           | 3  |                       | EIEAEYPISITGMLMDAIEAR                          | 291 | 21 | 8  | 49.14 | b3b10b13°b13y5y6y7y10             | 2352.17 | 119.861 | 3778  | 2 | 1176.59 | 8.41   |
| P58580 GSHB_SALTY Glutathione synthetase           | 4  |                       | KDPPFDTEFIYATYILER                             | 86  | 18 | 7  | 23.65 | b4b7b12°b12y2°y2y12               | 2218.10 | 126.545 | 3360  | 2 | 1109.55 | -3.85  |
| P58580 GSHB_SALTY Glutathione synthetase           | 5  |                       | WYEFGSEQEIK                                    | 65  | 11 | 3  | 23.27 | b9y3y9                            | 1415.67 | 47.090  | 6680  | 3 | 472.56  | 12.76  |
| P58580 GSHB_SALTY Glutathione synthetase           | 6  |                       | GEPRPLSESDWEIARR                               | 241 | 16 | 4  | 24.7  | y3y9y10°y10                       | 1897.95 | 71.784  | 2990  | 3 | 633.32  | -2.83  |
| P58580 GSHB_SALTY Glutathione synthetase           | 7  |                       | TLSVEQNYDKWYEFGSEQEIK                          | 55  | 21 | 5  | 23.65 | b7b9b10°b10y8                     | 2593.19 | 126.985 | 2425  | 3 | 865.07  | -9.32  |
| P58580 GSHB_SALTY Glutathione synthetase           | 8  | Phosphoryl STY(12)    | DPPFDTEFIYATYILER                              | 87  | 17 | 5  | 28.7  | b9b10y7y10_H3PO4y10°y10           | 2169.98 | 86.520  | 2723  | 3 | 724.00  | 7.54   |
| P58580 GSHB_SALTY Glutathione synthetase           | 9  |                       | LYTAWFADLT                                     | 125 | 10 | 0  | 5.34  |                                   | 1200.60 | 102.353 | 8699  | 2 | 600.80  | 2.24   |
| Q8ZN71 DAPA_SALTY Dihydrodipicolinate synthase     | 1  |                       | AIAEHTDLQPILYNVPSR                             | 120 | 18 | 13 | 41.72 | b1b2b4°b4b5b7°b7y6y7*y7y12*y12y18 | 2037.05 | 72.065  | 36062 | 3 | 679.69  | -13.24 |
| Q8ZN71 DAPA_SALTY Dihydrodipicolinate synthase     | 2  |                       | LAAEGQFAEAR                                    | 219 | 11 | 4  | 35.03 | y8y9y10y11                        | 1162.59 | 41.763  | 15843 | 2 | 581.80  | 1.37   |
| Q8ZN71 DAPA_SALTY Dihydrodipicolinate synthase     | 3  |                       | EATGNLTR                                       | 161 | 8  | 5  | 31.94 | b1b3b4y7°y7                       | 861.43  | 43.025  | 8488  | 2 | 431.22  | -13.89 |
| Q8ZN71 DAPA_SALTY Dihydrodipicolinate synthase     | 4  | Carbamidomethyl+C(44) | ELVSDDFILLSGDDASALDFMQLG GHGVISVTANVAAREMADMCK | 174 | 45 | 3  | 11.46 | b5b11y3                           | 4769.29 | 114.141 | 6025  | 4 | 1193.08 | 7.99   |
| Q8ZN71 DAPA_SALTY Dihydrodipicolinate synthase     | 5  |                       | MFTGSIVALVTPMDEK                               | 0   | 16 | 4  | 33.82 | y3y5y7y8                          | 1738.87 | 89.822  | 3763  | 2 | 869.94  | -5.90  |
| Q8ZN71 DAPA_SALTY Dihydrodipicolinate synthase     | 6  |                       | DIVK                                           | 279 | 4  | 1  | 12.35 | y3                                | 474.29  | 39.329  | 23716 | 1 | 474.29  | -11.65 |
| Q8ZN71 DAPA_SALTY Dihydrodipicolinate synthase     | 7  | Carbamidomethyl+C(9)  | FNDSGIVGCLTVPYYNRPTQEGL FQHFK                  | 91  | 29 | 4  | 11.23 | b11y9°y9y13                       | 3388.71 | 95.925  | 22678 | 4 | 847.93  | 19.38  |
| Q8ZN71 DAPA_SALTY Dihydrodipicolinate synthase     | 8  |                       | FTGSIVALVTPMDEK                                | 1   | 15 | 4  | 17.27 | b4°b4y7y10                        | 1607.81 | 136.392 | 1657  | 2 | 804.41  | -15.94 |
| Q8ZN71 DAPA_SALTY Dihydrodipicolinate synthase     | 9  |                       | LPMTPTDHGRDIVK                                 | 268 | 15 | 3  | 17.27 | b3b10y8                           | 1692.90 | 137.364 | 2338  | 2 | 846.96  | -3.32  |
| Q8ZN71 DAPA_SALTY Dihydrodipicolinate synthase     | 10 | Oxidation+M(3)        | LPMTPTDHGR                                     | 268 | 11 | 5  | 45.85 | b3b4b10y5y10                      | 1253.63 | 46.054  | 2487  | 2 | 627.32  | 2.92   |
