# Supplementary material for: Phenotypic profile linked to inhibition of the major Zn influx system in Salmonella enterica : proteomics and ionomics investigations
Source: Royal Society of Chemistry journal article supplement (doi:10.1039/c0mb00140f), 2010-10-20
Supplement: c0mb00140f.zip [file c0mb00140f.zip]

SA123 + Zn(II) LC-MS run 1: 123\_Zn\_220709\_1a2\_01

| Protein name                                                | Peptide Rank | Peptide Modification | Peptide Sequence           | Peptide sequence start | Peptide sequence Length | Peptide Matched Products | Peptide Score | By Matches                                                                                                                                                                                                                                                                               | Precursor MH+ (Da) | Retention time (min) | Intensity | z | Precursor m/z | MH+ Error (ppm) |
|-------------------------------------------------------------|--------------|----------------------|----------------------------|------------------------|-------------------------|--------------------------|---------------|------------------------------------------------------------------------------------------------------------------------------------------------------------------------------------------------------------------------------------------------------------------------------------------|--------------------|----------------------|-----------|---|---------------|-----------------|
| [P0A1S2]HNS_SALTY DNA-binding protein H-NS                  | 1            |                      | EMLIADGIDPNELLNSMAAAK      | 62                     | 21                      | 51                       | 307.3         | b2 <b>°</b> b2b3 <b>°</b> b3b4 <b>°</b> b4b5 <b>°</b> b5b6 <b>°</b> b6b7 <b>°</b> b7b8 <b>°</b> b8b9b10b12 <b>°</b> b12b14 <b>°</b> b14b17b18b21 <b>°</b> b21y1y2y3y4y5y6 <b>°</b> y6y7 <b>°</b> y7y8y9y10y11y12y13 <b>°</b> y13y14y15*y15y16 <b>°</b> y16*y16y17 <b>°</b> y17*y17y18y21 | 2216.11            | 97.460               | 467949    | 2 | 1108.56       | 6.17            |
| [P0A1S2]HNS_SALTY DNA-binding protein H-NS                  | 2            |                      | YSYVDENGETK                | 96                     | 11                      | 8                        | 57.01         | y2y6y7y8y9y10*y10y11                                                                                                                                                                                                                                                                     | 1304.56            | 33.525               | 124687    | 2 | 652.78        | -2.25           |
| [P0A1S2]HNS_SALTY DNA-binding protein H-NS                  | 3            |                      | REEESAAAAEVEER             | 40                     | 14                      | 11                       | 65.45         | b6b8 <b>°</b> b8b10y1y3y4y5y7y11y14                                                                                                                                                                                                                                                      | 1575.74            | 32.948               | 58807     | 2 | 788.37        | 6.82            |
| [P0A1S2]HNS_SALTY DNA-binding protein H-NS                  | 4            |                      | TWTGQGR                    | 107                    | 7                       | 8                        | 32            | b3 <b>°</b> b3b7y5y6 <b>°</b> y6y7*y7                                                                                                                                                                                                                                                    | 805.39             | 23.151               | 4059      | 2 | 403.20        | -10.38          |
| [P0A1S2]HNS_SALTY DNA-binding protein H-NS                  | 5            |                      | QLEDFLIK                   | 128                    | 8                       | 3                        | 35.64         | b3b4b5                                                                                                                                                                                                                                                                                   | 1005.56            | 25.956               | 2596      | 2 | 503.28        | -2.19           |
| [P0A1S2]HNS_SALTY DNA-binding protein H-NS                  | 6            | Carbamidomethyl+C(2) | ECTLETLEEMLEK              | 19                     | 13                      | 6                        | 37.48         | b8y4y5y8*y8y11                                                                                                                                                                                                                                                                           | 1624.76            | 47.884               | 2907      | 3 | 542.26        | 10.22           |
| [P0A1S2]HNS_SALTY DNA-binding protein H-NS                  | 7            |                      | ILNNIR                     | 6                      | 6                       | 4                        | 23.13         | b4*b4y5*y5                                                                                                                                                                                                                                                                               | 742.46             | 28.963               | 1915      | 1 | 742.46        | 0.58            |
| [P0A1S2]HNS_SALTY DNA-binding protein H-NS                  | 8            |                      | YSYVDENGETKTWTGQGR         | 96                     | 18                      | 4                        | 33.63         | y4y12y13y14                                                                                                                                                                                                                                                                              | 2090.92            | 47.605               | 131921    | 3 | 697.65        | -8.06           |
| [P0A1S2]HNS_SALTY DNA-binding protein H-NS                  | 9            |                      | REEESAAAAEVEER             | 40                     | 14                      | 3                        | 23.17         | y3y4y10                                                                                                                                                                                                                                                                                  | 1575.73            | 33.665               | 11945     | 2 | 788.37        | 4.34            |
| [P0A1S2]HNS_SALTY DNA-binding protein H-NS                  | 10           |                      | AARPAKYSYVDENGETK          | 90                     | 17                      | 3                        | 13.09         | b7b12y9                                                                                                                                                                                                                                                                                  | 1898.95            | 54.280               | 6720      | 3 | 633.66        | 14.98           |
| [P0A1S2]HNS_SALTY DNA-binding protein H-NS                  | 11           |                      | TWTGQGRTPAVIK              | 107                    | 13                      | 4                        | 24.01         | b3b10b11*b11                                                                                                                                                                                                                                                                             | 1414.76            | 62.660               | 4434      | 2 | 707.88        | -14.50          |
| [P0A1S2]HNS_SALTY DNA-binding protein H-NS                  | 12           | Carbamidomethyl+C(2) | ECTLETLEEMLEKLEVVNER       | 19                     | 21                      | 6                        | 28.93         | b5b8b11y3*y3y4                                                                                                                                                                                                                                                                           | 2563.23            | 125.581              | 3804      | 4 | 641.56        | -12.86          |
| [P0A1S2]HNS_SALTY DNA-binding protein H-NS                  | 13           |                      | KAMEEQGK                   | 120                    | 8                       | 3                        | 30.87         | b3b5y7                                                                                                                                                                                                                                                                                   | 920.44             | 70.863               | 3070      | 1 | 920.44        | -9.15           |
| [P0A1S2]HNS_SALTY DNA-binding protein H-NS                  | 14           | Oxidation+M(17)      | EMLIADGIDPNELLNSMAAAK      | 62                     | 21                      | 4                        | 20.41         | b15y7y12y13                                                                                                                                                                                                                                                                              | 2232.11            | 97.306               | 17877     | 2 | 1116.56       | 9.73            |
| [P0A1S2]HNS_SALTY DNA-binding protein H-NS                  | 15           | Oxidation+M(7)       | LQQYREMLIADGIDPNELLNSMAAAK | 57                     | 26                      | 3                        | 17.08         | b4b10b12                                                                                                                                                                                                                                                                                 | 2920.47            | 105.852              | 6077      | 3 | 974.16        | 5.52            |
| [P0A1S2]HNS_SALTY DNA-binding protein H-NS                  | 16           |                      | ADGIDPNELLNSMAAAK          | 66                     | 17                      | 4                        | 18.19         | b3 <b>°</b> b3b5b10                                                                                                                                                                                                                                                                      | 1729.86            | 97.429               | 3031      | 2 | 865.43        | 9.95            |
| [P0A2H9]DSBA_SALTY Thiol:disulfide interchange protein dsbA | 1            |                      | YQINPQGMdTSSMDVFVQQYADTVK  | 176                    | 25                      | 21                       | 84.91         | b2*b2b3b4*b4b6*b6b10b12b14b16y1y4y5y6y7*y7y9*y9y14y25                                                                                                                                                                                                                                    | 2865.30            | 87.130               | 96740     | 3 | 955.77        | -1.19           |
| [P0A2H9]DSBA_SALTY Thiol:disulfide interchange protein dsbA | 2            |                      | AAADLQLQGVPMFVNGK          | 158                    | 18                      | 25                       | 141.67        | b2b4b5 <b>°</b> b5b6*b6b7*b7b10b15y2y3y4*y4y5*y5y6y7y8y10y11*y11y12*y12y18                                                                                                                                                                                                               | 1829.96            | 81.356               | 87099     | 2 | 915.48        | 2.40            |
| [P0A2H9]DSBA_SALTY Thiol:disulfide interchange protein dsbA | 3            |                      | TQTVQSAADIR                | 116                    | 11                      | 12                       | 56.5          | b2b3 <b>°</b> b3*b3b8y2y4y5y7*y7y9y11                                                                                                                                                                                                                                                    | 1189.61            | 35.779               | 40413     | 2 | 595.31        | -4.82           |
| [P0A2H9]DSBA_SALTY Thiol:disulfide interchange protein dsbA | 4            |                      | ELTQAWAVAMALGVEDK          | 88                     | 17                      | 4                        | 20.96         | b4y3y6y8                                                                                                                                                                                                                                                                                 | 1831.92            | 61.048               | 7582      | 2 | 916.47        | -0.80           |
| [P0A2H9]DSBA_SALTY Thiol:disulfide interchange protein dsbA | 5            |                      | YHVEFLGPLGK                | 77                     | 11                      | 3                        | 22.75         | b8y5y6                                                                                                                                                                                                                                                                                   | 1259.69            | 74.130               | 6635      | 2 | 630.35        | 5.33            |

|                                                            |    |                      |                             |     |    |    |        |                                                                                                         |         |         |        |   |         |        |
|------------------------------------------------------------|----|----------------------|-----------------------------|-----|----|----|--------|---------------------------------------------------------------------------------------------------------|---------|---------|--------|---|---------|--------|
| P0A2H9 DSBA_SALTY Thiol:disulfide interchange protein dsbA | 6  | Oxidation+M(10)      | ELTQAWAVAMALGVEDK           | 88  | 17 | 5  | 13.09  | b14°b14*b14y7y11                                                                                        | 1847.91 | 70.006  | 4874   | 3 | 616.64  | -7.86  |
| P0A2H9 DSBA_SALTY Thiol:disulfide interchange protein dsbA | 7  | Oxidation+M(13)      | YQINPQGMDTSSMDVVFVQQYAD TVK | 176 | 25 | 7  | 26.09  | b3b7b11y8y9*y9y15                                                                                       | 2881.28 | 74.102  | 1908   | 2 | 1441.14 | -9.15  |
| P0A1D5 CH10_SALTY 10 kDa chaperonin                        | 1  |                      | ILDNGTVQPLDVK               | 47  | 13 | 22 | 125.27 | b2b8*b8b10*b10b11b13y2y3y5y6°y6*y6y7y8y9y10y11°y11*y11y12y13                                            | 1411.77 | 57.893  | 344098 | 2 | 706.39  | -3.20  |
| P0A1D5 CH10_SALTY 10 kDa chaperonin                        | 2  |                      | VGDIVIFNDGYGVK              | 60  | 14 | 30 | 200.39 | b2b3b4b5°b5b6b10°b10b11*b11b13*b13y1y2y3y4y5y6°y6y7y8y9y10*y10y11*y11y12y13*y13y14                      | 1495.78 | 74.169  | 206209 | 2 | 748.39  | -0.82  |
| P0A1D5 CH10_SALTY 10 kDa chaperonin                        | 3  |                      | SAGGIVLTGSAAGK              | 20  | 14 | 16 | 84.66  | b2b3°b3b5°b5b14°b14y2y3y6y7y8y9y11y12y14                                                                | 1188.65 | 44.162  | 160184 | 2 | 594.83  | -7.91  |
| P0A1D5 CH10_SALTY 10 kDa chaperonin                        | 4  |                      | GEIIAVGK                    | 37  | 8  | 9  | 42.12  | b2°b2b3°b3y2y3y4y6y8                                                                                    | 786.47  | 41.684  | 7740   | 1 | 786.47  | -8.77  |
| P0A1D5 CH10_SALTY 10 kDa chaperonin                        | 5  |                      | IDNEEVLIMSESDILAIVEA        | 77  | 20 | 8  | 25.72  | b3b4b7°b7°b7b11y11°y11                                                                                  | 2203.10 | 136.439 | 3146   | 2 | 1102.06 | -0.33  |
| P0A1D5 CH10_SALTY 10 kDa chaperonin                        | 6  |                      | SIRPLHDR                    | 1   | 8  | 6  | 49.9   | b3°b3b5b7y5°y5                                                                                          | 993.55  | 28.964  | 2407   | 2 | 497.28  | -8.97  |
| P0A1D5 CH10_SALTY 10 kDa chaperonin                        | 7  |                      | SAGGIVLTGSAAGK              | 20  | 14 | 1  | 7.36   | b4                                                                                                      | 1170.64 | 44.114  | 29992  | 2 | 585.83  | -0.10  |
| P0A1H5 EFTU_SALTY Elongation factor Tu                     | 1  |                      | AIDKPFLPIEDVFSISGR          | 205 | 19 | 19 | 113.26 | b2b4b6b7b8b13y1y2y3y4y5y6°y6y7y8°y8y9°y9y11                                                             | 2117.15 | 105.745 | 614047 | 3 | 706.39  | -6.80  |
| P0A1H5 EFTU_SALTY Elongation factor Tu                     | 2  |                      | TTLTAAITTVLAK               | 25  | 13 | 15 | 97.25  | b2°b2b3°b3b13y2y3y5y6y7y8y9y10y11y13                                                                    | 1303.78 | 85.311  | 404512 | 2 | 652.39  | -5.80  |
| P0A1H5 EFTU_SALTY Elongation factor Tu                     | 3  |                      | IIELAGFLDSYIPEPER           | 188 | 17 | 28 | 168.47 | b2b3b5b6b7b11°b11b12°b12b14y1y2y3°y3y4°y4y5y6y8°y8y9y10y11y12°y12y13°y13y17                             | 1962.03 | 102.600 | 347104 | 2 | 981.52  | 4.48   |
| P0A1H5 EFTU_SALTY Elongation factor Tu                     | 4  |                      | GITINTSHVEYDTPTR            | 59  | 16 | 22 | 157.1  | b2b3°b3b12°b12b13y2y3y4y5y6y7y8y9°y9y10°y10y11y12y13y14y16                                              | 1803.87 | 50.092  | 342064 | 3 | 601.96  | -11.30 |
| P0A1H5 EFTU_SALTY Elongation factor Tu                     | 5  |                      | TTDVTGTIELPEGVEMVMPGDNI K   | 334 | 24 | 37 | 191.81 | b2°b2b3°b3b4b5°b5b8°b8b10°b10b11b13b14b16y3y4y5y6°y6°y6y7°y7y8y9°y9*y9y10°y10y12°y12y14°y14y15y16y20y24 | 2546.24 | 87.290  | 294106 | 2 | 1273.62 | 2.21   |
| P0A1H5 EFTU_SALTY Elongation factor Tu                     | 6  |                      | QVGVPYIIVFLNK               | 124 | 13 | 10 | 64.54  | b3b4°b4b13y4y5y6y9y11y13                                                                                | 1489.87 | 99.768  | 291844 | 2 | 745.44  | -1.97  |
| P0A1H5 EFTU_SALTY Elongation factor Tu                     | 7  |                      | ELLSQYDFPGDDTPIVR           | 155 | 17 | 20 | 154.72 | b2b3°b3b5°b5b6b7y1y3y4y5y6y8y9y10y11y12y13y14y17                                                        | 1964.96 | 77.410  | 255876 | 2 | 982.98  | -1.86  |
| P0A1H5 EFTU_SALTY Elongation factor Tu                     | 8  |                      | ALEGDAEWEAK                 | 177 | 11 | 17 | 86     | b1b2b4°b4y1y2y4°y4y5y6y7y8y9°y9y10°y10y11                                                               | 1218.56 | 46.826  | 161333 | 2 | 609.78  | -5.11  |
| P0A1H5 EFTU_SALTY Elongation factor Tu                     | 9  | Carbamidomethyl+C(3) | STCTGVEMFR                  | 253 | 10 | 9  | 59.4   | b1b2y2y3y4y6y7y8y10                                                                                     | 1187.51 | 53.409  | 111210 | 2 | 594.26  | -4.93  |
| P0A1H5 EFTU_SALTY Elongation factor Tu                     | 10 | Carbamidomethyl+C(1) | CDMVDDEELLELVEMEV           | 137 | 18 | 9  | 37.51  | b2b3y2y3y5y6y8y11y18                                                                                    | 2224.00 | 106.657 | 70110  | 2 | 1112.51 | 10.21  |

|                                                      |    |                       |                                 |     |    |    |        |                                                                |         |         |        |   |         |        |
|------------------------------------------------------|----|-----------------------|---------------------------------|-----|----|----|--------|----------------------------------------------------------------|---------|---------|--------|---|---------|--------|
| P0A1H5 EFTU_SALTY Elongation factor Tu               | 11 |                       | VGEEVEIVGIK                     | 238 | 11 | 6  | 31.78  | b7b10y2y3y4y11                                                 | 1171.66 | 45.490  | 9476   | 2 | 586.33  | 4.27   |
| P0A1H5 EFTU_SALTY Elongation factor Tu               | 12 | Carbamidomethyl+C(7)  | HYAHVDCPGHADYVK                 | 75  | 15 | 6  | 20.49  | b2b4y2y4y5°y5                                                  | 1768.78 | 37.149  | 7099   | 3 | 590.26  | -5.25  |
| P0A1H5 EFTU_SALTY Elongation factor Tu               | 13 |                       | MVVTLIHPIAMDDGLR                | 358 | 16 | 18 | 164.67 | b3b5°b5b6b11y3y4y5y7y8y9y10°y10y11y12y13y14y15                 | 1780.91 | 79.829  | 693116 | 3 | 594.31  | -17.55 |
| P0A1H5 EFTU_SALTY Elongation factor Tu               | 14 |                       | AGENVGVLLR                      | 270 | 10 | 16 | 112.64 | b4°b4b5°b5°b5b6b7°b7°b7y3y4y5y6y7y9*y9                         | 1027.57 | 56.838  | 297453 | 2 | 514.29  | -16.87 |
| P0A1H5 EFTU_SALTY Elongation factor Tu               | 15 |                       | TVGAGVVAK                       | 382 | 9  | 8  | 81.27  | b3b4°b4b7y3y5y7y8                                              | 801.47  | 28.902  | 191193 | 2 | 401.24  | -19.88 |
| P0A1H5 EFTU_SALTY Elongation factor Tu               | 16 |                       | NMITGAAQMDGAILVVAATDGPMPQTR     | 90  | 27 | 6  | 12.37  | b16b22y7°y7y9°y9                                               | 2729.40 | 97.703  | 30466  | 4 | 683.11  | 22.45  |
| P0A1H5 EFTU_SALTY Elongation factor Tu               | 17 |                       | LLDEGR                          | 264 | 6  | 3  | 34.38  | y3y4y5                                                         | 702.37  | 27.102  | 10748  | 1 | 702.37  | -6.60  |
| P0A1H5 EFTU_SALTY Elongation factor Tu               | 18 |                       | GYRPQFYFR                       | 325 | 9  | 4  | 41.04  | b3b5°b5b8                                                      | 1233.61 | 60.660  | 8764   | 2 | 617.31  | -3.86  |
| P0A1H5 EFTU_SALTY Elongation factor Tu               | 19 |                       | TKPHVNVGTIGHVDHGK               | 8   | 17 | 7  | 54.83  | y3y5y6°y6y7y8y12                                               | 1795.92 | 38.122  | 1735   | 2 | 898.46  | -19.71 |
| P0A1H5 EFTU_SALTY Elongation factor Tu               | 20 |                       | GTVVTGRVER                      | 224 | 10 | 3  | 22.12  | b3b5y6                                                         | 1073.60 | 26.626  | 46178  | 2 | 537.30  | -10.35 |
| P0A1H5 EFTU_SALTY Elongation factor Tu               | 21 | Carbamidomethyl+C(14) | QVGVPYIIVFLNKCDMVDDEELLE LVEMEV | 124 | 31 | 12 | 60.43  | b4°b4b6°b6b16y4y5y6y7y8y12y27                                  | 3694.86 | 127.777 | 45053  | 3 | 1232.29 | 3.57   |
| P0A1H5 EFTU_SALTY Elongation factor Tu               | 22 |                       | ELLSQYDFPGDDTPIVRGSALK          | 155 | 22 | 3  | 11.33  | b6b9y13                                                        | 2421.26 | 68.468  | 21413  | 3 | 807.76  | 11.70  |
| P0A1H5 EFTU_SALTY Elongation factor Tu               | 23 |                       | DEGGRHTPFKK                     | 314 | 11 | 3  | 19.74  | b3b10y3                                                        | 1290.63 | 59.806  | 7391   | 2 | 645.82  | 3.50   |
| P0A1H5 EFTU_SALTY Elongation factor Tu               | 24 |                       | HTPFFKGYRPQFYFR                 | 319 | 15 | 5  | 23.8   | b4°b4b7b9y4                                                    | 1991.02 | 74.172  | 3078   | 3 | 664.35  | 8.15   |
| P0A1H5 EFTU_SALTY Elongation factor Tu               | 25 |                       | ARGITINTSHVEYDTPTR              | 57  | 18 | 5  | 21.61  | b10y9y11°y11y12                                                | 2031.02 | 67.889  | 1916   | 3 | 677.68  | -4.63  |
| P0A1H5 EFTU_SALTY Elongation factor Tu               | 26 | Phosphoryl STY(9)     | GQVLAKPGTIKPTK                  | 289 | 15 | 4  | 23.8   | b9y5y8y11                                                      | 1654.91 | 58.447  | 35449  | 3 | 552.31  | 9.96   |
| P0A1H5 EFTU_SALTY Elongation factor Tu               | 27 | Oxidation+M(1)        | MVVTLIHPIAMDDGLR                | 358 | 16 | 3  | 22.09  | y3y9y10                                                        | 1796.91 | 74.297  | 22441  | 3 | 599.64  | -14.81 |
| P0A1H5 EFTU_SALTY Elongation factor Tu               | 28 | Oxidation+M(18)       | TTDVTGTIELPEGVEMVMPGDNI K       | 334 | 24 | 4  | 13.24  | b3b12y4y8                                                      | 2562.25 | 80.048  | 3840   | 2 | 1281.63 | 8.58   |
| P0A1H5 EFTU_SALTY Elongation factor Tu               | 29 |                       | TINTSHVEYDTPTR                  | 61  | 14 | 4  | 29.66  | b4b10b11b13                                                    | 1633.79 | 50.064  | 19045  | 2 | 817.40  | 4.03   |
| P0A1H5 EFTU_SALTY Elongation factor Tu               | 30 |                       | GITINTSHVEYDTPTR                | 59  | 16 | 1  | 7.74   | y11                                                            | 1785.87 | 50.090  | 21472  | 3 | 595.96  | -3.42  |
| Q7CQ05 GRCA_SALTY Autonomous glycyl radical cofactor | 1  |                       | SGFAEDEVVAVSK                   | 35  | 13 | 7  | 37.48  | b3y2y3y4y8y10y13                                               | 1337.65 | 54.885  | 215051 | 2 | 669.33  | -2.83  |
| Q7CQ05 GRCA_SALTY Autonomous glycyl radical cofactor | 2  |                       | LGEIEYR                         | 48  | 7  | 7  | 54.5   | b3y2y3y4y5y6y7                                                 | 879.44  | 42.732  | 169371 | 2 | 440.23  | -13.81 |
| Q7CQ05 GRCA_SALTY Autonomous glycyl radical cofactor | 3  |                       | FNSLTPEQQR                      | 106 | 10 | 25 | 123.89 | b2°b2b3°b3°b3b4°b4b5b8°b8y2*y2y3*y3y4°y4y5*y5y6y7°y7y8°y8y9y10 | 1219.60 | 38.583  | 111298 | 2 | 610.31  | -2.30  |
| Q7CQ05 GRCA_SALTY Autonomous glycyl radical cofactor | 4  |                       | EIPMEVKPEVR                     | 55  | 11 | 13 | 79.97  | b2b5b9b10y1y2y4y6y7y8°y8y9y11                                  | 1326.71 | 48.893  | 59877  | 2 | 663.86  | 2.58   |
| Q7CQ05 GRCA_SALTY Autonomous glycyl radical cofactor | 5  |                       | VSGYAVR                         | 99  | 7  | 5  | 32     | b4y2y5y6y7                                                     | 751.40  | 27.733  | 40491  | 2 | 376.20  | -14.54 |
| Q7CQ05 GRCA_SALTY Autonomous glycyl radical cofactor | 6  |                       | FNSLTPEQQRDVIA                  | 106 | 15 | 15 | 47.34  | b2°b2b3°b3b7b8°b8°b8y6y8*y8y10*y10y11y15                       | 1773.90 | 47.940  | 34680  | 3 | 591.97  | -12.94 |
| Q7CQ05 GRCA_SALTY Autonomous glycyl radical cofactor | 7  |                       | LGEIEYREIPMEVKPEVR              | 48  | 18 | 5  | 16.78  | b9b12y4y11y18                                                  | 2187.15 | 64.437  | 25829  | 3 | 729.72  | -0.22  |

|                                                      |    |                       |                                    |     |    |    |        |                                                                              |         |         |        |   |         |        |
|------------------------------------------------------|----|-----------------------|------------------------------------|-----|----|----|--------|------------------------------------------------------------------------------|---------|---------|--------|---|---------|--------|
| Q7CQ05 GRCA_SALTY Autonomous glycyI radical cofactor | 8  |                       | MITGIQITK                          | 0   | 9  | 4  | 33.25  | y3y4*y4y6                                                                    | 1004.57 | 55.480  | 211127 | 2 | 502.79  | -15.19 |
| Q7CQ05 GRCA_SALTY Autonomous glycyI radical cofactor | 9  |                       | VEGGQHNLNVNVLRR                    | 66  | 13 | 6  | 50.49  | y4*y4y6y7y8y12                                                               | 1434.76 | 50.846  | 151307 | 3 | 478.92  | -17.44 |
| Q7CQ05 GRCA_SALTY Autonomous glycyI radical cofactor | 10 |                       | TFTESL                             | 121 | 6  | 1  | 11.88  | y4                                                                           | 697.34  | 41.344  | 5425   | 1 | 697.34  | -0.26  |
| Q7CQ05 GRCA_SALTY Autonomous glycyI radical cofactor | 11 |                       | ETLEDAVK                           | 80  | 8  | 4  | 35.64  | y4y6y7°y7                                                                    | 904.45  | 54.319  | 4255   | 2 | 452.73  | -9.99  |
| Q7CQ05 GRCA_SALTY Autonomous glycyI radical cofactor | 12 |                       | AANDDLLNSFWLLDSEKGEAR              | 9   | 21 | 24 | 213.14 | b3b4b5°b5*b5b7*b7y3y4y5y7y8°y8y9y10y11y12y13y14y15y16y17y18y19               | 2364.14 | 93.386  | 381989 | 3 | 788.72  | -2.48  |
| Q7CQ05 GRCA_SALTY Autonomous glycyI radical cofactor | 13 |                       | RETLEDAVK                          | 79  | 9  | 5  | 37.97  | b3b5y5°y5y8                                                                  | 1060.57 | 32.876  | 28365  | 2 | 530.79  | 5.76   |
| Q7CQ05 GRCA_SALTY Autonomous glycyI radical cofactor | 14 | Carbamidomethyl+C(5)  | GEARCIVAK                          | 26  | 9  | 3  | 25.47  | b4b7y3                                                                       | 1003.55 | 39.677  | 17162  | 2 | 502.28  | 12.35  |
| Q7CQ05 GRCA_SALTY Autonomous glycyI radical cofactor | 15 |                       | VEGGQHNLNVNVLRR                    | 66  | 14 | 8  | 50.61  | b4b5b6b7°b7b9°b9y3                                                           | 1590.88 | 46.824  | 9225   | 2 | 795.94  | -3.53  |
| Q7CQ05 GRCA_SALTY Autonomous glycyI radical cofactor | 16 |                       | LGEIEYREIPMEVKPEVR                 | 48  | 18 | 3  | 19.99  | b7b8y11                                                                      | 2187.18 | 109.397 | 4827   | 3 | 729.73  | 13.73  |
| Q7CQ05 GRCA_SALTY Autonomous glycyI radical cofactor | 17 |                       | SGFAEDEVVAVSKLGEIEYR               | 35  | 20 | 4  | 11.82  | b4b12y3°y3                                                                   | 2198.10 | 101.281 | 3912   | 2 | 1099.55 | 1.56   |
| Q7CQ05 GRCA_SALTY Autonomous glycyI radical cofactor | 18 |                       | FNSLTPEQQRDVIAAR                   | 106 | 15 | 6  | 23.8   | b3b4*b4b6y11*y11                                                             | 1773.93 | 69.070  | 2262   | 3 | 591.98  | 1.65   |
| Q7CQ05 GRCA_SALTY Autonomous glycyI radical cofactor | 19 |                       | VSGYAVRFNSLTPEQQR                  | 99  | 17 | 5  | 20.96  | b4b6b13*b13y11                                                               | 1951.99 | 103.368 | 2166   | 3 | 651.33  | -6.13  |
| Q7CQ05 GRCA_SALTY Autonomous glycyI radical cofactor | 20 | Phosphoryl STY(2)     | ITGIQITK                           | 1   | 8  | 4  | 27.86  | b6y6y7*y7                                                                    | 953.49  | 32.034  | 12293  | 2 | 477.25  | -5.95  |
| Q7CQ05 GRCA_SALTY Autonomous glycyI radical cofactor | 21 |                       | PMEVKPEVR                          | 57  | 9  | 1  | 7.24   | b3                                                                           | 1084.58 | 48.928  | 42237  | 2 | 542.79  | -5.40  |
| Q7CQ05 GRCA_SALTY Autonomous glycyI radical cofactor | 22 |                       | EIPMEVKPEVR                        | 55  | 11 | 0  | 3.77   |                                                                              | 1308.67 | 48.916  | 12768  | 3 | 436.90  | -14.92 |
| P64076 ENO_SALTY Enolase                             | 1  |                       | FNQIGSLTETLAAIK                    | 342 | 15 | 30 | 186.76 | b2*b2b3*b3b4*b4b5*b5b6*b6b7°b7*b7b9*b9b14y1y2y3y4y5y6y7y8y10y11y12y13y15*y15 | 1605.88 | 86.397  | 344419 | 2 | 803.44  | -1.90  |
| P64076 ENO_SALTY Enolase                             | 2  |                       | SGETEDATIADLAVGTAAGQIK             | 371 | 22 | 28 | 177.88 | b2b3b4b9°b9b11b14°b14b15b16b18y1y2y4y5*y5y6y7y8y9y10y12y13*y13y14y16y17y22   | 2118.06 | 75.939  | 201569 | 2 | 1059.53 | 2.42   |
| P64076 ENO_SALTY Enolase                             | 3  |                       | AVGAVNGPIAQAILGK                   | 66  | 16 | 9  | 48.92  | b2b3b5y3y5y10y11y12y16                                                       | 1478.86 | 75.749  | 175090 | 2 | 739.94  | -3.38  |
| P64076 ENO_SALTY Enolase                             | 4  |                       | GMNTAVGDEGGYAPNLGSNAEALAVIAEAVK    | 200 | 31 | 18 | 111.16 | b2b4b5°b5b13y2y3y4y5y6y7y8y9y10y14y18y19y31                                  | 2989.46 | 95.608  | 171689 | 3 | 997.16  | 2.53   |
| P64076 ENO_SALTY Enolase                             | 5  |                       | GIANSILIK                          | 333 | 9  | 5  | 33.25  | b2y3y6y7y9                                                                   | 928.57  | 61.321  | 169153 | 2 | 464.79  | -12.36 |
| P64076 ENO_SALTY Enolase                             | 6  |                       | YSMPVPMNINIINGEHADNNVDIQEFMIQPVGAK | 143 | 34 | 17 | 86.27  | b2°b2b3°b3b4b5b23y3y5y6y7y8y9y13y29y31y34                                    | 3759.77 | 99.031  | 108861 | 3 | 1253.93 | 2.79   |
| P64076 ENO_SALTY Enolase                             | 7  | Carbamidomethyl+C(16) | AAGYELGKIDITLAMDCAASEFYKDGK        | 231 | 26 | 10 | 33.48  | b2b4b6b9b15y3y6y9y11y26                                                      | 2824.29 | 100.624 | 74715  | 4 | 706.83  | -10.98 |
| P64076 ENO_SALTY Enolase                             | 8  |                       | IQLVGDDLFTVNTNK                    | 311 | 14 | 14 | 50.61  | b2*b2b3b14y2y4°y4y5°y5*y5y10y11y12y14                                        | 1562.85 | 78.221  | 65825  | 2 | 781.93  | 4.06   |
| P64076 ENO_SALTY Enolase                             | 9  |                       | GMPLYEHIAELNGTPGK                  | 126 | 17 | 7  | 28.53  | b2y2y3y6*y6y7y9                                                              | 1826.89 | 67.950  | 50772  | 3 | 609.64  | -9.02  |
| P64076 ENO_SALTY Enolase                             | 10 |                       | DAGYTAVISHR                        | 360 | 11 | 12 | 94.24  | b2b3b4b7y3y4y5y6y7°y7y9y11                                                   | 1189.59 | 42.362  | 46686  | 2 | 595.30  | -2.67  |

|                                                          |    |  |                                          |     |    |    |        |                                                                                                                                                            |         |         |        |   |         |        |
|----------------------------------------------------------|----|--|------------------------------------------|-----|----|----|--------|------------------------------------------------------------------------------------------------------------------------------------------------------------|---------|---------|--------|---|---------|--------|
| P64076 ENO_SALTY Enolase                                 | 11 |  | QYPIVSIEDGLDESDWDGFAYQTK                 | 282 | 24 | 9  | 34.09  | b6°b6b10b11y1y4y6y8y9                                                                                                                                      | 2776.28 | 94.397  | 46000  | 2 | 1388.64 | 6.68   |
| P64076 ENO_SALTY Enolase                                 | 12 |  | ILKEGIEK                                 | 325 | 8  | 10 | 53.37  | b2b7y2°y2y3y4y5°y5y6y8                                                                                                                                     | 929.56  | 30.240  | 37958  | 2 | 465.28  | -11.36 |
| P64076 ENO_SALTY Enolase                                 | 13 |  | GNPTVEAEVHLEGGFVGMAAAPS<br>GASTGSR       | 16  | 30 | 10 | 35.33  | b6b8b10y5°y5y6y7°y7y24y<br>30                                                                                                                              | 2856.37 | 92.652  | 25329  | 3 | 952.80  | 4.36   |
| P64076 ENO_SALTY Enolase                                 | 14 |  | AAGYELGK                                 | 231 | 8  | 9  | 55.13  | b1b3b4b5b8y2y6°y6y7                                                                                                                                        | 808.41  | 31.999  | 12079  | 2 | 404.71  | -12.76 |
| P64076 ENO_SALTY Enolase                                 | 15 |  | EALELRDGDK                               | 46  | 10 | 4  | 22.12  | b7y2y3y6                                                                                                                                                   | 1145.58 | 34.579  | 11573  | 2 | 573.29  | -3.52  |
| P64076 ENO_SALTY Enolase                                 | 16 |  | SNFGANAILAVSLANAK                        | 103 | 17 | 5  | 20.5   | b2°b2b4b8b11                                                                                                                                               | 1660.88 | 79.160  | 3232   | 2 | 830.94  | -11.98 |
| P64076 ENO_SALTY Enolase                                 | 17 |  | IMIDLDGTENK                              | 92  | 11 | 7  | 30.2   | b7y5y8°y8y9°y9*y9                                                                                                                                          | 1248.64 | 59.682  | 23523  | 2 | 624.82  | 17.70  |
| P64076 ENO_SALTY Enolase                                 | 18 |  | AFTSEEFTHFLEELTK                         | 266 | 16 | 3  | 13.71  | b6y5y11                                                                                                                                                    | 1928.91 | 58.259  | 4385   | 3 | 643.64  | -8.16  |
| P64076 ENO_SALTY Enolase                                 | 19 |  | IEEALGEK                                 | 411 | 8  | 6  | 58.14  | b4°b4b6y3y4y7                                                                                                                                              | 888.46  | 60.580  | 3835   | 1 | 888.46  | -3.02  |
| P64076 ENO_SALTY Enolase                                 | 20 |  | APYNGR                                   | 419 | 6  | 1  | 11.88  | b4                                                                                                                                                         | 677.33  | 46.731  | 2198   | 1 | 677.33  | -9.82  |
| P64076 ENO_SALTY Enolase                                 | 21 |  | VLGDKIQLVGDDLFVTNTK                      | 306 | 19 | 8  | 50.85  | b3b4y4y5y6y10°y10y13                                                                                                                                       | 2075.12 | 80.579  | 58304  | 3 | 692.38  | -9.29  |
| P64076 ENO_SALTY Enolase                                 | 22 |  | GKGMNTAVGDEGGYAPNLGSNA<br>EALAVIAEAVK    | 198 | 33 | 10 | 56.39  | b4b7b9b14b15y3y4y5y25y<br>26                                                                                                                               | 3174.58 | 90.598  | 48617  | 3 | 1058.87 | 2.31   |
| P64076 ENO_SALTY Enolase                                 | 23 |  | EIIDSRGNPTVEAEVHLEGGFVGMA<br>AAPSGASTGSR | 10  | 36 | 4  | 17.59  | y4y11°y11y21                                                                                                                                               | 3569.75 | 93.685  | 21948  | 4 | 893.19  | 4.51   |
| P64076 ENO_SALTY Enolase                                 | 24 |  | DQAGIDKIMIDLDGTENK                       | 85  | 18 | 6  | 27.72  | b5y4°y4y5y7y11                                                                                                                                             | 1975.96 | 75.349  | 19686  | 2 | 988.48  | -2.72  |
| P64076 ENO_SALTY Enolase                                 | 25 |  | AAAAAKGMPLYEHIAELNGTPGK                  | 120 | 23 | 3  | 11.17  | b11y5y13                                                                                                                                                   | 2310.23 | 67.919  | 3672   | 2 | 1155.62 | 15.01  |
| P64076 ENO_SALTY Enolase                                 | 26 |  | EALELRDGDK                               | 46  | 10 | 5  | 34.34  | b7b8y5°y5y7                                                                                                                                                | 1145.57 | 66.247  | 2020   | 2 | 573.29  | -4.80  |
| P64076 ENO_SALTY Enolase                                 | 27 |  | DGKYVLAGEGNK                             | 254 | 12 | 5  | 17.94  | b9°b9b11°b11y3                                                                                                                                             | 1250.65 | 46.009  | 1714   | 3 | 417.56  | 12.98  |
| P64076 ENO_SALTY Enolase                                 | 28 |  | ANSILIK                                  | 335 | 7  | 3  | 7.74   | b3°b3*b3                                                                                                                                                   | 758.48  | 61.328  | 29714  | 1 | 758.48  | -0.97  |
| P64076 ENO_SALTY Enolase                                 | 29 |  | GYTAVISHR                                | 362 | 9  | 0  | 3.77   |                                                                                                                                                            | 1003.53 | 42.357  | 16304  | 2 | 502.27  | -1.58  |
| P64076 ENO_SALTY Enolase                                 | 30 |  | YSMPVPMMNININGGEHA                       | 143 | 17 | 2  | 26.24  | y13y14                                                                                                                                                     | 1860.84 | 99.032  | 3109   | 3 | 620.95  | -4.13  |
| P0A1P0 G3P1_SALTY Glyceraldehyde-3-phohate dehydrogenase | 1  |  | VINDNFGIIEGLMTTVHATTATQK                 | 160 | 24 | 47 | 282.53 | b2b3b4°b4*b4b5°b5*b5b6<br>*b6b7°b7*b7b8*b8b14y3y<br>4y5y6y7°y7*y7y8°y8*y8y9<br>y10y11y13y14*y14y15°y15<br>*y15y16*y16y17y18°y18y2<br>0y21y22°y22y23y24*y24 | 2574.32 | 98.645  | 578353 | 3 | 858.78  | -1.61  |
| P0A1P0 G3P1_SALTY Glyceraldehyde-3-phohate dehydrogenase | 2  |  | AGIALNDNFVK                              | 296 | 11 | 17 | 97.25  | b3b4b8b10y1y2y3y4*y4y6<br>*y6y7*y7y8*y8y11*y11                                                                                                             | 1161.62 | 61.938  | 295826 | 2 | 581.31  | -6.83  |
| P0A1P0 G3P1_SALTY Glyceraldehyde-3-phohate dehydrogenase | 3  |  | GASQNIIPSSTGA AK                         | 198 | 15 | 19 | 138.23 | b3b5*b5b6*b6b7*b7b13b1<br>4y2y3y4y5y7y8y9y10y11y<br>15                                                                                                     | 1401.73 | 41.353  | 222665 | 2 | 701.37  | -4.09  |
| P0A1P0 G3P1_SALTY Glyceraldehyde-3-phohate dehydrogenase | 4  |  | AATYEQIK                                 | 249 | 8  | 17 | 80.64  | b1b3b7°b7y2y3*y3y4*y4y<br>5*y5y6°y6*y6y7*y7y8                                                                                                              | 923.47  | 31.524  | 190707 | 2 | 462.24  | -13.42 |
| P0A1P0 G3P1_SALTY Glyceraldehyde-3-phohate dehydrogenase | 5  |  | SDIEIVAINDLLDAEY MAYMLK                  | 24  | 22 | 13 | 54.77  | b2b5b6b7b10*b10y3y4y9y<br>11°y11y14y22                                                                                                                     | 2530.24 | 127.188 | 127056 | 3 | 844.09  | -1.93  |
| P0A1P0 G3P1_SALTY Glyceraldehyde-3-phohate dehydrogenase | 6  |  | VPTPNVSVVDLTVR                           | 232 | 14 | 10 | 78.34  | b3y2y4y5y6y7y8y11y12y1<br>4                                                                                                                                | 1495.84 | 71.538  | 112222 | 2 | 748.42  | -4.24  |
| P0A1P0 G3P1_SALTY Glyceraldehyde-3-phohate dehydrogenase | 7  |  | VVLTGPSKDNTMPFVK                         | 116 | 16 | 9  | 50.78  | b1b2b3y5y7y9y11y14y16                                                                                                                                      | 1732.91 | 58.141  | 69223  | 3 | 578.31  | -14.16 |
| P0A1P0 G3P1_SALTY Glyceraldehyde-3-phohate dehydrogenase | 8  |  | VLDLIAHISK                               | 321 | 10 | 7  | 59.4   | b2y2y3y4y5y6y8                                                                                                                                             | 1108.66 | 66.190  | 51401  | 2 | 554.84  | -7.93  |
| P0A1P0 G3P1_SALTY Glyceraldehyde-3-phohate dehydrogenase | 9  |  | TVDGPSHKDWR                              | 184 | 11 | 9  | 54.46  | b1b4b5b9y3y5y8°y8y11                                                                                                                                       | 1297.63 | 29.012  | 8573   | 2 | 649.32  | -0.66  |

|                                                          |    |                                                      |                                      |     |    |    |       |                                                                                                                          |         |         |        |   |         |        |
|----------------------------------------------------------|----|------------------------------------------------------|--------------------------------------|-----|----|----|-------|--------------------------------------------------------------------------------------------------------------------------|---------|---------|--------|---|---------|--------|
| P0A1P0 G3P1_SALTY Glyceraldehyde-3-phohate dehydrogenase | 10 |                                                      | VLPELNGK                             | 217 | 8  | 6  | 42.12 | b3y3y4*y4y6°y6                                                                                                           | 869.49  | 45.307  | 65844  | 2 | 435.25  | -17.69 |
| P0A1P0 G3P1_SALTY Glyceraldehyde-3-phohate dehydrogenase | 11 |                                                      | DNTPMFVK                             | 124 | 8  | 3  | 35.64 | y5y6y7                                                                                                                   | 951.46  | 48.869  | 41894  | 2 | 476.24  | 4.23   |
| P0A1P0 G3P1_SALTY Glyceraldehyde-3-phohate dehydrogenase | 12 | Carbamidomethyl+C(12)<br>;Carbamidomethyl+C(16)<br>) | YEGQDIVSNASCTTNCLAPLAK               | 138 | 22 | 4  | 20.15 | b9y7y10y11                                                                                                               | 2412.13 | 73.301  | 8461   | 3 | 804.71  | 4.76   |
| P0A1P0 G3P1_SALTY Glyceraldehyde-3-phohate dehydrogenase | 13 |                                                      | LVSWYDNETGYSNK                       | 307 | 14 | 5  | 23.17 | y4*y4y6*y6y7                                                                                                             | 1675.78 | 41.161  | 7575   | 2 | 838.39  | 11.07  |
| P0A1P0 G3P1_SALTY Glyceraldehyde-3-phohate dehydrogenase | 14 | Carbamidomethyl+C(18)<br>;Carbamidomethyl+C(22)<br>) | GANFDKYEGQDIVSNASCTTNCLAPLAK         | 132 | 28 | 35 | 223.1 | b4*b4b5b7b8b10*b10b11°<br>b11*b11b12*b12b13b15b1<br>6*b16b24*b24b26b27y3y4<br>y5y6y8y9y10y11y12°y12y1<br>4*y14y15*y15y16 | 3044.41 | 67.391  | 312262 | 3 | 1015.48 | 0.80   |
| P0A1P0 G3P1_SALTY Glyceraldehyde-3-phohate dehydrogenase | 15 |                                                      | VINDNFGIIEGLMTTVHATTATQK<br>TVDGPSHK | 160 | 32 | 3  | 22.24 | b5b6y13                                                                                                                  | 3395.72 | 79.548  | 6020   | 4 | 849.69  | -0.86  |
| P0A1P0 G3P1_SALTY Glyceraldehyde-3-phohate dehydrogenase | 16 |                                                      | TVDGPSHKDWR                          | 184 | 11 | 5  | 30.2  | b9y4y5°y5y9                                                                                                              | 1297.62 | 30.706  | 5530   | 3 | 433.21  | -6.59  |
| P0A1P0 G3P1_SALTY Glyceraldehyde-3-phohate dehydrogenase | 17 |                                                      | GGRGASQNIIPSSTGAAK                   | 195 | 18 | 16 | 98.95 | b5b6b7b8°b8*b8b9*b9b11<br>b15y3y4y8y9°y9y13                                                                              | 1671.88 | 37.178  | 4893   | 2 | 836.45  | 4.38   |
| P0A1P0 G3P1_SALTY Glyceraldehyde-3-phohate dehydrogenase | 18 |                                                      | KHITAGAK                             | 107 | 8  | 3  | 43.42 | y3y5y7                                                                                                                   | 825.48  | 12.671  | 4601   | 2 | 413.25  | -13.38 |
| P0A1P0 G3P1_SALTY Glyceraldehyde-3-phohate dehydrogenase | 19 |                                                      | DNTPMFVKGANFDK                       | 124 | 14 | 3  | 15.39 | b8y5y12                                                                                                                  | 1583.77 | 88.799  | 4338   | 3 | 528.60  | 11.72  |
| P0A1P0 G3P1_SALTY Glyceraldehyde-3-phohate dehydrogenase | 20 |                                                      | AGIALNDNFVKLVSWYDNETGYS<br>NK        | 296 | 25 | 3  | 17.2  | b4b7b9                                                                                                                   | 2818.37 | 110.170 | 4105   | 3 | 940.13  | 2.25   |
| P0A1P0 G3P1_SALTY Glyceraldehyde-3-phohate dehydrogenase | 21 |                                                      | YDSTHGRFDGTVEVK                      | 46  | 15 | 4  | 20.49 | b10y7y8°y8                                                                                                               | 1710.80 | 47.855  | 2269   | 2 | 855.90  | -3.92  |
| P0A1P0 G3P1_SALTY Glyceraldehyde-3-phohate dehydrogenase | 22 | Oxidation+M(13)                                      | VINDNFGIIEGLMTTVHATTATQK             | 160 | 24 | 3  | 11.05 | b8b10y9                                                                                                                  | 2590.32 | 42.491  | 2868   | 6 | 432.56  | 1.41   |
| P0A1P0 G3P1_SALTY Glyceraldehyde-3-phohate dehydrogenase | 23 | Oxidation+M(4)                                       | LTGMAFR                              | 225 | 7  | 6  | 71.77 | b4b6y3y4y5y6                                                                                                             | 811.41  | 32.886  | 2011   | 2 | 406.21  | -6.62  |
| P0A1P0 G3P1_SALTY Glyceraldehyde-3-phohate dehydrogenase | 24 | Oxidation+M(20)                                      | SDIEIVAINDLLDAEYMAYMLK               | 24  | 22 | 6  | 43.2  | b16b17b18y10y15y16                                                                                                       | 2546.22 | 136.879 | 1547   | 2 | 1273.61 | -7.38  |
| P0A1P0 G3P1_SALTY Glyceraldehyde-3-phohate dehydrogenase | 25 |                                                      | LNDNFVK                              | 300 | 7  | 3  | 16.27 | b3b5*b5                                                                                                                  | 849.44  | 61.867  | 19150  | 1 | 849.44  | -9.63  |
| P0A1P0 G3P1_SALTY Glyceraldehyde-3-phohate dehydrogenase | 26 |                                                      | LDLIAHISK                            | 322 | 9  | 2  | 7.4   | b6°b6                                                                                                                    | 1009.59 | 66.191  | 14206  | 2 | 505.30  | -9.49  |
| P0A1P0 G3P1_SALTY Glyceraldehyde-3-phohate dehydrogenase | 27 |                                                      | VVLTGPSKDNTPMFVK                     | 116 | 16 | 0  | 6.91  |                                                                                                                          | 1715.89 | 58.096  | 2400   | 3 | 572.63  | -5.62  |

|                                               |    |                      |                                 |     |    |    |        |                                                                                      |         |         |        |   |         |        |
|-----------------------------------------------|----|----------------------|---------------------------------|-----|----|----|--------|--------------------------------------------------------------------------------------|---------|---------|--------|---|---------|--------|
| P0A299 RL7_SALTY 50S ribosomal protein L7/L12 | 1  |                      | DQIIEAVSAMSVMDEVVELISAMEEK      | 5   | 25 | 33 | 181.9  | b2°b2*b2b3b4b5*b5b6b7*b7b8°b8b9°b9*b9b10y2°y2y3y4y5°y5y6°y6y7°y7y8y9°y9y10°y10y11y25 | 2737.33 | 137.118 | 77028  | 3 | 913.12  | -0.71  |
| P0A299 RL7_SALTY 50S ribosomal protein L7/L12 | 2  |                      | SITKDKIIEAVSAMSVMDEVVELISAMEEK  | 1   | 29 | 8  | 19.63  | b1b10*b10y3y4y12°y12y29                                                              | 3166.58 | 89.040  | 49936  | 4 | 792.40  | -3.32  |
| P0A299 RL7_SALTY 50S ribosomal protein L7/L12 | 3  |                      | EAKDLVESAPAALKEGVSK             | 82  | 19 | 7  | 21.13  | b7°b7b11b12°b12y7y19                                                                 | 1942.05 | 55.489  | 40664  | 3 | 648.02  | -1.26  |
| P0A299 RL7_SALTY 50S ribosomal protein L7/L12 | 4  |                      | DLVESAPAALK                     | 85  | 11 | 4  | 26.73  | y4y5y8y11                                                                            | 1113.60 | 54.178  | 22208  | 2 | 557.30  | -14.58 |
| P0A299 RL7_SALTY 50S ribosomal protein L7/L12 | 5  |                      | MSITKDKIIEAVSAMSVMDEVVELISAMEEK | 0   | 30 | 6  | 19.33  | b7y3y9y13°y13y15                                                                     | 3297.61 | 99.698  | 13860  | 3 | 1099.87 | -8.29  |
| P0A299 RL7_SALTY 50S ribosomal protein L7/L12 | 6  |                      | EGVSKDDAEALK                    | 96  | 12 | 6  | 28.15  | b2°b2b4b6b11b12                                                                      | 1261.64 | 74.100  | 2671   | 1 | 1261.64 | 6.97   |
| P0A299 RL7_SALTY 50S ribosomal protein L7/L12 | 7  |                      | SLEEAGAEVEVK                    | 109 | 12 | 7  | 71.39  | b3b11y3y5y7y9y10                                                                     | 1260.63 | 46.003  | 6673   | 2 | 630.82  | -1.65  |
| P0A299 RL7_SALTY 50S ribosomal protein L7/L12 | 8  |                      | FGVSAAAAVAVAAGPAEAAEEK          | 30  | 22 | 15 | 79.75  | b3b5b6b7b9°b9b12y3°y3y4°y4y5y10y15y17                                                | 1987.03 | 45.979  | 6583   | 5 | 398.21  | 9.46   |
| P0A299 RL7_SALTY 50S ribosomal protein L7/L12 | 9  |                      | EGVSKDDAEALK                    | 96  | 12 | 4  | 33.96  | b3y6y7y8                                                                             | 1261.64 | 54.312  | 5712   | 2 | 631.32  | 10.45  |
| P0A299 RL7_SALTY 50S ribosomal protein L7/L12 | 10 |                      | FGVSAAAAVAVAAGPAEAAEECT EFDVILK | 30  | 30 | 6  | 28.16  | b3b5b6b8°b8b10                                                                       | 2932.51 | 136.343 | 4586   | 3 | 978.18  | -6.58  |
| P0A299 RL7_SALTY 50S ribosomal protein L7/L12 | 11 |                      | MSITKDKIIEAVSAMSVMDEVVELISAMEEK | 0   | 30 | 3  | 11.06  | b3b21y9                                                                              | 3297.61 | 110.655 | 3862   | 3 | 1099.88 | -6.81  |
| P0A299 RL7_SALTY 50S ribosomal protein L7/L12 | 12 | Phosphoryl STY(5)    | DLVESAPAALK                     | 85  | 11 | 5  | 42.24  | b3b4y7y8y10                                                                          | 1193.57 | 48.795  | 4336   | 2 | 597.29  | -2.86  |
| P0A299 RL7_SALTY 50S ribosomal protein L7/L12 | 13 | Phosphoryl STY(5)    | DLVESAPAALKEGVSK                | 85  | 16 | 3  | 22.09  | b3b4b13                                                                              | 1693.82 | 67.583  | 3582   | 2 | 847.41  | -9.51  |
| P0A299 RL7_SALTY 50S ribosomal protein L7/L12 | 14 | Phosphoryl STY(15)   | DLVESAPAALKEGVSKDDAEALK         | 85  | 23 | 7  | 42.97  | b4b7b8y6y7°y7y8                                                                      | 2436.20 | 136.322 | 1825   | 2 | 1218.60 | 5.81   |
| P0A299 RL7_SALTY 50S ribosomal protein L7/L12 | 15 | Oxidation+M(1)       | MSITKDKIIEAVSAMSVMDEVVELISAMEEK | 0   | 30 | 3  | 21.67  | b7b8y3                                                                               | 3313.64 | 85.010  | 15787  | 4 | 829.17  | 3.39   |
| P65702 PGK_SALTY Phohoglycerate kinase        | 1  | Carbamidomethyl+C(6) | FADVACAGPLLAELDALGK             | 156 | 20 | 20 | 154.25 | b2b3b4b5b7b8y1y2y3y4y5y8y9y10y12y13y14y15y16y20                                      | 2002.04 | 99.720  | 247558 | 2 | 1001.52 | 4.82   |
| P65702 PGK_SALTY Phohoglycerate kinase        | 2  |                      | SVNDVKEDEQILDIGDASAQQLAEILK     | 272 | 27 | 10 | 32.14  | b9b13°b13b14y1y5y6y10y12y27                                                          | 2941.51 | 101.304 | 177656 | 3 | 981.17  | 2.41   |
| P65702 PGK_SALTY Phohoglycerate kinase        | 3  |                      | VATEFSETAPATLK                  | 258 | 14 | 25 | 148.4  | b1b2b3°b3b4°b4b6°b6b7b9y1y2y3y5°y5y6y7y9°y9y10y11°y11y12y13y14                       | 1464.76 | 53.048  | 163755 | 2 | 732.88  | 1.83   |
| P65702 PGK_SALTY Phohoglycerate kinase        | 4  | Carbamidomethyl+C(5) | LLTTCDIPVPTDVR                  | 244 | 14 | 15 | 113.18 | b2b6b7°b7b9y2y3y5y7y8y9y10y11y12y14                                                  | 1599.84 | 69.152  | 121223 | 2 | 800.43  | 2.06   |
| P65702 PGK_SALTY Phohoglycerate kinase        | 5  |                      | TILWNGPVGVFEPNFR                | 302 | 17 | 18 | 115.28 | b2y1y4y5y6°y6y7°y7y8°y8y10y11y12y13°y13°y13y14y17                                    | 1993.04 | 107.046 | 113327 | 2 | 997.02  | 4.29   |
| P65702 PGK_SALTY Phohoglycerate kinase        | 6  |                      | MTDLDLAGKR                      | 5   | 10 | 8  | 70.65  | b2y3y4y5y6y7y9y10                                                                    | 1119.58 | 43.500  | 83170  | 2 | 560.29  | -5.56  |
| P65702 PGK_SALTY Phohoglycerate kinase        | 7  |                      | LTVLDSLSK                       | 197 | 9  | 10 | 47.52  | b2°b2y2y4y5y6°y6y7°y7y9                                                              | 975.56  | 62.595  | 70840  | 2 | 488.29  | -8.70  |
| P65702 PGK_SALTY Phohoglycerate kinase        | 8  |                      | KDDEALSK                        | 119 | 8  | 5  | 14.84  | b2b3b7°y6y8                                                                          | 905.46  | 31.515  | 67321  | 2 | 453.23  | 1.82   |
| P65702 PGK_SALTY Phohoglycerate kinase        | 9  |                      | VLPAVAMLEER                     | 373 | 11 | 6  | 40.99  | y5y7°y7y8°y8y9                                                                       | 1227.67 | 81.085  | 61592  | 2 | 614.34  | -2.09  |
| P65702 PGK_SALTY Phohoglycerate kinase        | 10 |                      | ADLNVPVKEGK                     | 19  | 11 | 14 | 66.96  | b2°b2b5°b5b9b10°b10y1y2y4y6y8y9y11                                                   | 1169.65 | 37.265  | 56330  | 2 | 585.33  | -4.80  |
| P65702 PGK_SALTY Phohoglycerate kinase        | 11 |                      | LVKDYLDGVDVAEGELVVLENV R        | 90  | 23 | 5  | 22.67  | b14b15y2y3y6                                                                         | 2544.36 | 98.259  | 56027  | 3 | 848.79  | 0.29   |

|                                                                        |    |                      |                              |     |    |    |        |                                                           |         |         |        |   |         |        |
|------------------------------------------------------------------------|----|----------------------|------------------------------|-----|----|----|--------|-----------------------------------------------------------|---------|---------|--------|---|---------|--------|
| P65702 PGK_SALTY Phohoglycerate kinase                                 | 12 |                      | MTDLDLAGK                    | 5   | 9  | 7  | 25.47  | b2b6y2y3y8°y8y9                                           | 963.48  | 48.872  | 35036  | 2 | 482.24  | -4.43  |
| P65702 PGK_SALTY Phohoglycerate kinase                                 | 13 |                      | AQASTHGIGK                   | 146 | 10 | 11 | 63.66  | b2*b2b3*b3y2y4y5y6y7y8y10                                 | 969.50  | 16.372  | 18310  | 2 | 485.26  | -8.18  |
| P65702 PGK_SALTY Phohoglycerate kinase                                 | 14 |                      | ASLPTIELALK                  | 38  | 11 | 4  | 28.77  | b5b7y4y8                                                  | 1155.69 | 77.924  | 71407  | 2 | 578.35  | -6.34  |
| P65702 PGK_SALTY Phohoglycerate kinase                                 | 15 | Carbamidomethyl+C(5) | YAALCDVFMDFAGTAHR            | 128 | 18 | 6  | 24.05  | b9b13y7°y7y9y11                                           | 2043.98 | 92.110  | 13659  | 3 | 682.00  | 16.54  |
| P65702 PGK_SALTY Phohoglycerate kinase                                 | 16 |                      | ISYISTGGGAFLEFVEGK           | 355 | 18 | 5  | 35.81  | b8b9b10y8y11                                              | 1874.99 | 62.505  | 8242   | 2 | 938.00  | 17.25  |
| P65702 PGK_SALTY Phohoglycerate kinase                                 | 17 |                      | LSNPVR                       | 84  | 6  | 4  | 34.38  | y3y4*y4y5                                                 | 685.39  | 28.369  | 7727   | 2 | 343.20  | -11.75 |
| P65702 PGK_SALTY Phohoglycerate kinase                                 | 18 |                      | VTSDAR                       | 30  | 6  | 1  | 11.88  | y4                                                        | 648.33  | 65.392  | 3271   | 1 | 648.33  | -1.22  |
| P65702 PGK_SALTY Phohoglycerate kinase                                 | 19 |                      | VMVTSHLGRPTEGEYNEEFSLPVVNYLK | 53  | 29 | 7  | 40.67  | b4b5b6°b6b9b13b16                                         | 3321.67 | 136.297 | 2242   | 3 | 1107.89 | -4.41  |
| P65702 PGK_SALTY Phohoglycerate kinase                                 | 20 |                      | SLYEADLVDEAK                 | 231 | 12 | 10 | 85.95  | b4b5°b5b7b8°b8b9b10b11y4                                  | 1352.66 | 46.765  | 2152   | 3 | 451.56  | 4.87   |
| P65702 PGK_SALTY Phohoglycerate kinase                                 | 21 |                      | IADQLIVGGGIANTFVAAQGHSVGK    | 206 | 25 | 3  | 10.97  | b3y9y19                                                   | 2423.25 | 111.368 | 1657   | 3 | 808.42  | -21.76 |
| P65702 PGK_SALTY Phohoglycerate kinase                                 | 22 |                      | VTSDARIR                     | 30  | 8  | 3  | 27.86  | b4y5y6                                                    | 917.51  | 48.865  | 69514  | 2 | 459.26  | -6.85  |
| P65702 PGK_SALTY Phohoglycerate kinase                                 | 23 |                      | VATEFSETAPATLKSVNDVK         | 258 | 20 | 3  | 21.24  | b5b9b10                                                   | 2107.09 | 75.324  | 40619  | 3 | 703.03  | -1.04  |
| P65702 PGK_SALTY Phohoglycerate kinase                                 | 24 |                      | ISYISTGGGAFLEFVEGKVLPVAMLEER | 355 | 29 | 4  | 21.4   | b11y6°y6y7                                                | 3083.64 | 136.435 | 3098   | 4 | 771.66  | 8.23   |
| P65702 PGK_SALTY Phohoglycerate kinase                                 | 25 | Oxidation+M(7)       | VLPVAMLEER                   | 373 | 11 | 4  | 28.77  | b3b5y3y9                                                  | 1243.66 | 80.904  | 11388  | 2 | 622.34  | -5.59  |
| P65702 PGK_SALTY Phohoglycerate kinase                                 | 26 |                      | TDLDLAGK                     | 6   | 8  | 6  | 33.25  | b3°b3b4°b4b5°b5                                           | 832.45  | 48.831  | 42674  | 2 | 416.73  | 13.93  |
| P65702 PGK_SALTY Phohoglycerate kinase                                 | 27 |                      | TDLDLAGKR                    | 6   | 9  | 0  | 3.14   |                                                           | 988.54  | 43.461  | 17173  | 2 | 494.77  | -6.42  |
| P65702 PGK_SALTY Phohoglycerate kinase                                 | 28 |                      | LNVPVKEGK                    | 21  | 9  | 3  | 19.28  | b3*b3b4                                                   | 983.58  | 37.234  | 13969  | 2 | 492.29  | -11.67 |
| P65702 PGK_SALTY Phohoglycerate kinase                                 | 29 |                      | DLNVPVKEGK                   | 20  | 10 | 5  | 44     | b3b4b5°b5b6                                               | 1098.60 | 37.248  | 8530   | 2 | 549.80  | -11.78 |
| P0A283 PTGA_SALTY Glucose-ecific phohotransferase enzyme IIA component | 1  |                      | STLTPVVISNMDEIKELIK          | 133 | 19 | 18 | 96.65  | b2°b2b3°b3b4b14b16y1y3y4y11y12y13°y13y15y16y17y19         | 2130.16 | 93.577  | 254100 | 3 | 710.72  | -5.96  |
| P0A283 PTGA_SALTY Glucose-ecific phohotransferase enzyme IIA component | 2  |                      | VGDPVIEFDLPLEEK              | 115 | 16 | 16 | 99.67  | b4b5b6b7°b7b10y2°y2y6y9°y9y10y11y12y13y16                 | 1812.97 | 100.239 | 148048 | 2 | 906.99  | 1.21   |
| P0A283 PTGA_SALTY Glucose-ecific phohotransferase enzyme IIA component | 3  |                      | MVAPVDGTIGK                  | 59  | 11 | 23 | 138.78 | b1b2b3b5b6b8°b8b9b10°b10b11°b11y1y2y3y6y7y8°y8y9°y9y10y11 | 1087.57 | 46.728  | 143415 | 2 | 544.29  | -12.12 |
| P0A283 PTGA_SALTY Glucose-ecific phohotransferase enzyme IIA component | 4  |                      | STLTPVVISNMDEIK              | 133 | 15 | 4  | 14.47  | b3°b3y5y11                                                | 1646.87 | 67.897  | 2432   | 2 | 823.94  | 0.37   |
| P0A283 PTGA_SALTY Glucose-ecific phohotransferase enzyme IIA component | 5  |                      | LSGSVTVGETPVIR               | 152 | 14 | 3  | 20.83  | b4b5y7                                                    | 1414.79 | 55.809  | 39296  | 2 | 707.90  | -1.90  |
| P0A283 PTGA_SALTY Glucose-ecific phohotransferase enzyme IIA component | 6  |                      | VKVGDPVIEFDLPLEEK            | 113 | 18 | 9  | 51.73  | b5b7b9b11°b11y3y6y8y10                                    | 2040.11 | 96.459  | 128149 | 3 | 680.71  | -6.64  |
| P0A283 PTGA_SALTY Glucose-ecific phohotransferase enzyme IIA component | 7  | Phosphoryl STY(8)    | MVAPVDGTIGK                  | 59  | 11 | 7  | 39.23  | b3b6°b6y4°y4y5y10                                         | 1167.53 | 47.847  | 2197   | 2 | 584.27  | -4.81  |



|                                                                         |    |                    |                               |     |    |    |        |                                                          |         |         |       |   |         |        |
|-------------------------------------------------------------------------|----|--------------------|-------------------------------|-----|----|----|--------|----------------------------------------------------------|---------|---------|-------|---|---------|--------|
| [P0A283]PTGA_SALTY Glucose-ecific phohotransferase enzyme IIA component | 8  | Oxidation+M(11)    | STLTPVVISNMDEIK               | 133 | 15 | 3  | 20.49  | b5y5y6                                                   | 1662.89 | 59.787  | 6053  | 2 | 831.95  | 14.98  |
| [P0A283]PTGA_SALTY Glucose-ecific phohotransferase enzyme IIA component | 9  |                    | SNMDEIK                       | 141 | 7  | 0  | 6.28   |                                                          | 836.38  | 67.871  | 1901  | 1 | 836.38  | 3.21   |
| [P0A1E3]CYSK_SALTY Cysteine synthase A                                  | 1  |                    | IQGIGAGFIPGNLDLK              | 226 | 16 | 15 | 72.69  | b2*b2b3b8b9b14y1y2y3y7°y7y10y12y14y16                    | 1612.91 | 84.142  | 99750 | 2 | 806.96  | 1.14   |
| [P0A1E3]CYSK_SALTY Cysteine synthase A                                  | 2  |                    | YLSTALFADLFTEKELQQ            | 305 | 18 | 10 | 33.08  | b2b8b12°b12b16y7*y7y11y12y18                             | 2117.09 | 103.131 | 96722 | 2 | 1059.05 | 5.30   |
| [P0A1E3]CYSK_SALTY Cysteine synthase A                                  | 3  |                    | YLLLQQFSNPANPEIHEK            | 137 | 18 | 21 | 120.21 | b2b3b12°b12b13*b13y2y3°y3y4y6y7y8y9°y9*y9y11y12y13y15y18 | 2141.09 | 74.859  | 81407 | 3 | 714.37  | -7.18  |
| [P0A1E3]CYSK_SALTY Cysteine synthase A                                  | 4  |                    | NIVVILPSSGER                  | 293 | 12 | 10 | 79.63  | b2b4b6y3y6y7y8y9y10y12                                   | 1283.73 | 64.633  | 59320 | 2 | 642.37  | -4.47  |
| [P0A1E3]CYSK_SALTY Cysteine synthase A                                  | 5  |                    | AEEIVASDPQK                   | 126 | 11 | 17 | 108.04 | b1b3b5°b5b7b10y1y2y3y5°y5*y5y6y7°y7y8y11                 | 1186.59 | 32.004  | 48796 | 2 | 593.80  | -4.22  |
| [P0A1E3]CYSK_SALTY Cysteine synthase A                                  | 6  |                    | GVLKPGVELVEPTSGNTGIALAYVAAAR  | 56  | 28 | 6  | 45.36  | y1y4y5y6y7y17                                            | 2753.52 | 82.309  | 38703 | 3 | 918.51  | -1.15  |
| [P0A1E3]CYSK_SALTY Cysteine synthase A                                  | 7  |                    | LQEDESFTNK                    | 283 | 10 | 5  | 23.88  | b3y7y8°y8y10                                             | 1210.57 | 35.725  | 33320 | 2 | 605.79  | 5.45   |
| [P0A1E3]CYSK_SALTY Cysteine synthase A                                  | 8  |                    | NPSFSVK                       | 35  | 7  | 10 | 46.26  | b1b2b5b6y2y5y6°y6y7*y7                                   | 778.40  | 38.079  | 30208 | 2 | 389.70  | -12.94 |
| [P0A1E3]CYSK_SALTY Cysteine synthase A                                  | 9  |                    | YLSTALFADLFTEK                | 305 | 14 | 6  | 31.99  | b2b5b7b13y8y12                                           | 1618.84 | 104.098 | 12823 | 2 | 809.92  | 0.23   |
| [P0A1E3]CYSK_SALTY Cysteine synthase A                                  | 10 |                    | LTLTMPETMSIER                 | 87  | 13 | 3  | 25.77  | y4y8y11                                                  | 1521.76 | 74.662  | 70361 | 2 | 761.39  | -1.04  |
| [P0A1E3]CYSK_SALTY Cysteine synthase A                                  | 11 |                    | IGANMIWDAEK                   | 44  | 11 | 5  | 47.47  | b7y5y6y8y10                                              | 1247.61 | 66.222  | 8914  | 2 | 624.31  | 3.72   |
| [P0A1E3]CYSK_SALTY Cysteine synthase A                                  | 12 |                    | LIDK                          | 242 | 4  | 1  | 10.62  | b3                                                       | 488.31  | 64.000  | 3941  | 1 | 488.31  | 7.44   |
| [P0A1E3]CYSK_SALTY Cysteine synthase A                                  | 13 |                    | LIDKVVGITNEEAISTAR            | 242 | 18 | 3  | 12.58  | b5y5y12                                                  | 1929.04 | 60.684  | 42394 | 3 | 643.69  | -11.64 |
| [P0A1E3]CYSK_SALTY Cysteine synthase A                                  | 14 |                    | GYKLTLTMPETMSIER              | 84  | 16 | 5  | 22.92  | b13y5°y5y10y11                                           | 1869.92 | 78.083  | 36450 | 2 | 935.47  | -10.64 |
| [P0A1E3]CYSK_SALTY Cysteine synthase A                                  | 15 |                    | AEEIVASDPQKYLLLQQFSNPANPEIHEK | 126 | 29 | 8  | 20.78  | b3b14y3y6y10y13°y13*y13                                  | 3308.67 | 77.819  | 35288 | 4 | 827.92  | -3.84  |
| [P0A1E3]CYSK_SALTY Cysteine synthase A                                  | 16 |                    | SKIYEDNSLTIGHTPLVR            | 1   | 18 | 3  | 21.5   | b6b7b11                                                  | 2043.07 | 59.793  | 21141 | 3 | 681.70  | -8.01  |
| [P0A1E3]CYSK_SALTY Cysteine synthase A                                  | 17 |                    | MSKIYEDNSLTIGHTPLVR           | 0   | 19 | 4  | 18.91  | b4b10b13y13                                              | 2174.15 | 90.074  | 12200 | 2 | 1087.58 | 11.57  |
| [P0A1E3]CYSK_SALTY Cysteine synthase A                                  | 18 |                    | LTLTMPETMSIERR                | 87  | 14 | 7  | 37.59  | b5°b5b8b9°b9b10y3                                        | 1677.87 | 49.625  | 2097  | 2 | 839.44  | -0.58  |
| [P0A1E3]CYSK_SALTY Cysteine synthase A                                  | 19 | Phosphoryl STY(12) | IYEDNSLTIGHTPLVR              | 3   | 16 | 6  | 22.09  | b4b10*b10b11°b11*b11                                     | 1907.92 | 74.920  | 68704 | 3 | 636.65  | 2.43   |
| [P0A1E3]CYSK_SALTY Cysteine synthase A                                  | 20 | Phosphoryl STY(11) | VVGITNEEAISTARR               | 246 | 15 | 3  | 14.47  | b10y6y9_H3PO4 y9                                         | 1695.84 | 54.278  | 3260  | 2 | 848.42  | 2.16   |
| [P0A1E3]CYSK_SALTY Cysteine synthase A                                  | 21 | Oxidation+M(5)     | IGANMIWDAEKR                  | 44  | 12 | 4  | 28.15  | b4b7b9°b9                                                | 1419.70 | 57.669  | 2856  | 2 | 710.35  | -4.99  |
| [P0A1E3]CYSK_SALTY Cysteine synthase A                                  | 22 | Oxidation+M(5)     | LTLTMPETMSIER                 | 87  | 13 | 3  | 16.52  | b9y5y8                                                   | 1537.76 | 71.320  | 2429  | 3 | 513.26  | -0.24  |
| [P0A1E3]CYSK_SALTY Cysteine synthase A                                  | 23 |                    | QFSNPANPEIHEK                 | 142 | 13 | 6  | 45.85  | b3b4b5b6°b6b8                                            | 1510.71 | 74.903  | 6658  | 3 | 504.24  | -11.39 |
| [P0A1E3]CYSK_SALTY Cysteine synthase A                                  | 24 |                    | NPSFSVK                       | 35  | 7  | 0  | 1.26   |                                                          | 761.38  | 38.086  | 3927  | 2 | 381.19  | -0.08  |

|                                             |    |                       |                                   |     |    |    |       |                                        |         |         |       |   |         |        |
|---------------------------------------------|----|-----------------------|-----------------------------------|-----|----|----|-------|----------------------------------------|---------|---------|-------|---|---------|--------|
| P0A1E3 CYSK_SALTY Cysteine synthase A       | 25 |                       | AEEIVASDPQK                       | 126 | 11 | 0  | 3.77  |                                        | 1169.57 | 31.988  | 1807  | 3 | 390.53  | 5.32   |
| P0A297 RL10_SALTY 50S ribosomal protein L10 | 1  |                       | LATLPTYEEAIAR                     | 125 | 13 | 14 | 81.81 | b2b3°b3b4°b4y6y7°y7y8°y8y9y10y11y13    | 1447.78 | 65.716  | 84655 | 2 | 724.39  | -2.45  |
| P0A297 RL10_SALTY 50S ribosomal protein L10 | 2  | Carbamidomethyl+C(9)  | VVEGTQFECLKDFTVGPTLIAYSM EHPGAAAR | 62  | 32 | 10 | 25.1  | b1b2b3b8y4y6y13y15y16y32               | 3494.70 | 92.953  | 67756 | 4 | 874.43  | -1.47  |
| P0A297 RL10_SALTY 50S ribosomal protein L10 | 3  |                       | AAAFEGELIPASQIDR                  | 109 | 16 | 7  | 37.44 | b1y2y7y8y11y12y16                      | 1687.87 | 69.324  | 62217 | 2 | 844.44  | 5.35   |
| P0A297 RL10_SALTY 50S ribosomal protein L10 | 4  |                       | EAGVYMR                           | 46  | 7  | 7  | 43.25 | b1b4b7y3y5y6y7                         | 825.40  | 31.995  | 10824 | 2 | 413.20  | 4.44   |
| P0A297 RL10_SALTY 50S ribosomal protein L10 | 5  |                       | DTFVGPTLIAYSM EHPGAAAR            | 73  | 21 | 10 | 61.4  | b4b5b8b10b12y5y8y9y10y12               | 2204.10 | 83.323  | 9564  | 3 | 735.37  | 7.20   |
| P0A297 RL10_SALTY 50S ribosomal protein L10 | 6  |                       | LMATMKEASAGK                      | 138 | 12 | 5  | 27.94 | b9y8°y8y10y11                          | 1237.63 | 61.997  | 8527  | 2 | 619.32  | 3.65   |
| P0A297 RL10_SALTY 50S ribosomal protein L10 | 7  | Carbamidomethyl+C(9)  | VVEGTQFECLK                       | 62  | 11 | 7  | 30.2  | b1b3b4b10°b10y4y11                     | 1309.66 | 86.871  | 6269  | 2 | 655.34  | 13.70  |
| P0A297 RL10_SALTY 50S ribosomal protein L10 | 8  |                       | GALSAVVADSR                       | 20  | 11 | 7  | 59.51 | b5b6y4y5y6y7y11                        | 1045.58 | 30.176  | 5823  | 2 | 523.29  | 12.61  |
| P0A297 RL10_SALTY 50S ribosomal protein L10 | 9  |                       | MTELR                             | 37  | 5  | 3  | 22.5  | b4°b4y3                                | 649.33  | 41.616  | 24177 | 1 | 649.33  | -7.99  |
| P0A297 RL10_SALTY 50S ribosomal protein L10 | 10 |                       | LMATMK                            | 138 | 6  | 4  | 34.38 | b4b5y5°y5                              | 694.37  | 41.548  | 12171 | 1 | 694.37  | 14.94  |
| P0A297 RL10_SALTY 50S ribosomal protein L10 | 11 |                       | QAIVAEVSEVAK                      | 8   | 12 | 4  | 17.94 | b3°b3y3y6                              | 1243.71 | 41.606  | 10245 | 2 | 622.36  | 16.98  |
| P0A297 RL10_SALTY 50S ribosomal protein L10 | 12 |                       | EASAGK                            | 144 | 6  | 1  | 11.88 | b3                                     | 562.29  | 44.255  | 2979  | 1 | 562.29  | 6.84   |
| P0A297 RL10_SALTY 50S ribosomal protein L10 | 13 |                       | AAAFEGELIPASQIDRLATLPTYEE AIAR    | 109 | 29 | 6  | 29.28 | b9b10b13y6y9y10                        | 3116.64 | 93.577  | 13156 | 3 | 1039.55 | 4.31   |
| P0A297 RL10_SALTY 50S ribosomal protein L10 | 14 |                       | LMATMKEASAGK                      | 138 | 12 | 12 | 76.62 | b4b6°b6b10y6y8°y8y9y10°y10y11°y11      | 1237.63 | 59.761  | 6341  | 2 | 619.32  | -1.97  |
| P0A297 RL10_SALTY 50S ribosomal protein L10 | 15 | Carbamidomethyl+C(9)  | VVEGTQFECLKDFTVGPTLIAYSM EHPGAAAR | 62  | 32 | 3  | 22.24 | b10y12y13                              | 3494.69 | 64.310  | 3570  | 3 | 1165.57 | -5.59  |
| P0A297 RL10_SALTY 50S ribosomal protein L10 | 16 | Carbamidomethyl+C(10) | RVVEGTQFECLK                      | 61  | 12 | 4  | 29.86 | b9b10y5y11                             | 1465.75 | 71.243  | 2279  | 2 | 733.38  | -0.92  |
| P0A297 RL10_SALTY 50S ribosomal protein L10 | 17 |                       | AGREAGVYMR                        | 43  | 10 | 3  | 23.88 | b8y6y7                                 | 1109.55 | 37.149  | 1914  | 2 | 555.28  | 0.00   |
| P0A297 RL10_SALTY 50S ribosomal protein L10 | 18 | Phosphoryl STY(12)    | AAAFEGELIPASQIDR                  | 109 | 16 | 6  | 22.92 | b5b10b11°b11y4°y4                      | 1767.82 | 46.736  | 1777  | 2 | 884.41  | -3.38  |
| P0A297 RL10_SALTY 50S ribosomal protein L10 | 19 | Oxidation+M(9)        | AGREAGVYMR                        | 43  | 10 | 6  | 43.83 | b5b8b9y3y8°y8                          | 1125.55 | 42.452  | 8518  | 2 | 563.28  | 2.28   |
| P0A297 RL10_SALTY 50S ribosomal protein L10 | 20 | Oxidation+M(5)        | LMATMKEASAGK                      | 138 | 12 | 4  | 38.61 | b4b7b9b10                              | 1253.63 | 42.424  | 5724  | 2 | 627.32  | 2.43   |
| P52616 FLJB_SALTY Phase 2 flagellin         | 1  |                       | AQILQQAGTSVLAQANQVPQNVLSLLR       | 479 | 27 | 13 | 28.47 | b2°b2b3°b3b4b7°b7b9b11y2y4y9y27        | 2860.60 | 105.872 | 87537 | 3 | 954.20  | -0.34  |
| P52616 FLJB_SALTY Phase 2 flagellin         | 2  |                       | SQSALGTAIER                       | 20  | 11 | 9  | 47.47 | b2b8y1y6y7y8y9°y9y11                   | 1132.59 | 42.564  | 68904 | 2 | 566.80  | -2.91  |
| P52616 FLJB_SALTY Phase 2 flagellin         | 3  |                       | AQVINTNSLSLLTQNNLNK               | 1   | 19 | 12 | 43.06 | b2°b2b4b8y2y5y7y8y9y15°y15y19          | 2085.13 | 75.335  | 42970 | 2 | 1043.07 | -1.41  |
| P52616 FLJB_SALTY Phase 2 flagellin         | 4  |                       | TIEGGYALK                         | 328 | 9  | 4  | 25.47 | b3b8y7y9                               | 951.51  | 44.189  | 36563 | 2 | 476.26  | -9.88  |
| P52616 FLJB_SALTY Phase 2 flagellin         | 5  |                       | SDLGAVQNR                         | 434 | 9  | 12 | 64    | b1b2b5°b5y2y3y5y6y7y8y9°y9             | 959.48  | 28.303  | 27853 | 2 | 480.24  | -10.18 |
| P52616 FLJB_SALTY Phase 2 flagellin         | 6  |                       | TTSYTAADGTTK                      | 357 | 12 | 6  | 45.88 | b8b10b11y3y5y6                         | 1216.58 | 31.371  | 16648 | 3 | 406.20  | 5.52   |
| P52616 FLJB_SALTY Phase 2 flagellin         | 7  |                       | TAANQLGGVDGK                      | 369 | 12 | 15 | 66.62 | b2°b2b4b5b7°b7b9°b9b10°b10y2y6°y6y8y12 | 1130.57 | 60.608  | 15733 | 2 | 565.79  | -5.07  |

|                                                        |    |                   |                                 |     |    |    |        |                                                                      |         |         |       |   |         |        |
|--------------------------------------------------------|----|-------------------|---------------------------------|-----|----|----|--------|----------------------------------------------------------------------|---------|---------|-------|---|---------|--------|
| P52616 FLJB_SALTY Phase 2 flagellin                    | 8  |                   | INSAKDDAAGQAIANR                | 37  | 16 | 24 | 150.11 | b2b4°b4b5°b5b6b9°b9b11<br>b12y1y3°y3y4y5y6y7°y7y<br>8y9y10°y10y11y16 | 1614.80 | 30.755  | 13485 | 3 | 538.94  | -14.82 |
| P52616 FLJB_SALTY Phase 2 flagellin                    | 9  |                   | AAGHDFK                         | 396 | 7  | 4  | 32     | b3y1y4y5                                                             | 745.35  | 112.123 | 3602  | 1 | 745.35  | -13.92 |
| P52616 FLJB_SALTY Phase 2 flagellin                    | 10 |                   | ELAVQSANSTNSQSDLDLSIQAEIT<br>QR | 93  | 26 | 5  | 19.63  | b8b9b13°b13y13                                                       | 2805.36 | 71.046  | 3240  | 2 | 1403.18 | 2.35   |
| P52616 FLJB_SALTY Phase 2 flagellin                    | 11 |                   | DTPAVVSADAK                     | 288 | 11 | 3  | 19.74  | b7y3y7                                                               | 1073.56 | 83.476  | 2849  | 1 | 1073.56 | 9.67   |
| P52616 FLJB_SALTY Phase 2 flagellin                    | 12 |                   | NANDGISIAQTTEGALNEINNQL<br>R    | 66  | 25 | 4  | 12.9   | b13b16y6y9                                                           | 2670.32 | 125.761 | 80234 | 3 | 890.78  | 4.21   |
| P52616 FLJB_SALTY Phase 2 flagellin                    | 13 |                   | YFVTIGGFTGADAAK                 | 234 | 15 | 6  | 23.8   | b3y5y6°y6y8°y8                                                       | 1517.76 | 74.168  | 41426 | 2 | 759.38  | -2.09  |
| P52616 FLJB_SALTY Phase 2 flagellin                    | 14 |                   | FNSAITNLGNTVNNLSEAR             | 443 | 19 | 4  | 12.16  | b4y4°y4y7                                                            | 2034.98 | 80.074  | 13635 | 3 | 679.00  | -18.12 |
| P52616 FLJB_SALTY Phase 2 flagellin                    | 15 |                   | IDAALAQVDALR                    | 422 | 12 | 5  | 27.94  | b3b4b9y6°y6                                                          | 1255.70 | 68.553  | 4425  | 3 | 419.24  | -3.99  |
| P52616 FLJB_SALTY Phase 2 flagellin                    | 16 |                   | QINSQTLGLDSLNVQK                | 161 | 16 | 8  | 27.39  | b3°b3b7b11°b11°b11y4y9                                               | 1757.95 | 45.987  | 3133  | 3 | 586.66  | 7.22   |
| P52616 FLJB_SALTY Phase 2 flagellin                    | 17 |                   | VLAQDNTLTIQVGANDGETIDIDL<br>K   | 136 | 25 | 3  | 10.97  | b6y9y13                                                              | 2656.41 | 115.677 | 1826  | 2 | 1328.71 | 16.27  |
| P52616 FLJB_SALTY Phase 2 flagellin                    | 18 |                   | DDAAGQAIANR                     | 42  | 11 | 5  | 22.75  | b9°b9°b9b10y10                                                       | 1101.55 | 65.180  | 1609  | 2 | 551.28  | 19.28  |
| P52616 FLJB_SALTY Phase 2 flagellin                    | 19 |                   | DTAVTTKAYANNGTTLDVSGLD<br>DAAIK | 182 | 27 | 6  | 22.01  | b7°b7y6y11y12y24                                                     | 2725.39 | 74.836  | 19006 | 3 | 909.14  | 14.51  |
| P52616 FLJB_SALTY Phase 2 flagellin                    | 20 |                   | FDADNNKYFVTIGGFTGADAAK          | 227 | 22 | 3  | 11.33  | b13y6y12                                                             | 2322.12 | 79.482  | 6694  | 3 | 774.71  | 5.78   |
| P52616 FLJB_SALTY Phase 2 flagellin                    | 21 |                   | AKTTSYTAADGTTK                  | 355 | 14 | 5  | 24.88  | b6b7b9°b9y8                                                          | 1415.72 | 48.821  | 5251  | 2 | 708.36  | 13.88  |
| P52616 FLJB_SALTY Phase 2 flagellin                    | 22 |                   | AATGGTNGTASVTTGGAVKFDAD<br>NNK  | 209 | 25 | 6  | 12.9   | b7b12°b12y5°y5y19                                                    | 2324.14 | 88.273  | 2957  | 3 | 775.39  | 13.45  |
| P52616 FLJB_SALTY Phase 2 flagellin                    | 23 |                   | QINSQTLGLDSLNVQKAYDVK           | 161 | 21 | 5  | 14.63  | b3b6°b6y5y13                                                         | 2334.24 | 68.945  | 2554  | 2 | 1167.62 | 4.50   |
| P52616 FLJB_SALTY Phase 2 flagellin                    | 24 |                   | TYNASKAAGHDFK                   | 390 | 13 | 9  | 73.27  | b7°b7b8b9b10y4y7y8y10                                                | 1409.67 | 32.928  | 2433  | 3 | 470.56  | -5.98  |
| P52616 FLJB_SALTY Phase 2 flagellin                    | 25 |                   | AAGHDFKAQPELAEAAAK              | 396 | 18 | 3  | 21.5   | b8b9b14                                                              | 1824.94 | 89.152  | 2294  | 3 | 608.98  | 6.09   |
| P52616 FLJB_SALTY Phase 2 flagellin                    | 26 | Phosphoryl STY(5) | DTAVTTK                         | 182 | 7  | 4  | 35.01  | b3y4°y4y6                                                            | 815.35  | 42.432  | 1837  | 2 | 408.18  | 11.90  |
| P52616 FLJB_SALTY Phase 2 flagellin                    | 27 |                   | SQSALGT                         | 20  | 7  | 0  | 3.77   |                                                                      | 663.33  | 42.513  | 9821  | 1 | 663.33  | 5.43   |
| P66193 RL31B_SALTY 50S ribosomal<br>protein L31 type B | 1  |                   | MKPDIHVPYR                      | 0   | 10 | 6  | 22.12  | b3y2y4y7°y7y10                                                       | 1255.65 | 41.588  | 70003 | 3 | 419.22  | -7.29  |
| P66193 RL31B_SALTY 50S ribosomal<br>protein L31 type B | 2  |                   | TFDSESSAAR                      | 62  | 10 | 17 | 74.91  | b1°b1b2°b2b4°b4y1y2y3y5<br>y6y7°y7y8°y8y9y10                         | 1070.47 | 25.528  | 38012 | 2 | 535.74  | -6.27  |
| P66193 RL31B_SALTY 50S ribosomal<br>protein L31 type B | 3  |                   | TVVFHDTSANEYVK                  | 10  | 14 | 3  | 20.83  | b8y10y11                                                             | 1609.77 | 56.240  | 1524  | 2 | 805.39  | -12.51 |
| P66193 RL31B_SALTY 50S ribosomal<br>protein L31 type B | 4  |                   | FGHFIGAK                        | 76  | 8  | 5  | 58.14  | b3b6b7y3y7                                                           | 876.46  | 45.997  | 13940 | 2 | 438.73  | -19.15 |
| P66193 RL31B_SALTY 50S ribosomal<br>protein L31 type B | 5  |                   | SHPFYTGRR                       | 52  | 8  | 6  | 42.12  | b4°b4b6°b6b7y7                                                       | 964.47  | 90.595  | 3023  | 1 | 964.47  | 2.03   |
| P66193 RL31B_SALTY 50S ribosomal<br>protein L31 type B | 6  |                   | VGSTIKTER                       | 24  | 9  | 4  | 33.25  | y3°y3y4y5                                                            | 990.55  | 18.326  | 4904  | 2 | 495.78  | -12.75 |
| P66193 RL31B_SALTY 50S ribosomal<br>protein L31 type B | 7  |                   | QKTFDSESSAAR                    | 60  | 12 | 3  | 21.92  | b6y7y8                                                               | 1326.62 | 35.238  | 2786  | 2 | 663.81  | -6.81  |
| P66193 RL31B_SALTY 50S ribosomal<br>protein L31 type B | 8  |                   | SHPFYTGRRQK                     | 52  | 10 | 7  | 48.14  | b3b4b8°b8b9°b9°b9                                                    | 1220.62 | 42.425  | 2214  | 3 | 407.55  | 3.80   |

|                                 |    |                    |                                 |     |    |    |        |                                                                             |         |         |        |   |         |        |
|---------------------------------|----|--------------------|---------------------------------|-----|----|----|--------|-----------------------------------------------------------------------------|---------|---------|--------|---|---------|--------|
| P06179 FLIC_SALTY Flagellin     | 1  |                    | AQILQQAGTSVLAQANQPQNVLSLLR      | 468 | 27 | 13 | 28.47  | b2*b2b3*b3b4b7*b7b9b11y2y4y9y27                                             | 2860.60 | 105.872 | 87537  | 3 | 954.20  | -0.34  |
| P06179 FLIC_SALTY Flagellin     | 2  |                    | SQSALGTAIER                     | 20  | 11 | 9  | 47.47  | b2b8y1y6y7y8y9°y9y11                                                        | 1132.59 | 42.564  | 68904  | 2 | 566.80  | -2.91  |
| P06179 FLIC_SALTY Flagellin     | 3  |                    | AQVINTNSLSLLTQNNLNK             | 1   | 19 | 12 | 43.06  | b2*b2b4b8y2y5y7y8y9y15°y15y19                                               | 2085.13 | 75.335  | 42970  | 2 | 1043.07 | -1.41  |
| P06179 FLIC_SALTY Flagellin     | 4  |                    | FNSAITNLGNTVNNLTSAR             | 432 | 19 | 9  | 41.16  | b4b5°b5b11y2y3y6y11y14                                                      | 2007.04 | 79.195  | 31242  | 2 | 1004.02 | 7.97   |
| P06179 FLIC_SALTY Flagellin     | 5  |                    | SDLGAVQNR                       | 423 | 9  | 12 | 64     | b1b2b5°b5y2y3y5y6y7y8y9°y9                                                  | 959.48  | 28.303  | 27853  | 2 | 480.24  | -10.18 |
| P06179 FLIC_SALTY Flagellin     | 6  |                    | IDAALAQVDTLR                    | 411 | 12 | 5  | 27.94  | b11y3y6y7*y7                                                                | 1285.71 | 61.714  | 24616  | 2 | 643.36  | -4.37  |
| P06179 FLIC_SALTY Flagellin     | 7  |                    | INSAKDDAAGQAIANR                | 37  | 16 | 24 | 150.11 | b2b4°b4b5°b5b6b9*b9b11b12y1y3*y3y4y5y6y7*y7y8y9y10*y10y11y16                | 1614.80 | 30.755  | 13485  | 3 | 538.94  | -14.82 |
| P06179 FLIC_SALTY Flagellin     | 8  |                    | VSDTAATVTGYADTTIALDNSTFK        | 180 | 24 | 5  | 23.15  | b3b6b7b15y6                                                                 | 2462.16 | 72.248  | 12637  | 3 | 821.39  | -13.88 |
| P06179 FLIC_SALTY Flagellin     | 9  |                    | ELAVQSANSTNSQSDDLDSIQAEITQR     | 93  | 26 | 5  | 19.63  | b8b9b13*b13y13                                                              | 2805.36 | 71.046  | 3240   | 2 | 1403.18 | 2.35   |
| P06179 FLIC_SALTY Flagellin     | 10 |                    | AQPDLAEEAAATTENPLQK             | 392 | 19 | 6  | 18.91  | b9°b9*b9y10y12y17                                                           | 1968.98 | 95.342  | 123790 | 2 | 985.00  | -1.55  |
| P06179 FLIC_SALTY Flagellin     | 11 |                    | TEVVSIGGK                       | 370 | 9  | 3  | 33.25  | b6b7b8                                                                      | 889.48  | 78.084  | 7282   | 1 | 889.48  | -18.32 |
| P06179 FLIC_SALTY Flagellin     | 12 |                    | QINSQTLGLDTLNVQQK               | 161 | 17 | 13 | 68.97  | b3b4°b4*b4b5°b5b6b8°b8°b8b10b16y12                                          | 1899.98 | 74.123  | 3324   | 2 | 950.50  | -15.03 |
| P06179 FLIC_SALTY Flagellin     | 13 |                    | DGSISINTTK                      | 339 | 10 | 3  | 29.11  | b4b5b9                                                                      | 1035.52 | 68.998  | 1639   | 2 | 518.26  | -9.55  |
| P06179 FLIC_SALTY Flagellin     | 14 |                    | INSAKDDAAGQAIANR                | 37  | 16 | 12 | 48.92  | b3*b3b4°b4*b4b7°b7b8b11y7*y7y11                                             | 1614.80 | 31.425  | 20399  | 3 | 538.94  | -10.89 |
| P06179 FLIC_SALTY Flagellin     | 15 |                    | LGADGKTEVVSIGGK                 | 363 | 16 | 5  | 27.39  | b3b12y3y7y13                                                                | 1487.79 | 58.702  | 17615  | 3 | 496.60  | -7.79  |
| P06179 FLIC_SALTY Flagellin     | 16 |                    | FDDTTGKYAK                      | 222 | 11 | 6  | 60.48  | b8y4y7y8y9y10                                                               | 1308.61 | 32.039  | 6762   | 2 | 654.81  | 2.99   |
| P06179 FLIC_SALTY Flagellin     | 17 |                    | FNSAITNLGNTVNNLTSARSR           | 432 | 21 | 5  | 31.55  | b9b10b11°b11y9                                                              | 2250.13 | 109.789 | 4931   | 2 | 1125.57 | -14.54 |
| P06179 FLIC_SALTY Flagellin     | 18 |                    | AQPDLAEEAAATTENPLQKIDAALAQVDTLR | 392 | 31 | 3  | 17.02  | b3b10b16                                                                    | 3235.66 | 104.780 | 4528   | 3 | 1079.22 | -6.87  |
| P06179 FLIC_SALTY Flagellin     | 19 |                    | YKVSDTAATVTGYADTTIALDNSTFK      | 178 | 26 | 4  | 12.62  | b7b14y7y10                                                                  | 2753.38 | 111.371 | 3762   | 3 | 918.46  | 10.37  |
| P06179 FLIC_SALTY Flagellin     | 20 |                    | AEGHNFKAQPDLAEEAAATTENPLQK      | 385 | 26 | 4  | 10.93  | b10b12°b12y10                                                               | 2752.37 | 111.944 | 1543   | 4 | 688.85  | 4.61   |
| P06179 FLIC_SALTY Flagellin     | 21 | Phosphoryl STY()   | AQVINTNSLSLLTQNNLNK             | 1   | 19 | 6  | 42.08  | b8b10b14y10y11y12                                                           | 2165.07 | 81.789  | 78485  | 2 | 1083.04 | -9.81  |
| P06179 FLIC_SALTY Flagellin     | 22 | Phosphoryl STY(10) | IDAALAQVDTLR                    | 411 | 12 | 7  | 45.88  | b5b6b8y3_HPO3y3y9y10*y10                                                    | 1365.68 | 67.033  | 4480   | 2 | 683.34  | 5.90   |
| P06179 FLIC_SALTY Flagellin     | 23 | Phosphoryl STY(9)  | DGSISINTTK                      | 339 | 10 | 8  | 33.37  | b4_H3PO4b4°b4b7°b7*b7b8y5°y5                                                | 1115.51 | 47.825  | 3959   | 2 | 558.26  | 14.88  |
| P0AA28 THIO_SALTY Thioredoxin-1 | 1  |                    | LNIDQNPGTAPK                    | 58  | 12 | 29 | 154.13 | b2*b2b4*b4b5b6°b6°b6b7b10y1y2y3y4y5y6°y6y7y8°y8*y8y9°y9*y9y10°y10y11*y11y12 | 1267.66 | 39.046  | 191279 | 2 | 634.33  | -4.43  |
| P0AA28 THIO_SALTY Thioredoxin-1 | 2  |                    | MIAPILDEIADEYQGK                | 37  | 16 | 22 | 143.93 | b2b3b4b5b12y2y3*y3y4y5°y5y6y10y11°y11y12°y12y13y14°y14y15y16                | 1805.91 | 94.327  | 161269 | 2 | 903.46  | 6.62   |
| P0AA28 THIO_SALTY Thioredoxin-1 | 3  |                    | GIPTLLLFK                       | 74  | 9  | 9  | 58.77  | b2y1y2y3y4y5y6y7y9                                                          | 1001.63 | 91.543  | 117951 | 2 | 501.32  | -10.48 |
| P0AA28 THIO_SALTY Thioredoxin-1 | 4  |                    | NGEVAATK                        | 83  | 8  | 7  | 42.12  | b1b2b5y4y6°y6y7                                                             | 789.42  | 45.975  | 8102   | 1 | 789.42  | 11.06  |
| P0AA28 THIO_SALTY Thioredoxin-1 | 5  |                    | EFLDANLA                        | 101 | 8  | 6  | 58.14  | b3b6y5y6y7*y7                                                               | 892.43  | 70.901  | 20656  | 1 | 892.43  | -7.73  |
| P0AA28 THIO_SALTY Thioredoxin-1 | 6  |                    | MIAPILDEIADEYQGKLTVAK           | 37  | 21 | 17 | 110.12 | b3b4b5b13°b13b15°b15°b15y4y5y7y13y14y15y18y19y20                            | 2318.23 | 95.420  | 145299 | 3 | 773.41  | -2.42  |

|                                        |    |                       |                                       |     |    |    |        |                                                                            |         |         |        |   |         |        |
|----------------------------------------|----|-----------------------|---------------------------------------|-----|----|----|--------|----------------------------------------------------------------------------|---------|---------|--------|---|---------|--------|
| P0AA28 THIO_SALTY Thioredoxin-1        | 7  | Phosphoryl STY(4)     | GIPTLLLLFK                            | 74  | 9  | 3  | 33.25  | b3b5b6                                                                     | 1081.61 | 44.437  | 6992   | 2 | 541.31  | 13.88  |
| P0AA28 THIO_SALTY Thioredoxin-1        | 8  | Oxidation+M(1)        | MIAPILDEIADEYQGK                      | 37  | 16 | 4  | 13.71  | b4b7y5*y5                                                                  | 1821.90 | 88.229  | 6790   | 2 | 911.46  | 6.03   |
| P25077 MDH_SALTY Malate dehydrogenase  | 1  |                       | NQLPSGSELSLYDIAPVTPGVAVD<br>LSHIPTAVK | 21  | 33 | 24 | 66.92  | b1b2*b2b3*b3b4b9*b9b10<br>b10*b10b12*b12b13b15*b<br>15y1y3y5y6y15y18y30y33 | 3388.81 | 94.445  | 228176 | 3 | 1130.27 | 2.38   |
| P25077 MDH_SALTY Malate dehydrogenase  | 2  | Carbamidomethyl+C(2)  | ACVGIITNPVNTTVAIAAEVLKK               | 111 | 23 | 18 | 90.79  | b2b3b4b5b6b8*b8b13y1y2<br>y3y4y6y8y15y18y20y23                             | 2382.34 | 105.503 | 202328 | 3 | 794.78  | -3.18  |
| P25077 MDH_SALTY Malate dehydrogenase  | 3  |                       | VAVLGAAGGIGQALALLK                    | 2   | 19 | 18 | 134.21 | b3b6b8b9b10y1y2y3y4y5y<br>6y7y9y11y12y13y15y19                             | 1735.08 | 120.379 | 198554 | 2 | 868.05  | -0.28  |
| P25077 MDH_SALTY Malate dehydrogenase  | 4  |                       | FFSQPLLLGK                            | 262 | 10 | 7  | 41.15  | b2b6y2y3y6y8y10                                                            | 1149.65 | 76.630  | 122404 | 2 | 575.33  | -10.62 |
| P25077 MDH_SALTY Malate dehydrogenase  | 5  |                       | IQNAGTEVVEAK                          | 205 | 12 | 17 | 106.91 | b2*b2b3b7b9y2y3*y3y4y5<br>y7y8y9y10*y10*y10y12                             | 1258.66 | 35.081  | 102379 | 2 | 629.83  | -4.56  |
| P25077 MDH_SALTY Malate dehydrogenase  | 6  |                       | DIQLGEDFINK                           | 301 | 11 | 10 | 75.54  | b3b6b7b9*b9b10y8y9*y9y<br>11                                               | 1291.65 | 68.501  | 91201  | 2 | 646.33  | -2.46  |
| P25077 MDH_SALTY Malate dehydrogenase  | 7  |                       | AGGGSATLSMGQAAAR                      | 217 | 16 | 21 | 138.86 | b3b6b7b9*b9b12b13b16y5<br>y6*y6y7y8y9*y9y10*y10*y<br>10y11y12y16           | 1405.68 | 40.546  | 65693  | 2 | 703.35  | -1.13  |
| P25077 MDH_SALTY Malate dehydrogenase  | 8  |                       | FGLSLVR                               | 233 | 7  | 5  | 35.01  | b2y2y4y5y6                                                                 | 791.47  | 67.618  | 56082  | 2 | 396.24  | -14.57 |
| P25077 MDH_SALTY Malate dehydrogenase  | 9  | Carbamidomethyl+C(5)  | GVVECAYVEGDGQYAR                      | 246 | 16 | 4  | 13.71  | b8y7y11*y11                                                                | 1772.81 | 50.346  | 5207   | 2 | 886.91  | 12.60  |
| P25077 MDH_SALTY Malate dehydrogenase  | 10 |                       | SNTFV AELK                            | 153 | 9  | 3  | 25.47  | b3y4y7                                                                     | 1008.53 | 55.140  | 48729  | 2 | 504.77  | -10.53 |
| P25077 MDH_SALTY Malate dehydrogenase  | 11 |                       | KPGMDR                                | 81  | 6  | 1  | 11.88  | b4                                                                         | 703.35  | 44.024  | 13543  | 1 | 703.35  | -1.74  |
| P25077 MDH_SALTY Malate dehydrogenase  | 12 |                       | GFSGEDATPALEGADVVLISAGVA<br>R         | 56  | 25 | 6  | 24.64  | b3b4b11b16y4y14                                                            | 2402.23 | 91.531  | 8701   | 2 | 1201.62 | 3.66   |
| P25077 MDH_SALTY Malate dehydrogenase  | 13 |                       | NGVEER                                | 272 | 6  | 3  | 23.13  | y3*y3y4                                                                    | 703.34  | 32.017  | 7006   | 1 | 703.34  | 9.20   |
| P25077 MDH_SALTY Malate dehydrogenase  | 14 |                       | AGVYDK                                | 134 | 6  | 4  | 34.38  | b4y3*y3y4                                                                  | 652.32  | 45.977  | 3966   | 1 | 652.32  | -14.03 |
| P25077 MDH_SALTY Malate dehydrogenase  | 15 | Carbamidomethyl+C(11) | ALQGEKGVVECAYVEGDGQYAR                | 240 | 22 | 4  | 11.33  | b5*b5y3y7                                                                  | 2399.11 | 99.646  | 96507  | 3 | 800.38  | -7.94  |
| P25077 MDH_SALTY Malate dehydrogenase  | 16 |                       | IQNAGTEVVEAKAGGGSATLSMG<br>QAAAR      | 205 | 28 | 6  | 26.43  | b3b4b7b9b14y14                                                             | 2645.34 | 120.467 | 6686   | 4 | 662.09  | 3.88   |
| P25077 MDH_SALTY Malate dehydrogenase  | 17 | Phosphoryl STY(6)     | IQNAGTEVVEAK                          | 205 | 12 | 3  | 17.94  | b4y7y11                                                                    | 1338.62 | 37.214  | 4272   | 3 | 446.88  | 0.91   |
| P25077 MDH_SALTY Malate dehydrogenase  | 18 | Oxidation+M(16)       | SIGTLSAFEQHSLDAMLDTLK                 | 279 | 21 | 3  | 11.55  | b11y4y11                                                                   | 2293.15 | 103.234 | 5782   | 3 | 765.05  | 5.22   |
| P64052 EFTS_SALTY Elongation factor Ts | 1  |                       | VASLEGDVLGSYQHGAR                     | 134 | 17 | 24 | 112.21 | b2b8*b8b9*b9b14y1y2y3y4<br>y5*y5y6*y6y8y9*y10*y10y<br>11y12*y12*y12y13y17  | 1758.85 | 59.688  | 141661 | 3 | 586.96  | -12.98 |
| P64052 EFTS_SALTY Elongation factor Ts | 2  |                       | FTGEVSLTGQPFVMEPSK                    | 222 | 18 | 8  | 40.94  | b3*b3b4b8b9y3y10y18                                                        | 1953.97 | 75.389  | 78047  | 2 | 977.49  | 3.69   |
| P64052 EFTS_SALTY Elongation factor Ts | 3  |                       | AEITASLVK                             | 1   | 9  | 7  | 52.75  | b1b5y3y4y5y6y9                                                             | 931.53  | 49.519  | 34958  | 2 | 466.27  | -13.63 |
| P64052 EFTS_SALTY Elongation factor Ts | 4  |                       | ALTEANGDIELAIENMRK                    | 25  | 18 | 7  | 16.78  | b2b6b9y1y13*y13y16                                                         | 1988.00 | 75.017  | 33203  | 3 | 663.34  | -6.32  |
| P64052 EFTS_SALTY Elongation factor Ts | 5  | Carbamidomethyl+C(8)  | TGAGMMDCKK                            | 15  | 10 | 3  | 23.88  | b3y7y8                                                                     | 1098.47 | 21.618  | 26214  | 2 | 549.74  | -2.44  |

|                                              |    |                       |                            |     |    |    |        |                                                              |         |        |       |   |         |        |
|----------------------------------------------|----|-----------------------|----------------------------|-----|----|----|--------|--------------------------------------------------------------|---------|--------|-------|---|---------|--------|
| [P64052 EFTS_SALTY Elongation factor Ts      | 6  |                       | AGNVAADGVIK                | 52  | 11 | 11 | 79.97  | b4*b4b8b9y2y4y5y6y7y8y11                                     | 1014.55 | 37.195 | 21407 | 2 | 507.78  | -7.58  |
| [P64052 EFTS_SALTY Elongation factor Ts      | 7  |                       | MAEITASLVKELR              | 0   | 13 | 4  | 25.77  | b3b5*b5b7                                                    | 1460.80 | 69.867 | 3689  | 3 | 487.60  | -12.03 |
| [P64052 EFTS_SALTY Elongation factor Ts      | 8  | Carbamidomethyl+C(13) | IDGNVAFILEVNCQTDFVAK       | 65  | 20 | 6  | 19.95  | b13*b13b14*b14y10y20                                         | 2253.11 | 69.874 | 2258  | 4 | 564.03  | -5.63  |
| [P64052 EFTS_SALTY Elongation factor Ts      | 9  |                       | VETDFAAEVAAMSK             | 267 | 14 | 7  | 25.67  | b1b2*b2b3b5b7y7                                              | 1468.69 | 22.323 | 1928  | 3 | 490.23  | -6.98  |
| [P64052 EFTS_SALTY Elongation factor Ts      | 10 |                       | IGVLVAAK                   | 151 | 8  | 5  | 53.37  | b3y4y5y6y7                                                   | 770.50  | 47.775 | 42276 | 2 | 385.75  | -19.41 |
| [P64052 EFTS_SALTY Elongation factor Ts      | 11 |                       | VLDAAVAGK                  | 95  | 9  | 4  | 50.53  | y3y4y7y8                                                     | 843.48  | 34.221 | 39667 | 2 | 422.24  | -17.66 |
| [P64052 EFTS_SALTY Elongation factor Ts      | 12 |                       | ALTEANGDIELAIENMR          | 25  | 17 | 4  | 13.09  | b11y5*y5y13                                                  | 1859.92 | 60.664 | 23355 | 2 | 930.46  | 0.72   |
| [P64052 EFTS_SALTY Elongation factor Ts      | 13 |                       | SVGQLLK                    | 240 | 7  | 6  | 35.01  | b3*b3b4*b4b5*b5                                              | 744.45  | 20.558 | 14298 | 2 | 372.73  | -18.69 |
| [P64052 EFTS_SALTY Elongation factor Ts      | 14 |                       | MVEGR                      | 214 | 5  | 1  | 11.25  | y4                                                           | 591.29  | 39.164 | 8957  | 1 | 591.29  | -5.26  |
| [P64052 EFTS_SALTY Elongation factor Ts      | 15 |                       | EYQVQLDIAMQSGKPK           | 193 | 16 | 5  | 46.93  | b3b5b6b7b8                                                   | 1834.94 | 71.414 | 5343  | 3 | 612.32  | -0.27  |
| [P64052 EFTS_SALTY Elongation factor Ts      | 16 |                       | DAGFQAFADK                 | 85  | 10 | 6  | 51.61  | b6b8y3y6*y6y8                                                | 1069.49 | 47.871 | 4100  | 2 | 535.25  | -1.71  |
| [P64052 EFTS_SALTY Elongation factor Ts      | 17 |                       | QLAMHVAASKPEFVKPEDVSADVVEK | 167 | 26 | 6  | 43.13  | b4b6b7b8b9y12                                                | 2824.43 | 48.796 | 3535  | 6 | 471.58  | -10.11 |
| [P64052 EFTS_SALTY Elongation factor Ts      | 18 |                       | FEVGEGIEK                  | 258 | 9  | 4  | 33.25  | b3b4*b4b8                                                    | 1007.49 | 96.621 | 2034  | 1 | 1007.49 | -16.84 |
| [P64052 EFTS_SALTY Elongation factor Ts      | 19 |                       | KALTEANGDIELAIENMR         | 24  | 18 | 4  | 27.6   | y6y9y14y15                                                   | 1988.03 | 67.483 | 15067 | 2 | 994.52  | 7.92   |
| [P64052 EFTS_SALTY Elongation factor Ts      | 20 |                       | FEVGEGIEKVETDFAAEVAAMSK    | 258 | 23 | 5  | 13.64  | b5b9*b9y4y13                                                 | 2457.18 | 92.617 | 4997  | 2 | 1229.09 | -3.97  |
| [P64052 EFTS_SALTY Elongation factor Ts      | 21 |                       | KFTGEVSLTGQPFVMEPSK        | 221 | 19 | 9  | 47.17  | b6b7y5y6*y6y9*y9y11y13                                       | 2082.07 | 79.194 | 3180  | 2 | 1041.54 | 4.81   |
| [P64052 EFTS_SALTY Elongation factor Ts      | 22 |                       | EIAEKMVEGR                 | 209 | 10 | 5  | 22.12  | b6*b6y3y8*y8                                                 | 1161.60 | 46.793 | 2944  | 2 | 581.30  | 2.31   |
| [P64052 EFTS_SALTY Elongation factor Ts      | 23 | Oxidation+M(14)       | FTGEVSLTGQPFVMEPSK         | 222 | 18 | 9  | 40.94  | b4*b4b5b14y5*y5y8y13y14                                      | 1969.95 | 74.214 | 3791  | 2 | 985.48  | -5.52  |
| [P64052 EFTS_SALTY Elongation factor Ts      | 24 | Oxidation+M(16)       | ALTEANGDIELAIENMRK         | 25  | 18 | 5  | 31.45  | b9b10y4y11y13                                                | 2004.03 | 72.863 | 2836  | 2 | 1002.52 | 9.75   |
| [P64052 EFTS_SALTY Elongation factor Ts      | 25 | Carbamidomethyl+C(7)  | GAGMMDCKK                  | 16  | 9  | 0  | 3.14   |                                                              | 997.42  | 21.581 | 9308  | 2 | 499.21  | -9.00  |
| [P64052 EFTS_SALTY Elongation factor Ts      | 26 |                       | VASLEGDLVLS                | 134 | 11 | 0  | 7.54   |                                                              | 1046.52 | 59.655 | 4605  | 2 | 523.77  | -11.66 |
| [P64052 EFTS_SALTY Elongation factor Ts      | 27 |                       | AEITASLV                   | 1   | 8  | 0  | 2.51   |                                                              | 803.44  | 49.506 | 2438  | 1 | 803.44  | -12.08 |
| [P41031 CY_SALTY Thiosulfate-binding protein | 1  |                       | AYLNWLYSPQAQTIIHHYYR       | 265 | 21 | 7  | 20.48  | b2b5b10y11y13y15y21                                          | 2664.33 | 94.261 | 87239 | 3 | 888.78  | 3.21   |
| [P41031 CY_SALTY Thiosulfate-binding protein | 2  |                       | ELFAALNPPFEQQWAK           | 37  | 16 | 22 | 92.68  | b2*b2b3*b3b5*b5b6b7b11*b11b15y1y2y4y9*y9y10*y10y12*y12y13y16 | 1888.97 | 90.590 | 86678 | 2 | 944.99  | 5.95   |
| [P41031 CY_SALTY Thiosulfate-binding protein | 3  |                       | VNNPEIMGK                  | 286 | 9  | 10 | 64     | b2b3y2y3y4y6y7y8*y8y9                                        | 1001.50 | 36.704 | 84561 | 2 | 501.25  | -9.20  |
| [P41031 CY_SALTY Thiosulfate-binding protein | 4  |                       | LPNNSSPFYSTMGFLVR          | 110 | 17 | 15 | 102.51 | b5b6b7b8b15y2y3y5y8y9y11y12y13*y13y17                        | 1929.97 | 92.708 | 71402 | 2 | 965.49  | 6.83   |
| [P41031 CY_SALTY Thiosulfate-binding protein | 5  |                       | NVEVFDTGGR                 | 189 | 10 | 18 | 101.39 | b2b3b4*b4b5b8b10y1y2y4*y4y5y6y7*y7y8*y8y10                   | 1093.52 | 47.803 | 57966 | 2 | 547.27  | -3.35  |

|                                              |    |                                                      |                                                             |     |    |    |       |                                                 |         |         |        |   |         |        |
|----------------------------------------------|----|------------------------------------------------------|-------------------------------------------------------------|-----|----|----|-------|-------------------------------------------------|---------|---------|--------|---|---------|--------|
| [P41031 CY_SALTY Thiosulfate-binding protein | 6  |                                                      | LIPADWQSR                                                   | 101 | 9  | 14 | 81.27 | b2b6°b6b7°b7b8°b8y3°y3y4°y4y6y7y9               | 1085.58 | 53.551  | 54339  | 2 | 543.30  | 9.56   |
| [P41031 CY_SALTY Thiosulfate-binding protein | 7  |                                                      | QALAILQGLK                                                  | 71  | 10 | 5  | 36.38 | b3°b3y5y6y7                                     | 1054.65 | 75.740  | 51233  | 2 | 527.83  | -8.45  |
| [P41031 CY_SALTY Thiosulfate-binding protein | 8  |                                                      | TEQFMTQFLK                                                  | 179 | 10 | 7  | 22.12 | b2b3b10y3y6y10°y10                              | 1272.63 | 76.308  | 46115  | 2 | 636.82  | -1.25  |
| [P41031 CY_SALTY Thiosulfate-binding protein | 9  |                                                      | FGSWPEVMK                                                   | 311 | 9  | 6  | 25.47 | b2b4b7y2y5y9                                    | 1080.52 | 69.708  | 40994  | 2 | 540.76  | -2.37  |
| [P41031 CY_SALTY Thiosulfate-binding protein | 10 |                                                      | GATTTFAER                                                   | 199 | 9  | 6  | 38.49 | b3°b3y4y5y6y9                                   | 953.46  | 31.465  | 30570  | 2 | 477.23  | -8.58  |
| [P41031 CY_SALTY Thiosulfate-binding protein | 11 |                                                      | RPLTAAMLLLAGQAQATELLNS<br>SYDVSRELF AALNPPFEQQWAKD<br>NGGDK | 8   | 51 | 3  | 29.87 | y4y5y8                                          | 5558.85 | 102.633 | 15981  | 4 | 1390.47 | 2.02   |
| [P41031 CY_SALTY Thiosulfate-binding protein | 12 |                                                      | LIFPNPK                                                     | 146 | 7  | 5  | 43.25 | b5y4y5°y5y6                                     | 828.48  | 56.513  | 77366  | 2 | 414.75  | -16.21 |
| [P41031 CY_SALTY Thiosulfate-binding protein | 13 |                                                      | GLGDVLISFESEVNNIR                                           | 208 | 17 | 7  | 37.44 | b13y6y7°y7°y7y9y10                              | 1861.93 | 59.785  | 41017  | 3 | 621.31  | -21.11 |
| [P41031 CY_SALTY Thiosulfate-binding protein | 14 |                                                      | QYEAQGFEVVIPK                                               | 226 | 13 | 3  | 16.52 | b5b10y11                                        | 1507.76 | 71.530  | 13312  | 2 | 754.39  | -10.36 |
| [P41031 CY_SALTY Thiosulfate-binding protein | 15 |                                                      | NVQANGTEK                                                   | 253 | 9  | 12 | 89.51 | b3b7b8°b8y3y5y6y7°y7°y7y8°y8                    | 960.49  | 32.869  | 4341   | 2 | 480.75  | 19.06  |
| [P41031 CY_SALTY Thiosulfate-binding protein | 16 |                                                      | TSGNAR                                                      | 153 | 6  | 1  | 11.88 | b5                                              | 605.29  | 28.910  | 3310   | 1 | 605.29  | -14.62 |
| [P41031 CY_SALTY Thiosulfate-binding protein | 17 |                                                      | TNILAEFPVAVVDKNVQANGTEK                                     | 239 | 23 | 18 | 97.99 | b3b5b6y4y5°y5y6°y6°y6y8°y8°y8y12y13y16y18y19y20 | 2544.31 | 91.493  | 156702 | 3 | 848.77  | -0.86  |
| [P41031 CY_SALTY Thiosulfate-binding protein | 18 |                                                      | YTYLAAWGAADNADGGDKAK                                        | 159 | 20 | 3  | 11.82 | b9y7y14                                         | 2057.96 | 59.615  | 44601  | 2 | 1029.48 | 0.83   |
| [P41031 CY_SALTY Thiosulfate-binding protein | 19 |                                                      | NVEVFDTGGRGATTTFAER                                         | 189 | 19 | 10 | 51.44 | b3b12°b12b13°b13b14y5y6y9y14                    | 2027.98 | 69.041  | 25659  | 3 | 676.66  | -0.18  |
| [P41031 CY_SALTY Thiosulfate-binding protein | 20 |                                                      | TSGNARYTYLAAWGAADNADGGDK                                    | 153 | 24 | 6  | 13.24 | b6°b6b11°b11y4y6                                | 2445.13 | 91.489  | 5094   | 2 | 1223.07 | 9.19   |
| [P41031 CY_SALTY Thiosulfate-binding protein | 21 |                                                      | VNNPEIMGKQADK                                               | 286 | 13 | 6  | 37.48 | b5y5y7°y7y8y10                                  | 1443.71 | 63.201  | 4720   | 2 | 722.36  | -11.58 |
| [P41031 CY_SALTY Thiosulfate-binding protein | 22 |                                                      | GNPKNIHDWSDLVR                                              | 128 | 14 | 3  | 15.39 | b3y6y9                                          | 1650.81 | 96.777  | 3976   | 2 | 825.91  | -15.08 |
| [P41031 CY_SALTY Thiosulfate-binding protein | 23 |                                                      | VEEKFGSWPEVMK                                               | 307 | 13 | 3  | 16.52 | b10y9y11                                        | 1565.76 | 60.564  | 1654   | 3 | 522.59  | -3.12  |
| [P41031 CY_SALTY Thiosulfate-binding protein | 24 | Oxidation+M(7)                                       | VNNPEIMGK                                                   | 286 | 9  | 5  | 38.49 | b4y4y7°y7y8                                     | 1017.50 | 38.096  | 5559   | 2 | 509.25  | -7.32  |
| [P41031 CY_SALTY Thiosulfate-binding protein | 25 |                                                      | EVFDTGGR                                                    | 191 | 8  | 3  | 19.62 | b3°b3b4                                         | 880.41  | 47.841  | 3278   | 1 | 880.41  | -1.94  |
| [P41031 CY_SALTY Thiosulfate-binding protein | 26 |                                                      | GATTTFAER                                                   | 199 | 9  | 0  | 2.51  |                                                 | 935.45  | 31.495  | 14577  | 2 | 468.23  | -3.26  |
| [P0A1P8 GLRX1_SALTY Glutaredoxin-1           | 1  |                                                      | TVGKPVETVPQIFVDQK                                           | 50  | 17 | 10 | 51.41 | b3b9y2°y2y3y4y5y6y8y17                          | 1885.02 | 65.611  | 40941  | 3 | 629.01  | -12.63 |
| [P0A1P8 GLRX1_SALTY Glutaredoxin-1           | 2  | Carbamidomethyl+C(11)<br>;Carbamidomethyl+C(14)<br>) | MFTVIFGRGPCPYCVR                                            | 0   | 16 | 7  | 40.4  | b7°b7b9y5y10y11y12                              | 1959.93 | 78.067  | 28354  | 3 | 653.98  | -5.73  |
| [P0A1P8 GLRX1_SALTY Glutaredoxin-1           | 3  |                                                      | ENLNLFA                                                     | 80  | 7  | 6  | 35.01 | b3°b3b5°b5y6°y6                                 | 820.43  | 39.674  | 8222   | 2 | 410.72  | 12.87  |
| [P0AA07 PTHP_SALTY Phohocarrier protein HPr  | 1  |                                                      | MFQQEVTITAPNGLHTRPAAQFVK                                    | 0   | 24 | 7  | 23.15 | b2b3b5b6b7°b22y15                               | 2684.37 | 64.162  | 132434 | 4 | 671.85  | -8.91  |
| [P0AA07 PTHP_SALTY Phohocarrier protein HPr  | 2  |                                                      | GFTSEITVTSNGK                                               | 27  | 13 | 16 | 95.95 | b2b3°b3b8b9b10b11°b11y3y5y6°y6°y6y9°y9y10       | 1340.67 | 51.278  | 20826  | 2 | 670.84  | -0.91  |
| [P0AA07 PTHP_SALTY Phohocarrier protein HPr  | 3  |                                                      | LMAELE                                                      | 79  | 6  | 5  | 34.38 | y3°y3y4y5°y5                                    | 705.36  | 41.634  | 5536   | 1 | 705.36  | 14.10  |

|                                            |    |                    |                                        |     |    |    |        |                                                                     |         |        |        |   |         |        |
|--------------------------------------------|----|--------------------|----------------------------------------|-----|----|----|--------|---------------------------------------------------------------------|---------|--------|--------|---|---------|--------|
| P0AA07 PTHP_SALTY Phohocarrier protein HPr | 4  |                    | LQTLGLTQGTVVTTISAEGEDEQKA<br>VEHLVK    | 49  | 30 | 23 | 134.63 | b3°b3b4°b4b5b6°b6b10°b10b11°b11y3y11y13y16y17y18y19y20y22°y22y24y26 | 3193.67 | 82.258 | 409249 | 4 | 799.17  | -9.33  |
| P0AA07 PTHP_SALTY Phohocarrier protein HPr | 5  |                    | GFTSEITVTSNGKSASAK                     | 27  | 18 | 9  | 39.18  | b3°b3b4b6b12y10y12°y12y15                                           | 1784.92 | 62.674 | 2527   | 2 | 892.97  | 12.11  |
| P0AA07 PTHP_SALTY Phohocarrier protein HPr | 6  |                    | EAKGFTSEITVTSNGK                       | 24  | 16 | 3  | 13.71  | b8b10y4                                                             | 1668.83 | 74.920 | 1683   | 3 | 556.95  | -6.73  |
| P0AA07 PTHP_SALTY Phohocarrier protein HPr | 7  | Phosphoryl STY(3)  | GFTSEITVTSNGK                          | 27  | 13 | 6  | 35.26  | y3y6°y6y9y10°y10                                                    | 1420.61 | 59.783 | 14392  | 3 | 474.21  | -8.68  |
| P0A1Z2 SKP_SALTY Chaperone protein skp     | 1  |                    | IAIVNMGNLFFQVVAQK                      | 23  | 16 | 17 | 90.63  | b2b3b4b6°b6b8y1y2y3y6y7y9y11y12y13°y13y16                           | 1773.97 | 90.582 | 171714 | 2 | 887.49  | 1.65   |
| P0A1Z2 SKP_SALTY Chaperone protein skp     | 2  |                    | TGVSNTLENEFK                           | 39  | 12 | 13 | 71.69  | b1b3y1y2y5°y5y6y7°y7y8y9y10y12                                      | 1338.65 | 58.576 | 127219 | 2 | 669.83  | 1.00   |
| P0A1Z2 SKP_SALTY Chaperone protein skp     | 3  |                    | VANDQSIDL VVDANTVAYNSSDV<br>K DITADVLK | 126 | 32 | 15 | 33.12  | b1b2b5b8b10°b10b12°b12b18b31°b31y1y15y17y32                         | 3392.70 | 90.544 | 83981  | 3 | 1131.57 | -0.58  |
| P0A1Z2 SKP_SALTY Chaperone protein skp     | 4  |                    | AQAFEKDR                               | 97  | 8  | 13 | 69.39  | b2°b2b3b6y1y2°y2y3°y3y4y5y6y8                                       | 964.47  | 18.265 | 9780   | 2 | 482.74  | -10.88 |
| P0A1Z2 SKP_SALTY Chaperone protein skp     | 5  |                    | AAELQK                                 | 53  | 6  | 4  | 34.38  | b4b5°b5y5                                                           | 659.38  | 32.018 | 6941   | 1 | 659.38  | 14.90  |
| P0A1Z2 SKP_SALTY Chaperone protein skp     | 6  |                    | VANDQSIDL VVDANTVAYNSSDV<br>K          | 126 | 24 | 4  | 22.54  | b10b12y7y8                                                          | 2537.19 | 99.946 | 3943   | 2 | 1269.10 | -17.42 |
| P0A1Z2 SKP_SALTY Chaperone protein skp     | 7  |                    | WLLAAGLGLAMVTSQAADK                    | 3   | 20 | 5  | 20.73  | b17y13y14y16°y16                                                    | 1987.03 | 87.208 | 1571   | 3 | 663.02  | -17.82 |
| P0A1Z2 SKP_SALTY Chaperone protein skp     | 8  |                    | TGVSNTLENEFKGR                         | 39  | 14 | 4  | 15.39  | b5°b5b8y5                                                           | 1551.76 | 68.943 | 28809  | 2 | 776.39  | -8.10  |
| P0A1Z2 SKP_SALTY Chaperone protein skp     | 9  |                    | LEKDVMSQR                              | 82  | 9  | 5  | 25.47  | b4y3°y3°y3y7                                                        | 1105.55 | 48.828 | 4779   | 2 | 553.28  | -13.47 |
| P0A1Z2 SKP_SALTY Chaperone protein skp     | 10 |                    | MQRLQSMK                               | 67  | 8  | 6  | 27.86  | b5b6°b6°b6y3°y3                                                     | 1021.52 | 30.167 | 3286   | 2 | 511.27  | -3.47  |
| P0A1Z2 SKP_SALTY Chaperone protein skp     | 11 |                    | LQSMKAGSDR                             | 70  | 10 | 8  | 51.61  | b7°b7b9°b9y5y7y9°y9                                                 | 1092.54 | 32.805 | 2037   | 2 | 546.77  | -10.50 |
| P0A1Z2 SKP_SALTY Chaperone protein skp     | 12 | Phosphoryl STY(13) | WLLAAGLGLAMVTSQAADK                    | 3   | 20 | 5  | 18.1   | b13y7y12_H3PO4<br>y12y15°y15                                        | 2067.04 | 69.018 | 8430   | 2 | 1034.02 | 6.02   |
| P0A1Z2 SKP_SALTY Chaperone protein skp     | 13 | Oxidation+M(11)    | WLLAAGLGLAMVTSQAADK                    | 3   | 20 | 5  | 21.24  | y5°y5y9y10°y10                                                      | 2003.06 | 86.281 | 14895  | 2 | 1002.04 | -0.12  |
| P0A1Z2 SKP_SALTY Chaperone protein skp     | 14 |                    | QAFEKDR                                | 98  | 7  | 1  | 8.36   | b4                                                                  | 893.45  | 18.297 | 2936   | 2 | 447.23  | 3.42   |
| Q8ZK80 RL9_SALTY 50S ribosomal protein L9  | 1  |                    | NVEYFEAR                               | 42  | 8  | 5  | 46.89  | y2y3y4y5y6                                                          | 1027.48 | 47.466 | 95324  | 2 | 514.24  | -4.40  |
| Q8ZK80 RL9_SALTY 50S ribosomal protein L9  | 2  |                    | VANLGLSGDQVNVK                         | 8   | 14 | 11 | 94.36  | b3y3y4y6y7y8°y8y9y10y11y14                                          | 1413.77 | 57.034 | 86958  | 2 | 707.39  | -1.47  |
| Q8ZK80 RL9_SALTY 50S ribosomal protein L9  | 3  |                    | DIADAVTAAGVDVAK                        | 97  | 15 | 15 | 129.99 | b2b3b4b5°b5b6b10y4y5y6y7y9y10y11y13                                 | 1415.74 | 66.951 | 82116  | 2 | 708.37  | 0.69   |
| Q8ZK80 RL9_SALTY 50S ribosomal protein L9  | 4  |                    | INALETVTIASK                           | 71  | 12 | 4  | 17.94  | b3y9y11y12                                                          | 1259.72 | 61.620 | 62128  | 2 | 630.36  | -3.97  |
| Q8ZK80 RL9_SALTY 50S ribosomal protein L9  | 5  |                    | MQVILLDK                               | 0   | 8  | 3  | 35.64  | y3y4y5                                                              | 959.55  | 64.880 | 80145  | 2 | 480.28  | -13.93 |
| Q8ZK80 RL9_SALTY 50S ribosomal protein L9  | 6  |                    | TTGEHEVNFQVHSEVFAK                     | 123 | 18 | 3  | 12.58  | b5y11y13                                                            | 2058.96 | 95.502 | 8486   | 3 | 686.99  | -13.40 |
| Q8ZK80 RL9_SALTY 50S ribosomal protein L9  | 7  |                    | INALETVTIASKAGDEGK                     | 71  | 18 | 4  | 33.63  | y5y6y7y9                                                            | 1816.94 | 63.240 | 11070  | 2 | 908.97  | -14.78 |
| Q8ZK80 RL9_SALTY 50S ribosomal protein L9  | 8  |                    | RAELEAK                                | 50  | 7  | 4  | 52.28  | b3b6y3y6                                                            | 816.45  | 54.301 | 8880   | 1 | 816.45  | -13.68 |
| Q8ZK80 RL9_SALTY 50S ribosomal protein L9  | 9  |                    | NVEYFEARR                              | 42  | 9  | 4  | 37.97  | b3b5y5y7                                                            | 1183.58 | 54.298 | 3392   | 2 | 592.29  | -7.22  |



|                                                         |    |                   |                              |     |    |    |       |                                                                 |         |         |       |   |        |        |
|---------------------------------------------------------|----|-------------------|------------------------------|-----|----|----|-------|-----------------------------------------------------------------|---------|---------|-------|---|--------|--------|
| Q8ZK80 RL9_SALTY 50S ribosomal protein L9               | 10 |                   | KNVEYFEAR                    | 41  | 9  | 11 | 81.27 | b5b6°b6°b6b7°b7y3y4y6y7°y7                                      | 1155.56 | 46.744  | 2728  | 2 | 578.29 | -13.42 |
| Q8ZK80 RL9_SALTY 50S ribosomal protein L9               | 11 | Phosphoryl STY(7) | DIADAVTAAGVDVAK              | 97  | 15 | 8  | 38.01 | b4b6°b6y8y9_HPO3y9y11°y11y13_HPO3 y13                           | 1495.69 | 48.743  | 10055 | 2 | 748.35 | -1.22  |
| Q8ZK80 RL9_SALTY 50S ribosomal protein L9               | 12 | Phosphoryl STY(6) | VANLGSLGDQVNVK               | 8   | 14 | 12 | 62.95 | b9b13°b13y7°y7*y7y8y9_H3PO4 y10_H3PO4 y9*y9y10y11_H3PO4 y11°y11 | 1493.72 | 45.978  | 5496  | 3 | 498.58 | -5.31  |
| P0A1S0 IHFA_SALTY Integration host factor subunit alpha | 1  |                   | TGEDIPITAR                   | 66  | 10 | 8  | 61.62 | b3°b3b4y5y6y7y8y10                                              | 1072.56 | 43.488  | 87725 | 2 | 536.78 | -6.49  |
| P0A1S0 IHFA_SALTY Integration host factor subunit alpha | 2  |                   | LSGFGNFDLR                   | 45  | 10 | 4  | 29.11 | y2y3y8y9                                                        | 1125.56 | 73.103  | 19120 | 2 | 563.29 | -4.66  |
| P0A1S0 IHFA_SALTY Integration host factor subunit alpha | 3  |                   | ELVELFFEEIR                  | 24  | 11 | 11 | 39.23 | b2b4b9°b9y2y4y7°y7y8°y8 y11                                     | 1423.74 | 59.732  | 15212 | 3 | 475.25 | -4.20  |
| P0A1S0 IHFA_SALTY Integration host factor subunit alpha | 4  |                   | ALENGEQVK                    | 36  | 9  | 9  | 37.97 | b5b8°b8°b8b9°b9y4*y4y7                                          | 987.52  | 45.996  | 7464  | 2 | 494.26 | 7.54   |
| P0A1S0 IHFA_SALTY Integration host factor subunit alpha | 5  |                   | ELVELFFEEIRR                 | 24  | 12 | 8  | 38.61 | b1b3b8°b8b9°b9b10y2                                             | 1579.84 | 54.291  | 5333  | 4 | 395.71 | -6.49  |
| P0A1S0 IHFA_SALTY Integration host factor subunit alpha | 6  |                   | AEMSEYLFDK                   | 5   | 10 | 4  | 22.12 | b9y3y9°y9                                                       | 1232.54 | 54.345  | 4127  | 3 | 411.52 | -11.79 |
| P0A1S0 IHFA_SALTY Integration host factor subunit alpha | 7  |                   | LSGFGNFDLRDK                 | 45  | 12 | 8  | 29.86 | b6°b6b10y7°y7*y7y8*y8                                           | 1368.67 | 59.743  | 19492 | 3 | 456.90 | -12.58 |
| P0A1S0 IHFA_SALTY Integration host factor subunit alpha | 8  |                   | MALTKAEMSEYLFDK              | 0   | 15 | 3  | 22.55 | b3b7b9                                                          | 1776.86 | 77.255  | 4017  | 3 | 592.96 | 0.96   |
| P0A1S0 IHFA_SALTY Integration host factor subunit alpha | 9  |                   | ALENGEQVKLSGFGNFDLR          | 36  | 19 | 5  | 21.13 | b5b13°b13b14y7                                                  | 2094.05 | 67.225  | 2483  | 3 | 698.69 | -4.78  |
| P02906 SUBI_SALTY Sulfate-binding protein               | 1  |                   | YLYSPEGQELAAK                | 263 | 13 | 10 | 51.07 | b3b4°b4y2y6y9y10y11°y11 y13                                     | 1468.73 | 51.224  | 91750 | 2 | 734.87 | 0.58   |
| P02906 SUBI_SALTY Sulfate-binding protein               | 2  |                   | FEIVTPSESILAEPTVSVVDK        | 226 | 21 | 8  | 25.72 | b2b5b8b13b14°b14y1y21                                           | 2260.22 | 78.052  | 53755 | 3 | 754.08 | 12.53  |
| P02906 SUBI_SALTY Sulfate-binding protein               | 3  |                   | NVEVLDSGAR                   | 183 | 10 | 11 | 74.12 | b2b3°b3b6y4y5y6y7y8y10*y10                                      | 1059.54 | 40.712  | 50539 | 2 | 530.27 | -5.88  |
| P02906 SUBI_SALTY Sulfate-binding protein               | 4  |                   | AVAEAYLK                     | 255 | 8  | 8  | 46.89 | b1b2b4b6y2y4y6y8                                                | 864.47  | 41.559  | 42037 | 2 | 432.74 | -14.19 |
| P02906 SUBI_SALTY Sulfate-binding protein               | 5  |                   | GSTNTFVER                    | 193 | 9  | 5  | 33.25 | y3y5y6*y6y9                                                     | 1010.48 | 32.983  | 38137 | 2 | 505.75 | -5.50  |
| P02906 SUBI_SALTY Sulfate-binding protein               | 6  |                   | DIQLLNVSYPDTRELYEQYNK        | 20  | 21 | 8  | 23.49 | b9b13°b13y2y4y10y11*y11 l                                       | 2601.32 | 78.123  | 10087 | 3 | 867.78 | 12.39  |
| P02906 SUBI_SALTY Sulfate-binding protein               | 7  |                   | QATSVINGIEADVVTALAYDVD AIAER | 66  | 28 | 7  | 26.62 | b3b5b11y3y7y10y11                                               | 2917.51 | 129.068 | 9896  | 3 | 973.17 | -3.10  |
| P02906 SUBI_SALTY Sulfate-binding protein               | 8  |                   | AQKDHFANGGTFDQISK            | 311 | 17 | 6  | 22.21 | b5y2y10°y10y12y13                                               | 1863.90 | 70.822  | 7122  | 2 | 932.45 | 1.31   |
| P02906 SUBI_SALTY Sulfate-binding protein               | 9  |                   | AFSAHWK                      | 41  | 7  | 3  | 35.01 | b6y3y6                                                          | 846.42  | 103.199 | 5923  | 1 | 846.42 | -1.95  |
| P02906 SUBI_SALTY Sulfate-binding protein               | 10 |                   | NFYRPRDADVAK                 | 276 | 12 | 5  | 29.86 | b8b9°b9y3y11                                                    | 1451.73 | 74.231  | 2306  | 2 | 726.37 | -5.89  |
| P02906 SUBI_SALTY Sulfate-binding protein               | 11 |                   | QIHDWNDLIKPGSVITPNPK         | 126 | 21 | 12 | 35.63 | b3°b3b5°b5b6b12°b12°b12b15y4*y4y19                              | 2371.24 | 74.173  | 29185 | 4 | 593.57 | -15.86 |
| P02906 SUBI_SALTY Sulfate-binding protein               | 12 |                   | DIQLLNVSYPDTR                | 20  | 13 | 3  | 21.29 | b11y7y8                                                         | 1533.76 | 77.235  | 2294  | 2 | 767.38 | -18.94 |
| P02906 SUBI_SALTY Sulfate-binding protein               | 13 |                   | IDKNWIK                      | 96  | 7  | 3  | 35.01 | b5y4y6                                                          | 916.52  | 49.498  | 21861 | 2 | 458.77 | -1.73  |
| P02906 SUBI_SALTY Sulfate-binding protein               | 14 |                   | AFSAHWKQETGDNVVIR            | 41  | 17 | 3  | 21.75 | b7b8b10                                                         | 1957.97 | 68.489  | 10592 | 3 | 653.33 | -11.41 |
| P02906 SUBI_SALTY Sulfate-binding protein               | 15 |                   | NVEVLDSGARGSTNTFVER          | 183 | 19 | 7  | 28.4  | b4b6°b6b9°b9b11y9                                               | 2051.02 | 54.289  | 2278  | 4 | 513.51 | 4.64   |

|                                             |    |                 |                                  |     |    |    |        |                                                        |         |         |        |   |         |        |
|---------------------------------------------|----|-----------------|----------------------------------|-----|----|----|--------|--------------------------------------------------------|---------|---------|--------|---|---------|--------|
| P0A2A7 RL30_SALTY 50S ribosomal protein L30 | 1  |                 | ATLLGLGLR                        | 21  | 9  | 6  | 52.75  | b5y3y5y6y7y9                                           | 913.57  | 74.795  | 47887  | 2 | 457.29  | -12.29 |
| P0A2A7 RL30_SALTY 50S ribosomal protein L30 | 2  |                 | GMVNAVSMFMVK                     | 45  | 11 | 19 | 111.51 | b2b4b6b7b9y1y2y4y5y7y8*y8y9*y9y10*y10y11*y11           | 1182.60 | 74.141  | 33850  | 2 | 591.80  | -0.93  |
| P0A2A7 RL30_SALTY 50S ribosomal protein L30 | 3  |                 | EDTPAVRGMVNAVSMFMVK              | 38  | 18 | 3  | 12.58  | b12y11y13                                              | 1950.97 | 101.660 | 7252   | 2 | 975.99  | -3.44  |
| P0A2A7 RL30_SALTY 50S ribosomal protein L30 | 4  |                 | GMVNAVSMFMKVEE                   | 45  | 14 | 5  | 25.67  | b4b8b13*b13y12                                         | 1539.77 | 96.478  | 2112   | 2 | 770.39  | 8.40   |
| P0A7W4 RS5_SALTY 30S ribosomal protein S5   | 1  |                 | VFMQPASEGTGIIAGGAMR              | 93  | 19 | 21 | 197.3  | b2b3b4b5b11b12b13b14y3y4y5y6y7y10y11y12y13y14y15y17y19 | 1892.95 | 68.716  | 163757 | 2 | 946.98  | 5.48   |
| P0A7W4 RS5_SALTY 30S ribosomal protein S5   | 2  |                 | AYGSTNPINVVVR                    | 126 | 12 | 13 | 79.63  | b1b2b3b8y2y4*y4y6y7y8y9y10y12                          | 1290.68 | 51.648  | 138714 | 2 | 645.84  | -3.88  |
| P0A7W4 RS5_SALTY 30S ribosomal protein S5   | 3  |                 | ATIDGLENMNSPEMVA AK              | 138 | 18 | 18 | 111.08 | b2b5*b5b11b14b15*b15y2y3y4y7y10y11y12y13y14y15y18      | 1890.90 | 63.873  | 85530  | 2 | 945.95  | 4.58   |
| P0A7W4 RS5_SALTY 30S ribosomal protein S5   | 4  |                 | ATIDGLENMNSPEMVA AKR             | 138 | 19 | 9  | 69.86  | b11y3y4y9y10y11y12y13*y13                              | 2046.98 | 59.550  | 82474  | 3 | 683.00  | -6.32  |
| P0A7W4 RS5_SALTY 30S ribosomal protein S5   | 5  |                 | EVPA AIQK                        | 54  | 8  | 6  | 35.64  | y2*y2y3y5y6y8                                          | 855.48  | 30.281  | 27040  | 2 | 428.24  | -12.70 |
| P0A7W4 RS5_SALTY 30S ribosomal protein S5   | 6  |                 | VGFGYGK                          | 45  | 7  | 4  | 35.01  | y2y3y5y6                                               | 727.37  | 40.473  | 21694  | 2 | 364.19  | -11.50 |
| P0A7W4 RS5_SALTY 30S ribosomal protein S5   | 7  |                 | NMINVALNNGTLQHPVK                | 69  | 17 | 3  | 13.09  | b7b11y10                                               | 1862.97 | 63.749  | 15336  | 3 | 621.66  | -10.75 |
| P0A7W4 RS5_SALTY 30S ribosomal protein S5   | 8  |                 | AVLEVAGVHNVLAK                   | 112 | 14 | 11 | 97.16  | b3b4b11y3y6y8y9y10y11*y11y12                           | 1419.80 | 61.251  | 216782 | 3 | 473.94  | -20.38 |
| P0A7W4 RS5_SALTY 30S ribosomal protein S5   | 9  |                 | LIAVNR                           | 14  | 6  | 2  | 23.13  | y4y5                                                   | 685.43  | 33.513  | 22418  | 1 | 685.43  | -5.34  |
| P0A7W4 RS5_SALTY 30S ribosomal protein S5   | 10 |                 | AMEK                             | 62  | 4  | 1  | 10.62  | y3                                                     | 478.23  | 54.918  | 4584   | 1 | 478.23  | -3.77  |
| P0A7W4 RS5_SALTY 30S ribosomal protein S5   | 11 |                 | RNMINVALNNGTLQHPVK               | 68  | 18 | 3  | 12.58  | b3b5y17                                                | 2019.06 | 59.678  | 18099  | 3 | 673.69  | -14.87 |
| P0A7W4 RS5_SALTY 30S ribosomal protein S5   | 12 |                 | GVHTGSRVFMQPASEGTGIIAGGAMR       | 86  | 26 | 7  | 16.79  | b7b14*b14b16y13*y13y22                                 | 2587.30 | 101.521 | 9321   | 3 | 863.10  | 4.62   |
| P0A7W4 RS5_SALTY 30S ribosomal protein S5   | 13 |                 | ATIDGLENMNSPEMVA AKR             | 138 | 19 | 4  | 19.12  | b5b7*b7b13                                             | 2047.01 | 86.267  | 4311   | 3 | 683.01  | 8.71   |
| P0A7W4 RS5_SALTY 30S ribosomal protein S5   | 14 |                 | MAHIEKQAGELQEK                   | 0   | 14 | 6  | 15.39  | b4y5*y5y7*y7*y7                                        | 1611.82 | 61.932  | 3090   | 4 | 403.71  | 2.95   |
| P0A7W4 RS5_SALTY 30S ribosomal protein S5   | 15 |                 | AYGSTNPINVVVRATIDGLENMNSPEMVA AK | 126 | 30 | 3  | 11.06  | b7y7y10                                                | 3162.53 | 78.803  | 2312   | 3 | 1054.85 | -8.03  |
| P0A7W4 RS5_SALTY 30S ribosomal protein S5   | 16 | Oxidation+M(18) | VFMQPASEGTGIIAGGAMR              | 93  | 19 | 4  | 12.16  | b3y12y16*y16                                           | 1908.95 | 121.348 | 19825  | 2 | 954.98  | 11.96  |
| P0A7W4 RS5_SALTY 30S ribosomal protein S5   | 17 | Oxidation+M(14) | ATIDGLENMNSPEMVA AKR             | 138 | 19 | 6  | 15.95  | b4*b4b11*b11y10y16                                     | 2062.99 | 46.750  | 3022   | 4 | 516.50  | -1.54  |
| O54297 RS4_SALTY 30S ribosomal protein S4   | 1  |                 | AALELAEQR                        | 156 | 9  | 14 | 65.25  | b2b3b7y1y2*y2y4y5y6*y6*y6y7*y7y9                       | 1000.54 | 43.885  | 115024 | 2 | 500.77  | -4.76  |
| O54297 RS4_SALTY 30S ribosomal protein S4   | 2  |                 | VVNIASYQVSPNDVVSIR               | 128 | 18 | 15 | 112.63 | b3b6*b6b8b13b15y3y4y5y9y11y12y13y14y18                 | 1960.05 | 72.845  | 79451  | 2 | 980.53  | 2.37   |
| O54297 RS4_SALTY 30S ribosomal protein S4   | 3  |                 | LSDYGVQLR                        | 47  | 9  | 4  | 25.47  | b3b5y2y5                                               | 1050.55 | 51.597  | 46774  | 2 | 525.78  | -5.11  |
| O54297 RS4_SALTY 30S ribosomal protein S4   | 4  |                 | LDNVVYR                          | 97  | 7  | 5  | 17.74  | b6*b6y2y6y7                                            | 878.47  | 30.675  | 11880  | 2 | 439.74  | 1.25   |
| O54297 RS4_SALTY 30S ribosomal protein S4   | 5  |                 | IEQAPGQHGAR                      | 33  | 11 | 5  | 31.78  | b4b5y2y6y10                                            | 1163.58 | 106.961 | 2116   | 1 | 1163.58 | -7.97  |
| O54297 RS4_SALTY 30S ribosomal protein S4   | 6  |                 | EKPTWLEVDAGKMEGTYK               | 165 | 18 | 5  | 43.21  | b5b6b7y4y5                                             | 2082.02 | 66.216  | 11399  | 3 | 694.68  | -1.76  |

|                                            |    |                       |                                         |     |    |    |        |                                                                                       |         |         |        |   |         |        |
|--------------------------------------------|----|-----------------------|-----------------------------------------|-----|----|----|--------|---------------------------------------------------------------------------------------|---------|---------|--------|---|---------|--------|
| O54297 RS4_SALTY 30S ribosomal protein S4  | 7  | Carbamidomethyl+C(1)  | CKIEQAPGQHGAR                           | 31  | 13 | 4  | 16.52  | b5b10y5*y5                                                                            | 1451.73 | 38.048  | 1527   | 3 | 484.58  | 11.69  |
| O54297 RS4_SALTY 30S ribosomal protein S4  | 8  | Carbamidomethyl+C(6)  | AIDTKCK                                 | 26  | 7  | 4  | 46.26  | b3b4y5y6                                                                              | 835.42  | 29.018  | 1505   | 2 | 418.22  | -12.42 |
| O54297 RS4_SALTY 30S ribosomal protein S4  | 9  |                       | ALELAEQR                                | 157 | 8  | 2  | 7.74   | b3*b3                                                                                 | 929.51  | 43.954  | 7020   | 2 | 465.26  | 4.14   |
| Q7CR87 SURA_SALTY Chaperone surA           | 1  |                       | IQELPGIFAQALSTAK                        | 235 | 16 | 14 | 49.61  | b2*b2b3*b3b4*b4b15y1y2y4*y4y12y13y14                                                  | 1686.94 | 90.647  | 42518  | 2 | 843.97  | -0.65  |
| Q7CR87 SURA_SALTY Chaperone surA           | 2  |                       | ITVLPQEVDALAK                           | 149 | 13 | 9  | 21.29  | b2b3*b3y1y2y9*y9y10y13                                                                | 1396.80 | 71.329  | 36489  | 2 | 698.90  | -3.76  |
| Q7CR87 SURA_SALTY Chaperone surA           | 3  |                       | ITDEQLDQAIAIAK                          | 90  | 15 | 4  | 22.55  | b2b3b4b13                                                                             | 1642.87 | 81.106  | 33685  | 2 | 821.94  | 1.04   |
| Q7CR87 SURA_SALTY Chaperone surA           | 4  |                       | LNAGQAGQQLPDDATLR                       | 50  | 17 | 13 | 98.74  | b4b8b9y4y6y7*y7y8y9y10y11y12*y12                                                      | 1767.90 | 51.336  | 27578  | 2 | 884.45  | 2.35   |
| Q7CR87 SURA_SALTY Chaperone surA           | 5  |                       | QIGTQNDASTELNLSHILIALPENP<br>TSEQVNDAQR | 162 | 35 | 5  | 17.44  | y5y9y14*y14y35                                                                        | 3816.90 | 89.331  | 19293  | 3 | 1272.97 | 0.45   |
| Q7CR87 SURA_SALTY Chaperone surA           | 6  |                       | VAAVVNNGVVLESDDVDGLMQSV<br>K            | 27  | 23 | 5  | 31.78  | b3y8y12y13y14                                                                         | 2343.23 | 91.656  | 15530  | 2 | 1172.12 | 1.46   |
| Q7CR87 SURA_SALTY Chaperone surA           | 7  |                       | LAYDGLNYSTYR                            | 117 | 12 | 10 | 49.35  | b2b4b5b6b10*b10y2y3y8*y8                                                              | 1435.70 | 49.628  | 11530  | 2 | 718.36  | 12.50  |
| Q7CR87 SURA_SALTY Chaperone surA           | 8  |                       | LAITYSADQQALK                           | 214 | 13 | 4  | 24.01  | y2y5y8y9                                                                              | 1421.76 | 54.952  | 6063   | 2 | 711.39  | 0.34   |
| Q7CR87 SURA_SALTY Chaperone surA           | 9  |                       | HILLKPSPIMNDQQAR                        | 288 | 16 | 6  | 13.71  | b2b11*b11y5y10*y10                                                                    | 1861.03 | 53.509  | 4901   | 2 | 931.02  | 9.05   |
| Q7CR87 SURA_SALTY Chaperone surA           | 10 |                       | LEEIAADIK                               | 306 | 9  | 8  | 64     | b4b5*b5b6b7*b7b8y7                                                                    | 1001.53 | 46.788  | 4407   | 2 | 501.27  | -20.42 |
| Q7CR87 SURA_SALTY Chaperone surA           | 11 |                       | LIMDQIILQMGQK                           | 73  | 13 | 4  | 16.52  | b4*b4b7y12                                                                            | 1530.83 | 78.159  | 4052   | 2 | 765.92  | -8.61  |
| Q7CR87 SURA_SALTY Chaperone surA           | 12 |                       | GQSQISVTEVHAR                           | 274 | 14 | 10 | 66.12  | b4*b4b6b9*b9b10y5y6y10y11                                                             | 1498.77 | 37.241  | 3256   | 3 | 500.26  | 6.19   |
| Q7CR87 SURA_SALTY Chaperone surA           | 13 |                       | EYSQDPGSANQGGLGWATPDIF<br>DPAFR         | 326 | 28 | 7  | 36.06  | y3y4y5*y5y8y11*y11                                                                    | 3011.34 | 94.367  | 3099   | 2 | 1506.17 | -1.95  |
| Q7CR87 SURA_SALTY Chaperone surA           | 14 |                       | TDAAQK                                  | 388 | 6  | 1  | 11.88  | y3                                                                                    | 633.33  | 118.837 | 2150   | 1 | 633.33  | 12.72  |
| Q7CR87 SURA_SALTY Chaperone surA           | 15 |                       | QAESIVEEARNGADFGK                       | 197 | 17 | 11 | 46.64  | b4b13y4*y4y6y9y10*y10*y10y11*y11                                                      | 1820.88 | 60.586  | 4976   | 2 | 910.94  | 1.81   |
| Q7CR87 SURA_SALTY Chaperone surA           | 16 |                       | AYRMLMNR                                | 396 | 8  | 4  | 42.12  | b4b5b7y3                                                                              | 1054.52 | 48.835  | 4393   | 3 | 352.18  | -8.10  |
| Q7CR87 SURA_SALTY Chaperone surA           | 17 |                       | LNAGQAGQQLPDDATLRHQILER                 | 50  | 23 | 4  | 24.96  | b7b8b11b15                                                                            | 2544.33 | 89.704  | 4369   | 3 | 848.78  | 1.63   |
| Q7CR87 SURA_SALTY Chaperone surA           | 18 |                       | SRLAYDGLNYSTYR                          | 115 | 14 | 7  | 48.84  | b4b5b7b8b10y4*y4                                                                      | 1678.80 | 45.471  | 3306   | 2 | 839.90  | -10.83 |
| Q7CR87 SURA_SALTY Chaperone surA           | 19 | Oxidation+M(19)       | VAAVVNNGVVLESDDVDGLMQSV<br>K            | 27  | 23 | 3  | 11.17  | b3b16y8                                                                               | 2359.21 | 115.737 | 5519   | 3 | 787.07  | -3.52  |
| Q8ZP65 TPX_SALTY Probable thiol peroxidase | 1  |                       | SQTVHFQGNPVTVANVIPQAGSK                 | 1   | 23 | 30 | 157.26 | b2*b2*b2b3b5b7*b7b9b10b11*b11b12*b12b13*b13*b13b16y4y6*y6y7*y7y8y9y10y11y12*y12y17y23 | 2379.22 | 65.115  | 193917 | 3 | 793.75  | -7.08  |
| Q8ZP65 TPX_SALTY Probable thiol peroxidase | 2  | Carbamidomethyl+C(2)  | FCGAEGLSNVITLSTLR                       | 93  | 17 | 9  | 46.93  | b2b3b7b12y4y5y6y15y17                                                                 | 1837.95 | 86.832  | 96406  | 2 | 919.48  | 1.46   |
| Q8ZP65 TPX_SALTY Probable thiol peroxidase | 3  | Carbamidomethyl+C(13) | VLNIFPSIDTVGCAASVR                      | 48  | 18 | 11 | 53.74  | b2b3b5y2y3y7y9y10y13y14y18                                                            | 1919.02 | 85.925  | 88014  | 2 | 960.01  | 6.36   |
| Q8ZP65 TPX_SALTY Probable thiol peroxidase | 4  |                       | AQAFTLVAK                               | 24  | 9  | 9  | 50.53  | b2*b2y2y3y4y6y7y9*y9                                                                  | 948.54  | 53.629  | 47741  | 2 | 474.77  | -11.45 |
| Q8ZP65 TPX_SALTY Probable thiol peroxidase | 5  |                       | NYGVEIVDGPLK                            | 116 | 12 | 11 | 48.89  | b1*b1b2b3*b3b10b11y4y8y10y12                                                          | 1303.68 | 65.452  | 28531  | 2 | 652.34  | -7.49  |
| Q8ZP65 TPX_SALTY Probable thiol peroxidase | 6  | Carbamidomethyl+C(15) | FNQLATEVENTVVLCVSADLPFA<br>QSR          | 67  | 26 | 3  | 21.6   | b7b9b10                                                                               | 2908.45 | 110.539 | 5974   | 3 | 970.15  | -0.50  |

|                                                                 |    |                                          |                                      |     |    |    |        |                                                                   |         |         |        |   |         |        |
|-----------------------------------------------------------------|----|------------------------------------------|--------------------------------------|-----|----|----|--------|-------------------------------------------------------------------|---------|---------|--------|---|---------|--------|
| Q8ZP65 TPX_SALTY Probable thiol peroxidase                      | 7  |                                          | NNEFLK                               | 110 | 6  | 1  | 11.88  | b5                                                                | 764.39  | 37.127  | 6126   | 1 | 764.39  | -2.40  |
| Q8ZP65 TPX_SALTY Probable thiol peroxidase                      | 8  |                                          | AVIVLDENDNVIFSQVLVDEITHEPDYDAALNVLKA | 133 | 35 | 23 | 127.73 | b3b4b5b10b11*b11b13*b13y3y4y5y6y7y12y13°y13*y13y14y16y18y24y30y31 | 3882.97 | 120.889 | 163477 | 3 | 1294.99 | 0.75   |
| Q8ZP65 TPX_SALTY Probable thiol peroxidase                      | 9  | Carbamidomethyl+C(13);Phosphoryl STY(10) | VLNIFPSIDTGVCASVRK                   | 48  | 19 | 3  | 12.16  | b8y11_HPO3 y11y14                                                 | 2127.07 | 48.880  | 39924  | 3 | 709.70  | 6.66   |
| Q8ZP65 TPX_SALTY Probable thiol peroxidase                      | 10 | Phosphoryl STY(10)                       | DLSDVSLSQYAGKR                       | 33  | 14 | 5  | 38.89  | b3°b3b4b8b9                                                       | 1618.73 | 42.418  | 4430   | 3 | 540.25  | -5.88  |
| Q8ZP65 TPX_SALTY Probable thiol peroxidase                      | 11 | Carbamidomethyl+C(15)                    | FNQLATEVENTVVL CVSADLPFAQSR          | 67  | 26 | 0  | 13.19  |                                                                   | 2891.46 | 110.573 | 7693   | 3 | 964.49  | 14.69  |
| Q9ZF60 GLTI_SALTY Glutamate/aartate periplasmic-binding protein | 1  |                                          | VVGYSQDYSNAIVEAVKK                   | 61  | 18 | 12 | 77.38  | b2y1y2y3y4y6y7y8y12y14y16y18                                      | 1970.00 | 63.971  | 133482 | 3 | 657.34  | -10.97 |
| Q9ZF60 GLTI_SALTY Glutamate/aartate periplasmic-binding protein | 2  |                                          | ESSVPFSYYDNQKK                       | 47  | 14 | 8  | 43.92  | b3°b3b11y5y6y7y10y14                                              | 1691.76 | 55.916  | 125881 | 2 | 846.38  | 0.94   |
| Q9ZF60 GLTI_SALTY Glutamate/aartate periplasmic-binding protein | 3  |                                          | VVGYSQDYSNAIVEAVK                    | 61  | 17 | 17 | 102.51 | b2b3b4b8b13b14°b14y3y4y5y11y12*y12y13°y13y15y17                   | 1841.94 | 68.545  | 102800 | 2 | 921.47  | 7.16   |
| Q9ZF60 GLTI_SALTY Glutamate/aartate periplasmic-binding protein | 4  |                                          | AVAFMMDDALLAGER                      | 198 | 15 | 8  | 61.02  | b3b5b10y3y4y8y11y13                                               | 1609.78 | 85.224  | 78140  | 2 | 805.39  | 4.55   |
| Q9ZF60 GLTI_SALTY Glutamate/aartate periplasmic-binding protein | 5  | Carbamidomethyl+C(13)                    | IPLLQNGTFDFECGSTTNNLER               | 98  | 22 | 9  | 27.39  | b3b13y1y2y3y5y7y10y22                                             | 2526.20 | 82.347  | 18991  | 3 | 842.74  | 1.84   |
| Q9ZF60 GLTI_SALTY Glutamate/aartate periplasmic-binding protein | 6  |                                          | QAAFSDTIFVVGTR                       | 122 | 14 | 4  | 15.39  | b7b12*b12y13                                                      | 1511.77 | 74.136  | 15565  | 2 | 756.39  | -12.11 |
| Q9ZF60 GLTI_SALTY Glutamate/aartate periplasmic-binding protein | 7  |                                          | LMDDTIAQAQTSGEAEK                    | 247 | 17 | 12 | 59.86  | b3b11°b11*b11y9y10*y10y11°y11*y11y12y13                           | 1807.84 | 46.721  | 7898   | 2 | 904.42  | 2.03   |
| Q9ZF60 GLTI_SALTY Glutamate/aartate periplasmic-binding protein | 8  | Carbamidomethyl+C(19)                    | KPDNWEIVGK PQSQEAYGCMLR              | 217 | 22 | 5  | 24.24  | b3b4b12b14y8                                                      | 2606.24 | 76.814  | 5618   | 5 | 522.05  | -5.15  |
| Q9ZF60 GLTI_SALTY Glutamate/aartate periplasmic-binding protein | 9  |                                          | TLESGR                               | 192 | 6  | 2  | 23.13  | b4b5                                                              | 662.34  | 54.264  | 5510   | 1 | 662.34  | -8.02  |
| Q9ZF60 GLTI_SALTY Glutamate/aartate periplasmic-binding protein | 10 |                                          | LNEEQK                               | 170 | 6  | 1  | 11.88  | b5                                                                | 760.39  | 33.952  | 2464   | 1 | 760.39  | 7.55   |
| Q9ZF60 GLTI_SALTY Glutamate/aartate periplasmic-binding protein | 11 |                                          | DHGD SFTLESGR                        | 185 | 13 | 3  | 16.52  | b9b12y4                                                           | 1476.68 | 43.849  | 853201 | 3 | 492.90  | 1.24   |
| Q9ZF60 GLTI_SALTY Glutamate/aartate periplasmic-binding protein | 12 | Carbamidomethyl+C(22)                    | LIPITSQNRIPLLQNGTFDFECGSTTNNLER      | 89  | 31 | 8  | 35.38  | b3y6y9y10y13°y13y14y21                                            | 3548.78 | 87.539  | 206629 | 3 | 1183.60 | 0.34   |
| Q9ZF60 GLTI_SALTY Glutamate/aartate periplasmic-binding protein | 13 |                                          | WFDKWFK                              | 264 | 7  | 5  | 32     | b5b6°b6y5°y5                                                      | 1056.54 | 30.759  | 5657   | 2 | 528.77  | 7.63   |
| Q9ZF60 GLTI_SALTY Glutamate/aartate periplasmic-binding protein | 14 |                                          | AVAFMMDDALLAGERAK                    | 198 | 17 | 3  | 13.09  | b3b5y6                                                            | 1808.90 | 54.340  | 5347   | 3 | 603.64  | -4.25  |
| Q9ZF60 GLTI_SALTY Glutamate/aartate periplasmic-binding protein | 15 |                                          | DFPDLK GK                            | 146 | 8  | 6  | 56.38  | b3°b3b4b6b7y5                                                     | 919.48  | 24.742  | 5016   | 2 | 460.24  | -6.44  |

|                                                                 |    |                       |                                  |     |    |    |        |                                             |         |         |        |   |        |        |
|-----------------------------------------------------------------|----|-----------------------|----------------------------------|-----|----|----|--------|---------------------------------------------|---------|---------|--------|---|--------|--------|
| Q9ZF60 GLTI_SALTY Glutamate/aartate periplasmic-binding protein | 16 |                       | KLMDDTIAQAQTSGEAEK               | 246 | 18 | 3  | 12.58  | b4b14y4                                     | 1935.93 | 82.988  | 4729   | 2 | 968.47 | -1.58  |
| Q9ZF60 GLTI_SALTY Glutamate/aartate periplasmic-binding protein | 17 |                       | LNEEQKMGMR                       | 170 | 10 | 3  | 36.89  | b5b7b9                                      | 1235.58 | 65.951  | 2876   | 2 | 618.30 | -2.07  |
| Q9ZF60 GLTI_SALTY Glutamate/aartate periplasmic-binding protein | 18 | Oxidation+M(5)        | LTTAMLVMGLSAGLAHAEDGAP AAGSTLDDK | 5   | 30 | 5  | 25.67  | b5b6y10y12y15                               | 2885.41 | 110.547 | 7695   | 3 | 962.47 | -10.83 |
| P0A9Y9 CC_SALTY Cold shock-like protein cC                      | 1  |                       | GFGFITPADGSK                     | 15  | 12 | 18 | 121.17 | b2b3b4b5y2°y2y3°y3y4y5y6°y6y7°y7y8y9y10y12  | 1196.59 | 64.983  | 435371 | 2 | 598.80 | -7.45  |
| P0A9Y9 CC_SALTY Cold shock-like protein cC                      | 2  |                       | DVVFVHFSAIQNGGFK                 | 27  | 15 | 13 | 79.48  | b7°b7b8°b8b9y1y5y7y9*y9y11y13y15            | 1665.82 | 74.242  | 29332  | 3 | 555.94 | -12.16 |
| P0A9Y9 CC_SALTY Cold shock-like protein cC                      | 3  |                       | TLAEGQNVEFEIQDGQK                | 42  | 17 | 8  | 17.73  | b6*b6b8y2*y2y8y10*y10                       | 1905.94 | 70.030  | 2499   | 2 | 953.48 | 13.13  |
| P0A9Y9 CC_SALTY Cold shock-like protein cC                      | 4  |                       | GPAAVNVTAI                       | 59  | 10 | 6  | 48.14  | b3b6*b6b7b9*b9                              | 912.51  | 60.518  | 9674   | 1 | 912.51 | -7.76  |
| P0A9Y9 CC_SALTY Cold shock-like protein cC                      | 5  |                       | GFGFITPADGSKDVFVHFSAIQGN GFK     | 15  | 27 | 3  | 10.92  | b25y9y11                                    | 2843.39 | 66.095  | 5263   | 3 | 948.47 | -9.19  |
| P0A9Y9 CC_SALTY Cold shock-like protein cC                      | 6  |                       | GQVKWFNESH                       | 5   | 10 | 10 | 58.09  | b4b5*b5b8°b8*b8y4y5*y5y6                    | 1222.61 | 32.027  | 2795   | 3 | 408.21 | -12.68 |
| P0A9Y9 CC_SALTY Cold shock-like protein cC                      | 7  |                       | ITPADGSK                         | 19  | 8  | 0  | 4.4    |                                             | 788.43  | 65.043  | 4399   | 1 | 788.43 | 14.63  |
| P0A9Y9 CC_SALTY Cold shock-like protein cC                      | 8  |                       | GFITPADGSK                       | 17  | 10 | 0  | 4.4    |                                             | 992.50  | 65.053  | 1574   | 1 | 992.50 | -5.90  |
| P02936 OMPA_SALTY Outer membrane protein A                      | 1  | Carbamidomethyl+C(13) | GMGESNPVTGNTCDNVKPR              | 302 | 19 | 11 | 47.3   | b11y2y5y6y10y11°y11*y11y13y17y19            | 2032.91 | 38.292  | 99166  | 3 | 678.31 | -4.74  |
| P02936 OMPA_SALTY Outer membrane protein A                      | 2  |                       | GVKDVVTQPQA                      | 339 | 11 | 10 | 44.46  | b6b7b8°b8b10°b10y1y4*y4y11                  | 1141.61 | 38.051  | 32506  | 2 | 571.31 | -8.02  |
| P02936 OMPA_SALTY Outer membrane protein A                      | 3  |                       | STLKPEGQQALDQLYSQLSNLDP K        | 231 | 24 | 8  | 15.82  | b14y1y2y9°y9y12y14*y14                      | 2673.40 | 90.651  | 32031  | 3 | 891.80 | 8.77   |
| P02936 OMPA_SALTY Outer membrane protein A                      | 4  | Carbamidomethyl+C(6)  | AALIDCLAPDR                      | 321 | 11 | 13 | 105.49 | b2b3b7°b7b8y3y4y5°y5y6y7y8y9                | 1214.62 | 62.602  | 17342  | 2 | 607.81 | -1.11  |
| P02936 OMPA_SALTY Outer membrane protein A                      | 5  |                       | IGSDAYNQGLSEKR                   | 267 | 14 | 5  | 15.39  | b2b5°b5y3y6                                 | 1537.75 | 35.149  | 14495  | 3 | 513.26 | -6.27  |
| P02936 OMPA_SALTY Outer membrane protein A                      | 6  |                       | LGGMVWR                          | 117 | 7  | 7  | 35.01  | b2b3b5b7y2y5y7                              | 818.43  | 38.026  | 11136  | 2 | 409.72 | -7.53  |
| P02936 OMPA_SALTY Outer membrane protein A                      | 7  |                       | FGQQEAAPVVAPAPAPEVQTK            | 194 | 23 | 8  | 26.12  | b5b10y6y9°y9y10y12y23                       | 2303.18 | 54.252  | 8828   | 3 | 768.40 | -9.33  |
| P02936 OMPA_SALTY Outer membrane protein A                      | 8  |                       | LGYPITDDLVDYTR                   | 103 | 14 | 7  | 37.59  | b2b11°b11y7y9y10y11                         | 1640.81 | 76.765  | 7764   | 2 | 820.91 | -2.98  |
| P02936 OMPA_SALTY Outer membrane protein A                      | 9  |                       | AQSVVDYLISK                      | 281 | 11 | 4  | 30.2   | b7y6y7y9                                    | 1222.66 | 72.907  | 23682  | 2 | 611.84 | -2.90  |
| P02936 OMPA_SALTY Outer membrane protein A                      | 10 |                       | DGSVVVLGFTDR                     | 255 | 12 | 6  | 41.41  | b11y3°y3y6y7y10                             | 1264.63 | 55.042  | 7000   | 3 | 422.21 | -20.27 |
| P02936 OMPA_SALTY Outer membrane protein A                      | 11 |                       | GDNINGAYK                        | 85  | 9  | 8  | 65.25  | b4°b4b7°b7y4y6y7y8                          | 951.47  | 49.659  | 4044   | 2 | 476.24 | 19.50  |
| P02936 OMPA_SALTY Outer membrane protein A                      | 12 |                       | IGSDAYNQGLSEK                    | 267 | 13 | 15 | 62.02  | b8°b8b9b10°b10*b10b11°b11y6°y6*y6y8*y8y9*y9 | 1381.65 | 42.462  | 3612   | 3 | 461.22 | -4.42  |
| P02936 OMPA_SALTY Outer membrane protein A                      | 13 |                       | SDVLFNFNK                        | 222 | 9  | 4  | 25.47  | b3°b3b6y7                                   | 1083.54 | 31.988  | 3492   | 2 | 542.27 | -9.80  |
| P02936 OMPA_SALTY Outer membrane protein A                      | 14 |                       | GIPSDK                           | 292 | 6  | 1  | 11.88  | b3                                          | 616.32  | 46.868  | 3244   | 1 | 616.32 | -10.79 |
| P02936 OMPA_SALTY Outer membrane protein A                      | 15 |                       | SNVPGGPSTK                       | 128 | 10 | 4  | 41.15  | b3b6b9y7                                    | 943.50  | 74.895  | 1759   | 2 | 472.25 | 17.79  |
| P02936 OMPA_SALTY Outer membrane protein A                      | 16 | Carbamidomethyl+C(6)  | AALIDCLAPDRR                     | 321 | 12 | 6  | 42.87  | b3b7b11y5°y5y6                              | 1370.70 | 56.850  | 13511  | 3 | 457.57 | -13.27 |

|                                                    |    |                                          |                                            |     |    |    |       |                                                 |         |         |        |   |         |        |
|----------------------------------------------------|----|------------------------------------------|--------------------------------------------|-----|----|----|-------|-------------------------------------------------|---------|---------|--------|---|---------|--------|
| [P02936]OMPA_SALTY Outer membrane protein A        | 17 |                                          | LGGMVWRADTK                                | 117 | 11 | 3  | 31.5  | y6y8y10                                         | 1233.62 | 38.101  | 3423   | 2 | 617.32  | -14.25 |
| [P02936]OMPA_SALTY Outer membrane protein A        | 18 |                                          | GDNINGAYKAQGVQLTAK                         | 85  | 18 | 6  | 21.5  | b9°b9*b9b12°b12b13                              | 1847.95 | 63.214  | 2610   | 3 | 616.65  | -6.01  |
| [P02936]OMPA_SALTY Outer membrane protein A        | 19 |                                          | HFTLKSDVLFNFNK                             | 217 | 14 | 5  | 15.39 | b4b7y9°y9*y9                                    | 1709.88 | 95.377  | 2459   | 2 | 855.44  | -11.14 |
| [P02936]OMPA_SALTY Outer membrane protein A        | 20 | Carbamidomethyl+C(13)<br>;Oxidation+M(2) | GMGESNPVTGNTCDNVKPR                        | 302 | 19 | 3  | 12.16 | b17y9y13                                        | 2048.89 | 74.201  | 9977   | 3 | 683.63  | -13.35 |
| [P02936]OMPA_SALTY Outer membrane protein A        | 21 |                                          | DAYNQGLSEKR                                | 270 | 11 | 0  | 5.65  |                                                 | 1280.64 | 35.095  | 7376   | 2 | 640.82  | 14.58  |
| [P02936]OMPA_SALTY Outer membrane protein A        | 22 |                                          | PAPAPAEVQTK                                | 205 | 12 | 3  | 12.47 | b6b11*b11                                       | 1205.64 | 54.285  | 6107   | 2 | 603.32  | -13.26 |
| [P66541]RS2_SALTY 30S ribosomal protein S2         | 1  |                                          | TVPMFNEALAELENK                            | 45  | 14 | 7  | 23.96 | b2b3°y4y9y12°y12y14                             | 1576.81 | 85.284  | 143045 | 2 | 788.91  | 3.25   |
| [P66541]RS2_SALTY 30S ribosomal protein S2         | 2  |                                          | EANNLGIPVFAIVDTNSDPDGVDF<br>VIPGNDDAIR     | 174 | 34 | 16 | 36.76 | b5°b5*b5b7°b7*b7b26y3y<br>4y7y8°y8y11y16*y16y34 | 3569.75 | 104.971 | 33504  | 3 | 1190.59 | 2.26   |
| [P66541]RS2_SALTY 30S ribosomal protein S2         | 3  | Carbamidomethyl+C(6)                     | EAANSCDQFFVNHR                             | 81  | 14 | 10 | 50.61 | b4y3*y3y4*y4y5*y5y7*y7<br>y8                    | 1694.72 | 47.892  | 28670  | 3 | 565.58  | -10.52 |
| [P66541]RS2_SALTY 30S ribosomal protein S2         | 4  |                                          | AGVHFGHQTR                                 | 11  | 10 | 14 | 85.37 | b1b3b5b6b7b8*b8y2y4°y4<br>y7y8*y8y10            | 1109.55 | 46.732  | 22871  | 2 | 555.28  | -8.36  |
| [P66541]RS2_SALTY 30S ribosomal protein S2         | 5  |                                          | ATVSMRDLK                                  | 1   | 10 | 5  | 29.11 | b4°b4b8b9y10                                    | 1151.60 | 39.538  | 12980  | 2 | 576.30  | 5.09   |
| [P66541]RS2_SALTY 30S ribosomal protein S2         | 6  |                                          | LKDLETQSQDGTFEK                            | 113 | 15 | 8  | 23.8  | b10y4°y4y9*y9y10*y10y15                         | 1738.87 | 39.680  | 8773   | 2 | 869.94  | 9.34   |
| [P66541]RS2_SALTY 30S ribosomal protein S2         | 7  |                                          | MATVSMR                                    | 0   | 7  | 5  | 49.27 | b4b5b7y3y6                                      | 795.39  | 59.780  | 6603   | 1 | 795.39  | 2.76   |
| [P66541]RS2_SALTY 30S ribosomal protein S2         | 8  |                                          | SQDLASQAEESFVEAE                           | 225 | 16 | 3  | 13.71 | b8b10y9                                         | 1739.77 | 73.552  | 4829   | 2 | 870.39  | 7.72   |
| [P66541]RS2_SALTY 30S ribosomal protein S2         | 9  |                                          | DLETQSQDGTFEK                              | 115 | 13 | 5  | 28.35 | b3b4y4y10*y10                                   | 1497.69 | 134.775 | 1659   | 2 | 749.35  | 14.02  |
| [P66541]RS2_SALTY 30S ribosomal protein S2         | 10 |                                          | DMGGLPDALFVIDADHEHIAIK                     | 152 | 22 | 4  | 22.85 | b6b9y7y8                                        | 2377.14 | 99.640  | 124603 | 2 | 1189.07 | -18.79 |
| [P66541]RS2_SALTY 30S ribosomal protein S2         | 11 |                                          | ILFVGTK                                    | 66  | 7  | 3  | 35.01 | y3y5y6                                          | 777.48  | 57.726  | 20395  | 2 | 389.24  | -14.76 |
| [P66541]RS2_SALTY 30S ribosomal protein S2         | 12 |                                          | RAASEAVK                                   | 73  | 8  | 8  | 58.14 | b4°b4b5b6°b6y5y7°y7                             | 831.46  | 31.467  | 15356  | 2 | 416.23  | -8.74  |
| [P66541]RS2_SALTY 30S ribosomal protein S2         | 13 |                                          | AGVHFGHQTRYWNPK                            | 11  | 15 | 3  | 20.49 | b10y11y12                                       | 1797.90 | 100.658 | 9784   | 2 | 899.45  | 3.26   |
| [P66541]RS2_SALTY 30S ribosomal protein S2         | 14 |                                          | LKDLETQSQDGTFEK                            | 113 | 15 | 11 | 69.55 | b4b10°b10b11°b11b13y4y<br>6y7y9y10              | 1738.85 | 60.633  | 9485   | 3 | 580.29  | -0.07  |
| [P66541]RS2_SALTY 30S ribosomal protein S2         | 15 |                                          | TVPMFNEALAELENKISAR                        | 45  | 18 | 7  | 21.5  | b5b10°b10°b10b11°b11*b<br>11                    | 2004.03 | 45.988  | 1717   | 2 | 1002.52 | -12.91 |
| [P66541]RS2_SALTY 30S ribosomal protein S2         | 16 |                                          | YWNPKMKPFIFGAR                             | 21  | 14 | 3  | 23.96 | b6b8b12                                         | 1754.91 | 71.310  | 1564   | 2 | 877.96  | -5.70  |
| [P66541]RS2_SALTY 30S ribosomal protein S2         | 17 | Oxidation+M(2)                           | DMGGLPDALFVIDADHEHIAIK                     | 152 | 22 | 4  | 22.85 | b13b15y10y11                                    | 2393.16 | 83.324  | 2697   | 2 | 1197.08 | -9.90  |
| [P66541]RS2_SALTY 30S ribosomal protein S2         | 18 | Oxidation+M(1)                           | MATVSMRDLK                                 | 0   | 11 | 5  | 30.2  | b4°b4b8b9y9                                     | 1298.63 | 46.792  | 2303   | 3 | 433.55  | -0.09  |
| [P66541]RS2_SALTY 30S ribosomal protein S2         | 19 |                                          | AGVHFGHQQT                                 | 11  | 9  | 2  | 17.86 | y5y7                                            | 953.47  | 46.784  | 2450   | 2 | 477.24  | 10.88  |
| [P17215]LIVJ_SALTY Leu/Ile/Val/Thr-binding protein | 1  |                                          | TQFMGPEGVANVSLNAGESAE<br>GLLVTKPK          | 240 | 31 | 17 | 75.8  | b2°b2*b2b3b4b5°b5b6b15<br>y4y6y8y19y27y28y29y31 | 3144.63 | 89.061  | 104862 | 3 | 1048.88 | 1.24   |
| [P17215]LIVJ_SALTY Leu/Ile/Val/Thr-binding protein | 2  | Carbamidomethyl+C(7)                     | YVIGHLCSSSTQPASDIYEDEGILM<br>ITPAATAPELTAR | 92  | 38 | 13 | 75.9  | b12b23b25b26b27y6y9y10<br>y11y12y13y15y38       | 4077.98 | 90.128  | 81267  | 3 | 1360.00 | -0.42  |

|                                                   |    |                       |                                        |     |    |    |       |                                      |         |         |        |   |         |        |
|---------------------------------------------------|----|-----------------------|----------------------------------------|-----|----|----|-------|--------------------------------------|---------|---------|--------|---|---------|--------|
| P17215 LIVJ_SALTY Leu/Ile/Val/Thr-binding protein | 3  |                       | TTGLDSDQGPTAAK                         | 137 | 14 | 10 | 94.36 | b4y5y6y7y8y9y10y11y12y14             | 1361.65 | 29.890  | 80116  | 2 | 681.33  | -1.88  |
| P17215 LIVJ_SALTY Leu/Ile/Val/Thr-binding protein | 4  |                       | VAVVGAMSGPV AQYGDQEFTGA EQAIADINAK     | 25  | 32 | 15 | 78.59 | b2b3b4b14b15b26y1y3*y3y4y5*y5y6y7y32 | 3207.56 | 90.559  | 67881  | 3 | 1069.86 | -0.84  |
| P17215 LIVJ_SALTY Leu/Ile/Val/Thr-binding protein | 5  |                       | QQYGEGLAR                              | 168 | 9  | 7  | 38.49 | b3b9y2y4y6y7y9                       | 1021.50 | 33.603  | 38310  | 2 | 511.25  | -5.38  |
| P17215 LIVJ_SALTY Leu/Ile/Val/Thr-binding protein | 6  |                       | ENIDFVYYGGYHPMGQILR                    | 212 | 20 | 4  | 20.73 | b7y7y12y13                           | 2401.13 | 81.303  | 23584  | 3 | 801.05  | 2.54   |
| P17215 LIVJ_SALTY Leu/Ile/Val/Thr-binding protein | 7  |                       | GGVNVVFFDGITAGEK                       | 185 | 16 | 5  | 28.06 | b9b15y3y4y10                         | 1609.82 | 110.196 | 7948   | 2 | 805.41  | -1.97  |
| P17215 LIVJ_SALTY Leu/Ile/Val/Thr-binding protein | 8  |                       | QDPSGAFVWTTYAALQSLQAGLN HSDDPAEIAK     | 290 | 33 | 7  | 17.19 | b2y1y2y8y14°y14y24                   | 3501.71 | 109.834 | 6439   | 3 | 1167.91 | 4.46   |
| P17215 LIVJ_SALTY Leu/Ile/Val/Thr-binding protein | 9  | Carbamidomethyl+C(6)  | TLLAGCIALSLSHMAFADDIK                  | 4   | 21 | 4  | 14.63 | b9b14y6y14                           | 2247.14 | 69.920  | 163625 | 3 | 749.72  | -3.04  |
| P17215 LIVJ_SALTY Leu/Ile/Val/Thr-binding protein | 10 |                       | GATVDTVMGPLSWDEK                       | 326 | 16 | 10 | 35.93 | b3°b3b5°b5b9°b9y3°y3y5y12            | 1705.84 | 62.624  | 22078  | 2 | 853.42  | 15.39  |
| P17215 LIVJ_SALTY Leu/Ile/Val/Thr-binding protein | 11 |                       | LVLRTTGLDSDQGPTAAK                     | 133 | 18 | 8  | 21.61 | b14°b14y10°y10y12°y12*y12y13         | 1842.99 | 95.479  | 28037  | 2 | 922.00  | 0.93   |
| P17215 LIVJ_SALTY Leu/Ile/Val/Thr-binding protein | 12 |                       | VAVVGAMSGPV AQYGDQEFTGA EQAIADINAKGGIK | 25  | 36 | 4  | 24.55 | b3b7b8b13                            | 3562.74 | 123.719 | 20284  | 4 | 891.44  | -13.09 |
| P17215 LIVJ_SALTY Leu/Ile/Val/Thr-binding protein | 13 |                       | KQDPSGAFVWTTYAALQSLQAGLN HSDDPAEIAK    | 289 | 34 | 6  | 22.59 | b4b10b14y8y9y12                      | 3629.75 | 100.325 | 11797  | 3 | 1210.59 | -8.88  |
| P17215 LIVJ_SALTY Leu/Ile/Val/Thr-binding protein | 14 |                       | IAIHDKQQYGEGLAR                        | 161 | 16 | 7  | 42.95 | y4y6y7°y7y10y11°y11                  | 1811.99 | 48.724  | 5003   | 2 | 906.50  | 6.06   |
| P17215 LIVJ_SALTY Leu/Ile/Val/Thr-binding protein | 15 |                       | YLKGATVDTVMGPLSWDEK                    | 323 | 19 | 3  | 21.34 | y5y6y16                              | 2110.06 | 66.244  | 2960   | 3 | 704.03  | 4.98   |
| P17215 LIVJ_SALTY Leu/Ile/Val/Thr-binding protein | 16 |                       | GDLKGFEFGVFDWHANGTATDAK                | 342 | 23 | 7  | 22.42 | b8b12°b12y9y10*y10y13                | 2483.16 | 92.705  | 2443   | 2 | 1242.08 | -1.08  |
| P17215 LIVJ_SALTY Leu/Ile/Val/Thr-binding protein | 17 | Oxidation+M(16)       | KENIDFVYYGGYHPMGQILR                   | 211 | 21 | 4  | 11.55 | b4b7y8*y8                            | 2545.25 | 38.032  | 1792   | 3 | 849.09  | 14.48  |
| P17215 LIVJ_SALTY Leu/Ile/Val/Thr-binding protein | 18 |                       | QQYGEGLAR                              | 168 | 9  | 0  | 2.51  |                                      | 1003.49 | 33.664  | 5220   | 2 | 502.25  | 3.35   |
| P66170 RL29_SALTY 50S ribosomal protein L29       | 1  |                       | SVEELNTELLNLLR                         | 9   | 14 | 12 | 63.11 | b1b4b5°b5b6b12y3y4*y4y9y11y14        | 1642.90 | 102.063 | 161437 | 2 | 821.96  | 2.01   |
| P66170 RL29_SALTY 50S ribosomal protein L29       | 2  |                       | SVEELNTELLNLLREQFNLR                   | 9   | 20 | 4  | 26.23 | b4b10b11b13                          | 2430.28 | 113.716 | 7092   | 3 | 810.77  | -6.03  |
| P66170 RL29_SALTY 50S ribosomal protein L29       | 3  |                       | EQFNLR                                 | 23  | 6  | 3  | 23.13 | y3*y3y4                              | 806.41  | 42.706  | 80862  | 2 | 403.71  | -9.46  |
| P66170 RL29_SALTY 50S ribosomal protein L29       | 4  |                       | TLLTEK                                 | 54  | 6  | 1  | 11.88 | y4                                   | 704.41  | 33.021  | 5822   | 1 | 704.41  | -12.74 |
| O33921 AGP_SALTY Glucose-1-phohatase              | 1  |                       | MGTMDPTFNPNVITDDSAAFR                  | 141 | 20 | 10 | 56.66 | b3y2y4y6y8y9y12y13y15y20             | 2186.01 | 79.115  | 40500  | 2 | 1093.51 | 7.59   |
| O33921 AGP_SALTY Glucose-1-phohatase              | 2  |                       | IEYVYQSAR                              | 358 | 9  | 7  | 64    | b6y3y5y6y7y8y9                       | 1128.57 | 43.275  | 29640  | 2 | 564.79  | -2.92  |
| O33921 AGP_SALTY Glucose-1-phohatase              | 3  | Carbamidomethyl+C(14) | EWLVAQGLIPSGECPAPDTVYAY ANSLQR         | 87  | 29 | 10 | 20.78 | b3°b3b15y2y5y7*y7y9y20y29            | 3205.58 | 94.522  | 24111  | 3 | 1069.20 | 5.33   |
| O33921 AGP_SALTY Glucose-1-phohatase              | 4  |                       | DTFSANYQQEPGVQGPLK                     | 208 | 18 | 5  | 12.58 | b13°b13y8y13y18                      | 1978.96 | 56.965  | 14767  | 2 | 989.98  | 5.61   |
| O33921 AGP_SALTY Glucose-1-phohatase              | 5  |                       | APLANNGSVLAQSTPNAWPAWD VPGGQLTTK       | 43  | 31 | 12 | 21.81 | b6b7°b7b9°b9b14°b14y1y8y11°y13y31    | 3161.59 | 84.149  | 12692  | 3 | 1054.54 | -3.32  |
| O33921 AGP_SALTY Glucose-1-phohatase              | 6  |                       | SQLHLDSEYK                             | 172 | 10 | 8  | 29.11 | b1b2°b2y2y4°y4y5y7                   | 1219.59 | 22.291  | 5521   | 3 | 407.20  | -4.50  |
| O33921 AGP_SALTY Glucose-1-phohatase              | 7  |                       | NGYQDSLFTSPTVAR                        | 266 | 15 | 8  | 43.96 | b1b8°b8b9b10°b10y6y7                 | 1655.82 | 42.432  | 4894   | 3 | 552.61  | 9.07   |
| O33921 AGP_SALTY Glucose-1-phohatase              | 8  | Carbamidomethyl+C(14) | LLEQITHYQDSPSCKEK                      | 182 | 17 | 6  | 31.71 | b2b10°b10b11y6y7                     | 2076.00 | 48.765  | 4068   | 3 | 692.67  | -1.65  |
| O33921 AGP_SALTY Glucose-1-phohatase              | 9  | Carbamidomethyl+C(14) | LLEQITHYQDSPSCK                        | 182 | 15 | 5  | 13.22 | b9°b9b11°b11y2                       | 1818.86 | 59.740  | 2182   | 2 | 909.93  | -4.70  |

|                                      |    |                                                |                                    |     |    |    |       |                                         |         |        |       |   |         |        |
|--------------------------------------|----|------------------------------------------------|------------------------------------|-----|----|----|-------|-----------------------------------------|---------|--------|-------|---|---------|--------|
| O33921 AGP_SALTY Glucose-1-phohatase | 10 |                                                | VLVADR                             | 293 | 6  | 3  | 23.13 | y3y4°y4                                 | 672.39  | 46.073 | 54178 | 1 | 672.39  | -13.43 |
| O33921 AGP_SALTY Glucose-1-phohatase | 11 |                                                | TPIGGQLVFQR                        | 335 | 11 | 4  | 19.74 | b7y3*y3y8                               | 1215.66 | 64.154 | 10014 | 2 | 608.33  | -21.79 |
| O33921 AGP_SALTY Glucose-1-phohatase | 12 |                                                | VGNSLVDAFTLQYYEGFPMQVA<br>WGGIHTDR | 226 | 31 | 3  | 11.16 | b3y7y9                                  | 3486.70 | 84.562 | 4060  | 3 | 1162.91 | 17.02  |
| O33921 AGP_SALTY Glucose-1-phohatase | 13 |                                                | GGVLEVYMGHYTR                      | 74  | 13 | 3  | 16.52 | b4b8y11                                 | 1481.70 | 73.545 | 2390  | 2 | 741.35  | -14.01 |
| O33921 AGP_SALTY Glucose-1-phohatase | 14 |                                                | QQAQVAMEK                          | 161 | 9  | 6  | 50.99 | b3b4*b4b6y4y7                           | 1032.53 | 19.337 | 1890  | 3 | 344.85  | 13.00  |
| O33921 AGP_SALTY Glucose-1-phohatase | 15 | Carbamidomethyl+C(8);<br>Carbamidomethyl+C(16) | VTLELKGPCVDANGFCPLDK               | 383 | 20 | 7  | 37.27 | b12b13*b13y6y7y9y14                     | 2233.09 | 68.970 | 65746 | 3 | 745.03  | -6.12  |
| O33921 AGP_SALTY Glucose-1-phohatase | 16 | Carbamidomethyl+C(2);<br>Carbamidomethyl+C(10) | GCPVDANGFCPLDKFDNMNTA<br>AK        | 389 | 24 | 6  | 39.43 | y3y6y7y12y14y22                         | 2641.20 | 79.193 | 45323 | 3 | 881.07  | 5.55   |
| O33921 AGP_SALTY Glucose-1-phohatase | 17 |                                                | IEYVYQSARQLR                       | 358 | 12 | 4  | 21.92 | b6*b6b7y4                               | 1525.83 | 45.969 | 29389 | 3 | 509.28  | 11.04  |
| O33921 AGP_SALTY Glucose-1-phohatase | 18 |                                                | QQAQVAMEKAR                        | 161 | 11 | 5  | 31.78 | b7*b7b8y7y9                             | 1259.64 | 49.644 | 13010 | 3 | 420.55  | -13.86 |
| O33921 AGP_SALTY Glucose-1-phohatase | 19 | Carbamidomethyl+C(5)                           | EKHQCSLIDAK                        | 197 | 11 | 6  | 44    | b4b8y4y7°y7y10                          | 1328.65 | 50.301 | 3291  | 2 | 664.83  | -7.81  |
| O33921 AGP_SALTY Glucose-1-phohatase | 20 | Carbamidomethyl+C(24)                          | SQLHLDSEYKLEQITHYQDSPSC<br>K       | 172 | 25 | 8  | 21.63 | b4b6*b6b7°b7y3°y3y12                    | 3019.47 | 94.398 | 2281  | 4 | 755.62  | 8.00   |
| O33921 AGP_SALTY Glucose-1-phohatase | 21 | Phosphoryl STY(6)                              | NAEALTLK                           | 370 | 8  | 6  | 30.87 | b5_H3PO4<br>b5*b5b7_H3PO4<br>b7°b7y3°y3 | 939.44  | 42.430 | 3990  | 2 | 470.22  | -6.76  |
| O33921 AGP_SALTY Glucose-1-phohatase | 22 |                                                | LLEQITHYQDSP                       | 182 | 12 | 2  | 13.22 | y9y11                                   | 1443.70 | 59.781 | 13217 | 2 | 722.36  | -4.74  |
| O33921 AGP_SALTY Glucose-1-phohatase | 23 |                                                | NYQQEPGVQGPLK                      | 213 | 13 | 0  | 8.16  |                                         | 1457.73 | 56.956 | 7930  | 2 | 729.37  | -6.87  |
| O33921 AGP_SALTY Glucose-1-phohatase | 24 |                                                | APLANNGSVLAQSTPNAWPAWD<br>VP       | 43  | 24 | 2  | 13.43 | y5°y5                                   | 2476.20 | 84.097 | 1616  | 2 | 1238.60 | -10.06 |
| O33921 AGP_SALTY Glucose-1-phohatase | 25 |                                                | SQLHLDSEY                          | 172 | 9  | 0  | 3.14  |                                         | 1091.51 | 22.327 | 1503  | 2 | 546.26  | 7.38   |
| P0A1V4 KAD_SALTY Adenylate kinase    | 1  |                                                | LVEYHQMTAPLIGYYQK                  | 167 | 17 | 9  | 34.43 | b2b8°b8y2y3y5y6y7y17                    | 2054.02 | 70.058 | 42948 | 3 | 685.35  | -8.08  |
| P0A1V4 KAD_SALTY Adenylate kinase    | 2  |                                                | VDGTQAVADV R                       | 195 | 11 | 6  | 19.74 | b4b11y2y4y9y11                          | 1130.57 | 37.106 | 42622 | 2 | 565.79  | -7.45  |
| P0A1V4 KAD_SALTY Adenylate kinase    | 3  |                                                | IILLGAPGAGK                        | 2   | 11 | 7  | 58.26 | b2b3y2y3y5y7y9                          | 1009.63 | 61.666 | 35238 | 2 | 505.32  | -9.07  |
| P0A1V4 KAD_SALTY Adenylate kinase    | 4  |                                                | YGIPQISTGDMLR                      | 23  | 13 | 9  | 80.77 | b2y3y4y5y6y7y8y10y13                    | 1450.73 | 73.388 | 25529 | 2 | 725.87  | -2.10  |
| P0A1V4 KAD_SALTY Adenylate kinase    | 5  |                                                | GTQAQFIMEK                         | 13  | 10 | 10 | 66.67 | b5°b9y3°y3y5y7y8*y8y9y1<br>0            | 1152.59 | 49.560 | 15466 | 2 | 576.80  | 13.34  |
| P0A1V4 KAD_SALTY Adenylate kinase    | 6  |                                                | NGFLLDGFPR                         | 78  | 10 | 6  | 43.83 | b4b5b8y6y9°y9                           | 1135.57 | 54.259 | 3725  | 2 | 568.29  | -21.28 |
| P0A1V4 KAD_SALTY Adenylate kinase    | 7  | Carbamidomethyl+C(6)                           | IAQEDCRNGFLLDGFPR                  | 71  | 17 | 4  | 20.5  | y6y10°y10y12                            | 2007.98 | 89.533 | 34747 | 2 | 1004.49 | 4.32   |
| P0A1V4 KAD_SALTY Adenylate kinase    | 8  |                                                | DDVTGEDLTTRK                       | 145 | 12 | 6  | 29.86 | b4°b4b11y7y8°y8                         | 1349.67 | 46.004 | 17813 | 3 | 450.56  | 11.22  |
| P0A1V4 KAD_SALTY Adenylate kinase    | 9  |                                                | IILLGAPGAGKGTQAQFIMEK              | 2   | 21 | 3  | 11.55 | b3y3y19                                 | 2143.18 | 73.441 | 15625 | 3 | 715.06  | -7.52  |
| P0A1V4 KAD_SALTY Adenylate kinase    | 10 |                                                | YAKVDGTQAVADV R                    | 192 | 14 | 3  | 15.39 | b10y8y11                                | 1492.76 | 69.024 | 4597  | 2 | 746.88  | -12.43 |
| P0A1V4 KAD_SALTY Adenylate kinase    | 11 |                                                | LVEYHQMTAPLIGYYQKEAEGN<br>TK       | 167 | 25 | 6  | 10.97 | b9y5°y5*y5y11°y11                       | 2854.40 | 54.348 | 3278  | 6 | 476.57  | -1.28  |
| P0A1V4 KAD_SALTY Adenylate kinase    | 12 |                                                | YGIPQISTGDMLRAAVK                  | 23  | 17 | 5  | 13.09 | b8b10°b10*b10y3                         | 1819.95 | 42.472 | 1676  | 2 | 910.48  | -11.67 |



|                                           |    |                                             |                               |     |    |    |        |                                                           |         |         |        |   |         |        |
|-------------------------------------------|----|---------------------------------------------|-------------------------------|-----|----|----|--------|-----------------------------------------------------------|---------|---------|--------|---|---------|--------|
| P0A1V4 KAD_SALTY Adenylate kinase         | 13 |                                             | GTQAQFIM                      | 13  | 8  | 4  | 29.11  | y3y6*y6y7                                                 | 895.44  | 49.585  | 3519   | 2 | 448.23  | 10.29  |
| Q8ZKP7 TPIS_SALTY Triosephohate isomerase | 1  |                                             | SATPAQAQAVHK                  | 176 | 12 | 18 | 93.89  | b2b3°b3b11b12y1y2y3y4y5*y5y6*y6y7*y7y8y9y12               | 1208.63 | 19.310  | 59727  | 2 | 604.82  | -7.98  |
| Q8ZKP7 TPIS_SALTY Triosephohate isomerase | 2  | Carbamidomethyl+C(8)                        | ELTGVAGCDVAIAPPEMYIDLAKR      | 28  | 24 | 7  | 22.8   | b6y4y8y11°y11y18y24                                       | 2589.30 | 83.499  | 49721  | 3 | 863.77  | -1.04  |
| Q8ZKP7 TPIS_SALTY Triosephohate isomerase | 3  |                                             | TQGAAAFEGAVIAYEPVWAIGTGK      | 152 | 24 | 18 | 37.49  | b1°b1b2°b2°b2b4b7°b7b11°b11b12b13°b13y1y2y7y12y24         | 2407.24 | 94.408  | 27602  | 2 | 1204.12 | 4.06   |
| Q8ZKP7 TPIS_SALTY Triosephohate isomerase | 4  | Carbamidomethyl+C(14)                       | FAVLKEQGLTPVLCIGETEAENEA GK   | 112 | 26 | 5  | 21.6   | y2y3y6y7*y7                                               | 2803.41 | 136.440 | 4112   | 2 | 1402.21 | -4.01  |
| Q8ZKP7 TPIS_SALTY Triosephohate isomerase | 5  |                                             | DIGAQYIIHGSERR                | 84  | 15 | 3  | 22.55  | b4b11b12                                                  | 1727.91 | 79.585  | 2591   | 2 | 864.46  | -3.67  |
| Q8ZKP7 TPIS_SALTY Triosephohate isomerase | 6  | Carbamidomethyl+C(8)                        | ELTGVAGCDVAIAPPEMYIDLAK       | 28  | 23 | 5  | 19.95  | b4°b4b6b7y8                                               | 2433.23 | 98.555  | 2016   | 3 | 811.75  | 11.74  |
| Q8ZKP7 TPIS_SALTY Triosephohate isomerase | 7  | Carbamidomethyl+C(9)                        | EQGLTPVLCIGETEAENEAGK         | 117 | 21 | 5  | 11.55  | b14y2y3y12°y12                                            | 2245.09 | 70.078  | 1704   | 3 | 749.04  | 11.64  |
| Q8ZKP7 TPIS_SALTY Triosephohate isomerase | 8  |                                             | LNGSR                         | 11  | 5  | 2  | 11.25  | y4°y4                                                     | 546.30  | 32.016  | 4374   | 1 | 546.30  | -5.92  |
| Q8ZKP7 TPIS_SALTY Triosephohate isomerase | 9  |                                             | DIGAQYIIHGSER                 | 84  | 14 | 4  | 23.17  | y4y5°y5y10                                                | 1571.82 | 68.962  | 1684   | 2 | 786.41  | 1.55   |
| Q8ZKP7 TPIS_SALTY Triosephohate isomerase | 10 | Carbamidomethyl+C(9); Carbamidomethyl+C(26) | EQGLTPVLCIGETEAENEAGKTEEV CAR | 117 | 28 | 20 | 128.06 | b5°b5b13y3y4y5°y5y7y10°y10y12y13y14y18y20y21y23*y23y24y26 | 3090.43 | 72.966  | 180080 | 3 | 1030.81 | -2.45  |
| Q8ZKP7 TPIS_SALTY Triosephohate isomerase | 11 |                                             | HMVNELVANLRK                  | 16  | 12 | 3  | 28.15  | b4b6b8                                                    | 1423.77 | 62.679  | 12188  | 3 | 475.26  | -13.03 |
| Q8ZKP7 TPIS_SALTY Triosephohate isomerase | 12 | Carbamidomethyl+C(14)                       | FAVLKEQGLTPVLCIGETEAENEA GK   | 112 | 26 | 3  | 34.15  | y4y5y6                                                    | 2803.39 | 115.935 | 8805   | 3 | 935.13  | -10.45 |
| Q8ZKP7 TPIS_SALTY Triosephohate isomerase | 13 | Carbamidomethyl+C(8)                        | ELTGVAGCDVAIAPPEMYIDLAKR      | 28  | 24 | 6  | 23.15  | b4b5°b5b8b11y3                                            | 2589.32 | 91.497  | 7208   | 3 | 863.78  | 4.05   |
| Q8ZKP7 TPIS_SALTY Triosephohate isomerase | 14 |                                             | TYHKESDELIAK                  | 99  | 12 | 5  | 27.94  | b6y3y6°y6y7                                               | 1433.72 | 45.974  | 7098   | 2 | 717.36  | -5.19  |
| Q8ZKP7 TPIS_SALTY Triosephohate isomerase | 15 |                                             | RHPLVMGNWK                    | 1   | 10 | 3  | 29.11  | y4y5y7                                                    | 1237.65 | 34.534  | 3525   | 2 | 619.33  | -7.10  |
| Q8ZKP7 TPIS_SALTY Triosephohate isomerase | 16 |                                             | TPAQAQAVHK                    | 178 | 10 | 5  | 31.16  | b6°b6b7b8*b8                                              | 1050.56 | 19.312  | 24935  | 2 | 525.78  | -8.37  |
| Q8ZKP7 TPIS_SALTY Triosephohate isomerase | 17 |                                             | PAQAQAVHK                     | 179 | 9  | 8  | 52.87  | b3*b3b4b6*b6b7*b7b8                                       | 949.51  | 19.316  | 24844  | 2 | 475.26  | -13.95 |
| Q8ZQT5 TOLB_SALTY Protein tolB            | 1  |                                             | SNNTEPTWFPDSQTLAFTSDQAGRPQVYK | 287 | 29 | 9  | 14.4   | b1b2*b2b5°b5y14y20y24y29                                  | 3285.56 | 78.328  | 65764  | 3 | 1095.86 | 4.09   |
| Q8ZQT5 TOLB_SALTY Protein tolB            | 2  |                                             | WAGPGAAPEDIGGIVAADLR          | 43  | 20 | 15 | 64.49  | b2b5b7b10b13°b13b14b15y1y2y5y6y9y13y20                    | 1936.00 | 86.259  | 55750  | 2 | 968.51  | 6.43   |
| Q8ZQT5 TOLB_SALTY Protein tolB            | 3  |                                             | IEITQGVDSARPIGVVPFK           | 24  | 19 | 9  | 24.92  | b2b9b11y1y2y3y15y16y19                                    | 2026.11 | 71.229  | 51126  | 3 | 676.04  | -10.72 |
| Q8ZQT5 TOLB_SALTY Protein tolB            | 4  |                                             | LPATDGQVK                     | 413 | 9  | 10 | 76.5   | b5b8y3y5y6y7°y7y8*y8y9                                    | 928.50  | 28.349  | 42324  | 2 | 464.76  | -6.18  |
| Q8ZQT5 TOLB_SALTY Protein tolB            | 5  |                                             | SALVIQTLANGAVR                | 223 | 14 | 6  | 44.43  | b3b4y2y9y10y11                                            | 1412.82 | 71.518  | 26906  | 2 | 706.91  | -4.23  |
| Q8ZQT5 TOLB_SALTY Protein tolB            | 6  |                                             | MNINGGAAQR                    | 316 | 10 | 5  | 32.12  | y5y6y7*y7y10                                              | 1031.50 | 28.453  | 16838  | 2 | 516.25  | -5.44  |
| Q8ZQT5 TOLB_SALTY Protein tolB            | 7  |                                             | HNGAPAFSPDGTK                 | 244 | 13 | 7  | 46.3   | b2b3b4b5b11y6y8                                           | 1298.60 | 63.238  | 12973  | 3 | 433.54  | -7.33  |
| Q8ZQT5 TOLB_SALTY Protein tolB            | 8  |                                             | FMVMVSSNNGQQHIAK              | 344 | 16 | 4  | 13.71  | b9y2y11y14                                                | 1790.87 | 77.243  | 2360   | 3 | 597.63  | 3.95   |
| Q8ZQT5 TOLB_SALTY Protein tolB            | 9  |                                             | IAYVVQTNNGGQFPYELR            | 166 | 17 | 3  | 20.08  | b4y4y5                                                    | 1955.02 | 110.850 | 1667   | 3 | 652.34  | 7.24   |

|                                     |    |                       |                               |     |    |    |        |                                                                       |         |         |        |   |         |        |
|-------------------------------------|----|-----------------------|-------------------------------|-----|----|----|--------|-----------------------------------------------------------------------|---------|---------|--------|---|---------|--------|
| Q8ZQT5 TOLB_SALTY Protein tolB      | 10 |                       | VSDYDGYNQFVVHR                | 183 | 14 | 5  | 20.83  | b9y9y10°y10*y10                                                       | 1698.76 | 54.634  | 67216  | 3 | 566.93  | -15.16 |
| Q8ZQT5 TOLB_SALTY Protein tolB      | 11 |                       | QVASFPR                       | 237 | 7  | 3  | 35.01  | y3y4y5                                                                | 804.42  | 39.122  | 19420  | 2 | 402.72  | -14.26 |
| Q8ZQT5 TOLB_SALTY Protein tolB      | 12 |                       | YAGHTASDEVFEK                 | 142 | 13 | 3  | 25.77  | b4b8b10                                                               | 1453.68 | 66.908  | 13246  | 3 | 485.23  | 13.02  |
| Q8ZQT5 TOLB_SALTY Protein tolB      | 13 |                       | QWLRYAGHTASDEVFEK             | 138 | 17 | 5  | 20.08  | b10*b10y6y7°y7                                                        | 2036.99 | 95.488  | 23139  | 2 | 1019.00 | 5.69   |
| Q8ZQT5 TOLB_SALTY Protein tolB      | 14 |                       | ARLPATDGQVK                   | 411 | 11 | 5  | 39.23  | b5b7b8y5y8                                                            | 1155.64 | 30.208  | 12877  | 2 | 578.32  | -8.03  |
| Q8ZQT5 TOLB_SALTY Protein tolB      | 15 |                       | NSGKFNPDDR                    | 63  | 10 | 3  | 22.12  | b6b9y6                                                                | 1147.57 | 46.736  | 3843   | 2 | 574.29  | -14.89 |
| Q8ZQT5 TOLB_SALTY Protein tolB      | 16 |                       | TGSLNLYVMDLASGQIRQITDGR       | 264 | 23 | 4  | 11.17  | b4°b4b6y3                                                             | 2508.31 | 74.806  | 3762   | 2 | 1254.66 | 8.37   |
| Q8ZQT5 TOLB_SALTY Protein tolB      | 17 | Phosphoryl STY(13)    | TGSLNLYVMDLASGQIR             | 264 | 17 | 3  | 20.08  | b11b12y7                                                              | 1917.90 | 89.261  | 5923   | 3 | 639.97  | -3.69  |
| P0A1D3 CH60_SALTY 60 kDa chaperonin | 1  |                       | GYLSPYFINKPETGAVELESPFILLADKK | 197 | 29 | 10 | 29.28  | b2b3b4°b4b16y2y4y26y27y29                                             | 3239.71 | 96.754  | 199253 | 4 | 810.68  | -4.60  |
| P0A1D3 CH60_SALTY 60 kDa chaperonin | 2  |                       | ANDAAGDGTTTATVLAQSIITEGLK     | 80  | 25 | 27 | 162.32 | b2*b2b3*b3b4*b4b5b6°b6b13b14b15b18°b18y1y3y4°y4y5y6y7y8y9y10y11y13y25 | 2418.23 | 92.692  | 148971 | 3 | 806.75  | -2.32  |
| P0A1D3 CH60_SALTY 60 kDa chaperonin | 3  |                       | QQIEEATSDYDREK                | 350 | 14 | 6  | 32.87  | y3y5y7y8y14*y14                                                       | 1711.75 | 34.130  | 84587  | 3 | 571.26  | -14.33 |
| P0A1D3 CH60_SALTY 60 kDa chaperonin | 4  |                       | AVAAAVEELK                    | 122 | 10 | 10 | 63.66  | b2b3y3°y3y5°y5y6y7y8y10                                               | 1000.56 | 47.935  | 72155  | 2 | 500.78  | -9.03  |
| P0A1D3 CH60_SALTY 60 kDa chaperonin | 5  | Carbamidomethyl+C(6)  | QIVLNCGEEPSVVANTVK            | 452 | 18 | 10 | 63.7   | b18y5y6y9y12*y12y13y14y15y18                                          | 1957.02 | 62.228  | 71518  | 2 | 979.01  | 6.74   |
| P0A1D3 CH60_SALTY 60 kDa chaperonin | 6  |                       | EMLPVLEAVAK                   | 231 | 11 | 8  | 44.46  | b2°b2b3y4y6y7y8y11                                                    | 1199.66 | 80.660  | 71032  | 2 | 600.34  | -6.11  |
| P0A1D3 CH60_SALTY 60 kDa chaperonin | 7  | Carbamidomethyl+C(6)  | ALSVPCSDSK                    | 132 | 10 | 11 | 63.66  | b2b3°b3y2y4y5y6°y6y7y9y10                                             | 1063.50 | 35.773  | 70125  | 2 | 532.25  | -7.35  |
| P0A1D3 CH60_SALTY 60 kDa chaperonin | 8  |                       | VVINKDTTTIIDGVGEEAAIQGR       | 322 | 23 | 7  | 43.66  | b2b3y4y7y8y9y10                                                       | 2399.28 | 68.424  | 59484  | 3 | 800.43  | -1.02  |
| P0A1D3 CH60_SALTY 60 kDa chaperonin | 9  |                       | SFGAPTITK                     | 42  | 9  | 10 | 37.97  | b2b3°b3b7°b7y1y2y5°y5y7                                               | 921.49  | 45.514  | 58700  | 2 | 461.25  | -14.11 |
| P0A1D3 CH60_SALTY 60 kDa chaperonin | 10 |                       | AIAQVGTISANSDETVGK            | 142 | 18 | 20 | 90.43  | b1b2b3b4°b4b7b11b15y1y2y8y9y10y12*y12y13°y13y14*y14y18                | 1760.91 | 48.868  | 50406  | 2 | 880.96  | 4.16   |
| P0A1D3 CH60_SALTY 60 kDa chaperonin | 11 |                       | VEDALHATR                     | 395 | 9  | 6  | 38.49  | b2b8y4y6y7y9                                                          | 1011.51 | 27.072  | 46284  | 2 | 506.26  | -9.65  |
| P0A1D3 CH60_SALTY 60 kDa chaperonin | 12 |                       | GGDGYNGYNAATEEYGNMIDMGILDPTK  | 470 | 28 | 6  | 21.96  | b2y1y3y4y10y28                                                        | 2966.30 | 88.959  | 30375  | 3 | 989.44  | 5.10   |
| P0A1D3 CH60_SALTY 60 kDa chaperonin | 13 |                       | AVAAGMNPMDLKR                 | 105 | 13 | 12 | 80.77  | b1y2y3y6°y6y7°y7y8y9y10y11y13                                         | 1373.70 | 51.578  | 25939  | 2 | 687.35  | -1.78  |
| P0A1D3 CH60_SALTY 60 kDa chaperonin | 14 |                       | LIAEAMDK                      | 160 | 8  | 6  | 49.9   | y2y3y4y6y7y8                                                          | 890.45  | 39.794  | 24759  | 2 | 445.73  | -13.23 |
| P0A1D3 CH60_SALTY 60 kDa chaperonin | 15 |                       | AGKPLLIHAEDVEGEALATLVVNTMR    | 242 | 26 | 10 | 41.75  | b3b6b7y1y4y5y6°y6y8*y8                                                | 2723.49 | 136.286 | 13412  | 3 | 908.50  | -4.30  |
| P0A1D3 CH60_SALTY 60 kDa chaperonin | 16 |                       | APGFGDR                       | 277 | 7  | 7  | 35.01  | b2b5y2y4°y4y6y7                                                       | 719.34  | 28.316  | 9378   | 2 | 360.17  | -7.98  |
| P0A1D3 CH60_SALTY 60 kDa chaperonin | 17 |                       | DTTTIIDGVGEEAAIQGR            | 327 | 18 | 3  | 12.58  | b5b11y12                                                              | 1845.93 | 55.879  | 7170   | 3 | 615.98  | 3.84   |
| P0A1D3 CH60_SALTY 60 kDa chaperonin | 18 | Carbamidomethyl+C(18) | SALQYAASVAGLMITTECMVTDLPK     | 501 | 25 | 11 | 26.09  | b1b5°b5b8°b8b22y1y7°y7y8y11                                           | 2670.32 | 136.414 | 5079   | 3 | 890.78  | -1.01  |
| P0A1D3 CH60_SALTY 60 kDa chaperonin | 19 |                       | ATLEDLGQAK                    | 311 | 10 | 9  | 29.11  | b10*b10y5°y5y6y9°y9*y9y10                                             | 1045.55 | 45.997  | 4549   | 2 | 523.28  | -0.23  |
| P0A1D3 CH60_SALTY 60 kDa chaperonin | 20 |                       | GVNVLADAVK                    | 18  | 10 | 6  | 49.4   | b8°b8y4y5y6y8                                                         | 985.55  | 56.683  | 110167 | 2 | 493.28  | -15.73 |

|                                      |    |                                           |                                         |     |    |    |       |                                  |         |         |        |   |         |        |
|--------------------------------------|----|-------------------------------------------|-----------------------------------------|-----|----|----|-------|----------------------------------|---------|---------|--------|---|---------|--------|
| IP0A1D3 CH60_SALTY 60 kDa chaperonin | 21 |                                           | LAGGVAVIK                               | 371 | 9  | 4  | 38.49 | b5b6b7y7                         | 827.52  | 45.666  | 70102  | 2 | 414.26  | -19.62 |
| IP0A1D3 CH60_SALTY 60 kDa chaperonin | 22 |                                           | NVVLDK                                  | 36  | 6  | 2  | 26.14 | b3b5                             | 687.40  | 44.572  | 24915  | 1 | 687.40  | -6.04  |
| IP0A1D3 CH60_SALTY 60 kDa chaperonin | 23 |                                           | EIELEDK                                 | 58  | 7  | 7  | 54.5  | b3°b3y3y4°y4y5y6                 | 875.43  | 42.481  | 5900   | 2 | 438.22  | -5.93  |
| IP0A1D3 CH60_SALTY 60 kDa chaperonin | 24 |                                           | AVAAGMNPMDLK                            | 105 | 12 | 5  | 41.41 | b11y4y5y8y10                     | 1217.62 | 64.175  | 5298   | 2 | 609.32  | 18.45  |
| IP0A1D3 CH60_SALTY 60 kDa chaperonin | 25 |                                           | FGNDAR                                  | 7   | 6  | 4  | 34.38 | b3y3y4°y4                        | 679.31  | 41.594  | 5097   | 1 | 679.31  | -3.23  |
| IP0A1D3 CH60_SALTY 60 kDa chaperonin | 26 |                                           | VVINK                                   | 322 | 5  | 1  | 11.25 | y3                               | 572.37  | 31.380  | 4817   | 1 | 572.37  | -5.33  |
| IP0A1D3 CH60_SALTY 60 kDa chaperonin | 27 |                                           | SDAPDLGAAGGMGGMGGMGGM<br>M              | 526 | 22 | 5  | 25.3  | b3b8b9°b9b19                     | 1927.77 | 81.219  | 3533   | 2 | 964.39  | 12.22  |
| IP0A1D3 CH60_SALTY 60 kDa chaperonin | 28 |                                           | FENMGAQMVK                              | 65  | 10 | 4  | 32.12 | y7y8*y8y9                        | 1154.56 | 118.842 | 3162   | 1 | 1154.56 | 20.83  |
| IP0A1D3 CH60_SALTY 60 kDa chaperonin | 29 |                                           | QQIEEATSDYDR                            | 350 | 12 | 10 | 53.33 | b4°b4*b4b7°b7b8b11y10y11°y11     | 1454.67 | 136.445 | 2662   | 1 | 1454.67 | 19.39  |
| IP0A1D3 CH60_SALTY 60 kDa chaperonin | 30 |                                           | GYLSPYFINKPETGAVELESPFILL<br>ADK        | 197 | 28 | 4  | 10.94 | b5b8°b8y22                       | 3111.65 | 99.085  | 2618   | 4 | 778.67  | 7.69   |
| IP0A1D3 CH60_SALTY 60 kDa chaperonin | 31 |                                           | VGAATEVEMK                              | 380 | 10 | 8  | 62.86 | b6°b6b8y3y5y6y9°y9               | 1034.52 | 35.877  | 2117   | 1 | 1034.52 | -2.48  |
| IP0A1D3 CH60_SALTY 60 kDa chaperonin | 32 |                                           | VTLGPK                                  | 28  | 6  | 3  | 23.13 | b4°b4y4                          | 614.38  | 28.922  | 1782   | 1 | 614.38  | -9.34  |
| IP0A1D3 CH60_SALTY 60 kDa chaperonin | 33 |                                           | IADLKGQNEQNVGIK                         | 425 | 16 | 12 | 70.05 | b3b4b9*b9y3y4y8y9y11°y11*y11y14  | 1741.89 | 40.699  | 137603 | 3 | 581.30  | -11.00 |
| IP0A1D3 CH60_SALTY 60 kDa chaperonin | 34 |                                           | EIELEDKFENMGAQMVK                       | 58  | 17 | 11 | 33.62 | b5b8°b8y6y7°y7y10°y10*y10y13°y13 | 2010.94 | 74.199  | 80661  | 3 | 670.99  | -4.25  |
| IP0A1D3 CH60_SALTY 60 kDa chaperonin | 35 |                                           | AMLQDIATLTGGTVISEEIGMELE<br>KATLEDLGQAK | 286 | 35 | 7  | 16.04 | b7b13b15y7*y7y9y21               | 3675.86 | 123.197 | 42137  | 3 | 1225.96 | -2.26  |
| IP0A1D3 CH60_SALTY 60 kDa chaperonin | 36 |                                           | VGKEGVITVEDGTGLQDELDDVVE<br>GMQFDR      | 168 | 29 | 7  | 18.83 | b6b11b15y6y11°y11y17             | 3135.50 | 74.153  | 13186  | 4 | 784.63  | -3.82  |
| IP0A1D3 CH60_SALTY 60 kDa chaperonin | 37 |                                           | AIAQVGTISANSDETGVGLIAEAM<br>DK          | 142 | 26 | 4  | 19.63 | b3y4y5y20                        | 2632.35 | 92.487  | 12949  | 3 | 878.12  | 0.93   |
| IP0A1D3 CH60_SALTY 60 kDa chaperonin | 38 |                                           | AVAAGMNPMDLKR                           | 105 | 13 | 5  | 45.05 | b3b4b5y6y7                       | 1373.72 | 48.887  | 7619   | 2 | 687.36  | 10.31  |
| IP0A1D3 CH60_SALTY 60 kDa chaperonin | 39 |                                           | EVASKANDAAGDGTTTATVLAQS<br>IITEGLK      | 75  | 30 | 7  | 34.31 | b3b7b9b10°b10b14b17              | 2932.47 | 88.265  | 5469   | 3 | 978.16  | -14.07 |
| IP0A1D3 CH60_SALTY 60 kDa chaperonin | 40 |                                           | DGVSVAREIELEDK                          | 51  | 14 | 8  | 41.48 | b4°b4b5b9y3°y3y7y9               | 1559.78 | 49.617  | 4295   | 2 | 780.39  | -7.98  |
| IP0A1D3 CH60_SALTY 60 kDa chaperonin | 41 |                                           | DVKFGNDAR                               | 4   | 9  | 8  | 52.75 | b4b5°b5b6b8y7°y7*y7              | 1021.51 | 38.078  | 3837   | 2 | 511.26  | 0.42   |
| IP0A1D3 CH60_SALTY 60 kDa chaperonin | 42 |                                           | VGAATEVEMKEK                            | 380 | 12 | 4  | 17.94 | b8b11°b11y8                      | 1291.64 | 59.821  | 2104   | 3 | 431.22  | -13.70 |
| IP0A1D3 CH60_SALTY 60 kDa chaperonin | 43 | Phosphoryl STY(6)                         | SFGAPTITKDGVSVAR                        | 42  | 16 | 3  | 13.71 | b4b9y12_HPO3 y12                 | 1685.80 | 59.825  | 3467   | 3 | 562.60  | -10.28 |
| IP0A1D3 CH60_SALTY 60 kDa chaperonin | 44 | Phosphoryl STY(8)                         | SFGAPTITKDGVSVAIELEDK                   | 42  | 23 | 3  | 11.17 | b7b13y14                         | 2542.21 | 87.517  | 2531   | 3 | 848.07  | -10.37 |
| IP0A1D3 CH60_SALTY 60 kDa chaperonin | 45 | Oxidation+M(2)                            | EMLPVLEAVAK                             | 231 | 11 | 5  | 19.74 | b5b10°b10y5°y5                   | 1215.66 | 68.981  | 5383   | 2 | 608.33  | -7.13  |
| IP0A1D3 CH60_SALTY 60 kDa chaperonin | 46 | Oxidation+M(9)                            | VGAATEVEMKEK                            | 380 | 12 | 3  | 21.92 | b3b4y11                          | 1307.64 | 74.688  | 4403   | 3 | 436.55  | -8.31  |
| IP0A1D3 CH60_SALTY 60 kDa chaperonin | 47 | Oxidation+M(9)                            | AVAAGMNPMDLKR                           | 105 | 13 | 3  | 16.52 | b8b11y5                          | 1389.70 | 50.324  | 1707   | 2 | 695.35  | 1.93   |
| IP0A1D3 CH60_SALTY 60 kDa chaperonin | 48 | Carbamidomethyl+C(18)<br>;Oxidation+M(19) | SALQYAASVAGLMITTECMVTDL<br>PK           | 501 | 25 | 4  | 10.97 | b9°b9b15y8                       | 2686.35 | 94.332  | 1551   | 2 | 1343.68 | 13.09  |
| IP0A1D3 CH60_SALTY 60 kDa chaperonin | 49 |                                           | AAGMNPMDLKR                             | 107 | 11 | 1  | 7.24  | b3                               | 1203.59 | 51.537  | 47127  | 2 | 602.30  | -2.74  |

|                                                      |    |                       |                          |     |    |    |       |                                         |         |         |        |   |        |        |
|------------------------------------------------------|----|-----------------------|--------------------------|-----|----|----|-------|-----------------------------------------|---------|---------|--------|---|--------|--------|
| P0A1D3 CH60_SALTY 60 kDa chaperonin                  | 50 |                       | EDALHATR                 | 396 | 8  | 0  | 2.51  |                                         | 912.44  | 27.020  | 32174  | 2 | 456.73 | -11.77 |
| P0A1D3 CH60_SALTY 60 kDa chaperonin                  | 51 |                       | GMNPMDLKR                | 109 | 9  | 1  | 7.24  | b3                                      | 1061.53 | 51.588  | 6812   | 2 | 531.27 | 10.92  |
| P0A1D3 CH60_SALTY 60 kDa chaperonin                  | 52 |                       | AIAQVGTISANS             | 142 | 12 | 0  | 8.16  |                                         | 1131.60 | 48.891  | 4736   | 3 | 377.87 | 1.62   |
| P0A1D3 CH60_SALTY 60 kDa chaperonin                  | 53 |                       | TIIDGVGEEAAIQGR          | 330 | 15 | 0  | 11.3  |                                         | 1528.79 | 68.354  | 3523   | 2 | 764.90 | -4.39  |
| P0A1D3 CH60_SALTY 60 kDa chaperonin                  | 54 |                       | AIAQVGTISANSDETV         | 142 | 16 | 2  | 12.47 | y10y14                                  | 1575.78 | 48.840  | 2743   | 2 | 788.40 | -1.94  |
| P0A1D3 CH60_SALTY 60 kDa chaperonin                  | 55 | Carbamidomethyl+C(6)  | QIVLNCGEEPSVVANTVK       | 452 | 18 | 0  | 8.16  |                                         | 1938.97 | 62.232  | 15039  | 3 | 647.00 | -9.57  |
| P66313 RL6_SALTY 50S ribosomal protein L6            | 1  |                       | TLNDAVEVK                | 35  | 9  | 12 | 55.76 | b2°b2b3y1y2y3°y3y4y7y8y9*y9             | 988.52  | 39.022  | 114554 | 2 | 494.76 | -8.64  |
| P66313 RL6_SALTY 50S ribosomal protein L6            | 2  |                       | ALLNSMVIGVTEGFTK         | 69  | 16 | 3  | 22.09 | y8y9y12                                 | 1679.91 | 95.318  | 71567  | 2 | 840.46 | 0.87   |
| P66313 RL6_SALTY 50S ribosomal protein L6            | 3  |                       | DGYADGWAQAGTAR           | 55  | 14 | 10 | 50.61 | b3y4y6°y6y7°y7*y7y9y11y14               | 1438.64 | 50.364  | 69858  | 2 | 719.82 | 2.72   |
| P66313 RL6_SALTY 50S ribosomal protein L6            | 4  |                       | INGQVITIK                | 18  | 9  | 5  | 50.53 | y3y4y7y8y9                              | 985.60  | 48.939  | 51665  | 2 | 493.30 | -8.79  |
| P66313 RL6_SALTY 50S ribosomal protein L6            | 5  |                       | APVVVPAGVDVK             | 6   | 12 | 12 | 98.67 | b2b3b4b5y2y3y5y7y8y9y10y12              | 1150.68 | 53.689  | 46484  | 2 | 575.84 | -6.26  |
| P66313 RL6_SALTY 50S ribosomal protein L6            | 6  |                       | ALLNSMVIGVTEGFTKK        | 69  | 17 | 5  | 20.5  | b2b3b6b15y1                             | 1807.97 | 89.536  | 43112  | 3 | 603.33 | -14.79 |
| P66313 RL6_SALTY 50S ribosomal protein L6            | 7  |                       | HADNALTFGPR              | 44  | 11 | 12 | 49.69 | b1b2b3b5b6b11*b11y4y5y9°y9*y9           | 1198.59 | 47.779  | 39039  | 2 | 599.80 | -6.62  |
| P66313 RL6_SALTY 50S ribosomal protein L6            | 8  |                       | LQLVGVGYYR               | 86  | 9  | 6  | 33.25 | b2y2y5y6y7y9                            | 1004.58 | 60.549  | 26783  | 2 | 502.79 | -7.90  |
| P66313 RL6_SALTY 50S ribosomal protein L6            | 9  |                       | YADEVVR                  | 163 | 7  | 7  | 60.52 | b3b6°b6y4y5y6°y6                        | 851.42  | 30.675  | 6857   | 2 | 426.21 | -10.18 |
| P66313 RL6_SALTY 50S ribosomal protein L6            | 10 |                       | NGELTR                   | 29  | 6  | 3  | 23.13 | y4y5°y5                                 | 689.36  | 37.160  | 6211   | 1 | 689.36 | 4.07   |
| P66313 RL6_SALTY 50S ribosomal protein L6            | 11 |                       | GADKQVIGQVAADLR          | 134 | 15 | 10 | 46    | b3b4b5°b5*b5b9°b9*b9b12y8               | 1540.83 | 60.607  | 39332  | 3 | 514.28 | -12.28 |
| P66313 RL6_SALTY 50S ribosomal protein L6            | 12 | Oxidation+M(6)        | ALLNSMVIGVTEGFTK         | 69  | 16 | 3  | 13.71 | b8b10y7                                 | 1695.89 | 52.815  | 10242  | 2 | 848.45 | -2.16  |
| P66313 RL6_SALTY 50S ribosomal protein L6            | 13 |                       | SMVIGVTEGFTKK            | 73  | 13 | 2  | 7.99  | b5°b5                                   | 1396.77 | 89.533  | 5977   | 2 | 698.89 | 11.36  |
| P66313 RL6_SALTY 50S ribosomal protein L6            | 14 |                       | INGQVITIK                | 18  | 9  | 1  | 7.74  | b3                                      | 968.57  | 48.889  | 15638  | 2 | 484.79 | 1.39   |
| P66313 RL6_SALTY 50S ribosomal protein L6            | 15 |                       | HADNALTFGPR              | 44  | 11 | 0  | 3.77  |                                         | 1180.58 | 47.719  | 8396   | 3 | 394.20 | 0.21   |
| P22107 TRAT_SALTY TraT complement resistance protein | 1  |                       | ATVTTDNVAALR             | 177 | 12 | 15 | 72.82 | b3°b3b6b8°b8b9°b9*b9y4y8y9°y9y10*y10y12 | 1231.65 | 45.994  | 41193  | 2 | 616.33 | -8.13  |
| P22107 TRAT_SALTY TraT complement resistance protein | 2  |                       | IQTSTETGNQHK             | 196 | 12 | 10 | 68.89 | b2y2y3y5y6°y6y8°y8y9y10                 | 1343.64 | 14.869  | 16179  | 3 | 448.55 | -14.90 |
| P22107 TRAT_SALTY TraT complement resistance protein | 3  |                       | QGTSGAK                  | 189 | 7  | 3  | 32    | b4b5y3                                  | 648.33  | 59.833  | 12413  | 1 | 648.33 | -9.41  |
| P22107 TRAT_SALTY TraT complement resistance protein | 4  |                       | GYTVVTSPPDK              | 79  | 10 | 4  | 45.13 | y4y5y6y7                                | 1066.54 | 36.666  | 9395   | 2 | 533.77 | -0.92  |
| P22107 TRAT_SALTY TraT complement resistance protein | 5  | Carbamidomethyl+C(16) | LMMVTLVSSTLALSGCGAMSTAIK | 5   | 24 | 8  | 43.08 | b4b5°b5b6b8°b8y10y11                    | 2442.28 | 136.431 | 6502   | 3 | 814.76 | 11.60  |
| P22107 TRAT_SALTY TraT complement resistance protein | 6  |                       | AYYWIQANVLK              | 89  | 11 | 3  | 22.75 | b4b5y8                                  | 1368.71 | 63.997  | 1703   | 3 | 456.91 | -14.09 |
| P22107 TRAT_SALTY TraT complement resistance protein | 7  |                       | ATVTTDNVAALRQGTSGAK      | 177 | 19 | 7  | 36.96 | b3b9b10*b10b11y3y7                      | 1861.00 | 54.290  | 88033  | 3 | 621.00 | 10.69  |
| P22107 TRAT_SALTY TraT complement resistance protein | 8  |                       | YQTRVVSNAK               | 208 | 11 | 6  | 34.97 | b4y4y6°y6y10*y10                        | 1279.67 | 61.914  | 10665  | 3 | 427.23 | -2.19  |

|                                                        |    |                   |                                 |     |    |    |       |                                                  |         |         |        |   |         |        |
|--------------------------------------------------------|----|-------------------|---------------------------------|-----|----|----|-------|--------------------------------------------------|---------|---------|--------|---|---------|--------|
| P22107 TRAT_SALTY TraT complement resistance protein   | 9  |                   | IQTSTETGNQHKYQTR                | 196 | 16 | 7  | 30.5  | b3*b3b6*b6b7b11y8                                | 1891.91 | 22.269  | 3029   | 4 | 473.73  | -7.61  |
| P22107 TRAT_SALTY TraT complement resistance protein   | 10 | Phosphoryl STY(7) | DMSDLQSLIAK                     | 63  | 11 | 7  | 60.02 | y4y5°y5y6*y6y8y10                                | 1300.59 | 38.144  | 2483   | 3 | 434.20  | 10.89  |
| P22107 TRAT_SALTY TraT complement resistance protein   | 11 | Oxidation+M(7)    | NTSDKDMSDLQSLIAK                | 58  | 16 | 3  | 21.42 | b5b13b15                                         | 1781.87 | 77.193  | 41362  | 2 | 891.44  | 8.29   |
| P22107 TRAT_SALTY TraT complement resistance protein   | 12 |                   | TDNVAALR                        | 181 | 8  | 3  | 7.2   | b7°b7*b7                                         | 859.46  | 46.024  | 4848   | 2 | 430.23  | -6.04  |
| P22107 TRAT_SALTY TraT complement resistance protein   | 13 |                   | TSTETGNQHK                      | 198 | 10 | 1  | 7.2   | b5                                               | 1102.52 | 14.859  | 1505   | 2 | 551.76  | 2.99   |
| P0A2C5 RBSB_SALTY D-ribose-binding periplasmic protein | 1  |                   | ILLINPTDSDAVGNAVK               | 84  | 17 | 17 | 92.26 | b2b3b4b5y2y3y9y11*y11y12°y12y13*y13y14*y14y15y17 | 1739.96 | 71.448  | 57657  | 2 | 870.48  | 0.84   |
| P0A2C5 RBSB_SALTY D-ribose-binding periplasmic protein | 2  |                   | LAATIAQLPDQIGAK                 | 253 | 15 | 10 | 62.94 | b3b5y3y4y6°y6y7y8y10y15                          | 1509.86 | 66.945  | 30072  | 2 | 755.43  | -4.77  |
| P0A2C5 RBSB_SALTY D-ribose-binding periplasmic protein | 3  |                   | FNVLASQPADFDR                   | 178 | 13 | 7  | 27.99 | b7*b7y3°y3y6y8°y12                               | 1479.73 | 67.136  | 13144  | 2 | 740.37  | 6.68   |
| P0A2C5 RBSB_SALTY D-ribose-binding periplasmic protein | 4  |                   | IPVITLDR                        | 107 | 8  | 3  | 30.87 | b3y4y7                                           | 926.56  | 62.537  | 26458  | 2 | 463.78  | -5.80  |
| P0A2C5 RBSB_SALTY D-ribose-binding periplasmic protein | 5  |                   | GVEVADK                         | 268 | 7  | 6  | 57.51 | b3b4°b4b6y3y4                                    | 717.38  | 47.842  | 6305   | 1 | 717.38  | -0.51  |
| P0A2C5 RBSB_SALTY D-ribose-binding periplasmic protein | 6  |                   | YPVDLK                          | 285 | 6  | 4  | 34.38 | b3b4b5°b5                                        | 734.42  | 62.636  | 5846   | 1 | 734.42  | 10.31  |
| P0A2C5 RBSB_SALTY D-ribose-binding periplasmic protein | 7  |                   | GLNVMQNLLTAHPDVQAVFAQNDEMALGALR | 193 | 31 | 4  | 21.95 | b5b6*b6y9                                        | 3336.62 | 111.333 | 2858   | 3 | 1112.88 | -19.46 |
| P0A2C5 RBSB_SALTY D-ribose-binding periplasmic protein | 8  |                   | EADK                            | 50  | 4  | 1  | 10.62 | y3                                               | 462.22  | 35.340  | 2783   | 1 | 462.22  | -0.13  |
| P0A2C5 RBSB_SALTY D-ribose-binding periplasmic protein | 9  |                   | MNMK                            | 0   | 4  | 1  | 10.62 | b3                                               | 523.23  | 82.245  | 2006   | 1 | 523.23  | -11.32 |
| P0A2C5 RBSB_SALTY D-ribose-binding periplasmic protein | 10 |                   | ERGEGFQQAVALAHK                 | 164 | 14 | 4  | 23.17 | b5b7b8*b8                                        | 1527.76 | 74.166  | 16723  | 3 | 509.92  | -4.63  |
| P0A2C5 RBSB_SALTY D-ribose-binding periplasmic protein | 11 |                   | FNVLASQPADFDRTK                 | 178 | 15 | 5  | 26.18 | b10b11°b11y8y11                                  | 1708.89 | 87.543  | 12702  | 2 | 854.95  | 13.57  |
| P0A2C5 RBSB_SALTY D-ribose-binding periplasmic protein | 12 |                   | QATKGDVVSHIASDNVLGGK            | 115 | 20 | 3  | 32.03 | b15b16b17                                        | 1996.03 | 69.053  | 3419   | 3 | 666.02  | -7.28  |
| P0A2C5 RBSB_SALTY D-ribose-binding periplasmic protein | 13 |                   | ELANVQDLTVRGTK                  | 70  | 14 | 3  | 23.96 | b4b6b12                                          | 1543.83 | 89.565  | 1670   | 3 | 515.28  | -9.73  |
| P0A2C5 RBSB_SALTY D-ribose-binding periplasmic protein | 14 |                   | EADKLGYNLVVLDSQNNPAK            | 50  | 20 | 5  | 11.82 | b6y4*y4y7*y7                                     | 2188.16 | 27.751  | 1601   | 6 | 365.53  | 13.95  |
| P0A7X0 RS8_SALTY 30S ribosomal protein S8              | 1  |                   | SMQDPIADMLTR                    | 1   | 12 | 12 | 71.69 | b2b4y1y2y3y4y6°y6y8y9y10y12                      | 1377.65 | 79.028  | 171181 | 2 | 689.33  | 2.22   |
| P0A7X0 RS8_SALTY 30S ribosomal protein S8              | 2  |                   | AVVESIQR                        | 69  | 8  | 8  | 69.39 | b3b6y4y5°y5y6y7y8                                | 901.50  | 33.346  | 100296 | 2 | 451.25  | -11.44 |
| P0A7X0 RS8_SALTY 30S ribosomal protein S8              | 3  |                   | AAVTMPSSK                       | 22  | 9  | 15 | 58.77 | b1b2b9y1y2°y2y3y4°y4y5y6°y6y7°y7y9               | 891.45  | 31.917  | 88496  | 2 | 446.23  | -7.81  |
| P0A7X0 RS8_SALTY 30S ribosomal protein S8              | 4  |                   | GVMTDR                          | 108 | 6  | 2  | 23.13 | b4y5                                             | 678.32  | 32.041  | 3909   | 1 | 678.32  | -9.18  |
| P0A7X0 RS8_SALTY 30S ribosomal protein S8              | 5  |                   | NGQAANKAAVTMPSSK                | 15  | 16 | 3  | 13.71 | b9b12y6                                          | 1574.78 | 49.595  | 4082   | 3 | 525.60  | -11.01 |
| P0A7X0 RS8_SALTY 30S ribosomal protein S8              | 6  |                   | VTMPSSK                         | 24  | 7  | 0  | 2.51  |                                                  | 749.38  | 31.883  | 18955  | 1 | 749.38  | -3.10  |
| P0A7X0 RS8_SALTY 30S ribosomal protein S8              | 7  |                   | AVTMPSSK                        | 23  | 8  | 0  | 2.51  |                                                  | 820.43  | 31.923  | 6442   | 2 | 410.72  | 6.77   |
| P0A2A3 RL1_SALTY 50S ribosomal protein L1              | 1  |                   | VVGQLGQVLGPR                    | 122 | 12 | 11 | 71.69 | b2b4y1y3y4y6y7y8y10*y10y12                       | 1222.72 | 59.648  | 149719 | 2 | 611.86  | -9.48  |
| P0A2A3 RL1_SALTY 50S ribosomal protein L1              | 2  |                   | VGTVTPNVAEAVK                   | 141 | 13 | 4  | 31    | y8y9y10y13                                       | 1284.72 | 48.522  | 141037 | 2 | 642.86  | 0.19   |
| P0A2A3 RL1_SALTY 50S ribosomal protein L1              | 3  |                   | VAVFTQGPNAEAAK                  | 74  | 14 | 9  | 70.4  | b4b13y4y7y8y9*y9y10y11                           | 1402.73 | 45.838  | 90978  | 2 | 701.87  | -4.44  |

|                                                         |    |                       |                                 |     |    |    |        |                                              |         |         |        |   |         |        |
|---------------------------------------------------------|----|-----------------------|---------------------------------|-----|----|----|--------|----------------------------------------------|---------|---------|--------|---|---------|--------|
| P0A2A3 RL1_SALTY 50S ribosomal protein L1               | 4  |                       | AAGAELVGMEDLADQIK               | 88  | 17 | 7  | 33.83  | b3b4b7y10*y10y11y17                          | 1730.87 | 80.469  | 32941  | 2 | 865.94  | 4.87   |
| P0A2A3 RL1_SALTY 50S ribosomal protein L1               | 5  |                       | GATVLPHGTR                      | 60  | 11 | 6  | 30.2   | b8y4y6*y6y7y11                               | 1065.57 | 30.271  | 27373  | 2 | 533.29  | -5.04  |
| P0A2A3 RL1_SALTY 50S ribosomal protein L1               | 6  |                       | QYDINEAIALLK                    | 19  | 12 | 3  | 17.94  | b4y4y6                                       | 1390.76 | 86.041  | 46782  | 2 | 695.88  | -0.53  |
| P0A2A3 RL1_SALTY 50S ribosomal protein L1               | 7  |                       | GEMNFDVVIASPDAMR                | 106 | 16 | 4  | 13.71  | b12b14*b14y12                                | 1751.79 | 72.362  | 10973  | 3 | 584.60  | -11.71 |
| P0A2A3 RL1_SALTY 50S ribosomal protein L1               | 8  |                       | SDQNVR                          | 54  | 6  | 1  | 11.88  | b4                                           | 718.35  | 61.886  | 2973   | 1 | 718.35  | 4.67   |
| P0A2A3 RL1_SALTY 50S ribosomal protein L1               | 9  |                       | VSISTTMGAGVAVDQAGLSASAN         | 211 | 23 | 5  | 13.64  | b6b13y5*y5y9                                 | 2107.07 | 61.895  | 2359   | 2 | 1054.04 | 16.92  |
| P0A2A3 RL1_SALTY 50S ribosomal protein L1               | 10 |                       | KGEMNFDVVIASPDAMR               | 105 | 17 | 3  | 20.08  | b10b11y5                                     | 1879.92 | 70.833  | 10478  | 2 | 940.46  | 9.81   |
| P0A2A3 RL1_SALTY 50S ribosomal protein L1               | 11 |                       | KVSISTTMGAGVAVDQAGLSASAN        | 210 | 24 | 3  | 20.34  | b16y13y14                                    | 2235.13 | 87.181  | 2982   | 3 | 745.71  | -1.31  |
| P0A2A3 RL1_SALTY 50S ribosomal protein L1               | 12 |                       | VAVFTQGPNAEAAKAAGAELVGMEDLADQIK | 74  | 31 | 3  | 11.16  | b12b14y4                                     | 3114.57 | 111.794 | 2411   | 3 | 1038.86 | -2.74  |
| P0A2A3 RL1_SALTY 50S ribosomal protein L1               | 13 | Oxidation+M(9)        | AAGAELVGMEDLADQIK               | 88  | 17 | 6  | 25.6   | b3b6*b6b10y8y14                              | 1746.85 | 64.122  | 4646   | 3 | 582.96  | -4.26  |
| P0A2A3 RL1_SALTY 50S ribosomal protein L1               | 14 |                       | TVLPHGTR                        | 62  | 9  | 0  | 3.77   |                                              | 937.51  | 30.258  | 20076  | 2 | 469.26  | -12.89 |
| P02910 HISJ_SALTY Histidine-binding periplasmic protein | 1  |                       | VGVLQGTQTETFGNEHWAPK            | 135 | 20 | 18 | 110.42 | b2b3b4y2y3y4y7*y7y8y10y11*y11y12y13y15y17y20 | 2199.07 | 64.152  | 127685 | 3 | 733.70  | -5.66  |
| P02910 HISJ_SALTY Histidine-binding periplasmic protein | 2  |                       | IGTDPTYAPFESK                   | 29  | 13 | 15 | 127.03 | b4b8b11*b11y4y5y6y7y8y9y10y11*y11y12y13      | 1425.68 | 55.822  | 111090 | 2 | 713.35  | -4.02  |
| P02910 HISJ_SALTY Histidine-binding periplasmic protein | 3  |                       | NSDIQPTVASLK                    | 120 | 12 | 13 | 83.61  | b2*b2b3*b3b4y3y4y7y8*y8y9y10y12              | 1272.68 | 48.629  | 84029  | 2 | 636.84  | -1.92  |
| P02910 HISJ_SALTY Histidine-binding periplasmic protein | 4  | Carbamidomethyl+C(5)  | INTQCTFVENPLDALIPSLK            | 62  | 20 | 7  | 34.94  | b8b16y4*y4y5y6y20                            | 2273.20 | 104.442 | 62315  | 2 | 1137.10 | 5.48   |
| P02910 HISJ_SALTY Histidine-binding periplasmic protein | 5  |                       | QPVGKDYK                        | 193 | 8  | 12 | 49.9   | b2*b2b3b5b7*b7*b7b8*b8y5y8*y8                | 934.50  | 54.324  | 21235  | 2 | 467.75  | 1.96   |
| P02910 HISJ_SALTY Histidine-binding periplasmic protein | 6  |                       | LFGVGTGMGLR                     | 211 | 11 | 4  | 19.74  | b3b9*b9y6                                    | 1107.58 | 74.135  | 4990   | 2 | 554.30  | -13.78 |
| P02910 HISJ_SALTY Histidine-binding periplasmic protein | 7  |                       | GIEIVSYQGQDNIYSDLTAGR           | 155 | 21 | 15 | 56.41  | b3*b3b10b11*b11b12y4*y4y6*y6y7*y7y9y12*y12   | 2299.15 | 62.665  | 4854   | 4 | 575.54  | 14.23  |
| P02910 HISJ_SALTY Histidine-binding periplasmic protein | 8  |                       | IDAAFQDEVAASEGFLK               | 176 | 17 | 5  | 28.53  | b4b5b8b14*b14                                | 1810.85 | 55.091  | 4628   | 3 | 604.29  | -21.91 |
| P02910 HISJ_SALTY Histidine-binding periplasmic protein | 9  |                       | NAQGELVGFDIDLAK                 | 42  | 15 | 4  | 14.47  | b10b14*b14y7                                 | 1589.81 | 75.378  | 2241   | 2 | 795.41  | -1.77  |
| P02910 HISJ_SALTY Histidine-binding periplasmic protein | 10 |                       | QQEIAFTDK                       | 99  | 9  | 8  | 64     | b4*b4b6*b6b7y5y7y8                           | 1079.54 | 78.114  | 2240   | 2 | 540.27  | 3.28   |
| P02910 HISJ_SALTY Histidine-binding periplasmic protein | 11 |                       | IGTDPTYAPFESKNAQGELVGFDIDLAK    | 29  | 28 | 4  | 19.6   | b6y3y4y14                                    | 2996.51 | 96.663  | 27159  | 3 | 999.51  | 7.17   |
| P02910 HISJ_SALTY Histidine-binding periplasmic protein | 12 | Carbamidomethyl+C(18) | NAQGELVGFDIDLAKELCK             | 42  | 19 | 3  | 12.16  | b3b12y11                                     | 2120.05 | 87.222  | 10573  | 3 | 707.36  | -8.41  |
| P02910 HISJ_SALTY Histidine-binding periplasmic protein | 13 |                       | ADGTYEKLAK                      | 240 | 10 | 4  | 36.38  | b3b4b5y9                                     | 1095.57 | 32.820  | 8201   | 2 | 548.29  | 5.24   |
| P02910 HISJ_SALTY Histidine-binding periplasmic protein | 14 |                       | IDAAFQDEVAASEGFLKQPVGK          | 176 | 22 | 3  | 17.85  | b3b10b12                                     | 2320.16 | 64.038  | 4775   | 3 | 774.06  | -11.26 |
| P02910 HISJ_SALTY Histidine-binding periplasmic protein | 15 |                       | EALNKAFEMR                      | 229 | 11 | 8  | 47.47  | b9*b9y3y4y7*y7y8*y8                          | 1279.64 | 59.743  | 3668   | 2 | 640.32  | -7.15  |
| P02910 HISJ_SALTY Histidine-binding periplasmic protein | 16 |                       | IRIGTDPTYAPFESK                 | 27  | 15 | 4  | 22.55  | b9*b9b13b14                                  | 1694.86 | 68.971  | 2883   | 3 | 565.63  | -7.78  |
| P02910 HISJ_SALTY Histidine-binding periplasmic protein | 17 | Phosphoryl STY(9)     | IDAIMSSLSITEK                   | 85  | 13 | 5  | 23.58  | b5b8*b8y3y6                                  | 1487.71 | 38.076  | 1684   | 3 | 496.58  | 10.58  |

|                                      |    |                       |                                               |     |    |    |       |                                      |         |         |        |   |         |        |
|--------------------------------------|----|-----------------------|-----------------------------------------------|-----|----|----|-------|--------------------------------------|---------|---------|--------|---|---------|--------|
| P0A1H3 EFG_SALTY Elongation factor G | 1  |                       | VYSGVVNSGDTVLSNVK                             | 337 | 17 | 13 | 67.97 | b2b5b11b12b13y2y5y10y11*y11y12y14y17 | 1737.91 | 62.771  | 103981 | 2 | 869.46  | 4.14   |
| P0A1H3 EFG_SALTY Elongation factor G | 2  |                       | IATDPFVGNLTFFR                                | 323 | 14 | 9  | 48.84 | b2b4y2y3y4y7y8y10y14                 | 1597.84 | 94.010  | 67111  | 2 | 799.43  | 3.90   |
| P0A1H3 EFG_SALTY Elongation factor G | 3  |                       | IGEVHDGAATMDWMEQEQR                           | 39  | 20 | 10 | 45.04 | b3b11b12y2°y2y3y5y6y7y20             | 2331.99 | 63.181  | 49614  | 3 | 778.00  | -1.47  |
| P0A1H3 EFG_SALTY Elongation factor G | 4  |                       | EFNVEANVGKPVAYR                               | 475 | 16 | 8  | 27.39 | b3°b3b8y4y6*y6y12y16                 | 1820.91 | 54.265  | 43848  | 3 | 607.64  | -10.19 |
| P0A1H3 EFG_SALTY Elongation factor G | 5  |                       | SGPLAGYPVVDLGVR                               | 562 | 15 | 9  | 29.49 | b2b5b7°b7y2y4y8y10y15                | 1499.82 | 77.270  | 32813  | 2 | 750.41  | -2.77  |
| P0A1H3 EFG_SALTY Elongation factor G | 6  |                       | LHFGSYHDVDSSELAFK                             | 577 | 17 | 5  | 13.09 | b6y1y12y16y17                        | 1951.91 | 92.713  | 30620  | 3 | 651.31  | -2.88  |
| P0A1H3 EFG_SALTY Elongation factor G | 7  | Carbamidomethyl+C(20) | AGDIAAAIGLKDVTTGDTLCDPENPIILER                | 378 | 30 | 7  | 23.68 | b3b7b18y4y10y11y30                   | 3138.61 | 85.841  | 22379  | 3 | 1046.88 | 4.12   |
| P0A1H3 EFG_SALTY Elongation factor G | 8  |                       | GQSEVTGVK                                     | 643 | 10 | 5  | 29.11 | y4y7y8°y8y10                         | 1033.50 | 25.976  | 19207  | 2 | 517.26  | -12.52 |
| P0A1H3 EFG_SALTY Elongation factor G | 9  |                       | GQYGHVVIDMYPLEPGSNPK                          | 512 | 20 | 6  | 21.52 | b4b9b12y2y10y19                      | 2201.07 | 74.265  | 15769  | 3 | 734.36  | -1.11  |
| P0A1H3 EFG_SALTY Elongation factor G | 10 |                       | YLGGEELTEEEIK                                 | 236 | 13 | 7  | 33.29 | b5b7b8y5°y5y9y13                     | 1509.74 | 58.563  | 11605  | 2 | 755.38  | 7.60   |
| P0A1H3 EFG_SALTY Elongation factor G | 11 |                       | AINWNDADQGVTFEYEDIPADMDLANEWHQNLIESAEESEELMEK | 189 | 47 | 14 | 72    | b3b4b11y3y4y6y7y8y9°y9y10°y10y13y29  | 5380.39 | 126.572 | 10778  | 4 | 1345.85 | 0.64   |
| P0A1H3 EFG_SALTY Elongation factor G | 12 |                       | YDDAPNNVAQAVIEAR                              | 686 | 16 | 4  | 20.25 | b12b13y8y16                          | 1745.83 | 74.026  | 6473   | 2 | 873.42  | -10.70 |
| P0A1H3 EFG_SALTY Elongation factor G | 13 |                       | GVQAMLDIVIDYLPSPVDVPAINGILDDGK                | 273 | 30 | 8  | 20.5  | b8b12°b12b13°b13y2y14y21             | 3095.59 | 103.999 | 4357   | 4 | 774.65  | -1.10  |
| P0A1H3 EFG_SALTY Elongation factor G | 14 |                       | VEVETPEENTGDVIGDLSR                           | 618 | 19 | 7  | 35.33 | b10b12y12*y12y13*y13y14              | 2058.97 | 59.778  | 2801   | 4 | 515.50  | -5.45  |
| P0A1H3 EFG_SALTY Elongation factor G | 15 |                       | LGANPVPLQLAIGAEEGFTGVVDLVK                    | 161 | 26 | 8  | 26.57 | b5*b5b6*b6y5y8y14°y14                | 2607.40 | 120.455 | 20833  | 3 | 869.80  | -15.45 |
| P0A1H3 EFG_SALTY Elongation factor G | 16 |                       | VVGQIK                                        | 153 | 6  | 1  | 11.88 | b4                                   | 643.41  | 45.686  | 14687  | 1 | 643.41  | -7.21  |
| P0A1H3 EFG_SALTY Elongation factor G | 17 |                       | HASDDEPFSALAFK                                | 309 | 14 | 3  | 15.39 | b6y7y9                               | 1534.72 | 72.050  | 8703   | 2 | 767.86  | -0.64  |
| P0A1H3 EFG_SALTY Elongation factor G | 18 |                       | ADQEK                                         | 425 | 5  | 1  | 11.25 | y3                                   | 590.27  | 38.109  | 7485   | 1 | 590.27  | -14.79 |
| P0A1H3 EFG_SALTY Elongation factor G | 19 |                       | GGVIPGEYIPAVDK                                | 541 | 14 | 3  | 23.17 | b6b11b12                             | 1414.79 | 72.687  | 7065   | 2 | 707.90  | 20.02  |
| P0A1H3 EFG_SALTY Elongation factor G | 20 |                       | IHAEVPLSEMGYATQLR                             | 653 | 18 | 7  | 16.78 | b3b13°b13y10*y10y12°y12              | 2062.00 | 74.137  | 5359   | 2 | 1031.50 | -20.48 |
| P0A1H3 EFG_SALTY Elongation factor G | 21 |                       | TTTTTER                                       | 23  | 6  | 1  | 11.88 | y5                                   | 708.36  | 34.596  | 4634   | 2 | 354.68  | 10.43  |
| P0A1H3 EFG_SALTY Elongation factor G | 22 |                       | ASYTMEFLK                                     | 677 | 9  | 4  | 25.47 | b4°b4b5y6                            | 1089.54 | 59.738  | 4111   | 2 | 545.27  | 6.72   |
| P0A1H3 EFG_SALTY Elongation factor G | 23 | Carbamidomethyl+C(10) | VLDGAVMVYCAVGGVQPQSETVWR                      | 104 | 24 | 6  | 19.8  | b4b5°b5b9y6°y6                       | 2621.23 | 38.026  | 3586   | 3 | 874.42  | -20.21 |
| P0A1H3 EFG_SALTY Elongation factor G | 24 |                       | INIIDTPGHVDFTIEVER                            | 83  | 18 | 5  | 16.78 | b4b9*b9y7y11                         | 2068.04 | 90.567  | 3487   | 2 | 1034.52 | -15.46 |
| P0A1H3 EFG_SALTY Elongation factor G | 25 |                       | VWTDEESNQTHIAGMGELHLDIIVDR                    | 446 | 26 | 3  | 10.93 | b10b12y12                            | 2954.40 | 129.062 | 2684   | 3 | 985.47  | -20.74 |
| P0A1H3 EFG_SALTY Elongation factor G | 26 |                       | EDPSFR                                        | 440 | 6  | 2  | 11.88 | y5°y5                                | 750.34  | 49.662  | 2082   | 1 | 750.34  | 1.46   |
| P0A1H3 EFG_SALTY Elongation factor G | 27 | Carbamidomethyl+C(11) | VLNNEIILVTCGSAFK                              | 255 | 16 | 4  | 22.09 | y4y7y8°y8                            | 1777.96 | 86.408  | 2027   | 3 | 593.32  | 4.81   |
| P0A1H3 EFG_SALTY Elongation factor G | 28 |                       | NIGISAHIDAGK                                  | 11  | 12 | 4  | 28.15 | y4y6°y6y9                            | 1195.62 | 95.384  | 1977   | 1 | 1195.62 | -17.56 |

|                                                |    |                                          |                                      |     |    |    |       |                                   |         |         |        |   |         |        |
|------------------------------------------------|----|------------------------------------------|--------------------------------------|-----|----|----|-------|-----------------------------------|---------|---------|--------|---|---------|--------|
| P0A1H3 EFG_SALTY Elongation factor G           | 29 |                                          | GITITSAATTAFWSGMAKQYEPHR             | 59  | 24 | 4  | 21.34 | y4y6y7°y7                         | 2624.26 | 76.867  | 44481  | 4 | 656.82  | -11.54 |
| P0A1H3 EFG_SALTY Elongation factor G           | 30 |                                          | QYEPHRINIIDTPGHVDFTIEVER             | 77  | 24 | 3  | 17.36 | y4y6y11                           | 2878.45 | 100.751 | 24587  | 3 | 960.16  | 1.10   |
| P0A1H3 EFG_SALTY Elongation factor G           | 31 |                                          | YLGGEELTEEEIKQALR                    | 236 | 17 | 4  | 21.75 | b4b7b8°b8                         | 1977.99 | 74.970  | 20085  | 3 | 660.00  | -11.05 |
| P0A1H3 EFG_SALTY Elongation factor G           | 32 | Carbamidomethyl+C(13)                    | QRVLNNEILVTCGSAFK                    | 253 | 18 | 4  | 12.58 | b3*b3y8y14                        | 2062.09 | 96.463  | 18293  | 3 | 688.03  | -10.89 |
| P0A1H3 EFG_SALTY Elongation factor G           | 33 |                                          | SGPLAGYPVVDLGVRLHFGSYHD<br>VDSSELAfk | 562 | 32 | 7  | 34.11 | b6b7°b7b8y11°y11y13               | 3432.77 | 94.435  | 15939  | 4 | 858.95  | 12.80  |
| P0A1H3 EFG_SALTY Elongation factor G           | 34 |                                          | IAFVNKMDR                            | 137 | 9  | 6  | 50.99 | b4b7b8°b8y6y8                     | 1093.59 | 46.783  | 7831   | 2 | 547.30  | 2.68   |
| P0A1H3 EFG_SALTY Elongation factor G           | 35 | Carbamidomethyl+C(13)                    | SMRVLDGAVMVYCAVGGVQPQS<br>ETVWR      | 101 | 27 | 4  | 32.37 | b11b12y11y12                      | 2995.47 | 70.012  | 6446   | 3 | 999.16  | 2.36   |
| P0A1H3 EFG_SALTY Elongation factor G           | 36 |                                          | QSGGRGQYGHVVIMYPLEPGSN<br>PK         | 507 | 25 | 4  | 15.44 | b7b11b14y7                        | 2686.32 | 109.400 | 5222   | 3 | 896.11  | 5.91   |
| P0A1H3 EFG_SALTY Elongation factor G           | 37 |                                          | GYEFINDIKGGVIPGEYIPAVDK              | 532 | 23 | 4  | 17.57 | b5b8b12°b12                       | 2494.26 | 84.169  | 5000   | 3 | 832.09  | -9.69  |
| P0A1H3 EFG_SALTY Elongation factor G           | 38 | Carbamidomethyl+C(10)                    | VLDGAVMVYCAVGGVQPQSETV<br>WRQANK     | 104 | 28 | 7  | 42.99 | b4b5b6b7b10y11*y11                | 3062.49 | 123.709 | 3251   | 3 | 1021.50 | -9.65  |
| P0A1H3 EFG_SALTY Elongation factor G           | 39 |                                          | NIGISAHDAGKTTTTER                    | 11  | 18 | 4  | 12.58 | b12y10°y10y13                     | 1884.98 | 92.197  | 2163   | 2 | 942.99  | 1.55   |
| P0A1H3 EFG_SALTY Elongation factor G           | 40 |                                          | INIIDTPGHVDFTIEVERSMR                | 83  | 21 | 4  | 20.41 | b11b12b20y11                      | 2442.27 | 97.417  | 2055   | 4 | 611.32  | 9.00   |
| P0A1H3 EFG_SALTY Elongation factor G           | 41 |                                          | VYSGVVNSGDTVLSNVKTAR                 | 337 | 20 | 3  | 18.61 | b10b13b16                         | 2066.07 | 104.963 | 1739   | 3 | 689.36  | -8.98  |
| P0A1H3 EFG_SALTY Elongation factor G           | 42 |                                          | GQESEVTGVKIHAEVPLSEMFY<br>ATQLR      | 643 | 28 | 5  | 21.74 | b10y7y9y12y13                     | 3076.58 | 120.759 | 1558   | 3 | 1026.20 | 13.57  |
| P0A1H3 EFG_SALTY Elongation factor G           | 43 | Phosphoryl STY(9)                        | MEFPEPVISIAVEPK                      | 408 | 15 | 5  | 20.16 | b8b12y3°y3y7_HPO3 y7              | 1765.81 | 42.459  | 7232   | 3 | 589.28  | -14.03 |
| P0A1H3 EFG_SALTY Elongation factor G           | 44 | Phosphoryl STY(8)                        | VYSGVVNSGDTVLSNVK                    | 337 | 17 | 8  | 33.62 | b4°b4b6°b6b12_HPO3<br>b12b13y8y12 | 1817.88 | 48.795  | 5012   | 3 | 606.63  | 9.07   |
| P0A1H3 EFG_SALTY Elongation factor G           | 45 | Oxidation+M(10)                          | IHAEVPLSEMFYATQLR                    | 653 | 18 | 4  | 19.85 | b4b9b15y9                         | 2078.06 | 96.453  | 23209  | 3 | 693.36  | 13.04  |
| P0A1H3 EFG_SALTY Elongation factor G           | 46 | Carbamidomethyl+C(10)<br>;Oxidation+M(7) | VLDGAVMVYCAVGGVQPQSETV<br>WR         | 104 | 24 | 6  | 22.8  | b4b6b9b14y13*y13                  | 2637.27 | 95.498  | 21726  | 3 | 879.76  | -4.91  |
| P0A1H3 EFG_SALTY Elongation factor G           | 47 | Oxidation+M(10)                          | GQYGHVVIMYPLEPGSNPK                  | 512 | 20 | 4  | 11.82 | b7b12°b12y13                      | 2217.07 | 74.224  | 1929   | 2 | 1109.04 | 1.10   |
| P0A1H3 EFG_SALTY Elongation factor G           | 48 |                                          | EENTGDVIGDLR                         | 624 | 13 | 1  | 8.58  | b8                                | 1404.67 | 59.787  | 21302  | 2 | 702.84  | 6.60   |
| P0A1H3 EFG_SALTY Elongation factor G           | 49 |                                          | EFNVEANVGKPVAYR                      | 475 | 16 | 5  | 13.71 | b6b11*b11y10*y10                  | 1802.93 | 54.321  | 2139   | 3 | 601.65  | 8.12   |
| P0A7K0 RL11_SALTY 50S ribosomal<br>protein L11 | 1  |                                          | AQLQEIAQTK                           | 103 | 10 | 11 | 66.67 | b2*b2b3y1y2y3y5y6y8y9y<br>10      | 1129.61 | 39.533  | 173518 | 2 | 565.31  | -6.59  |
| P0A7K0 RL11_SALTY 50S ribosomal<br>protein L11 | 2  |                                          | AADMTGADIEAMTR                       | 113 | 14 | 11 | 70.4  | b3b13y2y4y6y7y8°y8y9y10<br>y14    | 1452.65 | 58.051  | 98911  | 2 | 726.83  | 2.10   |
| P0A7K0 RL11_SALTY 50S ribosomal<br>protein L11 | 3  |                                          | SFTFVTK                              | 65  | 7  | 10 | 43.25 | b1b2b6°b6y1y2y3y4y5y7             | 829.44  | 54.377  | 64415  | 2 | 415.22  | -8.02  |
| P0A7K0 RL11_SALTY 50S ribosomal<br>protein L11 | 4  |                                          | SGSGKPNKDK                           | 87  | 10 | 9  | 34.34 | b1b6b7b10°b10y2°y2y3y9            | 1017.53 | 32.045  | 17311  | 2 | 509.27  | -1.80  |
| P0A7K0 RL11_SALTY 50S ribosomal<br>protein L11 | 5  |                                          | SIEGTAR                              | 127 | 7  | 10 | 32    | b1b2°b2b4°b4b7y5°y5y6y7           | 733.38  | 32.001  | 9943   | 1 | 733.38  | -10.82 |
| P0A7K0 RL11_SALTY 50S ribosomal<br>protein L11 | 6  |                                          | TPPAAVLLK                            | 72  | 9  | 3  | 25.47 | b5y5y7                            | 909.56  | 54.894  | 91148  | 2 | 455.28  | -16.78 |
| P0A7K0 RL11_SALTY 50S ribosomal<br>protein L11 | 7  |                                          | AQLQEIAQTKAADMTGADIEAMT<br>R         | 103 | 24 | 3  | 17.36 | y3y10y14                          | 2563.25 | 72.769  | 6278   | 3 | 855.09  | 0.38   |
| P0A7K0 RL11_SALTY 50S ribosomal<br>protein L11 | 8  |                                          | SIEGTARSMGLVVED                      | 127 | 15 | 7  | 38.82 | b5b6b8y7y8y11°y11                 | 1563.78 | 60.569  | 4733   | 2 | 782.40  | 9.52   |



|                                                           |    |                       |                          |     |    |    |       |                                                         |         |         |       |   |         |        |
|-----------------------------------------------------------|----|-----------------------|--------------------------|-----|----|----|-------|---------------------------------------------------------|---------|---------|-------|---|---------|--------|
| P0A7K0 RL11_SALTY 50S ribosomal protein L11               | 9  |                       | AFNAKTDSIEK              | 40  | 11 | 4  | 19.74 | b8b10*b10y5                                             | 1223.62 | 54.365  | 1731  | 2 | 612.32  | -3.19  |
| P0A7K0 RL11_SALTY 50S ribosomal protein L11               | 10 | Oxidation+M(12)       | AADMTGADIEAMTR           | 113 | 14 | 3  | 15.39 | b4y6y11                                                 | 1468.65 | 41.654  | 10941 | 3 | 490.22  | 3.08   |
| P0A7K0 RL11_SALTY 50S ribosomal protein L11               | 11 |                       | QLQEIAQTK                | 104 | 9  | 4  | 17.86 | b3*b3b8*b8                                              | 1058.57 | 39.544  | 16773 | 2 | 529.79  | -11.65 |
| P0A7K0 RL11_SALTY 50S ribosomal protein L11               | 12 |                       | LQEIAQTK                 | 105 | 8  | 0  | 3.14  |                                                         | 930.52  | 39.517  | 1920  | 1 | 930.52  | -9.38  |
| Q7CPD8 YIFE_SALTY UPF0438 protein yifE                    | 1  |                       | AESFTTTNR                | 1   | 9  | 5  | 38.49 | b7y4y5y6y9                                              | 1026.48 | 45.985  | 7916  | 2 | 513.75  | -2.26  |
| Q7CPD8 YIFE_SALTY UPF0438 protein yifE                    | 2  |                       | HGHAFNDLDLGKR            | 37  | 13 | 6  | 9.46  | b2b5y12*y12y13*y13                                      | 1479.74 | 59.703  | 7370  | 2 | 740.38  | -0.50  |
| Q7CPD8 YIFE_SALTY UPF0438 protein yifE                    | 3  |                       | GEREPVTD AER             | 65  | 11 | 10 | 42.24 | b2b3*b3b4*b4b8y2*y2y6y7                                 | 1258.60 | 23.116  | 3761  | 2 | 629.80  | -4.07  |
| Q7CPD8 YIFE_SALTY UPF0438 protein yifE                    | 4  |                       | HGDFTIK                  | 23  | 7  | 4  | 35.01 | b3b5*b5b6                                               | 817.41  | 31.990  | 4578  | 2 | 409.21  | -13.59 |
| Q7CPD8 YIFE_SALTY UPF0438 protein yifE                    | 5  |                       | HGHAFNDLDLGK             | 37  | 12 | 13 | 49.35 | b6b11°b11y4°y4y6°y6y8°y8*y8y9°y9*y9                     | 1323.67 | 46.763  | 2207  | 2 | 662.34  | 19.64  |
| Q7CPD8 YIFE_SALTY UPF0438 protein yifE                    | 6  |                       | EAQLLERHGHAFNDLDLGK      | 30  | 19 | 4  | 33.38 | y8y9y10y12                                              | 2163.07 | 74.842  | 21529 | 3 | 721.70  | -9.26  |
| Q7CPD8 YIFE_SALTY UPF0438 protein yifE                    | 7  | Carbamidomethyl+C(14) | EPVTEEEKLFVAVCR          | 50  | 15 | 3  | 14.47 | b5b8y4                                                  | 1805.92 | 59.718  | 4217  | 4 | 452.24  | 7.23   |
| Q7CPD8 YIFE_SALTY UPF0438 protein yifE                    | 8  |                       | YFDNKHYPR                | 10  | 9  | 5  | 38.49 | b8y6y7y8°y8                                             | 1239.60 | 49.629  | 3951  | 2 | 620.30  | 6.11   |
| Q7CPD8 YIFE_SALTY UPF0438 protein yifE                    | 9  |                       | HYPRGFSR                 | 15  | 8  | 7  | 64.62 | b3b4b5b6b7°b7y4                                         | 1019.51 | 46.751  | 2385  | 2 | 510.26  | -5.75  |
| Q7CPD8 YIFE_SALTY UPF0438 protein yifE                    | 10 |                       | REPVT EEEK               | 49  | 9  | 6  | 37.97 | b3°b3b5y6°y6y7                                          | 1116.56 | 30.761  | 2038  | 2 | 558.78  | 2.73   |
| Q7CPD8 YIFE_SALTY UPF0438 protein yifE                    | 11 |                       | HGHAFNDLDLGK             | 37  | 12 | 6  | 24.01 | y7°y7y8*y8y11*y11                                       | 1323.64 | 59.749  | 3617  | 2 | 662.32  | -5.63  |
| P23905 DGAL_SALTY D-galactose-binding periplasmic protein | 1  |                       | SGAMAGTVLNDANNQAK        | 269 | 17 | 21 | 78.25 | b1b2b3°b3b9°b9b10b11b17y1y2y4*y4y7y8°y8y9y12°y12*y12y13 | 1661.79 | 46.789  | 32433 | 2 | 831.40  | 1.69   |
| P23905 DGAL_SALTY D-galactose-binding periplasmic protein | 2  |                       | ESGVIQGDLIAK             | 136 | 12 | 6  | 19.12 | b1b2b9b10*b10y2                                         | 1229.66 | 54.288  | 4571  | 2 | 615.33  | -12.41 |
| P23905 DGAL_SALTY D-galactose-binding periplasmic protein | 3  |                       | VLTL SAVMASLLFGAHAHAADTR | 4   | 23 | 4  | 24.96 | y3y4y8y13                                               | 2352.27 | 88.274  | 2521  | 3 | 784.76  | 6.95   |
| P23905 DGAL_SALTY D-galactose-binding periplasmic protein | 4  |                       | GEPGHPDAEAR              | 170 | 11 | 3  | 22.75 | b5y5y6                                                  | 1135.53 | 92.042  | 1742  | 1 | 1135.53 | 10.86  |
| P23905 DGAL_SALTY D-galactose-binding periplasmic protein | 5  |                       | SSIPVFGVDALPEALALVK      | 250 | 19 | 5  | 26.64 | b7y4y8y13y14                                            | 1926.10 | 108.371 | 47792 | 2 | 963.55  | 3.93   |
| P23905 DGAL_SALTY D-galactose-binding periplasmic protein | 6  |                       | SAPDVQLLMNDSQNDQSK       | 52  | 18 | 3  | 12.58 | b7b13y8                                                 | 1989.95 | 77.284  | 31572 | 2 | 995.48  | 16.50  |
| P23905 DGAL_SALTY D-galactose-binding periplasmic protein | 7  |                       | ALAINLVDPAAGTVIEK        | 84  | 18 | 6  | 40.52 | b3y7y10y11y13y14                                        | 1766.01 | 81.094  | 24410 | 2 | 883.51  | 2.70   |
| P23905 DGAL_SALTY D-galactose-binding periplasmic protein | 8  |                       | EPSR                     | 115 | 4  | 1  | 10.62 | b3                                                      | 488.25  | 38.163  | 9609  | 1 | 488.25  | 12.81  |
| P23905 DGAL_SALTY D-galactose-binding periplasmic protein | 9  |                       | MDAWLSGPNANK             | 214 | 12 | 6  | 41.41 | b6y5*y5y7y8y10                                          | 1303.61 | 48.836  | 7796  | 3 | 435.21  | -2.81  |

|                                                           |    |                 |                                  |     |    |    |       |                                       |         |         |       |   |         |        |
|-----------------------------------------------------------|----|-----------------|----------------------------------|-----|----|----|-------|---------------------------------------|---------|---------|-------|---|---------|--------|
| P23905 DGAL_SALTY D-galactose-binding periplasmic protein | 10 |                 | AYYVGTD SK                       | 127 | 9  | 9  | 81.27 | b3b4b5y4°y4y5y7°y7y8                  | 1003.48 | 32.023  | 4158  | 2 | 502.24  | 8.39   |
| P23905 DGAL_SALTY D-galactose-binding periplasmic protein | 11 |                 | ALDSYDK                          | 120 | 7  | 4  | 32    | b3b4°b4y3                             | 811.39  | 72.590  | 3475  | 1 | 811.39  | 12.26  |
| P23905 DGAL_SALTY D-galactose-binding periplasmic protein | 12 |                 | DNLSEFTQK                        | 323 | 9  | 6  | 50.99 | b3b4b8y3*y3y7                         | 1081.53 | 42.471  | 3428  | 2 | 541.27  | 15.35  |
| P23905 DGAL_SALTY D-galactose-binding periplasmic protein | 13 |                 | HWQANQG WDLNK                    | 148 | 12 | 11 | 65.37 | b3b4b5y5°y5y8y9°y9*y9y10*y10          | 1496.70 | 42.483  | 1573  | 3 | 499.57  | -4.49  |
| P23905 DGAL_SALTY D-galactose-binding periplasmic protein | 14 |                 | NLAEGKGAADGTSWK                  | 293 | 15 | 4  | 22.55 | y4y12y13°y13                          | 1504.76 | 56.081  | 15127 | 2 | 752.88  | 13.63  |
| P23905 DGAL_SALTY D-galactose-binding periplasmic protein | 15 |                 | DGKSAPDVQLLMNDSQNDQSK            | 49  | 21 | 13 | 58.34 | b3b5b6b9b10°b10*b10b11°b11*b11y4°y4y5 | 2290.05 | 59.732  | 11049 | 3 | 764.02  | -5.86  |
| P23905 DGAL_SALTY D-galactose-binding periplasmic protein | 16 |                 | AIEKD GK                         | 45  | 7  | 3  | 32    | b5b6y6                                | 760.42  | 32.911  | 8634  | 2 | 380.71  | -2.25  |
| P23905 DGAL_SALTY D-galactose-binding periplasmic protein | 17 |                 | ALDSYDKAYYVGTD SK                | 120 | 16 | 3  | 13.71 | b8y3y5                                | 1795.84 | 49.605  | 5718  | 3 | 599.29  | 2.85   |
| P23905 DGAL_SALTY D-galactose-binding periplasmic protein | 18 |                 | TTYVVKELNDK                      | 181 | 11 | 4  | 28.77 | b3b8y3y6                              | 1309.68 | 45.437  | 5615  | 2 | 655.34  | -14.82 |
| P23905 DGAL_SALTY D-galactose-binding periplasmic protein | 19 |                 | MDAWLSGPNANKIEVVIANNDAMAMGAVEALK | 214 | 32 | 3  | 22.24 | b5y10y11                              | 3343.68 | 103.638 | 4749  | 4 | 836.68  | 9.20   |
| P23905 DGAL_SALTY D-galactose-binding periplasmic protein | 20 |                 | ATFDLAKNLAEGK                    | 286 | 13 | 6  | 25.77 | b3°b3b6°b6b8°b8                       | 1377.72 | 74.121  | 3453  | 2 | 689.37  | -9.83  |
| P23905 DGAL_SALTY D-galactose-binding periplasmic protein | 21 |                 | ESGVIQGD LIAKHWQANQG WDLNK       | 136 | 24 | 5  | 20.34 | b7°b7°b7y5y6                          | 2707.35 | 67.094  | 3164  | 3 | 903.12  | -1.80  |
| P23905 DGAL_SALTY D-galactose-binding periplasmic protein | 22 |                 | HWQANQG WDLNKDGK                 | 148 | 15 | 3  | 22.55 | y5y7y8                                | 1796.85 | 53.421  | 2995  | 2 | 898.93  | 2.45   |
| P23905 DGAL_SALTY D-galactose-binding periplasmic protein | 23 |                 | SGAMAGTVLNDANNQAKATFDLAK         | 269 | 24 | 5  | 34.03 | b7b8b9y4y7                            | 2408.22 | 83.333  | 2524  | 3 | 803.41  | 11.86  |
| P23905 DGAL_SALTY D-galactose-binding periplasmic protein | 24 | Oxidation+M(13) | IEVVIANNDAMAMGAVEALK             | 226 | 20 | 6  | 29.14 | b9b12y11y12y15y19                     | 2075.04 | 67.136  | 52350 | 3 | 692.35  | -5.29  |
| P23905 DGAL_SALTY D-galactose-binding periplasmic protein | 25 | Oxidation+M(4)  | SGAMAGTVLNDANNQAK                | 269 | 17 | 3  | 13.09 | b4b12y3                               | 1677.79 | 45.501  | 20672 | 3 | 559.94  | 5.09   |
| P23905 DGAL_SALTY D-galactose-binding periplasmic protein | 26 | Oxidation+M(13) | GIQTEQLALDTAMWDTAQAKDK           | 192 | 22 | 4  | 11.33 | b6°b6b13y11                           | 2450.15 | 81.387  | 2604  | 3 | 817.39  | -13.45 |
| P23905 DGAL_SALTY D-galactose-binding periplasmic protein | 27 |                 | SGAMAGTVLND                      | 269 | 11 | 2  | 7.99  | y6*y6                                 | 1035.48 | 46.754  | 2669  | 2 | 518.24  | 0.47   |
| P66038 RISB_SALTY 6                                       | 1  |                 | IGQVKDDNITVVWVPGAYELPLATEALAK    | 40  | 29 | 12 | 71.67 | b9b10°b10b11°b11b12b13b14y3y9y15y29   | 3110.69 | 99.080  | 87702 | 3 | 1037.57 | 4.71   |
| P66038 RISB_SALTY 6                                       | 2  |                 | FNQFINDSLLDGAVDALTR              | 21  | 19 | 12 | 82.9  | b3b6b13y4y5y8y9y10y12y14y15y19        | 2109.07 | 102.178 | 58304 | 2 | 1055.04 | 4.63   |
| P66038 RISB_SALTY 6                                       | 3  |                 | GAEAALTALEMINVLK                 | 136 | 16 | 5  | 22.25 | b5b8b12y1y4                           | 1643.90 | 103.854 | 29676 | 2 | 822.45  | -1.41  |

|                                               |    |                      |                                  |     |    |    |       |                                                  |         |         |        |   |         |        |
|-----------------------------------------------|----|----------------------|----------------------------------|-----|----|----|-------|--------------------------------------------------|---------|---------|--------|---|---------|--------|
| [P66038]RISB_SALTY 6                          | 4  |                      | VAITIAIAR                        | 14  | 7  | 3  | 35.01 | y3y4y6                                           | 743.46  | 44.755  | 17029  | 2 | 372.23  | -20.61 |
| [P66038]RISB_SALTY 6                          | 5  |                      | DDNITVVWVPGAYELPLATEALA<br>KSGK  | 45  | 27 | 5  | 14.83 | b8°b8b12b23y3                                    | 2857.48 | 60.623  | 31144  | 4 | 715.12  | -7.69  |
| [P66038]RISB_SALTY 6                          | 6  | Phosphoryl STY(13)   | DDNITVVWVPGAYELPLATEALA<br>K     | 45  | 24 | 5  | 11.05 | b8°b8b12°b12y12                                  | 2665.29 | 93.119  | 17798  | 3 | 889.10  | -5.22  |
| [P0A8B8]YBAB_SALTY UPF0133 protein<br>ybaB    | 1  |                      | EMLEDLVAAAFNDAARR                | 66  | 17 | 4  | 13.09 | b12°b12b14y6                                     | 1891.93 | 59.869  | 4515   | 2 | 946.47  | -1.74  |
| [P0A8B8]YBAB_SALTY UPF0133 protein<br>ybaB    | 2  |                      | VEIDPSLLEDDKEMLEDLVAAAFN<br>DAAR | 54  | 28 | 6  | 14.59 | b2b4°b7y4y6y10                                   | 3089.48 | 128.501 | 2867   | 4 | 773.12  | -7.35  |
| [P0A8B8]YBAB_SALTY UPF0133 protein<br>ybaB    | 3  | Carbamidomethyl+C(9) | VTINGAHNCR                       | 43  | 10 | 9  | 52.41 | b2b6°b6y2y4y5y7*y7y8                             | 1141.55 | 20.547  | 2289   | 2 | 571.28  | -4.81  |
| [P0A8B8]YBAB_SALTY UPF0133 protein<br>ybaB    | 4  |                      | EMLEDLVAAAFNDAAR                 | 66  | 16 | 4  | 18.85 | b3b9y7y9                                         | 1735.86 | 72.419  | 8428   | 2 | 868.43  | 16.95  |
| [P0A8B8]YBAB_SALTY UPF0133 protein<br>ybaB    | 5  |                      | MASVSSGMQLPPGFK                  | 91  | 15 | 6  | 29.49 | b7b10y5y9y10°y10                                 | 1536.75 | 57.562  | 6233   | 2 | 768.88  | -4.61  |
| [P0A8B8]YBAB_SALTY UPF0133 protein<br>ybaB    | 6  |                      | MQEEIAQLEVTGESGAGLVK             | 23  | 20 | 3  | 11.82 | b9b13y4                                          | 2089.07 | 89.662  | 3664   | 3 | 697.03  | 10.63  |
| [P0A8B8]YBAB_SALTY UPF0133 protein<br>ybaB    | 7  |                      | EKMASVSSGMQLPPGFK                | 89  | 17 | 6  | 17.73 | b5b7y11°y11*y11y15                               | 1793.91 | 65.671  | 95057  | 2 | 897.46  | 10.89  |
| [P0A8B8]YBAB_SALTY UPF0133 protein<br>ybaB    | 8  |                      | FGKGGLGNLMK                      | 1   | 11 | 4  | 19.74 | b6b10°b10y9                                      | 1121.62 | 30.737  | 3267   | 2 | 561.31  | 2.61   |
| [P0A8B8]YBAB_SALTY UPF0133 protein<br>ybaB    | 9  |                      | GGLGNLMKQAQQMQEK                 | 4   | 16 | 4  | 31.96 | b10y5y6y7                                        | 1760.88 | 46.021  | 2189   | 2 | 880.94  | 1.18   |
| [P0A8B8]YBAB_SALTY UPF0133 protein<br>ybaB    | 10 |                      | MASVSSGMQLPPGFKMPF               | 91  | 18 | 3  | 12.58 | b6y4y13                                          | 1911.93 | 107.225 | 1694   | 2 | 956.47  | 9.00   |
| [P0A8B8]YBAB_SALTY UPF0133 protein<br>ybaB    | 11 | Phosphoryl STY(11)   | MQEEIAQLEVTGESGAGLVK             | 23  | 20 | 4  | 18.1  | b8b10_H3PO4 b10b12y12                            | 2169.03 | 53.591  | 3435   | 3 | 723.68  | 12.04  |
| [P0A8B8]YBAB_SALTY UPF0133 protein<br>ybaB    | 12 | Oxidation+M(2)       | EMLEDLVAAAFNDAARR                | 66  | 17 | 15 | 66.03 | b3b7b8b10°b10b15°b15b1<br>6y6*y6y7°y7y10°y10*y10 | 1907.93 | 74.174  | 153852 | 3 | 636.65  | -0.96  |
| [P0A8B8]YBAB_SALTY UPF0133 protein<br>ybaB    | 13 | Oxidation+M(8)       | MASVSSGMQLPPGFK                  | 91  | 15 | 4  | 23.8  | b6y6y8y14                                        | 1552.77 | 100.169 | 4998   | 3 | 518.26  | 9.98   |
| [P0A8B8]YBAB_SALTY UPF0133 protein<br>ybaB    | 14 |                      | EMLEDLVAAA                       | 66  | 10 | 0  | 7.54  |                                                  | 1061.51 | 59.794  | 2859   | 2 | 531.26  | -10.23 |
| [P66593]RS6_SALTY 30S ribosomal<br>protein S6 | 1  |                      | YSAAITGAEGK                      | 24  | 11 | 10 | 63.95 | b3°b3b4b7y2y5y6y7y9y11                           | 1067.52 | 33.950  | 212315 | 2 | 534.27  | -11.43 |
| [P66593]RS6_SALTY 30S ribosomal<br>protein S6 | 2  |                      | AHYVLMNVEAPQEVIDELETTFR          | 56  | 23 | 4  | 11.17 | b2b3y4y9                                         | 2704.33 | 112.248 | 97865  | 3 | 902.12  | 1.63   |
| [P66593]RS6_SALTY 30S ribosomal<br>protein S6 | 3  |                      | HYEIVFMVHPDQSEQVPGMIER           | 2   | 22 | 8  | 28.38 | b2b4b8b9y6y10*y10y20                             | 2641.28 | 76.768  | 4619   | 3 | 881.10  | 10.63  |
| [P66593]RS6_SALTY 30S ribosomal<br>protein S6 | 4  |                      | LEDWGRR                          | 38  | 7  | 9  | 60.52 | b2b3b5°b5b6y2y3y6y7                              | 931.47  | 42.423  | 3672   | 2 | 466.24  | -2.62  |
| [P66593]RS6_SALTY 30S ribosomal<br>protein S6 | 5  |                      | FNDAVIR                          | 79  | 7  | 3  | 35.01 | y3y4y5                                           | 834.43  | 42.841  | 106401 | 2 | 417.72  | -15.36 |
| [P66593]RS6_SALTY 30S ribosomal<br>protein S6 | 6  |                      | QLAYPINK                         | 45  | 8  | 3  | 30.87 | b3b5y4                                           | 946.53  | 44.021  | 8761   | 1 | 946.53  | -7.22  |
| [P66593]RS6_SALTY 30S ribosomal<br>protein S6 | 7  |                      | HAVTEASPMVK                      | 93  | 11 | 10 | 68.72 | b4b7°b7b9y5°y5y6y7y10°y<br>10                    | 1169.58 | 45.990  | 3217   | 2 | 585.30  | -12.42 |
| [P66593]RS6_SALTY 30S ribosomal<br>protein S6 | 8  |                      | RHYEIVFMVHPDQSEQVPGMIER          | 1   | 23 | 5  | 19.95 | b11y4y5y9*y9                                     | 2797.34 | 83.491  | 13122  | 3 | 933.12  | -6.37  |
| [P66593]RS6_SALTY 30S ribosomal<br>protein S6 | 9  |                      | TKHAVTEASPMVK                    | 91  | 13 | 3  | 16.52 | b6b12y6                                          | 1398.75 | 42.386  | 2350   | 2 | 699.88  | 6.20   |
| [P66593]RS6_SALTY 30S ribosomal<br>protein S6 | 10 | Oxidation+M(6)       | AHYVLMNVEAPQEVIDELETTFR          | 56  | 23 | 7  | 45.71 | b11b12b13b14y10°y10y13                           | 2720.32 | 112.627 | 12093  | 2 | 1360.67 | 0.27   |
| [P66593]RS6_SALTY 30S ribosomal<br>protein S6 | 11 | Oxidation+M(9)       | HAVTEASPMVK                      | 93  | 11 | 3  | 19.74 | b5b7y7                                           | 1185.59 | 48.698  | 4578   | 2 | 593.30  | -1.03  |
| [P0A1P6]GLNA_SALTY Glutamine<br>synthetase    | 1  |                      | LVPGYEAPVMLAYSAR                 | 322 | 16 | 9  | 59.59 | b12b15°b15y4y5y9y10y11<br>y14                    | 1736.91 | 78.231  | 34862  | 2 | 868.96  | 2.81   |

|                                        |    |                       |                                |     |    |    |       |                           |         |         |       |   |         |        |
|----------------------------------------|----|-----------------------|--------------------------------|-----|----|----|-------|---------------------------|---------|---------|-------|---|---------|--------|
| P0A1P6 GLNA_SALTY Glutamine synthetase | 2  |                       | AINALANPTTNSYKR                | 307 | 15 | 6  | 32.32 | b11y5y7y8y10y15           | 1633.86 | 43.408  | 33874 | 3 | 545.29  | -4.26  |
| P0A1P6 GLNA_SALTY Glutamine synthetase | 3  |                       | EIPQVAGSLEEALNALDLDR           | 406 | 20 | 7  | 18.61 | b2y5°y5y7*y7y12y20        | 2153.11 | 96.570  | 31587 | 3 | 718.37  | -1.59  |
| P0A1P6 GLNA_SALTY Glutamine synthetase | 4  |                       | AGGVFTDEAIDAYIALR              | 430 | 17 | 9  | 52.28 | b5b6b7b11b12b14y2y13y17   | 1781.92 | 60.565  | 28360 | 2 | 891.46  | 6.78   |
| P0A1P6 GLNA_SALTY Glutamine synthetase | 5  |                       | GGYFPVPPVDSAQDIR               | 177 | 16 | 9  | 30.5  | b2b3y2y5y6y10y12°y12y16   | 1717.86 | 70.814  | 28165 | 2 | 859.44  | 5.40   |
| P0A1P6 GLNA_SALTY Glutamine synthetase | 6  |                       | MSAEHVLTMLNEHEVK               | 0   | 16 | 4  | 22.09 | y6y7y11y16                | 1867.89 | 81.375  | 26942 | 3 | 623.30  | -9.61  |
| P0A1P6 GLNA_SALTY Glutamine synthetase | 7  |                       | YAGLSEQUALYYIGGVIK             | 287 | 17 | 4  | 21.75 | b9b10°b10b13              | 1844.98 | 68.908  | 17191 | 3 | 615.66  | -1.52  |
| P0A1P6 GLNA_SALTY Glutamine synthetase | 8  |                       | ADEIQIYK                       | 232 | 8  | 9  | 27.86 | b1b2°b2b4b5°b5y7°y7*y7    | 979.52  | 48.824  | 16257 | 2 | 490.26  | 9.10   |
| P0A1P6 GLNA_SALTY Glutamine synthetase | 9  |                       | ATGIADTVLFGPEPEFFLFDDIR        | 117 | 23 | 6  | 13.64 | b2b6b16y2y3y5             | 2570.26 | 117.879 | 16062 | 3 | 857.43  | -6.65  |
| P0A1P6 GLNA_SALTY Glutamine synthetase | 10 |                       | MTPHPVEFELYYSV                 | 455 | 14 | 5  | 15.39 | b2°b2b8y5y10              | 1711.82 | 52.812  | 9785  | 3 | 571.28  | 10.84  |
| P0A1P6 GLNA_SALTY Glutamine synthetase | 11 | Carbamidomethyl+C(1)  | CDILEPGTLQGYDRDPR              | 89  | 17 | 4  | 22.21 | b8y3y4y10                 | 2004.97 | 34.501  | 5642  | 3 | 669.00  | 13.64  |
| P0A1P6 GLNA_SALTY Glutamine synthetase | 12 |                       | NGTNLFSGDK                     | 277 | 10 | 3  | 29.11 | y5y7y8                    | 1052.51 | 67.218  | 4387  | 1 | 1052.51 | 8.70   |
| P0A1P6 GLNA_SALTY Glutamine synthetase | 13 |                       | AINALANPTTNSYK                 | 307 | 14 | 3  | 15.39 | b11y7y11                  | 1477.78 | 61.525  | 27644 | 2 | 739.40  | 13.13  |
| P0A1P6 GLNA_SALTY Glutamine synthetase | 14 |                       | YVVHNVahr                      | 240 | 9  | 3  | 25.47 | b5b7y6                    | 1094.56 | 39.145  | 19504 | 2 | 547.79  | -20.63 |
| P0A1P6 GLNA_SALTY Glutamine synthetase | 15 |                       | IPVVASPK                       | 345 | 8  | 3  | 35.64 | y3y4y5                    | 810.50  | 39.020  | 19452 | 2 | 405.75  | -13.40 |
| P0A1P6 GLNA_SALTY Glutamine synthetase | 16 |                       | NLYDLPPEEAK                    | 395 | 11 | 6  | 31.78 | b3b10y4°y4y5°y5           | 1288.67 | 59.832  | 15339 | 2 | 644.84  | 21.60  |
| P0A1P6 GLNA_SALTY Glutamine synthetase | 17 |                       | SAEHVLTMLNEHEVK                | 1   | 15 | 11 | 83.07 | b6°b6b8b12y4y5y6°y6y7y8y9 | 1736.84 | 59.757  | 10887 | 3 | 579.62  | -11.03 |
| P0A1P6 GLNA_SALTY Glutamine synthetase | 18 |                       | FTDTK                          | 21  | 5  | 1  | 11.25 | b4                        | 611.31  | 81.250  | 3813  | 1 | 611.31  | 4.89   |
| P0A1P6 GLNA_SALTY Glutamine synthetase | 19 |                       | FNTMTK                         | 225 | 6  | 4  | 34.38 | b5y3y4°y4                 | 741.35  | 32.028  | 3041  | 1 | 741.35  | -8.64  |
| P0A1P6 GLNA_SALTY Glutamine synthetase | 20 | Carbamidomethyl+C(1)  | CDILEPGTLQGYDR                 | 89  | 14 | 8  | 36.64 | b6°b6b7°b7y4y8°y8y9       | 1636.78 | 30.738  | 1796  | 3 | 546.27  | 10.74  |
| P0A1P6 GLNA_SALTY Glutamine synthetase | 21 |                       | GINESDMVLPDASTAVIDPFFADSTLIIR  | 59  | 30 | 8  | 35.58 | b3b6b8b10b14y3y4y6        | 3238.58 | 114.123 | 1786  | 2 | 1619.79 | -7.99  |
| P0A1P6 GLNA_SALTY Glutamine synthetase | 22 | Carbamidomethyl+C(19) | TATFMPPKPMFGDNGSGMHCHMSLAK     | 252 | 25 | 3  | 10.97 | b9y3y7                    | 2753.17 | 66.220  | 1595  | 5 | 551.44  | -15.43 |
| P0A1P6 GLNA_SALTY Glutamine synthetase | 23 |                       | EQHVTIPAHQVNAEEFEEGK           | 28  | 20 | 6  | 18.1  | b6b11*b11b14°b14y8        | 2310.12 | 82.090  | 1551  | 3 | 770.71  | 0.00   |
| P0A1P6 GLNA_SALTY Glutamine synthetase | 24 |                       | FGASISGSHVAIDDIEGAWNSSTKYEGGNK | 140 | 30 | 4  | 11.06 | b6b9°b9y9                 | 3097.45 | 52.627  | 37281 | 3 | 1033.15 | 0.16   |
| P0A1P6 GLNA_SALTY Glutamine synthetase | 25 |                       | VRMTPHPVEFELYYSV               | 453 | 16 | 5  | 22.25 | b6y3°y3y8y12              | 1966.94 | 62.656  | 27629 | 3 | 656.32  | -14.34 |
| P0A1P6 GLNA_SALTY Glutamine synthetase | 26 |                       | LVPGYEAPVMLAYSARNR             | 322 | 18 | 3  | 12.58 | b10b13y7                  | 2007.07 | 101.961 | 12010 | 2 | 1004.04 | 11.98  |
| P0A1P6 GLNA_SALTY Glutamine synthetase | 27 |                       | AEDYLRATGIADTVLFGPEPEFFLFDDIR  | 111 | 29 | 5  | 10.99 | b12y5°y5y10°y10           | 3317.64 | 71.183  | 6372  | 4 | 830.17  | 0.59   |
| P0A1P6 GLNA_SALTY Glutamine synthetase | 28 |                       | NKIHPEAMDK                     | 384 | 11 | 5  | 30.2  | b7b9b10°b10y4             | 1239.61 | 59.784  | 2223  | 2 | 620.31  | -1.08  |
| P0A1P6 GLNA_SALTY Glutamine synthetase | 29 | Phosphoryl STY(13)    | AGGVFTDEAIDAYIALR              | 430 | 17 | 5  | 32    | b3b7b10b12y6              | 1861.87 | 51.465  | 8048  | 2 | 931.44  | 4.26   |
| P0A1P6 GLNA_SALTY Glutamine synthetase | 30 | Phosphoryl STY(26)    | GINESDMVLPDASTAVIDPFFADSTLIIR  | 59  | 30 | 5  | 21.33 | b9y3y6y8_H3PO4 y8y9       | 3318.59 | 46.749  | 8010  | 4 | 830.40  | 8.53   |

|                                             |    |                      |                                      |     |    |    |       |                                |         |         |        |   |         |        |
|---------------------------------------------|----|----------------------|--------------------------------------|-----|----|----|-------|--------------------------------|---------|---------|--------|---|---------|--------|
| P0A1P6 GLNA_SALTY Glutamine synthetase      | 31 | Phosphoryl STY(7)    | GKEQHVTIPAHQVNAEFFEEGK               | 26  | 22 | 3  | 20.08 | b5b6y7                         | 2575.19 | 49.677  | 4281   | 3 | 859.07  | 2.28   |
| P0A1P6 GLNA_SALTY Glutamine synthetase      | 32 |                      | ANPTTNSYKR                           | 312 | 10 | 2  | 7.53  | b9°b9                          | 1151.58 | 43.456  | 5150   | 2 | 576.29  | -2.65  |
| P0A1P6 GLNA_SALTY Glutamine synthetase      | 33 |                      | NALANPTTNSYKR                        | 309 | 13 | 0  | 6.28  |                                | 1449.75 | 43.423  | 3486   | 2 | 725.38  | 1.85   |
| P0A1P6 GLNA_SALTY Glutamine synthetase      | 34 |                      | GSLEEALNALDLDR                       | 412 | 14 | 2  | 20.46 | b4b5                           | 1515.75 | 96.494  | 3024   | 2 | 758.38  | -7.09  |
| P0A1P6 GLNA_SALTY Glutamine synthetase      | 35 |                      | YAGLSEQALY                           | 287 | 10 | 0  | 7.54  |                                | 1114.55 | 68.854  | 1681   | 1 | 1114.55 | 8.87   |
| P0A1P6 GLNA_SALTY Glutamine synthetase      | 36 |                      | ADEIQIYK                             | 232 | 8  | 0  | 1.88  |                                | 961.49  | 48.754  | 2677   | 2 | 481.25  | -0.83  |
| Q7CPE2 ATPB_SALTY ATP synthase subunit beta | 1  |                      | QLDPLVVGQEHYDTAR                     | 343 | 16 | 9  | 70.89 | y4°y4y5y8y9y10°y10y13y14       | 1840.90 | 58.519  | 50920  | 3 | 614.31  | -9.81  |
| Q7CPE2 ATPB_SALTY ATP synthase subunit beta | 2  |                      | FLSQPFFVAEVFTGSPGK                   | 399 | 18 | 4  | 16.78 | b3b10y3y7                      | 1958.02 | 100.545 | 29041  | 2 | 979.51  | 8.42   |
| Q7CPE2 ATPB_SALTY ATP synthase subunit beta | 3  |                      | QIASLGIYPDVDLSTSR                    | 324 | 19 | 10 | 52.85 | b9b12y4y7°y7y11y13y14y15y19    | 2003.06 | 81.094  | 26110  | 2 | 1002.03 | 5.42   |
| Q7CPE2 ATPB_SALTY ATP synthase subunit beta | 4  |                      | NIAIEHSGYSVFAGVGER                   | 165 | 18 | 3  | 12.58 | b8y5y11                        | 1905.94 | 58.238  | 22650  | 2 | 953.48  | -0.45  |
| Q7CPE2 ATPB_SALTY ATP synthase subunit beta | 5  |                      | MPSAVGYQPTLAEEMGVLQER                | 261 | 21 | 12 | 40.4  | b3°b3b11b21y3°y3y4y6y7y9°y9y21 | 2306.13 | 82.247  | 19243  | 2 | 1153.57 | 7.83   |
| Q7CPE2 ATPB_SALTY ATP synthase subunit beta | 6  |                      | TVNMMELIR                            | 156 | 9  | 10 | 50.99 | b2b3b4y1y3y6y7°y7*y7y9         | 1106.56 | 76.752  | 16891  | 2 | 553.78  | -8.27  |
| Q7CPE2 ATPB_SALTY ATP synthase subunit beta | 7  |                      | IMNVLGEPVDMK                         | 87  | 12 | 5  | 25.14 | y2y6°y6y8y9                    | 1345.67 | 32.965  | 12169  | 3 | 449.23  | -11.88 |
| Q7CPE2 ATPB_SALTY ATP synthase subunit beta | 8  |                      | TIAMGSSDGLRR                         | 53  | 12 | 5  | 21.92 | b11b12y2y6y7                   | 1263.64 | 54.272  | 7160   | 2 | 632.32  | -5.22  |
| Q7CPE2 ATPB_SALTY ATP synthase subunit beta | 9  |                      | TREGNDFYHEMTDSNVIDK                  | 183 | 19 | 10 | 47.75 | b4°b4b5°b5y8°y8y9y11y12y19     | 2271.03 | 68.959  | 5906   | 3 | 757.68  | 13.98  |
| Q7CPE2 ATPB_SALTY ATP synthase subunit beta | 10 |                      | FRDEGRDVLLFVDNIYR                    | 230 | 17 | 7  | 33.83 | b3b4y4y5y7°y7y17               | 2127.08 | 96.407  | 4630   | 2 | 1064.04 | -10.90 |
| Q7CPE2 ATPB_SALTY ATP synthase subunit beta | 11 |                      | TIAMGSSDGLR                          | 53  | 11 | 3  | 19.74 | b10y8y10                       | 1107.53 | 112.650 | 1835   | 1 | 1107.53 | -14.00 |
| Q7CPE2 ATPB_SALTY ATP synthase subunit beta | 12 |                      | VALTGLTMAEK                          | 219 | 11 | 8  | 69.52 | b8b10y4y5y6°y6y7y9             | 1133.61 | 59.767  | 65654  | 2 | 567.31  | -8.29  |
| Q7CPE2 ATPB_SALTY ATP synthase subunit beta | 13 |                      | VSLVYGQMNEPPGNR                      | 202 | 15 | 3  | 14.47 | b14y4y9                        | 1660.80 | 54.778  | 39804  | 2 | 830.90  | -6.32  |
| Q7CPE2 ATPB_SALTY ATP synthase subunit beta | 14 |                      | AAPSYEELSNSQELLETGIK                 | 112 | 20 | 4  | 27.48 | y5y12y15y17                    | 2179.09 | 74.287  | 34991  | 2 | 1090.05 | 6.72   |
| Q7CPE2 ATPB_SALTY ATP synthase subunit beta | 15 |                      | GIMEGEYDHLPEQAFYMVGSIDE AVEK         | 429 | 27 | 6  | 16.28 | b5b24y6°y6y11y13               | 3057.45 | 93.247  | 26697  | 3 | 1019.82 | 22.60  |
| Q7CPE2 ATPB_SALTY ATP synthase subunit beta | 16 |                      | VYDALEVQNGNEK                        | 25  | 13 | 6  | 27.99 | b6y5y7°y7*y7y10                | 1478.74 | 40.619  | 24596  | 3 | 493.59  | 20.14  |
| Q7CPE2 ATPB_SALTY ATP synthase subunit beta | 17 |                      | YQELK                                | 367 | 5  | 1  | 11.25 | b4                             | 680.36  | 31.483  | 8288   | 1 | 680.36  | -5.56  |
| Q7CPE2 ATPB_SALTY ATP synthase subunit beta | 18 | Carbamidomethyl+C(6) | VIDLMCPFAK                           | 132 | 10 | 6  | 64.63 | b3b5b7b8y4y5                   | 1193.60 | 38.084  | 2119   | 2 | 597.30  | -2.66  |
| Q7CPE2 ATPB_SALTY ATP synthase subunit beta | 19 |                      | GEIGEER                              | 99  | 8  | 3  | 30.87 | b3b5y6                         | 918.43  | 102.154 | 1557   | 1 | 918.43  | 17.21  |
| Q7CPE2 ATPB_SALTY ATP synthase subunit beta | 20 |                      | DEGRDVLLFVDNIYR                      | 232 | 15 | 4  | 23.8  | b8y4y6y7                       | 1823.95 | 100.243 | 303507 | 2 | 912.48  | 12.85  |
| Q7CPE2 ATPB_SALTY ATP synthase subunit beta | 21 |                      | TIAMGSSDGLRR                         | 53  | 12 | 3  | 17.94 | b6b10y10                       | 1263.65 | 38.184  | 27638  | 2 | 632.33  | 4.54   |
| Q7CPE2 ATPB_SALTY ATP synthase subunit beta | 22 |                      | YTLAGTEVSALLGRMPSAVGYQP TLAEEMGVLQER | 247 | 35 | 6  | 11.73 | b9°b9b11°b11y10°y10            | 3737.86 | 136.206 | 15575  | 3 | 1246.62 | -8.49  |
| Q7CPE2 ATPB_SALTY ATP synthase subunit beta | 23 |                      | ATLGRIMNVLGEPVDMK                    | 82  | 17 | 3  | 13.09 | b5y3y10                        | 1843.96 | 87.582  | 6634   | 2 | 922.48  | -11.85 |

|                                                           |    |                                      |                                   |     |    |    |       |                                        |         |         |       |   |         |        |
|-----------------------------------------------------------|----|--------------------------------------|-----------------------------------|-----|----|----|-------|----------------------------------------|---------|---------|-------|---|---------|--------|
| Q7CPE2 ATPB_SALTY ATP synthase subunit beta               | 24 | Carbamidomethyl+C(6)                 | VIDLMCPFAKGGK                     | 132 | 13 | 6  | 33.29 | b8b9°b9b12y9y11                        | 1435.74 | 68.954  | 3798  | 2 | 718.37  | -1.53  |
| Q7CPE2 ATPB_SALTY ATP synthase subunit beta               | 25 |                                      | IMNVLGEPVDMKGEIGEEER              | 87  | 20 | 4  | 18.1  | b7y6y10y12                             | 2245.09 | 70.711  | 3538  | 3 | 749.04  | 3.37   |
| Q7CPE2 ATPB_SALTY ATP synthase subunit beta               | 26 |                                      | DLEHPIEVPVGKATLGR                 | 70  | 17 | 6  | 20.96 | b3°b3b5b9y4°y4                         | 1831.01 | 32.906  | 2405  | 4 | 458.51  | 2.80   |
| Q7CPE2 ATPB_SALTY ATP synthase subunit beta               | 27 | Carbamidomethyl+C(6); Oxidation+M(5) | VIDLMCPFAK                        | 132 | 10 | 4  | 36.38 | b7y5y6y7                               | 1209.59 | 60.632  | 6666  | 2 | 605.30  | -12.41 |
| Q7CPE2 ATPB_SALTY ATP synthase subunit beta               | 28 | Oxidation+M(4)                       | TIAMGSSDGLR                       | 53  | 11 | 4  | 26.73 | y7y9y10°y10                            | 1123.55 | 46.773  | 5619  | 2 | 562.28  | 10.32  |
| Q7CPE2 ATPB_SALTY ATP synthase subunit beta               | 29 | Oxidation+M(2)                       | IMNVLGEPVDMK                      | 87  | 12 | 3  | 17.94 | b4b10y6                                | 1361.67 | 89.732  | 1504  | 2 | 681.34  | -11.03 |
| Q7CPE2 ATPB_SALTY ATP synthase subunit beta               | 30 |                                      | PSAVGYQPTLAEEMGVLQER              | 262 | 20 | 4  | 21.2  | b3°b3b4b15                             | 2175.07 | 82.266  | 2054  | 3 | 725.70  | -2.13  |
| P65215 KDSA_SALTY 2-dehydro-3-deoxyphohooctonate aldolase | 1  |                                      | VITDVHEASQAQPVADVVDVIQL PAFLAR    | 91  | 29 | 6  | 12.01 | b8b12*b12y2y6y14                       | 3101.67 | 105.280 | 27730 | 3 | 1034.56 | 2.52   |
| P65215 KDSA_SALTY 2-dehydro-3-deoxyphohooctonate aldolase | 2  |                                      | SSIHYSYR                          | 63  | 7  | 4  | 32    | b4y3y4y7                               | 849.43  | 52.651  | 19906 | 1 | 849.43  | 10.20  |
| P65215 KDSA_SALTY 2-dehydro-3-deoxyphohooctonate aldolase | 3  |                                      | AGMAVGLAGLFLESHDPANAK             | 226 | 22 | 6  | 27.01 | b6b9y5y7y12y13                         | 2166.08 | 89.046  | 19161 | 3 | 722.70  | -9.13  |
| P65215 KDSA_SALTY 2-dehydro-3-deoxyphohooctonate aldolase | 4  |                                      | VANDLPFVLFGGMNVLESR               | 12  | 19 | 15 | 92.06 | b1b8y2°y2y3y4y5y7y8y10°y10y11y13y14y19 | 2078.08 | 110.883 | 16846 | 2 | 1039.54 | 2.47   |
| P65215 KDSA_SALTY 2-dehydro-3-deoxyphohooctonate aldolase | 5  | Carbamidomethyl+C(17)                | VSGNSPVIFDVTHALQCR                | 189 | 18 | 5  | 12.58 | b1b5b13*b13y10                         | 1999.98 | 80.234  | 7641  | 3 | 667.33  | -10.31 |
| P65215 KDSA_SALTY 2-dehydro-3-deoxyphohooctonate aldolase | 6  | Carbamidomethyl+C(17)                | VSGNSPVIFDVTHALQCRDPFGAA SGGRR    | 189 | 28 | 4  | 10.94 | b7*b7y7y13                             | 2915.41 | 86.422  | 4649  | 4 | 729.61  | -4.27  |
| P65215 KDSA_SALTY 2-dehydro-3-deoxyphohooctonate aldolase | 7  | Carbamidomethyl+C(2)                 | ICEHYVTVTQK                       | 36  | 11 | 6  | 30.2  | b7b9°b9b10y8*y8                        | 1377.70 | 46.783  | 27952 | 3 | 459.90  | 9.66   |
| P65215 KDSA_SALTY 2-dehydro-3-deoxyphohooctonate aldolase | 8  |                                      | GQVTELAR                          | 218 | 8  | 9  | 69.39 | b3b4°b4*b4b6y3y4°y4y6                  | 873.47  | 32.868  | 11489 | 2 | 437.24  | -14.05 |
| P65215 KDSA_SALTY 2-dehydro-3-deoxyphohooctonate aldolase | 9  |                                      | ASFDK                             | 55  | 5  | 1  | 11.25 | b4                                     | 567.27  | 49.657  | 11259 | 1 | 567.27  | -11.40 |
| P65215 KDSA_SALTY 2-dehydro-3-deoxyphohooctonate aldolase | 10 |                                      | DLAMR                             | 31  | 5  | 2  | 22.5  | b3y3                                   | 605.31  | 47.806  | 8482  | 1 | 605.31  | -2.12  |
| P65215 KDSA_SALTY 2-dehydro-3-deoxyphohooctonate aldolase | 11 |                                      | QTDLVEAMAK                        | 120 | 10 | 7  | 49.4  | b5b6b7b9°b9y9°y9                       | 1105.58 | 51.306  | 6836  | 2 | 553.29  | 18.88  |
| P65215 KDSA_SALTY 2-dehydro-3-deoxyphohooctonate aldolase | 12 |                                      | GANFGYDNLVVDMLGFSVMK              | 168 | 20 | 4  | 15.24 | b5b12y6y13                             | 2177.03 | 103.085 | 4798  | 3 | 726.35  | -3.36  |
| P65215 KDSA_SALTY 2-dehydro-3-deoxyphohooctonate aldolase | 13 |                                      | GPGLEEGMK                         | 70  | 9  | 3  | 25.47 | b3b6y5                                 | 917.45  | 53.477  | 2564  | 2 | 459.23  | 9.18   |
| P65215 KDSA_SALTY 2-dehydro-3-deoxyphohooctonate aldolase | 14 |                                      | DPFGAASGGR                        | 207 | 10 | 3  | 29.11 | b4b6b7                                 | 934.45  | 67.024  | 2377  | 1 | 934.45  | 13.52  |
| P65215 KDSA_SALTY 2-dehydro-3-deoxyphohooctonate aldolase | 15 |                                      | GQVTELARAGMAVGLAGLFLESH PDPANAK   | 218 | 30 | 3  | 11.06 | b7y7y14                                | 3020.57 | 87.057  | 75212 | 3 | 1007.53 | 3.31   |
| P65215 KDSA_SALTY 2-dehydro-3-deoxyphohooctonate aldolase | 16 | Carbamidomethyl+C(23)                | AGMAVGLAGLFLESHDPANAKC DGPSALPLAK | 226 | 33 | 3  | 23.21 | b4b5b9                                 | 3275.63 | 90.441  | 14366 | 4 | 819.66  | -6.78  |
| P65215 KDSA_SALTY 2-dehydro-3-deoxyphohooctonate aldolase | 17 | Carbamidomethyl+C(4)                 | VILCDRGANFGYDNLVVDMLGFS VMK       | 162 | 26 | 3  | 10.93 | b11y10y16                              | 2933.43 | 57.577  | 13250 | 5 | 587.49  | -3.33  |
| P65215 KDSA_SALTY 2-dehydro-3-deoxyphohooctonate aldolase | 18 |                                      | ANRSSIHYSYR                       | 60  | 10 | 8  | 62.86 | b3b4b7*b7b9y5°y5y9                     | 1190.59 | 41.678  | 3858  | 3 | 397.53  | -12.41 |
| P65215 KDSA_SALTY 2-dehydro-3-deoxyphohooctonate aldolase | 19 | Oxidation+M(8)                       | GPGLEEGMK                         | 70  | 9  | 4  | 25.47 | b4b7y6°y6                              | 933.43  | 71.305  | 23226 | 2 | 467.22  | -4.05  |
| P65215 KDSA_SALTY 2-dehydro-3-deoxyphohooctonate aldolase | 20 | Oxidation+M(8)                       | QTDLVEAMAK                        | 120 | 10 | 5  | 49.4  | b3y4y5y6y7                             | 1121.56 | 49.601  | 5708  | 2 | 561.28  | 7.29   |
| P65215 KDSA_SALTY 2-dehydro-3-deoxyphohooctonate aldolase | 21 | Oxidation+M(3)                       | AGMAVGLAGLFLESHDPANAK             | 226 | 22 | 4  | 20.08 | b10y9°y9y10                            | 2182.08 | 73.540  | 3108  | 3 | 728.03  | -9.62  |
| Q8ZRP4 DAPD_SALTY 2                                       | 1  |                                      | EAVNQVISLLDSGALR                  | 28  | 16 | 8  | 42.16 | b6*b6b7y3y6y9y10y16                    | 1684.93 | 92.969  | 60097 | 2 | 842.97  | 5.22   |

|                                           |    |                      |                            |     |    |    |        |                                          |         |        |        |   |         |        |
|-------------------------------------------|----|----------------------|----------------------------|-----|----|----|--------|------------------------------------------|---------|--------|--------|---|---------|--------|
| Q8ZRP4 DAPD_SALTY 2                       | 2  |                      | INDNQVIDGAESR              | 68  | 13 | 15 | 74.24  | b1b3b8b9y7°y7y8y9°y9*y9y10*y10y11°y11y13 | 1430.69 | 41.680 | 22556  | 2 | 715.85  | 0.68   |
| Q8ZRP4 DAPD_SALTY 2                       | 3  |                      | MQQLQNVIETAFER             | 0   | 14 | 4  | 20.83  | b4*b4y7y8                                | 1706.85 | 31.956 | 31381  | 3 | 569.62  | -4.36  |
| Q8ZRP4 DAPD_SALTY 2                       | 4  |                      | IDGQWVTHQWLK               | 48  | 12 | 5  | 41.41  | b3b6b9b10y8                              | 1510.75 | 70.031 | 3505   | 3 | 504.26  | -18.10 |
| Q8ZRP4 DAPD_SALTY 2                       | 5  |                      | AVLLSFR                    | 61  | 7  | 3  | 35.01  | y3y4y5                                   | 805.48  | 67.024 | 3398   | 2 | 403.24  | -21.90 |
| Q8ZRP4 DAPD_SALTY 2                       | 6  |                      | MQQLQNVIETAFERR            | 0   | 15 | 4  | 14.47  | b4b10°b10y6                              | 1862.93 | 66.281 | 7714   | 3 | 621.65  | -13.11 |
| Q8ZRP4 DAPD_SALTY 2                       | 7  |                      | EAVNQVISLLDSGALRVAEK       | 28  | 20 | 8  | 24.15  | b3b7*b7y3°y3y4°y4y11                     | 2112.16 | 46.039 | 6349   | 5 | 423.24  | -1.73  |
| Q8ZRP4 DAPD_SALTY 2                       | 8  |                      | IYDRETGEVHYGR              | 213 | 13 | 9  | 80.72  | b3b4b6b11b12y4y5y10y12                   | 1594.77 | 69.022 | 3255   | 3 | 532.26  | 8.11   |
| Q8ZRP4 DAPD_SALTY 2                       | 9  | Phosphoryl STY(13)   | SEVVEGVVIEEGSVISMGVYLGQSTK | 187 | 26 | 8  | 23.05  | b3b13y5y10*y10y12y14_HPO3y14°y14         | 2776.35 | 74.184 | 16099  | 4 | 694.84  | 7.12   |
| P60446 RL3_SALTY 50S ribosomal protein L3 | 1  |                      | VTVQSLDVVR                 | 169 | 10 | 7  | 59.4   | y3y5y6y7y8y9*y10                         | 1115.63 | 56.965 | 122792 | 2 | 558.32  | -9.96  |
| P60446 RL3_SALTY 50S ribosomal protein L3 | 2  |                      | IFTEDGVSSIPVTVIEVEANR      | 13  | 20 | 10 | 32.71  | b2b7y1y4°y4y5y6°y6y13y20                 | 2188.16 | 88.819 | 60015  | 2 | 1094.58 | 5.58   |
| P60446 RL3_SALTY 50S ribosomal protein L3 | 3  |                      | TQDATHGNSLSHR              | 128 | 13 | 14 | 67.25  | b1b4°b4*b4b10b11b12y2y4y5y7°y7*y7y10     | 1423.69 | 45.968 | 16791  | 3 | 475.23  | 14.23  |
| P60446 RL3_SALTY 50S ribosomal protein L3 | 4  |                      | MAGQMGNER                  | 160 | 9  | 11 | 68.26  | b2b4b5y1y2y4y5°y5y7y8y9                  | 993.43  | 21.355 | 13938  | 2 | 497.22  | 2.95   |
| P60446 RL3_SALTY 50S ribosomal protein L3 | 5  |                      | GLWEFR                     | 77  | 6  | 6  | 45.63  | b4°b4b5°b5y4y5                           | 807.42  | 46.751 | 36675  | 2 | 404.21  | 8.69   |
| P60446 RL3_SALTY 50S ribosomal protein L3 | 6  | Carbamidomethyl+C(9) | GGVPGATGCDLIVKPAVK         | 190 | 18 | 3  | 12.58  | b15y4y15                                 | 1738.92 | 54.505 | 34897  | 3 | 580.31  | -16.01 |
| P60446 RL3_SALTY 50S ribosomal protein L3 | 7  |                      | NLLLVK                     | 184 | 6  | 2  | 23.13  | y3y4                                     | 699.48  | 57.485 | 16254  | 1 | 699.48  | -0.61  |
| P60446 RL3_SALTY 50S ribosomal protein L3 | 8  |                      | VTKPEAGHFAK                | 59  | 11 | 8  | 47.47  | b8°b8y4y5y7°y7y10°y10                    | 1184.62 | 46.765 | 12082  | 2 | 592.81  | -20.20 |
| P60446 RL3_SALTY 50S ribosomal protein L3 | 9  |                      | AVQVTTGAK                  | 46  | 9  | 7  | 52.75  | b3*b3y4y5y6y7*y7                         | 874.48  | 22.366 | 7775   | 2 | 437.75  | -18.01 |
| P60446 RL3_SALTY 50S ribosomal protein L3 | 10 |                      | VPGSIGQNQTPGK              | 141 | 13 | 5  | 26.23  | b4°b4b6b7y11                             | 1282.65 | 54.305 | 3232   | 3 | 428.22  | -21.13 |
| P60446 RL3_SALTY 50S ribosomal protein L3 | 11 |                      | LAEGEEYTVGQSSISVELFADVK    | 83  | 22 | 4  | 11.33  | b4°b4b11y11                              | 2384.16 | 89.547 | 2162   | 2 | 1192.59 | -9.63  |
| P60446 RL3_SALTY 50S ribosomal protein L3 | 12 |                      | DLANDGYR                   | 38  | 8  | 9  | 83.65  | b5b6b7y3y4°y4y6y7°y7                     | 923.43  | 32.851 | 1838   | 1 | 923.43  | 8.72   |
| P60446 RL3_SALTY 50S ribosomal protein L3 | 13 | Carbamidomethyl+C(9) | GGVPGATGCDLIVKPAVKA        | 190 | 19 | 9  | 48.35  | b4b5b7°b7y3y5y6y8y12                     | 1809.96 | 56.748 | 115765 | 3 | 603.99  | -13.42 |
| P60446 RL3_SALTY 50S ribosomal protein L3 | 14 |                      | IFTEDGVSSIPVTVIEVEANRVTQVK | 13  | 25 | 6  | 17.37  | b5b7°b7b11y16y18                         | 2743.49 | 95.774 | 69645  | 3 | 915.17  | 0.27   |
| P60446 RL3_SALTY 50S ribosomal protein L3 | 15 |                      | TQDATHGNSLSHRVPGSIGQNQTPGK | 128 | 26 | 4  | 21.6   | y7y10*y10y11                             | 2687.31 | 55.132 | 34366  | 4 | 672.58  | -4.54  |
| P60446 RL3_SALTY 50S ribosomal protein L3 | 16 |                      | AGVEAGRGLWEFR              | 70  | 13 | 6  | 33.29  | b4b11y4y11y12°y12                        | 1447.73 | 60.528 | 20298  | 2 | 724.37  | -7.00  |
| P60446 RL3_SALTY 50S ribosomal protein L3 | 17 |                      | WNFRTQDATHGNSLSHR          | 124 | 17 | 4  | 13.09  | b4b11y3°y3                               | 2026.95 | 95.495 | 4598   | 2 | 1013.98 | -6.56  |
| P60446 RL3_SALTY 50S ribosomal protein L3 | 18 |                      | KMAGQMGNER                 | 159 | 10 | 5  | 45.59  | b4b5y4y5y8                               | 1121.52 | 18.285 | 2475   | 2 | 561.26  | -1.09  |
| Q56073 DNAK_SALTY Chaperone protein dnaK  | 1  |                      | IINEPTAAALAYGLDKEVGNR      | 167 | 21 | 13 | 102.35 | b2y1y3y5y6y7y9y10y11y14y17y19y21         | 2215.15 | 75.650 | 44968  | 3 | 739.06  | -8.05  |
| Q56073 DNAK_SALTY Chaperone protein dnaK  | 2  |                      | ASSGLNEEEIQK               | 502 | 12 | 13 | 41.41  | b1b2°b2b11y1y5y6°y7°y7y8y9°y9y12         | 1304.63 | 35.208 | 20426  | 2 | 652.82  | -4.77  |
| Q56073 DNAK_SALTY Chaperone protein dnaK  | 3  |                      | TAEDYLGEVPTEAVITVPAYFNDAQR | 125 | 26 | 10 | 40.24  | b3b6b14°b14y3y4y8y9y12y26                | 2869.40 | 94.181 | 19794  | 3 | 957.14  | 4.68   |
| Q56073 DNAK_SALTY Chaperone protein dnaK  | 4  |                      | QAVTNPQNTLFAIKR            | 56  | 15 | 6  | 31.07  | b2b3b5b8°b8b9                            | 1700.96 | 72.840 | 16140  | 2 | 850.99  | 11.34  |
| Q56073 DNAK_SALTY Chaperone protein dnaK  | 5  |                      | QVEEAGDK                   | 548 | 8  | 3  | 24.39  | y4°y4y7                                  | 875.42  | 38.124 | 8459   | 2 | 438.21  | 8.44   |

|                                           |    |                    |                                      |     |    |    |       |                                             |         |         |       |   |         |        |
|-------------------------------------------|----|--------------------|--------------------------------------|-----|----|----|-------|---------------------------------------------|---------|---------|-------|---|---------|--------|
| IQ56073 DNAK_SALTY Chaperone protein dnaK | 6  |                    | TTPSIIAYTQDGETLVGQPAKR               | 34  | 22 | 7  | 21.21 | b2b3°b3b4b13°b13y2                          | 2346.25 | 68.994  | 6260  | 3 | 782.75  | 7.60   |
| IQ56073 DNAK_SALTY Chaperone protein dnaK | 7  |                    | QATKDAGR                             | 151 | 8  | 5  | 27.86 | b5°b5b6°b6y5                                | 846.43  | 86.319  | 5900  | 1 | 846.43  | -11.10 |
| IQ56073 DNAK_SALTY Chaperone protein dnaK | 8  |                    | MVRDAEANAESDR                        | 514 | 13 | 3  | 16.52 | b4b11y9                                     | 1463.66 | 67.056  | 5475  | 2 | 732.33  | 1.17   |
| IQ56073 DNAK_SALTY Chaperone protein dnaK | 9  |                    | FQDEEVQR                             | 76  | 8  | 6  | 42.12 | b4y3y4°y4y7y8                               | 1050.47 | 28.985  | 4825  | 2 | 525.74  | -9.88  |
| IQ56073 DNAK_SALTY Chaperone protein dnaK | 10 |                    | VLENAEGDR                            | 25  | 9  | 7  | 25.47 | b2b4°b4°b4b6b9y7                            | 1002.49 | 23.597  | 3906  | 2 | 501.75  | 8.22   |
| IQ56073 DNAK_SALTY Chaperone protein dnaK | 11 |                    | LMEIAQQQHAQQAGSADASAN NAK            | 597 | 25 | 4  | 15.44 | b3b9b14y8                                   | 2610.26 | 101.632 | 2068  | 4 | 653.32  | 10.48  |
| IQ56073 DNAK_SALTY Chaperone protein dnaK | 12 |                    | TTPSIIAYTQDGETLVGQPAK                | 34  | 21 | 3  | 20    | b12y12y13                                   | 2190.12 | 93.531  | 1595  | 2 | 1095.56 | -3.68  |
| IQ56073 DNAK_SALTY Chaperone protein dnaK | 13 |                    | IIGADNGDAWLDVK                       | 92  | 14 | 3  | 15.39 | b8b13y9                                     | 1486.76 | 71.015  | 12782 | 2 | 743.88  | 3.28   |
| IQ56073 DNAK_SALTY Chaperone protein dnaK | 14 |                    | GMPQIEVTFDIDADGILHVS AK              | 467 | 22 | 10 | 42.4  | b4b5b7b8°b8b10b13°b13°b13y13                | 2356.14 | 95.421  | 11329 | 4 | 589.79  | -18.55 |
| IQ56073 DNAK_SALTY Chaperone protein dnaK | 15 |                    | LPADDK                               | 556 | 6  | 3  | 34.38 | b3y3y4                                      | 658.34  | 46.776  | 11090 | 1 | 658.34  | -0.19  |
| IQ56073 DNAK_SALTY Chaperone protein dnaK | 16 |                    | SLGQFNLDGINPAPR                      | 452 | 15 | 4  | 14.47 | b5°b5b14y11                                 | 1598.83 | 85.524  | 10969 | 2 | 799.92  | -0.92  |
| IQ56073 DNAK_SALTY Chaperone protein dnaK | 17 |                    | NQGDHLLHSTR                          | 536 | 11 | 5  | 28.77 | b4b9y4y8°y8                                 | 1277.63 | 42.502  | 4971  | 2 | 639.32  | -4.20  |
| IQ56073 DNAK_SALTY Chaperone protein dnaK | 18 |                    | TIAVYDLGGGTFDISIIEIDVDGE K           | 188 | 26 | 4  | 22.39 | b9b22y3y4                                   | 2769.38 | 99.360  | 3784  | 3 | 923.80  | 2.03   |
| IQ56073 DNAK_SALTY Chaperone protein dnaK | 19 |                    | MQELAQVSQK                           | 587 | 10 | 3  | 22.12 | b4b7y9                                      | 1161.62 | 74.894  | 2822  | 2 | 581.31  | 19.02  |
| IQ56073 DNAK_SALTY Chaperone protein dnaK | 20 |                    | FEELVQTR                             | 528 | 8  | 5  | 42.12 | b4b6b7y7°y7                                 | 1021.51 | 42.450  | 2643  | 2 | 511.26  | -17.92 |
| IQ56073 DNAK_SALTY Chaperone protein dnaK | 21 |                    | MPMVQK                               | 345 | 6  | 2  | 23.13 | b4y5                                        | 733.37  | 30.177  | 2405  | 1 | 733.37  | -0.33  |
| IQ56073 DNAK_SALTY Chaperone protein dnaK | 22 |                    | IELSSAQQTVDNLPYITADATGPK             | 270 | 24 | 4  | 11.05 | b9y6°y6y11                                  | 2532.34 | 109.435 | 1919  | 3 | 844.78  | 20.92  |
| IQ56073 DNAK_SALTY Chaperone protein dnaK | 23 |                    | KDVNPDEAVAIGA AVQGGVLTG DVK          | 362 | 25 | 3  | 10.97 | b11b15y7                                    | 2423.29 | 78.818  | 41268 | 3 | 808.44  | 6.35   |
| IQ56073 DNAK_SALTY Chaperone protein dnaK | 24 |                    | QATKDAGR                             | 151 | 8  | 3  | 27.86 | b6y6y7                                      | 846.44  | 45.304  | 39197 | 2 | 423.72  | -8.08  |
| IQ56073 DNAK_SALTY Chaperone protein dnaK | 25 |                    | VLENAEGDR TTPSIIAYTQDGETLVGQPAK      | 25  | 30 | 8  | 21.33 | b6°b6°b6b9b10b14y13°y13                     | 3173.60 | 71.265  | 6018  | 3 | 1058.54 | 1.46   |
| IQ56073 DNAK_SALTY Chaperone protein dnaK | 26 |                    | MQELAQVSQKLMEIAQQQHAQQ QAGSADASANNAK | 587 | 35 | 4  | 11.73 | b10b12y14°y14                               | 3752.82 | 118.573 | 5477  | 4 | 938.96  | 3.32   |
| IQ56073 DNAK_SALTY Chaperone protein dnaK | 27 |                    | IIGADNGDAWLDVKGQK                    | 92  | 17 | 5  | 32.59 | b3b6b13y12y13                               | 1799.93 | 136.312 | 2741  | 2 | 900.47  | 1.97   |
| IQ56073 DNAK_SALTY Chaperone protein dnaK | 28 |                    | ITIKASSGLNEEEIQK                     | 498 | 16 | 3  | 22.09 | y6y7y9                                      | 1759.92 | 100.553 | 2613  | 2 | 880.46  | -12.14 |
| IQ56073 DNAK_SALTY Chaperone protein dnaK | 29 |                    | ASDNKSLGQFNLDGINPAPR                 | 447 | 20 | 7  | 32.71 | b5°b5b8b9b10°b10y11                         | 2114.05 | 69.991  | 2012  | 3 | 705.36  | -4.85  |
| IQ56073 DNAK_SALTY Chaperone protein dnaK | 30 | Phosphoryl STY(12) | IINEPTAAALAYGLDK                     | 167 | 16 | 3  | 20.25 | b13_H3PO4 b12b13y4                          | 1739.86 | 68.505  | 13748 | 3 | 580.63  | 5.61   |
| IQ56073 DNAK_SALTY Chaperone protein dnaK | 31 | Phosphoryl STY(15) | IELSSAQQTVDNLPYITADATGPK             | 270 | 24 | 12 | 54.91 | b7b8°b8y7°y7y8°y8y11y12°y12y13_HPO3 y13°y13 | 2612.23 | 60.548  | 5811  | 3 | 871.42  | -3.18  |
| IQ56073 DNAK_SALTY Chaperone protein dnaK | 32 | Phosphoryl STY(14) | TTPSIIAYTQDGETLVGQPAK                | 34  | 21 | 6  | 28.93 | b3b13b18y8°y8y9                             | 2270.11 | 74.193  | 4658  | 2 | 1135.56 | 12.58  |
| IQ56073 DNAK_SALTY Chaperone protein dnaK | 33 | Phosphoryl STY(7)  | MAPPQISAEVLK                         | 109 | 12 | 7  | 41.9  | b4b5b6°b6y8y10°y10                          | 1363.66 | 46.825  | 2326  | 2 | 682.33  | -0.45  |
| IQ56073 DNAK_SALTY Chaperone protein dnaK | 34 | Oxidation+M(2)     | GMPQIEVTFDIDADGILHVS AK              | 467 | 22 | 9  | 39.54 | b5b6°b6b9b12b17y5y11y13                     | 2372.21 | 102.632 | 4467  | 3 | 791.41  | 11.73  |



|                                                           |    |                       |                                     |     |    |    |       |                               |         |         |       |   |         |        |
|-----------------------------------------------------------|----|-----------------------|-------------------------------------|-----|----|----|-------|-------------------------------|---------|---------|-------|---|---------|--------|
| Q56073 DNAK_SALTY Chaperone protein dnaK                  | 35 |                       | VLENAEGDR                           | 25  | 9  | 0  | 2.51  |                               | 985.46  | 23.523  | 16080 | 2 | 493.24  | 10.53  |
| Q8ZRE7 YAIE_SALTY UPF0345 protein yaiE                    | 1  |                       | MLQSNEYFSGK                         | 0   | 11 | 6  | 22.75 | b9b10°b10y1y4y11              | 1303.60 | 50.053  | 25918 | 2 | 652.30  | -2.34  |
| Q8ZRE7 YAIE_SALTY UPF0345 protein yaiE                    | 2  |                       | VLLPGTVEWK                          | 53  | 10 | 4  | 23.88 | b3y6y7y10                     | 1141.65 | 71.600  | 22414 | 2 | 571.33  | -7.48  |
| Q8ZRE7 YAIE_SALTY UPF0345 protein yaiE                    | 3  | Carbamidomethyl+C(28) | VYTAGEVFNVPGHSEFHLQVAEP ASYLCR      | 63  | 29 | 9  | 33.87 | b3b4b5°b5y2y5°y5y11y29        | 3277.62 | 129.603 | 3101  | 4 | 820.16  | 13.04  |
| Q8ZRE7 YAIE_SALTY UPF0345 protein yaiE                    | 4  |                       | SIGFTSSSTGR                         | 13  | 11 | 6  | 30.2  | b9°b9y3y4y7°y7                | 1099.54 | 38.059  | 2659  | 2 | 550.27  | 1.89   |
| Q8ZRE7 YAIE_SALTY UPF0345 protein yaiE                    | 5  | Carbamidomethyl+C(28) | VYTAGEVFNVPGHSEFHLQVAEP ASYLCRYL    | 63  | 31 | 4  | 11.16 | b6b11°b11y11                  | 3553.75 | 117.036 | 3135  | 4 | 889.19  | 7.28   |
| P69226 IF1_SALTY Translation initiation factor IF-1       | 1  |                       | AKEDNIEMQGTVLETLPNTMFR              | 1   | 22 | 7  | 40.25 | b6b7b8b11y6y9y14              | 2537.25 | 85.347  | 51890 | 3 | 846.42  | 5.00   |
| P69226 IF1_SALTY Translation initiation factor IF-1       | 2  |                       | VELENGHVVTAHISGK                    | 23  | 16 | 5  | 12.88 | b6°b6°b6b8°b8                 | 1689.89 | 102.613 | 18573 | 2 | 845.45  | -2.96  |
| P69226 IF1_SALTY Translation initiation factor IF-1       | 3  |                       | EDNIEMQGTVLETLPNTMFR                | 3   | 20 | 4  | 11.82 | b13y3y7°y7                    | 2338.13 | 89.089  | 1921  | 2 | 1169.57 | 11.90  |
| P67093 UG_SALTY Universal stress protein G                | 1  |                       | TIIMPVDVFEMELSDK                    | 3   | 16 | 10 | 40.4  | b2b3b12°b12y6y12y13°y13y14y16 | 1866.93 | 105.276 | 75629 | 2 | 933.97  | 6.47   |
| P67093 UG_SALTY Universal stress protein G                | 2  |                       | HATLPVLVVR                          | 132 | 10 | 7  | 33.37 | b2b3°b3y2y6y8y9               | 1104.68 | 62.625  | 19472 | 2 | 552.85  | -5.08  |
| P67093 UG_SALTY Universal stress protein G                | 3  |                       | LQTMVGHFSIDPSR                      | 69  | 14 | 3  | 13.68 | y7y8°y13                      | 1587.81 | 86.350  | 3542  | 3 | 529.94  | 9.92   |
| P67093 UG_SALTY Universal stress protein G                | 4  |                       | NPSITTHLLGSNASSVVR                  | 114 | 18 | 3  | 12.58 | b5b10y10                      | 1853.00 | 62.500  | 31860 | 2 | 927.01  | 8.96   |
| P67093 UG_SALTY Universal stress protein G                | 5  |                       | FAADVR                              | 50  | 6  | 1  | 11.88 | b3                            | 678.35  | 30.099  | 7502  | 1 | 678.35  | -11.25 |
| P67093 UG_SALTY Universal stress protein G                | 6  |                       | FGSVRDVVNEMGEELDADV VVIGSR          | 89  | 25 | 4  | 10.97 | b9°b9y3y18                    | 2692.30 | 125.697 | 63154 | 3 | 898.11  | -7.71  |
| P67093 UG_SALTY Universal stress protein G                | 7  |                       | HAEFLAQQDGVIIHLHLVPGSAS MSLHRFAADVR | 22  | 34 | 3  | 17.3  | b7b11b14                      | 3722.88 | 85.857  | 11200 | 4 | 931.48  | -13.84 |
| P67093 UG_SALTY Universal stress protein G                | 8  |                       | FEEHLQHEAETRLQTMVGHFSIDPSR          | 57  | 26 | 3  | 10.93 | b6y9y13                       | 3094.48 | 103.882 | 7317  | 3 | 1032.17 | 0.79   |
| P67093 UG_SALTY Universal stress protein G                | 9  |                       | RFEHLQHEAETR                        | 56  | 13 | 6  | 28.35 | b6b7°b7y5y9°y9                | 1681.80 | 45.397  | 6950  | 3 | 561.27  | -0.07  |
| P67093 UG_SALTY Universal stress protein G                | 10 | Oxidation+M(4)        | LQTMVGHFSIDPSR                      | 69  | 14 | 6  | 31.99 | b4°b4b9b13y7y13               | 1603.81 | 60.637  | 17734 | 2 | 802.41  | 12.71  |
| P67093 UG_SALTY Universal stress protein G                | 11 | Oxidation+M(4)        | TIIMPVDVFEMELSDK                    | 3   | 16 | 5  | 27.39 | b5b11b15y6y8                  | 1882.91 | 78.200  | 4559  | 3 | 628.31  | -2.72  |
| P0A2M5 UPP_SALTY Uracil phohoribosyltransferase           | 1  |                       | VLVLVAAPEGIAALEK                    | 155 | 16 | 6  | 37.27 | b3b4b6y9y11y12                | 1592.96 | 86.656  | 43323 | 2 | 796.99  | 1.69   |
| P0A2M5 UPP_SALTY Uracil phohoribosyltransferase           | 2  |                       | AGLGMMEGVLENVPSAR                   | 78  | 17 | 9  | 43.62 | b13°b13b14y4y6y12y14°y14y17   | 1730.87 | 82.504  | 30893 | 2 | 865.94  | 7.69   |
| P0A2M5 UPP_SALTY Uracil phohoribosyltransferase           | 3  |                       | ITVVPILR                            | 70  | 8  | 4  | 35.64 | y4y5y6y8                      | 910.60  | 70.700  | 13600 | 2 | 455.80  | -11.39 |
| P0A2M5 UPP_SALTY Uracil phohoribosyltransferase           | 4  |                       | ELASEVGSLLTYEATADLETEK              | 29  | 22 | 5  | 11.33 | b1b4y2y7y10                   | 2369.19 | 66.212  | 2030  | 3 | 790.40  | 11.95  |
| P0A2M5 UPP_SALTY Uracil phohoribosyltransferase           | 5  |                       | NEETLEPVYPYFQK                      | 103 | 13 | 5  | 16.52 | b4°b4b10°b10y8                | 1593.81 | 58.364  | 9759  | 2 | 797.41  | 16.31  |
| P0A2M5 UPP_SALTY Uracil phohoribosyltransferase           | 6  | Oxidation+M()         | AGLGMMEGVLENVPSAR                   | 78  | 17 | 6  | 28.98 | b3b4b6b16°b16y8               | 1746.86 | 94.356  | 1724  | 2 | 873.93  | 3.70   |
| P0A2M5 UPP_SALTY Uracil phohoribosyltransferase           | 7  |                       | VGSLLTYEATADLETEK                   | 34  | 17 | 2  | 9.62  | b12°b12                       | 1839.94 | 66.212  | 2610  | 3 | 613.98  | 8.43   |
| P0A251 AHPC_SALTY Alkyl hydroperoxide reductase subunit C | 1  |                       | YAMIGDPTGALTR                       | 93  | 13 | 5  | 26.23 | b2b3y7y10y11                  | 1365.68 | 63.718  | 84059 | 2 | 683.35  | -0.27  |
| P0A251 AHPC_SALTY Alkyl hydroperoxide reductase subunit C | 2  |                       | ATFVVDPPQGHQAEIVTAEGIGR             | 120 | 23 | 10 | 32.7  | b2b4b6y2y4y7y8y10y12°y12      | 2384.27 | 129.439 | 55447 | 3 | 795.43  | -6.25  |

|                                                            |    |                       |                                            |     |    |    |        |                                    |         |         |        |   |         |        |
|------------------------------------------------------------|----|-----------------------|--------------------------------------------|-----|----|----|--------|------------------------------------|---------|---------|--------|---|---------|--------|
| P0A251 AHPC_SALTY Alkyl hydroperoxide reductase subunit C  | 3  |                       | LGVDVYSVSTDTHFTHK                          | 63  | 17 | 6  | 25.6   | b4b11y2y3y9y11                     | 1905.91 | 58.498  | 15680  | 3 | 635.98  | -11.34 |
| P0A251 AHPC_SALTY Alkyl hydroperoxide reductase subunit C  | 4  |                       | AWHSSSETIAK                                | 80  | 11 | 4  | 31.78  | b9b10y5y9                          | 1216.58 | 30.658  | 11275  | 3 | 406.20  | -13.24 |
| P0A251 AHPC_SALTY Alkyl hydroperoxide reductase subunit C  | 5  |                       | NFDNMREDEGLADR                             | 106 | 14 | 6  | 15.39  | b2*b2b11y5y9*y9                    | 1681.74 | 47.914  | 7875   | 2 | 841.38  | 12.48  |
| P0A251 AHPC_SALTY Alkyl hydroperoxide reductase subunit C  | 6  | Carbamidomethyl+C(15) | WSVFFFPADFTFVCPTELGDVA<br>DHYEELQK         | 32  | 31 | 6  | 20.39  | b5b11y2y6y7y11                     | 3757.74 | 119.509 | 7377   | 3 | 1253.25 | 4.29   |
| P0A251 AHPC_SALTY Alkyl hydroperoxide reductase subunit C  | 7  |                       | NGEFIEVTEKDTEGR                            | 17  | 15 | 6  | 23.8   | b2b6y4*y4y8y10                     | 1723.79 | 63.268  | 4781   | 3 | 575.27  | -14.52 |
| P0A251 AHPC_SALTY Alkyl hydroperoxide reductase subunit C  | 8  |                       | ATFVVDPPQGIIQAIEVTAEGIGRDA<br>SDLLR        | 120 | 30 | 3  | 11.06  | b6y6y8                             | 3154.66 | 137.227 | 2132   | 3 | 1052.22 | -5.49  |
| P0A251 AHPC_SALTY Alkyl hydroperoxide reductase subunit C  | 9  | Carbamidomethyl+C(13) | AAQYVAAHPEVCPAK                            | 153 | 16 | 14 | 117.15 | b3b4*b4b5*b5b8b9b10y3y4y8y9y11y12  | 1668.79 | 35.855  | 105482 | 3 | 556.93  | -16.17 |
| P0A251 AHPC_SALTY Alkyl hydroperoxide reductase subunit C  | 10 |                       | EGEATLAPSLDLVGK                            | 171 | 15 | 5  | 20.16  | b6b9y3y11*y11                      | 1499.78 | 53.595  | 10061  | 2 | 750.39  | -8.79  |
| P0A251 AHPC_SALTY Alkyl hydroperoxide reductase subunit C  | 11 |                       | NGEFIEVTEKDTEGR                            | 17  | 15 | 8  | 59.77  | b5b7b8*b8b9y8y9y10                 | 1723.81 | 60.585  | 2295   | 3 | 575.28  | 0.85   |
| P0A251 AHPC_SALTY Alkyl hydroperoxide reductase subunit C  | 12 | Phosphoryl STY(17)    | ATFVVDPPQGIIQAIEVTAEGIGR                   | 120 | 23 | 8  | 43.66  | b3y5y6*y6y11_H3PO4y10y11*y11y12    | 2464.24 | 49.587  | 2565   | 6 | 411.55  | -0.79  |
| P0A251 AHPC_SALTY Alkyl hydroperoxide reductase subunit C  | 13 |                       | NGEFIEVTEK                                 | 17  | 10 | 3  | 22.55  | y3y5y8                             | 1165.56 | 63.249  | 1552   | 2 | 583.29  | -7.85  |
| P06202 OPPA_SALTY Periplasmic oligopeptide-binding protein | 1  |                       | LADPNTASPYASYLQYGHIANIDD<br>IIAGKKPATDLGVK | 125 | 38 | 12 | 77.9   | b3b4b5b6b7b8*b8y3y4y8y31y38        | 4001.01 | 83.962  | 155920 | 5 | 801.01  | -13.55 |
| P06202 OPPA_SALTY Periplasmic oligopeptide-binding protein | 2  |                       | LVEPEWFK                                   | 352 | 8  | 5  | 27.86  | b6y2y5y6y8                         | 1047.54 | 71.905  | 87655  | 2 | 524.27  | -10.60 |
| P06202 OPPA_SALTY Periplasmic oligopeptide-binding protein | 3  |                       | NQGDLPAYSYTPPYTDGAK                        | 333 | 19 | 5  | 12.16  | b5y7*y7y11y19                      | 2057.95 | 62.738  | 58408  | 3 | 686.65  | 0.47   |
| P06202 OPPA_SALTY Periplasmic oligopeptide-binding protein | 4  |                       | WSDGTPVTAHDFVYSWQR                         | 107 | 18 | 13 | 49.44  | b2*b2y4*y4y5*y5*y5y7*y7y9y10y13y18 | 2151.99 | 73.345  | 49336  | 3 | 718.00  | 3.06   |
| P06202 OPPA_SALTY Periplasmic oligopeptide-binding protein | 5  |                       | AEQQLDKDSAIVPYYYYVNAR                      | 494 | 21 | 3  | 11.55  | b11y3y9                            | 2442.22 | 73.897  | 48675  | 3 | 814.75  | -2.30  |
| P06202 OPPA_SALTY Periplasmic oligopeptide-binding protein | 6  |                       | TVINQVTYLPISSEVTDVNR                       | 241 | 20 | 8  | 56.38  | y3y4y5y9y11y12y14y20               | 2248.19 | 77.778  | 42313  | 2 | 1124.60 | 4.02   |
| P06202 OPPA_SALTY Periplasmic oligopeptide-binding protein | 7  |                       | NLGVNVNLENQEWK                             | 410 | 14 | 8  | 34.58  | b3y1y3y8y10y11*y11y14              | 1656.84 | 67.477  | 29929  | 2 | 828.93  | 5.38   |
| P06202 OPPA_SALTY Periplasmic oligopeptide-binding protein | 8  |                       | ALDDHTFEVTLSEPVPYFYK                       | 163 | 20 | 3  | 11.82  | b14y5y7                            | 2371.15 | 86.844  | 24927  | 3 | 791.05  | -1.54  |
| P06202 OPPA_SALTY Periplasmic oligopeptide-binding protein | 9  |                       | LADPNTASPYASYLQYGHIANIDD<br>IIAGK          | 125 | 29 | 8  | 14.4   | b1b3b8*b8b12y1y3y29                | 3091.54 | 88.969  | 21773  | 3 | 1031.18 | 0.08   |
| P06202 OPPA_SALTY Periplasmic oligopeptide-binding protein | 10 | Carbamidomethyl+C(6)  | VDPYLCTYYEINNQK                            | 291 | 16 | 4  | 20.25  | b3b4y2y8                           | 2082.97 | 71.407  | 6875   | 2 | 1041.99 | 12.19  |
| P06202 OPPA_SALTY Periplasmic oligopeptide-binding protein | 11 |                       | VWTFHLRENAK                                | 96  | 11 | 6  | 44     | b1b5b6b9b10*b10                    | 1400.74 | 63.096  | 5668   | 2 | 700.87  | -5.32  |
| P06202 OPPA_SALTY Periplasmic oligopeptide-binding protein | 12 |                       | DLFEGLLISDVEGHPSPGVAEK                     | 67  | 22 | 6  | 14.1   | b5*b5b12y9*y9y13                   | 2309.16 | 113.781 | 2139   | 3 | 770.39  | -2.33  |

|                                                             |    |                       |                               |     |    |    |       |                                        |         |        |        |   |         |        |
|-------------------------------------------------------------|----|-----------------------|-------------------------------|-----|----|----|-------|----------------------------------------|---------|--------|--------|---|---------|--------|
| [P06202]OPPA_SALTY Periplasmic oligopeptide-binding protein | 13 | Carbamidomethyl+C(4)  | AGWCADYNEPTSFLNTMLSDSSNNTAHYK | 439 | 29 | 4  | 21.4  | b4y12y13*y13                           | 3294.42 | 90.842 | 72548  | 3 | 1098.81 | 1.93   |
| [P06202]OPPA_SALTY Periplasmic oligopeptide-binding protein | 14 |                       | SGEIDMTYNNMPIELFQK            | 263 | 18 | 6  | 33.08 | b3b11b14y3y4y7                         | 2130.00 | 87.265 | 68345  | 2 | 1065.50 | 6.30   |
| [P06202]OPPA_SALTY Periplasmic oligopeptide-binding protein | 15 |                       | EIPNEVR                       | 284 | 7  | 5  | 46.26 | b4b5y5y6*y6                            | 856.47  | 31.417 | 5971   | 2 | 428.74  | 15.25  |
| [P06202]OPPA_SALTY Periplasmic oligopeptide-binding protein | 16 |                       | IEGVPESNVSR                   | 56  | 11 | 15 | 95.03 | b3b7y3y4°y4*y4y5*y5y6y8y9°y9*y9y10°y10 | 1186.60 | 37.241 | 4787   | 2 | 593.80  | -3.70  |
| [P06202]OPPA_SALTY Periplasmic oligopeptide-binding protein | 17 |                       | SNITK                         | 1   | 5  | 1  | 11.25 | y4                                     | 562.31  | 27.454 | 2309   | 1 | 562.31  | -12.81 |
| [P06202]OPPA_SALTY Periplasmic oligopeptide-binding protein | 18 |                       | HQGTFDVAR                     | 430 | 9  | 3  | 25.47 | b6y4y6                                 | 1030.53 | 31.379 | 1803   | 2 | 515.77  | 18.01  |
| [P06202]OPPA_SALTY Periplasmic oligopeptide-binding protein | 19 |                       | WTQPANIVTNGAYK                | 204 | 14 | 4  | 15.39 | b5°b5b7y9                              | 1562.77 | 38.036 | 1661   | 3 | 521.59  | -19.14 |
| [P06202]OPPA_SALTY Periplasmic oligopeptide-binding protein | 20 |                       | DSAIVPVYYYVNAR                | 501 | 14 | 4  | 21.71 | b3b5y7y10                              | 1629.85 | 57.625 | 1607   | 2 | 815.43  | 14.98  |
| [P06202]OPPA_SALTY Periplasmic oligopeptide-binding protein | 21 |                       | KNLGVNVNLENQEWK               | 409 | 15 | 3  | 31    | y8y9y10                                | 1784.93 | 54.331 | 132769 | 3 | 595.65  | 2.05   |
| [P06202]OPPA_SALTY Periplasmic oligopeptide-binding protein | 22 |                       | FGDKWTQPANIVTNGAYK            | 200 | 18 | 5  | 19.85 | b4b12°b12b14y3                         | 2009.99 | 80.102 | 51272  | 2 | 1005.50 | -8.50  |
| [P06202]OPPA_SALTY Periplasmic oligopeptide-binding protein | 23 |                       | TVINQVTYLPISSEVTDVNRYS        | 241 | 22 | 7  | 32.37 | y9°y9y10y13*y13y16y19                  | 2567.34 | 77.833 | 36264  | 3 | 856.45  | -2.66  |
| [P06202]OPPA_SALTY Periplasmic oligopeptide-binding protein | 24 |                       | IVLERNPQYWDNAK                | 227 | 14 | 3  | 23.96 | y4y6y9                                 | 1745.89 | 54.287 | 22048  | 3 | 582.63  | -6.85  |
| [P06202]OPPA_SALTY Periplasmic oligopeptide-binding protein | 25 |                       | VKNQGDLPAYSYTPPYTDGAK         | 331 | 21 | 3  | 11.55 | b6b11y6                                | 2285.09 | 69.906 | 18077  | 4 | 572.03  | -6.09  |
| [P06202]OPPA_SALTY Periplasmic oligopeptide-binding protein | 26 | Carbamidomethyl+C(13) | EIPNEVRVDPYLCTYYYEINNQK       | 284 | 23 | 6  | 13.64 | b4b6°b6y10°y10y21                      | 2920.39 | 76.823 | 13642  | 3 | 974.13  | 1.67   |
| [P06202]OPPA_SALTY Periplasmic oligopeptide-binding protein | 27 |                       | AEQQLDKDSAIVPVYYYVNAR         | 494 | 21 | 6  | 46.2  | b5b7y5y6y7y8                           | 2442.25 | 74.040 | 8245   | 2 | 1221.63 | 6.80   |
| [P06202]OPPA_SALTY Periplasmic oligopeptide-binding protein | 28 |                       | SELYAKAEQQLDK                 | 488 | 13 | 8  | 42.99 | b4b5b7°b7y4y8*y8y9                     | 1522.79 | 49.635 | 3019   | 3 | 508.27  | 13.07  |
| [P06202]OPPA_SALTY Periplasmic oligopeptide-binding protein | 29 |                       | NQGDLPAYSYTPPYTDGAKLVEPEWFK   | 333 | 27 | 5  | 19.6  | b8y4°y4y5y7                            | 3086.47 | 85.300 | 2042   | 3 | 1029.49 | -3.64  |
| [P06202]OPPA_SALTY Periplasmic oligopeptide-binding protein | 30 |                       | LADPNTASPYASYLQYGHIANIDDII    | 125 | 26 | 1  | 16.79 | y11                                    | 2835.37 | 83.885 | 3920   | 3 | 945.80  | -3.96  |
| [P06202]OPPA_SALTY Periplasmic oligopeptide-binding protein | 31 |                       | ALDDHTFEVTLIS                 | 163 | 12 | 1  | 8.91  | y6                                     | 1347.63 | 86.787 | 1976   | 3 | 449.88  | -11.59 |

|                                                             |    |                      |                             |     |    |    |        |                                                        |         |         |        |   |         |        |
|-------------------------------------------------------------|----|----------------------|-----------------------------|-----|----|----|--------|--------------------------------------------------------|---------|---------|--------|---|---------|--------|
| P0A2A9 RS16_SALTY 30S ribosomal protein S16                 | 1  |                      | IAHWVGQGATISDR              | 56  | 14 | 22 | 155.39 | b2b3b4b6b7b10b13y1y2y3y4°y4y5°y5y7y8y9*y9y11°y11y12y14 | 1510.76 | 48.836  | 122587 | 3 | 504.26  | -10.18 |
| P0A2A9 RS16_SALTY 30S ribosomal protein S16                 | 2  |                      | VGFFNPIASEKEEGTR            | 35  | 16 | 5  | 21.42  | y5°y5y8y10°y10                                         | 1780.88 | 67.187  | 2543   | 2 | 890.94  | -3.50  |
| P0A2A9 RS16_SALTY 30S ribosomal protein S16                 | 3  |                      | RPFYQVVVTDSR                | 13  | 12 | 3  | 21.92  | b6y8y9                                                 | 1466.75 | 44.544  | 6456   | 3 | 489.59  | -18.06 |
| P0A2A9 RS16_SALTY 30S ribosomal protein S16                 | 4  |                      | VAALIK                      | 70  | 6  | 2  | 23.13  | b3y5                                                   | 614.42  | 37.239  | 2808   | 1 | 614.42  | -3.38  |
| P0A2A9 RS16_SALTY 30S ribosomal protein S16                 | 5  |                      | NGRFIER                     | 28  | 7  | 3  | 35.01  | b3b5b6                                                 | 891.48  | 47.858  | 37710  | 2 | 446.25  | 5.00   |
| P0A2A9 RS16_SALTY 30S ribosomal protein S16                 | 6  |                      | EEGTRLDLDR                  | 46  | 10 | 5  | 49.4   | b5b7b8b9y4                                             | 1203.59 | 66.270  | 7558   | 2 | 602.30  | -8.01  |
| P0A2A9 RS16_SALTY 30S ribosomal protein S16                 | 7  |                      | FIERVGFFNPIASEK             | 31  | 15 | 4  | 14.47  | b10y7*y7y10                                            | 1753.93 | 55.233  | 4501   | 2 | 877.47  | 3.34   |
| P0A2A9 RS16_SALTY 30S ribosomal protein S16                 | 8  |                      | VGFFNPIASEKEEGTR            | 35  | 16 | 9  | 52.62  | b3b4b9b10°b10y7y9y10°y10                               | 1780.88 | 48.865  | 3409   | 3 | 594.30  | -1.30  |
| P0A7Z7 RPOA_SALTY DNA-directed RNA polymerase subunit alpha | 1  |                      | VTLEPLER                    | 25  | 8  | 8  | 53.37  | b4y1y3y4°y4y5y6y8                                      | 956.53  | 52.715  | 67726  | 2 | 478.77  | -10.40 |
| P0A7Z7 RPOA_SALTY DNA-directed RNA polymerase subunit alpha | 2  | Carbamidomethyl+C(6) | LLVDACYSPVER                | 170 | 12 | 10 | 83.15  | b2y2y5y6y7y8y9y10y11y12                                | 1421.70 | 59.816  | 52157  | 2 | 711.36  | -3.69  |
| P0A7Z7 RPOA_SALTY DNA-directed RNA polymerase subunit alpha | 3  |                      | LENWPPASIADE                | 317 | 12 | 15 | 70.6   | b2b3b4°b4b5b7°b7b8°b8°b9°b9y1y8y9y12                   | 1341.64 | 42.447  | 16379  | 2 | 671.32  | 5.46   |
| P0A7Z7 RPOA_SALTY DNA-directed RNA polymerase subunit alpha | 4  |                      | EGVQEDILEILLNLK             | 71  | 15 | 6  | 14.47  | b2°b2b4b11*b11y3                                       | 1725.97 | 123.298 | 12757  | 2 | 863.49  | 3.68   |
| P0A7Z7 RPOA_SALTY DNA-directed RNA polymerase subunit alpha | 5  |                      | IHSEEDERPIGR                | 158 | 12 | 4  | 21.92  | b2b3b4y7                                               | 1437.72 | 66.950  | 12558  | 2 | 719.36  | 5.86   |
| P0A7Z7 RPOA_SALTY DNA-directed RNA polymerase subunit alpha | 6  |                      | LVIEMETNGTIDPEEAIR          | 200 | 18 | 4  | 16.78  | b5b7y7y10                                              | 2029.97 | 89.541  | 74255  | 2 | 1015.49 | -18.34 |
| P0A7Z7 RPOA_SALTY DNA-directed RNA polymerase subunit alpha | 7  |                      | LVDIEQVSSTHAK               | 12  | 13 | 17 | 85.49  | b3°b3b5°b5b6°b6°b6b10°b10y3y5°y5y7y8*y8y10°y10         | 1426.72 | 46.015  | 57388  | 3 | 476.25  | -20.53 |
| P0A7Z7 RPOA_SALTY DNA-directed RNA polymerase subunit alpha | 8  |                      | MQGSVTEFLKPR                | 0   | 12 | 3  | 21.92  | b10b11y10                                              | 1392.71 | 59.814  | 22422  | 3 | 464.91  | -15.08 |
| P0A7Z7 RPOA_SALTY DNA-directed RNA polymerase subunit alpha | 9  |                      | TDLDK                       | 195 | 5  | 2  | 11.25  | b3°b3                                                  | 591.30  | 101.757 | 14664  | 1 | 591.30  | 4.75   |
| P0A7Z7 RPOA_SALTY DNA-directed RNA polymerase subunit alpha | 10 | Carbamidomethyl+C(4) | SANCLK                      | 265 | 6  | 1  | 11.88  | y3                                                     | 692.34  | 91.771  | 9959   | 1 | 692.34  | -1.15  |
| P0A7Z7 RPOA_SALTY DNA-directed RNA polymerase subunit alpha | 11 |                      | VEQR                        | 191 | 4  | 3  | 21.87  | b3y3*y3                                                | 531.29  | 30.728  | 2640   | 1 | 531.29  | 10.57  |
| P0A7Z7 RPOA_SALTY DNA-directed RNA polymerase subunit alpha | 12 |                      | TPNLGK                      | 291 | 6  | 1  | 11.88  | y3                                                     | 629.36  | 30.266  | 1646   | 1 | 629.36  | -6.79  |
| P0A7Z7 RPOA_SALTY DNA-directed RNA polymerase subunit alpha | 13 |                      | GYVPASTRIHSEEDERPIGR        | 150 | 20 | 9  | 47.92  | b3b7b8b11°b11b12y3y6y11                                | 2269.13 | 69.920  | 36478  | 3 | 757.05  | -2.47  |
| P0A7Z7 RPOA_SALTY DNA-directed RNA polymerase subunit alpha | 14 |                      | QPEVKEEKPEFDPILLRPVDDLELTVR | 238 | 27 | 6  | 45.21  | b8b9b10°b10b11b13                                      | 3204.67 | 60.613  | 4319   | 3 | 1068.90 | -13.41 |

|                                                                               |    |                       |                                                          |     |    |    |       |                                              |         |         |       |   |         |        |
|-------------------------------------------------------------------------------|----|-----------------------|----------------------------------------------------------|-----|----|----|-------|----------------------------------------------|---------|---------|-------|---|---------|--------|
| P0A7Z7 RPOA_SALTY DNA-directed RNA polymerase subunit alpha                   | 15 | Carbamidomethyl+C(6)  | LLVDACYSPVERIAYNVEAAR                                    | 170 | 21 | 6  | 32.33 | b6b7b8b10y7°y7                               | 2409.19 | 114.678 | 2442  | 3 | 803.74  | -13.38 |
| P0A7Z7 RPOA_SALTY DNA-directed RNA polymerase subunit alpha                   | 16 |                       | GLSLGMRLNWPPASIADE                                       | 310 | 19 | 7  | 26.64 | b10°b10y5y8°y8y9y12                          | 2056.03 | 89.620  | 1808  | 3 | 686.01  | 6.29   |
| P0A7Z7 RPOA_SALTY DNA-directed RNA polymerase subunit alpha                   | 17 | Phosphoryl STY(7)     | LVIEMETNGTIDPEEAIIR                                      | 200 | 18 | 8  | 36.75 | b3y7°y7y8°y8y10y11*y11                       | 2110.00 | 74.128  | 1528  | 2 | 1055.50 | 13.31  |
| P0A7Z7 RPOA_SALTY DNA-directed RNA polymerase subunit alpha                   | 18 | Oxidation+M(5)        | LVIEMETNGTIDPEEAIIR                                      | 200 | 19 | 6  | 30.43 | b5b12y4y8y10y11                              | 2202.11 | 54.329  | 4757  | 4 | 551.28  | 0.44   |
| P29768 NANH_SALTY Sialidase                                                   | 1  |                       | SDISLYAHNLYSGEVK                                         | 309 | 16 | 9  | 39.43 | b1b2b3b7b10b12y4y10*y10                      | 1795.90 | 72.360  | 39468 | 2 | 898.45  | 5.64   |
| P29768 NANH_SALTY Sialidase                                                   | 2  |                       | HNTASDQSFIDTAAAR                                         | 56  | 16 | 5  | 13.71 | b2b3°b3b7y6                                  | 1704.79 | 42.504  | 7462  | 3 | 568.93  | -4.01  |
| P29768 NANH_SALTY Sialidase                                                   | 3  | Carbamidomethyl+C(6)  | VMDPTCIVANIQGR                                           | 97  | 14 | 8  | 24.88 | b2b10°b10y2y9y11y12°y12                      | 1573.77 | 68.952  | 5024  | 2 | 787.39  | -10.47 |
| P29768 NANH_SALTY Sialidase                                                   | 4  |                       | IAIYNDR                                                  | 83  | 7  | 10 | 43.25 | b2b4b5°b5b6b7°b7y2y6°y6                      | 864.45  | 30.748  | 3632  | 1 | 864.45  | -4.94  |
| P29768 NANH_SALTY Sialidase                                                   | 5  |                       | LVFPVQMVR                                                | 188 | 9  | 5  | 25.47 | b6°b6b7°b7y8                                 | 1088.61 | 32.008  | 12288 | 3 | 363.54  | -18.28 |
| P29768 NANH_SALTY Sialidase                                                   | 6  |                       | APDTDWDLVLYK                                             | 134 | 12 | 3  | 17.94 | b5b11y9                                      | 1435.72 | 69.968  | 7389  | 2 | 718.37  | 9.27   |
| P29768 NANH_SALTY Sialidase                                                   | 7  |                       | NGTISAMLGGVGSGLQLNDGK                                    | 167 | 21 | 4  | 11.55 | b13°b13b15y7                                 | 1989.04 | 74.981  | 7060  | 2 | 995.02  | 17.92  |
| P29768 NANH_SALTY Sialidase                                                   | 8  |                       | TWGAAYR                                                  | 126 | 6  | 1  | 11.88 | y5                                           | 753.36  | 32.871  | 4498  | 2 | 377.18  | -12.80 |
| P29768 NANH_SALTY Sialidase                                                   | 9  |                       | LVAAHSSAQNK                                              | 292 | 11 | 4  | 28.77 | b6b9y3y5                                     | 1125.61 | 39.155  | 3949  | 2 | 563.31  | 7.81   |
| P29768 NANH_SALTY Sialidase                                                   | 10 |                       | HNTASDQSFIDTAAARSTDGGK                                   | 56  | 22 | 3  | 17.85 | y4y10y14                                     | 2250.07 | 55.398  | 5497  | 4 | 563.27  | 13.24  |
| P29768 NANH_SALTY Sialidase                                                   | 11 |                       | GNTIVGSGSGGTTKYFR                                        | 20  | 17 | 3  | 13.09 | b6y6y10                                      | 1701.85 | 80.553  | 3356  | 2 | 851.43  | -3.44  |
| P29768 NANH_SALTY Sialidase                                                   | 12 | Carbamidomethyl+C(19) | LIDDFYPKVGNASGAGYSCLSYR                                  | 325 | 23 | 4  | 17.57 | b6b8°b8b10                                   | 2553.25 | 125.750 | 1966  | 4 | 639.07  | 15.11  |
| P29768 NANH_SALTY Sialidase                                                   | 13 | Carbamidomethyl+C(9)  | LSRVMDPTCIVANIQGR                                        | 94  | 17 | 4  | 13.09 | b7°b7y6y11                                   | 1930.00 | 103.617 | 1584  | 3 | 644.01  | 2.28   |
| P29768 NANH_SALTY Sialidase                                                   | 14 | Phosphoryl STY(8)     | NVDKETLYVVYEANGSIEFQDLSR                                 | 349 | 24 | 9  | 42.54 | b7b8b13_H3PO4<br>b13y5°y5y6y7y11°y11         | 2869.35 | 80.139  | 19498 | 3 | 957.12  | 8.93   |
| P29768 NANH_SALTY Sialidase                                                   | 15 | Phosphoryl STY(7)     | GNTIVGSGSGGTTK                                           | 20  | 14 | 5  | 15.39 | b3°b3y7°y7y9                                 | 1315.57 | 42.522  | 4001  | 2 | 658.29  | -9.74  |
| P29768 NANH_SALTY Sialidase                                                   | 16 | Phosphoryl STY(5)     | NGTISAMLGGVGSGLQLNDGK                                    | 167 | 21 | 7  | 23.49 | b3°b3b6y5y11°y11y12                          | 2068.98 | 95.516  | 1946  | 3 | 690.33  | 6.84   |
| P29768 NANH_SALTY Sialidase                                                   | 17 | Oxidation+M(7)        | NGTISAMLGGVGSGLQLNDGK                                    | 167 | 21 | 14 | 62.52 | b4°b4b8b9°b9b10b11°b11<br>b13°b13b14y4°y4y13 | 2005.02 | 46.013  | 4165  | 3 | 669.01  | 7.61   |
| P29768 NANH_SALTY Sialidase                                                   | 18 |                       | IDTAAAR                                                  | 65  | 7  | 2  | 7.74  | b5°b5                                        | 717.40  | 42.462  | 3419  | 2 | 359.20  | 12.34  |
| P69936 YDFG_SALTY NADP-dependent L-serine/L-allo-threonine dehydrogenase ydfG | 1  |                       | VTDIEPLVGGETESSVR                                        | 171 | 18 | 11 | 46.96 | b2b3°b3b5b6b7y9y13y14°y14y18                 | 1862.96 | 69.882  | 23442 | 2 | 931.98  | 5.24   |
| P69936 YDFG_SALTY NADP-dependent L-serine/L-allo-threonine dehydrogenase ydfG | 2  |                       | AVLPGMVER                                                | 115 | 9  | 10 | 47.52 | b1y2°y2y4°y4y5y6°y6y7°y7                     | 971.53  | 53.500  | 19727 | 2 | 486.27  | -9.11  |
| P69936 YDFG_SALTY NADP-dependent L-serine/L-allo-threonine dehydrogenase ydfG | 3  |                       | AAIEEMMASLPAQWR                                          | 58  | 15 | 6  | 32.2  | b4b5°b5y4y5*y5                               | 1703.84 | 91.501  | 17068 | 2 | 852.43  | 12.04  |
| P69936 YDFG_SALTY NADP-dependent L-serine/L-allo-threonine dehydrogenase ydfG | 4  |                       | TYENTTALTPEITEAVWWVATL<br>PAHVNIINTVEMMPVTQSFAGLSV<br>HR | 199 | 48 | 4  | 15.07 | b13b23°b23y4                                 | 5340.60 | 136.522 | 13312 | 4 | 1335.91 | -6.22  |
| P69936 YDFG_SALTY NADP-dependent L-serine/L-allo-threonine dehydrogenase ydfG | 5  |                       | DELGENVLT AQLDVR                                         | 41  | 15 | 5  | 31    | b8°b8b9b10b15                                | 1671.85 | 42.460  | 4078  | 2 | 836.43  | -3.29  |
| P69936 YDFG_SALTY NADP-dependent L-serine/L-allo-threonine dehydrogenase ydfG | 6  |                       | TDLHGTA VR                                               | 162 | 9  | 4  | 37.97 | b4b6y5y8                                     | 969.49  | 56.805  | 14708 | 2 | 485.25  | -19.45 |

|                                                                                |    |                                             |                                       |     |    |    |       |                                                         |         |         |       |   |         |        |
|--------------------------------------------------------------------------------|----|---------------------------------------------|---------------------------------------|-----|----|----|-------|---------------------------------------------------------|---------|---------|-------|---|---------|--------|
| [P69936]YDFG_SALTY NADP-dependent L-serine/L-allo-threonine dehydrogenase ydfG | 7  |                                             | ASVEDWETMIDTNNK                       | 93  | 15 | 6  | 14.47 | b4°b4y4°y4y6*y6                                         | 1752.81 | 72.639  | 6793  | 2 | 876.91  | 17.83  |
| [P69936]YDFG_SALTY NADP-dependent L-serine/L-allo-threonine dehydrogenase ydfG | 8  |                                             | FVENGHKVIATGR                         | 19  | 13 | 4  | 24.01 | b4b7b8*b8                                               | 1427.80 | 59.308  | 13480 | 2 | 714.40  | 14.11  |
| [P69936]YDFG_SALTY NADP-dependent L-serine/L-allo-threonine dehydrogenase ydfG | 9  |                                             | NRGHIINIGSTAGSWPYAGGNVYG<br>ATK       | 124 | 27 | 4  | 12.37 | b4b14y5y11                                              | 2761.40 | 125.401 | 1633  | 3 | 921.14  | 8.84   |
| [P69936]YDFG_SALTY NADP-dependent L-serine/L-allo-threonine dehydrogenase ydfG | 10 | Phosphoryl STY(4)                           | VIATGRR                               | 26  | 7  | 3  | 35.01 | b4y3y6                                                  | 852.43  | 30.670  | 9289  | 2 | 426.72  | -11.89 |
| [P69936]YDFG_SALTY NADP-dependent L-serine/L-allo-threonine dehydrogenase ydfG | 11 | Carbamidomethyl+C(14)<br>;Phosphoryl STY(8) | IVLVTGATAGFGECIARR                    | 1   | 18 | 6  | 24.05 | b9b11y6y8y10°y10                                        | 1970.99 | 79.299  | 3061  | 2 | 986.00  | 4.52   |
| [P69936]YDFG_SALTY NADP-dependent L-serine/L-allo-threonine dehydrogenase ydfG | 12 | Carbamidomethyl+C(15)<br>;Phosphoryl STY(9) | MIVLVTGATAGFGECIARR                   | 0   | 19 | 9  | 43.06 | b9°b9b14y4y6y7y9°y9y10                                  | 2102.05 | 70.920  | 2351  | 5 | 421.22  | 13.94  |
| [P69936]YDFG_SALTY NADP-dependent L-serine/L-allo-threonine dehydrogenase ydfG | 13 | Oxidation+M(9)                              | ASVEDWETMIDTNNK                       | 93  | 15 | 7  | 20.16 | b3°b3b10y4*y4y9*y9                                      | 1768.75 | 42.455  | 23082 | 4 | 442.94  | -9.32  |
| [P69936]YDFG_SALTY NADP-dependent L-serine/L-allo-threonine dehydrogenase ydfG | 14 | Carbamidomethyl+C(15)<br>;Oxidation+M(1)    | MIVLVTGATAGFGECIAR                    | 0   | 18 | 4  | 21.61 | b15y7y8y14                                              | 1881.95 | 95.535  | 4364  | 2 | 941.48  | -1.62  |
| [P69936]YDFG_SALTY NADP-dependent L-serine/L-allo-threonine dehydrogenase ydfG | 15 | Oxidation+M()                               | AAIEEMMASLPAQWR                       | 58  | 15 | 8  | 23.8  | b12y3*y3y11°y11*y11y13°<br>y13                          | 1719.81 | 72.459  | 4100  | 3 | 573.94  | -6.96  |
| [P00929]TRPA_SALTY Tryptophan synthase alpha chain                             | 1  |                                             | YENLFAQLNDR                           | 3   | 11 | 18 | 87.76 | b1b2b4b7°b8°b8b10b11°b1<br>ly3°y3y5y6°y6y7*y7y10y1<br>1 | 1382.68 | 59.769  | 51374 | 2 | 691.84  | 6.27   |
| [P00929]TRPA_SALTY Tryptophan synthase alpha chain                             | 2  | Carbamidomethyl+C(11)                       | AFAAGVTPAQCFEMLALIR                   | 70  | 19 | 6  | 28.4  | b2b3b6b8b11y12                                          | 2066.06 | 102.191 | 10780 | 2 | 1033.53 | 2.48   |
| [P00929]TRPA_SALTY Tryptophan synthase alpha chain                             | 3  |                                             | QVASYGR                               | 164 | 7  | 8  | 35.01 | b2b4°b4°b4y2y4y6°y6                                     | 780.40  | 38.040  | 10098 | 2 | 390.70  | -5.40  |
| [P00929]TRPA_SALTY Tryptophan synthase alpha chain                             | 4  |                                             | EGAFVPFVTLGDPGIEQSLK                  | 15  | 20 | 6  | 11.82 | b2°b2b7°b7y7y11                                         | 2104.10 | 85.662  | 7668  | 3 | 702.04  | 3.13   |
| [P00929]TRPA_SALTY Tryptophan synthase alpha chain                             | 5  |                                             | HPTIPIGLLMYANLVFNNGIDAFY<br>AR        | 91  | 26 | 5  | 21.36 | b20y3y5y8y10                                            | 2920.54 | 42.491  | 4701  | 6 | 487.60  | 7.44   |
| [P00929]TRPA_SALTY Tryptophan synthase alpha chain                             | 6  | Carbamidomethyl+C(1)                        | CEQVGVDSVLVADVPVEESAPFR               | 117 | 23 | 4  | 22.67 | b10b11y8y13                                             | 2502.23 | 84.125  | 2294  | 3 | 834.75  | 3.90   |
| [P00929]TRPA_SALTY Tryptophan synthase alpha chain                             | 7  |                                             | SGVTGAENR                             | 179 | 9  | 4  | 37.97 | b4b5y5y6                                                | 890.43  | 45.982  | 6340  | 1 | 890.43  | -7.40  |
| [P00929]TRPA_SALTY Tryptophan synthase alpha chain                             | 8  |                                             | AGAAGAISGSAIVK                        | 225 | 14 | 3  | 23.96 | b3b5b9                                                  | 1172.67 | 46.798  | 6234  | 3 | 391.56  | 9.06   |
| [P00929]TRPA_SALTY Tryptophan synthase alpha chain                             | 9  |                                             | IIDLIDAGADALELGVFSDPLAD<br>GPTIQNANLR | 35  | 35 | 4  | 11.67 | b12b14y11y15                                            | 3605.86 | 112.454 | 5604  | 3 | 1202.63 | -2.17  |
| [P00929]TRPA_SALTY Tryptophan synthase alpha chain                             | 10 |                                             | EYHAAPALQGFGISSPEQVSAAVR              | 201 | 24 | 4  | 19.8  | b18y12y14y15                                            | 2485.19 | 136.848 | 1531  | 2 | 1243.10 | -21.61 |
| [P00929]TRPA_SALTY Tryptophan synthase alpha chain                             | 11 |                                             | MERYENLFAQLNDR                        | 0   | 14 | 9  | 40.6  | b8y3°y3y5°y5y7y11°y11*y<br>11                           | 1798.83 | 48.835  | 10465 | 3 | 600.28  | -12.21 |
| [P00929]TRPA_SALTY Tryptophan synthase alpha chain                             | 12 |                                             | ERYENLFAQLNDR                         | 1   | 13 | 4  | 16.52 | b8y6*y6y10                                              | 1667.82 | 97.736  | 2398  | 3 | 556.61  | 2.20   |
| [P00929]TRPA_SALTY Tryptophan synthase alpha chain                             | 13 | Carbamidomethyl+C(11)<br>;Oxidation+M(14)   | AFAAGVTPAQCFEMLALIR                   | 70  | 19 | 5  | 31.54 | b9b10°b10b11y9                                          | 2082.07 | 78.073  | 4725  | 3 | 694.69  | 7.15   |
| [P00929]TRPA_SALTY Tryptophan synthase alpha chain                             | 14 |                                             | FAQLNDR                               | 7   | 7  | 1  | 7.24  | b3                                                      | 863.43  | 59.833  | 4607  | 1 | 863.43  | -9.40  |
| [P67179]YEBC_SALTY UPF0082 protein yebC                                        | 1  |                                             | VRDALEAAGLK                           | 181 | 11 | 11 | 56.5  | b9°b9b10°b10y1y2y4y6y7y<br>8y11                         | 1142.65 | 32.894  | 45485 | 2 | 571.83  | -5.34  |

|                                                                     |    |                       |                                       |     |    |    |       |                                 |         |         |       |   |         |        |
|---------------------------------------------------------------------|----|-----------------------|---------------------------------------|-----|----|----|-------|---------------------------------|---------|---------|-------|---|---------|--------|
| [P67179 YEBC_SALTY UPF0082 protein yebC                             | 2  |                       | ADMDAETAPK                            | 205 | 10 | 5  | 29.11 | b2y5y7y8y10                     | 1048.45 | 25.921  | 15227 | 2 | 524.73  | -7.34  |
| [P67179 YEBC_SALTY UPF0082 protein yebC                             | 3  |                       | LGGGDPDANPR                           | 37  | 11 | 11 | 47.47 | b1b5y1y2y4*y5y6y8*y8y10y11      | 1068.50 | 23.637  | 14346 | 2 | 534.75  | -5.03  |
| [P67179 YEBC_SALTY UPF0082 protein yebC                             | 4  |                       | ALANNMTR                              | 55  | 8  | 4  | 42.12 | b3b5b6y6                        | 890.46  | 70.990  | 6333  | 2 | 445.74  | 13.09  |
| [P67179 YEBC_SALTY UPF0082 protein yebC                             | 5  |                       | ALANNMTRDTLNR                         | 55  | 13 | 9  | 46.3  | b2b4b5b6b11y8*y8y12y13          | 1489.76 | 54.266  | 5005  | 2 | 745.39  | 5.98   |
| [P67179 YEBC_SALTY UPF0082 protein yebC                             | 6  |                       | AAQDAK                                | 14  | 6  | 5  | 34.38 | b5y3y4*y4*y4                    | 603.30  | 61.909  | 16310 | 1 | 603.30  | -8.90  |
| [P67179 YEBC_SALTY UPF0082 protein yebC                             | 7  |                       | DALEAAGLK                             | 183 | 9  | 5  | 37.97 | b3b8*b8y4y7                     | 887.50  | 46.743  | 5509  | 2 | 444.25  | 13.55  |
| [P67179 YEBC_SALTY UPF0082 protein yebC                             | 8  |                       | TVAEVR                                | 108 | 6  | 1  | 11.88 | b3                              | 674.39  | 41.645  | 3845  | 1 | 674.39  | 6.52   |
| [P67179 YEBC_SALTY UPF0082 protein yebC                             | 9  | Carbamidomethyl+C(1)  | CGGNLGTGDSVAYLFSK                     | 119 | 17 | 3  | 13.09 | b5y12y14                        | 1745.84 | 75.373  | 2775  | 2 | 873.42  | 14.26  |
| [P67179 YEBC_SALTY UPF0082 protein yebC                             | 10 |                       | ADSAEVSMPSTK                          | 192 | 13 | 11 | 44.75 | b4*b4b9*b9b10*b10y4*y4y6y10*y10 | 1335.66 | 46.825  | 2664  | 2 | 668.33  | 8.77   |
| [P67179 YEBC_SALTY UPF0082 protein yebC                             | 11 |                       | GDEDTIMEAALEAGAEDVVTYDDGAIDVYTAWEEMGK | 144 | 37 | 3  | 17.76 | y4y10y12                        | 3979.79 | 91.663  | 2149  | 3 | 1327.27 | 15.03  |
| [P67179 YEBC_SALTY UPF0082 protein yebC                             | 12 |                       | WANTRHR                               | 6   | 7  | 5  | 35.01 | b4*b4b5b6*b6                    | 940.49  | 31.985  | 3666  | 1 | 940.49  | 7.01   |
| [P67179 YEBC_SALTY UPF0082 protein yebC                             | 13 |                       | AGHSKWANTR                            | 1   | 10 | 6  | 33.37 | b3y3*y3*y3y7y8                  | 1127.55 | 48.782  | 2684  | 2 | 564.28  | -14.62 |
| [P67179 YEBC_SALTY UPF0082 protein yebC                             | 14 |                       | KAAQDAK                               | 13  | 7  | 6  | 32    | b5*b5b6*b6y6*y6                 | 731.40  | 25.489  | 2069  | 2 | 366.20  | -12.43 |
| [P67179 YEBC_SALTY UPF0082 protein yebC                             | 15 | Carbamidomethyl+C(6)  | HAFSKCGNLTGDSVAYLFSK                  | 114 | 22 | 6  | 32.03 | b4b10b11b12*b12y11              | 2316.12 | 136.356 | 2018  | 2 | 1158.56 | 5.17   |
| [P67179 YEBC_SALTY UPF0082 protein yebC                             | 16 | Oxidation+M(6)        | ALANNMTR                              | 55  | 8  | 4  | 49.9  | b3y3y5y7                        | 906.43  | 90.664  | 5495  | 1 | 906.43  | -12.79 |
| [P67179 YEBC_SALTY UPF0082 protein yebC                             | 17 | Oxidation+M(6)        | ALANNMTRDTLNR                         | 55  | 13 | 5  | 23.58 | b9b11y5y10*y10                  | 1505.75 | 74.141  | 3871  | 2 | 753.38  | 2.03   |
| [P67179 YEBC_SALTY UPF0082 protein yebC                             | 18 |                       | ALEAAGLK                              | 184 | 8  | 4  | 19.28 | b4*b4b5*b5                      | 772.45  | 32.908  | 19631 | 2 | 386.73  | -10.67 |
| [P67179 YEBC_SALTY UPF0082 protein yebC                             | 19 |                       | RDALEAAGLK                            | 182 | 10 | 5  | 26.73 | b3*b3b7b8*b8                    | 1043.58 | 32.877  | 9125  | 2 | 522.29  | -6.32  |
| [P0A1R2 HIS6_SALTY Imidazole glycerol phohate synthase subunit hisF | 1  | Carbamidomethyl+C(10) | VAEVIDIPFCVAGGIR                      | 68  | 16 | 4  | 20.25 | b1b3b4y9                        | 1715.91 | 91.484  | 13785 | 2 | 858.46  | -3.91  |
| [P0A1R2 HIS6_SALTY Imidazole glycerol phohate synthase subunit hisF | 2  |                       | VTQWETLDWVQEVQQR                      | 153 | 16 | 7  | 30.5  | b2b11y3y5y6y11y16               | 2045.03 | 85.203  | 12759 | 2 | 1023.02 | 8.00   |
| [P0A1R2 HIS6_SALTY Imidazole glycerol phohate synthase subunit hisF | 3  | Carbamidomethyl+C(5)  | FGVQCIVVGIDTWFDATGK                   | 119 | 20 | 9  | 41.64 | b5b13y6y11*y11y12y13*y13y18     | 2228.08 | 113.710 | 4977  | 2 | 1114.54 | 4.16   |
| [P0A1R2 HIS6_SALTY Imidazole glycerol phohate synthase subunit hisF | 4  |                       | DADVDGALAASVFHK                       | 221 | 15 | 3  | 14.47 | b4b13y3                         | 1515.71 | 58.458  | 4421  | 2 | 758.36  | -19.41 |
| [P0A1R2 HIS6_SALTY Imidazole glycerol phohate synthase subunit hisF | 5  |                       | GAGEIVLNMMNQDGVR                      | 169 | 16 | 4  | 18.85 | b4b14y5y8                       | 1703.83 | 58.600  | 2716  | 2 | 852.42  | 5.73   |
| [P0A1R2 HIS6_SALTY Imidazole glycerol phohate synthase subunit hisF | 6  |                       | NGYDLTQLK                             | 185 | 9  | 4  | 50.53 | b3b5b7b8                        | 1051.52 | 59.762  | 2708  | 2 | 526.26  | -19.97 |
| [P0A1R2 HIS6_SALTY Imidazole glycerol phohate synthase subunit hisF | 7  |                       | YHVNQYTGDENRTR                        | 139 | 14 | 3  | 15.39 | b4b8y13                         | 1752.82 | 80.453  | 6812  | 3 | 584.95  | 9.40   |

|                                                                    |    |                       |                             |     |    |    |       |                                                |         |         |       |   |         |        |
|--------------------------------------------------------------------|----|-----------------------|-----------------------------|-----|----|----|-------|------------------------------------------------|---------|---------|-------|---|---------|--------|
| P0A1R2 HIS6_SALTY Imidazole glycerol phohate synthase subunit hisF | 8  |                       | RYADEGADELVFYDITASSDGR      | 37  | 22 | 9  | 19.56 | b4°b4b6°b6b13°b13y6y9°y9                       | 2450.10 | 118.812 | 2251  | 3 | 817.37  | -5.48  |
| P0A1R2 HIS6_SALTY Imidazole glycerol phohate synthase subunit hisF | 9  |                       | NHEIIGDIVPLAKR              | 24  | 14 | 3  | 15.39 | b4b6y4                                         | 1574.92 | 31.404  | 1910  | 2 | 787.96  | 13.02  |
| P0A1R2 HIS6_SALTY Imidazole glycerol phohate synthase subunit hisF | 10 | Carbamidomethyl+C(3)  | DVCRVPLIASGGAGTMEHFLEAFR    | 197 | 24 | 3  | 11.05 | b6y7y10                                        | 2633.26 | 93.439  | 1766  | 2 | 1317.14 | -12.70 |
| Q8ZP54 RNB_SALTY Exoribonuclease 2                                 | 1  |                       | GEAIARPQEDITQQMAER          | 516 | 18 | 4  | 19.99 | b6y5y6y18                                      | 2042.98 | 136.163 | 21319 | 2 | 1022.00 | -3.88  |
| Q8ZP54 RNB_SALTY Exoribonuclease 2                                 | 2  |                       | RELDAQPSGFILDSR             | 453 | 14 | 18 | 90.38 | b2°b2b5°b5b7°b7*b7b9b10b11y5°y5y6y8y9*y9y10y14 | 1590.78 | 45.987  | 20355 | 2 | 795.89  | -5.83  |
| Q8ZP54 RNB_SALTY Exoribonuclease 2                                 | 3  |                       | AFTNYLPGFNIPMLPR            | 248 | 16 | 5  | 21.42 | b6b11°b11b14y2                                 | 1850.96 | 68.885  | 5110  | 2 | 925.99  | 0.26   |
| Q8ZP54 RNB_SALTY Exoribonuclease 2                                 | 4  |                       | ERESAEPEELIEPFLTR           | 68  | 17 | 6  | 22.21 | b2b3b11°b11b12y10                              | 2045.00 | 68.567  | 3800  | 3 | 682.34  | -6.80  |
| Q8ZP54 RNB_SALTY Exoribonuclease 2                                 | 5  | Carbamidomethyl+C(23) | AFTNYLPGFNIPMLPRELSDDLCS LR | 248 | 26 | 3  | 10.93 | b3b6y12                                        | 3039.54 | 110.349 | 2898  | 3 | 1013.85 | 10.60  |
| Q8ZP54 RNB_SALTY Exoribonuclease 2                                 | 6  |                       | MIIAADGTIDDDIAFFAATIESK     | 285 | 23 | 4  | 17.57 | b2b3b8b12                                      | 2428.20 | 79.497  | 2810  | 3 | 810.07  | 3.52   |
| Q8ZP54 RNB_SALTY Exoribonuclease 2                                 | 7  | Carbamidomethyl+C(12) | IVEESMIAANLCAAR             | 387 | 15 | 5  | 20.16 | b4b14y6y13*y13                                 | 1647.83 | 96.664  | 2512  | 3 | 549.95  | 3.41   |
| Q8ZP54 RNB_SALTY Exoribonuclease 2                                 | 8  |                       | HNLEKEAPNGVATEMLDEGLER      | 167 | 22 | 4  | 11.33 | b2b4b9y9                                       | 2452.18 | 45.342  | 1878  | 6 | 409.54  | -0.50  |
| Q8ZP54 RNB_SALTY Exoribonuclease 2                                 | 9  |                       | SYFIPPPQMK                  | 42  | 10 | 7  | 52.41 | b3b6°b6b7b9y4*y4                               | 1207.62 | 32.038  | 90777 | 2 | 604.31  | -0.71  |
| Q8ZP54 RNB_SALTY Exoribonuclease 2                                 | 10 | Carbamidomethyl+C(18) | THGLHVDAAEEVLTLEGFCK        | 432 | 19 | 4  | 18.91 | b10y4y10y12                                    | 2155.02 | 103.143 | 20484 | 3 | 719.01  | -11.56 |
| Q8ZP54 RNB_SALTY Exoribonuclease 2                                 | 11 | Carbamidomethyl+C(2)  | ICLSR                       | 342 | 5  | 1  | 11.25 | y4                                             | 648.35  | 53.495  | 11096 | 1 | 648.35  | -7.25  |
| Q8ZP54 RNB_SALTY Exoribonuclease 2                                 | 12 |                       | DVGDWLYAR                   | 543 | 9  | 3  | 25.47 | b4y6y7                                         | 1094.51 | 50.255  | 10364 | 2 | 547.76  | -16.51 |
| Q8ZP54 RNB_SALTY Exoribonuclease 2                                 | 13 |                       | LGFGIYNVHTGFDPANADALAAL LK  | 407 | 25 | 4  | 17.2  | b4b7°b7b15                                     | 2588.30 | 61.918  | 6306  | 3 | 863.44  | -20.66 |
| Q8ZP54 RNB_SALTY Exoribonuclease 2                                 | 14 |                       | EAPNGVATEMLDEGLER           | 172 | 17 | 5  | 20.96 | b3b9b11°b11y14                                 | 1830.81 | 76.691  | 5605  | 3 | 610.94  | -21.87 |
| Q8ZP54 RNB_SALTY Exoribonuclease 2                                 | 15 | Carbamidomethyl+C(7)  | ELSDDLCSLR                  | 264 | 10 | 10 | 71.11 | b3°b3b4b9y4y6°y6y7y8°y8                        | 1207.55 | 37.236  | 2774  | 3 | 403.19  | -7.68  |
| Q8ZP54 RNB_SALTY Exoribonuclease 2                                 | 16 |                       | VMHGDR                      | 53  | 6  | 1  | 11.88 | y3                                             | 714.34  | 49.649  | 2365  | 1 | 714.34  | 12.99  |
| Q8ZP54 RNB_SALTY Exoribonuclease 2                                 | 17 | Carbamidomethyl+C(10) | ANEVRPALACR                 | 274 | 11 | 6  | 22.75 | b5°b5°b5b6°b6y4                                | 1256.68 | 31.428  | 1537  | 3 | 419.57  | 22.44  |
| Q8ZP54 RNB_SALTY Exoribonuclease 2                                 | 18 | Carbamidomethyl+C(2)  | ICLSRSEWR                   | 342 | 9  | 3  | 25.47 | b4b8y3                                         | 1206.61 | 41.235  | 20404 | 3 | 402.88  | 5.87   |
| Q8ZP54 RNB_SALTY Exoribonuclease 2                                 | 19 |                       | LQLTVAIADPTAWIAEGSKLDNTA K  | 221 | 25 | 3  | 20.51 | b3y5y6                                         | 2626.37 | 46.790  | 8450  | 6 | 438.57  | -13.57 |
| Q8ZP54 RNB_SALTY Exoribonuclease 2                                 | 20 | Carbamidomethyl+C(16) | IANRIVEESMIAANLCAAR         | 383 | 19 | 5  | 26.64 | b11y6y8y9y11                                   | 2102.06 | 83.344  | 7819  | 3 | 701.36  | -10.80 |
| Q8ZP54 RNB_SALTY Exoribonuclease 2                                 | 21 |                       | AGTNTRFAAEIIDVSR            | 557 | 16 | 5  | 31.96 | b6b7°b7b8y10                                   | 1720.87 | 59.817  | 6580  | 3 | 574.30  | -14.97 |
| Q8ZP54 RNB_SALTY Exoribonuclease 2                                 | 22 |                       | AVIKGEAIARPQEDITQQMAER      | 512 | 22 | 4  | 21.21 | y3y9°y9y10                                     | 2454.29 | 80.490  | 5134  | 3 | 818.77  | 4.08   |
| Q8ZP54 RNB_SALTY Exoribonuclease 2                                 | 23 |                       | KYGDMINHR                   | 500 | 9  | 6  | 58.77 | b3b4b6b7°b7b8                                  | 1133.54 | 32.042  | 4572  | 2 | 567.27  | -8.62  |
| Q8ZP54 RNB_SALTY Exoribonuclease 2                                 | 24 |                       | HNLEKEAPNGVATEMLDEGLER      | 167 | 22 | 3  | 11.33 | b10y5y8                                        | 2452.21 | 81.403  | 3924  | 3 | 818.07  | 12.84  |



|                                                  |    |                                                |                                                   |     |    |    |       |                                  |         |         |       |   |         |        |
|--------------------------------------------------|----|------------------------------------------------|---------------------------------------------------|-----|----|----|-------|----------------------------------|---------|---------|-------|---|---------|--------|
| Q8ZP54 RNB_SALTY Exoribonuclease 2               | 25 |                                                | LNRMAER                                           | 536 | 7  | 3  | 35.01 | b6y3y6                           | 889.47  | 23.201  | 3300  | 2 | 445.24  | 0.21   |
| Q8ZP54 RNB_SALTY Exoribonuclease 2               | 26 | Carbamidomethyl+C(43)                          | LGFGIYNVHTGFDPANADALAAL<br>LKTHGLHVDAAEVLTLLEGFCK | 407 | 44 | 10 | 44.02 | b6b11*b11y3y4y6°y6y7y8°<br>y8    | 4724.32 | 136.338 | 3109  | 4 | 1181.84 | -12.71 |
| Q8ZP54 RNB_SALTY Exoribonuclease 2               | 27 | Carbamidomethyl+C(12)                          | IVEESMIAANLCAARVLR                                | 387 | 18 | 5  | 45.85 | b5b6b7b8b14                      | 2016.07 | 76.742  | 2556  | 3 | 672.70  | -0.91  |
| Q8ZP54 RNB_SALTY Exoribonuclease 2               | 28 |                                                | DVGDWLYARFLNDK                                    | 543 | 14 | 3  | 15.39 | b8y3y12                          | 1711.84 | 83.343  | 2201  | 2 | 856.42  | -3.07  |
| Q8ZP54 RNB_SALTY Exoribonuclease 2               | 29 |                                                | FAAEIIDVSRGGMR                                    | 563 | 14 | 5  | 21.71 | b7°b7b9y8y11                     | 1521.77 | 53.535  | 2086  | 2 | 761.39  | -10.27 |
| Q8ZP54 RNB_SALTY Exoribonuclease 2               | 30 |                                                | GEAIARPQEDITQQMAERR                               | 516 | 19 | 3  | 12.16 | b3b12y4                          | 2199.12 | 86.739  | 2058  | 2 | 1100.07 | 14.10  |
| Q8ZP54 RNB_SALTY Exoribonuclease 2               | 31 | Carbamidomethyl+C(7);<br>Carbamidomethyl+C(20) | ELSDDLCSLRANEVRPALACR                             | 264 | 21 | 3  | 18.19 | b4b9b11                          | 2445.16 | 74.921  | 1646  | 3 | 815.73  | -14.88 |
| Q8ZP54 RNB_SALTY Exoribonuclease 2               | 32 |                                                | ATEKGFGFLEVDAQK                                   | 27  | 15 | 9  | 29.49 | b3°b3b5b8°b8y11°y11y13°<br>y13   | 1639.82 | 71.338  | 1557  | 2 | 820.41  | -9.08  |
| Q8ZP54 RNB_SALTY Exoribonuclease 2               | 33 | Phosphoryl STY(13)                             | RELDAQPSGFLDSR                                    | 453 | 14 | 3  | 23.17 | b4b11b12                         | 1670.73 | 87.411  | 4093  | 3 | 557.58  | -11.11 |
| Q8ZP54 RNB_SALTY Exoribonuclease 2               | 34 | Oxidation+M(15)                                | HNLEKEAPNGVATEMLDEGLER                            | 167 | 22 | 6  | 31.31 | b14y5y7y8y13y20                  | 2468.14 | 67.872  | 7153  | 2 | 1234.58 | -11.87 |
| Q8ZP54 RNB_SALTY Exoribonuclease 2               | 35 | Oxidation+M(15)                                | GEAIARPQEDITQQMAER                                | 516 | 18 | 5  | 24.18 | b6b7y7y10°y10                    | 2059.00 | 67.465  | 2662  | 3 | 687.00  | 5.10   |
| Q8ZP54 RNB_SALTY Exoribonuclease 2               | 36 | Oxidation+M(9)                                 | SYFIPPPQMK                                        | 42  | 10 | 10 | 78.89 | b3°b3b5b7y3y4y5*y5y6*y<br>6      | 1223.60 | 40.543  | 2265  | 3 | 408.54  | -7.68  |
| P05989 ILVC_SALTY Ketol-acid<br>reductoisomerase | 1  |                                                | GFGVPTLIAVHPENDPQGEGMAIA<br>K                     | 167 | 25 | 11 | 48.01 | b2b3b4y3y7y8y10y14°y14y<br>21y25 | 2548.29 | 78.008  | 44052 | 3 | 850.10  | 0.29   |
| P05989 ILVC_SALTY Ketol-acid<br>reductoisomerase | 2  |                                                | QGGITLMMDR                                        | 266 | 10 | 5  | 41.15 | b7°b7y3y5y8                      | 1121.55 | 61.801  | 25194 | 2 | 561.28  | 3.48   |
| P05989 ILVC_SALTY Ketol-acid<br>reductoisomerase | 3  |                                                | ANYFNTLNL                                         | 1   | 10 | 5  | 22.12 | b7b10y3y6y10                     | 1225.63 | 68.818  | 24288 | 2 | 613.32  | 0.20   |
| P05989 ILVC_SALTY Ketol-acid<br>reductoisomerase | 4  |                                                | LIQFGWETITEALK                                    | 252 | 14 | 3  | 15.39 | b3b7y3                           | 1648.89 | 102.435 | 21410 | 2 | 824.95  | -3.18  |
| P05989 ILVC_SALTY Ketol-acid<br>reductoisomerase | 5  |                                                | AYALSEQLK                                         | 284 | 9  | 8  | 33.25 | b1b2b5b7b8°b8y2y9                | 1022.54 | 48.811  | 8073  | 2 | 511.78  | -6.63  |
| P05989 ILVC_SALTY Ketol-acid<br>reductoisomerase | 6  |                                                | AYALSEQLKEIMAPLFQK                                | 284 | 18 | 7  | 19.85 | b2b8°b8b10b12°b12y7              | 2080.10 | 105.587 | 6014  | 3 | 694.04  | -8.33  |
| P05989 ILVC_SALTY Ketol-acid<br>reductoisomerase | 7  |                                                | DGAALGYSHGFNIVEVGEQIR                             | 123 | 21 | 4  | 11.55 | b3b5y12*y12                      | 2232.10 | 88.859  | 2728  | 3 | 744.71  | -1.75  |
| P05989 ILVC_SALTY Ketol-acid<br>reductoisomerase | 8  |                                                | AWAAATGGHR                                        | 192 | 10 | 6  | 51.61 | b2b4b6b9y5y8                     | 997.49  | 101.286 | 2538  | 1 | 997.49  | -3.85  |
| P05989 ILVC_SALTY Ketol-acid<br>reductoisomerase | 9  |                                                | TAFETAPQYEGK                                      | 336 | 12 | 7  | 38.89 | b4b6y2y3y5y8*y8                  | 1341.62 | 28.370  | 2158  | 3 | 447.88  | -11.92 |
| P05989 ILVC_SALTY Ketol-acid<br>reductoisomerase | 10 | Carbamidomethyl+C(6)                           | VVIVGCGAQGLNQLNMR                                 | 39  | 18 | 3  | 19.74 | y9y12y17                         | 1885.98 | 72.845  | 1810  | 2 | 943.49  | 0.78   |
| P05989 ILVC_SALTY Ketol-acid<br>reductoisomerase | 11 |                                                | AGVLESSFVAEVK                                     | 202 | 13 | 4  | 16.52 | b9°b9b11y3                       | 1335.70 | 37.159  | 1612  | 2 | 668.35  | -12.34 |
| P05989 ILVC_SALTY Ketol-acid<br>reductoisomerase | 12 |                                                | LSNPAK                                            | 276 | 6  | 2  | 11.88 | y5*y5                            | 629.37  | 38.015  | 20314 | 1 | 629.37  | 14.93  |
| P05989 ILVC_SALTY Ketol-acid<br>reductoisomerase | 13 |                                                | SVQPLMK                                           | 116 | 7  | 6  | 46.26 | b3°b3°b3b4y4y5                   | 802.43  | 37.160  | 8008  | 2 | 401.72  | -20.76 |
| P05989 ILVC_SALTY Ketol-acid<br>reductoisomerase | 14 |                                                | LLTWR                                             | 326 | 5  | 1  | 11.25 | y4                               | 688.42  | 55.130  | 4161  | 2 | 344.72  | 14.98  |
| P05989 ILVC_SALTY Ketol-acid<br>reductoisomerase | 15 |                                                | DSGLDISYALR                                       | 57  | 11 | 7  | 60.48 | b4b7b8b9°b9b10y9                 | 1209.62 | 46.808  | 3152  | 2 | 605.31  | 6.46   |
| P05989 ILVC_SALTY Ketol-acid<br>reductoisomerase | 16 |                                                | LVAEGTDPAYAEK                                     | 239 | 13 | 6  | 49.31 | b8b11y6y7y11y12                  | 1363.66 | 47.910  | 2696  | 2 | 682.33  | -12.98 |

|                                                                          |    |                                                      |                                        |     |    |    |       |                                 |         |         |       |   |         |        |
|--------------------------------------------------------------------------|----|------------------------------------------------------|----------------------------------------|-----|----|----|-------|---------------------------------|---------|---------|-------|---|---------|--------|
| [P05989]ILVC_SALTY Ketol-acid reductoisomerase                           | 17 |                                                      | VGTYEELIPQADLVVNLTDPDKQHS DVVR         | 88  | 28 | 8  | 36.94 | b11y5y6y10y12*y12y13y20         | 3135.61 | 82.449  | 32187 | 4 | 784.66  | -6.77  |
| [P05989]ILVC_SALTY Ketol-acid reductoisomerase                           | 18 | Carbamidomethyl+C(11)<br>;Carbamidomethyl+C(21)<br>) | SDLMGEQTILCGMLQAGSLLCFD KLVAEGTDPAYAEK | 215 | 37 | 6  | 20.28 | b3b5y6*y6y7y9                   | 4031.92 | 118.517 | 15225 | 3 | 1344.64 | 1.57   |
| [P05989]ILVC_SALTY Ketol-acid reductoisomerase                           | 19 |                                                      | ANYFNTLNLRQQLAQLGK                     | 1   | 18 | 4  | 19.85 | b9b12b15y3                      | 2092.13 | 90.552  | 9512  | 2 | 1046.57 | -2.10  |
| [P05989]ILVC_SALTY Ketol-acid reductoisomerase                           | 20 | Carbamidomethyl+C(7)                                 | KVVIVGCGAQGLNQGLNMR                    | 38  | 19 | 3  | 21.34 | y3y9y10                         | 2014.09 | 59.808  | 4660  | 2 | 1007.55 | 9.09   |
| [P05989]ILVC_SALTY Ketol-acid reductoisomerase                           | 21 |                                                      | AWAAATGGHRAGVLESSFVAEV K               | 192 | 23 | 7  | 13.64 | b7°b7b10y4°y4y8°y8              | 2314.21 | 46.009  | 1538  | 6 | 386.54  | 7.17   |
| [P05989]ILVC_SALTY Ketol-acid reductoisomerase                           | 22 | Phosphoryl STY(5)                                    | AYALSEQLK                              | 284 | 9  | 3  | 25.47 | b3b7y4                          | 1102.52 | 29.651  | 2772  | 2 | 551.77  | 13.73  |
| [P05989]ILVC_SALTY Ketol-acid reductoisomerase                           | 23 | Phosphoryl STY(10)                                   | LIQFGWETITEALK                         | 252 | 14 | 3  | 15.39 | b10y3y10_HPO3 y10               | 1728.85 | 69.880  | 2324  | 2 | 864.93  | -0.14  |
| [P05989]ILVC_SALTY Ketol-acid reductoisomerase                           | 24 | Oxidation+M()                                        | GVLMIAMVK                              | 357 | 9  | 3  | 25.47 | b3b7y6                          | 977.56  | 62.621  | 25821 | 2 | 489.28  | 7.87   |
| [P05989]ILVC_SALTY Ketol-acid reductoisomerase                           | 25 | Oxidation+M(6)                                       | SVQPLMKDGAALGYSHGFNIVEV GEQIR          | 116 | 28 | 8  | 21.74 | b3*b3b8°b8b9b11y7°y7            | 3031.56 | 136.347 | 5107  | 3 | 1011.19 | 10.23  |
| [P05989]ILVC_SALTY Ketol-acid reductoisomerase                           | 26 |                                                      | PTLIAVHPENDPQGEGMAIAK                  | 171 | 21 | 2  | 12.73 | b11b14                          | 2188.10 | 78.058  | 3319  | 2 | 1094.55 | -4.46  |
| [P02911]ARGT_SALTY Lysine-arginine-ornithine-binding periplasmic protein | 1  | Carbamidomethyl+C(1)                                 | CTWVASDFDALIPSLK                       | 66  | 16 | 3  | 13.71 | b11b14y4                        | 1822.92 | 99.119  | 22161 | 2 | 911.96  | 9.78   |
| [P02911]ARGT_SALTY Lysine-arginine-ornithine-binding periplasmic protein | 2  |                                                      | QQEIAFSDK                              | 99  | 9  | 4  | 33.25 | y4y5y8*y8                       | 1065.52 | 63.288  | 16106 | 2 | 533.27  | 2.41   |
| [P02911]ARGT_SALTY Lysine-arginine-ornithine-binding periplasmic protein | 3  |                                                      | IGTDTTYAPFSSK                          | 29  | 13 | 12 | 59.77 | b2b5b9y3y4°y4y5°y5y11°y11y12y13 | 1387.68 | 53.538  | 15015 | 2 | 694.34  | 1.23   |
| [P02911]ARGT_SALTY Lysine-arginine-ornithine-binding periplasmic protein | 4  |                                                      | EYAFAGPSVKDK                           | 198 | 12 | 7  | 25.14 | b2b3b10b11b12°b12y12            | 1311.64 | 59.812  | 7561  | 2 | 656.32  | -14.33 |
| [P02911]ARGT_SALTY Lysine-arginine-ornithine-binding periplasmic protein | 5  |                                                      | QPAGKEYAFAGPSVK                        | 193 | 15 | 3  | 22.55 | b9b11b13                        | 1549.82 | 75.533  | 6994  | 2 | 775.41  | 11.74  |
| [P02911]ARGT_SALTY Lysine-arginine-ornithine-binding periplasmic protein | 6  |                                                      | IGTDTTYAPFSSKDAK                       | 29  | 16 | 3  | 13.71 | b6y3y6                          | 1701.85 | 56.815  | 2425  | 2 | 851.43  | 7.96   |
| [P02911]ARGT_SALTY Lysine-arginine-ornithine-binding periplasmic protein | 7  |                                                      | ALTELK                                 | 234 | 6  | 1  | 11.88 | b4                              | 702.41  | 42.385  | 7051  | 1 | 702.41  | -7.65  |
| [P02911]ARGT_SALTY Lysine-arginine-ornithine-binding periplasmic protein | 8  |                                                      | YFGDGTGVGLR                            | 211 | 11 | 5  | 44    | y3y7°y7y8y10                    | 1141.55 | 49.585  | 4593  | 2 | 571.28  | -10.69 |
| [P02911]ARGT_SALTY Lysine-arginine-ornithine-binding periplasmic protein | 9  |                                                      | HVGVLQGSTQEAYANDNWR                    | 134 | 19 | 8  | 39.48 | b4b10b12°b12*b12b13°b13b14      | 2145.05 | 70.770  | 2310  | 2 | 1073.03 | 19.35  |
| [P02911]ARGT_SALTY Lysine-arginine-ornithine-binding periplasmic protein | 10 |                                                      | DDTELK                                 | 223 | 6  | 2  | 23.13 | y4y5                            | 720.35  | 33.872  | 1685  | 1 | 720.35  | 10.85  |
| [P02911]ARGT_SALTY Lysine-arginine-ornithine-binding periplasmic protein | 11 |                                                      | LDAALQDEVAASEGFLKQPAGK                 | 176 | 22 | 4  | 16.79 | b3b7b21y5                       | 2258.19 | 85.859  | 8106  | 3 | 753.40  | 12.22  |
| [P02911]ARGT_SALTY Lysine-arginine-ornithine-binding periplasmic protein | 12 |                                                      | RQQEIAFSDK                             | 98  | 10 | 8  | 43.83 | b4*b4b8°b8b9°b9y4y7             | 1221.62 | 69.944  | 6039  | 2 | 611.31  | -0.90  |

|                                                                                         |    |                       |                                   |     |    |    |       |                                            |         |         |       |   |         |        |
|-----------------------------------------------------------------------------------------|----|-----------------------|-----------------------------------|-----|----|----|-------|--------------------------------------------|---------|---------|-------|---|---------|--------|
| P02911 ARGT_SALTY Lysine-arginine-ornithine-binding periplasmic protein                 | 13 |                       | HVGVLQGSTQEAYANDNWRTK             | 134 | 21 | 4  | 17.4  | b4y9y12y14                                 | 2374.13 | 86.982  | 3425  | 2 | 1187.57 | -8.95  |
| P02911 ARGT_SALTY Lysine-arginine-ornithine-binding periplasmic protein                 | 14 |                       | IGTDTTYAPFSSKDAK                  | 29  | 16 | 3  | 21.42 | b3b5b10                                    | 1701.83 | 103.516 | 1673  | 2 | 851.42  | -3.87  |
| P02911 ARGT_SALTY Lysine-arginine-ornithine-binding periplasmic protein                 | 15 |                       | QQEIAFSDKLYAADSR                  | 99  | 16 | 4  | 20.25 | b13*b13b14y10                              | 1841.90 | 48.832  | 1654  | 2 | 921.45  | -2.78  |
| P02911 ARGT_SALTY Lysine-arginine-ornithine-binding periplasmic protein                 | 16 |                       | ALTELQRQDGYDK                     | 234 | 13 | 6  | 26.23 | b9°b9*b9y3y6y7                             | 1509.73 | 42.417  | 1606  | 2 | 755.37  | -13.91 |
| P02911 ARGT_SALTY Lysine-arginine-ornithine-binding periplasmic protein                 | 17 | Phosphoryl STY()      | IGTDTTYAPFSSKDAK                  | 29  | 16 | 9  | 40.4  | b6°b6b8b9°b9b10_H3PO4<br>b10°b10y3y10      | 1781.81 | 42.446  | 1670  | 3 | 594.61  | 10.35  |
| P0A2F6 SSB_SALTY Single-stranded DNA-binding protein                                    | 1  |                       | GSQVYIEGQLR                       | 74  | 11 | 7  | 31.78 | b3b8y1y2y5*y5y6                            | 1249.66 | 31.952  | 36186 | 3 | 417.23  | 6.84   |
| P0A2F6 SSB_SALTY Single-stranded DNA-binding protein                                    | 2  |                       | YTTEINVPQIGGVMMQLGGR              | 97  | 20 | 7  | 21.52 | b7°b7b10b14y4y10y20                        | 2164.11 | 97.268  | 27285 | 2 | 1082.56 | 9.70   |
| P0A2F6 SSB_SALTY Single-stranded DNA-binding protein                                    | 3  |                       | VILVGNLQDPEVR                     | 8   | 14 | 11 | 64.07 | b3y2y4y7y8y9°y9y10*y10y11*y11              | 1508.84 | 66.351  | 13272 | 2 | 754.92  | -1.70  |
| P0A2F6 SSB_SALTY Single-stranded DNA-binding protein                                    | 4  |                       | YMPSGGAVANLTLATSESWR              | 22  | 20 | 3  | 11.82 | b4y4y17                                    | 2111.01 | 72.774  | 9043  | 3 | 704.34  | -7.98  |
| P0A2F6 SSB_SALTY Single-stranded DNA-binding protein                                    | 5  |                       | WTDQSGQER                         | 88  | 9  | 5  | 25.47 | b3y2y4°y4y7                                | 1106.47 | 21.411  | 3421  | 2 | 553.74  | -11.03 |
| P0A2F6 SSB_SALTY Single-stranded DNA-binding protein                                    | 6  |                       | YMPSGGAVANLTLATSESWRDK            | 22  | 22 | 15 | 71.6  | b3b4b11b12b13°b13b14°b14°b14y4y6°y6y8y9°y9 | 2354.16 | 60.595  | 12862 | 3 | 785.39  | 8.61   |
| P0A2F6 SSB_SALTY Single-stranded DNA-binding protein                                    | 7  |                       | EQTEWHRVVMFGK                     | 50  | 13 | 3  | 21.29 | b10b11y12                                  | 1646.81 | 136.730 | 3974  | 1 | 1646.81 | -0.30  |
| P0A2F6 SSB_SALTY Single-stranded DNA-binding protein                                    | 8  |                       | VILVGNLQDPEVRYMPSGGAVANLTLATSESWR | 8   | 34 | 3  | 17.3  | y5y8y11                                    | 3600.80 | 119.547 | 2994  | 4 | 900.96  | -13.36 |
| P0A2F6 SSB_SALTY Single-stranded DNA-binding protein                                    | 9  | Phosphoryl STY(8)     | LAEVAGEYLRK                       | 63  | 11 | 3  | 19.74 | b6y5_H3PO4<br>y5y7_H3PO4 y7                | 1328.66 | 67.900  | 9635  | 2 | 664.83  | 2.66   |
| Q9L6N1 METE_SALTY 5-methyltetrahydropteroyltriglutamate--homocysteine methyltransferase | 1  | Carbamidomethyl+C(7)  | LWVNPDCLGK                        | 719 | 10 | 6  | 49.4  | b6y4y6y7y8y10                              | 1201.60 | 61.312  | 75009 | 2 | 601.31  | -0.61  |
| Q9L6N1 METE_SALTY 5-methyltetrahydropteroyltriglutamate--homocysteine methyltransferase | 2  | Carbamidomethyl+C(11) | GMLTGPVTILCWSFPR                  | 549 | 16 | 6  | 13.71 | b6y1y5°y7y10y16                            | 1834.94 | 100.251 | 38382 | 2 | 917.98  | 4.92   |
| Q9L6N1 METE_SALTY 5-methyltetrahydropteroyltriglutamate--homocysteine methyltransferase | 3  |                       | QAGIDLLPVGDFAWYDHVLTTSLLGNVPAR    | 52  | 31 | 15 | 53.9  | b5°b5°b5b6°b6b7°b7b14y3y5y6y7*y7y24y31     | 3351.78 | 119.961 | 37151 | 3 | 1117.93 | 1.24   |
| Q9L6N1 METE_SALTY 5-methyltetrahydropteroyltriglutamate--homocysteine methyltransferase | 4  |                       | LAAITAQDSQRENPYEVR                | 395 | 18 | 12 | 48.97 | b3b5b8°b8b9°b9b11y2y5°y5y14y16             | 2061.02 | 47.957  | 21871 | 3 | 687.68  | -9.36  |
| Q9L6N1 METE_SALTY 5-methyltetrahydropteroyltriglutamate--homocysteine methyltransferase | 5  |                       | APTGEPA AAAAEMTK                  | 103 | 14 | 10 | 83.69 | b6b7b8b11°b11b12b13y7y9y12                 | 1344.64 | 39.745  | 16464 | 2 | 672.83  | -1.45  |
| Q9L6N1 METE_SALTY 5-methyltetrahydropteroyltriglutamate--homocysteine methyltransferase | 6  |                       | LAAITAQDSQR                       | 395 | 11 | 7  | 30.2  | b2b3y2y3y7y8y11                            | 1173.62 | 34.549  | 13899 | 2 | 587.31  | -0.73  |
| Q9L6N1 METE_SALTY 5-methyltetrahydropteroyltriglutamate--homocysteine methyltransferase | 7  |                       | GNLDANHYR                         | 449 | 9  | 3  | 25.47 | b4b7y6                                     | 1059.49 | 26.601  | 1948  | 2 | 530.25  | -5.07  |
| Q9L6N1 METE_SALTY 5-methyltetrahydropteroyltriglutamate--homocysteine methyltransferase | 8  |                       | AQESYWAGNTTREALAVGR               | 21  | 20 | 5  | 21.24 | b3°b3b4b12y20                              | 2193.09 | 51.326  | 1806  | 3 | 731.70  | -7.68  |

|                                                                                         |    |                                             |                        |     |    |   |       |                        |         |         |       |   |         |        |
|-----------------------------------------------------------------------------------------|----|---------------------------------------------|------------------------|-----|----|---|-------|------------------------|---------|---------|-------|---|---------|--------|
| Q9L6N1 METE_SALTY 5-methyltetrahydropteroyltriglutamate--homocysteine methyltransferase | 9  | Carbamidomethyl+C(8)                        | ALWVASSCSLLHSPIDLSVETR | 315 | 22 | 3 | 20.08 | b10b11y8               | 2441.24 | 104.722 | 39159 | 4 | 611.07  | -2.50  |
| Q9L6N1 METE_SALTY 5-methyltetrahydropteroyltriglutamate--homocysteine methyltransferase | 10 |                                             | YAQSLTDKPKVK           | 538 | 11 | 3 | 26.73 | b7b9b10                | 1249.70 | 61.268  | 34848 | 2 | 625.35  | 18.85  |
| Q9L6N1 METE_SALTY 5-methyltetrahydropteroyltriglutamate--homocysteine methyltransferase | 11 |                                             | GQQFR                  | 132 | 5  | 1 | 11.25 | y4                     | 635.33  | 42.554  | 19897 | 1 | 635.33  | 1.92   |
| Q9L6N1 METE_SALTY 5-methyltetrahydropteroyltriglutamate--homocysteine methyltransferase | 12 |                                             | WFNTNYHYIYPEFSK        | 117 | 15 | 4 | 14.47 | b9y6y9°y9              | 1944.89 | 52.794  | 17999 | 2 | 972.95  | -19.39 |
| Q9L6N1 METE_SALTY 5-methyltetrahydropteroyltriglutamate--homocysteine methyltransferase | 13 |                                             | AQESYWAGNTTR           | 21  | 12 | 9 | 55.67 | b4°b4y6y7*y7y8y9°y9y11 | 1383.63 | 41.594  | 13771 | 2 | 692.32  | 0.53   |
| Q9L6N1 METE_SALTY 5-methyltetrahydropteroyltriglutamate--homocysteine methyltransferase | 14 |                                             | ADLTEK                 | 298 | 6  | 3 | 34.38 | b3y4y5                 | 676.35  | 32.955  | 5330  | 1 | 676.35  | -1.62  |
| Q9L6N1 METE_SALTY 5-methyltetrahydropteroyltriglutamate--homocysteine methyltransferase | 15 |                                             | SDWDAYLEWGVAEFR        | 611 | 15 | 6 | 36.3  | b14y4y8y9°y9y10        | 1843.85 | 60.589  | 4375  | 3 | 615.29  | 13.04  |
| Q9L6N1 METE_SALTY 5-methyltetrahydropteroyltriglutamate--homocysteine methyltransferase | 16 |                                             | GWPETR                 | 731 | 6  | 3 | 23.13 | b5y5°y5                | 745.36  | 59.792  | 2409  | 1 | 745.36  | -8.19  |
| Q9L6N1 METE_SALTY 5-methyltetrahydropteroyltriglutamate--homocysteine methyltransferase | 17 |                                             | DEVADLEAAGIGIIQIDEPALR | 582 | 22 | 7 | 27.39 | b7b9°b9b12b20y6y9      | 2308.16 | 46.736  | 2392  | 6 | 385.53  | -18.19 |
| Q9L6N1 METE_SALTY 5-methyltetrahydropteroyltriglutamate--homocysteine methyltransferase | 18 |                                             | LDTEVK                 | 337 | 6  | 1 | 11.88 | b4                     | 704.39  | 22.398  | 2229  | 1 | 704.39  | 10.74  |
| Q9L6N1 METE_SALTY 5-methyltetrahydropteroyltriglutamate--homocysteine methyltransferase | 19 |                                             | VHNAAVEK               | 386 | 8  | 3 | 30.87 | b5b7y4                 | 867.48  | 62.580  | 2181  | 2 | 434.24  | 16.53  |
| Q9L6N1 METE_SALTY 5-methyltetrahydropteroyltriglutamate--homocysteine methyltransferase | 20 |                                             | DALNSGETAALEEWSAPIQAR  | 360 | 21 | 4 | 11.55 | b6°b6b10y13            | 2229.09 | 80.709  | 2039  | 3 | 743.70  | 4.93   |
| Q9L6N1 METE_SALTY 5-methyltetrahydropteroyltriglutamate--homocysteine methyltransferase | 21 |                                             | FKLPAPWPTTTIGSFQPTTEIR | 420 | 21 | 6 | 25.72 | b14y3y5y7*y7y13        | 2391.26 | 89.509  | 22732 | 3 | 797.76  | -6.53  |
| Q9L6N1 METE_SALTY 5-methyltetrahydropteroyltriglutamate--homocysteine methyltransferase | 22 |                                             | KGNLDANHYR             | 448 | 10 | 4 | 33.37 | b5b6b9y4               | 1187.60 | 41.645  | 4831  | 2 | 594.30  | 4.63   |
| Q9L6N1 METE_SALTY 5-methyltetrahydropteroyltriglutamate--homocysteine methyltransferase | 23 |                                             | TRGWPETR               | 729 | 8  | 5 | 43.88 | b6b7y5°y5y7            | 1002.50 | 69.044  | 4343  | 1 | 1002.50 | -9.19  |
| Q9L6N1 METE_SALTY 5-methyltetrahydropteroyltriglutamate--homocysteine methyltransferase | 24 |                                             | ARHWEQQK               | 44  | 8  | 4 | 30.87 | b3b7y3*y3              | 1082.55 | 26.528  | 3890  | 3 | 361.52  | 1.69   |
| Q9L6N1 METE_SALTY 5-methyltetrahydropteroyltriglutamate--homocysteine methyltransferase | 25 |                                             | GRAPTGEPAAAAEMTK       | 101 | 16 | 6 | 18.85 | b11°b11b13°b13y4y9     | 1557.79 | 40.621  | 2131  | 2 | 779.40  | 11.13  |
| Q9L6N1 METE_SALTY 5-methyltetrahydropteroyltriglutamate--homocysteine methyltransferase | 26 | Phosphoryl STY(8)                           | DALNSGETAALEEWSAPIQARR | 360 | 22 | 3 | 20.08 | b6b7y11                | 2465.17 | 95.475  | 24357 | 2 | 1233.09 | 14.56  |
| Q9L6N1 METE_SALTY 5-methyltetrahydropteroyltriglutamate--homocysteine methyltransferase | 27 | Carbamidomethyl+C(11)<br>;Phosphoryl STY(8) | GMLTGPVTILCWSFPR       | 549 | 16 | 4 | 22.25 | b4b7b10_H3PO4 b10y7    | 1914.91 | 54.301  | 1541  | 2 | 957.96  | 12.18  |

|                                                                                         |    |                                                                   |                                        |     |    |    |       |                                 |         |         |       |   |         |        |
|-----------------------------------------------------------------------------------------|----|-------------------------------------------------------------------|----------------------------------------|-----|----|----|-------|---------------------------------|---------|---------|-------|---|---------|--------|
| Q9L6N1 METE_SALTY 5-methyltetrahydropteroyltriglutamate--homocysteine methyltransferase | 28 | Phosphoryl STY(11)                                                | LPAPWPTTTIGSFPQTTEIR                   | 422 | 19 | 3  | 19.94 | b12b13y7                        | 2196.07 | 81.725  | 1530  | 2 | 1098.54 | 1.22   |
| Q9L6N1 METE_SALTY 5-methyltetrahydropteroyltriglutamate--homocysteine methyltransferase | 29 | Oxidation+M(12)                                                   | APTGEPA AAAEMTK                        | 103 | 14 | 4  | 15.39 | b5y7°y7y9                       | 1360.64 | 26.624  | 40399 | 2 | 680.83  | 1.88   |
| Q9L6N1 METE_SALTY 5-methyltetrahydropteroyltriglutamate--homocysteine methyltransferase | 30 | Carbamidomethyl+C(11);Oxidation+M(2)                              | GMLTGPVTILCWSFPR                       | 549 | 16 | 4  | 13.71 | b11°b11y5y13                    | 1850.93 | 64.199  | 3983  | 3 | 617.65  | -1.65  |
| Q9L6N1 METE_SALTY 5-methyltetrahydropteroyltriglutamate--homocysteine methyltransferase | 31 |                                                                   | LAAITAQDSQ                             | 395 | 10 | 1  | 7.24  | y5                              | 1017.52 | 34.539  | 4586  | 2 | 509.26  | -1.62  |
| P53636 SODC1_SALTY Superoxide dismutase [Cu-Zn] 1                                       | 1  |                                                                   | GGDNYSDKPAPLGGGGAR                     | 151 | 18 | 11 | 86.41 | b2y5y6y7y8y10y11y12y13°y13y18   | 1688.77 | 33.854  | 84722 | 3 | 563.60  | -14.31 |
| P53636 SODC1_SALTY Superoxide dismutase [Cu-Zn] 1                                       | 2  | Carbamidomethyl+C(3)                                              | FACGVIEK                               | 169 | 8  | 11 | 58.14 | b2y1y2°y2y3y4y5y6°y6y7y8        | 923.46  | 41.646  | 70555 | 2 | 462.23  | -10.51 |
| P53636 SODC1_SALTY Superoxide dismutase [Cu-Zn] 1                                       | 3  |                                                                   | EVPALMAGGHLDPEK                        | 84  | 15 | 5  | 14.47 | b6y7y11°y13y15                  | 1563.78 | 57.986  | 16441 | 2 | 782.39  | -0.62  |
| P53636 SODC1_SALTY Superoxide dismutase [Cu-Zn] 1                                       | 4  |                                                                   | HLGPYNDK                               | 102 | 8  | 5  | 27.86 | b2b5b6°b6y6                     | 943.46  | 69.945  | 4241  | 1 | 943.46  | -0.97  |
| P53636 SODC1_SALTY Superoxide dismutase [Cu-Zn] 1                                       | 5  |                                                                   | GHLGDLPLGVVNADGTATYPLLA PR             | 110 | 25 | 8  | 45.7  | b3b4b5b10b15°b15b16°b16         | 2517.30 | 86.309  | 11893 | 4 | 630.08  | -17.17 |
| P53636 SODC1_SALTY Superoxide dismutase [Cu-Zn] 1                                       | 6  |                                                                   | GHSLMIHKG GDNYS DKPAPLGGG GAR          | 143 | 26 | 3  | 10.93 | b13y6y20                        | 2592.26 | 76.753  | 3487  | 4 | 648.82  | -6.50  |
| P53636 SODC1_SALTY Superoxide dismutase [Cu-Zn] 1                                       | 7  |                                                                   | TGKHLGPYNDK                            | 99  | 11 | 7  | 47.01 | b9b10°b10y5y7°y7y10             | 1229.65 | 45.979  | 2968  | 2 | 615.33  | 14.89  |
| P53636 SODC1_SALTY Superoxide dismutase [Cu-Zn] 1                                       | 8  | Oxidation+M(6)                                                    | EVPALMAGGHLDPEK                        | 84  | 15 | 7  | 29.49 | b3°b3b6b8y9y11°y11              | 1579.79 | 67.048  | 6113  | 2 | 790.40  | 10.28  |
| P53636 SODC1_SALTY Superoxide dismutase [Cu-Zn] 1                                       | 9  | Oxidation+M(9)                                                    | DGKEVPALMAGGHLDPEK                     | 81  | 18 | 3  | 12.58 | b11y4y12                        | 1879.92 | 79.205  | 2155  | 3 | 627.31  | -0.84  |
| P26983 RP5M_SALTY Probable sigma(54) modulation protein                                 | 1  |                                                                   | LEQYFER                                | 26  | 7  | 13 | 46.26 | b2b3°b4°b4b5°b5b7y2°y2y3°y3y4y7 | 984.47  | 46.765  | 21265 | 2 | 492.74  | -6.70  |
| P26983 RP5M_SALTY Probable sigma(54) modulation protein                                 | 2  |                                                                   | MQLNITGHNVEITEALREFVTTK                | 0   | 23 | 8  | 31.78 | b2b6°b6b7°b7b8b13y6             | 2644.40 | 88.339  | 9355  | 3 | 882.14  | 7.57   |
| P26983 RP5M_SALTY Probable sigma(54) modulation protein                                 | 3  |                                                                   | FAKLEQYFER                             | 23  | 10 | 7  | 32.58 | b7°b7°b7b9y3y7°y7               | 1330.66 | 48.837  | 4601  | 3 | 444.23  | -11.38 |
| P26983 RP5M_SALTY Probable sigma(54) modulation protein                                 | 4  |                                                                   | VTHISDATLHVNGGEIHASAEQD MYAAIDGLIDKLAR | 45  | 38 | 4  | 24.79 | b6°b6b7b13                      | 3988.95 | 96.624  | 3756  | 3 | 1330.32 | -8.14  |
| Q8ZRC0 CLPX_SALTY ATP-dependent Clp protease ATP-binding subunit clpX                   | 1  | Carbamidomethyl+C(10);Carbamidomethyl+C(13);Carbamidomethyl+C(17) | LIAGPSVYICDECVDLCNDIREEIK              | 27  | 26 | 3  | 10.93 | b3b8y10                         | 3094.52 | 61.893  | 12532 | 4 | 774.38  | 8.44   |
| Q8ZRC0 CLPX_SALTY ATP-dependent Clp protease ATP-binding subunit clpX                   | 2  |                                                                   | EEIKEVAPHRER                           | 49  | 12 | 8  | 30.95 | b1b4b6°b6b11y2°y2y7             | 1492.78 | 46.818  | 11891 | 3 | 498.26  | -7.11  |
| Q8ZRC0 CLPX_SALTY ATP-dependent Clp protease ATP-binding subunit clpX                   | 3  |                                                                   | SNILLIGPTGSGK                          | 112 | 13 | 11 | 33.29 | b1b3°b3°b3b12y2y4y7°y7y8°y8     | 1256.71 | 62.671  | 9059  | 2 | 628.86  | -8.64  |
| Q8ZRC0 CLPX_SALTY ATP-dependent Clp protease ATP-binding subunit clpX                   | 4  |                                                                   | THLDDYVIGQEQA K                        | 71  | 14 | 4  | 15.39 | b2b4b10y4                       | 1616.81 | 58.161  | 4966  | 3 | 539.61  | 9.14   |
| Q8ZRC0 CLPX_SALTY ATP-dependent Clp protease ATP-binding subunit clpX                   | 5  |                                                                   | LLDVPFTMADATTLTEAGYVGED VENIIQK        | 134 | 30 | 7  | 19.33 | b10°b10y1y3y6y10y25             | 3253.59 | 110.596 | 4747  | 3 | 1085.20 | -8.48  |
| Q8ZRC0 CLPX_SALTY ATP-dependent Clp protease ATP-binding subunit clpX                   | 6  | Carbamidomethyl+C(4);Carbamidomethyl+C(7)                         | LLYCSFCGK                              | 11  | 9  | 3  | 25.47 | b4b7y4                          | 1147.51 | 97.402  | 1562  | 1 | 1147.51 | -12.55 |

|                                                                       |    |                                                      |                                             |     |    |    |       |                                     |         |         |       |   |         |        |
|-----------------------------------------------------------------------|----|------------------------------------------------------|---------------------------------------------|-----|----|----|-------|-------------------------------------|---------|---------|-------|---|---------|--------|
| Q8ZRC0 CLPX_SALTY ATP-dependent Clp protease ATP-binding subunit clpX | 7  |                                                      | HPQQEFLQVDTSK                               | 229 | 13 | 10 | 33.29 | b5°b5b8y7y8°y8*y8y10°y10*y10        | 1556.79 | 69.015  | 78468 | 3 | 519.60  | 12.62  |
| Q8ZRC0 CLPX_SALTY ATP-dependent Clp protease ATP-binding subunit clpX | 8  |                                                      | VVIDESVIAGQSKPLLIYGKPEAQA<br>SGE            | 395 | 28 | 3  | 10.94 | b7b12y8                             | 2898.52 | 105.902 | 27351 | 4 | 725.38  | -10.53 |
| Q8ZRC0 CLPX_SALTY ATP-dependent Clp protease ATP-binding subunit clpX | 9  |                                                      | QYQALFNLEGVDLEFR                            | 335 | 16 | 3  | 20.25 | b7b8y6                              | 1942.00 | 60.663  | 4199  | 2 | 971.50  | 16.53  |
| Q8ZRC0 CLPX_SALTY ATP-dependent Clp protease ATP-binding subunit clpX | 10 |                                                      | ASEGELLSQVEPEDLIK                           | 280 | 17 | 4  | 13.09 | b3b6°b6y11                          | 1856.93 | 60.643  | 2930  | 2 | 928.97  | -10.72 |
| Q8ZRC0 CLPX_SALTY ATP-dependent Clp protease ATP-binding subunit clpX | 11 |                                                      | VLAVAVYNHYK                                 | 86  | 11 | 4  | 26.73 | y4y5y7*y7                           | 1276.70 | 63.207  | 2042  | 3 | 426.24  | -6.50  |
| Q8ZRC0 CLPX_SALTY ATP-dependent Clp protease ATP-binding subunit clpX | 12 |                                                      | SIVEAALLDTMYDLPSMEDVEK                      | 373 | 22 | 8  | 37.55 | b6b13y4y7y9y11y13°y13               | 2469.14 | 118.783 | 1603  | 2 | 1235.07 | -16.41 |
| Q8ZRC0 CLPX_SALTY ATP-dependent Clp protease ATP-binding subunit clpX | 13 |                                                      | SALPTPHEIRTHLDDYVIGQEQAk                    | 61  | 24 | 7  | 21.99 | b3°b3b7y7y10y11°y11                 | 2718.35 | 94.379  | 92813 | 3 | 906.79  | -13.29 |
| Q8ZRC0 CLPX_SALTY ATP-dependent Clp protease ATP-binding subunit clpX | 14 | Carbamidomethyl+C(9);<br>Carbamidomethyl+C(12)       | DGSGKLLYCSFCGK                              | 6   | 14 | 3  | 20.83 | b10b11y10                           | 1591.72 | 90.626  | 17381 | 2 | 796.36  | -2.84  |
| Q8ZRC0 CLPX_SALTY ATP-dependent Clp protease ATP-binding subunit clpX | 15 |                                                      | TGARGLR                                     | 366 | 7  | 5  | 49.27 | b3°b3b6y4y5                         | 730.43  | 30.709  | 5132  | 1 | 730.43  | -4.93  |
| Q8ZRC0 CLPX_SALTY ATP-dependent Clp protease ATP-binding subunit clpX | 16 | Carbamidomethyl+C(4);<br>Carbamidomethyl+C(7)        | LLYCSFCGKSQHEVR                             | 11  | 15 | 12 | 41.99 | b5°b5b9y6°y6*y6y9°y9y10°y10*y10y11  | 1883.91 | 60.605  | 3779  | 3 | 628.64  | 8.88   |
| Q8ZRC0 CLPX_SALTY ATP-dependent Clp protease ATP-binding subunit clpX | 17 |                                                      | SDNPSITRDVSGEGVQQALLK                       | 192 | 21 | 5  | 43.12 | b9b10b11b12y20                      | 2214.11 | 70.820  | 3614  | 3 | 738.71  | -11.25 |
| Q8ZRC0 CLPX_SALTY ATP-dependent Clp protease ATP-binding subunit clpX | 18 |                                                      | LRNGDTSNGVELGK                              | 98  | 14 | 6  | 27.15 | b6b11y12y13°y13*y13                 | 1459.76 | 60.648  | 2503  | 2 | 730.38  | 5.52   |
| Q8ZRC0 CLPX_SALTY ATP-dependent Clp protease ATP-binding subunit clpX | 19 | Carbamidomethyl+C(5)                                 | LLQKCDYDVQK                                 | 164 | 11 | 4  | 31.5  | y4y7y9°y9                           | 1409.70 | 45.991  | 1674  | 2 | 705.35  | -5.28  |
| Q8ZRC0 CLPX_SALTY ATP-dependent Clp protease ATP-binding subunit clpX | 20 | Phosphoryl STY(6)                                    | TLLAETLAR                                   | 125 | 9  | 5  | 37.97 | b5b8°b8y4_H3PO4 y4y7                | 1067.56 | 46.779  | 3509  | 2 | 534.28  | 14.98  |
| Q8ZRC0 CLPX_SALTY ATP-dependent Clp protease ATP-binding subunit clpX | 21 |                                                      | EEIKEVAPHR                                  | 49  | 10 | 0  | 4.4   |                                     | 1207.64 | 46.786  | 3359  | 3 | 403.22  | -1.82  |
| P26982 DEGP_SALTY Protease do                                         | 1  |                                                      | AGDVITSLNGKPISSFAALR                        | 332 | 20 | 9  | 45.51 | b3b4y1y4y6y7y9y15y20                | 2017.08 | 75.564  | 47053 | 3 | 673.03  | -13.50 |
| P26982 DEGP_SALTY Protease do                                         | 2  |                                                      | SDIALIQQNPK                                 | 160 | 12 | 5  | 29.86 | b3b4y3y6y12                         | 1339.76 | 64.683  | 31896 | 2 | 670.38  | -0.82  |
| P26982 DEGP_SALTY Protease do                                         | 3  |                                                      | AQVGTMPIVGSK                                | 352 | 11 | 11 | 47.47 | b1b2*b2b10y1y3°y3y5y8y9y11          | 1074.56 | 35.235  | 27648 | 2 | 537.78  | -5.23  |
| P26982 DEGP_SALTY Protease do                                         | 4  |                                                      | VGDYTVIAIGNPFLGETVTSGIVS<br>ALGR            | 186 | 28 | 15 | 54.71 | b2b3b4b6°b6b7b8b11°b11y2y3y5y6y8y28 | 2750.42 | 117.082 | 25603 | 3 | 917.48  | -5.06  |
| P26982 DEGP_SALTY Protease do                                         | 5  |                                                      | ILDSKPSVLALNIQR                             | 450 | 15 | 4  | 14.47 | b2b3y5y10                           | 1666.96 | 66.097  | 21673 | 3 | 556.33  | -14.72 |
| P26982 DEGP_SALTY Protease do                                         | 6  |                                                      | GAFVSQVMPNSSAAK                             | 313 | 15 | 10 | 47.27 | b8°b8b10°b10b12y2y8y9y10y15         | 1493.75 | 53.618  | 12107 | 2 | 747.38  | 3.92   |
| P26982 DEGP_SALTY Protease do                                         | 7  | Carbamidomethyl+C(13);<br>Carbamidomethyl+C(25)<br>) | NFQQFFGDDSPFCQDGSPFQNSPF<br>CQGGGNGGNGGQQQK | 71  | 39 | 7  | 28.84 | b3b4b6y3y5y14y15                    | 4240.75 | 91.503  | 3800  | 3 | 1414.25 | -1.27  |
| P26982 DEGP_SALTY Protease do                                         | 8  |                                                      | GYVVTTNNHVVDNASVIK                          | 124 | 17 | 3  | 13.09 | b3y10y14                            | 1828.92 | 50.754  | 57452 | 3 | 610.31  | -16.62 |

|                                   |    |                       |                                   |     |    |    |       |                                   |         |         |        |   |         |        |
|-----------------------------------|----|-----------------------|-----------------------------------|-----|----|----|-------|-----------------------------------|---------|---------|--------|---|---------|--------|
| P26982 DEGP_SALTY Protease do     | 9  |                       | NLTSQMVEYGVQVK                    | 275 | 13 | 4  | 27.99 | b12y5y8y11                        | 1496.75 | 58.448  | 51993  | 2 | 748.88  | 5.71   |
| P26982 DEGP_SALTY Protease do     | 10 |                       | LADSDALR                          | 178 | 8  | 6  | 42.12 | b6y3y6°y6y7°y7                    | 860.43  | 32.933  | 23054  | 2 | 430.72  | -17.10 |
| P26982 DEGP_SALTY Protease do     | 11 |                       | GELGIMGTELNSELAK                  | 289 | 16 | 12 | 44.17 | b3°b3b4b10b14°b14y6°y6y9°y9*y9y13 | 1661.86 | 59.726  | 17392  | 3 | 554.63  | 14.03  |
| P26982 DEGP_SALTY Protease do     | 12 |                       | ANSPPAQIGLK                       | 418 | 11 | 9  | 39.23 | b3*b3b4°b4b7°b7*b7y3y9            | 1069.59 | 46.046  | 5888   | 2 | 535.30  | -11.53 |
| P26982 DEGP_SALTY Protease do     | 13 |                       | GDSSIYLLMQ                        | 465 | 10 | 4  | 22.12 | b7y3*y3y7                         | 1126.54 | 46.738  | 4381   | 2 | 563.77  | -4.33  |
| P26982 DEGP_SALTY Protease do     | 14 |                       | NIAELR                            | 443 | 6  | 1  | 11.88 | y4                                | 715.41  | 32.023  | 2643   | 2 | 358.21  | 4.44   |
| P26982 DEGP_SALTY Protease do     | 15 |                       | VQLSDGR                           | 141 | 7  | 6  | 52.28 | b4*b4b6°b6y3y5                    | 774.41  | 37.150  | 2404   | 1 | 774.41  | 3.55   |
| P26982 DEGP_SALTY Protease do     | 16 |                       | SGLNVENYENFIQTDAAINR              | 214 | 20 | 5  | 20.73 | b6y7y8y12°y12                     | 2268.11 | 136.390 | 1569   | 2 | 1134.56 | 7.75   |
| P26982 DEGP_SALTY Protease do     | 17 |                       | GELGIMGTELNSELAKAMK               | 289 | 19 | 3  | 19.12 | b3b6b14                           | 1991.99 | 63.970  | 21507  | 3 | 664.67  | -13.24 |
| P26982 DEGP_SALTY Protease do     | 18 |                       | VDAQRGAFVSQVMPNSSAAK              | 308 | 20 | 4  | 31.5  | b3b4y9y10                         | 2063.01 | 66.176  | 13268  | 3 | 688.34  | -12.19 |
| P26982 DEGP_SALTY Protease do     | 19 |                       | GAFVSQVMPNSSAAKAGIK               | 313 | 19 | 6  | 26.64 | b8b9b11*b11b13y12                 | 1863.00 | 54.902  | 11208  | 3 | 621.67  | 8.52   |
| P26982 DEGP_SALTY Protease do     | 20 |                       | GYVVTNNHVVDNASVIKVLSDGR           | 124 | 24 | 3  | 11.05 | b4b10y4                           | 2584.37 | 89.711  | 3845   | 4 | 646.85  | 8.50   |
| P26982 DEGP_SALTY Protease do     | 21 | Phosphoryl STY(7)     | AGDVITSLNGKPISSFALR               | 332 | 20 | 4  | 11.82 | b6°b6b12y14                       | 2097.06 | 72.734  | 11129  | 3 | 699.69  | -3.96  |
| P26982 DEGP_SALTY Protease do     | 22 | Phosphoryl STY(6)     | GVVVSSVK                          | 410 | 8  | 4  | 49.9  | b3b5b7y7                          | 854.42  | 39.045  | 9752   | 2 | 427.71  | -11.93 |
| P26982 DEGP_SALTY Protease do     | 23 | Oxidation+M(30)       | AITVNLELQQSSQSQVDSSTIFSGIEGAEMSNK | 373 | 33 | 3  | 11.41 | b14b17y14                         | 3514.64 | 73.255  | 9977   | 3 | 1172.22 | -12.02 |
| P26982 DEGP_SALTY Protease do     | 24 | Oxidation+M(6)        | AQVGTMPVGSK                       | 352 | 11 | 8  | 28.77 | b3b8°b8y6°y6y10°y10*y10           | 1090.57 | 45.986  | 6212   | 2 | 545.79  | 13.32  |
| P26982 DEGP_SALTY Protease do     | 25 | Oxidation+M(2)        | FMALGSGVVIDAAK                    | 110 | 14 | 7  | 46.93 | b3b5b7b9y3y5°y5                   | 1408.74 | 68.949  | 4371   | 2 | 704.88  | -4.33  |
| P66955 TALB_SALTY Transaldolase B | 1  |                       | LIDDAVAWAK                        | 50  | 10 | 7  | 34.34 | b2b4°b4b5y2y6y8                   | 1101.60 | 45.945  | 10979  | 2 | 551.30  | 3.88   |
| P66955 TALB_SALTY Transaldolase B | 2  |                       | LYQPQDATTNPSLILNAAQIPEYR          | 25  | 24 | 8  | 27.31 | b7b8y2y4°y4y7y9y24                | 2716.39 | 82.184  | 10797  | 3 | 906.14  | -0.09  |
| P66955 TALB_SALTY Transaldolase B | 3  |                       | LYQPQDATTNPSLILNAAQIPEYRK         | 25  | 25 | 4  | 10.97 | b3y5y22y25                        | 2844.46 | 76.237  | 10120  | 3 | 948.83  | -8.58  |
| P66955 TALB_SALTY Transaldolase B | 4  |                       | ISTEVDAR                          | 92  | 8  | 6  | 42.12 | b7y2y5y6°y6y7                     | 890.45  | 28.356  | 10046  | 2 | 445.73  | -11.10 |
| P66955 TALB_SALTY Transaldolase B | 5  | Carbamidomethyl+C(11) | NVGEILELAGCDR                     | 228 | 13 | 7  | 26.23 | b1b2b7°b7y8y9y11                  | 1445.71 | 74.939  | 9603   | 2 | 723.36  | 4.73   |
| P66955 TALB_SALTY Transaldolase B | 6  | Carbamidomethyl+C(5)  | EGINCNLTLIFSFAQAR                 | 148 | 17 | 5  | 13.09 | b2°b2b12y3y14                     | 1953.96 | 108.135 | 8002   | 2 | 977.48  | -13.18 |
| P66955 TALB_SALTY Transaldolase B | 7  |                       | ELAESEGAIER                       | 250 | 11 | 6  | 59.51 | b6b7y6y7y9y10                     | 1203.59 | 129.426 | 2262   | 2 | 602.30  | 6.39   |
| P66955 TALB_SALTY Transaldolase B | 8  |                       | ILDWYK                            | 181 | 6  | 1  | 11.88 | b5                                | 837.46  | 30.263  | 10135  | 2 | 419.23  | 11.01  |
| P66955 TALB_SALTY Transaldolase B | 9  |                       | LSFSGEVK                          | 262 | 8  | 6  | 42.12 | b7y5y6°y6y7°y7                    | 866.47  | 42.497  | 9781   | 2 | 433.74  | 10.99  |
| P66955 TALB_SALTY Transaldolase B | 10 |                       | QHGYETVVMGASFR                    | 214 | 14 | 3  | 15.39 | b3b12y5                           | 1581.72 | 45.493  | 9727   | 3 | 527.91  | -15.74 |
| P66955 TALB_SALTY Transaldolase B | 11 |                       | DYAPAEDPGVVSVTEIYEYYK             | 193 | 21 | 4  | 14.63 | b5b13y3y5                         | 2408.12 | 93.355  | 8104   | 3 | 803.38  | 2.13   |
| P66955 TALB_SALTY Transaldolase B | 12 |                       | LYNDAGISNDR                       | 117 | 11 | 11 | 56.5  | b3°b3b4b7°b7°b7b10°b10y4y8°y8     | 1237.60 | 46.794  | 5406   | 2 | 619.30  | 11.84  |
| P66955 TALB_SALTY Transaldolase B | 13 |                       | AQQVVDATDK                        | 66  | 10 | 3  | 22.12 | b3b7y7                            | 1074.55 | 42.390  | 4702   | 2 | 537.78  | 7.95   |
| P66955 TALB_SALTY Transaldolase B | 14 |                       | LSYDTEASIAK                       | 100 | 11 | 5  | 22.75 | b9b10°b10y10°y10                  | 1197.59 | 60.597  | 1698   | 2 | 599.30  | -11.82 |
| P66955 TALB_SALTY Transaldolase B | 15 |                       | MIGDLL                            | 311 | 6  | 1  | 11.88 | y4                                | 661.37  | 30.762  | 1598   | 1 | 661.37  | 9.78   |
| P66955 TALB_SALTY Transaldolase B | 16 |                       | AQQVVDATDKLAVNIGLEILK             | 66  | 21 | 4  | 18.19 | b6b10°b10b14                      | 2238.25 | 78.088  | 256230 | 3 | 746.75  | -9.93  |
| P66955 TALB_SALTY Transaldolase B | 17 |                       | ISTEVDARLSYDTEASIAK               | 92  | 19 | 5  | 32.7  | b7b8y8y9y11                       | 2069.04 | 69.005  | 11886  | 3 | 690.35  | -1.30  |
| P66955 TALB_SALTY Transaldolase B | 18 |                       | ELAESEGAIERK                      | 250 | 12 | 5  | 25.88 | b4b9y4y9°y9                       | 1331.69 | 49.594  | 4078   | 2 | 666.35  | 6.97   |

|                                         |    |                                                                               |                                  |     |    |    |       |                                        |         |         |       |   |         |        |
|-----------------------------------------|----|-------------------------------------------------------------------------------|----------------------------------|-----|----|----|-------|----------------------------------------|---------|---------|-------|---|---------|--------|
| P66955 TALB_SALTY Transaldolase B       | 19 |                                                                               | LYQPQDATTNPSSLILNAAQIPEYR<br>K   | 25  | 25 | 3  | 17.2  | b5b11b13                               | 2844.45 | 115.015 | 2350  | 3 | 948.82  | -13.05 |
| P66955 TALB_SALTY Transaldolase B       | 20 | Phosphoryl STY(9)                                                             | QFTTVVADTGDIAMK                  | 9   | 16 | 6  | 34.59 | b4b5b13y6°y6y7                         | 1747.80 | 45.997  | 10552 | 3 | 583.27  | 5.66   |
| P66955 TALB_SALTY Transaldolase B       | 21 |                                                                               | QPQDATTNPSSLILNAAQIPEYR          | 27  | 22 | 4  | 12.59 | b12b14°b14*b14                         | 2440.21 | 82.186  | 2092  | 3 | 814.07  | -15.11 |
| Q8ZLR8 YHBJ_SALTY UPF0042 protein yhbJ  | 1  |                                                                               | FLPNPHWDPK                       | 184 | 10 | 7  | 49.4  | b3b7b8b9*b9y6y10                       | 1250.63 | 44.076  | 83144 | 2 | 625.82  | -4.39  |
| Q8ZLR8 YHBJ_SALTY UPF0042 protein yhbJ  | 2  |                                                                               | ERELTMVFESFGFK                   | 156 | 14 | 9  | 40.91 | b4b12°b12y3y6°y6y7°y7y9                | 1719.83 | 94.449  | 14734 | 2 | 860.42  | -3.90  |
| Q8ZLR8 YHBJ_SALTY UPF0042 protein yhbJ  | 3  |                                                                               | ELTMVFESFGFK                     | 158 | 12 | 4  | 21.92 | b2b10b11y11                            | 1434.71 | 75.484  | 2065  | 3 | 478.91  | 10.98  |
| Q8ZLR8 YHBJ_SALTY UPF0042 protein yhbJ  | 4  |                                                                               | ADLIVDTSEMSVHELAEMLR             | 129 | 20 | 7  | 24.15 | b9°b9b10b13y5°y5y10                    | 2259.11 | 107.618 | 90179 | 2 | 1130.06 | 6.27   |
| Q8ZLR8 YHBJ_SALTY UPF0042 protein yhbJ  | 5  |                                                                               | TLEK                             | 277 | 4  | 2  | 10.62 | b3°b3                                  | 490.28  | 33.850  | 26625 | 1 | 490.28  | -10.71 |
| Q8ZLR8 YHBJ_SALTY UPF0042 protein yhbJ  | 6  | Carbamidomethyl+C(9)                                                          | SYLTVAGCTGGK                     | 238 | 13 | 5  | 16.52 | b4°b4b8°b8y8                           | 1326.67 | 22.306  | 8031  | 3 | 442.90  | 1.29   |
| Q8ZLR8 YHBJ_SALTY UPF0042 protein yhbJ  | 7  |                                                                               | HTEVHNFIYQTR                     | 211 | 12 | 3  | 17.94 | b5y3y6                                 | 1544.76 | 35.675  | 6420  | 3 | 515.59  | 0.95   |
| Q8ZLR8 YHBJ_SALTY UPF0042 protein yhbJ  | 8  |                                                                               | NLSLESAIDK                       | 108 | 10 | 4  | 22.12 | b7°b7y3y6                              | 1089.58 | 61.954  | 4221  | 2 | 545.30  | 4.59   |
| Q8ZLR8 YHBJ_SALTY UPF0042 protein yhbJ  | 9  |                                                                               | HGIPIDADYVFDVR                   | 170 | 14 | 4  | 23.96 | b7°b7b10b13                            | 1616.82 | 59.783  | 3054  | 3 | 539.61  | 8.53   |
| Q8ZLR8 YHBJ_SALTY UPF0042 protein yhbJ  | 10 |                                                                               | SYLELWLPLETNNR                   | 223 | 15 | 4  | 20.16 | b9b11y3y11                             | 1878.90 | 113.840 | 2073  | 2 | 939.95  | -21.89 |
| Q8ZLR8 YHBJ_SALTY UPF0042 protein yhbJ  | 11 | Carbamidomethyl+C(9)                                                          | SYLTVAGCTGGKHR                   | 238 | 15 | 3  | 14.47 | b11b13y6                               | 1619.83 | 85.515  | 8831  | 3 | 540.62  | 0.60   |
| Q8ZLR8 YHBJ_SALTY UPF0042 protein yhbJ  | 12 |                                                                               | ELTMVFESFGFKHGIPIDADYVFD<br>VR   | 158 | 26 | 3  | 10.93 | b10y6y12                               | 3032.46 | 101.253 | 6218  | 3 | 1011.49 | -7.41  |
| Q8ZLR8 YHBJ_SALTY UPF0042 protein yhbJ  | 13 |                                                                               | SVYIAEQLADYFRSR                  | 253 | 15 | 7  | 23.8  | b6°b6b8*b8b14y11°y11                   | 1817.94 | 70.038  | 2489  | 3 | 606.65  | 10.88  |
| Q8ZLR8 YHBJ_SALTY UPF0042 protein yhbJ  | 14 |                                                                               | ERELTMVFESFGFK                   | 156 | 14 | 6  | 34.58 | b4b6b10b11y11°y11                      | 1719.82 | 67.861  | 2030  | 2 | 860.42  | -10.01 |
| Q8ZLR8 YHBJ_SALTY UPF0042 protein yhbJ  | 15 |                                                                               | NLSLESAIDKESDLLEPLR              | 108 | 19 | 4  | 31.54 | b9b10b11y9                             | 2142.13 | 88.279  | 1570  | 3 | 714.71  | -0.34  |
| Q8ZLR8 YHBJ_SALTY UPF0042 protein yhbJ  | 16 | Oxidation+M(4)                                                                | ELTMVFESFGFK                     | 158 | 12 | 7  | 41.9  | b6°b6b9y6y7°y7y8                       | 1450.70 | 54.397  | 7186  | 3 | 484.24  | 4.21   |
| Q8ZLR8 YHBJ_SALTY UPF0042 protein yhbJ  | 17 | Oxidation+M(9)                                                                | SYLELWLPLETNNR                   | 223 | 15 | 4  | 20.16 | b4b6y4y6                               | 1894.92 | 90.444  | 1890  | 3 | 632.31  | -8.18  |
| Q8ZQZ6 SYL_SALTY Leucyl-tRNA synthetase | 1  |                                                                               | QTFNTAIAAIMELMNK                 | 719 | 16 | 14 | 44.84 | b2°b2*b2b6b7b9y1y5°y5y6<br>y8*y8y10y16 | 1795.92 | 90.583  | 79906 | 3 | 599.31  | 8.70   |
| Q8ZQZ6 SYL_SALTY Leucyl-tRNA synthetase | 2  | Carbamidomethyl+C(7);<br>Carbamidomethyl+C(23)<br>;Carbamidomethyl+C(24)<br>) | TSAVNWC PN DQTVLANEQVIDGC<br>CWR | 152 | 26 | 5  | 12.62 | b5b9y9°y9y12                           | 3093.38 | 67.388  | 17730 | 3 | 1031.80 | 7.34   |
| Q8ZQZ6 SYL_SALTY Leucyl-tRNA synthetase | 3  |                                                                               | GVLFNSGEFDGLAFEAAFNAIADK         | 378 | 24 | 4  | 11.05 | b3b9y7°y7                              | 2503.21 | 69.820  | 17497 | 4 | 626.56  | -1.07  |
| Q8ZQZ6 SYL_SALTY Leucyl-tRNA synthetase | 4  | Carbamidomethyl+C(15)                                                         | TLGFGYDWSREIATCTPEYYR            | 113 | 21 | 8  | 11.55 | b1°b1b8b11°b11y1y8°y8                  | 2585.21 | 125.550 | 15901 | 4 | 647.06  | 11.80  |
| Q8ZQZ6 SYL_SALTY Leucyl-tRNA synthetase | 5  | Carbamidomethyl+C(4)                                                          | QLLCQGMVLADAFYVVGENDER           | 561 | 22 | 6  | 22.92 | b4b7y6°y6y7y12                         | 2533.22 | 77.309  | 15805 | 3 | 845.08  | 14.26  |
| Q8ZQZ6 SYL_SALTY Leucyl-tRNA synthetase | 6  |                                                                               | QEQRPEEIESK                      | 1   | 12 | 4  | 17.94 | b5b8y8°y8                              | 1535.74 | 38.204  | 14999 | 3 | 512.59  | 6.04   |
| Q8ZQZ6 SYL_SALTY Leucyl-tRNA synthetase | 7  |                                                                               | TFEVTEDESKEK                     | 22  | 12 | 11 | 41.41 | b1b4y2°y2y5°y5y6°y6y8y1<br>0y12        | 1441.67 | 45.933  | 14354 | 3 | 481.23  | 1.95   |
| Q8ZQZ6 SYL_SALTY Leucyl-tRNA synthetase | 8  |                                                                               | ITVPVDATEEQVRER                  | 813 | 15 | 5  | 26.18 | b10b11y6y12y15                         | 1741.91 | 54.261  | 12266 | 2 | 871.46  | 0.21   |



|                                         |    |                      |                                   |     |    |    |       |                        |         |         |       |   |         |        |
|-----------------------------------------|----|----------------------|-----------------------------------|-----|----|----|-------|------------------------|---------|---------|-------|---|---------|--------|
| Q8ZQZ6 SYL_SALTY Leucyl-tRNA synthetase | 9  |                      | AGQEHLVAK                         | 828 | 9  | 7  | 50.99 | b1b6b7b8y4y7y9         | 952.51  | 30.106  | 12173 | 2 | 476.76  | -7.50  |
| Q8ZQZ6 SYL_SALTY Leucyl-tRNA synthetase | 10 |                      | NNTAPAPWTYDNIAYMK                 | 92  | 17 | 10 | 33.62 | b1b2b3b4°b4b7b9°b9y4y9 | 1969.94 | 38.064  | 7448  | 3 | 657.32  | 12.39  |
| Q8ZQZ6 SYL_SALTY Leucyl-tRNA synthetase | 11 |                      | NWVSPVDAIVERDEK                   | 583 | 15 | 4  | 20.49 | b6y8°y8y9              | 1756.91 | 96.643  | 6168  | 2 | 878.96  | 12.51  |
| Q8ZQZ6 SYL_SALTY Leucyl-tRNA synthetase | 12 |                      | ITVPVDATEEQVR                     | 813 | 13 | 6  | 27.99 | b2b10y6°y6y8y12        | 1456.77 | 95.441  | 5385  | 2 | 728.89  | 5.11   |
| Q8ZQZ6 SYL_SALTY Leucyl-tRNA synthetase | 13 |                      | NYTIGDVVAR                        | 54  | 10 | 5  | 19.62 | b1b8b9°b9y10           | 1107.59 | 42.442  | 4532  | 2 | 554.30  | 8.05   |
| Q8ZQZ6 SYL_SALTY Leucyl-tRNA synthetase | 14 |                      | LMRDAGMVTSDPEAK                   | 546 | 15 | 3  | 14.47 | b9b12y12               | 1620.78 | 50.211  | 4513  | 2 | 810.89  | 3.62   |
| Q8ZQZ6 SYL_SALTY Leucyl-tRNA synthetase | 15 |                      | NWVSPVDAIVER                      | 583 | 12 | 9  | 28.15 | b1b2b5°b5b7°b7b9y2°y2  | 1384.74 | 37.158  | 3928  | 3 | 462.25  | 12.52  |
| Q8ZQZ6 SYL_SALTY Leucyl-tRNA synthetase | 16 |                      | AKDAAGHELVYTGMASK                 | 603 | 16 | 3  | 13.71 | b7y5y14                | 1677.83 | 87.508  | 2986  | 3 | 559.95  | 2.47   |
| Q8ZQZ6 SYL_SALTY Leucyl-tRNA synthetase | 17 |                      | EIPQWFIK                          | 186 | 8  | 6  | 42.12 | b4°b4b6b7y6°y6         | 1060.57 | 32.019  | 35212 | 2 | 530.79  | -12.55 |
| Q8ZQZ6 SYL_SALTY Leucyl-tRNA synthetase | 18 |                      | AANYWLPVDIYIGGIEHAIMHLLYFR        | 516 | 26 | 6  | 19.63 | b7b8°b8b10y11°y11      | 3075.54 | 133.438 | 9584  | 3 | 1025.85 | -17.23 |
| Q8ZQZ6 SYL_SALTY Leucyl-tRNA synthetase | 19 |                      | NNGIDPQVMVER                      | 624 | 12 | 3  | 25.14 | y4y5y7                 | 1371.69 | 26.689  | 7355  | 3 | 457.90  | 16.82  |
| Q8ZQZ6 SYL_SALTY Leucyl-tRNA synthetase | 20 |                      | MQEQRPEEIESK                      | 0   | 13 | 4  | 16.52 | b8°b8y3y5              | 1666.80 | 76.689  | 5748  | 3 | 556.27  | 15.16  |
| Q8ZQZ6 SYL_SALTY Leucyl-tRNA synthetase | 21 |                      | LVYEHTAK                          | 675 | 8  | 5  | 30.87 | b5b7°b7y6°y6           | 960.50  | 37.185  | 4723  | 2 | 480.75  | -13.53 |
| Q8ZQZ6 SYL_SALTY Leucyl-tRNA synthetase | 22 |                      | TTVNGMPALR                        | 475 | 10 | 7  | 49.4  | b7y6y7y8°y8y9°y9       | 1059.54 | 42.448  | 4576  | 2 | 530.27  | -21.43 |
| Q8ZQZ6 SYL_SALTY Leucyl-tRNA synthetase | 23 |                      | GVDGTGYK                          | 301 | 7  | 3  | 35.01 | b3y3y5                 | 739.36  | 31.437  | 2958  | 2 | 370.19  | 0.74   |
| Q8ZQZ6 SYL_SALTY Leucyl-tRNA synthetase | 24 |                      | TLGFGYDWSR                        | 113 | 10 | 7  | 43.83 | b7b9°b9y4y8°y8y9       | 1201.54 | 37.141  | 1840  | 2 | 601.27  | -18.19 |
| Q8ZQZ6 SYL_SALTY Leucyl-tRNA synthetase | 25 |                      | VTDDIGR                           | 711 | 7  | 3  | 32    | b3b4y6                 | 775.40  | 38.033  | 1631  | 1 | 775.40  | 8.82   |
| Q8ZQZ6 SYL_SALTY Leucyl-tRNA synthetase | 26 |                      | NNGIDPQVMVERYGADTVR               | 624 | 19 | 3  | 12.16 | b6y7y10                | 2134.01 | 84.115  | 63289 | 3 | 712.01  | -12.58 |
| Q8ZQZ6 SYL_SALTY Leucyl-tRNA synthetase | 27 |                      | YGADTVRLFMFMFASPADMTLEWQESGVEGANR | 636 | 32 | 3  | 11.27 | b8y7y12                | 3579.65 | 117.850 | 18423 | 3 | 1193.89 | 4.16   |
| Q8ZQZ6 SYL_SALTY Leucyl-tRNA synthetase | 28 |                      | LAEKGVGER                         | 402 | 9  | 7  | 52.75 | b8y3y4°y4y5°y5y7       | 958.54  | 62.614  | 17879 | 2 | 479.77  | 8.21   |
| Q8ZQZ6 SYL_SALTY Leucyl-tRNA synthetase | 29 |                      | LAKAPQEGEQDR                      | 735 | 12 | 6  | 30.95 | b11y3°y3y5y11°y11      | 1341.68 | 59.731  | 10757 | 3 | 447.90  | 3.09   |
| Q8ZQZ6 SYL_SALTY Leucyl-tRNA synthetase | 30 |                      | NTKVAEAEEMATMEK                   | 286 | 14 | 3  | 15.39 | b9y3y5                 | 1552.73 | 71.436  | 5850  | 2 | 776.87  | -4.01  |
| Q8ZQZ6 SYL_SALTY Leucyl-tRNA synthetase | 31 | Carbamidomethyl+C(5) | EKYYCLSMPLPYPSGR                  | 32  | 15 | 5  | 26.18 | b11°b11b13y12y13       | 1863.88 | 74.139  | 5453  | 2 | 932.45  | 3.60   |
| Q8ZQZ6 SYL_SALTY Leucyl-tRNA synthetase | 32 |                      | NQLKTLGFGYDWSR                    | 109 | 14 | 3  | 15.39 | b3y5y11                | 1684.84 | 60.614  | 4846  | 3 | 562.29  | -0.72  |
| Q8ZQZ6 SYL_SALTY Leucyl-tRNA synthetase | 33 |                      | ADPEWAKTTVNGMPALR                 | 468 | 17 | 8  | 62.28 | b7°b7b8b9b11b12b13y8   | 1856.95 | 59.784  | 3459  | 2 | 928.98  | 9.99   |
| Q8ZQZ6 SYL_SALTY Leucyl-tRNA synthetase | 34 |                      | WEQKFFTELYK                       | 134 | 11 | 5  | 34.97 | b6b7°b7b8y10           | 1518.75 | 70.016  | 2297  | 2 | 759.88  | -6.19  |
| Q8ZQZ6 SYL_SALTY Leucyl-tRNA synthetase | 35 |                      | AKDAAGHELVYTGMASK                 | 603 | 16 | 3  | 20.25 | b12y7y8                | 1677.83 | 92.208  | 1822  | 2 | 839.42  | 4.95   |
| Q8ZQZ6 SYL_SALTY Leucyl-tRNA synthetase | 36 |                      | KGVDGTGYK                         | 300 | 8  | 5  | 35.64 | b4°b4b5°b5b7           | 867.45  | 22.294  | 1670  | 2 | 434.23  | -10.98 |
| Q8ZQZ6 SYL_SALTY Leucyl-tRNA synthetase | 37 |                      | NWVSPVDAIVERDEK                   | 583 | 15 | 7  | 31.07 | b3b5°b5b6°b6b13°b13    | 1756.90 | 90.603  | 1586  | 3 | 586.30  | 6.25   |

|                                         |    |                                         |                                           |     |    |   |       |                   |         |         |       |   |         |        |
|-----------------------------------------|----|-----------------------------------------|-------------------------------------------|-----|----|---|-------|-------------------|---------|---------|-------|---|---------|--------|
| Q8ZQZ6 SYL_SALTY Leucyl-tRNA synthetase | 38 |                                         | ITVPVDATEEQVRER                           | 813 | 15 | 4 | 22.55 | b6b9b11°b11       | 1741.89 | 82.255  | 1555  | 2 | 871.45  | -10.23 |
| Q8ZQZ6 SYL_SALTY Leucyl-tRNA synthetase | 39 | Oxidation+M()                           | VAEAEMATMEKK                              | 289 | 12 | 6 | 25.88 | b4°b4b11°b11y4y10 | 1353.64 | 50.237  | 26702 | 2 | 677.32  | 0.63   |
| Q8ZQZ6 SYL_SALTY Leucyl-tRNA synthetase | 40 | Oxidation+M(2)                          | LMRDAGMVTSDPEAK                           | 546 | 15 | 6 | 23.8  | b5°b5b6°b6b11y6   | 1636.79 | 72.567  | 19810 | 2 | 818.90  | 15.07  |
| Q8ZQZ6 SYL_SALTY Leucyl-tRNA synthetase | 41 | Oxidation+M(28)                         | AIHPLTGEEIPVWAANFVLMHEYGT<br>GAVMAVPGHDQR | 308 | 36 | 4 | 11.92 | b13y8y11*y11      | 3892.86 | 121.918 | 9107  | 4 | 973.97  | -14.74 |
| Q8ZQZ6 SYL_SALTY Leucyl-tRNA synthetase | 42 | Carbamidomethyl+C(4);<br>Oxidation+M(7) | QLLCQGMVLADAFYYVGENDER                    | 561 | 22 | 3 | 20.08 | b13y4y5           | 2549.20 | 69.072  | 7524  | 2 | 1275.10 | 6.42   |
| Q8ZQZ6 SYL_SALTY Leucyl-tRNA synthetase | 43 | Oxidation+M(14)                         | AKDAAGHELVYTGMSK                          | 603 | 16 | 3 | 13.71 | b4b9y3            | 1693.83 | 75.457  | 4361  | 2 | 847.42  | 2.38   |
| Q8ZQZ6 SYL_SALTY Leucyl-tRNA synthetase | 44 | Oxidation+M(6)                          | VAEAEMATMEK                               | 289 | 11 | 5 | 30.2  | b5y4°y4y5y7       | 1225.54 | 41.621  | 3899  | 2 | 613.27  | -6.28  |
| Q8ZQZ6 SYL_SALTY Leucyl-tRNA synthetase | 45 | Oxidation+M(19)                         | TTVNGMPALRETDTFDTFMESW<br>YYAR            | 475 | 27 | 3 | 20.92 | b9b10y5           | 3205.41 | 81.305  | 3753  | 3 | 1069.14 | -3.88  |
| Q8ZQZ6 SYL_SALTY Leucyl-tRNA synthetase | 46 |                                         | VDATEEQVRER                               | 817 | 11 | 2 | 7.53  | b10°b10           | 1331.66 | 54.255  | 3705  | 2 | 666.33  | 3.85   |
| Q8ZQZ6 SYL_SALTY Leucyl-tRNA synthetase | 47 |                                         | ATEEQVRER                                 | 819 | 9  | 0 | 6.28  |                   | 1117.55 | 54.273  | 3351  | 2 | 559.28  | -9.18  |
