# Supplementary material for: Phenotypic profile linked to inhibition of the major Zn influx system in Salmonella enterica : proteomics and ionomics investigations
Source: Royal Society of Chemistry journal article supplement (doi:10.1039/c0mb00140f), 2010-10-20
Supplement: c0mb00140f.zip [file c0mb00140f.zip]

MA6926 + Zn(II) LC-MS run 1: 6926\_Zn\_220709\_1a2\_01

| Protein name                                               | Peptide Rank | Peptide Modification | Peptide Sequence              | Peptide sequence start | Peptide sequence Length | Peptide Matched Products | Peptide Score | By Matches                                                                                                                          | Precursor MH+ (Da) | Retention time (min) | Intensity | z | Precursor m/z | MH+ Error (ppm) |
|------------------------------------------------------------|--------------|----------------------|-------------------------------|------------------------|-------------------------|--------------------------|---------------|-------------------------------------------------------------------------------------------------------------------------------------|--------------------|----------------------|-----------|---|---------------|-----------------|
| P0A1R6 DBHA_SALTY DNA-binding protein HU-alpha             | 1            |                      | IAAANVPAFVSGK                 | 70                     | 13                      | 24                       | 195.23        | b2b3b4b5*b5b6*b6b10y2y3y4y5y6y7°y7y8y9*y9y10*y10y11*y11y12y13                                                                       | 1244.69            | 60.221               | 648149    | 2 | 622.85        | -4.32           |
| P0A1R6 DBHA_SALTY DNA-binding protein HU-alpha             | 2            |                      | AALESTLAAITESLKEGDAVQLVGFGTFK | 22                     | 29                      | 48                       | 402.63        | b2b3b4b5°b5b6°b6b7°b7b8°b8b9°b9b16b18b19b20b23b25b26b28b29y1y2y3y4°y4y6°y6y7y8y10y11y13*y13y14*y14y15y17y19y20y21y22y23y24y25y26y29 | 2966.57            | 114.932              | 449179    | 3 | 989.53        | 0.58            |
| P0A1R6 DBHA_SALTY DNA-binding protein HU-alpha             | 3            |                      | EGDAVQLVGFGTFK                | 37                     | 14                      | 6                        | 32.54         | b5b8*b8b12y6y14                                                                                                                     | 1467.75            | 78.860               | 7111      | 2 | 734.38        | 0.00            |
| P0A2H9 DSBA_SALTY Thiol:disulfide interchange protein dsbA | 1            |                      | AAADLQLQGV PAMFVNGK           | 158                    | 18                      | 32                       | 267.52        | b1b2b3b4b5°b5b6°b6b7b8b9b10b13b14b15y2y3*y3y4*y4y5*y5y7y8y10y11*y11y12y13*y13y14y18                                                 | 1829.97            | 81.474               | 224431    | 2 | 915.49        | 4.00            |
| P0A2H9 DSBA_SALTY Thiol:disulfide interchange protein dsbA | 2            |                      | YQINPQGMdTSSMDVFVQYYADTVK     | 176                    | 25                      | 16                       | 92.93         | b1b2*b2b3b4b11b14y3y4y5y6y7°y7*y7y12y20                                                                                             | 2865.32            | 87.112               | 108176    | 3 | 955.78        | 3.66            |
| P0A2H9 DSBA_SALTY Thiol:disulfide interchange protein dsbA | 3            |                      | YHVEFLGPLGK                   | 77                     | 11                      | 15                       | 118.04        | b2b3b4b5°b5b6°b6b7b8°b8y2y3y5y9y11                                                                                                  | 1259.68            | 69.795               | 87852     | 2 | 630.34        | 0.68            |
| P0A2H9 DSBA_SALTY Thiol:disulfide interchange protein dsbA | 4            |                      | TQTVQSAADIR                   | 116                    | 11                      | 20                       | 132.83        | b2°b2b3°b3b4b8°b8*b8b9b11y2y3y5y6y7°y7*y7y8y9y11                                                                                    | 1189.61            | 35.850               | 80603     | 2 | 595.31        | -4.82           |
| P0A2H9 DSBA_SALTY Thiol:disulfide interchange protein dsbA | 5            |                      | ELTQAWAVAMALGVEDK             | 88                     | 17                      | 5                        | 16.93         | b4°b4*b4b8y9                                                                                                                        | 1831.95            | 102.267              | 1559      | 3 | 611.32        | 15.06           |
| P0A2H9 DSBA_SALTY Thiol:disulfide interchange protein dsbA | 6            | Oxidation+M(10)      | ELTQAWAVAMALGVEDK             | 88                     | 17                      | 4                        | 23.85         | b6b8y7y12                                                                                                                           | 1847.91            | 107.864              | 2955      | 2 | 924.46        | -8.46           |
| P0A2H9 DSBA_SALTY Thiol:disulfide interchange protein dsbA | 7            | Oxidation+M(21)      | YHVEFLGPLGKELTQAWAVAMALGVEDK  | 77                     | 28                      | 3                        | 12.01         | b5y5y12                                                                                                                             | 3088.57            | 53.073               | 2362      | 4 | 772.90        | -2.29           |
| P0A2H9 DSBA_SALTY Thiol:disulfide interchange protein dsbA | 8            | Oxidation+M(13)      | AAADLQLQGV PAMFVNGK           | 158                    | 18                      | 7                        | 44.89         | b5b6°b6b8b9°b9y7                                                                                                                    | 1845.97            | 105.092              | 2112      | 2 | 923.49        | 10.45           |
| P0A2H9 DSBA_SALTY Thiol:disulfide interchange protein dsbA | 9            |                      | HVEFLGPLGK                    | 78                     | 10                      | 1                        | 8.01          | b4                                                                                                                                  | 1096.61            | 69.772               | 9018      | 2 | 548.81        | -8.57           |
| P0A2H9 DSBA_SALTY Thiol:disulfide interchange protein dsbA | 10           |                      | PAMFVNGK                      | 168                    | 8                       | 3                        | 35.08         | b3b4b5                                                                                                                              | 863.44             | 81.452               | 3194      | 1 | 863.44        | -4.31           |
| P0A1H5 EFTU_SALTY Elongation factor Tu                     | 1            |                      | AIDKPFLLPIDVFSISGR            | 205                    | 19                      | 29                       | 231.41        | b2b3b4°b4b6°b6b7b8b9b12b13y1y2y3y4y5y6°y6y7y8°y8y9°y9y10y11°y11y12y15y19                                                            | 2117.15            | 104.648              | 377981    | 3 | 706.39        | -6.92           |
| P0A1H5 EFTU_SALTY Elongation factor Tu                     | 2            |                      | AGENVGVLLR                    | 270                    | 10                      | 12                       | 105.38        | b1b4b5°b5b6y2y3y4y5y6y7y10                                                                                                          | 1027.58            | 56.978               | 278257    | 2 | 514.30        | -6.65           |

|                                        |    |                       |                                       |     |    |    |        |                                                                                           |         |         |        |   |         |        |
|----------------------------------------|----|-----------------------|---------------------------------------|-----|----|----|--------|-------------------------------------------------------------------------------------------|---------|---------|--------|---|---------|--------|
| P0A1H5 EFTU_SALTY Elongation factor Tu | 3  |                       | ELLSQYDFPGDDTPIVR                     | 155 | 17 | 22 | 216.14 | b2b6b7°b7b12b13b15b16y1y2y3y4y5y6y8y9y10y11y12y13y14y17                                   | 1964.97 | 77.466  | 243406 | 2 | 982.99  | 6.09   |
| P0A1H5 EFTU_SALTY Elongation factor Tu | 4  |                       | GITINTSHVEYDTPTR                      | 59  | 16 | 25 | 184.9  | b2b3°b3b9b10b12b16y3°y3y4°y4y5°y5y6y7y8y9°y9y10y12*y12y13y14°y14y16                       | 1803.87 | 50.171  | 195031 | 3 | 601.96  | -12.32 |
| P0A1H5 EFTU_SALTY Elongation factor Tu | 5  |                       | TTLTAAITTVLAK                         | 25  | 13 | 20 | 150.65 | b2°b2b3°b3b4°b4b6°b6b13y2y3y4y5y6y7y8y9y10y11y13                                          | 1303.78 | 84.987  | 192919 | 2 | 652.40  | 0.00   |
| P0A1H5 EFTU_SALTY Elongation factor Tu | 6  |                       | TTDVTGTIELPEGVEMVMPGDNI K             | 334 | 24 | 33 | 210.06 | b2°b2b3°b3b4°b4b5°b5b8°b8b9b10°b10b13b17b18y2y3y5y6°y6*y6y7y8y9y10y12y14*y14y15°y15y16y24 | 2546.26 | 87.338  | 175572 | 2 | 1273.63 | 8.92   |
| P0A1H5 EFTU_SALTY Elongation factor Tu | 7  |                       | QVGVPYIIVFLNK                         | 124 | 13 | 11 | 85.72  | b3b4b7b13y1y4y5y6y9y11y13                                                                 | 1489.88 | 99.512  | 169347 | 2 | 745.44  | 0.25   |
| P0A1H5 EFTU_SALTY Elongation factor Tu | 8  |                       | IELAGFLDSYIPEPER                      | 188 | 17 | 22 | 204.26 | b2b3b4b5b7b11°b11b12b14y1y3y4y5y6y7y8y9y11°y11y12y13y17                                   | 1962.03 | 102.414 | 167915 | 2 | 981.52  | 3.98   |
| P0A1H5 EFTU_SALTY Elongation factor Tu | 9  |                       | ALEGDAEWEAK                           | 177 | 11 | 7  | 83.46  | y4y5y6y7y8y9y11                                                                           | 1218.56 | 46.757  | 85023  | 2 | 609.78  | -2.20  |
| P0A1H5 EFTU_SALTY Elongation factor Tu | 10 | Carbamidomethyl+C(3)  | STCTGVEMFR                            | 253 | 10 | 8  | 59.55  | b6y2y4y6y7°y7y8y10                                                                        | 1187.52 | 53.376  | 80215  | 2 | 594.26  | -2.26  |
| P0A1H5 EFTU_SALTY Elongation factor Tu | 11 |                       | VGEEVEIVGIK                           | 238 | 11 | 7  | 53.91  | b1b3b5y3y5y7y11                                                                           | 1171.65 | 60.822  | 49849  | 2 | 586.33  | -2.92  |
| P0A1H5 EFTU_SALTY Elongation factor Tu | 12 | Carbamidomethyl+C(1)  | CDMVDDEELLELVEMEVR                    | 137 | 18 | 17 | 117.79 | b2b3b11y1y2y3°y3y5y6°y6y7y8y9y11y13y14y18                                                 | 2224.01 | 106.536 | 37592  | 2 | 1112.51 | 12.62  |
| P0A1H5 EFTU_SALTY Elongation factor Tu | 13 |                       | NMITGAAQMDGAILVVAATDGP MPQTREHILLGR   | 90  | 34 | 6  | 18.16  | b3b9b29y1y4y13                                                                            | 3547.80 | 93.809  | 26017  | 3 | 1183.27 | -3.85  |
| P0A1H5 EFTU_SALTY Elongation factor Tu | 14 |                       | NMITGAAQMDGAILVVAATDGP MPQTR          | 90  | 27 | 8  | 26.94  | b8°b8b21y7*y7y10y11y27                                                                    | 2729.32 | 106.200 | 24523  | 3 | 910.44  | -8.14  |
| P0A1H5 EFTU_SALTY Elongation factor Tu | 15 |                       | FESEVYILSKDEGGR                       | 304 | 15 | 4  | 30.42  | b7b12b13y12                                                                               | 1728.82 | 86.541  | 9524   | 3 | 576.95  | -11.72 |
| P0A1H5 EFTU_SALTY Elongation factor Tu | 16 |                       | VGEEVEIVGIKETQK                       | 238 | 15 | 3  | 18.81  | b3b9y12                                                                                   | 1657.88 | 84.037  | 3146   | 2 | 829.45  | -10.82 |
| P0A1H5 EFTU_SALTY Elongation factor Tu | 17 |                       | MVVTLIHPIAMDDGLR                      | 358 | 16 | 21 | 203.2  | b3b4°b4b5°b5b7°b7y3y4y5y6y7y8y9°y9y10°y10y11y12y13y15                                     | 1780.92 | 79.350  | 515675 | 3 | 594.31  | -15.42 |
| P0A1H5 EFTU_SALTY Elongation factor Tu | 18 |                       | EHILLGR                               | 117 | 7  | 5  | 57.9   | b3°b3b4y3y5                                                                               | 837.48  | 40.208  | 135178 | 2 | 419.24  | -16.98 |
| P0A1H5 EFTU_SALTY Elongation factor Tu | 19 |                       | TVGAGVVAK                             | 382 | 9  | 9  | 76.69  | b3°b3b4°b4b7°b7y3y7y8                                                                     | 801.47  | 29.029  | 111413 | 2 | 401.24  | -19.50 |
| P0A1H5 EFTU_SALTY Elongation factor Tu | 20 |                       | GYRPQFYFR                             | 325 | 9  | 9  | 106.77 | b3b5b6y3y4y5*y5y6y7                                                                       | 1233.59 | 58.946  | 84139  | 3 | 411.87  | -17.91 |
| P0A1H5 EFTU_SALTY Elongation factor Tu | 21 |                       | TKPHVNVGTIGHVDHGK                     | 8   | 17 | 4  | 30.84  | b3b14y5y6                                                                                 | 1795.93 | 90.439  | 58060  | 3 | 599.31  | -17.33 |
| P0A1H5 EFTU_SALTY Elongation factor Tu | 22 | Carbamidomethyl+C(7)  | HYAHVDCPGHADYVK                       | 75  | 15 | 3  | 24.83  | b3b4y4                                                                                    | 1768.75 | 31.532  | 28141  | 4 | 442.94  | -17.81 |
| P0A1H5 EFTU_SALTY Elongation factor Tu | 23 |                       | EEIER                                 | 284 | 5  | 1  | 13.53  | y3                                                                                        | 675.33  | 65.003  | 2321   | 1 | 675.33  | -0.90  |
| P0A1H5 EFTU_SALTY Elongation factor Tu | 24 | Carbamidomethyl+C(23) | GITINTSHVEYDTPTRHYAHVDCP GHADYVK      | 59  | 31 | 3  | 22.98  | y7y8y10                                                                                   | 3553.61 | 49.379  | 53207  | 5 | 711.53  | -14.08 |
| P0A1H5 EFTU_SALTY Elongation factor Tu | 25 |                       | IIELAGFLDSYIPEPERAIDKPFLLP IEDVFSISGR | 188 | 36 | 9  | 54.25  | b3b4b6b7y5y6°y6y8y11                                                                      | 4060.16 | 123.362 | 53098  | 4 | 1015.80 | -0.84  |
| P0A1H5 EFTU_SALTY Elongation factor Tu | 26 |                       | GTVVTGRVER                            | 224 | 10 | 10 | 93.61  | b3°b3b6b9y3°y3y6y7°y7y8                                                                   | 1073.60 | 26.148  | 46487  | 2 | 537.30  | -8.53  |

|                                                            |    |                                      |                                             |     |    |    |        |                                                                                                              |         |         |        |   |         |        |
|------------------------------------------------------------|----|--------------------------------------|---------------------------------------------|-----|----|----|--------|--------------------------------------------------------------------------------------------------------------|---------|---------|--------|---|---------|--------|
| P0A1H5 EFTU_SALTY Elongation factor Tu                     | 27 |                                      | HTPFFKGYRPQFYFR                             | 319 | 15 | 4  | 32.8   | b10b11y3y8                                                                                                   | 1991.01 | 103.368 | 35264  | 2 | 996.01  | 0.18   |
| P0A1H5 EFTU_SALTY Elongation factor Tu                     | 28 | Carbamidomethyl+C(14)                | QVGVPYIIVFLNKCDMVDDEELLE LVEMEV             | 124 | 31 | 9  | 80.07  | b4*b4b7y3y4y5y6y7y8                                                                                          | 3694.85 | 128.084 | 18357  | 3 | 1232.29 | 3.30   |
| P0A1H5 EFTU_SALTY Elongation factor Tu                     | 29 | Carbamidomethyl+C(7)                 | HYAHVDCPGHADYVKNMITGAA QMDGAILVVAATDGPMPQTR | 75  | 42 | 6  | 38.17  | b3b4b5y6*y6y8                                                                                                | 4479.12 | 112.099 | 9098   | 5 | 896.63  | 3.05   |
| P0A1H5 EFTU_SALTY Elongation factor Tu                     | 30 |                                      | GYRPQFYFRTTDDVTGTIELPEGVE MVMPGDNIK         | 325 | 33 | 6  | 29.75  | b5b6*b6y4y7y10                                                                                               | 3760.79 | 97.931  | 9053   | 3 | 1254.27 | -12.33 |
| P0A1H5 EFTU_SALTY Elongation factor Tu                     | 31 |                                      | AFDQIDNAPEEKAR                              | 45  | 14 | 3  | 19.98  | b9b13y5                                                                                                      | 1603.79 | 84.239  | 5191   | 2 | 802.40  | 13.85  |
| P0A1H5 EFTU_SALTY Elongation factor Tu                     | 32 |                                      | TYGGAARAFDQIDNAPEEK                         | 38  | 19 | 12 | 81.86  | b4b7b8*b8b9b10b12*b12*b12y3y11y12                                                                            | 2052.98 | 92.166  | 3411   | 3 | 685.00  | 6.90   |
| P0A1H5 EFTU_SALTY Elongation factor Tu                     | 33 | Oxidation+M(1)                       | MVVTLIHPIAMDDGLR                            | 358 | 16 | 6  | 51.6   | y3y5y8y9y10*y10                                                                                              | 1796.92 | 74.182  | 30596  | 3 | 599.64  | -11.68 |
| P0A1H5 EFTU_SALTY Elongation factor Tu                     | 34 | Carbamidomethyl+C(3); Oxidation+M(8) | STCTGVEMFRK                                 | 253 | 11 | 4  | 25.08  | b5y3y7*y7                                                                                                    | 1331.61 | 43.832  | 3503   | 2 | 666.31  | 2.84   |
| P0A1H5 EFTU_SALTY Elongation factor Tu                     | 35 |                                      | NTSHVEYDTPTR                                | 63  | 12 | 7  | 40.8   | b4*b4*b4b6b7*b7b8                                                                                            | 1419.65 | 50.164  | 2013   | 2 | 710.33  | -0.95  |
| P0A1H5 EFTU_SALTY Elongation factor Tu                     | 36 |                                      | NMITGAAQMDGAILVVAATDGP MPQTREHILGR          | 90  | 34 | 0  | 10.92  |                                                                                                              | 3530.74 | 93.867  | 15113  | 4 | 883.44  | -13.35 |
| P0A1H5 EFTU_SALTY Elongation factor Tu                     | 37 |                                      | GITINTSHVEYDTPTR                            | 59  | 16 | 0  | 4.14   |                                                                                                              | 1785.86 | 50.182  | 9043   | 3 | 595.96  | -6.90  |
| P0A299 RL7_SALTY 50S ribosomal protein L7/L12              | 1  |                                      | DQIIEAVSAMSVM DVVELISAMEE K                 | 5   | 25 | 27 | 187.07 | b2*b2b3b4*b4b5b6b7*b7b8*b8b10b14y1y2*y2y3y4y5y6y7y9*y9y10y11y12y25                                           | 2737.34 | 137.096 | 29142  | 3 | 913.12  | 0.71   |
| P0A299 RL7_SALTY 50S ribosomal protein L7/L12              | 2  |                                      | SITK DQIIEAVSAMSVM DVVELISAMEE K            | 1   | 29 | 19 | 123.41 | b2*b2b5b9b14b16y1y2*y2y3y4y5y6y7y8y9*y9y10y12                                                                | 3166.61 | 136.446 | 9478   | 3 | 1056.21 | 5.17   |
| P0A299 RL7_SALTY 50S ribosomal protein L7/L12              | 3  |                                      | SLEEAGAEVEVK                                | 109 | 12 | 4  | 23.03  | b10y7y11*y11                                                                                                 | 1260.64 | 64.992  | 6096   | 2 | 630.82  | 6.20   |
| P0A299 RL7_SALTY 50S ribosomal protein L7/L12              | 4  |                                      | FGVSAAAAVAVAAGPAEAAEEK                      | 30  | 22 | 6  | 40.74  | b3y6y9y10y13y16                                                                                              | 1987.04 | 106.890 | 1902   | 2 | 994.02  | 12.59  |
| P0A299 RL7_SALTY 50S ribosomal protein L7/L12              | 5  |                                      | AAGANKVAVIK                                 | 60  | 11 | 12 | 131.58 | b3b7*b7b8b9b10y4y5y6y7*y7y9                                                                                  | 1041.63 | 29.607  | 50171  | 2 | 521.32  | -9.73  |
| P0A299 RL7_SALTY 50S ribosomal protein L7/L12              | 6  |                                      | MSITK DQIIEAVSAMSVM DVVELISAMEE K           | 0   | 30 | 4  | 17.54  | b3*b3b14b17                                                                                                  | 3297.63 | 99.350  | 7546   | 3 | 1099.88 | -1.92  |
| P0A299 RL7_SALTY 50S ribosomal protein L7/L12              | 7  | Phosphoryl STY(3)                    | GATGLGLKEAK                                 | 74  | 11 | 3  | 25.08  | b10y8y10                                                                                                     | 1124.57 | 61.565  | 19627  | 2 | 562.79  | 7.92   |
| P0A299 RL7_SALTY 50S ribosomal protein L7/L12              | 8  | Oxidation+M(22)                      | DQIIEAVSAMSVM DVVELISAMEE K                 | 5   | 25 | 5  | 40.32  | b9b16y12y13y14                                                                                               | 2753.35 | 136.649 | 4626   | 3 | 918.45  | 6.92   |
| P0A1P0 G3P1_SALTY Glyceraldehyde-3-phosphate dehydrogenase | 1  |                                      | VINDNFGIIEGLMTTVHATTATQK                    | 160 | 24 | 39 | 260.72 | b2b3b4*b4b5*b5*b5b6*b6b8*b8b14y1y3y5y6y7*y7y7y8*y8*y8y9y10*y10y11y14y15*y15y16y18*y18y19y20y21y22*y22y24*y24 | 2574.31 | 98.501  | 502819 | 3 | 858.78  | -4.17  |
| P0A1P0 G3P1_SALTY Glyceraldehyde-3-phosphate dehydrogenase | 2  |                                      | LVSWYDNETGYSNK                              | 307 | 14 | 15 | 142.72 | b8y2y3y4y5y6y7y8*y8y9y10y11y12*y12y14                                                                        | 1675.77 | 58.863  | 251159 | 2 | 838.39  | 7.65   |
| P0A1P0 G3P1_SALTY Glyceraldehyde-3-phosphate dehydrogenase | 3  |                                      | AGIALNDNFVK                                 | 296 | 11 | 21 | 126.81 | b3b4b10*b10*b10y1y2y3y4y5*y5y6*y6y7*y7y8*y8*y8y10y11*y11                                                     | 1161.62 | 61.995  | 224435 | 2 | 581.31  | -5.04  |

|                                                           |    |                                                      |                                   |     |    |    |        |                                                                                                          |         |         |        |   |         |        |
|-----------------------------------------------------------|----|------------------------------------------------------|-----------------------------------|-----|----|----|--------|----------------------------------------------------------------------------------------------------------|---------|---------|--------|---|---------|--------|
| [P0A1P0]G3P1_SALTY Glyceraldehyde-3-phohate dehydrogenase | 4  |                                                      | GASQNIIPSSTGAAK                   | 198 | 15 | 26 | 160.68 | b3b4°b4*b4b5°b5*b5b6°b6*b6b7°b7*b7b13b15y2y5y6°y6y7°y7y8y9y10y11y15                                      | 1401.73 | 41.612  | 196110 | 2 | 701.37  | -3.05  |
| [P0A1P0]G3P1_SALTY Glyceraldehyde-3-phohate dehydrogenase | 5  |                                                      | VLDLIAHISK                        | 321 | 10 | 10 | 89.63  | b2b3y2y3y4y5y6y7y8y10                                                                                    | 1108.66 | 65.298  | 113166 | 2 | 554.84  | -7.93  |
| [P0A1P0]G3P1_SALTY Glyceraldehyde-3-phohate dehydrogenase | 6  |                                                      | AATYEQIK                          | 249 | 8  | 4  | 41.73  | y4y5y6y8                                                                                                 | 923.47  | 31.377  | 113043 | 2 | 462.24  | -13.62 |
| [P0A1P0]G3P1_SALTY Glyceraldehyde-3-phohate dehydrogenase | 7  |                                                      | SDIEIVAINDLLDAEYMAYMLK            | 24  | 22 | 27 | 235.35 | b2b3b4°b4b5°b5b6°b6b7°b7b14b15y1y2y3y4y5y6y7y8y9y10y11y12y13y14y22                                       | 2530.24 | 126.223 | 89865  | 3 | 844.08  | -3.67  |
| [P0A1P0]G3P1_SALTY Glyceraldehyde-3-phohate dehydrogenase | 8  |                                                      | VPTPNVSVVDLTVR                    | 232 | 14 | 5  | 39.74  | y3y5y11y12y14                                                                                            | 1495.85 | 71.662  | 55170  | 2 | 748.43  | 1.22   |
| [P0A1P0]G3P1_SALTY Glyceraldehyde-3-phohate dehydrogenase | 9  |                                                      | VVLTGPSKDNTPMFVK                  | 116 | 16 | 12 | 77.57  | y2y9y10°y10*y10y11y12y13°y13y14y16*y16                                                                   | 1732.91 | 58.116  | 52248  | 3 | 578.31  | -12.26 |
| [P0A1P0]G3P1_SALTY Glyceraldehyde-3-phohate dehydrogenase | 10 |                                                      | VLPELNGK                          | 217 | 8  | 10 | 55.27  | b1b2y2y3y4*y4y5y6*y6y8                                                                                   | 869.50  | 45.359  | 36920  | 2 | 435.25  | -12.64 |
| [P0A1P0]G3P1_SALTY Glyceraldehyde-3-phohate dehydrogenase | 11 |                                                      | VGINGFGR                          | 4   | 8  | 3  | 36.96  | b3y3y7                                                                                                   | 819.45  | 42.446  | 16210  | 2 | 410.23  | -0.45  |
| [P0A1P0]G3P1_SALTY Glyceraldehyde-3-phohate dehydrogenase | 12 | Carbamidomethyl+C(18)<br>;Carbamidomethyl+C(22)<br>) | GANFDKYEGQDIVSNASCTTNCL<br>APLAK  | 132 | 28 | 37 | 351.95 | b3b4b5b6b7°b7b8°b8b9b10b11*b11b12°b12*b12b13b15b16b21b24°b24b26b27y4y5y6y8*y8y9y10y11y12*y12y13y14y15y16 | 3044.42 | 67.215  | 243020 | 3 | 1015.48 | 4.89   |
| [P0A1P0]G3P1_SALTY Glyceraldehyde-3-phohate dehydrogenase | 13 |                                                      | LVSWYDNETGYSNKVLDLIAHISK          | 307 | 24 | 9  | 92.98  | y3y4y5y7y15y19y20y21y22                                                                                  | 2765.38 | 96.880  | 203809 | 4 | 692.10  | -13.60 |
| [P0A1P0]G3P1_SALTY Glyceraldehyde-3-phohate dehydrogenase | 14 |                                                      | VLPELNGKLTGMAFR                   | 217 | 15 | 9  | 53.17  | b7°b7b11y4y5y6y10°y10*y10                                                                                | 1645.89 | 73.356  | 19410  | 3 | 549.30  | -10.31 |
| [P0A1P0]G3P1_SALTY Glyceraldehyde-3-phohate dehydrogenase | 15 |                                                      | GGRGASQNIIPSSTGAAK                | 195 | 18 | 6  | 41.88  | b5b7b8b9y8°y8                                                                                            | 1671.88 | 37.081  | 15030  | 2 | 836.45  | 3.87   |
| [P0A1P0]G3P1_SALTY Glyceraldehyde-3-phohate dehydrogenase | 16 |                                                      | SDIEIVAINDLLDAEYMAYMLKYD<br>STHGR | 24  | 29 | 4  | 11.81  | b10*b10b23y10                                                                                            | 3346.64 | 89.192  | 5645   | 4 | 837.41  | 11.53  |
| [P0A1P0]G3P1_SALTY Glyceraldehyde-3-phohate dehydrogenase | 17 |                                                      | DLIAHISK                          | 323 | 8  | 4  | 53.01  | b3b4b5b7                                                                                                 | 896.51  | 65.305  | 34657  | 2 | 448.76  | -10.48 |
| [P0A1P0]G3P1_SALTY Glyceraldehyde-3-phohate dehydrogenase | 18 |                                                      | LDLIAHISK                         | 322 | 9  | 1  | 8.43   | b3                                                                                                       | 1009.60 | 65.304  | 34043  | 2 | 505.30  | -8.28  |
| [P0A1P0]G3P1_SALTY Glyceraldehyde-3-phohate dehydrogenase | 19 |                                                      | LNDNFVK                           | 300 | 7  | 0  | 2.26   |                                                                                                          | 849.44  | 62.036  | 4921   | 1 | 849.44  | -9.84  |
| [P0A1P0]G3P1_SALTY Glyceraldehyde-3-phohate dehydrogenase | 20 |                                                      | LIAHISK                           | 324 | 7  | 2  | 21.17  | b4b6                                                                                                     | 781.48  | 65.302  | 2938   | 2 | 391.24  | -13.59 |
| [P0A1P0]G3P1_SALTY Glyceraldehyde-3-phohate dehydrogenase | 21 |                                                      | AATYEQIK                          | 249 | 8  | 0  | 1.13   |                                                                                                          | 905.46  | 31.355  | 39051  | 2 | 453.24  | -5.33  |

|                                                           |    |                       |                            |     |    |    |        |                                                                                                           |         |         |        |   |         |        |
|-----------------------------------------------------------|----|-----------------------|----------------------------|-----|----|----|--------|-----------------------------------------------------------------------------------------------------------|---------|---------|--------|---|---------|--------|
| [P0A1P0]G3P1_SALTY Glyceraldehyde-3-phohate dehydrogenase | 22 |                       | VVLTGPSKDNTPMFVK           | 116 | 16 | 0  | 4.14   |                                                                                                           | 1715.91 | 58.110  | 37508  | 2 | 858.46  | 7.47   |
| [P0A1S2]HNS_SALTY DNA-binding protein H-NS                | 1  |                       | EMLIADGIDPNELLNSMAAAK      | 62  | 21 | 39 | 262.77 | b2°b2b3°b3b4°b4b5°b5b6b7°b7b8°b8b9b11b12°b12b14b21y1y2y3y4y6°y6y7*y7y8y9y12y13y14y15y16°y16*y16y17*y17y21 | 2216.12 | 97.518  | 451899 | 2 | 1108.56 | 11.90  |
| [P0A1S2]HNS_SALTY DNA-binding protein H-NS                | 2  |                       | YSYVDENGETK                | 96  | 11 | 11 | 66.92  | y2y6y7*y7y8y9*y9y10°y10*y10y11                                                                            | 1304.56 | 33.502  | 76235  | 2 | 652.78  | -5.05  |
| [P0A1S2]HNS_SALTY DNA-binding protein H-NS                | 3  |                       | REEESAAAAEVEER             | 40  | 14 | 8  | 68.06  | b2b7y3y4y5y6y7y14                                                                                         | 1575.73 | 32.290  | 45850  | 2 | 788.37  | 4.03   |
| [P0A1S2]HNS_SALTY DNA-binding protein H-NS                | 4  | Carbamidomethyl+C(2)  | ECTLETLEEMLEK              | 19  | 13 | 5  | 33.35  | b4y8y9y11y13                                                                                              | 1624.76 | 93.202  | 21663  | 2 | 812.88  | 10.59  |
| [P0A1S2]HNS_SALTY DNA-binding protein H-NS                | 5  |                       | LQQYREMLIADGIDPNELLNSMAAAK | 57  | 26 | 8  | 33.91  | b7b9°b9b13y7y8*y8y12                                                                                      | 2904.49 | 100.198 | 16424  | 4 | 726.88  | 8.99   |
| [P0A1S2]HNS_SALTY DNA-binding protein H-NS                | 6  |                       | EEESAAAAEVEER              | 41  | 13 | 6  | 64.39  | b3y4y6y7y8y10                                                                                             | 1419.62 | 35.582  | 6480   | 2 | 710.31  | -0.77  |
| [P0A1S2]HNS_SALTY DNA-binding protein H-NS                | 7  |                       | TPAVIKK                    | 114 | 7  | 5  | 41.35  | b1y2y4y5y6                                                                                                | 756.49  | 20.243  | 5529   | 2 | 378.75  | -14.85 |
| [P0A1S2]HNS_SALTY DNA-binding protein H-NS                | 8  | Carbamidomethyl+C(6)  | AQARECTLETLEEMLEK          | 15  | 17 | 3  | 16.93  | b7y8y12                                                                                                   | 2050.99 | 92.163  | 1694   | 4 | 513.50  | 6.07   |
| [P0A1S2]HNS_SALTY DNA-binding protein H-NS                | 9  |                       | MSEALK                     | 0   | 6  | 1  | 13.91  | b5                                                                                                        | 678.36  | 75.882  | 5237   | 1 | 678.36  | 11.88  |
| [P0A1S2]HNS_SALTY DNA-binding protein H-NS                | 10 |                       | YSYVDENGETKTWTGQGR         | 96  | 18 | 29 | 203.24 | b3°b3b5°b5y3y4y5°y5*y5y6*y6y7°y7*y7y8°y8*y8y10°y10y11*y11y12y13y14*y14y15y16y17*y17                       | 2090.92 | 47.354  | 179222 | 3 | 697.65  | -10.04 |
| [P0A1S2]HNS_SALTY DNA-binding protein H-NS                | 11 | Carbamidomethyl+C(2)  | ECTLETLEEMLEKLEVVNER       | 19  | 21 | 27 | 257.78 | b3°b3b4°b4b6b7y3*y3y4*y4y5°y5y6y7y8y9y10y11y12y13y14y15y16y17°y17y19°y19                                  | 2563.26 | 123.982 | 113971 | 3 | 855.09  | 0.38   |
| [P0A1S2]HNS_SALTY DNA-binding protein H-NS                | 12 |                       | QLEDFLIKE                  | 128 | 9  | 3  | 39.1   | y3y4y7                                                                                                    | 1134.59 | 71.986  | 72164  | 2 | 567.80  | -10.76 |
| [P0A1S2]HNS_SALTY DNA-binding protein H-NS                | 13 |                       | LQQYREMLIADGIDPNELLNSMAAAK | 57  | 26 | 6  | 44.48  | b10b14y7y8y12y13                                                                                          | 2904.50 | 93.405  | 23075  | 3 | 968.84  | 12.69  |
| [P0A1S2]HNS_SALTY DNA-binding protein H-NS                | 14 | Carbamidomethyl+C(6)  | AQARECTLETLEEMLEK          | 15  | 17 | 3  | 23.92  | b14b15y3                                                                                                  | 2050.96 | 88.289  | 1811   | 3 | 684.32  | -10.00 |
| [P0A1S2]HNS_SALTY DNA-binding protein H-NS                | 15 | Oxidation+M(7)        | LQQYREMLIADGIDPNELLNSMAAAK | 57  | 26 | 5  | 18.96  | b3°b3b11b21y8                                                                                             | 2920.42 | 88.275  | 3092   | 3 | 974.15  | -10.28 |
| [P0A1S2]HNS_SALTY DNA-binding protein H-NS                | 16 |                       | AAEVEER                    | 47  | 7  | 0  | 3.39   |                                                                                                           | 803.39  | 32.259  | 2748   | 2 | 402.20  | 1.44   |
| [P64076]ENO_SALTY Enolase                                 | 1  |                       | FNQIGSLTETLAAIK            | 342 | 15 | 31 | 257.9  | b2°b2b3°b3b4°b4b5b6°b6°b6b7°b7b8b12°b12b13°b13b14y2y3y4y5y6y7y8y9y11y12y13y15*y15                         | 1605.88 | 86.261  | 289421 | 2 | 803.45  | -0.61  |
| [P64076]ENO_SALTY Enolase                                 | 2  |                       | SGETEDATIADLAVGTAAGQIK     | 371 | 22 | 33 | 219.26 | b1°b1b2°b2b3°b3b5b11b12°b12b14°b14b15b16b18b22y1y2y4y5y7y8y9y11y12*y12y13°y13y14y15y16y17y22              | 2118.07 | 76.072  | 165326 | 2 | 1059.54 | 4.26   |
| [P64076]ENO_SALTY Enolase                                 | 3  | Carbamidomethyl+C(16) | AAGYELGKDITLAMDCAASEFYKDGK | 231 | 26 | 20 | 127.37 | b2b3b4b6b9b11°b11y2y7y8°y8y9y12y13y14y16y20y21y24y26                                                      | 2824.28 | 98.259  | 146788 | 4 | 706.83  | -13.74 |

|                                                       |    |                 |                                                             |     |    |    |        |                                                                        |         |         |        |   |         |        |
|-------------------------------------------------------|----|-----------------|-------------------------------------------------------------|-----|----|----|--------|------------------------------------------------------------------------|---------|---------|--------|---|---------|--------|
| P64076 ENO_SALTY Enolase                              | 4  |                 | AFTSEEFTHFLEELTK                                            | 266 | 16 | 16 | 123.65 | b2b3°b3b11b12b16y3y4y5°<br>y5y6y7y8y10y13y16                           | 1928.91 | 103.358 | 109378 | 3 | 643.64  | -11.45 |
| P64076 ENO_SALTY Enolase                              | 5  |                 | GMNTAVGDEGGYAPNLGSNAEA<br>LAVIAEAVK                         | 200 | 31 | 23 | 116.67 | b2b4b5°b5b6°b6°b6b8b13<br>b30y1y2y3y5°y5y6y7y8y10<br>y15y18y19y31      | 2989.48 | 95.633  | 105224 | 3 | 997.16  | 6.70   |
| P64076 ENO_SALTY Enolase                              | 6  |                 | DAGYTAVISHR                                                 | 360 | 11 | 14 | 118.04 | b2b3b4b5y2y3y4y5y6°y6y7<br>y9°y9y11                                    | 1189.59 | 41.938  | 83508  | 2 | 595.30  | -3.49  |
| P64076 ENO_SALTY Enolase                              | 7  |                 | GMPLYEHIAELNGTPGK                                           | 126 | 17 | 9  | 59.89  | b2b10b12b15y3y4y5y11y1<br>7                                            | 1826.89 | 67.589  | 65072  | 3 | 609.63  | -11.23 |
| P64076 ENO_SALTY Enolase                              | 8  |                 | YSMPVPMMNIINGGEHADNNVDI<br>QEFMIPVGAK                       | 143 | 34 | 18 | 83.21  | b2°b2b3°b3b5°b5b6b10y3y<br>5y6°y6y7y8y13y29y31y34                      | 3759.79 | 99.030  | 61435  | 3 | 1253.94 | 7.66   |
| P64076 ENO_SALTY Enolase                              | 9  |                 | IQLVGDDLFTVNTK                                              | 311 | 14 | 13 | 91.84  | b2°b2b7b8y2y3y4y9y10y1<br>1°y11y12y14                                  | 1562.85 | 78.238  | 36952  | 2 | 781.93  | 4.92   |
| P64076 ENO_SALTY Enolase                              | 10 |                 | ILKEGIEK                                                    | 325 | 8  | 8  | 55.27  | b2y4°y4y5°y5y6y7y8                                                     | 929.56  | 29.401  | 33007  | 2 | 465.28  | -11.49 |
| P64076 ENO_SALTY Enolase                              | 11 |                 | IEEALGEK                                                    | 411 | 8  | 10 | 50.49  | b2b4b8y3°y3y6°y6y7°y7y8                                                | 888.46  | 31.630  | 18081  | 2 | 444.73  | -6.87  |
| P64076 ENO_SALTY Enolase                              | 12 |                 | VIGREIIDSR                                                  | 6   | 10 | 4  | 27.71  | b6b8y2y3                                                               | 1157.65 | 43.017  | 15522  | 2 | 579.33  | -12.44 |
| P64076 ENO_SALTY Enolase                              | 13 |                 | MGSEVFHHLAK                                                 | 184 | 11 | 5  | 49.14  | b7b10y4y6y7                                                            | 1255.61 | 42.416  | 81545  | 3 | 419.21  | -16.04 |
| P64076 ENO_SALTY Enolase                              | 14 |                 | GIANSILJK                                                   | 333 | 9  | 3  | 39.1   | y3y6y7                                                                 | 928.57  | 60.923  | 77449  | 2 | 464.79  | -11.50 |
| P64076 ENO_SALTY Enolase                              | 15 |                 | EIIDSR                                                      | 10  | 6  | 1  | 13.91  | b4                                                                     | 732.38  | 28.913  | 19694  | 1 | 732.38  | -8.42  |
| P64076 ENO_SALTY Enolase                              | 16 |                 | GNPTVEAEVHLEGGFVGMAAAPS<br>GASTGSR                          | 16  | 30 | 3  | 17.54  | y4y8y12                                                                | 2856.35 | 87.997  | 8946   | 3 | 952.79  | -3.68  |
| P64076 ENO_SALTY Enolase                              | 17 |                 | AAGYELGK                                                    | 231 | 8  | 3  | 49.51  | b3b5b7                                                                 | 808.44  | 38.656  | 1896   | 1 | 808.44  | 22.12  |
| P64076 ENO_SALTY Enolase                              | 18 |                 | VLGDKIQLVGDDLFTVNTK                                         | 306 | 19 | 14 | 100.58 | b7°b7b8b9y4°y4y5°y5y6y<br>8y10y11°y11y17                               | 2075.12 | 80.050  | 127107 | 3 | 692.38  | -6.59  |
| P64076 ENO_SALTY Enolase                              | 19 |                 | GMPLYEHIAELNGTPGKYSPMPV<br>MMNIINGGEHADNNVDIQEFMIQP<br>VGAK | 126 | 51 | 16 | 92.03  | b8b9b13°b13b14b20b22y3<br>y5y7y8y9y11y12y13°y13                        | 5567.66 | 98.317  | 97567  | 5 | 1114.34 | 1.23   |
| P64076 ENO_SALTY Enolase                              | 20 |                 | DGKYVLAGEGK                                                 | 254 | 12 | 6  | 45.53  | b4b11y3y4°y4y9                                                         | 1250.62 | 44.251  | 69677  | 2 | 625.81  | -12.88 |
| P64076 ENO_SALTY Enolase                              | 21 |                 | GKGMNTAVGDEGGYAPNLGSNA<br>EALAVIAEAVK                       | 198 | 33 | 6  | 25.36  | b4b5°b5b7b15y4                                                         | 3174.60 | 90.441  | 29283  | 3 | 1058.87 | 9.31   |
| P64076 ENO_SALTY Enolase                              | 22 |                 | SGETEDATIADLAVGTAAGQIKTG<br>SMSR                            | 371 | 28 | 4  | 12.01  | b3y4°y4y6                                                              | 2737.35 | 74.660  | 9116   | 3 | 913.12  | 7.94   |
| P64076 ENO_SALTY Enolase                              | 23 |                 | EIIDSRGNPTVEAEVHLEGGFVG<br>MAAPSASTGSR                      | 10  | 36 | 3  | 10.98  | b13y5y16                                                               | 3569.77 | 93.817  | 5969   | 3 | 1190.59 | 10.33  |
| P64076 ENO_SALTY Enolase                              | 24 |                 | DAGYTAVISHRSGETEDATIADLA<br>VGTAAGQIK                       | 360 | 33 | 5  | 36.9   | b6°b6b10b11b12                                                         | 3288.63 | 74.653  | 2145   | 4 | 822.91  | -0.82  |
| P64076 ENO_SALTY Enolase                              | 25 | Oxidation+M(18) | GNPTVEAEVHLEGGFVGMAAAPS<br>GASTGSR                          | 16  | 30 | 4  | 11.63  | b10°b10b19y5                                                           | 2872.35 | 92.700  | 8880   | 3 | 958.12  | -0.34  |
| P64076 ENO_SALTY Enolase                              | 26 | Oxidation+M(2)  | IMIDLDGTENK                                                 | 92  | 11 | 4  | 28.09  | b7b8y8°y8                                                              | 1264.61 | 31.063  | 3535   | 3 | 422.21  | 2.41   |
| P64076 ENO_SALTY Enolase                              | 27 |                 | GYTAVISHR                                                   | 362 | 9  | 2  | 8.01   | b3°b3                                                                  | 1003.53 | 41.947  | 30495  | 2 | 502.27  | -4.74  |
| P64076 ENO_SALTY Enolase                              | 28 |                 | LKEGIEK                                                     | 326 | 7  | 0  | 1.13   |                                                                        | 816.47  | 29.409  | 22988  | 2 | 408.74  | -12.78 |
| P64076 ENO_SALTY Enolase                              | 29 |                 | AGYTAVISHR                                                  | 361 | 10 | 0  | 2.26   |                                                                        | 1074.57 | 41.937  | 14319  | 2 | 537.79  | 1.36   |
| P64076 ENO_SALTY Enolase                              | 30 |                 | GREIIDSR                                                    | 8   | 8  | 2  | 22.93  | b3b4                                                                   | 945.50  | 43.018  | 4321   | 2 | 473.26  | -7.10  |
| P64076 ENO_SALTY Enolase                              | 31 |                 | TSEEFTHFLEELTK                                              | 268 | 14 | 3  | 35.2   | b10b11b12                                                              | 1710.83 | 103.385 | 2877   | 2 | 855.92  | 3.57   |
| P64076 ENO_SALTY Enolase                              | 32 |                 | AFTSEEFTHFLEELTK                                            | 266 | 16 | 0  | 4.14   |                                                                        | 1910.89 | 103.352 | 3950   | 3 | 637.64  | -10.67 |
| P17215 LIVJ_SALTY Leu/Ile/Val/Thr-<br>binding protein | 1  |                 | NYDQVPANKPIVDAIK                                            | 271 | 16 | 18 | 137.45 | b2°b2b3°b3°b3b4°b4b5y2<br>y3y5y7y9y10y11y12y13y1<br>6                  | 1784.93 | 54.360  | 241820 | 3 | 595.65  | -14.84 |
| P17215 LIVJ_SALTY Leu/Ile/Val/Thr-<br>binding protein | 2  |                 | TQFMGPEGVANVLSNIAGESAE<br>GLLVTKPK                          | 240 | 31 | 24 | 191.62 | b2b3b4b5b9b12y2y3y4y5y<br>6y8y13y14y17y19y20y22y<br>26y27°y27y28y29y31 | 3144.63 | 89.048  | 229426 | 3 | 1048.88 | 1.09   |

|                                                   |    |                                          |                                                        |     |    |    |        |                                                                                                                                                              |         |         |        |   |         |       |
|---------------------------------------------------|----|------------------------------------------|--------------------------------------------------------|-----|----|----|--------|--------------------------------------------------------------------------------------------------------------------------------------------------------------|---------|---------|--------|---|---------|-------|
| P17215 LIVJ_SALTY Leu/Ile/Val/Thr-binding protein | 3  |                                          | TTGLDSDQGPTAAK                                         | 137 | 14 | 30 | 198.62 | b2°b2b3°b3b4b5°b5b8b10*<br>b10b11b12°b12°b12y1y2y<br>3y5y6y8y9°y9*y9y10°y10*<br>y10y11y12*y12y14                                                             | 1361.65 | 30.111  | 205507 | 2 | 681.33  | -3.68 |
| P17215 LIVJ_SALTY Leu/Ile/Val/Thr-binding protein | 4  |                                          | ENIDFVYYGGYHPMGQILR                                    | 212 | 20 | 16 | 101.23 | b2b4°b4°b4y3y6y8y9y12°y<br>12*y12y13y14y16y17y20                                                                                                             | 2401.12 | 80.556  | 103418 | 3 | 801.05  | -1.53 |
| P17215 LIVJ_SALTY Leu/Ile/Val/Thr-binding protein | 5  | Carbamidomethyl+C(7)                     | YVIGHLCSSSTQPASDIYEDEGILM<br>ITPAATAPELTAR             | 92  | 38 | 24 | 190.92 | b2b7b10b12°b12b14°b14b<br>23b24b25b26b27y1y4y5y6<br>y7y8y11y12y13y14y15y38                                                                                   | 4078.01 | 89.956  | 99363  | 3 | 1360.01 | 7.18  |
| P17215 LIVJ_SALTY Leu/Ile/Val/Thr-binding protein | 6  |                                          | GGVNVVFFDGITAGEKDFSTLVA<br>R                           | 185 | 24 | 21 | 190.21 | b4b5°b5b6°b6b13y2y5y6y<br>7y8y12y13y15y16y17y18y<br>19y20y21y24                                                                                              | 2499.28 | 102.280 | 96819  | 3 | 833.76  | -3.42 |
| P17215 LIVJ_SALTY Leu/Ile/Val/Thr-binding protein | 7  |                                          | VAVVGAMSGPVAQYGDQEFTGA<br>EQAIADINAK                   | 25  | 32 | 12 | 63.33  | b1b3b6b14y3y5y6y7y10y1<br>2y13y32                                                                                                                            | 3207.59 | 90.585  | 83249  | 3 | 1069.87 | 8.75  |
| P17215 LIVJ_SALTY Leu/Ile/Val/Thr-binding protein | 8  |                                          | QDPSGAFVWTTYAALQSLQAGLN<br>HSDDPAEIAK                  | 290 | 33 | 5  | 11.22  | b10°b10y8y10y33                                                                                                                                              | 3501.73 | 109.906 | 9017   | 3 | 1167.92 | 11.16 |
| P17215 LIVJ_SALTY Leu/Ile/Val/Thr-binding protein | 9  |                                          | GATVDTVMGPLSWDEK                                       | 326 | 16 | 3  | 17.8   | b3b11y9                                                                                                                                                      | 1705.82 | 79.034  | 5806   | 2 | 853.41  | 6.94  |
| P17215 LIVJ_SALTY Leu/Ile/Val/Thr-binding protein | 10 |                                          | GFEFGVFDWHANGTATDAK                                    | 346 | 19 | 4  | 22.45  | b2y5y7y14                                                                                                                                                    | 2069.96 | 84.087  | 2451   | 2 | 1035.48 | 12.50 |
| P17215 LIVJ_SALTY Leu/Ile/Val/Thr-binding protein | 11 |                                          | KQDPSGAFVWTTYAALQSLQAGL<br>NHSDPAEIAK                  | 289 | 34 | 46 | 335.79 | b3°b3°b3b5°b5°b5b6°b6b7<br>*b7b8°b8b9b10b12°b12b1<br>3°b13b14°b14b15b18b28y<br>3y6y7y9y11y12y14°y14y15<br>°y15°y15y16y17y18°y18y1<br>9y20°y20y21y22y23y24y25 | 3629.77 | 102.849 | 327284 | 4 | 908.20  | -5.11 |
| P17215 LIVJ_SALTY Leu/Ile/Val/Thr-binding protein | 12 |                                          | TQFMGPEGVANVSLNIAGESAE<br>GLLVTKPKNYDQVPANKPIVD<br>AIK | 240 | 47 | 5  | 14.4   | b10b25y3y10y30                                                                                                                                               | 4910.55 | 86.690  | 23149  | 5 | 982.92  | -2.59 |
| P17215 LIVJ_SALTY Leu/Ile/Val/Thr-binding protein | 13 | Carbamidomethyl+C(14)                    | VVNDGIKYVIGHLCSSSTQPASDI<br>YEDEGILMITPAATAPELTAR      | 85  | 45 | 9  | 50.42  | b4b5b19y3y4y6y7y11y13                                                                                                                                        | 4803.41 | 94.662  | 20140  | 4 | 1201.61 | 4.47  |
| P17215 LIVJ_SALTY Leu/Ile/Val/Thr-binding protein | 14 |                                          | KGGVNVVFFDGITAGEK                                      | 184 | 17 | 5  | 16.93  | b5°b5y3°y3y16                                                                                                                                                | 1737.92 | 33.353  | 17987  | 4 | 435.24  | 3.37  |
| P17215 LIVJ_SALTY Leu/Ile/Val/Thr-binding protein | 15 |                                          | KENIDFVYYGGYHPMGQILR                                   | 211 | 21 | 3  | 14.38  | b5b10y8                                                                                                                                                      | 2529.25 | 48.230  | 2827   | 3 | 843.76  | 11.29 |
| P17215 LIVJ_SALTY Leu/Ile/Val/Thr-binding protein | 16 |                                          | GDLKGFEFGVFDWHANGTATDA<br>K                            | 342 | 23 | 5  | 38.67  | b7y7y9y10y11                                                                                                                                                 | 2483.14 | 86.640  | 2323   | 3 | 828.39  | -8.55 |
| P17215 LIVJ_SALTY Leu/Ile/Val/Thr-binding protein | 17 | Oxidation+M(8)                           | GATVDTVMGPLSWDEK                                       | 326 | 16 | 3  | 17.8   | b3b6y7                                                                                                                                                       | 1721.83 | 62.922  | 4784   | 3 | 574.61  | 13.82 |
| P17215 LIVJ_SALTY Leu/Ile/Val/Thr-binding protein | 18 | Carbamidomethyl+C(6);<br>Oxidation+M(14) | TLLAGCIALSLSHMAFADDIK                                  | 4   | 21 | 5  | 25.52  | b14°b14y7y12y13                                                                                                                                              | 2263.13 | 95.341  | 4452   | 3 | 755.05  | -8.85 |
| Q8ZK80 RL9_SALTY 50S ribosomal protein L9         | 1  |                                          | LADVLAANAR                                             | 57  | 11 | 15 | 113.27 | b2b3°b3b4°b4b8y1y4y5y6*<br>y6y7y9y10y11                                                                                                                      | 1084.60 | 53.911  | 137011 | 2 | 542.80  | -8.55 |
| Q8ZK80 RL9_SALTY 50S ribosomal protein L9         | 2  |                                          | VANLGSLGDQVNVK                                         | 8   | 14 | 19 | 178.09 | b1b2b3b4b6b12b13y3y4y6<br>y7y8y9y10*y10y11y12y14<br>*y14                                                                                                     | 1413.77 | 57.454  | 84787  | 2 | 707.39  | 0.69  |
| Q8ZK80 RL9_SALTY 50S ribosomal protein L9         | 3  |                                          | MQVILLDK                                               | 0   | 8  | 7  | 64.03  | b2b3y3y4y5y6y8                                                                                                                                               | 959.55  | 64.839  | 60652  | 2 | 480.28  | -9.29 |
| Q8ZK80 RL9_SALTY 50S ribosomal protein L9         | 4  |                                          | DIADAVTAAGVDVAK                                        | 97  | 15 | 5  | 46     | b13y3y7y9y13                                                                                                                                                 | 1415.74 | 66.958  | 54612  | 2 | 708.37  | 2.50  |

|                                                         |    |                       |                                   |     |    |    |        |                                                                    |         |         |        |   |         |        |
|---------------------------------------------------------|----|-----------------------|-----------------------------------|-----|----|----|--------|--------------------------------------------------------------------|---------|---------|--------|---|---------|--------|
| Q8ZK80 RL9_SALTY 50S ribosomal protein L9               | 5  |                       | INALETVTIASK                      | 71  | 12 | 6  | 41.21  | b3*b3b4y10y11y12                                                   | 1259.72 | 61.720  | 32155  | 2 | 630.36  | -3.39  |
| Q8ZK80 RL9_SALTY 50S ribosomal protein L9               | 6  |                       | LFGSIGTR                          | 89  | 8  | 4  | 52.26  | b4b7y6y7                                                           | 850.47  | 52.387  | 15846  | 2 | 425.74  | -9.69  |
| Q8ZK80 RL9_SALTY 50S ribosomal protein L9               | 7  |                       | TTGEHEVNFQVHSEVFAK                | 123 | 18 | 6  | 16.16  | b1b2b9b11y16y18                                                    | 2059.01 | 67.627  | 11260  | 2 | 1030.01 | 9.72   |
| Q8ZK80 RL9_SALTY 50S ribosomal protein L9               | 8  |                       | NVEYFEARR                         | 42  | 9  | 4  | 31.32  | b5b7y7y9                                                           | 1183.57 | 37.778  | 5399   | 2 | 592.29  | -12.07 |
| Q8ZK80 RL9_SALTY 50S ribosomal protein L9               | 9  |                       | AGDEGKLFSGIGTR                    | 83  | 14 | 8  | 67.92  | b7b10°b10b12y3y6y7y8                                               | 1407.70 | 55.074  | 79108  | 3 | 469.91  | -14.13 |
| Q8ZK80 RL9_SALTY 50S ribosomal protein L9               | 10 |                       | KNVEYFEAR                         | 41  | 9  | 3  | 31.32  | b7b8y4                                                             | 1155.58 | 87.052  | 2074   | 2 | 578.29  | -2.96  |
| Q8ZK80 RL9_SALTY 50S ribosomal protein L9               | 11 | Phosphoryl STY(15)    | LFGSIGTRDIADAVTAAGVDVAK           | 89  | 23 | 5  | 20.88  | b3b7b13°b13y9                                                      | 2327.19 | 78.956  | 1586   | 2 | 1164.10 | 14.58  |
| P66593 RS6_SALTY 30S ribosomal protein S6               | 1  |                       | AHYVLMNVEAPQEVIDELETTFR           | 56  | 23 | 24 | 181.64 | b2b3b4b5b8b9b10b13°b13y2y3y4y5°y5y6y7°y7y8y9y11°y11y13y14y23       | 2704.33 | 110.516 | 127236 | 3 | 902.11  | 0.36   |
| P66593 RS6_SALTY 30S ribosomal protein S6               | 2  |                       | YSAAITGAEGK                       | 24  | 11 | 18 | 117.08 | b2°b2b3°b3b4°b4y2y3°y3y4y5y6°y6y7°y7y9y10y11                       | 1067.52 | 34.023  | 94714  | 2 | 534.27  | -11.78 |
| P66593 RS6_SALTY 30S ribosomal protein S6               | 3  |                       | FNDAVIR                           | 79  | 7  | 11 | 84.97  | b3°b3b5y1y2y3y4y5y6*y6y7                                           | 834.43  | 42.511  | 57138  | 2 | 417.72  | -14.56 |
| P66593 RS6_SALTY 30S ribosomal protein S6               | 4  |                       | HAVTEASPMVK                       | 93  | 11 | 17 | 164.67 | b2b3b4°b4b5°b5b6b7°b7b10y5y6y7y8y9y10y11                           | 1169.59 | 30.786  | 39660  | 2 | 585.30  | -5.43  |
| P66593 RS6_SALTY 30S ribosomal protein S6               | 5  |                       | HYEIVFMVHPDQSEQVPGMIER            | 2   | 22 | 3  | 23.78  | b3b7b8                                                             | 2641.20 | 37.389  | 52303  | 3 | 881.07  | -18.86 |
| P66593 RS6_SALTY 30S ribosomal protein S6               | 6  |                       | AHYVLMNVEAPQEVIDELETTFRFNDAVIR    | 56  | 30 | 24 | 230.38 | b3b4b6b7b8b9°b9b10b11b14b17y4y11y12y13y14y15y16y17y18y20*y20y21y22 | 3519.74 | 115.460 | 74014  | 4 | 880.69  | -5.76  |
| P66593 RS6_SALTY 30S ribosomal protein S6               | 7  |                       | YSAAITGAEGKIHR                    | 24  | 14 | 4  | 19.98  | b6°b6y3y8                                                          | 1473.76 | 38.310  | 5441   | 3 | 491.93  | -11.43 |
| P66593 RS6_SALTY 30S ribosomal protein S6               | 8  |                       | HYEIVFMVHPDQSEQVPGMIERYSAAITGAEGK | 2   | 33 | 8  | 36.42  | b4b5°b5y4°y4y10y12y16                                              | 3689.78 | 120.244 | 2953   | 5 | 738.76  | 2.38   |
| P02910 HISJ_SALTY Histidine-binding periplasmic protein | 1  |                       | VGVLQGTQTETFGNEHWAPK              | 135 | 20 | 21 | 161.73 | b1b2b4b11°b11y3y4y5y6y8y9*y9y10y11y12°y12*y12y14y15y17y20          | 2199.08 | 64.023  | 175905 | 3 | 733.70  | -2.44  |
| P02910 HISJ_SALTY Histidine-binding periplasmic protein | 2  |                       | IGTDPTYAPFESK                     | 29  | 13 | 23 | 164.18 | b2b3°b3b4°b4b10y2°y2y3°y3y4y5°y5y6y7y8y9y10°y10y11y12°y12y13       | 1425.69 | 56.208  | 129352 | 2 | 713.35  | 1.37   |
| P02910 HISJ_SALTY Histidine-binding periplasmic protein | 3  |                       | NSDIQPTVASLK                      | 120 | 12 | 21 | 144.52 | b2°b2b3°b3°b3b4°b4b5y1y3y4y5y7y8°y8*y8y9y10*y10y11y12              | 1272.68 | 48.912  | 109961 | 2 | 636.84  | -0.96  |
| P02910 HISJ_SALTY Histidine-binding periplasmic protein | 4  | Carbamidomethyl+C(5)  | INTQCTFVENPLDALIPSLK              | 62  | 20 | 18 | 134.47 | b3b8b16°b16y1y2y3y4°y4y5y6y7y8y10y11y13y16y20                      | 2273.21 | 104.337 | 96678  | 2 | 1137.11 | 10.53  |
| P02910 HISJ_SALTY Histidine-binding periplasmic protein | 5  |                       | NAQGELVGFDIDLAK                   | 42  | 15 | 8  | 38.39  | b1b3b5b7°b7y3y12y15                                                | 1589.83 | 79.935  | 31197  | 2 | 795.42  | 7.68   |
| P02910 HISJ_SALTY Histidine-binding periplasmic protein | 6  |                       | FGGPAVKDEK                        | 201 | 10 | 11 | 83.09  | b2y1y2°y2y3y4y5y6y7y9y10                                           | 1047.54 | 27.061  | 27284  | 2 | 524.27  | -9.56  |
| P02910 HISJ_SALTY Histidine-binding periplasmic protein | 7  | Carbamidomethyl+C(18) | NAQGELVGFDIDLAKELCK               | 42  | 19 | 8  | 34.54  | b2b13y2y5y6y8y12y19                                                | 2120.06 | 86.797  | 24192  | 3 | 707.36  | -5.41  |
| P02910 HISJ_SALTY Histidine-binding periplasmic protein | 8  |                       | QQEIAFTDK                         | 99  | 9  | 4  | 31.32  | b4°b4y3y5                                                          | 1079.54 | 53.811  | 1553   | 2 | 540.28  | 6.22   |



|                                                         |    |                       |                                       |     |    |    |        |                                                                                       |         |         |        |   |         |        |
|---------------------------------------------------------|----|-----------------------|---------------------------------------|-----|----|----|--------|---------------------------------------------------------------------------------------|---------|---------|--------|---|---------|--------|
| P02910 HISJ_SALTY Histidine-binding periplasmic protein | 9  |                       | LFGVGTGMGLR                           | 211 | 11 | 3  | 36.84  | y4y7y9                                                                                | 1107.60 | 40.535  | 11929  | 2 | 554.30  | 0.99   |
| P02910 HISJ_SALTY Histidine-binding periplasmic protein | 10 |                       | AFAEMR                                | 234 | 6  | 2  | 27.44  | b3y3                                                                                  | 724.34  | 36.431  | 6333   | 1 | 724.34  | -5.65  |
| P02910 HISJ_SALTY Histidine-binding periplasmic protein | 11 |                       | KYFDFDVYGG                            | 250 | 10 | 5  | 55.75  | b3b7b8y3y4                                                                            | 1210.54 | 75.198  | 47643  | 2 | 605.77  | -0.50  |
| P02910 HISJ_SALTY Histidine-binding periplasmic protein | 12 |                       | IDAAFQDEVAASEGFLKQPVGK                | 176 | 22 | 3  | 13.91  | b3y4y18                                                                               | 2320.17 | 78.734  | 33723  | 3 | 774.06  | -3.05  |
| P02910 HISJ_SALTY Histidine-binding periplasmic protein | 13 | Phosphoryl STY(9)     | IDAIMSSLSITEKR                        | 85  | 14 | 5  | 46.75  | b6b8b9_HPO3<br>b9b10_H3PO4 b10y8                                                      | 1643.82 | 51.338  | 1836   | 2 | 822.41  | 14.11  |
| P02910 HISJ_SALTY Histidine-binding periplasmic protein | 14 | Phosphoryl STY(10)    | NSDIQPTVASLK                          | 120 | 12 | 6  | 51.06  | b6b7b9°b9b11y6                                                                        | 1352.65 | 136.498 | 1689   | 1 | 1352.65 | 8.03   |
| P02910 HISJ_SALTY Histidine-binding periplasmic protein | 15 |                       | GGPAVKDEK                             | 202 | 9  | 3  | 34.7   | b3b4b8                                                                                | 900.47  | 27.062  | 9491   | 2 | 450.74  | -9.01  |
| P25077 MDH_SALTY Malate dehydrogenase                   | 1  |                       | NQLPSGSELSDYDIAPVTPGVAVD<br>LSHIPTAVK | 21  | 33 | 26 | 91.67  | b1*b1b2*b2b3*b3b6b8b9°<br>b9b10°b10*b10b12b13b15<br>*b15y1y3y5y15y18y19y30°<br>y30y33 | 3388.82 | 94.467  | 173094 | 3 | 1130.28 | 5.98   |
| P25077 MDH_SALTY Malate dehydrogenase                   | 2  | Carbamidomethyl+C(2)  | ACVGIITNPVNTTVAIAAEVLKK               | 111 | 23 | 20 | 170.23 | b2b3b4b5b6b12y2y3y4y5y<br>6y12y13y15°y15y16y18y20<br>y21y23                           | 2382.33 | 105.115 | 160044 | 3 | 794.78  | -4.51  |
| P25077 MDH_SALTY Malate dehydrogenase                   | 3  |                       | VAVLGAAGGIGQALALLK                    | 2   | 19 | 29 | 317.53 | b2b3b5b6b7b8b9b10b14b1<br>5b16b17b18y1y2y3y4y5y6<br>y7y9y10y11y12y13y15y16<br>y19*y19 | 1735.08 | 120.245 | 143843 | 2 | 868.04  | -0.84  |
| P25077 MDH_SALTY Malate dehydrogenase                   | 4  |                       | FFSQPLLLGK                            | 262 | 10 | 10 | 76.1   | b2b3°b3y2y3y4y5y6y8y10                                                                | 1149.66 | 76.380  | 119219 | 2 | 575.33  | -8.18  |
| P25077 MDH_SALTY Malate dehydrogenase                   | 5  |                       | IQNAGTEVVEAK                          | 205 | 12 | 20 | 138.5  | b2*b2b3b4b10°b10y2y3°y3<br>y4y5y6y7y8°y8y9y10°y10*<br>y10y12                          | 1258.66 | 35.222  | 109387 | 2 | 629.83  | -4.75  |
| P25077 MDH_SALTY Malate dehydrogenase                   | 6  |                       | AGGGSATLSMGQAAAR                      | 217 | 16 | 14 | 91.89  | b16y6y7*y7y8y9°y9y10°y1<br>0*y10y11*y11y12y16                                         | 1405.68 | 40.657  | 87691  | 2 | 703.35  | -1.30  |
| P25077 MDH_SALTY Malate dehydrogenase                   | 7  |                       | DIQLGEDFINK                           | 301 | 11 | 7  | 37.82  | b2b3b11y5y7y8y11                                                                      | 1291.65 | 68.558  | 70550  | 2 | 646.33  | -2.17  |
| P25077 MDH_SALTY Malate dehydrogenase                   | 8  |                       | NLVQQIAK                              | 99  | 8  | 6  | 36.96  | b2b3y2y3y6y8                                                                          | 913.53  | 49.506  | 64634  | 2 | 457.27  | -14.16 |
| P25077 MDH_SALTY Malate dehydrogenase                   | 9  |                       | SIGTLSAFEQHSLDAMLDTLKK                | 279 | 22 | 6  | 13.91  | b2b3y2y17y20y22                                                                       | 2405.23 | 95.071  | 55194  | 3 | 802.42  | -2.64  |
| P25077 MDH_SALTY Malate dehydrogenase                   | 10 |                       | SDLFNVNAGIVK                          | 87  | 12 | 9  | 65.27  | b2b3b4y2y4y6y8y9y12                                                                   | 1276.69 | 70.229  | 35169  | 2 | 638.85  | 2.29   |
| P25077 MDH_SALTY Malate dehydrogenase                   | 11 |                       | KDIQLGEDFINK                          | 300 | 12 | 5  | 27.01  | b11*b11y8y9y12                                                                        | 1419.74 | 49.638  | 9834   | 3 | 473.92  | -2.49  |
| P25077 MDH_SALTY Malate dehydrogenase                   | 12 |                       | GFSGEDATPALEGADVVLISAGVA<br>R         | 56  | 25 | 4  | 12.8   | b3y4y6y25                                                                             | 2402.24 | 91.585  | 8109   | 2 | 1201.62 | 9.45   |
| P25077 MDH_SALTY Malate dehydrogenase                   | 13 |                       | FGLSLVR                               | 233 | 7  | 6  | 54.89  | y3y4°y4y5y6°y6                                                                        | 791.46  | 67.091  | 94441  | 2 | 396.23  | -18.82 |
| P25077 MDH_SALTY Malate dehydrogenase                   | 14 |                       | SIGTLSAFEQHSLDAMLDTLK                 | 279 | 21 | 3  | 21.02  | y7y11y13                                                                              | 2277.12 | 101.148 | 3051   | 3 | 759.71  | -10.83 |
| P25077 MDH_SALTY Malate dehydrogenase                   | 15 |                       | NGVEER                                | 272 | 6  | 1  | 13.91  | b4                                                                                    | 703.34  | 100.209 | 2098   | 1 | 703.34  | 2.00   |
| P25077 MDH_SALTY Malate dehydrogenase                   | 16 |                       | IKGFSGEDATPALEGADVVLISAG<br>VAR       | 54  | 27 | 7  | 54.94  | b8b14y3y4y5y6y8                                                                       | 2643.41 | 87.600  | 38255  | 3 | 881.81  | 3.05   |
| P25077 MDH_SALTY Malate dehydrogenase                   | 17 | Carbamidomethyl+C(11) | ALQGEKGVVECA YVEGDGQYAR               | 240 | 22 | 11 | 98.11  | b5b12*b12b13y3y4y5y7y8<br>y9y10                                                       | 2399.13 | 52.588  | 21379  | 3 | 800.38  | 0.00   |
| P25077 MDH_SALTY Malate dehydrogenase                   | 18 |                       | FFSQPLLLGKNGVEER                      | 262 | 16 | 5  | 31.75  | b5°b5b6y5y8                                                                           | 1833.97 | 80.666  | 15988  | 2 | 917.49  | -8.32  |

|                                       |    |                   |                               |     |    |    |        |                                                                                |         |         |        |   |         |        |
|---------------------------------------|----|-------------------|-------------------------------|-----|----|----|--------|--------------------------------------------------------------------------------|---------|---------|--------|---|---------|--------|
| P25077 MDH_SALTY Malate dehydrogenase | 19 |                   | IQNAGTEVVEAKAGGGSATLSMG QAAAR | 205 | 28 | 5  | 35.68  | y8y12y14y17y20                                                                 | 2645.33 | 96.199  | 5621   | 3 | 882.45  | -1.02  |
| P25077 MDH_SALTY Malate dehydrogenase | 20 |                   | AGGGSATLSMGQAAARFGLSLVR       | 217 | 23 | 6  | 30.55  | b3b9b13b14*b14y3                                                               | 2178.12 | 78.187  | 2297   | 2 | 1089.57 | -9.30  |
| P25077 MDH_SALTY Malate dehydrogenase | 21 | Oxidation+M(16)   | SIGTLSAFEQHSLDAMLDTLKK        | 279 | 22 | 5  | 22.66  | b13*b13y12y13*y13                                                              | 2421.23 | 85.157  | 3107   | 4 | 606.06  | -0.20  |
| P25077 MDH_SALTY Malate dehydrogenase | 22 | Oxidation+M(10)   | AGGGSATLSMGQAAAR              | 217 | 16 | 4  | 17.8   | b6b8y10*y10                                                                    | 1421.69 | 40.785  | 2929   | 2 | 711.35  | 6.44   |
| P25077 MDH_SALTY Malate dehydrogenase | 23 |                   | GTLSAFEQHSLDAMLDTLKK          | 281 | 20 | 0  | 6.4    |                                                                                | 2205.10 | 95.046  | 3919   | 3 | 735.71  | -8.75  |
| P0A1D5 CH10_SALTY 10 kDa chaperonin   | 1  |                   | ILDNGTVQPLDVK                 | 47  | 13 | 27 | 233.09 | b2b3*b3b6*b6b7b8*b8b9b10b12*b12y2y3y4y5y6*y6y7y8y9y10y11*y11*y11y12y13         | 1411.78 | 58.107  | 197310 | 2 | 706.39  | -1.04  |
| P0A1D5 CH10_SALTY 10 kDa chaperonin   | 2  |                   | VGDIVIFNDGYGVK                | 60  | 14 | 19 | 195.61 | b2b3b4b5*y5b6b11b13y3y4y5y6y7y8y9y10*y10y13y14                                 | 1495.78 | 74.103  | 152758 | 2 | 748.39  | 0.49   |
| P0A1D5 CH10_SALTY 10 kDa chaperonin   | 3  |                   | SAGGIVLTGSAAGK                | 20  | 14 | 11 | 94.34  | b7y2y3y4y6y7y8*y8y9y12y14                                                      | 1188.65 | 44.398  | 124672 | 2 | 594.83  | -7.29  |
| P0A1D5 CH10_SALTY 10 kDa chaperonin   | 4  |                   | GEIIVGVK                      | 37  | 8  | 6  | 55.27  | y2y3y4y5y6y8                                                                   | 786.46  | 42.138  | 23853  | 2 | 393.73  | -12.34 |
| P0A1D5 CH10_SALTY 10 kDa chaperonin   | 5  |                   | STRGEIIVGVK                   | 34  | 11 | 11 | 131.58 | b3b4*b4b5b6b7b8b9y3y4y5                                                        | 1130.64 | 37.893  | 89529  | 2 | 565.83  | -8.31  |
| P0A1D5 CH10_SALTY 10 kDa chaperonin   | 6  |                   | ILDNGTVQPLDVKVGDIVIFNDGY GVK  | 47  | 27 | 4  | 18.32  | y3y10*y10y12                                                                   | 2888.53 | 91.525  | 11906  | 3 | 963.51  | -3.72  |
| P0A1D5 CH10_SALTY 10 kDa chaperonin   | 7  |                   | VGDIVIFNDGYGVKSEK             | 60  | 17 | 4  | 40.08  | b10b11b12b14                                                                   | 1839.93 | 137.677 | 1519   | 2 | 920.47  | -12.87 |
| P0A1D5 CH10_SALTY 10 kDa chaperonin   | 8  | Phosphoryl STY(8) | SAGGIVLTGSAAGK                | 20  | 14 | 5  | 28.58  | b7b9y8_H3PO4 y8y12*y12                                                         | 1268.61 | 51.354  | 2043   | 3 | 423.54  | -1.64  |
| P06179 FLIC_SALTY Flagellin           | 1  |                   | AQILQQAGTSVLAQANQVPQNVLSLLR   | 468 | 27 | 30 | 217.7  | b2*b2b3b4b5b6*b6b7*b7b8*b8b11*b11b15*b15b17b18y1y2y3y4y5y6y9y10y11y12y13y14y27 | 2860.61 | 105.902 | 115601 | 3 | 954.21  | 1.88   |
| P06179 FLIC_SALTY Flagellin           | 2  |                   | SQSALGTAIER                   | 20  | 11 | 10 | 57.38  | b2*b2b5y4y6y7*y7y9*y9y11                                                       | 1132.59 | 42.641  | 52826  | 2 | 566.80  | -6.57  |
| P06179 FLIC_SALTY Flagellin           | 3  |                   | AQVINTNSLSLLTQNNLNK           | 1   | 19 | 14 | 50.15  | b2*b2b3*b3b4y1y2y6*y6y8*y8y13y15y19                                            | 2085.14 | 75.502  | 42245  | 2 | 1043.08 | 6.91   |
| P06179 FLIC_SALTY Flagellin           | 4  |                   | FNSAITNLGNTVNNLTSAR           | 432 | 19 | 21 | 127.51 | b2b3*b3*b3b4*b4b5*b5*b5b6b11b12b13*b13b14*b14y4y7y13y14y19                     | 2007.04 | 78.962  | 36464  | 2 | 1004.02 | 6.99   |
| P06179 FLIC_SALTY Flagellin           | 5  |                   | VSDTAATVTGYADTTIALDNSTFK      | 180 | 24 | 8  | 20.18  | b15y8*y8y13*y13y15y24*y24                                                      | 2462.19 | 92.789  | 20100  | 3 | 821.40  | -1.98  |
| P06179 FLIC_SALTY Flagellin           | 6  |                   | SDLGAVQNR                     | 423 | 9  | 6  | 55.64  | b2y4y5y6y7y9                                                                   | 959.48  | 28.339  | 19377  | 2 | 480.25  | -6.42  |
| P06179 FLIC_SALTY Flagellin           | 7  |                   | IDAALAQVDTLR                  | 411 | 12 | 7  | 60.83  | b3b5b7y3y6y7y12                                                                | 1285.71 | 61.886  | 15279  | 2 | 643.36  | 0.00   |
| P06179 FLIC_SALTY Flagellin           | 8  |                   | QINSQTLGLDTLNVQQK             | 161 | 17 | 6  | 16.93  | b11*b11b17y8y10y17                                                             | 1900.03 | 66.077  | 14738  | 2 | 950.52  | 10.86  |
| P06179 FLIC_SALTY Flagellin           | 9  |                   | TEVVSIGGK                     | 370 | 9  | 4  | 39.1   | b3b7b8y9                                                                       | 889.50  | 34.376  | 13628  | 2 | 445.25  | -3.29  |
| P06179 FLIC_SALTY Flagellin           | 10 |                   | ELAVQSANSTNSQSDLSIQAEITQR     | 93  | 26 | 7  | 26.25  | b2b12b13*b13y3y9*y9                                                            | 2805.36 | 71.201  | 11891  | 3 | 935.79  | 5.22   |
| P06179 FLIC_SALTY Flagellin           | 11 |                   | INSAKDDAAGQAIANR              | 37  | 16 | 3  | 24.33  | b6y11y12                                                                       | 1614.82 | 31.656  | 6179   | 3 | 538.94  | -0.15  |
| P06179 FLIC_SALTY Flagellin           | 12 |                   | DDAAGQAIANR                   | 42  | 11 | 9  | 37.82  | b4b5b8*b8*b8y2y7*y7y11                                                         | 1101.53 | 28.738  | 5053   | 2 | 551.27  | 0.55   |
| P06179 FLIC_SALTY Flagellin           | 13 |                   | MAQVINTNSLSLLTQNNLNK          | 0   | 20 | 4  | 24.32  | b7b8*b8b11                                                                     | 2216.14 | 74.570  | 1822   | 2 | 1108.57 | -13.77 |
| P06179 FLIC_SALTY Flagellin           | 14 |                   | LNEIDR                        | 119 | 6  | 2  | 13.91  | y4*y4                                                                          | 759.41  | 97.365  | 16124  | 1 | 759.41  | 9.97   |
| P06179 FLIC_SALTY Flagellin           | 15 |                   | AQPDLAEEAAATTTENPLQK          | 392 | 19 | 5  | 22.45  | b4*b4b6b11*b11                                                                 | 1969.01 | 61.337  | 5778   | 2 | 985.01  | 9.92   |
| P06179 FLIC_SALTY Flagellin           | 16 |                   | NVQVANADLTEAK                 | 280 | 13 | 7  | 33.35  | b5*b5b6*b6b8y6*y6                                                              | 1372.69 | 14.711  | 2589   | 2 | 686.85  | -14.58 |
| P06179 FLIC_SALTY Flagellin           | 17 |                   | TYAASKAEGHNFK                 | 379 | 13 | 4  | 30.7   | b6b10y5y9                                                                      | 1423.68 | 41.626  | 38022  | 3 | 475.23  | -8.75  |

|                                     |    |                    |                                          |     |    |    |       |                                                                                            |         |         |        |   |         |        |
|-------------------------------------|----|--------------------|------------------------------------------|-----|----|----|-------|--------------------------------------------------------------------------------------------|---------|---------|--------|---|---------|--------|
| P06179 FLIC_SALTY Flagellin         | 18 |                    | SDLGAVQNRFNSAITNLGNTVNN<br>LTSAR         | 423 | 28 | 4  | 27.46 | y7y11y13y14                                                                                | 2947.52 | 93.415  | 19453  | 3 | 983.18  | 5.96   |
| P06179 FLIC_SALTY Flagellin         | 19 |                    | LGGADGKTEVVSIGGK                         | 363 | 16 | 4  | 24.33 | b7°b7b8y14                                                                                 | 1487.79 | 55.751  | 6871   | 3 | 496.60  | -12.80 |
| P06179 FLIC_SALTY Flagellin         | 20 |                    | IDAALAQVDTLRSDLGAVQNR                    | 411 | 21 | 3  | 14.38 | b4y6y10                                                                                    | 2226.16 | 75.608  | 5204   | 3 | 742.72  | -11.84 |
| P06179 FLIC_SALTY Flagellin         | 21 |                    | FNSAITNLGNTVNNLTSARSR                    | 432 | 21 | 4  | 22.51 | b4b6b10y14                                                                                 | 2250.17 | 112.782 | 5008   | 2 | 1125.59 | 6.08   |
| P06179 FLIC_SALTY Flagellin         | 22 |                    | YKVSDDTAATVTGYADTTIALDNS<br>TFK          | 178 | 26 | 3  | 12.5  | b5y8y11                                                                                    | 2753.35 | 102.078 | 3262   | 3 | 918.45  | -0.62  |
| P06179 FLIC_SALTY Flagellin         | 23 |                    | VSDTAATVTGYADTTIALDNSTF<br>KASATGLGGTDQK | 180 | 36 | 3  | 10.98 | b6b12y15                                                                                   | 3548.71 | 95.867  | 3087   | 3 | 1183.58 | -3.78  |
| P06179 FLIC_SALTY Flagellin         | 24 | Phosphoryl STY(6)  | QINSQTLGLDITLNVQKQ                       | 161 | 17 | 4  | 16.93 | b4*b4b12y12                                                                                | 1979.98 | 100.313 | 22208  | 3 | 660.66  | 3.14   |
| P06179 FLIC_SALTY Flagellin         | 25 | Phosphoryl STY(12) | TNGEVLTAGGATSPITGGPLPATA<br>TEDVK        | 252 | 28 | 9  | 41.62 | b4b9*b9b10b11°b11b15y7<br>°y7                                                              | 2708.29 | 124.731 | 15038  | 3 | 903.44  | -0.81  |
| P06179 FLIC_SALTY Flagellin         | 26 | Phosphoryl STY(5)  | TEVVSIGGK                                | 370 | 9  | 3  | 31.32 | b3b4y7                                                                                     | 969.46  | 29.907  | 7876   | 2 | 485.23  | 3.65   |
| P52616 FLJB_SALTY Phase 2 flagellin | 1  |                    | AQILQQAGTSVLAQANQVPQNV<br>SLLR           | 479 | 27 | 30 | 217.7 | b2*b2b3b4b5b6*b6b7*b7b<br>8*b8b11°b11b15°b15b17b<br>18y1y2y3y4y5y6y9y10y11<br>y12y13y14y27 | 2860.61 | 105.902 | 115601 | 3 | 954.21  | 1.88   |
| P52616 FLJB_SALTY Phase 2 flagellin | 2  |                    | SQSALGTAIER                              | 20  | 11 | 10 | 57.38 | b2*b2b5y4y6y7°y7y9°y9y1<br>l                                                               | 1132.59 | 42.641  | 52826  | 2 | 566.80  | -6.57  |
| P52616 FLJB_SALTY Phase 2 flagellin | 3  |                    | AQVINTNSLSLLTQNNLNK                      | 1   | 19 | 14 | 50.15 | b2*b2b3*b3b4y1y2y6*y6y<br>8*y8y13y15y19                                                    | 2085.14 | 75.502  | 42245  | 2 | 1043.08 | 6.91   |
| P52616 FLJB_SALTY Phase 2 flagellin | 4  |                    | TIEGGYALK                                | 328 | 9  | 7  | 54.39 | b5y1y2y3y6y8y9                                                                             | 951.51  | 44.195  | 36619  | 2 | 476.26  | -8.53  |
| P52616 FLJB_SALTY Phase 2 flagellin | 5  |                    | SDLGAVQNR                                | 434 | 9  | 6  | 55.64 | b2y4y5y6y7y9                                                                               | 959.48  | 28.339  | 19377  | 2 | 480.25  | -6.42  |
| P52616 FLJB_SALTY Phase 2 flagellin | 6  |                    | TAANLQGGVDGK                             | 369 | 12 | 6  | 23.03 | b3°b3y1y7y10y12                                                                            | 1130.58 | 35.960  | 16024  | 2 | 565.79  | -2.81  |
| P52616 FLJB_SALTY Phase 2 flagellin | 7  |                    | ELAVQSANSTNSQSDLDLSIAEIT<br>QR           | 93  | 26 | 7  | 26.25 | b2b12b13*b13y3y9*y9                                                                        | 2805.36 | 71.201  | 11891  | 3 | 935.79  | 5.22   |
| P52616 FLJB_SALTY Phase 2 flagellin | 8  |                    | INSAKDDAAGQAIANR                         | 37  | 16 | 3  | 24.33 | b6y11y12                                                                                   | 1614.82 | 31.656  | 6179   | 3 | 538.94  | -0.15  |
| P52616 FLJB_SALTY Phase 2 flagellin | 9  |                    | DDAAGQAIANR                              | 42  | 11 | 9  | 37.82 | b4b5b8°b8°b8y2y7*y7y11                                                                     | 1101.53 | 28.738  | 5053   | 2 | 551.27  | 0.55   |
| P52616 FLJB_SALTY Phase 2 flagellin | 10 |                    | AYANNGTTLDSGLDDAAIK                      | 189 | 20 | 4  | 14.9  | b2b3b8y14                                                                                  | 2009.00 | 75.468  | 4111   | 3 | 670.34  | 6.99   |
| P52616 FLJB_SALTY Phase 2 flagellin | 11 |                    | YFVTIGGFTGADAAK                          | 234 | 15 | 5  | 26.78 | b3b13y2y5y12                                                                               | 1517.75 | 83.044  | 3418   | 3 | 506.59  | -11.34 |
| P52616 FLJB_SALTY Phase 2 flagellin | 12 |                    | MAQVINTNSLSLLTQNNLNK                     | 0   | 20 | 4  | 24.32 | b7b8°b8b11                                                                                 | 2216.14 | 74.570  | 1822   | 2 | 1108.57 | -13.77 |
| P52616 FLJB_SALTY Phase 2 flagellin | 13 |                    | NANDGISIAQTTEGALNEINNQL<br>R             | 66  | 25 | 6  | 26.55 | b5b6y3y14°y14*y14                                                                          | 2670.35 | 87.308  | 33283  | 2 | 1335.68 | 15.18  |
| P52616 FLJB_SALTY Phase 2 flagellin | 14 |                    | TEVVTIDGK                                | 381 | 9  | 3  | 39.1  | y3y5y6                                                                                     | 961.51  | 52.999  | 31502  | 2 | 481.26  | -15.68 |
| P52616 FLJB_SALTY Phase 2 flagellin | 15 |                    | FNSAITNLGNTVNNLSEAR                      | 443 | 19 | 4  | 15.49 | b18y3°y3y10                                                                                | 2035.05 | 90.893  | 10425  | 2 | 1018.03 | 14.10  |
| P52616 FLJB_SALTY Phase 2 flagellin | 16 |                    | VSGQTQFNGVK                              | 125 | 11 | 6  | 51.62 | y3y4y9*y9y10*y10                                                                           | 1164.59 | 33.875  | 9775   | 2 | 582.80  | -6.18  |
| P52616 FLJB_SALTY Phase 2 flagellin | 17 |                    | AQPELAEAAAK                              | 403 | 11 | 4  | 25.08 | b3y8y10*y10                                                                                | 1098.56 | 88.151  | 5644   | 2 | 549.78  | -16.78 |
| P52616 FLJB_SALTY Phase 2 flagellin | 18 |                    | DTPAVVSADAK                              | 288 | 11 | 3  | 25.08 | b3b7y4                                                                                     | 1073.56 | 83.618  | 1979   | 1 | 1073.56 | 13.99  |
| P52616 FLJB_SALTY Phase 2 flagellin | 19 |                    | SRIEDSDYATEVSNMSR                        | 462 | 17 | 7  | 45.39 | b5b7b8y5y8*y8y13                                                                           | 1959.87 | 51.329  | 58697  | 3 | 653.96  | -2.62  |
| P52616 FLJB_SALTY Phase 2 flagellin | 20 |                    | TIEGGYALKAGDK                            | 328 | 13 | 3  | 28.84 | y3y7y8                                                                                     | 1322.69 | 37.958  | 17208  | 3 | 441.57  | -4.61  |
| P52616 FLJB_SALTY Phase 2 flagellin | 21 |                    | AQPELAEAAAKTTENPLQK                      | 403 | 19 | 6  | 43.7  | b4b6b7°b7b10b12                                                                            | 2010.03 | 101.565 | 8817   | 2 | 1005.52 | -11.78 |

|                                                               |    |                      |                                           |     |    |    |        |                                                                                                                |         |        |        |   |         |        |
|---------------------------------------------------------------|----|----------------------|-------------------------------------------|-----|----|----|--------|----------------------------------------------------------------------------------------------------------------|---------|--------|--------|---|---------|--------|
| P52616 FLJB_SALTY Phase 2 flagellin                           | 22 |                      | SDLGAVQNRFSAITNLGNTVNN<br>LSEAR           | 434 | 28 | 4  | 18.03  | y4y8*y8y26                                                                                                     | 2975.48 | 71.527 | 8643   | 4 | 744.62  | -5.91  |
| P52616 FLJB_SALTY Phase 2 flagellin                           | 23 |                      | NALIAGGVDATDANGAELVKMSY<br>TDK            | 299 | 26 | 9  | 27.5   | b3*b3b12°b12b14b16°b16<br>*b16y9                                                                               | 2624.27 | 74.652 | 8375   | 4 | 656.82  | -8.19  |
| P52616 FLJB_SALTY Phase 2 flagellin                           | 24 |                      | TEVVTDIGKTYNASK                           | 381 | 15 | 5  | 30.42  | b14y6*y6y8y13                                                                                                  | 1625.84 | 71.218 | 7390   | 2 | 813.42  | 1.28   |
| P52616 FLJB_SALTY Phase 2 flagellin                           | 25 |                      | QINSQTLGLDSLNVQKAYDVK                     | 161 | 21 | 6  | 40.73  | b3*b3b4b8b12b16                                                                                                | 2334.21 | 90.384 | 6914   | 3 | 778.74  | -6.80  |
| P52616 FLJB_SALTY Phase 2 flagellin                           | 26 |                      | TYNASKAAGHDFK                             | 390 | 13 | 5  | 35.11  | b6°b6b9b12y9                                                                                                   | 1409.67 | 60.822 | 5882   | 2 | 705.34  | -5.02  |
| P52616 FLJB_SALTY Phase 2 flagellin                           | 27 |                      | KDDAAGQAIANR                              | 41  | 12 | 2  | 7.26   | b4°b4                                                                                                          | 1229.61 | 31.618 | 5168   | 2 | 615.31  | -8.24  |
| P52616 FLJB_SALTY Phase 2 flagellin                           | 28 |                      | NGTTLDVSGLDAAIK                           | 193 | 16 | 4  | 21.69  | b3b11°b11b14                                                                                                   | 1589.82 | 75.525 | 1538   | 2 | 795.41  | 11.98  |
| P06202 OPPA_SALTY Periplasmic<br>oligopeptide-binding protein | 1  |                      | LADPNTASPYASYLQYGHIANIDD<br>IAGKKPATDLGVK | 125 | 38 | 34 | 179.03 | b2b3b4b5°b5°b5b6°b6°b6<br>b7°b7b8°b8°b8b11°b11b1<br>3b14°b14y1y3y4y8y11y12y<br>19y22y25y27y28y31y36y3<br>8*y38 | 4001.02 | 83.618 | 265721 | 5 | 801.01  | -12.33 |
| P06202 OPPA_SALTY Periplasmic<br>oligopeptide-binding protein | 2  |                      | AEQQLDKDSAIVPVYYYVNAR                     | 494 | 21 | 16 | 127.69 | b4b5b10°b10b11b12°b12y<br>3y4y5°y5y6y7y9y10y21                                                                 | 2442.23 | 73.695 | 134672 | 3 | 814.75  | -0.90  |
| P06202 OPPA_SALTY Periplasmic<br>oligopeptide-binding protein | 3  |                      | WSDGTPVTAHDFVYSWQR                        | 107 | 18 | 18 | 149    | b2°b2y1y3y4y5°y5y6y7y8y<br>9y10°y10y11y13y16y18*y1<br>8                                                        | 2151.98 | 72.787 | 128257 | 3 | 718.00  | -5.45  |
| P06202 OPPA_SALTY Periplasmic<br>oligopeptide-binding protein | 4  |                      | SGEIDMTYNNMIELFQK                         | 263 | 18 | 20 | 132.35 | b1b2b3b4b5b11b14b15y1y<br>2*y2y3y4y7y9y10y11y12*<br>y12y18                                                     | 2130.01 | 87.235 | 116527 | 2 | 1065.51 | 8.14   |
| P06202 OPPA_SALTY Periplasmic<br>oligopeptide-binding protein | 5  |                      | LVEPEWFK                                  | 352 | 8  | 9  | 64.03  | b2b3y3y4y5°y5y6°y6y8                                                                                           | 1047.54 | 71.616 | 108136 | 2 | 524.28  | -6.06  |
| P06202 OPPA_SALTY Periplasmic<br>oligopeptide-binding protein | 6  |                      | ALDDHTFEVTLSEPVYFYK                       | 163 | 20 | 16 | 117.58 | b6°b6b7b8b9b10°b10b11y<br>2y5y7y9°y9y10y11y20                                                                  | 2371.15 | 86.525 | 106228 | 3 | 791.06  | 0.51   |
| P06202 OPPA_SALTY Periplasmic<br>oligopeptide-binding protein | 7  | Carbamidomethyl+C(4) | AGWCADYNEPTSFLNTMLSDSSN<br>NTAHYK         | 439 | 29 | 11 | 66.12  | b4y2y4y11y12y13y15y22y<br>24y25y29                                                                             | 3294.43 | 90.700 | 90795  | 3 | 1098.82 | 6.60   |
| P06202 OPPA_SALTY Periplasmic<br>oligopeptide-binding protein | 8  |                      | TVINQVTYLPISSEVTDVNR                      | 241 | 20 | 23 | 152.67 | b8°b8°b8b9b10y2*y2y3y4<br>*y4y5y6*y6y7y8°y8*y8y11<br>*y11y12y14y15y20                                          | 2248.21 | 77.790 | 76266  | 2 | 1124.61 | 11.84  |
| P06202 OPPA_SALTY Periplasmic<br>oligopeptide-binding protein | 9  |                      | NQGDLPAYSYTPPYTDGAK                       | 333 | 19 | 10 | 51.85  | b4b11y3y8°y8y10y11°y11y<br>14y19                                                                               | 2057.96 | 59.954 | 74340  | 2 | 1029.49 | 8.66   |
| P06202 OPPA_SALTY Periplasmic<br>oligopeptide-binding protein | 10 |                      | NLGVNVNLENQEWK                            | 410 | 14 | 18 | 151.99 | b1b2b3b4b6°b6b7b11b12y<br>6y7°y7y8y10y11y12*y12y1<br>4                                                         | 1656.84 | 67.405 | 48263  | 2 | 828.93  | 5.60   |
| P06202 OPPA_SALTY Periplasmic<br>oligopeptide-binding protein | 11 |                      | HQGTFDVAR                                 | 430 | 9  | 8  | 76.69  | b6y3y4y5y7y8*y8y9                                                                                              | 1030.50 | 31.758 | 42974  | 2 | 515.75  | -4.74  |
| P06202 OPPA_SALTY Periplasmic<br>oligopeptide-binding protein | 12 |                      | LADPNTASPYASYLQYGHIANIDD<br>IAGK          | 125 | 29 | 6  | 11.81  | b9y1y2y10y25y29                                                                                                | 3091.56 | 88.946 | 27362  | 3 | 1031.19 | 6.40   |
| P06202 OPPA_SALTY Periplasmic<br>oligopeptide-binding protein | 13 |                      | LIADTLK                                   | 474 | 7  | 4  | 41.35  | y3y5y6y7                                                                                                       | 773.47  | 44.033 | 14209  | 2 | 387.24  | -13.49 |

|                                                            |    |                       |                               |     |    |    |        |                                                     |         |         |        |   |         |        |
|------------------------------------------------------------|----|-----------------------|-------------------------------|-----|----|----|--------|-----------------------------------------------------|---------|---------|--------|---|---------|--------|
| P06202 OPPA_SALTY Periplasmic oligopeptide-binding protein | 14 |                       | KPATDLGVK                     | 154 | 9  | 3  | 31.32  | b5y3y4                                              | 928.53  | 27.292  | 5195   | 2 | 464.77  | -13.67 |
| P06202 OPPA_SALTY Periplasmic oligopeptide-binding protein | 15 |                       | DIIVNK                        | 325 | 6  | 2  | 30.45  | y3y5                                                | 701.42  | 56.014  | 15261  | 1 | 701.42  | 6.18   |
| P06202 OPPA_SALTY Periplasmic oligopeptide-binding protein | 16 |                       | DLFEGLLISDVEGHPSPGVAEK        | 67  | 22 | 4  | 21.65  | b6y8y10y15                                          | 2309.16 | 89.765  | 12707  | 3 | 770.39  | -2.64  |
| P06202 OPPA_SALTY Periplasmic oligopeptide-binding protein | 17 |                       | WENK                          | 89  | 4  | 1  | 13.16  | y3                                                  | 576.27  | 33.250  | 3053   | 1 | 576.27  | -12.60 |
| P06202 OPPA_SALTY Periplasmic oligopeptide-binding protein | 18 |                       | NNGSEVQSLDPHK                 | 43  | 13 | 6  | 44.45  | b5b9b12y7y11°y11                                    | 1424.66 | 136.527 | 1879   | 1 | 1424.66 | -11.48 |
| P06202 OPPA_SALTY Periplasmic oligopeptide-binding protein | 19 |                       | TVINQVTYLPISSEVTDVNR          | 241 | 22 | 16 | 97.64  | b3y5*y5y11°y11*y11y13*y13y14y16y17y18y19y20°y20*y20 | 2567.34 | 77.621  | 151638 | 3 | 856.45  | -0.76  |
| P06202 OPPA_SALTY Periplasmic oligopeptide-binding protein | 20 |                       | NNGSEVQSLDPHKIEGVPESNVSR      | 43  | 24 | 9  | 62.51  | b10y3y5y7°y7y10y11y14y22                            | 2592.24 | 51.859  | 73614  | 4 | 648.81  | -11.40 |
| P06202 OPPA_SALTY Periplasmic oligopeptide-binding protein | 21 |                       | FGDKWTQPANIVTNGAYK            | 200 | 18 | 8  | 62.87  | b4b7°b7y6y7y9y10y11                                 | 2010.00 | 63.322  | 58588  | 3 | 670.67  | -3.28  |
| P06202 OPPA_SALTY Periplasmic oligopeptide-binding protein | 22 | Carbamidomethyl+C(13) | EIPNEVRVDPYLCTYYYEINNQK       | 284 | 23 | 13 | 114.97 | b3b5b7b9b15y6*y6y7y8y9y10y11y21                     | 2920.40 | 76.798  | 32436  | 3 | 974.14  | 6.77   |
| P06202 OPPA_SALTY Periplasmic oligopeptide-binding protein | 23 |                       | VKNQGDLPAYSYTPPYTDGAK         | 331 | 21 | 5  | 30.88  | b6b12y8y9y11                                        | 2285.11 | 55.732  | 20597  | 3 | 762.38  | 1.28   |
| P06202 OPPA_SALTY Periplasmic oligopeptide-binding protein | 24 |                       | NPQYWDNAKTVINQVTYLPISSEVTDVNR | 232 | 29 | 5  | 22.73  | b22y5y7°y7y8                                        | 3364.70 | 102.257 | 17884  | 3 | 1122.24 | 6.75   |
| P06202 OPPA_SALTY Periplasmic oligopeptide-binding protein | 25 |                       | NQGDLPAYSYTPPYTDGAKLVEPEWFK   | 333 | 27 | 4  | 12.24  | b4y5°y5y22                                          | 3086.51 | 85.173  | 17326  | 3 | 1029.51 | 10.99  |
| P06202 OPPA_SALTY Periplasmic oligopeptide-binding protein | 26 |                       | ENAKWSDGTPVTAHDFVYSWQR        | 103 | 22 | 9  | 81.96  | b11y5°y5y6y7y8y9y10y15                              | 2594.22 | 69.126  | 16833  | 3 | 865.41  | 4.42   |
| P06202 OPPA_SALTY Periplasmic oligopeptide-binding protein | 27 |                       | DPLDNIYVKNLYIIK               | 527 | 15 | 3  | 35.34  | b4b5b6                                              | 1821.01 | 129.380 | 9538   | 2 | 911.01  | -4.69  |
| P06202 OPPA_SALTY Periplasmic oligopeptide-binding protein | 28 |                       | YRSGEIDMTYNNMPIELFQK          | 261 | 20 | 3  | 21.69  | b4b7b9                                              | 2449.12 | 77.553  | 4659   | 3 | 817.04  | -14.55 |
| P06202 OPPA_SALTY Periplasmic oligopeptide-binding protein | 29 |                       | TFLDTRHQGTDFVAR               | 424 | 15 | 4  | 18.81  | b8*b8y3y6                                           | 1763.86 | 87.645  | 2024   | 3 | 588.62  | -14.39 |
| P06202 OPPA_SALTY Periplasmic oligopeptide-binding protein | 30 |                       | KNLGVNVNLENQEWK               | 409 | 15 | 3  | 26.89  | y3y4y7                                              | 1784.92 | 76.099  | 1905   | 3 | 595.64  | -5.13  |
| P06202 OPPA_SALTY Periplasmic oligopeptide-binding protein | 31 |                       | LSDSSNNTAHYK                  | 456 | 12 | 0  | 9.04   |                                                     | 1336.61 | 90.676  | 5848   | 2 | 668.81  | 0.82   |
| P06202 OPPA_SALTY Periplasmic oligopeptide-binding protein | 32 |                       | PVYYYYVNAR                    | 506 | 9  | 1  | 7.52   | b5                                                  | 1144.59 | 73.748  | 3001   | 2 | 572.80  | 10.56  |

|                                                            |    |                      |                                 |     |    |    |        |                                                                   |         |         |        |   |         |        |
|------------------------------------------------------------|----|----------------------|---------------------------------|-----|----|----|--------|-------------------------------------------------------------------|---------|---------|--------|---|---------|--------|
| P06202 OPPA_SALTY Periplasmic oligopeptide-binding protein | 33 |                      | TASPYASYLQYGHIANIDDIAGK         | 130 | 24 | 1  | 8.77   | b12                                                               | 2581.26 | 88.902  | 1653   | 4 | 646.07  | -12.48 |
| P0AA28 THIO_SALTY Thioredoxin-1                            | 1  |                      | LNIDQNPGTAPK                    | 58  | 12 | 25 | 175.57 | b2*b2b3b4*b4*b4b5b6*b6b7b10y2y5y6y7y8*y8*y8y9*y9y10*y10*y10y11y12 | 1267.65 | 39.190  | 105650 | 2 | 634.33  | -14.06 |
| P0AA28 THIO_SALTY Thioredoxin-1                            | 2  |                      | MIAPILDEIADEYQGK                | 37  | 16 | 16 | 140.2  | b2b3b4b8y2y4*y4y5y6y7y9y10y11y13y14y16                            | 1805.91 | 94.217  | 104663 | 2 | 903.46  | 7.64   |
| P0AA28 THIO_SALTY Thioredoxin-1                            | 3  |                      | GIPTLLLFK                       | 74  | 9  | 11 | 91.47  | b2b3b5y1y2y3y4y5y6y7y9                                            | 1001.63 | 91.054  | 89577  | 2 | 501.32  | -11.27 |
| P0AA28 THIO_SALTY Thioredoxin-1                            | 4  |                      | IIHLTDDSFDTDVLK                 | 4   | 15 | 4  | 18.81  | b3y6y12y15                                                        | 1731.89 | 72.098  | 3930   | 2 | 866.45  | 4.30   |
| P0AA28 THIO_SALTY Thioredoxin-1                            | 5  |                      | MIAPILDEIADEYQGKLTVAK           | 37  | 21 | 10 | 104.06 | b3y7y11y12y15y16y17y18y19y20                                      | 2318.22 | 95.250  | 124125 | 3 | 773.41  | -2.95  |
| P0AA28 THIO_SALTY Thioredoxin-1                            | 6  |                      | LNIDQNPGTAPKYGIR                | 58  | 16 | 4  | 17.8   | b4*b4b7y13                                                        | 1756.91 | 96.496  | 6160   | 2 | 878.96  | -13.55 |
| P0AA28 THIO_SALTY Thioredoxin-1                            | 7  |                      | GIPTLLLFK                       | 74  | 9  | 0  | 1.51   |                                                                   | 983.62  | 91.055  | 1772   | 2 | 492.32  | -0.31  |
| P67091 UF_SALTY Universal stress protein F                 | 1  |                      | TILVPIDISDSELTQR                | 3   | 16 | 23 | 170.08 | b2b3b4*b4y1y2*y2y3*y3y4y5y7y8*y8y9y10y11y12*y12*y12y13y14y16      | 1799.98 | 82.687  | 133796 | 2 | 900.50  | 5.22   |
| P67091 UF_SALTY Universal stress protein F                 | 2  | Carbamidomethyl+C(4) | HAECSVLVVR                      | 134 | 10 | 10 | 79.11  | b1b2b7y1y3y4y6y8y9y10                                             | 1169.60 | 41.791  | 64294  | 2 | 585.31  | -5.43  |
| P67091 UF_SALTY Universal stress protein F                 | 3  |                      | SQLEAIKK                        | 69  | 9  | 6  | 46.88  | b2y2y3y5y7y9                                                      | 1029.62 | 44.995  | 48306  | 2 | 515.32  | -7.35  |
| P67091 UF_SALTY Universal stress protein F                 | 4  |                      | VISHVEAEAK                      | 19  | 10 | 12 | 102.37 | b5b8y1y2y3*y3y4y5y6y7y8y10                                        | 1082.58 | 24.750  | 28010  | 2 | 541.79  | -4.06  |
| P67091 UF_SALTY Universal stress protein F                 | 5  |                      | VQAHVAEGSPK                     | 85  | 11 | 13 | 87     | b1b2b3b4*b4y2y4*y4y5y6y7y9y11                                     | 1122.58 | 19.171  | 7282   | 2 | 561.80  | -6.42  |
| P67091 UF_SALTY Universal stress protein F                 | 6  |                      | ILEMAK                          | 98  | 6  | 2  | 27.44  | b5y5                                                              | 704.39  | 38.734  | 10503  | 1 | 704.39  | -13.69 |
| P67091 UF_SALTY Universal stress protein F                 | 7  |                      | VHFLTVPISLPYYASLGLAYSaelPAMDDLK | 34  | 31 | 4  | 22.98  | y10*y10y11y13                                                     | 3394.78 | 126.620 | 2300   | 3 | 1132.26 | 3.88   |
| P67091 UF_SALTY Universal stress protein F                 | 8  |                      | VQAHVAEGSPKDK                   | 85  | 13 | 3  | 28.84  | b4b9b10                                                           | 1365.72 | 69.797  | 5379   | 2 | 683.36  | 7.15   |
| P67091 UF_SALTY Universal stress protein F                 | 9  | Oxidation+M(27)      | VHFLTVPISLPYYASLGLAYSaelPAMDDLK | 34  | 31 | 3  | 11.47  | b4b16y5                                                           | 3410.77 | 94.465  | 115400 | 4 | 853.45  | 3.08   |
| P67091 UF_SALTY Universal stress protein F                 | 10 |                      | ISHVEAEAK                       | 20  | 9  | 3  | 21.17  | b3*b3b7                                                           | 983.51  | 24.751  | 10715  | 2 | 492.26  | -3.35  |
| P67091 UF_SALTY Universal stress protein F                 | 11 |                      | SHVEAEAK                        | 21  | 8  | 4  | 34.7   | b3b4*b4b6                                                         | 870.42  | 24.764  | 7821   | 2 | 435.71  | -11.15 |
| P67091 UF_SALTY Universal stress protein F                 | 12 |                      | QAHVAEGSPK                      | 86  | 10 | 2  | 8.01   | b3*b3                                                             | 1023.52 | 19.178  | 1740   | 2 | 512.26  | -0.78  |
| P67091 UF_SALTY Universal stress protein F                 | 13 |                      | SQLEAIKK                        | 69  | 9  | 0  | 1.51   |                                                                   | 1012.59 | 45.014  | 2485   | 3 | 338.20  | -13.56 |
| P23905 DGAL_SALTY D-galactose-binding periplasmic protein  | 1  |                      | SSIPVFGVDALPEALALVK             | 250 | 19 | 20 | 154.41 | b4*b4b5b6*b6b7*b7b10y1y2y3y4y5y6y8y11y13y14y16y19                 | 1926.10 | 108.382 | 116318 | 2 | 963.56  | 5.32   |
| P23905 DGAL_SALTY D-galactose-binding periplasmic protein  | 2  |                      | SGAMAGTVLNDANNQAK               | 269 | 17 | 21 | 168.22 | b2b3b7b9*b9b11b17y1y4y5y6y7y8y9*y9y10y11y12*y12y13y17             | 1661.79 | 46.903  | 89046  | 2 | 831.40  | 0.81   |
| P23905 DGAL_SALTY D-galactose-binding periplasmic protein  | 3  |                      | ALAINLVDPAAGTVIEK               | 84  | 18 | 9  | 43.51  | b2b3b5*b5b6y6y11y14y18                                            | 1766.02 | 81.205  | 73182  | 2 | 883.51  | 5.81   |

|                                                           |    |                      |                                      |     |    |    |        |                                                                   |         |         |        |   |         |        |
|-----------------------------------------------------------|----|----------------------|--------------------------------------|-----|----|----|--------|-------------------------------------------------------------------|---------|---------|--------|---|---------|--------|
| P23905 DGAL_SALTY D-galactose-binding periplasmic protein | 4  |                      | VPYVGVDKDNLSEFTQK                    | 315 | 17 | 12 | 111.55 | b11y3y6y8*y8y9y11°y11y13y14y16y17                                 | 1938.98 | 62.176  | 45108  | 3 | 647.00  | -1.39  |
| P23905 DGAL_SALTY D-galactose-binding periplasmic protein | 5  |                      | YDDNFMSVVR                           | 34  | 10 | 7  | 53.01  | b2y2y4°y4y5y6y7                                                   | 1245.57 | 67.078  | 19040  | 2 | 623.29  | 7.84   |
| P23905 DGAL_SALTY D-galactose-binding periplasmic protein | 6  |                      | HWQANQGWDLNK                         | 148 | 12 | 5  | 33.25  | b4b7y6°y6y11                                                      | 1496.72 | 62.687  | 3112   | 3 | 499.58  | 12.89  |
| P23905 DGAL_SALTY D-galactose-binding periplasmic protein | 7  |                      | AYYVGTDSK                            | 127 | 9  | 7  | 61.39  | b5b6y4y5°y5y7°y7                                                  | 1003.48 | 69.772  | 10107  | 2 | 502.24  | 7.91   |
| P23905 DGAL_SALTY D-galactose-binding periplasmic protein | 8  |                      | VLTL SAVMASLLFGAHAHAADTR             | 4   | 23 | 3  | 13.49  | b17y5y13                                                          | 2352.29 | 86.469  | 1549   | 3 | 784.77  | 18.27  |
| P23905 DGAL_SALTY D-galactose-binding periplasmic protein | 9  |                      | SAPDVQLLMNDSQNDQSKQNDQIDVLLAK        | 52  | 29 | 7  | 41.1   | b3°b3y3y4y5y25y27                                                 | 3227.61 | 78.756  | 40080  | 3 | 1076.54 | 6.73   |
| P23905 DGAL_SALTY D-galactose-binding periplasmic protein | 10 |                      | IGVTIYKYDDNFMSVVR                    | 27  | 17 | 3  | 16.93  | b12y5y7                                                           | 2020.02 | 78.238  | 13596  | 3 | 674.01  | -1.45  |
| P23905 DGAL_SALTY D-galactose-binding periplasmic protein | 11 |                      | AIEKD GK                             | 45  | 7  | 3  | 41.35  | b3b4b5                                                            | 760.43  | 72.332  | 11024  | 1 | 760.43  | 13.24  |
| P23905 DGAL_SALTY D-galactose-binding periplasmic protein | 12 |                      | ALDSYDKAYYVGTD SK                    | 120 | 16 | 11 | 80.69  | b10y3°y3y4°y4y5y6°y6y7°y7y8                                       | 1795.82 | 48.721  | 7742   | 3 | 599.28  | -8.16  |
| P23905 DGAL_SALTY D-galactose-binding periplasmic protein | 13 |                      | SSIPVFGVDALPEALALVKSGAMAGTVLNDANNQAK | 250 | 36 | 5  | 10.98  | b9y11°y11y14*y14                                                  | 3568.83 | 74.548  | 7241   | 4 | 892.96  | -9.51  |
| P23905 DGAL_SALTY D-galactose-binding periplasmic protein | 14 |                      | MDAWLSGPNANKIEVVIANNDAMAMGAVEALK     | 214 | 32 | 4  | 11.34  | b13y6y11°y11                                                      | 3343.70 | 92.657  | 6211   | 3 | 1115.24 | 14.60  |
| P23905 DGAL_SALTY D-galactose-binding periplasmic protein | 15 |                      | ELNDKGIQTEQLALDTAMWDTAQAK            | 187 | 25 | 8  | 43.65  | b5b8b10b12*b12y7y8y13                                             | 2790.36 | 100.205 | 2937   | 4 | 698.35  | 0.87   |
| P23905 DGAL_SALTY D-galactose-binding periplasmic protein | 16 |                      | KALDSYDK                             | 119 | 8  | 4  | 33.95  | b6b7y7°y7                                                         | 939.46  | 35.891  | 2918   | 2 | 470.24  | -14.62 |
| P23905 DGAL_SALTY D-galactose-binding periplasmic protein | 17 |                      | IQYVLLKGEPGHPDAEAR                   | 163 | 18 | 5  | 39.49  | y8°y8y9y10y12                                                     | 1993.03 | 51.337  | 1983   | 3 | 665.02  | -7.90  |
| P23905 DGAL_SALTY D-galactose-binding periplasmic protein | 18 |                      | ESGVIQGDLIAKHWQANQGWDLNK             | 136 | 24 | 3  | 13.12  | b4b13y7                                                           | 2707.33 | 101.631 | 1839   | 3 | 903.12  | -9.83  |
| P23905 DGAL_SALTY D-galactose-binding periplasmic protein | 19 | Oxidation+M()        | IEVVIANNDAMAMGAVEALK                 | 226 | 20 | 7  | 40.35  | b3y10°y10y11y12y15°y15                                            | 2075.06 | 67.146  | 24870  | 3 | 692.36  | 4.24   |
| P65702 PGK_SALTY Phohoglycerate kinase                    | 1  |                      | VLPAVAMLEER                          | 373 | 11 | 15 | 102.75 | b1b2b3y2°y2y3°y3y4y5y6y7y8°y8y9y11                                | 1227.67 | 80.693  | 166594 | 2 | 614.34  | -2.19  |
| P65702 PGK_SALTY Phohoglycerate kinase                    | 2  |                      | SVNDVKEDEQILDIGDASAQQLAEILK          | 272 | 27 | 25 | 177.61 | b2b4b5°b5b8b9b11b12b13b14*b14b18b24b25b26y1y2y3y4y5y7y10y13y15y27 | 2941.50 | 100.530 | 152008 | 3 | 981.17  | 0.91   |
| P65702 PGK_SALTY Phohoglycerate kinase                    | 3  | Carbamidomethyl+C(6) | FADVACAGPLLAELDALGK                  | 156 | 20 | 15 | 122.9  | b2b3b8y2y3y5°y5y6y8y9y10y12y13y14y15                              | 2002.04 | 99.608  | 127765 | 2 | 1001.52 | 3.35   |

|                                                                        |    |                      |                                     |     |    |    |        |                                                               |         |         |        |   |         |        |
|------------------------------------------------------------------------|----|----------------------|-------------------------------------|-----|----|----|--------|---------------------------------------------------------------|---------|---------|--------|---|---------|--------|
| P65702 PGK_SALTY Phohoglycerate kinase                                 | 4  |                      | TILWNGPVGVFEPNFR                    | 302 | 17 | 16 | 123.85 | b3b12b13*b13y4*y4y5y6*y6y7y11y12y13*y13y14y17                 | 1993.05 | 106.895 | 111028 | 2 | 997.03  | 7.10   |
| P65702 PGK_SALTY Phohoglycerate kinase                                 | 5  |                      | VATEFSETAPATLK                      | 258 | 14 | 15 | 112.64 | b1b2b4*b4b14y3y5*y5y6y7y9y10y11y12y14                         | 1464.76 | 53.239  | 96387  | 2 | 732.88  | -0.50  |
| P65702 PGK_SALTY Phohoglycerate kinase                                 | 6  | Carbamidomethyl+C(5) | LLTTCDIPVPTDVR                      | 244 | 14 | 16 | 110.16 | b2b5b6*b6b7*b7b9*b9y2y5y7y8y10y11y12y14                       | 1599.85 | 69.377  | 87392  | 2 | 800.43  | 4.43   |
| P65702 PGK_SALTY Phohoglycerate kinase                                 | 7  |                      | ADLNVPVKEGK                         | 19  | 11 | 13 | 100.53 | b2b4*b4b9y2y3*y3y4y5y6y7y8y11                                 | 1169.65 | 37.361  | 84644  | 2 | 585.33  | -2.50  |
| P65702 PGK_SALTY Phohoglycerate kinase                                 | 8  |                      | VMVTSHLGRPTEGEYNEEFSLLPV VNYLK      | 53  | 29 | 14 | 76.85  | b1b2b5b6b14*b14b17b18b21b22y4y5y7y29                          | 3321.66 | 92.647  | 82841  | 4 | 831.17  | -6.32  |
| P65702 PGK_SALTY Phohoglycerate kinase                                 | 9  |                      | LVKDYLDGVDV AEGEL VVLENV R          | 90  | 23 | 16 | 74.63  | b1b2b7b8b10b14*b14y1y2y3y4*y4y5y6y12y23                       | 2544.36 | 97.393  | 54481  | 3 | 848.79  | 1.15   |
| P65702 PGK_SALTY Phohoglycerate kinase                                 | 10 |                      | ASLPTIELALK                         | 38  | 11 | 6  | 51.62  | y1y3y4y6y8y11                                                 | 1155.69 | 77.846  | 51400  | 2 | 578.35  | -4.33  |
| P65702 PGK_SALTY Phohoglycerate kinase                                 | 11 |                      | MTDLDLAGKR                          | 5   | 10 | 9  | 83.09  | b2y1y3y4y5y6y7y9y10                                           | 1119.58 | 43.101  | 50027  | 2 | 560.29  | -4.69  |
| P65702 PGK_SALTY Phohoglycerate kinase                                 | 12 |                      | TILWNGPVGVFEPNFRK                   | 302 | 18 | 5  | 33.47  | y5y10y15y16y18                                                | 2121.12 | 97.209  | 41552  | 3 | 707.71  | -5.06  |
| P65702 PGK_SALTY Phohoglycerate kinase                                 | 13 | Carbamidomethyl+C(5) | YAALCDVFVMDAFGTAHR                  | 128 | 18 | 5  | 25.72  | b2b3y4y11y13                                                  | 2043.93 | 90.559  | 25744  | 3 | 681.98  | -4.66  |
| P65702 PGK_SALTY Phohoglycerate kinase                                 | 14 |                      | VMVTSHLGRPTEGEYNEEFSLLPV VNYLKDK    | 53  | 31 | 9  | 26.68  | b1b6b7b12*b12b14*b14y1y31                                     | 3564.81 | 96.481  | 19960  | 4 | 891.96  | 0.48   |
| P65702 PGK_SALTY Phohoglycerate kinase                                 | 15 |                      | ISYISTGGGAFLEFVEGK                  | 355 | 18 | 3  | 16.16  | b10y6y12                                                      | 1874.96 | 75.990  | 12250  | 3 | 625.66  | 5.86   |
| P65702 PGK_SALTY Phohoglycerate kinase                                 | 16 |                      | IADQLIVGGGIANTFVAAQGHSVG K          | 206 | 25 | 3  | 12.8   | b5y4y14                                                       | 2423.30 | 78.749  | 38933  | 3 | 808.44  | -1.21  |
| P65702 PGK_SALTY Phohoglycerate kinase                                 | 17 |                      | EPARPMVAIVGGSK                      | 179 | 14 | 3  | 19.98  | b5b7y9                                                        | 1411.77 | 56.879  | 24250  | 3 | 471.26  | -0.26  |
| P65702 PGK_SALTY Phohoglycerate kinase                                 | 18 |                      | LSNPVR                              | 84  | 6  | 4  | 40.98  | b3*b3b4b5                                                     | 685.40  | 22.984  | 19178  | 2 | 343.20  | -4.36  |
| P65702 PGK_SALTY Phohoglycerate kinase                                 | 19 |                      | EDEQILDIGDASAQQLAEILK               | 278 | 21 | 5  | 19.74  | b10b12y12y15*y15                                              | 2299.19 | 62.085  | 7569   | 4 | 575.55  | 8.71   |
| P65702 PGK_SALTY Phohoglycerate kinase                                 | 20 |                      | DYLDGVDV AEGEL VVLENVR              | 93  | 20 | 3  | 14.9   | b7y7y13                                                       | 2204.12 | 116.093 | 5260   | 3 | 735.38  | 5.21   |
| P65702 PGK_SALTY Phohoglycerate kinase                                 | 21 |                      | GTEIVANAIDSEAFSIAGGGDTLA AIDLFGIADK | 320 | 35 | 4  | 21.88  | b3b4b14y11                                                    | 3393.71 | 110.956 | 2432   | 3 | 1131.91 | 2.23   |
| P65702 PGK_SALTY Phohoglycerate kinase                                 | 22 |                      | MTDLDLAGK                           | 5   | 9  | 3  | 31.32  | b6b8y5                                                        | 963.49  | 25.256  | 1603   | 2 | 482.25  | 4.69   |
| P65702 PGK_SALTY Phohoglycerate kinase                                 | 23 | Carbamidomethyl+C(5) | LLTTCDIPVPTDVRVATEFSETAP ATLK       | 244 | 28 | 3  | 12.01  | b9b11y9                                                       | 3045.57 | 85.150  | 4691   | 3 | 1015.86 | -2.89  |
| P65702 PGK_SALTY Phohoglycerate kinase                                 | 24 |                      | TDLDLAGKR                           | 6   | 9  | 1  | 8.43   | b4                                                            | 988.54  | 43.093  | 22106  | 2 | 494.77  | -7.16  |
| P65702 PGK_SALTY Phohoglycerate kinase                                 | 25 |                      | LNVPVKEGK                           | 21  | 9  | 0  | 2.26   |                                                               | 983.58  | 37.373  | 13519  | 2 | 492.29  | -8.13  |
| P65702 PGK_SALTY Phohoglycerate kinase                                 | 26 |                      | DLNVPVKEGK                          | 20  | 10 | 1  | 8.01   | b3                                                            | 1098.60 | 37.370  | 12416  | 2 | 549.80  | -12.00 |
| P65702 PGK_SALTY Phohoglycerate kinase                                 | 27 |                      | PAVAMLEER                           | 375 | 9  | 3  | 36.84  | b3b5b7                                                        | 1015.52 | 80.691  | 7242   | 2 | 508.26  | -3.25  |
| P0A283 PTGA_SALTY Glucose-ecific phohotransferase enzyme IIA component | 1  |                      | STLTPVVISNMDEIKELIK                 | 133 | 19 | 23 | 162.75 | b1b2*b2b3*b3b4*b4b14b19*b19y3y4*y4y5y6y8y11y12y13y15y16y17y19 | 2130.16 | 93.031  | 354741 | 3 | 710.73  | -5.16  |
| P0A283 PTGA_SALTY Glucose-ecific phohotransferase enzyme IIA component | 2  |                      | MVAPVDGTIGK                         | 59  | 11 | 15 | 117.08 | b1b2b3b4y1y2y3y5*y5y6y7y8y9y10y11                             | 1087.57 | 46.894  | 144889 | 2 | 544.29  | -10.78 |



|                                                                        |    |                   |                                |     |    |    |        |                                                                                      |         |         |        |   |         |        |
|------------------------------------------------------------------------|----|-------------------|--------------------------------|-----|----|----|--------|--------------------------------------------------------------------------------------|---------|---------|--------|---|---------|--------|
| P0A283 PTGA_SALTY Glucose-ecific phohotransferase enzyme IIA component | 3  |                   | VGDPVIEFDLPLEEK                | 115 | 16 | 17 | 144.52 | b4b5°b5b6b7b8°b8b10b13y3°y3y4y6y9y10y11y16                                           | 1812.97 | 100.241 | 94121  | 2 | 906.99  | 4.85   |
| P0A283 PTGA_SALTY Glucose-ecific phohotransferase enzyme IIA component | 4  |                   | LSGSVTVGETPVIR                 | 152 | 14 | 9  | 67.92  | b3b7°b7b11y4y7y8y9y14                                                                | 1414.79 | 56.286  | 44997  | 2 | 707.90  | -2.50  |
| P0A283 PTGA_SALTY Glucose-ecific phohotransferase enzyme IIA component | 5  |                   | STLTPVVISNMDEIK                | 133 | 15 | 3  | 18.81  | b6b13y11                                                                             | 1646.88 | 73.831  | 9136   | 2 | 823.94  | 7.78   |
| P0A283 PTGA_SALTY Glucose-ecific phohotransferase enzyme IIA component | 6  |                   | DTGTIEIVAPLSGEIVNIEDVPDVVFAEK  | 16  | 29 | 3  | 11.81  | b5b12y4                                                                              | 3069.65 | 87.819  | 2216   | 3 | 1023.89 | 19.09  |
| P0A283 PTGA_SALTY Glucose-ecific phohotransferase enzyme IIA component | 7  |                   | VKVGDVPVIEFDLPLEEK             | 113 | 18 | 15 | 157.35 | b3b6b7b8b11y3°y3y4y5y6y7y8y9y10y13                                                   | 2040.12 | 95.610  | 123061 | 3 | 680.71  | -5.39  |
| P0A283 PTGA_SALTY Glucose-ecific phohotransferase enzyme IIA component | 8  |                   | VGDPVIEFDLPLEEKAK              | 115 | 18 | 4  | 35.81  | y3y5y12y15                                                                           | 2012.07 | 92.153  | 17239  | 3 | 671.36  | -11.04 |
| P0A283 PTGA_SALTY Glucose-ecific phohotransferase enzyme IIA component | 9  | Phosphoryl STY(9) | IFETNHAFSIESDSGIELFVHFGIDTVELK | 70  | 30 | 3  | 17.54  | b3b8b10_H3PO4 b10                                                                    | 3474.66 | 118.698 | 1979   | 4 | 869.42  | 6.68   |
| P0A1S0 IHFA_SALTY Integration host factor subunit alpha                | 1  |                   | TGEDIPITAR                     | 66  | 10 | 16 | 132.45 | b2b3°b3b4°b4b5y3y4y5°y5y6y7y8°y8y9y10                                                | 1072.55 | 43.599  | 56607  | 2 | 536.78  | -8.31  |
| P0A1S0 IHFA_SALTY Integration host factor subunit alpha                | 2  |                   | LSGFGNFDLRDK                   | 45  | 12 | 6  | 33.25  | b5b7y2y5°y5y8                                                                        | 1368.69 | 51.786  | 24123  | 3 | 456.90  | -3.75  |
| P0A1S0 IHFA_SALTY Integration host factor subunit alpha                | 3  |                   | NQRPGR                         | 57  | 6  | 2  | 30.45  | b3b5                                                                                 | 727.40  | 50.309  | 4307   | 2 | 364.20  | 0.50   |
| P0A1S0 IHFA_SALTY Integration host factor subunit alpha                | 4  |                   | LSGFGNFDLR                     | 45  | 10 | 7  | 53.01  | y5°y5y6°y6y7y9*y9                                                                    | 1125.59 | 50.583  | 3680   | 3 | 375.87  | 18.33  |
| P0A1S0 IHFA_SALTY Integration host factor subunit alpha                | 5  |                   | ALENGEQVKLSGFGNFDLR            | 36  | 19 | 5  | 23.27  | b7°b7y3y4*y4                                                                         | 2094.04 | 95.254  | 1676   | 3 | 698.69  | -8.86  |
| Q7CQ05 GRCA_SALTY Autonomous glycyI radical cofactor                   | 1  |                   | MITGIQITK                      | 0   | 9  | 7  | 31.32  | b2b6y1y2y6y7y9                                                                       | 1004.57 | 55.602  | 121215 | 2 | 502.79  | -12.21 |
| Q7CQ05 GRCA_SALTY Autonomous glycyI radical cofactor                   | 2  |                   | SGFAEDEVVAVSK                  | 35  | 13 | 14 | 120.57 | b3°b3b4b9y2°y2y4y5y6y8y9y10y11y13                                                    | 1337.66 | 55.146  | 82265  | 2 | 669.33  | -0.73  |
| Q7CQ05 GRCA_SALTY Autonomous glycyI radical cofactor                   | 3  |                   | LGEIEYR                        | 48  | 7  | 8  | 51.88  | b2b6y2y3°y3y4y6y7                                                                    | 879.45  | 42.619  | 75103  | 2 | 440.23  | -11.73 |
| Q7CQ05 GRCA_SALTY Autonomous glycyI radical cofactor                   | 4  |                   | FNSLTPEQQRDVIAR                | 106 | 15 | 11 | 30.42  | b2*b2b3°b3y1y2y4y5y10*y10y15                                                         | 1773.90 | 48.047  | 55808  | 3 | 591.97  | -12.94 |
| Q7CQ05 GRCA_SALTY Autonomous glycyI radical cofactor                   | 5  |                   | FNSLTPEQQR                     | 106 | 10 | 13 | 89.63  | b2*b2b9y1y3y4°y4y5*y5y6y7y8y10                                                       | 1219.60 | 38.560  | 41037  | 2 | 610.30  | -6.61  |
| Q7CQ05 GRCA_SALTY Autonomous glycyI radical cofactor                   | 6  |                   | EIPMEVKPEVR                    | 55  | 11 | 7  | 66.92  | y2y4y6y7y8y9y11                                                                      | 1326.71 | 48.986  | 40471  | 2 | 663.86  | 2.39   |
| Q7CQ05 GRCA_SALTY Autonomous glycyI radical cofactor                   | 7  |                   | VEGGQHNLNVNVL                  | 66  | 13 | 11 | 90.49  | b4b6b7°b7y4*y4y5y6*y6y7y8                                                            | 1434.76 | 50.550  | 48655  | 3 | 478.92  | -18.21 |
| Q7CQ05 GRCA_SALTY Autonomous glycyI radical cofactor                   | 8  |                   | AANDDLLNSFWLLDSEK              | 9   | 17 | 4  | 23.92  | b7y10y11°y11                                                                         | 1950.94 | 103.349 | 4287   | 2 | 975.97  | -4.63  |
| Q7CQ05 GRCA_SALTY Autonomous glycyI radical cofactor                   | 9  |                   | AANDDLLNSFWLLDSEKGEAR          | 9   | 21 | 31 | 268.97 | b3b4*b4b5°b5°b5b6°b6*b6b7°b7°b7b10b12b14y3y4y5y7y8y9y10y11°y11y13y14°y14y15y16y18y19 | 2364.14 | 93.100  | 195694 | 3 | 788.72  | -2.69  |
| Q7CQ05 GRCA_SALTY Autonomous glycyI radical cofactor                   | 10 |                   | VSGYAVRFNSLTPEQQR              | 99  | 17 | 5  | 40.08  | b3°b3b4b5b14                                                                         | 1951.97 | 82.498  | 4592   | 2 | 976.49  | -12.57 |
| Q7CQ05 GRCA_SALTY Autonomous glycyI radical cofactor                   | 11 |                   | ETLEDAVKHPEK                   | 80  | 12 | 7  | 48.55  | b7b9b11°b11y9°y9y11                                                                  | 1395.72 | 97.353  | 2856   | 2 | 698.36  | 4.64   |
| Q7CQ05 GRCA_SALTY Autonomous glycyI radical cofactor                   | 12 |                   | SGFAEDEVVAVSKLGEIEYR           | 35  | 20 | 3  | 14.9   | b12b14y5                                                                             | 2198.10 | 116.976 | 2225   | 3 | 733.37  | -0.22  |

|                                                     |    |                      |                                   |     |    |    |        |                                                                      |         |         |        |   |         |        |
|-----------------------------------------------------|----|----------------------|-----------------------------------|-----|----|----|--------|----------------------------------------------------------------------|---------|---------|--------|---|---------|--------|
| Q7CQ05 GRCA_SALTY Autonomous glycy radical cofactor | 13 | Carbamidomethyl+C(1) | CIVAKSGFAEDEVVAVSK                | 30  | 18 | 4  | 16.16  | b6°b6b10y10                                                          | 1908.95 | 65.332  | 1659   | 3 | 636.99  | -10.30 |
| Q7CQ05 GRCA_SALTY Autonomous glycy radical cofactor | 14 |                      | PMEVKPEVR                         | 57  | 9  | 2  | 19.33  | b3b7                                                                 | 1084.57 | 48.995  | 37928  | 2 | 542.79  | -7.20  |
| Q7CQ05 GRCA_SALTY Autonomous glycy radical cofactor | 15 |                      | TGIQITK                           | 2   | 7  | 3  | 23.8   | b4*b4b6                                                              | 760.45  | 55.587  | 6306   | 1 | 760.45  | -7.79  |
| Q7CQ05 GRCA_SALTY Autonomous glycy radical cofactor | 16 |                      | EIPMEVKPEVR                       | 55  | 11 | 0  | 2.26   |                                                                      | 1308.68 | 48.984  | 10326  | 3 | 436.90  | -11.29 |
| P0A1E3 CYSK_SALTY Cysteine synthase A               | 1  |                      | YLSTALFADLFTEKELQQ                | 305 | 18 | 25 | 169.11 | b2b4°b4b5b12b13b15b16y2*y2y5y6*y6y7°y7*y7y8y9*y9y10*y10y11y12°y12y18 | 2117.09 | 102.831 | 88660  | 2 | 1059.05 | 5.42   |
| P0A1E3 CYSK_SALTY Cysteine synthase A               | 2  |                      | GVLKPGVELVEPTSGNTGIALAYVAAAR      | 56  | 28 | 11 | 88.33  | y3y4y5y6y7y9y14y16y17y28*y28                                         | 2753.53 | 81.889  | 77734  | 3 | 918.51  | 2.93   |
| P0A1E3 CYSK_SALTY Cysteine synthase A               | 3  |                      | IQGIGAGFIPGNLDLK                  | 226 | 16 | 12 | 46.56  | b1b2*b2b3b8y1y2y7y8y10y12y16                                         | 1612.91 | 84.021  | 68833  | 2 | 806.96  | 3.41   |
| P0A1E3 CYSK_SALTY Cysteine synthase A               | 4  |                      | LTLTMPETMSIER                     | 87  | 13 | 14 | 79.45  | b2y1y2°y2y4°y4y6y8°y8y9°y9y10y11y13                                  | 1521.78 | 74.704  | 56908  | 2 | 761.39  | 7.70   |
| P0A1E3 CYSK_SALTY Cysteine synthase A               | 5  |                      | YLLLQQFSNPANPEIHEK                | 137 | 18 | 19 | 130.36 | b1b2b3b9b15y3°y3y4y6y7°y7y9*y9y10°y10y11y13y17y18                    | 2141.09 | 74.669  | 55172  | 3 | 714.37  | -3.99  |
| P0A1E3 CYSK_SALTY Cysteine synthase A               | 6  |                      | NIVVILPSSGER                      | 293 | 12 | 11 | 99.15  | b2b3b4b5y6y7y8°y8y9y10y12                                            | 1283.73 | 64.720  | 24984  | 2 | 642.37  | -0.67  |
| P0A1E3 CYSK_SALTY Cysteine synthase A               | 7  |                      | ALGANLVLTEGAK                     | 105 | 13 | 9  | 97.75  | b2y3y5y6y7y8y9y11y13                                                 | 1256.72 | 61.889  | 18686  | 2 | 628.86  | -3.01  |
| P0A1E3 CYSK_SALTY Cysteine synthase A               | 8  |                      | VVGITNEEAISTAR                    | 246 | 14 | 4  | 28.55  | b1y7y9y12                                                            | 1459.76 | 50.282  | 16669  | 2 | 730.38  | -10.03 |
| P0A1E3 CYSK_SALTY Cysteine synthase A               | 9  |                      | IGANMIWDAEK                       | 44  | 11 | 9  | 28.09  | b1b2b4y2y8y9°y9y11*y11                                               | 1247.62 | 62.606  | 8565   | 2 | 624.32  | 12.23  |
| P0A1E3 CYSK_SALTY Cysteine synthase A               | 10 |                      | YLSTALFADLFTEK                    | 305 | 14 | 4  | 25.42  | b5y9y10y14                                                           | 1618.84 | 103.753 | 7224   | 2 | 809.92  | 3.09   |
| P0A1E3 CYSK_SALTY Cysteine synthase A               | 11 |                      | VVGITNEEAISTARR                   | 246 | 15 | 5  | 24.83  | b10y9y10°y10y15                                                      | 1615.87 | 55.690  | 3725   | 3 | 539.29  | -4.23  |
| P0A1E3 CYSK_SALTY Cysteine synthase A               | 12 |                      | IGNGR                             | 22  | 5  | 2  | 27.07  | b4y4                                                                 | 516.28  | 37.185  | 49445  | 1 | 516.28  | -14.54 |
| P0A1E3 CYSK_SALTY Cysteine synthase A               | 13 |                      | TTGPEIWEDTDGQVDVFISGVGTGGTLTGVT   | 155 | 32 | 3  | 11.34  | b7b9y16                                                              | 3265.52 | 94.488  | 14418  | 3 | 1089.18 | -19.89 |
| P0A1E3 CYSK_SALTY Cysteine synthase A               | 14 |                      | IYEDNSLTIGHTPLVR                  | 3   | 16 | 5  | 36.03  | b4b8b9*b9b12                                                         | 1827.95 | 91.858  | 1967   | 2 | 914.48  | -7.48  |
| P0A1E3 CYSK_SALTY Cysteine synthase A               | 15 |                      | GKTDLITVAVEPTDSPVIAQALAGEEIKPGPHK | 193 | 33 | 7  | 39.05  | b4b5°b5y5y10y11y22                                                   | 3381.80 | 80.119  | 67605  | 4 | 846.20  | -9.24  |
| P0A1E3 CYSK_SALTY Cysteine synthase A               | 16 |                      | LIDKVVGITNEEAISTAR                | 242 | 18 | 7  | 47.94  | b6y4y8y10y12y13*y13                                                  | 1929.06 | 60.143  | 47868  | 3 | 643.69  | -3.48  |
| P0A1E3 CYSK_SALTY Cysteine synthase A               | 17 |                      | AEEIVASDPQKYLLLQQFSNPANPEIHEK     | 126 | 29 | 7  | 30.2   | b3b13°b13y3y6y9y10                                                   | 3308.66 | 77.706  | 27320  | 4 | 827.92  | -5.46  |
| P0A1E3 CYSK_SALTY Cysteine synthase A               | 18 |                      | LMEEEGILAGISSGAAVAALKLQEDESFTNK   | 261 | 32 | 5  | 36.11  | b9b10b11b13y13                                                       | 3292.66 | 74.697  | 23566  | 4 | 823.92  | 0.22   |
| P0A1E3 CYSK_SALTY Cysteine synthase A               | 19 |                      | LQEDESFTNKNIVVILPSSGER            | 283 | 22 | 3  | 13.91  | b4b10y6                                                              | 2475.24 | 86.727  | 4768   | 3 | 825.75  | -12.33 |
| P0A1E3 CYSK_SALTY Cysteine synthase A               | 20 | Phosphoryl STY(5)    | VVGITNEEAISTARR                   | 246 | 15 | 3  | 26.89  | b3b5b10                                                              | 1695.83 | 53.203  | 16894  | 3 | 565.95  | 0.50   |
| P0A1E3 CYSK_SALTY Cysteine synthase A               | 21 |                      | LLLQQFSNPANPEIHEK                 | 138 | 17 | 0  | 4.9    |                                                                      | 1978.02 | 74.669  | 9494   | 2 | 989.51  | -10.43 |
| P00924 ENO1_YEAST Enolase 1                         | 1  |                      | NVNDVIAPAFVK                      | 67  | 12 | 16 | 157.26 | b2b4b5°b5b6b7b9y3y5y6y7y8y9y10*y10y12                                | 1286.71 | 66.818  | 101489 | 2 | 643.86  | -1.99  |
| P00924 ENO1_YEAST Enolase 1                         | 2  |                      | VNQIGTLSESIK                      | 346 | 12 | 12 | 102.46 | b2*b2b3y3y5y6y7y8°y8y9y10y12                                         | 1288.71 | 55.096  | 91688  | 2 | 644.86  | 0.00   |

|                                                                 |    |                       |                                       |     |    |    |        |                                                                   |         |         |        |   |         |        |
|-----------------------------------------------------------------|----|-----------------------|---------------------------------------|-----|----|----|--------|-------------------------------------------------------------------|---------|---------|--------|---|---------|--------|
| P00924 ENO1_YEAST Enolase 1                                     | 3  |                       | SIVPSGASTGVHEALEMR                    | 32  | 18 | 15 | 131.84 | b2b14°b14y2y4y6°y6y7y8y9y10y11y13y15y16                           | 1840.90 | 61.868  | 67627  | 3 | 614.31  | -10.15 |
| P00924 ENO1_YEAST Enolase 1                                     | 4  |                       | TAGIQIVADDLTVTNPK                     | 312 | 17 | 9  | 81.21  | b15y3y4y6y10y11y12y13y17                                          | 1755.96 | 73.176  | 39255  | 2 | 878.48  | 6.60   |
| P00924 ENO1_YEAST Enolase 1                                     | 5  |                       | IEEELGDNAVFAGENFHHGDK                 | 415 | 21 | 8  | 39.72  | b3y1y9y10°y10y11y19y21                                            | 2328.03 | 58.201  | 32231  | 4 | 582.76  | -9.23  |
| P00924 ENO1_YEAST Enolase 1                                     | 6  |                       | AVDDFLISLDGTANK                       | 88  | 15 | 6  | 44.41  | b5b6y5y6y12y15                                                    | 1578.81 | 82.842  | 28631  | 2 | 789.91  | 6.73   |
| P00924 ENO1_YEAST Enolase 1                                     | 7  |                       | WLTGPQLADLYHSLMK                      | 272 | 16 | 9  | 36.04  | b6°b6b11°b11°b11y1y6y12y14                                        | 1872.95 | 96.489  | 22692  | 3 | 624.99  | -10.23 |
| P00924 ENO1_YEAST Enolase 1                                     | 8  |                       | SIVPSGASTGVHEALEMRDGDK                | 32  | 22 | 4  | 21.65  | b8y6y10y14                                                        | 2256.10 | 76.827  | 2154   | 2 | 1128.55 | 4.00   |
| P00924 ENO1_YEAST Enolase 1                                     | 9  |                       | WLTGPQLADLYHSLMKR                     | 272 | 17 | 3  | 24.33  | b4b10b12                                                          | 2029.07 | 84.979  | 1841   | 2 | 1015.04 | -1.02  |
| P00924 ENO1_YEAST Enolase 1                                     | 10 |                       | AADALLK                               | 338 | 8  | 9  | 109.4  | b4b6°b6b7y3y4y5y6y7                                               | 814.49  | 54.246  | 85121  | 2 | 407.75  | -20.98 |
| P00924 ENO1_YEAST Enolase 1                                     | 11 |                       | YDLDFK                                | 258 | 6  | 2  | 30.45  | y3y5                                                              | 800.37  | 55.422  | 58517  | 2 | 400.69  | -13.12 |
| P00924 ENO1_YEAST Enolase 1                                     | 12 |                       | TFAEALR                               | 178 | 7  | 6  | 65.41  | b4°b4y3y4y5y6                                                     | 807.42  | 46.045  | 57957  | 2 | 404.21  | -16.63 |
| P00924 ENO1_YEAST Enolase 1                                     | 13 |                       | HLADLSK                               | 132 | 7  | 3  | 38.34  | b5y4y5                                                            | 783.42  | 26.341  | 47811  | 2 | 392.21  | -17.22 |
| P00924 ENO1_YEAST Enolase 1                                     | 14 |                       | NVPLYK                                | 126 | 6  | 1  | 13.91  | y4                                                                | 733.42  | 37.390  | 19670  | 1 | 733.42  | -9.57  |
| P00924 ENO1_YEAST Enolase 1                                     | 15 |                       | IATAIEK                               | 330 | 7  | 5  | 41.35  | y3y5°y5y6°y6                                                      | 745.43  | 28.983  | 15423  | 2 | 373.22  | -16.54 |
| P00924 ENO1_YEAST Enolase 1                                     | 16 |                       | AAQDSFAAGWGMVSHR                      | 358 | 17 | 3  | 16.93  | b4y6y11                                                           | 1789.85 | 61.762  | 6224   | 2 | 895.43  | 1.71   |
| P00924 ENO1_YEAST Enolase 1                                     | 17 | Carbamidomethyl+C(5)  | IGLDCASSEFFK                          | 243 | 12 | 4  | 33.25  | b9b11y6y11                                                        | 1373.65 | 136.486 | 2756   | 1 | 1373.65 | 3.91   |
| P00924 ENO1_YEAST Enolase 1                                     | 18 |                       | SVYDSR                                | 9   | 6  | 2  | 13.91  | y3°y3                                                             | 726.35  | 71.991  | 1512   | 1 | 726.35  | 10.76  |
| P00924 ENO1_YEAST Enolase 1                                     | 19 |                       | AVDDFLISLDGTANKSK                     | 88  | 17 | 5  | 23.85  | b5b10y10°y10y15                                                   | 1793.91 | 65.868  | 147390 | 2 | 897.46  | -10.00 |
| P00924 ENO1_YEAST Enolase 1                                     | 20 |                       | IEEELGDNAVFAGENFHHGDKL                | 415 | 22 | 6  | 39.17  | b3y5y10y11y12°y12                                                 | 2441.11 | 64.508  | 48372  | 4 | 611.03  | -12.00 |
| P00924 ENO1_YEAST Enolase 1                                     | 21 |                       | AAQDSFAAGWGMVSHRSGETE<br>DTFIADLVVGLR | 358 | 34 | 6  | 22.22  | b7b9b14°b14b29y14                                                 | 3592.72 | 105.221 | 5492   | 4 | 898.94  | -7.75  |
| P00924 ENO1_YEAST Enolase 1                                     | 22 |                       | SVYDSRGNPTVEVELTTEK                   | 9   | 19 | 3  | 22.45  | b4b7b10                                                           | 2124.05 | 69.335  | 5288   | 2 | 1062.53 | 4.14   |
| P00924 ENO1_YEAST Enolase 1                                     | 23 |                       | VYARSVYDSR                            | 5   | 10 | 3  | 37.71  | y4y5y6                                                            | 1215.61 | 70.209  | 5014   | 2 | 608.31  | 1.00   |
| P00924 ENO1_YEAST Enolase 1                                     | 24 |                       | GVFRSIVPSGASTGVHEALEMR                | 28  | 22 | 3  | 13.91  | b3y4y7                                                            | 2300.19 | 102.255 | 1584   | 3 | 767.40  | 1.59   |
| P00924 ENO1_YEAST Enolase 1                                     | 25 | Phosphoryl STY(4)     | GNPTVEVELTTEK                         | 15  | 13 | 4  | 21.36  | b3b5y11°y11                                                       | 1496.67 | 50.036  | 15796  | 2 | 748.84  | -7.10  |
| P00924 ENO1_YEAST Enolase 1                                     | 26 | Oxidation+M(17)       | SIVPSGASTGVHEALEMRDGDK                | 32  | 22 | 5  | 22.66  | b8b9°b9y8°y8                                                      | 2272.08 | 47.385  | 85521  | 4 | 568.78  | -2.15  |
| P00924 ENO1_YEAST Enolase 1                                     | 27 | Oxidation+M(15)       | WLTGPQLADLYHSLMK                      | 272 | 16 | 4  | 17.8   | b11y10y13°y13                                                     | 1888.95 | 87.695  | 6094   | 3 | 630.32  | -7.56  |
| P00924 ENO1_YEAST Enolase 1                                     | 28 |                       | GTLSESIK                              | 350 | 8  | 0  | 2.64   |                                                                   | 834.46  | 55.080  | 2313   | 2 | 417.73  | 4.17   |
| Q9ZF60 GLTI_SALTY Glutamate/aartate periplasmic-binding protein | 1  |                       | VVGYSQDYSNAIVEAVKK                    | 61  | 18 | 15 | 97.85  | b1b2b3b5b7y1y2y3y4y5y7y12y14y16y18                                | 1970.01 | 64.001  | 169494 | 3 | 657.34  | -8.12  |
| Q9ZF60 GLTI_SALTY Glutamate/aartate periplasmic-binding protein | 2  |                       | VVGYSQDYSNAIVEAVK                     | 61  | 17 | 24 | 174.98 | b1b2b3b6°b6b8b9b10°b10b11b16°b16y1y3y4y5y9y11y12°y12y13°y13y15y17 | 1841.94 | 68.493  | 140115 | 2 | 921.47  | 6.23   |
| Q9ZF60 GLTI_SALTY Glutamate/aartate periplasmic-binding protein | 3  |                       | ESSVPFSYYDNQQK                        | 47  | 14 | 11 | 76.67  | b2°b2b3°b3b11y6y7y8y9y10y14                                       | 1691.76 | 56.277  | 135820 | 2 | 846.38  | 3.10   |
| Q9ZF60 GLTI_SALTY Glutamate/aartate periplasmic-binding protein | 4  |                       | AVAFMMDDALLAGER                       | 198 | 15 | 17 | 207.3  | b3b4b5b6b11b12y3y4y5y7y8y10y11y12y13y14y15                        | 1609.78 | 85.068  | 126559 | 2 | 805.39  | 5.84   |
| Q9ZF60 GLTI_SALTY Glutamate/aartate periplasmic-binding protein | 5  |                       | NGVIVVGHR                             | 38  | 9  | 12 | 91.47  | b2°b2b3°b3b4y2y3y4y5y6y7y9                                        | 950.54  | 32.807  | 104941 | 2 | 475.77  | -13.61 |
| Q9ZF60 GLTI_SALTY Glutamate/aartate periplasmic-binding protein | 6  | Carbamidomethyl+C(19) | KPDNWEIVGKPSQEAYGCMLRK                | 217 | 23 | 12 | 44.16  | b1b5°b5b6b8b10°b10b16y5y11°y11y23                                 | 2734.32 | 56.885  | 100336 | 4 | 684.33  | -10.36 |
| Q9ZF60 GLTI_SALTY Glutamate/aartate periplasmic-binding protein | 7  |                       | LIPITSQNR                             | 89  | 9  | 5  | 39.1   | y5y6°y6y7y9                                                       | 1041.59 | 43.536  | 43675  | 2 | 521.30  | -10.31 |

|                                                                 |    |                                          |                                 |     |    |    |       |                                    |         |        |        |   |         |        |
|-----------------------------------------------------------------|----|------------------------------------------|---------------------------------|-----|----|----|-------|------------------------------------|---------|--------|--------|---|---------|--------|
| Q9ZF60 GLTI_SALTY Glutamate/aartate periplasmic-binding protein | 8  |                                          | QAAFSDTIFVVGTR                  | 122 | 14 | 6  | 34.02 | b3b8y1y11y12y14                    | 1511.79 | 77.435 | 38921  | 2 | 756.40  | 3.96   |
| Q9ZF60 GLTI_SALTY Glutamate/aartate periplasmic-binding protein | 9  |                                          | NGVIVVGHRESSVPFSYYDNQQK         | 38  | 23 | 5  | 20.88 | b13y3y6y10y23                      | 2623.30 | 58.182 | 23167  | 3 | 875.11  | 5.40   |
| Q9ZF60 GLTI_SALTY Glutamate/aartate periplasmic-binding protein | 10 | Carbamidomethyl+C(13)                    | IPLLQNGTFDFECGSTTNLER           | 98  | 22 | 9  | 55.35 | b3b11y1y2y9y10y11y12y22            | 2526.23 | 82.362 | 22035  | 2 | 1263.62 | 12.95  |
| Q9ZF60 GLTI_SALTY Glutamate/aartate periplasmic-binding protein | 11 | Carbamidomethyl+C(19)                    | KPDNWEIVGKPQSQEAYGCMLR          | 217 | 22 | 11 | 56.89 | b6b7*b7b10*b10y4y5y7y10y12y22      | 2606.26 | 62.135 | 11702  | 3 | 869.42  | 3.00   |
| Q9ZF60 GLTI_SALTY Glutamate/aartate periplasmic-binding protein | 12 | Carbamidomethyl+C(21)                    | AKKPDNWEIVGKPQSQEAYGCMLR        | 215 | 24 | 4  | 24.16 | b7y4y5y12                          | 2805.40 | 58.163 | 11495  | 3 | 935.81  | 7.57   |
| Q9ZF60 GLTI_SALTY Glutamate/aartate periplasmic-binding protein | 13 |                                          | LTTAMLVMGLSAGLAHAEDGAP AAGSTLDK | 5   | 30 | 4  | 17.09 | b13y11y13y22                       | 2869.44 | 68.055 | 6001   | 3 | 957.15  | -0.77  |
| Q9ZF60 GLTI_SALTY Glutamate/aartate periplasmic-binding protein | 14 | Carbamidomethyl+C(22)                    | LIPITSQNRIPLLQNGTFDFECGSTTNLER  | 89  | 31 | 13 | 76.44 | b3b10y4*y4y6y7*y7y9y10y11y14y21y29 | 3548.81 | 87.447 | 242850 | 3 | 1183.61 | 7.15   |
| Q9ZF60 GLTI_SALTY Glutamate/aartate periplasmic-binding protein | 15 |                                          | QKQAAFSDTIFVVGTR                | 120 | 16 | 5  | 45.74 | b8b13y3y4y5                        | 1767.93 | 69.892 | 40801  | 3 | 589.98  | -7.32  |
| Q9ZF60 GLTI_SALTY Glutamate/aartate periplasmic-binding protein | 16 |                                          | ESSVPFSYYDNQKVVGYSDYS NAIVEAVK  | 47  | 31 | 3  | 11.47 | b8y13y27                           | 3514.70 | 80.714 | 29320  | 3 | 1172.24 | 10.56  |
| Q9ZF60 GLTI_SALTY Glutamate/aartate periplasmic-binding protein | 17 |                                          | ALFKAPNDK                       | 290 | 9  | 4  | 46.61 | b6y3y4y5                           | 1003.55 | 38.826 | 26348  | 2 | 502.28  | -11.62 |
| Q9ZF60 GLTI_SALTY Glutamate/aartate periplasmic-binding protein | 18 |                                          | DHGDSFRTLESGR                   | 185 | 13 | 3  | 21.36 | b10y3y12                           | 1476.66 | 42.482 | 3159   | 2 | 738.84  | -13.23 |
| Q9ZF60 GLTI_SALTY Glutamate/aartate periplasmic-binding protein | 19 |                                          | IISAKDHGDSFR                    | 180 | 12 | 4  | 23.03 | b9y3*y3y11                         | 1345.68 | 69.791 | 2287   | 2 | 673.34  | -5.71  |
| Q9ZF60 GLTI_SALTY Glutamate/aartate periplasmic-binding protein | 20 | Carbamidomethyl+C(13);Phosphoryl STY(16) | IPLLQNGTFDFECGSTTNLER           | 98  | 22 | 3  | 23.78 | b11b14b15                          | 2606.17 | 87.340 | 44094  | 3 | 869.40  | 8.34   |
| Q9ZF60 GLTI_SALTY Glutamate/aartate periplasmic-binding protein | 21 | Carbamidomethyl+C(19);Phosphoryl STY(13) | KPDNWEIVGKPQSQEAYGCMLRK         | 217 | 23 | 4  | 22.52 | b9*b9y9y10                         | 2814.34 | 88.065 | 2604   | 3 | 938.78  | 13.62  |
| Q9ZF60 GLTI_SALTY Glutamate/aartate periplasmic-binding protein | 22 | Oxidation+M(5)                           | LTTAMLVMGLSAGLAHAEDGAP AAGSTLDK | 5   | 30 | 3  | 17.54 | y3y15y23                           | 2885.46 | 88.264 | 44358  | 4 | 722.12  | 6.26   |
| Q9ZF60 GLTI_SALTY Glutamate/aartate periplasmic-binding protein | 23 | Oxidation+M(2)                           | LMDDTIAQAQTSGEAEK               | 247 | 17 | 4  | 27.07 | b3b6b8y13                          | 1823.85 | 81.391 | 8406   | 3 | 608.62  | 9.17   |
| Q9ZF60 GLTI_SALTY Glutamate/aartate periplasmic-binding protein | 24 |                                          | PITSQNR                         | 91  | 7  | 1  | 9.02  | b6                                 | 815.43  | 43.537 | 10312  | 2 | 408.22  | -14.00 |
| Q9ZF60 GLTI_SALTY Glutamate/aartate periplasmic-binding protein | 25 | Carbamidomethyl+C(12)                    | VGKPQSQEAYGCMLRK                | 224 | 16 | 0  | 6.78  |                                    | 1851.90 | 56.880 | 3909   | 3 | 617.97  | -8.70  |
| Q9ZF60 GLTI_SALTY Glutamate/aartate periplasmic-binding protein | 26 | Carbamidomethyl+C(13)                    | IVGKPQSQEAYGCMLRK               | 223 | 17 | 0  | 6.78  |                                    | 1964.98 | 56.886 | 3373   | 3 | 655.66  | -13.36 |

|                                                                 |    |                       |                                   |     |    |    |        |                                                             |         |         |        |   |         |        |
|-----------------------------------------------------------------|----|-----------------------|-----------------------------------|-----|----|----|--------|-------------------------------------------------------------|---------|---------|--------|---|---------|--------|
| Q9ZF60 GLTI_SALTY Glutamate/aartate periplasmic-binding protein | 27 |                       | NGVIVVGHR                         | 38  | 9  | 0  | 1.51   |                                                             | 933.52  | 32.776  | 3066   | 2 | 467.26  | -4.97  |
| Q8ZKQ1 LSRB_SALTY Autoinducer 2-binding protein lsrB            | 1  |                       | NNLAIVGFSTPNVMPYVQR               | 237 | 20 | 17 | 102.83 | b2*b2b3*b3b4*b4b5*b5y3y5y12*y12y14y15y16y17y20              | 2276.19 | 78.561  | 132121 | 3 | 759.40  | -4.18  |
| Q8ZKQ1 LSRB_SALTY Autoinducer 2-binding protein lsrB            | 2  |                       | AYPDLDAIIAPDANALPAAAQAAE NLKR     | 209 | 28 | 20 | 154.32 | b2b6b7b8b9b10b15y1y3y5y6y9y10y12y13*y13y18y19y20y28         | 2863.50 | 88.258  | 87761  | 3 | 955.17  | 0.09   |
| Q8ZKQ1 LSRB_SALTY Autoinducer 2-binding protein lsrB            | 3  |                       | ISVYVANALLK                       | 273 | 11 | 7  | 69.93  | y2y3y6y7y8y10y11                                            | 1190.71 | 74.259  | 77918  | 2 | 595.86  | -2.36  |
| Q8ZKQ1 LSRB_SALTY Autoinducer 2-binding protein lsrB            | 4  |                       | ISQEHPGWEIVTTQFGYNDATK            | 177 | 22 | 10 | 68.35  | b9b10*b10b11y3y5y7y8y12y22                                  | 2521.20 | 73.443  | 77391  | 3 | 841.07  | -0.10  |
| Q8ZKQ1 LSRB_SALTY Autoinducer 2-binding protein lsrB            | 5  |                       | LVGVGFFTSGGNGAQEAGK               | 35  | 19 | 11 | 49.64  | b3b6b17y1y2y3y5*y5y14y15y19                                 | 1795.91 | 72.385  | 63824  | 2 | 898.46  | 4.35   |
| Q8ZKQ1 LSRB_SALTY Autoinducer 2-binding protein lsrB            | 6  |                       | VAFFYSSPTVTDQNQWVK                | 154 | 18 | 12 | 97.19  | b5b10b12b13y8y10*y10y11y12y13y14y18                         | 2117.05 | 78.340  | 62110  | 2 | 1059.03 | 9.34   |
| Q8ZKQ1 LSRB_SALTY Autoinducer 2-binding protein lsrB            | 7  |                       | SLQTAEGIIK                        | 199 | 10 | 4  | 27.71  | b8y4y7y10                                                   | 1059.60 | 51.719  | 57708  | 2 | 530.30  | -8.06  |
| Q8ZKQ1 LSRB_SALTY Autoinducer 2-binding protein lsrB            | 8  |                       | NMPMNVGDSLDPGIGK                  | 284 | 17 | 10 | 54.45  | b2b6b10b12y2y5y11y14y15y17                                  | 1757.87 | 80.330  | 47959  | 2 | 879.44  | 5.62   |
| Q8ZKQ1 LSRB_SALTY Autoinducer 2-binding protein lsrB            | 9  |                       | GTVKEFGLWDVVQQGK                  | 257 | 16 | 11 | 78.1   | b5*b5b8y3*y3y5y6y7y10y13y16                                 | 1790.92 | 76.721  | 47469  | 3 | 597.65  | -11.93 |
| Q8ZKQ1 LSRB_SALTY Autoinducer 2-binding protein lsrB            | 10 |                       | SYIINQGTPK                        | 124 | 10 | 8  | 77.07  | b2b3b4y3y5y6y8y10                                           | 1170.57 | 38.941  | 45932  | 2 | 585.79  | -3.75  |
| Q8ZKQ1 LSRB_SALTY Autoinducer 2-binding protein lsrB            | 11 |                       | VTVSPNSEQGYHYEAK                  | 301 | 16 | 12 | 84.22  | b8y1y2y4y5y7*y7y9y10y11y12y16                               | 1808.82 | 37.014  | 43847  | 3 | 603.61  | -13.83 |
| Q8ZKQ1 LSRB_SALTY Autoinducer 2-binding protein lsrB            | 12 |                       | GNGIVLLPER                        | 317 | 10 | 8  | 37.71  | b2*b2y2*y2y4y5y6y10                                         | 1067.62 | 62.120  | 26361  | 2 | 534.31  | -3.77  |
| Q8ZKQ1 LSRB_SALTY Autoinducer 2-binding protein lsrB            | 13 |                       | EFGLWDVVQQGK                      | 261 | 12 | 8  | 37.23  | b3b10*b10y1y7y8*y8y12                                       | 1405.71 | 83.119  | 25731  | 2 | 703.36  | 0.00   |
| Q8ZKQ1 LSRB_SALTY Autoinducer 2-binding protein lsrB            | 14 |                       | QLGSMLEVMAAHQVDK                  | 134 | 16 | 3  | 17.8   | b5b12y4                                                     | 1756.89 | 57.440  | 7152   | 2 | 878.95  | 9.03   |
| Q8ZKQ1 LSRB_SALTY Autoinducer 2-binding protein lsrB            | 15 |                       | VAFFYSSPTVTDQNQWVKEAK             | 154 | 21 | 6  | 32.32  | b1b5b6b10b13y13                                             | 2445.20 | 85.287  | 2325   | 3 | 815.74  | -2.50  |
| Q8ZKQ1 LSRB_SALTY Autoinducer 2-binding protein lsrB            | 16 | Carbamidomethyl+C(12) | ILTWDSDTKPECR                     | 111 | 13 | 15 | 165.94 | b5b7b9*b9y3y4*y4y5y6y7y8y9y10y11y12                         | 1620.74 | 50.775  | 94133  | 3 | 540.92  | -16.87 |
| Q8ZKQ1 LSRB_SALTY Autoinducer 2-binding protein lsrB            | 17 |                       | IAFIPK                            | 29  | 6  | 3  | 40.98  | b3y4y5                                                      | 688.43  | 54.506  | 19839  | 1 | 688.43  | -14.98 |
| Q8ZKQ1 LSRB_SALTY Autoinducer 2-binding protein lsrB            | 18 |                       | VIFNK                             | 327 | 5  | 1  | 13.53  | b3                                                          | 620.37  | 70.436  | 9983   | 1 | 620.37  | -10.53 |
| Q8ZKQ1 LSRB_SALTY Autoinducer 2-binding protein lsrB            | 19 |                       | AYPDLDAIIAPDANALPAAAQAAE NLK      | 209 | 27 | 6  | 22.17  | b5*b5b11y6y8y14                                             | 2707.35 | 95.404  | 1953   | 4 | 677.59  | -17.13 |
| Q8ZKQ1 LSRB_SALTY Autoinducer 2-binding protein lsrB            | 20 |                       | NMPMNVGDSLDPGIGKVTVSPN SEQGYHYEAK | 284 | 33 | 6  | 22.08  | b13*b13*b13y3y6y7                                           | 3547.71 | 80.233  | 19601  | 4 | 887.68  | 6.19   |
| Q8ZKQ1 LSRB_SALTY Autoinducer 2-binding protein lsrB            | 21 |                       | AKISQEHPGWEIVTTQFGYNDAT K         | 175 | 24 | 4  | 13.12  | b6b11y12*y12                                                | 2720.31 | 112.789 | 5496   | 3 | 907.44  | -6.82  |
| Q8ZKQ1 LSRB_SALTY Autoinducer 2-binding protein lsrB            | 22 |                       | QLGSMLEVMAAHQVDKEK                | 134 | 18 | 10 | 51.37  | b7*b7b8*b8b11*b11b12y4y12*y12                               | 2014.03 | 105.907 | 1852   | 2 | 1007.52 | 12.30  |
| Q8ZKQ1 LSRB_SALTY Autoinducer 2-binding protein lsrB            | 23 |                       | GNGIVLLPER                        | 317 | 10 | 0  | 1.88   |                                                             | 1049.59 | 62.091  | 2219   | 2 | 525.30  | -12.21 |
| P0A7W4 RS5_SALTY 30S ribosomal protein S5                       | 1  |                       | AYGSTNPINVVR                      | 126 | 12 | 17 | 130.99 | b1b2b3b4b5y1y2y3y4*y4y5y6y7y8y10*y10y12                     | 1290.67 | 51.764  | 138399 | 2 | 645.84  | -4.26  |
| P0A7W4 RS5_SALTY 30S ribosomal protein S5                       | 2  |                       | VFMQPASEGTHIAGGAMR                | 93  | 19 | 21 | 191.48 | b2b3b4b12*b12b13b14y4y5y6y7y11y12y13*y13y14y15y16*y16y17y19 | 1892.95 | 68.737  | 102781 | 2 | 946.98  | 5.48   |

|                                             |    |                 |                                  |     |    |    |        |                                                                              |         |         |        |   |         |        |
|---------------------------------------------|----|-----------------|----------------------------------|-----|----|----|--------|------------------------------------------------------------------------------|---------|---------|--------|---|---------|--------|
| P0A7W4 RS5_SALTY 30S ribosomal protein S5   | 3  |                 | SVEEILGK                         | 159 | 8  | 5  | 41.73  | y2y3y4y6y8                                                                   | 874.48  | 50.785  | 64090  | 2 | 437.74  | -13.05 |
| P0A7W4 RS5_SALTY 30S ribosomal protein S5   | 4  |                 | ATIDGLENMNSPEMVA AK              | 138 | 18 | 8  | 44.89  | b15y3y4y11y12*y12*y12y18                                                     | 1890.91 | 64.094  | 52616  | 2 | 945.96  | 10.59  |
| P0A7W4 RS5_SALTY 30S ribosomal protein S5   | 5  |                 | ATIDGLENMNSPEMVA AKR             | 138 | 19 | 17 | 121.89 | b2*b2b5y1y3y4y5y8y10*y10y11*y11y12*y12y13y16y17                              | 2046.98 | 59.784  | 50494  | 3 | 683.00  | -5.78  |
| P0A7W4 RS5_SALTY 30S ribosomal protein S5   | 6  |                 | IFSFTALT TVVG DGN GR             | 29  | 16 | 5  | 26.17  | y2y6y7y14*y14                                                                | 1653.86 | 87.049  | 21364  | 2 | 827.44  | 2.36   |
| P0A7W4 RS5_SALTY 30S ribosomal protein S5   | 7  |                 | AREVPAAIQK                       | 52  | 10 | 8  | 91.85  | b3b4b6b7b9y4y6y10                                                            | 1082.63 | 28.989  | 8780   | 2 | 541.82  | -6.20  |
| P0A7W4 RS5_SALTY 30S ribosomal protein S5   | 8  |                 | NMINVALNNGTLQHPVK                | 69  | 17 | 3  | 25.58  | b10b12b13                                                                    | 1862.97 | 83.397  | 1558   | 2 | 931.99  | -10.75 |
| P0A7W4 RS5_SALTY 30S ribosomal protein S5   | 9  |                 | AVLEVAGVHNVLAK                   | 112 | 14 | 11 | 140.8  | b3b4b5y4y5y6y8y9y10y11y12                                                    | 1419.81 | 60.940  | 100681 | 3 | 473.94  | -18.14 |
| P0A7W4 RS5_SALTY 30S ribosomal protein S5   | 10 |                 | LIAVNR                           | 14  | 6  | 1  | 13.91  | y5                                                                           | 685.43  | 33.169  | 7133   | 1 | 685.43  | -8.99  |
| P0A7W4 RS5_SALTY 30S ribosomal protein S5   | 11 |                 | QAGELQEK                         | 6   | 8  | 6  | 52.26  | b3b7y6*y6y7*y7                                                               | 902.45  | 97.429  | 4357   | 1 | 902.45  | -5.28  |
| P0A7W4 RS5_SALTY 30S ribosomal protein S5   | 12 |                 | IFSFTALT TVVG DGN GRVGF GYGK     | 29  | 23 | 4  | 13.49  | b6y3y12*y12                                                                  | 2362.24 | 73.344  | 268783 | 4 | 591.31  | 6.82   |
| P0A7W4 RS5_SALTY 30S ribosomal protein S5   | 13 |                 | RNMINVALNNGTLQHPVK               | 68  | 18 | 3  | 35.08  | b3b4b5                                                                       | 2019.08 | 56.716  | 14122  | 3 | 673.70  | -3.75  |
| P0A7W4 RS5_SALTY 30S ribosomal protein S5   | 14 |                 | NMINVALNNGTLQHPVKG VHTG SR       | 69  | 24 | 3  | 13.12  | b3y5y15                                                                      | 2557.32 | 81.403  | 4087   | 3 | 853.11  | -10.21 |
| P0A7W4 RS5_SALTY 30S ribosomal protein S5   | 15 |                 | AYGSTNPIN VVRATIDGLENMNSPEMVA AK | 126 | 30 | 6  | 24.46  | b3b6b8b10*b10y10                                                             | 3162.55 | 78.979  | 3412   | 3 | 1054.86 | -1.24  |
| P0A7W4 RS5_SALTY 30S ribosomal protein S5   | 16 |                 | GVHTGSRVFMQPA SEG TGIIAGGA MR    | 86  | 26 | 3  | 12.5   | b10y4y8                                                                      | 2587.27 | 113.604 | 2047   | 3 | 863.09  | -8.40  |
| P0A7W4 RS5_SALTY 30S ribosomal protein S5   | 17 |                 | ATIDGLENMNSPEMVA AKR             | 138 | 19 | 5  | 15.49  | b5b7*b7y12*y12                                                               | 2046.99 | 55.739  | 1857   | 4 | 512.50  | -3.88  |
| P0A7W4 RS5_SALTY 30S ribosomal protein S5   | 18 | Oxidation+M(14) | ATIDGLENMNSPEMVA AK              | 138 | 18 | 4  | 23.57  | b7y8*y8y9                                                                    | 1906.90 | 83.127  | 3113   | 2 | 953.96  | 7.94   |
| P0A7W4 RS5_SALTY 30S ribosomal protein S5   | 19 | Oxidation+M(3)  | VFMQPA SEG TGIIAGGAMR            | 93  | 19 | 4  | 26.74  | b3b9b10y3                                                                    | 1908.91 | 76.084  | 2735   | 4 | 477.98  | -12.66 |
| P0A7W4 RS5_SALTY 30S ribosomal protein S5   | 20 |                 | NMINVALNNGTLQ                    | 69  | 13 | 1  | 7.26   | y4                                                                           | 1401.71 | 83.424  | 2513   | 2 | 701.36  | -4.35  |
| P41031 CY_SALTY Thiosulfate-binding protein | 1  |                 | AYLNWLYSPQAQT IITHYYR            | 265 | 21 | 28 | 249.02 | b2b3b4b5*b5b6*b6y2y3y4y5y6y7y8y9y10*y10y11*y11*y11y13*y13y14y15y16y17y19y21  | 2664.33 | 93.545  | 196129 | 3 | 888.78  | 1.19   |
| P41031 CY_SALTY Thiosulfate-binding protein | 2  |                 | GLGDVLISFESEVNNIRK               | 208 | 18 | 28 | 213.39 | b2b3b4b5b6b13y2y3y4y5*y5y6y8*y8y9*y9*y9y10*y10y11*y11*y11y12*y12y13y14y16y18 | 1990.03 | 101.638 | 182579 | 3 | 664.02  | -14.48 |
| P41031 CY_SALTY Thiosulfate-binding protein | 3  |                 | VNNPEIMGK                        | 286 | 9  | 13 | 91.47  | b2*b2b3b6b9y2y3y4y6y7y8*y8y9                                                 | 1001.50 | 36.771  | 140938 | 2 | 501.25  | -9.32  |
| P41031 CY_SALTY Thiosulfate-binding protein | 4  |                 | FGSWPEVMK                        | 311 | 9  | 11 | 69.18  | b2b3*b3b4y1y2y3y5y8*y8y9                                                     | 1080.51 | 69.161  | 113100 | 2 | 540.76  | -5.20  |
| P41031 CY_SALTY Thiosulfate-binding protein | 5  |                 | NIHDWSDLVR                       | 132 | 10 | 11 | 89.63  | b4y1y2y3y4y5y6y7y8y10*y10                                                    | 1254.62 | 63.152  | 95827  | 2 | 627.81  | -1.75  |
| P41031 CY_SALTY Thiosulfate-binding protein | 6  |                 | QYEAQGFEVVIPK                    | 226 | 13 | 14 | 83.28  | b2*b2b11*b11*b11b12b13y2y3y5y8y10y11y13                                      | 1507.78 | 70.549  | 95610  | 2 | 754.39  | 0.65   |
| P41031 CY_SALTY Thiosulfate-binding protein | 7  |                 | LPNNSSPFYSTMGFLVR                | 110 | 17 | 15 | 83.56  | b2b3*b3b4*b4b7y1y2y3y5y6y11y12y13y17                                         | 1929.97 | 92.572  | 92030  | 2 | 965.49  | 7.15   |

|                                             |    |  |                                 |     |    |    |        |                                                                                                         |         |         |        |   |         |        |
|---------------------------------------------|----|--|---------------------------------|-----|----|----|--------|---------------------------------------------------------------------------------------------------------|---------|---------|--------|---|---------|--------|
| P41031 CY_SALTY Thiosulfate-binding protein | 8  |  | ELFAALNPPFEQQWAK                | 37  | 16 | 15 | 73.63  | b5°b5b7*b7b8y1y4y9°y9y10°y10y12y13*y13y16                                                               | 1888.97 | 90.424  | 76104  | 2 | 944.99  | 6.27   |
| P41031 CY_SALTY Thiosulfate-binding protein | 9  |  | TEQFMTQFLK                      | 179 | 10 | 13 | 77.07  | b2°b2b3b4*b4y2y3y5y7y8°y8*y8y10                                                                         | 1272.63 | 76.010  | 71239  | 2 | 636.82  | -1.06  |
| P41031 CY_SALTY Thiosulfate-binding protein | 10 |  | NVEVFDTGGR                      | 189 | 10 | 10 | 88.84  | b2b4b8y4y5y6y7y8°y8y10                                                                                  | 1093.52 | 47.790  | 68532  | 2 | 547.26  | -9.60  |
| P41031 CY_SALTY Thiosulfate-binding protein | 11 |  | QALAILQGLK                      | 71  | 10 | 11 | 76.1   | b2*b2b3*b3b10y1y3y5y6y7y8                                                                               | 1054.65 | 75.571  | 53125  | 2 | 527.83  | -9.61  |
| P41031 CY_SALTY Thiosulfate-binding protein | 12 |  | GLGDVLISFESEVNNIR               | 208 | 17 | 6  | 16.93  | b2b11y4*y4y10y17                                                                                        | 1861.97 | 107.648 | 35998  | 2 | 931.49  | 4.20   |
| P41031 CY_SALTY Thiosulfate-binding protein | 13 |  | ADVVTYNQVTDVQILHDK              | 81  | 18 | 4  | 23.57  | b3y3y4y18                                                                                               | 2058.05 | 64.570  | 9042   | 3 | 686.69  | -2.14  |
| P41031 CY_SALTY Thiosulfate-binding protein | 14 |  | TN1LAEFPVAWVDK                  | 239 | 14 | 6  | 28.58  | b3°b3b11y5°y5y7                                                                                         | 1602.84 | 97.798  | 11181  | 2 | 801.93  | -4.87  |
| P41031 CY_SALTY Thiosulfate-binding protein | 15 |  | GATTTFAER                       | 199 | 9  | 4  | 58.65  | y3y4y6y7                                                                                                | 953.46  | 31.325  | 5336   | 1 | 953.46  | -8.07  |
| P41031 CY_SALTY Thiosulfate-binding protein | 16 |  | YTYLAAWGAADNADGGDK              | 159 | 18 | 4  | 16.16  | b6y6°y6y8                                                                                               | 1858.84 | 54.098  | 3512   | 4 | 465.47  | 10.77  |
| P41031 CY_SALTY Thiosulfate-binding protein | 17 |  | TN1LAEFPVAWVDKNVQANGTEK         | 239 | 23 | 19 | 165.74 | b3b4b6*b6b14y4y5y6*y6y9y12y13y14y16y17y18°y18y19y20                                                     | 2544.31 | 91.080  | 262811 | 3 | 848.77  | -0.38  |
| P41031 CY_SALTY Thiosulfate-binding protein | 18 |  | LIPADWQSRLPNNSSPFYSTMGFLVR      | 101 | 26 | 5  | 35.79  | y5y8y9y11y24                                                                                            | 2996.52 | 96.365  | 95118  | 3 | 999.51  | 4.56   |
| P41031 CY_SALTY Thiosulfate-binding protein | 19 |  | YTYLAAWGAADNADGGDKAK            | 159 | 20 | 8  | 48.45  | b13*b13y3y6y11y14y18*y18                                                                                | 2057.95 | 62.749  | 83610  | 3 | 686.65  | -3.91  |
| P41031 CY_SALTY Thiosulfate-binding protein | 20 |  | NVEVFDTGGRGATTTFAER             | 189 | 19 | 13 | 112.87 | b3b4*b4b10b11b16y3y4y5y9y14y16y17                                                                       | 2027.97 | 57.248  | 48422  | 3 | 676.66  | -6.20  |
| P41031 CY_SALTY Thiosulfate-binding protein | 21 |  | KQYEAQGFEVVIPK                  | 225 | 14 | 9  | 52.34  | b4*b4b8*b8b10b11y5y12°y12                                                                               | 1635.86 | 63.869  | 35012  | 3 | 545.96  | -11.27 |
| P41031 CY_SALTY Thiosulfate-binding protein | 22 |  | ADVVTYNQVTDVQILHDKGK            | 81  | 20 | 6  | 54.19  | b3b4y3y4y5y17                                                                                           | 2243.13 | 59.288  | 24968  | 4 | 561.54  | -14.91 |
| P41031 CY_SALTY Thiosulfate-binding protein | 23 |  | GNPKNIHDWSDLVR                  | 128 | 14 | 3  | 19.98  | b3b8y9                                                                                                  | 1650.83 | 84.025  | 13712  | 3 | 550.95  | -2.07  |
| P41031 CY_SALTY Thiosulfate-binding protein | 24 |  | THFASGGELDKLLAAGR               | 320 | 17 | 4  | 16.93  | b3b12°b12y4                                                                                             | 1742.91 | 66.725  | 8328   | 3 | 581.64  | -5.11  |
| P41031 CY_SALTY Thiosulfate-binding protein | 25 |  | VEEKFGSWPEVMK                   | 307 | 13 | 3  | 21.36  | b12y6y9                                                                                                 | 1565.75 | 67.129  | 2432   | 2 | 783.38  | -10.45 |
| P41031 CY_SALTY Thiosulfate-binding protein | 26 |  | GSWPEVMK                        | 312 | 8  | 0  | 1.51   |                                                                                                         | 933.45  | 69.203  | 7614   | 1 | 933.45  | -2.55  |
| P41031 CY_SALTY Thiosulfate-binding protein | 27 |  | HDWSDLVR                        | 134 | 8  | 0  | 1.88   |                                                                                                         | 1027.51 | 63.109  | 2999   | 2 | 514.26  | 14.49  |
| P41031 CY_SALTY Thiosulfate-binding protein | 28 |  | NVEVFDTG                        | 189 | 8  | 0  | 1.88   |                                                                                                         | 880.41  | 47.777  | 2192   | 1 | 880.41  | 9.84   |
| O33921 AGP_SALTY Glucose-1-phohatase        | 1  |  | VTVLVGHDNSIASLLTALDFKPYQLHDQYER | 304 | 31 | 36 | 179.39 | b1b2°b2b4°b4b10b11b12°b12b13°b13b14°b14y1y2°y2y3y4°y4*y4y5°y5y6y7y9°y9y10y11°y11*y12°y12y16y17y19y20y31 | 3542.78 | 96.485  | 198576 | 5 | 709.36  | -13.71 |
| O33921 AGP_SALTY Glucose-1-phohatase        | 2  |  | TPIGGQLVFQR                     | 335 | 11 | 10 | 86.47  | b1b2y3*y3y4y5y7y8y9y11                                                                                  | 1215.68 | 62.075  | 118221 | 2 | 608.34  | -2.61  |
| O33921 AGP_SALTY Glucose-1-phohatase        | 3  |  | MGTMDPFTFNPVITDDSAAFR           | 141 | 20 | 19 | 134.47 | b2b3b5°b5b12y2y3y5y6y7y8y9y11°y11y12y14y15y20*y20                                                       | 2186.01 | 79.204  | 105942 | 2 | 1093.51 | 9.27   |
| O33921 AGP_SALTY Glucose-1-phohatase        | 4  |  | NVAAPLVK                        | 281 | 8  | 6  | 41.73  | b2y1y4y5y6y8                                                                                            | 811.49  | 40.632  | 74959  | 2 | 406.25  | -11.81 |
| O33921 AGP_SALTY Glucose-1-phohatase        | 5  |  | IEYVYQSAR                       | 358 | 9  | 15 | 76.69  | b2b3°b3b9y1y2y3y5*y5y6y7y8*y8y9*y9                                                                      | 1128.56 | 43.168  | 59111  | 2 | 564.78  | -5.19  |

|                                                      |    |                                                |                                                 |     |    |    |        |                                                       |         |         |       |   |         |        |
|------------------------------------------------------|----|------------------------------------------------|-------------------------------------------------|-----|----|----|--------|-------------------------------------------------------|---------|---------|-------|---|---------|--------|
| O33921 AGP_SALTY Glucose-1-phohatase                 | 6  |                                                | NAEALTLK                                        | 370 | 8  | 11 | 82.33  | b3b4*b4b6°b6*b6y3y4y6y8*y8                            | 859.48  | 41.677  | 56836 | 2 | 430.24  | -7.81  |
| O33921 AGP_SALTY Glucose-1-phohatase                 | 7  | Carbamidomethyl+C(14)                          | EWLV AQGLIPSGECPAPDVTYAY<br>ANSLQR              | 87  | 29 | 20 | 104.47 | b3°b3b4b9b12°b12b14y2y3y4y6y7*y7y9y10°y10y11y13y15y29 | 3205.59 | 94.493  | 44770 | 3 | 1069.20 | 9.06   |
| O33921 AGP_SALTY Glucose-1-phohatase                 | 8  |                                                | QQAVQAMEK                                       | 161 | 9  | 9  | 69.18  | b2*b2y3y4y5*y5y6y7y9                                  | 1032.51 | 26.926  | 40432 | 2 | 516.76  | -8.39  |
| O33921 AGP_SALTY Glucose-1-phohatase                 | 9  | Carbamidomethyl+C(16)                          | TVATAQFFITGAFPGCDIPVHHQE<br>K                   | 116 | 25 | 3  | 19.02  | y5y7y12                                               | 2771.34 | 79.524  | 34605 | 4 | 693.59  | -6.25  |
| O33921 AGP_SALTY Glucose-1-phohatase                 | 10 |                                                | VGNSLVDAFTLQYYEGFPMQVA<br>WGGIHTDR              | 226 | 31 | 5  | 22.98  | y3°y3y6°y6y7                                          | 3486.66 | 105.048 | 30570 | 3 | 1162.89 | 6.44   |
| O33921 AGP_SALTY Glucose-1-phohatase                 | 11 |                                                | APLANNGSVLAQSTPNAWPAWD<br>VPGGQLTTK             | 43  | 31 | 11 | 45.98  | b2b3b4b9°b9b14b18y8y13y14y31                          | 3161.62 | 84.276  | 30435 | 3 | 1054.55 | 6.41   |
| O33921 AGP_SALTY Glucose-1-phohatase                 | 12 |                                                | GGVLEVYMGHYTR                                   | 74  | 13 | 8  | 57.98  | b3b5y1y3y5y6y7y13                                     | 1481.70 | 64.086  | 29569 | 3 | 494.57  | -12.44 |
| O33921 AGP_SALTY Glucose-1-phohatase                 | 13 |                                                | SQLHLDSEYK                                      | 172 | 10 | 10 | 53.99  | b1°b1b2°b2b3b8y4y6y7y10                               | 1219.60 | 40.838  | 24059 | 2 | 610.30  | 0.70   |
| O33921 AGP_SALTY Glucose-1-phohatase                 | 14 | Carbamidomethyl+C(14)                          | LLEQITHYQDSPSCKEK                               | 182 | 17 | 8  | 49.94  | b2y2y6y7y10y11y15y17                                  | 2076.00 | 48.415  | 14373 | 3 | 692.67  | -5.41  |
| O33921 AGP_SALTY Glucose-1-phohatase                 | 15 | Carbamidomethyl+C(14)                          | LLEQITHYQDSPSCK                                 | 182 | 15 | 3  | 24.83  | b8b9y3                                                | 1818.86 | 60.742  | 3465  | 3 | 606.96  | -4.56  |
| O33921 AGP_SALTY Glucose-1-phohatase                 | 16 | Carbamidomethyl+C(8);<br>Carbamidomethyl+C(16) | VTLELKGPCVDANGFCPLDK                            | 383 | 20 | 5  | 14.9   | b14*b14y6°y6y9                                        | 2233.09 | 68.502  | 81463 | 3 | 745.03  | -5.47  |
| O33921 AGP_SALTY Glucose-1-phohatase                 | 17 | Carbamidomethyl+C(2);<br>Carbamidomethyl+C(10) | GCPVDANGFCPLDKFDNMNTA<br>AK                     | 389 | 24 | 8  | 62.51  | b22y3y8y10y13y14y20y22                                | 2641.19 | 79.136  | 78497 | 3 | 881.07  | 2.40   |
| O33921 AGP_SALTY Glucose-1-phohatase                 | 18 |                                                | LKNGYQDSLFTSPTVAR                               | 264 | 17 | 14 | 126.5  | b7°b7b8b9b10b12b14y3y5°y5y6y7y8y11                    | 1896.97 | 59.273  | 75131 | 3 | 632.99  | -7.66  |
| O33921 AGP_SALTY Glucose-1-phohatase                 | 19 |                                                | HNLRAPLANNGSVLAQSTPNAWP<br>AWDVPGGQLTTK         | 39  | 35 | 9  | 32.19  | b12°b12b14b15b22°b22b27y8y13                          | 3681.87 | 78.273  | 72979 | 4 | 921.22  | -4.24  |
| O33921 AGP_SALTY Glucose-1-phohatase                 | 20 |                                                | VTVLVGHDNSNIASLLTALDFKPYQ<br>LHDQYERTPIGGQLVFQR | 304 | 42 | 6  | 21.64  | b9b10°b10b24y3*y3                                     | 4739.43 | 98.476  | 47939 | 6 | 790.74  | -14.22 |
| O33921 AGP_SALTY Glucose-1-phohatase                 | 21 |                                                | MGTMDPTFNPVITDDSAFRQQA<br>VQAMEK                | 141 | 29 | 7  | 26.9   | b3°b3y3y4°y4y15y24                                    | 3199.52 | 82.501  | 30365 | 3 | 1067.18 | 9.54   |
| O33921 AGP_SALTY Glucose-1-phohatase                 | 22 |                                                | VGNSLVDAFTLQYYEGFPMQVA<br>WGGIHTDRQWK           | 226 | 34 | 3  | 37.21  | y6y7y8                                                | 3928.87 | 85.008  | 15437 | 3 | 1310.30 | -1.18  |
| O33921 AGP_SALTY Glucose-1-phohatase                 | 23 | Carbamidomethyl+C(24)                          | SQLHLDSEYKLLQITHYQDSPSCK                        | 172 | 25 | 3  | 12.8   | b6y3y5                                                | 3019.43 | 82.514  | 8974  | 5 | 604.69  | -4.61  |
| O33921 AGP_SALTY Glucose-1-phohatase                 | 24 |                                                | DLMKIEYVYQSAR                                   | 354 | 13 | 4  | 21.36  | b7b9y10°y10                                           | 1615.83 | 66.728  | 6461  | 2 | 808.42  | 12.09  |
| O33921 AGP_SALTY Glucose-1-phohatase                 | 25 | Phosphoryl STY(6)                              | NAEALTLK                                        | 370 | 8  | 3  | 33.95  | b5y3y4                                                | 939.45  | 33.341  | 4455  | 2 | 470.23  | 10.20  |
| O33921 AGP_SALTY Glucose-1-phohatase                 | 26 |                                                | LEVYMGHYTR                                      | 77  | 10 | 0  | 3.01   |                                                       | 1268.61 | 64.084  | 6249  | 2 | 634.81  | 2.02   |
| O33921 AGP_SALTY Glucose-1-phohatase                 | 27 |                                                | LHLDESYK                                        | 174 | 8  | 1  | 8.43   | b6                                                    | 1004.50 | 40.862  | 3374  | 2 | 502.75  | -7.23  |
| O33921 AGP_SALTY Glucose-1-phohatase                 | 28 |                                                | EVYMGHYTR                                       | 78  | 9  | 0  | 3.01   |                                                       | 1155.51 | 64.060  | 2052  | 2 | 578.26  | -10.04 |
| O33921 AGP_SALTY Glucose-1-phohatase                 | 29 |                                                | NVAAPLVK                                        | 281 | 8  | 0  | 1.13   |                                                       | 794.47  | 40.631  | 3529  | 2 | 397.74  | -2.92  |
| O33921 AGP_SALTY Glucose-1-phohatase                 | 30 |                                                | QQAVQAMEK                                       | 161 | 9  | 0  | 1.51   |                                                       | 1015.49 | 26.927  | 3358  | 2 | 508.25  | 9.68   |
| O33921 AGP_SALTY Glucose-1-phohatase                 | 31 |                                                | NAEALTLK                                        | 370 | 8  | 0  | 1.13   |                                                       | 842.46  | 41.705  | 2193  | 2 | 421.73  | -1.81  |
| Q7CQN4 LPP1_SALTY Major outer membrane lipoprotein 1 | 1  |                                                | SDVQAAKDDAAR                                    | 52  | 12 | 12 | 81.81  | b1°b1b2°b2b8b9y3y4y6y7°y7y8                           | 1246.59 | 18.650  | 13018 | 2 | 623.80  | -6.27  |



|                                                      |    |                                             |                                       |     |    |    |        |                                                              |         |         |       |   |         |        |
|------------------------------------------------------|----|---------------------------------------------|---------------------------------------|-----|----|----|--------|--------------------------------------------------------------|---------|---------|-------|---|---------|--------|
| Q7CQN4 LPP1_SALTY Major outer membrane lipoprotein 1 | 2  |                                             | VDQLSNDVNAMR                          | 40  | 12 | 5  | 35.31  | b10y8y9y11y12                                                | 1361.65 | 49.369  | 12122 | 2 | 681.33  | -0.09  |
| Q7CQN4 LPP1_SALTY Major outer membrane lipoprotein 1 | 3  |                                             | IDQLSSDVQTLNAK                        | 26  | 14 | 4  | 27.76  | b3°b3b9b10                                                   | 1531.79 | 78.190  | 3462  | 2 | 766.40  | -2.07  |
| Q8ZP20 TREA_SALTY Periplasmic trehalase              | 1  |                                             | VAAAAQAHLQLPGGLATTSVK                 | 428 | 21 | 11 | 78.08  | b2b3b9b10b11b12y5y8y10y19y21                                 | 2004.12 | 58.451  | 88534 | 3 | 668.71  | -2.92  |
| Q8ZP20 TREA_SALTY Periplasmic trehalase              | 2  |                                             | TFADAIPNSDPLMILADYR                   | 68  | 19 | 23 | 118.89 | b1b2b4b5°b5b6°b6b13*b13b14y2y3°y3y4°y4y5°y5y7y9y13°y13y14y19 | 2123.07 | 102.130 | 59971 | 2 | 1062.04 | 9.77   |
| Q8ZP20 TREA_SALTY Periplasmic trehalase              | 3  |                                             | TTTIAPVDLNALLYQLEK                    | 335 | 18 | 9  | 35.86  | b2°b2b3°b3y1y3y5y13y14                                       | 2003.12 | 104.308 | 55414 | 2 | 1002.06 | 6.64   |
| Q8ZP20 TREA_SALTY Periplasmic trehalase              | 4  |                                             | YVPPAGQSLREHIDGLWPVLTR                | 113 | 22 | 7  | 31.76  | b1b2b5y3y5y11y20                                             | 2504.30 | 84.364  | 55178 | 4 | 626.83  | -14.62 |
| Q8ZP20 TREA_SALTY Periplasmic trehalase              | 5  |                                             | WMDNPQQLSTIR                          | 323 | 12 | 6  | 30.23  | y2y4y9*y9y10y12                                              | 1488.73 | 63.082  | 47005 | 2 | 744.87  | 5.41   |
| Q8ZP20 TREA_SALTY Periplasmic trehalase              | 6  |                                             | SNPNRPATEIYR                          | 296 | 12 | 8  | 65.53  | b2y3y4°y4y6y7y10y12                                          | 1417.71 | 33.137  | 37051 | 3 | 473.24  | -7.40  |
| Q8ZP20 TREA_SALTY Periplasmic trehalase              | 7  |                                             | YVPPAGQSLR                            | 113 | 10 | 9  | 59.55  | b4b5b6b9y1y6°y6*y6y10                                        | 1087.58 | 20.329  | 31633 | 2 | 544.29  | -8.19  |
| Q8ZP20 TREA_SALTY Periplasmic trehalase              | 8  |                                             | SAAASGWDFSSR                          | 311 | 12 | 4  | 30.23  | y8y9y11y12                                                   | 1241.57 | 54.457  | 25956 | 2 | 621.29  | 12.19  |
| Q8ZP20 TREA_SALTY Periplasmic trehalase              | 9  |                                             | SQPPFFAFMVELLAQHEGDDALK               | 212 | 23 | 6  | 24.56  | b6b7b10y2y7°y7                                               | 2590.27 | 91.077  | 12154 | 3 | 864.09  | 2.07   |
| Q8ZP20 TREA_SALTY Periplasmic trehalase              | 10 |                                             | HFVDVNFTLPK                           | 98  | 11 | 9  | 32.07  | b1b2b4b5b7b11*b11y11*y11                                     | 1316.70 | 70.210  | 10244 | 2 | 658.85  | -2.13  |
| Q8ZP20 TREA_SALTY Periplasmic trehalase              | 11 |                                             | WDSLLPLPESYVVPGGR                     | 142 | 17 | 6  | 33.99  | b5b12°b12y4y9y12                                             | 1885.00 | 92.168  | 5888  | 2 | 943.00  | 6.67   |
| Q8ZP20 TREA_SALTY Periplasmic trehalase              | 12 |                                             | DQLTAAALFLPLYVNAAAKDR                 | 405 | 20 | 4  | 23.03  | b3b4y3y20                                                    | 2148.11 | 81.360  | 2529  | 3 | 716.71  | -14.09 |
| Q8ZP20 TREA_SALTY Periplasmic trehalase              | 13 |                                             | TYYLSR                                | 206 | 6  | 1  | 13.91  | y4                                                           | 802.40  | 38.188  | 8977  | 2 | 401.71  | -6.31  |
| Q8ZP20 TREA_SALTY Periplasmic trehalase              | 14 |                                             | ASAAAGDR                              | 357 | 8  | 3  | 36.96  | b3b6y3                                                       | 718.36  | 37.081  | 4931  | 1 | 718.36  | 22.18  |
| Q8ZP20 TREA_SALTY Periplasmic trehalase              | 15 |                                             | VADMVANFGYEIDAWGHIPNGNR               | 183 | 23 | 4  | 13.49  | b4b10*b10y6                                                  | 2546.21 | 81.811  | 4275  | 3 | 849.41  | 7.48   |
| Q8ZP20 TREA_SALTY Periplasmic trehalase              | 16 | Carbamidomethyl+C(6); Carbamidomethyl+C(12) | MLDLICPQEKPCDSVPSTRPASLS ATPK         | 534 | 29 | 4  | 17.5   | b13y3y14y23                                                  | 3199.61 | 64.759  | 3068  | 3 | 1067.21 | 9.16   |
| Q8ZP20 TREA_SALTY Periplasmic trehalase              | 17 |                                             | DTPRPESWVEDIATAK                      | 280 | 16 | 4  | 39.83  | b3b5b8b12                                                    | 1814.89 | 63.253  | 2640  | 2 | 907.95  | 1.14   |
| Q8ZP20 TREA_SALTY Periplasmic trehalase              | 18 |                                             | NVEKWSLLPLPESYVVPGGR                  | 138 | 21 | 10 | 78.38  | b6*b6b11y3y4y5y6y8y10y12                                     | 2355.24 | 88.425  | 55491 | 3 | 785.75  | 1.04   |
| Q8ZP20 TREA_SALTY Periplasmic trehalase              | 19 | Carbamidomethyl+C(6); Carbamidomethyl+C(12) | MLDLICPQEKPCDSVPSTRPASLS ATPKTPSAATQ  | 534 | 36 | 6  | 26.57  | b3b4b6b26y10y21                                              | 3855.90 | 64.713  | 51814 | 4 | 964.73  | 1.08   |
| Q8ZP20 TREA_SALTY Periplasmic trehalase              | 20 |                                             | DTPRPESWVEDIATAKSNPNRPAT EIYR         | 280 | 28 | 3  | 12.01  | b12b24y10                                                    | 3213.58 | 93.659  | 4164  | 5 | 643.52  | -4.63  |
| Q8ZP20 TREA_SALTY Periplasmic trehalase              | 21 |                                             | LFPDQKTFADAIPNSDPLMILADY R            | 62  | 25 | 3  | 22.34  | b10b11y10                                                    | 2851.42 | 93.342  | 2068  | 3 | 951.15  | -4.37  |
| Q8ZP20 TREA_SALTY Periplasmic trehalase              | 22 | Oxidation+M(13)                             | TFADAIPNSDPLMILADYR                   | 68  | 19 | 3  | 22.45  | b5b8b13                                                      | 2139.04 | 102.831 | 13751 | 3 | 713.69  | -0.91  |
| Q8ZP20 TREA_SALTY Periplasmic trehalase              | 23 | Oxidation+M(32)                             | SGQQWDAPNGWAPLQWVAEGL QNYGQDDVAMEVTWR | 449 | 37 | 3  | 10.93  | b5b12y10                                                     | 4189.90 | 76.977  | 2882  | 4 | 1048.23 | -1.75  |
| Q8ZP20 TREA_SALTY Periplasmic trehalase              | 24 |                                             | PNRPATEIYR                            | 298 | 10 | 0  | 2.64   |                                                              | 1216.64 | 33.090  | 11733 | 2 | 608.82  | -2.01  |
| Q8ZP20 TREA_SALTY Periplasmic trehalase              | 25 |                                             | HFVDVNFTLPK                           | 98  | 11 | 1  | 8.01   | y10                                                          | 1299.67 | 70.218  | 3450  | 2 | 650.34  | -2.54  |

|                                                           |    |                       |                                     |     |    |    |        |                                                        |         |         |        |   |         |        |
|-----------------------------------------------------------|----|-----------------------|-------------------------------------|-----|----|----|--------|--------------------------------------------------------|---------|---------|--------|---|---------|--------|
| Q8ZP20 TREA_SALTY Periplasmic trehalase                   | 26 |                       | SNPNRPATEIYR                        | 296 | 12 | 1  | 7.72   | b9                                                     | 1400.67 | 33.120  | 1845   | 3 | 467.56  | -13.60 |
| P0A1Z2 SKP_SALTY Chaperone protein skp                    | 1  |                       | IAIVNMGNLFQQVAQK                    | 23  | 16 | 22 | 147.83 | b2b3b4b6*b6b8b12y1y2*y2y3y4y5*y5y6*y6y7*y7y1ly12y13y16 | 1773.97 | 90.442  | 119216 | 2 | 887.49  | 3.58   |
| P0A1Z2 SKP_SALTY Chaperone protein skp                    | 2  |                       | METDLQSK                            | 59  | 8  | 9  | 41.73  | b2b8y2y4y6°y6y7°y7y8                                   | 951.43  | 27.289  | 106590 | 2 | 476.22  | -14.18 |
| P0A1Z2 SKP_SALTY Chaperone protein skp                    | 3  |                       | TGVSNTLENEFK                        | 39  | 12 | 14 | 102.46 | b2°b2b9y2y4y5y6y7y8*y8y9y10°y10y12                     | 1338.66 | 58.344  | 105661 | 2 | 669.83  | 1.82   |
| P0A1Z2 SKP_SALTY Chaperone protein skp                    | 4  |                       | VANDQSIDL VVDANTVAYNSSDV K DITADVLK | 126 | 32 | 14 | 53.7   | b4b5°b5b6b10b14*b14b18y1y2y14y23y25y32                 | 3392.73 | 90.453  | 63728  | 3 | 1131.58 | 6.84   |
| P0A1Z2 SKP_SALTY Chaperone protein skp                    | 5  |                       | LEKDVMSQR                           | 82  | 9  | 4  | 46.1   | b4b6y3y4                                               | 1105.56 | 49.768  | 3794   | 2 | 553.29  | -2.76  |
| P0A1Z2 SKP_SALTY Chaperone protein skp                    | 6  |                       | VANDQSIDL VVDANTVAYNSSDV K          | 126 | 24 | 5  | 13.12  | b3b14*b14y8*y8                                         | 2537.25 | 84.893  | 25784  | 3 | 846.42  | 4.81   |
| P0A1Z2 SKP_SALTY Chaperone protein skp                    | 7  |                       | AAELQKMETDLQSK                      | 53  | 14 | 12 | 83.21  | b3b8b10y3°y3*y3y7y9y10°y10*y10y12                      | 1591.78 | 51.638  | 130366 | 3 | 531.27  | -10.74 |
| P0A1Z2 SKP_SALTY Chaperone protein skp                    | 8  |                       | AQAFEKDR                            | 97  | 8  | 3  | 41.73  | y3y5y6                                                 | 964.48  | 18.362  | 11706  | 2 | 482.74  | -6.39  |
| P0A1Z2 SKP_SALTY Chaperone protein skp                    | 9  |                       | LEKDVMSQR                           | 82  | 9  | 3  | 39.1   | y3y6y7                                                 | 1105.55 | 28.068  | 5255   | 2 | 553.28  | -12.04 |
| P0A1Z2 SKP_SALTY Chaperone protein skp                    | 10 |                       | TGVSNTLENEFKGR                      | 39  | 14 | 3  | 25.42  | b8b9y13                                                | 1551.77 | 100.462 | 3395   | 2 | 776.39  | -2.99  |
| P0A251 AHPC_SALTY Alkyl hydroperoxide reductase subunit C | 1  | Carbamidomethyl+C(13) | AAQYVA AHPGEVCPAK                   | 153 | 16 | 13 | 88.25  | b2b3b4b5*b5b8y2y3y4y8y11y12y16                         | 1668.79 | 35.908  | 48834  | 3 | 556.94  | -14.70 |
| P0A251 AHPC_SALTY Alkyl hydroperoxide reductase subunit C | 2  |                       | YAMIGDPTGALTR                       | 93  | 13 | 9  | 54.67  | b1b2b3b4b9y7y10°y10y11                                 | 1365.69 | 63.702  | 47123  | 2 | 683.35  | 2.95   |
| P0A251 AHPC_SALTY Alkyl hydroperoxide reductase subunit C | 3  |                       | NFDNMREDEGLADR                      | 106 | 14 | 8  | 42.75  | b1*b1y4y5y6°y6y12y14                                   | 1681.70 | 47.654  | 44375  | 3 | 561.24  | -12.92 |
| P0A251 AHPC_SALTY Alkyl hydroperoxide reductase subunit C | 4  |                       | ATFVVDPQGIIQAEIVTAEGIGR             | 120 | 23 | 18 | 114.91 | b2°b2b3°b3b4b5b6b9b10y2y3y4y5y7°y7y9y10y23             | 2384.27 | 129.118 | 25910  | 3 | 795.43  | -2.97  |
| P0A251 AHPC_SALTY Alkyl hydroperoxide reductase subunit C | 5  |                       | LGVDVYSVSTDTHFTHK                   | 63  | 17 | 10 | 55.7   | b1b3b4°b4b7y3°y3y5y6y9                                 | 1905.93 | 58.053  | 24236  | 3 | 635.98  | -0.06  |
| P0A251 AHPC_SALTY Alkyl hydroperoxide reductase subunit C | 6  | Carbamidomethyl+C(15) | WSVFFFPADFTFVCPTELGDVA DHYEELQK     | 32  | 31 | 4  | 11.47  | b4b6y8y31                                              | 3757.75 | 120.029 | 8909   | 3 | 1253.26 | 9.42   |
| P0A251 AHPC_SALTY Alkyl hydroperoxide reductase subunit C | 7  |                       | ATFVVDPQGIIQAEIVTAEGIGRDA SDLLR     | 120 | 30 | 4  | 11.63  | b3b6y16y30                                             | 3154.69 | 137.222 | 3322   | 3 | 1052.24 | 5.19   |
| P0A251 AHPC_SALTY Alkyl hydroperoxide reductase subunit C | 8  |                       | AWHSSSETIAK                         | 80  | 11 | 12 | 103.54 | b3b4b5°b5b8°b8b9°b9b10y3y8°y8                          | 1216.57 | 30.038  | 39679  | 3 | 406.20  | -18.66 |
| P0A251 AHPC_SALTY Alkyl hydroperoxide reductase subunit C | 9  |                       | NGEFIEVTEK                          | 17  | 10 | 3  | 34.7   | y5y7y8                                                 | 1165.55 | 89.415  | 2723   | 3 | 389.19  | -17.28 |
| P0A251 AHPC_SALTY Alkyl hydroperoxide reductase subunit C | 10 |                       | IKYAMIGDPTGALTR                     | 91  | 15 | 6  | 49.2   | b8b11y3y5y6y10                                         | 1606.84 | 63.303  | 23356  | 3 | 536.28  | -14.74 |
| P0A251 AHPC_SALTY Alkyl hydroperoxide reductase subunit C | 11 | Carbamidomethyl+C(13) | AAQYVA AHPGEVCPAKWK                 | 153 | 18 | 4  | 27.48  | b4b6b7y10                                              | 1982.97 | 47.206  | 6493   | 4 | 496.50  | -11.45 |
| P0A251 AHPC_SALTY Alkyl hydroperoxide reductase subunit C | 12 |                       | NGEFIEVTEKDTEGR                     | 17  | 15 | 3  | 18.81  | b7y5y7                                                 | 1723.79 | 86.454  | 4116   | 3 | 575.27  | -11.26 |
| P0A251 AHPC_SALTY Alkyl hydroperoxide reductase subunit C | 13 | Phosphoryl STY(17)    | ATFVVDPQGIIQAEIVTAEGIGR             | 120 | 23 | 4  | 20.88  | b8y3y5y8                                               | 2464.27 | 82.478  | 19911  | 3 | 822.10  | 13.77  |
| P0A251 AHPC_SALTY Alkyl hydroperoxide reductase subunit C | 14 |                       | STDTHFTHK                           | 71  | 9  | 2  | 21.17  | b4b5                                                   | 1073.52 | 58.055  | 8314   | 2 | 537.26  | 14.67  |
| P0A251 AHPC_SALTY Alkyl hydroperoxide reductase subunit C | 15 |                       | YAMIGDPTGA                          | 93  | 10 | 0  | 3.01   |                                                        | 995.44  | 63.653  | 6215   | 2 | 498.22  | -12.20 |
| P0A251 AHPC_SALTY Alkyl hydroperoxide reductase subunit C | 16 | Carbamidomethyl+C(11) | QYVA AHPGEVCPAK                     | 155 | 14 | 0  | 4.14   |                                                        | 1526.73 | 35.940  | 1646   | 3 | 509.58  | -7.44  |

|                                                  |    |                       |                                  |     |    |    |        |                                                                         |         |         |        |   |         |        |
|--------------------------------------------------|----|-----------------------|----------------------------------|-----|----|----|--------|-------------------------------------------------------------------------|---------|---------|--------|---|---------|--------|
| P0A1W6 LIVK_SALTY Leucine-ecific-binding protein | 1  |                       | LQKENIDFVYYGGYYPEMQMLR           | 211 | 23 | 12 | 69.15  | b9b15y1y2y5y6y8°y8y9y11y12y23                                           | 2814.35 | 85.435  | 53907  | 3 | 938.79  | 7.46   |
| P0A1W6 LIVK_SALTY Leucine-ecific-binding protein | 2  |                       | TAGLDSSQGPTAAK                   | 139 | 14 | 19 | 157.75 | b3°b3b4b5°b5b9b11b12y5y7°y7*y7y8y9y10y11y12y14*y14                      | 1303.64 | 29.477  | 50523  | 2 | 652.33  | -4.49  |
| P0A1W6 LIVK_SALTY Leucine-ecific-binding protein | 3  |                       | QGNANIVFFDGITAGEKDFSALIA R       | 186 | 25 | 11 | 51.6   | b2b3*b3b4*b4b25y13y18y19y20y25                                          | 2654.36 | 105.048 | 44411  | 3 | 885.46  | 1.75   |
| P0A1W6 LIVK_SALTY Leucine-ecific-binding protein | 4  |                       | TQFMGPEGVGNASLSNIAGGAAE GMLVTMPK | 242 | 31 | 13 | 34.22  | b2°b2*b2b3b9b16y2y4y5y11y13°y13y31                                      | 3035.49 | 93.260  | 34142  | 3 | 1012.50 | 7.56   |
| P0A1W6 LIVK_SALTY Leucine-ecific-binding protein | 5  |                       | GYQYIMR                          | 132 | 7  | 5  | 38.34  | b4y1y4y5y7                                                              | 930.45  | 47.980  | 33194  | 2 | 465.73  | -3.21  |
| P0A1W6 LIVK_SALTY Leucine-ecific-binding protein | 6  |                       | VAIVGAMSGPVAQWGDMEFNGA R         | 27  | 23 | 4  | 13.49  | b3y5y8y23                                                               | 2363.15 | 88.063  | 21452  | 3 | 788.39  | 10.95  |
| P0A1W6 LIVK_SALTY Leucine-ecific-binding protein | 7  | Carbamidomethyl+C(10) | LVGVEYDDACDPK                    | 66  | 13 | 6  | 40.25  | b2b3b4y2y8y9                                                            | 1480.66 | 47.757  | 8410   | 2 | 740.83  | -2.72  |
| P0A1W6 LIVK_SALTY Leucine-ecific-binding protein | 8  |                       | YILETVKPQR                       | 153 | 10 | 8  | 83.09  | y3*y3y4y5y6y7*y7y8                                                      | 1246.69 | 45.744  | 58201  | 3 | 416.23  | -20.56 |
| P0A1W6 LIVK_SALTY Leucine-ecific-binding protein | 9  |                       | SASHAPLDLVK                      | 316 | 11 | 3  | 32.07  | b4b5b10                                                                 | 1137.63 | 48.012  | 36179  | 2 | 569.32  | 3.43   |
| P0A1W6 LIVK_SALTY Leucine-ecific-binding protein | 10 |                       | IAIIHDK                          | 163 | 7  | 3  | 41.35  | y3y5y6                                                                  | 809.48  | 33.284  | 19919  | 2 | 405.24  | -14.78 |
| P0A1W6 LIVK_SALTY Leucine-ecific-binding protein | 11 |                       | DPSGPYVWITYAAVQSLATAMTR          | 293 | 23 | 4  | 13.49  | b5°b5y3y6                                                               | 2498.23 | 75.237  | 4375   | 4 | 625.31  | -5.18  |
| P0A1W6 LIVK_SALTY Leucine-ecific-binding protein | 12 |                       | QGNANIVFFDGITAGEK                | 186 | 17 | 4  | 16.93  | b12*b12y6y12                                                            | 1780.86 | 68.522  | 3487   | 2 | 890.93  | -17.34 |
| P0A1W6 LIVK_SALTY Leucine-ecific-binding protein | 13 |                       | GDLKGFEFGVFQWHADGSSTVA K         | 346 | 23 | 4  | 13.49  | b5°b5y13y16                                                             | 2483.23 | 100.240 | 3715   | 2 | 1242.12 | 11.50  |
| P0A1W6 LIVK_SALTY Leucine-ecific-binding protein | 14 |                       | RYDQDPANK                        | 273 | 9  | 6  | 46.1   | b3°b3b5y3*y3y5                                                          | 1106.52 | 16.076  | 1674   | 2 | 553.76  | 0.00   |
| P0A1W6 LIVK_SALTY Leucine-ecific-binding protein | 15 | Oxidation+M()         | TQFMGPEGVGNASLSNIAGGAAE GMLVTMPK | 242 | 31 | 4  | 11.47  | b3°b3b5y26                                                              | 3051.50 | 80.766  | 9390   | 3 | 1017.84 | 12.64  |
| P0A1D3 CH60_SALTY 60 kDa chaperonin              | 1  |                       | GYLSPYFINKPETGAVELESPFILL ADKK   | 197 | 29 | 20 | 145.02 | b2b3b4°b4b6°b6b7y2y3y4y5y7y9y10y11y12y13y25y26y29                       | 3239.72 | 96.130  | 136728 | 4 | 810.68  | -2.71  |
| P0A1D3 CH60_SALTY 60 kDa chaperonin              | 2  |                       | EMLPVLEAVAK                      | 231 | 11 | 9  | 75.68  | b2b3y2y3y4y6y8y9y11                                                     | 1199.66 | 80.646  | 112293 | 2 | 600.34  | -5.49  |
| P0A1D3 CH60_SALTY 60 kDa chaperonin              | 3  |                       | ANDAAGDGTTTATVLAQSIITEGL K       | 80  | 25 | 19 | 153.96 | b2°b2b3b4b5°b5b7b15y3y4°y4y5y6y7y8y9y10y11y25                           | 2418.23 | 92.786  | 90550  | 3 | 806.75  | -1.92  |
| P0A1D3 CH60_SALTY 60 kDa chaperonin              | 4  |                       | VVINKDTTTTIIDGVGEEAAIQGR         | 322 | 23 | 21 | 146.33 | b2b10°b10°b10b11b12b14b20y2y3y4y5y6y7°y7y8y9°y9y12°y12y13               | 2399.27 | 68.034  | 86744  | 3 | 800.43  | -3.46  |
| P0A1D3 CH60_SALTY 60 kDa chaperonin              | 5  | Carbamidomethyl+C(18) | SALQYAASVAGLMITTECMVTDL PK       | 501 | 25 | 28 | 201.39 | b2°b2b3b4b5°b5°b5b7b8b10°b10b12°b12b13y1y2y3y4y5y6y7y8°y8y9y10y11y12y25 | 2670.32 | 124.730 | 69542  | 3 | 890.78  | 1.19   |
| P0A1D3 CH60_SALTY 60 kDa chaperonin              | 6  |                       | AVAAAVEELK                       | 122 | 10 | 12 | 88.84  | b1b2b3b4b5y1y2y5y6y7y8y10                                               | 1000.56 | 47.940  | 50992  | 2 | 500.78  | -10.31 |
| P0A1D3 CH60_SALTY 60 kDa chaperonin              | 7  | Carbamidomethyl+C(6)  | ALSVPCSDSK                       | 132 | 10 | 11 | 59.55  | b1b2b3°b3y1y2y4y6y7y8y10                                                | 1063.51 | 35.923  | 40180  | 2 | 532.26  | -3.56  |
| P0A1D3 CH60_SALTY 60 kDa chaperonin              | 8  | Carbamidomethyl+C(6)  | QIVLNCGEEPSVVANTVK               | 452 | 18 | 11 | 54.41  | b2°b2b9°b9b12y3y5y12y14y15y18                                           | 1957.02 | 62.452  | 39361  | 2 | 979.01  | 7.73   |
| P0A1D3 CH60_SALTY 60 kDa chaperonin              | 9  |                       | VGAATEVEMK                       | 380 | 10 | 7  | 41.25  | b2b3y1y5y7y8y10                                                         | 1034.52 | 35.943  | 31861  | 2 | 517.76  | -2.95  |
| P0A1D3 CH60_SALTY 60 kDa chaperonin              | 10 |                       | AVAAGMNPMDLK                     | 105 | 12 | 11 | 102.46 | b2b3y1y3y5y6y7y8y9y10°y10                                               | 1217.61 | 59.107  | 30441  | 2 | 609.31  | 3.21   |
| P0A1D3 CH60_SALTY 60 kDa chaperonin              | 11 |                       | SFGAPTITK                        | 42  | 9  | 9  | 63.16  | b2b3b9y1y3y5y6y7y9                                                      | 921.49  | 45.526  | 29138  | 2 | 461.25  | -12.05 |

|                                     |    |                       |                                                  |     |    |    |        |                                                           |         |         |        |   |         |        |
|-------------------------------------|----|-----------------------|--------------------------------------------------|-----|----|----|--------|-----------------------------------------------------------|---------|---------|--------|---|---------|--------|
| P0A1D3 CH60_SALTY 60 kDa chaperonin | 12 |                       | VEDALHATR                                        | 395 | 9  | 9  | 63.16  | b2b8y1y3y4y5y8°y8y9                                       | 1011.51 | 26.688  | 27359  | 2 | 506.26  | -9.78  |
| P0A1D3 CH60_SALTY 60 kDa chaperonin | 13 |                       | AIAQVGTISANSDETVGK                               | 142 | 18 | 7  | 33.96  | b9b11y2y9y10y13y18                                        | 1760.91 | 49.143  | 22537  | 2 | 880.96  | 5.62   |
| P0A1D3 CH60_SALTY 60 kDa chaperonin | 14 |                       | SFGAPTITKDGVSVAR                                 | 42  | 16 | 9  | 36.71  | b1b3°b3b7y2y6y7y9y16                                      | 1605.85 | 55.721  | 16019  | 3 | 535.95  | -8.51  |
| P0A1D3 CH60_SALTY 60 kDa chaperonin | 15 |                       | ATLEDLGQAK                                       | 311 | 10 | 5  | 41.25  | b9y3y7y8y10                                               | 1045.55 | 44.770  | 14396  | 2 | 523.28  | -5.49  |
| P0A1D3 CH60_SALTY 60 kDa chaperonin | 16 |                       | AVAAGMNPMDLKR                                    | 105 | 13 | 4  | 21.36  | b1b3b8y11                                                 | 1373.72 | 57.594  | 14202  | 3 | 458.58  | 14.04  |
| P0A1D3 CH60_SALTY 60 kDa chaperonin | 17 |                       | VGKEGVITVEDGTGLQDELDVVE GMQFDR                   | 168 | 29 | 6  | 26.03  | b4b13b14y4y11°y11                                         | 3135.49 | 76.934  | 2834   | 4 | 784.63  | -9.03  |
| P0A1D3 CH60_SALTY 60 kDa chaperonin | 18 |                       | LAGGVAVIK                                        | 371 | 9  | 4  | 46.61  | b6y4y7y8                                                  | 827.52  | 45.605  | 62044  | 2 | 414.26  | -17.92 |
| P0A1D3 CH60_SALTY 60 kDa chaperonin | 19 |                       | DTTTHIDGVGEEAAIQGR                               | 327 | 18 | 4  | 23.57  | b7°b7b8y9                                                 | 1845.91 | 100.248 | 40220  | 3 | 615.97  | -5.29  |
| P0A1D3 CH60_SALTY 60 kDa chaperonin | 20 |                       | LIAEAMDK                                         | 160 | 8  | 4  | 58.28  | y3y4y6y7                                                  | 890.45  | 39.681  | 22938  | 2 | 445.73  | -21.25 |
| P0A1D3 CH60_SALTY 60 kDa chaperonin | 21 |                       | GGDGNYGYNAAATEEYGNMIDMG ILDPTK                   | 470 | 28 | 3  | 23.03  | y3y4y7                                                    | 2966.34 | 89.050  | 22468  | 2 | 1483.67 | 20.00  |
| P0A1D3 CH60_SALTY 60 kDa chaperonin | 22 |                       | GYLSPYFINKPETGAVELESPFILL ADK                    | 197 | 28 | 4  | 22.22  | b11b12°b12y13                                             | 3111.67 | 102.684 | 5144   | 3 | 1037.89 | 12.08  |
| P0A1D3 CH60_SALTY 60 kDa chaperonin | 23 |                       | AAVEEGVVAGGGVALIR                                | 404 | 17 | 3  | 24.33  | b3b7b11                                                   | 1567.91 | 67.111  | 2384   | 3 | 523.31  | 20.79  |
| P0A1D3 CH60_SALTY 60 kDa chaperonin | 24 |                       | EIELEDKFENMGAMVK                                 | 58  | 17 | 10 | 97.75  | b9y5y6°y6y7y8y10y12y14 y15                                | 2010.94 | 73.979  | 107889 | 3 | 670.98  | -5.77  |
| P0A1D3 CH60_SALTY 60 kDa chaperonin | 25 |                       | NVVLDKSFGAPTITK                                  | 36  | 15 | 5  | 41.22  | b5y5y7y12y13                                              | 1589.87 | 58.648  | 41130  | 3 | 530.63  | -13.28 |
| P0A1D3 CH60_SALTY 60 kDa chaperonin | 26 |                       | GGDGNYGYNAAATEEYGNMIDMG ILDPTKVTR                | 470 | 31 | 3  | 17.33  | y3y6y23                                                   | 3322.52 | 87.217  | 39284  | 3 | 1108.18 | 6.76   |
| P0A1D3 CH60_SALTY 60 kDa chaperonin | 27 | Carbamidomethyl+C(16) | AVAAAVEELKALSVPSCDSK                             | 122 | 20 | 7  | 57.62  | b3y4y6y8y10y17y18                                         | 2045.04 | 72.687  | 37181  | 3 | 682.35  | -8.66  |
| P0A1D3 CH60_SALTY 60 kDa chaperonin | 28 |                       | AMLQDIATLTGGTVISEEIGMELE KATLEDLGQAK             | 286 | 35 | 22 | 166.84 | b3b4b5b6b7°b7°b7b8°b8b10y4y5y6y7°y7y10y16y21 y25y26y27y29 | 3675.89 | 122.604 | 33606  | 3 | 1225.97 | 6.51   |
| P0A1D3 CH60_SALTY 60 kDa chaperonin | 29 | Carbamidomethyl+C(13) | AMEAPLRQIVLNCGEEPSVVANT VK                       | 445 | 25 | 7  | 30.5   | b7b12b16y5°y5y10y13                                       | 2725.41 | 74.738  | 28903  | 3 | 909.14  | 4.48   |
| P0A1D3 CH60_SALTY 60 kDa chaperonin | 30 | Carbamidomethyl+C(6)  | QIVLNCGEEPSVVANTVKGGDGN YGYNAAATEEYGNMIDMGILDPTK | 452 | 46 | 3  | 16.44  | b11b14b25                                                 | 4904.32 | 83.842  | 12378  | 5 | 981.67  | 11.05  |
| P0A1D3 CH60_SALTY 60 kDa chaperonin | 31 |                       | ANDAAGDGT°TATVLAQSIITEGL KAVAAGMNPMDLK           | 80  | 37 | 9  | 26.18  | b3b11°b11y6°y6y8y9y12°y12                                 | 3616.83 | 132.353 | 7740   | 3 | 1206.28 | 3.17   |
| P0A1D3 CH60_SALTY 60 kDa chaperonin | 32 | Carbamidomethyl+C(6)  | ALSVPSCDSKAIAQVGTISANSDE TVGK                    | 132 | 28 | 4  | 17.94  | b12y12y14y24                                              | 2805.35 | 83.383  | 4510   | 4 | 702.09  | -13.92 |
| P0A1D3 CH60_SALTY 60 kDa chaperonin | 33 |                       | DTTTHIDGVGEEAAIQGRVAQIR                          | 327 | 23 | 4  | 23.58  | b4b5°b5b11                                                | 2413.28 | 55.750  | 3034   | 3 | 805.10  | 4.35   |
| P0A1D3 CH60_SALTY 60 kDa chaperonin | 34 |                       | IADLKGQNEQNVGIK                                  | 425 | 16 | 4  | 29.29  | b3y8y10y11                                                | 1741.91 | 82.318  | 2203   | 2 | 871.46  | 1.54   |
| P0A1D3 CH60_SALTY 60 kDa chaperonin | 35 | Oxidation+M()         | AVAAGMNPMDLKR                                    | 105 | 13 | 3  | 28.84  | y4y5y7                                                    | 1389.70 | 26.463  | 37697  | 3 | 463.90  | -1.05  |
| P0A1D3 CH60_SALTY 60 kDa chaperonin | 36 | Oxidation+M(9)        | VGAATEVEMKEK                                     | 380 | 12 | 8  | 72.08  | b3b5°b5b8°b8b10y8y10                                      | 1307.65 | 74.619  | 10192  | 3 | 436.55  | -4.11  |
| P0A1D3 CH60_SALTY 60 kDa chaperonin | 37 | Oxidation+M(22)       | EGVITVEDGTGLQDELDVVEGMQ FDR                      | 171 | 26 | 3  | 22.28  | b7b8y10                                                   | 2867.37 | 65.700  | 9090   | 3 | 956.46  | 13.88  |
| P0A1D3 CH60_SALTY 60 kDa chaperonin | 38 | Oxidation+M(2)        | EMLPVLEAVAK                                      | 231 | 11 | 3  | 28.09  | b6b7y7                                                    | 1215.65 | 64.556  | 7407   | 2 | 608.33  | -12.85 |
| P0A1D3 CH60_SALTY 60 kDa chaperonin | 39 | Oxidation+M(9)        | VGAATEVEMK                                       | 380 | 10 | 3  | 27.71  | b8y5y7                                                    | 1050.52 | 95.442  | 1523   | 1 | 1050.52 | 1.39   |

|                                              |    |                      |                                   |     |    |    |        |                                        |         |         |        |   |         |        |
|----------------------------------------------|----|----------------------|-----------------------------------|-----|----|----|--------|----------------------------------------|---------|---------|--------|---|---------|--------|
| [P0A1D3]CH60_SALTY 60 kDa chaperonin         | 40 |                      | EDALHATR                          | 396 | 8  | 0  | 1.51   |                                        | 912.45  | 26.674  | 24693  | 2 | 456.73  | -8.16  |
| [P0A1D3]CH60_SALTY 60 kDa chaperonin         | 41 |                      | AAAVEELK                          | 124 | 8  | 1  | 8.43   | b6                                     | 830.45  | 47.947  | 7466   | 1 | 830.45  | -11.32 |
| [P0A1D3]CH60_SALTY 60 kDa chaperonin         | 42 |                      | SFGAPTITKDGV                      | 42  | 12 | 0  | 4.14   |                                        | 1192.60 | 55.777  | 6593   | 2 | 596.81  | -14.33 |
| [P0A1D3]CH60_SALTY 60 kDa chaperonin         | 43 | Carbamidomethyl+C(4) | SVPCSDSK                          | 134 | 8  | 0  | 1.88   |                                        | 879.39  | 35.925  | 1509   | 1 | 879.39  | 6.73   |
| [P0A1D3]CH60_SALTY 60 kDa chaperonin         | 44 |                      | EMLPVLEAVAK                       | 231 | 11 | 0  | 2.26   |                                        | 1181.64 | 80.664  | 5662   | 2 | 591.33  | -9.81  |
| [P0A297]RL10_SALTY 50S ribosomal protein L10 | 1  |                      | LATLPTYEEAIAR                     | 125 | 13 | 11 | 75.99  | b2b3*b3b4*b4b8y8y10y11y13              | 1447.78 | 65.910  | 75403  | 2 | 724.39  | 0.67   |
| [P0A297]RL10_SALTY 50S ribosomal protein L10 | 2  | Carbamidomethyl+C(9) | VVEGTQFECLKDTFVGPTLIAYSM EHPGAAAR | 62  | 32 | 5  | 16.38  | b10y13y17y30y32                        | 3494.70 | 92.843  | 54063  | 4 | 874.43  | -2.24  |
| [P0A297]RL10_SALTY 50S ribosomal protein L10 | 3  |                      | AAAFEGELIPASQIDR                  | 109 | 16 | 9  | 75.09  | b5b9y5y7y8y9y11y12y16                  | 1687.88 | 69.397  | 53448  | 2 | 844.44  | 7.23   |
| [P0A297]RL10_SALTY 50S ribosomal protein L10 | 4  |                      | GALSAVVADSR                       | 20  | 11 | 10 | 72.67  | b3b11y4y5y6*y6y7y8*y8y11               | 1045.57 | 48.842  | 42907  | 2 | 523.29  | 7.71   |
| [P0A297]RL10_SALTY 50S ribosomal protein L10 | 5  |                      | QAIVAEVSEVAK                      | 8   | 12 | 6  | 23.03  | b2b9*b9b12y8y10                        | 1243.69 | 57.968  | 17033  | 2 | 622.35  | -2.36  |
| [P0A297]RL10_SALTY 50S ribosomal protein L10 | 6  |                      | LMATMK                            | 138 | 6  | 1  | 13.91  | b4                                     | 694.37  | 41.470  | 15439  | 1 | 694.37  | 12.66  |
| [P0A297]RL10_SALTY 50S ribosomal protein L10 | 7  |                      | DTFVGPTLIAYSM EHPGAAAR            | 73  | 21 | 3  | 14.38  | b10b12y11                              | 2204.10 | 68.335  | 7348   | 3 | 735.37  | 8.64   |
| [P0A297]RL10_SALTY 50S ribosomal protein L10 | 8  |                      | GVTVDK                            | 31  | 6  | 1  | 13.91  | b5                                     | 618.35  | 72.036  | 2123   | 1 | 618.35  | 8.69   |
| [P0A297]RL10_SALTY 50S ribosomal protein L10 | 9  | Carbamidomethyl+C(9) | VVEGTQFECLK                       | 62  | 11 | 3  | 25.08  | b9y4y7                                 | 1309.67 | 68.425  | 2018   | 2 | 655.34  | 16.87  |
| [P0A297]RL10_SALTY 50S ribosomal protein L10 | 10 |                      | EAGVYMR                           | 46  | 7  | 3  | 38.34  | b5b6y6                                 | 825.39  | 74.649  | 1755   | 1 | 825.39  | -4.07  |
| [P0A297]RL10_SALTY 50S ribosomal protein L10 | 11 |                      | LATLPTYEEAIARLMATMK               | 125 | 19 | 5  | 21.57  | b5b8y6y18*y18                          | 2123.10 | 58.532  | 232897 | 3 | 708.37  | -11.15 |
| [P0A297]RL10_SALTY 50S ribosomal protein L10 | 12 |                      | AAAFEGELIPASQIDRLATLPTYEE AIAR    | 109 | 29 | 7  | 45.67  | b4b5b6b10y4y9y20                       | 3116.65 | 93.504  | 29276  | 3 | 1039.55 | 6.19   |
| [P0A297]RL10_SALTY 50S ribosomal protein L10 | 13 |                      | ALNLQDKQAIVA EVSEVAK              | 1   | 19 | 5  | 32.46  | y3y5y8*y8y9                            | 2026.10 | 72.053  | 27306  | 3 | 676.04  | -9.22  |
| [P0A297]RL10_SALTY 50S ribosomal protein L10 | 14 | Oxidation+M(9)       | AGREAGVYMR                        | 43  | 10 | 4  | 42.22  | b7b8y5y7                               | 1125.56 | 42.406  | 9372   | 2 | 563.28  | 13.12  |
| [P0A297]RL10_SALTY 50S ribosomal protein L10 | 15 | Oxidation+M(2)       | LMATMK EASAGK                     | 138 | 12 | 3  | 27.01  | b9y9y10                                | 1253.64 | 51.349  | 2198   | 3 | 418.55  | 14.51  |
| [P0A297]RL10_SALTY 50S ribosomal protein L10 | 16 |                      | IAYSMEHPGAAAR                     | 81  | 13 | 0  | 10.17  |                                        | 1373.68 | 92.869  | 2938   | 2 | 687.34  | 11.91  |
| [P66038]RISB_SALTY 6                         | 1  |                      | IGQVKDDNITVVWVPGAYELPLA TEALAK    | 40  | 29 | 15 | 82.92  | b3b8b9*b9b12b13b14b20y2y3y4y9y12y15y29 | 3110.69 | 98.952  | 87079  | 3 | 1037.57 | 3.69   |
| [P66038]RISB_SALTY 6                         | 2  |                      | FNQFINDSLLDGAVDALTR               | 21  | 19 | 15 | 133.46 | b2b3b8b9y4y5y6y8y9y10y13*y13y14y15y19  | 2109.08 | 101.780 | 61551  | 2 | 1055.04 | 9.72   |
| [P66038]RISB_SALTY 6                         | 3  |                      | GAEAALTALEMINVLK                  | 136 | 16 | 7  | 36.71  | b4b5b7b16y1y4y10                       | 1643.91 | 103.442 | 28899  | 2 | 822.46  | 1.49   |
| [P66038]RISB_SALTY 6                         | 4  |                      | ANVAAPDAR                         | 5   | 9  | 6  | 39.1   | b2*b2y3y5y6y9                          | 884.45  | 23.575  | 9085   | 2 | 442.73  | -9.18  |
| [P66038]RISB_SALTY 6                         | 5  |                      | NI IK                             | 1   | 4  | 1  | 13.16  | y3                                     | 487.32  | 37.877  | 11641  | 1 | 487.32  | -6.45  |
| [P66038]RISB_SALTY 6                         | 6  |                      | VAIT IAR                          | 14  | 7  | 3  | 41.35  | y4y5y6                                 | 743.47  | 44.807  | 9192   | 2 | 372.24  | -16.58 |
| [P66038]RISB_SALTY 6                         | 7  |                      | AGNKGAEAA LTALEMINVLK             | 132 | 20 | 9  | 89.72  | b5b7b8b9b16y3y4y5y6                    | 2014.08 | 97.577  | 54364  | 3 | 672.03  | -9.45  |
| [P66932]TIG_SALTY Trigger factor             | 1  |                      | NVALEEQA VEAVLAK                  | 399 | 15 | 12 | 99.22  | b2b3b7y1y3y4y5y7y11y12y13y15           | 1583.87 | 80.775  | 53273  | 2 | 792.44  | 1.39   |
| [P66932]TIG_SALTY Trigger factor             | 2  |                      | ANDIDVPSALIDSEIDVLRR              | 296 | 20 | 8  | 28.73  | b2*b2b3b4y1y14y16y20                   | 2211.15 | 91.139  | 31309  | 3 | 737.72  | -4.31  |

|                                 |    |                |                                   |     |    |    |       |                                                           |         |        |        |   |         |        |
|---------------------------------|----|----------------|-----------------------------------|-----|----|----|-------|-----------------------------------------------------------|---------|--------|--------|---|---------|--------|
| P66932 TIG_SALTY Trigger factor | 3  |                | SQAIEGLVK                         | 287 | 9  | 7  | 31.32 | b2*b2b5y1y7y8y9                                           | 944.53  | 47.917 | 30417  | 2 | 472.77  | -7.69  |
| P66932 TIG_SALTY Trigger factor | 4  |                | FGVEDGSVAGLR                      | 255 | 12 | 7  | 30.23 | b2y1y2y3y8y9y12                                           | 1206.61 | 58.000 | 14422  | 2 | 603.81  | 1.32   |
| P66932 TIG_SALTY Trigger factor | 5  |                | ANDIDVPSALIDSEIDVLR               | 296 | 19 | 14 | 70.61 | b2b4*b4b5b6*b6b7*b7b11<br>*b11b13y3y13y19                 | 2055.07 | 95.250 | 9842   | 2 | 1028.04 | 4.99   |
| P66932 TIG_SALTY Trigger factor | 6  |                | NKELMDNMR                         | 390 | 9  | 6  | 66.17 | b3y3y4y6y7y9                                              | 1150.54 | 35.613 | 7801   | 2 | 575.77  | 2.97   |
| P66932 TIG_SALTY Trigger factor | 7  |                | ATSFNELMNQQA                      | 420 | 12 | 3  | 33.24 | b3b5b8                                                    | 1353.60 | 50.717 | 6099   | 3 | 451.87  | -9.11  |
| P66932 TIG_SALTY Trigger factor | 8  |                | GLIEEMASAYEDPKEVIEFYSK            | 368 | 22 | 6  | 36.81 | b5b7b10b19y6y12                                           | 2548.25 | 83.377 | 4719   | 4 | 637.82  | 11.88  |
| P66932 TIG_SALTY Trigger factor | 9  |                | ATDFVLAMGQGR                      | 181 | 12 | 5  | 35.31 | b5b6b8y5y12                                               | 1265.65 | 94.463 | 3764   | 2 | 633.33  | 13.70  |
| P66932 TIG_SALTY Trigger factor | 10 |                | AEVR                              | 267 | 4  | 1  | 13.16 | b3                                                        | 474.26  | 30.774 | 7875   | 1 | 474.26  | -8.56  |
| P66932 TIG_SALTY Trigger factor | 11 |                | YGASVR                            | 57  | 6  | 2  | 27.44 | b3b4                                                      | 652.34  | 27.468 | 6504   | 1 | 652.34  | -7.67  |
| P66932 TIG_SALTY Trigger factor | 12 |                | MQVSVETTQGLGR                     | 0   | 13 | 7  | 56.22 | b3b11y6*y6y7y9y11                                         | 1405.72 | 59.287 | 3178   | 2 | 703.36  | 5.21   |
| P66932 TIG_SALTY Trigger factor | 13 |                | INPAGAPNYVPGEYK                   | 83  | 15 | 4  | 26.89 | b8b9*b9b12                                                | 1589.79 | 52.240 | 3065   | 3 | 530.60  | -2.69  |
| P66932 TIG_SALTY Trigger factor | 14 |                | VTITIAADSIETAVK                   | 14  | 15 | 4  | 49.45 | b8b9b10b11                                                | 1531.82 | 76.929 | 2272   | 2 | 766.42  | -21.83 |
| P66932 TIG_SALTY Trigger factor | 15 |                | ANDIDVPSALIDSEIDVLR               | 296 | 20 | 3  | 24.32 | b10b13b14                                                 | 2211.15 | 91.029 | 18938  | 2 | 1106.08 | -7.51  |
| P66932 TIG_SALTY Trigger factor | 16 |                | YGASVRQDVLGDLMSR                  | 57  | 16 | 3  | 24.33 | b8b9y3                                                    | 1766.88 | 70.807 | 9515   | 3 | 589.63  | -5.73  |
| P66932 TIG_SALTY Trigger factor | 17 |                | AGEEFTIDVTFPEEYHAENLK GK          | 206 | 23 | 3  | 19.9  | b7b9b11                                                   | 2624.28 | 62.582 | 8860   | 3 | 875.43  | 10.98  |
| P66932 TIG_SALTY Trigger factor | 18 |                | VKGLIEEMASAYEDPK                  | 366 | 16 | 3  | 17.8  | b12y6y11                                                  | 1779.86 | 70.783 | 7832   | 3 | 593.96  | -12.89 |
| P66932 TIG_SALTY Trigger factor | 19 |                | RFGVEDGSVAGLR                     | 254 | 13 | 3  | 21.36 | b10y7y10                                                  | 1362.70 | 49.770 | 5551   | 3 | 454.91  | -6.27  |
| P66932 TIG_SALTY Trigger factor | 20 |                | GHKAGEEFTIDVTFPEEYHAENLK          | 203 | 24 | 3  | 35.45 | b10b11b12                                                 | 2761.30 | 74.628 | 4196   | 3 | 921.11  | -1.95  |
| P66932 TIG_SALTY Trigger factor | 21 | Oxidation+M(6) | GLIEEMASAYEDPKEVIEFYSK            | 368 | 22 | 4  | 18.96 | b3b6y11y13                                                | 2564.25 | 82.680 | 2828   | 2 | 1282.63 | 14.76  |
| P66932 TIG_SALTY Trigger factor | 22 |                | SQAIEGL                           | 287 | 7  | 0  | 1.51  |                                                           | 717.38  | 47.865 | 6169   | 1 | 717.38  | 3.15   |
| P66932 TIG_SALTY Trigger factor | 23 |                | ANDIDVPSALIDSEI                   | 296 | 15 | 3  | 13.42 | y3*y3y13                                                  | 1571.78 | 95.274 | 2313   | 2 | 786.39  | 0.78   |
| Q8ZQT5 TOLB_SALTY Protein tolB  | 1  |                | SNNTEPTWFPDSQTLAFTSDQAG<br>RPQVYK | 287 | 29 | 12 | 46.31 | b2b5*b5y2y9y13*y13y21y<br>22y24y25y29                     | 3285.57 | 78.297 | 102913 | 3 | 1095.86 | 7.06   |
| Q8ZQT5 TOLB_SALTY Protein tolB  | 2  |                | VSDYDGYNQFVVHR                    | 183 | 14 | 9  | 90.35 | y2y4y5y6y7y9y10y12y14                                     | 1698.76 | 54.492 | 86488  | 3 | 566.93  | -14.80 |
| Q8ZQT5 TOLB_SALTY Protein tolB  | 3  |                | WAGPGAAPEDIGGIVAADLR              | 43  | 20 | 9  | 63.06 | b7y2y5y9y12y13y14y15y2<br>0                               | 1936.00 | 86.119 | 52305  | 2 | 968.50  | 2.33   |
| Q8ZQT5 TOLB_SALTY Protein tolB  | 4  |                | IAYVVQTNGGQFPYELR                 | 166 | 17 | 18 | 96.51 | b3b9b12y1y2y3y5*y5y6*y6<br>y8y11*y11y12*y12y13*y13<br>y17 | 1955.02 | 74.077 | 50348  | 2 | 978.01  | 9.12   |
| Q8ZQT5 TOLB_SALTY Protein tolB  | 5  |                | YAGHTASDEVFEK                     | 142 | 13 | 6  | 35.11 | b6y4y6y9*y9y13                                            | 1453.64 | 37.731 | 49708  | 3 | 485.22  | -10.83 |
| Q8ZQT5 TOLB_SALTY Protein tolB  | 6  |                | IEITQGVDSARPIGVVPPK               | 24  | 19 | 11 | 53.62 | b2b8b9b11y2y3y12y16*y1<br>6y18y19                         | 2026.12 | 71.186 | 47379  | 3 | 676.04  | -6.63  |
| Q8ZQT5 TOLB_SALTY Protein tolB  | 7  |                | SPQPLMSPAWSPDGSK                  | 197 | 16 | 6  | 42.95 | b8y3y5y10y13y16                                           | 1684.81 | 63.370 | 44462  | 2 | 842.91  | 8.69   |
| Q8ZQT5 TOLB_SALTY Protein tolB  | 8  |                | LAYVTFESGR                        | 213 | 10 | 5  | 34.7  | b2y4y5y8y10                                               | 1142.58 | 58.284 | 42839  | 2 | 571.79  | -3.21  |

|                                  |    |                   |                                                          |     |    |    |        |                                 |         |         |       |   |        |        |
|----------------------------------|----|-------------------|----------------------------------------------------------|-----|----|----|--------|---------------------------------|---------|---------|-------|---|--------|--------|
| Q8ZQT5 TOLB_SALTY Protein tolB   | 9  |                   | TGSLNLYVMDLASGQIR                                        | 264 | 17 | 5  | 23.85  | b6b14y5y11y17                   | 1837.96 | 90.096  | 37886 | 2 | 919.48 | 5.38   |
| Q8ZQT5 TOLB_SALTY Protein tolB   | 10 |                   | SALVIQTLANGAVR                                           | 223 | 14 | 9  | 76.09  | b3b4y2y5y6y8y9y10y14            | 1412.82 | 71.531  | 35915 | 2 | 706.91 | 0.35   |
| Q8ZQT5 TOLB_SALTY Protein tolB   | 11 |                   | MNINGGAAQR                                               | 316 | 10 | 13 | 74.06  | b2*b2b3*b3b4b10y1y6y7*y7y8y9y10 | 1031.50 | 28.595  | 35225 | 2 | 516.25 | -5.80  |
| Q8ZQT5 TOLB_SALTY Protein tolB   | 12 |                   | HNGAPAFSPDGTK                                            | 244 | 13 | 4  | 40.34  | b3y4y5y6                        | 1298.62 | 67.881  | 7884  | 2 | 649.81 | 4.98   |
| Q8ZQT5 TOLB_SALTY Protein tolB   | 13 |                   | ITWEGSQNQDADVSSDGK                                       | 326 | 18 | 3  | 16.16  | b5y3y11                         | 1936.82 | 56.922  | 2958  | 2 | 968.91 | -17.33 |
| Q8ZQT5 TOLB_SALTY Protein tolB   | 14 |                   | IEITQGVSARPIGVVPFKWAGPG<br>AAPEDIGGIVAADLR               | 24  | 39 | 9  | 29.92  | b9°b9b16°b16y3y5y6y9y13         | 3943.09 | 95.360  | 65773 | 4 | 986.53 | -4.58  |
| Q8ZQT5 TOLB_SALTY Protein tolB   | 15 |                   | SPQPLMSPAWSPDGSKLAYVTFES<br>GR                           | 197 | 26 | 11 | 77.45  | b5b24y4y5y8y9°y9y13y15y23y24    | 2808.39 | 81.699  | 32047 | 3 | 936.80 | 7.48   |
| Q8ZQT5 TOLB_SALTY Protein tolB   | 16 |                   | NSGKFNPLDR                                               | 63  | 10 | 6  | 59.55  | b9y4y5*y5y6y8                   | 1147.58 | 41.743  | 21401 | 2 | 574.29 | -3.40  |
| Q8ZQT5 TOLB_SALTY Protein tolB   | 17 |                   | ARLPATDGQVK                                              | 411 | 11 | 9  | 119.29 | b3b4b5b7b9y6y7y8y9              | 1155.64 | 29.783  | 13579 | 2 | 578.32 | -6.34  |
| Q8ZQT5 TOLB_SALTY Protein tolB   | 18 |                   | HNGAPAFSPDGTKLAFALSK                                     | 244 | 20 | 4  | 23.46  | b5b9b16y12                      | 2029.07 | 62.040  | 13531 | 3 | 677.03 | 8.36   |
| Q8ZQT5 TOLB_SALTY Protein tolB   | 19 |                   | VSDYDGYNQFVVHRSPQPLMSPA<br>WSPDGSK                       | 183 | 30 | 4  | 25.34  | b3b4y3y8                        | 3364.57 | 70.693  | 4599  | 4 | 841.90 | -0.94  |
| Q8ZQT5 TOLB_SALTY Protein tolB   | 20 |                   | LPATDGQVKSPAWSPYL                                        | 413 | 17 | 3  | 16.93  | b6y6y12                         | 1829.94 | 91.169  | 3144  | 3 | 610.65 | -0.07  |
| Q8ZQT5 TOLB_SALTY Protein tolB   | 21 |                   | QVASFPRHNGAPAFSPDGTK                                     | 237 | 20 | 4  | 14.9   | b13y5y8°y8                      | 2084.06 | 113.098 | 1923  | 3 | 695.36 | 12.53  |
| Q8ZQT5 TOLB_SALTY Protein tolB   | 22 |                   | TGSLNLYVMDLASGQIRQITDGR                                  | 264 | 23 | 6  | 37.69  | b5b12*b12b13*b13b14             | 2508.29 | 80.598  | 1813  | 3 | 836.77 | 1.65   |
| Q8ZQT5 TOLB_SALTY Protein tolB   | 23 | Phosphoryl STY(9) | IEITQGVDSARPIGVVPFK                                      | 24  | 19 | 3  | 24.67  | b7b8b12                         | 2106.06 | 59.234  | 2470  | 4 | 527.27 | -13.91 |
| Q8ZQT5 TOLB_SALTY Protein tolB   | 24 | Oxidation+M()     | QDLVTGGVQVLSSTFLDETPLAP<br>NGTMVIYSSSQGMGSVLNLVSTD<br>GR | 360 | 49 | 4  | 24.41  | b7*b7b8y4                       | 5044.41 | 74.744  | 17735 | 6 | 841.58 | -12.39 |
| Q8ZQT5 TOLB_SALTY Protein tolB   | 25 | Oxidation+M(9)    | TGSLNLYVMDLASGQIR                                        | 264 | 17 | 4  | 16.93  | b9°b9b11y6                      | 1853.92 | 55.702  | 1747  | 3 | 618.64 | -11.98 |
| Q8ZQT5 TOLB_SALTY Protein tolB   | 26 |                   | VIQTLANGAVR                                              | 226 | 11 | 1  | 7.38   | b3                              | 1141.65 | 71.524  | 19068 | 2 | 571.33 | -12.62 |
| Q8ZQT5 TOLB_SALTY Protein tolB   | 27 |                   | DYDGYNQFVVHR                                             | 185 | 12 | 0  | 3.39   |                                 | 1512.71 | 54.527  | 3014  | 2 | 756.86 | 14.69  |
| Q8ZQT5 TOLB_SALTY Protein tolB   | 28 |                   | TGSLNLYVMDLASGQIR                                        | 264 | 17 | 0  | 4.52   |                                 | 1819.95 | 90.137  | 8105  | 2 | 910.48 | 7.91   |
| Q7CR87 SURA_SALTY Chaperone surA | 1  |                   | IQELPGIFAQALSTAK                                         | 235 | 16 | 8  | 38.32  | b2b3*b3b4*y12y13y14y16          | 1686.95 | 90.573  | 76255 | 2 | 843.98 | 3.47   |
| Q7CR87 SURA_SALTY Chaperone surA | 2  |                   | ITVLPQEVDALAK                                            | 149 | 13 | 9  | 68.78  | b3°b3b4y2y8y9y10y11y13          | 1396.81 | 71.352  | 63595 | 2 | 698.91 | 1.92   |
| Q7CR87 SURA_SALTY Chaperone surA | 3  |                   | LIMDQIILQMGGK                                            | 73  | 13 | 7  | 69.17  | b6y3y4y5y6y7y13                 | 1530.84 | 88.692  | 52920 | 2 | 765.92 | 2.79   |
| Q7CR87 SURA_SALTY Chaperone surA | 4  |                   | ITDEQLDQAIANIAK                                          | 90  | 15 | 10 | 65.16  | b7b10*b10y4y5y6y9y13y15*y15     | 1642.88 | 81.050  | 51253 | 2 | 821.94 | 6.46   |
| Q7CR87 SURA_SALTY Chaperone surA | 5  |                   | LAYDGLNYSTYR                                             | 117 | 12 | 6  | 51.06  | b5y2y3y5y6y8                    | 1435.69 | 59.204  | 50828 | 2 | 718.35 | 6.04   |
| Q7CR87 SURA_SALTY Chaperone surA | 6  |                   | GQISAPVHSSFGWHLIELLDTR                                   | 362 | 22 | 11 | 30.06  | b2*b2b4°b4°b4b5b13y2y3y17y22    | 2463.25 | 94.095  | 39907 | 4 | 616.57 | -12.09 |
| Q7CR87 SURA_SALTY Chaperone surA | 7  |                   | LNAGQAGQQLPDDATLR                                        | 50  | 17 | 9  | 72.17  | b4b7y3y4y6y7y9y12y17            | 1767.90 | 51.658  | 37175 | 2 | 884.46 | 3.04   |
| Q7CR87 SURA_SALTY Chaperone surA | 8  |                   | QAESIVEEAR                                               | 197 | 10 | 4  | 34.7   | y4y5y8y10                       | 1131.56 | 38.773  | 29120 | 2 | 566.28 | -3.56  |
| Q7CR87 SURA_SALTY Chaperone surA | 9  |                   | HILLKPSPIMNDQQAR                                         | 288 | 16 | 5  | 17.8   | b2b3y4*y4y8                     | 1861.00 | 49.730  | 23470 | 3 | 621.00 | -7.74  |

|                                           |    |                       |                                        |     |    |    |       |                                                  |         |         |       |   |         |        |
|-------------------------------------------|----|-----------------------|----------------------------------------|-----|----|----|-------|--------------------------------------------------|---------|---------|-------|---|---------|--------|
| Q7CR87 SURA_SALTY Chaperone surA          | 10 |                       | QIGTQNDASTELNLSHILALPENP<br>TSEQVNDAGR | 162 | 35 | 10 | 23.98 | b9b12°b12y1y3*y3y5y9y1<br>4y35                   | 3816.93 | 89.385  | 21527 | 3 | 1272.98 | 7.74   |
| Q7CR87 SURA_SALTY Chaperone surA          | 11 |                       | GQSQSISVTEVHAR                         | 274 | 14 | 6  | 42.75 | y2y6y7y8y10y14                                   | 1498.74 | 37.469  | 16559 | 3 | 500.25  | -14.09 |
| Q7CR87 SURA_SALTY Chaperone surA          | 12 |                       | VAAVVNNGVVLESDVDGLMQSV<br>K            | 27  | 23 | 10 | 55.22 | b2b3b4b15y3y5y7y8y12y2<br>3                      | 2343.25 | 91.687  | 8115  | 2 | 1172.13 | 13.23  |
| Q7CR87 SURA_SALTY Chaperone surA          | 13 |                       | LAITYSADQQALK                          | 214 | 13 | 5  | 21.36 | b2b9y7y10y13                                     | 1421.76 | 55.372  | 5503  | 2 | 711.38  | -1.46  |
| Q7CR87 SURA_SALTY Chaperone surA          | 14 |                       | EMIIEVR                                | 134 | 8  | 3  | 41.73 | y4y5y6                                           | 976.51  | 53.911  | 34754 | 2 | 488.76  | -0.31  |
| Q7CR87 SURA_SALTY Chaperone surA          | 15 |                       | HQILER                                 | 67  | 6  | 3  | 27.44 | b3*b3y4                                          | 795.44  | 25.729  | 19890 | 2 | 398.22  | -8.21  |
| Q7CR87 SURA_SALTY Chaperone surA          | 16 |                       | GGQMGWGR                               | 227 | 8  | 3  | 33.95 | b5y4y5                                           | 848.37  | 35.031  | 5681  | 2 | 424.69  | -12.59 |
| Q7CR87 SURA_SALTY Chaperone surA          | 17 |                       | TDAAQK                                 | 388 | 6  | 2  | 13.91 | y4*y4                                            | 633.33  | 33.353  | 2640  | 1 | 633.33  | 8.96   |
| Q7CR87 SURA_SALTY Chaperone surA          | 18 |                       | LAITYSADQQALKGGQMGWGR                  | 214 | 21 | 10 | 73.68 | b10°b10*b10y4y5y8y9y10<br>y11y18                 | 2251.12 | 65.804  | 33428 | 3 | 751.05  | -3.04  |
| Q7CR87 SURA_SALTY Chaperone surA          | 19 |                       | QAESIVEEARNGADFGK                      | 197 | 17 | 5  | 28.32 | b4b5b9°b9y6                                      | 1820.90 | 36.616  | 1893  | 5 | 364.99  | 12.20  |
| Q7CR87 SURA_SALTY Chaperone surA          | 20 | Phosphoryl STY(27)    | QIGTQNDASTELNLSHILALPENP<br>TSEQVNDAGR | 162 | 35 | 9  | 35.56 | b3b4°b4*b4b6°b6y7*y7y8                           | 3896.89 | 114.869 | 1696  | 4 | 974.98  | 8.40   |
| Q7CR87 SURA_SALTY Chaperone surA          | 21 |                       | GQSQSISVTEVHAR                         | 274 | 14 | 0  | 3.39  |                                                  | 1481.72 | 37.481  | 1530  | 3 | 494.58  | -3.95  |
| P0A1P6 GLNA_SALTY Glutamine<br>synthetase | 1  |                       | EIPQVAGSLEEALNALDLDR                   | 406 | 20 | 15 | 51.51 | b4°b4b7*b7b11*b11b15y1<br>y6°y6y14y15°y15*y15y20 | 2153.10 | 96.454  | 50663 | 3 | 718.37  | -2.27  |
| P0A1P6 GLNA_SALTY Glutamine<br>synthetase | 2  |                       | SAEHVLTMLNEHEVK                        | 1   | 15 | 11 | 97.58 | b4b5b9b10y4y6y7y8*y8y9<br>y15                    | 1736.84 | 55.530  | 26927 | 3 | 579.62  | -13.71 |
| P0A1P6 GLNA_SALTY Glutamine<br>synthetase | 3  |                       | LVPGYEAPVMLAYSAR                       | 322 | 16 | 8  | 53.47 | b15y4y5°y5y9y11y14°y14                           | 1736.91 | 78.279  | 24987 | 2 | 868.96  | 6.04   |
| P0A1P6 GLNA_SALTY Glutamine<br>synthetase | 4  |                       | AINALANPTTNSYKR                        | 307 | 15 | 16 | 74.19 | b2b3*b3b4*b4y7°y7y8°y8*<br>y8y9*y9y10*y10y13y15  | 1633.85 | 43.355  | 24241 | 3 | 545.29  | -10.01 |
| P0A1P6 GLNA_SALTY Glutamine<br>synthetase | 5  | Carbamidomethyl+C(1)  | CDILEPGTLQGYDRDPR                      | 89  | 17 | 9  | 23.85 | b2b3b11y2y9°y9*y9y11°y1<br>1                     | 2004.95 | 60.690  | 23142 | 3 | 668.99  | 0.49   |
| P0A1P6 GLNA_SALTY Glutamine<br>synthetase | 6  |                       | GGYFPVPPVDSAQDIR                       | 177 | 16 | 5  | 25.21 | b3b5y2y8y12                                      | 1717.87 | 70.845  | 12328 | 2 | 859.44  | 10.80  |
| P0A1P6 GLNA_SALTY Glutamine<br>synthetase | 7  |                       | GINESDMVLPMDASTAVIDPFFAD<br>STLIIR     | 59  | 30 | 5  | 17.09 | b11y6y11y13y30                                   | 3238.63 | 114.118 | 6880  | 3 | 1080.21 | 7.69   |
| P0A1P6 GLNA_SALTY Glutamine<br>synthetase | 8  |                       | ATGIADTVLFGPEPEFFLFDDIR                | 117 | 23 | 9  | 42.42 | b2b3y2y3y5y8y10°y10y13                           | 2570.27 | 117.747 | 5724  | 3 | 857.43  | -5.13  |
| P0A1P6 GLNA_SALTY Glutamine<br>synthetase | 9  |                       | FGASISGSHVAIDDIEGAWNSSTK               | 140 | 24 | 3  | 13.12 | b14y7y12                                         | 2449.16 | 76.875  | 2655  | 3 | 817.06  | 0.20   |
| P0A1P6 GLNA_SALTY Glutamine<br>synthetase | 10 |                       | IHPGEAMDK                              | 386 | 9  | 4  | 46.61 | b7y5y7y8                                         | 997.47  | 37.295  | 2133  | 2 | 499.24  | -7.59  |
| P0A1P6 GLNA_SALTY Glutamine<br>synthetase | 11 |                       | AGGVFTDEAIDAYIALR                      | 430 | 17 | 5  | 37.86 | b5b6°b6b7y12                                     | 1781.88 | 77.180  | 69779 | 2 | 891.44  | -16.58 |
| P0A1P6 GLNA_SALTY Glutamine<br>synthetase | 12 |                       | MSAEHVLTMLNEHEVK                       | 0   | 16 | 3  | 17.8  | b7b12y4                                          | 1867.89 | 81.472  | 51769 | 3 | 623.30  | -6.80  |
| P0A1P6 GLNA_SALTY Glutamine<br>synthetase | 13 |                       | MTPHPVEFELYYSV                         | 455 | 14 | 4  | 25.42 | b7°b7y5y6                                        | 1711.83 | 49.879  | 13259 | 2 | 856.42  | 15.97  |
| P0A1P6 GLNA_SALTY Glutamine<br>synthetase | 14 |                       | NLYDLPPEEAK                            | 395 | 11 | 3  | 32.07 | y5y6y9                                           | 1288.66 | 65.398  | 13227 | 2 | 644.84  | 17.52  |
| P0A1P6 GLNA_SALTY Glutamine<br>synthetase | 15 | Carbamidomethyl+C(11) | FPDPAANPYLCFAALLMAGLDGIK               | 360 | 24 | 6  | 39.67 | b7b15b16y3y15y16                                 | 2565.33 | 136.686 | 6140  | 2 | 1283.17 | 16.75  |
| P0A1P6 GLNA_SALTY Glutamine<br>synthetase | 16 |                       | EQHVTIPAHQVNAEFFEEGK                   | 28  | 20 | 3  | 14.9  | b13b19y6                                         | 2310.15 | 107.762 | 4902  | 2 | 1155.58 | 14.37  |



|                                           |    |                                          |                                 |     |    |    |        |                                                       |         |         |        |   |         |        |
|-------------------------------------------|----|------------------------------------------|---------------------------------|-----|----|----|--------|-------------------------------------------------------|---------|---------|--------|---|---------|--------|
| P0A1P6 GLNA_SALTY Glutamine synthetase    | 17 |                                          | AINALANPTTNSYK                  | 307 | 14 | 3  | 28.55  | y3y7y9                                                | 1477.77 | 48.671  | 3895   | 2 | 739.39  | 2.07   |
| P0A1P6 GLNA_SALTY Glutamine synthetase    | 18 |                                          | FNTMTK                          | 225 | 6  | 1  | 13.91  | y4                                                    | 741.36  | 109.830 | 2705   | 1 | 741.36  | 4.86   |
| P0A1P6 GLNA_SALTY Glutamine synthetase    | 19 | Carbamidomethyl+C(1)                     | CDILEPGTLQGYDR                  | 89  | 14 | 5  | 19.98  | b5y6°y6y12*y12                                        | 1636.79 | 61.326  | 1938   | 3 | 546.27  | 14.32  |
| P0A1P6 GLNA_SALTY Glutamine synthetase    | 20 |                                          | FGASISGSHVAIDIEGAWNSSTK YEGGNK  | 140 | 30 | 4  | 25.34  | b9b10y5y12                                            | 3097.46 | 53.096  | 61999  | 3 | 1033.16 | 2.84   |
| P0A1P6 GLNA_SALTY Glutamine synthetase    | 21 | Carbamidomethyl+C(11)                    | FPDPAANPYLCFAALLMAGLDGIK NK     | 360 | 26 | 5  | 27.5   | b4b10b13b20y15                                        | 2807.41 | 100.229 | 6993   | 3 | 936.47  | -6.35  |
| P0A1P6 GLNA_SALTY Glutamine synthetase    | 22 | Carbamidomethyl+C(22)                    | FGKTATFMPKPMFGDNGSGMHCHMSLAK    | 249 | 28 | 6  | 39.47  | b12b18y6y7y8°y8                                       | 3085.43 | 133.435 | 5857   | 4 | 772.11  | 11.08  |
| P0A1P6 GLNA_SALTY Glutamine synthetase    | 23 |                                          | AEDYL RATGIADTVLFGPEPEFFLFD DIR | 111 | 29 | 3  | 11.81  | b6y9y11                                               | 3317.60 | 97.968  | 4466   | 4 | 830.16  | -9.64  |
| P0A1P6 GLNA_SALTY Glutamine synthetase    | 24 | Carbamidomethyl+C(1)                     | CDILEPGTLQGYDRDPR               | 89  | 17 | 3  | 16.93  | b9y3y8                                                | 2004.93 | 59.049  | 2279   | 3 | 668.98  | -9.13  |
| P0A1P6 GLNA_SALTY Glutamine synthetase    | 25 | Carbamidomethyl+C(1); Phosphoryl STY(12) | CDILEPGTLQGYDRDPR               | 89  | 17 | 3  | 16.93  | b3b11y5                                               | 2084.92 | 59.787  | 10766  | 4 | 521.98  | 7.49   |
| P0A1P6 GLNA_SALTY Glutamine synthetase    | 26 |                                          | NALANPTTNSYKR                   | 309 | 13 | 0  | 3.77   |                                                       | 1449.74 | 43.339  | 2438   | 2 | 725.37  | -2.11  |
| P66313 RL6_SALTY 50S ribosomal protein L6 | 1  |                                          | APVVVPAGVDVK                    | 6   | 12 | 12 | 130.99 | b2b3b4b5y3y5y6y7y8y9y10y12                            | 1150.68 | 54.035  | 72276  | 2 | 575.84  | -4.46  |
| P66313 RL6_SALTY 50S ribosomal protein L6 | 2  |                                          | INGQVITIK                       | 18  | 9  | 6  | 39.1   | b1y3y7y8°y8y9                                         | 985.59  | 49.110  | 50036  | 2 | 493.30  | -9.29  |
| P66313 RL6_SALTY 50S ribosomal protein L6 | 3  |                                          | TLNDAVEVK                       | 35  | 9  | 9  | 31.32  | b2°b2b7y1y2y3°y3y7y9                                  | 988.52  | 39.071  | 47950  | 2 | 494.76  | -10.19 |
| P66313 RL6_SALTY 50S ribosomal protein L6 | 4  |                                          | ALLNSMVIGVTEGFTK                | 69  | 16 | 11 | 66.12  | b2b6b14y2y6y7y8y12y13°y13y16                          | 1679.90 | 94.786  | 46537  | 2 | 840.45  | -1.53  |
| P66313 RL6_SALTY 50S ribosomal protein L6 | 5  |                                          | YADEVVR                         | 163 | 7  | 4  | 41.35  | y3y4y5y7                                              | 851.42  | 30.928  | 45395  | 2 | 426.21  | -11.25 |
| P66313 RL6_SALTY 50S ribosomal protein L6 | 6  |                                          | DGYADGWAQAGTAR                  | 55  | 14 | 7  | 60.28  | b3y1y4y5y7y10y11                                      | 1438.64 | 50.606  | 38770  | 2 | 719.82  | 5.01   |
| P66313 RL6_SALTY 50S ribosomal protein L6 | 7  |                                          | HADNALTFGPR                     | 44  | 11 | 8  | 71.7   | b2b5b6y4y5y9y10y11                                    | 1198.59 | 45.972  | 30514  | 2 | 599.80  | -3.56  |
| P66313 RL6_SALTY 50S ribosomal protein L6 | 8  |                                          | LQLVGVG YR                      | 86  | 9  | 7  | 46.88  | b2*b2y2y3y5y7y9                                       | 1004.58 | 60.209  | 29394  | 2 | 502.80  | -5.53  |
| P66313 RL6_SALTY 50S ribosomal protein L6 | 9  |                                          | QVIGQVAADLR                     | 138 | 11 | 6  | 51.62  | y1y2y5y6y8y9                                          | 1169.66 | 58.002  | 12137  | 2 | 585.33  | -6.26  |
| P66313 RL6_SALTY 50S ribosomal protein L6 | 10 |                                          | GADKQVIGQVAADLR                 | 134 | 15 | 4  | 32.8   | b4b9y5y6                                              | 1540.83 | 58.996  | 30246  | 3 | 514.28  | -6.42  |
| P66313 RL6_SALTY 50S ribosomal protein L6 | 11 |                                          | YADEVVRTK                       | 163 | 9  | 3  | 31.32  | b5b6y8                                                | 1080.58 | 26.250  | 6858   | 2 | 540.79  | 6.78   |
| P64052 EFTS_SALTY Elongation factor Ts    | 1  |                                          | VASLEGDVLGSYQHGAR               | 134 | 17 | 19 | 118.28 | b2b3y4y5*y5y7*y7y8°y8*y8y9y10°y10y11*y11y12y13°y13y17 | 1758.86 | 59.594  | 131716 | 3 | 586.96  | -10.34 |
| P64052 EFTS_SALTY Elongation factor Ts    | 2  |                                          | ITDVEVLK                        | 104 | 8  | 6  | 58.28  | y2y3y4y6y7y8                                          | 916.52  | 49.296  | 129010 | 2 | 458.77  | -12.52 |
| P64052 EFTS_SALTY Elongation factor Ts    | 3  |                                          | AEITASLVK                       | 1   | 9  | 6  | 63.16  | b3y4y5y6y7y9                                          | 931.53  | 49.340  | 119284 | 2 | 466.27  | -14.09 |
| P64052 EFTS_SALTY Elongation factor Ts    | 4  |                                          | FTGEVSLTGQPFVMEPSK              | 222 | 18 | 10 | 79.95  | b4b5b6b7°b7y1y3y5y10y13                               | 1953.97 | 75.479  | 72060  | 2 | 977.49  | 5.62   |
| P64052 EFTS_SALTY Elongation factor Ts    | 5  |                                          | IGENINIR                        | 125 | 8  | 9  | 55.27  | b2y2y3*y3y5y6y7*y7y8                                  | 928.51  | 45.095  | 50687  | 2 | 464.76  | -11.83 |
| P64052 EFTS_SALTY Elongation factor Ts    | 6  |                                          | ALTEANGDIELAIENMRK              | 25  | 18 | 5  | 32.2   | b7b10y5y9y16                                          | 1988.00 | 75.003  | 34040  | 3 | 663.34  | -7.37  |
| P64052 EFTS_SALTY Elongation factor Ts    | 7  |                                          | SVGQLLKEHNADVTGFIR              | 240 | 18 | 8  | 35.86  | b1b4*b4y4y6y8y9°y9                                    | 1984.05 | 66.237  | 21246  | 3 | 662.02  | -7.08  |

|                                        |    |                      |                               |     |    |    |        |                                                   |         |         |       |   |        |        |
|----------------------------------------|----|----------------------|-------------------------------|-----|----|----|--------|---------------------------------------------------|---------|---------|-------|---|--------|--------|
| P64052 EFTS_SALTY Elongation factor Ts | 8  |                      | VLDAAVAGK                     | 95  | 9  | 4  | 54.39  | b3y3y6y8                                          | 843.48  | 34.212  | 19832 | 2 | 422.24 | -13.82 |
| P64052 EFTS_SALTY Elongation factor Ts | 9  | Carbamidomethyl+C(8) | TGAGMMDCKK                    | 15  | 10 | 6  | 49.03  | b2b4y2y3y5y7                                      | 1098.47 | 21.671  | 10886 | 2 | 549.74 | -6.22  |
| P64052 EFTS_SALTY Elongation factor Ts | 10 |                      | ALTEANGDIELAIENMR             | 25  | 17 | 4  | 16.93  | b7y6*y6y11                                        | 1859.91 | 82.666  | 5770  | 3 | 620.64 | -4.66  |
| P64052 EFTS_SALTY Elongation factor Ts | 11 |                      | FEVGEGIEK                     | 258 | 9  | 3  | 31.32  | b4b8y7                                            | 1007.48 | 35.543  | 81343 | 2 | 504.24 | -21.63 |
| P64052 EFTS_SALTY Elongation factor Ts | 12 |                      | IGVLVAAK                      | 151 | 8  | 3  | 41.73  | y3y6y7                                            | 770.50  | 47.719  | 58749 | 2 | 385.75 | -20.83 |
| P64052 EFTS_SALTY Elongation factor Ts | 13 |                      | VALVAK                        | 119 | 6  | 2  | 27.44  | y4y5                                              | 600.41  | 47.714  | 3610  | 1 | 600.41 | -0.71  |
| P64052 EFTS_SALTY Elongation factor Ts | 14 |                      | DAGFQAFADKVLDAAVAGK           | 85  | 19 | 4  | 26.74  | b3y6y7y14                                         | 1893.94 | 98.164  | 96054 | 3 | 631.99 | -13.47 |
| P64052 EFTS_SALTY Elongation factor Ts | 15 |                      | FEVGEGIEKVETDFAAEVAAMSK       | 258 | 23 | 18 | 153.95 | b3b6b8b11b12*b12b13*b13y3y4y5y8y10y11y12y13y20y21 | 2457.18 | 106.415 | 87494 | 3 | 819.73 | -0.99  |
| P64052 EFTS_SALTY Elongation factor Ts | 16 |                      | KAGNVAADGVIK                  | 51  | 12 | 8  | 76.58  | b3b5b8*b8y4y6y7y11                                | 1142.65 | 31.986  | 51178 | 2 | 571.83 | -3.74  |
| P64052 EFTS_SALTY Elongation factor Ts | 17 |                      | RVASLEGDVLGSYQHGAR            | 133 | 18 | 3  | 23.57  | b8y4y5                                            | 1914.96 | 55.039  | 21374 | 3 | 638.99 | -7.84  |
| P64052 EFTS_SALTY Elongation factor Ts | 18 |                      | KALTEANGDIELAIENMR            | 24  | 18 | 4  | 33.47  | y4y5y12y16                                        | 1988.03 | 67.572  | 19489 | 2 | 994.52 | 7.74   |
| P64052 EFTS_SALTY Elongation factor Ts | 19 |                      | AQFEERVALVAK                  | 112 | 13 | 6  | 28.84  | b9b11*b11*b11b12*b12                              | 1489.81 | 109.266 | 10230 | 2 | 745.41 | 8.44   |
| P64052 EFTS_SALTY Elongation factor Ts | 20 |                      | KFTGEVSLTGQPFVMEPSK           | 221 | 19 | 5  | 26.74  | b7y7y8y12*y12                                     | 2082.07 | 77.863  | 8031  | 3 | 694.70 | 7.50   |
| P64052 EFTS_SALTY Elongation factor Ts | 21 |                      | EHNADVTGFIRFEVGEGIEK          | 247 | 20 | 4  | 23.03  | b3b4y6*y6                                         | 2247.09 | 69.146  | 5238  | 3 | 749.70 | -7.50  |
| P64052 EFTS_SALTY Elongation factor Ts | 22 |                      | FTGEVSLTGQPFVMEPSKSVGQLLK     | 222 | 25 | 5  | 28.57  | b3b5b9*b9b10                                      | 2679.44 | 84.944  | 4790  | 3 | 893.82 | 10.84  |
| P64052 EFTS_SALTY Elongation factor Ts | 23 | Oxidation+M(14)      | FTGEVSLTGQPFVMEPSK            | 222 | 18 | 3  | 16.16  | b3b5y5                                            | 1969.96 | 80.349  | 7429  | 2 | 985.48 | 1.61   |
| P64052 EFTS_SALTY Elongation factor Ts | 24 |                      | ITASLVK                       | 3   | 7  | 0  | 1.51   |                                                   | 731.46  | 49.337  | 14372 | 1 | 731.46 | -4.92  |
| P64052 EFTS_SALTY Elongation factor Ts | 25 |                      | VLDAAVA                       | 95  | 7  | 1  | 9.02   | y5                                                | 658.38  | 34.219  | 13188 | 1 | 658.38 | 4.73   |
| P64052 EFTS_SALTY Elongation factor Ts | 26 |                      | TDVEVLK                       | 105 | 7  | 3  | 25.19  | b3*b3b4                                           | 803.44  | 49.304  | 3962  | 1 | 803.44 | -12.76 |
| P64052 EFTS_SALTY Elongation factor Ts | 27 | Carbamidomethyl+C(7) | GAGMMDCKK                     | 16  | 9  | 0  | 1.88   |                                                   | 997.42  | 21.674  | 3148  | 2 | 499.22 | -3.30  |
| P26982 DEGP_SALTY Protease do          | 1  |                      | AGDVITSLNGKPISSFAALR          | 332 | 20 | 10 | 83.55  | b3b4b5b8b10b12y3y4y7y9                            | 2017.09 | 75.520  | 72207 | 3 | 673.03 | -9.80  |
| P26982 DEGP_SALTY Protease do          | 2  |                      | GYVVTNNHVVDNASVIK             | 124 | 17 | 16 | 154.9  | b2b3b6b9y2y3y6y8y9y10y11y12y13y14y15y17           | 1828.93 | 50.768  | 58718 | 3 | 610.31 | -14.35 |
| P26982 DEGP_SALTY Protease do          | 3  |                      | SDIALIQINPK                   | 160 | 12 | 16 | 122.41 | b3*b3b4b5b9b10*b10b12y2y3y4*y4y5y6y9y12           | 1339.76 | 64.714  | 51013 | 2 | 670.38 | 0.27   |
| P26982 DEGP_SALTY Protease do          | 4  |                      | AQVGTMPVGSK                   | 352 | 11 | 12 | 75.68  | b2*b2b3y1y2y3y5y7y8*y8y9y11                       | 1074.55 | 35.480  | 42426 | 2 | 537.78 | -7.16  |
| P26982 DEGP_SALTY Protease do          | 5  |                      | GAFVSQVMPNSSAAK               | 313 | 15 | 12 | 123.66 | b3b5b7*b7b8b11b13y8y9y10y11y15                    | 1493.75 | 53.963  | 42009 | 2 | 747.38 | 4.66   |
| P26982 DEGP_SALTY Protease do          | 6  |                      | NLTSQMVEYGQVK                 | 275 | 13 | 6  | 33.35  | b5b11b12y1y5y13                                   | 1496.75 | 58.266  | 41361 | 2 | 748.88 | 5.63   |
| P26982 DEGP_SALTY Protease do          | 7  |                      | ISLGLLR                       | 363 | 7  | 5  | 54.89  | y3y4y5y6y7                                        | 771.50  | 68.977  | 22561 | 2 | 386.25 | -10.44 |
| P26982 DEGP_SALTY Protease do          | 8  |                      | VGDYTV AIGNPFLGETVTSGIVS ALGR | 186 | 28 | 18 | 125.63 | b2b3b4b6*b6b7b11b12y2y3y4y5y6y8y10y14y20y28       | 2750.43 | 117.119 | 22369 | 3 | 917.48 | -2.57  |

|                                               |    |                                                      |                                              |     |    |    |       |                                             |         |         |       |   |         |        |
|-----------------------------------------------|----|------------------------------------------------------|----------------------------------------------|-----|----|----|-------|---------------------------------------------|---------|---------|-------|---|---------|--------|
| P26982 DEGP_SALTY Protease do                 | 9  |                                                      | SGLNVENYENFIQTDAAINR                         | 214 | 20 | 10 | 29.17 | b2b6b13*b13y5y8*y8y12*y12y20                | 2268.11 | 78.240  | 18594 | 2 | 1134.56 | 11.09  |
| P26982 DEGP_SALTY Protease do                 | 10 |                                                      | GELGIMGTELNSELAK                             | 289 | 16 | 3  | 17.8  | b9y6y11                                     | 1661.85 | 102.098 | 2113  | 3 | 554.62  | 3.45   |
| P26982 DEGP_SALTY Protease do                 | 11 | Carbamidomethyl+C(13)<br>;Carbamidomethyl+C(25)<br>) | NFQQFFGDDSPFCQDGSFPQNSPF<br>CQGGGNGGGNGGQQQK | 71  | 39 | 4  | 14.67 | b12y8y10y13                                 | 4240.80 | 91.536  | 4818  | 3 | 1414.27 | 11.97  |
| P26982 DEGP_SALTY Protease do                 | 12 |                                                      | VMPSVVSVINVEGSTTVNTPR                        | 48  | 20 | 6  | 31.8  | b4b5b7*b7y5y13                              | 2087.08 | 88.209  | 4555  | 3 | 696.37  | 1.64   |
| P26982 DEGP_SALTY Protease do                 | 13 |                                                      | NIAELR                                       | 443 | 6  | 1  | 13.91 | b4                                          | 715.41  | 34.089  | 4337  | 2 | 358.21  | -4.27  |
| P26982 DEGP_SALTY Protease do                 | 14 |                                                      | RGELGIMGTELNSELAK                            | 288 | 17 | 13 | 111.6 | b5b6b7b8b10b12b14y3y6y7y10*y10*y10          | 1817.92 | 69.255  | 47265 | 3 | 606.65  | -10.34 |
| P26982 DEGP_SALTY Protease do                 | 15 |                                                      | VDAQRGAFVSQVMPNSSAAK                         | 308 | 20 | 4  | 14.9  | b6*b6y5y13                                  | 2063.02 | 48.788  | 11795 | 4 | 516.51  | -7.46  |
| P26982 DEGP_SALTY Protease do                 | 16 |                                                      | GAFVSQVMPNSSAAKAGIK                          | 313 | 19 | 3  | 22.45 | b6b8b13                                     | 1862.98 | 63.306  | 8027  | 3 | 621.66  | -1.77  |
| P26982 DEGP_SALTY Protease do                 | 17 |                                                      | KGDVIIGANQQPVK                               | 429 | 14 | 5  | 27.76 | y5*y5y7y8*y8                                | 1466.83 | 39.162  | 7214  | 2 | 733.92  | -2.16  |
| P26982 DEGP_SALTY Protease do                 | 18 |                                                      | GELGIMGTELNSELAKAMK                          | 289 | 19 | 5  | 41.07 | b3b4b5b10y15                                | 1992.01 | 95.308  | 6971  | 2 | 996.51  | -3.37  |
| P26982 DEGP_SALTY Protease do                 | 19 | Phosphoryl STY(14)                                   | GYVVTTNNHVVDNASVIK                           | 124 | 17 | 4  | 16.93 | b6b13y4*y4                                  | 1908.91 | 87.021  | 5760  | 2 | 954.96  | -3.65  |
| P26982 DEGP_SALTY Protease do                 | 20 | Oxidation+M(6)                                       | AQVGTMPVGSK                                  | 352 | 11 | 3  | 25.08 | b5b10y10                                    | 1090.56 | 46.043  | 2507  | 2 | 545.79  | 6.49   |
| P26982 DEGP_SALTY Protease do                 | 21 |                                                      | VTNNHVVDNASVIK                               | 127 | 14 | 10 | 54.71 | b4b5*b5b6*b6b11*b11b12*b12*b12              | 1509.80 | 50.763  | 1756  | 2 | 755.40  | -4.61  |
| Q9L4T0 LUXS_SALTY S-ribosylhomocysteine lyase | 1  |                                                      | TMNTPHGDAITVFDLR                             | 23  | 16 | 15 | 73.63 | b2b3b10b11*b11*b11y2y4y6*y6y10*y10y11y12y16 | 1787.86 | 71.822  | 49756 | 3 | 596.62  | -9.63  |
| Q9L4T0 LUXS_SALTY S-ribosylhomocysteine lyase | 2  |                                                      | MQAPAVR                                      | 13  | 7  | 6  | 41.35 | b1b2y3y4y5y7                                | 772.40  | 31.078  | 26800 | 2 | 386.71  | -13.75 |
| Q9L4T0 LUXS_SALTY S-ribosylhomocysteine lyase | 3  |                                                      | PLLDSEFAVDHTR                                | 1   | 12 | 4  | 23.03 | b11y5*y5y7                                  | 1370.70 | 56.900  | 21092 | 3 | 457.57  | -8.19  |
| Q9L4T0 LUXS_SALTY S-ribosylhomocysteine lyase | 4  | Carbamidomethyl+C(15)                                | VQDQNQIPELNVYQCGTYQMHSLS<br>SEAQDIAR         | 113 | 31 | 8  | 35.55 | b10b12y3y8y11y13y24y31                      | 3635.70 | 75.860  | 20365 | 3 | 1212.57 | 5.17   |
| Q9L4T0 LUXS_SALTY S-ribosylhomocysteine lyase | 5  |                                                      | TGFYMSLIGTPDEQR                              | 84  | 15 | 7  | 38.39 | b3b13y2y7*y7y8y14                           | 1714.82 | 79.151  | 17215 | 2 | 857.91  | 5.77   |
| Q9L4T0 LUXS_SALTY S-ribosylhomocysteine lyase | 6  |                                                      | VADAWK                                       | 99  | 6  | 1  | 13.91 | b5                                          | 689.37  | 37.307  | 5790  | 1 | 689.37  | 14.25  |
| Q9L4T0 LUXS_SALTY S-ribosylhomocysteine lyase | 7  | Carbamidomethyl+C(18)                                | DHLNGNGVEIIDISPMGCRTGFYMSLIGTPDEQR           | 65  | 34 | 3  | 22.43 | b14b15y3                                    | 3792.79 | 107.474 | 7807  | 4 | 948.95  | 3.93   |
| Q9L4T0 LUXS_SALTY S-ribosylhomocysteine lyase | 8  |                                                      | EVMPEKGIHTLEHLFAGFMR                         | 45  | 20 | 3  | 23.03 | b10y6y7                                     | 2342.17 | 87.106  | 4178  | 3 | 781.39  | -3.96  |
| Q9L4T0 LUXS_SALTY S-ribosylhomocysteine lyase | 9  |                                                      | TGFYMSLIGTPDEQRVADAWK                        | 84  | 21 | 5  | 39.72 | b3b9b10b11y11                               | 2385.14 | 86.284  | 2624  | 3 | 795.72  | -5.53  |
| Q9L4T0 LUXS_SALTY S-ribosylhomocysteine lyase | 10 | Oxidation+M(13)                                      | GIHTLEHLFAGFMR                               | 51  | 14 | 3  | 19.98 | b7b11y8                                     | 1644.85 | 66.749  | 11738 | 2 | 822.93  | 11.87  |
| Q9L4T0 LUXS_SALTY S-ribosylhomocysteine lyase | 11 | Carbamidomethyl+C(18)<br>;Oxidation+M(16)            | DHLNGNGVEIIDISPMGCR                          | 65  | 19 | 8  | 44.07 | b6b10*b10b11*b11y9y12y13                    | 2112.99 | 108.715 | 2374  | 2 | 1057.00 | 5.20   |
| P0A8B8 YBAB_SALTY UPF0133 protein ybaB        | 1  |                                                      | VEIDPSLLEDDKEMLEDLVAAAFNDAAR                 | 54  | 28 | 5  | 26.46 | b6b7b9y7y12                                 | 3089.51 | 127.514 | 5667  | 3 | 1030.51 | 2.37   |
| P0A8B8 YBAB_SALTY UPF0133 protein ybaB        | 2  | Carbamidomethyl+C(9)                                 | VTINGAHNCR                                   | 43  | 10 | 9  | 56.02 | y1y2y3*y3y4*y4y6y7y10                       | 1141.55 | 21.122  | 4769  | 2 | 571.28  | -3.53  |
| P0A8B8 YBAB_SALTY UPF0133 protein ybaB        | 3  |                                                      | MQEIIAQLEVTGESGAGLVK                         | 23  | 20 | 7  | 46.37 | b6b10b12b13*b13b14*b14                      | 2089.04 | 105.298 | 2764  | 3 | 697.02  | -4.79  |
| P0A8B8 YBAB_SALTY UPF0133 protein ybaB        | 4  |                                                      | EMLEDLVAAAFNDAAR                             | 66  | 16 | 3  | 17.8  | b9b12y4                                     | 1735.82 | 95.595  | 2295  | 2 | 868.42  | -4.36  |
| P0A8B8 YBAB_SALTY UPF0133 protein ybaB        | 5  |                                                      | EMLEDLVAAAFNDAARR                            | 66  | 17 | 3  | 16.93 | b6y3y10                                     | 1891.91 | 87.044  | 2027  | 3 | 631.31  | -12.13 |
| P0A8B8 YBAB_SALTY UPF0133 protein ybaB        | 6  |                                                      | MASVSSGMQLPPGFK                              | 91  | 15 | 3  | 26.89 | b5b6b9                                      | 1536.74 | 41.077  | 2885  | 3 | 512.92  | -6.91  |
| P0A8B8 YBAB_SALTY UPF0133 protein ybaB        | 7  |                                                      | MASVSSGMQLPPGFKMPF                           | 91  | 18 | 3  | 16.16 | b12y5y8                                     | 1911.91 | 68.500  | 4217  | 2 | 956.46  | -2.94  |
| P0A8B8 YBAB_SALTY UPF0133 protein ybaB        | 8  |                                                      | GGLGNLMKQAQQMQEK                             | 4   | 16 | 3  | 17.8  | b3b6y5                                      | 1760.88 | 118.428 | 2699  | 2 | 880.94  | -1.04  |

|                                                            |    |                      |                                        |     |    |    |        |                                 |         |         |       |   |         |        |
|------------------------------------------------------------|----|----------------------|----------------------------------------|-----|----|----|--------|---------------------------------|---------|---------|-------|---|---------|--------|
| [P0A8B8]YBAB_SALTY UPF0133 protein ybaB                    | 9  |                      | EKMASVSSGMQLPPGFK                      | 89  | 17 | 4  | 23.92  | b13b14y10*y10                   | 1793.90 | 102.014 | 1847  | 2 | 897.46  | 6.67   |
| [P0A8B8]YBAB_SALTY UPF0133 protein ybaB                    | 10 | Oxidation+M(1)       | MQEEIAQLEVTGESGAGLVK                   | 23  | 20 | 4  | 14.9   | b10y14*y14y16                   | 2105.02 | 85.863  | 7948  | 3 | 702.35  | -10.67 |
| [P0A8B8]YBAB_SALTY UPF0133 protein ybaB                    | 11 | Carbamidomethyl+C(8) | TINGAHNCR                              | 44  | 9  | 1  | 8.43   | b7                              | 1042.48 | 21.114  | 3023  | 2 | 521.74  | -3.98  |
| [P0A2M5]UPP_SALTY Uracil phohoribosyltransferase           | 1  |                      | AGLGMMEGVLENVPSAR                      | 78  | 17 | 10 | 59.6   | b11b13y4y7°y7y10y11°y11y12y17   | 1730.87 | 82.428  | 31138 | 2 | 865.94  | 5.92   |
| [P0A2M5]UPP_SALTY Uracil phohoribosyltransferase           | 2  |                      | VLVLVAAPEGIAALEK                       | 155 | 16 | 11 | 108.47 | b2b3b4b5b6b7y2y9y10y11y12       | 1592.97 | 86.660  | 23992 | 2 | 796.99  | 5.36   |
| [P0A2M5]UPP_SALTY Uracil phohoribosyltransferase           | 3  |                      | MALIVDPMLATGGSVIATIDLLKK               | 124 | 24 | 4  | 23.41  | b2b3b6b7                        | 2470.40 | 114.459 | 17709 | 3 | 824.14  | -2.67  |
| [P0A2M5]UPP_SALTY Uracil phohoribosyltransferase           | 4  |                      | ITVVPILR                               | 70  | 8  | 4  | 41.73  | y4y5y6y8                        | 910.60  | 70.362  | 12934 | 2 | 455.81  | -5.63  |
| [P0A2M5]UPP_SALTY Uracil phohoribosyltransferase           | 5  |                      | ELASEVGSLLTYEATADLETEK                 | 29  | 22 | 3  | 13.91  | b7y9y15                         | 2369.19 | 109.918 | 2161  | 2 | 1185.10 | 13.71  |
| [P0A2M5]UPP_SALTY Uracil phohoribosyltransferase           | 6  |                      | AHPDVELYTASIDQGLNEHGYYIP GLGDAGDK      | 171 | 32 | 3  | 11.34  | b5b8y8                          | 3365.68 | 53.907  | 6265  | 4 | 842.18  | 15.09  |
| [P0A2M5]UPP_SALTY Uracil phohoribosyltransferase           | 7  |                      | NEETLEPVYPYFQK                         | 103 | 13 | 4  | 21.36  | b6b8°b8y7                       | 1593.76 | 52.991  | 4960  | 2 | 797.38  | -10.72 |
| [P0A2M5]UPP_SALTY Uracil phohoribosyltransferase           | 8  |                      | VTIEGWNGPVEIDQIK                       | 51  | 16 | 3  | 17.8   | b6b8y4                          | 1797.92 | 59.718  | 4176  | 3 | 599.98  | -12.22 |
| [P0A2M5]UPP_SALTY Uracil phohoribosyltransferase           | 9  |                      | AHPDVELYTASIDQGLNEHGYYIP GLGDAGDKIFGTK | 171 | 37 | 11 | 62.14  | b5b6b7°b7b8b13°b13y11y13y14°y14 | 3911.94 | 89.296  | 32257 | 4 | 978.74  | -1.75  |
| [P0A2M5]UPP_SALTY Uracil phohoribosyltransferase           | 10 | Oxidation+M()        | AGLGMMEGVLENVPSAR                      | 78  | 17 | 3  | 25.58  | b3b4b13                         | 1746.86 | 64.041  | 16567 | 3 | 582.96  | 4.47   |
| [P66170]RL29_SALTY 50S ribosomal protein L29               | 1  |                      | SVEELNTELLNLLR                         | 9   | 14 | 12 | 105.95 | b2b3b4b5y3y4y5y6y8y9y14*y14     | 1642.90 | 101.324 | 91518 | 2 | 821.95  | -0.52  |
| [P66170]RL29_SALTY 50S ribosomal protein L29               | 2  |                      | SVEELNTELLNLLREQFNLR                   | 9   | 20 | 8  | 54.19  | b2b3b4y13y16y17y18y20           | 2430.29 | 112.169 | 36655 | 3 | 810.77  | -3.72  |
| [P66170]RL29_SALTY 50S ribosomal protein L29               | 3  |                      | MQAASGQLQQSHLLK                        | 29  | 15 | 7  | 30.42  | b2*b2b4b5b11y2y5                | 1639.85 | 51.294  | 4525  | 3 | 547.29  | -5.58  |
| [P66170]RL29_SALTY 50S ribosomal protein L29               | 4  |                      | EQFNLR                                 | 23  | 6  | 4  | 27.44  | y3*y3y4*y4                      | 806.41  | 42.431  | 46960 | 2 | 403.71  | -12.19 |
| [P66170]RL29_SALTY 50S ribosomal protein L29               | 5  |                      | EKSVEELNTELLNLLR                       | 7   | 16 | 4  | 29.29  | b12y3y5y6                       | 1900.02 | 94.984  | 32582 | 3 | 634.01  | -10.99 |
| [P66170]RL29_SALTY 50S ribosomal protein L29               | 6  |                      | EQFNLRMQAASGQLQQSHLLK                  | 23  | 21 | 5  | 19.74  | b6°b6b12y3y15                   | 2427.26 | 85.833  | 11579 | 3 | 809.76  | 2.51   |
| [P66170]RL29_SALTY 50S ribosomal protein L29               | 7  | Phosphoryl.STY(7)    | SVEELNTELLNLLR                         | 9   | 14 | 3  | 19.98  | b3b6y8                          | 1722.85 | 108.192 | 2379  | 3 | 574.95  | -5.46  |
| [Q7CQV9]DPS_SALTY DNA protection during starvation protein | 1  |                      | TALTDHLDTMAER                          | 70  | 13 | 6  | 42.38  | b2y3y5y7y8y13                   | 1473.68 | 52.862  | 48882 | 3 | 491.90  | -13.83 |
| [Q7CQV9]DPS_SALTY DNA protection during starvation protein | 2  |                      | GANFIADVHEMLDGFR                       | 55  | 15 | 11 | 76.77  | b7b9°b9b10°b10y3y5y6°y6y8y10    | 1676.80 | 82.661  | 38170 | 3 | 559.60  | -14.34 |
| [Q7CQV9]DPS_SALTY DNA protection during starvation protein | 3  |                      | AIGEAKDEDTADIFTAASR                    | 134 | 19 | 9  | 51.85  | b2b4b12y5y6°y6y8y10y13          | 1980.95 | 59.028  | 25401 | 3 | 660.99  | -2.10  |
| [Q7CQV9]DPS_SALTY DNA protection during starvation protein | 4  |                      | AVQLGGVALGTTQVINSK                     | 83  | 18 | 7  | 38.2   | b15y2y3°y3y9y11y15              | 1756.01 | 68.181  | 22309 | 2 | 878.51  | 5.42   |
| [Q7CQV9]DPS_SALTY DNA protection during starvation protein | 5  |                      | ASNLLYTR                               | 10  | 8  | 4  | 41.73  | b3°b3b4b6                       | 937.51  | 45.382  | 9393  | 2 | 469.26  | 4.23   |
| [Q7CQV9]DPS_SALTY DNA protection during starvation protein | 6  |                      | SYPLDIHNVQDHLK                         | 105 | 14 | 5  | 28.58  | b6b8y3y7*y7                     | 1678.86 | 58.116  | 9647  | 3 | 560.29  | 0.65   |
| [Q7CQV9]DPS_SALTY DNA protection during starvation protein | 7  |                      | FLWFIESNIE                             | 157 | 10 | 8  | 62.56  | b9y3°y3y4°y4y6*y6y9             | 1297.67 | 56.249  | 6102  | 2 | 649.34  | 18.34  |
| [Q7CQV9]DPS_SALTY DNA protection during starvation protein | 8  |                      | ASNLLYTRNDVSESDK                       | 10  | 16 | 7  | 46.93  | b4y11y12°y12°y12y14y15          | 1811.90 | 90.440  | 20151 | 3 | 604.64  | 11.18  |
| [Q7CQV9]DPS_SALTY DNA protection during starvation protein | 9  |                      | GANFIADVHEMLDGFRALTDHLD TMAER          | 55  | 28 | 3  | 18.03  | y4y8y16                         | 3131.50 | 104.299 | 18905 | 4 | 783.63  | -1.56  |

|                                                           |    |                      |                                       |     |    |    |        |                                     |         |         |        |   |         |        |
|-----------------------------------------------------------|----|----------------------|---------------------------------------|-----|----|----|--------|-------------------------------------|---------|---------|--------|---|---------|--------|
| Q7CQV9 DPS_SALTY DNA protection during starvation protein | 10 |                      | TALTDHLDTMAERAVQLGGVAL GTTQVINSK      | 70  | 31 | 3  | 17.33  | b11b13b29                           | 3210.64 | 117.951 | 1562   | 3 | 1070.88 | -12.24 |
| Q7CQV9 DPS_SALTY DNA protection during starvation protein | 11 |                      | LTDHLDTMAER                           | 72  | 11 | 3  | 28.84  | b3b4b9                              | 1301.63 | 52.828  | 6055   | 2 | 651.32  | 13.97  |
| Q7CPE1 ATPA_SALTY ATP synthase subunit alpha              | 1  |                      | IGSFEAALLAYVDRDHAPLMQEIN QSGGYNDEIEGK | 463 | 36 | 14 | 59.12  | b5b6b7b23b25y2y3°y3y6y7°y7y11y13y36 | 3950.90 | 95.835  | 94139  | 4 | 988.48  | 2.29   |
| Q7CPE1 ATPA_SALTY ATP synthase subunit alpha              | 2  |                      | ILEVPVGR                              | 93  | 8  | 7  | 55.27  | b2y3y4y5y6°y6y8                     | 882.53  | 53.131  | 46950  | 2 | 441.77  | -11.34 |
| Q7CPE1 ATPA_SALTY ATP synthase subunit alpha              | 3  |                      | MQLNSTEISELIK                         | 0   | 13 | 8  | 46.88  | b2b3y2y3y8y10y11y13                 | 1505.79 | 77.503  | 37068  | 2 | 753.40  | 1.22   |
| Q7CPE1 ATPA_SALTY ATP synthase subunit alpha              | 4  | Carbamidomethyl+C(7) | IHGLADCMQGEMISLPGNR                   | 40  | 19 | 7  | 26.74  | b2b9y3y4*y4y6y19                    | 2098.98 | 69.584  | 34293  | 3 | 700.33  | -1.51  |
| Q7CPE1 ATPA_SALTY ATP synthase subunit alpha              | 5  |                      | ASTISNVVR                             | 201 | 9  | 6  | 39.1   | b1y5*y5y6y7y9                       | 946.52  | 37.858  | 31741  | 2 | 473.77  | -8.06  |
| Q7CPE1 ATPA_SALTY ATP synthase subunit alpha              | 6  |                      | GYLADVELAK                            | 453 | 10 | 6  | 59.55  | b3y3y6y7y8y10                       | 1078.57 | 60.974  | 29527  | 2 | 539.79  | -7.58  |
| Q7CPE1 ATPA_SALTY ATP synthase subunit alpha              | 7  |                      | QYAPMSVAQQSLVFAAER                    | 434 | 19 | 7  | 21.57  | b2*b2b3b10y4y16y19                  | 2109.10 | 93.857  | 26966  | 2 | 1055.05 | 8.91   |
| Q7CPE1 ATPA_SALTY ATP synthase subunit alpha              | 8  |                      | DSVGAVVMGPYADLAEGMK                   | 68  | 19 | 11 | 60.88  | b3°b3b6b8°b8b9b15y11y13y18y19       | 1909.93 | 84.274  | 23767  | 2 | 955.47  | 11.57  |
| Q7CPE1 ATPA_SALTY ATP synthase subunit alpha              | 9  |                      | ELAAFSQFASDLDDATR                     | 401 | 17 | 9  | 71.36  | b2b6b7y3y4y5y6y10y17                | 1856.88 | 89.183  | 21133  | 2 | 928.94  | 7.76   |
| Q7CPE1 ATPA_SALTY ATP synthase subunit alpha              | 10 |                      | ELAAFSQFASDLDDATRK                    | 401 | 18 | 3  | 25.08  | y4y9y10                             | 1984.95 | 83.886  | 17790  | 3 | 662.32  | -6.89  |
| Q7CPE1 ATPA_SALTY ATP synthase subunit alpha              | 11 |                      | QSVDQPVPQTGYK                         | 139 | 12 | 12 | 102.46 | b5°b5°b5b12y3y4y5y6y7y9y10y12       | 1349.67 | 34.736  | 14940  | 2 | 675.34  | -1.72  |
| Q7CPE1 ATPA_SALTY ATP synthase subunit alpha              | 12 | Carbamidomethyl+C(1) | CIIYVAIGQK                            | 192 | 9  | 5  | 55.64  | b3b4b5b6y9                          | 1051.56 | 58.111  | 14646  | 2 | 526.28  | -2.44  |
| Q7CPE1 ATPA_SALTY ATP synthase subunit alpha              | 13 |                      | IAQFNVVSEAHNEGTVSVSDGVI R             | 15  | 25 | 5  | 12.8   | b2b3b13*b13y15                      | 2641.39 | 93.843  | 5370   | 3 | 881.13  | 10.35  |
| Q7CPE1 ATPA_SALTY ATP synthase subunit alpha              | 14 |                      | TALAIIDAINQRDSGIK                     | 175 | 17 | 7  | 37.38  | b4°b4b6°b6b7b14y6                   | 1798.98 | 104.628 | 2785   | 2 | 899.99  | -12.89 |
| Q7CPE1 ATPA_SALTY ATP synthase subunit alpha              | 15 |                      | AVDSMIPIGR                            | 151 | 10 | 3  | 34.7   | b4b7b8                              | 1058.56 | 52.835  | 155439 | 2 | 529.78  | -6.23  |
| Q7CPE1 ATPA_SALTY ATP synthase subunit alpha              | 16 |                      | GEDALIIYDDLK                          | 252 | 13 | 4  | 35.48  | b5b12y3y4                           | 1451.72 | 68.928  | 40888  | 2 | 726.36  | -3.03  |
| Q7CPE1 ATPA_SALTY ATP synthase subunit alpha              | 17 |                      | TALAIIDAINQR                          | 175 | 12 | 3  | 23.03  | b4y4y9                              | 1298.74 | 74.802  | 32413  | 2 | 649.88  | 1.13   |
| Q7CPE1 ATPA_SALTY ATP synthase subunit alpha              | 18 |                      | VGGAAQTK                              | 376 | 8  | 4  | 41.73  | b3b4b7°b7                           | 731.40  | 33.365  | 12578  | 1 | 731.40  | -10.26 |
| Q7CPE1 ATPA_SALTY ATP synthase subunit alpha              | 19 |                      | ATQSW                                 | 508 | 5  | 1  | 13.53  | y4                                  | 592.27  | 76.137  | 9481   | 1 | 592.27  | -1.24  |
| Q7CPE1 ATPA_SALTY ATP synthase subunit alpha              | 20 |                      | DHAPLMQEINQSGGYNDEIEGK                | 477 | 22 | 3  | 13.91  | b12y4y12                            | 2445.10 | 107.404 | 2422   | 3 | 815.71  | 2.00   |
| Q7CPE1 ATPA_SALTY ATP synthase subunit alpha              | 21 |                      | VNADYVEAFTK                           | 303 | 11 | 3  | 28.09  | b4y8y9                              | 1256.64 | 40.189  | 2117   | 3 | 419.55  | 18.46  |
| Q7CPE1 ATPA_SALTY ATP synthase subunit alpha              | 22 |                      | VNADYVEAFTKGEVK                       | 303 | 15 | 4  | 30.42  | b12y4y7y8                           | 1669.82 | 63.727  | 58693  | 3 | 557.28  | -12.06 |
| Q7CPE1 ATPA_SALTY ATP synthase subunit alpha              | 23 |                      | VVNTLGAPIDKGKPGVDNDGFSAV EAIAPGVIDR   | 106 | 33 | 12 | 65.31  | b4b26y3y6°y6y7y8y10y13y16y26°y26    | 3263.72 | 84.920  | 33155  | 3 | 1088.58 | 8.90   |
| Q7CPE1 ATPA_SALTY ATP synthase subunit alpha              | 24 |                      | QSVDQPVPQTGYKAVDSMIPIGR               | 139 | 22 | 5  | 25.01  | b5b12b13°b13y8                      | 2389.21 | 98.355  | 32947  | 2 | 1195.11 | -1.63  |
| Q7CPE1 ATPA_SALTY ATP synthase subunit alpha              | 25 |                      | QKQYAPMSVAQQSLVFAAER                  | 432 | 21 | 4  | 25.52  | b12y4y5y13                          | 2365.23 | 86.440  | 14119  | 3 | 789.08  | -2.99  |
| Q7CPE1 ATPA_SALTY ATP synthase subunit alpha              | 26 |                      | TALAQYRELAAFSQFASDLDDAT R             | 394 | 24 | 3  | 22.42  | b8y5y6                              | 2660.29 | 95.448  | 5369   | 3 | 887.44  | -0.28  |
| Q7CPE1 ATPA_SALTY ATP synthase subunit alpha              | 27 |                      | DRGEDALIIYDDLK                        | 250 | 15 | 8  | 56.18  | b3b4°b4b12b13y7y11°y11              | 1722.85 | 96.488  | 2604   | 2 | 861.93  | -1.70  |

|                                                |    |                       |                                             |     |    |    |        |                                                         |         |         |       |   |         |        |
|------------------------------------------------|----|-----------------------|---------------------------------------------|-----|----|----|--------|---------------------------------------------------------|---------|---------|-------|---|---------|--------|
| [Q7CPEI]ATPA_SALTY ATP synthase subunit alpha  | 28 | Oxidation+M(8)        | DSVGAVVMGPYADLAEGMK                         | 68  | 19 | 6  | 39.63  | b5b12b16y4y7y11                                         | 1925.92 | 67.215  | 3163  | 2 | 963.46  | 11.28  |
| [Q7CPEI]ATPA_SALTY ATP synthase subunit alpha  | 29 |                       | ELAAFSQFASDLDDATRK                          | 401 | 18 | 0  | 4.9    |                                                         | 1966.95 | 83.884  | 2659  | 3 | 656.32  | 1.74   |
| [P26976]PHON_SALTY Non-ecific acid phohatase   | 1  |                       | NGSYPSGHTAYGTLLALVLSEARPER                  | 150 | 26 | 12 | 37.93  | b2*b2b3*b3*b3b6b14y7y12y16y22y26                        | 2759.38 | 96.799  | 63201 | 4 | 690.60  | -10.62 |
| [P26976]PHON_SALTY Non-ecific acid phohatase   | 2  |                       | LQTIPAFQK                                   | 215 | 9  | 6  | 46.88  | b2*b2y3y5y7y9                                           | 1045.59 | 55.841  | 46800 | 2 | 523.30  | -8.87  |
| [P26976]PHON_SALTY Non-ecific acid phohatase   | 3  |                       | IFSPVVGAK                                   | 85  | 9  | 7  | 39.1   | b2y1y2y3y4y7y9                                          | 917.54  | 51.820  | 41903 | 2 | 459.27  | -10.64 |
| [P26976]PHON_SALTY Non-ecific acid phohatase   | 4  |                       | NLLTMGGYYATASAK                             | 108 | 15 | 11 | 95.08  | b2b3b11b13y5y6y10y11y12y13y15                           | 1560.78 | 70.472  | 34127 | 2 | 780.89  | 4.15   |
| [P26976]PHON_SALTY Non-ecific acid phohatase   | 5  |                       | NLLTMGGYYATASAKK                            | 108 | 16 | 3  | 24.33  | b11y11y12                                               | 1688.85 | 64.615  | 19762 | 3 | 563.62  | -11.64 |
| [P26976]PHON_SALTY Non-ecific acid phohatase   | 6  |                       | QAAEDADVSVENIAR                             | 70  | 15 | 15 | 65.16  | b2*b2b4b10*b10y4*y4y9y10*y10y11*y11y13*y13y15           | 1587.77 | 51.373  | 7824  | 2 | 794.39  | 4.46   |
| [P26976]PHON_SALTY Non-ecific acid phohatase   | 7  |                       | NNLSKEDHPK                                  | 236 | 11 | 3  | 36.84  | y3y4y5                                                  | 1294.66 | 31.042  | 1888  | 3 | 432.23  | -11.13 |
| [P26976]PHON_SALTY Non-ecific acid phohatase   | 8  | Carbamidomethyl+C(12) | TRPFVLFNHSTCRPEDENTLR                       | 128 | 21 | 4  | 14.38  | b12*b12y9y11                                            | 2589.21 | 74.655  | 2050  | 3 | 863.74  | -18.58 |
| [P26976]PHON_SALTY Non-ecific acid phohatase   | 9  |                       | EELNDK                                      | 230 | 6  | 2  | 13.91  | b3*b3                                                   | 747.36  | 46.100  | 1814  | 1 | 747.36  | 5.88   |
| [P26976]PHON_SALTY Non-ecific acid phohatase   | 10 |                       | WKQAAEDADVSVENIAR                           | 68  | 17 | 3  | 23.92  | b9y6y7                                                  | 1901.92 | 54.771  | 16731 | 3 | 634.64  | -10.21 |
| [P26976]PHON_SALTY Non-ecific acid phohatase   | 11 |                       | YTSAETVQPFHSPPEESVNSQFYLP<br>PPPGNDDPAYRYDK | 16  | 38 | 5  | 20.54  | b3b9b12b14y8                                            | 4342.99 | 104.134 | 15500 | 5 | 869.40  | 0.67   |
| [P26976]PHON_SALTY Non-ecific acid phohatase   | 12 |                       | RGWEFGQSR                                   | 182 | 9  | 3  | 31.32  | b7y4y7                                                  | 1122.54 | 53.914  | 4684  | 3 | 374.85  | -6.09  |
| [P26976]PHON_SALTY Non-ecific acid phohatase   | 13 |                       | FSPVVGAK                                    | 86  | 8  | 1  | 9.02   | b4                                                      | 804.45  | 51.780  | 6943  | 1 | 804.45  | -14.95 |
| [P26976]PHON_SALTY Non-ecific acid phohatase   | 14 |                       | IFSPVVGAK                                   | 85  | 9  | 0  | 1.51   |                                                         | 899.52  | 51.802  | 2831  | 2 | 450.27  | -6.58  |
| [P65882]PURA_SALTY Adenylosuccinate synthetase | 1  | Carbamidomethyl+C(7)  | LLLSEACPLILDYHVALDNAR                       | 97  | 21 | 11 | 51.56  | b2b3b8y3y6*y6y9y11*y11y14y21                            | 2396.26 | 92.232  | 29457 | 3 | 799.42  | -3.26  |
| [P65882]PURA_SALTY Adenylosuccinate synthetase | 2  |                       | GNNVVVLGTQWGDEGK                            | 1   | 16 | 4  | 25.5   | y1y3y6y11                                               | 1672.83 | 82.502  | 15866 | 3 | 558.28  | -2.12  |
| [P65882]PURA_SALTY Adenylosuccinate synthetase | 3  |                       | VLDDTMAVADILTSMVVDVSDLL<br>DQAR             | 186 | 27 | 21 | 145.06 | b7b8*b8b9*b9b12b17y1y3*y3y4y5y8y9y10y11*y11y12y17y18y27 | 2905.46 | 138.240 | 11570 | 3 | 969.16  | 1.76   |
| [P65882]PURA_SALTY Adenylosuccinate synthetase | 4  |                       | MGNNVVVLGTQWGDEGK                           | 0   | 17 | 4  | 16.93  | b2b4y9y14                                               | 1803.87 | 67.569  | 1927  | 2 | 902.44  | 1.08   |
| [P65882]PURA_SALTY Adenylosuccinate synthetase | 5  |                       | IEELTGVPIDIISTGPDR                          | 402 | 18 | 5  | 22.64  | b3b5y5*y5y10                                            | 1925.05 | 103.417 | 17751 | 2 | 963.03  | 15.73  |
| [P65882]PURA_SALTY Adenylosuccinate synthetase | 6  |                       | TGWLDTVAVR                                  | 307 | 10 | 4  | 42.49  | y3y6y9*y9                                               | 1117.61 | 49.176  | 15091 | 2 | 559.31  | 7.86   |
| [P65882]PURA_SALTY Adenylosuccinate synthetase | 7  | Carbamidomethyl+C(2)  | LCVAYR                                      | 343 | 6  | 1  | 13.91  | b3                                                      | 781.39  | 34.961  | 2564  | 2 | 391.20  | -14.22 |
| [P65882]PURA_SALTY Adenylosuccinate synthetase | 8  |                       | GIGPAYEDK                                   | 132 | 9  | 3  | 39.1   | b6b7b8                                                  | 949.47  | 77.373  | 1588  | 1 | 949.47  | 5.53   |
| [P65882]PURA_SALTY Adenylosuccinate synthetase | 9  |                       | MGNNVVVLGTQWGDEGKGK                         | 0   | 19 | 4  | 29.35  | b5b15y7y8                                               | 1988.98 | 42.482  | 33651 | 4 | 498.00  | -2.15  |
| [P65882]PURA_SALTY Adenylosuccinate synthetase | 10 |                       | VLDDTMAVADILTSMVVDVSDLL<br>DQARQR           | 186 | 29 | 3  | 22.22  | b10b11y23                                               | 3189.62 | 109.917 | 5752  | 3 | 1063.88 | 1.99   |
| [P65882]PURA_SALTY Adenylosuccinate synthetase | 11 | Carbamidomethyl+C(2)  | LCVAYRMPDGR                                 | 343 | 11 | 3  | 25.08  | b7y3y7                                                  | 1337.66 | 55.962  | 5207  | 2 | 669.33  | 11.13  |
| [P65882]PURA_SALTY Adenylosuccinate synthetase | 12 |                       | YVVRYQGGHNAGHTLVINGEK                       | 29  | 21 | 4  | 28.19  | b11b12y12y14                                            | 2312.18 | 83.893  | 4685  | 3 | 771.40  | -4.12  |

|                                                |    |                                         |                                       |     |    |    |        |                                                       |         |         |        |   |         |        |
|------------------------------------------------|----|-----------------------------------------|---------------------------------------|-----|----|----|--------|-------------------------------------------------------|---------|---------|--------|---|---------|--------|
| [P65882 PURA_SALTY Adenylosuccinate synthetase | 13 | Carbamidomethyl+C(11);Phosphoryl STY(8) | AVQLNSLSGFCLTK                        | 318 | 14 | 3  | 19.98  | b3b8y6                                                | 1617.76 | 40.755  | 127181 | 3 | 539.92  | -0.83  |
| [P65882 PURA_SALTY Adenylosuccinate synthetase | 14 | Phosphoryl STY(6)                       | TGWLDTVAVR                            | 307 | 10 | 3  | 27.71  | b4y5_H3PO4 y5y7                                       | 1197.57 | 56.181  | 1865   | 2 | 599.29  | 12.84  |
| [P65882 PURA_SALTY Adenylosuccinate synthetase | 15 | Oxidation+M(9)                          | GVEPIYETMPGWSESTFGVKDR                | 367 | 22 | 4  | 23.78  | b3b4°b4b11                                            | 2501.19 | 69.683  | 13565  | 4 | 626.05  | 8.10   |
| [P65882 PURA_SALTY Adenylosuccinate synthetase | 16 | Oxidation+M(6)                          | VLDDTMAVADILTSMVVDVSDLLDQAR           | 186 | 27 | 4  | 23.09  | b4°b4b8b9                                             | 2921.47 | 123.212 | 4201   | 3 | 974.49  | 7.02   |
| [P65882 PURA_SALTY Adenylosuccinate synthetase | 17 | Oxidation+M(5)                          | LKEVMEYHNFQLVNYYK                     | 161 | 17 | 4  | 24.33  | y3y5*y5y9                                             | 2234.07 | 71.127  | 3149   | 2 | 1117.54 | -13.22 |
| [P65882 PURA_SALTY Adenylosuccinate synthetase | 18 | Oxidation+M(1)                          | MGNNVVVLGTQWGDEGK                     | 0   | 17 | 5  | 27.07  | b5b10*b10b12y15                                       | 1819.88 | 76.009  | 1544   | 4 | 455.73  | 9.79   |
| [P02906 SUBI_SALTY Sulfate-binding protein     | 1  |                                         | QIHWDNDLIKPGVSVITPNPK                 | 126 | 21 | 8  | 46.13  | b5b6b9b14y2y4y5y21                                    | 2371.25 | 73.259  | 104084 | 4 | 593.57  | -11.74 |
| [P02906 SUBI_SALTY Sulfate-binding protein     | 2  |                                         | YLYSPEGQEIAAK                         | 263 | 13 | 21 | 151.62 | b2b3b4°b4b5b6b11y1y2y3y7y8°y8*y8y9*y9y10y11°y11y12y13 | 1468.73 | 51.393  | 73779  | 2 | 734.87  | 0.42   |
| [P02906 SUBI_SALTY Sulfate-binding protein     | 3  |                                         | NVEVLDSGAR                            | 183 | 10 | 7  | 53.01  | b2y5y6y7°y7y8y10                                      | 1059.54 | 40.633  | 70409  | 2 | 530.27  | -7.26  |
| [P02906 SUBI_SALTY Sulfate-binding protein     | 4  |                                         | LFTIDEVFGGWAK                         | 298 | 13 | 9  | 60.99  | b2b3°b3b8y5y6y8y9y13                                  | 1482.76 | 102.437 | 59267  | 2 | 741.89  | 0.58   |
| [P02906 SUBI_SALTY Sulfate-binding protein     | 5  |                                         | WNYLAAWGYALHHNNNDQAK                  | 153 | 20 | 4  | 14.9   | b8b12y7y20                                            | 2386.13 | 93.099  | 30821  | 3 | 796.05  | 8.08   |
| [P02906 SUBI_SALTY Sulfate-binding protein     | 6  |                                         | QATSVINGIEADVVTALAYDVD AIAER          | 66  | 28 | 19 | 148.42 | b2*b2b4b6°b6b9b11b17y3y4y5y6y7y8°y8y9y10y11y13        | 2917.52 | 128.619 | 15544  | 3 | 973.18  | 1.09   |
| [P02906 SUBI_SALTY Sulfate-binding protein     | 7  |                                         | LPDNSAPYTSTIVFLVR                     | 104 | 17 | 4  | 25.58  | b7°b7b9b10                                            | 1892.97 | 60.595  | 4711   | 3 | 631.66  | -22.18 |
| [P02906 SUBI_SALTY Sulfate-binding protein     | 8  |                                         | AVAEAYLK                              | 255 | 8  | 4  | 41.73  | b3b5b6°b6                                             | 864.48  | 93.172  | 3242   | 2 | 432.74  | -7.55  |
| [P02906 SUBI_SALTY Sulfate-binding protein     | 9  |                                         | GIGDVLIAWENEALLATNELGK                | 202 | 22 | 3  | 23.78  | b4b5b12                                               | 2326.22 | 107.010 | 1604   | 2 | 1163.61 | -4.51  |
| [P02906 SUBI_SALTY Sulfate-binding protein     | 10 |                                         | RLPDNSAPYTSTIVFLVR                    | 103 | 18 | 6  | 32.2   | b7b9b12°b12y4y6                                       | 2049.10 | 83.136  | 52349  | 3 | 683.70  | -6.79  |
| [P02906 SUBI_SALTY Sulfate-binding protein     | 11 |                                         | WNYLAAWGYALHHNNNDQAKA QDFVK           | 153 | 26 | 4  | 16.47  | b5b8y4y6                                              | 3074.47 | 66.790  | 3885   | 3 | 1025.50 | 3.02   |
| [P02906 SUBI_SALTY Sulfate-binding protein     | 12 |                                         | NVEVLDSGARGSTNTFVER                   | 183 | 19 | 4  | 15.49  | b7°b7b9y8                                             | 2051.04 | 65.838  | 2513   | 4 | 513.52  | 11.78  |
| [P02906 SUBI_SALTY Sulfate-binding protein     | 13 |                                         | QATSVINGIEADVVTALAYDVD AIAERGR        | 66  | 30 | 5  | 22.53  | b7b8b12*b12y11                                        | 3130.60 | 117.201 | 2474   | 4 | 783.41  | -11.07 |
| [P02906 SUBI_SALTY Sulfate-binding protein     | 14 |                                         | QSHGGSGKQATSVINGIEADVVTLALAYDVD AIAER | 58  | 36 | 3  | 22.59  | b10b11y10                                             | 3655.82 | 135.490 | 2421   | 4 | 914.71  | -9.82  |
| [P02906 SUBI_SALTY Sulfate-binding protein     | 15 |                                         | DIQLNVSYSPTRELYEQYNK                  | 20  | 21 | 9  | 39.33  | b11°b11b12y6*y6y10°y10y11*y11                         | 2601.30 | 99.470  | 1859   | 3 | 867.77  | 6.48   |
| [P0A1H3 EFG_SALTY Elongation factor G          | 1  |                                         | VYSGVVNSGDTVLSVK                      | 337 | 17 | 14 | 105.55 | b1b2b4b5b14y2y3y4y11y12y13y14y15y17                   | 1737.91 | 62.805  | 57493  | 2 | 869.46  | 3.58   |
| [P0A1H3 EFG_SALTY Elongation factor G          | 2  |                                         | IATDPFVGNLTFFR                        | 323 | 14 | 11 | 74.33  | b2b4b5°b5b14y3y7y10y11y12y14                          | 1597.84 | 93.852  | 55516  | 2 | 799.43  | 4.43   |
| [P0A1H3 EFG_SALTY Elongation factor G          | 3  |                                         | IHAEVPLSEMFYATQLR                     | 653 | 18 | 13 | 77.12  | b2b3b4b5b9b11y1y2y4y6y7y13y18                         | 2062.03 | 89.942  | 50194  | 3 | 688.01  | -6.75  |
| [P0A1H3 EFG_SALTY Elongation factor G          | 4  |                                         | SGPLAGYPVVDLGVR                       | 562 | 15 | 14 | 91.56  | b3°b3b5°b5b6°b6b7°b7y3y4y8y10y11y15                   | 1499.83 | 77.260  | 40924  | 2 | 750.42  | 2.52   |
| [P0A1H3 EFG_SALTY Elongation factor G          | 5  |                                         | EFNVEANVGKPVAYR                       | 475 | 16 | 5  | 25.5   | y6y8*y8y12y16                                         | 1820.91 | 54.093  | 36772  | 3 | 607.64  | -9.72  |
| [P0A1H3 EFG_SALTY Elongation factor G          | 6  |                                         | MEFPEPVISIAVEPK                       | 408 | 15 | 6  | 24.83  | b2b12y2y12y13y15                                      | 1685.89 | 86.450  | 35968  | 2 | 843.45  | 5.21   |
| [P0A1H3 EFG_SALTY Elongation factor G          | 7  |                                         | IGEVHDGAATMDWMEQEQR                   | 39  | 20 | 8  | 36.86  | b1b2b12b13y6°y6y7y20                                  | 2332.01 | 62.662  | 25389  | 3 | 778.01  | 3.87   |

|                                       |    |                       |                                |     |    |    |       |                            |         |         |       |   |         |        |
|---------------------------------------|----|-----------------------|--------------------------------|-----|----|----|-------|----------------------------|---------|---------|-------|---|---------|--------|
| [P0A1H3]EFG_SALTY Elongation factor G | 8  |                       | ILFYTGVNHK                     | 29  | 10 | 8  | 53.01 | b10y2y5y6y7y8y10*y10       | 1191.65 | 55.323  | 22334 | 2 | 596.33  | -3.48  |
| [P0A1H3]EFG_SALTY Elongation factor G | 9  |                       | GQYGHVVIDMYPLEPGSNPK           | 512 | 20 | 10 | 60.26 | b2*b2b7*b7b8b11b12y6y9y10  | 2201.07 | 70.801  | 20537 | 3 | 734.36  | -2.00  |
| [P0A1H3]EFG_SALTY Elongation factor G | 10 | Carbamidomethyl+C(20) | AGDIAAAIGLKDVTTGDTLCDPENPIILER | 378 | 30 | 10 | 51.49 | b3b7b9b12b17y3y4y11*y11y13 | 3138.63 | 85.761  | 17404 | 3 | 1046.88 | 8.79   |
| [P0A1H3]EFG_SALTY Elongation factor G | 11 |                       | LGANPVPLQLAIGAEEGFTGVVDLVK     | 161 | 26 | 6  | 18.65 | y1y2y5y7y14y26             | 2607.43 | 120.618 | 16556 | 3 | 869.82  | -3.00  |
| [P0A1H3]EFG_SALTY Elongation factor G | 12 | Carbamidomethyl+C(10) | VLDGAVMVYCAVGGVQPQSETVWR       | 104 | 24 | 6  | 13.12 | b2b14y1y3y10°y10           | 2621.29 | 86.613  | 14755 | 3 | 874.44  | 3.63   |
| [P0A1H3]EFG_SALTY Elongation factor G | 13 |                       | YLGGEELTEEEIK                  | 236 | 13 | 6  | 33.35 | b7b9b10b13y6y13            | 1509.74 | 89.778  | 12043 | 2 | 755.37  | 4.12   |
| [P0A1H3]EFG_SALTY Elongation factor G | 14 | Carbamidomethyl+C(11) | VLNNEILVTCGSAFK                | 255 | 16 | 6  | 42.57 | b1b5b6y6y8y10              | 1777.96 | 79.764  | 11280 | 2 | 889.48  | 3.30   |
| [P0A1H3]EFG_SALTY Elongation factor G | 15 |                       | NIGISAHIDAGK                   | 11  | 12 | 6  | 23.03 | b2b4b6°b6*b6y5             | 1195.65 | 45.603  | 5016  | 3 | 399.22  | 3.47   |
| [P0A1H3]EFG_SALTY Elongation factor G | 16 |                       | GGVIPGEYIPAVDK                 | 541 | 14 | 5  | 39.46 | b3b4y3°y3y4                | 1414.77 | 32.682  | 11309 | 2 | 707.89  | 6.47   |
| [P0A1H3]EFG_SALTY Elongation factor G | 17 |                       | GQESEVTGVK                     | 643 | 10 | 5  | 41.25 | b8y4y6°y6y7                | 1033.51 | 26.166  | 11148 | 2 | 517.26  | -9.21  |
| [P0A1H3]EFG_SALTY Elongation factor G | 18 |                       | VVGQIK                         | 153 | 6  | 1  | 13.91 | b5                         | 643.41  | 45.602  | 10867 | 1 | 643.41  | -7.40  |
| [P0A1H3]EFG_SALTY Elongation factor G | 19 |                       | INIIDTPGHVDFTIEVER             | 83  | 18 | 3  | 16.16 | b9b13y10                   | 2068.07 | 66.883  | 9469  | 4 | 517.77  | -2.48  |
| [P0A1H3]EFG_SALTY Elongation factor G | 20 |                       | LHFGSYHDVDSSELAFK              | 577 | 17 | 4  | 23.85 | b7b9y3y9                   | 1951.92 | 50.568  | 5664  | 3 | 651.31  | 0.94   |
| [P0A1H3]EFG_SALTY Elongation factor G | 21 | Carbamidomethyl+C(9)  | DVTTGDTLCDPENPIILER            | 389 | 19 | 3  | 15.49 | b4b8y10                    | 2158.06 | 71.372  | 3701  | 2 | 1079.53 | 11.09  |
| [P0A1H3]EFG_SALTY Elongation factor G | 22 |                       | GVQAMLDIVIDYLPSPVDVPAINGILDDGK | 273 | 30 | 6  | 25.64 | b8°b8b14y13y15y16          | 3095.66 | 118.768 | 2551  | 3 | 1032.56 | 19.48  |
| [P0A1H3]EFG_SALTY Elongation factor G | 23 |                       | QSGGR                          | 507 | 5  | 1  | 13.53 | b3                         | 504.26  | 47.060  | 2513  | 1 | 504.26  | 14.95  |
| [P0A1H3]EFG_SALTY Elongation factor G | 24 |                       | GITITSAATTAFWSGMAK             | 59  | 18 | 4  | 22.64 | b3b14y5y9                  | 1813.93 | 88.578  | 2189  | 2 | 907.47  | 5.52   |
| [P0A1H3]EFG_SALTY Elongation factor G | 25 |                       | QYEPHR                         | 77  | 6  | 1  | 13.91 | y5                         | 829.40  | 109.161 | 1504  | 1 | 829.40  | 10.08  |
| [P0A1H3]EFG_SALTY Elongation factor G | 26 |                       | ASYTMEFLKYDDAPNNVAQAVIEAR      | 677 | 25 | 8  | 44.32 | b9°b9b12b13y4y5y8y12       | 2816.37 | 84.812  | 63809 | 3 | 939.46  | 4.59   |
| [P0A1H3]EFG_SALTY Elongation factor G | 27 |                       | YLGGEELTEEEIKQALR              | 236 | 17 | 3  | 24.33 | y10y12y15                  | 1978.00 | 74.068  | 59871 | 3 | 660.00  | -8.15  |
| [P0A1H3]EFG_SALTY Elongation factor G | 28 |                       | GITITSAATTAFWSGMAKQYEPHR       | 59  | 24 | 3  | 19.43 | b8b10b13                   | 2624.26 | 76.971  | 59384 | 4 | 656.82  | -10.51 |
| [P0A1H3]EFG_SALTY Elongation factor G | 29 |                       | AKPVLLEPIMKVEVETPEENTGDVIGDLSR | 607 | 30 | 3  | 22.98 | y5y6y8                     | 3278.70 | 84.357  | 30959 | 4 | 820.43  | -5.14  |
| [P0A1H3]EFG_SALTY Elongation factor G | 30 |                       | DTPAERHASDDEPFSAFAFK           | 303 | 20 | 3  | 23.03 | b7b8y11                    | 2204.00 | 43.961  | 16023 | 3 | 735.34  | -11.63 |
| [P0A1H3]EFG_SALTY Elongation factor G | 31 |                       | INIIDTPGHVDFTIEVERSMR          | 83  | 21 | 4  | 14.38 | b3b10y7°y7                 | 2442.28 | 82.492  | 13737 | 3 | 814.77  | 14.89  |
| [P0A1H3]EFG_SALTY Elongation factor G | 32 |                       | NIGISAHIDAGKTTTTER             | 11  | 18 | 3  | 23.57 | b10y3y4                    | 1884.95 | 85.056  | 6990  | 2 | 942.98  | -13.08 |
| [P0A1H3]EFG_SALTY Elongation factor G | 33 |                       | TKADQEK                        | 423 | 7  | 4  | 38.34 | b5°b5y5y6                  | 819.43  | 31.584  | 5988  | 2 | 410.22  | 7.60   |
| [P0A1H3]EFG_SALTY Elongation factor G | 34 |                       | AKVTDIEGK                      | 495 | 9  | 3  | 31.32 | b6y3y8                     | 960.54  | 22.933  | 5941  | 2 | 480.77  | 2.92   |
| [P0A1H3]EFG_SALTY Elongation factor G | 35 | Carbamidomethyl+C(10) | VLDGAVMVYCAVGGVQPQSETVWRQANK   | 104 | 28 | 4  | 17.94 | b5b15b19y8                 | 3062.56 | 83.523  | 5019  | 3 | 1021.53 | 14.11  |
| [P0A1H3]EFG_SALTY Elongation factor G | 36 |                       | QSGGRGQYGHVVIDMYPLEPGSNPK      | 507 | 25 | 5  | 28.57 | b3b5b8b9°b9                | 2686.34 | 92.275  | 2831  | 3 | 896.12  | 13.18  |



|                                                           |    |                                          |                                     |     |    |    |        |                                                          |         |         |        |   |         |        |
|-----------------------------------------------------------|----|------------------------------------------|-------------------------------------|-----|----|----|--------|----------------------------------------------------------|---------|---------|--------|---|---------|--------|
| P0A1H3 EFG_SALTY Elongation factor G                      | 37 |                                          | VWTDEESNQTIAGMGELHLDIIV<br>DRMK     | 446 | 28 | 4  | 12.01  | b5b12*b12y4                                              | 3213.55 | 109.916 | 1898   | 4 | 804.14  | -13.90 |
| P0A1H3 EFG_SALTY Elongation factor G                      | 38 | Phosphoryl STY(11)                       | VYSGVVNSGDTVLSNVK                   | 337 | 17 | 4  | 23.92  | b9y7y8°y8                                                | 1817.87 | 104.541 | 3763   | 2 | 909.44  | 3.76   |
| P0A1H3 EFG_SALTY Elongation factor G                      | 39 | Phosphoryl STY(13)                       | INIIDTPGHVDFTIEVER                  | 83  | 18 | 4  | 16.16  | b11*b11y6y10_H3PO4<br>y10                                | 2148.03 | 118.852 | 2711   | 2 | 1074.52 | -0.11  |
| P0A1H3 EFG_SALTY Elongation factor G                      | 40 | Carbamidomethyl+C(10)<br>;Oxidation+M(7) | VLDGAVMVYCAVGGVQPQSETV<br>WR        | 104 | 24 | 3  | 19.43  | b3b5b12                                                  | 2637.28 | 95.322  | 22305  | 3 | 879.76  | -1.76  |
| P0A1H3 EFG_SALTY Elongation factor G                      | 41 | Oxidation+M(5)                           | GVQAMLDIVIDYLPSPVDVPAIN<br>GILDDGK  | 273 | 30 | 5  | 14.73  | b4b16y5y8°y8                                             | 3111.58 | 95.330  | 6381   | 3 | 1037.87 | -2.82  |
| P0A1H3 EFG_SALTY Elongation factor G                      | 42 |                                          | FYTGTVNHK                           | 31  | 8  | 0  | 1.88   |                                                          | 965.48  | 55.311  | 9879   | 2 | 483.24  | -6.76  |
| P0A1H3 EFG_SALTY Elongation factor G                      | 43 |                                          | LFYTGTVNHK                          | 30  | 9  | 0  | 1.88   |                                                          | 1078.55 | 55.283  | 6431   | 2 | 539.78  | -12.11 |
| P0A1H3 EFG_SALTY Elongation factor G                      | 44 |                                          | EFNVEANVGKPVAYR                     | 475 | 16 | 1  | 7.26   | b10                                                      | 1802.90 | 54.078  | 1571   | 3 | 601.64  | -5.08  |
| P0A7K0 RL11_SALTY 50S ribosomal<br>protein L11            | 1  |                                          | AQLQEIAQTK                          | 103 | 10 | 17 | 88.84  | b2*b2b3*b3b6y2y3°y3y5y<br>6°y6y7°y7*y7y8*y8y10           | 1129.61 | 39.612  | 77821  | 2 | 565.31  | -9.29  |
| P0A7K0 RL11_SALTY 50S ribosomal<br>protein L11            | 2  |                                          | AADMTGADIEAMTR                      | 113 | 14 | 13 | 90.35  | b1b2y4y5°y7y8°y8y9y10y1<br>1y12°y12y14                   | 1452.65 | 58.104  | 61783  | 2 | 726.83  | 5.71   |
| P0A7K0 RL11_SALTY 50S ribosomal<br>protein L11            | 3  |                                          | GLPIPVVITVYADR                      | 51  | 14 | 5  | 34.02  | b3b4y1y6y10                                              | 1512.88 | 91.889  | 32171  | 2 | 756.95  | 2.90   |
| P0A7K0 RL11_SALTY 50S ribosomal<br>protein L11            | 4  |                                          | TPPAAVLLK                           | 72  | 9  | 3  | 31.32  | b4y5y7                                                   | 909.57  | 54.955  | 46211  | 2 | 455.29  | -12.75 |
| P0A7K0 RL11_SALTY 50S ribosomal<br>protein L11            | 5  |                                          | SIEGTARSMGLVVED                     | 127 | 15 | 5  | 30.42  | b4y5°y5y13y14                                            | 1563.78 | 85.135  | 4009   | 2 | 782.39  | 6.48   |
| P0A2C5 RBSB_SALTY D-ribose-binding<br>periplasmic protein | 1  |                                          | ILLINPTSDAVGNAVK                    | 84  | 17 | 18 | 146.13 | b2b3b4b5y2y4y5y8y9y11y<br>12°y12y13°y13*y13y14y15<br>y17 | 1739.96 | 71.561  | 109951 | 2 | 870.49  | 5.12   |
| P0A2C5 RBSB_SALTY D-ribose-binding<br>periplasmic protein | 2  |                                          | IPVITLDR                            | 107 | 8  | 7  | 55.27  | y1y2y4y5y6y7y8                                           | 926.55  | 62.532  | 59876  | 2 | 463.78  | -14.76 |
| P0A2C5 RBSB_SALTY D-ribose-binding<br>periplasmic protein | 3  |                                          | LAATIAQLPDQIGAK                     | 253 | 15 | 14 | 96.21  | b2b3b12y1y2y3y4y7y8y9*<br>y9y10y12y15                    | 1509.86 | 67.145  | 49869  | 2 | 755.43  | -1.05  |
| P0A2C5 RBSB_SALTY D-ribose-binding<br>periplasmic protein | 4  |                                          | VIELQGIAGTSAAR                      | 150 | 14 | 13 | 80.8   | b1b3y1y4y6y7°y7y9y10y12<br>°y12*y12y14                   | 1385.78 | 59.761  | 36544  | 2 | 693.39  | 2.82   |
| P0A2C5 RBSB_SALTY D-ribose-binding<br>periplasmic protein | 5  |                                          | GLNVMQNLLTAHPDVQAVFAQN<br>DEMALGALR | 193 | 31 | 14 | 55.48  | b4b6*b6b15b22y2y4y9y11<br>y12°y12y13°y13y31              | 3336.69 | 103.338 | 32329  | 3 | 1112.90 | 2.41   |
| P0A2C5 RBSB_SALTY D-ribose-binding<br>periplasmic protein | 6  |                                          | IAGDYIAK                            | 135 | 8  | 4  | 41.73  | y3y6y7y8                                                 | 850.46  | 36.191  | 24492  | 2 | 425.73  | -9.90  |
| P0A2C5 RBSB_SALTY D-ribose-binding<br>periplasmic protein | 7  |                                          | ELANVQDLTVR                         | 70  | 11 | 6  | 37.82  | b10y3y5°y5y6y11                                          | 1257.68 | 58.434  | 16734  | 2 | 629.34  | 1.55   |
| P0A2C5 RBSB_SALTY D-ribose-binding<br>periplasmic protein | 8  |                                          | ADVMVVGFDGTPDGEK                    | 231 | 16 | 5  | 29.29  | b5°b5y10y11y14                                           | 1636.76 | 64.444  | 14491  | 2 | 818.89  | 6.34   |
| P0A2C5 RBSB_SALTY D-ribose-binding<br>periplasmic protein | 9  |                                          | GDVVSHIASDNVLGGK                    | 119 | 16 | 5  | 25.21  | b8b12y3y9y16                                             | 1567.80 | 55.372  | 3766   | 2 | 784.40  | -3.43  |
| P0A2C5 RBSB_SALTY D-ribose-binding<br>periplasmic protein | 10 |                                          | GEGFQQAVALAHK                       | 166 | 12 | 4  | 27.01  | b3b4y2y8                                                 | 1242.62 | 35.081  | 3215   | 2 | 621.82  | 0.39   |
| P0A2C5 RBSB_SALTY D-ribose-binding<br>periplasmic protein | 11 |                                          | FNVLASQPADFDR                       | 178 | 13 | 3  | 26.13  | b12y4y5                                                  | 1479.72 | 84.051  | 1876   | 2 | 740.37  | 0.74   |
| P0A2C5 RBSB_SALTY D-ribose-binding<br>periplasmic protein | 12 |                                          | LVIK                                | 291 | 4  | 1  | 13.16  | y3                                                       | 472.35  | 56.835  | 8510   | 1 | 472.35  | -4.97  |
| P0A2C5 RBSB_SALTY D-ribose-binding<br>periplasmic protein | 13 |                                          | GVEVADK                             | 268 | 7  | 4  | 38.34  | b3y5°y5y6                                                | 717.39  | 26.137  | 2675   | 2 | 359.20  | 17.53  |
| P0A2C5 RBSB_SALTY D-ribose-binding<br>periplasmic protein | 14 |                                          | FNVLASQPADFDRTK                     | 178 | 15 | 3  | 26.89  | y5y7y10                                                  | 1708.85 | 60.732  | 17804  | 3 | 570.29  | -8.29  |

|                                                                          |    |                      |                                       |     |    |    |        |                                                   |         |         |        |   |         |        |
|--------------------------------------------------------------------------|----|----------------------|---------------------------------------|-----|----|----|--------|---------------------------------------------------|---------|---------|--------|---|---------|--------|
| P0A2C5 RBSB_SALTY D-ribose-binding periplasmic protein                   | 15 |                      | GTKILLINPTDSDAVGNAVK                  | 81  | 20 | 4  | 14.9   | b3y3y9*y9                                         | 2026.09 | 58.453  | 16513  | 3 | 676.04  | -12.41 |
| P0A2C5 RBSB_SALTY D-ribose-binding periplasmic protein                   | 16 |                      | ALQTAGKADVMVVGFDGTPDGEK               | 224 | 23 | 4  | 19.9   | y7°y7y12y14                                       | 2306.11 | 78.979  | 7782   | 4 | 577.28  | -10.59 |
| P0A2C5 RBSB_SALTY D-ribose-binding periplasmic protein                   | 17 |                      | GEGFQQAVAAHKFNVLASQPADFDR             | 166 | 25 | 6  | 40.33  | y8y9y12*y12y13°y13                                | 2703.36 | 97.869  | 5205   | 3 | 901.79  | 11.47  |
| P0A2C5 RBSB_SALTY D-ribose-binding periplasmic protein                   | 18 |                      | ADVMVVGFDGTPDGEKAVK                   | 231 | 19 | 3  | 22.45  | b3b6b8                                            | 1934.96 | 89.468  | 3312   | 2 | 967.98  | 1.32   |
| P0A2C5 RBSB_SALTY D-ribose-binding periplasmic protein                   | 19 | Oxidation+M(5)       | GLNVMQNLLTAHPDVQAVFAQNDEMALGALR       | 193 | 31 | 4  | 22.27  | b7b8*b8y13                                        | 3352.70 | 90.890  | 2301   | 3 | 1118.24 | 5.39   |
| P0A2C5 RBSB_SALTY D-ribose-binding periplasmic protein                   | 20 |                      | AGDYIAK                               | 136 | 7  | 1  | 9.89   | b6                                                | 737.37  | 36.219  | 2272   | 1 | 737.37  | -14.24 |
| P0A9Y9 CC_SALTY Cold shock-like protein cC                               | 1  |                      | GFGFITPADGSK                          | 15  | 12 | 17 | 159.02 | b2b3b4b5b6°b6y3°y3y4y5y6y7°y7y8y9y10y12           | 1196.59 | 65.011  | 255470 | 2 | 598.80  | -3.57  |
| P0A9Y9 CC_SALTY Cold shock-like protein cC                               | 2  |                      | GFGFITPADGSKDVFVHFSAIQGN GFK          | 15  | 27 | 19 | 146.97 | b2b3b4b5b22y5*y5y6*y6y7y9y10y11y13y21y22y23y25y27 | 2843.38 | 87.772  | 68945  | 4 | 711.60  | -11.51 |
| P0A9Y9 CC_SALTY Cold shock-like protein cC                               | 3  |                      | DVVFVHFSAIQNGNGFK                     | 27  | 15 | 6  | 32.8   | b6b11y10y11*y11y15                                | 1665.84 | 74.007  | 17994  | 2 | 833.42  | 2.20   |
| P0A9Y9 CC_SALTY Cold shock-like protein cC                               | 4  |                      | WFNESKGFGFITPADGSK                    | 9   | 18 | 5  | 35.86  | b12y3y6y7y11                                      | 1987.95 | 76.508  | 25719  | 3 | 663.32  | -4.42  |
| P67093 UG_SALTY Universal stress protein G                               | 1  |                      | HATLPVLVVR                            | 132 | 10 | 13 | 90.6   | b1b2b3°b3b4°b4y1y4y6y7y8y9y10                     | 1104.68 | 60.788  | 110953 | 2 | 552.85  | -5.19  |
| P67093 UG_SALTY Universal stress protein G                               | 2  |                      | TIIMPVDVFEMELSDK                      | 3   | 16 | 12 | 73.63  | b2b3b4b13y1y2y5y9y12y13y14y16                     | 1866.93 | 104.968 | 85736  | 2 | 933.97  | 5.56   |
| P67093 UG_SALTY Universal stress protein G                               | 3  |                      | NPSITTHLLGSNASSVVR                    | 114 | 18 | 6  | 27.48  | b2b13y5y9y10y18                                   | 1852.97 | 59.202  | 43103  | 3 | 618.33  | -7.44  |
| P67093 UG_SALTY Universal stress protein G                               | 4  |                      | LQTMVGHFSDPSR                         | 69  | 14 | 9  | 83.39  | b4*b4b11y3y4y6y7y8y12                             | 1587.77 | 64.069  | 89291  | 3 | 529.93  | -16.07 |
| P67093 UG_SALTY Universal stress protein G                               | 5  |                      | HAEFLAQQDGVIIHLHLVPGSASMSLHR          | 22  | 28 | 6  | 26.46  | b7*b7b12b13y6y8                                   | 3063.53 | 69.252  | 5665   | 4 | 766.64  | -19.44 |
| P67093 UG_SALTY Universal stress protein G                               | 6  |                      | TIIMPVDVFEMELSDKAIR                   | 3   | 19 | 10 | 106.6  | b3y3y4y9y10y11y13y15y16y17                        | 2207.13 | 101.091 | 64318  | 3 | 736.38  | -7.63  |
| P67093 UG_SALTY Universal stress protein G                               | 7  |                      | DVVNEMGEELDADVVGISRNPSITTHLLGSNASSVVR | 94  | 38 | 6  | 21.7   | b3°b3y9*y9y13y14                                  | 3979.95 | 103.376 | 34443  | 5 | 796.80  | -14.29 |
| P67093 UG_SALTY Universal stress protein G                               | 8  |                      | MYKTIIMPVDVFEMELSDK                   | 0   | 19 | 4  | 15.49  | b10y5y9°y9                                        | 2289.10 | 99.357  | 5067   | 3 | 763.70  | -11.41 |
| P67093 UG_SALTY Universal stress protein G                               | 9  | Oxidation+M(11)      | TIIMPVDVFEMELSDK                      | 3   | 16 | 5  | 31.75  | b4b5°b5y3y7                                       | 1882.89 | 63.167  | 1599   | 2 | 941.95  | -14.20 |
| P67093 UG_SALTY Universal stress protein G                               | 10 |                      | IIMPVDVFEMELSDK                       | 4   | 15 | 0  | 4.14   |                                                   | 1765.85 | 104.970 | 1551   | 2 | 883.43  | -12.86 |
| P65889 PUR7_SALTY Phohoribosylaminoimidazole-succinocarboxamide synthase | 1  |                      | LAEAGIPTQMER                          | 60  | 12 | 15 | 113.65 | b1b2b3b4°b4b5°b5b6y6*y6y7y8*y8y9y10               | 1315.66 | 50.731  | 54051  | 2 | 658.34  | -2.60  |
| P65889 PUR7_SALTY Phohoribosylaminoimidazole-succinocarboxamide synthase | 2  |                      | QSLGGLIEAYEAVHR                       | 215 | 16 | 6  | 25.5   | b2°b2y1y5y7y10                                    | 1713.87 | 85.424  | 37192  | 3 | 571.96  | -11.68 |
| P65889 PUR7_SALTY Phohoribosylaminoimidazole-succinocarboxamide synthase | 3  | Carbamidomethyl+C(7) | LLSDTECLVK                            | 72  | 10 | 6  | 29.47  | b2b8°b8y8y9y10                                    | 1177.62 | 53.848  | 36688  | 2 | 589.31  | 4.15   |
| P65889 PUR7_SALTY Phohoribosylaminoimidazole-succinocarboxamide synthase | 4  |                      | TVYSTENPDLLVLEFR                      | 13  | 16 | 8  | 53.09  | b2b3b4y3y4y11y13y16                               | 1895.99 | 89.156  | 23536  | 2 | 948.50  | 5.92   |
| P65889 PUR7_SALTY Phohoribosylaminoimidazole-succinocarboxamide synthase | 5  |                      | LGVEEGMELNPPIFDLFLK                   | 104 | 19 | 4  | 15.49  | b5°b5b9y14                                        | 2161.08 | 121.149 | 3817   | 3 | 721.03  | -19.32 |

|                                                                                 |    |                       |                                     |     |    |    |        |                                             |         |         |       |   |         |        |
|---------------------------------------------------------------------------------|----|-----------------------|-------------------------------------|-----|----|----|--------|---------------------------------------------|---------|---------|-------|---|---------|--------|
| P65889 PUR7_SALTY<br>Phohoribosylaminoimidazole-<br>succinocarboxamide synthase | 6  | Carbamidomethyl+C(9)  | KLEMPVECVVR                         | 82  | 12 | 7  | 60.83  | b5b10b11y3y7*y7y11                          | 1458.78 | 62.688  | 34727 | 2 | 729.89  | 0.84   |
| P65889 PUR7_SALTY<br>Phohoribosylaminoimidazole-<br>succinocarboxamide synthase | 7  |                       | FRQSLGGLIEAYEAVHR                   | 213 | 18 | 3  | 16.16  | b13y7y13                                    | 2017.05 | 79.885  | 23663 | 3 | 673.02  | -5.51  |
| P65889 PUR7_SALTY<br>Phohoribosylaminoimidazole-<br>succinocarboxamide synthase | 8  |                       | TVYSTENPDLLVLEFRNDTSAGD<br>GAR      | 13  | 26 | 5  | 27.5   | b15y3y7y11y20                               | 2840.39 | 81.380  | 13129 | 3 | 947.47  | 6.45   |
| P65889 PUR7_SALTY<br>Phohoribosylaminoimidazole-<br>succinocarboxamide synthase | 9  |                       | NDTSAGDGARIEQFDR                    | 29  | 16 | 3  | 26.17  | y6y12y13                                    | 1751.79 | 72.553  | 12721 | 3 | 584.60  | -1.46  |
| P65889 PUR7_SALTY<br>Phohoribosylaminoimidazole-<br>succinocarboxamide synthase | 10 |                       | LEFGLYKGEVVLGDEFSPDGSR              | 177 | 22 | 3  | 22.66  | b4y13y14                                    | 2414.17 | 96.569  | 5070  | 4 | 604.30  | -7.89  |
| P65889 PUR7_SALTY<br>Phohoribosylaminoimidazole-<br>succinocarboxamide synthase | 11 |                       | GEVVLGDEFSPDGSRLWDK                 | 184 | 19 | 11 | 84.6   | b3b4*b4b7b8b9*b9b10b11<br>y11*y11           | 2106.04 | 76.878  | 3493  | 3 | 702.69  | 13.91  |
| P63411 ACKA_SALTY Acetate kinase                                                | 1  | Carbamidomethyl+C(14) | MLNKPVEELNIITCHLNGGGSVSA<br>IR      | 195 | 26 | 5  | 12.5   | b2b8*b8b10y14                               | 2822.43 | 78.235  | 22980 | 4 | 706.36  | -13.93 |
| P63411 ACKA_SALTY Acetate kinase                                                | 2  |                       | EGTRPAVVPIPTNEELVIAQDASR            | 374 | 23 | 14 | 89.14  | b8b9b14b15b20*b20y5y6y<br>7*y7y14*y14y15y23 | 2465.31 | 69.724  | 21037 | 3 | 822.44  | 2.67   |
| P63411 ACKA_SALTY Acetate kinase                                                | 3  |                       | LGVLGFEVDHER                        | 348 | 12 | 6  | 51.06  | b1b7y3y8y9y10                               | 1370.69 | 68.040  | 19004 | 3 | 457.57  | -14.78 |
| P63411 ACKA_SALTY Acetate kinase                                                | 4  |                       | SGDIDPAIIFHLHDTLGMSVDQINK           | 243 | 25 | 3  | 22.34  | b13b14y17                                   | 2736.35 | 89.230  | 2903  | 3 | 912.79  | -5.98  |
| P63411 ACKA_SALTY Acetate kinase                                                | 5  |                       | DSASFAPLHNPAHLIGIAEALK              | 114 | 22 | 6  | 23.78  | b5*b5b6*b6b11*b11                           | 2272.21 | 83.095  | 10408 | 3 | 758.07  | -0.97  |
| P63411 ACKA_SALTY Acetate kinase                                                | 6  | Carbamidomethyl+C(19) | FAIDAVNGDEYLSGLAECFHLPE<br>AR       | 17  | 26 | 3  | 12.5   | b3b13y11                                    | 2907.37 | 112.362 | 6997  | 3 | 969.79  | -10.66 |
| P63411 ACKA_SALTY Acetate kinase                                                | 7  |                       | YGAHGTSHFYVTQEAAK                   | 178 | 17 | 4  | 24.33  | y5*y5y7y13                                  | 1866.87 | 50.765  | 5669  | 3 | 622.96  | -1.18  |
| P63411 ACKA_SALTY Acetate kinase                                                | 8  |                       | LDAVVFTGGIGENAAMVR                  | 324 | 18 | 3  | 16.16  | b4y4y6                                      | 1819.93 | 83.440  | 4856  | 2 | 910.47  | -3.29  |
| P63411 ACKA_SALTY Acetate kinase                                                | 9  | Carbamidomethyl+C(14) | ESGLLGLTEVTSDCR                     | 272 | 15 | 3  | 26.89  | y8y9y11                                     | 1636.76 | 72.709  | 3356  | 3 | 546.26  | -16.71 |
| P63411 ACKA_SALTY Acetate kinase                                                | 10 | Carbamidomethyl+C(19) | FAIDAVNGDEYLSGLAECFHLPE<br>ARIK     | 17  | 28 | 3  | 22.22  | b15y11y12                                   | 3148.59 | 98.952  | 33571 | 4 | 787.90  | 5.43   |
| P63411 ACKA_SALTY Acetate kinase                                                | 11 | Carbamidomethyl+C(6)  | AMDVYCHRLAK                         | 301 | 11 | 3  | 25.08  | b3y7y9                                      | 1363.65 | 47.947  | 5671  | 3 | 455.22  | -5.55  |
| P63411 ACKA_SALTY Acetate kinase                                                | 12 |                       | YIGSYTALMDGRLLDAVVFTGGIG<br>ENAAMVR | 312 | 30 | 3  | 11.63  | b5b7y10                                     | 3147.57 | 113.652 | 2897  | 3 | 1049.86 | 2.17   |
| P63411 ACKA_SALTY Acetate kinase                                                | 13 |                       | LDAVVFTGGIGENAAMVRELSLG<br>K        | 324 | 24 | 3  | 23.41  | b3b4b9                                      | 2447.28 | 75.226  | 2417  | 3 | 816.43  | -4.69  |
| P63411 ACKA_SALTY Acetate kinase                                                | 14 | Carbamidomethyl+C(18) | MLTKESGLLGLTEVTSDCR                 | 268 | 19 | 6  | 37.16  | b8*b8y9*y9y10y11                            | 2110.05 | 62.060  | 1549  | 3 | 704.02  | 1.04   |
| P63411 ACKA_SALTY Acetate kinase                                                | 15 | Phosphoryl STY(7)     | LDAVVFTGGIGENAAMVR                  | 324 | 18 | 3  | 16.16  | b7y7y10                                     | 1899.88 | 59.958  | 3149  | 2 | 950.44  | -8.22  |
| Q7CPK0 UGPB_SALTY sn-glycerol-3-<br>phohate-binding periplasmic protein ugpB    | 1  |                       | TGYLPITTAAYELTR                     | 343 | 15 | 13 | 104.12 | b3b4b7b10y1y4y5y6y7y9*y<br>9y11y15          | 1669.89 | 85.468  | 98273 | 2 | 835.45  | 3.58   |
| Q7CPK0 UGPB_SALTY sn-glycerol-3-<br>phohate-binding periplasmic protein ugpB    | 2  |                       | LGNMPQIR                            | 389 | 8  | 8  | 68.8   | b3b6y4y5y7*y7y8*y8                          | 928.49  | 48.339  | 56655 | 2 | 464.75  | -10.25 |
| Q7CPK0 UGPB_SALTY sn-glycerol-3-<br>phohate-binding periplasmic protein ugpB    | 3  |                       | TIVDEELESVWTGKK                     | 397 | 15 | 8  | 41.22  | b2b5y3y4y8y13*y13y15                        | 1733.88 | 76.179  | 44660 | 3 | 578.63  | -10.42 |

|                                                                          |    |                      |                                        |     |    |    |        |                                        |         |         |        |   |         |        |
|--------------------------------------------------------------------------|----|----------------------|----------------------------------------|-----|----|----|--------|----------------------------------------|---------|---------|--------|---|---------|--------|
| Q7CPK0 UGPB_SALTY sn-glycerol-3-phohate-binding periplasmic protein ugpB | 4  |                      | AIKPVYEVFKDAGINFDESQFVPT<br>VAGYYTDAK  | 99  | 33 | 9  | 40.38  | b1y1y5°y5y7y8y10y11y33                 | 3682.87 | 94.082  | 37331  | 3 | 1228.29 | 10.08  |
| Q7CPK0 UGPB_SALTY sn-glycerol-3-phohate-binding periplasmic protein ugpB | 5  |                      | TGNAPAILQVYEVGTATMMASK                 | 77  | 22 | 9  | 49.25  | b3°b3b12y5y7y9y12y14y2<br>2            | 2253.15 | 94.762  | 24191  | 2 | 1127.08 | 12.68  |
| Q7CPK0 UGPB_SALTY sn-glycerol-3-phohate-binding periplasmic protein ugpB | 6  |                      | FNQANPDYK                              | 47  | 9  | 6  | 31.32  | b7y2y4y5°y5y9                          | 1096.50 | 29.216  | 21445  | 2 | 548.75  | -5.57  |
| Q7CPK0 UGPB_SALTY sn-glycerol-3-phohate-binding periplasmic protein ugpB | 7  |                      | SGHLLSQPFNSSTPVLYYNK                   | 132 | 20 | 6  | 28.73  | b2b3b6y6y7y20                          | 2252.13 | 68.870  | 18143  | 3 | 751.38  | -1.73  |
| Q7CPK0 UGPB_SALTY sn-glycerol-3-phohate-binding periplasmic protein ugpB | 8  |                      | SGHLLSQPFNSSTPVLYYNKDAFK               | 132 | 24 | 7  | 29.79  | b3b4b7b11y7*y7y24                      | 2713.33 | 107.107 | 18016  | 4 | 679.09  | -12.51 |
| Q7CPK0 UGPB_SALTY sn-glycerol-3-phohate-binding periplasmic protein ugpB | 9  |                      | TIVDEELESVWTGK                         | 397 | 14 | 6  | 55.35  | b8b13y6y10y11y12                       | 1605.81 | 82.969  | 14514  | 2 | 803.41  | 7.07   |
| Q7CPK0 UGPB_SALTY sn-glycerol-3-phohate-binding periplasmic protein ugpB | 10 |                      | FNYGVGMMPYDADIK                        | 282 | 15 | 7  | 75.49  | b5y7y8y10y11y12y13                     | 1720.78 | 75.307  | 13380  | 2 | 860.89  | 6.31   |
| Q7CPK0 UGPB_SALTY sn-glycerol-3-phohate-binding periplasmic protein ugpB | 11 | Carbamidomethyl+C(6) | FYNGDCAMTTASSGSLANIR                   | 258 | 20 | 4  | 24.32  | y4y12y13y20                            | 2135.97 | 61.858  | 9730   | 2 | 1068.49 | 9.60   |
| Q7CPK0 UGPB_SALTY sn-glycerol-3-phohate-binding periplasmic protein ugpB | 12 |                      | FLDFLAKPENAAEWHQK                      | 326 | 17 | 10 | 65.24  | b3y3y4y5y10*y10y11°y11*<br>y11y13      | 2043.99 | 73.872  | 104652 | 4 | 511.75  | -19.23 |
| Q7CPK0 UGPB_SALTY sn-glycerol-3-phohate-binding periplasmic protein ugpB | 13 |                      | QMLNKPLPFTK                            | 374 | 12 | 3  | 30.23  | y4y6y7                                 | 1413.77 | 61.874  | 50103  | 3 | 471.93  | -15.02 |
| Q7CPK0 UGPB_SALTY sn-glycerol-3-phohate-binding periplasmic protein ugpB | 14 |                      | HTALGLALSRAFTGQALAVTTIPF<br>WHSMEGELGK | 5   | 34 | 3  | 16.86  | b3b8b12                                | 3567.85 | 102.319 | 11781  | 4 | 892.72  | -4.11  |
| Q7CPK0 UGPB_SALTY sn-glycerol-3-phohate-binding periplasmic protein ugpB | 15 |                      | AIKPVYEVFK                             | 99  | 10 | 3  | 37.71  | y5y6y7                                 | 1193.68 | 60.329  | 7376   | 3 | 398.56  | -12.17 |
| Q7CPK0 UGPB_SALTY sn-glycerol-3-phohate-binding periplasmic protein ugpB | 16 |                      | GAPQNAIIGGASLWVMQGK                    | 297 | 19 | 3  | 24.67  | y11y13y14                              | 1897.99 | 111.929 | 6348   | 2 | 949.50  | -1.74  |
| Q7CPK0 UGPB_SALTY sn-glycerol-3-phohate-binding periplasmic protein ugpB | 17 |                      | NNGFDGTDAVLEFNKPEQVK                   | 212 | 20 | 9  | 86.6   | b4y3y5*y5y7y10y12y16y1<br>8            | 2222.10 | 66.216  | 5587   | 2 | 1111.55 | 11.76  |
| Q7CPK0 UGPB_SALTY sn-glycerol-3-phohate-binding periplasmic protein ugpB | 18 |                      | HIALLEEMNK                             | 232 | 10 | 3  | 29.47  | b3b4y5                                 | 1197.61 | 58.892  | 4279   | 2 | 599.31  | -18.86 |
| Q7CPK0 UGPB_SALTY sn-glycerol-3-phohate-binding periplasmic protein ugpB | 19 |                      | AGLDPEQPPKTWQELADYTAK                  | 157 | 21 | 14 | 111.52 | b3b4b5b6°b6b7*b7b8y4y5<br>°y5y11y14y17 | 2358.16 | 73.383  | 74935  | 3 | 786.72  | -1.35  |
| Q7CPK0 UGPB_SALTY sn-glycerol-3-phohate-binding periplasmic protein ugpB | 20 |                      | EQGYDKNPGADIATR                        | 358 | 16 | 5  | 55.58  | y3y4y5y8y9                             | 1797.82 | 40.891  | 50285  | 3 | 599.95  | -8.89  |
| Q7CPK0 UGPB_SALTY sn-glycerol-3-phohate-binding periplasmic protein ugpB | 21 |                      | TPQQALDTAVDRGNQLLR                     | 412 | 18 | 3  | 16.16  | b4b10y15                               | 1996.05 | 69.070  | 43745  | 3 | 666.02  | -5.44  |
| Q7CPK0 UGPB_SALTY sn-glycerol-3-phohate-binding periplasmic protein ugpB | 22 |                      | AIKPVYEVFKDAGINFDESQFVPT<br>VAGYYTDAK  | 99  | 33 | 5  | 23.66  | y6°y6y11y13y19                         | 3682.79 | 87.255  | 38995  | 5 | 737.36  | -12.00 |

|                                                                                         |    |                                                      |                                      |     |    |    |        |                                            |         |         |       |   |         |        |
|-----------------------------------------------------------------------------------------|----|------------------------------------------------------|--------------------------------------|-----|----|----|--------|--------------------------------------------|---------|---------|-------|---|---------|--------|
| Q7CPK0 UGPB_SALTY sn-glycerol-3-phohate-binding periplasmic protein ugpB                | 23 |                                                      | TIVDEELESVWTGKK                      | 397 | 15 | 3  | 26.89  | b8b10b12                                   | 1733.88 | 94.521  | 10595 | 2 | 867.44  | -11.12 |
| Q7CPK0 UGPB_SALTY sn-glycerol-3-phohate-binding periplasmic protein ugpB                | 24 |                                                      | EVDSLAQRFNQANPDYK                    | 39  | 17 | 5  | 23.85  | b6b8*b8y11y15                              | 1994.96 | 93.747  | 4402  | 3 | 665.66  | 2.51   |
| Q7CPK0 UGPB_SALTY sn-glycerol-3-phohate-binding periplasmic protein ugpB                | 25 |                                                      | FLDFLAKPENAAEWHQKTGYLPIT<br>TAAYELTR | 326 | 32 | 3  | 17.15  | b4b6b10                                    | 3694.90 | 123.804 | 3123  | 3 | 1232.31 | 3.50   |
| Q7CPK0 UGPB_SALTY sn-glycerol-3-phohate-binding periplasmic protein ugpB                | 26 | Oxidation+M(16)                                      | GAPQNAIIGGASLWVMQGK                  | 297 | 19 | 6  | 32.82  | b4*b4b6y3y4y11                             | 1914.00 | 69.692  | 3898  | 2 | 957.50  | 4.66   |
| P0A1P8 GLRX1_SALTY Glutaredoxin-1                                                       | 1  |                                                      | TVGKPVETVPQIFVDQK                    | 50  | 17 | 11 | 57.38  | b1b3b9y2*y2y5y7y8y11y13y17                 | 1885.03 | 65.606  | 29326 | 3 | 629.01  | -7.38  |
| P0A1P8 GLRX1_SALTY Glutaredoxin-1                                                       | 2  | Carbamidomethyl+C(11)<br>;Carbamidomethyl+C(14)<br>) | MFTVIFGRPGCPYCVR                     | 0   | 16 | 5  | 29.29  | b3b12b13*b13y4                             | 1959.93 | 68.529  | 6542  | 3 | 653.98  | -6.10  |
| P0A1P8 GLRX1_SALTY Glutaredoxin-1                                                       | 3  |                                                      | ADLEK                                | 45  | 5  | 3  | 27.07  | b3*b3y4                                    | 575.30  | 29.395  | 4561  | 1 | 575.30  | -11.14 |
| P0A1P8 GLRX1_SALTY Glutaredoxin-1                                                       | 4  | Carbamidomethyl+C(11)<br>;Carbamidomethyl+C(14)<br>) | MFTVIFGRPGCPYCVRAK                   | 0   | 18 | 5  | 27.48  | b6*b6b7b11y6                               | 2159.09 | 74.265  | 2716  | 3 | 720.37  | 8.48   |
| P0A1P8 GLRX1_SALTY Glutaredoxin-1                                                       | 5  |                                                      | PQIFVDQK                             | 59  | 8  | 0  | 4.52   |                                            | 974.54  | 65.601  | 6871  | 1 | 974.54  | 4.51   |
| Q9L6N1 METE_SALTY 5-methyltetrahydropteroyltriglutamate--homocysteine methyltransferase | 1  | Carbamidomethyl+C(7)                                 | LWVNPDCGLK                           | 719 | 10 | 12 | 102.37 | b2b5b8b9y4y6y7*y7y8*y8y9y10                | 1201.60 | 61.220  | 35932 | 2 | 601.30  | -1.83  |
| Q9L6N1 METE_SALTY 5-methyltetrahydropteroyltriglutamate--homocysteine methyltransferase | 2  |                                                      | QAGIDLLPVGDFAWDHVLTTSL<br>LLGNVPAR   | 52  | 31 | 17 | 105.53 | b2b5°b5*b5b6°b6b7*b7y4y5y6*y6y7y8y24y25y31 | 3351.80 | 119.930 | 34626 | 3 | 1117.94 | 7.14   |
| Q9L6N1 METE_SALTY 5-methyltetrahydropteroyltriglutamate--homocysteine methyltransferase | 3  |                                                      | LAAITAQDSQRENPYEVR                   | 395 | 18 | 9  | 56.39  | b2b3y2y6y13y14y15y16y18                    | 2061.02 | 48.142  | 30267 | 3 | 687.68  | -7.34  |
| Q9L6N1 METE_SALTY 5-methyltetrahydropteroyltriglutamate--homocysteine methyltransferase | 4  | Carbamidomethyl+C(1)                                 | CVKPPVVIGDISRPAPITVEWAK              | 515 | 23 | 9  | 53.82  | b2b3b4b6b7y4y15y20y23                      | 2532.39 | 76.351  | 24628 | 3 | 844.80  | -3.37  |
| Q9L6N1 METE_SALTY 5-methyltetrahydropteroyltriglutamate--homocysteine methyltransferase | 5  |                                                      | DALNSGETAALEEWSAPIQAR                | 360 | 21 | 3  | 21.02  | y5y7y19                                    | 2229.11 | 80.980  | 22858 | 2 | 1115.06 | 13.03  |
| Q9L6N1 METE_SALTY 5-methyltetrahydropteroyltriglutamate--homocysteine methyltransferase | 6  |                                                      | LTWTQLLEEVDALALGHK                   | 137 | 19 | 8  | 48.93  | b2°b2y2y4y6y9y12y15                        | 2166.13 | 119.397 | 20001 | 3 | 722.71  | -6.76  |
| Q9L6N1 METE_SALTY 5-methyltetrahydropteroyltriglutamate--homocysteine methyltransferase | 7  |                                                      | QAIIEQER                             | 466 | 8  | 9  | 41.73  | b2*b2y4°y4y5°y5y6*y6y8                     | 986.52  | 31.553  | 12877 | 2 | 493.76  | -8.66  |
| Q9L6N1 METE_SALTY 5-methyltetrahydropteroyltriglutamate--homocysteine methyltransferase | 8  | Carbamidomethyl+C(1)                                 | CGELALLRDALNSGETAALEEWS<br>APIQAR    | 352 | 29 | 7  | 26.9   | b6°b6y1y3y5y6y8                            | 3141.57 | 104.659 | 12342 | 3 | 1047.86 | 1.94   |
| Q9L6N1 METE_SALTY 5-methyltetrahydropteroyltriglutamate--homocysteine methyltransferase | 9  |                                                      | AQESYWAGNTTR                         | 21  | 12 | 4  | 45.98  | y5y7y8y9                                   | 1383.62 | 41.566  | 11620 | 2 | 692.32  | -3.71  |
| Q9L6N1 METE_SALTY 5-methyltetrahydropteroyltriglutamate--homocysteine methyltransferase | 10 | Carbamidomethyl+C(1)                                 | CGELALLR                             | 352 | 8  | 3  | 36.96  | b3b7y5                                     | 931.50  | 61.213  | 10881 | 2 | 466.25  | -8.26  |
| Q9L6N1 METE_SALTY 5-methyltetrahydropteroyltriglutamate--homocysteine methyltransferase | 11 |                                                      | DALNSGETAALEEWSAPIQARR               | 360 | 22 | 3  | 20.43  | b4b11b13                                   | 2385.16 | 85.886  | 8456  | 3 | 795.72  | -9.72  |

|                                                                                         |    |                       |                                           |     |    |   |       |                     |         |         |       |   |         |        |
|-----------------------------------------------------------------------------------------|----|-----------------------|-------------------------------------------|-----|----|---|-------|---------------------|---------|---------|-------|---|---------|--------|
| Q9L6N1 METE_SALTY 5-methyltetrahydropteroyltriglutamate--homocysteine methyltransferase | 12 |                       | LAAITAQDSQR                               | 395 | 11 | 7 | 36.4  | b2b8b10°b10*b10y3y6 | 1173.61 | 34.779  | 7552  | 2 | 587.31  | -9.78  |
| Q9L6N1 METE_SALTY 5-methyltetrahydropteroyltriglutamate--homocysteine methyltransferase | 13 | Carbamidomethyl+C(8)  | ALWVASSCSLLHSPIDLSVETR                    | 315 | 22 | 4 | 18.96 | b7b10y4y12          | 2441.25 | 80.622  | 1950  | 6 | 407.71  | -1.60  |
| Q9L6N1 METE_SALTY 5-methyltetrahydropteroyltriglutamate--homocysteine methyltransferase | 14 |                       | YAQSLTDKPVK                               | 538 | 11 | 7 | 49.14 | b4b7°b7b8*b8y3y10   | 1249.66 | 31.614  | 26562 | 3 | 417.22  | -17.49 |
| Q9L6N1 METE_SALTY 5-methyltetrahydropteroyltriglutamate--homocysteine methyltransferase | 15 | Carbamidomethyl+C(11) | GMLTGPVTILCWSFPR                          | 549 | 16 | 3 | 25.5  | b5b12b14            | 1834.94 | 100.255 | 17823 | 2 | 917.98  | 4.92   |
| Q9L6N1 METE_SALTY 5-methyltetrahydropteroyltriglutamate--homocysteine methyltransferase | 16 |                       | GWPETR                                    | 731 | 6  | 1 | 13.91 | b3                  | 745.37  | 58.826  | 14904 | 1 | 745.37  | 5.49   |
| Q9L6N1 METE_SALTY 5-methyltetrahydropteroyltriglutamate--homocysteine methyltransferase | 17 |                       | AALANMVK                                  | 737 | 8  | 4 | 50.49 | b4y3y5y6            | 817.45  | 44.108  | 12850 | 2 | 409.23  | -15.31 |
| Q9L6N1 METE_SALTY 5-methyltetrahydropteroyltriglutamate--homocysteine methyltransferase | 18 |                       | ADLTEK                                    | 298 | 6  | 3 | 27.44 | b3°b3y5             | 676.36  | 47.957  | 6361  | 1 | 676.36  | 13.36  |
| Q9L6N1 METE_SALTY 5-methyltetrahydropteroyltriglutamate--homocysteine methyltransferase | 19 |                       | GQQFR                                     | 132 | 5  | 2 | 13.53 | y3*y3               | 635.32  | 42.388  | 4911  | 1 | 635.32  | -2.69  |
| Q9L6N1 METE_SALTY 5-methyltetrahydropteroyltriglutamate--homocysteine methyltransferase | 20 |                       | SDWDAYLEWGVEAFR                           | 611 | 15 | 3 | 26.89 | y7y9y10             | 1843.86 | 70.394  | 2824  | 2 | 922.44  | 19.60  |
| Q9L6N1 METE_SALTY 5-methyltetrahydropteroyltriglutamate--homocysteine methyltransferase | 21 |                       | HWEQQK                                    | 46  | 6  | 1 | 13.91 | y4                  | 855.42  | 139.663 | 2447  | 1 | 855.42  | 12.06  |
| Q9L6N1 METE_SALTY 5-methyltetrahydropteroyltriglutamate--homocysteine methyltransferase | 22 |                       | WFNTNYHYIVPEFSK                           | 117 | 15 | 4 | 37.69 | y3y4y6y10           | 1944.90 | 53.118  | 1853  | 2 | 972.95  | -14.62 |
| Q9L6N1 METE_SALTY 5-methyltetrahydropteroyltriglutamate--homocysteine methyltransferase | 23 |                       | DDVAELHQR                                 | 270 | 9  | 5 | 31.32 | b4°b4b7y8°y8        | 1082.51 | 31.634  | 1647  | 2 | 541.76  | -13.42 |
| Q9L6N1 METE_SALTY 5-methyltetrahydropteroyltriglutamate--homocysteine methyltransferase | 24 |                       | FKLPAPWPTTTIGSFPQTTEIR                    | 420 | 21 | 5 | 22.51 | b3y4y13*y13y15      | 2391.26 | 88.324  | 40187 | 3 | 797.76  | -2.55  |
| Q9L6N1 METE_SALTY 5-methyltetrahydropteroyltriglutamate--homocysteine methyltransferase | 25 |                       | GRAPTGEPAAAAEMTK                          | 101 | 16 | 6 | 51.33 | b7b8b9b11y7y9       | 1557.75 | 36.359  | 17639 | 3 | 519.92  | -10.97 |
| Q9L6N1 METE_SALTY 5-methyltetrahydropteroyltriglutamate--homocysteine methyltransferase | 26 |                       | VKGEPFDR                                  | 172 | 8  | 3 | 33.95 | b7y5y6              | 947.50  | 41.670  | 16637 | 2 | 474.25  | 6.64   |
| Q9L6N1 METE_SALTY 5-methyltetrahydropteroyltriglutamate--homocysteine methyltransferase | 27 | Carbamidomethyl+C(8)  | ALWVASSCSLLHSPIDLSVETRLD<br>TEVK          | 315 | 28 | 4 | 12.01 | b12b14y5°y5         | 3126.63 | 103.527 | 4166  | 4 | 782.41  | 5.78   |
| Q9L6N1 METE_SALTY 5-methyltetrahydropteroyltriglutamate--homocysteine methyltransferase | 28 |                       | GNLDANHRYTGIAEHK                          | 449 | 17 | 3 | 24.33 | b3b8b11             | 1908.97 | 76.106  | 3877  | 2 | 954.99  | -0.45  |
| Q9L6N1 METE_SALTY 5-methyltetrahydropteroyltriglutamate--homocysteine methyltransferase | 29 |                       | RGIEWVQIDEPALVLELPQAWLDA<br>FKPAYDALAGQVK | 200 | 37 | 5 | 15.05 | b12*b12y8y13y21     | 4150.16 | 136.535 | 3766  | 3 | 1384.06 | -9.41  |
| Q9L6N1 METE_SALTY 5-methyltetrahydropteroyltriglutamate--homocysteine methyltransferase | 30 |                       | KAQESYWAGNTTR                             | 20  | 13 | 5 | 21.36 | b4°b4y6°y6y8        | 1511.72 | 35.924  | 2378  | 2 | 756.36  | -4.12  |

|                                                                                         |    |                                          |                                                 |     |    |    |       |                                    |         |         |        |   |         |        |
|-----------------------------------------------------------------------------------------|----|------------------------------------------|-------------------------------------------------|-----|----|----|-------|------------------------------------|---------|---------|--------|---|---------|--------|
| Q9L6N1 METE_SALTY 5-methyltetrahydropteroyltriglutamate--homocysteine methyltransferase | 31 |                                          | GWPETRAALANMVK                                  | 731 | 14 | 3  | 27.76 | b7b8b11                            | 1543.81 | 60.800  | 1704   | 2 | 772.41  | 5.46   |
| Q9L6N1 METE_SALTY 5-methyltetrahydropteroyltriglutamate--homocysteine methyltransferase | 32 | Carbamidomethyl+C(11);Phosphoryl STY(13) | GMLTGPVTILCWSFPREDVTRETI<br>AK                  | 549 | 26 | 3  | 12.5  | b4b11y12                           | 3057.53 | 115.082 | 4721   | 4 | 765.14  | 14.05  |
| Q9L6N1 METE_SALTY 5-methyltetrahydropteroyltriglutamate--homocysteine methyltransferase | 33 | Carbamidomethyl+C(11);Oxidation+M(2)     | GMLTGPVTILCWSFPR                                | 549 | 16 | 3  | 24.33 | b13y7y8                            | 1850.94 | 102.025 | 1805   | 2 | 925.97  | 6.13   |
| Q9L6N1 METE_SALTY 5-methyltetrahydropteroyltriglutamate--homocysteine methyltransferase | 34 |                                          | YWAGNTTR                                        | 25  | 8  | 0  | 2.64  |                                    | 968.44  | 41.540  | 1712   | 1 | 968.44  | -14.18 |
| Q8ZQS2 GPMA_SALTY 2                                                                     | 1  |                                          | AIHTLWNVLDELQAWLPVEK                            | 62  | 21 | 14 | 67.48 | b4°b4b12b17y1y2°y2y4°y4y5y6y7y9*y9 | 2490.30 | 117.997 | 52785  | 3 | 830.77  | -1.37  |
| Q8ZQS2 GPMA_SALTY 2                                                                     | 2  |                                          | VIPYWNDTILPR                                    | 160 | 12 | 6  | 30.23 | b2y2y5y9y10y12                     | 1486.81 | 82.205  | 35771  | 2 | 743.91  | 1.15   |
| Q8ZQS2 GPMA_SALTY 2                                                                     | 3  |                                          | GFAVTPPELTCKDDER                                | 117 | 15 | 7  | 38.39 | b5b12°b12b13y5y9y15                | 1674.83 | 63.779  | 7846   | 3 | 558.95  | -4.81  |
| Q8ZQS2 GPMA_SALTY 2                                                                     | 4  |                                          | EEGFSFDFAYTSVLKR                                | 46  | 16 | 4  | 25.5  | y2y3y10y12                         | 1895.93 | 105.293 | 3853   | 2 | 948.47  | 6.95   |
| Q8ZQS2 GPMA_SALTY 2                                                                     | 5  |                                          | LLKEEGFSDFAYTSVLK                               | 43  | 18 | 3  | 25.08 | b3b7b8                             | 2094.08 | 58.011  | 5294   | 4 | 524.28  | 1.17   |
| Q8ZQS2 GPMA_SALTY 2                                                                     | 6  |                                          | FTGWYDVDLSEKGVSEAK                              | 21  | 18 | 6  | 32.2  | b4b6b9y4°y4y13                     | 2030.99 | 92.154  | 4834   | 2 | 1016.00 | 11.42  |
| Q8ZQS2 GPMA_SALTY 2                                                                     | 7  |                                          | ENRFTGWYDVDLSEK                                 | 18  | 15 | 4  | 26.78 | b4b12y3y9                          | 1858.88 | 84.348  | 3463   | 3 | 620.30  | 12.61  |
| Q8ZQS2 GPMA_SALTY 2                                                                     | 8  |                                          | HYGALQGLNKAETAEK                                | 90  | 16 | 3  | 17.8  | b6b14y11                           | 1729.88 | 91.422  | 1711   | 2 | 865.44  | -6.70  |
| Q8ZQS2 GPMA_SALTY 2                                                                     | 9  |                                          | GFAVTPPELTCKDD                                  | 117 | 13 | 1  | 7.3   | y4                                 | 1389.68 | 63.787  | 7052   | 2 | 695.34  | -10.19 |
| P0A1R8 DBHB_SALTY DNA-binding protein HU-beta                                           | 1  |                                          | NPQTGKEITIAAAK                                  | 61  | 14 | 9  | 43.74 | b7°b7y1y2y3y4y6y8y14               | 1441.78 | 37.055  | 45037  | 3 | 481.26  | -14.90 |
| P0A1R8 DBHB_SALTY DNA-binding protein HU-beta                                           | 2  |                                          | ALDAIIASVTESLKEGDDVALVGF<br>GTFAVK              | 23  | 30 | 9  | 65.54 | b4b5y1y3y4y6y7y8y19                | 3036.62 | 136.207 | 18933  | 3 | 1012.88 | 3.06   |
| P0A1R8 DBHB_SALTY DNA-binding protein HU-beta                                           | 3  |                                          | ALDAIIASVTESLK                                  | 23  | 14 | 3  | 21.43 | b4°b4b5                            | 1430.81 | 98.812  | 5652   | 2 | 715.91  | -1.71  |
| P0A1R8 DBHB_SALTY DNA-binding protein HU-beta                                           | 4  |                                          | IAAGADISK                                       | 9   | 9  | 5  | 66.17 | b4y3y4y7y8                         | 845.46  | 28.927  | 230276 | 2 | 423.23  | -19.92 |
| P0A1R8 DBHB_SALTY DNA-binding protein HU-beta                                           | 5  |                                          | ALDAIIASVTESLKEGDDVALVGF<br>GTFAVK              | 23  | 30 | 3  | 22.98 | y3y7y8                             | 3036.59 | 123.885 | 2965   | 4 | 759.90  | -7.24  |
| P0A2C7 POTD_SALTY ermidine/putrescine-binding periplasmic protein                       | 1  |                                          | EGGIFWMDSLAIPANAK                               | 249 | 17 | 9  | 35.24 | b5°b5b12°b12y5*y5y12y13y17         | 1819.92 | 94.337  | 46115  | 2 | 910.46  | 8.25   |
| P0A2C7 POTD_SALTY ermidine/putrescine-binding periplasmic protein                       | 2  |                                          | LINFLLRPDVAKEVAETIGYPTPNL<br>AAR                | 273 | 28 | 6  | 17.94 | b2b3y6y8y13*y13                    | 3081.67 | 99.108  | 44870  | 4 | 771.17  | -13.55 |
| P0A2C7 POTD_SALTY ermidine/putrescine-binding periplasmic protein                       | 3  |                                          | QAGTPLEVWVWPK                                   | 237 | 12 | 3  | 23.03 | b10y5y8                            | 1324.73 | 75.861  | 34493  | 2 | 662.87  | -0.65  |
| P0A2C7 POTD_SALTY ermidine/putrescine-binding periplasmic protein                       | 4  |                                          | EVAETIGYPTPNLAAR                                | 285 | 16 | 8  | 59.78 | b6b8°b8y1y8y9y10y11                | 1701.89 | 61.812  | 29770  | 2 | 851.45  | 4.66   |
| P0A2C7 POTD_SALTY ermidine/putrescine-binding periplasmic protein                       | 5  |                                          | QAGTPLEVWVPKEGGIFWMDSLA<br>IPANAK               | 237 | 29 | 8  | 26.03 | b7b8°b8b13y2y3y5*y5                | 3125.64 | 105.188 | 14829  | 3 | 1042.55 | 9.14   |
| P0A2C7 POTD_SALTY ermidine/putrescine-binding periplasmic protein                       | 6  |                                          | LTNFHNLDPEMLNKPFDPNNDYS<br>VPYIWGATAIGVNSDAIDPK | 103 | 43 | 9  | 42.77 | b2b8b13b24y2y7y8y10y11             | 4803.33 | 95.456  | 13774  | 4 | 1201.59 | 5.29   |
| P0A2C7 POTD_SALTY ermidine/putrescine-binding periplasmic protein                       | 7  |                                          | TITSWADLWKPEYK                                  | 146 | 14 | 6  | 62.04 | b9y4y5y7y9y11                      | 1737.86 | 82.975  | 62814  | 3 | 579.96  | -13.63 |
| P0A2C7 POTD_SALTY ermidine/putrescine-binding periplasmic protein                       | 8  |                                          | VIYSTYESNETMYAK                                 | 53  | 15 | 3  | 18.81 | b3b8y8                             | 1798.83 | 52.320  | 8392   | 2 | 899.92  | 5.77   |

|                                                                         |    |                    |                                           |     |    |    |       |                                               |         |         |       |   |         |        |
|-------------------------------------------------------------------------|----|--------------------|-------------------------------------------|-----|----|----|-------|-----------------------------------------------|---------|---------|-------|---|---------|--------|
| P0A2C7 POTD_SALTY<br>ermidine/putrescine-binding periplasmic<br>protein | 9  |                    | EGMIQK                                    | 92  | 6  | 1  | 13.91 | b4                                            | 705.36  | 41.526  | 4382  | 1 | 705.36  | -5.54  |
| P0A2C7 POTD_SALTY<br>ermidine/putrescine-binding periplasmic<br>protein | 10 |                    | LGYSGN'TTDPK                              | 179 | 11 | 4  | 42.59 | b7b8b9y9                                      | 1152.54 | 31.086  | 3498  | 2 | 576.78  | -8.37  |
| P0A2C7 POTD_SALTY<br>ermidine/putrescine-binding periplasmic<br>protein | 11 |                    | KLMPNVAAFNSDNPANPYMEGE<br>VNLGMVWNGSAFVAR | 200 | 37 | 5  | 10.93 | b13°b13y13°y13y25                             | 4010.90 | 110.797 | 4776  | 3 | 1337.64 | 0.43   |
| P0A2C7 POTD_SALTY<br>ermidine/putrescine-binding periplasmic<br>protein | 12 |                    | DGAYDLVVPSTYYVDKMR                        | 73  | 18 | 3  | 23.32 | b3b8b12                                       | 2092.01 | 81.193  | 4051  | 2 | 1046.51 | 1.98   |
| P0A2C7 POTD_SALTY<br>ermidine/putrescine-binding periplasmic<br>protein | 13 |                    | LGYSGN'TTDPKEIAAYEELK                     | 179 | 21 | 3  | 14.38 | b7y5y12                                       | 2328.12 | 104.290 | 3782  | 3 | 776.71  | -1.15  |
| P0A2C7 POTD_SALTY<br>ermidine/putrescine-binding periplasmic<br>protein | 14 |                    | QAGTPLEVVPKEGGIFWMDSLA<br>IPANAK          | 237 | 29 | 4  | 17.5  | b3b13b21y5                                    | 3125.57 | 113.648 | 3162  | 3 | 1042.53 | -14.53 |
| P0A2C7 POTD_SALTY<br>ermidine/putrescine-binding periplasmic<br>protein | 15 | Phosphoryl STY(10) | EVAETIGYPTPNLAAR                          | 285 | 16 | 6  | 52.37 | b6b7b8°b8b9y8                                 | 1781.86 | 56.310  | 26767 | 3 | 594.63  | 13.56  |
| P0A2C7 POTD_SALTY<br>ermidine/putrescine-binding periplasmic<br>protein | 16 | Phosphoryl STY(10) | SLYPDAQTISK                               | 312 | 11 | 5  | 28.09 | b8°b8b9y6°y6                                  | 1302.60 | 31.154  | 1975  | 2 | 651.81  | 12.28  |
| P0A2C7 POTD_SALTY<br>ermidine/putrescine-binding periplasmic<br>protein | 17 | Phosphoryl STY(6)  | EIEAAYEELK                                | 190 | 10 | 3  | 37.71 | b3b4b5                                        | 1274.55 | 28.750  | 1667  | 2 | 637.78  | 1.25   |
| P0A2A3 RL1_SALTY 50S ribosomal<br>protein L1                            | 1  |                    | VVGQLGQVLGPR                              | 122 | 12 | 14 | 85.91 | b1b2b5y1y2y3y4y5y7*y7y<br>8y10*y10y12         | 1222.72 | 59.795  | 96125 | 2 | 611.86  | -5.59  |
| P0A2A3 RL1_SALTY 50S ribosomal<br>protein L1                            | 2  |                    | VGTVTPNVAEAVK                             | 141 | 13 | 15 | 98.06 | b3°b3b4°b4b13y3y7*y7y8y<br>9y10*y10y12*y12y13 | 1284.71 | 48.859  | 92647 | 2 | 642.86  | -0.95  |
| P0A2A3 RL1_SALTY 50S ribosomal<br>protein L1                            | 3  |                    | VAVFTQGPNAEAAK                            | 74  | 14 | 5  | 45.76 | y7y8y10y11y14                                 | 1402.73 | 45.913  | 84288 | 2 | 701.87  | -0.61  |
| P0A2A3 RL1_SALTY 50S ribosomal<br>protein L1                            | 4  |                    | FNESVDVAVNLGIDAR                          | 37  | 16 | 3  | 17.8  | b4b14y5                                       | 1718.87 | 77.696  | 6424  | 3 | 573.63  | 1.56   |
| P0A2A3 RL1_SALTY 50S ribosomal<br>protein L1                            | 5  |                    | AAGAELVGMEDLADQIK                         | 88  | 17 | 5  | 54.71 | y7y9y10y11y12                                 | 1730.87 | 80.413  | 14167 | 2 | 865.94  | 5.36   |
| P0A2A3 RL1_SALTY 50S ribosomal<br>protein L1                            | 6  |                    | GATVLPHGTTGR                              | 60  | 11 | 12 | 86.21 | b3°b3b4°b4b5°b5y4°y4y5y<br>6°y6y7             | 1065.57 | 30.043  | 14083 | 2 | 533.29  | -8.48  |
| P0A2A3 RL1_SALTY 50S ribosomal<br>protein L1                            | 7  |                    | KGEMNFDVVIASPDAMR                         | 105 | 17 | 7  | 35.24 | b5°b5b10°b10y4y5y7                            | 1879.88 | 41.064  | 44567 | 3 | 627.30  | -12.34 |
| P0A2A3 RL1_SALTY 50S ribosomal<br>protein L1                            | 8  | Oxidation+M(9)     | AAGAELVGMEDLADQIK                         | 88  | 17 | 4  | 24.33 | b5°b5b7b12                                    | 1746.88 | 77.479  | 12826 | 2 | 873.94  | 9.92   |
| P0A2A3 RL1_SALTY 50S ribosomal<br>protein L1                            | 9  | Oxidation+M(9)     | AAGAELVGMEDLADQIKK                        | 88  | 18 | 5  | 33.47 | b5°b5b7b12b13                                 | 1874.93 | 77.502  | 8926  | 3 | 625.65  | -12.70 |
| P22107 TRAT_SALTY TraT complement<br>resistance protein                 | 1  |                    | NTSDKDMSDLQSLIAK                          | 58  | 16 | 9  | 51.33 | b9b12y2y3y4y5y9*y11y16                        | 1765.85 | 66.243  | 73439 | 3 | 589.29  | -7.12  |
| P22107 TRAT_SALTY TraT complement<br>resistance protein                 | 2  |                    | ATVTTDNVAALR                              | 177 | 12 | 9  | 81.81 | b3°b3b4y4y5y6y8y9y12                          | 1231.66 | 46.276  | 43015 | 2 | 616.33  | -4.06  |
| P22107 TRAT_SALTY TraT complement<br>resistance protein                 | 3  |                    | NTSDKDMSDLQSLIAKDIAK                      | 58  | 21 | 7  | 14.38 | b5y1y2y3*y3y19y21                             | 2321.16 | 76.079  | 41845 | 3 | 774.39  | -2.63  |
| P22107 TRAT_SALTY TraT complement<br>resistance protein                 | 4  |                    | GYTVVTTSPDK                               | 79  | 10 | 8  | 57    | b2b3°b3b9y4y5y6y10                            | 1066.54 | 36.767  | 15296 | 2 | 533.77  | -3.89  |
| P22107 TRAT_SALTY TraT complement<br>resistance protein                 | 5  |                    | FEEAKPVLEEQLAK                            | 223 | 14 | 5  | 11.37 | b2b10°b10y9y14                                | 1630.87 | 53.972  | 11412 | 2 | 815.94  | 2.47   |
| P22107 TRAT_SALTY TraT complement<br>resistance protein                 | 6  |                    | AYYWIQANVLK                               | 89  | 11 | 3  | 25.08 | b7y6y8                                        | 1368.73 | 78.041  | 25971 | 2 | 684.87  | 2.41   |



|                                                      |    |                                           |                               |     |    |    |        |                                                         |         |         |        |   |         |        |
|------------------------------------------------------|----|-------------------------------------------|-------------------------------|-----|----|----|--------|---------------------------------------------------------|---------|---------|--------|---|---------|--------|
| P22107 TRAT_SALTY TraT complement resistance protein | 7  |                                           | IQTSTETGNQHK                  | 196 | 12 | 7  | 37.23  | b7°b7b8y4*y4y7*y7                                       | 1343.67 | 95.973  | 1755   | 2 | 672.34  | 8.81   |
| P22107 TRAT_SALTY TraT complement resistance protein | 8  |                                           | VNLKFEEAKPVLEEQLAK            | 219 | 18 | 5  | 25.72  | b8*b8y3y7y9                                             | 2085.15 | 63.051  | 43350  | 3 | 695.72  | -4.92  |
| P22107 TRAT_SALTY TraT complement resistance protein | 9  |                                           | GYTVVTSPPDKAYYWIQANVLK        | 79  | 21 | 4  | 19.74  | b3b12y5y9                                               | 2416.24 | 89.460  | 35499  | 3 | 806.09  | -4.55  |
| P22107 TRAT_SALTY TraT complement resistance protein | 10 |                                           | TKATVTTDNVAALR                | 175 | 14 | 3  | 28.55  | y3y5y10                                                 | 1460.79 | 69.682  | 7797   | 2 | 730.90  | -10.19 |
| P22107 TRAT_SALTY TraT complement resistance protein | 11 |                                           | MDLRESQGWLNR                  | 103 | 12 | 5  | 45.98  | b4b6b10b11°b11                                          | 1504.72 | 136.484 | 1813   | 1 | 1504.72 | -6.90  |
| P22107 TRAT_SALTY TraT complement resistance protein | 12 | Carbamidomethyl+C(16)<br>;Oxidation+M(19) | LMMVTLVSSTLALSGCGAMSTAI<br>KK | 5   | 25 | 3  | 22.34  | b5y10y11                                                | 2586.36 | 76.985  | 267154 | 3 | 862.79  | 6.89   |
| P22107 TRAT_SALTY TraT complement resistance protein | 13 | Carbamidomethyl+C(16)<br>;Oxidation+M(19) | LMMVTLVSSTLALSGCGAMSTAI<br>K  | 5   | 24 | 4  | 13.12  | b6°b6y15y17                                             | 2458.24 | 98.002  | 8186   | 4 | 615.32  | 0.99   |
| O54297 RS4_SALTY 30S ribosomal protein S4            | 1  |                                           | AALELAEQR                     | 156 | 9  | 8  | 46.61  | b3y1y2y4y5y6°y6y9                                       | 1000.53 | 43.921  | 42398  | 2 | 500.77  | -11.96 |
| O54297 RS4_SALTY 30S ribosomal protein S4            | 2  |                                           | VVNIASYQVSPNDVVSIR            | 128 | 18 | 13 | 99.49  | b12b15y4y8y9y10y11*y11<br>y13*y13y14y16y18              | 1960.07 | 72.913  | 33353  | 2 | 980.54  | 8.41   |
| O54297 RS4_SALTY 30S ribosomal protein S4            | 3  |                                           | VVNIASYQVSPNDVVSIREK          | 128 | 20 | 9  | 53.85  | b3b14y5°y10y11y12y15y1<br>9y20                          | 2217.18 | 66.777  | 22997  | 3 | 739.73  | -2.97  |
| O54297 RS4_SALTY 30S ribosomal protein S4            | 4  | Carbamidomethyl+C(1)                      | CKIEQAPGQHGAR                 | 31  | 13 | 5  | 46.88  | b4b6b8b9y8                                              | 1451.70 | 57.454  | 13570  | 3 | 484.57  | -11.94 |
| P02936 OMPA_SALTY Outer membrane protein A           | 1  | Carbamidomethyl+C(13)                     | GMGESNPVTGNTCDNVKPR           | 302 | 19 | 16 | 150.2  | b3y2y3y5y7y8y9y11°y11y1<br>2y13°y13y14y15y17y19         | 2032.89 | 38.213  | 83163  | 3 | 678.30  | -11.59 |
| P02936 OMPA_SALTY Outer membrane protein A           | 2  |                                           | GVKDVVTQPQA                   | 339 | 11 | 9  | 53.91  | b4°b4b6b8*b8y1y4y6y11                                   | 1141.61 | 37.787  | 59695  | 2 | 571.31  | -8.13  |
| P02936 OMPA_SALTY Outer membrane protein A           | 3  | Carbamidomethyl+C(6)                      | AALIDCLAPDR                   | 321 | 11 | 11 | 83.99  | b2b3b6°b6y3y4°y4y5y7y8y<br>11                           | 1214.62 | 62.682  | 30403  | 2 | 607.81  | -3.22  |
| P02936 OMPA_SALTY Outer membrane protein A           | 4  |                                           | LGYPITDDLVDYTR                | 103 | 14 | 3  | 28.55  | y4y7y9                                                  | 1640.82 | 76.810  | 12869  | 2 | 820.91  | 0.37   |
| P02936 OMPA_SALTY Outer membrane protein A           | 5  | Carbamidomethyl+C(6)                      | AALIDCLAPDRR                  | 321 | 12 | 4  | 27.01  | b5b6y7°y7                                               | 1370.72 | 41.619  | 4569   | 3 | 457.58  | -1.16  |
| P02936 OMPA_SALTY Outer membrane protein A           | 6  |                                           | AQSVVDYLSK                    | 281 | 11 | 3  | 36.84  | y7y8y9                                                  | 1222.66 | 72.784  | 39890  | 2 | 611.84  | -2.80  |
| P02936 OMPA_SALTY Outer membrane protein A           | 7  |                                           | FGQQEAAPVVAPAPAPEVQTK         | 194 | 23 | 3  | 13.49  | b4y8y10                                                 | 2303.25 | 54.835  | 7279   | 2 | 1152.13 | 19.72  |
| P02936 OMPA_SALTY Outer membrane protein A           | 8  |                                           | DGSVVVLGFTDR                  | 255 | 12 | 4  | 23.03  | b4y5°y5y10                                              | 1264.68 | 87.799  | 2680   | 2 | 632.84  | 21.24  |
| P02936 OMPA_SALTY Outer membrane protein A           | 9  |                                           | IGSDAYNQGLSEK                 | 267 | 13 | 4  | 21.36  | b6b8*b8y11                                              | 1381.63 | 110.677 | 1637   | 2 | 691.32  | -20.76 |
| P02936 OMPA_SALTY Outer membrane protein A           | 10 |                                           | GIPSDKISAR                    | 292 | 10 | 3  | 34.7   | y3y7y8                                                  | 1043.58 | 32.224  | 18703  | 2 | 522.29  | -7.37  |
| P02936 OMPA_SALTY Outer membrane protein A           | 11 |                                           | IGSDAYNQGLSEKR                | 267 | 14 | 4  | 25.42  | b3b4y11°y11                                             | 1537.78 | 63.158  | 2625   | 2 | 769.39  | 12.86  |
| P67904 RS10_SALTY 30S ribosomal protein S10          | 1  |                                           | LIDQSTAEIVETAKR               | 16  | 15 | 19 | 164.14 | b3°b3b9°b9°b9y1y3y4y5y6<br>°y6y7y8y9y10y11y12y13y1<br>5 | 1673.88 | 52.755  | 111531 | 3 | 558.63  | -14.80 |
| P67904 RS10_SALTY 30S ribosomal protein S10          | 2  |                                           | LIDQSTAEIVETAK                | 16  | 14 | 14 | 90.2   | b2b3b4b5y2y4°y4y5y9°y9y<br>10°y10y11y14                 | 1517.81 | 56.279  | 64277  | 2 | 759.41  | 0.88   |
| P67904 RS10_SALTY 30S ribosomal protein S10          | 3  |                                           | LVDIVEPTEK                    | 72  | 10 | 8  | 79.11  | b2b3y3y4y6y8y9y10                                       | 1142.62 | 52.519  | 34302  | 2 | 571.81  | -7.37  |
| P67904 RS10_SALTY 30S ribosomal protein S10          | 4  |                                           | LIDQSTAEIVETAKR               | 16  | 15 | 3  | 26.89  | b3b7b11                                                 | 1673.91 | 49.791  | 58893  | 4 | 419.23  | 2.99   |
| P67904 RS10_SALTY 30S ribosomal protein S10          | 5  |                                           | GPIPLPTRK                     | 37  | 9  | 4  | 46.61  | b3y4y5y6                                                | 978.60  | 43.577  | 38394  | 2 | 489.80  | -10.42 |

|                                             |    |                                      |                                        |     |    |    |        |                                       |         |         |        |   |         |        |
|---------------------------------------------|----|--------------------------------------|----------------------------------------|-----|----|----|--------|---------------------------------------|---------|---------|--------|---|---------|--------|
| P67904 RS10_SALTY 30S ribosomal protein S10 | 6  |                                      | RLVDIVEPTEK                            | 71  | 11 | 7  | 66.65  | b3b4b7y4y5°y5y6                       | 1298.73 | 51.290  | 38049  | 2 | 649.87  | -3.29  |
| P0A7X0 RS8_SALTY 30S ribosomal protein S8   | 1  |                                      | SMQDPIADMLTR                           | 1   | 12 | 14 | 160.27 | b2b3b4b9b10y3y4y5y6y8y9y10y11y12      | 1377.65 | 78.827  | 108518 | 2 | 689.33  | -0.44  |
| P0A7X0 RS8_SALTY 30S ribosomal protein S8   | 2  |                                      | AAVTMPSSK                              | 22  | 9  | 3  | 39.1   | y3y6y7                                | 891.46  | 31.983  | 86605  | 2 | 446.23  | -0.96  |
| P0A7X0 RS8_SALTY 30S ribosomal protein S8   | 3  |                                      | AVVESIQR                               | 69  | 8  | 13 | 64.03  | b2b6°b6y1y2*y2y3y4y5°y5y6y8*y8        | 901.50  | 33.364  | 58533  | 2 | 451.25  | -12.80 |
| P0A7X0 RS8_SALTY 30S ribosomal protein S8   | 4  |                                      | VSRPGLR                                | 77  | 7  | 4  | 41.35  | b5°b5y4y6                             | 784.47  | 22.975  | 21875  | 2 | 392.74  | -15.87 |
| Q7CPE2 ATPB_SALTY ATP synthase subunit beta | 1  |                                      | QLDPLVVGQEHYDTAR                       | 343 | 16 | 14 | 104.63 | b2*b2y3°y3y4y5y6y8y9y10°y10y11y16*y16 | 1840.90 | 58.459  | 73881  | 3 | 614.31  | -8.29  |
| Q7CPE2 ATPB_SALTY ATP synthase subunit beta | 2  |                                      | VALTGLTMAEK                            | 219 | 11 | 8  | 102.75 | b3y3y4y5y7y8y9y10                     | 1133.62 | 59.979  | 52904  | 2 | 567.31  | -5.71  |
| Q7CPE2 ATPB_SALTY ATP synthase subunit beta | 3  |                                      | TVNMMELIR                              | 156 | 9  | 7  | 55.64  | b2°b2y3y5y6y7y9                       | 1106.56 | 76.536  | 42294  | 2 | 553.78  | -8.49  |
| Q7CPE2 ATPB_SALTY ATP synthase subunit beta | 4  |                                      | YTLAGTEVSALLGR                         | 247 | 14 | 9  | 31.75  | b1b2°b2b9y2y6y10y11y14                | 1450.79 | 80.606  | 40208  | 2 | 725.90  | 0.17   |
| Q7CPE2 ATPB_SALTY ATP synthase subunit beta | 5  |                                      | GLDVKDLLEHPIEVPVGK                     | 65  | 17 | 7  | 16.93  | b3b9°b9y1y2y12y17                     | 1844.99 | 67.906  | 35700  | 3 | 615.67  | -10.32 |
| Q7CPE2 ATPB_SALTY ATP synthase subunit beta | 6  |                                      | AAPSYEELSNSQELLETKIK                   | 112 | 20 | 4  | 23.03  | b12b13y4y20                           | 2179.10 | 74.519  | 34884  | 2 | 1090.05 | 10.64  |
| Q7CPE2 ATPB_SALTY ATP synthase subunit beta | 7  |                                      | GIMEGEYDHLPEQAFYMVGSIDE AVEK           | 429 | 27 | 10 | 53.49  | b2b4y5y6°y6y9y11y12y13y27             | 3057.41 | 100.298 | 34341  | 3 | 1019.81 | 7.67   |
| Q7CPE2 ATPB_SALTY ATP synthase subunit beta | 8  |                                      | TIAMGSSDGLRR                           | 53  | 12 | 6  | 23.03  | b2b11y1y4y10y12                       | 1263.64 | 37.705  | 33957  | 2 | 632.33  | -2.99  |
| Q7CPE2 ATPB_SALTY ATP synthase subunit beta | 9  |                                      | VGLFGGAGVGK                            | 145 | 11 | 8  | 37.82  | b2b9y1y2y4y7y8y11                     | 961.54  | 59.640  | 33956  | 2 | 481.27  | -5.78  |
| Q7CPE2 ATPB_SALTY ATP synthase subunit beta | 10 |                                      | QIASLGIYPAVDPLDSTSR                    | 324 | 19 | 6  | 39     | y4y11y12°y12y13y19                    | 2003.07 | 81.242  | 32725  | 2 | 1002.04 | 12.19  |
| Q7CPE2 ATPB_SALTY ATP synthase subunit beta | 11 |                                      | FLSQPFFVAEVFTGSPGK                     | 399 | 18 | 12 | 44.68  | b2b3°b3b9°b9y3y7y9°y9y16°y16y18       | 1958.02 | 100.303 | 28213  | 2 | 979.51  | 7.86   |
| Q7CPE2 ATPB_SALTY ATP synthase subunit beta | 12 |                                      | VYDALEVQNGNEK                          | 25  | 13 | 7  | 21.36  | b3y2y8°y8y11°y11y13                   | 1478.72 | 45.133  | 25856  | 2 | 739.86  | 2.23   |
| Q7CPE2 ATPB_SALTY ATP synthase subunit beta | 13 | Carbamidomethyl+C(6)                 | VIDLMCPFAK                             | 132 | 10 | 6  | 40.46  | b2b6b8y5y8y10                         | 1193.61 | 81.344  | 24721  | 2 | 597.31  | 0.72   |
| Q7CPE2 ATPB_SALTY ATP synthase subunit beta | 14 |                                      | NIAIEHSGYSVFAGVGER                     | 165 | 18 | 5  | 33.47  | y5y10y11y13y18                        | 1905.94 | 66.644  | 13107  | 3 | 635.98  | -5.19  |
| Q7CPE2 ATPB_SALTY ATP synthase subunit beta | 15 |                                      | MPSAVGYQPTLAEEMGVLQER                  | 261 | 21 | 3  | 14.38  | b7y4y6                                | 2306.14 | 82.224  | 25109  | 2 | 1153.57 | 10.16  |
| Q7CPE2 ATPB_SALTY ATP synthase subunit beta | 16 |                                      | TGSITSVQAVYVPADDLTDPSPAT TFAHLDATVVLRS | 287 | 37 | 4  | 23.26  | b6b8°b8b9                             | 3816.00 | 89.678  | 12637  | 5 | 764.00  | 16.19  |
| Q7CPE2 ATPB_SALTY ATP synthase subunit beta | 17 |                                      | VSLVYGMNEPPGNR                         | 202 | 15 | 3  | 26.89  | y6y11y12                              | 1660.80 | 67.603  | 3048   | 3 | 554.27  | -4.78  |
| Q7CPE2 ATPB_SALTY ATP synthase subunit beta | 18 |                                      | YQELK                                  | 367 | 5  | 1  | 13.53  | b4                                    | 680.37  | 45.808  | 2935   | 1 | 680.37  | 5.29   |
| Q7CPE2 ATPB_SALTY ATP synthase subunit beta | 19 | Carbamidomethyl+C(26)                | AAPSYEELSNSQELLETKIKVIDLM CPFAK        | 112 | 30 | 12 | 90.37  | b5°b5b7b8y4y5y6y7y8y10y16y28          | 3353.68 | 121.228 | 38780  | 3 | 1118.57 | 5.61   |
| Q7CPE2 ATPB_SALTY ATP synthase subunit beta | 20 | Oxidation+M(11)                      | IMNVLGEPVDMK                           | 87  | 12 | 4  | 23.03  | b6b9°b9y4                             | 1361.68 | 34.069  | 24926  | 3 | 454.57  | 3.32   |
| Q7CPE2 ATPB_SALTY ATP synthase subunit beta | 21 | Oxidation+M(4)                       | TIAMGSSDGLR                            | 53  | 11 | 4  | 37.82  | b3b5b6y9                              | 1123.53 | 88.150  | 6125   | 1 | 1123.53 | -8.15  |
| Q7CPE2 ATPB_SALTY ATP synthase subunit beta | 22 | Carbamidomethyl+C(6); Oxidation+M(5) | VIDLMCPFAK                             | 132 | 10 | 3  | 27.71  | b5y5y8                                | 1209.58 | 60.828  | 4733   | 3 | 403.87  | -13.62 |
| Q7CPE2 ATPB_SALTY ATP synthase subunit beta | 23 |                                      | GYSVFAGVGER                            | 172 | 11 | 0  | 4.9    |                                       | 1141.56 | 66.677  | 20641  | 2 | 571.28  | -6.10  |
| Q7CPE2 ATPB_SALTY ATP synthase subunit beta | 24 |                                      | AMGSSDGLRR                             | 55  | 10 | 0  | 2.64   |                                       | 1049.51 | 37.713  | 14947  | 2 | 525.26  | -1.63  |

|                                                                          |    |                      |                              |     |    |    |       |                                  |         |         |       |   |         |        |
|--------------------------------------------------------------------------|----|----------------------|------------------------------|-----|----|----|-------|----------------------------------|---------|---------|-------|---|---------|--------|
| [Q7CPE2]ATPB_SALTY ATP synthase subunit beta                             | 25 |                      | DVKDLEHPIEVPVGK              | 67  | 15 | 6  | 34.64 | b4b7°b7b8b11°b11                 | 1674.89 | 67.895  | 4011  | 3 | 558.97  | -8.60  |
| [Q7CPE2]ATPB_SALTY ATP synthase subunit beta                             | 26 |                      | QLDPLVVQGEHYDTAR             | 343 | 16 | 0  | 4.14  |                                  | 1822.88 | 58.481  | 2406  | 3 | 608.30  | -12.32 |
| [P0A1S4]STPA_SALTY DNA-binding protein stpA                              | 1  |                      | MNLMLQNLNNIR                 | 0   | 12 | 9  | 57.82 | b2b3b4b9y4*y6y9y10y12            | 1473.77 | 76.912  | 19580 | 2 | 737.39  | 0.17   |
| [P0A1S4]STPA_SALTY DNA-binding protein stpA                              | 2  |                      | ADGINPEELFAMDSAMPR           | 66  | 18 | 12 | 66.72 | b2b3b8b11°b11b15°b15y2y4y8y10y14 | 1963.91 | 89.615  | 19490 | 2 | 982.46  | 12.93  |
| [P0A1S4]STPA_SALTY DNA-binding protein stpA                              | 3  |                      | EFSIDVLEEMLEK                | 19  | 13 | 3  | 30.6  | b5b8b12                          | 1581.78 | 104.408 | 10276 | 2 | 791.39  | 3.32   |
| [P0A1S4]STPA_SALTY DNA-binding protein stpA                              | 4  |                      | TPKPIAQALAAGK                | 113 | 13 | 3  | 21.36 | b4y4y10                          | 1265.74 | 46.862  | 8066  | 3 | 422.58  | -16.01 |
| [P0A1S4]STPA_SALTY DNA-binding protein stpA                              | 5  |                      | INAFLELMKADGINPEELFAMDSA MPR | 57  | 27 | 4  | 27.79 | y3y9y10y13                       | 3023.49 | 113.023 | 8521  | 3 | 1008.50 | 6.14   |
| [P0A1S4]STPA_SALTY DNA-binding protein stpA                              | 6  |                      | EFSIDVLEEMLEKFR              | 19  | 15 | 6  | 38.39 | b3°b3b12y3y7y8                   | 1884.93 | 114.116 | 7015  | 3 | 628.98  | -6.54  |
| [P0A1S4]STPA_SALTY DNA-binding protein stpA                              | 7  |                      | AMAREFSIDVLEEMLEK            | 15  | 17 | 5  | 16.93 | b10y4°y4y7°y7                    | 2011.00 | 65.251  | 5310  | 3 | 671.01  | 7.47   |
| [P0A1S4]STPA_SALTY DNA-binding protein stpA                              | 8  | Oxidation+M(3)       | NLMLQNLNNIR                  | 1   | 11 | 3  | 25.08 | b8y6y9                           | 1358.71 | 47.440  | 4757  | 2 | 679.86  | -7.10  |
| [Q8ZL48]COAD_SALTY Phohopantetheine adenylyltransferase                  | 1  |                      | ATAHLGNVEVVGFSDLMANFAR DR    | 57  | 24 | 7  | 39.67 | b9°b9b13b14y3y10y11              | 2590.25 | 74.683  | 4640  | 4 | 648.32  | -14.51 |
| [Q8ZL48]COAD_SALTY Phohopantetheine adenylyltransferase                  | 2  |                      | AVADFEYEMQLAHMNR             | 91  | 16 | 9  | 45.74 | b2b3b11°b11y4*y4y5y6*y6          | 1924.88 | 76.088  | 4636  | 4 | 481.98  | 5.20   |
| [Q8ZL48]COAD_SALTY Phohopantetheine adenylyltransferase                  | 3  |                      | HQGDVTHFLPDNVHQALMDK         | 137 | 20 | 8  | 14.9  | b2°b2b6y4y7*y7y8°y8*             | 2302.12 | 59.762  | 4366  | 4 | 576.29  | 7.00   |
| [Q8ZL48]COAD_SALTY Phohopantetheine adenylyltransferase                  | 4  |                      | KPMFTLDER                    | 42  | 9  | 5  | 31.32 | b3b9y3y7y9                       | 1136.57 | 34.054  | 3012  | 2 | 568.79  | -10.10 |
| [Q8ZL48]COAD_SALTY Phohopantetheine adenylyltransferase                  | 5  |                      | ATQMFDHVILAIASPSKKPMFTL DER  | 24  | 27 | 4  | 15.98 | b7b9y6y21                        | 3017.60 | 136.512 | 2828  | 4 | 755.16  | 13.84  |
| [Q8ZL48]COAD_SALTY Phohopantetheine adenylyltransferase                  | 6  |                      | ATAHLGNVEVVGFSDLMANFAR       | 57  | 22 | 4  | 22.66 | b4y9y10°y10                      | 2319.20 | 84.137  | 1557  | 2 | 1160.10 | 17.37  |
| [Q8ZL48]COAD_SALTY Phohopantetheine adenylyltransferase                  | 7  | Phosphoryl.STY(7)    | EWSFISSSLVK                  | 122 | 11 | 3  | 32.07 | b3b5b6                           | 1362.63 | 33.394  | 1852  | 2 | 681.82  | 1.25   |
| [Q8ZL48]COAD_SALTY Phohopantetheine adenylyltransferase                  | 8  |                      | ATAHLGNVEVVGFSDLMANFA        | 57  | 21 | 0  | 7.16  |                                  | 2163.04 | 74.679  | 14705 | 3 | 721.69  | -5.08  |
| [Q8ZL48]COAD_SALTY Phohopantetheine adenylyltransferase                  | 9  |                      | HVILAIASPSKKPMFTLDER         | 30  | 21 | 0  | 8.29  |                                  | 2324.27 | 136.564 | 2260  | 3 | 775.43  | -2.73  |
| [P02911]ARGT_SALTY Lysine-arginine-ornithine-binding periplasmic protein | 1  | Carbamidomethyl+C(1) | CTWVASDFDALIPSLK             | 66  | 16 | 8  | 42.57 | b3°b3b5b12°b12y3y4y16            | 1822.91 | 98.801  | 56487 | 2 | 911.96  | 5.76   |
| [P02911]ARGT_SALTY Lysine-arginine-ornithine-binding periplasmic protein | 2  |                      | IGTDTTYAPFSSK                | 29  | 13 | 8  | 64.39 | b12y5y6°y6y9y10y12y13            | 1387.68 | 53.846  | 33339 | 2 | 694.34  | 0.88   |
| [P02911]ARGT_SALTY Lysine-arginine-ornithine-binding periplasmic protein | 3  |                      | HVGVLQGSTQEAYANDNWR          | 134 | 19 | 8  | 57.14 | b4b11y3*y6y7y8y9y19              | 2145.00 | 54.178  | 33170 | 3 | 715.67  | -3.98  |
| [P02911]ARGT_SALTY Lysine-arginine-ornithine-binding periplasmic protein | 4  |                      | EYAFAGPSVK                   | 198 | 10 | 6  | 34.7  | b1b3b4°b4b6y10                   | 1068.54 | 30.030  | 5173  | 2 | 534.78  | 8.00   |

|                                                                         |    |                       |                                 |     |    |    |        |                                                       |         |         |       |   |         |        |
|-------------------------------------------------------------------------|----|-----------------------|---------------------------------|-----|----|----|--------|-------------------------------------------------------|---------|---------|-------|---|---------|--------|
| P02911 ARGT_SALTY Lysine-arginine-ornithine-binding periplasmic protein | 5  |                       | GVDVVAYANQDLIYSDLTAGR           | 155 | 21 | 3  | 14.38  | b6b14y17                                              | 2240.13 | 73.378  | 4299  | 3 | 747.38  | 2.51   |
| P02911 ARGT_SALTY Lysine-arginine-ornithine-binding periplasmic protein | 6  | Carbamidomethyl+C(15) | GEFIGFDIDLGEMCK                 | 45  | 16 | 5  | 42.57  | b10b11y10y13y15                                       | 1844.85 | 79.817  | 34516 | 3 | 615.62  | 16.81  |
| P02911 ARGT_SALTY Lysine-arginine-ornithine-binding periplasmic protein | 7  |                       | YFGDGTGVGLR                     | 211 | 11 | 5  | 49.14  | b3b9b10y7y9                                           | 1141.56 | 56.564  | 22005 | 2 | 571.29  | -0.21  |
| P02911 ARGT_SALTY Lysine-arginine-ornithine-binding periplasmic protein | 8  |                       | QQEIAFSDK                       | 99  | 9  | 6  | 46.1   | b5*b5b7y3y5°y5                                        | 1065.54 | 80.765  | 5984  | 2 | 533.28  | 21.08  |
| P02911 ARGT_SALTY Lysine-arginine-ornithine-binding periplasmic protein | 9  |                       | GSPIQPTLESLK                    | 120 | 12 | 3  | 23.03  | b4y4y8                                                | 1269.70 | 62.476  | 1681  | 2 | 635.36  | -0.77  |
| P02911 ARGT_SALTY Lysine-arginine-ornithine-binding periplasmic protein | 10 |                       | GSPIQPTLESKKGK                  | 120 | 14 | 3  | 19.98  | b6y9y12                                               | 1454.82 | 54.473  | 20965 | 2 | 727.92  | 1.51   |
| P02911 ARGT_SALTY Lysine-arginine-ornithine-binding periplasmic protein | 11 |                       | ALTELQDGTYDK                    | 234 | 13 | 3  | 21.36  | b12y5y11                                              | 1509.76 | 39.501  | 13568 | 2 | 755.38  | 3.56   |
| P02911 ARGT_SALTY Lysine-arginine-ornithine-binding periplasmic protein | 12 |                       | QPAGKEYAFAGPSVK                 | 193 | 15 | 3  | 18.81  | b12y9y12                                              | 1549.81 | 75.287  | 2903  | 2 | 775.41  | 5.75   |
| P02911 ARGT_SALTY Lysine-arginine-ornithine-binding periplasmic protein | 13 |                       | IGTDTTYAPFSSKDAK                | 29  | 16 | 5  | 36.71  | b6b12y7y8y10                                          | 1701.83 | 113.549 | 1700  | 2 | 851.42  | 0.50   |
| P02911 ARGT_SALTY Lysine-arginine-ornithine-binding periplasmic protein | 14 | Phosphoryl STY(5)     | IGTDTTYAPFSSKDAK                | 29  | 16 | 4  | 35.2   | y9°y9y10y11                                           | 1781.81 | 89.617  | 2847  | 2 | 891.41  | 10.07  |
| Q8ZRP4 DAPD_SALTY 2                                                     | 1  |                       | EAVNQVISLLDSGALR                | 28  | 16 | 11 | 65.17  | b2b4*b4b6°b6b12y4y5y9y10y16                           | 1684.93 | 92.663  | 47496 | 2 | 842.97  | 3.69   |
| Q8ZRP4 DAPD_SALTY 2                                                     | 2  |                       | MQQLQNVIAFER                    | 0   | 14 | 12 | 76.09  | b3b4y1y7y9y10°y10y11°y11y12*y12y14                    | 1706.86 | 86.533  | 44567 | 2 | 853.93  | 5.36   |
| Q8ZRP4 DAPD_SALTY 2                                                     | 3  |                       | INDNQVIDGAESR                   | 68  | 13 | 8  | 79.45  | y1y5y6y7y9y10y11y13                                   | 1430.69 | 41.887  | 21013 | 2 | 715.85  | 2.56   |
| Q8ZRP4 DAPD_SALTY 2                                                     | 4  |                       | FADYDEAR                        | 89  | 8  | 5  | 50.49  | b4y2y5y6y7                                            | 986.42  | 34.995  | 13513 | 2 | 493.71  | -3.16  |
| Q8ZRP4 DAPD_SALTY 2                                                     | 5  |                       | YFDK                            | 81  | 4  | 1  | 13.16  | y3                                                    | 572.28  | 116.036 | 1588  | 1 | 572.28  | 11.52  |
| Q8ZRP4 DAPD_SALTY 2                                                     | 6  |                       | IYDRETGEVHYGR                   | 213 | 13 | 4  | 30.7   | b5b12y9y11                                            | 1594.78 | 58.069  | 13877 | 3 | 532.27  | 12.55  |
| Q8ZRP4 DAPD_SALTY 2                                                     | 7  |                       | YFDKVPMK                        | 81  | 8  | 4  | 36.96  | b4°b4b7y3                                             | 1027.52 | 43.383  | 13633 | 2 | 514.26  | -11.17 |
| Q8ZRP4 DAPD_SALTY 2                                                     | 8  |                       | RADITPANVDTVTR                  | 14  | 14 | 3  | 19.98  | b10b12y8                                              | 1528.83 | 99.476  | 10413 | 2 | 764.92  | 13.73  |
| Q8ZRP4 DAPD_SALTY 2                                                     | 9  |                       | VPAGSVVVSNGNLPKDGK              | 226 | 18 | 6  | 25.72  | b6b9b11*b11y6°y6                                      | 1710.94 | 44.319  | 1959  | 2 | 855.97  | -1.43  |
| Q8ZKP7 TPIS_SALTY Triosephohate isomerase                               | 1  | Carbamidomethyl+C(8)  | ELTGVAGCDVAIAPPEMYIDLAKR        | 28  | 24 | 9  | 26.89  | b2°b2b5b8y1y11°y11y12y24                              | 2589.31 | 83.418  | 49955 | 3 | 863.78  | 2.07   |
| Q8ZKP7 TPIS_SALTY Triosephohate isomerase                               | 2  |                       | SATPAQAQAVHK                    | 176 | 12 | 21 | 112.68 | b2b3°b3b5°b5b12y1y2y4y5*y5y6y7*y7y8*y8y9*y9y10°y10y12 | 1208.63 | 19.807  | 42529 | 2 | 604.82  | -7.68  |
| Q8ZKP7 TPIS_SALTY Triosephohate isomerase                               | 3  | Carbamidomethyl+C(9)  | KELTGVAGCDVAIAPPEMYIDLAK        | 27  | 24 | 4  | 17.6   | b10b16y9y13                                           | 2561.31 | 103.587 | 3806  | 3 | 854.44  | 4.77   |
| Q8ZKP7 TPIS_SALTY Triosephohate isomerase                               | 4  |                       | TQGAAAFEGAVIA YEPVWAIGTGK       | 152 | 24 | 7  | 31.71  | b4b8b15*b15y4y9y11                                    | 2407.26 | 94.351  | 39042 | 2 | 1204.14 | 14.40  |
| Q8ZKP7 TPIS_SALTY Triosephohate isomerase                               | 5  | Carbamidomethyl+C(8)  | ELTGVAGCDVAIAPPEMYIDLAK         | 28  | 23 | 3  | 13.49  | b7y3y10                                               | 2433.23 | 88.978  | 8209  | 2 | 1217.12 | 12.14  |
| Q8ZKP7 TPIS_SALTY Triosephohate isomerase                               | 6  |                       | DIGAQYIIIGHSER                  | 84  | 14 | 5  | 19.98  | b11*b11y5°y5y9                                        | 1571.83 | 65.436  | 4922  | 2 | 786.42  | 7.46   |
| Q8ZKP7 TPIS_SALTY Triosephohate isomerase                               | 7  |                       | AAAGSHIMLGAQNVDNLSGAFTGETSAEMLK | 52  | 32 | 8  | 29.97  | b5b8b9y7°y7y11°y11y12y1                               | 3204.54 | 136.470 | 1641  | 4 | 801.89  | -7.69  |

|                                             |    |                                             |                                           |     |    |    |        |                                                                           |         |         |        |   |         |        |
|---------------------------------------------|----|---------------------------------------------|-------------------------------------------|-----|----|----|--------|---------------------------------------------------------------------------|---------|---------|--------|---|---------|--------|
| Q8ZKP7 TPIS_SALTY Triosephohate isomerase   | 8  | Carbamidomethyl+C(9); Carbamidomethyl+C(26) | EQGLTPVLCIGETEAENEAGKTEE VCAR             | 117 | 28 | 16 | 141.39 | b5°b5b12y3y4y5y6y9y10y12y16y20y21y23y24y26                                | 3090.45 | 73.031  | 105735 | 3 | 1030.82 | 4.82   |
| Q8ZKP7 TPIS_SALTY Triosephohate isomerase   | 9  | Oxidation+M()                               | AAAGSHIMLGAQNVDLNLSGAFT GETSAEMLK         | 52  | 32 | 3  | 22.31  | b9b10y10                                                                  | 3220.57 | 85.792  | 9349   | 4 | 805.90  | 4.02   |
| Q8ZKP7 TPIS_SALTY Triosephohate isomerase   | 10 |                                             | TPAQAAVHK                                 | 178 | 10 | 6  | 30.23  | b3°b3b7°b7b8°b8                                                           | 1050.56 | 19.809  | 17055  | 2 | 525.78  | -7.55  |
| Q8ZKP7 TPIS_SALTY Triosephohate isomerase   | 11 |                                             | PAQAAVHK                                  | 179 | 9  | 8  | 62.52  | b3°b3b4°b4b5b6°b6b8                                                       | 949.51  | 19.805  | 14025  | 2 | 475.26  | -10.28 |
| Q7CR46 IRAP_SALTY Anti-adaptor protein iraP | 1  |                                             | QVEGALEGVKPDASVPDHDTELL R                 | 50  | 24 | 10 | 54.33  | b9°b9b24y3y7°y7y9y12y14y19                                                | 2575.28 | 60.392  | 39286  | 4 | 644.58  | -7.87  |
| Q7CR46 IRAP_SALTY Anti-adaptor protein iraP | 2  |                                             | NMAQNEQEMLIR                              | 38  | 12 | 11 | 67.61  | b2°b2b3y5y8°y8y9°y9y10y11y12                                              | 1476.70 | 56.683  | 32442  | 2 | 738.85  | 2.81   |
| Q7CR46 IRAP_SALTY Anti-adaptor protein iraP | 3  |                                             | QVEGALEGVKPDASVPDHDTELL RQYVK             | 50  | 28 | 5  | 12.01  | b5°b5b14y12°y12                                                           | 3093.57 | 103.292 | 10081  | 4 | 774.15  | -3.95  |
| Q8ZLD7 UA_SALTY Universal stress protein A  | 1  |                                             | AVSMARPYNAK                               | 22  | 11 | 14 | 56.92  | b2b9°b9b10y1y2y5°y5y7°y7y9°y9°y9y11                                       | 1207.62 | 31.625  | 81407  | 2 | 604.31  | -4.04  |
| Q8ZLD7 UA_SALTY Universal stress protein A  | 2  |                                             | QLINTVHVDMLIVPLRDEEE                      | 124 | 20 | 15 | 68.51  | b2°b2b10°b10b11°b11y1y6y7y8y9°y9y12y20°y20                                | 2363.22 | 87.073  | 80525  | 3 | 788.41  | -2.17  |
| Q8ZLD7 UA_SALTY Universal stress protein A  | 3  |                                             | ISEETHHALTELSTNAGYPITETLS GSGDLGQVLVDAIK  | 61  | 39 | 8  | 12.49  | b1b6°b6b12°b12y3y14y39                                                    | 4067.05 | 98.386  | 79020  | 4 | 1017.52 | 0.00   |
| Q8ZLD7 UA_SALTY Universal stress protein A  | 4  |                                             | ISEETHHALTELSTNAGYPITETLS GSGDLGQVLVDAIKK | 61  | 40 | 7  | 21.34  | b9b15b17b22y2y4y22                                                        | 4195.16 | 94.714  | 29756  | 4 | 1049.55 | 5.00   |
| Q8ZLD7 UA_SALTY Universal stress protein A  | 5  |                                             | ISLIHVDVNYSDLYTGLIDVNLGD MQKR             | 33  | 28 | 7  | 17.94  | b13°b13y1y6y12°y12y18                                                     | 3191.63 | 107.038 | 10344  | 4 | 798.66  | -2.37  |
| Q8ZLD7 UA_SALTY Universal stress protein A  | 6  | Carbamidomethyl+C(9)                        | KYDMDLVVCGHHQDFWSK                        | 100 | 18 | 3  | 16.16  | b7b12y3                                                                   | 2265.05 | 68.450  | 7406   | 3 | 755.69  | 10.89  |
| Q8ZLD7 UA_SALTY Universal stress protein A  | 7  |                                             | SMARPYNAK                                 | 24  | 9  | 4  | 32.07  | b4°b4b6b7                                                                 | 1037.51 | 31.620  | 90501  | 2 | 519.26  | -5.29  |
| Q8ZLD7 UA_SALTY Universal stress protein A  | 8  |                                             | VSMARPYNAK                                | 23  | 10 | 3  | 8.01   | b8°b8°b8                                                                  | 1136.58 | 31.621  | 8520   | 2 | 568.79  | -8.27  |
| Q8ZLD7 UA_SALTY Universal stress protein A  | 9  |                                             | LINTVHVDMLIVPLRDEEE                       | 125 | 19 | 0  | 5.65   |                                                                           | 2235.14 | 87.037  | 2657   | 3 | 745.72  | -11.80 |
| Q8ZLD7 UA_SALTY Universal stress protein A  | 10 |                                             | AVSMARPYNAK                               | 22  | 11 | 0  | 2.26   |                                                                           | 1189.60 | 31.611  | 5381   | 3 | 397.21  | -6.67  |
| Q8ZP65 TPX_SALTY Probable thiol peroxidase  | 1  |                                             | SQTVHFQGNPVTVANVIPQAGSK                   | 1   | 23 | 22 | 119.17 | b5b8°b8b9°b9b11°b11b12°b12b13°b13y2y4y6°y6y7y9y10y11y12°y12y23            | 2379.24 | 65.332  | 98691  | 3 | 793.75  | -0.62  |
| Q8ZP65 TPX_SALTY Probable thiol peroxidase  | 2  |                                             | AQAFTLVAK                                 | 24  | 9  | 7  | 66.17  | b4y2y3y4y6y7y9                                                            | 948.54  | 53.852  | 61506  | 2 | 474.77  | -9.65  |
| Q8ZP65 TPX_SALTY Probable thiol peroxidase  | 3  | Carbamidomethyl+C(13)                       | VLNIFPSIDTGVCAASVR                        | 48  | 18 | 7  | 27.48  | b2b3y10y13°y13y14y18                                                      | 1919.02 | 85.912  | 50534  | 2 | 960.01  | 7.44   |
| Q8ZP65 TPX_SALTY Probable thiol peroxidase  | 4  | Carbamidomethyl+C(2)                        | FCGAEGLSNVITLSTLR                         | 93  | 17 | 11 | 68.78  | b2b3b11b12°b12y4y6y12y14y15y17                                            | 1837.96 | 86.648  | 37432  | 2 | 919.49  | 8.90   |
| Q8ZP65 TPX_SALTY Probable thiol peroxidase  | 5  |                                             | DLSDVSLSQYAGK                             | 33  | 13 | 10 | 56.22  | b2b5b7°b7y1y5y9y11y12y13                                                  | 1382.69 | 60.123  | 34106  | 2 | 691.85  | 5.39   |
| Q8ZP65 TPX_SALTY Probable thiol peroxidase  | 6  |                                             | NYGVEIVDGPLK                              | 116 | 12 | 6  | 38.32  | b2b3y4y8y10y12                                                            | 1303.69 | 65.551  | 13306  | 2 | 652.35  | -3.18  |
| Q8ZP65 TPX_SALTY Probable thiol peroxidase  | 7  | Carbamidomethyl+C(15)                       | FNQLATEVENTVVLCSADLPFA QSR                | 67  | 26 | 3  | 12.5   | b5y4y6                                                                    | 2908.43 | 110.704 | 2309   | 4 | 727.86  | -5.54  |
| Q8ZP65 TPX_SALTY Probable thiol peroxidase  | 8  |                                             | AVIVLDENDNVIFSQLVDEITHEPD YDAALNVLKA      | 133 | 35 | 27 | 230.2  | b3b4b5b6b7b10b11°b11b16b18b22y3y5y6y7y8y12y13°y13y18y20y22y24y28y29y30y31 | 3883.00 | 120.693 | 78267  | 3 | 1295.00 | 7.80   |
| Q8ZP65 TPX_SALTY Probable thiol peroxidase  | 9  |                                             | NNEFLKNYGVEIVDGPLK                        | 110 | 18 | 4  | 33.47  | b3b4b7b10                                                                 | 2049.05 | 76.889  | 12168  | 3 | 683.69  | -6.31  |

|                                               |    |                                                     |                                           |     |    |    |        |                                          |         |         |        |   |         |        |
|-----------------------------------------------|----|-----------------------------------------------------|-------------------------------------------|-----|----|----|--------|------------------------------------------|---------|---------|--------|---|---------|--------|
| Q8ZP65 TPX_SALTY Probable thiol peroxidase    | 10 | Phosphoryl STY(13)                                  | MSQTVHFQGNPVTVANVIPQAGS<br>K              | 0   | 24 | 5  | 13.12  | b5*b5b12*b12y12                          | 2590.21 | 98.520  | 8394   | 4 | 648.31  | -9.80  |
| Q8ZP65 TPX_SALTY Probable thiol peroxidase    | 11 | Oxidation+M(1)                                      | MSQTVHFQGNPVTVANVIPQAGS<br>K              | 0   | 24 | 3  | 19.43  | y7y9y13                                  | 2526.28 | 76.096  | 5748   | 3 | 842.76  | 0.87   |
| P05989 ILVC_SALTY Ketol-acid reductoisomerase | 1  |                                                     | GFGVPTLIAVHPENDPQEGEMAIA<br>K             | 167 | 25 | 11 | 57.23  | b2b3b4y1y2y7y8y9y14y21<br>y25            | 2548.28 | 77.867  | 41539  | 3 | 850.10  | -0.77  |
| P05989 ILVC_SALTY Ketol-acid reductoisomerase | 2  |                                                     | AYALSEQLKEIMAPLFQK                        | 284 | 18 | 6  | 25.72  | b2b3y3y5y16y18                           | 2080.10 | 103.721 | 30337  | 3 | 694.04  | -7.63  |
| P05989 ILVC_SALTY Ketol-acid reductoisomerase | 3  |                                                     | ANYFNTLNL                                 | 1   | 10 | 10 | 76.1   | b2*b2b3y3y4y6y7y8y10*y<br>10             | 1225.63 | 68.528  | 28692  | 2 | 613.32  | -2.49  |
| P05989 ILVC_SALTY Ketol-acid reductoisomerase | 4  |                                                     | DGAALGYSHGFNIVEVGEQIR                     | 123 | 21 | 6  | 21.02  | b2b3b11b14*b14y21                        | 2232.11 | 92.125  | 14145  | 2 | 1116.56 | 4.05   |
| P05989 ILVC_SALTY Ketol-acid reductoisomerase | 5  | Carbamidomethyl+C(6)                                | VVIVGCGAQGLNQLGNMR                        | 39  | 18 | 4  | 16.16  | b1b3y7y11                                | 1885.99 | 72.691  | 6761   | 3 | 629.33  | 6.93   |
| P05989 ILVC_SALTY Ketol-acid reductoisomerase | 6  |                                                     | FMGRDEFADGASYLQGK                         | 21  | 17 | 3  | 25.58  | y3y4y15                                  | 1891.86 | 51.640  | 4911   | 3 | 631.29  | -2.77  |
| P05989 ILVC_SALTY Ketol-acid reductoisomerase | 7  | Carbamidomethyl+C(6)                                | VVIVGCGAQGLNQLGNMRDSSL<br>DISYALR         | 39  | 29 | 4  | 25.53  | b9b10y8y14                               | 3076.54 | 94.972  | 2979   | 3 | 1026.19 | -7.62  |
| P05989 ILVC_SALTY Ketol-acid reductoisomerase | 8  |                                                     | DGAALGYSHGFNIVEVGEQIRK                    | 123 | 22 | 4  | 25.01  | b4b5b13y8                                | 2360.17 | 73.015  | 1666   | 4 | 590.80  | -13.45 |
| P05989 ILVC_SALTY Ketol-acid reductoisomerase | 9  | Carbamidomethyl+C(11)<br>;Carbamidomethyl+C(21<br>) | SDLMGEQTILCGMLQAGSLLCFD<br>K              | 215 | 24 | 5  | 17.6   | b4b12y12y14*y14                          | 2687.28 | 93.129  | 26509  | 3 | 896.43  | 10.90  |
| P05989 ILVC_SALTY Ketol-acid reductoisomerase | 10 |                                                     | TAFETAPQYEGK                              | 336 | 12 | 3  | 23.03  | b6b10y10                                 | 1341.62 | 35.949  | 2391   | 3 | 447.88  | -5.55  |
| P05989 ILVC_SALTY Ketol-acid reductoisomerase | 11 |                                                     | QGGITLMMDR                                | 266 | 10 | 3  | 27.71  | b5b9y4                                   | 1121.54 | 35.020  | 2267   | 2 | 561.27  | -2.83  |
| P05989 ILVC_SALTY Ketol-acid reductoisomerase | 12 |                                                     | AGVLESSFVAEVK                             | 202 | 13 | 4  | 30.7   | b5b10y7y9                                | 1335.69 | 50.519  | 2193   | 2 | 668.35  | -18.55 |
| P05989 ILVC_SALTY Ketol-acid reductoisomerase | 13 |                                                     | AWAAATGGHR                                | 192 | 10 | 4  | 40.46  | b3b7y4y8                                 | 997.49  | 68.389  | 2173   | 1 | 997.49  | -3.12  |
| P05989 ILVC_SALTY Ketol-acid reductoisomerase | 14 |                                                     | DEFADGASYLQGK                             | 25  | 13 | 3  | 21.36  | b7b10y10                                 | 1400.66 | 28.658  | 1533   | 2 | 700.84  | 21.88  |
| P05989 ILVC_SALTY Ketol-acid reductoisomerase | 15 |                                                     | VGTYEELIPQADLVVNLTDPKQHS<br>DVVR          | 88  | 28 | 4  | 25.74  | b8b14y4y5                                | 3135.59 | 99.481  | 36252  | 3 | 1045.87 | -14.17 |
| P05989 ILVC_SALTY Ketol-acid reductoisomerase | 16 | Carbamidomethyl+C(9)                                | QQLAQLGKCR                                | 11  | 10 | 3  | 34.7   | y4y6y7                                   | 1201.63 | 39.584  | 14311  | 3 | 401.21  | -14.02 |
| P05989 ILVC_SALTY Ketol-acid reductoisomerase | 17 |                                                     | LIQFGWETITEALKQGGITLMMDR                  | 252 | 24 | 9  | 59.73  | b3b6b7y3y4y5*y5y10y21                    | 2751.42 | 119.452 | 7302   | 3 | 917.81  | 1.33   |
| P05989 ILVC_SALTY Ketol-acid reductoisomerase | 18 | Carbamidomethyl+C(11)<br>;Carbamidomethyl+C(21<br>) | SDLMGEQTILCGMLQAGSLLCFD<br>KLVAEGTDPAYAEK | 215 | 37 | 6  | 24.27  | b3y6*y6y8y9y12                           | 4031.96 | 118.582 | 6495   | 3 | 1344.66 | 12.41  |
| P05989 ILVC_SALTY Ketol-acid reductoisomerase | 19 |                                                     | EETGKTAFETAPQYEGK                         | 331 | 17 | 4  | 34.64  | y6y8y9y11                                | 1885.89 | 81.455  | 4166   | 3 | 629.30  | 4.92   |
| P05989 ILVC_SALTY Ketol-acid reductoisomerase | 20 | Carbamidomethyl+C(11)                               | DITVVMVAPKCPGTEVR                         | 145 | 17 | 4  | 16.93  | b3*b3b9y8                                | 1871.97 | 70.365  | 1661   | 3 | 624.66  | -0.46  |
| P05989 ILVC_SALTY Ketol-acid reductoisomerase | 21 | Phosphoryl STY()                                    | SVQPLMKDGAALGYSHGFNIVEV<br>GEQIR          | 116 | 28 | 3  | 18.03  | b8b13b15                                 | 3095.53 | 80.255  | 6782   | 3 | 1032.51 | 10.65  |
| P05989 ILVC_SALTY Ketol-acid reductoisomerase | 22 | Phosphoryl STY(6)                                   | GFGVPTLIAVHPENDPQEGEMAIA<br>K             | 167 | 25 | 9  | 54.61  | b4b5b10*b10b11*b11y10y<br>11*y11         | 2628.25 | 136.429 | 6035   | 3 | 876.75  | 2.42   |
| Q7CPL6 RL18_SALTY 50S ribosomal protein L18   | 1  |                                                     | VQALADAAR                                 | 102 | 9  | 12 | 76.69  | b2b3*b3y3y4*y4y5*y5y7y8<br>*y8y9         | 914.49  | 31.978  | 102114 | 2 | 457.75  | -13.28 |
| Q7CPL6 RL18_SALTY 50S ribosomal protein L18   | 2  |                                                     | GIKDVSFDR                                 | 85  | 9  | 3  | 39.1   | y3y4y6                                   | 1036.53 | 41.978  | 22857  | 2 | 518.77  | -8.83  |
| Q7CPL6 RL18_SALTY 50S ribosomal protein L18   | 3  |                                                     | HIYAQVIAPNGSEVLVAASTVEK                   | 33  | 23 | 5  | 29.31  | b4b12b13y7y14                            | 2396.26 | 63.965  | 163557 | 4 | 599.82  | -9.88  |
| Q56073 DNAK_SALTY Chaperone protein dnaK      | 1  |                                                     | IINEPTAAALAYGLDKEVGNR                     | 167 | 21 | 14 | 116.63 | b2b3y5*y5y6y7y9y10y11y1<br>2y14y17y19y21 | 2215.16 | 75.716  | 59677  | 3 | 739.06  | -6.28  |

|                                            |    |                       |                                        |     |    |    |       |                                        |         |         |        |   |         |        |
|--------------------------------------------|----|-----------------------|----------------------------------------|-----|----|----|-------|----------------------------------------|---------|---------|--------|---|---------|--------|
| IQ56073 DNAK_SALTY Chaperone protein dnaK  | 2  |                       | MQELAQVSQK                             | 587 | 10 | 7  | 49.03 | b2b3y3°y3y6y8y10                       | 1161.59 | 37.776  | 49446  | 2 | 581.30  | -1.05  |
| IQ56073 DNAK_SALTY Chaperone protein dnaK  | 3  |                       | QAVTNPQNTLFAIKR                        | 56  | 15 | 5  | 53.65 | y4y5y6y8y10                            | 1700.92 | 59.406  | 33782  | 3 | 567.65  | -12.56 |
| IQ56073 DNAK_SALTY Chaperone protein dnaK  | 4  |                       | ASSGLNEEEIQK                           | 502 | 12 | 6  | 45.98 | y5y7*y7y9y10y12                        | 1304.62 | 35.373  | 21886  | 2 | 652.82  | -6.08  |
| IQ56073 DNAK_SALTY Chaperone protein dnaK  | 5  |                       | SLGQFNLDGINPAPR                        | 452 | 15 | 7  | 30.42 | b10y4y8y10°y10*y10y15                  | 1598.84 | 72.714  | 20647  | 2 | 799.92  | 7.86   |
| IQ56073 DNAK_SALTY Chaperone protein dnaK  | 6  |                       | TAEDYLGEPVTEAVITVPAYFNDAQR             | 125 | 26 | 6  | 33.91 | b5b7b9y5y6y9                           | 2869.42 | 94.277  | 7569   | 2 | 1435.21 | 11.15  |
| IQ56073 DNAK_SALTY Chaperone protein dnaK  | 7  |                       | IELSSAQQTVDNLPYITADATGPK               | 270 | 24 | 3  | 13.12 | b9b11y5                                | 2532.29 | 72.452  | 6065   | 3 | 844.77  | 4.34   |
| IQ56073 DNAK_SALTY Chaperone protein dnaK  | 8  |                       | TFEVLATNGDTHLGGEDFDTR                  | 214 | 21 | 4  | 14.38 | b3b5y10y21                             | 2295.05 | 65.797  | 5705   | 4 | 574.52  | -1.60  |
| IQ56073 DNAK_SALTY Chaperone protein dnaK  | 9  |                       | VAEFFGKEPR                             | 352 | 10 | 6  | 34.7  | b1b5°b5b7b8°b8                         | 1179.60 | 44.787  | 2822   | 2 | 590.30  | -11.28 |
| IQ56073 DNAK_SALTY Chaperone protein dnaK  | 10 |                       | TIAVYDLGGGTFDISIIEIDVDGEK              | 188 | 26 | 6  | 32.44 | b6b11y3y4y7y11                         | 2769.33 | 119.898 | 32841  | 3 | 923.78  | -15.43 |
| IQ56073 DNAK_SALTY Chaperone protein dnaK  | 11 |                       | LMEIAQQQHAQQAGSADASANNAK               | 597 | 25 | 3  | 12.8  | b8y6y9                                 | 2610.22 | 93.489  | 16960  | 3 | 870.74  | -5.71  |
| IQ56073 DNAK_SALTY Chaperone protein dnaK  | 12 |                       | GMPQIEVTFDIDADGILHVS AK                | 467 | 22 | 5  | 30.16 | b5b7b8b13*b13                          | 2356.14 | 95.247  | 9847   | 4 | 589.79  | -19.89 |
| IQ56073 DNAK_SALTY Chaperone protein dnaK  | 13 |                       | FQDEEVQR                               | 76  | 8  | 3  | 36.96 | b3b7y6                                 | 1050.46 | 74.092  | 2058   | 2 | 525.73  | -22.08 |
| IQ56073 DNAK_SALTY Chaperone protein dnaK  | 14 |                       | HSQVFSTAEDNQSAVTIHVLQGER               | 421 | 24 | 3  | 23.41 | y3y4y7                                 | 2653.35 | 82.712  | 1576   | 2 | 1327.18 | 20.89  |
| IQ56073 DNAK_SALTY Chaperone protein dnaK  | 15 | Carbamidomethyl+C(15) | MGKIIGIDLGTNSCVAIMDGTQAR               | 0   | 25 | 5  | 12.8  | b21y6*y6y9*y9                          | 2622.30 | 85.358  | 277426 | 3 | 874.77  | -1.77  |
| IQ56073 DNAK_SALTY Chaperone protein dnaK  | 16 |                       | AKIELSSAQQTVDNLPYITADATGPK             | 268 | 26 | 4  | 18.65 | y6y8y13*y13                            | 2731.40 | 99.413  | 32026  | 3 | 911.14  | -3.84  |
| IQ56073 DNAK_SALTY Chaperone protein dnaK  | 17 |                       | SIEPLKVALQDAGLSVSDINDVILVGGQTR         | 315 | 30 | 4  | 22.53 | b3y4y5y7                               | 3107.70 | 107.344 | 22789  | 3 | 1036.57 | 2.12   |
| IQ56073 DNAK_SALTY Chaperone protein dnaK  | 18 |                       | LMEIAQQQHAQQAGSADASANNAKDDDVVD AEFEEVK | 597 | 38 | 6  | 16.62 | b5°b5b9b11y4y10                        | 4100.92 | 89.973  | 14295  | 5 | 820.99  | 10.48  |
| IQ56073 DNAK_SALTY Chaperone protein dnaK  | 19 |                       | LPADDKTAIESALNALETALK                  | 556 | 21 | 5  | 50.52 | b11b12b13b14y3                         | 2184.16 | 74.727  | 8809   | 3 | 728.72  | -7.60  |
| IQ56073 DNAK_SALTY Chaperone protein dnaK  | 20 |                       | ASDNKSLGQFNLDGINPAPR                   | 447 | 20 | 6  | 20.6  | b8b12*b12y11°y11y19                    | 2114.06 | 69.743  | 6477   | 3 | 705.36  | 0.46   |
| IQ56073 DNAK_SALTY Chaperone protein dnaK  | 21 |                       | DQGIDLRNDPLAMQR                        | 246 | 15 | 5  | 26.89 | b5b6°b6b9*b9                           | 1741.86 | 48.273  | 3017   | 2 | 871.43  | -1.61  |
| IQ56073 DNAK_SALTY Chaperone protein dnaK  | 22 |                       | IIGADNGDAWLDVKGQK                      | 92  | 17 | 4  | 25.58 | b7b8b10*b10                            | 1799.94 | 136.259 | 1896   | 2 | 900.47  | 5.09   |
| IQ56073 DNAK_SALTY Chaperone protein dnaK  | 23 | Phosphoryl STY(15)    | IELSSAQQTVDNLPYITADATGPK               | 270 | 24 | 12 | 42.71 | b9°b9*b9b11°b11*b11b12°b12b13°b13y9y14 | 2612.22 | 51.390  | 16488  | 3 | 871.41  | -8.04  |
| IP60446 RL3_SALTY 50S ribosomal protein L3 | 1  |                       | IFTEDGVSIPTVTVIEVEANR                  | 13  | 20 | 4  | 9.2   | b5y4°y4y20                             | 2188.17 | 88.856  | 33508  | 2 | 1094.59 | 8.03   |
| IP60446 RL3_SALTY 50S ribosomal protein L3 | 2  |                       | VTQVKDLANDGYR                          | 33  | 13 | 8  | 80.94 | b4y6y7y8y9°y9y10y12                    | 1478.74 | 40.319  | 13234  | 3 | 493.59  | -11.97 |
| IP60446 RL3_SALTY 50S ribosomal protein L3 | 3  |                       | NLLLVK                                 | 184 | 6  | 4  | 40.98 | b3*b3y3y4                              | 699.47  | 56.826  | 17091  | 1 | 699.47  | -7.85  |
| IP60446 RL3_SALTY 50S ribosomal protein L3 | 4  |                       | GLWEFR                                 | 77  | 6  | 1  | 13.91 | y4                                     | 807.42  | 39.249  | 14897  | 2 | 404.22  | 12.02  |
| IP60446 RL3_SALTY 50S ribosomal protein L3 | 5  |                       | VGMTR                                  | 8   | 5  | 1  | 13.53 | b4                                     | 563.30  | 50.550  | 10031  | 1 | 563.30  | 1.63   |
| IP60446 RL3_SALTY 50S ribosomal protein L3 | 6  |                       | WNFR                                   | 124 | 4  | 1  | 13.16 | y3                                     | 622.31  | 71.631  | 8109   | 1 | 622.31  | -6.28  |
| IP60446 RL3_SALTY 50S ribosomal protein L3 | 7  |                       | VDAER                                  | 179 | 5  | 2  | 27.07 | b3b4                                   | 589.30  | 62.497  | 5236   | 1 | 589.30  | 3.52   |

|                                                             |    |                       |                                  |     |    |    |        |                                                    |         |         |       |   |         |        |
|-------------------------------------------------------------|----|-----------------------|----------------------------------|-----|----|----|--------|----------------------------------------------------|---------|---------|-------|---|---------|--------|
| [P60446]RL3_SALTY 50S ribosomal protein L3                  | 8  |                       | VTVQSLDVVR                       | 169 | 10 | 4  | 44.26  | b7y3y4y5                                           | 1115.64 | 57.251  | 2420  | 1 | 1115.64 | -2.30  |
| [P60446]RL3_SALTY 50S ribosomal protein L3                  | 9  |                       | TQDATHGNSLSHR                    | 128 | 13 | 7  | 35.11  | b7°b7y7*y7y9y11°y11                                | 1423.67 | 112.989 | 1776  | 2 | 712.34  | 2.74   |
| [P60446]RL3_SALTY 50S ribosomal protein L3                  | 10 |                       | LAEGEEYTVGQSISVELFADV K          | 83  | 22 | 5  | 44.74  | b3b4b5b12b14                                       | 2384.21 | 136.458 | 1744  | 3 | 795.41  | 7.99   |
| [P60446]RL3_SALTY 50S ribosomal protein L3                  | 11 | Carbamidomethyl+C(9)  | GGVPGATGCDLIVKPAVKA              | 190 | 19 | 9  | 79.64  | b5b7b13y5y6y7y8y13y16                              | 1809.97 | 56.937  | 83417 | 3 | 603.99  | -10.66 |
| [P60446]RL3_SALTY 50S ribosomal protein L3                  | 12 |                       | IFTEDGV SIPVTVIEVEANRVTQVK       | 13  | 25 | 6  | 23.76  | b5b7°b7y16y18y20                                   | 2743.49 | 95.604  | 42675 | 3 | 915.17  | 1.51   |
| [P60446]RL3_SALTY 50S ribosomal protein L3                  | 13 |                       | ANRVTKPEAGHFAK                   | 56  | 14 | 3  | 19.98  | b4b12y9                                            | 1525.82 | 54.730  | 2608  | 3 | 509.28  | -3.76  |
| [P60446]RL3_SALTY 50S ribosomal protein L3                  | 14 |                       | WNFRTQDATHGNSLSHR                | 124 | 17 | 5  | 23.92  | b5y10°y10y11°y11                                   | 2026.98 | 105.388 | 2121  | 4 | 507.50  | 8.13   |
| [P0A1V4]KAD_SALTY Adenylate kinase                          | 1  |                       | YGIPQISTGDMLR                    | 23  | 13 | 12 | 59.89  | b2y1y3y5y6y7°y7y10°y10*y10y13*y13                  | 1450.74 | 73.354  | 40686 | 2 | 725.87  | 2.02   |
| [P0A1V4]KAD_SALTY Adenylate kinase                          | 2  |                       | LVEYHQMTAPLIGYYQK                | 167 | 17 | 13 | 27.07  | b1b2b7°b7b9°b9b11y1y2*y2y6*y11y17                  | 2054.04 | 69.808  | 37404 | 3 | 685.35  | -1.43  |
| [P0A1V4]KAD_SALTY Adenylate kinase                          | 3  |                       | NGFLLDGFPR                       | 78  | 10 | 4  | 44.26  | b7y4y5y6                                           | 1135.59 | 81.161  | 26550 | 2 | 568.30  | -2.26  |
| [P0A1V4]KAD_SALTY Adenylate kinase                          | 4  |                       | IILLGAPGAGK                      | 2   | 11 | 5  | 36.84  | b2y2y5y7y9                                         | 1009.63 | 61.824  | 18904 | 2 | 505.32  | -5.56  |
| [P0A1V4]KAD_SALTY Adenylate kinase                          | 5  |                       | TIPQADAMKEAGIVVDYVLEFDV PDELIVDR | 88  | 31 | 4  | 11.47  | b9b14y1y8                                          | 3460.78 | 123.155 | 9693  | 3 | 1154.26 | 6.49   |
| [P0A1V4]KAD_SALTY Adenylate kinase                          | 6  |                       | VDGTQAVADV R                     | 195 | 11 | 3  | 25.08  | b3y8y10                                            | 1130.58 | 37.276  | 64964 | 2 | 565.79  | -2.05  |
| [P0A1V4]KAD_SALTY Adenylate kinase                          | 7  |                       | FNPPK                            | 136 | 5  | 3  | 27.07  | b3y4*y4                                            | 602.32  | 56.516  | 49799 | 1 | 602.32  | -9.53  |
| [P0A1V4]KAD_SALTY Adenylate kinase                          | 8  |                       | EAGIVVDYVLEFDV PDELIVDR          | 97  | 22 | 3  | 13.91  | b14y10y12                                          | 2505.22 | 92.335  | 40214 | 3 | 835.75  | -21.54 |
| [P0A1V4]KAD_SALTY Adenylate kinase                          | 9  |                       | GTQAQFIMEK                       | 13  | 10 | 6  | 29.47  | b3*b3b4°b4°b4y9                                    | 1152.58 | 51.307  | 1511  | 2 | 576.79  | 3.71   |
| [P0A1V4]KAD_SALTY Adenylate kinase                          | 10 |                       | IILLGAPGAGKGTQAQFIMEK            | 2   | 21 | 5  | 39.33  | b3b4y3y4y17                                        | 2143.19 | 73.301  | 34726 | 3 | 715.07  | -3.42  |
| [P0A1V4]KAD_SALTY Adenylate kinase                          | 11 |                       | AAVKS GSELGK                     | 36  | 11 | 3  | 36.84  | y5y6y7                                             | 1046.58 | 49.627  | 25203 | 2 | 523.79  | -3.15  |
| [P0A1V4]KAD_SALTY Adenylate kinase                          | 12 |                       | VEGKDDVTGEDLTTR                  | 141 | 15 | 5  | 18.81  | b8b13°b13y11°y11                                   | 1634.79 | 79.881  | 16176 | 2 | 817.90  | 5.00   |
| [P0A1V4]KAD_SALTY Adenylate kinase                          | 13 |                       | DIMDAGKLVTD ELVIALVK             | 50  | 19 | 7  | 71.09  | b4b8y3y4y5y6y7                                     | 2043.12 | 116.625 | 13953 | 3 | 681.71  | -10.46 |
| [P0A1V4]KAD_SALTY Adenylate kinase                          | 14 |                       | GTQAQFIMEKYGIPQISTGDMLR          | 13  | 23 | 3  | 13.49  | b8b11y12                                           | 2584.26 | 77.491  | 12775 | 3 | 862.09  | -10.30 |
| [P0A1V4]KAD_SALTY Adenylate kinase                          | 15 |                       | LVEYHQMTAPLIGYYQKEAEAGN TK       | 167 | 25 | 7  | 28.43  | b8°b8y4*y4y6y12y17                                 | 2854.37 | 97.963  | 6873  | 3 | 952.13  | -11.97 |
| [P0A1V4]KAD_SALTY Adenylate kinase                          | 16 | Oxidation+M(7)        | LVEYHQMTAPLIGYYQKEAEAGN TK       | 167 | 25 | 5  | 23.8   | b17y8y12°y12y13                                    | 2870.37 | 91.581  | 3211  | 3 | 957.46  | -10.63 |
| [Q56109]NRDI_SALTY Protein nrdI                             | 1  |                       | IQVDEPYILV VPSYGGGGMAGAV PR      | 35  | 25 | 7  | 33.31  | b13b21y8y13y15y16y25                               | 2545.29 | 92.195  | 50790 | 3 | 849.10  | -6.91  |
| [Q56109]NRDI_SALTY Protein nrdI                             | 2  |                       | FELMG TQRDIDNVR                  | 108 | 14 | 7  | 28.58  | b6b10°b10y4°y4y10y14                               | 1693.84 | 68.410  | 14094 | 3 | 565.28  | 2.81   |
| [Q56109]NRDI_SALTY Protein nrdI                             | 3  |                       | SALVYFSSSSENTHR                  | 1   | 15 | 5  | 52.86  | b8b9y4y5y6                                         | 1684.80 | 60.120  | 4629  | 3 | 562.27  | 6.23   |
| [Q56109]NRDI_SALTY Protein nrdI                             | 4  |                       | FELMG TQRDIDNVR                  | 108 | 14 | 3  | 19.98  | b7y6y11                                            | 1693.84 | 75.591  | 2125  | 2 | 847.42  | 1.73   |
| [Q56109]NRDI_SALTY Protein nrdI                             | 5  | Carbamidomethyl+C(16) | GVIASGNRNF GDAWGACGDVIAQ K       | 76  | 24 | 3  | 13.12  | b11y12y14                                          | 2463.15 | 92.714  | 1849  | 4 | 616.54  | -12.29 |
| [P14845]CARA_SALTY Carbamoyl-phosphate synthase small chain | 1  | Carbamidomethyl+C(12) | FLETDIPLFGICLGHQLLALASGAK        | 257 | 25 | 20 | 148.73 | b2b3°b3b4b5b6b25y1y3y4y5y6y7y14°y14y19y20y21y23y25 | 2684.45 | 128.243 | 37977 | 3 | 895.49  | -0.64  |



|                                                          |    |                                             |                                      |     |    |    |       |                                        |         |         |       |   |         |        |
|----------------------------------------------------------|----|---------------------------------------------|--------------------------------------|-----|----|----|-------|----------------------------------------|---------|---------|-------|---|---------|--------|
| P14845 CARA_SALTY Carbamoyl-phohate synthase small chain | 2  |                                             | AFPGLNGMDLAKEVTTAETYSR               | 148 | 21 | 4  | 14.38 | b10b12y11°y11                          | 2284.15 | 82.400  | 9396  | 3 | 762.05  | 8.23   |
| P14845 CARA_SALTY Carbamoyl-phohate synthase small chain | 3  |                                             | SALLVLEDGTQFHGR                      | 3   | 15 | 6  | 37.69 | b1b3b8b9b11*b11                        | 1642.85 | 62.010  | 3907  | 3 | 548.29  | -0.67  |
| P14845 CARA_SALTY Carbamoyl-phohate synthase small chain | 4  |                                             | TDKPAFSFQGHPEASPGPHDAAPLFDHFIELIEQYR | 342 | 36 | 4  | 24.66 | b3b5y3y4                               | 4064.91 | 106.850 | 15760 | 5 | 813.79  | -11.89 |
| P14845 CARA_SALTY Carbamoyl-phohate synthase small chain | 5  |                                             | NVVMITAQNHGFAVDEDSL PANLR            | 302 | 24 | 5  | 29.79 | b6b10b11b15y3                          | 2611.25 | 101.605 | 2263  | 4 | 653.57  | -16.36 |
| P14845 CARA_SALTY Carbamoyl-phohate synthase small chain | 6  |                                             | SEDDLPPHFVVAYDFGAK                   | 185 | 17 | 3  | 24.33 | y9y11y13                               | 1909.90 | 82.241  | 1682  | 3 | 637.30  | 1.53   |
| P14845 CARA_SALTY Carbamoyl-phohate synthase small chain | 7  |                                             | SLFDGTLQGIHR                         | 330 | 12 | 4  | 27.01 | b7°b7b8y5                              | 1343.71 | 59.208  | 1511  | 3 | 448.58  | 6.09   |
| P14845 CARA_SALTY Carbamoyl-phohate synthase small chain | 8  | Carbamidomethyl+C(8)                        | EKGAQNGCIIAGDSPDAK                   | 123 | 18 | 4  | 25.72 | b13y3y10y16                            | 1830.85 | 64.671  | 2077  | 4 | 458.47  | -6.20  |
| P14845 CARA_SALTY Carbamoyl-phohate synthase small chain | 9  | Oxidation+M(8)                              | AFPGLNGMDLAKEVTTAETYSR               | 148 | 21 | 4  | 25.52 | b11y5y6y15                             | 2300.14 | 88.669  | 23790 | 3 | 767.39  | 7.64   |
| P14845 CARA_SALTY Carbamoyl-phohate synthase small chain | 10 | Oxidation+M(8)                              | AFPGLNGMDLAK                         | 148 | 12 | 3  | 23.03 | b4b7y8                                 | 1249.63 | 35.466  | 15118 | 3 | 417.22  | 7.52   |
| P14845 CARA_SALTY Carbamoyl-phohate synthase small chain | 11 | Oxidation+M(13)                             | FGHHGGNHPVKMDMR                      | 287 | 15 | 4  | 26.78 | b5b12y3y5                              | 1719.75 | 58.933  | 2263  | 2 | 860.38  | -14.83 |
| P66738 RRF_SALTY Ribosome-recycling factor               | 1  |                                             | ASPSLLDGIVVEYYGTPTPLR                | 31  | 21 | 12 | 71.25 | b8°b8y2y5y7y10y11°y11y12y15y19y21      | 2248.22 | 93.975  | 46386 | 2 | 1124.61 | 14.55  |
| P66738 RRF_SALTY Ribosome-recycling factor               | 2  |                                             | SMGPAVEK                             | 72  | 8  | 6  | 52.26 | b2b6b7y3y6y8                           | 818.41  | 27.363  | 9759  | 2 | 409.71  | 0.82   |
| P66738 RRF_SALTY Ribosome-recycling factor               | 3  |                                             | AIMASDLGLNPSSAGTDIR                  | 80  | 19 | 5  | 15.49 | b5b11°b11y13°y13                       | 1888.98 | 86.272  | 28023 | 2 | 945.00  | 21.26  |
| P66738 RRF_SALTY Ribosome-recycling factor               | 4  |                                             | MISDIR                               | 0   | 6  | 1  | 13.91 | y5                                     | 734.40  | 42.975  | 10303 | 2 | 367.70  | 12.22  |
| P66738 RRF_SALTY Ribosome-recycling factor               | 5  |                                             | AIMASDLGLNPSSAGTDIRVPLPPLTEER        | 80  | 29 | 7  | 54.82 | b5b6y6y7y12y20y21                      | 3020.59 | 87.054  | 60505 | 3 | 1007.53 | 4.36   |
| P66738 RRF_SALTY Ribosome-recycling factor               | 6  |                                             | IVRGAEQAR                            | 115 | 10 | 5  | 57    | b5b6b7y3y5                             | 1128.60 | 16.452  | 9791  | 2 | 564.80  | -11.36 |
| P66738 RRF_SALTY Ribosome-recycling factor               | 7  | Carbamidomethyl+C(1)                        | CVEAFKTIQISK                         | 15  | 11 | 3  | 32.07 | b3b7b8                                 | 1310.69 | 49.638  | 4392  | 3 | 437.57  | 12.20  |
| P66738 RRF_SALTY Ribosome-recycling factor               | 8  |                                             | INVFDRSMGPAVEK                       | 66  | 14 | 5  | 25.42 | b11*b11b12y8°y8                        | 1562.81 | 58.977  | 3067  | 3 | 521.61  | 4.22   |
| P66738 RRF_SALTY Ribosome-recycling factor               | 9  | Oxidation+M(13)                             | VDAALADKEAELMQF                      | 170 | 15 | 3  | 24.83 | b12y13y14                              | 1666.79 | 136.634 | 2249  | 1 | 1666.79 | -7.91  |
| Q8ZK57 IOLG_SALTY Inositol 2-dehydrogenase               | 1  |                                             | NIIDSGEIGQPLMVHGR                    | 137 | 17 | 8  | 37.38 | b12°b12y7y9y11*y11y12°y12              | 1835.97 | 71.169  | 8187  | 2 | 918.49  | 14.69  |
| Q8ZK57 IOLG_SALTY Inositol 2-dehydrogenase               | 2  |                                             | TPQAIYETLIHEIDVMHWLLNEDYK            | 165 | 25 | 4  | 12.8  | b8*b8b19y8                             | 3071.52 | 106.653 | 2967  | 4 | 768.64  | 0.95   |
| Q8ZK57 IOLG_SALTY Inositol 2-dehydrogenase               | 3  | Carbamidomethyl+C(25)                       | LNAGLPPAGPTSWDGYLAAVTADACVK          | 289 | 27 | 5  | 27.9  | b13y7y9y10y13                          | 2715.31 | 108.013 | 2622  | 3 | 905.78  | -12.41 |
| Q8ZK57 IOLG_SALTY Inositol 2-dehydrogenase               | 4  | Carbamidomethyl+C(4); Carbamidomethyl+C(15) | YVFCEKPLAVTAADCQR                    | 91  | 17 | 3  | 25.58 | b6b7b9                                 | 2027.94 | 53.602  | 2215  | 3 | 676.65  | -11.26 |
| Q8ZK57 IOLG_SALTY Inositol 2-dehydrogenase               | 5  |                                             | FIDAYDIEFQDFDR                       | 274 | 15 | 5  | 30.42 | b4b7b8°b8y5                            | 1940.91 | 67.141  | 18839 | 2 | 970.96  | 21.95  |
| Q8ZK57 IOLG_SALTY Inositol 2-dehydrogenase               | 6  |                                             | HYNASTVPEYK                          | 154 | 11 | 6  | 37.82 | b6b7*b7b10y7°y7                        | 1308.60 | 102.775 | 2941  | 3 | 436.87  | -16.04 |
| Q8ZK57 IOLG_SALTY Inositol 2-dehydrogenase               | 7  | Carbamidomethyl+C(14)                       | LANTVSGVEVVAVCDIVAGR                 | 20  | 20 | 4  | 14.9  | b4b14°b14y7                            | 2029.07 | 73.125  | 2193  | 3 | 677.03  | -0.42  |
| Q8ZK57 IOLG_SALTY Inositol 2-dehydrogenase               | 8  |                                             | AAKYSTDILVDWK                        | 259 | 13 | 4  | 30.6  | b3b8°b8b11                             | 1509.77 | 114.144 | 3151  | 2 | 755.39  | -14.39 |
| Q8ZK57 IOLG_SALTY Inositol 2-dehydrogenase               | 9  | Carbamidomethyl+C(14);Phosphoryl STY(6)     | LANTVSGVEVVAVCDIVAGR                 | 20  | 20 | 7  | 49.07 | b8b14y7y8y14°y14y15_H3PO4 y15_HPO3 y15 | 2109.00 | 97.428  | 3802  | 3 | 703.67  | -12.97 |

|                                                    |    |                   |                                    |     |    |    |       |                               |         |         |       |   |         |        |
|----------------------------------------------------|----|-------------------|------------------------------------|-----|----|----|-------|-------------------------------|---------|---------|-------|---|---------|--------|
| Q8ZK57 IOLG_SALTY Inositol 2-dehydrogenase         | 10 | Oxidation+M(8)    | AGIVGIGMIGSDHLR                    | 4   | 15 | 6  | 38.39 | b5b14y5y6°y6y8                | 1511.82 | 99.519  | 10433 | 3 | 504.61  | 10.09  |
| Q8ZK57 IOLG_SALTY Inositol 2-dehydrogenase         | 11 | Oxidation+M(13)   | NIIDSGEIGQPLMVHGR                  | 137 | 17 | 3  | 16.93 | b11y7y12                      | 1851.91 | 71.325  | 8277  | 3 | 617.98  | -14.30 |
| Q8ZQM3 GSIB_SALTY Glutathione-binding protein gsiB | 1  |                   | ELLKEAGYPDGFSTTLWSSHNHSTAQK        | 335 | 27 | 7  | 49.74 | b8°b8y7y8°y8y9y10             | 3004.42 | 66.525  | 36944 | 4 | 751.86  | -8.61  |
| Q8ZQM3 GSIB_SALTY Glutathione-binding protein gsiB | 2  |                   | NLTGFWIMPDTGFSDDADLK               | 491 | 21 | 8  | 27.87 | b4°b4b8y2y9y11y13y21          | 2390.13 | 107.384 | 32636 | 2 | 1195.57 | 10.93  |
| Q8ZQM3 GSIB_SALTY Glutathione-binding protein gsiB | 3  |                   | DIGFHPVGTGPYQLETWNQTDVFK           | 176 | 24 | 10 | 45.3  | b9°b9b10b14b20y6y10y11°y11y24 | 2749.34 | 83.827  | 25578 | 3 | 917.12  | 5.86   |
| Q8ZQM3 GSIB_SALTY Glutathione-binding protein gsiB | 4  |                   | FQDGADFNAAAVK                      | 97  | 13 | 6  | 44.14 | b2y5y9y10y11y13               | 1353.65 | 50.367  | 24335 | 2 | 677.33  | 2.16   |
| Q8ZQM3 GSIB_SALTY Glutathione-binding protein gsiB | 5  |                   | EALNYAINR                          | 286 | 9  | 4  | 39.1  | y5y6y7y9                      | 1063.55 | 45.736  | 21805 | 2 | 532.28  | -6.77  |
| Q8ZQM3 GSIB_SALTY Glutathione-binding protein gsiB | 6  |                   | AAMLQTGEAQFAFPIPYEAALLAK           | 229 | 25 | 4  | 12.8  | b5b11y10y25                   | 2679.40 | 97.789  | 20828 | 3 | 893.80  | 5.38   |
| Q8ZQM3 GSIB_SALTY Glutathione-binding protein gsiB | 7  |                   | ITAMDAGQR                          | 379 | 9  | 4  | 58.65 | y4y5y7y8                      | 962.47  | 29.779  | 16831 | 2 | 481.74  | -6.34  |
| Q8ZQM3 GSIB_SALTY Glutathione-binding protein gsiB | 8  |                   | YGKDIGFHPVGTGPYQLETWNQTDVFK        | 173 | 27 | 10 | 41.34 | b4b8b11b19y1y2y7y8*y8y11      | 3097.48 | 76.918  | 14950 | 4 | 775.13  | -6.62  |
| Q8ZQM3 GSIB_SALTY Glutathione-binding protein gsiB | 9  |                   | NLELVASPSIMQR                      | 256 | 13 | 6  | 54.66 | b3y5y6y7y8y13                 | 1457.78 | 69.319  | 11322 | 2 | 729.40  | 3.18   |
| Q8ZQM3 GSIB_SALTY Glutathione-binding protein gsiB | 10 |                   | LDSITWRPVTDNNTR                    | 214 | 15 | 4  | 42.46 | y4y7y11y13                    | 1787.93 | 57.508  | 5602  | 2 | 894.47  | 13.04  |
| Q8ZQM3 GSIB_SALTY Glutathione-binding protein gsiB | 11 |                   | SFYQGLFLGLDKDMK                    | 56  | 14 | 6  | 19.98 | b8b11°b11*b11y8°y8            | 1648.80 | 69.859  | 5469  | 2 | 824.91  | 0.00   |
| Q8ZQM3 GSIB_SALTY Glutathione-binding protein gsiB | 12 |                   | FAGYWQQGLPK                        | 203 | 11 | 5  | 32.07 | b3b9b10*b10b11                | 1294.68 | 53.054  | 3983  | 2 | 647.84  | 14.52  |
| Q8ZQM3 GSIB_SALTY Glutathione-binding protein gsiB | 13 |                   | ASNPDNHLKR                         | 115 | 10 | 6  | 37.71 | y1y2y5y6y7y10                 | 1151.58 | 15.006  | 3749  | 2 | 576.30  | -6.25  |
| Q8ZQM3 GSIB_SALTY Glutathione-binding protein gsiB | 14 |                   | TEVVDPATVK                         | 134 | 10 | 3  | 42.49 | y3y5y8                        | 1058.57 | 39.698  | 25876 | 2 | 529.79  | -5.65  |
| Q8ZQM3 GSIB_SALTY Glutathione-binding protein gsiB | 15 |                   | VLQFTQQQLAQIGVK                    | 362 | 15 | 6  | 26.78 | b5°b5b7*b7y4y12               | 1700.98 | 72.909  | 16650 | 2 | 850.99  | 4.88   |
| Q8ZQM3 GSIB_SALTY Glutathione-binding protein gsiB | 16 |                   | QVDSDLAAALK                        | 442 | 11 | 4  | 32.07 | b3b4b8°b8                     | 1130.60 | 51.296  | 8499  | 2 | 565.80  | -4.53  |
| Q8ZQM3 GSIB_SALTY Glutathione-binding protein gsiB | 17 |                   | YISMNVTQKPFDNPK                    | 269 | 15 | 6  | 30.42 | b4°b4b8°b8b11y6               | 1781.93 | 69.180  | 4691  | 2 | 891.47  | 21.92  |
| Q8ZQM3 GSIB_SALTY Glutathione-binding protein gsiB | 18 |                   | NVLAEGYTVSDDGLTYTITLR              | 72  | 21 | 4  | 14.38 | b7°b7b10y11                   | 2301.12 | 80.236  | 4084  | 4 | 576.03  | -18.99 |
| Q8ZQM3 GSIB_SALTY Glutathione-binding protein gsiB | 19 |                   | EAGYPDGFSTTLWSSHNHSTAQK            | 339 | 23 | 4  | 20.88 | b12y3y6y10                    | 2521.18 | 70.318  | 1761  | 3 | 841.07  | 16.85  |
| Q8ZQM3 GSIB_SALTY Glutathione-binding protein gsiB | 20 |                   | TQFITHK                            | 1   | 7  | 5  | 51.88 | b3*b3b4b5y5                   | 874.47  | 39.669  | 1720  | 2 | 437.74  | -10.82 |
| Q8ZQM3 GSIB_SALTY Glutathione-binding protein gsiB | 21 |                   | FAGYWQQGLPKLDSITWRPVTDNNTR         | 203 | 26 | 4  | 22.28 | b9y5°y5y6                     | 3063.53 | 83.549  | 73799 | 5 | 613.51  | -3.51  |
| Q8ZQM3 GSIB_SALTY Glutathione-binding protein gsiB | 22 |                   | ITLKQPFSAFINILAHPATAMISPQALEK      | 144 | 29 | 5  | 27.17 | y4y6y7*y7y11                  | 3150.70 | 110.345 | 38375 | 4 | 788.43  | -10.69 |
| Q8ZQM3 GSIB_SALTY Glutathione-binding protein gsiB | 23 |                   | SFYQGLFLGLDKDMK                    | 56  | 14 | 4  | 45.76 | y7y8y10y11                    | 1648.78 | 80.377  | 37481 | 3 | 550.27  | -13.77 |
| Q8ZQM3 GSIB_SALTY Glutathione-binding protein gsiB | 24 |                   | NKNLELVASPSIMQR                    | 254 | 15 | 5  | 38.82 | b3°b3b4y6y7                   | 1699.92 | 60.235  | 6114  | 2 | 850.47  | 5.03   |
| Q8ZQM3 GSIB_SALTY Glutathione-binding protein gsiB | 25 |                   | VAFAGYATPATGVVPPSIAYAQSYPWPYDPAKAR | 300 | 35 | 4  | 22.99 | b4b6b11b15                    | 3710.88 | 86.626  | 3296  | 3 | 1237.63 | 5.53   |
| Q8ZQM3 GSIB_SALTY Glutathione-binding protein gsiB | 26 |                   | QGVKFDQGADFNAAAVK                  | 93  | 17 | 5  | 27.07 | b5b8b13*b13y11                | 1765.91 | 76.831  | 2506  | 3 | 589.31  | 12.79  |
| Q8ZQM3 GSIB_SALTY Glutathione-binding protein gsiB | 27 | Phosphoryl STY(7) | NVLAEGYTVSDDGLTYTITLR              | 72  | 21 | 6  | 22.83 | b5°b5°b5b6°b6y3               | 2381.11 | 91.695  | 3612  | 4 | 596.03  | -2.87  |

|                                                         |    |                       |                                                    |     |    |    |        |                                       |         |         |        |   |         |        |
|---------------------------------------------------------|----|-----------------------|----------------------------------------------------|-----|----|----|--------|---------------------------------------|---------|---------|--------|---|---------|--------|
| Q8ZQM3 GSIB_SALTY Glutathione-binding protein gsiB      | 28 | Phosphoryl STY(8)     | TEVVDPATVK                                         | 134 | 10 | 3  | 27.71  | b3b7y4                                | 1138.53 | 33.454  | 1553   | 2 | 569.77  | -2.79  |
| Q8ZQM3 GSIB_SALTY Glutathione-binding protein gsiB      | 29 | Oxidation+M(8)        | NLTGFWIMPTDGFSDADLK                                | 491 | 21 | 8  | 32.32  | b4b8°b8°b8b10b11°b11y6                | 2406.11 | 136.433 | 4048   | 3 | 802.71  | 6.09   |
| Q8ZQM3 GSIB_SALTY Glutathione-binding protein gsiB      | 30 |                       | PDNHLKR                                            | 118 | 7  | 0  | 1.88   |                                       | 879.47  | 15.002  | 2061   | 2 | 440.24  | -7.91  |
| Q8ZQM3 GSIB_SALTY Glutathione-binding protein gsiB      | 31 |                       | NPDNHLKR                                           | 117 | 8  | 0  | 1.88   |                                       | 993.51  | 15.008  | 1869   | 2 | 497.26  | -11.55 |
| P66764 METK_SALTY S-adenosylmethionine synthetase       | 1  |                       | SLQEAVMEEIHKPILSEWLNSTK                            | 197 | 25 | 14 | 48.07  | b2b5b9b11°b11b12b23y1y2y5°y5y10y13y25 | 2856.51 | 111.636 | 34044  | 3 | 952.84  | 2.31   |
| P66764 METK_SALTY S-adenosylmethionine synthetase       | 2  | Carbamidomethyl+C(10) | FVIGGPMGDCGLTGRK                                   | 230 | 16 | 6  | 47.53  | b8b14b15y6y8y11                       | 1664.82 | 62.571  | 12599  | 3 | 555.61  | -5.50  |
| P66764 METK_SALTY S-adenosylmethionine synthetase       | 3  |                       | ADPLEQGAGDQGLMFGYATNETDVLMPAPITYAHR                | 109 | 35 | 3  | 11.05  | b5b11y5                               | 3749.77 | 84.951  | 11282  | 4 | 938.20  | 4.69   |
| P66764 METK_SALTY S-adenosylmethionine synthetase       | 4  | Carbamidomethyl+C(1)  | CEIQVSYAIGVAEPTSIMVETFGTEK                         | 294 | 26 | 5  | 12.5   | b4°b4b12y13y26                        | 2859.38 | 94.439  | 7499   | 3 | 953.80  | 1.79   |
| P66764 METK_SALTY S-adenosylmethionine synthetase       | 5  |                       | EFFDLRPYGLIQLDLLHPYKETAAAYGHFGR                    | 331 | 32 | 6  | 25.04  | b9b10°b10y7y9°y9                      | 3810.91 | 113.817 | 3478   | 4 | 953.48  | -8.65  |
| P66764 METK_SALTY S-adenosylmethionine synthetase       | 6  |                       | QSPDINQGVDR                                        | 98  | 11 | 4  | 25.08  | b3y5°y5y10                            | 1228.58 | 43.756  | 7970   | 2 | 614.79  | -13.41 |
| P66764 METK_SALTY S-adenosylmethionine synthetase       | 7  |                       | TGMVLVGGEITTSAWVDIEEITR                            | 47  | 23 | 3  | 19.9   | b4b11b13                              | 2477.28 | 111.703 | 2461   | 3 | 826.43  | 8.08   |
| P66764 METK_SALTY S-adenosylmethionine synthetase       | 8  | Carbamidomethyl+C(16) | EIGYVHSDMGFDANSCAVLSAIGK                           | 74  | 24 | 3  | 22.42  | b6b7y13                               | 2541.16 | 62.623  | 1779   | 3 | 847.72  | -6.24  |
| P66764 METK_SALTY S-adenosylmethionine synthetase       | 9  |                       | ETAAYGHFGR                                         | 353 | 10 | 4  | 27.71  | b4°b4b9y6                             | 1108.53 | 109.788 | 1647   | 1 | 1108.53 | 11.34  |
| P66764 METK_SALTY S-adenosylmethionine synthetase       | 10 |                       | MAKHLFTSESVSEGHDPK                                 | 0   | 18 | 3  | 16.16  | b7b14y6                               | 1999.95 | 102.418 | 51551  | 3 | 667.32  | -0.31  |
| P66764 METK_SALTY S-adenosylmethionine synthetase       | 11 |                       | HLFTSESVSEGHDPDKIADQISDAVLDAILQQDPK                | 3   | 34 | 3  | 11.13  | b17y7y21                              | 3703.86 | 78.273  | 29657  | 4 | 926.72  | 3.95   |
| P66764 METK_SALTY S-adenosylmethionine synthetase       | 12 |                       | SAAYAARYVAK                                        | 273 | 11 | 5  | 49.14  | b7b8b10y3y8                           | 1170.64 | 44.204  | 20383  | 2 | 585.82  | 11.68  |
| P66764 METK_SALTY S-adenosylmethionine synthetase       | 13 |                       | IIVDTYGGMARHGGGAFSGK                               | 246 | 20 | 6  | 20.6   | b8°b8b15°b15y7y11                     | 1993.96 | 74.655  | 17291  | 3 | 665.33  | -14.08 |
| P66764 METK_SALTY S-adenosylmethionine synthetase       | 14 |                       | QSPDINQGVDRADPLEQGAGDQG<br>LMFGYATNETDVLMPAPITYAHR | 98  | 46 | 5  | 11.74  | b4b9°b9y5y9                           | 4959.38 | 88.896  | 16616  | 4 | 1240.60 | 10.14  |
| P66764 METK_SALTY S-adenosylmethionine synthetase       | 15 |                       | ENFPWEKTDK                                         | 363 | 10 | 3  | 29.47  | b9y5y6                                | 1293.62 | 77.777  | 5844   | 2 | 647.31  | 4.15   |
| P66764 METK_SALTY S-adenosylmethionine synthetase       | 16 |                       | SQVTFQYDDGKIVGIDAVVLSTQHAEDIDQK                    | 166 | 31 | 3  | 11.47  | b12y5y7                               | 3419.65 | 114.806 | 2977   | 4 | 855.67  | -14.71 |
| P66764 METK_SALTY S-adenosylmethionine synthetase       | 17 |                       | AKHLFTSESVSEGHDPK                                  | 1   | 17 | 4  | 23.85  | b9b12y7y13                            | 1868.90 | 96.470  | 2258   | 2 | 934.95  | -8.56  |
| P66764 METK_SALTY S-adenosylmethionine synthetase       | 18 |                       | ETAAYGHFGRENFPWEK                                  | 353 | 17 | 4  | 24.33  | y4y6y8°y8                             | 2038.96 | 124.481 | 2248   | 3 | 680.32  | 7.06   |
| P66764 METK_SALTY S-adenosylmethionine synthetase       | 19 |                       | SLQEAVMEEIHKPILPSE                                 | 197 | 18 | 0  | 7.53   |                                       | 2026.05 | 111.657 | 4847   | 3 | 676.02  | -13.98 |
| P20753 PPIA_SALTY Peptidyl-prolyl cis-trans isomerase A | 1  |                       | NFVDYVNSGFYNNTTFHR                                 | 54  | 18 | 14 | 111.31 | b2b3y1y3y4y5y6*y7y8y10y11y12y16y18    | 2194.99 | 75.216  | 56313  | 3 | 732.33  | -2.67  |
| P20753 PPIA_SALTY Peptidyl-prolyl cis-trans isomerase A | 2  |                       | VIPGFMIQGGGFNEQMQQK                                | 72  | 19 | 5  | 24.52  | b6y5y11y13y19                         | 2109.05 | 77.318  | 31947  | 2 | 1055.03 | 10.42  |
| P20753 PPIA_SALTY Peptidyl-prolyl cis-trans isomerase A | 3  |                       | TADKDSATSQFFINVADNAFLDH<br>GQR                     | 116 | 26 | 7  | 36.11  | b11y4y7y10y11y13y26                   | 2868.33 | 86.473  | 31927  | 4 | 717.84  | -8.85  |
| P20753 PPIA_SALTY Peptidyl-prolyl cis-trans isomerase A | 4  |                       | TADKDSATSQFFINVADNAFLDH<br>GQRDFGYAVFGK            | 116 | 35 | 9  | 23.98  | b2b3b5°b5b7b12y2y3y13                 | 3852.80 | 95.906  | 23623  | 5 | 771.36  | -7.73  |
| P20753 PPIA_SALTY Peptidyl-prolyl cis-trans isomerase A | 5  |                       | GMDVADKISQVPTHTDVGPYQNV<br>PTKPVVILSAK             | 154 | 33 | 9  | 58.29  | b3b4b5b22y3y4y6y11y31                 | 3503.84 | 69.082  | 100086 | 4 | 876.72  | -3.83  |
| P20753 PPIA_SALTY Peptidyl-prolyl cis-trans isomerase A | 6  |                       | TADKDSATSQFFINVADNAFLDH<br>GQR                     | 116 | 26 | 5  | 22.93  | b9b13y7y9y13                          | 2868.34 | 107.972 | 1513   | 3 | 956.79  | -3.57  |

|                                                                  |    |                       |                                          |     |    |    |       |                              |         |         |        |   |         |        |
|------------------------------------------------------------------|----|-----------------------|------------------------------------------|-----|----|----|-------|------------------------------|---------|---------|--------|---|---------|--------|
| [P20753]PIIA_SALTY Peptidyl-prolyl cis-trans isomerase A         | 7  |                       | TADKDSATSQFFINVADNAFLDH GQR              | 116 | 26 | 0  | 7.91  |                              | 2851.32 | 86.477  | 3094   | 4 | 713.58  | -2.31  |
| [P67617]FETP_SALTY Probable Fe(2+)-trafficking protein           | 1  |                       | LLEQEMVSLFEGKDVHIEGYTPE DK               | 64  | 26 | 5  | 12.5  | b7*b7y3y13y26                | 3053.49 | 79.843  | 39478  | 4 | 764.13  | 4.16   |
| [P67617]FETP_SALTY Probable Fe(2+)-trafficking protein           | 2  | Carbamidomethyl+C(4)  | TIFCTYLQR                                | 3   | 9  | 8  | 54.39 | b7y1y3y5°y5y7y9*y9           | 1201.60 | 64.758  | 15090  | 2 | 601.30  | -0.71  |
| [P67617]FETP_SALTY Probable Fe(2+)-trafficking protein           | 3  |                       | LLEQEMVSLFEGK                            | 64  | 14 | 6  | 32.54 | b5°b5y3y7y12*y12             | 1669.87 | 75.319  | 2877   | 3 | 557.29  | 10.82  |
| [P67617]FETP_SALTY Probable Fe(2+)-trafficking protein           | 4  | Carbamidomethyl+C(6)  | SRTIFCTYLQR                              | 1   | 11 | 5  | 28.09 | b4°b4y6y7*y7                 | 1444.72 | 81.856  | 2565   | 3 | 482.24  | -11.58 |
| [P67617]FETP_SALTY Probable Fe(2+)-trafficking protein           | 5  | Oxidation+M(6)        | LLEQEMVSLFEGKDVHIEGYTPE DK               | 64  | 26 | 4  | 12.5  | b9b25y13°y13                 | 3069.51 | 136.568 | 2698   | 2 | 1535.26 | 10.66  |
| [P0A2B3]RS7_SALTY 30S ribosomal protein S7                       | 1  |                       | FGSELLAK                                 | 17  | 8  | 5  | 41.73 | b2y3y4y7y8                   | 864.47  | 51.989  | 45417  | 2 | 432.74  | -12.92 |
| [P0A2B3]RS7_SALTY 30S ribosomal protein S7                       | 2  |                       | STAESIVYSALETLAQR                        | 36  | 17 | 12 | 72.82 | b2°b2b8b13y2y3y4y5y6*y6y7y17 | 1838.96 | 106.847 | 43349  | 2 | 919.98  | 4.45   |
| [P0A2B3]RS7_SALTY 30S ribosomal protein S7                       | 3  |                       | FVNILMVDGK                               | 25  | 10 | 6  | 41.25 | b2b3y3y4y8y10                | 1135.61 | 76.283  | 18162  | 2 | 568.31  | -9.03  |
| [P0A2B3]RS7_SALTY 30S ribosomal protein S7                       | 4  |                       | MAEANK                                   | 143 | 6  | 2  | 27.44 | b3y5                         | 663.31  | 52.883  | 16821  | 1 | 663.31  | -5.06  |
| [P0A2B3]RS7_SALTY 30S ribosomal protein S7                       | 5  |                       | NALAMR                                   | 96  | 6  | 1  | 13.91 | y5                           | 675.36  | 36.466  | 5781   | 1 | 675.36  | -3.98  |
| [P0A2B3]RS7_SALTY 30S ribosomal protein S7                       | 6  |                       | LANELSDAADNK                             | 119 | 12 | 5  | 23.03 | b3*b3b7y4°y4                 | 1260.63 | 45.290  | 2670   | 2 | 630.82  | 20.63  |
| [P0A2B3]RS7_SALTY 30S ribosomal protein S7                       | 7  |                       | ILPDPK                                   | 11  | 6  | 1  | 13.91 | y4                           | 682.41  | 32.695  | 2334   | 1 | 682.41  | -5.28  |
| [P0A2B3]RS7_SALTY 30S ribosomal protein S7                       | 8  |                       | RVGGSTYQVPVEVRPVR                        | 78  | 17 | 9  | 93.93 | b4b5b6°b6b7b8b9y8y9          | 1899.04 | 49.702  | 39796  | 3 | 633.69  | -7.71  |
| [P16657]FABI_SALTY Enoyl-[acyl-carrier-protein] reductase [NADH] | 1  |                       | LSIAYGIAQAMHREGAELAFITYQN DK             | 17  | 26 | 8  | 28.47 | b1b11°b11y3y4y7y24y26        | 2897.44 | 107.149 | 106358 | 4 | 725.12  | 4.47   |
| [P16657]FABI_SALTY Enoyl-[acyl-carrier-protein] reductase [NADH] | 2  |                       | AIPNYNVMLAK                              | 151 | 12 | 7  | 65.53 | b1b4b5b7b9b10y12             | 1290.70 | 58.527  | 22834  | 2 | 645.85  | 7.28   |
| [P16657]FABI_SALTY Enoyl-[acyl-carrier-protein] reductase [NADH] | 3  |                       | FDGFVHSIGFAPGDQLDGDYVNA VTR              | 84  | 26 | 4  | 22.28 | b2b10b11y5                   | 2797.34 | 82.951  | 13813  | 3 | 933.12  | 6.46   |
| [P16657]FABI_SALTY Enoyl-[acyl-carrier-protein] reductase [NADH] | 4  |                       | TMLNPGSALLTLSYLGAER                      | 132 | 19 | 11 | 40.61 | b2b5b8*b8y1y2y4y7y8y15y19    | 2007.07 | 101.728 | 13025  | 2 | 1004.04 | 6.14   |
| [P16657]FABI_SALTY Enoyl-[acyl-carrier-protein] reductase [NADH] | 5  |                       | VNAISAGPIR                               | 183 | 10 | 6  | 40.46 | b2b3b5°b5y6y8                | 997.57  | 44.890  | 8456   | 2 | 499.29  | -11.44 |
| [P16657]FABI_SALTY Enoyl-[acyl-carrier-protein] reductase [NADH] | 6  |                       | YMANAMGPEGVR                             | 171 | 12 | 5  | 30.23 | b2y6y9°y9y10                 | 1295.59 | 45.501  | 6440   | 2 | 648.30  | 3.96   |
| [P16657]FABI_SALTY Enoyl-[acyl-carrier-protein] reductase [NADH] | 7  |                       | LSIAYGIAQAMHR                            | 17  | 13 | 6  | 56.22 | b10b12y4y5y9y11              | 1430.74 | 71.311  | 8353   | 3 | 477.58  | -14.50 |
| [P16657]FABI_SALTY Enoyl-[acyl-carrier-protein] reductase [NADH] | 8  |                       | VAHDISSYSFVAMAK                          | 114 | 15 | 3  | 24.83 | b10b11y11                    | 1625.77 | 77.669  | 7084   | 2 | 813.39  | -16.67 |
| [P16657]FABI_SALTY Enoyl-[acyl-carrier-protein] reductase [NADH] | 9  | Carbamidomethyl+C(16) | VEEFAAQLGSSIVLPCDVAEDASI DAMFAELGNVWPK   | 47  | 37 | 10 | 49.42 | b4°b4b5°b5b6b7*b7b12y10°y10  | 3978.99 | 68.489  | 5375   | 5 | 796.60  | 19.08  |
| [P16657]FABI_SALTY Enoyl-[acyl-carrier-protein] reductase [NADH] | 10 |                       | TMLNPGSALLTLSYLGAERAIIPNY NVMLAK         | 132 | 31 | 4  | 11.47 | b5°b5b11y10                  | 3278.75 | 88.202  | 56642  | 5 | 656.56  | 7.30   |
| [P16657]FABI_SALTY Enoyl-[acyl-carrier-protein] reductase [NADH] | 11 | Carbamidomethyl+C(18) | GRVEEFAAQLGSSIVLPCDVAEDA SIDAMFAELGNVWPK | 45  | 39 | 3  | 22.91 | b5b6y16                      | 4192.03 | 93.911  | 24063  | 5 | 839.21  | -0.82  |
| [P16657]FABI_SALTY Enoyl-[acyl-carrier-protein] reductase [NADH] | 12 |                       | EGFKVAHDISSYSFVAMAK                      | 110 | 19 | 3  | 23.27 | b8b9y8                       | 2087.02 | 97.425  | 17457  | 3 | 696.35  | -1.05  |
| [P16657]FABI_SALTY Enoyl-[acyl-carrier-protein] reductase [NADH] | 13 |                       | AIPNYNVMLAKASLEANVR                      | 151 | 20 | 3  | 24.32 | b6b9b10                      | 2131.13 | 94.395  | 5498   | 3 | 711.05  | -3.32  |
| [P16657]FABI_SALTY Enoyl-[acyl-carrier-protein] reductase [NADH] | 14 | Carbamidomethyl+C(17) | VAHDISSYSFVAMAKACR                       | 114 | 18 | 3  | 25.08 | y3y4y6                       | 2012.95 | 77.857  | 5067   | 4 | 503.99  | -10.67 |
| [P16657]FABI_SALTY Enoyl-[acyl-carrier-protein] reductase [NADH] | 15 | Oxidation+M(2)        | TMLNPGSALLTLSYLGAER                      | 132 | 19 | 5  | 26.74 | b3°b3b8b9y3                  | 2023.04 | 87.842  | 3640   | 2 | 1012.02 | -8.21  |

|                                                              |    |                   |                                  |     |    |    |        |                                                                           |         |         |        |   |         |        |
|--------------------------------------------------------------|----|-------------------|----------------------------------|-----|----|----|--------|---------------------------------------------------------------------------|---------|---------|--------|---|---------|--------|
| P0AA07 PTHP_SALTY Phohocarrier protein HPr                   | 1  |                   | MFQQEVTITAPNGLHTRPAAQFVK         | 0   | 24 | 21 | 122.14 | b2b3*b3b5b6b7*b7b8*b8*b8y1y2y9y10y13y14y16y18y19y20y24                    | 2684.37 | 63.940  | 410651 | 4 | 671.85  | -9.91  |
| P0AA07 PTHP_SALTY Phohocarrier protein HPr                   | 2  |                   | GFTSEITVTSNGK                    | 27  | 13 | 12 | 49.68  | b2b5b11*b11*b11y10y11*y11y12*y12y13*y13                                   | 1340.67 | 51.413  | 24677  | 2 | 670.84  | 0.46   |
| P0AA07 PTHP_SALTY Phohocarrier protein HPr                   | 3  |                   | LQTLGLTQGTVVTTISAEGEDEQKA VEHLVK | 49  | 30 | 25 | 220.59 | b3*b3*b3b6*b6b11*b11y3y8y11y13*y13y14y15y16y17y18y19y20y21y22y23y24y26y28 | 3193.67 | 81.929  | 482463 | 4 | 799.17  | -8.49  |
| P0AA07 PTHP_SALTY Phohocarrier protein HPr                   | 4  |                   | FQQEVTITAPNGLHTRPAAQFVKEAK       | 1   | 26 | 3  | 12.5   | b9b13y3                                                                   | 2881.55 | 99.608  | 2092   | 4 | 721.14  | 4.58   |
| P0AA07 PTHP_SALTY Phohocarrier protein HPr                   | 5  | Phosphoryl STY(9) | GFTSEITVTSNGK                    | 27  | 13 | 4  | 26.13  | b4y3*y3y4                                                                 | 1420.61 | 60.153  | 7520   | 3 | 474.21  | -12.80 |
| Q8ZRC9 YAJQ_SALTY UPF0234 protein yajQ                       | 1  |                   | VLSESDFQVNQLLDILR                | 49  | 17 | 6  | 42.82  | b13y3y4y5y13y17                                                           | 1989.08 | 105.382 | 32982  | 2 | 995.04  | 6.32   |
| Q8ZRC9 YAJQ_SALTY UPF0234 protein yajQ                       | 2  |                   | SRDDLQSVMLVR                     | 135 | 13 | 6  | 33.35  | b4b6b7b13*b13y5                                                           | 1489.78 | 76.169  | 30838  | 2 | 745.39  | -0.49  |
| Q8ZRC9 YAJQ_SALTY UPF0234 protein yajQ                       | 3  |                   | GIEGASLDVPDEFVHSGK               | 72  | 18 | 8  | 44.89  | b2b10*b10y5y6y11y12y18                                                    | 1856.89 | 67.625  | 21152  | 3 | 619.63  | -8.61  |
| Q8ZRC9 YAJQ_SALTY UPF0234 protein yajQ                       | 4  |                   | PSFDIVSEVDLQEAR                  | 1   | 15 | 3  | 24.83  | b5y3y4                                                                    | 1704.83 | 67.622  | 2627   | 3 | 568.95  | -7.23  |
| Q8ZRC9 YAJQ_SALTY UPF0234 protein yajQ                       | 5  |                   | TWYVEAK                          | 90  | 7  | 4  | 41.35  | b5y4*y4y6                                                                 | 896.45  | 47.966  | 16016  | 2 | 448.73  | -6.94  |
| Q8ZRC9 YAJQ_SALTY UPF0234 protein yajQ                       | 6  |                   | GGDLGQPFQFK                      | 148 | 11 | 4  | 37.82  | b4y3y7y8                                                                  | 1193.59 | 60.821  | 15153  | 2 | 597.30  | -1.94  |
| Q8ZRC9 YAJQ_SALTY UPF0234 protein yajQ                       | 7  |                   | VQAQIQGEEIR                      | 120 | 11 | 4  | 36.84  | y4y6*y6y9                                                                 | 1270.67 | 40.132  | 6904   | 2 | 635.84  | -0.38  |
| Q8ZRC9 YAJQ_SALTY UPF0234 protein yajQ                       | 8  |                   | MPSFDIVSEVDLQEARNGVDNAV R        | 0   | 24 | 8  | 41.32  | b4b8b11b12*b12y7y13y19                                                    | 2661.30 | 113.124 | 8252   | 3 | 887.77  | 1.10   |
| Q8ZRC9 YAJQ_SALTY UPF0234 protein yajQ                       | 9  |                   | RGIEGASLDVPDEFVHSGK              | 71  | 19 | 4  | 32.46  | y6y7y11y14                                                                | 2013.01 | 80.081  | 7639   | 3 | 671.68  | 3.46   |
| Q8ZRC9 YAJQ_SALTY UPF0234 protein yajQ                       | 10 |                   | FDFRGVEATIELNDANK                | 29  | 17 | 5  | 35.24  | b4b6b7y5y10                                                               | 1938.97 | 71.119  | 2766   | 3 | 647.00  | 7.62   |
| Q8ZRC9 YAJQ_SALTY UPF0234 protein yajQ                       | 11 |                   | NGVDNAVREVESR                    | 16  | 13 | 3  | 28.84  | y6y11y12                                                                  | 1444.72 | 61.275  | 2292   | 2 | 722.86  | 1.10   |
| Q8ZRC9 YAJQ_SALTY UPF0234 protein yajQ                       | 12 | Oxidation+M(1)    | MPSFDIVSEVDLQEAR                 | 0   | 16 | 7  | 55.58  | y6*y6*y6y7y8y10y11                                                        | 1851.89 | 76.793  | 2236   | 2 | 926.45  | 4.61   |
| Q8ZRC9 YAJQ_SALTY UPF0234 protein yajQ                       | 13 |                   | IVSEVDLQEAR                      | 5   | 11 | 0  | 3.77   |                                                                           | 1258.67 | 67.660  | 11879  | 2 | 629.84  | 1.84   |
| Q8ZRC9 YAJQ_SALTY UPF0234 protein yajQ                       | 14 |                   | EGASLDVPDEFVHSGK                 | 74  | 16 | 0  | 4.9    |                                                                           | 1686.79 | 67.618  | 1916   | 2 | 843.90  | -2.75  |
| Q8ZQD4 LOLA_SALTY Outer-membrane lipoprotein carrier protein | 1  |                   | TLWFYNPFVEQATATWLK               | 85  | 18 | 10 | 57.42  | b3*b3b6y2y4y9y12y13y14y18                                                 | 2215.15 | 116.484 | 36307  | 2 | 1108.08 | 10.69  |
| Q8ZQD4 LOLA_SALTY Outer-membrane lipoprotein carrier protein | 2  |                   | DATGNTPFMLIAR                    | 103 | 13 | 4  | 21.36  | b6y7y10y13                                                                | 1406.71 | 79.115  | 30767  | 2 | 703.86  | -0.26  |
| Q8ZQD4 LOLA_SALTY Outer-membrane lipoprotein carrier protein | 3  |                   | TLWFYNPFVEQATATWLKDATG NTPFMLIAR | 85  | 31 | 8  | 14.39  | b2b4b6*b6y1y7y25y31                                                       | 3602.84 | 129.942 | 11881  | 3 | 1201.62 | 7.18   |
| Q8ZQD4 LOLA_SALTY Outer-membrane lipoprotein carrier protein | 4  |                   | FTFTPPQGVTIDDQR                  | 187 | 15 | 5  | 26.89  | b3*b3b9b10*b10                                                            | 1721.88 | 57.488  | 2455   | 3 | 574.63  | 15.03  |
| Q8ZQD4 LOLA_SALTY Outer-membrane lipoprotein carrier protein | 5  |                   | SQQNGAVDPSK                      | 176 | 11 | 7  | 57.38  | b9y6y7y9*y9y10*y10                                                        | 1130.55 | 92.283  | 1945   | 1 | 1130.55 | 1.84   |

|                                                              |    |                                          |                                           |     |    |    |       |                           |         |         |        |   |         |        |
|--------------------------------------------------------------|----|------------------------------------------|-------------------------------------------|-----|----|----|-------|---------------------------|---------|---------|--------|---|---------|--------|
| Q8ZQD4 LOLA_SALTY Outer-membrane lipoprotein carrier protein | 6  |                                          | NQASDWQQYNIKQDGDNFVLTPK                   | 116 | 23 | 3  | 22.52 | b3y20y21                  | 2709.30 | 68.686  | 54562  | 3 | 903.77  | 3.42   |
| Q8ZQD4 LOLA_SALTY Outer-membrane lipoprotein carrier protein | 7  | Carbamidomethyl+C(5)                     | MAIACALLSSVVASSVWADAASSLKSR               | 3   | 27 | 5  | 26.94 | b8b9b12y11y13             | 2751.41 | 74.901  | 8196   | 3 | 917.81  | -2.84  |
| Q8ZQD4 LOLA_SALTY Outer-membrane lipoprotein carrier protein | 8  |                                          | SAYQLKSQQNGAVDPSK                         | 170 | 17 | 7  | 44.14 | b7b9*b9b12y4y7y14         | 1820.90 | 60.819  | 5190   | 2 | 910.96  | -5.23  |
| Q8ZQD4 LOLA_SALTY Outer-membrane lipoprotein carrier protein | 9  |                                          | VTDGSGAAVQEGQGDLWVKRPNLFNWHMTQPDESILVSDGK | 44  | 41 | 5  | 15.71 | b6b9b11y5y10              | 4482.16 | 85.018  | 2793   | 4 | 1121.29 | -5.01  |
| Q8ZQD4 LOLA_SALTY Outer-membrane lipoprotein carrier protein | 10 |                                          | VSSFHATFTQKVTDGSGAAVQEGQGDLWVK            | 33  | 30 | 4  | 11.63 | b4b6y12°y12               | 3150.56 | 97.880  | 2378   | 3 | 1050.86 | 2.79   |
| Q8ZRN1 METQ_SALTY D-methionine-binding lipoprotein metQ      | 1  |                                          | IVELEAPQLPR                               | 178 | 11 | 6  | 36.84 | b2y1y5y6y7y11             | 1264.72 | 67.042  | 66225  | 2 | 632.86  | -3.67  |
| Q8ZRN1 METQ_SALTY D-methionine-binding lipoprotein metQ      | 2  |                                          | LKDGVGLLPTSLDIVENPK                       | 156 | 19 | 7  | 32.46 | y2y4*y4y5y7y11y19         | 2008.12 | 79.849  | 33401  | 3 | 670.04  | -7.11  |
| Q8ZRN1 METQ_SALTY D-methionine-binding lipoprotein metQ      | 3  |                                          | SLDELKDGSQVAVPNDPTNLGR                    | 122 | 22 | 7  | 18.96 | b7°b7b13y2y6y9y22         | 2325.17 | 58.629  | 17522  | 3 | 775.73  | 2.63   |
| Q8ZRN1 METQ_SALTY D-methionine-binding lipoprotein metQ      | 4  |                                          | FVQAYQSDEVYEAANK                          | 245 | 16 | 8  | 39.15 | b7y2y4y6*y6y10y11y16      | 1861.87 | 51.765  | 15770  | 2 | 931.44  | 6.82   |
| Q8ZRN1 METQ_SALTY D-methionine-binding lipoprotein metQ      | 5  |                                          | TFVYPIAGYSK                               | 108 | 11 | 4  | 48.61 | y3y4y5y8                  | 1245.66 | 49.611  | 2418   | 2 | 623.33  | 8.53   |
| Q8ZRN1 METQ_SALTY D-methionine-binding lipoprotein metQ      | 6  |                                          | DGIFVEDK                                  | 215 | 8  | 3  | 33.95 | b6y4y5                    | 922.47  | 53.101  | 67109  | 2 | 461.74  | 16.08  |
| Q8ZRN1 METQ_SALTY D-methionine-binding lipoprotein metQ      | 7  |                                          | DGSQVAVPNDPTNLGR                          | 128 | 16 | 5  | 46.93 | b3b4b6b7y3                | 1639.79 | 67.600  | 15798  | 3 | 547.27  | -10.12 |
| Q8ZRN1 METQ_SALTY D-methionine-binding lipoprotein metQ      | 8  |                                          | SLDELK                                    | 122 | 6  | 2  | 13.91 | y4°y4                     | 704.39  | 50.588  | 5509   | 1 | 704.39  | 5.98   |
| Q8ZRN1 METQ_SALTY D-methionine-binding lipoprotein metQ      | 9  |                                          | FVQAYQSDEVYEAANKVFNGGAVK                  | 245 | 24 | 10 | 84.6  | b3b4*b4b5b6b7y3y6y14y22   | 2634.29 | 78.196  | 37936  | 3 | 878.77  | 3.15   |
| Q8ZRN1 METQ_SALTY D-methionine-binding lipoprotein metQ      | 10 | Phosphoryl STY(10)                       | LKDGVGLLPTSLDIVENPK                       | 156 | 19 | 4  | 34.22 | y4y7y9y11                 | 2088.11 | 85.138  | 330479 | 3 | 696.71  | 11.46  |
| Q8ZRN1 METQ_SALTY D-methionine-binding lipoprotein metQ      | 11 | Carbamidomethyl+C(17);Phosphoryl STY(11) | TFAAVGALIGSLALAGCGQDEK                    | 6   | 22 | 3  | 22.66 | b12y10y11                 | 2229.03 | 89.949  | 3479   | 2 | 1115.02 | -8.87  |
| P66541 RS2_SALTY 30S ribosomal protein S2                    | 1  |                                          | TVPMFNEALAELENK                           | 45  | 14 | 9  | 31.75 | b7b14*b14y1y9*y9y10y12y14 | 1576.82 | 85.057  | 60369  | 2 | 788.91  | 8.13   |
| P66541 RS2_SALTY 30S ribosomal protein S2                    | 2  |                                          | WLGGMLTNWK                                | 95  | 10 | 6  | 34.7  | b1y2y3y8y9y10             | 1205.61 | 85.663  | 49687  | 2 | 603.31  | -2.63  |
| P66541 RS2_SALTY 30S ribosomal protein S2                    | 3  | Carbamidomethyl+C(13)                    | AASEAVKEAANSCDQFFVNHR                     | 74  | 21 | 7  | 22.51 | b2b5b10b12°b12y6y21       | 2351.08 | 54.892  | 17010  | 3 | 784.37  | -0.93  |
| P66541 RS2_SALTY 30S ribosomal protein S2                    | 4  |                                          | EANNLGIPVFAIVDNTSDPDGVDFVIPGNDDAIR        | 174 | 34 | 4  | 11.13 | b2b5y13y22                | 3569.77 | 101.776 | 1856   | 5 | 714.76  | 7.73   |
| P66541 RS2_SALTY 30S ribosomal protein S2                    | 5  |                                          | AGVHFHGQTR                                | 11  | 10 | 4  | 29.47 | b6b7y4°y4                 | 1109.56 | 46.890  | 9479   | 2 | 555.28  | -4.07  |

|                                                    |    |                       |                                    |     |    |    |       |                           |         |         |       |   |         |        |
|----------------------------------------------------|----|-----------------------|------------------------------------|-----|----|----|-------|---------------------------|---------|---------|-------|---|---------|--------|
| [P66541]RS2_SALTY 30S ribosomal protein S2         | 6  |                       | ELEKLENSLGGIK                      | 139 | 13 | 4  | 30.6  | b3b10b12°b12              | 1429.78 | 59.606  | 3274  | 2 | 715.39  | -7.85  |
| [P66541]RS2_SALTY 30S ribosomal protein S2         | 7  |                       | EGRSQDLASQAEEFVEAE                 | 222 | 19 | 4  | 21.57 | b3b11y5y9                 | 2081.94 | 73.862  | 2641  | 4 | 521.24  | 5.04   |
| [P66541]RS2_SALTY 30S ribosomal protein S2         | 8  |                       | TVPMFNEALAELENKISAR                | 45  | 18 | 3  | 25.08 | b7b11b12                  | 2004.08 | 111.663 | 1963  | 3 | 668.70  | 10.23  |
| [P66541]RS2_SALTY 30S ribosomal protein S2         | 9  |                       | AGVHFHGQTRYWNPK                    | 11  | 15 | 4  | 44.68 | b5b6b9b10                 | 1797.89 | 92.627  | 1721  | 2 | 899.45  | -0.61  |
| [P66541]RS2_SALTY 30S ribosomal protein S2         | 10 | Oxidation+M(11)       | LENSLGGIKDMGGLPDALFVIDAD HEHIAIK   | 143 | 31 | 4  | 11.47 | b11b14°b14y12             | 3304.68 | 103.462 | 18928 | 4 | 826.93  | -1.70  |
| [P66541]RS2_SALTY 30S ribosomal protein S2         | 11 | Oxidation+M(6)        | MATVSMRMDLK                        | 0   | 11 | 3  | 25.08 | b5b8y10                   | 1298.64 | 79.019  | 1615  | 2 | 649.82  | 10.81  |
| [P00929]TRPA_SALTY Tryptophan synthase alpha chain | 1  |                       | HPTIPIGLLMYANLVFNNGIDAFY AR        | 91  | 26 | 6  | 40.2  | y1y4y5y10y11y26           | 2920.51 | 105.917 | 15598 | 3 | 974.18  | -1.84  |
| [P00929]TRPA_SALTY Tryptophan synthase alpha chain | 2  |                       | IIDLIDAGADALELGVFSDPLAD GPTIQNANLR | 35  | 35 | 10 | 28.57 | b1b4°b4b5°b5b13y1y6y14y16 | 3605.84 | 112.098 | 11398 | 4 | 902.21  | -9.07  |
| [P00929]TRPA_SALTY Tryptophan synthase alpha chain | 3  |                       | EGAFVPFVTLGDPGIEQSLK               | 15  | 20 | 6  | 14.9  | b5°b5b7°b7y15y20          | 2104.11 | 94.815  | 7564  | 2 | 1052.56 | 8.12   |
| [P00929]TRPA_SALTY Tryptophan synthase alpha chain | 4  | Carbamidomethyl+C(9)  | HNIAPIFICPPNADDDLLR                | 145 | 19 | 4  | 15.49 | b5b12y12°y12              | 2191.12 | 85.602  | 6694  | 3 | 731.05  | 11.48  |
| [P00929]TRPA_SALTY Tryptophan synthase alpha chain | 5  |                       | AGAAGAISGSAIVK                     | 225 | 14 | 6  | 56.29 | b6b8b9°b9b10b12           | 1172.67 | 76.040  | 4303  | 2 | 586.84  | 2.08   |
| [P00929]TRPA_SALTY Tryptophan synthase alpha chain | 6  |                       | YENLFAQLNDRR                       | 3   | 12 | 3  | 23.03 | b4b11y4                   | 1538.75 | 77.270  | 2668  | 3 | 513.59  | -11.58 |
| [P00929]TRPA_SALTY Tryptophan synthase alpha chain | 7  | Carbamidomethyl+C(11) | AFAAGVTPAQCFEMLALIR                | 70  | 19 | 5  | 29.35 | b3b13°b13y12y13           | 2066.05 | 102.068 | 15726 | 2 | 1033.53 | -2.60  |
| [P00929]TRPA_SALTY Tryptophan synthase alpha chain | 8  |                       | QMLAELR                            | 249 | 7  | 3  | 38.34 | b3b4y6                    | 860.48  | 36.479  | 15413 | 2 | 430.74  | 12.27  |
| [P00929]TRPA_SALTY Tryptophan synthase alpha chain | 9  |                       | YENLFAQLNDR                        | 3   | 11 | 3  | 25.08 | b7y4y8                    | 1382.69 | 40.215  | 3046  | 2 | 691.85  | 15.45  |
| [P00929]TRPA_SALTY Tryptophan synthase alpha chain | 10 | Carbamidomethyl+C(1)  | CEQVGVDSVLVADVPVEESAPFR            | 117 | 23 | 6  | 29.31 | b10°b10b12b13y9y13        | 2502.19 | 81.780  | 2342  | 2 | 1251.60 | -11.71 |
| [P00929]TRPA_SALTY Tryptophan synthase alpha chain | 11 |                       | QVASYGRGYTYLLSR                    | 164 | 15 | 3  | 26.89 | b3b10b12                  | 1733.92 | 51.471  | 3629  | 3 | 578.65  | 14.93  |
| [P00929]TRPA_SALTY Tryptophan synthase alpha chain | 12 | Carbamidomethyl+C(14) | QAALRHNIAPIFICPPNADDDLLR           | 140 | 24 | 4  | 19.43 | y6y8y11°y11               | 2730.42 | 118.708 | 2922  | 3 | 910.81  | 2.32   |
| [P00929]TRPA_SALTY Tryptophan synthase alpha chain | 13 |                       | SGVTGAENRGALPLHHLIEK               | 179 | 20 | 5  | 21.69 | b5°b5b10°b10b13           | 2099.11 | 85.805  | 2215  | 2 | 1050.06 | -12.79 |
| [P00929]TRPA_SALTY Tryptophan synthase alpha chain | 14 | Carbamidomethyl+C(9)  | HNIAPIFICPPNADDDLLRQVASYG R        | 145 | 26 | 4  | 18.96 | b3b5b10y6                 | 2952.52 | 112.323 | 1918  | 3 | 984.84  | 12.65  |
| [P00929]TRPA_SALTY Tryptophan synthase alpha chain | 15 | Phosphoryl STY(10)    | REGAFVPFVTLGDPGIEQSLK              | 14  | 21 | 3  | 14.38 | b8b10y3                   | 2340.13 | 67.407  | 3688  | 2 | 1170.57 | -11.48 |
| [P66643]RS9_SALTY 30S ribosomal protein S9         | 1  |                       | SLEQYFGR                           | 33  | 8  | 10 | 49.24 | b2°b2b3°b3b4°b4°b4y5y6y8  | 999.48  | 60.869  | 41040 | 2 | 500.25  | -5.25  |
| [P66643]RS9_SALTY 30S ribosomal protein S9         | 2  |                       | GGGISGQAGAIR                       | 68  | 12 | 6  | 27.01 | b4b5°b5y1y8y12            | 1043.55 | 34.004  | 15804 | 2 | 522.28  | -7.95  |
| [P66643]RS9_SALTY 30S ribosomal protein S9         | 3  |                       | GELR                               | 95  | 4  | 1  | 13.16 | y3                        | 474.26  | 44.146  | 20156 | 1 | 474.26  | -13.19 |
| [P66643]RS9_SALTY 30S ribosomal protein S9         | 4  |                       | AGFVTRDAR                          | 100 | 9  | 3  | 31.32 | b5b7y7                    | 992.52  | 86.137  | 9974  | 2 | 496.76  | -4.86  |
| [P66643]RS9_SALTY 30S ribosomal protein S9         | 5  |                       | MVVRQPLELVDMVEK                    | 45  | 15 | 4  | 24.83 | b12y7°y7y8                | 1785.97 | 106.532 | 2182  | 2 | 893.49  | 5.33   |
| [P66643]RS9_SALTY 30S ribosomal protein S9         | 6  |                       | ALMEYDESLRGELR                     | 85  | 14 | 4  | 31.75 | b12y9y10y13               | 1681.84 | 83.490  | 1799  | 2 | 841.42  | 9.73   |
| [P66643]RS9_SALTY 30S ribosomal protein S9         | 7  |                       | DARQVER                            | 106 | 7  | 5  | 41.35 | b3b5°b5b6°b6              | 873.46  | 67.917  | 1638  | 1 | 873.46  | 5.38   |
| [P66643]RS9_SALTY 30S ribosomal protein S9         | 8  |                       | ISGQAGAIR                          | 71  | 9  | 1  | 7.72  | b8                        | 872.50  | 33.964  | 39910 | 2 | 436.75  | 7.56   |

|                                                               |    |                                          |                                     |     |    |    |       |                               |         |         |       |   |         |        |
|---------------------------------------------------------------|----|------------------------------------------|-------------------------------------|-----|----|----|-------|-------------------------------|---------|---------|-------|---|---------|--------|
| P55900 SERC_SALTY Phohoserine aminotransferase                | 1  |                                          | ASIYNAMPIEGVK                       | 335 | 13 | 5  | 21.36 | b3°b3b5y9*y9                  | 1392.71 | 59.713  | 52823 | 3 | 464.91  | -7.36  |
| P55900 SERC_SALTY Phohoserine aminotransferase                | 2  | Carbamidomethyl+C(7)                     | LAQQELCDWHGLGTSVMEISHR              | 20  | 22 | 12 | 95.69 | b3b4y1y3y4y6y7y9y12°y12y13y14 | 2567.18 | 74.666  | 28758 | 4 | 642.55  | -12.27 |
| P55900 SERC_SALTY Phohoserine aminotransferase                | 3  |                                          | AQVFNFSSGPAMPLPAEVLK                | 1   | 19 | 9  | 53.62 | b3b8b9y1y3y6y13y16y19         | 2006.06 | 92.108  | 23259 | 2 | 1003.53 | 10.34  |
| P55900 SERC_SALTY Phohoserine aminotransferase                | 4  |                                          | GKEFIQVAEEAEQDFR                    | 42  | 16 | 5  | 24.33 | b13y3y4y10°y16                | 1895.93 | 53.208  | 12090 | 3 | 632.65  | 10.24  |
| P55900 SERC_SALTY Phohoserine aminotransferase                | 5  |                                          | TTADYVDAGYWAASAIK                   | 91  | 17 | 4  | 16.93 | b4°b4b13y11                   | 1802.88 | 109.181 | 1560  | 2 | 901.94  | 11.98  |
| P55900 SERC_SALTY Phohoserine aminotransferase                | 6  |                                          | NDVAQANR                            | 287 | 8  | 4  | 55.27 | b3b6y5y7                      | 887.41  | 50.710  | 4839  | 1 | 887.41  | -21.53 |
| P55900 SERC_SALTY Phohoserine aminotransferase                | 7  |                                          | AELLYGVIDNSDFYR                     | 272 | 15 | 4  | 30.42 | b6y4y5y10                     | 1774.86 | 68.487  | 1896  | 2 | 887.93  | -4.95  |
| P55900 SERC_SALTY Phohoserine aminotransferase                | 8  |                                          | MAQVFNFSSGPAMPLPAEVLK               | 0   | 20 | 3  | 21.69 | b4b8b10                       | 2137.13 | 90.902  | 1532  | 2 | 1069.07 | 20.22  |
| P55900 SERC_SALTY Phohoserine aminotransferase                | 9  |                                          | YGVIIYAGAQK                         | 188 | 10 | 3  | 27.71 | b6b8y4                        | 1069.55 | 44.785  | 1508  | 2 | 535.28  | -17.80 |
| P55900 SERC_SALTY Phohoserine aminotransferase                | 10 | Carbamidomethyl+C(3)                     | KYCAPQIIDAK                         | 111 | 11 | 4  | 32.07 | b7b8b10°b10                   | 1306.67 | 67.480  | 91738 | 2 | 653.84  | -8.41  |
| P55900 SERC_SALTY Phohoserine aminotransferase                | 11 |                                          | GQFAGVPLNLLGDKTTADYVDA<br>GYWAASAIK | 77  | 31 | 5  | 22.36 | b6°b6b7b25y25                 | 3212.65 | 97.762  | 19387 | 3 | 1071.55 | 7.07   |
| P55900 SERC_SALTY Phohoserine aminotransferase                | 12 |                                          | AELLYGVIDNSDFYRNDVAQANR             | 272 | 23 | 5  | 20.88 | b12y10y12y14*y14              | 2643.30 | 79.852  | 9164  | 3 | 881.77  | 7.57   |
| P55900 SERC_SALTY Phohoserine aminotransferase                | 13 |                                          | WLKAQGGVAAMHK                       | 254 | 13 | 3  | 21.36 | b7y3y5                        | 1396.75 | 50.604  | 7646  | 3 | 466.25  | -4.02  |
| P55900 SERC_SALTY Phohoserine aminotransferase                | 14 |                                          | VVGGMRASINYAMPIEGVK                 | 329 | 19 | 7  | 42.37 | b6b12°b12b14b17y11y13         | 1992.01 | 64.003  | 3888  | 2 | 996.51  | -12.99 |
| P55900 SERC_SALTY Phohoserine aminotransferase                | 15 |                                          | TTADYVDAGYWAASAIKEAK                | 91  | 20 | 3  | 14.9  | b4b6y13                       | 2131.03 | 69.783  | 3756  | 4 | 533.51  | -2.29  |
| P55900 SERC_SALTY Phohoserine aminotransferase                | 16 | Carbamidomethyl+C(7);<br>Oxidation+M(17) | LAQQELCDWHGLGTSVMEISHR              | 20  | 22 | 4  | 13.91 | b7b9y12°y12                   | 2583.21 | 92.200  | 9240  | 4 | 646.56  | 0.19   |
| P55900 SERC_SALTY Phohoserine aminotransferase                | 17 | Oxidation+M(1)                           | MNVPFQLADNTLDK                      | 297 | 14 | 4  | 32.54 | b6b9b12y12                    | 1621.81 | 88.548  | 8820  | 2 | 811.41  | 11.06  |
| P55900 SERC_SALTY Phohoserine aminotransferase                | 18 | Oxidation+M(12)                          | AQVFNFSSGPAMPLPAEVLK                | 1   | 19 | 4  | 42.01 | b3b4b7b8                      | 2022.03 | 82.324  | 4141  | 2 | 1011.52 | -3.44  |
| Q8ZRP0 YAET_SALTY Outer membrane protein assembly factor yaeT | 1  |                                          | ALFATGNFEDVR                        | 64  | 12 | 8  | 70.62 | b3y4y7y9y10*y10y11y12         | 1339.67 | 68.945  | 20931 | 2 | 670.34  | 1.09   |
| Q8ZRP0 YAET_SALTY Outer membrane protein assembly factor yaeT | 2  |                                          | VAVGAALLSMPVR                       | 36  | 13 | 3  | 35.83 | y4y5y6                        | 1283.75 | 77.598  | 14381 | 2 | 642.38  | -0.76  |
| Q8ZRP0 YAET_SALTY Outer membrane protein assembly factor yaeT | 3  |                                          | LSNMQPQIAMDR                        | 535 | 12 | 4  | 30.23 | y5y7y8*y8                     | 1403.68 | 51.872  | 6118  | 2 | 702.34  | 2.52   |
| Q8ZRP0 YAET_SALTY Outer membrane protein assembly factor yaeT | 4  |                                          | AEQFQFNIGK                          | 792 | 10 | 4  | 42.22 | b5b8y3y4                      | 1181.60 | 41.603  | 4359  | 3 | 394.54  | 2.89   |
| Q8ZRP0 YAET_SALTY Outer membrane protein assembly factor yaeT | 5  |                                          | SYGTDVTLGFPINEYNTLR                 | 507 | 19 | 3  | 24.67 | b10b11b13                     | 2160.08 | 101.277 | 2163  | 2 | 1080.54 | 8.82   |
| Q8ZRP0 YAET_SALTY Outer membrane protein assembly factor yaeT | 6  |                                          | VSLDTATYVPIDNDHK                    | 606 | 16 | 5  | 28.62 | b12y4y8y10°y10                | 1787.86 | 59.212  | 1926  | 3 | 596.63  | -9.70  |
| Q8ZRP0 YAET_SALTY Outer membrane protein assembly factor yaeT | 7  |                                          | TGDTVNDEDISNTIR                     | 49  | 15 | 3  | 24.83 | b4y10y11                      | 1649.76 | 48.569  | 9538  | 2 | 825.39  | 1.78   |



|                                                                |    |                    |                                      |     |    |   |       |                        |         |         |       |   |         |        |
|----------------------------------------------------------------|----|--------------------|--------------------------------------|-----|----|---|-------|------------------------|---------|---------|-------|---|---------|--------|
| [Q8ZRP0]YAET_SALTY Outer membrane protein assembly factor yaeT | 8  |                    | YLESMGQSADTSSFAADDFTFNY<br>GWTYNK    | 547 | 29 | 5 | 22.22 | b14y10*y10y11*y11      | 3316.38 | 90.713  | 8515  | 4 | 829.85  | -7.14  |
| [Q8ZRP0]YAET_SALTY Outer membrane protein assembly factor yaeT | 9  |                    | AVVTPLPR                             | 152 | 8  | 3 | 41.73 | y4y5y6                 | 852.52  | 44.780  | 5995  | 2 | 426.76  | -16.82 |
| [Q8ZRP0]YAET_SALTY Outer membrane protein assembly factor yaeT | 10 |                    | VQSQPEINDADK                         | 321 | 12 | 3 | 23.03 | b11y8y11               | 1343.62 | 63.794  | 2480  | 3 | 448.54  | -19.81 |
| [Q8ZRP0]YAET_SALTY Outer membrane protein assembly factor yaeT | 11 |                    | WVVLGR                               | 622 | 6  | 1 | 13.91 | b3                     | 729.44  | 47.911  | 2010  | 1 | 729.44  | -3.01  |
| [Q8ZRP0]YAET_SALTY Outer membrane protein assembly factor yaeT | 12 |                    | LGFFETVDTDTQR                        | 391 | 13 | 5 | 42.38 | y3y9°y9y11y12          | 1528.76 | 76.944  | 1910  | 3 | 510.26  | 20.52  |
| [Q8ZRP0]YAET_SALTY Outer membrane protein assembly factor yaeT | 13 |                    | VTIPGSDNEYK                          | 594 | 12 | 4 | 27.01 | b10*b10y8y9            | 1385.67 | 119.885 | 1844  | 2 | 693.34  | 5.02   |
| [Q8ZRP0]YAET_SALTY Outer membrane protein assembly factor yaeT | 14 |                    | FNIDSTQVSLTPDK                       | 237 | 14 | 3 | 19.98 | b6b9y8                 | 1564.77 | 34.901  | 1589  | 2 | 782.89  | -6.63  |
| [Q8ZRP0]YAET_SALTY Outer membrane protein assembly factor yaeT | 15 |                    | TGDTVNEDEISNTIRALFATGNFE<br>DVR      | 49  | 27 | 3 | 23.09 | b3b13b14               | 2970.38 | 84.423  | 19644 | 4 | 743.35  | -8.14  |
| [Q8ZRP0]YAET_SALTY Outer membrane protein assembly factor yaeT | 16 |                    | LDRGYFPTDGSR                         | 576 | 12 | 3 | 23.03 | b10y5y9                | 1383.68 | 91.655  | 12883 | 2 | 692.35  | 12.97  |
| [Q8ZRP0]YAET_SALTY Outer membrane protein assembly factor yaeT | 17 |                    | FEGNDTSKDSVLR                        | 353 | 13 | 4 | 21.36 | b12y9°y9y11            | 1467.72 | 65.823  | 8866  | 2 | 734.36  | 8.15   |
| [Q8ZRP0]YAET_SALTY Outer membrane protein assembly factor yaeT | 18 |                    | QNLEASGVRVGESLDR                     | 111 | 16 | 5 | 26.17 | b3b4°b4b12*b12         | 1729.86 | 74.808  | 7227  | 2 | 865.43  | -13.13 |
| [Q8ZRP0]YAET_SALTY Outer membrane protein assembly factor yaeT | 19 |                    | VTIPGSDNEYKVS�DTATYVPID<br>NDHK      | 594 | 28 | 3 | 22.22 | b12b13y13              | 3154.52 | 100.738 | 3402  | 4 | 789.39  | 0.39   |
| [Q8ZRP0]YAET_SALTY Outer membrane protein assembly factor yaeT | 20 |                    | LSGVQVSGNLAGHSAEIENLTKE<br>PGELYNGTK | 267 | 33 | 7 | 22.36 | b15°b15*b15y4°y4y5*y5  | 3425.73 | 114.423 | 2823  | 3 | 1142.58 | -7.84  |
| [Q8ZRP0]YAET_SALTY Outer membrane protein assembly factor yaeT | 21 |                    | GYARFNIDSTQVSLTPDK                   | 233 | 18 | 6 | 41.36 | b8*b8b9y3y5y6          | 2012.01 | 55.760  | 1944  | 3 | 671.34  | -0.12  |
| [Q8ZRP0]YAET_SALTY Outer membrane protein assembly factor yaeT | 22 |                    | LAGDLETLRSYYLDR                      | 218 | 15 | 3 | 24.83 | b12y3y4                | 1784.90 | 82.199  | 1664  | 2 | 892.95  | -11.69 |
| [Q8ZRP0]YAET_SALTY Outer membrane protein assembly factor yaeT | 23 |                    | YGYAYPRVQSQPEINDADK                  | 314 | 19 | 3 | 15.49 | b3b12y3                | 2214.05 | 63.163  | 1502  | 4 | 554.27  | 0.00   |
| [Q8ZRP0]YAET_SALTY Outer membrane protein assembly factor yaeT | 24 | Phosphoryl STY(10) | FEGNDTSKDSVLR                        | 353 | 13 | 4 | 30.7  | b3b8y3y11              | 1547.65 | 89.783  | 1728  | 3 | 516.55  | -12.23 |
| [Q8ZRP0]YAET_SALTY Outer membrane protein assembly factor yaeT | 25 |                    | PQIAMDR                              | 540 | 7  | 0 | 2.64  |                        | 830.42  | 51.859  | 4056  | 1 | 830.42  | 3.75   |
| [P0AA02]NUSG_SALTY Transcription antitermination protein nusG  | 1  |                    | VMGFIGGTSDRPAPISDKEVDAIM<br>NR       | 88  | 26 | 9 | 41.25 | b2b3b4y5*y5y7y21y24y26 | 2776.35 | 73.678  | 33953 | 4 | 694.84  | -8.62  |

|                                                              |    |                 |                             |     |    |   |       |                       |         |         |       |   |         |        |
|--------------------------------------------------------------|----|-----------------|-----------------------------|-----|----|---|-------|-----------------------|---------|---------|-------|---|---------|--------|
| P0AA02 NUSG_SALTY Transcription antitermination protein nusG | 2  |                 | WYVVQAFSGFEGR               | 8   | 13 | 6 | 42.69 | b2b5b7y8y10y11        | 1545.76 | 88.288  | 8563  | 2 | 773.39  | 9.79   |
| P0AA02 NUSG_SALTY Transcription antitermination protein nusG | 3  |                 | LQQVGDKPRPK                 | 114 | 11 | 4 | 32.07 | b2y4y5y7              | 1265.71 | 18.200  | 8320  | 3 | 422.58  | -14.18 |
| P0AA02 NUSG_SALTY Transcription antitermination protein nusG | 4  |                 | VMGFIGGTSDRPAPISDK          | 88  | 18 | 9 | 82.27 | b3b7b8b9b10b14y3y6y12 | 1847.92 | 102.787 | 3709  | 2 | 924.46  | -5.48  |
| P0AA02 NUSG_SALTY Transcription antitermination protein nusG | 5  | Oxidation+M(2)  | VMGFIGGTSDRPAPISDK          | 88  | 18 | 3 | 16.16 | b6b8y9                | 1863.93 | 56.986  | 5231  | 3 | 621.98  | 2.29   |
| P0AA02 NUSG_SALTY Transcription antitermination protein nusG | 6  | Oxidation+M(2)  | VMGFIGGTSDRPAPISDKEVDAIM NR | 88  | 26 | 3 | 12.5  | b6y7y12               | 2792.35 | 61.405  | 2702  | 4 | 698.84  | -6.30  |
| P0AA02 NUSG_SALTY Transcription antitermination protein nusG | 7  |                 | VVQAFSGFEGR                 | 10  | 11 | 2 | 7.52  | b8°b8                 | 1196.61 | 88.299  | 4130  | 1 | 1196.61 | 4.18   |
| P67912 HLDD_SALTY ADP-L-glycero-D-manno-heptose-6-epimerase  | 1  |                 | YQAFTQADLTNLR               | 271 | 13 | 7 | 26.13 | b1b2*b2b3*b3y9y10     | 1540.78 | 66.137  | 13289 | 2 | 770.89  | 3.09   |
| P67912 HLDD_SALTY ADP-L-glycero-D-manno-heptose-6-epimerase  | 2  |                 | QILPEANSQIVGFR              | 152 | 14 | 4 | 19.98 | b10y3y12°y12          | 1571.87 | 69.852  | 8731  | 2 | 786.44  | 8.23   |
| P67912 HLDD_SALTY ADP-L-glycero-D-manno-heptose-6-epimerase  | 3  |                 | DFVYVGDVAAVNLWFLESGK        | 209 | 20 | 4 | 14.9  | b3b6y10y20            | 2229.12 | 101.082 | 5563  | 3 | 743.71  | -2.30  |
| P67912 HLDD_SALTY ADP-L-glycero-D-manno-heptose-6-epimerase  | 4  |                 | AESFQAVADATLAYHK            | 239 | 16 | 3 | 17.8  | b4b13y3               | 1721.87 | 60.944  | 1843  | 3 | 574.63  | 12.19  |
| P67912 HLDD_SALTY ADP-L-glycero-D-manno-heptose-6-epimerase  | 5  |                 | GSIEYIPFPDK                 | 256 | 11 | 5 | 42.42 | b5°b5b6y3y4           | 1265.65 | 58.481  | 8667  | 3 | 422.55  | 5.02   |
| P67912 HLDD_SALTY ADP-L-glycero-D-manno-heptose-6-epimerase  | 6  |                 | EIPFLYASSAATYGGR            | 107 | 16 | 4 | 17.8  | b6b11°b11y11          | 1702.86 | 80.095  | 4894  | 2 | 851.94  | 12.33  |
| P67912 HLDD_SALTY ADP-L-glycero-D-manno-heptose-6-epimerase  | 7  |                 | EYEKPLNVYGYSK               | 131 | 13 | 3 | 21.36 | b7y3y5                | 1589.79 | 48.675  | 4129  | 2 | 795.40  | 5.22   |
| P67912 HLDD_SALTY ADP-L-glycero-D-manno-heptose-6-epimerase  | 8  |                 | GRYQAFTQADLTNLR             | 269 | 15 | 6 | 42.46 | b3b8*b8b11°b11b13     | 1753.92 | 83.535  | 8653  | 2 | 877.46  | 10.37  |
| P67912 HLDD_SALTY ADP-L-glycero-D-manno-heptose-6-epimerase  | 9  |                 | EIPFLYASSAATYGGRTSDFIESR    | 107 | 24 | 5 | 20.18 | b9y3y5y7°y7           | 2638.28 | 41.689  | 7427  | 4 | 660.33  | 2.13   |
| P67912 HLDD_SALTY ADP-L-glycero-D-manno-heptose-6-epimerase  | 10 |                 | DGTKFVNVLVDLNIADYMDK        | 34  | 19 | 3 | 24.67 | y3y10y11              | 2171.09 | 63.693  | 5402  | 3 | 724.37  | 9.56   |
| P67912 HLDD_SALTY ADP-L-glycero-D-manno-heptose-6-epimerase  | 11 | Oxidation+M(13) | FVNLVDLNIADYMDK             | 38  | 15 | 3 | 18.81 | b3b12y10              | 1785.87 | 97.941  | 5442  | 3 | 595.96  | -1.44  |
| P67912 HLDD_SALTY ADP-L-glycero-D-manno-heptose-6-epimerase  | 12 | Oxidation+M(10) | TVAEGVTEYMAWLNLR            | 293 | 15 | 3 | 24.83 | b6y5y6                | 1755.81 | 105.021 | 4481  | 2 | 878.41  | -14.81 |
| P58663 RCSB_SALTY Capsular synthesis regulator component B   | 1  |                 | LDHAVLITDLSPGDK             | 47  | 16 | 4 | 17.8  | b5y3y14y16            | 1724.87 | 90.569  | 14829 | 3 | 575.63  | -11.11 |
| P58663 RCSB_SALTY Capsular synthesis regulator component B   | 2  |                 | LGVENDIALLNLYSSVTLSPTDKE    | 192 | 24 | 8 | 54.47 | b2b4b12°b12y5y6y7y8   | 2591.34 | 109.770 | 10740 | 2 | 1296.17 | -1.04  |

|                                                                                |   |                       |                                                    |     |    |    |       |                               |         |         |       |   |         |        |
|--------------------------------------------------------------------------------|---|-----------------------|----------------------------------------------------|-----|----|----|-------|-------------------------------|---------|---------|-------|---|---------|--------|
| [P58663]RCSB_SALTY Capsular synthesis regulator component B                    | 3 |                       | LSPK                                               | 150 | 4  | 2  | 13.16 | b3°b3                         | 444.28  | 104.336 | 2682  | 1 | 444.28  | -12.91 |
| [P58663]RCSB_SALTY Capsular synthesis regulator component B                    | 4 |                       | SAMMKLGVENDIALLNYLSSVTL SPTDK                      | 187 | 28 | 8  | 31.67 | b9°b9b10°b10y3y9°y9y13        | 3010.54 | 114.931 | 21272 | 3 | 1004.19 | -1.22  |
| [P58663]RCSB_SALTY Capsular synthesis regulator component B                    | 5 |                       | LGVENDIALLNYLSSVTLSPDKE                            | 192 | 24 | 5  | 24.65 | b3b8y6y10y13                  | 2591.32 | 85.870  | 3605  | 2 | 1296.16 | -11.31 |
| [P58663]RCSB_SALTY Capsular synthesis regulator component B                    | 6 | Phosphoryl STY(17)    | LGVENDIALLNYLSSVTLSPDKE                            | 192 | 24 | 4  | 29.04 | y6y9y11y12                    | 2671.28 | 63.869  | 3437  | 4 | 668.58  | -8.23  |
| [P58663]RCSB_SALTY Capsular synthesis regulator component B                    | 7 | Oxidation+M(12)       | LDAHVLITDLSMPGDK                                   | 47  | 16 | 3  | 26.17 | b3b4b14                       | 1740.86 | 59.700  | 5293  | 3 | 580.96  | -12.83 |
| [P66869]SUCC_SALTY Succinyl-CoA ligase [ADP-forming] subunit beta              | 1 | Carbamidomethyl+C(11) | YGLPAPVGYACTTPR                                    | 14  | 15 | 3  | 26.89 | y8y10y12                      | 1622.81 | 62.280  | 17146 | 2 | 811.91  | 4.14   |
| [P66869]SUCC_SALTY Succinyl-CoA ligase [ADP-forming] subunit beta              | 2 |                       | VALDPLTGPMPLYQGR                                   | 146 | 15 | 6  | 30.42 | b13y5y11y13°y13*y13           | 1614.84 | 71.722  | 16972 | 2 | 807.92  | 6.88   |
| [P66869]SUCC_SALTY Succinyl-CoA ligase [ADP-forming] subunit beta              | 3 |                       | LVTYQTDANGQPVNQILVEAATDI GKELYLGAVVDR              | 80  | 36 | 13 | 65.89 | b2b7b8°b8b9y1y2y3y5y6y7y25y36 | 3874.05 | 122.028 | 13832 | 3 | 1292.02 | 5.80   |
| [P66869]SUCC_SALTY Succinyl-CoA ligase [ADP-forming] subunit beta              | 4 |                       | AFAENWLGR                                          | 70  | 10 | 5  | 53.01 | b1y3y6y7y8                    | 1191.61 | 58.448  | 3518  | 3 | 397.88  | -11.17 |
| [P66869]SUCC_SALTY Succinyl-CoA ligase [ADP-forming] subunit beta              | 5 |                       | IFMGLATIFLER                                       | 179 | 12 | 3  | 23.03 | b3y3y10                       | 1410.78 | 109.269 | 12421 | 2 | 705.89  | -3.03  |
| [P66869]SUCC_SALTY Succinyl-CoA ligase [ADP-forming] subunit beta              | 6 | Carbamidomethyl+C(20) | EAQAAQWELNYVALDGNIGCMV NGAGLAMGTMDIVK              | 241 | 36 | 4  | 10.98 | b5y7°y7y11                    | 3810.84 | 125.612 | 5300  | 5 | 762.97  | 10.38  |
| [P66869]SUCC_SALTY Succinyl-CoA ligase [ADP-forming] subunit beta              | 7 | Carbamidomethyl+C(6)  | QGDLICLDGKLGADGNALFR                               | 205 | 20 | 3  | 14.9  | b6y9y13                       | 2133.06 | 101.123 | 2006  | 3 | 711.69  | -8.36  |
| [P69936]YDFG_SALTY NADP-dependent L-serine/L-allo-threonine dehydrogenase ydfG | 1 |                       | GHIINIGSTAGSWPYAGGNVYGAT K                         | 126 | 25 | 4  | 19.02 | y7y9y11°y11                   | 2491.25 | 65.281  | 56147 | 4 | 623.57  | 6.86   |
| [P69936]YDFG_SALTY NADP-dependent L-serine/L-allo-threonine dehydrogenase ydfG | 2 |                       | AVLPGMVER                                          | 115 | 9  | 3  | 39.1  | y4y6y7                        | 971.53  | 53.634  | 28484 | 2 | 486.27  | -7.66  |
| [P69936]YDFG_SALTY NADP-dependent L-serine/L-allo-threonine dehydrogenase ydfG | 3 |                       | AAIEEMMASLPAQWR                                    | 58  | 15 | 4  | 26.78 | b5b11y5y10                    | 1703.85 | 91.114  | 14110 | 2 | 852.43  | 14.62  |
| [P69936]YDFG_SALTY NADP-dependent L-serine/L-allo-threonine dehydrogenase ydfG | 4 |                       | TYENTTALTPEDITEAVWWVATL PAHVNINTVEMMPVTQSFAGLSV HR | 199 | 48 | 7  | 38.61 | b2b8b9b13°b13b14y9            | 5340.63 | 136.531 | 7058  | 4 | 1335.91 | -0.09  |
| [P69936]YDFG_SALTY NADP-dependent L-serine/L-allo-threonine dehydrogenase ydfG | 5 |                       | VTDIEPGLVGGTEFSSVR                                 | 171 | 18 | 6  | 16.16 | b6°b6b14°b14y7°y7             | 1862.96 | 101.256 | 4093  | 2 | 931.98  | 6.55   |
| [P69936]YDFG_SALTY NADP-dependent L-serine/L-allo-threonine dehydrogenase ydfG | 6 |                       | LQALK                                              | 36  | 5  | 2  | 27.07 | b3y4                          | 572.37  | 47.620  | 33135 | 1 | 572.37  | -14.40 |
| [P69936]YDFG_SALTY NADP-dependent L-serine/L-allo-threonine dehydrogenase ydfG | 7 |                       | TDLHGTAVR                                          | 162 | 9  | 3  | 39.1  | b3b7b8                        | 969.53  | 60.239  | 2265  | 2 | 485.27  | 15.93  |
| [P69936]YDFG_SALTY NADP-dependent L-serine/L-allo-threonine dehydrogenase ydfG | 8 |                       | NRGHIINIGSTAGSWPYAGGNVYG ATK                       | 124 | 27 | 5  | 12.24 | b4b13*b13y12*y12              | 2761.37 | 63.860  | 3720  | 4 | 691.10  | -3.71  |
| [P69936]YDFG_SALTY NADP-dependent L-serine/L-allo-threonine dehydrogenase ydfG | 9 |                       | DELGENVLTAQLDVRNR                                  | 41  | 17 | 5  | 40.08 | b4b9b10°b10b11                | 1941.98 | 102.734 | 3570  | 2 | 971.49  | -10.94 |

|                                                                                |    |                                                      |                                       |     |    |   |       |                            |         |         |        |   |         |        |
|--------------------------------------------------------------------------------|----|------------------------------------------------------|---------------------------------------|-----|----|---|-------|----------------------------|---------|---------|--------|---|---------|--------|
| [P69936]YDFG_SALTY NADP-dependent L-serine/L-allo-threonine dehydrogenase ydfG | 10 | Phosphoryl STY(12)                                   | GHIINIGSTAGSWPYAGGNVYGATK             | 126 | 25 | 4 | 12.8  | b12_H3PO4<br>b12y11°y11y13 | 2571.17 | 102.124 | 5718   | 4 | 643.55  | -10.63 |
| [P69936]YDFG_SALTY NADP-dependent L-serine/L-allo-threonine dehydrogenase ydfG | 11 | Carbamidomethyl+C(15)<br>;Phosphoryl STY(6)          | MIVLVTGATAGFGECIAR                    | 0   | 18 | 3 | 16.16 | b7b9y11                    | 1945.90 | 72.572  | 1740   | 2 | 973.46  | -7.72  |
| [P69936]YDFG_SALTY NADP-dependent L-serine/L-allo-threonine dehydrogenase ydfG | 12 | Oxidation+M(9)                                       | ASVEDWETMIDTNNK                       | 93  | 15 | 5 | 32.8  | b3b4°b4y4y6                | 1768.75 | 32.152  | 10636  | 4 | 442.94  | -10.63 |
| [P69936]YDFG_SALTY NADP-dependent L-serine/L-allo-threonine dehydrogenase ydfG | 13 | Carbamidomethyl+C(15)<br>;Oxidation+M(1)             | MIVLVTGATAGFGECIAR                    | 0   | 18 | 4 | 27.48 | b3y6y7y14                  | 1881.94 | 82.376  | 3351   | 2 | 941.47  | -9.86  |
| [P69936]YDFG_SALTY NADP-dependent L-serine/L-allo-threonine dehydrogenase ydfG | 14 |                                                      | LPGMVER                               | 117 | 7  | 0 | 1.51  |                            | 801.42  | 53.631  | 3056   | 2 | 401.21  | -13.33 |
| [P0AA19]OMPR_SALTY Transcriptional regulatory protein ompR                     | 1  | Carbamidomethyl+C(25)                                | LLTRESFHLMVLDLMLPGEDGLSICR            | 42  | 26 | 4 | 23.17 | b2y6y8y9                   | 3015.51 | 108.067 | 5089   | 4 | 754.63  | -12.39 |
| [P0AA19]OMPR_SALTY Transcriptional regulatory protein ompR                     | 2  |                                                      | SVANAEQMDR                            | 32  | 10 | 8 | 59.55 | b2b5°b5y4y5y6y8y10         | 1120.51 | 28.254  | 4460   | 2 | 560.76  | 0.76   |
| [P0AA19]OMPR_SALTY Transcriptional regulatory protein ompR                     | 3  |                                                      | ELLAR                                 | 110 | 5  | 3 | 40.6  | b3b4y3                     | 601.36  | 29.025  | 60558  | 1 | 601.36  | -10.76 |
| [P0AA19]OMPR_SALTY Transcriptional regulatory protein ompR                     | 4  |                                                      | YIQTVWGLGYVFVPDGSK                    | 220 | 18 | 9 | 64.83 | b9b10°b10y5y6y7y11°y11y14  | 2029.01 | 109.889 | 6725   | 3 | 677.01  | -14.38 |
| [P0AA19]OMPR_SALTY Transcriptional regulatory protein ompR                     | 5  |                                                      | EPLSR                                 | 177 | 5  | 1 | 13.53 | y4                         | 601.34  | 62.711  | 3297   | 1 | 601.34  | 13.70  |
| [P0AA19]OMPR_SALTY Transcriptional regulatory protein ompR                     | 6  |                                                      | LNLGTR                                | 144 | 6  | 1 | 13.91 | y5                         | 673.39  | 44.353  | 2601   | 2 | 337.20  | -13.32 |
| [P0AA19]OMPR_SALTY Transcriptional regulatory protein ompR                     | 7  |                                                      | SVANAEQMDRLLTR                        | 32  | 14 | 4 | 19.98 | b5y9°y9y13                 | 1603.82 | 63.270  | 2650   | 2 | 802.41  | -1.22  |
| [P0AA19]OMPR_SALTY Transcriptional regulatory protein ompR                     | 8  |                                                      | RQANELPGAPSQEEAVIAFGK                 | 121 | 21 | 5 | 19.74 | b5°b5b9y3y13               | 2212.11 | 69.763  | 1802   | 3 | 738.04  | -11.37 |
| [P0AA19]OMPR_SALTY Transcriptional regulatory protein ompR                     | 9  | Phosphoryl STY(5)                                    | LNLGTREMFREDEPMPLTSGEFAVLK            | 144 | 26 | 5 | 23.17 | b3*b3b4*b4b10_H3PO4<br>b10 | 3060.46 | 114.934 | 4745   | 4 | 765.87  | 4.55   |
| [P0AA19]OMPR_SALTY Transcriptional regulatory protein ompR                     | 10 | Carbamidomethyl+C(25)<br>;Oxidation+M(10)            | LLTRESFHLMVLDLMLPGEDGLSICR            | 42  | 26 | 6 | 37.23 | b8b9y6°y6y11y12            | 3031.56 | 133.419 | 100366 | 3 | 1011.19 | 5.88   |
| [P0AA19]OMPR_SALTY Transcriptional regulatory protein ompR                     | 11 | Carbamidomethyl+C(21)<br>;Oxidation+M()              | ESFHLMVLDLMLPGEDGLSICR                | 46  | 22 | 4 | 13.91 | b3b7y4°y4                  | 2548.19 | 72.887  | 2703   | 4 | 637.80  | -12.07 |
| [P0A1V6]KPRS_SALTY Ribose-phohate pyrophohokinase                              | 1  | Carbamidomethyl+C(18)<br>;Carbamidomethyl+C(32)<br>) | ANVSQVMHHIGDVAGRDCVLVDD<br>MIDTGGTLCK | 198 | 33 | 8 | 27.91 | b2b8b17y2y3y6y8y9          | 3559.70 | 105.971 | 26558  | 4 | 890.68  | -1.58  |
| [P0A1V6]KPRS_SALTY Ribose-phohate pyrophohokinase                              | 2  |                                                      | LFAGNATPELAQR                         | 5   | 13 | 7 | 33.35 | b1b8y6y10y11*y11y13        | 1387.73 | 54.641  | 22287  | 2 | 694.37  | 0.79   |
| [P0A1V6]KPRS_SALTY Ribose-phohate pyrophohokinase                              | 3  |                                                      | ITAVIPYFGYAR                          | 84  | 12 | 3 | 27.01 | b4y6y7                     | 1370.75 | 81.231  | 17457  | 2 | 685.88  | 0.89   |
| [P0A1V6]KPRS_SALTY Ribose-phohate pyrophohokinase                              | 4  |                                                      | LYTSLGDAAVGR                          | 22  | 12 | 5 | 38.32 | b6y5y7y10y12               | 1222.63 | 53.153  | 16726  | 2 | 611.82  | -6.29  |
| [P0A1V6]KPRS_SALTY Ribose-phohate pyrophohokinase                              | 5  |                                                      | VFAYATHPIFSGNAANNLR                   | 243 | 19 | 5 | 29.35 | b16b17y8y12°y12            | 2063.03 | 65.876  | 14892  | 3 | 688.35  | -8.40  |

|                                                             |    |                                                                    |                                     |     |    |    |        |                                             |         |         |       |   |         |        |
|-------------------------------------------------------------|----|--------------------------------------------------------------------|-------------------------------------|-----|----|----|--------|---------------------------------------------|---------|---------|-------|---|---------|--------|
| P0A1V6 KPRS_SALTY Ribose-phohate pyrophohokinase            | 6  |                                                                    | AAEALK                              | 231 | 6  | 3  | 27.44  | b4°b4y5                                     | 602.35  | 31.992  | 15617 | 1 | 602.35  | -8.21  |
| P0A1V6 KPRS_SALTY Ribose-phohate pyrophohokinase            | 7  | Carbamidomethyl+C(10)                                              | NSVIDEVVVCDTIPLTDEIK                | 262 | 20 | 4  | 26.09  | b8b9b15y7                                   | 2259.16 | 88.937  | 5624  | 2 | 1130.09 | 9.40   |
| P0A1V6 KPRS_SALTY Ribose-phohate pyrophohokinase            | 8  |                                                                    | LLNDTDMAIIDK                        | 182 | 12 | 3  | 27.01  | b7b8y8                                      | 1361.69 | 34.925  | 2281  | 2 | 681.35  | -7.80  |
| P0A1V6 KPRS_SALTY Ribose-phohate pyrophohokinase            | 9  | Carbamidomethyl+C(11)                                              | GGDIFIQSTCAPTNDNLMELVVMVDALR        | 49  | 29 | 3  | 22.22  | b10b11y6                                    | 3192.60 | 121.794 | 1737  | 4 | 798.91  | 7.95   |
| P0A1V6 KPRS_SALTY Ribose-phohate pyrophohokinase            | 10 |                                                                    | ASAGRITAVIPYFGYAR                   | 79  | 17 | 3  | 16.93  | b6y3y10                                     | 1812.95 | 85.081  | 10458 | 2 | 906.98  | -14.48 |
| P0A1V6 KPRS_SALTY Ribose-phohate pyrophohokinase            | 11 |                                                                    | LYTSLGDAAVGRFSDGEVSVQINE NVR        | 22  | 27 | 5  | 23.2   | b4b7°b7b8y5                                 | 2896.41 | 60.809  | 4055  | 5 | 580.09  | -12.64 |
| P0A1V6 KPRS_SALTY Ribose-phohate pyrophohokinase            | 12 |                                                                    | MPDMKLFAGNATPELAQR                  | 0   | 18 | 4  | 16.16  | b5b15°b15y10                                | 1989.99 | 97.890  | 1738  | 3 | 664.00  | -0.49  |
| P0A1V6 KPRS_SALTY Ribose-phohate pyrophohokinase            | 13 | Phosphoryl STY(11)                                                 | VFAYATHPIFSGNAANNLR                 | 243 | 19 | 3  | 15.49  | b8b10y7                                     | 2143.00 | 58.017  | 4984  | 4 | 536.50  | -3.08  |
| P0A1V6 KPRS_SALTY Ribose-phohate pyrophohokinase            | 14 | Carbamidomethyl+C(18)<br>;Carbamidomethyl+C(32)<br>;Oxidation+M(7) | ANVSQVMHIIGDVAGRDCVLVDD MIDTGGTLCCK | 198 | 33 | 7  | 22.72  | b6b8°b8b11*b11b13y9                         | 3575.73 | 110.748 | 2422  | 4 | 894.69  | 8.40   |
| P0A1V6 KPRS_SALTY Ribose-phohate pyrophohokinase            | 15 |                                                                    | FSGNAANNLR                          | 252 | 10 | 0  | 5.27   |                                             | 1063.52 | 65.824  | 12597 | 2 | 532.26  | -5.05  |
| P66692 RPIA_SALTY Ribose-5-phohate isomerase A              | 1  |                                                                    | AVGWAALQYVQPGTIVGVGTGSTAAHFIDALGTMK | 8   | 35 | 17 | 124.53 | b3b4b5b6b7b9b11b17y6y9y17y20y24y25y26y28y35 | 3487.82 | 108.158 | 52425 | 3 | 1163.28 | 5.53   |
| P66692 RPIA_SALTY Ribose-5-phohate isomerase A              | 2  | Carbamidomethyl+C(3)                                               | FICIADASK                           | 112 | 9  | 5  | 39.1   | y4°y4y5y7y9                                 | 1024.51 | 51.730  | 32564 | 2 | 512.76  | -3.81  |
| P66692 RPIA_SALTY Ribose-5-phohate isomerase A              | 3  |                                                                    | GADVALIGTPDGVK                      | 201 | 14 | 6  | 34.02  | b5b6y2y3y7y14                               | 1312.69 | 58.165  | 26553 | 2 | 656.85  | -13.02 |
| P66692 RPIA_SALTY Ribose-5-phohate isomerase A              | 4  |                                                                    | LGGRPEYR                            | 149 | 8  | 6  | 49.24  | b6b7y2y3y4y8                                | 947.50  | 24.372  | 5577  | 2 | 474.25  | -8.25  |
| P66692 RPIA_SALTY Ribose-5-phohate isomerase A              | 5  |                                                                    | GQIEGAVSSSDASTEK                    | 43  | 16 | 5  | 36.04  | b4b10y6y9y13                                | 1565.73 | 32.361  | 3519  | 2 | 783.37  | 3.43   |
| P66692 RPIA_SALTY Ribose-5-phohate isomerase A              | 6  |                                                                    | QVDILGKFPLPVEVIPMAR                 | 121 | 19 | 3  | 24.67  | y6y7y9                                      | 2122.19 | 100.571 | 34417 | 3 | 708.07  | -7.36  |
| P66692 RPIA_SALTY Ribose-5-phohate isomerase A              | 7  |                                                                    | GGRPEYR                             | 150 | 7  | 2  | 28.2   | b3b5                                        | 834.41  | 24.379  | 14963 | 2 | 417.71  | -13.17 |
| P66692 RPIA_SALTY Ribose-5-phohate isomerase A              | 8  |                                                                    | VGVGTGSTAAHFIDALGTMK                | 23  | 20 | 1  | 10.06  | b14                                         | 1932.97 | 108.163 | 1613  | 2 | 966.99  | -6.57  |
| P0A7Z7 RPOA_SALTY DNA-directed RNA polymerase subunit alpha | 1  |                                                                    | SLTEIKDVLASR                        | 298 | 12 | 6  | 45.98  | y1y3y5y6y7y12                               | 1331.74 | 63.678  | 76143 | 2 | 666.37  | -9.72  |
| P0A7Z7 RPOA_SALTY DNA-directed RNA polymerase subunit alpha | 2  |                                                                    | MQGSVTEFLKPR                        | 0   | 12 | 5  | 56.77  | b3b7b9b11y12                                | 1392.75 | 76.998  | 31031 | 2 | 696.88  | 14.29  |
| P0A7Z7 RPOA_SALTY DNA-directed RNA polymerase subunit alpha | 3  | Carbamidomethyl+C(6)                                               | LLVDACYSPVER                        | 170 | 12 | 10 | 96.14  | b2b6b8y4y5y7y8y9y10y12                      | 1421.71 | 60.129  | 27541 | 2 | 711.36  | 1.97   |
| P0A7Z7 RPOA_SALTY DNA-directed RNA polymerase subunit alpha | 4  | Carbamidomethyl+C(9)                                               | ILLSSMPGCAVTEVEIDGVLHEYS TK         | 45  | 26 | 3  | 12.5   | b12y20y23                                   | 2848.42 | 91.534  | 20490 | 3 | 950.15  | 3.51   |
| P0A7Z7 RPOA_SALTY DNA-directed RNA polymerase subunit alpha | 5  |                                                                    | EGVQEDILEILLNLK                     | 71  | 15 | 7  | 45.2   | b5y2y3y4y5y7y15                             | 1725.97 | 122.678 | 12764 | 2 | 863.49  | 2.83   |
| P0A7Z7 RPOA_SALTY DNA-directed RNA polymerase subunit alpha | 6  |                                                                    | LVIEMETNGTIDPEEAIR                  | 200 | 18 | 6  | 25.72  | b13°b13y5y8y10°y10                          | 2030.04 | 84.164  | 11008 | 3 | 677.35  | 12.57  |

|                                                             |    |                       |                                     |     |    |    |       |                                |         |         |        |   |         |        |
|-------------------------------------------------------------|----|-----------------------|-------------------------------------|-----|----|----|-------|--------------------------------|---------|---------|--------|---|---------|--------|
| P0A7Z7 RPOA_SALTY DNA-directed RNA polymerase subunit alpha | 7  |                       | QPEVKEEKPEFDPILLRPVDDLELTVR         | 238 | 27 | 7  | 18.32 | b2*b2b4°b4b7b9y27              | 3204.71 | 114.347 | 7494   | 3 | 1068.91 | -0.91  |
| P0A7Z7 RPOA_SALTY DNA-directed RNA polymerase subunit alpha | 8  |                       | LVIEMETNGTIDPEEAIRR                 | 200 | 19 | 5  | 26.74 | b10b13b14y11°y11               | 2186.10 | 108.453 | 2970   | 3 | 729.37  | -3.57  |
| P0A7Z7 RPOA_SALTY DNA-directed RNA polymerase subunit alpha | 9  |                       | VTLEPLER                            | 25  | 8  | 5  | 41.73 | y4°y4y5°y5y6                   | 956.53  | 52.758  | 36045  | 2 | 478.77  | -12.70 |
| P0A7Z7 RPOA_SALTY DNA-directed RNA polymerase subunit alpha | 10 |                       | IHSEEDERPIGR                        | 158 | 12 | 3  | 30.23 | y3y4y6                         | 1437.69 | 25.307  | 27803  | 3 | 479.90  | -15.62 |
| P0A7Z7 RPOA_SALTY DNA-directed RNA polymerase subunit alpha | 11 |                       | QPEVK                               | 238 | 5  | 2  | 13.53 | b3°b3                          | 600.34  | 31.613  | 14377  | 1 | 600.34  | 5.59   |
| P0A7Z7 RPOA_SALTY DNA-directed RNA polymerase subunit alpha | 12 |                       | IAYNVEAAR                           | 182 | 9  | 3  | 31.32 | b4b6y3                         | 1006.53 | 43.340  | 7606   | 2 | 503.77  | 3.27   |
| P0A7Z7 RPOA_SALTY DNA-directed RNA polymerase subunit alpha | 13 |                       | EEKPEFDPILLRPVDDLELTVR              | 243 | 22 | 4  | 13.91 | b7b10y11°y11                   | 2623.40 | 91.007  | 5420   | 4 | 656.61  | 0.93   |
| P0A7Z7 RPOA_SALTY DNA-directed RNA polymerase subunit alpha | 14 |                       | AEAHYIGDLVQR                        | 271 | 13 | 4  | 21.36 | b9y4y6°y6                      | 1484.80 | 43.235  | 2837   | 3 | 495.61  | 12.17  |
| P0A7Z7 RPOA_SALTY DNA-directed RNA polymerase subunit alpha | 15 | Carbamidomethyl+C(10) | RILLSSMPGCAVTEVEIDGVLHEYSTK         | 44  | 27 | 10 | 61.13 | b12°b12b14b16y7y8y12°y12y13y14 | 3004.50 | 114.929 | 122330 | 4 | 751.88  | -4.39  |
| P0A7Z7 RPOA_SALTY DNA-directed RNA polymerase subunit alpha | 16 | Carbamidomethyl+C(4)  | SANCLKAEAIHYIGDLVQR                 | 265 | 19 | 3  | 22.45 | b5b7b14                        | 2158.10 | 77.291  | 29888  | 3 | 720.04  | -4.98  |
| P0A7Z7 RPOA_SALTY DNA-directed RNA polymerase subunit alpha | 17 |                       | IAYNVEAARVEQR                       | 182 | 13 | 3  | 21.36 | b8b10y3                        | 1518.79 | 43.508  | 21229  | 3 | 506.93  | -11.41 |
| P0A7Z7 RPOA_SALTY DNA-directed RNA polymerase subunit alpha | 18 | Carbamidomethyl+C(18) | IHSEEDERPIGRLLVDACYSPPER            | 158 | 24 | 3  | 22.42 | b10y12y13                      | 2840.39 | 62.064  | 12661  | 4 | 710.85  | -3.35  |
| P0A7Z7 RPOA_SALTY DNA-directed RNA polymerase subunit alpha | 19 |                       | GYVPASTRIHSEEDERPIGR                | 150 | 20 | 3  | 14.9  | b5y5y15                        | 2269.14 | 69.213  | 8415   | 3 | 757.05  | 1.61   |
| P0A7Z7 RPOA_SALTY DNA-directed RNA polymerase subunit alpha | 20 |                       | GLSLGMRLNWPPASIADE                  | 310 | 19 | 4  | 15.49 | b9°b9y3y5                      | 2056.01 | 50.687  | 6725   | 3 | 686.01  | -4.87  |
| P0A7Z7 RPOA_SALTY DNA-directed RNA polymerase subunit alpha | 21 |                       | GRGYVPASTR                          | 148 | 10 | 4  | 29.47 | b4b5y5°y5                      | 1063.56 | 24.919  | 4401   | 2 | 532.28  | -1.72  |
| P0A7Z7 RPOA_SALTY DNA-directed RNA polymerase subunit alpha | 22 | Oxidation+M(5)        | LVIEMETNGTIDPEEAIR                  | 200 | 18 | 3  | 16.16 | b6y7y10                        | 2046.03 | 79.848  | 3734   | 4 | 512.26  | 10.62  |
| P0A7Z7 RPOA_SALTY DNA-directed RNA polymerase subunit alpha | 23 |                       | TEIKDVLASR                          | 300 | 10 | 1  | 7.72  | b3                             | 1131.63 | 63.730  | 21051  | 2 | 566.32  | -3.34  |
| O68883 CISY_SALTY Citrate synthase                          | 1  | Carbamidomethyl+C(12) | TAGSSGANPFACIAAGIASLWGPAHGGANEAAALK | 240 | 34 | 5  | 13.51 | b6b16y17y26y34                 | 3195.58 | 116.909 | 22808  | 3 | 1065.86 | 4.05   |
| O68883 CISY_SALTY Citrate synthase                          | 2  |                       | ILILHADHEQNASTSTVR                  | 222 | 18 | 6  | 16.16 | b2b3y2y5y9y18                  | 2005.03 | 44.490  | 18416  | 3 | 669.01  | -9.56  |
| O68883 CISY_SALTY Citrate synthase                          | 3  |                       | TVGWIAHWNEMHTDGMK                   | 388 | 17 | 10 | 54.45 | b8°b8b10b12b13y1y2y5y7y12      | 2012.90 | 67.158  | 17268  | 3 | 671.64  | -7.58  |
| O68883 CISY_SALTY Citrate synthase                          | 4  | Carbamidomethyl+C(9)  | DSHPMAVMCGITGALAAFYHDSL DVNNPR      | 127 | 29 | 7  | 42.6  | y4y6y8y11y13y14y29             | 3159.45 | 109.015 | 11729  | 4 | 790.62  | 2.47   |

|                                                                |    |                       |                                        |     |    |    |       |                                     |         |         |        |   |         |        |
|----------------------------------------------------------------|----|-----------------------|----------------------------------------|-----|----|----|-------|-------------------------------------|---------|---------|--------|---|---------|--------|
| O68883 CISY_SALTY Citrate synthase                             | 5  |                       | AMGIPSSMFTVIFAMAR                      | 371 | 17 | 5  | 35.24 | b7b12y3y4y13                        | 1829.93 | 120.158 | 6899   | 2 | 915.47  | 9.14   |
| O68883 CISY_SALTY Citrate synthase                             | 6  | Carbamidomethyl+C(18) | NDLSYAGNFLNMMFSTPCETYEYV<br>NPVLER     | 189 | 29 | 6  | 25.53 | b1b3b12y2y13y14                     | 3411.57 | 112.010 | 6806   | 3 | 1137.86 | 10.09  |
| O68883 CISY_SALTY Citrate synthase                             | 7  |                       | ELGTKDDLLLEVAMELEHIALNDP<br>YFIEK      | 328 | 28 | 6  | 40.01 | y8°y8y9y13°y13y14                   | 3245.62 | 105.352 | 2434   | 4 | 812.16  | -2.03  |
| O68883 CISY_SALTY Citrate synthase                             | 8  |                       | YSIGQPFVYPR                            | 178 | 11 | 3  | 25.08 | b4y3y6                              | 1326.69 | 69.276  | 17342  | 2 | 663.85  | 1.75   |
| O68883 CISY_SALTY Citrate synthase                             | 9  |                       | LMGFGHR                                | 300 | 7  | 3  | 38.34 | b5b6y4                              | 817.43  | 28.785  | 2837   | 2 | 409.22  | 20.46  |
| O68883 CISY_SALTY Citrate synthase                             | 10 |                       | LYPNVDFYSGIILK                         | 357 | 14 | 5  | 32.54 | b4b8b12y11°y11                      | 1641.86 | 63.901  | 1571   | 2 | 821.43  | -17.99 |
| O68883 CISY_SALTY Citrate synthase                             | 11 |                       | TTVTRHTMIHEQITR                        | 105 | 15 | 3  | 18.81 | b14y9y12                            | 1823.96 | 100.248 | 203391 | 2 | 912.48  | 2.01   |
| O68883 CISY_SALTY Citrate synthase                             | 12 | Carbamidomethyl+C(10) | RDSHPMAVMCGITGALAAFYHDS<br>LDVNNPR     | 126 | 30 | 4  | 17.54 | b6b12b14°b14                        | 3315.59 | 103.432 | 22263  | 4 | 829.65  | 12.59  |
| O68883 CISY_SALTY Citrate synthase                             | 13 |                       | TVGWIAHWNEMHTDGMKIARPR                 | 388 | 22 | 3  | 13.91 | b9b11y3                             | 2606.27 | 136.435 | 11347  | 3 | 869.43  | -5.81  |
| O68883 CISY_SALTY Citrate synthase                             | 14 |                       | ELGTKDDLLEVAMELEHIALNDP<br>YFIEK       | 328 | 28 | 6  | 40.43 | b3b9b10b11y7y10                     | 3245.67 | 127.604 | 2354   | 3 | 1082.56 | 12.49  |
| O68883 CISY_SALTY Citrate synthase                             | 15 | Carbamidomethyl+C(3)  | ETCHEVLKELGTK                          | 320 | 13 | 4  | 28.84 | b8°b8b9b11                          | 1543.80 | 102.785 | 2097   | 2 | 772.40  | 14.87  |
| P0A1U6 YJGD_SALTY Uncharacterized<br>protein yjgD              | 1  |                       | LIIEELLEDGSDPDALYTIEHHLSA<br>DDFETLEK  | 15  | 33 | 10 | 32.75 | b2b3b5b12y2y7y12y13y21<br>y33       | 3770.82 | 107.489 | 29538  | 4 | 943.46  | 1.04   |
| P0A1U6 YJGD_SALTY Uncharacterized<br>protein yjgD              | 2  |                       | MANPELEEQREETR                         | 0   | 15 | 8  | 38.39 | b6°b6b10y3°y3y4°y4y11               | 1844.87 | 83.628  | 10478  | 3 | 615.63  | -3.24  |
| P0A1U6 YJGD_SALTY Uncharacterized<br>protein yjgD              | 3  |                       | ANPELEEQREETR                          | 1   | 14 | 6  | 19.98 | b9y2y6°y6y12y14                     | 1713.82 | 40.327  | 8815   | 3 | 571.94  | -14.03 |
| P0A1U6 YJGD_SALTY Uncharacterized<br>protein yjgD              | 4  |                       | MANPELEEQREETR                         | 0   | 15 | 4  | 26.89 | y6°y6y11y12                         | 1844.89 | 98.792  | 10775  | 2 | 922.95  | 5.03   |
| P0A1U6 YJGD_SALTY Uncharacterized<br>protein yjgD              | 5  |                       | PELEEQREETR                            | 3   | 12 | 0  | 3.39  |                                     | 1528.76 | 40.340  | 2151   | 2 | 764.88  | 1.12   |
| Q7CPH8 SECB_SALTY Protein-export<br>protein secB               | 1  |                       | GTFPQLNLAPVNFDAFMNYLQQ<br>QAGEGTEEHQDA | 120 | 35 | 12 | 42.9  | b4b6°b6°*b6b9°b9b15y3y4y<br>8y10y13 | 3893.83 | 116.803 | 14341  | 3 | 1298.62 | 5.96   |
| Q7CPH8 SECB_SALTY Protein-export<br>protein secB               | 2  |                       | LDLDTASSQLADDVYEVVLR                   | 41  | 20 | 7  | 39.93 | b5b6b8y2y3y4y20                     | 2222.15 | 109.853 | 11272  | 2 | 1111.58 | 12.63  |
| Q7CPH8 SECB_SALTY Protein-export<br>protein secB               | 3  |                       | IYTKDVSFEAPNAPHVFQK                    | 15  | 19 | 6  | 29.35 | b13°b13b17°b17y11y12                | 2191.12 | 75.968  | 5030   | 4 | 548.53  | -0.89  |
| Q7CPH8 SECB_SALTY Protein-export<br>protein secB               | 4  |                       | DVSFEAPNAPHVFQK                        | 19  | 15 | 3  | 18.81 | b3y9y11                             | 1685.82 | 61.237  | 2967   | 2 | 843.42  | -2.32  |
| Q7CPH8 SECB_SALTY Protein-export<br>protein secB               | 5  |                       | DWQPEVK                                | 34  | 7  | 3  | 41.35 | b4b6y5                              | 901.45  | 60.130  | 2218   | 2 | 451.23  | 14.63  |
| P15888 NFNB_SALTY Oxygen-insensitive<br>NAD(P)H nitroreductase | 1  |                       | TLLQYSPSSTNSQPWHFIVASTEE<br>GK         | 31  | 26 | 8  | 37.5  | b8°b8b9°*b9b10b14y3y26              | 2907.41 | 105.197 | 26903  | 3 | 969.81  | -3.27  |
| P15888 NFNB_SALTY Oxygen-insensitive<br>NAD(P)H nitroreductase | 2  |                       | MDIVSVALQR                             | 0   | 10 | 4  | 40.46 | b3b6y4y6                            | 1131.61 | 70.180  | 7417   | 2 | 566.31  | -4.64  |
| P15888 NFNB_SALTY Oxygen-insensitive<br>NAD(P)H nitroreductase | 3  |                       | GYTSLVVVPVGHHSVEDFNAGLP<br>K           | 181 | 24 | 8  | 40.97 | b3b5b7b23y2y4y8y16                  | 2522.30 | 71.627  | 4169   | 3 | 841.44  | -1.65  |
| P15888 NFNB_SALTY Oxygen-insensitive<br>NAD(P)H nitroreductase | 4  |                       | FFADMHR                                | 122 | 7  | 3  | 41.35 | b3y3y6                              | 923.42  | 66.129  | 24864  | 1 | 923.42  | 3.64   |
| P15888 NFNB_SALTY Oxygen-insensitive<br>NAD(P)H nitroreductase | 5  |                       | LPLETTLTEV                             | 207 | 10 | 5  | 34.7  | y3°y3y4°y4y9                        | 1115.63 | 46.053  | 1632   | 3 | 372.55  | 13.68  |
| P15888 NFNB_SALTY Oxygen-insensitive<br>NAD(P)H nitroreductase | 6  |                       | SAAGNYTFNERK                           | 62  | 12 | 6  | 41.33 | b3°b3b4b5°*b5y11                    | 1357.65 | 91.066  | 11742  | 2 | 679.33  | -0.45  |
| P15888 NFNB_SALTY Oxygen-insensitive<br>NAD(P)H nitroreductase | 7  |                       | EKGYSLSLVVPVGHHSVEDFNAG<br>LPK         | 179 | 26 | 6  | 16.47 | b6°b6b25y10°*y10y18                 | 2779.41 | 100.194 | 4786   | 4 | 695.61  | -11.95 |
| P15888 NFNB_SALTY Oxygen-insensitive<br>NAD(P)H nitroreductase | 8  |                       | VSLKDDHQWMAK                           | 129 | 12 | 5  | 48.55 | b8b11y3y5y11                        | 1457.73 | 86.596  | 2196   | 2 | 729.37  | 8.71   |

|                                                                      |    |                      |                                     |     |    |    |        |                                         |         |         |        |   |         |        |
|----------------------------------------------------------------------|----|----------------------|-------------------------------------|-----|----|----|--------|-----------------------------------------|---------|---------|--------|---|---------|--------|
| [P53636]SODC1_SALTY Superoxide dismutase [Cu-Zn] 1                   | 1  | Carbamidomethyl+C(3) | FACGVIEK                            | 169 | 8  | 12 | 79.32  | b2b4b5y1y2°y2y3y5°y5y6y7y8              | 923.45  | 41.520  | 139543 | 2 | 462.23  | -12.23 |
| [P53636]SODC1_SALTY Superoxide dismutase [Cu-Zn] 1                   | 2  |                      | EVPALMAGGHLDPEK                     | 84  | 15 | 5  | 30.42  | b14y3y8y9°y9                            | 1563.79 | 58.043  | 19362  | 3 | 521.93  | 1.95   |
| [P53636]SODC1_SALTY Superoxide dismutase [Cu-Zn] 1                   | 3  |                      | GGDNYSDKPAPLGGGGAR                  | 151 | 18 | 15 | 147.87 | b4b7b10°b10°b10y3y5y6y7y8y9y10y11y12y14 | 1688.77 | 33.877  | 82958  | 3 | 563.59  | -17.49 |
| [P53636]SODC1_SALTY Superoxide dismutase [Cu-Zn] 1                   | 4  |                      | GHLGDLPLGLVVNADGTATYPLLA PR         | 110 | 25 | 6  | 37.85  | b3b4b5°b5b16y14                         | 2517.30 | 83.523  | 48444  | 4 | 630.08  | -18.14 |
| [P53636]SODC1_SALTY Superoxide dismutase [Cu-Zn] 1                   | 5  |                      | HLGPYNDKGHGLDPLGLVVNAD GTATYPLLA PR | 102 | 33 | 14 | 85.66  | b3b5b8°b8b10b14b18y3y4y5y6y8y11°y11     | 3441.78 | 81.434  | 133312 | 4 | 861.20  | -3.12  |
| [P53636]SODC1_SALTY Superoxide dismutase [Cu-Zn] 1                   | 6  |                      | DGKEVPALMAGGHLDPEK                  | 81  | 18 | 4  | 25.72  | b11b13b17y7                             | 1863.92 | 68.491  | 16210  | 2 | 932.46  | -2.29  |
| [P53636]SODC1_SALTY Superoxide dismutase [Cu-Zn] 1                   | 7  |                      | PALMAGGHLDPEK                       | 86  | 13 | 1  | 7.3    | b3                                      | 1335.68 | 58.079  | 4181   | 2 | 668.35  | 8.87   |
| [P53636]SODC1_SALTY Superoxide dismutase [Cu-Zn] 1                   | 8  |                      | EVPALMAGGHLDPEK                     | 84  | 15 | 0  | 3.77   |                                         | 1545.76 | 58.039  | 2776   | 3 | 515.92  | -5.53  |
| [P14146]PHOP_SALTY Virulence transcriptional regulatory protein phoP | 1  |                      | SSDVSLPVLVLTAR                      | 68  | 14 | 9  | 53.71  | b1b3°b3b5b8y4y8y10y14                   | 1456.84 | 87.312  | 19597  | 2 | 728.92  | 2.35   |
| [P14146]PHOP_SALTY Virulence transcriptional regulatory protein phoP | 2  |                      | GQGYLFELR                           | 215 | 9  | 5  | 31.32  | b6y1y3y4y9                              | 1082.56 | 72.232  | 15731  | 2 | 541.78  | -1.92  |
| [P14146]PHOP_SALTY Virulence transcriptional regulatory protein phoP | 3  |                      | VLVVEDNALLR                         | 3   | 11 | 7  | 57.38  | b3y6*y6y7°y7y8y9                        | 1240.72 | 68.269  | 15307  | 2 | 620.86  | -6.30  |
| [P14146]PHOP_SALTY Virulence transcriptional regulatory protein phoP | 4  |                      | IQAQYPHDVITTVR                      | 201 | 14 | 5  | 56.29  | y6y8y9y10y12                            | 1640.85 | 52.102  | 20866  | 3 | 547.62  | -15.33 |
| [P14146]PHOP_SALTY Virulence transcriptional regulatory protein phoP | 5  |                      | LTAFEYTIMETLIR                      | 150 | 14 | 5  | 28.58  | b7b12°b12y3y9                           | 1700.91 | 68.414  | 19647  | 2 | 850.96  | 11.12  |
| [P14146]PHOP_SALTY Virulence transcriptional regulatory protein phoP | 6  |                      | ELSVNEEVIK                          | 140 | 10 | 6  | 27.71  | b6b8°b8*b8y8*y8                         | 1159.61 | 52.259  | 6272   | 2 | 580.31  | -9.68  |
| [P14146]PHOP_SALTY Virulence transcriptional regulatory protein phoP | 7  |                      | MQALMR                              | 112 | 6  | 1  | 13.91  | b3                                      | 749.39  | 51.344  | 3818   | 2 | 375.20  | 14.17  |
| [P14146]PHOP_SALTY Virulence transcriptional regulatory protein phoP | 8  |                      | VEVLSSGADDYVTKPFHIEEVMAR            | 88  | 24 | 3  | 13.12  | b13y7y12                                | 2692.37 | 82.655  | 3248   | 4 | 673.85  | 14.33  |
| [P14146]PHOP_SALTY Virulence transcriptional regulatory protein phoP | 9  |                      | EGWQDKVEVLSSGADDYVTKPFHIEEVMAR      | 82  | 30 | 6  | 25.64  | b8b15y6°y6y7y10                         | 3435.64 | 84.301  | 47211  | 4 | 859.67  | -2.91  |
| [P14146]PHOP_SALTY Virulence transcriptional regulatory protein phoP | 10 | Oxidation+M(4)       | DSLMLQLYPDaelRESHTIDVLMGR           | 172 | 25 | 5  | 23.76  | b6b8b11y9y18                            | 2918.40 | 107.172 | 4202   | 3 | 973.47  | -12.88 |
| [P14146]PHOP_SALTY Virulence transcriptional regulatory protein phoP | 11 | Oxidation+M(9)       | LTAFEYTIMETLIR                      | 150 | 14 | 5  | 31.75  | b7b8b11°b11y9                           | 1716.89 | 113.773 | 2085   | 2 | 858.95  | 1.56   |
| [P58661]AAT_SALTY Aartate aminotransferase                           | 1  |                      | ANYSNPPAHGASIVATILSNDALR            | 280 | 24 | 4  | 22.42  | b2b8y6y7                                | 2452.26 | 86.788  | 11542  | 3 | 818.09  | -0.20  |
| [P58661]AAT_SALTY Aartate aminotransferase                           | 2  |                      | MFENITAAPADPILGLADLFR               | 0   | 21 | 11 | 39.02  | b2b4b5°b5°b5b11y2y5y7y13y21             | 2275.20 | 121.188 | 11410  | 2 | 1138.10 | 8.37   |
| [P58661]AAT_SALTY Aartate aminotransferase                           | 3  |                      | QNGMFSFSGLTK                        | 343 | 12 | 3  | 23.03  | b4b6y11                                 | 1316.62 | 73.438  | 3585   | 3 | 439.54  | -8.90  |
| [P58661]AAT_SALTY Aartate aminotransferase                           | 4  |                      | NFGLYNER                            | 246 | 8  | 4  | 52.26  | b6b7y5y7                                | 1012.47 | 96.404  | 3270   | 1 | 1012.47 | -10.73 |



|                                           |    |                       |                                                |     |    |   |       |                         |         |         |       |   |         |        |
|-------------------------------------------|----|-----------------------|------------------------------------------------|-----|----|---|-------|-------------------------|---------|---------|-------|---|---------|--------|
| P58661 AAT_SALTY Aartate aminotransferase | 5  |                       | AEQYLLENETTK                                   | 51  | 12 | 3 | 23.03 | b10y4y6                 | 1438.67 | 73.361  | 3164  | 2 | 719.84  | -22.31 |
| P58661 AAT_SALTY Aartate aminotransferase | 6  | Carbamidomethyl+C(4)  | VGACTLVAADAETVDR                               | 254 | 16 | 4 | 28.62 | b3y3y5y12               | 1647.81 | 55.646  | 3104  | 2 | 824.41  | 5.11   |
| P58661 AAT_SALTY Aartate aminotransferase | 7  | Carbamidomethyl+C(15) | VNVAGMTPDNMAPLCEAIVAVL                         | 374 | 22 | 5 | 18.96 | b10b14y8y14°y14         | 2285.10 | 76.768  | 1844  | 3 | 762.37  | -15.17 |
| P58661 AAT_SALTY Aartate aminotransferase | 8  |                       | AIWEQELTDMR                                    | 304 | 11 | 7 | 49.14 | b3b4b7°b7*b7y3y10       | 1391.66 | 136.528 | 1550  | 1 | 1391.66 | -2.02  |
| P58661 AAT_SALTY Aartate aminotransferase | 9  |                       | INLGIGVYKDETGK                                 | 28  | 14 | 3 | 28.55 | y5y7y13                 | 1506.81 | 44.806  | 4645  | 3 | 502.94  | -7.13  |
| P58661 AAT_SALTY Aartate aminotransferase | 10 |                       | AIWEQELTDMRQR                                  | 304 | 13 | 3 | 21.36 | b5y5y8                  | 1675.83 | 37.743  | 1702  | 4 | 419.71  | 7.36   |
| P58661 AAT_SALTY Aartate aminotransferase | 11 |                       | TAQTPGGTGALRIAADFLAK                           | 96  | 20 | 5 | 38.58 | b10b11°b11b12b15        | 1959.04 | 62.079  | 1540  | 3 | 653.68  | -13.65 |
| P58661 AAT_SALTY Aartate aminotransferase | 12 | Oxidation+M(10)       | AIWEQELTDMR                                    | 304 | 11 | 3 | 25.08 | b4b10y8                 | 1407.66 | 73.667  | 3878  | 2 | 704.34  | 5.46   |
| P11003 METF_SALTY 5                       | 1  | Carbamidomethyl+C(11) | TGLEAAPHLTCIDATRDELRL                          | 80  | 20 | 9 | 31.8  | b5°b5b8b9y1y2y3y17y20   | 2239.11 | 59.769  | 19195 | 3 | 747.04  | -3.60  |
| P11003 METF_SALTY 5                       | 2  |                       | EGVKDFHFYTLNR                                  | 266 | 13 | 4 | 33.35 | b7y6y9y10               | 1625.79 | 61.748  | 13933 | 3 | 542.60  | -8.03  |
| P11003 METF_SALTY 5                       | 3  |                       | LVGANIAMDMVK                                   | 250 | 12 | 4 | 33.24 | y4°y4y7y10              | 1261.65 | 71.666  | 11562 | 2 | 631.33  | -12.67 |
| P11003 METF_SALTY 5                       | 4  |                       | TIARDYWNNGIR                                   | 100 | 12 | 4 | 27.01 | b9b10°b10y9             | 1478.76 | 72.659  | 4487  | 2 | 739.88  | 7.51   |
| P11003 METF_SALTY 5                       | 5  |                       | IPSWMSLMFEGLDNDNAETR                           | 230 | 19 | 7 | 24.52 | b6b9b12y2y10°y10y19     | 2212.03 | 111.544 | 4453  | 2 | 1106.52 | 11.81  |
| P11003 METF_SALTY 5                       | 6  |                       | IPSWMSLMFEGLDNDNAETRK                          | 230 | 20 | 5 | 23.46 | b1b6b8b11y12            | 2340.08 | 81.586  | 4069  | 2 | 1170.54 | -10.22 |
| P11003 METF_SALTY 5                       | 7  |                       | FADMTNVR                                       | 222 | 8  | 4 | 33.95 | b2b4y5y6                | 953.46  | 43.390  | 2711  | 2 | 477.23  | 4.61   |
| P11003 METF_SALTY 5                       | 8  |                       | EVADFDISVAAYPEVHPEAK                           | 140 | 20 | 7 | 48.88 | b3b5b8b11y5y11y17       | 2187.10 | 63.991  | 68455 | 4 | 547.53  | 19.87  |
| P11003 METF_SALTY 5                       | 9  |                       | AITQFFFDVESYLR                                 | 179 | 14 | 4 | 31.75 | b10b11b13y10            | 1735.86 | 72.556  | 9967  | 2 | 868.44  | -3.31  |
| P11003 METF_SALTY 5                       | 10 |                       | FVSVTYGANSGER                                  | 54  | 13 | 7 | 46.88 | b3b7°b7b8b10y7°y7       | 1386.65 | 27.795  | 7661  | 2 | 693.83  | -9.77  |
| P11003 METF_SALTY 5                       | 11 | Carbamidomethyl+C(11) | TGLEAAPHLTCIDATR                               | 80  | 16 | 4 | 25.5  | b4b6°b6b9               | 1725.86 | 90.473  | 1887  | 2 | 863.44  | 2.90   |
| P11003 METF_SALTY 5                       | 12 | Carbamidomethyl+C(8)  | AEMSYAICHTLGVPRGL                              | 279 | 17 | 3 | 16.93 | b3b7y13                 | 1874.95 | 72.607  | 1508  | 2 | 937.98  | 15.69  |
| P11003 METF_SALTY 5                       | 13 |                       | AITQFFFDVESYLRFR                               | 179 | 16 | 3 | 17.8  | b5b9y8                  | 2039.04 | 58.429  | 11233 | 3 | 680.35  | 2.04   |
| P11003 METF_SALTY 5                       | 14 | Carbamidomethyl+C(13) | ERTGLEAAPHLTCIDATR                             | 78  | 18 | 5 | 23.57 | b12°b12y7y8°y8          | 2011.03 | 105.381 | 11068 | 3 | 671.01  | 13.23  |
| P11003 METF_SALTY 5                       | 15 |                       | VDAGANRAITQFFFDVESYLR                          | 172 | 21 | 5 | 14.38 | b3°b3b13°b13y19         | 2419.17 | 67.505  | 9687  | 4 | 605.55  | -14.23 |
| P11003 METF_SALTY 5                       | 16 | Carbamidomethyl+C(1)  | CVSAGIDVEIIPGILPVSNFKQAK                       | 197 | 24 | 4 | 13.12 | b4b11°b11y3             | 2555.39 | 63.952  | 6062  | 3 | 852.47  | 1.62   |
| P11003 METF_SALTY 5                       | 17 | Oxidation+M(12)       | GDLPPGSGKPEMYAADLVGLLKE<br>VADFDISVAAYPEVHPEAK | 118 | 42 | 4 | 10.86 | b4°b4b7y11              | 4412.22 | 113.522 | 3324  | 4 | 1103.81 | 3.65   |
| P11003 METF_SALTY 5                       | 18 | Carbamidomethyl+C(1)  | CIDATRDELRL                                    | 90  | 10 | 0 | 5.65  |                         | 1248.61 | 59.756  | 5843  | 2 | 624.81  | 4.40   |
| P64267 GNS_SALTY Protein gns              | 1  |                       | TGQEVSEIEFAPR                                  | 28  | 13 | 4 | 35.83 | y7y8y9y13               | 1462.73 | 57.902  | 14745 | 2 | 731.87  | 6.26   |
| P64267 GNS_SALTY Protein gns              | 2  |                       | TGQEVSEIEFAPRETMK                              | 28  | 17 | 8 | 62.9  | b10b11b13b14°b14y6y9y14 | 1951.95 | 84.951  | 6856  | 3 | 651.32  | 2.13   |
| P64267 GNS_SALTY Protein gns              | 3  |                       | NSEELTHK                                       | 1   | 8  | 4 | 36.96 | b4b6y7°y7               | 957.48  | 58.951  | 2794  | 2 | 479.24  | 13.00  |
| P64267 GNS_SALTY Protein gns              | 4  |                       | ETMKGLEGYHVK                                   | 41  | 12 | 3 | 27.01 | b6b7y9                  | 1391.71 | 46.740  | 1901  | 2 | 696.36  | 9.12   |
| P64267 GNS_SALTY Protein gns              | 5  |                       | KTGQEVSEIEFAPR                                 | 27  | 14 | 6 | 41.15 | b6b9y5°y5y10y12         | 1590.84 | 117.226 | 1871  | 2 | 795.92  | 14.73  |
| P77983 KPYK1_SALTY Pyruvate kinase I      | 1  |                       | GDLGVEIPVEEVIFAQK                              | 244 | 17 | 8 | 58.71 | b3b5b7°b7b12y3y4y12     | 1843.00 | 95.429  | 28252 | 2 | 922.01  | 10.07  |
| P77983 KPYK1_SALTY Pyruvate kinase I      | 2  | Carbamidomethyl+C(3)  | IVCTIGPK                                       | 5   | 8  | 4 | 36.96 | b3b6y7y8                | 887.51  | 44.184  | 15763 | 2 | 444.26  | 7.50   |
| P77983 KPYK1_SALTY Pyruvate kinase I      | 3  |                       | IENQEGLNNFDEILEASDGIMVAR                       | 220 | 24 | 4 | 22.42 | b3b4°b4y11              | 2677.25 | 113.119 | 7826  | 3 | 893.09  | -8.66  |
| P77983 KPYK1_SALTY Pyruvate kinase I      | 4  |                       | AEAGDVANAILDGTDAVMLSGESAK                      | 292 | 25 | 4 | 19.54 | b7b14b17y9              | 2405.13 | 75.413  | 5084  | 3 | 802.38  | -7.82  |
| P77983 KPYK1_SALTY Pyruvate kinase I      | 5  |                       | MLDAGMNVMR                                     | 22  | 10 | 4 | 29.47 | b5°b5y6y7               | 1137.52 | 68.435  | 5033  | 2 | 569.26  | -0.21  |

|                                            |    |                       |                                                   |     |    |    |       |                                          |         |         |       |   |         |        |
|--------------------------------------------|----|-----------------------|---------------------------------------------------|-----|----|----|-------|------------------------------------------|---------|---------|-------|---|---------|--------|
| P77983 KPYK1_SALTY Pyruvate kinase I       | 6  |                       | VVITATQMLDSMIK                                    | 272 | 14 | 5  | 28.58 | b8b10°b10y7y12                           | 1549.81 | 72.268  | 3435  | 2 | 775.41  | -12.29 |
| P77983 KPYK1_SALTY Pyruvate kinase I       | 7  |                       | AHGGENIQISK                                       | 208 | 12 | 4  | 38.32 | b4b7b11y9                                | 1266.68 | 60.233  | 38897 | 2 | 633.84  | 1.25   |
| P77983 KPYK1_SALTY Pyruvate kinase I       | 8  |                       | AGQTFTFITDK                                       | 86  | 11 | 4  | 28.09 | b8*b8y5y6                                | 1216.57 | 58.937  | 13028 | 3 | 406.19  | -12.64 |
| P77983 KPYK1_SALTY Pyruvate kinase I       | 9  |                       | SVVGNNEIVAVTYEGFTSDLSVG<br>NTVLVDDGLIGMEVTAIEGNIK | 97  | 44 | 12 | 30.48 | b9°b9*b9b10°b10b14y3y7y<br>10°y10*y10y16 | 4526.28 | 97.419  | 10613 | 4 | 1132.33 | 7.66   |
| P77983 KPYK1_SALTY Pyruvate kinase I       | 10 |                       | MMIEK                                             | 261 | 5  | 1  | 13.53 | y3                                       | 651.31  | 44.474  | 7562  | 1 | 651.31  | -10.21 |
| P77983 KPYK1_SALTY Pyruvate kinase I       | 11 |                       | GAVETAEK                                          | 360 | 8  | 4  | 52.26 | b3b6y4y5                                 | 804.42  | 68.459  | 6734  | 1 | 804.42  | 18.06  |
| P77983 KPYK1_SALTY Pyruvate kinase I       | 12 |                       | LEGGNDVSLK                                        | 76  | 10 | 4  | 27.71 | b4°b4b8y7                                | 1031.55 | 41.658  | 1967  | 2 | 516.28  | 12.66  |
| P77983 KPYK1_SALTY Pyruvate kinase I       | 13 | Carbamidomethyl+C(7)  | QDLIFGCEQGVDFVAASFIR                              | 175 | 20 | 4  | 24.32 | b3b4*b4b8                                | 2272.10 | 112.797 | 1538  | 3 | 758.04  | -1.72  |
| P77983 KPYK1_SALTY Pyruvate kinase I       | 14 |                       | GAVETAEKLEAPLIVVATQGGK                            | 360 | 22 | 4  | 13.91 | b6b10°b10y5                              | 2181.19 | 81.371  | 25224 | 3 | 727.74  | -8.17  |
| P77983 KPYK1_SALTY Pyruvate kinase I       | 15 |                       | GDLGVEIPVEEVIFAQKMMIEK                            | 244 | 22 | 4  | 18.96 | b6b11y5y8                                | 2475.29 | 70.238  | 10332 | 3 | 825.77  | -0.59  |
| P77983 KPYK1_SALTY Pyruvate kinase I       | 16 |                       | KYFPDATILALTTNEVTAR                               | 388 | 19 | 3  | 15.49 | b3b6y3                                   | 2124.12 | 83.174  | 9757  | 3 | 708.71  | -4.60  |
| P77983 KPYK1_SALTY Pyruvate kinase I       | 17 | Carbamidomethyl+C(3)  | VICKVLNNGDLGENK                                   | 141 | 15 | 5  | 18.81 | b3y3°y3*y3y12                            | 1672.85 | 26.457  | 6980  | 3 | 558.29  | -11.60 |
| P77983 KPYK1_SALTY Pyruvate kinase I       | 18 | Phosphoryl STY(10)    | LEAPLIVVATQGGK                                    | 368 | 14 | 5  | 19.98 | b4b11°b11*b11y3                          | 1475.78 | 49.712  | 23102 | 2 | 738.40  | 4.88   |
| P77983 KPYK1_SALTY Pyruvate kinase I       | 19 | Phosphoryl STY(6)     | DVALQSGLAQK                                       | 434 | 11 | 4  | 39.41 | b4b10y3y4                                | 1209.57 | 40.801  | 2364  | 2 | 605.29  | -3.63  |
| P77983 KPYK1_SALTY Pyruvate kinase I       | 20 | Oxidation+M(8)        | VVITATQMLDSMIK                                    | 272 | 14 | 3  | 27.76 | y5y12y13                                 | 1565.83 | 63.816  | 8639  | 2 | 783.42  | -1.09  |
| P67551 YAEP_SALTY UPF0253 protein yaeP     | 1  |                       | VLNEVAADSALSESUREK                                | 32  | 18 | 4  | 16.16 | b9°b9b13y15                              | 1916.99 | 79.885  | 2057  | 3 | 639.67  | -3.06  |
| P67551 YAEP_SALTY UPF0253 protein yaeP     | 2  |                       | VLNEVAADSALSESUR                                  | 32  | 16 | 5  | 29.29 | b15°b15y9y10y14                          | 1659.87 | 65.274  | 1833  | 3 | 553.96  | 6.47   |
| P67551 YAEP_SALTY UPF0253 protein yaeP     | 3  |                       | AAAYAAANLLVSDYVNE                                 | 50  | 16 | 3  | 17.8  | b4y3y8                                   | 1683.83 | 106.479 | 1573  | 2 | 842.42  | 1.52   |
| P67551 YAEP_SALTY UPF0253 protein yaeP     | 4  | Carbamidomethyl+C(18) | YAEIASGDLGYVPDALGCVLKVL<br>NEVAADSALSESUR         | 11  | 37 | 3  | 10.93 | b7b11y10                                 | 3851.97 | 114.845 | 19707 | 4 | 963.75  | 7.42   |
| Q8ZP84 UE_SALTY Universal stress protein E | 1  |                       | MAMYQNMLVVIDPNQDDQPALRR                           | 0   | 23 | 6  | 27.28 | b10b12y12°y12y13y23                      | 2718.35 | 94.421  | 52438 | 3 | 906.79  | 11.86  |
| Q8ZP84 UE_SALTY Universal stress protein E | 2  |                       | ALVAVNLAASEPYHNALNEK                              | 155 | 20 | 8  | 47.63 | b2b3b11b16y7y9y10y16                     | 2182.12 | 66.811  | 11830 | 3 | 728.04  | 0.78   |
| Q8ZP84 UE_SALTY Universal stress protein E | 3  |                       | TAWIREQAK                                         | 68  | 9  | 6  | 46.1  | b3°b3b4y4y5y9                            | 1102.60 | 49.629  | 11415 | 2 | 551.80  | 1.66   |
| Q8ZP84 UE_SALTY Universal stress protein E | 4  |                       | AMYQNMLVVIDPNQDDQPALRR                            | 1   | 22 | 5  | 35.24 | y10y11°y11y12*y12                        | 2587.30 | 81.369  | 2723  | 4 | 647.58  | 8.02   |
| Q8ZP84 UE_SALTY Universal stress protein E | 5  |                       | VVWHNRPFETIIEQVIAGSHDLVL<br>K                     | 89  | 25 | 4  | 19.02 | b3b7°b7b10                               | 2870.51 | 110.669 | 22927 | 3 | 957.51  | -20.41 |
| Q8ZP84 UE_SALTY Universal stress protein E | 6  |                       | TGLSAAFLGNTAEQVIDHLR                              | 273 | 20 | 3  | 14.9  | b3y10y16                                 | 2113.06 | 86.378  | 5538  | 3 | 705.02  | -21.72 |
| Q8ZP84 UE_SALTY Universal stress protein E | 7  |                       | AFLPIYDFSYEMTTLLSPDER                             | 36  | 21 | 9  | 56.23 | b7°b7b8b10y3y6°y6y7y8                    | 2508.23 | 85.365  | 5287  | 2 | 1254.62 | 13.24  |
| Q8ZP84 UE_SALTY Universal stress protein E | 8  |                       | DQPWPEGGK                                         | 146 | 9  | 4  | 31.32 | b5b7y8*y8                                | 1013.48 | 55.485  | 2186  | 2 | 507.25  | 15.78  |
| Q8ZP84 UE_SALTY Universal stress protein E | 9  |                       | VVWHNRPFETIIEQVIAGSHDLVL<br>KMAHQHDR              | 89  | 32 | 9  | 43.87 | b3b5b14y3y12y13*y13y14<br>*y14           | 3745.95 | 97.374  | 26283 | 5 | 750.00  | 0.20   |
| Q8ZP84 UE_SALTY Universal stress protein E | 10 |                       | MAHQHDRLEAVIFTPTDWHLLR                            | 114 | 22 | 5  | 22.66 | b8°b8b9°b9y7                             | 2686.35 | 116.084 | 6834  | 3 | 896.12  | -7.63  |

|                                            |    |                      |                                                     |     |    |    |       |                                    |         |         |       |   |         |        |
|--------------------------------------------|----|----------------------|-----------------------------------------------------|-----|----|----|-------|------------------------------------|---------|---------|-------|---|---------|--------|
| Q8ZP84 UE_SALTY Universal stress protein E | 11 |                      | AFLPIYDFSYEMTTLLSPDERTAM R                          | 36  | 25 | 3  | 12.8  | b12y4y7                            | 2967.40 | 92.291  | 6519  | 4 | 742.61  | -7.57  |
| Q8ZP84 UE_SALTY Universal stress protein E | 12 |                      | IKAFPLPIYDFSYEMTTLLSPDER                            | 34  | 23 | 6  | 40.7  | y7y8*y8y10y11*y11                  | 2749.38 | 74.756  | 2476  | 4 | 688.10  | 1.24   |
| Q8ZP84 UE_SALTY Universal stress protein E | 13 | Carbamidomethyl+C(2) | KCPSPVWMVK                                          | 136 | 10 | 5  | 41.25 | b4*b4b5b7y5                        | 1231.64 | 60.748  | 1602  | 2 | 616.32  | 7.53   |
| P40827 NLPD_SALTY Lipoprotein nlpD         | 1  |                      | VIENFGASEGGNK                                       | 265 | 13 | 5  | 33.35 | b5b8*b8b9y6                        | 1321.63 | 74.709  | 16013 | 2 | 661.32  | -4.99  |
| P40827 NLPD_SALTY Lipoprotein nlpD         | 2  |                      | IATMGSTGTSSTR                                       | 343 | 13 | 10 | 85.72 | b8b9b11y4y6y7*y7y9y10y13           | 1269.61 | 28.726  | 13714 | 2 | 635.31  | -2.98  |
| P40827 NLPD_SALTY Lipoprotein nlpD         | 3  |                      | VVYAGNALR                                           | 297 | 9  | 6  | 31.32 | b1b6*b6y4y7y9                      | 962.53  | 40.818  | 10359 | 2 | 481.77  | -11.03 |
| P40827 NLPD_SALTY Lipoprotein nlpD         | 4  |                      | GSYTGGSSTYTVK                                       | 112 | 12 | 5  | 41.33 | b3y6y7y8y12                        | 1220.57 | 34.489  | 8642  | 2 | 610.79  | -5.00  |
| P40827 NLPD_SALTY Lipoprotein nlpD         | 5  |                      | SAQNSTVAVASQPTITYSEGSGEQ SANK                       | 190 | 28 | 6  | 17.94 | b9b11*b11b13y9y28                  | 2812.34 | 48.626  | 3120  | 3 | 938.12  | 4.86   |
| P40827 NLPD_SALTY Lipoprotein nlpD         | 6  |                      | MLPNNKPAGTVVTVAPVTAPTVST TEPNASSTSTSAPISAWR         | 218 | 41 | 6  | 35.43 | b2b4y10y12y13y14                   | 4110.13 | 69.240  | 2651  | 3 | 1370.71 | 11.64  |
| P40827 NLPD_SALTY Lipoprotein nlpD         | 7  |                      | MGATTQQTPQQAQIQPVQRPVT QPMQTPVTEQPVQMENGR           | 58  | 42 | 3  | 23.78 | y10y11y13                          | 4684.34 | 58.626  | 5350  | 4 | 1171.84 | 8.34   |
| P40827 NLPD_SALTY Lipoprotein nlpD         | 8  |                      | GDTLIFYAWITGNDFR                                    | 125 | 16 | 3  | 35.2  | b8b9b10                            | 1888.94 | 56.035  | 3861  | 2 | 944.98  | 11.70  |
| P40827 NLPD_SALTY Lipoprotein nlpD         | 9  |                      | KGDTLIFYAWITGNDFR                                   | 124 | 17 | 3  | 16.93 | b9y3y9                             | 2017.02 | 70.706  | 2975  | 4 | 505.01  | 1.15   |
| P40827 NLPD_SALTY Lipoprotein nlpD         | 10 |                      | GIDIAGSKGQAIVATADGR                                 | 278 | 19 | 3  | 15.49 | b4b7y5                             | 1799.95 | 106.500 | 2918  | 3 | 600.66  | -5.29  |
| P40827 NLPD_SALTY Lipoprotein nlpD         | 11 |                      | IATMGSTGTSSTRLHFEIR                                 | 343 | 19 | 4  | 24.52 | b5b7b9y3                           | 2065.04 | 69.675  | 2429  | 3 | 689.02  | -5.44  |
| Q8ZQ40 WRBA_SALTY Flavoprotein wrbA        | 1  |                      | LGSVFSSTGTGGGQEQTITSTWTT LAHHGMVIVPIGYAAQELFDVSQ VR | 106 | 49 | 14 | 68.14 | b7b33y1y2y3y4y5y6y7*y7y10y12y16y49 | 5134.57 | 116.792 | 24701 | 4 | 1284.40 | 3.04   |
| Q8ZQ40 WRBA_SALTY Flavoprotein wrbA        | 2  |                      | TQNAPVATPQELADYDAIIFGTPT R                          | 54  | 25 | 7  | 33.31 | b4b11y3y4y6y12y25                  | 2689.35 | 90.675  | 11561 | 3 | 897.12  | 0.18   |
| Q8ZQ40 WRBA_SALTY Flavoprotein wrbA        | 3  |                      | TFLDQTGGLWASGSLYGK                                  | 88  | 18 | 4  | 16.16 | b2b8y3y11                          | 1900.94 | 115.003 | 2647  | 2 | 950.97  | -3.98  |
| Q8ZQ40 WRBA_SALTY Flavoprotein wrbA        | 4  |                      | GGTPYGATTIAGGDGSR                                   | 155 | 17 | 7  | 33.99 | b10*b10b13y6y8y12*y12              | 1537.74 | 34.938  | 22145 | 3 | 513.25  | 8.34   |
| Q8ZQ40 WRBA_SALTY Flavoprotein wrbA        | 5  |                      | FGNMSGQMR                                           | 79  | 9  | 3  | 31.32 | b8y5y7                             | 1027.44 | 38.754  | 12903 | 2 | 514.23  | 0.12   |
| Q8ZQ40 WRBA_SALTY Flavoprotein wrbA        | 6  |                      | VPETMPPEIFAK                                        | 38  | 12 | 5  | 38.32 | b3*b3b5b10y8                       | 1358.73 | 84.007  | 3701  | 2 | 679.87  | 16.80  |
| Q8ZQ40 WRBA_SALTY Flavoprotein wrbA        | 7  |                      | GGTPYGATTIAGGDGSRQPSQEEL SIAR                       | 155 | 28 | 4  | 22.95 | b14y10y23y24                       | 2776.36 | 55.816  | 18865 | 3 | 926.13  | 5.19   |
| Q8ZQ40 WRBA_SALTY Flavoprotein wrbA        | 8  |                      | TQNAPVATPQELADYDAIIFGTPT RFGNMSGQMR                 | 54  | 34 | 7  | 15.77 | b4b6*b6*b6b8*b8y5                  | 3697.81 | 93.933  | 14675 | 3 | 1233.28 | 10.50  |
| Q8ZQ40 WRBA_SALTY Flavoprotein wrbA        | 9  |                      | AKILVLYYSMYGHITMAHAVAE GAK                          | 1   | 26 | 6  | 27.45 | b13*b13b21y5y14y15                 | 2866.44 | 100.244 | 4524  | 3 | 956.15  | -9.11  |
| Q8ZQ40 WRBA_SALTY Flavoprotein wrbA        | 10 |                      | VPETMPPEIFAKAGGK                                    | 38  | 16 | 4  | 28.62 | b3b6b9y4                           | 1671.86 | 40.019  | 2268  | 3 | 557.96  | -8.10  |
| Q8ZQ40 WRBA_SALTY Flavoprotein wrbA        | 11 |                      | LGSVFSSTGTGGGQEQTITSTWTT LA                         | 106 | 26 | 0  | 16.57 |                                    | 2587.22 | 116.797 | 4407  | 3 | 863.08  | -11.89 |
| Q8ZQ40 WRBA_SALTY Flavoprotein wrbA        | 12 |                      | TQNAPVATPQELADYDAI                                  | 54  | 18 | 2  | 8.06  | y12*y12                            | 1916.92 | 90.698  | 1756  | 3 | 639.64  | -3.69  |
| Q7CR64 YAEH_SALTY UPF0325 protein yaeH     | 1  |                      | TVVADGIGQGYKEVQEISPNLR                              | 55  | 22 | 10 | 44.21 | b2*b2b4y4*y4y6y9y11y13y22          | 2373.24 | 72.503  | 38767 | 3 | 791.75  | 0.41   |
| Q7CR64 YAEH_SALTY UPF0325 protein yaeH     | 2  |                      | SLGITNPEEIDR                                        | 6   | 12 | 3  | 23.03 | b7b10y6                            | 1343.70 | 49.933  | 2513  | 3 | 448.57  | 13.26  |

|                                                  |    |                       |                                    |     |    |   |       |                             |         |         |       |   |         |        |
|--------------------------------------------------|----|-----------------------|------------------------------------|-----|----|---|-------|-----------------------------|---------|---------|-------|---|---------|--------|
| Q7CR64 YAEH_SALTY UPF0325 protein yaeH           | 3  | Carbamidomethyl+C(10) | YVIDELDQICQRDR                     | 77  | 14 | 8 | 49.76 | b2b10y2y3y4y9°y9y10         | 1822.85 | 56.311  | 2398  | 3 | 608.29  | -14.40 |
| Q7CR64 YAEH_SALTY UPF0325 protein yaeH           | 4  |                       | ILDDLRL                            | 99  | 6  | 1 | 13.91 | b5                          | 744.42  | 52.531  | 13301 | 1 | 744.42  | -9.35  |
| Q7CR64 YAEH_SALTY UPF0325 protein yaeH           | 5  |                       | ISEIEADLDK                         | 114 | 10 | 4 | 34.7  | y4y5°y5y9                   | 1132.55 | 100.181 | 2231  | 1 | 1132.55 | -18.86 |
| Q7CR64 YAEH_SALTY UPF0325 protein yaeH           | 6  |                       | TVVADGIGQGYKEVQEISPNLR             | 55  | 22 | 5 | 23.78 | b9°b9°b9b10b20              | 2373.26 | 78.958  | 21417 | 3 | 791.76  | 8.44   |
| Q7CR64 YAEH_SALTY UPF0325 protein yaeH           | 7  | Carbamidomethyl+C(10) | YVIDELDQICQRDR                     | 77  | 14 | 5 | 39.74 | b5b7°b7b8b12                | 1822.86 | 65.759  | 2789  | 3 | 608.29  | -9.24  |
| Q7CR64 YAEH_SALTY UPF0325 protein yaeH           | 8  | Carbamidomethyl+C(20) | EVQEISPNLRYVIDELDQICQR             | 67  | 22 | 4 | 22.66 | b7°b7y5y6                   | 2717.36 | 120.108 | 2684  | 3 | 906.46  | 2.34   |
| Q7CR64 YAEH_SALTY UPF0325 protein yaeH           | 9  |                       | YDNLKSLGITNPEEIDR                  | 1   | 17 | 5 | 16.93 | b6b13y12°y12*y12            | 1977.00 | 82.868  | 2147  | 2 | 989.01  | 6.17   |
| Q7CR64 YAEH_SALTY UPF0325 protein yaeH           | 10 |                       | SLGITNPEEIDRYSLR                   | 6   | 16 | 6 | 29.29 | b9b13*b13b14°b14y9          | 1862.94 | 103.425 | 1565  | 2 | 931.97  | -13.30 |
| P14062 6PGD_SALTY 6-phohogluconate dehydrogenase | 1  |                       | IVSYAQGFSQLR                       | 329 | 12 | 8 | 48.99 | b2y6y7°y7y9°y9y10°y10       | 1368.73 | 63.196  | 10158 | 2 | 684.87  | -0.80  |
| P14062 6PGD_SALTY 6-phohogluconate dehydrogenase | 2  | Carbamidomethyl+C(11) | IAAVAEDGEPCVTYIGADGAGHY VK         | 158 | 25 | 4 | 12.8  | b10°b10b21y10               | 2563.24 | 72.899  | 8487  | 3 | 855.08  | 9.72   |
| P14062 6PGD_SALTY 6-phohogluconate dehydrogenase | 3  |                       | NLALNIESR                          | 16  | 9  | 4 | 39.1  | b2y4y5y6                    | 1029.57 | 72.082  | 4749  | 2 | 515.29  | 0.12   |
| P14062 6PGD_SALTY 6-phohogluconate dehydrogenase | 4  |                       | ELSAEGFNFIGTGVSGGEEGALK            | 113 | 23 | 8 | 34.66 | b5b11°b11b13°b13y13°y13 y14 | 2269.09 | 68.481  | 3705  | 2 | 1135.05 | -2.37  |
| P14062 6PGD_SALTY 6-phohogluconate dehydrogenase | 5  |                       | WTSQSALDLGEPLSLITESVFAR            | 264 | 23 | 9 | 36.7  | b4b8°b8b9°b9y3y5y8y23       | 2520.31 | 117.778 | 2815  | 2 | 1260.66 | 4.65   |
| P14062 6PGD_SALTY 6-phohogluconate dehydrogenase | 6  |                       | GDIIDGGNTFFQDTIR                   | 93  | 17 | 5 | 25.58 | y9°y9y10*y10y13             | 1881.93 | 91.558  | 2295  | 2 | 941.47  | -4.61  |
| P14062 6PGD_SALTY 6-phohogluconate dehydrogenase | 7  |                       | AAVLPANLIQAQR                      | 432 | 13 | 3 | 21.36 | b3y3y9                      | 1364.80 | 65.318  | 6393  | 2 | 682.90  | 0.89   |
| P14062 6PGD_SALTY 6-phohogluconate dehydrogenase | 8  |                       | DVVVAYAVQNGIPVPTFSAAVAYY DSYR      | 405 | 27 | 4 | 23.09 | y6y7y9°y9                   | 2936.45 | 134.440 | 1963  | 3 | 979.49  | 0.67   |
| P14062 6PGD_SALTY 6-phohogluconate dehydrogenase | 9  |                       | AEFIEK                             | 314 | 6  | 1 | 13.91 | b4                          | 736.40  | 84.337  | 1926  | 1 | 736.40  | 14.42  |
| P14062 6PGD_SALTY 6-phohogluconate dehydrogenase | 10 |                       | MSKQQIGVVGMAMVGR                   | 0   | 16 | 4 | 31.75 | b7b11y4y5                   | 1691.85 | 101.729 | 6786  | 2 | 846.43  | -12.55 |
| P14062 6PGD_SALTY 6-phohogluconate dehydrogenase | 11 |                       | ELSAEGFNFIGTGVSGGEEGALKG PSIMPGGQK | 113 | 33 | 6 | 11.22 | b7°b7b12°b12*b12y8          | 3221.56 | 84.294  | 6486  | 3 | 1074.53 | -4.24  |
| P14062 6PGD_SALTY 6-phohogluconate dehydrogenase | 12 |                       | AQPAGDKAEFIEK                      | 307 | 13 | 3 | 28.84 | y3y7y8                      | 1403.71 | 36.461  | 5618  | 2 | 702.36  | -2.17  |
| P14062 6PGD_SALTY 6-phohogluconate dehydrogenase | 13 |                       | KIADEYQQALR                        | 394 | 11 | 8 | 81.43 | b5b6°b6b9y3y4y7y8           | 1334.72 | 44.856  | 3642  | 3 | 445.58  | 12.53  |
| P14062 6PGD_SALTY 6-phohogluconate dehydrogenase | 14 | Phosphoryl STY(15)    | ELSAEGFNFIGTGVSGGEEGALK            | 113 | 23 | 4 | 22.52 | b13*b13b14y8                | 2349.04 | 104.335 | 4368  | 4 | 588.02  | -6.34  |
| P14062 6PGD_SALTY 6-phohogluconate dehydrogenase | 15 | Oxidation+M(8)        | QQIGVVGMAMVGR                      | 3   | 13 | 3 | 28.84 | y3y4y9                      | 1361.72 | 48.869  | 1935  | 3 | 454.58  | 11.83  |
| P66955 TALB_SALTY Transaldolase B                | 1  |                       | LSYDTEASIAK                        | 100 | 11 | 3 | 36.84 | y8y9y10                     | 1197.60 | 44.963  | 22145 | 2 | 599.30  | -2.34  |
| P66955 TALB_SALTY Transaldolase B                | 2  |                       | ISTEVDAR                           | 92  | 8  | 6 | 58.28 | b7y2y3y5y7y8                | 890.44  | 28.747  | 14770 | 2 | 445.73  | -14.81 |
| P66955 TALB_SALTY Transaldolase B                | 3  |                       | LYQPQDATTNPSLILNAAQIPEYR           | 25  | 24 | 6 | 13.12 | b8y2y4°y4y9y24              | 2716.40 | 82.247  | 7846  | 3 | 906.14  | 3.51   |
| P66955 TALB_SALTY Transaldolase B                | 4  |                       | ELAESEGAIER                        | 250 | 11 | 4 | 25.08 | b3y7y9y11                   | 1203.59 | 37.218  | 5500  | 2 | 602.30  | 2.64   |
| P66955 TALB_SALTY Transaldolase B                | 5  |                       | LYNDAGISNDR                        | 117 | 11 | 5 | 39.41 | b3b7y4y5y11                 | 1237.59 | 63.147  | 3334  | 3 | 413.20  | 3.75   |
| P66955 TALB_SALTY Transaldolase B                | 6  |                       | AAEQLEK                            | 141 | 7  | 4 | 21.8  | b4y4°y4*y4                  | 788.41  | 35.495  | 2208  | 1 | 788.41  | -4.80  |

|                                                                      |    |                                                      |                                        |     |    |    |       |                                     |         |         |        |   |         |        |
|----------------------------------------------------------------------|----|------------------------------------------------------|----------------------------------------|-----|----|----|-------|-------------------------------------|---------|---------|--------|---|---------|--------|
| P66955 TALB_SALTY Transaldolase B                                    | 7  | Carbamidomethyl+C(11)                                | NVGEILELAGCDR                          | 228 | 13 | 4  | 30.7  | b3b7y6y11                           | 1445.73 | 74.516  | 8221   | 2 | 723.37  | 17.65  |
| P66955 TALB_SALTY Transaldolase B                                    | 8  |                                                      | MIGDLL                                 | 311 | 6  | 2  | 13.91 | b5°b5                               | 661.35  | 79.371  | 7984   | 1 | 661.35  | -11.91 |
| P66955 TALB_SALTY Transaldolase B                                    | 9  |                                                      | LTSLR                                  | 4   | 5  | 1  | 13.53 | y4                                  | 589.37  | 64.482  | 6344   | 1 | 589.37  | 6.32   |
| P66955 TALB_SALTY Transaldolase B                                    | 10 | Carbamidomethyl+C(2)                                 | ACAEAGVYLISPFVGR                       | 165 | 16 | 3  | 17.8  | b3b14y14                            | 1709.87 | 95.052  | 3725   | 2 | 855.44  | 1.43   |
| P66955 TALB_SALTY Transaldolase B                                    | 11 |                                                      | ITEAEFLWQH HQDPMAVDK LADG<br>IR        | 275 | 25 | 3  | 19.02 | y3y5y12                             | 2920.43 | 74.820  | 15215  | 4 | 730.86  | -4.01  |
| P66955 TALB_SALTY Transaldolase B                                    | 12 |                                                      | LASTWQGIRAAEQLEK                       | 132 | 16 | 3  | 17.8  | b3y5y12                             | 1800.95 | 78.844  | 2069   | 2 | 900.98  | -3.73  |
| P66955 TALB_SALTY Transaldolase B                                    | 13 |                                                      | LYQPQDATTN                             | 25  | 10 | 0  | 7.16  |                                     | 1150.53 | 82.302  | 1609   | 2 | 575.77  | -9.87  |
| P0A2N2 VSDE_SALTY Virulence protein<br>vsdE                          | 1  | Carbamidomethyl+C(12)                                | IIFGHELNQSYCLNSIDEVEK                  | 110 | 21 | 4  | 14.38 | b6°b6y5y10                          | 2508.20 | 124.059 | 3238   | 3 | 836.74  | -1.65  |
| P0A2N2 VSDE_SALTY Virulence protein<br>vsdE                          | 2  | Carbamidomethyl+C(6)                                 | IKDALCIESKER                           | 31  | 12 | 7  | 55.53 | b8b9y2y6y7y8y12                     | 1461.77 | 42.323  | 2480   | 3 | 487.93  | -3.34  |
| P0A2N2 VSDE_SALTY Virulence protein<br>vsdE                          | 3  |                                                      | HFSSSGEFYVR                            | 198 | 11 | 4  | 25.08 | b3y5y8°y8                           | 1315.58 | 43.767  | 155814 | 3 | 439.20  | -18.84 |
| P0A2N2 VSDE_SALTY Virulence protein<br>vsdE                          | 4  |                                                      | NTASPTVGLDSAIVDK                       | 94  | 16 | 4  | 25.21 | b8b15y7y14                          | 1587.81 | 67.947  | 2583   | 2 | 794.41  | -10.22 |
| P0A2N2 VSDE_SALTY Virulence protein<br>vsdE                          | 5  | Carbamidomethyl+C(9)                                 | HDFNAV VICEYDK                         | 161 | 13 | 6  | 42.69 | b4b11y4°y4y5y9                      | 1609.77 | 51.380  | 2489   | 2 | 805.39  | 21.16  |
| P0A2N2 VSDE_SALTY Virulence protein<br>vsdE                          | 6  | Carbamidomethyl+C(19)                                | ESSFIISAENYIAPIIGECCR                  | 141 | 20 | 5  | 14.9  | b5°b5b8°b8y7                        | 2269.12 | 95.404  | 1655   | 4 | 568.04  | 3.34   |
| P0A2N2 VSDE_SALTY Virulence protein<br>vsdE                          | 7  | Carbamidomethyl+C(4)                                 | DALCIESKER                             | 33  | 10 | 4  | 42.22 | b4b7y8y9                            | 1220.59 | 32.572  | 20393  | 2 | 610.80  | -6.60  |
| P0A2N2 VSDE_SALTY Virulence protein<br>vsdE                          | 8  | Carbamidomethyl+C(19)<br>;Carbamidomethyl+C(29)<br>) | ESSFIISAENYIAPIIGECR HDFNAV<br>VICEYDK | 141 | 33 | 5  | 18.61 | b5b9b11y7y9                         | 3859.80 | 91.610  | 12297  | 3 | 1287.27 | -9.17  |
| P0A2N2 VSDE_SALTY Virulence protein<br>vsdE                          | 9  | Carbamidomethyl+C(20)                                | RESSFIISAENYIAPIIGECCR                 | 140 | 21 | 11 | 63.5  | b3°b3b4b5b10°b10b14°b1<br>4y5y16y17 | 2425.21 | 102.810 | 2255   | 2 | 1213.11 | -3.42  |
| P0A2N2 VSDE_SALTY Virulence protein<br>vsdE                          | 10 |                                                      | VSGSASSQDIISRINSK                      | 2   | 17 | 3  | 25.58 | b4b5b7                              | 1748.90 | 80.057  | 1795   | 2 | 874.95  | -8.10  |
| P0A2N2 VSDE_SALTY Virulence protein<br>vsdE                          | 11 |                                                      | KHFSSSGEFYVR                           | 197 | 12 | 4  | 35.31 | b10y5y10y11                         | 1443.68 | 92.742  | 1526   | 2 | 722.35  | -12.77 |
| P0A2N2 VSDE_SALTY Virulence protein<br>vsdE                          | 12 | Phosphoryl STY(8)                                    | ILYPQNLSR                              | 43  | 9  | 4  | 31.32 | b6b8°b8y8                           | 1183.56 | 41.711  | 30712  | 3 | 395.19  | -12.07 |
| Q8ZJW6 RSMC_SALTY Ribosomal RNA<br>small subunit methyltransferase C | 1  |                                                      | ILDETFGFHEVIAQTGR                      | 311 | 17 | 6  | 58.78 | b3b4b5b6y5y13                       | 1933.01 | 87.538  | 4770   | 3 | 645.01  | 14.52  |
| Q8ZJW6 RSMC_SALTY Ribosomal RNA<br>small subunit methyltransferase C | 2  |                                                      | HLNSGGELR                              | 291 | 9  | 4  | 16.53 | b5y3°y3y9                           | 982.52  | 35.935  | 3892   | 2 | 491.76  | 13.17  |
| Q8ZJW6 RSMC_SALTY Ribosomal RNA<br>small subunit methyltransferase C | 3  |                                                      | QPQFSLESWWAEYNIDGLTIK                  | 149 | 21 | 6  | 42.73 | b5b6°b6b11b12y15                    | 2525.29 | 72.894  | 26190  | 3 | 842.43  | 20.79  |
| Q8ZJW6 RSMC_SALTY Ribosomal RNA<br>small subunit methyltransferase C | 4  |                                                      | SAFTPASEVLLR                           | 1   | 12 | 4  | 30.23 | b4b10°b10b11                        | 1290.69 | 67.140  | 12177  | 2 | 645.85  | -15.32 |
| Q8ZJW6 RSMC_SALTY Ribosomal RNA<br>small subunit methyltransferase C | 5  |                                                      | ATLAANGLEGEVFASNVFSEVK                 | 237 | 22 | 4  | 13.91 | b14°b14b16y11                       | 2253.19 | 95.388  | 5981   | 3 | 751.73  | 21.67  |
| Q8ZJW6 RSMC_SALTY Ribosomal RNA<br>small subunit methyltransferase C | 6  |                                                      | NKPEAQFQLMNILSLMPSGVDVF<br>VVGENR      | 86  | 29 | 4  | 22.22 | b7y11y12*y12                        | 3232.59 | 121.783 | 4679   | 3 | 1078.20 | -17.37 |

|                                                                   |    |                                             |                                               |     |    |    |       |                                                |         |         |       |   |         |        |
|-------------------------------------------------------------------|----|---------------------------------------------|-----------------------------------------------|-----|----|----|-------|------------------------------------------------|---------|---------|-------|---|---------|--------|
| Q8ZJW6 RSMC_SALTY Ribosomal RNA small subunit methyltransferase C | 7  | Carbamidomethyl+C(4)                        | LTLCDVSAPAVEASR                               | 222 | 15 | 3  | 18.81 | b12y6y13                                       | 1588.80 | 87.794  | 2698  | 2 | 794.91  | 1.92   |
| Q8ZJW6 RSMC_SALTY Ribosomal RNA small subunit methyltransferase C | 8  | Carbamidomethyl+C(13)                       | FSLVAQASDVADCDTLIYYWPK                        | 64  | 22 | 4  | 22.66 | b10*b10y9y10                                   | 2562.19 | 81.801  | 2488  | 3 | 854.73  | -13.24 |
| Q8ZJW6 RSMC_SALTY Ribosomal RNA small subunit methyltransferase C | 9  | Carbamidomethyl+C(4)                        | LTLCDVSAPAVEASRATLAANGL<br>EGEVFASNVFSEVK     | 222 | 37 | 4  | 21.74 | b5b9b10y13                                     | 3822.87 | 99.571  | 26170 | 3 | 1274.96 | -13.28 |
| Q8ZJW6 RSMC_SALTY Ribosomal RNA small subunit methyltransferase C | 10 | Carbamidomethyl+C(17)                       | ILFAGDLQDDLPARFECAASR                         | 22  | 21 | 3  | 14.38 | b16y8y10                                       | 2365.15 | 89.100  | 8000  | 3 | 789.06  | -2.89  |
| Q8ZJW6 RSMC_SALTY Ribosomal RNA small subunit methyltransferase C | 11 |                                             | QPQFSLESWWAEYNIDGLTIKTLPGVFSR                 | 149 | 29 | 7  | 53.4  | b4b5b8b9°b9y3y4                                | 3382.75 | 103.576 | 4473  | 3 | 1128.26 | 12.63  |
| Q8ZJW6 RSMC_SALTY Ribosomal RNA small subunit methyltransferase C | 12 |                                             | SAEPLMADYAPLNKVD SAR                          | 119 | 19 | 3  | 15.49 | b7b11y5                                        | 2047.98 | 125.691 | 1526  | 2 | 1024.50 | -13.17 |
| Q8ZJW6 RSMC_SALTY Ribosomal RNA small subunit methyltransferase C | 13 | Carbamidomethyl+C(6);<br>Phosphoryl STY(12) | VLDVGCAGVLSAALASHSPK                          | 199 | 21 | 6  | 19.74 | b8°b8b11°b11y6y11                              | 2089.03 | 102.770 | 5174  | 3 | 697.01  | 10.40  |
| Q8ZJW6 RSMC_SALTY Ribosomal RNA small subunit methyltransferase C | 14 | Oxidation+M(10)                             | NKPEAQFQLMNL SLMPSGVDVF<br>VVGENR             | 86  | 29 | 3  | 11.81 | b9b11y9                                        | 3248.64 | 95.253  | 2980  | 4 | 812.92  | -0.23  |
| Q8ZJW6 RSMC_SALTY Ribosomal RNA small subunit methyltransferase C | 15 | Oxidation+M(5)                              | SAEPLMADYAPLNK                                | 119 | 14 | 3  | 25.42 | b3b4y4                                         | 1535.75 | 53.761  | 2160  | 3 | 512.59  | 5.01   |
| P06196 USHA_SALTY Silent protein ushA(0)                          | 1  |                                             | VVIQELNMNEKPDVVIATTHMGH<br>YDNGDHGSNAPGDVEMAR | 197 | 41 | 17 | 95.57 | b1b2b3b8*b8b12y2y4°y4y<br>5y6y7y8y11y12*y12y13 | 4475.03 | 69.757  | 30860 | 6 | 746.68  | -10.69 |
| P06196 USHA_SALTY Silent protein ushA(0)                          | 2  |                                             | IAVIGLTTDDTAK                                 | 164 | 13 | 3  | 21.36 | b3b11y5                                        | 1317.73 | 61.445  | 17014 | 2 | 659.37  | -0.28  |
| P06196 USHA_SALTY Silent protein ushA(0)                          | 3  |                                             | QNGIWIVQAHEWGK                                | 279 | 14 | 8  | 84.59 | y1y3y5y6y8y10y13y14                            | 1665.85 | 103.443 | 12851 | 3 | 555.96  | 0.44   |
| P06196 USHA_SALTY Silent protein ushA(0)                          | 4  |                                             | SEYGEYGLAAQK                                  | 48  | 12 | 4  | 30.23 | y4y9y10y12                                     | 1315.61 | 44.632  | 11440 | 2 | 658.31  | -6.50  |
| P06196 USHA_SALTY Silent protein ushA(0)                          | 5  |                                             | EVAQEGGSVLLSGGDINTGVPESDLQDAEPDFR             | 68  | 34 | 4  | 13.51 | b5b15y5y21                                     | 3514.64 | 73.292  | 7197  | 3 | 1172.22 | -12.09 |
| P06196 USHA_SALTY Silent protein ushA(0)                          | 6  |                                             | VQPFGNIVVYADMSGK                              | 425 | 16 | 4  | 17.8  | b11y5y13y16                                    | 1724.86 | 87.572  | 6305  | 3 | 575.62  | -6.72  |
| P06196 USHA_SALTY Silent protein ushA(0)                          | 7  |                                             | IGNPEYFTDIEFR                                 | 177 | 13 | 3  | 35.83 | y7y8y9                                         | 1600.77 | 78.231  | 5232  | 3 | 534.26  | 5.72   |
| P06196 USHA_SALTY Silent protein ushA(0)                          | 8  |                                             | IDNKPgyVNTGFIDAEVLK                           | 508 | 19 | 3  | 15.49 | b6y6y9                                         | 2093.12 | 69.772  | 33561 | 3 | 698.38  | 14.23  |
| P06196 USHA_SALTY Silent protein ushA(0)                          | 9  |                                             | VLYTPEIAENPQMLSLLTPFQNK                       | 332 | 23 | 3  | 22.52 | b4y5y6                                         | 2646.38 | 101.644 | 12447 | 3 | 882.80  | -1.38  |
| P06196 USHA_SALTY Silent protein ushA(0)                          | 10 |                                             | GMNLIGYDAMAVGNHEFDNPLTVLR                     | 102 | 25 | 4  | 28.57 | b3b7b10b11                                     | 2747.39 | 95.517  | 12444 | 3 | 916.47  | 21.95  |
| P06196 USHA_SALTY Silent protein ushA(0)                          | 11 | Carbamidomethyl+C(10)                       | QVNYVPGTPCAPDK                                | 265 | 14 | 4  | 28.55 | b7b10b12*b12                                   | 1545.70 | 70.548  | 9839  | 3 | 515.91  | -20.93 |
| P06196 USHA_SALTY Silent protein ushA(0)                          | 12 | Carbamidomethyl+C(20)                       | SLPAGSLAMIVGGHSQDPVCMAS<br>ENK                | 238 | 26 | 4  | 12.5  | b17y5y11°y11                                   | 2656.30 | 78.206  | 4629  | 3 | 886.11  | 18.01  |
| P06196 USHA_SALTY Silent protein ushA(0)                          | 13 |                                             | FPFLYANIYQK                                   | 134 | 11 | 3  | 28.09 | b7y4y5                                         | 1403.74 | 29.534  | 4478  | 3 | 468.59  | 6.26   |
| P06196 USHA_SALTY Silent protein ushA(0)                          | 14 |                                             | ADFEFR                                        | 297 | 6  | 2  | 27.44 | b5y5                                           | 784.36  | 51.415  | 4223  | 2 | 392.68  | -9.34  |
| P06196 USHA_SALTY Silent protein ushA(0)                          | 15 |                                             | MATLSFNATGGDGYPR                              | 492 | 16 | 6  | 36.71 | b8b13y4y5y12°y12                               | 1657.76 | 81.874  | 3842  | 2 | 829.38  | -4.71  |

|                                                               |    |                                          |                                   |     |    |    |       |                                            |         |         |       |   |         |        |
|---------------------------------------------------------------|----|------------------------------------------|-----------------------------------|-----|----|----|-------|--------------------------------------------|---------|---------|-------|---|---------|--------|
| [P06196]USHA_SALTY Silent protein<br>ushA(0)                  | 16 |                                          | ITILHTNDHHGHFWR                   | 33  | 15 | 3  | 18.81 | b10b12y10                                  | 1883.94 | 105.721 | 2933  | 2 | 942.47  | 0.06   |
| [P06196]USHA_SALTY Silent protein<br>ushA(0)                  | 17 |                                          | EFIQQNSPLDAAFTPNGEVSWL            | 527 | 23 | 13 | 49.8  | b8*b8b12y7*y7y9*y9*y9y<br>10y11y13*y13*y13 | 2534.26 | 109.651 | 1616  | 3 | 845.42  | 14.84  |
| [P06196]USHA_SALTY Silent protein<br>ushA(0)                  | 18 |                                          | QQEK                              | 127 | 4  | 1  | 13.16 | y3                                         | 532.27  | 64.241  | 1538  | 1 | 532.27  | -4.70  |
| [P06196]USHA_SALTY Silent protein<br>ushA(0)                  | 19 |                                          | AQLEVKIGSVNGLLEGDR                | 357 | 18 | 4  | 22.64 | b3b15y11y16                                | 1898.01 | 60.846  | 22391 | 2 | 949.51  | -12.61 |
| [P06196]USHA_SALTY Silent protein<br>ushA(0)                  | 20 |                                          | GMNLIGYDAMAVGNHEFDNPLT<br>VLRQQEK | 102 | 29 | 5  | 15.11 | b4*b4b10y5y18                              | 3260.56 | 66.279  | 7444  | 5 | 652.92  | -5.47  |
| [P06196]USHA_SALTY Silent protein<br>ushA(0)                  | 21 | Carbamidomethyl+C(10)                    | QVNYVPGTPCAPDKQNGIWIWQA<br>HEWGK  | 265 | 28 | 7  | 27.38 | b4*b4b5*b5b7b11y23                         | 3192.57 | 71.988  | 3887  | 3 | 1064.86 | 1.84   |
| [P06196]USHA_SALTY Silent protein<br>ushA(0)                  | 22 | Oxidation+M(10)                          | GMNLIGYDAMAVGNHEFDNPLT<br>VLR     | 102 | 25 | 3  | 12.8  | b7y14y17                                   | 2763.32 | 67.569  | 3860  | 3 | 921.78  | -2.39  |
| [P06196]USHA_SALTY Silent protein<br>ushA(0)                  | 23 |                                          | VVIQELNMN                         | 197 | 9  | 0  | 13.56 |                                            | 1059.56 | 69.711  | 21767 | 2 | 530.28  | 6.11   |
| [P06196]USHA_SALTY Silent protein<br>ushA(0)                  | 24 |                                          | GGDINTGVPESDLQDAEPDFR             | 81  | 21 | 4  | 36.93 | b3b4b5b8                                   | 2232.04 | 73.295  | 8702  | 2 | 1116.52 | 14.88  |
| [P06196]USHA_SALTY Silent protein<br>ushA(0)                  | 25 |                                          | QNGIWIWQAHEWGK                    | 279 | 14 | 0  | 3.39  |                                            | 1647.84 | 103.420 | 3280  | 2 | 824.42  | 4.96   |
| [Q8ZJV7]DEOD_SALTY Purine nucleoside<br>phohorylase deoD-type | 1  | Carbamidomethyl+C(13)                    | ISVMGHGMGIPSCSIYTKELITDFG<br>VK   | 57  | 27 | 4  | 26.54 | b5b7b9b12                                  | 2940.44 | 112.250 | 7900  | 4 | 735.86  | -10.21 |
| [Q8ZJV7]DEOD_SALTY Purine nucleoside<br>phohorylase deoD-type | 2  |                                          | ATPHINAEMGDFADVVLMPGDPL<br>R      | 1   | 24 | 3  | 22.42 | b9b10y8                                    | 2566.24 | 76.776  | 6081  | 4 | 642.32  | 0.38   |
| [Q8ZJV7]DEOD_SALTY Purine nucleoside<br>phohorylase deoD-type | 3  |                                          | MATPHINAEMGDFADVVLMPGD<br>PLR     | 0   | 25 | 4  | 12.8  | b24y5y7*y7                                 | 2697.27 | 74.672  | 4259  | 4 | 675.07  | -3.44  |
| [Q8ZJV7]DEOD_SALTY Purine nucleoside<br>phohorylase deoD-type | 4  |                                          | QTFNDMIK                          | 218 | 9  | 4  | 31.32 | b4b5y6y9                                   | 1097.53 | 51.722  | 3785  | 3 | 366.52  | 1.00   |
| [Q8ZJV7]DEOD_SALTY Purine nucleoside<br>phohorylase deoD-type | 5  | Carbamidomethyl+C(13)                    | ISVMGHGMGIPSCSIYTK                | 57  | 18 | 3  | 16.16 | b12y10y16                                  | 1937.95 | 72.032  | 3374  | 4 | 485.24  | 13.48  |
| [Q8ZJV7]DEOD_SALTY Purine nucleoside<br>phohorylase deoD-type | 6  |                                          | YGVLGVEMEAAGIYGVAAEFGAK           | 173 | 23 | 5  | 36.31 | b12b13y2y16y17                             | 2302.13 | 81.618  | 1851  | 2 | 1151.57 | -4.14  |
| [Q8ZJV7]DEOD_SALTY Purine nucleoside<br>phohorylase deoD-type | 7  | Carbamidomethyl+C(9)                     | DVVIGMGACTDSK                     | 102 | 13 | 5  | 33.35 | b3b7*b7b8y3                                | 1352.65 | 93.545  | 8561  | 2 | 676.83  | 20.58  |
| [Q8ZJV7]DEOD_SALTY Purine nucleoside<br>phohorylase deoD-type | 8  |                                          | GMLGFTGTYK                        | 44  | 10 | 3  | 34.7  | b4b7b8                                     | 1074.55 | 27.777  | 3948  | 2 | 537.78  | 20.68  |
| [Q8ZJV7]DEOD_SALTY Purine nucleoside<br>phohorylase deoD-type | 9  | Carbamidomethyl+C(5)                     | ALTICTVSDHIRTHERQTTAAER           | 196 | 22 | 4  | 23.78 | b3*b3b4b11                                 | 2510.22 | 68.662  | 14130 | 4 | 628.31  | -7.78  |
| [Q8ZJV7]DEOD_SALTY Purine nucleoside<br>phohorylase deoD-type | 10 | Carbamidomethyl+C(14)                    | KISVMGHGMGIPSCSIYTK               | 56  | 19 | 4  | 15.49 | b7b14y10*y10                               | 2066.00 | 85.374  | 3565  | 2 | 1033.50 | -13.59 |
| [Q8ZJV7]DEOD_SALTY Purine nucleoside<br>phohorylase deoD-type | 11 |                                          | THEQTTAAERQTFNDMIK                | 208 | 19 | 3  | 15.49 | b4b8y10                                    | 2222.07 | 89.249  | 2297  | 2 | 1111.54 | 7.91   |
| [Q8ZJV7]DEOD_SALTY Purine nucleoside<br>phohorylase deoD-type | 12 |                                          | EVNNVRGMLGFTGTYK                  | 38  | 16 | 5  | 28.62 | b5*b5y7y10y12                              | 1785.88 | 40.524  | 1897  | 2 | 893.44  | -10.25 |
| [Q8ZJV7]DEOD_SALTY Purine nucleoside<br>phohorylase deoD-type | 13 | Carbamidomethyl+C(13)<br>;Oxidation+M(8) | ISVMGHGMGIPSCSIYTKELITDFG<br>VK   | 57  | 27 | 5  | 35.08 | b5b8b10b12b13                              | 2956.46 | 134.296 | 7923  | 3 | 986.16  | -1.49  |
| [Q8ZJV7]DEOD_SALTY Purine nucleoside<br>phohorylase deoD-type | 14 | Oxidation+M(2)                           | GMLGFTGTYK                        | 44  | 10 | 5  | 41.25 | b8y6*y6y7y9                                | 1090.52 | 90.556  | 2556  | 1 | 1090.52 | -7.28  |
| [Q8ZJV7]DEOD_SALTY Purine nucleoside<br>phohorylase deoD-type | 15 |                                          | DFADVVLMPGDPLR                    | 11  | 14 | 3  | 12.27 | b3b6*b6                                    | 1544.77 | 74.727  | 5604  | 2 | 772.89  | -7.74  |
| [Q8ZR01]RLPA_SALTY Rare lipoprotein<br>A                      | 1  |                                          | LSQQFSVPGR                        | 329 | 10 | 7  | 75.31 | b3*b3b7y3y5y6y9                            | 1118.59 | 48.445  | 20781 | 2 | 559.80  | -2.29  |
| [Q8ZR01]RLPA_SALTY Rare lipoprotein<br>A                      | 2  |                                          | VIQNGAVWR                         | 339 | 9  | 8  | 46.61 | b2b5*b5y3y6y7*y7y9                         | 1042.57 | 46.025  | 12109 | 2 | 521.79  | -5.74  |
| [Q8ZR01]RLPA_SALTY Rare lipoprotein<br>A                      | 3  |                                          | FVVQVGAVSDQTR                     | 309 | 13 | 5  | 26.13 | b2b4y8y9y13                                | 1405.74 | 57.199  | 7701  | 2 | 703.37  | -3.47  |

|                                                |    |                                           |                                                     |     |    |   |       |                                  |         |         |       |   |         |        |
|------------------------------------------------|----|-------------------------------------------|-----------------------------------------------------|-----|----|---|-------|----------------------------------|---------|---------|-------|---|---------|--------|
| Q8ZR01 RLPA_SALTY Rare lipoprotein A           | 4  |                                           | LQTEAQLQSFIAAQ                                      | 366 | 15 | 3 | 26.89 | y3y5y6                           | 1634.85 | 84.021  | 15453 | 3 | 545.62  | 4.63   |
| Q8ZR01 RLPA_SALTY Rare lipoprotein A           | 5  |                                           | FSQAGLAAIYDAEPGSLNTASGEM<br>FDPMQLTAAHPTLPIPSYAR    | 78  | 44 | 3 | 10.91 | b4y7y10                          | 4607.24 | 100.546 | 9399  | 4 | 1152.56 | 2.97   |
| Q8ZR01 RLPA_SALTY Rare lipoprotein A           | 6  | Carbamidomethyl+C(19)                     | IDPIIVAPDGSLSGPGMACTTVAK                            | 167 | 24 | 3 | 13.12 | b11b17y10                        | 2370.24 | 70.533  | 3268  | 4 | 593.32  | 15.04  |
| Q8ZR01 RLPA_SALTY Rare lipoprotein A           | 7  |                                           | AAADRLNTSNNTK                                       | 152 | 13 | 3 | 21.36 | b3y5y9                           | 1375.70 | 63.040  | 39006 | 2 | 688.35  | 4.53   |
| Q8ZR01 RLPA_SALTY Rare lipoprotein A           | 8  | Carbamidomethyl+C(21)                     | VRIDPIIVAPDGSLSGPGMACTTV<br>AK                      | 165 | 26 | 6 | 36.11 | b6y7y9y10y12y14                  | 2625.38 | 74.295  | 22553 | 3 | 875.80  | 3.44   |
| Q8ZR01 RLPA_SALTY Rare lipoprotein A           | 9  |                                           | AQQYQQRLSQQFSVPGR                                   | 322 | 17 | 6 | 23.85 | b3b5*b5y10*y10y16                | 2021.02 | 78.754  | 5287  | 2 | 1011.01 | -4.29  |
| Q8ZR01 RLPA_SALTY Rare lipoprotein A           | 10 |                                           | INDRGPYGTDR                                         | 135 | 11 | 4 | 36.84 | b5*b5b7b9                        | 1263.60 | 42.430  | 2864  | 2 | 632.30  | -5.02  |
| Q8ZR01 RLPA_SALTY Rare lipoprotein A           | 11 | Carbamidomethyl+C(19)<br>;Oxidation+M(17) | IDPIIVAPDGSLSGPGMACTTVAK                            | 167 | 24 | 4 | 17.6  | b14b21y9y12                      | 2386.21 | 114.862 | 3245  | 3 | 796.07  | 4.19   |
| Q8ZPD6 YNCE_SALTY Uncharacterized protein yncE | 1  |                                           | TFDTPPTYNSLALSADGK                                  | 308 | 18 | 5 | 16.16 | b4y2y11y14y18                    | 1897.94 | 66.461  | 30698 | 2 | 949.47  | 10.23  |
| Q8ZPD6 YNCE_SALTY Uncharacterized protein yncE | 2  |                                           | QAGQVSVIDAK                                         | 291 | 11 | 5 | 28.09 | b6*b6y3y4y11                     | 1115.60 | 38.205  | 21581 | 2 | 558.30  | -6.35  |
| Q8ZPD6 YNCE_SALTY Uncharacterized protein yncE | 3  |                                           | LLDDGKEHFFINLSLDTAGHR                               | 223 | 21 | 3 | 14.38 | b7y6y20                          | 2398.22 | 76.703  | 5144  | 3 | 800.08  | 2.24   |
| Q8ZPD6 YNCE_SALTY Uncharacterized protein yncE | 4  |                                           | LYTTNADGEFITIDTASNK                                 | 198 | 19 | 3 | 15.49 | b6b12y8                          | 2074.00 | 104.047 | 2078  | 2 | 1037.51 | 2.94   |
| Q8ZPD6 YNCE_SALTY Uncharacterized protein yncE | 5  |                                           | ESAIWVVDGETIK                                       | 162 | 13 | 3 | 30.6  | b7b9b12                          | 1446.72 | 76.907  | 19696 | 2 | 723.86  | -21.35 |
| Q8ZPD6 YNCE_SALTY Uncharacterized protein yncE | 6  |                                           | LVL DAR                                             | 126 | 6  | 1 | 13.91 | b3                               | 686.41  | 52.538  | 13293 | 1 | 686.41  | -9.43  |
| Q8ZPD6 YNCE_SALTY Uncharacterized protein yncE | 7  |                                           | MSTGLALDSK                                          | 185 | 10 | 3 | 27.71 | b4y3y9                           | 1022.51 | 67.149  | 5116  | 2 | 511.76  | -11.70 |
| Q8ZPD6 YNCE_SALTY Uncharacterized protein yncE | 8  |                                           | LDPVTLEITQAIHNDLKPFGATINA<br>ATQTLWFGNTINS AVTAIDAK | 73  | 46 | 4 | 21.74 | b5y3y4y10                        | 4894.53 | 128.321 | 4993  | 4 | 1224.39 | -7.58  |
| Q8ZPD6 YNCE_SALTY Uncharacterized protein yncE | 9  |                                           | IAAPASLAVLFNPTR                                     | 268 | 15 | 4 | 24.83 | b3y4y5*y5                        | 1540.88 | 90.521  | 4963  | 2 | 770.94  | -2.77  |
| Q8ZPD6 YNCE_SALTY Uncharacterized protein yncE | 10 |                                           | LLDDGK                                              | 223 | 6  | 2 | 30.45 | b3b5                             | 660.36  | 34.516  | 4545  | 1 | 660.36  | 7.02   |
| Q8ZPD6 YNCE_SALTY Uncharacterized protein yncE | 11 |                                           | GAYEMAWSQQENALWLATSQSR                              | 41  | 22 | 5 | 25.01 | b3y5*y5y6y9                      | 2527.21 | 85.129  | 3736  | 2 | 1264.11 | 16.71  |
| Q8ZPD6 YNCE_SALTY Uncharacterized protein yncE | 12 |                                           | IAAPASLAVLFNPTRNEAYVTHR                             | 268 | 23 | 9 | 62.53 | y6y11*y11*y11y12y15y16y<br>18y20 | 2511.31 | 82.880  | 87942 | 4 | 628.58  | -12.93 |
| Q8ZPD6 YNCE_SALTY Uncharacterized protein yncE | 13 |                                           | LLDDGKEHFFINLSLDTAGHR                               | 223 | 21 | 3 | 21.02 | b5b7b10                          | 2398.18 | 66.118  | 19196 | 3 | 800.07  | -12.83 |
| Q8ZPD6 YNCE_SALTY Uncharacterized protein yncE | 14 |                                           | NEAYVTHRQAGQVSVIDAK                                 | 283 | 19 | 3 | 15.49 | b5b9y3                           | 2086.08 | 65.206  | 8399  | 3 | 696.03  | 5.62   |
| Q8ZPD6 YNCE_SALTY Uncharacterized protein yncE | 15 |                                           | AQRLYTTNADGEFITIDTASNK                              | 195 | 22 | 4 | 21.65 | b8b11b15y11                      | 2429.22 | 88.285  | 3790  | 3 | 810.41  | 12.16  |
| Q8ZPD6 YNCE_SALTY Uncharacterized protein yncE | 16 |                                           | STREQEATQPDDVIR                                     | 335 | 15 | 3 | 18.81 | b7y5y10                          | 1744.82 | 74.516  | 3353  | 3 | 582.28  | -13.57 |
| Q8ZPD6 YNCE_SALTY Uncharacterized protein yncE | 17 | Phosphoryl STY(12)                        | ELVADAATNTIYISGVGKESAIWV<br>VDGETIK                 | 144 | 31 | 5 | 35.98 | b9b10*b10b11y6                   | 3329.67 | 68.463  | 56605 | 4 | 833.17  | 8.65   |
| Q8ZPD6 YNCE_SALTY Uncharacterized protein yncE | 18 |                                           | LLDDGKEHFFINLSLDTAGH                                | 223 | 20 | 3 | 12.88 | y8*y8y11                         | 2242.11 | 76.758  | 35012 | 2 | 1121.56 | -3.05  |
| P65554 RPPH_SALTY RNA pyrophohydrolyase        | 1  |                                           | VMKEFASVVMALQDNPPK                                  | 146 | 18 | 5 | 53.99 | y5y7y8y9y10                      | 2004.05 | 72.894  | 8287  | 3 | 668.69  | 10.90  |
| P65554 RPPH_SALTY RNA pyrophohydrolyase        | 2  | Carbamidomethyl+C(15)                     | IDDDGYRPNVGIVICNR                                   | 1   | 17 | 3 | 23.92 | b11b12y13                        | 1975.96 | 89.270  | 1579  | 2 | 988.48  | -3.95  |



|                                             |   |                       |                                |     |    |   |       |                      |         |         |       |   |         |       |
|---------------------------------------------|---|-----------------------|--------------------------------|-----|----|---|-------|----------------------|---------|---------|-------|---|---------|-------|
| P65554 RPPH_SALTY RNA<br>pyrophohohydrolase | 3 |                       | QGQVMWAR                       | 18  | 8  | 4 | 41.73 | y3y4y6*y6            | 975.47  | 37.341  | 7885  | 2 | 488.24  | -9.45 |
| P65554 RPPH_SALTY RNA<br>pyrophohohydrolase | 4 | Carbamidomethyl+C(7)  | WDTKPVCIGQK                    | 85  | 11 | 3 | 25.08 | b4b9y8               | 1331.68 | 65.238  | 1941  | 2 | 666.35  | 4.77  |
| P65554 RPPH_SALTY RNA<br>pyrophohohydrolase | 5 | Carbamidomethyl+C(15) | IDDDGYRPNVGIVICNRQGQVMW<br>AR  | 1   | 25 | 3 | 19.02 | y4y9y20              | 2932.44 | 65.281  | 17628 | 4 | 733.87  | 4.58  |
| P65554 RPPH_SALTY RNA<br>pyrophohohydrolase | 6 | Carbamidomethyl+C(16) | MIDDDGYRPNVGIVICNRQGQVM<br>WAR | 0   | 26 | 3 | 12.5  | b13y4y7              | 3063.45 | 133.410 | 9251  | 4 | 766.62  | -8.21 |
| P65554 RPPH_SALTY RNA<br>pyrophohohydrolase | 7 |                       | RFGQHSWQFPQGGINPGESAEQA<br>MYR | 26  | 26 | 4 | 23.48 | b11y3y4y12           | 2978.38 | 129.174 | 1645  | 2 | 1489.69 | 0.49  |
| P65554 RPPH_SALTY RNA<br>pyrophohohydrolase | 8 | Oxidation+M(2)        | VMKEFASVVMALQDNPPK             | 146 | 18 | 7 | 42.34 | b4b14y3y12y13*y13y15 | 2020.04 | 84.976  | 2334  | 2 | 1010.52 | 6.89  |
