# Supplementary material for: Phenotypic profile linked to inhibition of the major Zn influx system in Salmonella enterica : proteomics and ionomics investigations
Source: Royal Society of Chemistry journal article supplement (doi:10.1039/c0mb00140f), 2010-10-20
Supplement: c0mb00140f.zip [file c0mb00140f.zip]

## MA6926 LC-MS run 1: 6926\_220709\_1a2\_01

| Accession | Description                                                          | mW (Da) | pI (pH) | PLGS Score | Peptides | Theoretical Peptides | Coverage (%) | Precursor RMS Mass Error (ppm) | Products | Modified Peptides | Products RMS Mass Error (ppm) | Products RMS RT Error (min) |
|-----------|----------------------------------------------------------------------|---------|---------|------------|----------|----------------------|--------------|--------------------------------|----------|-------------------|-------------------------------|-----------------------------|
| P0A2R4    | DNA directed RNA polymerase subunit beta                             | 155136  | 6.41    | 933.97     | 40       | 119                  | 43.50        | 10.51                          | 196      | 5                 | 24.91                         | 0.028                       |
| P0A1H3    | Elongation factor G                                                  | 77550   | 5.00    | 1592.45    | 37       | 47                   | 72.59        | 9.07                           | 335      | 3                 | 19.48                         | 0.025                       |
| Q9L6N1    | 5 methyltetrahydropteroyltriglutamate homocysteine methyltransferase | 84615   | 5.67    | 840.11     | 32       | 60                   | 51.99        | 9.30                           | 212      | 3                 | 19.89                         | 0.026                       |
| P41031    | Thiosulfate binding protein                                          | 37559   | 9.19    | 1328.42    | 31       | 32                   | 81.36        | 7.95                           | 270      | 0                 | 16.20                         | 0.024                       |
| P06202    | Periplasmic oligopeptide binding protein                             | 61254   | 6.03    | 1297.60    | 31       | 42                   | 79.01        | 7.64                           | 298      | 1                 | 18.92                         | 0.027                       |
| P0A1D3    | 60 kDa chaperonin                                                    | 57249   | 4.65    | 1736.10    | 31       | 44                   | 68.25        | 9.00                           | 354      | 5                 | 17.93                         | 0.025                       |
| P66932    | Trigger factor                                                       | 48036   | 4.64    | 781.14     | 30       | 43                   | 63.89        | 9.60                           | 165      | 2                 | 18.85                         | 0.029                       |
| P64076    | Enolase                                                              | 45570   | 5.08    | 1813.48    | 30       | 34                   | 77.55        | 9.24                           | 345      | 1                 | 18.27                         | 0.025                       |
| Q7CPE1    | ATP synthase subunit alpha                                           | 55078   | 5.61    | 988.57     | 28       | 40                   | 71.35        | 9.60                           | 243      | 3                 | 20.67                         | 0.026                       |
| P0A1P6    | Glutamine synthetase                                                 | 51752   | 5.25    | 944.64     | 28       | 33                   | 79.53        | 10.48                          | 209      | 2                 | 21.01                         | 0.026                       |
| Q7CPE2    | ATP synthase subunit beta                                            | 50251   | 4.71    | 1027.95    | 28       | 32                   | 72.61        | 9.45                           | 199      | 1                 | 17.81                         | 0.026                       |
| P0A1E3    | Cysteine synthase A                                                  | 34514   | 5.72    | 1222.86    | 25       | 20                   | 80.19        | 7.70                           | 256      | 3                 | 19.67                         | 0.024                       |
| P52616    | Phase 2 flagellin                                                    | 52504   | 4.55    | 795.53     | 25       | 37                   | 72.13        | 10.29                          | 198      | 3                 | 20.75                         | 0.025                       |
| Q7CQ01    | Chaperone protein clpB                                               | 95377   | 5.15    | 605.21     | 25       | 65                   | 47.37        | 8.40                           | 147      | 7                 | 23.28                         | 0.029                       |
| P0A1H5    | Elongation factor Tu                                                 | 43256   | 5.15    | 2221.17    | 25       | 30                   | 82.23        | 9.19                           | 394      | 1                 | 15.82                         | 0.022                       |
| P65702    | Phosphoglycerate kinase                                              | 41106   | 4.90    | 1527.46    | 24       | 30                   | 75.97        | 7.61                           | 244      | 0                 | 18.53                         | 0.024                       |
| Q8ZQT5    | Protein tolB                                                         | 46120   | 8.73    | 609.01     | 23       | 21                   | 62.56        | 8.98                           | 141      | 0                 | 20.34                         | 0.026                       |
| P55900    | Phosphoserine aminotransferase                                       | 39806   | 5.17    | 358.91     | 23       | 28                   | 68.78        | 8.90                           | 107      | 0                 | 22.56                         | 0.025                       |
| Q7CPK0    | sn glycerol 3 phosphate binding periplasmic protein ugpB             | 48362   | 7.33    | 632.04     | 23       | 38                   | 67.12        | 10.48                          | 142      | 4                 | 20.33                         | 0.028                       |
| P05989    | Ketol acid reductoisomerase                                          | 53907   | 4.96    | 622.75     | 22       | 47                   | 63.34        | 7.53                           | 164      | 4                 | 22.46                         | 0.028                       |
| Q8ZLT3    | Polyribonucleotide nucleotidyltransferase                            | 76990   | 4.86    | 414.73     | 22       | 51                   | 47.68        | 12.50                          | 112      | 3                 | 24.18                         | 0.029                       |
| P37412    | 3 isopropylmalate dehydrogenase                                      | 39488   | 5.14    | 356.58     | 22       | 25                   | 66.12        | 9.03                           | 114      | 1                 | 24.33                         | 0.031                       |
| P64052    | Elongation factor Ts                                                 | 30338   | 4.95    | 680.36     | 22       | 33                   | 80.57        | 10.20                          | 169      | 3                 | 17.29                         | 0.026                       |
| P0A1P0    | Glyceraldehyde 3 phosphate dehydrogenase                             | 35564   | 6.36    | 1212.90    | 21       | 29                   | 72.21        | 9.87                           | 258      | 0                 | 16.54                         | 0.022                       |
| Q9ZF60    | Glutamate aspartate periplasmic binding protein                      | 33381   | 9.16    | 1211.58    | 21       | 21                   | 75.17        | 8.97                           | 200      | 2                 | 17.10                         | 0.024                       |
| P06179    | Flagellin                                                            | 51581   | 4.60    | 1074.49    | 21       | 36                   | 68.08        | 8.63                           | 236      | 3                 | 18.99                         | 0.027                       |
| Q7CR87    | Chaperone surA                                                       | 47221   | 6.88    | 606.78     | 21       | 31                   | 67.29        | 7.44                           | 137      | 0                 | 17.44                         | 0.027                       |
| P40720    | Fumarate hydratase class I aerobic                                   | 63784   | 7.48    | 546.44     | 21       | 51                   | 40.69        | 9.11                           | 97       | 3                 | 21.76                         | 0.026                       |
| P25077    | Malate dehydrogenase                                                 | 32455   | 5.97    | 1221.40    | 21       | 22                   | 71.79        | 9.04                           | 217      | 1                 | 15.61                         | 0.023                       |
| O33921    | Glucose 1 phosphatase                                                | 45530   | 6.64    | 742.70     | 20       | 25                   | 74.82        | 10.50                          | 184      | 1                 | 17.89                         | 0.022                       |
| P00924    | Enolase 1                                                            | 46773   | 6.15    | 732.09     | 20       | 28                   | 48.05        | 9.58                           | 156      | 2                 | 20.62                         | 0.026                       |
| Q56073    | Chaperone protein dnaK                                               | 69215   | 4.64    | 662.18     | 20       | 59                   | 49.84        | 8.92                           | 141      | 2                 | 22.02                         | 0.026                       |
| Q8ZQM3    | Glutathione binding protein gsiB                                     | 56502   | 8.98    | 547.59     | 20       | 40                   | 59.77        | 7.85                           | 128      | 1                 | 20.21                         | 0.027                       |
| Q8ZKQ1    | Autoinducer 2 binding protein lsrB                                   | 36736   | 6.53    | 929.78     | 20       | 22                   | 71.47        | 10.23                          | 180      | 1                 | 18.84                         | 0.025                       |
| P0A7Z7    | DNA directed RNA polymerase subunit alpha                            | 36489   | 4.78    | 484.89     | 19       | 28                   | 78.42        | 11.35                          | 125      | 1                 | 20.81                         | 0.025                       |
| Q8ZQU3    | Succinate dehydrogenase flavoprotein subunit                         | 64421   | 5.88    | 429.73     | 19       | 44                   | 45.58        | 8.79                           | 94       | 1                 | 22.18                         | 0.029                       |
| P51066    | Isocitrate lyase                                                     | 47532   | 5.06    | 411.91     | 19       | 29                   | 61.75        | 9.27                           | 83       | 1                 | 22.02                         | 0.030                       |
| P14845    | Carbamoyl phosphate synthase small chain                             | 41625   | 6.00    | 395.26     | 19       | 27                   | 68.06        | 12.16                          | 99       | 0                 | 22.69                         | 0.025                       |
| Q8ZPS5    | UPF0061 protein ydiU                                                 | 54906   | 5.67    | 303.73     | 19       | 39                   | 46.46        | 10.97                          | 107      | 5                 | 21.20                         | 0.028                       |
| P23905    | D galactose binding periplasmic protein                              | 35791   | 5.75    | 622.31     | 19       | 30                   | 62.05        | 8.18                           | 143      | 4                 | 19.11                         | 0.027                       |
| P14062    | 6 phosphogluconate dehydrogenase decarboxylating                     | 51363   | 5.04    | 609.41     | 18       | 38                   | 60.47        | 9.06                           | 111      | 3                 | 21.26                         | 0.028                       |
| P66869    | Succinyl CoA ligase ADP forming subunit beta                         | 41454   | 5.12    | 535.48     | 18       | 39                   | 67.27        | 8.97                           | 104      | 2                 | 21.98                         | 0.028                       |
| Q8ZL56    | 2 3 bisphosphoglycerate independent phosphoglycerate mutase          | 56219   | 4.88    | 416.55     | 18       | 37                   | 55.84        | 8.21                           | 101      | 1                 | 23.50                         | 0.028                       |

|        |                                                                    |       |       |         |    |    |       |       |     |   |       |       |
|--------|--------------------------------------------------------------------|-------|-------|---------|----|----|-------|-------|-----|---|-------|-------|
| P11003 | 5 10 methylenetetrahydrofolate reductase                           | 33151 | 6.44  | 340.16  | 18 | 30 | 67.91 | 10.11 | 95  | 2 | 23.04 | 0.031 |
| P65215 | 2 dehydro 3 deoxyphosphooctonate aldolase                          | 30775 | 5.86  | 325.17  | 18 | 25 | 73.24 | 10.38 | 104 | 5 | 25.21 | 0.029 |
| P02906 | Sulfate binding protein                                            | 36517 | 7.72  | 662.92  | 18 | 28 | 68.69 | 10.73 | 148 | 0 | 23.00 | 0.026 |
| P0A1W6 | Leucine specific binding protein                                   | 39375 | 5.84  | 625.19  | 17 | 27 | 65.04 | 9.38  | 143 | 2 | 21.00 | 0.024 |
| P41033 | Phosphoenolpyruvate carboxykinase ATP                              | 59539 | 5.58  | 528.77  | 17 | 45 | 50.19 | 7.14  | 116 | 2 | 20.64 | 0.027 |
| P66764 | S adenosylmethionine synthetase                                    | 41926 | 4.91  | 469.47  | 17 | 32 | 71.35 | 8.63  | 124 | 2 | 20.45 | 0.028 |
| Q8ZP20 | Periplasmic trehalase                                              | 63469 | 5.15  | 448.32  | 17 | 44 | 41.05 | 8.74  | 99  | 4 | 20.84 | 0.026 |
| P0A269 | Exopolyposphatase                                                  | 58108 | 7.80  | 402.69  | 17 | 38 | 48.15 | 9.81  | 76  | 2 | 25.30 | 0.031 |
| P15717 | 3 isopropylmalate dehydratase large subunit 1                      | 49754 | 5.92  | 321.97  | 17 | 27 | 55.15 | 7.06  | 93  | 0 | 26.21 | 0.028 |
| Q8ZPD6 | Uncharacterized protein yncE                                       | 38480 | 9.55  | 274.32  | 17 | 27 | 73.37 | 7.90  | 79  | 2 | 23.08 | 0.030 |
| O68883 | Citrate synthase                                                   | 48074 | 6.26  | 631.11  | 17 | 33 | 59.95 | 8.10  | 129 | 1 | 19.89 | 0.027 |
| P02910 | Histidine binding periplasmic protein                              | 28361 | 5.95  | 848.76  | 16 | 23 | 66.92 | 8.10  | 153 | 1 | 17.63 | 0.024 |
| P26982 | Protease do                                                        | 49284 | 9.19  | 684.07  | 16 | 29 | 49.89 | 10.80 | 153 | 1 | 18.36 | 0.025 |
| P0A2E1 | Serine hydroxymethyltransferase                                    | 45426 | 6.02  | 471.24  | 16 | 36 | 59.47 | 9.13  | 114 | 2 | 20.12 | 0.028 |
| P58661 | Aspartate aminotransferase                                         | 43494 | 5.29  | 354.35  | 16 | 34 | 52.78 | 9.57  | 84  | 0 | 23.84 | 0.029 |
| P0A1V6 | Ribose phosphate pyrophosphokinase                                 | 34194 | 5.06  | 249.97  | 16 | 19 | 58.41 | 10.55 | 75  | 2 | 22.04 | 0.030 |
| P17215 | Leu Ile Val Thr binding protein                                    | 38762 | 5.69  | 1254.58 | 16 | 21 | 78.90 | 8.34  | 241 | 1 | 17.52 | 0.022 |
| Q8ZRP4 | 2 3 4 5 tetrahydropyridine 2 6 dicarboxylate N succinyltransferase | 29833 | 5.39  | 435.99  | 15 | 25 | 76.64 | 8.09  | 94  | 1 | 21.29 | 0.028 |
| P60446 | 50S ribosomal protein L3                                           | 22233 | 10.25 | 402.63  | 15 | 20 | 63.64 | 9.72  | 97  | 0 | 19.61 | 0.025 |
| P02911 | Lysine arginine ornithine binding periplasmic protein              | 28182 | 5.90  | 374.60  | 15 | 23 | 65.38 | 8.35  | 87  | 1 | 20.94 | 0.027 |
| P0A2C5 | D ribose binding periplasmic protein                               | 30943 | 9.20  | 505.46  | 15 | 25 | 64.53 | 8.30  | 110 | 1 | 19.82 | 0.024 |
| P65882 | Adenylosuccinate synthetase                                        | 47347 | 5.15  | 426.71  | 14 | 42 | 53.01 | 6.94  | 92  | 3 | 21.15 | 0.027 |
| P0A249 | Phosphoenolpyruvate protein phosphotransferase                     | 63328 | 4.56  | 400.16  | 14 | 51 | 46.78 | 12.54 | 101 | 4 | 25.62 | 0.029 |
| P0A297 | 50S ribosomal protein L10                                          | 17789 | 9.46  | 374.37  | 14 | 15 | 76.36 | 9.10  | 93  | 4 | 19.80 | 0.029 |
| P66955 | Transaldolase B                                                    | 35149 | 4.91  | 352.89  | 14 | 26 | 53.31 | 9.71  | 69  | 0 | 19.91 | 0.027 |
| P65889 | Phosphoribosylaminoimidazole succinocarboxamide synthase           | 26890 | 5.02  | 339.50  | 14 | 19 | 54.43 | 8.20  | 95  | 1 | 20.06 | 0.026 |
| P67912 | ADP L glycerol D mannose 6 epimerase                               | 34827 | 4.72  | 464.66  | 14 | 33 | 51.29 | 8.57  | 74  | 1 | 23.77 | 0.027 |
| P0A2A3 | 50S ribosomal protein L1                                           | 24713 | 10.10 | 585.47  | 13 | 19 | 60.26 | 7.84  | 110 | 2 | 18.19 | 0.023 |
| P0A7W4 | 30S ribosomal protein S5                                           | 17592 | 10.56 | 565.04  | 13 | 13 | 70.06 | 9.46  | 112 | 3 | 15.57 | 0.026 |
| P66313 | 50S ribosomal protein L6                                           | 18848 | 10.09 | 488.32  | 13 | 13 | 76.27 | 9.30  | 91  | 0 | 19.54 | 0.023 |
| P26976 | Non specific acid phosphatase                                      | 28364 | 9.22  | 331.54  | 13 | 19 | 58.80 | 10.08 | 77  | 1 | 19.97 | 0.028 |
| P0A251 | Alkyl hydroperoxide reductase subunit C                            | 20734 | 4.85  | 633.48  | 13 | 16 | 82.35 | 9.33  | 108 | 0 | 17.65 | 0.026 |
| P02936 | Outer membrane protein A                                           | 37491 | 5.50  | 518.86  | 12 | 25 | 49.14 | 8.49  | 94  | 1 | 18.71 | 0.022 |
| Q8ZK80 | 50S ribosomal protein L9                                           | 15774 | 7.73  | 498.65  | 12 | 14 | 68.46 | 9.80  | 91  | 2 | 19.02 | 0.025 |
| Q8ZQD4 | Outer membrane lipoprotein carrier protein                         | 22467 | 7.39  | 395.45  | 12 | 17 | 88.18 | 9.25  | 103 | 3 | 18.57 | 0.025 |
| O54297 | 30S ribosomal protein S4                                           | 23470 | 10.38 | 374.51  | 12 | 19 | 54.85 | 8.92  | 68  | 0 | 22.61 | 0.026 |
| Q8ZRN1 | D methionine binding lipoprotein metQ                              | 29417 | 5.23  | 343.30  | 12 | 30 | 50.92 | 9.68  | 74  | 3 | 22.46 | 0.028 |
| P24900 | DNA replication and repair protein recF                            | 40488 | 6.87  | 281.82  | 12 | 26 | 57.70 | 11.68 | 67  | 3 | 21.47 | 0.029 |
| P00929 | Tryptophan synthase alpha chain                                    | 28652 | 5.29  | 216.74  | 12 | 19 | 80.22 | 8.54  | 57  | 0 | 22.85 | 0.027 |
| Q9L4T0 | S ribosylhomocysteine lyase                                        | 19295 | 5.68  | 210.48  | 12 | 15 | 78.36 | 12.38 | 78  | 4 | 23.49 | 0.025 |
| Q7CR64 | UPF0325 protein yaeH                                               | 15084 | 7.17  | 155.66  | 12 | 11 | 75.78 | 8.03  | 48  | 0 | 20.79 | 0.025 |
| P0A1S2 | DNA binding protein H NS                                           | 15532 | 5.09  | 620.01  | 12 | 14 | 78.10 | 9.01  | 164 | 2 | 15.10 | 0.022 |
| P63411 | Acetate kinase                                                     | 43230 | 5.91  | 498.49  | 11 | 25 | 49.75 | 9.92  | 86  | 1 | 20.59 | 0.025 |
| P0A1V4 | Adenylate kinase                                                   | 23473 | 5.39  | 360.32  | 11 | 24 | 57.01 | 7.84  | 77  | 1 | 19.95 | 0.025 |
| P65692 | 6 phosphofructokinase                                              | 34892 | 5.47  | 345.63  | 11 | 28 | 53.44 | 12.48 | 78  | 3 | 21.54 | 0.028 |
| Q8ZRC9 | UPF0234 protein yajQ                                               | 18307 | 5.42  | 333.04  | 11 | 14 | 71.78 | 9.20  | 72  | 1 | 19.21 | 0.027 |
| Q8ZKP7 | Triosephosphate isomerase                                          | 26899 | 5.61  | 331.47  | 11 | 22 | 75.69 | 9.99  | 98  | 0 | 19.88 | 0.023 |
| Q7CQV9 | DNA protection during starvation protein                           | 18705 | 5.66  | 287.80  | 11 | 18 | 69.46 | 8.81  | 63  | 0 | 20.17 | 0.028 |

|        |                                                             |       |       |        |    |    |       |       |     |   |       |       |
|--------|-------------------------------------------------------------|-------|-------|--------|----|----|-------|-------|-----|---|-------|-------|
| P0A2B3 | 30S ribosomal protein S7                                    | 17579 | 10.73 | 213.50 | 11 | 10 | 70.51 | 9.37  | 75  | 0 | 19.05 | 0.026 |
| Q8ZP65 | Probable thiol peroxidase                                   | 18014 | 4.74  | 566.63 | 11 | 12 | 95.83 | 6.51  | 144 | 1 | 18.56 | 0.024 |
| P0A2M5 | Uracil phosphoribosyltransferase                            | 22518 | 5.17  | 345.99 | 10 | 16 | 64.90 | 9.19  | 74  | 1 | 17.99 | 0.021 |
| P0A7X0 | 30S ribosomal protein S8                                    | 14117 | 9.85  | 268.39 | 10 | 12 | 76.15 | 8.55  | 53  | 0 | 19.65 | 0.024 |
| P67091 | Universal stress protein F                                  | 15704 | 5.92  | 512.90 | 10 | 11 | 87.50 | 8.53  | 96  | 0 | 18.64 | 0.024 |
| P0A283 | Glucose specific phosphotransferase enzyme IIA component    | 18235 | 4.54  | 541.00 | 9  | 12 | 66.27 | 9.31  | 125 | 0 | 18.51 | 0.021 |
| P67904 | 30S ribosomal protein S10                                   | 11759 | 10.33 | 472.94 | 9  | 11 | 53.40 | 10.62 | 77  | 0 | 20.61 | 0.022 |
| P0A1Z2 | Chaperone protein skp                                       | 17894 | 10.25 | 451.78 | 9  | 10 | 58.39 | 9.36  | 105 | 1 | 16.73 | 0.023 |
| Q7CQ05 | Autonomous glycyl radical cofactor                          | 14335 | 4.92  | 327.47 | 9  | 15 | 66.14 | 9.60  | 99  | 0 | 16.66 | 0.024 |
| P67093 | Universal stress protein G                                  | 15891 | 6.20  | 249.18 | 9  | 9  | 88.73 | 9.60  | 79  | 2 | 18.96 | 0.024 |
| P0A7V6 | 30S ribosomal protein S3                                    | 25967 | 10.72 | 233.71 | 9  | 20 | 50.21 | 10.92 | 47  | 0 | 21.67 | 0.025 |
| P0A2D1 | Oxidoreductase ucpA                                         | 27852 | 4.86  | 179.93 | 9  | 20 | 29.66 | 7.19  | 39  | 0 | 24.92 | 0.033 |
| P66593 | 30S ribosomal protein S6                                    | 15163 | 5.08  | 667.51 | 9  | 9  | 67.94 | 9.76  | 128 | 0 | 17.41 | 0.024 |
| Q7CPE5 | ATP synthase subunit delta                                  | 19399 | 4.69  | 273.48 | 8  | 13 | 54.80 | 12.44 | 62  | 0 | 22.63 | 0.026 |
| P0A2C7 | Spermidine putrescine binding periplasmic protein           | 38996 | 4.99  | 269.26 | 8  | 28 | 47.99 | 8.22  | 41  | 0 | 27.18 | 0.030 |
| P66738 | Ribosome recycling factor                                   | 20542 | 8.60  | 266.66 | 8  | 16 | 54.59 | 6.34  | 63  | 2 | 19.08 | 0.028 |
| Q8ZLD7 | Universal stress protein A                                  | 16070 | 4.92  | 251.48 | 8  | 9  | 86.81 | 7.43  | 61  | 0 | 17.21 | 0.023 |
| Q8ZQ40 | Flavoprotein wrbA                                           | 20854 | 5.74  | 229.45 | 8  | 12 | 79.29 | 5.34  | 47  | 0 | 23.51 | 0.023 |
| Q8ZRM2 | Hydroxyacylglutathione hydrolase                            | 28614 | 6.32  | 133.47 | 8  | 16 | 47.41 | 11.58 | 43  | 1 | 21.73 | 0.030 |
| P0A2T6 | Catabolite gene activator                                   | 23641 | 8.44  | 127.33 | 8  | 22 | 49.52 | 12.94 | 48  | 2 | 23.95 | 0.027 |
| P66541 | 30S ribosomal protein S2                                    | 26741 | 6.73  | 286.04 | 8  | 23 | 58.92 | 7.83  | 59  | 1 | 19.84 | 0.030 |
| P66038 | 6 7 dimethyl 8 ribityllumazine synthase                     | 15998 | 4.91  | 537.89 | 7  | 8  | 61.54 | 10.90 | 86  | 0 | 16.70 | 0.023 |
| P0A7K0 | 50S ribosomal protein L11                                   | 14865 | 10.09 | 298.37 | 7  | 11 | 68.31 | 10.73 | 49  | 1 | 18.12 | 0.022 |
| Q8ZQS2 | 2 3 bisphosphoglycerate dependent phosphoglycerate mutase   | 28475 | 5.71  | 289.29 | 7  | 19 | 37.20 | 9.59  | 46  | 1 | 19.40 | 0.025 |
| P0A9Y9 | Cold shock like protein cspC                                | 7397  | 7.70  | 271.01 | 7  | 5  | 92.75 | 8.45  | 45  | 0 | 19.20 | 0.024 |
| P69936 | NADP dependent L serine L allo threonine dehydrogenase ydfG | 27025 | 5.78  | 253.69 | 7  | 19 | 56.85 | 8.63  | 35  | 0 | 19.50 | 0.027 |
| P20753 | Peptidyl prolyl cis trans isomerase A                       | 20319 | 9.59  | 221.40 | 7  | 15 | 63.16 | 10.15 | 54  | 0 | 16.66 | 0.027 |
| P0A1G5 | DnaK suppressor protein                                     | 17504 | 4.87  | 204.34 | 7  | 12 | 63.58 | 7.95  | 37  | 0 | 17.43 | 0.026 |
| P0A1P8 | Glutaredoxin 1                                              | 9917  | 5.54  | 201.42 | 7  | 10 | 88.51 | 11.60 | 42  | 0 | 20.56 | 0.025 |
| P53636 | Superoxide dismutase Cu Zn 1                                | 18358 | 6.55  | 147.06 | 7  | 10 | 75.71 | 10.35 | 75  | 0 | 21.08 | 0.025 |
| P58627 | Maf like protein yceF                                       | 21479 | 5.84  | 145.44 | 7  | 16 | 53.61 | 11.30 | 35  | 0 | 19.68 | 0.031 |
| P61179 | 50S ribosomal protein L22                                   | 12218 | 10.71 | 143.98 | 7  | 8  | 59.09 | 9.79  | 36  | 1 | 18.82 | 0.033 |
| P0A2H9 | Thiol disulfide interchange protein dsbA                    | 22896 | 5.55  | 562.79 | 7  | 14 | 55.56 | 8.67  | 94  | 1 | 19.44 | 0.025 |
| P0A1D5 | 10 kDa chaperonin                                           | 10311 | 5.19  | 581.58 | 6  | 7  | 56.70 | 7.71  | 88  | 0 | 15.79 | 0.022 |
| P66692 | Ribose 5 phosphate isomerase A                              | 22881 | 4.89  | 470.49 | 6  | 15 | 49.77 | 8.21  | 85  | 2 | 18.47 | 0.026 |
| P0AA28 | Thioredoxin 1                                               | 11799 | 4.47  | 419.90 | 6  | 8  | 55.05 | 9.73  | 77  | 1 | 17.51 | 0.024 |
| Q7CQ71 | 50S ribosomal protein L25                                   | 10534 | 9.94  | 255.67 | 6  | 8  | 69.15 | 5.77  | 54  | 0 | 20.44 | 0.023 |
| Q7CPH8 | Protein export protein secB                                 | 17234 | 4.06  | 232.72 | 6  | 12 | 65.16 | 13.10 | 48  | 0 | 21.52 | 0.025 |
| P0A1B7 | ATP synthase epsilon chain                                  | 15054 | 5.82  | 174.02 | 6  | 7  | 53.96 | 7.32  | 38  | 2 | 20.03 | 0.029 |
| P63601 | Shikimate kinase 1                                          | 19458 | 5.08  | 121.21 | 6  | 14 | 52.60 | 7.22  | 30  | 1 | 24.68 | 0.029 |
| O68926 | Bacterioferritin                                            | 18343 | 4.42  | 115.88 | 6  | 15 | 51.90 | 10.75 | 27  | 1 | 23.88 | 0.031 |
| P0A1R6 | DNA binding protein HU alpha                                | 9515  | 10.12 | 717.89 | 6  | 7  | 64.44 | 3.76  | 101 | 0 | 19.02 | 0.019 |
| P0A2F0 | RNA polymerase sigma E factor                               | 21698 | 5.20  | 231.93 | 5  | 17 | 55.50 | 5.24  | 45  | 2 | 20.69 | 0.026 |
| Q7CPL4 | 50S ribosomal protein L16                                   | 15184 | 11.65 | 230.39 | 5  | 6  | 36.76 | 9.34  | 34  | 1 | 18.34 | 0.022 |
| Q7CPB2 | UPF0337 protein yjbJ                                        | 8454  | 7.16  | 167.96 | 5  | 11 | 60.00 | 8.71  | 18  | 0 | 20.41 | 0.027 |
| P63727 | Soluble cytochrome b562                                     | 13903 | 9.10  | 167.74 | 5  | 9  | 29.69 | 7.81  | 33  | 0 | 19.40 | 0.025 |
| P0A1S4 | DNA binding protein stpA                                    | 15477 | 9.24  | 148.99 | 5  | 12 | 55.64 | 7.02  | 35  | 1 | 19.78 | 0.024 |
| P0A9Z4 | Nitrogen regulatory protein P II 1                          | 12417 | 4.98  | 133.70 | 5  | 8  | 42.86 | 8.08  | 29  | 0 | 25.60 | 0.031 |

|        |                                     |       |       |        |   |    |       |       |    |   |       |       |
|--------|-------------------------------------|-------|-------|--------|---|----|-------|-------|----|---|-------|-------|
| Q7CQ70 | UPF0352 protein yejL                | 8226  | 5.31  | 110.08 | 5 | 4  | 56.00 | 7.54  | 33 | 0 | 20.03 | 0.027 |
| P0A299 | 50S ribosomal protein L7 L12        | 12291 | 4.40  | 417.15 | 5 | 20 | 55.37 | 9.33  | 60 | 3 | 19.10 | 0.025 |
| P0A2F6 | Single stranded DNA binding protein | 19062 | 5.29  | 166.79 | 4 | 11 | 31.82 | 10.51 | 31 | 0 | 18.84 | 0.033 |
| Q8ZK81 | 30S ribosomal protein S18           | 9065  | 11.11 | 118.37 | 4 | 4  | 48.00 | 11.48 | 23 | 0 | 22.27 | 0.027 |
| P0A2A7 | 50S ribosomal protein L30           | 6509  | 11.41 | 91.58  | 4 | 6  | 71.19 | 10.59 | 19 | 0 | 17.82 | 0.025 |
| Q8ZKP1 | Cell division protein zapB          | 9306  | 4.38  | 348.58 | 4 | 13 | 59.49 | 7.00  | 39 | 0 | 17.27 | 0.027 |
| P66643 | 30S ribosomal protein S9            | 14817 | 11.34 | 145.64 | 3 | 14 | 23.08 | 6.77  | 14 | 0 | 20.35 | 0.027 |
| Q7CQN4 | Major outer membrane lipoprotein I  | 8386  | 9.82  | 138.65 | 3 | 6  | 48.72 | 8.00  | 26 | 0 | 15.01 | 0.024 |
| P66451 | 30S ribosomal protein S17           | 9716  | 10.08 | 119.29 | 3 | 4  | 39.29 | 11.70 | 19 | 0 | 16.38 | 0.017 |
| Q8ZLM1 | 30S ribosomal protein S13           | 13153 | 11.22 | 146.93 | 3 | 12 | 15.25 | 6.73  | 21 | 0 | 15.81 | 0.027 |
| P0A6B1 | Acyl carrier protein                | 8634  | 3.75  | 126.04 | 2 | 4  | 32.05 | 12.68 | 19 | 0 | 12.75 | 0.025 |

| MA6926 LC-MS run 2: 6926_220709_1a2_02 |                                                                      |         |         |            |          |                      |              |                                |          |                   |                               |                             |
|----------------------------------------|----------------------------------------------------------------------|---------|---------|------------|----------|----------------------|--------------|--------------------------------|----------|-------------------|-------------------------------|-----------------------------|
| Accession                              | Description                                                          | mW (Da) | pI (pH) | PLGS Score | Peptides | Theoretical Peptides | Coverage (%) | Precursor RMS Mass Error (ppm) | Products | Modified Peptides | Products RMS Mass Error (ppm) | Products RMS RT Error (min) |
| P0A2R4                                 | DNA directed RNA polymerase subunit beta                             | 155136  | 6.41    | 769.73     | 39       | 119                  | 45.06        | 10.43                          | 199      | 6                 | 26.32                         | 0.031                       |
| P0A1D3                                 | 60 kDa chaperonin                                                    | 57249   | 4.65    | 1861.83    | 33       | 44                   | 77.01        | 9.11                           | 372      | 4                 | 18.81                         | 0.026                       |
| P64076                                 | Enolase                                                              | 45570   | 5.08    | 1562.70    | 32       | 34                   | 80.56        | 9.48                           | 325      | 0                 | 18.71                         | 0.025                       |
| P0A1H3                                 | Elongation factor G                                                  | 77550   | 5.00    | 1185.69    | 30       | 47                   | 64.63        | 6.28                           | 232      | 2                 | 19.76                         | 0.025                       |
| P52616                                 | Phase 2 flagellin                                                    | 52504   | 4.55    | 665.20     | 29       | 37                   | 67.79        | 9.60                           | 194      | 0                 | 21.21                         | 0.028                       |
| P06202                                 | Periplasmic oligopeptide binding protein                             | 61254   | 6.03    | 1046.33    | 29       | 42                   | 64.27        | 9.08                           | 240      | 0                 | 16.96                         | 0.028                       |
| P40720                                 | Fumarate hydratase class I aerobic                                   | 63784   | 7.48    | 444.44     | 28       | 51                   | 61.55        | 9.10                           | 142      | 2                 | 24.07                         | 0.032                       |
| P0A1H5                                 | Elongation factor Tu                                                 | 43256   | 5.15    | 1815.10    | 28       | 30                   | 81.73        | 9.77                           | 360      | 3                 | 15.65                         | 0.024                       |
| Q9L6N1                                 | 5 methyltetrahydropteroyltriglutamate homocysteine methyltransferase | 84615   | 5.67    | 626.03     | 25       | 60                   | 44.43        | 9.08                           | 148      | 1                 | 19.39                         | 0.027                       |
| P66932                                 | Trigger factor                                                       | 48036   | 4.64    | 592.61     | 24       | 43                   | 44.68        | 9.95                           | 135      | 1                 | 22.14                         | 0.029                       |
| Q7CPE1                                 | ATP synthase subunit alpha                                           | 55078   | 5.61    | 697.02     | 24       | 40                   | 64.72        | 8.52                           | 169      | 1                 | 19.90                         | 0.027                       |
| Q8ZRP0                                 | Outer membrane protein assembly factor yaeT                          | 89471   | 4.80    | 460.85     | 23       | 58                   | 36.19        | 8.44                           | 121      | 1                 | 23.07                         | 0.031                       |
| P41031                                 | Thiosulfate binding protein                                          | 37559   | 9.19    | 1221.15    | 23       | 32                   | 68.34        | 7.07                           | 248      | 2                 | 16.65                         | 0.026                       |
| P0A1P6                                 | Glutamine synthetase                                                 | 51752   | 5.25    | 685.47     | 22       | 33                   | 71.43        | 7.29                           | 146      | 2                 | 19.97                         | 0.028                       |
| Q8ZQU3                                 | Succinate dehydrogenase flavoprotein subunit                         | 64421   | 5.88    | 528.14     | 22       | 44                   | 48.98        | 10.22                          | 132      | 4                 | 24.12                         | 0.026                       |
| Q7CPE2                                 | ATP synthase subunit beta                                            | 50251   | 4.71    | 690.92     | 22       | 32                   | 69.13        | 9.81                           | 161      | 2                 | 19.53                         | 0.028                       |
| O33921                                 | Glucose 1 phosphatase                                                | 45530   | 6.64    | 685.63     | 21       | 25                   | 79.66        | 9.00                           | 188      | 2                 | 17.72                         | 0.028                       |
| P64052                                 | Elongation factor Ts                                                 | 30338   | 4.95    | 669.25     | 21       | 33                   | 69.61        | 9.52                           | 134      | 2                 | 17.94                         | 0.027                       |
| Q56073                                 | Chaperone protein dnaK                                               | 69215   | 4.64    | 590.11     | 21       | 59                   | 48.43        | 9.94                           | 110      | 2                 | 22.15                         | 0.028                       |
| Q7CR87                                 | Chaperone surA                                                       | 47221   | 6.88    | 485.08     | 21       | 31                   | 70.79        | 6.88                           | 123      | 0                 | 20.55                         | 0.029                       |
| P65702                                 | Phosphoglycerate kinase                                              | 41106   | 4.90    | 1344.65    | 21       | 30                   | 72.61        | 6.28                           | 208      | 0                 | 18.10                         | 0.024                       |
| P26982                                 | Protease do                                                          | 49284   | 9.19    | 565.12     | 20       | 29                   | 56.63        | 8.15                           | 143      | 0                 | 18.55                         | 0.026                       |
| P25077                                 | Malate dehydrogenase                                                 | 32455   | 5.97    | 1250.96    | 19       | 22                   | 86.22        | 6.90                           | 226      | 2                 | 18.15                         | 0.025                       |
| P0A1E3                                 | Cysteine synthase A                                                  | 34514   | 5.72    | 1022.17    | 19       | 20                   | 70.90        | 5.42                           | 176      | 0                 | 18.08                         | 0.026                       |
| P00924                                 | Enolase 1                                                            | 46773   | 6.15    | 582.36     | 19       | 28                   | 46.00        | 10.37                          | 131      | 3                 | 19.07                         | 0.027                       |
| Q7CPK0                                 | sn glycerol 3 phosphate binding periplasmic protein ugpB             | 48362   | 7.33    | 516.95     | 19       | 38                   | 57.31        | 7.64                           | 100      | 0                 | 22.01                         | 0.028                       |
| P41033                                 | Phosphoenolpyruvate carboxykinase ATP                                | 59539   | 5.58    | 497.24     | 19       | 45                   | 63.57        | 9.44                           | 127      | 2                 | 24.12                         | 0.031                       |
| P0A2E1                                 | Serine hydroxymethyltransferase                                      | 45426   | 6.02    | 398.55     | 19       | 36                   | 50.60        | 9.11                           | 111      | 3                 | 21.32                         | 0.027                       |
| P0A1P0                                 | Glyceraldehyde 3 phosphate dehydrogenase                             | 35564   | 6.36    | 1284.61    | 19       | 29                   | 75.53        | 9.70                           | 250      | 1                 | 18.18                         | 0.024                       |
| Q8ZKQ1                                 | Autoinducer 2 binding protein lsrB                                   | 36736   | 6.53    | 751.73     | 18       | 22                   | 63.82        | 9.43                           | 144      | 0                 | 20.84                         | 0.027                       |

|        |                                                                    |       |       |         |    |    |       |       |     |   |       |       |
|--------|--------------------------------------------------------------------|-------|-------|---------|----|----|-------|-------|-----|---|-------|-------|
| Q8ZQT5 | Protein tolB                                                       | 46120 | 8.73  | 542.54  | 18 | 21 | 51.40 | 8.87  | 130 | 1 | 19.03 | 0.028 |
| P05989 | Ketol acid reductoisomerase                                        | 53907 | 4.96  | 463.20  | 18 | 47 | 52.14 | 7.43  | 132 | 4 | 23.09 | 0.029 |
| P55900 | Phosphoserine aminotransferase                                     | 39806 | 5.17  | 429.72  | 18 | 28 | 58.56 | 8.19  | 115 | 2 | 21.07 | 0.030 |
| Q8ZP20 | Periplasmic trehalase                                              | 63469 | 5.15  | 411.98  | 18 | 44 | 49.47 | 9.07  | 129 | 3 | 21.74 | 0.028 |
| Q8ZL56 | 2 3 bisphosphoglycerate independent phosphoglycerate mutase        | 56219 | 4.88  | 341.01  | 18 | 37 | 55.84 | 8.99  | 82  | 1 | 27.14 | 0.027 |
| P06179 | Flagellin                                                          | 51581 | 4.60  | 806.71  | 18 | 36 | 52.53 | 8.92  | 163 | 0 | 18.78 | 0.027 |
| Q8ZQM3 | Glutathione binding protein gsiB                                   | 56502 | 8.98  | 444.30  | 17 | 40 | 43.75 | 8.06  | 79  | 0 | 21.05 | 0.028 |
| P02906 | Sulfate binding protein                                            | 36517 | 7.72  | 430.34  | 17 | 28 | 73.56 | 10.68 | 99  | 1 | 21.08 | 0.028 |
| P65882 | Adenylosuccinate synthetase                                        | 47347 | 5.15  | 427.67  | 17 | 42 | 52.31 | 7.77  | 117 | 2 | 20.01 | 0.026 |
| P58661 | Aspartate aminotransferase                                         | 43494 | 5.29  | 310.49  | 17 | 34 | 51.52 | 8.75  | 93  | 0 | 23.85 | 0.029 |
| Q8ZPD6 | Uncharacterized protein yncE                                       | 38480 | 9.55  | 282.82  | 17 | 27 | 51.27 | 9.70  | 80  | 2 | 20.62 | 0.031 |
| P0A1F8 | Aspartate semialdehyde dehydrogenase                               | 40110 | 5.21  | 262.02  | 17 | 27 | 75.82 | 8.18  | 94  | 4 | 22.99 | 0.029 |
| P14062 | 6 phosphogluconate dehydrogenase decarboxylating                   | 51363 | 5.04  | 548.20  | 17 | 38 | 61.32 | 7.67  | 101 | 3 | 21.57 | 0.026 |
| P23905 | D galactose binding periplasmic protein                            | 35791 | 5.75  | 611.46  | 16 | 30 | 58.13 | 10.41 | 122 | 1 | 19.33 | 0.028 |
| Q9ZF60 | Glutamate aspartate periplasmic binding protein                    | 33381 | 9.16  | 948.26  | 16 | 21 | 68.21 | 8.25  | 164 | 4 | 19.46 | 0.028 |
| P0A2B3 | 30S ribosomal protein S7                                           | 17579 | 10.73 | 231.24  | 15 | 10 | 83.33 | 9.99  | 85  | 0 | 19.49 | 0.028 |
| P17215 | Leu Ile Val Thr binding protein                                    | 38762 | 5.69  | 1097.61 | 15 | 21 | 76.16 | 7.48  | 248 | 5 | 18.44 | 0.026 |
| P0A1V4 | Adenylate kinase                                                   | 23473 | 5.39  | 408.48  | 14 | 24 | 49.53 | 9.47  | 100 | 0 | 19.73 | 0.029 |
| P0A297 | 50S ribosomal protein L10                                          | 17789 | 9.46  | 396.79  | 14 | 15 | 75.15 | 8.31  | 107 | 3 | 19.82 | 0.029 |
| O68883 | Citrate synthase                                                   | 48074 | 6.26  | 382.28  | 14 | 33 | 56.21 | 8.56  | 81  | 2 | 21.05 | 0.029 |
| P66869 | Succinyl CoA ligase ADP forming subunit beta                       | 41454 | 5.12  | 353.47  | 14 | 39 | 62.63 | 9.08  | 90  | 2 | 18.97 | 0.030 |
| P0A1W6 | Leucine specific binding protein                                   | 39375 | 5.84  | 348.49  | 14 | 27 | 65.04 | 10.03 | 101 | 2 | 20.82 | 0.028 |
| P77983 | Pyruvate kinase I                                                  | 50625 | 5.53  | 323.94  | 14 | 33 | 44.68 | 8.66  | 86  | 1 | 23.71 | 0.029 |
| P60446 | 50S ribosomal protein L3                                           | 22233 | 10.25 | 279.70  | 14 | 20 | 63.16 | 8.70  | 80  | 2 | 19.56 | 0.030 |
| Q8ZNV1 | tRNA mo5U34 methyltransferase                                      | 37087 | 5.66  | 218.29  | 14 | 29 | 68.73 | 10.03 | 72  | 2 | 26.09 | 0.032 |
| P63411 | Acetate kinase                                                     | 43230 | 5.91  | 457.49  | 14 | 25 | 50.75 | 10.85 | 98  | 2 | 23.16 | 0.030 |
| P0A2C5 | D ribose binding periplasmic protein                               | 30943 | 9.20  | 542.18  | 13 | 25 | 54.73 | 7.21  | 121 | 3 | 19.66 | 0.027 |
| P66955 | Transaldolase B                                                    | 35149 | 4.91  | 382.40  | 13 | 26 | 57.10 | 8.19  | 77  | 2 | 23.85 | 0.032 |
| P15717 | 3 isopropylmalate dehydratase large subunit I                      | 49754 | 5.92  | 254.65  | 13 | 27 | 40.56 | 8.13  | 59  | 0 | 21.66 | 0.030 |
| P14146 | Virulence transcriptional regulatory protein phoP                  | 25617 | 5.14  | 205.84  | 13 | 21 | 73.21 | 9.67  | 78  | 2 | 21.99 | 0.028 |
| P02910 | Histidine binding periplasmic protein                              | 28361 | 5.95  | 689.84  | 13 | 23 | 66.92 | 7.15  | 140 | 3 | 19.16 | 0.028 |
| Q7CQ05 | Autonomous glycyl radical cofactor                                 | 14335 | 4.92  | 352.06  | 12 | 15 | 80.32 | 8.76  | 114 | 0 | 17.44 | 0.023 |
| P0A7Z7 | DNA directed RNA polymerase subunit alpha                          | 36489 | 4.78  | 328.76  | 12 | 28 | 55.32 | 8.90  | 70  | 0 | 20.48 | 0.027 |
| P02911 | Lysine arginine ornithine binding periplasmic protein              | 28182 | 5.90  | 269.25  | 12 | 23 | 51.92 | 10.23 | 56  | 1 | 20.46 | 0.031 |
| P37412 | 3 isopropylmalate dehydrogenase                                    | 39488 | 5.14  | 267.98  | 12 | 25 | 47.66 | 12.18 | 63  | 1 | 24.38 | 0.031 |
| P0A2C7 | Spermidine putrescine binding periplasmic protein                  | 38996 | 4.99  | 259.46  | 12 | 28 | 63.22 | 10.57 | 58  | 0 | 22.63 | 0.028 |
| P02936 | Outer membrane protein A                                           | 37491 | 5.50  | 368.72  | 12 | 25 | 44.29 | 9.37  | 74  | 1 | 18.43 | 0.030 |
| Q8ZK80 | 50S ribosomal protein L9                                           | 15774 | 7.73  | 514.24  | 11 | 14 | 73.15 | 11.24 | 91  | 1 | 21.09 | 0.029 |
| Q8ZP65 | Probable thiol peroxidase                                          | 18014 | 4.74  | 457.75  | 11 | 12 | 80.95 | 6.46  | 110 | 1 | 16.70 | 0.023 |
| Q8ZRN1 | D methionine binding lipoprotein metQ                              | 29417 | 5.23  | 377.95  | 11 | 30 | 52.40 | 8.17  | 65  | 2 | 25.10 | 0.029 |
| Q8ZKP7 | Triosephosphate isomerase                                          | 26899 | 5.61  | 335.51  | 11 | 22 | 62.75 | 7.76  | 121 | 1 | 17.28 | 0.024 |
| Q8ZRP4 | 2 3 4 5 tetrahydropyridine 2 6 dicarboxylate N succinyltransferase | 29833 | 5.39  | 318.93  | 11 | 25 | 57.66 | 8.62  | 64  | 1 | 24.51 | 0.028 |
| P66764 | S adenosylmethionine synthetase                                    | 41926 | 4.91  | 269.37  | 11 | 32 | 57.55 | 10.57 | 66  | 2 | 22.34 | 0.030 |
| P26976 | Non specific acid phosphatase                                      | 28364 | 9.22  | 186.66  | 11 | 19 | 46.80 | 9.51  | 48  | 0 | 22.44 | 0.030 |
| P0A7W4 | 30S ribosomal protein S5                                           | 17592 | 10.56 | 577.88  | 11 | 13 | 69.46 | 9.25  | 98  | 1 | 15.38 | 0.023 |
| P0A1A5 | Branched chain amino acid aminotransferase                         | 34031 | 5.47  | 273.07  | 10 | 26 | 43.69 | 8.79  | 52  | 1 | 26.02 | 0.029 |
| Q9L4T0 | S ribosylhomocysteine lyase                                        | 19295 | 5.68  | 257.97  | 10 | 15 | 74.27 | 9.71  | 78  | 4 | 21.09 | 0.029 |
| P16657 | Enoyl acyl carrier protein reductase NADH                          | 27742 | 5.47  | 255.03  | 10 | 21 | 49.62 | 10.09 | 58  | 0 | 23.83 | 0.032 |

|        |                                                             |       |       |        |    |    |       |       |     |   |       |       |
|--------|-------------------------------------------------------------|-------|-------|--------|----|----|-------|-------|-----|---|-------|-------|
| Q8ZJV7 | Purine nucleoside phosphorylase deoD type                   | 25961 | 5.45  | 236.46 | 10 | 23 | 47.28 | 8.23  | 43  | 1 | 20.68 | 0.032 |
| Q9ZFU6 | Uncharacterized protein ypfL                                | 48359 | 4.45  | 224.38 | 10 | 25 | 32.24 | 12.02 | 38  | 0 | 25.20 | 0.031 |
| P65215 | 2 dehydro 3 deoxyphosphooctonate aldolase                   | 30775 | 5.86  | 295.82 | 10 | 25 | 54.23 | 10.22 | 70  | 4 | 20.11 | 0.032 |
| P0A2A3 | 50S ribosomal protein L1                                    | 24713 | 10.10 | 483.58 | 9  | 19 | 55.13 | 9.50  | 77  | 0 | 17.30 | 0.025 |
| P0A251 | Alkyl hydroperoxide reductase subunit C                     | 20734 | 4.85  | 449.61 | 9  | 16 | 74.87 | 9.93  | 77  | 0 | 18.85 | 0.027 |
| P66593 | 30S ribosomal protein S6                                    | 15163 | 5.08  | 444.47 | 9  | 9  | 67.94 | 7.38  | 74  | 0 | 18.33 | 0.026 |
| P66313 | 50S ribosomal protein L6                                    | 18848 | 10.09 | 422.54 | 9  | 13 | 67.23 | 8.49  | 62  | 0 | 21.47 | 0.024 |
| P0A1S0 | Integration host factor subunit alpha                       | 11360 | 9.88  | 241.02 | 9  | 13 | 61.62 | 7.51  | 52  | 0 | 20.75 | 0.030 |
| P66541 | 30S ribosomal protein S2                                    | 26741 | 6.73  | 235.27 | 9  | 23 | 53.11 | 9.07  | 58  | 2 | 21.96 | 0.028 |
| Q8ZNA5 | Long chain fatty acid transport protein                     | 47445 | 4.72  | 227.40 | 9  | 20 | 37.24 | 5.54  | 37  | 0 | 21.74 | 0.032 |
| P65933 | Uridylate kinase                                            | 25938 | 7.26  | 224.32 | 9  | 23 | 51.04 | 8.77  | 41  | 1 | 24.79 | 0.031 |
| P0A7V6 | 30S ribosomal protein S3                                    | 25967 | 10.72 | 178.59 | 9  | 20 | 47.64 | 10.72 | 49  | 1 | 18.49 | 0.029 |
| P0A8B8 | UPF0133 protein ybaB                                        | 12006 | 4.82  | 174.06 | 9  | 11 | 93.58 | 7.66  | 49  | 1 | 22.08 | 0.033 |
| P0A2F4 | Superoxide dismutase Fe                                     | 21294 | 5.52  | 113.76 | 9  | 14 | 71.50 | 11.72 | 56  | 1 | 21.09 | 0.033 |
| P0A1S2 | DNA binding protein H NS                                    | 15532 | 5.09  | 596.29 | 9  | 14 | 71.53 | 8.80  | 132 | 1 | 14.79 | 0.025 |
| P40783 | Quinone oxidoreductase                                      | 35129 | 6.79  | 261.56 | 8  | 27 | 44.04 | 10.51 | 48  | 3 | 22.41 | 0.030 |
| P67093 | Universal stress protein G                                  | 15891 | 6.20  | 245.58 | 8  | 9  | 75.35 | 9.76  | 49  | 0 | 21.58 | 0.026 |
| P0A1V6 | Ribose phosphate pyrophosphokinase                          | 34194 | 5.06  | 225.41 | 8  | 19 | 43.17 | 9.61  | 48  | 2 | 25.14 | 0.033 |
| P62405 | 50S ribosomal protein L5                                    | 20304 | 9.76  | 218.55 | 8  | 14 | 59.22 | 7.27  | 43  | 1 | 19.56 | 0.030 |
| P04787 | 3 isopropylmalate dehydratase small subunit I               | 22492 | 4.89  | 113.05 | 8  | 11 | 56.72 | 8.75  | 43  | 0 | 21.61 | 0.027 |
| Q7CQV9 | DNA protection during starvation protein                    | 18705 | 5.66  | 284.66 | 8  | 18 | 55.09 | 9.05  | 40  | 0 | 19.60 | 0.029 |
| O54297 | 30S ribosomal protein S4                                    | 23470 | 10.38 | 386.10 | 7  | 19 | 44.66 | 10.98 | 54  | 0 | 18.37 | 0.025 |
| P0A2M5 | Uracil phosphoribosyltransferase                            | 22518 | 5.17  | 308.20 | 7  | 16 | 60.58 | 10.74 | 44  | 1 | 21.01 | 0.026 |
| P22107 | TraT complement resistance protein                          | 26261 | 9.35  | 281.89 | 7  | 18 | 38.27 | 9.79  | 49  | 2 | 17.13 | 0.028 |
| Q8ZQD4 | Outer membrane lipoprotein carrier protein                  | 22467 | 7.39  | 273.58 | 7  | 17 | 58.13 | 7.73  | 50  | 1 | 19.32 | 0.029 |
| P69936 | NADP dependent L serine L allo threonine dehydrogenase ydfG | 27025 | 5.78  | 206.44 | 7  | 19 | 60.08 | 8.49  | 47  | 2 | 23.34 | 0.033 |
| Q8ZQ40 | Flavoprotein wrbA                                           | 20854 | 5.74  | 166.18 | 7  | 12 | 71.72 | 6.29  | 61  | 0 | 23.69 | 0.032 |
| P65599 | Oligoribonuclease                                           | 20619 | 4.85  | 156.68 | 7  | 21 | 37.57 | 7.68  | 40  | 1 | 21.54 | 0.031 |
| P58663 | Capsular synthesis regulator component B                    | 23699 | 7.71  | 147.99 | 7  | 19 | 39.81 | 9.89  | 35  | 0 | 24.20 | 0.024 |
| P41784 | Protein prgI                                                | 8851  | 4.56  | 95.01  | 7  | 8  | 86.25 | 10.19 | 37  | 1 | 23.95 | 0.028 |
| P0A283 | Glucose specific phosphotransferase enzyme IIA component    | 18235 | 4.54  | 399.16 | 7  | 12 | 57.99 | 11.35 | 102 | 0 | 16.38 | 0.024 |
| P0A299 | 50S ribosomal protein L7 L12                                | 12291 | 4.40  | 441.86 | 6  | 20 | 52.07 | 6.89  | 68  | 2 | 17.30 | 0.026 |
| P0A2H9 | Thiol disulfide interchange protein dsbA                    | 22896 | 5.55  | 364.19 | 6  | 14 | 43.48 | 10.72 | 76  | 1 | 18.45 | 0.024 |
| P67091 | Universal stress protein F                                  | 15704 | 5.92  | 361.81 | 6  | 11 | 53.47 | 8.00  | 68  | 0 | 17.69 | 0.026 |
| P66692 | Ribose 5 phosphate isomerase A                              | 22881 | 4.89  | 351.95 | 6  | 15 | 42.47 | 7.58  | 52  | 0 | 18.93 | 0.026 |
| P67904 | 30S ribosomal protein S10                                   | 11759 | 10.33 | 321.81 | 6  | 11 | 44.66 | 10.02 | 59  | 0 | 19.44 | 0.022 |
| Q8ZLD7 | Universal stress protein A                                  | 16070 | 4.92  | 228.57 | 6  | 9  | 72.92 | 6.82  | 50  | 0 | 16.32 | 0.031 |
| Q8ZNW0 | Pyruvate kinase II                                          | 51354 | 6.11  | 221.81 | 6  | 34 | 26.46 | 6.89  | 31  | 1 | 21.57 | 0.030 |
| Q8ZRC9 | UPF0234 protein yajQ                                        | 18307 | 5.42  | 219.65 | 6  | 14 | 56.44 | 9.66  | 57  | 2 | 22.84 | 0.027 |
| P0A9Y9 | Cold shock like protein cspC                                | 7397  | 7.70  | 215.66 | 6  | 5  | 78.26 | 7.97  | 45  | 0 | 18.38 | 0.027 |
| P0A7K0 | 50S ribosomal protein L11                                   | 14865 | 10.09 | 208.69 | 6  | 11 | 59.86 | 8.82  | 40  | 0 | 20.55 | 0.025 |
| P00929 | Tryptophan synthase alpha chain                             | 28652 | 5.29  | 206.69 | 6  | 19 | 50.37 | 6.56  | 46  | 3 | 22.09 | 0.027 |
| O54296 | 30S ribosomal protein S11                                   | 13822 | 11.74 | 169.75 | 6  | 9  | 54.26 | 8.82  | 35  | 1 | 23.86 | 0.033 |
| P0A1G5 | DnaK suppressor protein                                     | 17504 | 4.87  | 168.19 | 6  | 12 | 64.24 | 8.50  | 24  | 0 | 21.24 | 0.031 |
| P0A277 | Xanthine phosphoribosyltransferase                          | 16958 | 5.74  | 167.11 | 6  | 11 | 42.11 | 6.56  | 28  | 0 | 21.20 | 0.032 |
| P20753 | Peptidyl prolyl cis trans isomerase A                       | 20319 | 9.59  | 142.94 | 6  | 15 | 55.79 | 8.64  | 45  | 0 | 17.88 | 0.026 |
| Q7CPD8 | UPF0438 protein yifE                                        | 13069 | 6.23  | 137.24 | 6  | 13 | 31.25 | 8.70  | 30  | 0 | 19.46 | 0.031 |
| P66738 | Ribosome recycling factor                                   | 20542 | 8.60  | 137.05 | 6  | 16 | 41.08 | 8.08  | 42  | 2 | 19.48 | 0.034 |

|        |                                         |       |       |        |   |    |       |       |    |   |       |       |
|--------|-----------------------------------------|-------|-------|--------|---|----|-------|-------|----|---|-------|-------|
| P0A212 | DNA gyrase inhibitory protein homolog   | 18050 | 4.28  | 131.64 | 6 | 8  | 65.16 | 9.76  | 29 | 0 | 19.40 | 0.033 |
| P66643 | 30S ribosomal protein S9                | 14817 | 11.34 | 109.07 | 6 | 14 | 45.38 | 11.99 | 25 | 0 | 28.67 | 0.028 |
| P43019 | Superoxide dismutase Mn                 | 23064 | 6.51  | 99.72  | 6 | 15 | 45.63 | 10.53 | 31 | 0 | 19.34 | 0.032 |
| Q8ZK81 | 30S ribosomal protein S18               | 9065  | 11.11 | 82.80  | 6 | 4  | 52.00 | 7.27  | 31 | 0 | 22.67 | 0.031 |
| P64267 | Protein gns                             | 6478  | 6.13  | 76.81  | 6 | 7  | 63.16 | 10.38 | 26 | 1 | 24.00 | 0.031 |
| P66038 | 6 7 dimethyl 8 ribityllumazine synthase | 15998 | 4.91  | 497.11 | 6 | 8  | 54.49 | 9.34  | 72 | 1 | 19.87 | 0.024 |
| P0A1D5 | 10 kDa chaperonin                       | 10311 | 5.19  | 628.68 | 5 | 7  | 71.13 | 6.11  | 89 | 1 | 18.65 | 0.022 |
| P0A1Z2 | Chaperone protein skp                   | 17894 | 10.25 | 385.29 | 5 | 10 | 51.55 | 7.11  | 74 | 1 | 20.00 | 0.025 |
| P0AA28 | Thioredoxin 1                           | 11799 | 4.47  | 382.44 | 5 | 8  | 58.72 | 10.37 | 63 | 1 | 16.77 | 0.024 |
| Q8ZPU5 | NH 3 dependent NAD synthetase           | 30464 | 5.21  | 157.40 | 5 | 22 | 20.73 | 11.64 | 24 | 0 | 25.49 | 0.029 |
| P53636 | Superoxide dismutase Cu Zn 1            | 18358 | 6.55  | 154.39 | 5 | 10 | 43.50 | 10.02 | 57 | 1 | 18.47 | 0.028 |
| O68926 | Bacterioferritin                        | 18343 | 4.42  | 112.56 | 5 | 15 | 53.80 | 9.55  | 24 | 0 | 27.25 | 0.028 |
| Q7CQN4 | Major outer membrane lipoprotein 1      | 8386  | 9.82  | 98.29  | 5 | 6  | 48.72 | 6.85  | 21 | 0 | 19.64 | 0.029 |
| P0A1P8 | Glutaredoxin 1                          | 9917  | 5.54  | 95.77  | 5 | 10 | 52.87 | 7.48  | 28 | 0 | 17.84 | 0.023 |
| P0A1R6 | DNA binding protein HU alpha            | 9515  | 10.12 | 796.38 | 5 | 7  | 65.56 | 7.07  | 98 | 0 | 18.06 | 0.019 |
| P58683 | Class B acid phosphatase                | 26298 | 6.51  | 166.62 | 4 | 14 | 32.49 | 10.39 | 30 | 1 | 21.01 | 0.030 |
| P0A1B7 | ATP synthase epsilon chain              | 15054 | 5.82  | 160.11 | 4 | 7  | 53.24 | 8.04  | 30 | 0 | 20.68 | 0.023 |
| Q9F7A2 | GDP mannose mannosyl hydrolase          | 17638 | 4.80  | 145.95 | 4 | 11 | 31.85 | 9.10  | 22 | 0 | 24.27 | 0.030 |
| P0A2S0 | Leucine responsive regulatory protein   | 18845 | 9.15  | 133.76 | 4 | 14 | 35.37 | 3.74  | 18 | 0 | 17.98 | 0.029 |
| Q7CPP7 | 50S ribosomal protein L21               | 11571 | 10.29 | 101.02 | 4 | 7  | 56.31 | 7.98  | 26 | 1 | 24.39 | 0.034 |
| P0A7X0 | 30S ribosomal protein S8                | 14117 | 9.85  | 202.69 | 4 | 12 | 23.08 | 5.64  | 29 | 0 | 16.91 | 0.024 |
| P0A1S4 | DNA binding protein stpA                | 15477 | 9.24  | 219.83 | 3 | 12 | 35.34 | 7.55  | 36 | 2 | 18.81 | 0.029 |
| Q7CPG1 | Uncharacterized protein yicS            | 10975 | 8.86  | 168.17 | 3 | 8  | 23.71 | 6.04  | 20 | 1 | 19.47 | 0.028 |
| P69226 | Translation initiation factor IF 1      | 8244  | 9.74  | 131.40 | 3 | 5  | 55.56 | 8.57  | 33 | 1 | 21.32 | 0.027 |
| Q9L9J1 | Thiazole biosynthesis protein thiG      | 26837 | 5.08  | 107.12 | 3 | 18 | 21.09 | 11.78 | 15 | 1 | 28.08 | 0.032 |
| P37589 | Signal transduction protein pmrD        | 9742  | 8.74  | 98.03  | 3 | 5  | 51.76 | 9.83  | 29 | 2 | 21.44 | 0.026 |
| P66170 | 50S ribosomal protein L29               | 7255  | 10.52 | 252.45 | 3 | 4  | 55.56 | 10.09 | 51 | 0 | 16.38 | 0.027 |

| MA6926 LC-MS run 3: 6926_220709_1a2_03 |                                                                      |         |         |            |          |                      |              |                                |          |                   |                               |                             |
|----------------------------------------|----------------------------------------------------------------------|---------|---------|------------|----------|----------------------|--------------|--------------------------------|----------|-------------------|-------------------------------|-----------------------------|
| Accession                              | Description                                                          | mW (Da) | pI (pH) | PLGS Score | Peptides | Theoretical Peptides | Coverage (%) | Precursor RMS Mass Error (ppm) | Products | Modified Peptides | Products RMS Mass Error (ppm) | Products RMS RT Error (min) |
| P06173                                 | DNA directed RNA polymerase subunit beta                             | 150506  | 4.96    | 964.27     | 46       | 112                  | 44.78        | 9.73                           | 192      | 1                 | 24.55                         | 0.042                       |
| P0A1D3                                 | 60 kDa chaperonin                                                    | 57249   | 4.65    | 1637.82    | 34       | 44                   | 74.09        | 7.74                           | 319      | 2                 | 16.45                         | 0.033                       |
| P0A1H3                                 | Elongation factor G                                                  | 77550   | 5.00    | 964.76     | 31       | 47                   | 71.73        | 7.90                           | 237      | 3                 | 21.01                         | 0.035                       |
| P06202                                 | Periplasmic oligopeptide binding protein                             | 61254   | 6.03    | 968.61     | 31       | 42                   | 64.46        | 8.79                           | 240      | 0                 | 18.05                         | 0.035                       |
| Q56073                                 | Chaperone protein dnaK                                               | 69215   | 4.64    | 705.48     | 30       | 59                   | 57.99        | 9.72                           | 170      | 1                 | 22.81                         | 0.037                       |
| P06179                                 | Flagellin                                                            | 51581   | 4.60    | 1007.55    | 28       | 36                   | 70.71        | 8.69                           | 243      | 1                 | 20.31                         | 0.033                       |
| P0A1P6                                 | Glutamine synthetase                                                 | 51752   | 5.25    | 572.96     | 26       | 33                   | 75.27        | 8.83                           | 161      | 4                 | 21.49                         | 0.038                       |
| P0A1H5                                 | Elongation factor Tu                                                 | 43256   | 5.15    | 1874.45    | 26       | 30                   | 77.92        | 9.83                           | 347      | 3                 | 14.46                         | 0.028                       |
| Q8ZQZ6                                 | Leucyl tRNA synthetase                                               | 96923   | 5.02    | 488.58     | 24       | 66                   | 44.65        | 11.20                          | 127      | 4                 | 24.19                         | 0.042                       |
| Q7CPE1                                 | ATP synthase subunit alpha                                           | 55078   | 5.61    | 764.94     | 24       | 40                   | 57.70        | 8.01                           | 183      | 2                 | 20.57                         | 0.037                       |
| Q9L6N1                                 | 5 methyltetrahydropteroyltriglutamate homocysteine methyltransferase | 84615   | 5.67    | 600.96     | 23       | 60                   | 43.37        | 8.11                           | 118      | 1                 | 21.16                         | 0.032                       |
| P64076                                 | Enolase                                                              | 45570   | 5.08    | 1224.41    | 23       | 34                   | 75.93        | 8.54                           | 240      | 3                 | 19.04                         | 0.032                       |
| P41031                                 | Thiosulfate binding protein                                          | 37559   | 9.19    | 1131.23    | 22       | 32                   | 77.81        | 5.54                           | 231      | 2                 | 16.07                         | 0.033                       |
| P52616                                 | Phase 2 flagellin                                                    | 52504   | 4.55    | 903.68     | 22       | 37                   | 62.85        | 8.86                           | 188      | 1                 | 21.33                         | 0.035                       |

|        |                                                             |       |       |         |    |    |       |       |     |   |       |       |
|--------|-------------------------------------------------------------|-------|-------|---------|----|----|-------|-------|-----|---|-------|-------|
| P65702 | Phosphoglycerate kinase                                     | 41106 | 4.90  | 1325.22 | 22 | 30 | 74.16 | 7.65  | 228 | 1 | 17.65 | 0.032 |
| Q7CPK0 | sn glycerol 3 phosphate binding periplasmic protein ugpB    | 48362 | 7.33  | 435.13  | 21 | 38 | 65.30 | 9.14  | 103 | 1 | 21.54 | 0.038 |
| P0A2E1 | Serine hydroxymethyltransferase                             | 45426 | 6.02  | 403.15  | 21 | 36 | 56.59 | 9.75  | 124 | 2 | 19.96 | 0.039 |
| P0A1P0 | Glyceraldehyde 3 phosphate dehydrogenase                    | 35564 | 6.36  | 1368.62 | 21 | 29 | 67.98 | 8.03  | 269 | 1 | 18.52 | 0.030 |
| P23905 | D galactose binding periplasmic protein                     | 35791 | 5.75  | 556.09  | 20 | 30 | 66.87 | 8.62  | 124 | 0 | 17.65 | 0.037 |
| P25077 | Malate dehydrogenase                                        | 32455 | 5.97  | 1176.74 | 20 | 22 | 82.05 | 7.35  | 210 | 2 | 17.53 | 0.031 |
| P14062 | 6 phosphogluconate dehydrogenase decarboxylating            | 51363 | 5.04  | 497.12  | 19 | 38 | 73.72 | 8.84  | 119 | 3 | 23.29 | 0.038 |
| Q8ZQM3 | Glutathione binding protein gsiB                            | 56502 | 8.98  | 439.40  | 19 | 40 | 57.23 | 7.85  | 124 | 4 | 20.53 | 0.041 |
| Q8ZP20 | Periplasmic trehalase                                       | 63469 | 5.15  | 436.85  | 19 | 44 | 47.02 | 8.85  | 105 | 1 | 21.50 | 0.038 |
| P05989 | Ketol acid reductoisomerase                                 | 53907 | 4.96  | 401.74  | 19 | 47 | 60.49 | 6.84  | 116 | 6 | 20.33 | 0.040 |
| Q8ZKQ1 | Autoinducer 2 binding protein lsrB                          | 36736 | 6.53  | 733.45  | 19 | 22 | 72.65 | 9.46  | 160 | 1 | 19.21 | 0.034 |
| O33921 | Glucose 1 phosphatase                                       | 45530 | 6.64  | 685.44  | 18 | 25 | 66.59 | 7.93  | 168 | 1 | 17.71 | 0.032 |
| Q7CR87 | Chaperone surA                                              | 47221 | 6.88  | 513.94  | 18 | 31 | 65.65 | 9.27  | 110 | 0 | 19.64 | 0.037 |
| Q8ZL56 | 2 3 bisphosphoglycerate independent phosphoglycerate mutase | 56219 | 4.88  | 406.36  | 18 | 37 | 56.23 | 9.78  | 108 | 3 | 22.80 | 0.036 |
| P00924 | Enolase 1                                                   | 46773 | 6.15  | 714.06  | 18 | 28 | 50.34 | 11.02 | 139 | 4 | 19.29 | 0.033 |
| Q9ZF60 | Glutamate aspartate periplasmic binding protein             | 33381 | 9.16  | 869.47  | 17 | 21 | 61.26 | 8.26  | 189 | 4 | 17.27 | 0.035 |
| P0A1E3 | Cysteine synthase A                                         | 34514 | 5.72  | 791.01  | 17 | 20 | 65.02 | 6.30  | 147 | 1 | 18.27 | 0.031 |
| P26982 | Protease do                                                 | 49284 | 9.19  | 589.41  | 17 | 29 | 46.53 | 9.50  | 144 | 2 | 19.78 | 0.034 |
| P64052 | Elongation factor Ts                                        | 30338 | 4.95  | 555.87  | 17 | 33 | 68.90 | 8.78  | 143 | 6 | 17.83 | 0.037 |
| P65882 | Adenylosuccinate synthetase                                 | 47347 | 5.15  | 424.07  | 17 | 42 | 55.56 | 9.50  | 113 | 6 | 22.51 | 0.039 |
| P17215 | Leu Ile Val Thr binding protein                             | 38762 | 5.69  | 1063.42 | 17 | 21 | 79.73 | 8.63  | 222 | 1 | 17.71 | 0.033 |
| P77983 | Pyruvate kinase I                                           | 50625 | 5.53  | 420.26  | 16 | 33 | 41.91 | 7.62  | 88  | 1 | 19.71 | 0.039 |
| O68883 | Citrate synthase                                            | 48074 | 6.26  | 320.95  | 16 | 33 | 57.14 | 8.83  | 104 | 2 | 20.76 | 0.035 |
| P60446 | 50S ribosomal protein L3                                    | 22233 | 10.25 | 253.35  | 16 | 20 | 65.07 | 9.15  | 77  | 0 | 19.08 | 0.036 |
| P02910 | Histidine binding periplasmic protein                       | 28361 | 5.95  | 688.99  | 16 | 23 | 68.85 | 7.41  | 139 | 1 | 17.41 | 0.032 |
| Q7CPE2 | ATP synthase subunit beta                                   | 50251 | 4.71  | 652.48  | 15 | 32 | 49.78 | 6.01  | 112 | 2 | 17.69 | 0.036 |
| P0A1W6 | Leucine specific binding protein                            | 39375 | 5.84  | 308.58  | 15 | 27 | 53.93 | 10.73 | 77  | 0 | 21.74 | 0.039 |
| P15717 | 3 isopropylmalate dehydratase large subunit 1               | 49754 | 5.92  | 224.64  | 15 | 27 | 45.92 | 11.26 | 77  | 2 | 27.05 | 0.039 |
| P0A7W4 | 30S ribosomal protein S5                                    | 17592 | 10.56 | 699.82  | 15 | 13 | 70.66 | 7.88  | 117 | 1 | 17.57 | 0.032 |
| Q7CQ05 | Autonomous glycyl radical cofactor                          | 14335 | 4.92  | 425.71  | 14 | 15 | 88.98 | 8.93  | 114 | 0 | 14.45 | 0.033 |
| P14845 | Carbamoyl phosphate synthase small chain                    | 41625 | 6.00  | 411.71  | 14 | 27 | 52.88 | 11.24 | 75  | 1 | 23.28 | 0.036 |
| P55900 | Phosphoserine aminotransferase                              | 39806 | 5.17  | 360.93  | 14 | 28 | 50.83 | 6.56  | 86  | 2 | 20.68 | 0.035 |
| P66932 | Trigger factor                                              | 48036 | 4.64  | 561.47  | 14 | 43 | 42.13 | 9.49  | 93  | 2 | 18.73 | 0.037 |
| P02906 | Sulfate binding protein                                     | 36517 | 7.72  | 391.54  | 13 | 28 | 56.23 | 10.84 | 78  | 0 | 23.00 | 0.037 |
| P58661 | Aspartate aminotransferase                                  | 43494 | 5.29  | 317.35  | 13 | 34 | 41.67 | 10.11 | 80  | 0 | 21.93 | 0.042 |
| Q8ZKF5 | Cytochrome c 552                                            | 53782 | 6.43  | 247.90  | 13 | 31 | 36.82 | 9.62  | 64  | 1 | 19.99 | 0.039 |
| P66764 | S adenosylmethionine synthetase                             | 41926 | 4.91  | 240.18  | 13 | 32 | 48.70 | 10.69 | 79  | 2 | 23.07 | 0.039 |
| P02911 | Lysine arginine ornithine binding periplasmic protein       | 28182 | 5.90  | 225.25  | 13 | 23 | 56.54 | 5.41  | 58  | 1 | 21.87 | 0.040 |
| P0A2C5 | D ribose binding periplasmic protein                        | 30943 | 9.20  | 483.06  | 13 | 25 | 55.74 | 7.50  | 96  | 1 | 17.39 | 0.037 |
| P0A297 | 50S ribosomal protein L10                                   | 17789 | 9.46  | 408.84  | 12 | 15 | 64.85 | 7.62  | 77  | 0 | 17.00 | 0.034 |
| P0A2C7 | Spermidine putrescine binding periplasmic protein           | 38996 | 4.99  | 274.68  | 12 | 28 | 45.69 | 9.28  | 55  | 0 | 24.94 | 0.038 |
| Q7CR64 | UPF0325 protein yaeH                                        | 15084 | 7.17  | 212.60  | 12 | 11 | 71.09 | 8.08  | 53  | 0 | 18.59 | 0.037 |
| Q8ZQT5 | Protein tolB                                                | 46120 | 8.73  | 522.77  | 12 | 21 | 40.70 | 8.12  | 96  | 0 | 17.46 | 0.032 |
| P66869 | Succinyl CoA ligase ADP forming subunit beta                | 41454 | 5.12  | 356.09  | 11 | 39 | 42.53 | 8.04  | 73  | 1 | 19.98 | 0.032 |
| P65889 | Phosphoribosylaminoimidazole succinocarboxamide synthase    | 26890 | 5.02  | 263.44  | 11 | 19 | 39.24 | 9.67  | 67  | 1 | 22.27 | 0.036 |
| P65215 | 2 dehydro 3 deoxyphosphooctonate aldolase                   | 30775 | 5.86  | 241.12  | 11 | 25 | 66.55 | 8.47  | 61  | 3 | 19.25 | 0.038 |
| P16657 | Enoyl acyl carrier protein reductase NADH                   | 27742 | 5.47  | 231.51  | 11 | 21 | 53.05 | 7.95  | 64  | 1 | 22.92 | 0.036 |
| P0A2B3 | 30S ribosomal protein S7                                    | 17579 | 10.73 | 213.01  | 11 | 10 | 77.56 | 8.34  | 61  | 0 | 18.26 | 0.035 |



|        |                                                             |       |       |        |    |    |       |       |     |   |       |       |
|--------|-------------------------------------------------------------|-------|-------|--------|----|----|-------|-------|-----|---|-------|-------|
| P63411 | Acetate kinase                                              | 43230 | 5.91  | 537.36 | 11 | 25 | 42.00 | 7.01  | 77  | 1 | 20.17 | 0.034 |
| P0A1S2 | DNA binding protein H NS                                    | 15532 | 5.09  | 545.52 | 10 | 14 | 67.88 | 9.38  | 119 | 1 | 16.48 | 0.035 |
| P0A1V4 | Adenylate kinase                                            | 23473 | 5.39  | 370.26 | 10 | 24 | 56.07 | 10.59 | 83  | 1 | 19.23 | 0.034 |
| P66692 | Ribose 5 phosphate isomerase A                              | 22881 | 4.89  | 327.00 | 10 | 15 | 67.12 | 9.67  | 71  | 1 | 20.70 | 0.035 |
| P69936 | NADP dependent L serine L allo threonine dehydrogenase ydfG | 27025 | 5.78  | 252.07 | 10 | 19 | 71.77 | 10.66 | 67  | 4 | 24.10 | 0.040 |
| P66541 | 30S ribosomal protein S2                                    | 26741 | 6.73  | 226.26 | 10 | 23 | 53.53 | 12.28 | 62  | 1 | 22.64 | 0.034 |
| P60726 | 50S ribosomal protein L4                                    | 22072 | 10.19 | 204.42 | 10 | 18 | 49.25 | 8.69  | 53  | 1 | 20.48 | 0.036 |
| P63351 | Vitamin B12 import ATP binding protein btuD                 | 27092 | 8.82  | 147.04 | 10 | 17 | 63.45 | 10.63 | 54  | 2 | 21.99 | 0.039 |
| P0A251 | Alkyl hydroperoxide reductase subunit C                     | 20734 | 4.85  | 581.22 | 10 | 16 | 76.47 | 8.66  | 80  | 0 | 16.52 | 0.034 |
| P02936 | Outer membrane protein A                                    | 37491 | 5.50  | 306.88 | 9  | 25 | 37.14 | 12.34 | 61  | 0 | 22.31 | 0.036 |
| Q8ZRC9 | UPF0234 protein yajQ                                        | 18307 | 5.42  | 281.94 | 9  | 14 | 60.12 | 7.77  | 59  | 1 | 19.35 | 0.041 |
| P0A1V6 | Ribose phosphate pyrophosphokinase                          | 34194 | 5.06  | 242.35 | 9  | 19 | 44.76 | 7.86  | 49  | 1 | 17.63 | 0.036 |
| P66738 | Ribosome recycling factor                                   | 20542 | 8.60  | 196.98 | 9  | 16 | 55.14 | 8.63  | 61  | 1 | 17.56 | 0.036 |
| O68901 | Superoxide dismutase Cu Zn 2                                | 17726 | 6.04  | 192.26 | 9  | 9  | 91.91 | 9.13  | 92  | 3 | 19.75 | 0.032 |
| P0A2F4 | Superoxide dismutase Fe                                     | 21294 | 5.52  | 191.07 | 9  | 14 | 66.32 | 10.29 | 52  | 0 | 20.24 | 0.041 |
| P0A1Z2 | Chaperone protein skp                                       | 17894 | 10.25 | 451.49 | 9  | 10 | 69.57 | 7.06  | 94  | 1 | 20.72 | 0.031 |
| Q8ZK80 | 50S ribosomal protein L9                                    | 15774 | 7.73  | 527.40 | 8  | 14 | 51.01 | 6.93  | 76  | 0 | 17.96 | 0.033 |
| P15111 | NADP specific glutamate dehydrogenase                       | 48543 | 6.29  | 433.70 | 8  | 38 | 25.95 | 8.39  | 63  | 2 | 19.87 | 0.043 |
| P0A2M5 | Uracil phosphoribosyltransferase                            | 22518 | 5.17  | 305.47 | 8  | 16 | 62.02 | 6.83  | 47  | 0 | 16.88 | 0.035 |
| P0A1A5 | Branched chain amino acid aminotransferase                  | 34031 | 5.47  | 217.80 | 8  | 26 | 34.63 | 8.61  | 56  | 2 | 22.96 | 0.041 |
| Q7CPP7 | 50S ribosomal protein L21                                   | 11571 | 10.29 | 156.18 | 8  | 7  | 75.73 | 9.32  | 46  | 1 | 20.84 | 0.040 |
| Q7CPD8 | UPF0438 protein yifE                                        | 13069 | 6.23  | 116.49 | 8  | 13 | 70.54 | 12.82 | 40  | 0 | 27.73 | 0.039 |
| P0A2A3 | 50S ribosomal protein L1                                    | 24713 | 10.10 | 528.87 | 8  | 19 | 35.90 | 5.87  | 76  | 0 | 16.41 | 0.029 |
| P0A1D5 | 10 kDa chaperonin                                           | 10311 | 5.19  | 531.20 | 7  | 7  | 82.47 | 5.86  | 83  | 1 | 15.37 | 0.030 |
| P0A283 | Glucose specific phosphotransferase enzyme IIA component    | 18235 | 4.54  | 488.94 | 7  | 12 | 57.99 | 10.28 | 94  | 0 | 15.94 | 0.028 |
| Q8ZQD4 | Outer membrane lipoprotein carrier protein                  | 22467 | 7.39  | 332.22 | 7  | 17 | 51.72 | 7.58  | 63  | 1 | 19.11 | 0.040 |
| P67093 | Universal stress protein G                                  | 15891 | 6.20  | 296.58 | 7  | 9  | 87.32 | 9.95  | 63  | 3 | 22.59 | 0.036 |
| P53636 | Superoxide dismutase Cu Zn 1                                | 18358 | 6.55  | 279.27 | 7  | 10 | 46.89 | 9.70  | 59  | 1 | 19.07 | 0.036 |
| Q8ZQ40 | Flavoprotein wrbA                                           | 20854 | 5.74  | 257.95 | 7  | 12 | 71.21 | 6.69  | 57  | 0 | 22.14 | 0.037 |
| P0A9Y9 | Cold shock like protein cspC                                | 7397  | 7.70  | 246.84 | 7  | 5  | 92.75 | 10.04 | 50  | 0 | 19.16 | 0.030 |
| Q7CQV9 | DNA protection during starvation protein                    | 18705 | 5.66  | 225.16 | 7  | 18 | 55.09 | 9.17  | 41  | 0 | 23.47 | 0.040 |
| P62405 | 50S ribosomal protein L5                                    | 20304 | 9.76  | 211.56 | 7  | 14 | 35.20 | 6.97  | 47  | 0 | 18.82 | 0.033 |
| P66593 | 30S ribosomal protein S6                                    | 15163 | 5.08  | 168.83 | 7  | 9  | 56.49 | 10.01 | 40  | 0 | 20.76 | 0.036 |
| P0A1R6 | DNA binding protein HU alpha                                | 9515  | 10.12 | 603.81 | 7  | 7  | 70.00 | 6.34  | 101 | 0 | 15.63 | 0.027 |
| P0A299 | 50S ribosomal protein L7 L12                                | 12291 | 4.40  | 396.36 | 6  | 20 | 48.76 | 9.77  | 63  | 1 | 18.47 | 0.035 |
| P67091 | Universal stress protein F                                  | 15704 | 5.92  | 258.67 | 6  | 11 | 35.42 | 6.17  | 47  | 0 | 18.67 | 0.034 |
| O54297 | 30S ribosomal protein S4                                    | 23470 | 10.38 | 234.10 | 6  | 19 | 34.95 | 9.63  | 46  | 0 | 24.11 | 0.035 |
| P0A7K0 | 50S ribosomal protein L11                                   | 14865 | 10.09 | 223.74 | 6  | 11 | 47.18 | 7.33  | 53  | 1 | 18.99 | 0.034 |
| P0A7X0 | 30S ribosomal protein S8                                    | 14117 | 9.85  | 194.78 | 6  | 12 | 49.23 | 7.61  | 41  | 0 | 18.93 | 0.031 |
| P0A2F6 | Single stranded DNA binding protein                         | 19062 | 5.29  | 190.44 | 6  | 11 | 45.45 | 9.15  | 48  | 2 | 19.17 | 0.039 |
| P0AA07 | Phosphocarrier protein HPr                                  | 9113  | 5.51  | 180.69 | 6  | 7  | 95.29 | 6.88  | 63  | 0 | 13.21 | 0.029 |
| Q9L4T0 | S ribosylhomocysteine lyase                                 | 19295 | 5.68  | 146.36 | 6  | 15 | 49.12 | 9.54  | 30  | 0 | 19.86 | 0.035 |
| O68926 | Bacterioferritin                                            | 18343 | 4.42  | 122.50 | 6  | 15 | 43.04 | 8.97  | 35  | 0 | 22.56 | 0.035 |
| Q7CPZ4 | Protein grpE                                                | 21827 | 4.49  | 111.75 | 6  | 18 | 52.04 | 10.86 | 30  | 0 | 24.39 | 0.036 |
| Q8ZP65 | Probable thiol peroxidase                                   | 18014 | 4.74  | 473.03 | 6  | 12 | 67.86 | 8.60  | 86  | 0 | 17.63 | 0.028 |
| P66038 | 6 7 dimethyl 8 ribityllumazine synthase                     | 15998 | 4.91  | 306.71 | 5  | 8  | 46.79 | 9.20  | 49  | 0 | 18.38 | 0.030 |
| P66313 | 50S ribosomal protein L6                                    | 18848 | 10.09 | 229.03 | 5  | 13 | 36.72 | 4.93  | 37  | 1 | 17.34 | 0.032 |
| P0A7V6 | 30S ribosomal protein S3                                    | 25967 | 10.72 | 182.30 | 5  | 20 | 37.77 | 4.75  | 33  | 0 | 19.88 | 0.035 |

|        |                                          |       |       |        |   |    |       |       |    |   |       |       |
|--------|------------------------------------------|-------|-------|--------|---|----|-------|-------|----|---|-------|-------|
| Q8ZR01 | Rare lipoprotein A                       | 39083 | 7.82  | 132.43 | 5 | 17 | 16.54 | 7.34  | 23 | 0 | 22.78 | 0.040 |
| P67904 | 30S ribosomal protein S10                | 11759 | 10.33 | 356.90 | 5 | 11 | 38.83 | 7.77  | 44 | 0 | 16.94 | 0.027 |
| P0AA28 | Thioredoxin 1                            | 11799 | 4.47  | 384.04 | 4 | 8  | 38.53 | 8.44  | 53 | 1 | 13.06 | 0.031 |
| P66170 | 50S ribosomal protein L29                | 7255  | 10.52 | 251.68 | 4 | 4  | 65.08 | 9.14  | 46 | 0 | 16.33 | 0.037 |
| P0A1S0 | Integration host factor subunit alpha    | 11360 | 9.88  | 190.71 | 4 | 13 | 29.29 | 10.68 | 30 | 0 | 20.48 | 0.036 |
| P0A1B7 | ATP synthase epsilon chain               | 15054 | 5.82  | 189.94 | 4 | 7  | 53.24 | 5.53  | 29 | 0 | 19.06 | 0.039 |
| P0A1R8 | DNA binding protein HU beta              | 9234  | 10.24 | 175.99 | 4 | 9  | 52.22 | 11.37 | 35 | 1 | 16.54 | 0.028 |
| P0A275 | Protein mucA                             | 16516 | 6.24  | 170.07 | 4 | 12 | 34.93 | 6.67  | 26 | 1 | 23.47 | 0.038 |
| Q7CPL4 | 50S ribosomal protein L16                | 15184 | 11.65 | 143.27 | 4 | 6  | 25.00 | 8.44  | 30 | 0 | 20.03 | 0.038 |
| P61179 | 50S ribosomal protein L22                | 12218 | 10.71 | 135.40 | 4 | 8  | 45.45 | 9.05  | 25 | 1 | 21.79 | 0.039 |
| P0A1P8 | Glutaredoxin 1                           | 9917  | 5.54  | 105.55 | 4 | 10 | 48.28 | 9.47  | 24 | 0 | 24.46 | 0.030 |
| P0A2H9 | Thiol disulfide interchange protein dsbA | 22896 | 5.55  | 459.37 | 4 | 14 | 39.61 | 8.00  | 78 | 1 | 16.86 | 0.033 |
| Q7CQN4 | Major outer membrane lipoprotein 1       | 8386  | 9.82  | 137.93 | 3 | 6  | 48.72 | 5.67  | 23 | 1 | 17.81 | 0.039 |

| MA6926 + Zn(II) LC-MS run 1: 6926_Zn_220709_1a2_01 |                                                                      |         |         |            |          |                      |              |                                |          |                   |                               |                             |
|----------------------------------------------------|----------------------------------------------------------------------|---------|---------|------------|----------|----------------------|--------------|--------------------------------|----------|-------------------|-------------------------------|-----------------------------|
| Accession                                          | Description                                                          | mW (Da) | pI (pH) | PLGS Score | Peptides | Theoretical Peptides | Coverage (%) | Precursor RMS Mass Error (ppm) | Products | Modified Peptides | Products RMS Mass Error (ppm) | Products RMS RT Error (min) |
| P0A1H3                                             | Elongation factor G                                                  | 77550   | 5.00    | 814.26     | 37       | 47                   | 74.72        | 8.33                           | 227      | 4                 | 22.05                         | 0.030                       |
| P0A1D3                                             | 60 kDa chaperonin                                                    | 57249   | 4.65    | 1363.05    | 34       | 44                   | 72.81        | 9.94                           | 319      | 5                 | 19.12                         | 0.029                       |
| P0A1H5                                             | Elongation factor Tu                                                 | 43256   | 5.15    | 1725.35    | 32       | 30                   | 86.55        | 10.12                          | 365      | 2                 | 17.49                         | 0.025                       |
| Q9L6N1                                             | 5 methyltetrahydropteroyltriglutamate homocysteine methyltransferase | 84615   | 5.67    | 680.71     | 31       | 60                   | 51.19        | 9.65                           | 168      | 2                 | 21.54                         | 0.028                       |
| P06202                                             | Periplasmic oligopeptide binding protein                             | 61254   | 6.03    | 1307.44    | 30       | 42                   | 65.75        | 8.62                           | 293      | 0                 | 17.01                         | 0.028                       |
| Q7CPE1                                             | ATP synthase subunit alpha                                           | 55078   | 5.61    | 744.85     | 27       | 40                   | 60.23        | 7.73                           | 170      | 1                 | 20.43                         | 0.029                       |
| Q8ZQM3                                             | Glutathione binding protein gsiB                                     | 56502   | 8.98    | 574.98     | 26       | 40                   | 66.99        | 9.71                           | 156      | 3                 | 21.87                         | 0.031                       |
| P52616                                             | Phase 2 flagellin                                                    | 52504   | 4.55    | 673.78     | 26       | 37                   | 67.19        | 9.17                           | 182      | 0                 | 22.38                         | 0.029                       |
| Q7CPK0                                             | sn glycerol 3 phosphate binding periplasmic protein ugpB             | 48362   | 7.33    | 681.14     | 25       | 38                   | 76.71        | 9.88                           | 161      | 1                 | 20.41                         | 0.027                       |
| P41031                                             | Thiosulfate binding protein                                          | 37559   | 9.19    | 1273.06    | 25       | 32                   | 73.67        | 7.81                           | 263      | 0                 | 17.67                         | 0.024                       |
| O33921                                             | Glucose 1 phosphatase                                                | 45530   | 6.64    | 1010.44    | 24       | 25                   | 75.06        | 7.89                           | 237      | 1                 | 17.31                         | 0.024                       |
| P00924                                             | Enolase 1                                                            | 46773   | 6.15    | 683.67     | 24       | 28                   | 53.32        | 9.53                           | 156      | 3                 | 20.64                         | 0.029                       |
| P0A1P6                                             | Glutamine synthetase                                                 | 51752   | 5.25    | 625.96     | 24       | 33                   | 68.23        | 10.00                          | 142      | 1                 | 22.34                         | 0.031                       |
| P64076                                             | Enolase                                                              | 45570   | 5.08    | 1347.64    | 24       | 34                   | 68.29        | 9.25                           | 283      | 2                 | 19.85                         | 0.026                       |
| P06179                                             | Flagellin                                                            | 51581   | 4.60    | 793.54     | 23       | 36                   | 58.99        | 7.43                           | 184      | 3                 | 21.58                         | 0.029                       |
| Q8ZRP0                                             | Outer membrane protein assembly factor yaeT                          | 89471   | 4.80    | 502.83     | 23       | 58                   | 36.19        | 9.49                           | 95       | 1                 | 24.85                         | 0.036                       |
| P65702                                             | Phosphoglycerate kinase                                              | 41106   | 4.90    | 1292.81    | 23       | 30                   | 79.07        | 5.05                           | 215      | 0                 | 20.41                         | 0.025                       |
| P64052                                             | Elongation factor Ts                                                 | 30338   | 4.95    | 609.80     | 22       | 33                   | 64.66        | 10.06                          | 149      | 1                 | 17.65                         | 0.031                       |
| Q8ZQT5                                             | Protein tolB                                                         | 46120   | 8.73    | 600.75     | 22       | 21                   | 71.63        | 9.02                           | 178      | 3                 | 19.36                         | 0.030                       |
| Q56073                                             | Chaperone protein dnaK                                               | 69215   | 4.64    | 567.23     | 22       | 59                   | 60.66        | 10.31                          | 129      | 1                 | 22.55                         | 0.030                       |
| Q8ZKQ1                                             | Autoinducer 2 binding protein lsrB                                   | 36736   | 6.53    | 933.80     | 22       | 22                   | 71.76        | 9.27                           | 192      | 0                 | 18.48                         | 0.027                       |
| P06196                                             | Silent protein ushA 0                                                | 60518   | 5.73    | 584.82     | 21       | 40                   | 62.36        | 10.39                          | 112      | 1                 | 23.02                         | 0.034                       |
| P0A7Z7                                             | DNA directed RNA polymerase subunit alpha                            | 36489   | 4.78    | 391.30     | 21       | 28                   | 62.31        | 7.88                           | 104      | 1                 | 20.27                         | 0.032                       |
| Q8ZP20                                             | Periplasmic trehalase                                                | 63469   | 5.15    | 677.32     | 21       | 44                   | 56.67        | 8.39                           | 148      | 2                 | 21.32                         | 0.029                       |
| P66932                                             | Trigger factor                                                       | 48036   | 4.64    | 568.18     | 20       | 43                   | 46.99        | 8.89                           | 111      | 1                 | 21.28                         | 0.034                       |
| P05989                                             | Ketol acid reductoisomerase                                          | 53907   | 4.96    | 352.00     | 20       | 47                   | 57.84        | 9.68                           | 112      | 2                 | 21.71                         | 0.029                       |
| P25077                                             | Malate dehydrogenase                                                 | 32455   | 5.97    | 1049.24    | 20       | 22                   | 73.08        | 7.28                           | 209      | 2                 | 17.48                         | 0.025                       |
| P0A1E3                                             | Cysteine synthase A                                                  | 34514   | 5.72    | 831.50     | 19       | 20                   | 85.76        | 8.35                           | 165      | 1                 | 19.77                         | 0.027                       |
| Q7CPE2                                             | ATP synthase subunit beta                                            | 50251   | 4.71    | 713.51     | 19       | 32                   | 66.30        | 8.12                           | 149      | 3                 | 18.33                         | 0.030                       |

|        |                                                          |       |       |         |    |    |       |       |     |   |       |       |
|--------|----------------------------------------------------------|-------|-------|---------|----|----|-------|-------|-----|---|-------|-------|
| Q7CR87 | Chaperone surA                                           | 47221 | 6.88  | 590.42  | 19 | 31 | 59.35 | 7.92  | 135 | 1 | 18.22 | 0.026 |
| Q9ZF60 | Glutamate aspartate periplasmic binding protein          | 33381 | 9.16  | 920.69  | 19 | 21 | 66.89 | 9.11  | 182 | 4 | 18.41 | 0.029 |
| P23905 | D galactose binding periplasmic protein                  | 35791 | 5.75  | 649.98  | 18 | 30 | 79.22 | 9.38  | 144 | 1 | 20.63 | 0.030 |
| P0A2C5 | D ribose binding periplasmic protein                     | 30943 | 9.20  | 573.66  | 18 | 25 | 63.18 | 8.50  | 123 | 1 | 17.08 | 0.028 |
| P66764 | S adenosylmethionine synthetase                          | 41926 | 4.91  | 257.89  | 18 | 32 | 78.39 | 9.04  | 84  | 0 | 24.03 | 0.031 |
| P26982 | Protease do                                              | 49284 | 9.19  | 832.75  | 18 | 29 | 52.84 | 7.17  | 166 | 2 | 18.96 | 0.026 |
| P77983 | Pyruvate kinase I                                        | 50625 | 5.53  | 368.82  | 17 | 33 | 56.81 | 8.72  | 90  | 3 | 26.60 | 0.031 |
| P0A7W4 | 30S ribosomal protein S5                                 | 17592 | 10.56 | 638.02  | 17 | 13 | 86.23 | 8.53  | 135 | 2 | 19.69 | 0.028 |
| P17215 | Leu Ile Val Thr binding protein                          | 38762 | 5.69  | 1157.05 | 16 | 21 | 76.16 | 8.30  | 238 | 2 | 16.25 | 0.025 |
| P11003 | 5 10 methylenetetrahydrofolate reductase                 | 33151 | 6.44  | 347.04  | 16 | 30 | 69.59 | 9.81  | 83  | 1 | 25.11 | 0.033 |
| Q8ZPD6 | Uncharacterized protein yncE                             | 38480 | 9.55  | 234.85  | 16 | 27 | 63.74 | 10.58 | 68  | 1 | 22.84 | 0.029 |
| P0A1P0 | Glyceraldehyde 3 phosphate dehydrogenase                 | 35564 | 6.36  | 1237.99 | 16 | 29 | 58.91 | 8.77  | 244 | 0 | 15.52 | 0.021 |
| O68883 | Citrate synthase                                         | 48074 | 6.26  | 370.13  | 15 | 33 | 54.57 | 10.58 | 76  | 0 | 22.67 | 0.031 |
| P55900 | Phosphoserine aminotransferase                           | 39806 | 5.17  | 355.07  | 15 | 28 | 50.28 | 11.25 | 88  | 3 | 20.66 | 0.031 |
| P0A1V4 | Adenylate kinase                                         | 23473 | 5.39  | 243.71  | 15 | 24 | 75.23 | 8.57  | 88  | 1 | 18.44 | 0.029 |
| P02906 | Sulfate binding protein                                  | 36517 | 7.72  | 613.29  | 15 | 28 | 60.49 | 9.24  | 110 | 0 | 19.01 | 0.027 |
| P0A1W6 | Leucine specific binding protein                         | 39375 | 5.84  | 470.11  | 14 | 27 | 59.35 | 10.15 | 106 | 1 | 20.37 | 0.029 |
| P0A2C7 | Spermidine putrescine binding periplasmic protein        | 38996 | 4.99  | 371.53  | 14 | 28 | 63.79 | 8.60  | 86  | 3 | 21.97 | 0.031 |
| P63411 | Acetate kinase                                           | 43230 | 5.91  | 349.48  | 14 | 25 | 54.75 | 8.23  | 68  | 1 | 24.72 | 0.031 |
| P16657 | Enoyl acyl carrier protein reductase NADH                | 27742 | 5.47  | 246.51  | 14 | 21 | 66.41 | 9.66  | 81  | 1 | 21.43 | 0.029 |
| P00929 | Tryptophan synthase alpha chain                          | 28652 | 5.29  | 241.01  | 14 | 19 | 80.22 | 10.45 | 71  | 1 | 23.88 | 0.035 |
| P60446 | 50S ribosomal protein L3                                 | 22233 | 10.25 | 173.88  | 14 | 20 | 65.55 | 7.28  | 60  | 0 | 18.81 | 0.030 |
| P0A1S2 | DNA binding protein H NS                                 | 15532 | 5.09  | 555.90  | 14 | 14 | 76.64 | 9.22  | 159 | 1 | 15.86 | 0.028 |
| Q7CQ05 | Autonomous glycyl radical cofactor                       | 14335 | 4.92  | 381.11  | 13 | 15 | 88.98 | 9.32  | 130 | 0 | 16.85 | 0.027 |
| P02911 | Lysine arginine ornithine binding periplasmic protein    | 28182 | 5.90  | 296.03  | 13 | 23 | 57.69 | 8.44  | 70  | 1 | 22.58 | 0.030 |
| P0A297 | 50S ribosomal protein L10                                | 17789 | 9.46  | 288.87  | 13 | 15 | 72.12 | 9.70  | 76  | 2 | 21.06 | 0.024 |
| Q8ZP84 | Universal stress protein E                               | 35616 | 5.01  | 261.50  | 13 | 23 | 52.38 | 11.42 | 73  | 0 | 23.86 | 0.035 |
| P14062 | 6 phosphogluconate dehydrogenase decarboxylating         | 51363 | 5.04  | 475.24  | 13 | 38 | 42.52 | 7.62  | 74  | 2 | 20.82 | 0.030 |
| P65882 | Adenylosuccinate synthetase                              | 47347 | 5.15  | 492.64  | 12 | 42 | 44.21 | 8.37  | 91  | 6 | 21.21 | 0.032 |
| P0A251 | Alkyl hydroperoxide reductase subunit C                  | 20734 | 4.85  | 440.24  | 12 | 16 | 80.75 | 11.85 | 100 | 1 | 19.16 | 0.029 |
| P26976 | Non specific acid phosphatase                            | 28364 | 9.22  | 352.50  | 12 | 19 | 64.80 | 9.96  | 75  | 0 | 20.02 | 0.030 |
| P66955 | Transaldolase B                                          | 35149 | 4.91  | 288.33  | 12 | 26 | 46.06 | 8.34  | 44  | 0 | 19.58 | 0.030 |
| Q8ZIV7 | Purine nucleoside phosphorylase deoD type                | 25961 | 5.45  | 241.28  | 12 | 23 | 56.90 | 10.63 | 60  | 2 | 23.11 | 0.032 |
| P0A1V6 | Ribose phosphate pyrophosphokinase                       | 34194 | 5.06  | 239.34  | 12 | 19 | 57.46 | 7.61  | 63  | 2 | 24.10 | 0.029 |
| Q8ZJW6 | Ribosomal RNA small subunit methyltransferase C          | 37592 | 6.39  | 185.47  | 12 | 22 | 63.16 | 13.30 | 64  | 3 | 25.66 | 0.034 |
| P02910 | Histidine binding periplasmic protein                    | 28361 | 5.95  | 805.70  | 12 | 23 | 63.85 | 6.95  | 143 | 2 | 19.43 | 0.027 |
| P02936 | Outer membrane protein A                                 | 37491 | 5.50  | 410.45  | 11 | 25 | 36.00 | 12.47 | 64  | 0 | 21.62 | 0.030 |
| P40827 | Lipoprotein nlpD                                         | 39616 | 9.79  | 348.75  | 11 | 19 | 53.05 | 7.42  | 54  | 0 | 20.88 | 0.032 |
| P22107 | TraT complement resistance protein                       | 26261 | 9.35  | 293.07  | 11 | 18 | 50.62 | 5.71  | 72  | 2 | 19.72 | 0.031 |
| P58661 | Aspartate aminotransferase                               | 43494 | 5.29  | 264.40  | 11 | 34 | 40.91 | 10.58 | 55  | 1 | 24.55 | 0.029 |
| P65889 | Phosphoribosylaminoimidazole succinocarboxamide synthase | 26890 | 5.02  | 234.73  | 11 | 19 | 54.43 | 9.04  | 71  | 0 | 20.87 | 0.032 |
| Q8ZRC9 | UPF0234 protein yajQ                                     | 18307 | 5.42  | 203.47  | 11 | 14 | 76.07 | 4.81  | 62  | 1 | 23.35 | 0.033 |
| P0A2N2 | Virulence protein vsdE                                   | 24829 | 6.48  | 196.35  | 11 | 22 | 56.02 | 10.98 | 61  | 1 | 22.77 | 0.030 |
| P66313 | 50S ribosomal protein L6                                 | 18848 | 10.09 | 478.21  | 11 | 13 | 58.76 | 6.96  | 77  | 0 | 18.72 | 0.024 |
| P0A1Z2 | Chaperone protein skp                                    | 17894 | 10.25 | 377.18  | 10 | 10 | 57.76 | 7.78  | 89  | 0 | 17.53 | 0.026 |
| Q7CQV9 | DNA protection during starvation protein                 | 18705 | 5.66  | 318.30  | 10 | 18 | 62.87 | 10.70 | 66  | 0 | 24.45 | 0.030 |
| P67912 | ADP L glycerol D mannose 6 epimerase                     | 34827 | 4.72  | 297.85  | 10 | 33 | 47.42 | 8.47  | 50  | 2 | 24.92 | 0.036 |
| Q8ZQD4 | Outer membrane lipoprotein carrier protein               | 22467 | 7.39  | 225.03  | 10 | 17 | 81.28 | 6.89  | 58  | 0 | 19.80 | 0.028 |

|        |                                                                    |       |       |        |    |    |       |       |     |   |       |       |
|--------|--------------------------------------------------------------------|-------|-------|--------|----|----|-------|-------|-----|---|-------|-------|
| Q8ZR01 | Rare lipoprotein A                                                 | 39083 | 7.82  | 212.47 | 10 | 17 | 38.85 | 6.03  | 52  | 1 | 24.47 | 0.030 |
| Q8ZQ40 | Flavoprotein wrbA                                                  | 20854 | 5.74  | 195.21 | 10 | 12 | 86.36 | 8.26  | 63  | 0 | 23.42 | 0.029 |
| Q7CR64 | UPF0325 protein yaeH                                               | 15084 | 7.17  | 186.69 | 10 | 11 | 57.03 | 10.97 | 51  | 0 | 22.44 | 0.029 |
| Q8ZK80 | 50S ribosomal protein L9                                           | 15774 | 7.73  | 496.78 | 10 | 14 | 68.46 | 9.21  | 82  | 1 | 18.58 | 0.026 |
| Q8ZP65 | Probable thiol peroxidase                                          | 18014 | 4.74  | 389.82 | 9  | 12 | 95.24 | 6.71  | 105 | 2 | 18.75 | 0.025 |
| Q8ZRN1 | D methionine binding lipoprotein metQ                              | 29417 | 5.23  | 321.13 | 9  | 30 | 43.17 | 8.56  | 59  | 2 | 19.75 | 0.030 |
| P0A2M5 | Uracil phosphoribosyltransferase                                   | 22518 | 5.17  | 276.03 | 9  | 16 | 73.56 | 8.98  | 56  | 1 | 19.50 | 0.030 |
| P14146 | Virulence transcriptional regulatory protein phoP                  | 25617 | 5.14  | 254.42 | 9  | 21 | 59.38 | 9.93  | 57  | 2 | 21.66 | 0.026 |
| Q9L4T0 | S ribosylhomocysteine lyase                                        | 19295 | 5.68  | 225.99 | 9  | 15 | 73.68 | 8.75  | 63  | 2 | 17.43 | 0.032 |
| P0A8B8 | UPF0133 protein ybaB                                               | 12006 | 4.82  | 219.69 | 9  | 11 | 87.16 | 6.32  | 45  | 1 | 20.78 | 0.031 |
| P69936 | NADP dependent L serine L allo threonine dehydrogenase ydfG        | 27025 | 5.78  | 204.50 | 9  | 19 | 72.98 | 10.41 | 56  | 4 | 18.93 | 0.030 |
| P66541 | 30S ribosomal protein S2                                           | 26741 | 6.73  | 194.06 | 9  | 23 | 67.63 | 6.48  | 52  | 2 | 20.63 | 0.034 |
| Q8ZRP4 | 2 3 4 5 tetrahydropyridine 2 6 dicarboxylate N succinyltransferase | 29833 | 5.39  | 415.82 | 9  | 25 | 37.96 | 8.59  | 54  | 0 | 19.28 | 0.027 |
| P0A283 | Glucose specific phosphotransferase enzyme IIA component           | 18235 | 4.54  | 510.63 | 8  | 12 | 72.78 | 9.39  | 93  | 1 | 18.61 | 0.023 |
| P67091 | Universal stress protein F                                         | 15704 | 5.92  | 475.42 | 8  | 11 | 65.97 | 7.60  | 85  | 1 | 16.25 | 0.026 |
| P14845 | Carbamoyl phosphate synthase small chain                           | 41625 | 6.00  | 423.62 | 8  | 27 | 47.91 | 9.00  | 61  | 3 | 20.35 | 0.032 |
| Q8ZKP7 | Triosephosphate isomerase                                          | 26899 | 5.61  | 280.36 | 8  | 22 | 52.94 | 8.30  | 90  | 1 | 18.75 | 0.028 |
| Q8ZQS2 | 2 3 bisphosphoglycerate dependent phosphoglycerate mutase          | 28475 | 5.71  | 251.30 | 8  | 19 | 41.60 | 7.56  | 48  | 0 | 20.60 | 0.027 |
| P67093 | Universal stress protein G                                         | 15891 | 6.20  | 238.81 | 8  | 9  | 78.87 | 12.29 | 71  | 1 | 19.72 | 0.028 |
| Q8ZK57 | Inositol 2 dehydrogenase                                           | 37243 | 4.92  | 238.49 | 8  | 25 | 47.62 | 13.21 | 57  | 3 | 26.60 | 0.033 |
| P0AA19 | Transcriptional regulatory protein ompR                            | 27336 | 5.99  | 217.82 | 8  | 23 | 46.44 | 10.33 | 51  | 3 | 23.34 | 0.031 |
| P0A2B3 | 30S ribosomal protein S7                                           | 17579 | 10.73 | 197.28 | 8  | 10 | 52.56 | 10.14 | 41  | 0 | 20.81 | 0.024 |
| P66738 | Ribosome recycling factor                                          | 20542 | 8.60  | 170.35 | 8  | 16 | 57.30 | 11.50 | 47  | 1 | 19.16 | 0.033 |
| P15888 | Oxygen insensitive NAD P H nitroreductase                          | 23940 | 5.27  | 165.92 | 8  | 18 | 47.47 | 7.53  | 45  | 0 | 19.82 | 0.033 |
| P66593 | 30S ribosomal protein S6                                           | 15163 | 5.08  | 535.20 | 8  | 9  | 58.78 | 10.64 | 109 | 0 | 16.42 | 0.022 |
| P66869 | Succinyl CoA ligase ADP forming subunit beta                       | 41454 | 5.12  | 325.60 | 7  | 39 | 37.11 | 7.65  | 37  | 0 | 21.23 | 0.026 |
| P66038 | 6 7 dimethyl 8 ribityllumazine synthase                            | 15998 | 4.91  | 296.94 | 7  | 8  | 56.41 | 9.26  | 56  | 0 | 17.07 | 0.023 |
| P0A2A3 | 50S ribosomal protein L1                                           | 24713 | 10.10 | 279.40 | 7  | 19 | 42.74 | 7.80  | 70  | 2 | 19.35 | 0.025 |
| P0A1S4 | DNA binding protein stpA                                           | 15477 | 9.24  | 176.69 | 7  | 12 | 53.38 | 8.81  | 45  | 1 | 21.48 | 0.033 |
| P65554 | RNA pyrophosphohydrolase                                           | 20792 | 10.35 | 133.75 | 7  | 16 | 46.02 | 6.92  | 32  | 1 | 25.45 | 0.030 |
| P66643 | 30S ribosomal protein S9                                           | 14817 | 11.34 | 113.25 | 7  | 14 | 47.69 | 7.89  | 34  | 0 | 22.02 | 0.034 |
| P0A1D5 | 10 kDa chaperonin                                                  | 10311 | 5.19  | 568.35 | 7  | 7  | 56.70 | 7.57  | 88  | 1 | 17.34 | 0.027 |
| P0A299 | 50S ribosomal protein L7 L12                                       | 12291 | 4.40  | 438.54 | 6  | 20 | 71.07 | 7.36  | 80  | 2 | 18.44 | 0.030 |
| P67904 | 30S ribosomal protein S10                                          | 11759 | 10.33 | 370.96 | 6  | 11 | 33.98 | 8.19  | 55  | 0 | 19.17 | 0.023 |
| P66692 | Ribose 5 phosphate isomerase A                                     | 22881 | 4.89  | 311.21 | 6  | 15 | 46.12 | 8.40  | 45  | 0 | 18.89 | 0.028 |
| P20753 | Peptidyl prolyl cis trans isomerase A                              | 20319 | 9.59  | 258.48 | 6  | 15 | 55.26 | 6.40  | 49  | 0 | 18.88 | 0.027 |
| Q8ZL48 | Phosphopantetheine adenyllyltransferase                            | 17944 | 8.05  | 196.29 | 6  | 14 | 61.64 | 10.09 | 40  | 1 | 20.60 | 0.031 |
| P66170 | 50S ribosomal protein L29                                          | 7255  | 10.52 | 182.03 | 6  | 4  | 58.73 | 7.08  | 43  | 1 | 17.07 | 0.029 |
| Q8ZLD7 | Universal stress protein A                                         | 16070 | 4.92  | 178.80 | 6  | 9  | 80.56 | 6.71  | 61  | 0 | 15.52 | 0.030 |
| P53636 | Superoxide dismutase Cu Zn 1                                       | 18358 | 6.55  | 150.70 | 6  | 10 | 43.50 | 10.68 | 57  | 0 | 19.47 | 0.028 |
| P0AA28 | Thioredoxin 1                                                      | 11799 | 4.47  | 443.28 | 6  | 8  | 55.96 | 9.21  | 70  | 0 | 17.27 | 0.023 |
| P0A1S0 | Integration host factor subunit alpha                              | 11360 | 9.88  | 222.00 | 5  | 13 | 37.37 | 9.98  | 36  | 0 | 21.42 | 0.031 |
| P0A7K0 | 50S ribosomal protein L11                                          | 14865 | 10.09 | 219.75 | 5  | 11 | 43.66 | 8.15  | 43  | 0 | 20.91 | 0.024 |
| Q7CPH8 | Protein export protein secB                                        | 17234 | 4.06  | 201.33 | 5  | 12 | 52.26 | 9.11  | 31  | 0 | 23.49 | 0.028 |
| P0A1R8 | DNA binding protein HU beta                                        | 9234  | 10.24 | 188.10 | 5  | 9  | 58.89 | 11.69 | 29  | 0 | 17.98 | 0.027 |
| P58663 | Capsular synthesis regulator component B                           | 23699 | 7.71  | 185.55 | 5  | 19 | 22.69 | 9.66  | 34  | 2 | 19.65 | 0.036 |
| P64267 | Protein gns                                                        | 6478  | 6.13  | 115.31 | 5  | 7  | 59.65 | 10.13 | 25  | 0 | 21.40 | 0.033 |
| Q56109 | Protein nrdI                                                       | 15314 | 9.68  | 102.65 | 5  | 13 | 57.35 | 7.05  | 25  | 0 | 23.92 | 0.028 |

|        |                                            |       |       |        |   |    |       |       |     |   |       |       |
|--------|--------------------------------------------|-------|-------|--------|---|----|-------|-------|-----|---|-------|-------|
| P0A2H9 | Thiol disulfide interchange protein dsbA   | 22896 | 5.55  | 640.54 | 5 | 14 | 39.61 | 7.47  | 106 | 3 | 17.43 | 0.028 |
| P0A7X0 | 30S ribosomal protein S8                   | 14117 | 9.85  | 276.48 | 4 | 12 | 27.69 | 10.21 | 34  | 0 | 21.43 | 0.019 |
| O54297 | 30S ribosomal protein S4                   | 23470 | 10.38 | 269.71 | 4 | 19 | 20.39 | 9.55  | 35  | 0 | 16.51 | 0.029 |
| P0AA07 | Phosphocarrier protein HPr                 | 9113  | 5.51  | 248.80 | 4 | 7  | 82.35 | 8.43  | 65  | 1 | 16.82 | 0.026 |
| P0AA02 | Transcription antitermination protein nusG | 20532 | 6.40  | 179.41 | 4 | 13 | 27.62 | 8.14  | 36  | 2 | 22.12 | 0.031 |
| P67617 | Probable Fe 2 trafficking protein          | 10892 | 5.87  | 158.44 | 4 | 15 | 40.66 | 8.75  | 28  | 1 | 22.65 | 0.032 |
| P0A1P8 | Glutaredoxin 1                             | 9917  | 5.54  | 109.03 | 4 | 10 | 45.98 | 7.85  | 24  | 0 | 17.25 | 0.035 |
| P0A1U6 | Uncharacterized protein yjgD               | 15687 | 3.44  | 107.46 | 4 | 8  | 34.78 | 6.86  | 28  | 0 | 18.84 | 0.027 |
| P67551 | UPF0253 protein yaeP                       | 7151  | 4.37  | 75.86  | 4 | 5  | 83.33 | 5.21  | 15  | 0 | 16.33 | 0.030 |
| P0A9Y9 | Cold shock like protein cspC               | 7397  | 7.70  | 379.11 | 4 | 5  | 47.83 | 6.51  | 47  | 0 | 14.91 | 0.023 |
| Q7CR46 | Anti adapter protein iraP                  | 9876  | 5.50  | 201.05 | 3 | 7  | 46.51 | 5.33  | 26  | 0 | 16.89 | 0.025 |
| Q7CPL6 | 50S ribosomal protein L18                  | 12761 | 10.88 | 141.78 | 3 | 9  | 35.04 | 10.83 | 20  | 0 | 19.34 | 0.031 |
| Q7CQN4 | Major outer membrane lipoprotein 1         | 8386  | 9.82  | 138.66 | 3 | 6  | 48.72 | 3.81  | 21  | 0 | 16.71 | 0.031 |
| P0A1R6 | DNA binding protein HU alpha               | 9515  | 10.12 | 638.82 | 3 | 7  | 46.67 | 2.51  | 78  | 0 | 14.67 | 0.016 |

| MA6926 + Zn(II) LC-MS run 2: 6926_Zn_220709_1a2_02 |                                                          |         |         |            |          |                      |              |                                |          |                   |                               |                             |
|----------------------------------------------------|----------------------------------------------------------|---------|---------|------------|----------|----------------------|--------------|--------------------------------|----------|-------------------|-------------------------------|-----------------------------|
| Accession                                          | Description                                              | mW (Da) | pI (pH) | PLGS Score | Peptides | Theoretical Peptides | Coverage (%) | Precursor RMS Mass Error (ppm) | Products | Modified Peptides | Products RMS Mass Error (ppm) | Products RMS RT Error (min) |
| P0A1D3                                             | 60 kDa chaperonin                                        | 57249   | 4.65    | 1348.42    | 34       | 44                   | 70.62        | 8.33                           | 295      | 2                 | 18.84                         | 0.031                       |
| P06202                                             | Periplasmic oligopeptide binding protein                 | 61254   | 6.03    | 1052.47    | 29       | 42                   | 64.27        | 7.14                           | 244      | 0                 | 18.80                         | 0.031                       |
| P0A1H3                                             | Elongation factor G                                      | 77550   | 5.00    | 562.20     | 28       | 47                   | 53.55        | 8.99                           | 163      | 2                 | 23.42                         | 0.034                       |
| P0A1H5                                             | Elongation factor Tu                                     | 43256   | 5.15    | 1535.21    | 27       | 30                   | 84.52        | 9.62                           | 303      | 3                 | 16.85                         | 0.032                       |
| P64076                                             | Enolase                                                  | 45570   | 5.08    | 961.52     | 25       | 34                   | 73.38        | 8.84                           | 244      | 1                 | 21.61                         | 0.031                       |
| P52616                                             | Phase 2 flagellin                                        | 52504   | 4.55    | 548.61     | 23       | 37                   | 70.75        | 7.54                           | 153      | 0                 | 21.59                         | 0.035                       |
| Q7CPK0                                             | sn glycerol 3 phosphate binding periplasmic protein ugpB | 48362   | 7.33    | 481.67     | 23       | 38                   | 65.07        | 9.71                           | 136      | 3                 | 23.07                         | 0.034                       |
| O86090                                             | Polyphosphate kinase                                     | 80406   | 8.89    | 470.88     | 23       | 67                   | 39.97        | 11.14                          | 125      | 2                 | 25.19                         | 0.037                       |
| Q7CPE2                                             | ATP synthase subunit beta                                | 50251   | 4.71    | 654.08     | 23       | 32                   | 71.09        | 8.52                           | 150      | 2                 | 21.58                         | 0.033                       |
| Q56073                                             | Chaperone protein dnaK                                   | 69215   | 4.64    | 458.62     | 22       | 59                   | 47.18        | 9.55                           | 122      | 2                 | 22.55                         | 0.034                       |
| P00924                                             | Enolase 1                                                | 46773   | 6.15    | 556.19     | 22       | 28                   | 57.21        | 9.88                           | 136      | 2                 | 21.70                         | 0.033                       |
| O33921                                             | Glucose 1 phosphatase                                    | 45530   | 6.64    | 766.46     | 21       | 25                   | 78.21        | 8.65                           | 203      | 1                 | 19.80                         | 0.032                       |
| P06179                                             | Flagellin                                                | 51581   | 4.60    | 618.47     | 20       | 36                   | 60.61        | 7.11                           | 167      | 4                 | 21.24                         | 0.031                       |
| P06196                                             | Silent protein ushA 0                                    | 60518   | 5.73    | 460.11     | 20       | 40                   | 65.27        | 9.55                           | 117      | 3                 | 21.49                         | 0.036                       |
| P0A1P0                                             | Glyceraldehyde 3 phosphate dehydrogenase                 | 35564   | 6.36    | 1188.38    | 20       | 29                   | 71.90        | 8.60                           | 267      | 1                 | 18.14                         | 0.026                       |
| P66932                                             | Trigger factor                                           | 48036   | 4.64    | 628.12     | 19       | 43                   | 50.46        | 9.34                           | 140      | 3                 | 20.42                         | 0.035                       |
| P0A1P6                                             | Glutamine synthetase                                     | 51752   | 5.25    | 434.06     | 19       | 33                   | 60.55        | 9.71                           | 107      | 3                 | 24.48                         | 0.035                       |
| P65702                                             | Phosphoglycerate kinase                                  | 41106   | 4.90    | 1108.06    | 19       | 30                   | 70.80        | 7.88                           | 185      | 0                 | 20.73                         | 0.031                       |
| Q8ZKQ1                                             | Autoinducer 2 binding protein lsrB                       | 36736   | 6.53    | 885.14     | 18       | 22                   | 71.18        | 7.56                           | 173      | 2                 | 18.69                         | 0.030                       |
| Q8ZP20                                             | Periplasmic trehalase                                    | 63469   | 5.15    | 487.39     | 18       | 44                   | 49.12        | 9.46                           | 141      | 3                 | 24.29                         | 0.034                       |
| P02906                                             | Sulfate binding protein                                  | 36517   | 7.72    | 486.98     | 18       | 28                   | 72.64        | 9.00                           | 117      | 0                 | 20.69                         | 0.036                       |
| P0A1E3                                             | Cysteine synthase A                                      | 34514   | 5.72    | 462.82     | 18       | 20                   | 75.85        | 8.57                           | 123      | 2                 | 22.27                         | 0.034                       |
| P64052                                             | Elongation factor Ts                                     | 30338   | 4.95    | 416.87     | 18       | 33                   | 63.60        | 10.55                          | 112      | 3                 | 20.81                         | 0.034                       |
| P55900                                             | Phosphoserine aminotransferase                           | 39806   | 5.17    | 393.63     | 18       | 28                   | 59.12        | 7.40                           | 107      | 3                 | 21.88                         | 0.036                       |
| P58661                                             | Aspartate aminotransferase                               | 43494   | 5.29    | 230.75     | 18       | 34                   | 55.30        | 8.25                           | 96       | 0                 | 22.33                         | 0.038                       |
| P41031                                             | Thiosulfate binding protein                              | 37559   | 9.19    | 1050.56    | 18       | 32                   | 61.24        | 7.32                           | 240      | 2                 | 17.76                         | 0.031                       |
| Q9ZF60                                             | Glutamate aspartate periplasmic binding protein          | 33381   | 9.16    | 650.56     | 17       | 21                   | 58.28        | 8.39                           | 143      | 1                 | 19.32                         | 0.035                       |
| Q8ZQT5                                             | Protein tolB                                             | 46120   | 8.73    | 546.50     | 17       | 21                   | 48.37        | 8.33                           | 119      | 0                 | 16.81                         | 0.034                       |

|        |                                                                    |       |       |        |    |    |       |       |     |   |       |       |
|--------|--------------------------------------------------------------------|-------|-------|--------|----|----|-------|-------|-----|---|-------|-------|
| P0A1W6 | Leucine specific binding protein                                   | 39375 | 5.84  | 359.60 | 17 | 27 | 63.69 | 10.64 | 111 | 2 | 20.97 | 0.035 |
| Q7CR87 | Chaperone surA                                                     | 47221 | 6.88  | 339.25 | 17 | 31 | 65.19 | 7.67  | 102 | 1 | 20.88 | 0.032 |
| P66764 | S adenosylmethionine synthetase                                    | 41926 | 4.91  | 283.30 | 17 | 32 | 69.01 | 7.21  | 94  | 3 | 24.37 | 0.036 |
| P26982 | Protease do                                                        | 49284 | 9.19  | 662.14 | 17 | 29 | 45.05 | 7.86  | 162 | 2 | 20.31 | 0.031 |
| Q7CPE1 | ATP synthase subunit alpha                                         | 55078 | 5.61  | 519.36 | 16 | 40 | 43.08 | 8.34  | 103 | 1 | 20.02 | 0.033 |
| P0A2C5 | D ribose binding periplasmic protein                               | 30943 | 9.20  | 475.62 | 16 | 25 | 67.23 | 9.61  | 122 | 1 | 21.71 | 0.032 |
| P65882 | Adenylosuccinate synthetase                                        | 47347 | 5.15  | 466.09 | 16 | 42 | 49.07 | 9.27  | 93  | 2 | 22.28 | 0.034 |
| P25077 | Malate dehydrogenase                                               | 32455 | 5.97  | 964.64 | 16 | 22 | 74.68 | 8.24  | 176 | 0 | 18.53 | 0.027 |
| P23905 | D galactose binding periplasmic protein                            | 35791 | 5.75  | 487.97 | 15 | 30 | 66.87 | 9.12  | 112 | 3 | 21.50 | 0.033 |
| P0A297 | 50S ribosomal protein L10                                          | 17789 | 9.46  | 444.39 | 15 | 15 | 73.33 | 7.14  | 107 | 4 | 19.66 | 0.036 |
| P02910 | Histidine binding periplasmic protein                              | 28361 | 5.95  | 688.45 | 15 | 23 | 65.00 | 9.94  | 123 | 0 | 20.18 | 0.034 |
| P0A2E1 | Serine hydroxymethyltransferase                                    | 45426 | 6.02  | 393.60 | 14 | 36 | 48.20 | 9.58  | 89  | 3 | 21.16 | 0.036 |
| Q7CQ05 | Autonomous glycyl radical cofactor                                 | 14335 | 4.92  | 445.87 | 13 | 15 | 88.19 | 8.20  | 125 | 1 | 17.05 | 0.029 |
| Q8ZPD6 | Uncharacterized protein yncE                                       | 38480 | 9.55  | 310.80 | 13 | 27 | 49.29 | 9.58  | 89  | 2 | 22.40 | 0.038 |
| P0A1V4 | Adenylate kinase                                                   | 23473 | 5.39  | 299.84 | 13 | 24 | 64.49 | 7.04  | 96  | 2 | 19.49 | 0.037 |
| Q8ZRC9 | UPF0234 protein yajQ                                               | 18307 | 5.42  | 285.13 | 13 | 14 | 70.55 | 7.12  | 83  | 1 | 22.06 | 0.035 |
| P26976 | Non specific acid phosphatase                                      | 28364 | 9.22  | 250.71 | 13 | 19 | 61.20 | 9.50  | 69  | 2 | 20.77 | 0.035 |
| P37412 | 3 isopropylmalate dehydrogenase                                    | 39488 | 5.14  | 232.37 | 13 | 25 | 52.89 | 11.46 | 61  | 0 | 27.50 | 0.034 |
| P0A7W4 | 30S ribosomal protein S5                                           | 17592 | 10.56 | 657.27 | 13 | 13 | 75.45 | 11.84 | 138 | 0 | 22.93 | 0.033 |
| P14845 | Carbamoyl phosphate synthase small chain                           | 41625 | 6.00  | 420.91 | 12 | 27 | 57.59 | 9.63  | 81  | 3 | 22.51 | 0.035 |
| P11003 | 5 10 methylenetetrahydrofolate reductase                           | 33151 | 6.44  | 386.25 | 12 | 30 | 55.07 | 10.89 | 70  | 0 | 20.07 | 0.033 |
| P0A7Z7 | DNA directed RNA polymerase subunit alpha                          | 36489 | 4.78  | 359.06 | 12 | 28 | 51.06 | 9.42  | 73  | 3 | 21.07 | 0.038 |
| P0A2A3 | 50S ribosomal protein L1                                           | 24713 | 10.10 | 339.98 | 12 | 19 | 61.11 | 6.68  | 88  | 2 | 18.70 | 0.031 |
| P67912 | ADP L glycerol D mannose 6 epimerase                               | 34827 | 4.72  | 303.12 | 12 | 33 | 44.52 | 8.95  | 59  | 1 | 24.79 | 0.037 |
| Q8ZQD4 | Outer membrane lipoprotein carrier protein                         | 22467 | 7.39  | 290.09 | 12 | 17 | 79.31 | 11.02 | 68  | 0 | 19.09 | 0.037 |
| Q8ZQR4 | 6-phosphogluconolactonase                                          | 36314 | 5.07  | 197.68 | 12 | 18 | 71.90 | 12.13 | 57  | 0 | 25.69 | 0.039 |
| P17215 | Leu Ile Val Thr binding protein                                    | 38762 | 5.69  | 815.92 | 12 | 21 | 69.86 | 7.62  | 179 | 1 | 18.81 | 0.028 |
| Q8ZRP4 | 2,3,4,5-tetrahydropyridine 2,6-dicarboxylate N-succinyltransferase | 29833 | 5.39  | 327.88 | 11 | 25 | 58.03 | 10.64 | 56  | 0 | 25.23 | 0.034 |
| P02936 | Outer membrane protein A                                           | 37491 | 5.50  | 277.50 | 11 | 25 | 46.57 | 9.08  | 61  | 1 | 19.38 | 0.038 |
| P65692 | 6-phosphofructokinase                                              | 34892 | 5.47  | 271.71 | 11 | 28 | 48.13 | 8.52  | 62  | 2 | 24.71 | 0.035 |
| P0AA02 | Transcription antitermination protein nusG                         | 20532 | 6.40  | 134.93 | 11 | 13 | 61.88 | 10.34 | 61  | 1 | 22.74 | 0.039 |
| P66955 | Transaldolase B                                                    | 35149 | 4.91  | 399.34 | 11 | 26 | 49.84 | 8.45  | 58  | 1 | 19.89 | 0.038 |
| P63411 | Acetate kinase                                                     | 43230 | 5.91  | 328.83 | 10 | 25 | 61.75 | 10.86 | 75  | 2 | 24.60 | 0.036 |
| P66313 | 50S ribosomal protein L6                                           | 18848 | 10.09 | 322.02 | 10 | 13 | 51.98 | 8.57  | 63  | 1 | 19.97 | 0.035 |
| Q8ZKP7 | Triosephosphate isomerase                                          | 26899 | 5.61  | 287.49 | 10 | 22 | 55.29 | 11.03 | 107 | 1 | 21.16 | 0.030 |
| P22107 | TraT complement resistance protein                                 | 26261 | 9.35  | 271.35 | 10 | 18 | 44.86 | 12.00 | 57  | 0 | 21.39 | 0.035 |
| P60446 | 50S ribosomal protein L3                                           | 22233 | 10.25 | 211.23 | 10 | 20 | 61.72 | 10.80 | 57  | 2 | 22.50 | 0.034 |
| P0A299 | 50S ribosomal protein L7 L12                                       | 12291 | 4.40  | 429.26 | 10 | 20 | 90.08 | 7.91  | 95  | 1 | 16.39 | 0.036 |
| P0A283 | Glucose specific phosphotransferase enzyme IIA component           | 18235 | 4.54  | 364.37 | 9  | 12 | 56.21 | 7.82  | 81  | 1 | 21.47 | 0.031 |
| Q8ZP65 | Probable thiol peroxidase                                          | 18014 | 4.74  | 308.00 | 9  | 12 | 84.52 | 7.77  | 92  | 0 | 18.87 | 0.031 |
| P66593 | 30S ribosomal protein S6                                           | 15163 | 5.08  | 274.19 | 9  | 9  | 64.12 | 7.68  | 66  | 1 | 16.26 | 0.033 |
| P20753 | Peptidyl prolyl cis-trans isomerase A                              | 20319 | 9.59  | 182.00 | 9  | 15 | 70.00 | 7.52  | 55  | 0 | 21.83 | 0.035 |
| P0A1D5 | 10 kDa chaperonin                                                  | 10311 | 5.19  | 484.98 | 9  | 7  | 82.47 | 7.80  | 90  | 0 | 17.91 | 0.027 |
| P0A1Z2 | Chaperone protein skp                                              | 17894 | 10.25 | 371.66 | 8  | 10 | 56.52 | 5.75  | 78  | 0 | 18.99 | 0.032 |
| P66692 | Ribose 5-phosphate isomerase A                                     | 22881 | 4.89  | 290.62 | 8  | 15 | 47.03 | 10.34 | 53  | 0 | 22.15 | 0.030 |
| Q7CQV9 | DNA protection during starvation protein                           | 18705 | 5.66  | 249.51 | 8  | 18 | 59.88 | 10.09 | 41  | 0 | 21.49 | 0.034 |
| P67093 | Universal stress protein G                                         | 15891 | 6.20  | 244.55 | 8  | 9  | 77.46 | 10.34 | 58  | 3 | 21.26 | 0.031 |
| P0A1V6 | Ribose phosphate pyrophosphokinase                                 | 34194 | 5.06  | 239.77 | 8  | 19 | 46.98 | 9.76  | 53  | 1 | 23.31 | 0.039 |

|        |                                                             |       |       |        |   |    |       |       |     |   |       |       |
|--------|-------------------------------------------------------------|-------|-------|--------|---|----|-------|-------|-----|---|-------|-------|
| P55890 | Thiol disulfide interchange protein dsbC                    | 25819 | 7.34  | 228.89 | 8 | 15 | 42.19 | 13.24 | 51  | 1 | 24.49 | 0.037 |
| P0A251 | Alkyl hydroperoxide reductase subunit C                     | 20734 | 4.85  | 227.01 | 8 | 16 | 64.71 | 9.11  | 57  | 0 | 20.89 | 0.036 |
| O54297 | 30S ribosomal protein S4                                    | 23470 | 10.38 | 224.50 | 8 | 19 | 48.54 | 7.29  | 43  | 0 | 24.78 | 0.040 |
| P66541 | 30S ribosomal protein S2                                    | 26741 | 6.73  | 182.94 | 8 | 23 | 39.83 | 8.11  | 34  | 0 | 25.07 | 0.037 |
| P0A1S2 | DNA binding protein H NS                                    | 15532 | 5.09  | 488.72 | 8 | 14 | 51.82 | 8.55  | 127 | 2 | 16.92 | 0.031 |
| Q8ZK80 | 50S ribosomal protein L9                                    | 15774 | 7.73  | 250.86 | 7 | 14 | 57.72 | 8.05  | 46  | 0 | 23.90 | 0.031 |
| P0A2M5 | Uracil phosphoribosyltransferase                            | 22518 | 5.17  | 237.86 | 7 | 16 | 58.17 | 11.13 | 35  | 0 | 19.45 | 0.026 |
| Q9L4T0 | S ribosylhomocysteine lyase                                 | 19295 | 5.68  | 186.67 | 7 | 15 | 69.59 | 8.37  | 52  | 3 | 19.98 | 0.038 |
| P0A1A5 | Branched chain amino acid aminotransferase                  | 34031 | 5.47  | 259.33 | 7 | 26 | 33.66 | 10.91 | 50  | 2 | 22.24 | 0.032 |
| P0A7K0 | 50S ribosomal protein L11                                   | 14865 | 10.09 | 216.47 | 6 | 11 | 40.14 | 8.94  | 41  | 0 | 17.99 | 0.026 |
| P0A2F4 | Superoxide dismutase Fe                                     | 21294 | 5.52  | 198.43 | 6 | 14 | 54.40 | 9.92  | 42  | 0 | 18.26 | 0.033 |
| P67904 | 30S ribosomal protein S10                                   | 11759 | 10.33 | 179.72 | 6 | 11 | 43.69 | 7.89  | 38  | 0 | 18.61 | 0.032 |
| P67617 | Probable Fe 2 trafficking protein                           | 10892 | 5.87  | 131.38 | 6 | 15 | 73.63 | 10.06 | 30  | 1 | 26.56 | 0.034 |
| P66038 | 6 7 dimethyl 8 ribityllumazine synthase                     | 15998 | 4.91  | 441.05 | 6 | 8  | 53.85 | 9.15  | 62  | 0 | 19.03 | 0.027 |
| P0AA28 | Thioredoxin 1                                               | 11799 | 4.47  | 325.79 | 5 | 8  | 55.96 | 7.54  | 60  | 0 | 17.04 | 0.029 |
| P0A9Y9 | Cold shock like protein cspC                                | 7397  | 7.70  | 265.42 | 5 | 5  | 72.46 | 7.14  | 41  | 0 | 19.02 | 0.034 |
| P69936 | NADP dependent L serine L allo threonine dehydrogenase ydfG | 27025 | 5.78  | 237.15 | 5 | 19 | 64.11 | 9.16  | 46  | 4 | 20.15 | 0.035 |
| O54296 | 30S ribosomal protein S11                                   | 13822 | 11.74 | 142.30 | 5 | 9  | 48.84 | 6.48  | 26  | 0 | 24.66 | 0.038 |
| P0A2H9 | Thiol disulfide interchange protein dsbA                    | 22896 | 5.55  | 409.11 | 5 | 14 | 50.72 | 8.05  | 68  | 1 | 20.51 | 0.032 |
| P0AA07 | Phosphocarrier protein HPr                                  | 9113  | 5.51  | 184.59 | 4 | 7  | 85.88 | 10.20 | 57  | 0 | 18.15 | 0.030 |
| Q8ZM79 | UPF0267 protein yqfB                                        | 11891 | 4.68  | 171.33 | 4 | 10 | 41.75 | 6.23  | 32  | 0 | 20.86 | 0.034 |
| P0A1B7 | ATP synthase epsilon chain                                  | 15054 | 5.82  | 162.85 | 4 | 7  | 49.64 | 8.58  | 37  | 1 | 22.89 | 0.034 |
| P0A1G5 | DnaK suppressor protein                                     | 17504 | 4.87  | 121.09 | 4 | 12 | 56.29 | 9.09  | 23  | 1 | 16.59 | 0.035 |
| P67091 | Universal stress protein F                                  | 15704 | 5.92  | 219.98 | 4 | 11 | 45.14 | 6.87  | 40  | 0 | 15.81 | 0.026 |
| P0A7X0 | 30S ribosomal protein S8                                    | 14117 | 9.85  | 167.74 | 3 | 12 | 32.31 | 7.18  | 30  | 1 | 16.73 | 0.031 |
| P0A6B1 | Acyl carrier protein                                        | 8634  | 3.75  | 129.02 | 2 | 4  | 32.05 | 7.43  | 18  | 0 | 18.27 | 0.030 |
| P0A1R6 | DNA binding protein HU alpha                                | 9515  | 10.12 | 571.56 | 2 | 7  | 46.67 | 4.92  | 66  | 0 | 15.57 | 0.023 |

| MA6926 + Zn(II) LC-MS run 3: 6926_Zn_220709_1a2_03 |                                                                      |         |         |            |          |                      |              |                                |          |                   |                               |                             |
|----------------------------------------------------|----------------------------------------------------------------------|---------|---------|------------|----------|----------------------|--------------|--------------------------------|----------|-------------------|-------------------------------|-----------------------------|
| Accession                                          | Description                                                          | mW (Da) | pI (pH) | PLGS Score | Peptides | Theoretical Peptides | Coverage (%) | Precursor RMS Mass Error (ppm) | Products | Modified Peptides | Products RMS Mass Error (ppm) | Products RMS RT Error (min) |
| P0A1D3                                             | 60 kDa chaperonin                                                    | 57249   | 4.65    | 1151.54    | 41       | 44                   | 79.01        | 9.25                           | 327      | 4                 | 18.21                         | 0.041                       |
| P06202                                             | Periplasmic oligopeptide binding protein                             | 61254   | 6.03    | 1333.73    | 29       | 42                   | 65.56        | 8.43                           | 274      | 0                 | 19.05                         | 0.039                       |
| P41031                                             | Thiosulfate binding protein                                          | 37559   | 9.19    | 877.02     | 28       | 32                   | 85.80        | 7.91                           | 247      | 1                 | 20.36                         | 0.039                       |
| P52616                                             | Phase 2 flagellin                                                    | 52504   | 4.55    | 460.50     | 26       | 37                   | 61.46        | 9.76                           | 154      | 0                 | 22.80                         | 0.041                       |
| P0A1H5                                             | Elongation factor Tu                                                 | 43256   | 5.15    | 1457.46    | 25       | 30                   | 79.95        | 10.59                          | 282      | 3                 | 17.17                         | 0.035                       |
| Q56073                                             | Chaperone protein dnaK                                               | 69215   | 4.64    | 536.76     | 24       | 59                   | 50.31        | 8.33                           | 153      | 3                 | 21.64                         | 0.042                       |
| P0A1H3                                             | Elongation factor G                                                  | 77550   | 5.00    | 642.07     | 24       | 47                   | 64.35        | 8.04                           | 162      | 4                 | 20.68                         | 0.038                       |
| Q9L6N1                                             | 5 methyltetrahydropteroyltriglutamate homocysteine methyltransferase | 84615   | 5.67    | 527.47     | 23       | 60                   | 35.81        | 9.58                           | 121      | 2                 | 22.70                         | 0.044                       |
| P65702                                             | Phosphoglycerate kinase                                              | 41106   | 4.90    | 1136.97    | 23       | 30                   | 71.58        | 7.47                           | 209      | 1                 | 18.84                         | 0.035                       |
| P64076                                             | Enolase                                                              | 45570   | 5.08    | 984.60     | 22       | 34                   | 75.46        | 7.19                           | 201      | 1                 | 20.07                         | 0.040                       |
| Q7CPE1                                             | ATP synthase subunit alpha                                           | 55078   | 5.61    | 626.79     | 22       | 40                   | 52.63        | 9.08                           | 137      | 1                 | 22.52                         | 0.041                       |
| P23905                                             | D galactose binding periplasmic protein                              | 35791   | 5.75    | 615.03     | 22       | 30                   | 75.00        | 8.99                           | 146      | 2                 | 21.47                         | 0.040                       |
| P0A1P0                                             | Glyceraldehyde 3 phosphate dehydrogenase                             | 35564   | 6.36    | 1138.79    | 22       | 29                   | 69.79        | 7.44                           | 230      | 1                 | 18.25                         | 0.035                       |
| P64052                                             | Elongation factor Ts                                                 | 30338   | 4.95    | 536.81     | 21       | 33                   | 82.33        | 11.15                          | 134      | 3                 | 21.02                         | 0.041                       |
| P26982                                             | Protease do                                                          | 49284   | 9.19    | 601.90     | 20       | 29                   | 60.63        | 7.44                           | 154      | 3                 | 19.64                         | 0.040                       |

|        |                                                          |       |       |         |    |    |       |       |     |   |       |       |
|--------|----------------------------------------------------------|-------|-------|---------|----|----|-------|-------|-----|---|-------|-------|
| Q8ZQT5 | Protein tolB                                             | 46120 | 8.73  | 633.12  | 20 | 21 | 56.28 | 9.56  | 137 | 0 | 20.97 | 0.040 |
| Q8ZP20 | Periplasmic trehalase                                    | 63469 | 5.15  | 557.23  | 19 | 44 | 45.79 | 6.76  | 147 | 2 | 22.20 | 0.038 |
| P41033 | Phosphoenolpyruvate carboxykinase ATP                    | 59539 | 5.58  | 447.04  | 19 | 45 | 52.42 | 9.64  | 101 | 1 | 22.47 | 0.045 |
| Q7CPK0 | sn glycerol 3 phosphate binding periplasmic protein ugpB | 48362 | 7.33  | 444.11  | 19 | 38 | 60.73 | 8.82  | 116 | 4 | 24.12 | 0.042 |
| P65882 | Adenylosuccinate synthetase                              | 47347 | 5.15  | 349.96  | 19 | 42 | 52.55 | 9.17  | 94  | 2 | 24.13 | 0.040 |
| Q8ZKQ1 | Autoinducer 2 binding protein lsrB                       | 36736 | 6.53  | 1025.31 | 19 | 22 | 74.71 | 7.04  | 201 | 2 | 20.35 | 0.041 |
| O33921 | Glucose 1 phosphatase                                    | 45530 | 6.64  | 730.05  | 18 | 25 | 66.34 | 8.44  | 168 | 1 | 19.70 | 0.035 |
| Q7CPE2 | ATP synthase subunit beta                                | 50251 | 4.71  | 522.53  | 18 | 32 | 52.17 | 9.05  | 116 | 1 | 18.66 | 0.042 |
| P0A1E3 | Cysteine synthase A                                      | 34514 | 5.72  | 493.32  | 18 | 20 | 76.16 | 6.32  | 120 | 2 | 19.01 | 0.040 |
| P0A1P6 | Glutamine synthetase                                     | 51752 | 5.25  | 382.94  | 18 | 33 | 61.83 | 7.06  | 108 | 1 | 21.93 | 0.043 |
| Q7CR87 | Chaperone surA                                           | 47221 | 6.88  | 378.17  | 18 | 31 | 66.36 | 9.71  | 134 | 1 | 21.89 | 0.040 |
| P25077 | Malate dehydrogenase                                     | 32455 | 5.97  | 819.07  | 18 | 22 | 84.94 | 7.34  | 172 | 0 | 17.02 | 0.034 |
| P0A1W6 | Leucine specific binding protein                         | 39375 | 5.84  | 319.74  | 17 | 27 | 53.93 | 9.45  | 97  | 0 | 19.92 | 0.043 |
| P06179 | Flagellin                                                | 51581 | 4.60  | 472.50  | 17 | 36 | 53.54 | 7.73  | 126 | 1 | 21.34 | 0.042 |
| P66932 | Trigger factor                                           | 48036 | 4.64  | 439.25  | 16 | 43 | 41.20 | 9.46  | 85  | 1 | 23.39 | 0.043 |
| P00924 | Enolase I                                                | 46773 | 6.15  | 677.76  | 16 | 28 | 55.38 | 10.14 | 133 | 4 | 20.08 | 0.036 |
| Q7CQ05 | Autonomous glycyl radical cofactor                       | 14335 | 4.92  | 441.79  | 15 | 15 | 88.98 | 7.81  | 118 | 0 | 16.42 | 0.040 |
| P02906 | Sulfate binding protein                                  | 36517 | 7.72  | 416.38  | 15 | 28 | 56.54 | 10.06 | 103 | 0 | 20.61 | 0.045 |
| P58661 | Aspartate aminotransferase                               | 43494 | 5.29  | 249.75  | 15 | 34 | 38.13 | 10.89 | 76  | 0 | 23.23 | 0.040 |
| P60446 | 50S ribosomal protein L3                                 | 22233 | 10.25 | 246.02  | 15 | 20 | 69.38 | 10.10 | 67  | 0 | 21.56 | 0.038 |
| Q9Zf60 | Glutamate aspartate periplasmic binding protein          | 33381 | 9.16  | 743.43  | 15 | 21 | 69.87 | 8.83  | 143 | 1 | 18.77 | 0.039 |
| P67557 | Glucans biosynthesis protein G                           | 57808 | 8.77  | 384.53  | 14 | 40 | 53.62 | 9.25  | 84  | 3 | 21.42 | 0.043 |
| P02936 | Outer membrane protein A                                 | 37491 | 5.50  | 375.58  | 14 | 25 | 44.29 | 11.68 | 74  | 0 | 21.28 | 0.038 |
| P17215 | Leu Ile Val Thr binding protein                          | 38762 | 5.69  | 732.55  | 14 | 21 | 79.73 | 8.70  | 183 | 2 | 16.64 | 0.034 |
| P02911 | Lysine arginine ornithine binding periplasmic protein    | 28182 | 5.90  | 197.56  | 13 | 23 | 57.31 | 7.33  | 52  | 1 | 23.80 | 0.045 |
| Q8ZPD6 | Uncharacterized protein yncE                             | 38480 | 9.55  | 288.71  | 13 | 27 | 45.33 | 9.68  | 67  | 0 | 21.16 | 0.044 |
| P0A2C5 | D ribose binding periplasmic protein                     | 30943 | 9.20  | 543.42  | 12 | 25 | 69.93 | 8.76  | 120 | 3 | 18.28 | 0.037 |
| Q8ZKP7 | Triosephosphate isomerase                                | 26899 | 5.61  | 370.65  | 12 | 22 | 50.98 | 10.17 | 127 | 0 | 20.64 | 0.038 |
| P14845 | Carbamoyl phosphate synthase small chain                 | 41625 | 6.00  | 368.64  | 12 | 27 | 55.50 | 9.73  | 61  | 1 | 23.13 | 0.047 |
| P26976 | Non specific acid phosphatase                            | 28364 | 9.22  | 339.07  | 12 | 19 | 62.80 | 10.53 | 75  | 2 | 19.41 | 0.042 |
| Q8ZRN1 | D methionine binding lipoprotein metQ                    | 29417 | 5.23  | 330.03  | 12 | 30 | 72.32 | 9.01  | 70  | 1 | 23.88 | 0.043 |
| P02910 | Histidine binding periplasmic protein                    | 28361 | 5.95  | 653.63  | 12 | 23 | 50.38 | 6.38  | 110 | 0 | 16.07 | 0.036 |
| P0A297 | 50S ribosomal protein L10                                | 17789 | 9.46  | 419.68  | 11 | 15 | 56.97 | 9.45  | 74  | 2 | 20.66 | 0.039 |
| P55900 | Phosphoserine aminotransferase                           | 39806 | 5.17  | 293.48  | 11 | 28 | 38.12 | 8.91  | 63  | 3 | 25.03 | 0.039 |
| Q8ZK80 | 50S ribosomal protein L9                                 | 15774 | 7.73  | 289.50  | 11 | 14 | 69.13 | 7.19  | 85  | 1 | 21.76 | 0.039 |
| P63411 | Acetate kinase                                           | 43230 | 5.91  | 267.22  | 11 | 25 | 62.25 | 8.82  | 87  | 3 | 21.00 | 0.044 |
| P0A7W4 | 30S ribosomal protein S5                                 | 17592 | 10.56 | 647.98  | 11 | 13 | 70.66 | 7.12  | 102 | 2 | 17.84 | 0.034 |
| P0A2A3 | 50S ribosomal protein L1                                 | 24713 | 10.10 | 461.63  | 10 | 19 | 44.02 | 9.67  | 76  | 1 | 20.86 | 0.040 |
| Q8ZP65 | Probable thiol peroxidase                                | 18014 | 4.74  | 273.04  | 10 | 12 | 80.36 | 9.99  | 85  | 1 | 19.16 | 0.032 |
| P0A1V4 | Adenylate kinase                                         | 23473 | 5.39  | 272.88  | 10 | 24 | 44.39 | 9.09  | 70  | 2 | 15.53 | 0.041 |
| P0A1A5 | Branched chain amino acid aminotransferase               | 34031 | 5.47  | 258.18  | 10 | 26 | 38.51 | 10.40 | 51  | 0 | 19.66 | 0.042 |
| P05989 | Ketol acid reductoisomerase                              | 53907 | 4.96  | 255.31  | 10 | 47 | 36.25 | 8.63  | 53  | 2 | 22.97 | 0.046 |
| Q8ZQ40 | Flavoprotein wrbA                                        | 20854 | 5.74  | 233.24  | 10 | 12 | 84.85 | 11.85 | 71  | 0 | 23.70 | 0.044 |
| P0A1V6 | Ribose phosphate pyrophosphokinase                       | 34194 | 5.06  | 195.27  | 10 | 19 | 53.02 | 8.81  | 43  | 0 | 24.26 | 0.039 |
| O54297 | 30S ribosomal protein S4                                 | 23470 | 10.38 | 189.20  | 10 | 19 | 43.69 | 9.31  | 56  | 0 | 23.62 | 0.043 |
| Q7CR64 | UPF0325 protein yaeH                                     | 15084 | 7.17  | 156.57  | 10 | 11 | 56.25 | 10.58 | 39  | 0 | 21.04 | 0.049 |
| P0A1S2 | DNA binding protein H NS                                 | 15532 | 5.09  | 547.94  | 10 | 14 | 64.96 | 10.04 | 120 | 1 | 16.83 | 0.035 |
| Q9L4T0 | S ribosylhomocysteine lyase                              | 19295 | 5.68  | 129.77  | 9  | 15 | 70.18 | 10.86 | 47  | 2 | 21.97 | 0.043 |



|        |                                                                    |       |       |        |   |    |       |       |    |   |       |       |
|--------|--------------------------------------------------------------------|-------|-------|--------|---|----|-------|-------|----|---|-------|-------|
| P0A299 | 50S ribosomal protein L7 L12                                       | 12291 | 4.40  | 341.20 | 9 | 20 | 84.30 | 9.97  | 60 | 1 | 21.06 | 0.041 |
| Q8ZRP4 | 2 3 4 5 tetrahydropyridine 2 6 dicarboxylate N succinyltransferase | 29833 | 5.39  | 302.61 | 8 | 25 | 37.96 | 6.70  | 48 | 0 | 20.64 | 0.040 |
| P0A1Z2 | Chaperone protein skp                                              | 17894 | 10.25 | 263.15 | 8 | 10 | 57.76 | 5.14  | 57 | 0 | 19.32 | 0.040 |
| P69936 | NADP dependent L serine L allo threonine dehydrogenase ydfG        | 27025 | 5.78  | 237.37 | 8 | 19 | 53.23 | 11.34 | 73 | 4 | 23.78 | 0.044 |
| P22107 | TraT complement resistance protein                                 | 26261 | 9.35  | 234.29 | 8 | 18 | 41.56 | 11.60 | 54 | 3 | 17.88 | 0.042 |
| P0A2M5 | Uracil phosphoribosyltransferase                                   | 22518 | 5.17  | 221.04 | 8 | 16 | 48.08 | 7.61  | 50 | 1 | 17.76 | 0.039 |
| P66541 | 30S ribosomal protein S2                                           | 26741 | 6.73  | 159.83 | 8 | 23 | 51.45 | 9.43  | 54 | 2 | 22.24 | 0.048 |
| P60726 | 50S ribosomal protein L4                                           | 22072 | 10.19 | 139.12 | 8 | 18 | 52.24 | 6.49  | 47 | 2 | 22.81 | 0.045 |
| P0A283 | Glucose specific phosphotransferase enzyme IIA component           | 18235 | 4.54  | 407.86 | 8 | 12 | 50.30 | 8.50  | 83 | 0 | 16.62 | 0.034 |
| P0A2H9 | Thiol disulfide interchange protein dsbA                           | 22896 | 5.55  | 498.52 | 7 | 14 | 54.11 | 8.64  | 98 | 2 | 18.32 | 0.036 |
| P0A251 | Alkyl hydroperoxide reductase subunit C                            | 20734 | 4.85  | 323.21 | 7 | 16 | 51.34 | 7.21  | 45 | 0 | 19.35 | 0.040 |
| P67093 | Universal stress protein G                                         | 15891 | 6.20  | 261.82 | 7 | 9  | 71.83 | 11.09 | 54 | 1 | 22.80 | 0.044 |
| P66593 | 30S ribosomal protein S6                                           | 15163 | 5.08  | 193.07 | 7 | 9  | 51.15 | 10.27 | 35 | 0 | 18.81 | 0.043 |
| P65889 | Phosphoribosylaminoimidazole succinocarboxamide synthase           | 26890 | 5.02  | 163.30 | 7 | 19 | 35.87 | 7.34  | 39 | 0 | 19.37 | 0.042 |
| P0A8B8 | UPF0133 protein ybaB                                               | 12006 | 4.82  | 129.39 | 7 | 11 | 71.56 | 8.01  | 40 | 0 | 23.21 | 0.052 |
| P0A1D5 | 10 kDa chaperonin                                                  | 10311 | 5.19  | 600.77 | 7 | 7  | 85.57 | 6.74  | 90 | 1 | 17.27 | 0.036 |
| P0A9Y9 | Cold shock like protein cspC                                       | 7397  | 7.70  | 227.92 | 6 | 5  | 86.96 | 7.42  | 46 | 0 | 20.07 | 0.041 |
| P67091 | Universal stress protein F                                         | 15704 | 5.92  | 215.59 | 6 | 11 | 53.47 | 4.77  | 37 | 0 | 21.90 | 0.042 |
| P66692 | Ribose 5 phosphate isomerase A                                     | 22881 | 4.89  | 199.88 | 6 | 15 | 53.88 | 6.21  | 40 | 0 | 18.42 | 0.040 |
| P53636 | Superoxide dismutase Cu Zn 1                                       | 18358 | 6.55  | 198.50 | 6 | 10 | 48.02 | 7.92  | 37 | 0 | 18.23 | 0.033 |
| Q8ZR01 | Rare lipoprotein A                                                 | 39083 | 7.82  | 187.04 | 6 | 17 | 32.81 | 10.53 | 33 | 0 | 22.03 | 0.049 |
| Q7CQV9 | DNA protection during starvation protein                           | 18705 | 5.66  | 120.75 | 6 | 18 | 42.52 | 12.19 | 30 | 0 | 21.66 | 0.043 |
| P66313 | 50S ribosomal protein L6                                           | 18848 | 10.09 | 271.55 | 6 | 13 | 35.59 | 7.86  | 42 | 0 | 19.66 | 0.033 |
| P66038 | 6 7 dimethyl 8 ribityllumazine synthase                            | 15998 | 4.91  | 249.93 | 5 | 8  | 51.28 | 10.15 | 40 | 0 | 19.09 | 0.035 |
| Q7CPH8 | Protein export protein secB                                        | 17234 | 4.06  | 214.59 | 5 | 12 | 56.77 | 11.91 | 36 | 0 | 22.15 | 0.044 |
| P67904 | 30S ribosomal protein S10                                          | 11759 | 10.33 | 183.60 | 5 | 11 | 47.57 | 7.34  | 29 | 0 | 20.04 | 0.038 |
| Q8ZLD7 | Universal stress protein A                                         | 16070 | 4.92  | 169.69 | 5 | 9  | 63.19 | 7.53  | 29 | 0 | 20.29 | 0.047 |
| P0AA28 | Thioredoxin 1                                                      | 11799 | 4.47  | 344.55 | 5 | 8  | 44.04 | 8.85  | 64 | 1 | 16.49 | 0.033 |
| P0A7K0 | 50S ribosomal protein L11                                          | 14865 | 10.09 | 128.62 | 4 | 11 | 30.28 | 7.63  | 24 | 0 | 15.50 | 0.037 |
| Q7CQJ0 | Stationary phase induced ribosome associated protein               | 5365  | 11.74 | 104.76 | 4 | 3  | 51.06 | 9.70  | 27 | 0 | 16.47 | 0.034 |
| P0A1S0 | Integration host factor subunit alpha                              | 11360 | 9.88  | 201.55 | 4 | 13 | 44.44 | 11.35 | 30 | 0 | 21.81 | 0.039 |
| P0A7X0 | 30S ribosomal protein S8                                           | 14117 | 9.85  | 206.28 | 3 | 12 | 22.31 | 6.91  | 31 | 0 | 15.46 | 0.044 |
| Q7CPZ4 | Protein grpE                                                       | 21827 | 4.49  | 142.04 | 3 | 18 | 38.27 | 8.30  | 18 | 0 | 23.27 | 0.041 |
| P0A1R6 | DNA binding protein HU alpha                                       | 9515  | 10.12 | 480.13 | 3 | 7  | 46.67 | 12.30 | 66 | 0 | 19.21 | 0.030 |
| P0A7V6 | 30S ribosomal protein S3                                           | 25967 | 10.72 | 154.11 | 2 | 20 | 21.03 | 6.52  | 22 | 2 | 17.82 | 0.045 |
| y67286 | UPF0145 protein ybjQ                                               | 11429 | 4.72  | 148.09 | 2 | 14 | 13.08 | 2.99  | 17 | 0 | 17.08 | 0.038 |
| P66491 | 30S ribosomal protein S19                                          | 10409 | 11.00 | 109.40 | 2 | 8  | 25.00 | 7.17  | 12 | 0 | 14.13 | 0.042 |
| Q7CR46 | Anti adapter protein iraP                                          | 9876  | 5.50  | 178.46 | 2 | 7  | 41.86 | 7.28  | 22 | 1 | 18.50 | 0.045 |

| SA123 LC-MS run 1: 123_220709_1a2_01 |                             |         |         |            |          |                      |              |                                |          |                   |                               |                             |
|--------------------------------------|-----------------------------|---------|---------|------------|----------|----------------------|--------------|--------------------------------|----------|-------------------|-------------------------------|-----------------------------|
| Accession                            | Description                 | mW (Da) | pI (pH) | PLGS Score | Peptides | Theoretical Peptides | Coverage (%) | Precursor RMS Mass Error (ppm) | Products | Modified Peptides | Products RMS Mass Error (ppm) | Products RMS RT Error (min) |
| P0A1D3                               | 60 kDa chaperonin           | 57249   | 4.65    | 1428.88    | 39       | 44                   | 82.48        | 8.71                           | 376      | 5                 | 18.00                         | 0.034                       |
| Q56073                               | Chaperone protein dnaK      | 69215   | 4.64    | 621.41     | 31       | 59                   | 62.07        | 8.83                           | 168      | 2                 | 22.25                         | 0.041                       |
| P0A1H3                               | Elongation factor G         | 77550   | 5.00    | 764.17     | 30       | 47                   | 65.34        | 9.82                           | 215      | 2                 | 21.07                         | 0.037                       |
| P41031                               | Thiosulfate binding protein | 37559   | 9.19    | 421.14     | 25       | 32                   | 71.89        | 9.74                           | 173      | 1                 | 22.33                         | 0.039                       |

|        |                                                          |       |       |         |    |    |       |       |     |   |       |       |
|--------|----------------------------------------------------------|-------|-------|---------|----|----|-------|-------|-----|---|-------|-------|
| P0A1H5 | Elongation factor Tu                                     | 43256 | 5.15  | 1486.65 | 25 | 30 | 73.60 | 8.80  | 294 | 2 | 17.09 | 0.035 |
| P65702 | Phosphoglycerate kinase                                  | 41106 | 4.90  | 1107.84 | 24 | 30 | 83.20 | 7.11  | 213 | 0 | 17.80 | 0.036 |
| P06202 | Periplasmic oligopeptide binding protein                 | 61254 | 6.03  | 289.64  | 23 | 42 | 67.04 | 10.95 | 134 | 0 | 23.44 | 0.037 |
| P64076 | Enolase                                                  | 45570 | 5.08  | 1239.06 | 23 | 34 | 75.23 | 7.91  | 301 | 4 | 19.48 | 0.034 |
| P65882 | Adenylosuccinate synthetase                              | 47347 | 5.15  | 427.21  | 21 | 42 | 49.54 | 8.51  | 140 | 3 | 21.02 | 0.039 |
| P64052 | Elongation factor Ts                                     | 30338 | 4.95  | 575.35  | 20 | 33 | 80.92 | 10.02 | 155 | 2 | 17.47 | 0.038 |
| P0A1E3 | Cysteine synthase A                                      | 34514 | 5.72  | 648.33  | 20 | 20 | 64.40 | 8.75  | 193 | 4 | 18.59 | 0.037 |
| P0A1P0 | Glyceraldehyde 3 phosphate dehydrogenase                 | 35564 | 6.36  | 1120.50 | 19 | 29 | 62.54 | 9.00  | 270 | 2 | 16.11 | 0.033 |
| P66932 | Trigger factor                                           | 48036 | 4.64  | 431.91  | 18 | 43 | 49.77 | 10.41 | 106 | 2 | 24.62 | 0.038 |
| P58661 | Aspartate aminotransferase                               | 43494 | 5.29  | 349.11  | 18 | 34 | 45.71 | 8.52  | 85  | 0 | 22.80 | 0.038 |
| Q7CPE2 | ATP synthase subunit beta                                | 50251 | 4.71  | 567.36  | 18 | 32 | 60.00 | 8.58  | 130 | 3 | 20.41 | 0.038 |
| Q7CPE1 | ATP synthase subunit alpha                               | 55078 | 5.61  | 488.39  | 17 | 40 | 56.53 | 8.42  | 119 | 3 | 20.35 | 0.039 |
| P60446 | 50S ribosomal protein L3                                 | 22233 | 10.25 | 314.96  | 17 | 20 | 72.73 | 9.22  | 113 | 0 | 19.88 | 0.040 |
| P77983 | Pyruvate kinase I                                        | 50625 | 5.53  | 294.10  | 17 | 33 | 45.74 | 7.98  | 75  | 0 | 17.82 | 0.040 |
| P0A7W4 | 30S ribosomal protein S5                                 | 17592 | 10.56 | 898.36  | 17 | 13 | 89.22 | 8.83  | 164 | 1 | 16.29 | 0.037 |
| P14845 | Carbamoyl phosphate synthase small chain                 | 41625 | 6.00  | 518.43  | 16 | 27 | 67.02 | 10.36 | 127 | 4 | 20.29 | 0.038 |
| P00499 | ATP phosphoribosyltransferase                            | 33190 | 5.31  | 510.74  | 16 | 24 | 69.57 | 9.83  | 116 | 0 | 22.84 | 0.037 |
| Q8ZL96 | Glycyl tRNA synthetase beta subunit                      | 76405 | 5.35  | 452.35  | 16 | 54 | 38.17 | 11.27 | 118 | 3 | 24.89 | 0.041 |
| P10370 | Histidinol dehydrogenase                                 | 45860 | 4.83  | 406.68  | 16 | 26 | 63.36 | 8.48  | 114 | 1 | 19.96 | 0.035 |
| P40732 | Acetylornithine succinyldiaminopimelate aminotransferase | 43642 | 5.91  | 379.13  | 16 | 24 | 64.20 | 7.44  | 113 | 3 | 21.09 | 0.038 |
| P0A1P6 | Glutamine synthetase                                     | 51752 | 5.25  | 651.91  | 16 | 33 | 49.25 | 9.57  | 115 | 1 | 20.24 | 0.035 |
| P00924 | Enolase 1                                                | 46773 | 6.15  | 421.50  | 15 | 28 | 31.81 | 9.94  | 87  | 0 | 21.53 | 0.036 |
| P63411 | Acetate kinase                                           | 43230 | 5.91  | 404.53  | 15 | 25 | 58.50 | 7.72  | 108 | 1 | 21.86 | 0.039 |
| P05989 | Ketol acid reductoisomerase                              | 53907 | 4.96  | 370.88  | 15 | 47 | 41.34 | 10.31 | 89  | 2 | 21.44 | 0.037 |
| P02936 | Outer membrane protein A                                 | 37491 | 5.50  | 271.79  | 15 | 25 | 49.71 | 7.72  | 83  | 0 | 22.98 | 0.036 |
| Q8ZQT5 | Protein tolB                                             | 46120 | 8.73  | 227.15  | 15 | 21 | 46.28 | 10.39 | 78  | 0 | 20.80 | 0.035 |
| P02910 | Histidine binding periplasmic protein                    | 28361 | 5.95  | 556.67  | 15 | 23 | 66.54 | 7.44  | 141 | 2 | 18.66 | 0.036 |
| Q8ZPD6 | Uncharacterized protein yncE                             | 38480 | 9.55  | 233.86  | 14 | 27 | 41.36 | 10.82 | 80  | 1 | 19.85 | 0.042 |
| P0A1V4 | Adenylate kinase                                         | 23473 | 5.39  | 299.97  | 14 | 24 | 60.75 | 8.13  | 85  | 2 | 17.90 | 0.041 |
| P0A2E1 | Serine hydroxymethyltransferase                          | 45426 | 6.02  | 372.30  | 13 | 36 | 48.44 | 10.35 | 95  | 3 | 21.63 | 0.037 |
| P0A251 | Alkyl hydroperoxide reductase subunit C                  | 20734 | 4.85  | 297.73  | 13 | 16 | 81.82 | 10.99 | 88  | 1 | 19.78 | 0.037 |
| Q9ZF60 | Glutamate aspartate periplasmic binding protein          | 33381 | 9.16  | 270.14  | 13 | 21 | 57.95 | 9.11  | 71  | 1 | 20.80 | 0.043 |
| Q7CR87 | Chaperone surA                                           | 47221 | 6.88  | 225.55  | 13 | 31 | 54.21 | 10.07 | 96  | 2 | 24.49 | 0.043 |
| Q7CQ05 | Autonomous glycyl radical cofactor                       | 14335 | 4.92  | 489.00  | 13 | 15 | 78.74 | 10.06 | 141 | 0 | 13.45 | 0.031 |
| Q8ZP65 | Probable thiol peroxidase                                | 18014 | 4.74  | 605.33  | 12 | 12 | 77.38 | 7.86  | 148 | 1 | 18.25 | 0.031 |
| Q8ZK80 | 50S ribosomal protein L9                                 | 15774 | 7.73  | 562.67  | 12 | 14 | 71.81 | 8.29  | 96  | 0 | 18.88 | 0.034 |
| P26976 | Non specific acid phosphatase                            | 28364 | 9.22  | 451.86  | 12 | 19 | 49.20 | 8.42  | 111 | 4 | 19.90 | 0.037 |
| P66313 | 50S ribosomal protein L6                                 | 18848 | 10.09 | 450.53  | 12 | 13 | 61.58 | 9.14  | 91  | 0 | 18.26 | 0.035 |
| P55900 | Phosphoserine aminotransferase                           | 39806 | 5.17  | 442.18  | 12 | 28 | 54.42 | 9.09  | 103 | 3 | 18.58 | 0.038 |
| O54297 | 30S ribosomal protein S4                                 | 23470 | 10.38 | 422.31  | 12 | 19 | 59.71 | 11.54 | 85  | 1 | 20.60 | 0.037 |
| P0A2C7 | Spermidine putrescine binding periplasmic protein        | 38996 | 4.99  | 396.11  | 12 | 28 | 46.84 | 11.35 | 81  | 2 | 22.07 | 0.033 |
| P66541 | 30S ribosomal protein S2                                 | 26741 | 6.73  | 366.29  | 12 | 23 | 70.12 | 10.62 | 93  | 2 | 20.52 | 0.038 |
| P0A1A5 | Branched chain amino acid aminotransferase               | 34031 | 5.47  | 322.51  | 12 | 26 | 49.19 | 7.58  | 78  | 2 | 19.92 | 0.038 |
| P65215 | 2 dehydro 3 deoxyphosphooctonate aldolase                | 30775 | 5.86  | 313.33  | 12 | 25 | 56.34 | 9.38  | 82  | 1 | 21.62 | 0.041 |
| P0A2A3 | 50S ribosomal protein L1                                 | 24713 | 10.10 | 788.61  | 12 | 19 | 51.28 | 7.48  | 137 | 3 | 17.19 | 0.034 |
| P0A7Z7 | DNA directed RNA polymerase subunit alpha                | 36489 | 4.78  | 397.63  | 11 | 28 | 46.50 | 11.41 | 79  | 1 | 20.85 | 0.037 |
| Q8ZQS2 | 2 3 bisposphoglycerate dependent phosphoglycerate mutase | 28475 | 5.71  | 259.40  | 11 | 19 | 51.60 | 10.46 | 62  | 1 | 21.08 | 0.040 |
| P26982 | Protease do                                              | 49284 | 9.19  | 250.92  | 11 | 29 | 32.00 | 11.93 | 97  | 5 | 26.45 | 0.042 |

|        |                                                                                               |       |       |        |    |    |       |       |     |   |       |       |
|--------|-----------------------------------------------------------------------------------------------|-------|-------|--------|----|----|-------|-------|-----|---|-------|-------|
| P0A2B3 | 30S ribosomal protein S7                                                                      | 17579 | 10.73 | 228.42 | 11 | 10 | 67.31 | 9.67  | 89  | 0 | 16.86 | 0.034 |
| P65692 | 6 phosphofructokinase                                                                         | 34892 | 5.47  | 219.23 | 11 | 28 | 57.50 | 9.81  | 49  | 1 | 23.06 | 0.038 |
| P65889 | Phosphoribosylaminoimidazole succinocarboxamide synthase                                      | 26890 | 5.02  | 199.34 | 11 | 19 | 46.41 | 9.62  | 70  | 1 | 21.01 | 0.038 |
| P25077 | Malate dehydrogenase                                                                          | 32455 | 5.97  | 424.76 | 11 | 22 | 52.56 | 6.76  | 79  | 2 | 15.66 | 0.035 |
| Q8ZRN1 | D methionine binding lipoprotein metQ                                                         | 29417 | 5.23  | 302.51 | 10 | 30 | 52.40 | 11.21 | 59  | 0 | 24.06 | 0.039 |
| P10372 | 1 5 phosphoribosyl 5 5 phosphoribosylamino methylideneamino imidazole 4 carboxamide isomerase | 26072 | 5.50  | 280.23 | 10 | 19 | 54.29 | 9.68  | 57  | 0 | 21.80 | 0.036 |
| P0A1S0 | Integration host factor subunit alpha                                                         | 11360 | 9.88  | 277.06 | 10 | 13 | 60.61 | 10.31 | 57  | 0 | 20.35 | 0.037 |
| P65226 | Homoserine kinase                                                                             | 33264 | 6.32  | 217.47 | 10 | 21 | 55.34 | 8.16  | 69  | 1 | 23.83 | 0.038 |
| P0AA02 | Transcription antitermination protein nusG                                                    | 20532 | 6.40  | 206.71 | 10 | 13 | 61.88 | 9.23  | 59  | 0 | 20.86 | 0.040 |
| Q8ZRX8 | Dihydrodipicolinate reductase                                                                 | 28832 | 5.73  | 195.39 | 10 | 24 | 64.84 | 10.43 | 56  | 3 | 23.59 | 0.038 |
| P0A297 | 50S ribosomal protein L10                                                                     | 17789 | 9.46  | 416.21 | 10 | 15 | 59.39 | 9.75  | 89  | 2 | 20.63 | 0.036 |
| P67904 | 30S ribosomal protein S10                                                                     | 11759 | 10.33 | 333.66 | 9  | 11 | 58.25 | 7.69  | 61  | 0 | 18.70 | 0.035 |
| P66593 | 30S ribosomal protein S6                                                                      | 15163 | 5.08  | 311.95 | 9  | 9  | 70.99 | 10.29 | 77  | 2 | 17.43 | 0.038 |
| P69936 | NADP dependent L serine L allo threonine dehydrogenase ydfG                                   | 27025 | 5.78  | 258.31 | 9  | 19 | 72.58 | 10.44 | 71  | 2 | 22.54 | 0.043 |
| P16657 | Enoyl acyl carrier protein reductase NADH                                                     | 27742 | 5.47  | 243.51 | 9  | 21 | 46.95 | 10.63 | 78  | 2 | 24.75 | 0.040 |
| P0A2M5 | Uracil phosphoribosyltransferase                                                              | 22518 | 5.17  | 237.82 | 9  | 16 | 53.85 | 10.62 | 49  | 0 | 20.34 | 0.034 |
| P10367 | Histidine biosynthesis bifunctional protein hisIE                                             | 22660 | 5.37  | 232.86 | 9  | 15 | 79.31 | 9.20  | 70  | 2 | 25.33 | 0.041 |
| P0A1V6 | Ribose phosphate pyrophosphokinase                                                            | 34194 | 5.06  | 212.16 | 9  | 19 | 35.87 | 10.98 | 45  | 0 | 24.84 | 0.041 |
| P0A2F6 | Single stranded DNA binding protein                                                           | 19062 | 5.29  | 162.80 | 9  | 11 | 54.55 | 8.78  | 54  | 1 | 17.42 | 0.034 |
| P66738 | Ribosome recycling factor                                                                     | 20542 | 8.60  | 138.97 | 9  | 16 | 48.11 | 6.00  | 53  | 0 | 20.75 | 0.043 |
| Q8ZKP7 | Triosephosphate isomerase                                                                     | 26899 | 5.61  | 416.96 | 9  | 22 | 57.65 | 8.84  | 136 | 2 | 18.78 | 0.031 |
| P0A283 | Glucose specific phosphotransferase enzyme IIA component                                      | 18235 | 4.54  | 430.36 | 8  | 12 | 44.38 | 11.29 | 100 | 0 | 19.72 | 0.033 |
| P0A1R2 | Imidazole glycerol phosphate synthase subunit hisF                                            | 28350 | 4.80  | 366.26 | 8  | 20 | 46.51 | 7.80  | 56  | 1 | 22.51 | 0.042 |
| P0A7K0 | 50S ribosomal protein L11                                                                     | 14865 | 10.09 | 267.45 | 8  | 11 | 63.38 | 11.35 | 74  | 1 | 19.30 | 0.032 |
| Q56026 | Cell invasion protein sipD                                                                    | 37089 | 4.83  | 265.98 | 8  | 24 | 47.81 | 11.03 | 69  | 3 | 23.03 | 0.040 |
| P0A1Z2 | Chaperone protein skp                                                                         | 17894 | 10.25 | 245.59 | 8  | 10 | 71.43 | 6.75  | 69  | 1 | 21.25 | 0.037 |
| Q7CPL6 | 50S ribosomal protein L18                                                                     | 12761 | 10.88 | 243.07 | 8  | 9  | 64.10 | 10.55 | 58  | 0 | 18.88 | 0.038 |
| Q7CPL7 | 50S ribosomal protein L17                                                                     | 14385 | 11.46 | 195.22 | 8  | 8  | 47.24 | 9.56  | 44  | 0 | 18.73 | 0.032 |
| Q8ZQR4 | 6 phosphogluconolactonase                                                                     | 36314 | 5.07  | 182.77 | 8  | 18 | 55.29 | 8.79  | 60  | 2 | 22.29 | 0.041 |
| Q8ZRC9 | UPF0234 protein yajQ                                                                          | 18307 | 5.42  | 166.88 | 8  | 14 | 58.28 | 10.44 | 42  | 0 | 22.61 | 0.038 |
| Q8ZQ40 | Flavoprotein wrbA                                                                             | 20854 | 5.74  | 155.39 | 8  | 12 | 73.23 | 12.31 | 67  | 1 | 20.14 | 0.038 |
| P0A1D5 | 10 kDa chaperonin                                                                             | 10311 | 5.19  | 525.38 | 8  | 7  | 74.23 | 7.15  | 98  | 0 | 18.59 | 0.032 |
| P0AA28 | Thioredoxin 1                                                                                 | 11799 | 4.47  | 398.66 | 7  | 8  | 65.14 | 8.89  | 82  | 1 | 15.38 | 0.032 |
| Q8ZRP4 | 2 3 4 5 tetrahydropyridine 2 6 dicarboxylate N succinyltransferase                            | 29833 | 5.39  | 334.07 | 7  | 25 | 39.42 | 7.98  | 67  | 3 | 21.40 | 0.039 |
| P0A299 | 50S ribosomal protein L7 L12                                                                  | 12291 | 4.40  | 324.35 | 7  | 20 | 55.37 | 6.23  | 51  | 1 | 15.95 | 0.039 |
| P0A2H9 | Thiol disulfide interchange protein dsbA                                                      | 22896 | 5.55  | 319.39 | 7  | 14 | 50.72 | 5.22  | 72  | 1 | 19.89 | 0.037 |
| P22107 | TraT complement resistance protein                                                            | 26261 | 9.35  | 250.06 | 7  | 18 | 45.68 | 7.84  | 58  | 1 | 20.64 | 0.036 |
| P14146 | Virulence transcriptional regulatory protein phoP                                             | 25617 | 5.14  | 244.23 | 7  | 21 | 47.77 | 10.40 | 64  | 3 | 21.87 | 0.038 |
| P0A2C9 | 3 oxoacyl acyl carrier protein reductase                                                      | 25529 | 7.19  | 241.87 | 7  | 16 | 52.05 | 12.93 | 55  | 1 | 22.46 | 0.037 |
| Q9L9I8 | Thiamine phosphate pyrophosphorylase                                                          | 22969 | 4.95  | 237.82 | 7  | 16 | 44.55 | 8.93  | 43  | 0 | 18.35 | 0.040 |
| P66032 | 3 4 dihydroxy 2 butanone 4 phosphate synthase                                                 | 23295 | 4.70  | 231.91 | 7  | 15 | 47.93 | 11.48 | 55  | 1 | 23.11 | 0.035 |
| O54296 | 30S ribosomal protein S11                                                                     | 13822 | 11.74 | 218.56 | 7  | 9  | 58.14 | 10.86 | 48  | 0 | 19.62 | 0.036 |
| Q8ZLJ2 | Transcription elongation factor greB                                                          | 18497 | 6.89  | 175.78 | 7  | 17 | 42.04 | 12.03 | 49  | 1 | 24.89 | 0.035 |
| P0A2C1 | Ribonuclease HII                                                                              | 21493 | 7.63  | 166.97 | 7  | 17 | 45.45 | 9.78  | 57  | 2 | 24.10 | 0.039 |
| Q7CQC4 | tRNA cmo5U34 methyltransferase                                                                | 27830 | 5.73  | 145.52 | 7  | 20 | 42.11 | 11.77 | 42  | 1 | 20.75 | 0.042 |
| Q7CPP7 | 50S ribosomal protein L21                                                                     | 11571 | 10.29 | 104.09 | 7  | 7  | 62.14 | 13.30 | 37  | 1 | 21.64 | 0.035 |

|        |                                         |       |       |        |   |    |       |       |     |   |       |       |
|--------|-----------------------------------------|-------|-------|--------|---|----|-------|-------|-----|---|-------|-------|
| P0A1S2 | DNA binding protein H NS                | 15532 | 5.09  | 446.81 | 7 | 14 | 52.55 | 6.63  | 105 | 1 | 15.89 | 0.034 |
| Q7CPL5 | 50S ribosomal protein L14               | 13559 | 10.89 | 186.77 | 6 | 14 | 38.21 | 9.30  | 55  | 0 | 24.93 | 0.035 |
| P67617 | Probable Fe 2 trafficking protein       | 10892 | 5.87  | 183.84 | 6 | 15 | 82.42 | 9.77  | 53  | 0 | 24.21 | 0.029 |
| P67605 | UPF0265 protein yeeX                    | 13064 | 9.60  | 182.80 | 6 | 8  | 57.66 | 8.61  | 31  | 0 | 20.77 | 0.041 |
| P0AA07 | Phosphocarrier protein HPr              | 9113  | 5.51  | 172.34 | 6 | 7  | 89.41 | 9.24  | 87  | 0 | 19.39 | 0.036 |
| P66193 | 50S ribosomal protein L31 type B        | 9808  | 9.67  | 130.43 | 6 | 9  | 81.40 | 9.41  | 58  | 0 | 17.79 | 0.038 |
| Q7CPZ4 | Protein grpE                            | 21827 | 4.49  | 122.64 | 6 | 18 | 48.98 | 4.34  | 43  | 0 | 18.34 | 0.040 |
| P61179 | 50S ribosomal protein L22               | 12218 | 10.71 | 116.14 | 6 | 8  | 54.55 | 10.36 | 33  | 1 | 20.88 | 0.033 |
| P0A1R6 | DNA binding protein HU alpha            | 9515  | 10.12 | 282.07 | 6 | 7  | 62.22 | 8.27  | 64  | 1 | 18.76 | 0.036 |
| P66491 | 30S ribosomal protein S19               | 10409 | 11.00 | 91.11  | 5 | 8  | 58.70 | 12.38 | 33  | 1 | 22.37 | 0.046 |
| P66643 | 30S ribosomal protein S9                | 14817 | 11.34 | 297.82 | 5 | 14 | 38.46 | 9.53  | 48  | 1 | 20.44 | 0.036 |
| P0A7X0 | 30S ribosomal protein S8                | 14117 | 9.85  | 213.77 | 4 | 12 | 32.31 | 10.27 | 36  | 0 | 14.24 | 0.036 |
| P0A2A9 | 30S ribosomal protein S16               | 9229  | 11.05 | 163.18 | 4 | 6  | 36.59 | 9.57  | 28  | 0 | 13.80 | 0.037 |
| P66038 | 6 7 dimethyl 8 ribityllumazine synthase | 15998 | 4.91  | 430.00 | 4 | 8  | 45.51 | 9.41  | 65  | 1 | 18.18 | 0.031 |
| P60626 | 50S ribosomal protein L24               | 11309 | 10.72 | 129.65 | 3 | 11 | 28.85 | 10.40 | 15  | 0 | 20.04 | 0.037 |
| P0A2B1 | 30S ribosomal protein S20               | 9649  | 11.63 | 154.09 | 3 | 3  | 27.59 | 7.01  | 31  | 0 | 15.78 | 0.036 |

| SA123 LC-MS run 2: 123_220709_1a2_02 |                                                          |         |         |            |          |                      |              |                                |          |                   |                               |                             |
|--------------------------------------|----------------------------------------------------------|---------|---------|------------|----------|----------------------|--------------|--------------------------------|----------|-------------------|-------------------------------|-----------------------------|
| Accession                            | Description                                              | mW (Da) | pI (pH) | PLGS Score | Peptides | Theoretical Peptides | Coverage (%) | Precursor RMS Mass Error (ppm) | Products | Modified Peptides | Products RMS Mass Error (ppm) | Products RMS RT Error (min) |
| P0A1D3                               | 60 kDa chaperonin                                        | 57249   | 4.65    | 1208.85    | 33       | 44                   | 76.09        | 7.02                           | 285      | 4                 | 17.94                         | 0.048                       |
| Q56073                               | Chaperone protein dnaK                                   | 69215   | 4.64    | 678.92     | 28       | 59                   | 57.68        | 8.63                           | 195      | 5                 | 20.90                         | 0.055                       |
| P64076                               | Enolase                                                  | 45570   | 5.08    | 1274.79    | 22       | 34                   | 69.21        | 7.04                           | 240      | 1                 | 18.27                         | 0.046                       |
| P0A1H5                               | Elongation factor Tu                                     | 43256   | 5.15    | 1511.82    | 22       | 30                   | 75.13        | 10.43                          | 306      | 3                 | 18.08                         | 0.047                       |
| P0A1P6                               | Glutamine synthetase                                     | 51752   | 5.25    | 483.84     | 20       | 33                   | 56.08        | 10.49                          | 130      | 1                 | 22.22                         | 0.049                       |
| P65702                               | Phosphoglycerate kinase                                  | 41106   | 4.90    | 985.14     | 20       | 30                   | 71.32        | 8.30                           | 189      | 0                 | 17.57                         | 0.046                       |
| P0A1H3                               | Elongation factor G                                      | 77550   | 5.00    | 548.52     | 19       | 47                   | 43.61        | 8.40                           | 113      | 1                 | 24.20                         | 0.053                       |
| P0A1E3                               | Cysteine synthase A                                      | 34514   | 5.72    | 516.53     | 17       | 20                   | 68.73        | 6.05                           | 132      | 2                 | 19.37                         | 0.049                       |
| P66932                               | Trigger factor                                           | 48036   | 4.64    | 435.33     | 17       | 43                   | 45.37        | 11.03                          | 88       | 0                 | 22.08                         | 0.057                       |
| Q7CPE1                               | ATP synthase subunit alpha                               | 55078   | 5.61    | 404.87     | 17       | 40                   | 52.24        | 10.32                          | 107      | 3                 | 22.30                         | 0.054                       |
| P0A1P0                               | Glyceraldehyde 3 phosphate dehydrogenase                 | 35564   | 6.36    | 1075.34    | 17       | 29                   | 64.05        | 9.30                           | 217      | 0                 | 17.96                         | 0.043                       |
| P14845                               | Carbamoyl phosphate synthase small chain                 | 41625   | 6.00    | 448.82     | 16       | 27                   | 60.99        | 9.53                           | 98       | 1                 | 22.08                         | 0.053                       |
| P00924                               | Enolase 1                                                | 46773   | 6.15    | 369.27     | 16       | 28                   | 44.85        | 8.42                           | 91       | 4                 | 23.19                         | 0.056                       |
| P06202                               | Periplasmic oligopeptide binding protein                 | 61254   | 6.03    | 261.50     | 16       | 42                   | 49.91        | 7.53                           | 85       | 0                 | 23.17                         | 0.050                       |
| P00499                               | ATP phosphoribosyltransferase                            | 33190   | 5.31    | 579.71     | 16       | 24                   | 63.21        | 9.11                           | 124      | 1                 | 19.45                         | 0.049                       |
| P40732                               | Acetylornithine succinyldiaminopimelate aminotransferase | 43642   | 5.91    | 388.52     | 15       | 24                   | 58.02        | 11.30                          | 94       | 1                 | 24.74                         | 0.057                       |
| P41031                               | Thiosulfate binding protein                              | 37559   | 9.19    | 366.33     | 15       | 32                   | 54.44        | 8.01                           | 86       | 1                 | 16.09                         | 0.056                       |
| P0A1V4                               | Adenylate kinase                                         | 23473   | 5.39    | 226.31     | 15       | 24                   | 55.14        | 8.98                           | 66       | 0                 | 19.16                         | 0.052                       |
| P64052                               | Elongation factor Ts                                     | 30338   | 4.95    | 524.88     | 15       | 33                   | 57.95        | 9.92                           | 115      | 2                 | 20.96                         | 0.057                       |
| P0A2C7                               | Spermidine putrescine binding periplasmic protein        | 38996   | 4.99    | 318.32     | 14       | 28                   | 60.06        | 11.71                          | 70       | 1                 | 22.40                         | 0.055                       |
| P66955                               | Transaldolase B                                          | 35149   | 4.91    | 302.17     | 14       | 26                   | 59.31        | 7.66                           | 76       | 0                 | 21.83                         | 0.057                       |
| P55900                               | Phosphoserine aminotransferase                           | 39806   | 5.17    | 248.71     | 14       | 28                   | 48.07        | 10.42                          | 67       | 0                 | 29.09                         | 0.064                       |
| P02936                               | Outer membrane protein A                                 | 37491   | 5.50    | 226.23     | 14       | 25                   | 34.57        | 9.40                           | 80       | 0                 | 20.99                         | 0.057                       |
| P41782                               | Transcriptional regulator hiiD                           | 35195   | 8.77    | 208.31     | 14       | 29                   | 51.46        | 10.24                          | 65       | 0                 | 23.07                         | 0.053                       |
| Q7CPE2                               | ATP synthase subunit beta                                | 50251   | 4.71    | 540.90     | 14       | 32                   | 42.39        | 9.91                           | 99       | 4                 | 21.00                         | 0.053                       |
| Q8ZRN1                               | D methionine binding lipoprotein metQ                    | 29417   | 5.23    | 270.23     | 13       | 30                   | 64.58        | 8.18                           | 57       | 0                 | 27.48                         | 0.061                       |
| Q9L4T0                               | S ribosylhomocysteine lyase                              | 19295   | 5.68    | 229.32     | 13       | 15                   | 87.72        | 10.14                          | 91       | 2                 | 24.54                         | 0.056                       |

|        |                                                                                              |       |       |        |    |    |       |       |     |   |       |       |
|--------|----------------------------------------------------------------------------------------------|-------|-------|--------|----|----|-------|-------|-----|---|-------|-------|
| Q9L6N1 | 5 methyltetrahydropteroyltriglutamate homocysteine methyltransferase                         | 84615 | 5.67  | 408.24 | 13 | 60 | 24.54 | 8.70  | 67  | 1 | 23.60 | 0.053 |
| P02910 | Histidine binding periplasmic protein                                                        | 28361 | 5.95  | 399.62 | 12 | 23 | 53.08 | 9.15  | 81  | 0 | 20.63 | 0.049 |
| P0A2E1 | Serine hydroxymethyltransferase                                                              | 45426 | 6.02  | 395.96 | 12 | 36 | 35.97 | 7.71  | 104 | 3 | 19.70 | 0.057 |
| P0A7Z7 | DNA directed RNA polymerase subunit alpha                                                    | 36489 | 4.78  | 305.23 | 12 | 28 | 44.07 | 10.29 | 61  | 0 | 20.70 | 0.051 |
| P26976 | Non specific acid phosphatase                                                                | 28364 | 9.22  | 302.19 | 12 | 19 | 59.20 | 9.60  | 73  | 1 | 21.51 | 0.053 |
| P60446 | 50S ribosomal protein L3                                                                     | 22233 | 10.25 | 295.53 | 12 | 20 | 59.33 | 11.54 | 77  | 2 | 18.54 | 0.051 |
| Q7CQ05 | Autonomous glycyl radical cofactor                                                           | 14335 | 4.92  | 446.25 | 12 | 15 | 85.04 | 9.97  | 139 | 0 | 15.08 | 0.041 |
| Q8ZP65 | Probable thiol peroxidase                                                                    | 18014 | 4.74  | 696.32 | 11 | 12 | 92.86 | 7.66  | 159 | 1 | 17.34 | 0.045 |
| P0A297 | 50S ribosomal protein L10                                                                    | 17789 | 9.46  | 442.58 | 11 | 15 | 64.85 | 8.13  | 76  | 0 | 19.24 | 0.054 |
| P66541 | 30S ribosomal protein S2                                                                     | 26741 | 6.73  | 329.34 | 11 | 23 | 68.46 | 9.37  | 79  | 1 | 18.58 | 0.046 |
| P0A1F8 | Aspartate semialdehyde dehydrogenase                                                         | 40110 | 5.21  | 301.55 | 11 | 27 | 62.23 | 6.26  | 60  | 1 | 19.41 | 0.053 |
| Q9ZF60 | Glutamate aspartate periplasmic binding protein                                              | 33381 | 9.16  | 234.99 | 11 | 21 | 57.62 | 7.47  | 68  | 1 | 20.36 | 0.052 |
| P65215 | 2 dehydro 3 deoxyphosphooctonate aldolase                                                    | 30775 | 5.86  | 184.60 | 11 | 25 | 64.08 | 10.94 | 58  | 2 | 24.47 | 0.055 |
| Q8ZQT5 | Protein tolB                                                                                 | 46120 | 8.73  | 160.01 | 11 | 21 | 41.16 | 9.81  | 60  | 1 | 22.18 | 0.049 |
| P0A7W4 | 30S ribosomal protein S5                                                                     | 17592 | 10.56 | 828.43 | 11 | 13 | 70.66 | 9.66  | 122 | 1 | 18.38 | 0.036 |
| P0A1S2 | DNA binding protein H NS                                                                     | 15532 | 5.09  | 602.39 | 10 | 14 | 62.77 | 6.69  | 116 | 0 | 15.76 | 0.042 |
| O54297 | 30S ribosomal protein S4                                                                     | 23470 | 10.38 | 420.33 | 10 | 19 | 47.09 | 8.09  | 76  | 1 | 19.93 | 0.050 |
| P40810 | Dihydroxy acid dehydratase                                                                   | 65660 | 5.73  | 301.03 | 10 | 41 | 23.86 | 9.26  | 46  | 0 | 23.33 | 0.058 |
| Q8ZRP4 | 2 3 4 5 tetrahydropyridine 2 6 dicarboxylate N succinyltransferase                           | 29833 | 5.39  | 299.89 | 10 | 25 | 35.04 | 5.79  | 55  | 0 | 20.11 | 0.051 |
| Q8ZPD6 | Uncharacterized protein yncE                                                                 | 38480 | 9.55  | 259.41 | 10 | 27 | 35.98 | 9.93  | 58  | 1 | 21.75 | 0.056 |
| P37418 | 2 succinylbenzoate CoA ligase                                                                | 50212 | 7.80  | 213.56 | 10 | 35 | 36.04 | 13.09 | 53  | 1 | 25.39 | 0.062 |
| P60726 | 50S ribosomal protein L4                                                                     | 22072 | 10.19 | 192.79 | 10 | 18 | 62.69 | 8.21  | 64  | 3 | 24.74 | 0.053 |
| P0A2A3 | 50S ribosomal protein L1                                                                     | 24713 | 10.10 | 616.85 | 10 | 19 | 57.69 | 5.98  | 96  | 0 | 20.97 | 0.045 |
| Q7CR87 | Chaperone surA                                                                               | 47221 | 6.88  | 195.22 | 9  | 31 | 36.22 | 7.89  | 48  | 0 | 21.09 | 0.049 |
| P58661 | Aspartate aminotransferase                                                                   | 43494 | 5.29  | 192.04 | 9  | 34 | 38.89 | 10.36 | 49  | 1 | 26.18 | 0.052 |
| Q8ZN71 | Dihydrodipicolinate synthase                                                                 | 31274 | 5.61  | 187.12 | 9  | 21 | 48.63 | 11.20 | 46  | 1 | 24.51 | 0.060 |
| P0A1R2 | Imidazole glycerol phosphate synthase subunit hisF                                           | 28350 | 4.80  | 167.59 | 9  | 20 | 54.65 | 9.17  | 49  | 1 | 20.02 | 0.055 |
| Q9L6M9 | Putative carboxymethylenebutenolidase                                                        | 29043 | 5.59  | 198.95 | 9  | 18 | 70.00 | 11.76 | 59  | 1 | 22.67 | 0.053 |
| P0A283 | Glucose specific phosphotransferase enzyme IIA component                                     | 18235 | 4.54  | 325.61 | 8  | 12 | 66.86 | 9.07  | 61  | 0 | 20.93 | 0.051 |
| Q8ZKP7 | Triosephosphate isomerase                                                                    | 26899 | 5.61  | 322.06 | 8  | 22 | 54.51 | 7.50  | 103 | 1 | 18.01 | 0.046 |
| P25077 | Malate dehydrogenase                                                                         | 32455 | 5.97  | 316.48 | 8  | 22 | 39.42 | 5.94  | 70  | 0 | 16.64 | 0.043 |
| P0A1A5 | Branched chain amino acid aminotransferase                                                   | 34031 | 5.47  | 312.91 | 8  | 26 | 38.51 | 10.11 | 52  | 2 | 21.05 | 0.051 |
| P0A299 | 50S ribosomal protein L7 L12                                                                 | 12291 | 4.40  | 306.95 | 8  | 20 | 90.08 | 9.04  | 66  | 1 | 20.65 | 0.056 |
| P66032 | 3 4 dihydroxy 2 butanone 4 phosphate synthase                                                | 23295 | 4.70  | 285.24 | 8  | 15 | 57.14 | 9.98  | 47  | 0 | 25.51 | 0.058 |
| P14146 | Virulence transcriptional regulatory protein phoP                                            | 25617 | 5.14  | 244.42 | 8  | 21 | 58.48 | 12.54 | 52  | 2 | 22.72 | 0.048 |
| P0A2M5 | Uracil phosphoribosyltransferase                                                             | 22518 | 5.17  | 225.54 | 8  | 16 | 63.94 | 6.48  | 43  | 1 | 19.83 | 0.053 |
| P16326 | Flagellar hook associated protein 3                                                          | 34153 | 4.64  | 223.30 | 8  | 21 | 51.42 | 11.41 | 53  | 2 | 24.42 | 0.068 |
| P37412 | 3 isopropylmalate dehydrogenase                                                              | 39488 | 5.14  | 198.37 | 8  | 25 | 30.30 | 9.90  | 43  | 0 | 25.22 | 0.057 |
| P65889 | Phosphoribosylaminoimidazole succinocarboxamide synthase                                     | 26890 | 5.02  | 195.98 | 8  | 19 | 40.93 | 7.53  | 38  | 0 | 25.18 | 0.052 |
| P0A2F6 | Single stranded DNA binding protein                                                          | 19062 | 5.29  | 189.55 | 8  | 11 | 52.84 | 7.94  | 52  | 1 | 21.27 | 0.055 |
| P02906 | Sulfate binding protein                                                                      | 36517 | 7.72  | 181.85 | 8  | 28 | 37.69 | 4.58  | 42  | 1 | 18.24 | 0.055 |
| P66193 | 50S ribosomal protein L31 type B                                                             | 9808  | 9.67  | 174.67 | 8  | 9  | 83.72 | 9.25  | 52  | 0 | 15.01 | 0.049 |
| P0A2C5 | D ribose binding periplasmic protein                                                         | 30943 | 9.20  | 162.64 | 8  | 25 | 47.30 | 8.47  | 47  | 1 | 21.39 | 0.053 |
| P10372 | 1 5 phosphoribosyl 5 5 phosphoribosylamino methylidenamino imidazole 4 carboxamide isomerase | 26072 | 5.50  | 161.14 | 8  | 19 | 54.69 | 12.92 | 39  | 0 | 23.16 | 0.040 |
| P0A251 | Alkyl hydroperoxide reductase subunit C                                                      | 20734 | 4.85  | 505.41 | 8  | 16 | 74.33 | 9.63  | 70  | 0 | 19.93 | 0.050 |
| P66313 | 50S ribosomal protein L6                                                                     | 18848 | 10.09 | 378.23 | 7  | 13 | 45.20 | 6.51  | 56  | 0 | 16.61 | 0.050 |

|        |                                                             |       |       |        |   |    |       |       |    |   |       |       |
|--------|-------------------------------------------------------------|-------|-------|--------|---|----|-------|-------|----|---|-------|-------|
| P63411 | Acetate kinase                                              | 43230 | 5.91  | 355.41 | 7 | 25 | 33.75 | 7.13  | 52 | 1 | 21.48 | 0.055 |
| P58580 | Glutathione synthetase                                      | 35410 | 4.88  | 231.12 | 7 | 29 | 35.56 | 6.88  | 40 | 1 | 20.61 | 0.063 |
| P69936 | NADP dependent L serine L allo threonine dehydrogenase ydfG | 27025 | 5.78  | 215.20 | 7 | 19 | 50.40 | 8.64  | 39 | 1 | 22.26 | 0.058 |
| P66643 | 30S ribosomal protein S9                                    | 14817 | 11.34 | 191.75 | 7 | 14 | 56.15 | 6.47  | 40 | 0 | 20.47 | 0.045 |
| P67617 | Probable Fe 2 trafficking protein                           | 10892 | 5.87  | 189.98 | 7 | 15 | 80.22 | 9.95  | 36 | 0 | 21.94 | 0.046 |
| P0A1Z2 | Chaperone protein skp                                       | 17894 | 10.25 | 152.91 | 7 | 10 | 60.87 | 6.62  | 46 | 2 | 18.37 | 0.056 |
| Q7CPD8 | UPF0438 protein yifE                                        | 13069 | 6.23  | 136.80 | 7 | 13 | 40.18 | 9.36  | 31 | 0 | 24.09 | 0.045 |
| Q9L9I8 | Thiamine phosphate pyrophosphorylase                        | 22969 | 4.95  | 132.87 | 7 | 16 | 50.71 | 8.25  | 30 | 0 | 24.53 | 0.053 |
| P65559 | Uncharacterized Nudix hydrolase yfcD                        | 20893 | 4.48  | 68.59  | 7 | 12 | 47.83 | 11.23 | 34 | 1 | 21.25 | 0.061 |
| Q8ZK80 | 50S ribosomal protein L9                                    | 15774 | 7.73  | 457.63 | 7 | 14 | 56.38 | 7.89  | 65 | 0 | 21.06 | 0.045 |
| P66038 | 6 7 dimethyl 8 ribityllumazine synthase                     | 15998 | 4.91  | 356.51 | 6 | 8  | 54.49 | 8.85  | 60 | 0 | 19.60 | 0.047 |
| P0A9Y9 | Cold shock like protein cspC                                | 7397  | 7.70  | 325.26 | 6 | 5  | 78.26 | 6.56  | 50 | 0 | 15.44 | 0.050 |
| Q7CPL5 | 50S ribosomal protein L14                                   | 13559 | 10.89 | 215.45 | 6 | 14 | 47.97 | 11.22 | 44 | 1 | 18.90 | 0.047 |
| P66593 | 30S ribosomal protein S6                                    | 15163 | 5.08  | 209.99 | 6 | 9  | 75.57 | 12.52 | 44 | 1 | 17.48 | 0.045 |
| O54296 | 30S ribosomal protein S11                                   | 13822 | 11.74 | 208.80 | 6 | 9  | 66.67 | 8.10  | 45 | 1 | 19.83 | 0.059 |
| Q7CPL6 | 50S ribosomal protein L18                                   | 12761 | 10.88 | 175.93 | 6 | 9  | 54.70 | 10.49 | 35 | 1 | 21.09 | 0.054 |
| P0A2F4 | Superoxide dismutase Fe                                     | 21294 | 5.52  | 175.73 | 6 | 14 | 43.52 | 10.38 | 43 | 1 | 24.08 | 0.054 |
| P0A7V6 | 30S ribosomal protein S3                                    | 25967 | 10.72 | 161.81 | 6 | 20 | 39.49 | 10.29 | 36 | 0 | 24.52 | 0.047 |
| P0A1W6 | Leucine specific binding protein                            | 39375 | 5.84  | 149.15 | 6 | 27 | 28.73 | 10.10 | 28 | 0 | 24.02 | 0.064 |
| P66692 | Ribose 5 phosphate isomerase A                              | 22881 | 4.89  | 135.05 | 6 | 15 | 42.47 | 10.05 | 34 | 0 | 22.28 | 0.050 |
| P02911 | Lysine arginine ornithine binding periplasmic protein       | 28182 | 5.90  | 124.30 | 6 | 23 | 31.54 | 8.37  | 28 | 0 | 20.22 | 0.055 |
| P61179 | 50S ribosomal protein L22                                   | 12218 | 10.71 | 108.50 | 6 | 8  | 52.73 | 8.86  | 40 | 2 | 19.33 | 0.039 |
| P0A1D5 | 10 kDa chaperonin                                           | 10311 | 5.19  | 617.26 | 6 | 7  | 74.23 | 7.79  | 97 | 0 | 16.79 | 0.043 |
| P67904 | 30S ribosomal protein S10                                   | 11759 | 10.33 | 255.69 | 5 | 11 | 51.46 | 9.47  | 39 | 1 | 16.66 | 0.045 |
| Q8ZLM1 | 30S ribosomal protein S13                                   | 13153 | 11.22 | 246.84 | 5 | 12 | 40.68 | 9.36  | 41 | 0 | 21.38 | 0.051 |
| P0A2A1 | 50S ribosomal protein L19                                   | 13122 | 11.24 | 169.51 | 5 | 11 | 40.00 | 11.33 | 35 | 0 | 22.33 | 0.055 |
| Q7CPL7 | 50S ribosomal protein L17                                   | 14385 | 11.46 | 153.32 | 5 | 8  | 37.80 | 8.14  | 26 | 0 | 20.63 | 0.051 |
| P0A2H9 | Thiol disulfide interchange protein dsbA                    | 22896 | 5.55  | 150.68 | 5 | 14 | 40.10 | 7.03  | 54 | 2 | 21.27 | 0.060 |
| P0A1S4 | DNA binding protein stpA                                    | 15477 | 9.24  | 146.66 | 5 | 12 | 42.11 | 8.80  | 24 | 0 | 26.51 | 0.055 |
| P0AA28 | Thioredoxin 1                                               | 11799 | 4.47  | 406.33 | 5 | 8  | 49.54 | 7.75  | 76 | 0 | 16.65 | 0.045 |
| Q7CPL4 | 50S ribosomal protein L16                                   | 15184 | 11.65 | 220.70 | 4 | 6  | 27.94 | 13.26 | 32 | 0 | 20.19 | 0.047 |
| P67093 | Universal stress protein G                                  | 15891 | 6.20  | 195.67 | 4 | 9  | 44.37 | 10.91 | 37 | 2 | 20.29 | 0.054 |
| P53636 | Superoxide dismutase Cu Zn 1                                | 18358 | 6.55  | 179.18 | 4 | 10 | 28.25 | 7.83  | 22 | 0 | 12.43 | 0.056 |
| P67605 | UPF0265 protein yeeX                                        | 13064 | 9.60  | 147.78 | 4 | 8  | 26.13 | 7.96  | 28 | 0 | 18.94 | 0.054 |
| Q8ZK81 | 30S ribosomal protein S18                                   | 9065  | 11.11 | 127.27 | 4 | 4  | 46.67 | 7.95  | 25 | 0 | 19.95 | 0.054 |
| P67537 | UPF0250 protein ybeD                                        | 9793  | 5.04  | 71.82  | 4 | 4  | 91.95 | 8.16  | 21 | 0 | 26.95 | 0.057 |
| P0A7X0 | 30S ribosomal protein S8                                    | 14117 | 9.85  | 254.96 | 4 | 12 | 23.08 | 11.40 | 48 | 1 | 14.20 | 0.050 |
| P0A1P8 | Glutaredoxin 1                                              | 9917  | 5.54  | 121.76 | 3 | 10 | 40.23 | 7.48  | 21 | 0 | 19.04 | 0.051 |
| P0A6B1 | Acyl carrier protein                                        | 8634  | 3.75  | 102.33 | 3 | 4  | 41.03 | 7.10  | 17 | 0 | 19.32 | 0.038 |
| Q7CPP7 | 50S ribosomal protein L21                                   | 11571 | 10.29 | 99.17  | 3 | 7  | 40.78 | 9.65  | 18 | 1 | 21.25 | 0.046 |
| P67551 | UPF0253 protein yaeP                                        | 7151  | 4.37  | 86.73  | 3 | 5  | 57.58 | 3.83  | 15 | 0 | 23.56 | 0.057 |
| P0A7K0 | 50S ribosomal protein L11                                   | 14865 | 10.09 | 231.80 | 3 | 11 | 43.66 | 8.05  | 43 | 2 | 17.93 | 0.043 |
| Q7CR46 | Anti adapter protein iraP                                   | 9876  | 5.50  | 165.74 | 2 | 7  | 41.86 | 9.68  | 19 | 0 | 16.85 | 0.051 |
| P68684 | 30S ribosomal protein S21                                   | 8494  | 11.56 | 125.83 | 2 | 9  | 28.17 | 6.87  | 16 | 0 | 21.55 | 0.056 |
| P0A1R6 | DNA binding protein HU alpha                                | 9515  | 10.12 | 296.34 | 2 | 7  | 46.67 | 5.05  | 39 | 0 | 14.83 | 0.041 |

| Accession | Description                                                          | mW (Da) | pI (pH) | PLGS Score | Peptides | Theoretical Peptides | Coverage (%) | Precursor RMS Mass Error (ppm) | Products | Modified Peptides | Products RMS Mass Error (ppm) | Products RMS RT Error (min) |
|-----------|----------------------------------------------------------------------|---------|---------|------------|----------|----------------------|--------------|--------------------------------|----------|-------------------|-------------------------------|-----------------------------|
| P0A1D3    | 60 kDa chaperonin                                                    | 57249   | 4.65    | 1287.24    | 33       | 44                   | 69.71        | 7.89                           | 264      | 1                 | 18.07                         | 0.049                       |
| P14846    | Carbamoyl phosphate synthase large chain                             | 118064  | 4.94    | 382.18     | 23       | 83                   | 31.72        | 10.03                          | 120      | 2                 | 22.89                         | 0.063                       |
| P0A1H3    | Elongation factor G                                                  | 77550   | 5.00    | 477.00     | 22       | 47                   | 46.59        | 9.33                           | 121      | 1                 | 19.64                         | 0.054                       |
| P64076    | Enolase                                                              | 45570   | 5.08    | 1410.86    | 21       | 34                   | 75.23        | 6.69                           | 241      | 1                 | 17.42                         | 0.047                       |
| Q8ZMB5    | Protease 3                                                           | 107418  | 6.12    | 255.07     | 20       | 65                   | 32.74        | 8.86                           | 102      | 5                 | 24.16                         | 0.060                       |
| P65702    | Phosphoglycerate kinase                                              | 41106   | 4.90    | 1155.43    | 18       | 30                   | 63.31        | 8.32                           | 187      | 0                 | 17.52                         | 0.045                       |
| P0A1P0    | Glyceraldehyde 3 phosphate dehydrogenase                             | 35564   | 6.36    | 985.06     | 16       | 29                   | 62.84        | 10.27                          | 205      | 0                 | 17.24                         | 0.038                       |
| Q56073    | Chaperone protein dnaK                                               | 69215   | 4.64    | 598.02     | 16       | 59                   | 39.97        | 9.35                           | 109      | 2                 | 20.26                         | 0.050                       |
| P26978    | Bifunctional purine biosynthesis protein purH                        | 57431   | 5.48    | 229.44     | 16       | 50                   | 51.80        | 10.21                          | 95       | 3                 | 20.30                         | 0.052                       |
| P0A1H5    | Elongation factor Tu                                                 | 43256   | 5.15    | 1373.90    | 16       | 30                   | 65.23        | 7.91                           | 229      | 2                 | 17.44                         | 0.048                       |
| P0A1E3    | Cysteine synthase A                                                  | 34514   | 5.72    | 520.76     | 15       | 20                   | 42.72        | 5.95                           | 114      | 0                 | 17.17                         | 0.047                       |
| Q7CPE2    | ATP synthase subunit beta                                            | 50251   | 4.71    | 516.91     | 15       | 32                   | 49.35        | 8.40                           | 98       | 3                 | 18.21                         | 0.051                       |
| P06202    | Periplasmic oligopeptide binding protein                             | 61254   | 6.03    | 247.79     | 15       | 42                   | 48.43        | 7.62                           | 81       | 0                 | 23.41                         | 0.054                       |
| P0A1P6    | Glutamine synthetase                                                 | 51752   | 5.25    | 557.16     | 15       | 33                   | 51.81        | 8.00                           | 114      | 2                 | 22.96                         | 0.052                       |
| P0A2E1    | Serine hydroxymethyltransferase                                      | 45426   | 6.02    | 343.95     | 14       | 36                   | 43.65        | 8.67                           | 91       | 1                 | 16.69                         | 0.049                       |
| Q7CPE1    | ATP synthase subunit alpha                                           | 55078   | 5.61    | 298.14     | 14       | 40                   | 43.47        | 7.28                           | 75       | 0                 | 18.48                         | 0.052                       |
| P55900    | Phosphoserine aminotransferase                                       | 39806   | 5.17    | 268.79     | 14       | 28                   | 44.75        | 10.37                          | 69       | 0                 | 24.98                         | 0.061                       |
| O54297    | 30S ribosomal protein S4                                             | 23470   | 10.38   | 373.72     | 14       | 19                   | 48.06        | 9.84                           | 81       | 0                 | 19.62                         | 0.046                       |
| P00499    | ATP phosphoribosyltransferase                                        | 33190   | 5.31    | 504.13     | 13       | 24                   | 53.18        | 8.19                           | 96       | 0                 | 19.16                         | 0.052                       |
| P41031    | Thiosulfate binding protein                                          | 37559   | 9.19    | 426.88     | 13       | 32                   | 54.14        | 7.87                           | 78       | 0                 | 21.12                         | 0.049                       |
| P0A1A5    | Branched chain amino acid aminotransferase                           | 34031   | 5.47    | 320.18     | 13       | 26                   | 53.40        | 9.08                           | 84       | 2                 | 25.44                         | 0.054                       |
| P05989    | Ketol acid reductoisomerase                                          | 53907   | 4.96    | 289.85     | 13       | 47                   | 42.36        | 8.71                           | 81       | 2                 | 20.67                         | 0.054                       |
| Q8ZL56    | 2 3 bisposphoglycerate independent phosphoglycerate mutase           | 56219   | 4.88    | 257.53     | 13       | 37                   | 53.50        | 9.65                           | 76       | 2                 | 25.36                         | 0.055                       |
| P64052    | Elongation factor Ts                                                 | 30338   | 4.95    | 527.40     | 13       | 33                   | 62.90        | 9.11                           | 102      | 2                 | 18.40                         | 0.056                       |
| Q9L6N1    | 5 methyltetrahydropteroyltriglutamate homocysteine methyltransferase | 84615   | 5.67    | 318.47     | 12       | 60                   | 25.73        | 7.58                           | 53       | 1                 | 19.65                         | 0.059                       |
| P0A1V4    | Adenylate kinase                                                     | 23473   | 5.39    | 304.04     | 12       | 24                   | 50.47        | 8.13                           | 71       | 2                 | 19.34                         | 0.059                       |
| P14845    | Carbamoyl phosphate synthase small chain                             | 41625   | 6.00    | 286.01     | 12       | 27                   | 52.09        | 6.87                           | 73       | 1                 | 23.46                         | 0.054                       |
| P66932    | Trigger factor                                                       | 48036   | 4.64    | 280.24     | 12       | 43                   | 42.36        | 9.89                           | 63       | 2                 | 20.20                         | 0.053                       |
| P0A1F8    | Aspartate semialdehyde dehydrogenase                                 | 40110   | 5.21    | 277.50     | 12       | 27                   | 50.54        | 8.90                           | 70       | 1                 | 20.75                         | 0.058                       |
| P40732    | Acetylornithine succinyldiaminopimelate aminotransferase             | 43642   | 5.91    | 215.76     | 12       | 24                   | 50.12        | 7.25                           | 67       | 0                 | 21.80                         | 0.052                       |
| P00924    | Enolase 1                                                            | 46773   | 6.15    | 345.78     | 12       | 28                   | 43.25        | 10.97                          | 68       | 1                 | 25.41                         | 0.052                       |
| Q8ZP65    | Probable thiol peroxidase                                            | 18014   | 4.74    | 423.84     | 11       | 12                   | 95.83        | 8.96                           | 129      | 3                 | 18.66                         | 0.047                       |
| P10370    | Histidinol dehydrogenase                                             | 45860   | 4.83    | 299.04     | 11       | 26                   | 59.22        | 4.50                           | 80       | 0                 | 22.12                         | 0.051                       |
| P26976    | Non specific acid phosphatase                                        | 28364   | 9.22    | 255.84     | 11       | 19                   | 60.40        | 8.72                           | 67       | 1                 | 20.25                         | 0.047                       |
| P0A1R2    | Imidazole glycerol phosphate synthase subunit hisF                   | 28350   | 4.80    | 223.74     | 11       | 20                   | 56.98        | 10.04                          | 54       | 0                 | 23.39                         | 0.056                       |
| P26973    | DNA topoisomerase 4 subunit A                                        | 83984   | 6.10    | 218.44     | 11       | 52                   | 24.20        | 11.67                          | 55       | 2                 | 24.50                         | 0.055                       |
| P40861    | Gamma glutamyl phosphate reductase                                   | 44637   | 5.56    | 193.91     | 11       | 28                   | 39.42        | 12.75                          | 75       | 1                 | 27.42                         | 0.050                       |
| P0A2A3    | 50S ribosomal protein L1                                             | 24713   | 10.10   | 568.73     | 11       | 19                   | 57.69        | 6.19                           | 105      | 1                 | 17.27                         | 0.047                       |
| Q8ZK80    | 50S ribosomal protein L9                                             | 15774   | 7.73    | 493.77     | 10       | 14                   | 77.18        | 8.89                           | 78       | 0                 | 17.92                         | 0.047                       |
| Q7CQ05    | Autonomous glycyl radical cofactor                                   | 14335   | 4.92    | 438.91     | 10       | 15                   | 74.80        | 9.24                           | 128      | 0                 | 14.46                         | 0.036                       |
| P0A297    | 50S ribosomal protein L10                                            | 17789   | 9.46    | 333.57     | 10       | 15                   | 50.91        | 7.71                           | 75       | 2                 | 19.02                         | 0.052                       |
| P66541    | 30S ribosomal protein S2                                             | 26741   | 6.73    | 305.15     | 10       | 23                   | 48.96        | 9.47                           | 76       | 2                 | 19.38                         | 0.048                       |
| P66955    | Transaldolase B                                                      | 35149   | 4.91    | 204.81     | 10       | 26                   | 36.59        | 6.47                           | 42       | 0                 | 22.33                         | 0.056                       |
| P60446    | 50S ribosomal protein L3                                             | 22233   | 10.25   | 202.25     | 10       | 20                   | 46.89        | 10.65                          | 52       | 0                 | 16.38                         | 0.049                       |
| Q9ZF60    | Glutamate aspartate periplasmic binding protein                      | 33381   | 9.16    | 179.59     | 10       | 21                   | 42.38        | 10.06                          | 62       | 0                 | 24.67                         | 0.050                       |

|        |                                                                                               |       |       |        |    |    |       |       |     |   |       |       |
|--------|-----------------------------------------------------------------------------------------------|-------|-------|--------|----|----|-------|-------|-----|---|-------|-------|
| P26366 | N acetylmuramoyl L alanine amidase amiB                                                       | 46761 | 9.47  | 157.41 | 10 | 32 | 54.90 | 12.04 | 65  | 2 | 25.28 | 0.059 |
| P0A7W4 | 30S ribosomal protein S5                                                                      | 17592 | 10.56 | 935.44 | 10 | 13 | 73.65 | 8.74  | 128 | 1 | 17.61 | 0.045 |
| P0A2M5 | Uracil phosphoribosyltransferase                                                              | 22518 | 5.17  | 262.37 | 9  | 16 | 61.54 | 6.35  | 48  | 0 | 18.21 | 0.055 |
| P65215 | 2 dehydro 3 deoxyphosphooctonate aldolase                                                     | 30775 | 5.86  | 260.86 | 9  | 25 | 53.17 | 8.97  | 60  | 1 | 23.49 | 0.054 |
| Q8ZQK4 | Putative transport protein ybjL                                                               | 60141 | 8.35  | 244.68 | 9  | 32 | 23.53 | 7.43  | 40  | 1 | 25.06 | 0.059 |
| Q08016 | Ornithine carbamoyltransferase                                                                | 36717 | 5.25  | 239.16 | 9  | 26 | 30.24 | 10.35 | 50  | 1 | 20.21 | 0.052 |
| P26982 | Protease do                                                                                   | 49284 | 9.19  | 224.28 | 9  | 29 | 41.26 | 9.32  | 62  | 1 | 18.06 | 0.055 |
| P25924 | Siroheme synthase                                                                             | 50115 | 6.35  | 218.58 | 9  | 39 | 30.85 | 7.44  | 41  | 1 | 19.20 | 0.058 |
| P60726 | 50S ribosomal protein L4                                                                      | 22072 | 10.19 | 186.21 | 9  | 18 | 60.20 | 9.56  | 50  | 1 | 18.86 | 0.056 |
| P65889 | Phosphoribosylaminoimidazole succinocarboxamide synthase                                      | 26890 | 5.02  | 184.68 | 9  | 19 | 36.29 | 9.10  | 50  | 0 | 20.02 | 0.049 |
| P0A2B3 | 30S ribosomal protein S7                                                                      | 17579 | 10.73 | 175.14 | 9  | 10 | 68.59 | 11.52 | 44  | 0 | 18.47 | 0.050 |
| Q8ZNF3 | UDP 4 amino 4 deoxy L arabinose oxoglutarate aminotransferase                                 | 41138 | 5.83  | 168.74 | 9  | 22 | 35.36 | 11.32 | 44  | 0 | 25.35 | 0.061 |
| P0A2C5 | D ribose binding periplasmic protein                                                          | 30943 | 9.20  | 103.66 | 9  | 25 | 36.49 | 11.56 | 33  | 0 | 26.76 | 0.058 |
| P0A283 | Glucose specific phosphotransferase enzyme IIA component                                      | 18235 | 4.54  | 291.15 | 9  | 12 | 71.60 | 9.63  | 77  | 0 | 19.17 | 0.054 |
| Q8ZKP7 | Triosephosphate isomerase                                                                     | 26899 | 5.61  | 338.42 | 8  | 22 | 52.94 | 9.55  | 86  | 0 | 17.65 | 0.047 |
| P0A9Y9 | Cold shock like protein cspC                                                                  | 7397  | 7.70  | 287.33 | 8  | 5  | 86.96 | 8.19  | 51  | 0 | 15.11 | 0.048 |
| P0A2C7 | Spermidine putrescine binding periplasmic protein                                             | 38996 | 4.99  | 271.38 | 8  | 28 | 24.14 | 11.05 | 50  | 1 | 21.93 | 0.058 |
| P25077 | Malate dehydrogenase                                                                          | 32455 | 5.97  | 252.62 | 8  | 22 | 42.95 | 6.39  | 69  | 1 | 20.78 | 0.053 |
| P0A7Z7 | DNA directed RNA polymerase subunit alpha                                                     | 36489 | 4.78  | 199.29 | 8  | 28 | 20.06 | 9.08  | 35  | 0 | 19.63 | 0.051 |
| P14146 | Virulence transcriptional regulatory protein phoP                                             | 25617 | 5.14  | 187.75 | 8  | 21 | 54.91 | 9.59  | 50  | 1 | 23.43 | 0.051 |
| Q8ZRP4 | 2 3 4 5 tetrahydropyridine 2 6 dicarboxylate N succinyltransferase                            | 29833 | 5.39  | 186.64 | 8  | 25 | 36.13 | 11.21 | 55  | 1 | 26.04 | 0.055 |
| P10372 | 1 5 phosphoribosyl 5 5 phosphoribosylamino methylideneamino imidazole 4 carboxamide isomerase | 26072 | 5.50  | 162.57 | 8  | 19 | 53.88 | 7.65  | 35  | 0 | 21.88 | 0.056 |
| Q9L4T0 | S ribosylhomocysteine lyase                                                                   | 19295 | 5.68  | 125.56 | 8  | 15 | 70.18 | 12.10 | 49  | 1 | 23.14 | 0.061 |
| P0A1R4 | Imidazole glycerol phosphate synthase subunit hisH                                            | 21689 | 5.75  | 122.91 | 8  | 19 | 50.00 | 10.43 | 33  | 1 | 22.09 | 0.053 |
| P02910 | Histidine binding periplasmic protein                                                         | 28361 | 5.95  | 378.72 | 8  | 23 | 47.31 | 8.24  | 67  | 0 | 17.46 | 0.047 |
| P0A251 | Alkyl hydroperoxide reductase subunit C                                                       | 20734 | 4.85  | 438.21 | 7  | 16 | 58.29 | 8.19  | 57  | 1 | 17.23 | 0.053 |
| P66593 | 30S ribosomal protein S6                                                                      | 15163 | 5.08  | 288.27 | 7  | 9  | 62.60 | 7.47  | 67  | 2 | 14.26 | 0.059 |
| O54296 | 30S ribosomal protein S11                                                                     | 13822 | 11.74 | 277.03 | 7  | 9  | 52.71 | 7.22  | 47  | 1 | 16.65 | 0.056 |
| Q8ZQT5 | Protein tolB                                                                                  | 46120 | 8.73  | 220.97 | 7  | 21 | 27.44 | 7.15  | 48  | 0 | 17.68 | 0.044 |
| P02906 | Sulfate binding protein                                                                       | 36517 | 7.72  | 190.81 | 7  | 28 | 27.05 | 8.12  | 32  | 0 | 19.48 | 0.053 |
| Q8ZKW8 | ATP synthase gamma chain                                                                      | 31535 | 9.26  | 159.25 | 7  | 26 | 45.64 | 12.00 | 45  | 2 | 26.13 | 0.063 |
| P66032 | 3 4 dihydroxy 2 butanone 4 phosphate synthase                                                 | 23295 | 4.70  | 158.01 | 7  | 15 | 53.00 | 12.73 | 35  | 1 | 24.05 | 0.061 |
| P0AA02 | Transcription antitermination protein nusG                                                    | 20532 | 6.40  | 147.69 | 7  | 13 | 61.33 | 5.64  | 46  | 1 | 23.54 | 0.067 |
| Q8ZRP3 | 1 deoxy D xylulose 5 phosphate reductoisomerase                                               | 43324 | 5.85  | 132.86 | 7  | 28 | 24.87 | 13.54 | 36  | 1 | 21.19 | 0.059 |
| P0A1V6 | Ribose phosphate pyrophosphokinase                                                            | 34194 | 5.06  | 121.99 | 7  | 19 | 26.98 | 7.53  | 24  | 0 | 21.42 | 0.050 |
| P10367 | Histidine biosynthesis bifunctional protein hisIE                                             | 22660 | 5.37  | 115.94 | 7  | 15 | 39.90 | 5.38  | 36  | 1 | 21.39 | 0.053 |
| Q8ZRT5 | GMP reductase                                                                                 | 37114 | 6.09  | 114.64 | 7  | 20 | 24.21 | 5.81  | 22  | 0 | 17.19 | 0.064 |
| P62405 | 50S ribosomal protein L5                                                                      | 20304 | 9.76  | 102.01 | 7  | 14 | 42.46 | 7.31  | 34  | 0 | 17.88 | 0.056 |
| P0A1S2 | DNA binding protein H NS                                                                      | 15532 | 5.09  | 510.41 | 7  | 14 | 60.58 | 5.51  | 110 | 3 | 17.15 | 0.048 |
| P0AA28 | Thioredoxin 1                                                                                 | 11799 | 4.47  | 476.89 | 6  | 8  | 49.54 | 8.02  | 84  | 0 | 14.68 | 0.041 |
| P66313 | 50S ribosomal protein L6                                                                      | 18848 | 10.09 | 333.12 | 6  | 13 | 52.54 | 9.53  | 56  | 0 | 16.89 | 0.038 |
| P0A7X0 | 30S ribosomal protein S8                                                                      | 14117 | 9.85  | 323.84 | 6  | 12 | 52.31 | 8.30  | 65  | 1 | 17.19 | 0.055 |
| P0A1Z2 | Chaperone protein skp                                                                         | 17894 | 10.25 | 289.75 | 6  | 10 | 56.52 | 8.23  | 62  | 1 | 18.82 | 0.057 |
| Q7CPL5 | 50S ribosomal protein L14                                                                     | 13559 | 10.89 | 227.74 | 6  | 14 | 47.97 | 9.70  | 57  | 2 | 19.72 | 0.054 |
| P69936 | NADP dependent L serine L allo threonine dehydrogenase ydfG                                   | 27025 | 5.78  | 218.02 | 6  | 19 | 42.34 | 11.58 | 32  | 0 | 25.63 | 0.056 |
| Q8ZQS2 | 2 3 bisphosphoglycerate dependent phosphoglycerate mutase                                     | 28475 | 5.71  | 211.22 | 6  | 19 | 26.40 | 6.50  | 28  | 0 | 19.81 | 0.052 |



|        |                                           |       |       |        |   |    |       |       |    |   |       |       |
|--------|-------------------------------------------|-------|-------|--------|---|----|-------|-------|----|---|-------|-------|
| Q8ZPD6 | Uncharacterized protein yncE              | 38480 | 9.55  | 192.41 | 6 | 27 | 25.78 | 7.61  | 37 | 0 | 17.94 | 0.055 |
| Q7CPL6 | 50S ribosomal protein L18                 | 12761 | 10.88 | 161.86 | 6 | 9  | 49.57 | 10.81 | 32 | 0 | 18.74 | 0.052 |
| P66692 | Ribose 5 phosphate isomerase A            | 22881 | 4.89  | 139.51 | 6 | 15 | 38.36 | 4.22  | 38 | 0 | 21.03 | 0.055 |
| P0A7V6 | 30S ribosomal protein S3                  | 25967 | 10.72 | 135.26 | 6 | 20 | 45.92 | 8.46  | 34 | 0 | 18.83 | 0.055 |
| P66193 | 50S ribosomal protein L31 type B          | 9808  | 9.67  | 120.13 | 6 | 9  | 69.77 | 12.41 | 36 | 0 | 16.33 | 0.046 |
| P0A1D5 | 10 kDa chaperonin                         | 10311 | 5.19  | 510.96 | 6 | 7  | 74.23 | 6.84  | 80 | 1 | 14.59 | 0.042 |
| P0A299 | 50S ribosomal protein L7 L12              | 12291 | 4.40  | 318.82 | 5 | 20 | 67.77 | 3.61  | 54 | 2 | 16.06 | 0.056 |
| P63411 | Acetate kinase                            | 43230 | 5.91  | 263.83 | 5 | 25 | 27.50 | 4.40  | 36 | 2 | 19.65 | 0.043 |
| P67904 | 30S ribosomal protein S10                 | 11759 | 10.33 | 256.97 | 5 | 11 | 35.92 | 8.79  | 42 | 0 | 19.12 | 0.050 |
| P21267 | Glutamate 1 semialdehyde 2 1 aminomutase  | 45295 | 4.62  | 199.65 | 5 | 24 | 23.24 | 9.01  | 38 | 2 | 21.18 | 0.056 |
| Q7CR64 | UPF0325 protein yaeH                      | 15084 | 7.17  | 188.34 | 5 | 11 | 35.16 | 9.68  | 30 | 0 | 15.75 | 0.058 |
| P67179 | UPF0082 protein yebC                      | 26401 | 4.53  | 165.89 | 5 | 16 | 27.24 | 4.36  | 25 | 0 | 17.29 | 0.049 |
| P0A2A1 | 50S ribosomal protein L19                 | 13122 | 11.24 | 145.08 | 5 | 11 | 45.22 | 11.89 | 30 | 0 | 23.59 | 0.055 |
| P0A1W6 | Leucine specific binding protein          | 39375 | 5.84  | 129.53 | 5 | 27 | 31.17 | 9.11  | 30 | 1 | 26.55 | 0.060 |
| Q9L9I8 | Thiamine phosphate pyrophosphorylase      | 22969 | 4.95  | 118.47 | 5 | 16 | 41.23 | 6.38  | 23 | 0 | 21.49 | 0.047 |
| Q7CPH8 | Protein export protein secB               | 17234 | 4.06  | 105.75 | 5 | 12 | 52.26 | 8.66  | 19 | 0 | 20.80 | 0.070 |
| Q8ZNK6 | Probable endonuclease 4                   | 31176 | 5.02  | 76.21  | 5 | 17 | 24.56 | 10.03 | 24 | 0 | 20.32 | 0.061 |
| P66038 | 6 7 dimethyl 8 ribityllumazine synthase   | 15998 | 4.91  | 389.26 | 5 | 8  | 51.28 | 10.31 | 60 | 0 | 17.48 | 0.041 |
| P0A1R6 | DNA binding protein HU alpha              | 9515  | 10.12 | 240.97 | 4 | 7  | 57.78 | 12.51 | 39 | 0 | 16.92 | 0.046 |
| Q8ZLM1 | 30S ribosomal protein S13                 | 13153 | 11.22 | 215.90 | 4 | 12 | 34.75 | 7.48  | 30 | 0 | 17.45 | 0.051 |
| P37168 | Virulence factor mvIM                     | 33987 | 6.88  | 177.84 | 4 | 27 | 22.15 | 4.93  | 17 | 0 | 23.81 | 0.052 |
| P0A2F6 | Single stranded DNA binding protein       | 19062 | 5.29  | 173.35 | 4 | 11 | 36.93 | 6.06  | 33 | 0 | 15.94 | 0.051 |
| P0A7K0 | 50S ribosomal protein L11                 | 14865 | 10.09 | 172.82 | 4 | 11 | 23.24 | 6.75  | 34 | 0 | 13.72 | 0.052 |
| P02936 | Outer membrane protein A                  | 37491 | 5.50  | 172.67 | 4 | 25 | 20.86 | 8.70  | 29 | 0 | 20.97 | 0.054 |
| P66643 | 30S ribosomal protein S9                  | 14817 | 11.34 | 155.13 | 4 | 14 | 33.85 | 8.52  | 26 | 0 | 13.21 | 0.050 |
| P68684 | 30S ribosomal protein S21                 | 8494  | 11.56 | 146.61 | 4 | 9  | 42.25 | 9.17  | 22 | 0 | 19.26 | 0.056 |
| Q7CPL7 | 50S ribosomal protein L17                 | 14385 | 11.46 | 139.94 | 4 | 8  | 26.77 | 5.96  | 26 | 0 | 15.34 | 0.058 |
| P67093 | Universal stress protein G                | 15891 | 6.20  | 135.27 | 4 | 9  | 47.89 | 11.92 | 25 | 1 | 23.07 | 0.055 |
| Q8ZK81 | 30S ribosomal protein S18                 | 9065  | 11.11 | 128.19 | 4 | 4  | 42.67 | 13.02 | 22 | 0 | 23.17 | 0.061 |
| P0A1S4 | DNA binding protein stpA                  | 15477 | 9.24  | 126.75 | 4 | 12 | 42.11 | 5.83  | 35 | 2 | 21.58 | 0.055 |
| P0A7S6 | 30S ribosomal protein S12                 | 13728 | 11.28 | 96.44  | 4 | 15 | 22.58 | 8.84  | 19 | 0 | 20.83 | 0.046 |
| Q8ZRM7 | 2 5 diketo D gluconic acid reductase B    | 29135 | 5.17  | 92.94  | 4 | 24 | 41.57 | 8.04  | 24 | 2 | 27.79 | 0.056 |
| Q7CPP7 | 50S ribosomal protein L21                 | 11571 | 10.29 | 79.82  | 4 | 7  | 40.78 | 6.26  | 18 | 0 | 18.09 | 0.048 |
| Q7CPZ4 | Protein grpE                              | 21827 | 4.49  | 72.19  | 4 | 18 | 36.22 | 12.32 | 17 | 0 | 22.91 | 0.059 |
| P0A2H9 | Thiol disulfide interchange protein dsbA  | 22896 | 5.55  | 245.67 | 4 | 14 | 39.61 | 6.88  | 55 | 2 | 20.99 | 0.048 |
| P53636 | Superoxide dismutase Cu Zn 1              | 18358 | 6.55  | 167.53 | 3 | 10 | 23.16 | 10.81 | 24 | 0 | 17.95 | 0.053 |
| Q7CR46 | Anti adapter protein iraP                 | 9876  | 5.50  | 157.93 | 3 | 7  | 73.26 | 6.64  | 23 | 0 | 15.28 | 0.045 |
| P67617 | Probable Fe 2 trafficking protein         | 10892 | 5.87  | 118.47 | 3 | 15 | 72.53 | 8.39  | 30 | 2 | 20.94 | 0.058 |
| P66431 | 30S ribosomal protein S15                 | 10191 | 10.82 | 96.70  | 3 | 8  | 22.47 | 6.81  | 15 | 0 | 15.66 | 0.055 |
| P67537 | UPF0250 protein ybeD                      | 9793  | 5.04  | 50.20  | 3 | 4  | 74.71 | 3.30  | 16 | 0 | 27.07 | 0.052 |
| P16657 | Enoyl acyl carrier protein reductase NADH | 27742 | 5.47  | 167.72 | 3 | 21 | 17.56 | 10.15 | 16 | 1 | 21.40 | 0.041 |
| P0A2A7 | 50S ribosomal protein L30                 | 6509  | 11.41 | 75.14  | 2 | 6  | 33.90 | 7.82  | 16 | 0 | 19.08 | 0.048 |
| P0A2B1 | 30S ribosomal protein S20                 | 9649  | 11.63 | 148.08 | 2 | 3  | 22.99 | 7.66  | 22 | 0 | 15.31 | 0.046 |

| SA123 + Zn(II) LC-MS run 1: 123_Zn_220709_1a2_01 |             |         |         |            |          |                      |              |                                |          |                   |                               |                             |
|--------------------------------------------------|-------------|---------|---------|------------|----------|----------------------|--------------|--------------------------------|----------|-------------------|-------------------------------|-----------------------------|
| Accession                                        | Description | mW (Da) | pI (pH) | PLGS Score | Peptides | Theoretical Peptides | Coverage (%) | Precursor RMS Mass Error (ppm) | Products | Modified Peptides | Products RMS Mass Error (ppm) | Products RMS RT Error (min) |

|        |                                                                      |       |       |         |    |    |       |       |     |   |       |       |
|--------|----------------------------------------------------------------------|-------|-------|---------|----|----|-------|-------|-----|---|-------|-------|
| P0A1H3 | Elongation factor G                                                  | 77550 | 5.00  | 707.19  | 42 | 47 | 79.83 | 10.24 | 262 | 5 | 23.27 | 0.043 |
| P0A1D3 | 60 kDa chaperonin                                                    | 57249 | 4.65  | 1205.81 | 42 | 44 | 85.04 | 9.40  | 351 | 6 | 20.15 | 0.040 |
| Q8ZQZ6 | Leucyl tRNA synthetase                                               | 96923 | 5.02  | 653.96  | 38 | 66 | 54.07 | 9.81  | 242 | 7 | 24.85 | 0.044 |
| Q8ZP54 | Exoribonuclease 2                                                    | 72394 | 5.40  | 608.29  | 32 | 50 | 49.22 | 10.89 | 184 | 4 | 22.14 | 0.042 |
| P06202 | Periplasmic oligopeptide binding protein                             | 61254 | 6.03  | 553.09  | 29 | 42 | 60.59 | 8.91  | 171 | 0 | 22.56 | 0.045 |
| Q56073 | Chaperone protein dnaK                                               | 69215 | 4.64  | 668.70  | 29 | 59 | 56.11 | 9.29  | 195 | 5 | 21.92 | 0.043 |
| P0A1P6 | Glutamine synthetase                                                 | 51752 | 5.25  | 521.08  | 28 | 33 | 75.91 | 9.39  | 171 | 3 | 23.92 | 0.042 |
| P64076 | Enolase                                                              | 45570 | 5.08  | 1116.74 | 27 | 34 | 83.33 | 8.10  | 260 | 0 | 19.93 | 0.041 |
| Q7CPE2 | ATP synthase subunit beta                                            | 50251 | 4.71  | 617.96  | 26 | 32 | 66.09 | 10.35 | 162 | 3 | 22.09 | 0.045 |
| P52616 | Phase 2 flagellin                                                    | 52504 | 4.55  | 801.50  | 25 | 37 | 68.58 | 10.03 | 183 | 1 | 22.84 | 0.042 |
| Q9L6N1 | 5 methyltetrahydropteroyltriglutamate homocysteine methyltransferase | 84615 | 5.67  | 566.79  | 25 | 60 | 38.46 | 9.11  | 156 | 5 | 22.74 | 0.044 |
| P0A1H5 | Elongation factor Tu                                                 | 43256 | 5.15  | 1224.33 | 25 | 30 | 81.47 | 10.26 | 307 | 3 | 17.67 | 0.037 |
| P65702 | Phosphoglycerate kinase                                              | 41106 | 4.90  | 1147.75 | 24 | 30 | 77.78 | 8.72  | 222 | 1 | 20.23 | 0.036 |
| P23905 | D galactose binding periplasmic protein                              | 35791 | 5.75  | 361.32  | 23 | 30 | 77.11 | 9.20  | 149 | 3 | 24.90 | 0.037 |
| P41031 | Thiosulfate binding protein                                          | 37559 | 9.19  | 747.19  | 23 | 32 | 77.81 | 9.52  | 198 | 1 | 19.14 | 0.043 |
| P64052 | Elongation factor Ts                                                 | 30338 | 4.95  | 517.34  | 22 | 33 | 76.68 | 10.09 | 155 | 2 | 21.64 | 0.046 |
| P05989 | Ketol acid reductoisomerase                                          | 53907 | 4.96  | 525.92  | 21 | 47 | 53.56 | 8.99  | 133 | 4 | 20.95 | 0.043 |
| P0A1P0 | Glyceraldehyde 3 phosphate dehydrogenase                             | 35564 | 6.36  | 949.83  | 21 | 29 | 64.65 | 7.99  | 258 | 3 | 18.91 | 0.037 |
| P26982 | Protease do                                                          | 49284 | 9.19  | 377.87  | 20 | 29 | 66.32 | 9.96  | 153 | 5 | 22.03 | 0.044 |
| O33921 | Glucose 1 phosphatase                                                | 45530 | 6.64  | 343.22  | 20 | 25 | 65.62 | 9.70  | 138 | 1 | 21.64 | 0.041 |
| P06179 | Flagellin                                                            | 51581 | 4.60  | 650.58  | 20 | 36 | 49.90 | 9.78  | 181 | 3 | 22.90 | 0.042 |
| Q7CQ05 | Autonomous glycyl radical cofactor                                   | 14335 | 4.92  | 447.69  | 19 | 15 | 91.34 | 9.41  | 155 | 1 | 18.18 | 0.040 |
| P02936 | Outer membrane protein A                                             | 37491 | 5.50  | 365.99  | 19 | 25 | 56.86 | 11.30 | 137 | 1 | 26.67 | 0.041 |
| Q8ZRC0 | ATP dependent Clp protease ATP binding subunit clpX                  | 46147 | 5.05  | 350.40  | 19 | 38 | 68.56 | 10.19 | 116 | 1 | 22.95 | 0.043 |
| P66955 | Transaldolase B                                                      | 35149 | 4.91  | 456.49  | 19 | 26 | 62.78 | 9.66  | 104 | 1 | 22.28 | 0.038 |
| Q7CR87 | Chaperone surA                                                       | 47221 | 6.88  | 394.92  | 18 | 31 | 61.45 | 7.81  | 129 | 1 | 22.38 | 0.036 |
| P65215 | 2 dehydro 3 deoxyphosphooctonate aldolase                            | 30775 | 5.86  | 347.24  | 18 | 25 | 67.96 | 9.18  | 105 | 3 | 22.31 | 0.044 |
| P60446 | 50S ribosomal protein L3                                             | 22233 | 10.25 | 314.24  | 18 | 20 | 77.99 | 11.34 | 120 | 0 | 23.36 | 0.037 |
| P0A1E3 | Cysteine synthase A                                                  | 34514 | 5.72  | 723.81  | 18 | 20 | 57.89 | 6.46  | 162 | 4 | 20.00 | 0.043 |
| P0A297 | 50S ribosomal protein L10                                            | 17789 | 9.46  | 484.45  | 17 | 15 | 67.88 | 7.64  | 123 | 3 | 20.88 | 0.041 |
| Q9ZF60 | Glutamate aspartate periplasmic binding protein                      | 33381 | 9.16  | 501.67  | 17 | 21 | 66.89 | 6.41  | 114 | 1 | 22.36 | 0.039 |
| P02910 | Histidine binding periplasmic protein                                | 28361 | 5.95  | 564.11  | 16 | 23 | 71.54 | 9.30  | 132 | 1 | 21.16 | 0.041 |
| P17215 | Leu Ile Val Thr binding protein                                      | 38762 | 5.69  | 500.96  | 16 | 21 | 74.79 | 6.85  | 131 | 1 | 19.76 | 0.040 |
| P66541 | 30S ribosomal protein S2                                             | 26741 | 6.73  | 408.33  | 16 | 23 | 70.12 | 9.31  | 123 | 2 | 20.74 | 0.043 |
| Q8ZQT5 | Protein tolB                                                         | 46120 | 8.73  | 386.11  | 16 | 21 | 51.16 | 9.03  | 99  | 1 | 20.69 | 0.040 |
| P0A7Z7 | DNA directed RNA polymerase subunit alpha                            | 36489 | 4.78  | 358.23  | 16 | 28 | 53.19 | 10.40 | 116 | 2 | 19.90 | 0.040 |
| P02911 | Lysine arginine ornithine binding periplasmic protein                | 28182 | 5.90  | 281.31  | 16 | 23 | 51.54 | 10.08 | 87  | 1 | 22.77 | 0.044 |
| P25077 | Malate dehydrogenase                                                 | 32455 | 5.97  | 716.02  | 16 | 22 | 72.44 | 7.61  | 157 | 2 | 17.53 | 0.039 |
| P02906 | Sulfate binding protein                                              | 36517 | 7.72  | 432.53  | 15 | 28 | 55.93 | 9.63  | 99  | 0 | 20.65 | 0.046 |
| Q8ZKP7 | Triosephosphate isomerase                                            | 26899 | 5.61  | 340.56  | 15 | 22 | 57.65 | 7.91  | 120 | 0 | 18.60 | 0.035 |
| P67179 | UPF0082 protein yebC                                                 | 26401 | 4.53  | 304.77  | 15 | 16 | 57.72 | 9.98  | 109 | 2 | 22.43 | 0.040 |
| Q8ZLR8 | UPF0042 protein yhbJ                                                 | 32443 | 8.19  | 254.67  | 15 | 20 | 48.59 | 8.55  | 83  | 2 | 25.27 | 0.044 |
| P0A7W4 | 30S ribosomal protein S5                                             | 17592 | 10.56 | 567.92  | 15 | 13 | 76.65 | 9.42  | 121 | 2 | 17.86 | 0.040 |
| P0A2C5 | D ribose binding periplasmic protein                                 | 30943 | 9.20  | 289.71  | 14 | 25 | 57.77 | 9.50  | 73  | 0 | 20.05 | 0.045 |
| P29768 | Sialidase                                                            | 42046 | 8.46  | 325.81  | 13 | 27 | 48.43 | 10.54 | 101 | 4 | 23.69 | 0.042 |
| P0A1S2 | DNA binding protein H NS                                             | 15532 | 5.09  | 515.64  | 13 | 14 | 82.48 | 9.01  | 125 | 2 | 16.90 | 0.040 |
| P0A2A3 | 50S ribosomal protein L1                                             | 24713 | 10.10 | 333.59  | 12 | 19 | 53.85 | 7.99  | 65  | 1 | 21.64 | 0.047 |

|        |                                                                    |       |       |        |    |    |       |       |     |   |       |       |
|--------|--------------------------------------------------------------------|-------|-------|--------|----|----|-------|-------|-----|---|-------|-------|
| P00929 | Tryptophan synthase alpha chain                                    | 28652 | 5.29  | 314.53 | 12 | 19 | 71.27 | 8.69  | 81  | 1 | 22.20 | 0.044 |
| P0A1V4 | Adenylate kinase                                                   | 23473 | 5.39  | 360.26 | 12 | 24 | 49.53 | 10.52 | 78  | 0 | 19.35 | 0.041 |
| P66313 | 50S ribosomal protein L6                                           | 18848 | 10.09 | 373.03 | 11 | 13 | 61.58 | 7.88  | 91  | 1 | 19.38 | 0.041 |
| P0A251 | Alkyl hydroperoxide reductase subunit C                            | 20734 | 4.85  | 325.51 | 11 | 16 | 86.63 | 9.45  | 85  | 1 | 21.63 | 0.042 |
| P0A1Z2 | Chaperone protein skp                                              | 17894 | 10.25 | 284.99 | 11 | 10 | 73.29 | 9.94  | 106 | 2 | 20.93 | 0.038 |
| P0A299 | 50S ribosomal protein L7 L12                                       | 12291 | 4.40  | 472.49 | 11 | 20 | 80.99 | 7.20  | 117 | 4 | 18.27 | 0.039 |
| P0A1R2 | Imidazole glycerol phosphate synthase subunit hisF                 | 28350 | 4.80  | 208.69 | 10 | 20 | 63.95 | 11.64 | 49  | 0 | 24.71 | 0.047 |
| P0A8B8 | UPF0133 protein ybaB                                               | 12006 | 4.82  | 183.11 | 10 | 11 | 89.91 | 8.70  | 73  | 3 | 22.06 | 0.046 |
| Q7CPD8 | UPF0438 protein yifE                                               | 13069 | 6.23  | 156.81 | 10 | 13 | 66.96 | 8.74  | 69  | 0 | 24.45 | 0.037 |
| Q8ZK80 | 50S ribosomal protein L9                                           | 15774 | 7.73  | 360.36 | 10 | 14 | 59.73 | 9.48  | 89  | 2 | 22.03 | 0.042 |
| P69936 | NADP dependent L serine L allo threonine dehydrogenase ydfG        | 27025 | 5.78  | 280.87 | 9  | 19 | 76.21 | 10.87 | 91  | 6 | 19.16 | 0.046 |
| P0A1S0 | Integration host factor subunit alpha                              | 11360 | 9.88  | 271.35 | 9  | 13 | 58.59 | 7.46  | 60  | 0 | 21.64 | 0.039 |
| P0A7K0 | 50S ribosomal protein L11                                          | 14865 | 10.09 | 221.69 | 9  | 11 | 53.52 | 8.41  | 75  | 1 | 17.57 | 0.034 |
| P67093 | Universal stress protein G                                         | 15891 | 6.20  | 201.14 | 9  | 9  | 91.55 | 8.49  | 51  | 2 | 19.31 | 0.040 |
| P66593 | 30S ribosomal protein S6                                           | 15163 | 5.08  | 196.97 | 9  | 9  | 70.23 | 8.40  | 65  | 2 | 19.44 | 0.041 |
| P22107 | TraT complement resistance protein                                 | 26261 | 9.35  | 391.56 | 9  | 18 | 42.39 | 9.28  | 77  | 2 | 22.39 | 0.038 |
| O54297 | 30S ribosomal protein S4                                           | 23470 | 10.38 | 352.92 | 8  | 19 | 38.35 | 6.92  | 58  | 0 | 18.56 | 0.047 |
| Q8ZRP4 | 2 3 4 5 tetrahydropyridine 2 6 dicarboxylate N succinyltransferase | 29833 | 5.39  | 264.86 | 8  | 25 | 38.69 | 11.28 | 65  | 1 | 20.39 | 0.041 |
| P0A2A9 | 30S ribosomal protein S16                                          | 9229  | 11.05 | 261.35 | 8  | 6  | 73.17 | 8.33  | 53  | 0 | 19.98 | 0.037 |
| P66193 | 50S ribosomal protein L31 type B                                   | 9808  | 9.67  | 204.94 | 8  | 9  | 70.93 | 10.27 | 51  | 0 | 22.73 | 0.038 |
| P0A2F6 | Single stranded DNA binding protein                                | 19062 | 5.29  | 178.60 | 8  | 11 | 56.82 | 8.09  | 59  | 1 | 18.55 | 0.044 |
| Q8ZP65 | Probable thiol peroxidase                                          | 18014 | 4.74  | 452.92 | 8  | 12 | 95.83 | 7.27  | 106 | 2 | 16.88 | 0.032 |
| P53636 | Superoxide dismutase Cu Zn 1                                       | 18358 | 6.55  | 260.31 | 7  | 10 | 49.72 | 10.44 | 60  | 2 | 18.60 | 0.042 |
| P0AA28 | Thioredoxin 1                                                      | 11799 | 4.47  | 417.09 | 6  | 8  | 53.21 | 8.59  | 97  | 2 | 20.31 | 0.034 |
| P0A283 | Glucose specific phosphotransferase enzyme IIA component           | 18235 | 4.54  | 377.61 | 6  | 12 | 36.69 | 7.37  | 83  | 2 | 19.01 | 0.033 |
| P0A9Y9 | Cold shock like protein cspC                                       | 7397  | 7.70  | 290.49 | 6  | 5  | 92.75 | 10.78 | 58  | 0 | 18.36 | 0.038 |
| P0AA07 | Phosphocarrier protein HPr                                         | 9113  | 5.51  | 153.10 | 6  | 7  | 95.29 | 9.51  | 69  | 1 | 18.70 | 0.037 |
| P0A1D5 | 10 kDa chaperonin                                                  | 10311 | 5.19  | 458.51 | 6  | 7  | 79.38 | 5.74  | 92  | 0 | 16.47 | 0.036 |
| P0A2M5 | Uracil phosphoribosyltransferase                                   | 22518 | 5.17  | 242.85 | 5  | 16 | 36.54 | 9.90  | 37  | 1 | 21.09 | 0.041 |
| P0A7X0 | 30S ribosomal protein S8                                           | 14117 | 9.85  | 210.20 | 5  | 12 | 32.31 | 8.08  | 40  | 0 | 17.16 | 0.037 |
| P66038 | 6 7 dimethyl 8 ribityllumazine synthase                            | 15998 | 4.91  | 181.14 | 5  | 8  | 47.44 | 9.63  | 42  | 1 | 16.25 | 0.043 |
| Q8ZRE7 | UPF0345 protein yaiE                                               | 10151 | 4.82  | 107.57 | 5  | 6  | 67.02 | 7.59  | 29  | 0 | 25.52 | 0.042 |
| P0A2H9 | Thiol disulfide interchange protein dsbA                           | 22896 | 5.55  | 315.91 | 5  | 14 | 39.61 | 5.41  | 77  | 2 | 20.41 | 0.037 |
| P26983 | Probable sigma 54 modulation protein                               | 10850 | 6.72  | 121.29 | 4  | 7  | 74.74 | 8.63  | 32  | 0 | 20.30 | 0.038 |
| P66170 | 50S ribosomal protein L29                                          | 7255  | 10.52 | 93.91  | 4  | 4  | 41.27 | 8.55  | 20  | 0 | 16.53 | 0.045 |
| P0A2A7 | 50S ribosomal protein L30                                          | 6509  | 11.41 | 194.44 | 4  | 6  | 50.85 | 7.66  | 33  | 0 | 19.04 | 0.038 |
| P69226 | Translation initiation factor IF 1                                 | 8244  | 9.74  | 80.22  | 3  | 5  | 52.78 | 7.65  | 16  | 0 | 25.74 | 0.050 |
| P0A1P8 | Glutaredoxin 1                                                     | 9917  | 5.54  | 113.71 | 3  | 10 | 45.98 | 10.92 | 23  | 0 | 22.13 | 0.045 |

| SA123 + Zn(II) LC-MS run 2: 123_Zn_220709_1a2_02 |                                          |         |         |            |          |                      |              |                                |          |                   |                               |                             |
|--------------------------------------------------|------------------------------------------|---------|---------|------------|----------|----------------------|--------------|--------------------------------|----------|-------------------|-------------------------------|-----------------------------|
| Accession                                        | Description                              | mW (Da) | pI (pH) | PLGS Score | Peptides | Theoretical Peptides | Coverage (%) | Precursor RMS Mass Error (ppm) | Products | Modified Peptides | Products RMS Mass Error (ppm) | Products RMS RT Error (min) |
| P0A1D3                                           | 60 kDa chaperonin                        | 57249   | 4.65    | 1259.88    | 31       | 44                   | 76.28        | 6.88                           | 257      | 0                 | 16.55                         | 0.052                       |
| P06202                                           | Periplasmic oligopeptide binding protein | 61254   | 6.03    | 558.16     | 23       | 42                   | 53.41        | 7.67                           | 148      | 1                 | 20.89                         | 0.059                       |
| P0A1H3                                           | Elongation factor G                      | 77550   | 5.00    | 449.13     | 22       | 47                   | 55.11        | 10.50                          | 124      | 2                 | 20.87                         | 0.055                       |
| P64076                                           | Enolase                                  | 45570   | 5.08    | 1277.59    | 21       | 34                   | 60.88        | 7.64                           | 224      | 2                 | 17.77                         | 0.050                       |

|        |                                                                      |       |       |         |    |    |       |       |     |   |       |       |
|--------|----------------------------------------------------------------------|-------|-------|---------|----|----|-------|-------|-----|---|-------|-------|
| P0A1H5 | Elongation factor Tu                                                 | 43256 | 5.15  | 1529.91 | 21 | 30 | 71.32 | 9.05  | 289 | 2 | 16.34 | 0.048 |
| P52616 | Phase 2 flagellin                                                    | 52504 | 4.55  | 433.97  | 20 | 37 | 59.68 | 8.86  | 120 | 2 | 19.90 | 0.062 |
| P65702 | Phosphoglycerate kinase                                              | 41106 | 4.90  | 1215.59 | 20 | 30 | 66.15 | 6.37  | 196 | 0 | 17.22 | 0.046 |
| Q56073 | Chaperone protein dnaK                                               | 69215 | 4.64  | 681.08  | 19 | 59 | 43.42 | 8.56  | 108 | 1 | 19.22 | 0.059 |
| P00924 | Enolase 1                                                            | 46773 | 6.15  | 520.64  | 18 | 28 | 48.05 | 9.92  | 113 | 4 | 22.15 | 0.056 |
| Q7CPE2 | ATP synthase subunit beta                                            | 50251 | 4.71  | 618.02  | 17 | 32 | 55.87 | 7.38  | 109 | 2 | 19.58 | 0.060 |
| P64052 | Elongation factor Ts                                                 | 30338 | 4.95  | 553.40  | 17 | 33 | 68.90 | 8.86  | 118 | 3 | 18.73 | 0.058 |
| P0A1E3 | Cysteine synthase A                                                  | 34514 | 5.72  | 502.48  | 17 | 20 | 60.37 | 6.84  | 107 | 0 | 16.90 | 0.053 |
| P06179 | Flagellin                                                            | 51581 | 4.60  | 412.43  | 17 | 36 | 49.29 | 7.29  | 97  | 1 | 20.84 | 0.059 |
| Q9L6N1 | 5 methyltetrahydropteroyltriglutamate homocysteine methyltransferase | 84615 | 5.67  | 363.94  | 17 | 60 | 29.44 | 9.43  | 89  | 1 | 20.97 | 0.057 |
| P41031 | Thiosulfate binding protein                                          | 37559 | 9.19  | 619.23  | 17 | 32 | 61.24 | 6.56  | 121 | 0 | 18.74 | 0.055 |
| P0A2E1 | Serine hydroxymethyltransferase                                      | 45426 | 6.02  | 466.68  | 16 | 36 | 45.08 | 6.88  | 106 | 1 | 19.59 | 0.060 |
| Q7CPE1 | ATP synthase subunit alpha                                           | 55078 | 5.61  | 374.92  | 16 | 40 | 53.02 | 8.56  | 105 | 3 | 25.03 | 0.054 |
| Q7CR87 | Chaperone surA                                                       | 47221 | 6.88  | 357.39  | 16 | 31 | 55.84 | 8.52  | 100 | 1 | 19.94 | 0.060 |
| Q8ZQT5 | Protein tolB                                                         | 46120 | 8.73  | 308.16  | 16 | 21 | 55.35 | 7.53  | 90  | 1 | 20.01 | 0.058 |
| O33921 | Glucose 1 phosphatase                                                | 45530 | 6.64  | 276.99  | 16 | 25 | 57.39 | 10.16 | 90  | 0 | 23.38 | 0.062 |
| P05989 | Ketol acid reductoisomerase                                          | 53907 | 4.96  | 270.89  | 16 | 47 | 47.05 | 10.46 | 95  | 2 | 21.23 | 0.065 |
| P0A1P0 | Glyceraldehyde 3 phosphate dehydrogenase                             | 35564 | 6.36  | 1107.19 | 16 | 29 | 59.21 | 7.84  | 218 | 0 | 16.15 | 0.045 |
| Q9ZF60 | Glutamate aspartate periplasmic binding protein                      | 33381 | 9.16  | 411.16  | 15 | 21 | 63.58 | 6.25  | 115 | 1 | 19.79 | 0.050 |
| P66932 | Trigger factor                                                       | 48036 | 4.64  | 309.26  | 14 | 43 | 46.99 | 11.23 | 80  | 1 | 24.45 | 0.058 |
| P02936 | Outer membrane protein A                                             | 37491 | 5.50  | 292.12  | 14 | 25 | 48.00 | 9.68  | 88  | 1 | 22.85 | 0.058 |
| Q8ZQM3 | Glutathione binding protein gsiB                                     | 56502 | 8.98  | 313.55  | 14 | 40 | 32.81 | 6.88  | 73  | 0 | 19.78 | 0.062 |
| P60446 | 50S ribosomal protein L3                                             | 22233 | 10.25 | 255.83  | 13 | 20 | 70.81 | 9.15  | 70  | 1 | 20.28 | 0.056 |
| Q8ZP20 | Periplasmic trehalase                                                | 63469 | 5.15  | 230.68  | 13 | 44 | 37.54 | 8.41  | 64  | 1 | 28.09 | 0.061 |
| P60726 | 50S ribosomal protein L4                                             | 22072 | 10.19 | 186.10  | 13 | 18 | 71.14 | 9.36  | 82  | 3 | 21.50 | 0.061 |
| Q8ZKQ1 | Autoinducer 2 binding protein lsrB                                   | 36736 | 6.53  | 366.59  | 13 | 22 | 66.18 | 8.62  | 86  | 1 | 25.30 | 0.063 |
| P17215 | Leu Ile Val Thr binding protein                                      | 38762 | 5.69  | 407.63  | 12 | 21 | 71.51 | 9.64  | 98  | 0 | 20.57 | 0.052 |
| P26982 | Protease do                                                          | 49284 | 9.19  | 319.96  | 12 | 29 | 47.58 | 6.88  | 99  | 2 | 23.03 | 0.053 |
| P65882 | Adenylosuccinate synthetase                                          | 47347 | 5.15  | 250.41  | 12 | 42 | 43.29 | 7.43  | 75  | 3 | 23.47 | 0.062 |
| P25077 | Malate dehydrogenase                                                 | 32455 | 5.97  | 718.59  | 12 | 22 | 58.33 | 6.90  | 129 | 0 | 15.69 | 0.046 |
| P02910 | Histidine binding periplasmic protein                                | 28361 | 5.95  | 458.39  | 11 | 23 | 51.15 | 4.15  | 92  | 1 | 18.78 | 0.043 |
| P0A1P6 | Glutamine synthetase                                                 | 51752 | 5.25  | 440.12  | 11 | 33 | 37.95 | 6.90  | 83  | 2 | 20.84 | 0.057 |
| P23905 | D galactose binding periplasmic protein                              | 35791 | 5.75  | 266.60  | 11 | 30 | 45.78 | 10.60 | 56  | 0 | 25.23 | 0.061 |
| Q8ZN75 | Succinyl diaminopimelate desuccinylase                               | 41552 | 5.89  | 214.97  | 11 | 26 | 54.93 | 10.31 | 63  | 2 | 19.47 | 0.060 |
| P0A2B3 | 30S ribosomal protein S7                                             | 17579 | 10.73 | 196.10  | 11 | 10 | 61.54 | 8.64  | 51  | 1 | 15.56 | 0.054 |
| Q7CQ05 | Autonomous glycyl radical cofactor                                   | 14335 | 4.92  | 548.28  | 11 | 15 | 83.46 | 6.32  | 136 | 0 | 14.14 | 0.045 |
| P0A2I5 | DNA topoisomerase 4 subunit B                                        | 70044 | 5.44  | 329.89  | 10 | 52 | 27.46 | 8.81  | 56  | 1 | 23.19 | 0.063 |
| Q8ZKP7 | Triosephosphate isomerase                                            | 26899 | 5.61  | 327.62  | 10 | 22 | 58.43 | 8.94  | 122 | 2 | 17.87 | 0.047 |
| P0A299 | 50S ribosomal protein L7 L12                                         | 12291 | 4.40  | 296.45  | 10 | 20 | 64.46 | 7.02  | 58  | 1 | 17.25 | 0.056 |
| P0A7Z7 | DNA directed RNA polymerase subunit alpha                            | 36489 | 4.78  | 289.14  | 10 | 28 | 36.17 | 10.67 | 61  | 1 | 20.45 | 0.061 |
| P58661 | Aspartate aminotransferase                                           | 43494 | 5.29  | 229.41  | 10 | 34 | 36.11 | 9.54  | 43  | 0 | 22.67 | 0.057 |
| P63411 | Acetate kinase                                                       | 43230 | 5.91  | 352.33  | 10 | 25 | 48.50 | 6.86  | 69  | 1 | 21.87 | 0.057 |
| P66313 | 50S ribosomal protein L6                                             | 18848 | 10.09 | 373.76  | 9  | 13 | 53.11 | 4.83  | 68  | 0 | 16.62 | 0.051 |
| P0A297 | 50S ribosomal protein L10                                            | 17789 | 9.46  | 332.16  | 9  | 15 | 53.33 | 9.69  | 69  | 1 | 20.41 | 0.054 |
| P66541 | 30S ribosomal protein S2                                             | 26741 | 6.73  | 311.38  | 9  | 23 | 61.83 | 9.19  | 66  | 2 | 19.35 | 0.056 |
| P02906 | Sulfate binding protein                                              | 36517 | 7.72  | 277.05  | 9  | 28 | 39.51 | 9.59  | 72  | 1 | 21.19 | 0.060 |
| Q8ZQD4 | Outer membrane lipoprotein carrier protein                           | 22467 | 7.39  | 223.51  | 9  | 17 | 71.92 | 9.62  | 48  | 0 | 21.43 | 0.059 |

|        |                                                                    |       |       |        |   |    |       |       |     |   |       |       |
|--------|--------------------------------------------------------------------|-------|-------|--------|---|----|-------|-------|-----|---|-------|-------|
| P0A2C5 | D ribose binding periplasmic protein                               | 30943 | 9.20  | 204.24 | 9 | 25 | 41.22 | 9.37  | 48  | 0 | 17.87 | 0.062 |
| Q9L4T0 | S ribosylhomocysteine lyase                                        | 19295 | 5.68  | 194.58 | 9 | 15 | 73.10 | 10.13 | 51  | 0 | 24.42 | 0.059 |
| P0A1V4 | Adenylate kinase                                                   | 23473 | 5.39  | 191.89 | 9 | 24 | 37.85 | 7.65  | 47  | 1 | 19.91 | 0.060 |
| P65889 | Phosphoribosylaminoimidazole succinocarboxamide synthase           | 26890 | 5.02  | 171.47 | 9 | 19 | 40.93 | 8.04  | 45  | 0 | 26.92 | 0.058 |
| P0A7W4 | 30S ribosomal protein S5                                           | 17592 | 10.56 | 715.24 | 9 | 13 | 60.48 | 5.45  | 98  | 0 | 15.43 | 0.046 |
| P0A2A3 | 50S ribosomal protein L1                                           | 24713 | 10.10 | 493.52 | 8 | 19 | 50.85 | 7.66  | 80  | 1 | 16.93 | 0.049 |
| Q8ZP65 | Probable thiol peroxidase                                          | 18014 | 4.74  | 446.36 | 8 | 12 | 91.67 | 7.34  | 98  | 1 | 16.99 | 0.046 |
| P0A251 | Alkyl hydroperoxide reductase subunit C                            | 20734 | 4.85  | 413.54 | 8 | 16 | 64.17 | 8.91  | 50  | 0 | 17.95 | 0.055 |
| P0A283 | Glucose specific phosphotransferase enzyme IIA component           | 18235 | 4.54  | 333.73 | 8 | 12 | 79.88 | 8.39  | 77  | 0 | 19.72 | 0.045 |
| P77983 | Pyruvate kinase I                                                  | 50625 | 5.53  | 252.87 | 8 | 33 | 27.45 | 8.24  | 49  | 2 | 19.98 | 0.059 |
| P0A2M5 | Uracil phosphoribosyltransferase                                   | 22518 | 5.17  | 235.44 | 8 | 16 | 44.23 | 8.34  | 45  | 1 | 21.03 | 0.050 |
| P69936 | NADP dependent L serine L allo threonine dehydrogenase ydfG        | 27025 | 5.78  | 214.27 | 8 | 19 | 55.24 | 11.53 | 66  | 4 | 24.22 | 0.065 |
| P0A1S2 | DNA binding protein H NS                                           | 15532 | 5.09  | 659.38 | 8 | 14 | 62.77 | 9.11  | 112 | 1 | 14.59 | 0.047 |
| Q8ZK80 | 50S ribosomal protein L9                                           | 15774 | 7.73  | 511.71 | 7 | 14 | 61.75 | 8.35  | 66  | 0 | 19.07 | 0.053 |
| P0A2H9 | Thiol disulfide interchange protein dsbA                           | 22896 | 5.55  | 430.16 | 7 | 14 | 48.79 | 9.14  | 82  | 2 | 20.84 | 0.053 |
| P0A1R8 | DNA binding protein HU beta                                        | 9234  | 10.24 | 428.06 | 7 | 9  | 73.33 | 8.61  | 73  | 0 | 16.11 | 0.050 |
| P67904 | 30S ribosomal protein S10                                          | 11759 | 10.33 | 338.35 | 7 | 11 | 58.25 | 9.18  | 55  | 0 | 21.15 | 0.049 |
| Q8ZRP4 | 2 3 4 5 tetrahydropyridine 2 6 dicarboxylate N succinyltransferase | 29833 | 5.39  | 224.01 | 7 | 25 | 33.58 | 7.23  | 37  | 1 | 19.17 | 0.066 |
| O54297 | 30S ribosomal protein S4                                           | 23470 | 10.38 | 203.32 | 7 | 19 | 36.89 | 9.03  | 43  | 0 | 20.30 | 0.052 |
| Q7CR64 | UPF0325 protein yaeH                                               | 15084 | 7.17  | 195.00 | 7 | 11 | 40.63 | 8.56  | 41  | 0 | 19.41 | 0.060 |
| P61179 | 50S ribosomal protein L22                                          | 12218 | 10.71 | 172.27 | 7 | 8  | 44.55 | 8.95  | 32  | 0 | 20.11 | 0.058 |
| P66643 | 30S ribosomal protein S9                                           | 14817 | 11.34 | 160.06 | 7 | 14 | 44.62 | 7.98  | 34  | 0 | 18.34 | 0.062 |
| P0A1S0 | Integration host factor subunit alpha                              | 11360 | 9.88  | 113.35 | 7 | 13 | 63.64 | 11.65 | 32  | 0 | 20.93 | 0.061 |
| Q7CPP7 | 50S ribosomal protein L21                                          | 11571 | 10.29 | 100.06 | 7 | 7  | 72.82 | 10.16 | 36  | 1 | 19.42 | 0.057 |
| P0A1D5 | 10 kDa chaperonin                                                  | 10311 | 5.19  | 574.56 | 7 | 7  | 83.51 | 5.29  | 96  | 0 | 16.25 | 0.049 |
| P66038 | 6 7 dimethyl 8 ribityllumazine synthase                            | 15998 | 4.91  | 231.25 | 6 | 8  | 51.28 | 9.66  | 48  | 0 | 24.94 | 0.060 |
| P0A1Z2 | Chaperone protein skp                                              | 17894 | 10.25 | 218.13 | 6 | 10 | 45.96 | 8.58  | 47  | 0 | 20.00 | 0.052 |
| P66955 | Transaldolase B                                                    | 35149 | 4.91  | 189.44 | 6 | 26 | 21.45 | 4.26  | 20  | 0 | 21.00 | 0.053 |
| P66692 | Ribose 5 phosphate isomerase A                                     | 22881 | 4.89  | 143.32 | 6 | 15 | 49.77 | 4.01  | 35  | 0 | 21.37 | 0.060 |
| P22107 | TraT complement resistance protein                                 | 26261 | 9.35  | 267.72 | 6 | 18 | 31.28 | 8.35  | 49  | 2 | 18.96 | 0.057 |
| P66593 | 30S ribosomal protein S6                                           | 15163 | 5.08  | 229.58 | 5 | 9  | 43.51 | 6.35  | 35  | 0 | 14.75 | 0.059 |
| P66193 | 50S ribosomal protein L31 type B                                   | 9808  | 9.67  | 191.28 | 5 | 9  | 62.79 | 8.54  | 44  | 1 | 15.36 | 0.063 |
| P67093 | Universal stress protein G                                         | 15891 | 6.20  | 157.42 | 5 | 9  | 61.97 | 8.43  | 42  | 2 | 21.70 | 0.050 |
| P53636 | Superoxide dismutase Cu Zn 1                                       | 18358 | 6.55  | 130.45 | 5 | 10 | 29.38 | 8.02  | 39  | 2 | 19.86 | 0.059 |
| P0A1R6 | DNA binding protein HU alpha                                       | 9515  | 10.12 | 373.28 | 5 | 7  | 73.33 | 8.55  | 84  | 1 | 17.24 | 0.048 |
| P0A7K0 | 50S ribosomal protein L11                                          | 14865 | 10.09 | 258.23 | 4 | 11 | 44.37 | 6.81  | 49  | 1 | 15.97 | 0.047 |
| P0A9Y9 | Cold shock like protein cspC                                       | 7397  | 7.70  | 233.40 | 4 | 5  | 78.26 | 6.37  | 41  | 0 | 16.95 | 0.053 |
| P0A7X0 | 30S ribosomal protein S8                                           | 14117 | 9.85  | 207.22 | 4 | 12 | 27.69 | 7.29  | 36  | 0 | 12.90 | 0.051 |
| O54296 | 30S ribosomal protein S11                                          | 13822 | 11.74 | 136.06 | 4 | 9  | 50.39 | 7.40  | 25  | 0 | 20.75 | 0.059 |
| P0AA28 | Thioredoxin 1                                                      | 11799 | 4.47  | 407.51 | 4 | 8  | 38.53 | 7.52  | 65  | 0 | 15.15 | 0.037 |
| P66170 | 50S ribosomal protein L29                                          | 7255  | 10.52 | 165.13 | 3 | 4  | 55.56 | 7.32  | 35  | 0 | 12.74 | 0.046 |
| P67179 | UPF0082 protein yebC                                               | 26401 | 4.53  | 130.03 | 3 | 16 | 20.33 | 4.69  | 19  | 0 | 16.00 | 0.056 |
| P0A1P8 | Glutaredoxin 1                                                     | 9917  | 5.54  | 90.06  | 3 | 10 | 60.92 | 7.67  | 19  | 1 | 17.09 | 0.061 |
| Q7CPL7 | 50S ribosomal protein L17                                          | 14385 | 11.46 | 88.51  | 3 | 8  | 22.05 | 9.28  | 15  | 0 | 12.33 | 0.052 |
| P0A2A7 | 50S ribosomal protein L30                                          | 6509  | 11.41 | 84.81  | 3 | 6  | 45.76 | 6.76  | 15  | 0 | 18.26 | 0.054 |
| P67091 | Universal stress protein F                                         | 15704 | 5.92  | 184.30 | 3 | 11 | 40.28 | 11.91 | 29  | 0 | 16.42 | 0.061 |

SA123 + Zn(II) LC-MS run 3: 123\_Zn\_220709\_1a2\_03

| Accession | Description                                                 | mW (Da) | pI (pH) | PLGS Score | Peptides | Theoretical Peptides | Coverage (%) | Precursor RMS Mass Error (ppm) | Products | Modified Peptides | Products RMS Mass Error (ppm) | Products RMS RT Error (min) |
|-----------|-------------------------------------------------------------|---------|---------|------------|----------|----------------------|--------------|--------------------------------|----------|-------------------|-------------------------------|-----------------------------|
| P0A1D3    | 60 kDa chaperonin                                           | 57249   | 4.65    | 1199.69    | 28       | 44                   | 74.09        | 6.49                           | 231      | 2                 | 17.72                         | 0.058                       |
| P06202    | Periplasmic oligopeptide binding protein                    | 61254   | 6.03    | 586.64     | 23       | 42                   | 54.70        | 7.96                           | 156      | 0                 | 18.14                         | 0.066                       |
| P0A1H3    | Elongation factor G                                         | 77550   | 5.00    | 499.57     | 21       | 47                   | 52.27        | 7.08                           | 143      | 2                 | 21.35                         | 0.064                       |
| P41031    | Thiosulfate binding protein                                 | 37559   | 9.19    | 652.53     | 20       | 32                   | 72.49        | 7.08                           | 153      | 2                 | 16.69                         | 0.063                       |
| P10503    | Bifunctional protein putA                                   | 143999  | 5.69    | 471.48     | 20       | 91                   | 24.02        | 10.49                          | 91       | 1                 | 24.42                         | 0.069                       |
| P52616    | Phase 2 flagellin                                           | 52504   | 4.55    | 352.85     | 20       | 37                   | 62.85        | 8.43                           | 107      | 0                 | 22.81                         | 0.070                       |
| Q7CPE1    | ATP synthase subunit alpha                                  | 55078   | 5.61    | 310.69     | 20       | 40                   | 49.32        | 9.30                           | 107      | 1                 | 23.77                         | 0.065                       |
| P64076    | Enolase                                                     | 45570   | 5.08    | 1114.49    | 20       | 34                   | 73.15        | 7.82                           | 202      | 0                 | 19.08                         | 0.055                       |
| P0A1H5    | Elongation factor Tu                                        | 43256   | 5.15    | 1435.78    | 19       | 30                   | 70.81        | 8.10                           | 277      | 2                 | 15.91                         | 0.055                       |
| Q56073    | Chaperone protein dnaK                                      | 69215   | 4.64    | 566.00     | 18       | 59                   | 51.10        | 9.24                           | 101      | 0                 | 20.38                         | 0.065                       |
| Q7CPE2    | ATP synthase subunit beta                                   | 50251   | 4.71    | 599.23     | 17       | 32                   | 55.00        | 8.18                           | 110      | 1                 | 19.03                         | 0.063                       |
| P65702    | Phosphoglycerate kinase                                     | 41106   | 4.90    | 1031.61    | 17       | 30                   | 54.78        | 6.76                           | 175      | 0                 | 16.53                         | 0.053                       |
| P00924    | Enolase 1                                                   | 46773   | 6.15    | 385.62     | 16       | 28                   | 53.09        | 8.55                           | 90       | 2                 | 21.44                         | 0.054                       |
| P17215    | Leu Ile Val Thr binding protein                             | 38762   | 5.69    | 377.83     | 16       | 21                   | 72.88        | 9.03                           | 108      | 1                 | 20.54                         | 0.066                       |
| P0A1P6    | Glutamine synthetase                                        | 51752   | 5.25    | 485.92     | 16       | 33                   | 54.16        | 6.89                           | 97       | 1                 | 21.26                         | 0.068                       |
| Q7CR87    | Chaperone surA                                              | 47221   | 6.88    | 274.23     | 15       | 31                   | 57.01        | 8.26                           | 85       | 0                 | 19.24                         | 0.057                       |
| P64052    | Elongation factor Ts                                        | 30338   | 4.95    | 579.70     | 15       | 33                   | 74.56        | 6.98                           | 101      | 1                 | 18.18                         | 0.063                       |
| P25077    | Malate dehydrogenase                                        | 32455   | 5.97    | 549.44     | 14       | 22                   | 55.77        | 5.29                           | 126      | 1                 | 16.56                         | 0.061                       |
| Q8ZL56    | 2 3 bisphosphoglycerate independent phosphoglycerate mutase | 56219   | 4.88    | 306.20     | 14       | 37                   | 53.31        | 8.96                           | 88       | 3                 | 21.01                         | 0.073                       |
| P55900    | Phosphoserine aminotransferase                              | 39806   | 5.17    | 206.55     | 14       | 28                   | 40.33        | 9.62                           | 67       | 2                 | 24.27                         | 0.066                       |
| P0A1P0    | Glyceraldehyde 3 phosphate dehydrogenase                    | 35564   | 6.36    | 1035.44    | 14       | 29                   | 51.66        | 7.64                           | 205      | 1                 | 16.91                         | 0.055                       |
| Q7CQ05    | Autonomous glycyI radical cofactor                          | 14335   | 4.92    | 522.15     | 13       | 15                   | 84.25        | 8.04                           | 137      | 0                 | 15.25                         | 0.053                       |
| P06179    | Flagellin                                                   | 51581   | 4.60    | 374.61     | 13       | 36                   | 42.42        | 5.99                           | 74       | 0                 | 19.25                         | 0.061                       |
| P67912    | ADP L glycerol D mannose 6 epimerase                        | 34827   | 4.72    | 314.39     | 13       | 33                   | 47.10        | 10.59                          | 76       | 1                 | 24.64                         | 0.065                       |
| P0A7W4    | 30S ribosomal protein S5                                    | 17592   | 10.56   | 601.97     | 13       | 13                   | 83.23        | 7.46                           | 113      | 0                 | 18.97                         | 0.055                       |
| Q8ZQT5    | Protein tolB                                                | 46120   | 8.73    | 336.94     | 11       | 21                   | 37.91        | 9.59                           | 65       | 0                 | 19.37                         | 0.058                       |
| P0A2E1    | Serine hydroxymethyltransferase                             | 45426   | 6.02    | 324.27     | 11       | 36                   | 36.21        | 10.89                          | 64       | 0                 | 17.81                         | 0.069                       |
| O33921    | Glucose 1 phosphatase                                       | 45530   | 6.64    | 300.82     | 11       | 25                   | 54.24        | 6.04                           | 82       | 1                 | 20.02                         | 0.067                       |
| P23905    | D galactose binding periplasmic protein                     | 35791   | 5.75    | 205.77     | 11       | 30                   | 56.33        | 9.26                           | 67       | 2                 | 22.72                         | 0.064                       |
| P77983    | Pyruvate kinase I                                           | 50625   | 5.53    | 204.47     | 11       | 33                   | 35.11        | 8.65                           | 52       | 1                 | 23.55                         | 0.069                       |
| Q8ZRN1    | D methionine binding lipoprotein metQ                       | 29417   | 5.23    | 194.55     | 11       | 30                   | 50.18        | 7.59                           | 46       | 1                 | 21.78                         | 0.068                       |
| Q8ZP20    | Periplasmic trehalase                                       | 63469   | 5.15    | 191.03     | 11       | 44                   | 27.89        | 9.35                           | 48       | 2                 | 22.17                         | 0.067                       |
| P65889    | Phosphoribosylaminoimidazole succinocarboxamide synthase    | 26890   | 5.02    | 178.89     | 11       | 19                   | 53.16        | 6.60                           | 51       | 0                 | 24.26                         | 0.062                       |
| P0A1E3    | Cysteine synthase A                                         | 34514   | 5.72    | 606.01     | 11       | 20                   | 43.34        | 5.40                           | 92       | 1                 | 15.43                         | 0.058                       |
| Q9ZF60    | Glutamate aspartate periplasmic binding protein             | 33381   | 9.16    | 378.80     | 10       | 21                   | 63.58        | 6.82                           | 90       | 2                 | 14.82                         | 0.063                       |
| P14845    | Carbamoyl phosphate synthase small chain                    | 41625   | 6.00    | 338.00     | 10       | 27                   | 43.98        | 6.87                           | 57       | 1                 | 20.64                         | 0.067                       |
| P0A1Z2    | Chaperone protein skp                                       | 17894   | 10.25   | 316.16     | 10       | 10                   | 61.49        | 6.33                           | 78       | 1                 | 15.53                         | 0.059                       |
| P63411    | Acetate kinase                                              | 43230   | 5.91    | 305.39     | 10       | 25                   | 45.00        | 9.67                           | 61       | 0                 | 25.64                         | 0.067                       |
| P58661    | Aspartate aminotransferase                                  | 43494   | 5.29    | 259.04     | 10       | 34                   | 33.08        | 6.26                           | 49       | 0                 | 25.07                         | 0.062                       |
| P66541    | 30S ribosomal protein S2                                    | 26741   | 6.73    | 163.84     | 10       | 23                   | 48.55        | 9.00                           | 50       | 0                 | 22.42                         | 0.062                       |
| Q8ZP65    | Probable thiol peroxidase                                   | 18014   | 4.74    | 431.43     | 10       | 12                   | 91.67        | 7.10                           | 109      | 1                 | 18.65                         | 0.060                       |
| P0A2C5    | D ribose binding periplasmic protein                        | 30943   | 9.20    | 214.55     | 9        | 25                   | 34.46        | 7.92                           | 49       | 1                 | 17.85                         | 0.066                       |
| P0A7Z7    | DNA directed RNA polymerase subunit alpha                   | 36489   | 4.78    | 167.50     | 9        | 28                   | 37.39        | 11.52                          | 40       | 0                 | 21.32                         | 0.072                       |
| P0A1C3    | Acetyl coenzyme A carboxylase carboxyl transferase subunit  | 35321   | 5.21    | 125.70     | 9        | 24                   | 43.26        | 6.97                           | 55       | 1                 | 20.04                         | 0.065                       |

|        |                                                             |       |       |        |   |    |       |       |     |   |       |       |
|--------|-------------------------------------------------------------|-------|-------|--------|---|----|-------|-------|-----|---|-------|-------|
|        | alpha                                                       |       |       |        |   |    |       |       |     |   |       |       |
| Q9L4T0 | S ribosylhomocysteine lyase                                 | 19295 | 5.68  | 121.93 | 9 | 15 | 73.10 | 9.90  | 42  | 1 | 20.15 | 0.071 |
| P26982 | Protease do                                                 | 49284 | 9.19  | 352.83 | 9 | 29 | 30.95 | 7.15  | 77  | 3 | 17.85 | 0.055 |
| P0A297 | 50S ribosomal protein L10                                   | 17789 | 9.46  | 489.25 | 8 | 15 | 53.33 | 8.05  | 75  | 1 | 17.82 | 0.065 |
| P02910 | Histidine binding periplasmic protein                       | 28361 | 5.95  | 475.21 | 8 | 23 | 44.23 | 7.69  | 73  | 1 | 16.49 | 0.050 |
| Q8ZK80 | 50S ribosomal protein L9                                    | 15774 | 7.73  | 453.16 | 8 | 14 | 71.81 | 7.52  | 67  | 0 | 18.17 | 0.050 |
| P0A299 | 50S ribosomal protein L7 L12                                | 12291 | 4.40  | 357.15 | 8 | 20 | 74.38 | 7.86  | 68  | 1 | 18.64 | 0.071 |
| P0A283 | Glucose specific phosphotransferase enzyme IIA component    | 18235 | 4.54  | 327.61 | 8 | 12 | 71.60 | 11.88 | 73  | 0 | 18.19 | 0.057 |
| P0A1V4 | Adenylate kinase                                            | 23473 | 5.39  | 305.34 | 8 | 24 | 37.38 | 8.13  | 60  | 2 | 17.72 | 0.063 |
| P02906 | Sulfate binding protein                                     | 36517 | 7.72  | 224.17 | 8 | 28 | 40.12 | 9.14  | 41  | 0 | 27.20 | 0.059 |
| Q8ZKQ1 | Autoinducer 2 binding protein lsrB                          | 36736 | 6.53  | 193.89 | 8 | 22 | 45.29 | 7.78  | 50  | 0 | 18.92 | 0.066 |
| P0A1A5 | Branched chain amino acid aminotransferase                  | 34031 | 5.47  | 174.38 | 8 | 26 | 33.66 | 7.88  | 35  | 1 | 28.52 | 0.072 |
| P26219 | CDP diacylglycerol pyrophosphatase                          | 28349 | 6.86  | 163.77 | 8 | 21 | 61.75 | 7.47  | 36  | 1 | 23.45 | 0.068 |
| O68883 | Citrate synthase                                            | 48074 | 6.26  | 162.26 | 8 | 33 | 33.49 | 7.58  | 49  | 0 | 19.12 | 0.066 |
| P60726 | 50S ribosomal protein L4                                    | 22072 | 10.19 | 134.45 | 8 | 18 | 44.78 | 10.84 | 48  | 0 | 20.43 | 0.058 |
| P0A2A3 | 50S ribosomal protein L1                                    | 24713 | 10.10 | 500.88 | 8 | 19 | 38.46 | 6.37  | 79  | 1 | 17.58 | 0.062 |
| P0AA28 | Thioredoxin 1                                               | 11799 | 4.47  | 419.50 | 7 | 8  | 62.39 | 8.28  | 77  | 0 | 16.32 | 0.050 |
| P60446 | 50S ribosomal protein L3                                    | 22233 | 10.25 | 224.72 | 7 | 20 | 38.28 | 6.74  | 44  | 0 | 19.04 | 0.059 |
| Q8ZRC9 | UPF0234 protein yajQ                                        | 18307 | 5.42  | 164.92 | 7 | 14 | 48.47 | 9.61  | 35  | 0 | 23.69 | 0.069 |
| P0A2B3 | 30S ribosomal protein S7                                    | 17579 | 10.73 | 126.60 | 7 | 10 | 42.31 | 10.47 | 39  | 0 | 19.91 | 0.068 |
| P66643 | 30S ribosomal protein S9                                    | 14817 | 11.34 | 121.33 | 7 | 14 | 49.23 | 5.77  | 27  | 0 | 13.23 | 0.062 |
| P0AA19 | Transcriptional regulatory protein ompR                     | 27336 | 5.99  | 100.52 | 7 | 23 | 49.79 | 12.70 | 40  | 1 | 18.28 | 0.065 |
| P0A1S2 | DNA binding protein H NS                                    | 15532 | 5.09  | 511.21 | 7 | 14 | 49.64 | 8.28  | 107 | 3 | 14.51 | 0.051 |
| P0A2H9 | Thiol disulfide interchange protein dsbA                    | 22896 | 5.55  | 360.89 | 6 | 14 | 45.41 | 7.25  | 70  | 1 | 19.43 | 0.058 |
| P66593 | 30S ribosomal protein S6                                    | 15163 | 5.08  | 310.77 | 6 | 9  | 63.36 | 7.54  | 59  | 2 | 13.76 | 0.062 |
| O54297 | 30S ribosomal protein S4                                    | 23470 | 10.38 | 294.62 | 6 | 19 | 36.89 | 7.76  | 53  | 1 | 21.34 | 0.057 |
| P0A251 | Alkyl hydroperoxide reductase subunit C                     | 20734 | 4.85  | 287.14 | 6 | 16 | 56.68 | 9.72  | 42  | 0 | 17.12 | 0.067 |
| P66313 | 50S ribosomal protein L6                                    | 18848 | 10.09 | 284.87 | 6 | 13 | 42.37 | 6.83  | 47  | 0 | 15.63 | 0.048 |
| P0A7X0 | 30S ribosomal protein S8                                    | 14117 | 9.85  | 281.45 | 6 | 12 | 47.69 | 8.16  | 56  | 0 | 18.28 | 0.058 |
| Q8ZKP7 | Triosephosphate isomerase                                   | 26899 | 5.61  | 263.70 | 6 | 22 | 34.51 | 8.78  | 86  | 1 | 16.69 | 0.049 |
| P69936 | NADP dependent L serine L allo threonine dehydrogenase ydfG | 27025 | 5.78  | 219.32 | 6 | 19 | 49.60 | 6.95  | 39  | 1 | 17.82 | 0.069 |
| P53636 | Superoxide dismutase Cu Zn 1                                | 18358 | 6.55  | 204.98 | 6 | 10 | 24.86 | 9.89  | 40  | 1 | 17.04 | 0.058 |
| P35891 | Chromosomal replication initiator protein dnaA              | 52565 | 9.11  | 195.38 | 6 | 51 | 19.10 | 10.93 | 27  | 0 | 23.77 | 0.068 |
| P0A2M5 | Uracil phosphoribosyltransferase                            | 22518 | 5.17  | 162.49 | 6 | 16 | 50.00 | 6.87  | 34  | 1 | 15.13 | 0.061 |
| P0A1R8 | DNA binding protein HU beta                                 | 9234  | 10.24 | 158.80 | 6 | 9  | 68.89 | 10.88 | 49  | 0 | 15.14 | 0.044 |
| P66692 | Ribose 5 phosphate isomerase A                              | 22881 | 4.89  | 156.15 | 6 | 15 | 37.90 | 8.08  | 38  | 0 | 20.24 | 0.064 |
| O54296 | 30S ribosomal protein S11                                   | 13822 | 11.74 | 116.67 | 6 | 9  | 65.12 | 8.39  | 28  | 0 | 24.67 | 0.063 |
| P0A8B8 | UPF0133 protein ybaB                                        | 12006 | 4.82  | 100.29 | 6 | 11 | 74.31 | 9.94  | 29  | 0 | 20.49 | 0.071 |
| P0A1D5 | 10 kDa chaperonin                                           | 10311 | 5.19  | 600.55 | 6 | 7  | 74.23 | 5.78  | 88  | 0 | 14.73 | 0.055 |
| P0A9Y9 | Cold shock like protein cspC                                | 7397  | 7.70  | 279.34 | 5 | 5  | 78.26 | 6.83  | 45  | 0 | 12.68 | 0.060 |
| Q7CPL5 | 50S ribosomal protein L14                                   | 13559 | 10.89 | 189.98 | 5 | 14 | 44.72 | 9.20  | 50  | 2 | 18.23 | 0.057 |
| Q8ZPD6 | Uncharacterized protein yncE                                | 38480 | 9.55  | 164.75 | 5 | 27 | 22.66 | 9.91  | 26  | 0 | 27.34 | 0.069 |
| Q7CPL7 | 50S ribosomal protein L17                                   | 14385 | 11.46 | 149.26 | 5 | 8  | 32.28 | 7.76  | 27  | 0 | 18.62 | 0.063 |
| P67093 | Universal stress protein G                                  | 15891 | 6.20  | 138.15 | 5 | 9  | 64.08 | 10.20 | 29  | 0 | 23.06 | 0.067 |
| P67904 | 30S ribosomal protein S10                                   | 11759 | 10.33 | 300.83 | 5 | 11 | 48.54 | 11.06 | 42  | 0 | 20.99 | 0.055 |
| P67091 | Universal stress protein F                                  | 15704 | 5.92  | 217.64 | 4 | 11 | 48.61 | 7.98  | 34  | 1 | 17.97 | 0.061 |
| P61179 | 50S ribosomal protein L22                                   | 12218 | 10.71 | 107.54 | 4 | 8  | 27.27 | 7.74  | 21  | 0 | 13.66 | 0.071 |
| Q7CPZ4 | Protein grpE                                                | 21827 | 4.49  | 102.32 | 4 | 18 | 41.33 | 5.87  | 19  | 0 | 23.03 | 0.066 |

|        |                                         |       |       |        |   |    |       |      |    |   |       |       |
|--------|-----------------------------------------|-------|-------|--------|---|----|-------|------|----|---|-------|-------|
| Q8ZRE7 | UPF0345 protein yaiE                    | 10151 | 4.82  | 88.65  | 4 | 6  | 53.19 | 6.75 | 14 | 0 | 19.79 | 0.066 |
| P66038 | 6 7 dimethyl 8 ribityllumazine synthase | 15998 | 4.91  | 269.69 | 4 | 8  | 36.54 | 7.44 | 41 | 0 | 20.57 | 0.068 |
| Q7CPL6 | 50S ribosomal protein L18               | 12761 | 10.88 | 135.74 | 3 | 9  | 19.66 | 7.09 | 16 | 0 | 20.09 | 0.053 |
| Q7CPD8 | UPF0438 protein yifE                    | 13069 | 6.23  | 116.79 | 3 | 13 | 18.75 | 9.43 | 15 | 0 | 22.05 | 0.059 |
| P0A2F0 | RNA polymerase sigma E factor           | 21698 | 5.20  | 116.63 | 3 | 17 | 30.89 | 2.44 | 23 | 1 | 20.94 | 0.072 |
| P0A2F4 | Superoxide dismutase Fe                 | 21294 | 5.52  | 93.27  | 3 | 14 | 39.90 | 3.59 | 32 | 1 | 17.57 | 0.073 |
| P0A1R6 | DNA binding protein HU alpha            | 9515  | 10.12 | 273.02 | 3 | 7  | 56.67 | 6.53 | 40 | 0 | 13.10 | 0.054 |
