# Supplementary material for: Phenotypic profile linked to inhibition of the major Zn influx system in Salmonella enterica : proteomics and ionomics investigations
Source: Royal Society of Chemistry journal article supplement (doi:10.1039/c0mb00140f), 2010-10-20
Supplement: c0mb00140f.zip [file c0mb00140f.zip]

## 123 LC-MS run 3: 123\_220709\_1a2\_03

| Protein name             | Peptide Rank | Peptide Modification  | Peptide Sequence                   | Peptide sequence start | Peptide sequence Length | Peptide Matched Products | Peptide Score | By Matches                                                                                              | Precursor MH+ (Da) | Retention time (min) | Intensity | z | Precursor m/z | MH+ Error (ppm) |
|--------------------------|--------------|-----------------------|------------------------------------|------------------------|-------------------------|--------------------------|---------------|---------------------------------------------------------------------------------------------------------|--------------------|----------------------|-----------|---|---------------|-----------------|
| P64076 ENO_SALTY Enolase | 1            |                       | FNQIGSLTETLAAIK                    | 342                    | 15                      | 29                       | 209.16        | b2*b2b3*b3b4b5b7*b7b13°b13b14°b14y1y2y3y4y5y6y7y8y9y10y11°y11y12y13*y13y15*y15                          | 1605.89            | 85.787               | 518654    | 2 | 803.45        | 2.28            |
| P64076 ENO_SALTY Enolase | 2            |                       | SGETEDATIADLAVGTAAGQIK             | 371                    | 22                      | 39                       | 374.09        | b2°b2b3b4b5b6b8°b8b9°b9b11b13°b13b14b15b16b18b20b22y2y3y4*y4y5y6y7y8°y8y9y10y11y12y13y14y15y16y17y18y22 | 2118.07            | 75.203               | 362555    | 2 | 1059.54       | 5.76            |
| P64076 ENO_SALTY Enolase | 3            |                       | GMNTAVGDEGGYAPNLGSNAEALAVIAEAVK    | 200                    | 31                      | 32                       | 220.02        | b2b4b5°b5b6°b6*b6b12b13b16b25b26b30y2y3y4°y4y5y6y7y8y10y11y14y15*y15y18y19y25*y25y26y31                 | 2989.46            | 94.871               | 182888    | 3 | 997.16        | 1.63            |
| P64076 ENO_SALTY Enolase | 4            |                       | DAGYTAVISHR                        | 360                    | 11                      | 12                       | 109.64        | b2b3°b3b7b8y3y4y5y6y7y9y11                                                                              | 1189.59            | 41.382               | 133760    | 2 | 595.30        | -7.49           |
| P64076 ENO_SALTY Enolase | 5            |                       | YSMPVPMMNININGEHADNNVDIQEFMIQPVGAK | 143                    | 34                      | 18                       | 80.34         | b2°b2b5b23y2y3y5y6*y6y7y8y9y13°y13*y13y29y31y34                                                         | 3759.77            | 98.457               | 127115    | 3 | 1253.93       | 1.17            |
| P64076 ENO_SALTY Enolase | 6            |                       | AVGAVNGPIAQAILGK                   | 66                     | 16                      | 12                       | 60.24         | b1b2b3b4b5b7°b7y2y3y11y12y16                                                                            | 1478.87            | 75.088               | 126487    | 2 | 739.94        | -0.58           |
| P64076 ENO_SALTY Enolase | 7            |                       | GIANSILIK                          | 333                    | 9                       | 5                        | 37.96         | y2y3y6y7y9                                                                                              | 928.57             | 60.932               | 115247    | 2 | 464.79        | -10.85          |
| P64076 ENO_SALTY Enolase | 8            |                       | YVLAGEGNK                          | 257                    | 9                       | 12                       | 61.16         | b1b2b7y5y6y7°y7*y7y8°y8y9*y9                                                                            | 950.50             | 33.155               | 84391     | 2 | 475.75        | 4.94            |
| P64076 ENO_SALTY Enolase | 9            |                       | GMPLYEHIAELNGTPGK                  | 126                    | 17                      | 5                        | 24.75         | b2y2y3y4y12                                                                                             | 1826.90            | 67.474               | 82843     | 3 | 609.64        | -4.14           |
| P64076 ENO_SALTY Enolase | 10           |                       | QLVGDDLFVTNTK                      | 311                    | 14                      | 15                       | 88.75         | b2*b2b3b4y1y2y4y5*y5y9y10y11°y11y12y14                                                                  | 1562.85            | 77.580               | 82641     | 2 | 781.93        | 2.58            |
| P64076 ENO_SALTY Enolase | 11           |                       | QYPIVSIEDGLDESDWDGFAYQTK           | 282                    | 24                      | 11                       | 36.82         | b2b12y1y4*y4y5°y5y6*y6y8y24                                                                             | 2776.27            | 93.599               | 39559     | 2 | 1388.64       | 3.17            |
| P64076 ENO_SALTY Enolase | 12           |                       | IEEALGEK                           | 411                    | 8                       | 7                        | 66.77         | y3y4y5y6°y6y7y8                                                                                         | 888.46             | 31.006               | 35777     | 2 | 444.73        | -10.65          |
| P64076 ENO_SALTY Enolase | 13           | Carbamidomethyl+C(16) | AAGYELGKIDITLAMCAASEFYKDGK         | 231                    | 26                      | 5                        | 18.05         | b7°b7b9b15y3                                                                                            | 2824.30            | 101.709              | 13739     | 4 | 706.83        | -7.69           |
| P64076 ENO_SALTY Enolase | 14           |                       | EALELRDGDK                         | 46                     | 10                      | 5                        | 26.62         | b2b3y3y9y10                                                                                             | 1145.58            | 54.318               | 9794      | 2 | 573.29        | -3.41           |
| P64076 ENO_SALTY Enolase | 15           |                       | AFTSEEFTHFLEELTK                   | 266                    | 16                      | 9                        | 34.31         | b2b3°b3b9b11°b11b16y10y15                                                                               | 1928.94            | 107.347              | 9584      | 2 | 964.97        | 4.05            |
| P64076 ENO_SALTY Enolase | 16           |                       | AVGAVNGPIAQAILGKDAKDQAGIDK         | 66                     | 26                      | 3                        | 21.79         | b3b4y10                                                                                                 | 2520.35            | 87.673               | 5314      | 3 | 840.79        | -11.43          |
| P64076 ENO_SALTY Enolase | 17           |                       | GNPTVEAEVHLEGGFVGMAAAPSGASTGSR     | 16                     | 30                      | 4                        | 13.97         | b11b15y15y18                                                                                            | 2856.35            | 102.248              | 4152      | 3 | 952.79        | -4.53           |
| P64076 ENO_SALTY Enolase | 18           |                       | EIIDSR                             | 10                     | 6                       | 1                        | 13.52         | b4                                                                                                      | 732.39             | 28.087               | 17280     | 1 | 732.39        | -3.25           |
| P64076 ENO_SALTY Enolase | 19           |                       | EALELR                             | 46                     | 6                       | 2                        | 26.63         | y3y4                                                                                                    | 730.40             | 40.861               | 3574      | 2 | 365.70        | -14.62          |
| P64076 ENO_SALTY Enolase | 20           |                       | GKGMNTAVGDEGGYAPNLGSNAEALAVIAEAVK  | 198                    | 33                      | 4                        | 15.42         | b5b7b15y26                                                                                              | 3174.59            | 90.017               | 40768     | 3 | 1058.87       | 4.00            |
| P64076 ENO_SALTY Enolase | 21           |                       | EAIRMGSEVFHHLAK                    | 180                    | 15                      | 3                        | 25.98         | b6b9b10                                                                                                 | 1724.87            | 90.060               | 4106      | 3 | 575.63        | -9.27           |
| P64076 ENO_SALTY Enolase | 22           | Oxidation+M(3)        | YSMPVPMMNININGEHADNNVDIQEFMIQPVGAK | 143                    | 34                      | 3                        | 22.25         | b5b6y11                                                                                                 | 3775.76            | 98.482               | 4984      | 3 | 1259.26       | -0.71           |
| P64076 ENO_SALTY Enolase | 23           |                       | GYTAVISHR                          | 362                    | 9                       | 0                        | 2.49          |                                                                                                         | 1003.53            | 41.361               | 54448     | 2 | 502.27        | -3.59           |
| P64076 ENO_SALTY Enolase | 24           |                       | ANSILIK                            | 335                    | 7                       | 5                        | 23.1          | b3°b3*b3b4°b4                                                                                           | 758.47             | 60.941               | 20630     | 1 | 758.47        | -3.22           |
| P64076 ENO_SALTY Enolase | 25           |                       | DAGYTAVISHR                        | 360                    | 11                      | 0                        | 2.49          |                                                                                                         | 1171.57            | 41.301               | 3172      | 3 | 391.19        | -11.98          |

|                                        |    |                      |                          |     |    |    |        |                                                                                                                                    |         |         |        |   |         |        |
|----------------------------------------|----|----------------------|--------------------------|-----|----|----|--------|------------------------------------------------------------------------------------------------------------------------------------|---------|---------|--------|---|---------|--------|
| P0A1D5 CH10_SALTY 10 kDa chaperonin    | 1  |                      | ILDNGTVQPLDVK            | 47  | 13 | 25 | 165.9  | b2b3b4*b4b8*b8*b8b10b11°b11*b11b13y1y2y3y5y7y8y9y10y11°y11*y11y12y13                                                               | 1411.77 | 57.237  | 323434 | 2 | 706.39  | -3.63  |
| P0A1D5 CH10_SALTY 10 kDa chaperonin    | 2  |                      | VGDIVIFNDGYGVK           | 60  | 14 | 18 | 189.52 | b3b4b5°b5b6b11b13y2y3y4y5y6y7y8y9y10y11y14                                                                                         | 1495.78 | 73.450  | 295070 | 2 | 748.39  | -0.08  |
| P0A1D5 CH10_SALTY 10 kDa chaperonin    | 3  |                      | SAGGIVLTGSAAGK           | 20  | 14 | 17 | 118.55 | b2b3°b3b4b5°b5b14y2y3y4y6y7y8°y8y9y12y14                                                                                           | 1188.65 | 43.513  | 244587 | 2 | 594.83  | -5.13  |
| P0A1D5 CH10_SALTY 10 kDa chaperonin    | 4  |                      | GEIIVGVK                 | 37  | 8  | 7  | 53.67  | b2y2y3y4y5y6y8                                                                                                                     | 786.46  | 41.494  | 24722  | 2 | 393.73  | -12.03 |
| P0A1D5 CH10_SALTY 10 kDa chaperonin    | 5  |                      | SEKIDNEEVLIMSESDILAIVEA  | 74  | 23 | 6  | 23.53  | b6b9b10*b10y12°y12                                                                                                                 | 2547.26 | 136.258 | 6223   | 2 | 1274.13 | -6.61  |
| P0A1D5 CH10_SALTY 10 kDa chaperonin    | 6  |                      | VGDIVIFNDGYGVKSEK        | 60  | 17 | 4  | 27.06  | b11y10y11y15                                                                                                                       | 1839.93 | 111.362 | 3576   | 2 | 920.47  | -7.90  |
| P0A1D5 CH10_SALTY 10 kDa chaperonin    | 7  | Phosphoryl STY(6)    | ILDNGTVQPLDVK            | 47  | 13 | 3  | 29.62  | y6y8y10                                                                                                                            | 1491.72 | 37.040  | 1959   | 2 | 746.36  | -9.00  |
| P0A1D5 CH10_SALTY 10 kDa chaperonin    | 8  |                      | SAGGIVLTGSAAGK           | 20  | 14 | 0  | 3.73   |                                                                                                                                    | 1170.64 | 43.534  | 43902  | 2 | 585.82  | -1.67  |
| P0A1H5 EFTU_SALTY Elongation factor Tu | 1  |                      | ELLSQYDFPGDDTPIVR        | 155 | 17 | 31 | 236.2  | b2°b2b5°b5b6°b6b8°b8b12b13b15b16y1y3y4y5y6y8y9°y9y10°y10y11°y11y12°y12y13°y13y14y15y17                                             | 1964.97 | 76.748  | 331546 | 2 | 982.99  | 2.80   |
| P0A1H5 EFTU_SALTY Elongation factor Tu | 2  |                      | AIDKPFLLPIDVFSISGR       | 205 | 19 | 13 | 115.91 | b2b5b7b8b12y3y4y5y6y7y8y11y15                                                                                                      | 2117.15 | 105.916 | 320492 | 3 | 706.39  | -7.15  |
| P0A1H5 EFTU_SALTY Elongation factor Tu | 3  |                      | GITINTSHVEYDTPTR         | 59  | 16 | 25 | 196.76 | b2b3°b3b10°b10b11b12b16y1y3y4y5y6°y6y7°y7y8°y8y9y10y11y12y13y14y16                                                                 | 1803.86 | 49.568  | 259057 | 3 | 601.96  | -13.06 |
| P0A1H5 EFTU_SALTY Elongation factor Tu | 4  |                      | AGENVGVLLR               | 270 | 10 | 11 | 71.67  | b4°b4b5°b5°b5y1y3y4y5y6y10                                                                                                         | 1027.58 | 56.361  | 253492 | 2 | 514.29  | -9.50  |
| P0A1H5 EFTU_SALTY Elongation factor Tu | 5  |                      | TTDVTGTIELPEGVEMVMPGDNIK | 334 | 24 | 45 | 284.17 | b1b2°b2b3°b3b4b7°b7b8°b8b10°b10b13b14b15b16°b16b17°b17b18y3y5°y5y6°y6*y6y7°y7*y7y8y9*y9y10y12y13°y13y14*y14y15y16°y16y17y20y24*y24 | 2546.25 | 86.587  | 247851 | 2 | 1273.63 | 4.41   |
| P0A1H5 EFTU_SALTY Elongation factor Tu | 6  |                      | QVGVPYIIVFLNK            | 124 | 13 | 12 | 82.6   | b3b4°b4b6°b6b13y4y5y6y9y11y13                                                                                                      | 1489.88 | 99.160  | 245054 | 2 | 745.44  | 0.41   |
| P0A1H5 EFTU_SALTY Elongation factor Tu | 7  |                      | IELAGFLDSYIPEPER         | 188 | 17 | 24 | 187.18 | b2b3b7b11°b11b12b14y1y2y3°y3y4°y4y5y6y7y8°y8y9y10y11y12y13y17                                                                      | 1962.03 | 101.876 | 216149 | 2 | 981.52  | 3.98   |
| P0A1H5 EFTU_SALTY Elongation factor Tu | 8  |                      | ALEGDAEWEAK              | 177 | 11 | 7  | 35.78  | b1b2y1y4°y4y6y9                                                                                                                    | 1218.56 | 46.240  | 133862 | 2 | 609.78  | -4.51  |
| P0A1H5 EFTU_SALTY Elongation factor Tu | 9  | Carbamidomethyl+C(3) | STCTGVEMFR               | 253 | 10 | 7  | 67.6   | b2y3y4y6y7y8y10                                                                                                                    | 1187.51 | 52.849  | 117169 | 2 | 594.26  | -5.55  |
| P0A1H5 EFTU_SALTY Elongation factor Tu | 10 | Carbamidomethyl+C(1) | CDMVDDEELLEVEMEVR        | 137 | 18 | 17 | 127.47 | b2b3b9b13y2y3°y3y4y5°y5y6y7y8°y8y9y13y14                                                                                           | 2224.00 | 106.003 | 47933  | 2 | 1112.50 | 6.15   |
| P0A1H5 EFTU_SALTY Elongation factor Tu | 11 |                      | TTLTAAITTVLAK            | 25  | 13 | 4  | 42.73  | y7y8y9y11                                                                                                                          | 1303.78 | 84.694  | 276673 | 2 | 652.39  | -2.43  |
| P0A1H5 EFTU_SALTY Elongation factor Tu | 12 |                      | TVGAGVVAK                | 382 | 9  | 4  | 54.08  | y3y6y7y8                                                                                                                           | 801.47  | 28.243  | 163753 | 2 | 401.24  | -17.52 |

|                                               |    |                                         |                                     |     |    |    |        |                                                                                                                                                         |         |         |        |   |         |        |
|-----------------------------------------------|----|-----------------------------------------|-------------------------------------|-----|----|----|--------|---------------------------------------------------------------------------------------------------------------------------------------------------------|---------|---------|--------|---|---------|--------|
| P0A1H5 EFTU_SALTY Elongation factor Tu        | 13 |                                         | MVVTLIHPIAMDDGLR                    | 358 | 16 | 3  | 25.31  | y7y8y10                                                                                                                                                 | 1780.96 | 55.979  | 36056  | 3 | 594.32  | 7.81   |
| P0A1H5 EFTU_SALTY Elongation factor Tu        | 14 | Carbamidomethyl+C(7)                    | HYAHVDCPGHADYVK                     | 75  | 15 | 4  | 29.09  | b8y3y8y10                                                                                                                                               | 1768.76 | 39.788  | 35425  | 4 | 442.94  | -17.53 |
| P0A1H5 EFTU_SALTY Elongation factor Tu        | 15 |                                         | LLDEGR                              | 264 | 6  | 4  | 39.73  | y3°y3y4y5                                                                                                                                               | 702.37  | 26.487  | 13453  | 1 | 702.37  | -9.04  |
| P0A1H5 EFTU_SALTY Elongation factor Tu        | 16 |                                         | GYRPQFYFR                           | 325 | 9  | 3  | 30.18  | b7y5y7                                                                                                                                                  | 1233.60 | 122.929 | 2256   | 1 | 1233.60 | -12.67 |
| P0A1H5 EFTU_SALTY Elongation factor Tu        | 17 | Oxidation+M(23)                         | NMITGAAQMDGAILVVAATDGP MPQTREHILLGR | 90  | 34 | 3  | 16.68  | b4b8b13                                                                                                                                                 | 3563.80 | 90.216  | 8507   | 3 | 1188.61 | -3.43  |
| P0A1H5 EFTU_SALTY Elongation factor Tu        | 18 | Oxidation+M()                           | TTDVTGTIELPEGVEMVMPGDNI K           | 334 | 24 | 5  | 39.26  | b3b15y8y9y10                                                                                                                                            | 2562.24 | 79.268  | 2646   | 2 | 1281.63 | 4.38   |
| P0A1H5 EFTU_SALTY Elongation factor Tu        | 19 |                                         | TGTIELPEGVEMVMPGDNIK                | 338 | 20 | 5  | 28.05  | b5°b5b10b11b15                                                                                                                                          | 2130.03 | 86.535  | 16431  | 2 | 1065.52 | -5.62  |
| P0A1H5 EFTU_SALTY Elongation factor Tu        | 20 |                                         | TINTSHVEYDTPTR                      | 61  | 14 | 2  | 14.24  | b4b7                                                                                                                                                    | 1633.79 | 49.553  | 10905  | 2 | 817.40  | 3.14   |
| P0A1H5 EFTU_SALTY Elongation factor Tu        | 21 |                                         | TTDVTGTIELPEGVEMVMPGD               | 334 | 21 | 0  | 7.88   |                                                                                                                                                         | 2191.01 | 86.546  | 5796   | 2 | 1096.01 | -2.45  |
| P0A1H5 EFTU_SALTY Elongation factor Tu        | 22 |                                         | IELAGFLDSYIPEPER                    | 189 | 16 | 0  | 4.98   |                                                                                                                                                         | 1848.94 | 101.790 | 2844   | 2 | 924.98  | 3.24   |
| P0A1H5 EFTU_SALTY Elongation factor Tu        | 23 |                                         | VDDEELLELVEMEVR                     | 140 | 15 | 0  | 5.39   |                                                                                                                                                         | 1817.89 | 106.043 | 1963   | 2 | 909.45  | 4.83   |
| P0A1H5 EFTU_SALTY Elongation factor Tu        | 24 |                                         | GITINTSHVEYDTPTR                    | 59  | 16 | 0  | 4.56   |                                                                                                                                                         | 1785.86 | 49.577  | 17010  | 3 | 595.96  | -4.58  |
| P0A1S2 HNS_SALTY DNA-binding protein H-NS     | 1  |                                         | EMLIADGIDPNELLNSMAAAK               | 62  | 21 | 53 | 375.9  | b2°b2b3°b3b4°b4b5°b5b6°b6b7°b7b8°b8b9b10b12°b12b13°b13b14°b14b15b16b18b21y1y2y3y4y5y6°y6y7*y7y8*y8y9y10y12°y12*y12y13°y13y14y15y16°y16y17°y17*y17y18y21 | 2216.10 | 96.762  | 623111 | 2 | 1108.56 | 4.52   |
| P0A1S2 HNS_SALTY DNA-binding protein H-NS     | 2  |                                         | YSYVDENGETK                         | 96  | 11 | 10 | 86.44  | b3°b3y2y4y6y7y8y9y10y11                                                                                                                                 | 1304.56 | 32.652  | 100186 | 2 | 652.78  | -5.15  |
| P0A1S2 HNS_SALTY DNA-binding protein H-NS     | 3  | Carbamidomethyl+C(2)                    | ECTLETLEEMLEK                       | 19  | 13 | 9  | 29.3   | b2b3°b3b7y1y5y9°y9y13                                                                                                                                   | 1624.75 | 92.933  | 88087  | 2 | 812.88  | 6.09   |
| P0A1S2 HNS_SALTY DNA-binding protein H-NS     | 4  |                                         | EEESAAAAEVEER                       | 41  | 13 | 4  | 27.86  | y3°y3y8y9                                                                                                                                               | 1419.63 | 34.507  | 15973  | 2 | 710.32  | 5.25   |
| P0A1S2 HNS_SALTY DNA-binding protein H-NS     | 5  |                                         | MSEALK                              | 0   | 6  | 1  | 13.52  | y5                                                                                                                                                      | 678.35  | 29.268  | 5704   | 1 | 678.35  | 5.85   |
| P0A1S2 HNS_SALTY DNA-binding protein H-NS     | 6  |                                         | YSYVDENGETKKTWTGQGR                 | 96  | 18 | 10 | 77.63  | b3°b3y4y6y8y14y15y16y17*y17                                                                                                                             | 2090.92 | 46.860  | 228021 | 3 | 697.65  | -8.52  |
| P0A1S2 HNS_SALTY DNA-binding protein H-NS     | 7  | Carbamidomethyl+C(2)                    | ECTLETLEEMLEKLEVVNER                | 19  | 21 | 7  | 38.19  | b11y3y4*y4y5y7°y7                                                                                                                                       | 2563.27 | 128.028 | 4056   | 3 | 855.09  | 1.71   |
| P0A1S2 HNS_SALTY DNA-binding protein H-NS     | 8  | Carbamidomethyl+C(6); Phosphoryl.STY(7) | AQARECTLETLEEMLEK                   | 15  | 17 | 6  | 25.82  | b5°b5y3y5y11°y11                                                                                                                                        | 2130.95 | 69.667  | 2058   | 4 | 533.49  | 6.07   |
| P0A1S2 HNS_SALTY DNA-binding protein H-NS     | 9  | Oxidation+M(2)                          | EMLIADGIDPNELLNSMAAAK               | 62  | 21 | 4  | 13.7   | b12°b12y5y12                                                                                                                                            | 2232.10 | 91.283  | 32611  | 2 | 1116.55 | 5.47   |
| P0A1S2 HNS_SALTY DNA-binding protein H-NS     | 10 | Carbamidomethyl+C(6); Oxidation+M(14)   | AQARECTLETLEEMLEK                   | 15  | 17 | 6  | 44.52  | b10b12b13y7y9y10                                                                                                                                        | 2066.98 | 84.427  | 32123  | 3 | 689.67  | 3.90   |
| P0A299 RL7_SALTY 50S ribosomal protein L7/L12 | 1  |                                         | DQHIEAVSAMSVMDEVVELISAMEE K         | 5   | 25 | 29 | 201.85 | b2°b2*b2b3b4b5°b5b6b7b8b9°b9°b9b10b11b13y2°y2y4y5°y5y6°y6y7y8y9y10y12y25                                                                                | 2737.32 | 137.136 | 81491  | 3 | 913.11  | -4.55  |
| P0A299 RL7_SALTY 50S ribosomal protein L7/L12 | 2  |                                         | EAKDLVESAPAALKEGVSK                 | 82  | 19 | 6  | 23.92  | b5b8°b8b9°b9y19                                                                                                                                         | 1942.05 | 54.981  | 55876  | 3 | 648.02  | 1.01   |

|                                                           |    |                                             |                                |     |    |    |        |                                                                                                                                      |         |         |        |   |         |        |
|-----------------------------------------------------------|----|---------------------------------------------|--------------------------------|-----|----|----|--------|--------------------------------------------------------------------------------------------------------------------------------------|---------|---------|--------|---|---------|--------|
| [P0A299]RL7_SALTY 50S ribosomal protein L7/L12            | 3  |                                             | DLVESAPAALKEGVSKDDAEALK        | 85  | 23 | 3  | 21.93  | b3b4y7                                                                                                                               | 2356.21 | 68.293  | 6001   | 3 | 786.07  | -6.11  |
| [P0A299]RL7_SALTY 50S ribosomal protein L7/L12            | 4  |                                             | VAVIK                          | 66  | 5  | 2  | 26.21  | b3y4                                                                                                                                 | 529.37  | 26.075  | 3509   | 1 | 529.37  | -4.73  |
| [P0A299]RL7_SALTY 50S ribosomal protein L7/L12            | 5  |                                             | FGVSAAAVAVAAAGPAEAAEEK         | 30  | 22 | 7  | 35.88  | b10b14b15y7y10y16°y16                                                                                                                | 1987.01 | 70.499  | 1511   | 2 | 994.01  | -1.11  |
| [P0A299]RL7_SALTY 50S ribosomal protein L7/L12            | 6  | Phosphoryl STY(5)                           | DLVESAPAALKEGVSK               | 85  | 16 | 3  | 16.93  | b4b13y13                                                                                                                             | 1693.83 | 101.880 | 1874   | 2 | 847.42  | 1.66   |
| [P0A299]RL7_SALTY 50S ribosomal protein L7/L12            | 7  | Oxidation+M(26)                             | SITKQIIEAVSAMSVM DVVELISA MEEK | 1   | 29 | 4  | 21.93  | b11y11y13y14                                                                                                                         | 3182.60 | 102.110 | 30185  | 3 | 1061.54 | 2.38   |
| [P0A1P0]G3P1_SALTY Glyceraldehyde-3-phohate dehydrogenase | 1  |                                             | VINDNFGIIEGLMTTVHATTATQK       | 160 | 24 | 46 | 312.29 | b2b3b4*b4b5°b5*b5b6°b6*b6b8*b8y1y3y4y5y6y7°y7*y7y8°y8y9*y9y10*y10y11y12*y12y13y14°y14y15*y15y16°y16*y16y17y18y19y20y21y22*y22y24*y24 | 2574.32 | 97.990  | 666722 | 3 | 858.78  | -2.94  |
| [P0A1P0]G3P1_SALTY Glyceraldehyde-3-phohate dehydrogenase | 2  |                                             | AGIALNDNFVK                    | 296 | 11 | 15 | 114.42 | b1b3b4b5y1y2y3y4y5y6y7*y7y8y11*y11                                                                                                   | 1161.62 | 61.351  | 417390 | 2 | 581.31  | -4.41  |
| [P0A1P0]G3P1_SALTY Glyceraldehyde-3-phohate dehydrogenase | 3  |                                             | GASQNIIPSSTGAAK                | 198 | 15 | 25 | 171.39 | b5°b5*b5b6°b6*b6b7°b7*b7b14b15y1y2y3y4y5y6y7y8y9y10y11y13°y13y15                                                                     | 1401.73 | 40.618  | 298435 | 2 | 701.37  | -5.66  |
| [P0A1P0]G3P1_SALTY Glyceraldehyde-3-phohate dehydrogenase | 4  |                                             | LVSWYDNETGYSNK                 | 307 | 14 | 14 | 145.56 | b5b8b11y2y3y4y5y6y8y9y10y11y12y14                                                                                                    | 1675.77 | 58.184  | 251404 | 2 | 838.39  | 3.35   |
| [P0A1P0]G3P1_SALTY Glyceraldehyde-3-phohate dehydrogenase | 5  |                                             | VPTPNVSVVDLTVR                 | 232 | 14 | 12 | 99.43  | b3°b3b8y2y4y5y6y7y8y11y12y14                                                                                                         | 1495.85 | 70.924  | 127670 | 2 | 748.43  | -0.73  |
| [P0A1P0]G3P1_SALTY Glyceraldehyde-3-phohate dehydrogenase | 6  |                                             | VVLTGPSKDNTPMFVK               | 116 | 16 | 6  | 56.87  | y3y5y8y11y14y16                                                                                                                      | 1732.90 | 57.654  | 77433  | 3 | 578.31  | -14.79 |
| [P0A1P0]G3P1_SALTY Glyceraldehyde-3-phohate dehydrogenase | 7  |                                             | VLPELNGK                       | 217 | 8  | 12 | 66.77  | b2y2y3*y3y4*y4y5°y5y6*y6y7y8                                                                                                         | 869.50  | 44.616  | 53718  | 2 | 435.25  | -11.86 |
| [P0A1P0]G3P1_SALTY Glyceraldehyde-3-phohate dehydrogenase | 8  |                                             | AATYEQIK                       | 249 | 8  | 4  | 47.64  | b3b4y5y6                                                                                                                             | 923.47  | 30.816  | 164291 | 2 | 462.24  | -15.27 |
| [P0A1P0]G3P1_SALTY Glyceraldehyde-3-phohate dehydrogenase | 9  |                                             | LTGMAFR                        | 225 | 7  | 3  | 37.13  | b6y5y6                                                                                                                               | 795.41  | 49.306  | 73868  | 2 | 398.21  | -16.27 |
| [P0A1P0]G3P1_SALTY Glyceraldehyde-3-phohate dehydrogenase | 10 | Carbamidomethyl+C(20)                       | GVLGYTEDDVVSTDFNGEVCTSV FDAK   | 269 | 27 | 4  | 21.8   | b12y12*y12y13                                                                                                                        | 2924.37 | 136.513 | 9768   | 2 | 1462.69 | 17.95  |
| [P0A1P0]G3P1_SALTY Glyceraldehyde-3-phohate dehydrogenase | 11 |                                             | SDIEIVAINDLLAEY MAYMLK         | 24  | 22 | 8  | 53.43  | b5b6b7b8°b8y6y9°y9                                                                                                                   | 2530.25 | 136.308 | 5298   | 3 | 844.09  | 0.10   |
| [P0A1P0]G3P1_SALTY Glyceraldehyde-3-phohate dehydrogenase | 12 | Carbamidomethyl+C(18);Carbamidomethyl+C(22) | GANFDKYEGQDIVSNASCTTNCL APLAK  | 132 | 28 | 41 | 314.28 | b3b4b5*b5b7b8*b8b10b11°b11*b11b12°b12b13°b13b16b20b23°b23b24°b24b26b27y3y4y5y6y8y9*y9y10y11y12*y12y13°y13y14*y14y15*y15y16           | 3044.40 | 66.762  | 393569 | 3 | 1015.47 | -1.76  |
| [P0A1P0]G3P1_SALTY Glyceraldehyde-3-phohate dehydrogenase | 13 |                                             | GGRGASQNIIPSSTGAAK             | 195 | 18 | 3  | 22.78  | b8b9y8                                                                                                                               | 1671.85 | 36.627  | 11393  | 3 | 557.96  | -13.95 |

|                                                           |    |                       |                                      |     |    |    |        |                                                                                             |         |         |        |   |         |        |
|-----------------------------------------------------------|----|-----------------------|--------------------------------------|-----|----|----|--------|---------------------------------------------------------------------------------------------|---------|---------|--------|---|---------|--------|
| P0A1P0 G3P1_SALTY Glyceraldehyde-3-phohate dehydrogenase  | 14 |                       | AGIALNDNFVKLVSWYDNETGYS<br>NK        | 296 | 25 | 3  | 22.76  | y4y5y12                                                                                     | 2818.37 | 103.429 | 4566   | 3 | 940.13  | 2.25   |
| P0A1P0 G3P1_SALTY Glyceraldehyde-3-phohate dehydrogenase  | 15 |                       | VINDNFGIIEGLMTTVHATTATQK<br>TVDGPSHK | 160 | 32 | 5  | 11.08  | b5y3°y3y10*y10                                                                              | 3395.68 | 78.790  | 4524   | 4 | 849.68  | -13.01 |
| P0A1P0 G3P1_SALTY Glyceraldehyde-3-phohate dehydrogenase  | 16 |                       | TVDGPSHKDWR                          | 184 | 11 | 4  | 50.14  | b4b5b7b9                                                                                    | 1297.62 | 76.353  | 1895   | 2 | 649.31  | -8.00  |
| Q7CQ05 GRCA_SALTY Autonomous glycy1 radical cofactor      | 1  |                       | SGFAEDEVVAVSK                        | 35  | 13 | 14 | 116.59 | b2b3b4b12y1y2y3y4y7y8y<br>9y10y11y13                                                        | 1337.66 | 54.248  | 229659 | 2 | 669.33  | -2.01  |
| Q7CQ05 GRCA_SALTY Autonomous glycy1 radical cofactor      | 2  |                       | MITGIQITK                            | 0   | 9  | 9  | 57.09  | b1b2y2y3y4*y4y6y7y9                                                                         | 1004.57 | 54.952  | 196977 | 2 | 502.79  | -9.11  |
| Q7CQ05 GRCA_SALTY Autonomous glycy1 radical cofactor      | 3  |                       | LGEIEYR                              | 48  | 7  | 10 | 63.35  | b3y1y2y3y4y5°y5y6°y6y7                                                                      | 879.45  | 42.083  | 186998 | 2 | 440.23  | -11.87 |
| Q7CQ05 GRCA_SALTY Autonomous glycy1 radical cofactor      | 4  |                       | EIPMEVKPEVR                          | 55  | 11 | 10 | 70.33  | b4°b4y2y4°y4y5y6y8y9y11                                                                     | 1326.70 | 48.768  | 107134 | 2 | 663.86  | -2.85  |
| Q7CQ05 GRCA_SALTY Autonomous glycy1 radical cofactor      | 5  |                       | FNSLTPEQQR                           | 106 | 10 | 23 | 99.93  | b2*b2b3°b3*b3b10°b10y2<br>y3*y3y4y5*y5y6°y6y7y8°y<br>8*y8y9°y9*y9y10                        | 1219.60 | 37.845  | 106708 | 2 | 610.30  | -8.01  |
| Q7CQ05 GRCA_SALTY Autonomous glycy1 radical cofactor      | 6  |                       | FNSLTPEQQRDVIAR                      | 106 | 15 | 13 | 62.54  | b2*b2b3°b3b5y1y3y4y6y1<br>0*y10y13y15                                                       | 1773.90 | 47.444  | 87718  | 3 | 591.97  | -11.63 |
| Q7CQ05 GRCA_SALTY Autonomous glycy1 radical cofactor      | 7  |                       | VEGGQHLNVNVLR                        | 66  | 13 | 4  | 31.94  | b5y4y6y7                                                                                    | 1434.76 | 50.418  | 112927 | 3 | 478.92  | -15.91 |
| Q7CQ05 GRCA_SALTY Autonomous glycy1 radical cofactor      | 8  |                       | TFTESL                               | 121 | 6  | 7  | 65.94  | b3b4°b4b5°b5y3y4                                                                            | 697.34  | 55.164  | 82026  | 1 | 697.34  | -1.23  |
| Q7CQ05 GRCA_SALTY Autonomous glycy1 radical cofactor      | 9  |                       | AANDDLLNSFWLLDSEKGEAR                | 9   | 21 | 29 | 254.94 | b3b4b5°b5*b5b6°b6*b6b7°<br>b7*b7y4y5y7y8y9°y9y10°y<br>10y11°y11y12y13y14y15y1<br>6y17y18y19 | 2364.14 | 92.745  | 512624 | 3 | 788.72  | -3.30  |
| Q7CQ05 GRCA_SALTY Autonomous glycy1 radical cofactor      | 10 |                       | SGFAEDEVVAVSKLGEIEYR                 | 35  | 20 | 5  | 14.19  | b14y5°y5y7°y7                                                                               | 2198.11 | 115.616 | 27385  | 3 | 733.38  | 6.22   |
| Q7CQ05 GRCA_SALTY Autonomous glycy1 radical cofactor      | 11 |                       | PMEVKPEVR                            | 57  | 9  | 4  | 50.14  | b3b4b7b8                                                                                    | 1084.58 | 48.768  | 105219 | 2 | 542.79  | -5.52  |
| Q7CQ05 GRCA_SALTY Autonomous glycy1 radical cofactor      | 12 |                       | EIPMEVKPEVR                          | 55  | 11 | 0  | 2.49   |                                                                                             | 1308.68 | 48.782  | 42436  | 3 | 436.90  | -11.29 |
| Q7CQ05 GRCA_SALTY Autonomous glycy1 radical cofactor      | 13 |                       | MITGIQITK                            | 0   | 9  | 0  | 1.66   |                                                                                             | 986.55  | 54.911  | 2540   | 2 | 493.78  | -14.60 |
| P0A251 AHPC_SALTY Alkyl hydroperoxide reductase subunit C | 1  |                       | YAMIGDPTGALTR                        | 93  | 13 | 13 | 119.6  | b2b3b4b6y1y3y5y7y8y9y1<br>0y11y13                                                           | 1365.68 | 63.010  | 87392  | 2 | 683.35  | 0.98   |
| P0A251 AHPC_SALTY Alkyl hydroperoxide reductase subunit C | 2  | Carbamidomethyl+C(13) | AAQYVAAHPEGVCPAK                     | 153 | 16 | 10 | 84.22  | b4y2y3y4y5y8y9y11y12y1<br>6                                                                 | 1668.79 | 35.169  | 79648  | 3 | 556.94  | -14.34 |
| P0A251 AHPC_SALTY Alkyl hydroperoxide reductase subunit C | 3  |                       | ATFVVDPPQGIQAEIVTAEGIGR              | 120 | 23 | 13 | 117.61 | b2b3°b3b4b5b8y4y5y6y7y<br>8y9y10                                                            | 2384.28 | 129.008 | 55269  | 3 | 795.43  | -0.82  |
| P0A251 AHPC_SALTY Alkyl hydroperoxide reductase subunit C | 4  |                       | ATFVVDPPQGIQAEIVTAEGIGRDA<br>SDLLR   | 120 | 30 | 5  | 21.77  | b8b9°b9b13y7                                                                                | 3154.67 | 137.206 | 3473   | 3 | 1052.23 | -1.78  |
| P0A251 AHPC_SALTY Alkyl hydroperoxide reductase subunit C | 5  |                       | LGVDVYSVSTDTHFTHK                    | 63  | 17 | 4  | 29.58  | b13b14y11y13                                                                                | 1905.95 | 66.594  | 2132   | 2 | 953.48  | 6.02   |
| P0A251 AHPC_SALTY Alkyl hydroperoxide reductase subunit C | 6  | Carbamidomethyl+C(15) | WSVFFFPADFTFVCPTELGDVA<br>DHYEELQK   | 32  | 31 | 3  | 22.68  | b3b8b9                                                                                      | 3757.74 | 120.054 | 12021  | 3 | 1253.25 | 4.22   |
| P0A251 AHPC_SALTY Alkyl hydroperoxide reductase subunit C | 7  | Carbamidomethyl+C(13) | AAQYVAAHPEGVCPAKWK                   | 153 | 18 | 3  | 22.78  | b11b12y11                                                                                   | 1982.98 | 72.081  | 4227   | 4 | 496.50  | -6.46  |
| P0A251 AHPC_SALTY Alkyl hydroperoxide reductase subunit C | 8  | Phosphoryl STY()      | LGVDVYSVSTDTHFTHK                    | 63  | 17 | 3  | 23.09  | b7b8y7                                                                                      | 1985.86 | 88.982  | 14932  | 3 | 662.63  | -13.89 |
| P0A251 AHPC_SALTY Alkyl hydroperoxide reductase subunit C | 9  | Carbamidomethyl+C(11) | QYVAAHPEGVCPAK                       | 155 | 14 | 1  | 7.25   | b6                                                                                          | 1526.72 | 35.215  | 2519   | 3 | 509.58  | -12.71 |

|                                                           |    |                       |                               |     |    |    |        |                                                                                |         |         |         |   |        |        |
|-----------------------------------------------------------|----|-----------------------|-------------------------------|-----|----|----|--------|--------------------------------------------------------------------------------|---------|---------|---------|---|--------|--------|
| P0A251 AHPC_SALTY Alkyl hydroperoxide reductase subunit C | 10 | Carbamidomethyl+C(10) | YVAAHPGEVCPAK                 | 156 | 13 | 2  | 14.24  | b3b5                                                                           | 1398.69 | 35.188  | 2085    | 2 | 699.85 | 3.05   |
| P0A1R6 DBHA_SALTY DNA-binding protein HU-alpha            | 1  |                       | IAAANVPAFVSGK                 | 70  | 13 | 24 | 189.1  | b2b3b4b5*b5b6*b6b11y1y2y3y4y5y6y7*y7y8y9y10*y10y11*y11y12y13                   | 1244.69 | 59.386  | 1068927 | 2 | 622.85 | -6.67  |
| P0A1R6 DBHA_SALTY DNA-binding protein HU-alpha            | 2  |                       | AALESTLAAITESLKEGDAVQLVGFGTFK | 22  | 29 | 4  | 11.44  | b4°b4b6y13                                                                     | 2966.55 | 116.034 | 38477   | 4 | 742.39 | -8.39  |
| P0A1R6 DBHA_SALTY DNA-binding protein HU-alpha            | 3  |                       | TQLIDVIADK                    | 3   | 10 | 4  | 26.62  | b2b3b5y6                                                                       | 1115.62 | 65.957  | 10061   | 2 | 558.31 | -11.93 |
| P0A1R6 DBHA_SALTY DNA-binding protein HU-alpha            | 4  |                       | EGDAVQLVGFGTfK                | 37  | 14 | 7  | 39.35  | b6b9b13y6°y6y13*y13                                                            | 1467.72 | 64.678  | 28787   | 2 | 734.36 | -19.21 |
| P0AA28 THIO_SALTY Thioredoxin-1                           | 1  |                       | LNIDQNPGTAPK                  | 58  | 12 | 29 | 181.61 | b2*b2b3*b3b4°b4*b4b6°b6*b6b7b10y2y3y4y5y6y7y8°y8*y8y9°y9*y9y10°y10y11*y11y12   | 1267.66 | 38.289  | 233799  | 2 | 634.33 | -4.53  |
| P0AA28 THIO_SALTY Thioredoxin-1                           | 2  |                       | MIAPILDEIADEYQGK              | 37  | 16 | 23 | 169.46 | b2b3b4b12°b12y1y2y3*y3y4*y4y5°y5y6y7y8*y8y10y11y13y14y15y16                    | 1805.91 | 93.608  | 155158  | 2 | 903.46 | 5.20   |
| P0AA28 THIO_SALTY Thioredoxin-1                           | 3  |                       | GIPTLLLFK                     | 74  | 9  | 10 | 74.27  | b2b3y1y2y3y4y5y6y7y9                                                           | 1001.63 | 91.160  | 98656   | 2 | 501.32 | -8.77  |
| P0AA28 THIO_SALTY Thioredoxin-1                           | 4  |                       | GQLKEFLDANLA                  | 97  | 12 | 4  | 31.8   | b6b8y4y10                                                                      | 1318.70 | 77.037  | 19939   | 2 | 659.85 | 0.19   |
| P0AA28 THIO_SALTY Thioredoxin-1                           | 5  |                       | EFLDANLA                      | 101 | 8  | 5  | 35.79  | b6y3*y3y6y8                                                                    | 892.43  | 113.131 | 1512    | 1 | 892.43 | -10.53 |
| P0AA28 THIO_SALTY Thioredoxin-1                           | 6  |                       | MIAPILDEIADEYQGKLTVAK         | 37  | 21 | 11 | 111.55 | b3b4y4y5y7y11y12y14y16y18y19                                                   | 2318.22 | 94.780  | 169879  | 3 | 773.41 | -2.84  |
| P0AA28 THIO_SALTY Thioredoxin-1                           | 7  |                       | PTLLLFK                       | 76  | 7  | 2  | 23.1   | b3b4                                                                           | 831.52  | 91.158  | 99935   | 2 | 416.26 | -14.39 |
| P0A7W4 RS5_SALTY 30S ribosomal protein S5                 | 1  |                       | VFMQPASEGTGIIAGGAMR           | 93  | 19 | 28 | 286.44 | b2b3b4b6b10b11b12b13b14°b14*b14b15b17y4y5y6y7y9y10y11y12y13y14y15°y15y16y17y19 | 1892.94 | 68.031  | 352243  | 2 | 946.97 | 3.42   |
| P0A7W4 RS5_SALTY 30S ribosomal protein S5                 | 2  |                       | AVLEVAGVHNVLAK                | 112 | 14 | 12 | 107.88 | b2b3b4y2y3y6y8y9y10y11y12y14                                                   | 1419.83 | 60.985  | 232086  | 2 | 710.42 | -1.29  |
| P0A7W4 RS5_SALTY 30S ribosomal protein S5                 | 3  |                       | AYGSTNPINVVR                  | 126 | 12 | 16 | 112.4  | b1b2b3y2y3y4*y4y6y7y8y9y10*y10y11y12*y12                                       | 1290.67 | 51.102  | 200381  | 2 | 645.84 | -8.13  |
| P0A7W4 RS5_SALTY 30S ribosomal protein S5                 | 4  |                       | ATIDGLENMNSPEMVAAK            | 138 | 18 | 27 | 201.16 | b2b5°b5b8b11°b11b15°b15°b15b16y2y3y4y5y6°y6y7y8y10y11y12*y12y13y14y15y18*y18   | 1890.90 | 63.150  | 125656  | 2 | 945.95 | 2.97   |
| P0A7W4 RS5_SALTY 30S ribosomal protein S5                 | 5  |                       | ATIDGLENMNSPEMVAAKR           | 138 | 19 | 17 | 156.93 | b2b4y1y3y4y5y6y8y9°y9y10y11°y11y12y13y16y17                                    | 2046.98 | 58.945  | 104021  | 3 | 683.00 | -5.49  |
| P0A7W4 RS5_SALTY 30S ribosomal protein S5                 | 6  |                       | EVPAAIQK                      | 54  | 8  | 4  | 40.56  | y3y4y6y8                                                                       | 855.48  | 29.654  | 39831   | 2 | 428.25 | -10.84 |
| P0A7W4 RS5_SALTY 30S ribosomal protein S5                 | 7  |                       | VGFGYGK                       | 45  | 7  | 6  | 40.15  | b1b2b6y4y6y7                                                                   | 727.37  | 39.806  | 31839   | 2 | 364.19 | -13.76 |
| P0A7W4 RS5_SALTY 30S ribosomal protein S5                 | 8  |                       | IFSFTALTTVGDGNR               | 29  | 16 | 5  | 37.42  | b4b6b13b14y14                                                                  | 1653.83 | 100.657 | 3184    | 2 | 827.42 | -15.87 |
| P0A7W4 RS5_SALTY 30S ribosomal protein S5                 | 9  |                       | NMINVALNNGTLQHPPKGVHTGSR      | 69  | 24 | 5  | 39.83  | b5b6b8b9y15                                                                    | 2557.36 | 109.013 | 2651    | 3 | 853.12 | 5.82   |
| P0A7W4 RS5_SALTY 30S ribosomal protein S5                 | 10 |                       | EVPAAIQKAMEK                  | 54  | 12 | 3  | 22.01  | b5y3y5                                                                         | 1314.71 | 81.546  | 1755    | 2 | 657.86 | -0.84  |

|                                             |    |                       |                                   |     |    |    |        |                                                         |         |        |        |   |         |        |
|---------------------------------------------|----|-----------------------|-----------------------------------|-----|----|----|--------|---------------------------------------------------------|---------|--------|--------|---|---------|--------|
| P0A7W4 RS5_SALTY 30S ribosomal protein S5   | 11 | Oxidation+M()         | ATIDGLENMNSPEMVAAK                | 138 | 18 | 3  | 15.37  | b4y4y12                                                 | 1906.91 | 53.981 | 1644   | 2 | 953.96  | 9.92   |
| P0A7W4 RS5_SALTY 30S ribosomal protein S5   | 12 |                       | LEVAGVHNVLAK                      | 114 | 12 | 2  | 20.91  | b8b9                                                    | 1249.72 | 60.949 | 41581  | 2 | 625.36  | -6.74  |
| P0A7W4 RS5_SALTY 30S ribosomal protein S5   | 13 |                       | EVPAAIQK                          | 54  | 8  | 0  | 1.24   |                                                         | 837.47  | 29.689 | 15438  | 2 | 419.24  | -11.73 |
| P0A1Z2 SKP_SALTY Chaperone protein skp      | 1  |                       | IAIVNMGNLFQQVAQK                  | 23  | 16 | 18 | 111.7  | b2b3b4b8b15y1y2y3y4y5*y5y7y10*y10y11y12*y12y16          | 1773.97 | 90.024 | 73664  | 2 | 887.49  | 1.65   |
| P0A1Z2 SKP_SALTY Chaperone protein skp      | 2  |                       | TGVSNTLENEFK                      | 39  | 12 | 8  | 86.86  | b9b10y3y5y7y8y11y12                                     | 1338.66 | 57.993 | 62046  | 2 | 669.83  | 2.83   |
| P0A1Z2 SKP_SALTY Chaperone protein skp      | 3  |                       | VANDQSIDLVDANTVAYNSSDV KDITADV LK | 126 | 32 | 11 | 39.73  | b3b7*b7b8b10*b10*b10b13b15y12y16                        | 3392.71 | 89.864 | 42331  | 3 | 1131.58 | 1.51   |
| P0A1Z2 SKP_SALTY Chaperone protein skp      | 4  |                       | AQAFEKDR                          | 97  | 8  | 9  | 53.67  | b2*b2y2y3y4*y4y5y6y8                                    | 964.48  | 17.067 | 6791   | 2 | 482.74  | -9.94  |
| P0A1Z2 SKP_SALTY Chaperone protein skp      | 5  |                       | TGVSNTLENEFKGR                    | 39  | 14 | 6  | 41.94  | b6y6y8y9y11*y11                                         | 1551.75 | 54.139 | 142103 | 3 | 517.92  | -14.16 |
| P0A1Z2 SKP_SALTY Chaperone protein skp      | 6  |                       | KWLLAAGLGLAMV TSAQAADK            | 2   | 21 | 4  | 23.35  | y4y9*y9y10                                              | 2115.14 | 80.638 | 2595   | 3 | 705.72  | -12.81 |
| P0A1Z2 SKP_SALTY Chaperone protein skp      | 7  | Oxidation+M(11)       | WLLAAGLGLAMV TSAQAADK             | 3   | 20 | 5  | 37.44  | y3*y3y7y8y9                                             | 2003.07 | 81.628 | 3505   | 2 | 1002.04 | 2.80   |
| P0A1Z2 SKP_SALTY Chaperone protein skp      | 8  |                       | AYNSSDVKDITADV LK                 | 142 | 16 | 1  | 9.99   | b3                                                      | 1738.87 | 89.922 | 2058   | 2 | 869.94  | -7.58  |
| O54296 RS11_SALTY 30S ribosomal protein S11 | 1  |                       | STPFAAQVAAER                      | 57  | 12 | 9  | 63.66  | b1y1y4y6y7y8y10*y10y12                                  | 1247.64 | 49.489 | 65064  | 2 | 624.32  | 1.37   |
| O54296 RS11_SALTY 30S ribosomal protein S11 | 2  |                       | QGNALGWATAGGSGFR                  | 37  | 16 | 14 | 138.31 | b7b16y1y3y5y6y7y8y9y10y11y12y14y16                      | 1549.75 | 66.032 | 59890  | 2 | 775.38  | 1.34   |
| O54296 RS11_SALTY 30S ribosomal protein S11 | 3  |                       | ALNAAGFR                          | 98  | 8  | 5  | 40.56  | y2y4y5y6y8                                              | 819.44  | 41.991 | 42150  | 2 | 410.22  | -9.83  |
| O54296 RS11_SALTY 30S ribosomal protein S11 | 4  |                       | QVSDGVAHIHASFNNTIVTITDR           | 14  | 23 | 5  | 39.68  | y3y4y10y11*y11                                          | 2495.26 | 83.779 | 8123   | 3 | 832.43  | 0.49   |
| O54296 RS11_SALTY 30S ribosomal protein S11 | 5  | Carbamidomethyl+C(1)  | CADAVK                            | 69  | 6  | 2  | 29.64  | y3y5                                                    | 663.32  | 66.143 | 3336   | 1 | 663.32  | 10.77  |
| O54296 RS11_SALTY 30S ribosomal protein S11 | 6  | Carbamidomethyl+C(13) | STPFAAQVAAERCADAVK                | 57  | 18 | 5  | 30.55  | b3b7b15y3y10                                            | 1891.91 | 86.290 | 6628   | 3 | 631.31  | -10.19 |
| O54296 RS11_SALTY 30S ribosomal protein S11 | 7  |                       | QGNALGWATAGGSGFRGSR               | 37  | 19 | 3  | 22.52  | b5y8y9                                                  | 1849.91 | 48.582 | 1583   | 2 | 925.46  | 3.76   |
| O54296 RS11_SALTY 30S ribosomal protein S11 | 8  | Phosphoryl STY(9)     | QGNALGWATAGGSGFR                  | 37  | 16 | 4  | 16.93  | b7y5*y5y8                                               | 1629.72 | 43.332 | 41582  | 3 | 543.91  | 9.06   |
| Q8ZK80 RL9_SALTY 50S ribosomal protein L9   | 1  |                       | LADVLAANAR                        | 57  | 11 | 15 | 113.45 | b2b3b4y1y4*y4y5y6*y6y7*y7y8y9y10y11                     | 1084.60 | 53.269 | 203304 | 2 | 542.81  | -6.42  |
| Q8ZK80 RL9_SALTY 50S ribosomal protein L9   | 2  |                       | VANLGSLGDQVNVK                    | 8   | 14 | 20 | 156.32 | b2b3b4b10*b10b13*b13y3y4y6y7*y7y8y9y10*y10y11y12*y12y14 | 1413.77 | 56.436 | 164478 | 2 | 707.39  | -1.55  |
| Q8ZK80 RL9_SALTY 50S ribosomal protein L9   | 3  |                       | VIINVVAE                          | 141 | 8  | 6  | 40.56  | b1b4b5b6*b6y8                                           | 856.51  | 63.286 | 135160 | 1 | 856.51  | -5.77  |
| Q8ZK80 RL9_SALTY 50S ribosomal protein L9   | 4  |                       | DIADAVTAAGVDVAK                   | 97  | 15 | 13 | 120.52 | b2b3b4b5b6b10y4y6y7y8y9y10y15                           | 1415.74 | 66.007 | 112653 | 2 | 708.37  | 0.95   |
| Q8ZK80 RL9_SALTY 50S ribosomal protein L9   | 5  |                       | NVEYFEAR                          | 42  | 8  | 4  | 40.56  | y2y4y5y6                                                | 1027.48 | 46.777 | 97669  | 2 | 514.24  | -4.99  |
| Q8ZK80 RL9_SALTY 50S ribosomal protein L9   | 6  |                       | INALETVTIASK                      | 71  | 12 | 5  | 39.88  | b4y9y10y11y12                                           | 1259.72 | 61.029 | 68385  | 2 | 630.36  | -2.91  |
| Q8ZK80 RL9_SALTY 50S ribosomal protein L9   | 7  |                       | MQVILLDK                          | 0   | 8  | 3  | 40.56  | y3y4y5                                                  | 959.55  | 64.352 | 114903 | 2 | 480.28  | -10.94 |
| Q8ZK80 RL9_SALTY 50S ribosomal protein L9   | 8  |                       | TTGEHEVNFQVHSEVFAK                | 123 | 18 | 4  | 24.5   | b8b10b12y9                                              | 2059.02 | 66.762 | 2697   | 3 | 687.01  | 14.94  |
| Q8ZK80 RL9_SALTY 50S ribosomal protein L9   | 9  |                       | AGDEGKLFGSIGTR                    | 83  | 14 | 3  | 26.82  | y3y7y8                                                  | 1407.70 | 55.040 | 106626 | 3 | 469.91  | -13.09 |

|                                           |    |                      |                       |     |    |    |        |                                                                      |         |         |        |   |         |        |
|-------------------------------------------|----|----------------------|-----------------------|-----|----|----|--------|----------------------------------------------------------------------|---------|---------|--------|---|---------|--------|
| Q8ZK80 RL9_SALTY 50S ribosomal protein L9 | 10 |                      | RAELEAK               | 50  | 7  | 5  | 50.24  | b3b4b5y5°y5                                                          | 816.45  | 15.794  | 8455   | 2 | 408.73  | -12.86 |
| O54297 RS4_SALTY 30S ribosomal protein S4 | 1  |                      | LSDYGVQLR             | 47  | 9  | 7  | 59.4   | b3b7y2y5y6y8y9                                                       | 1050.55 | 51.060  | 105178 | 2 | 525.78  | -5.81  |
| O54297 RS4_SALTY 30S ribosomal protein S4 | 2  |                      | VVNIASYQVSPNDVVSIR    | 128 | 18 | 26 | 171.06 | b1b3*b3b4b7*b7b8b9°b9*b9b14b17*b17y1y3y4°y4y5y8y9y11*y11y12y13y14y18 | 1960.06 | 72.080  | 96744  | 2 | 980.53  | 3.43   |
| O54297 RS4_SALTY 30S ribosomal protein S4 | 3  |                      | LDNVVYR               | 97  | 7  | 7  | 40.15  | y2y3y5y6°y6y7*y7                                                     | 878.46  | 37.885  | 60637  | 2 | 439.74  | -10.49 |
| O54297 RS4_SALTY 30S ribosomal protein S4 | 4  |                      | VVNIASYQVSPNDVVSIREK  | 128 | 20 | 6  | 24.95  | b1b7°b7y5y10y11                                                      | 2217.18 | 66.040  | 39151  | 3 | 739.73  | -2.64  |
| O54297 RS4_SALTY 30S ribosomal protein S4 | 5  |                      | MGFGATR               | 104 | 7  | 3  | 40.15  | y3y4y5                                                               | 739.35  | 36.121  | 18578  | 2 | 370.18  | -11.06 |
| O54297 RS4_SALTY 30S ribosomal protein S4 | 6  |                      | AALELAEQREKPTWLEVDAGK | 156 | 21 | 3  | 13.7   | b8b10y4                                                              | 2354.25 | 95.492  | 12853  | 3 | 785.42  | 4.56   |
| O54297 RS4_SALTY 30S ribosomal protein S4 | 7  |                      | LSDYGVQLREK           | 47  | 11 | 4  | 27.03  | b7b8y4y11                                                            | 1307.69 | 64.159  | 4413   | 2 | 654.35  | -4.57  |
| O54297 RS4_SALTY 30S ribosomal protein S4 | 8  |                      | IYGVLER               | 63  | 7  | 3  | 37.13  | b3y5y6                                                               | 849.47  | 49.824  | 46883  | 2 | 425.24  | -10.49 |
| O54297 RS4_SALTY 30S ribosomal protein S4 | 9  |                      | KPER                  | 184 | 4  | 1  | 12.69  | y3                                                                   | 529.31  | 45.061  | 28987  | 1 | 529.31  | -7.15  |
| O54297 RS4_SALTY 30S ribosomal protein S4 | 10 |                      | MEGTYK                | 177 | 6  | 1  | 13.52  | y5                                                                   | 728.33  | 42.920  | 10018  | 1 | 728.33  | -2.68  |
| O54297 RS4_SALTY 30S ribosomal protein S4 | 11 |                      | AALELAEQR             | 156 | 9  | 9  | 74.27  | b3y3y4*y4y6*y6y7*y7y8                                                | 1000.54 | 43.198  | 7951   | 1 | 1000.54 | -1.65  |
| O54297 RS4_SALTY 30S ribosomal protein S4 | 12 |                      | IEQAPGQHGAR           | 33  | 11 | 4  | 36.34  | b7y4y6y7                                                             | 1163.57 | 15.540  | 5020   | 3 | 388.53  | -21.40 |
| O54297 RS4_SALTY 30S ribosomal protein S4 | 13 | Carbamidomethyl+C(1) | CKIEQAPGQHGAR         | 31  | 13 | 4  | 38.93  | b9y3y4y5                                                             | 1451.70 | 56.440  | 21726  | 3 | 484.57  | -11.52 |
| O54297 RS4_SALTY 30S ribosomal protein S4 | 14 |                      | IEQAPGQHGARKPR        | 33  | 14 | 3  | 26.82  | b3b7b8                                                               | 1544.82 | 54.317  | 1692   | 3 | 515.61  | -12.25 |
| O54297 RS4_SALTY 30S ribosomal protein S4 | 15 |                      | VVNIASYQVSPN          | 128 | 12 | 0  | 6.22   |                                                                      | 1290.65 | 65.952  | 2165   | 3 | 430.89  | -14.19 |
| O54297 RS4_SALTY 30S ribosomal protein S4 | 16 |                      | LSDYGVQLR             | 47  | 9  | 0  | 1.66   |                                                                      | 1032.55 | 51.157  | 2344   | 3 | 344.86  | 10.40  |
| P0A1E3 CYSK_SALTY Cysteine synthase A     | 1  |                      | IQGIGAGFIPGNLDLK      | 226 | 16 | 20 | 123.83 | b2*b2b3b4b8b9b14y1y2y3y6*y6y7*y7y10y11y12y14°y14y16                  | 1612.91 | 83.520  | 113039 | 2 | 806.96  | 4.09   |
| P0A1E3 CYSK_SALTY Cysteine synthase A     | 2  |                      | LTLTMPETMSIER         | 87  | 13 | 14 | 82.6   | b2°b2b5°b5b8b9°b9y6y8y9y10y11°y11y13                                 | 1521.77 | 73.879  | 102924 | 2 | 761.39  | 0.00   |
| P0A1E3 CYSK_SALTY Cysteine synthase A     | 3  |                      | YLLLQQFSNPANPEIHEK    | 137 | 18 | 10 | 51.88  | b2b3y3y6y9y11°y11*y11y14y18                                          | 2141.10 | 74.173  | 99461  | 3 | 714.37  | -2.85  |
| P0A1E3 CYSK_SALTY Cysteine synthase A     | 4  |                      | NIVVILPSSGER          | 293 | 12 | 10 | 82.09  | b2b3b4y6y7°y7y8y9y10y12                                              | 1283.73 | 63.974  | 42960  | 2 | 642.37  | -2.66  |
| P0A1E3 CYSK_SALTY Cysteine synthase A     | 5  |                      | ALGANLVLTEGAK         | 105 | 13 | 4  | 20.38  | b12y3y5y13                                                           | 1256.72 | 61.147  | 41936  | 2 | 628.86  | -2.33  |
| P0A1E3 CYSK_SALTY Cysteine synthase A     | 6  |                      | LQEDSFNTK             | 283 | 10 | 4  | 36.62  | y6y7y8y10                                                            | 1210.56 | 34.919  | 41253  | 2 | 605.78  | 3.33   |
| P0A1E3 CYSK_SALTY Cysteine synthase A     | 7  |                      | AEEIVASDPQK           | 126 | 11 | 12 | 87.24  | b3b4°b4y1y3y5°y5y6y7y9y11*y11                                        | 1186.59 | 31.220  | 26417  | 2 | 593.80  | -1.95  |
| P0A1E3 CYSK_SALTY Cysteine synthase A     | 8  |                      | VVGITNEEAISTAR        | 246 | 14 | 4  | 27.21  | b3b10y4y10                                                           | 1459.77 | 49.313  | 24330  | 2 | 730.39  | -2.26  |
| P0A1E3 CYSK_SALTY Cysteine synthase A     | 9  |                      | YLSTALFADLFTEK        | 305 | 14 | 4  | 19.04  | b9°b9y5y7                                                            | 1618.84 | 103.561 | 15582  | 2 | 809.92  | 2.94   |
| P0A1E3 CYSK_SALTY Cysteine synthase A     | 10 |                      | LTLTMPETMSIERR        | 87  | 14 | 8  | 19.04  | b2°b2b7°b7b13°b13y11y14                                              | 1677.89 | 96.464  | 10262  | 2 | 839.45  | 12.15  |
| P0A1E3 CYSK_SALTY Cysteine synthase A     | 11 |                      | YLSTALFADLFTEKELQQ    | 305 | 18 | 5  | 24.5   | b5°b5b14b16y6                                                        | 2117.09 | 102.602 | 118287 | 2 | 1059.05 | 4.15   |



|                                                                        |    |                      |                                  |     |    |    |        |                                                               |         |         |        |   |         |        |
|------------------------------------------------------------------------|----|----------------------|----------------------------------|-----|----|----|--------|---------------------------------------------------------------|---------|---------|--------|---|---------|--------|
| P0A1E3 CYSK_SALTY Cysteine synthase A                                  | 12 |                      | AEEIVASDPQKYLLQQFSNPANP<br>EIHEK | 126 | 29 | 8  | 33.81  | b3b6b12y3y9y11y12°y12                                         | 3308.65 | 77.302  | 60609  | 4 | 827.92  | -10.26 |
| P0A1E3 CYSK_SALTY Cysteine synthase A                                  | 13 |                      | GYKLTLTMPETMSIER                 | 84  | 16 | 3  | 23.46  | b11b12y6                                                      | 1869.93 | 77.298  | 40594  | 2 | 935.47  | -8.55  |
| P0A1E3 CYSK_SALTY Cysteine synthase A                                  | 14 |                      | LTLTMPETMSIERR                   | 87  | 14 | 3  | 19.04  | b8b11y11                                                      | 1677.85 | 92.680  | 1731   | 2 | 839.43  | -8.15  |
| P0A1E3 CYSK_SALTY Cysteine synthase A                                  | 15 | Carbamidomethyl+C(8) | NPSFSVKCR                        | 35  | 9  | 5  | 30.18  | b7*b7y4y6°y6                                                  | 1094.53 | 136.343 | 1518   | 1 | 1094.53 | -7.47  |
| P0A2H9 DSBA_SALTY Thiol:disulfide interchange protein dsbA             | 1  |                      | AAADLQLQGVPMFVNGK                | 158 | 18 | 21 | 136.4  | b2b5b7b8b9b10y1y3*y3y4<br>*y4y5*y5y6y8*y8y10y11*<br>y11y12y18 | 1829.96 | 80.643  | 65888  | 2 | 915.48  | 2.33   |
| P0A2H9 DSBA_SALTY Thiol:disulfide interchange protein dsbA             | 2  |                      | YQINPQGMDTSSMDVFFVQQYAD<br>TVK   | 176 | 25 | 14 | 53.44  | b2*b2b4b6y1y4y7*y7y8y9<br>y12y14*y14y25                       | 2865.31 | 86.370  | 24105  | 2 | 1433.16 | 2.64   |
| P0A2H9 DSBA_SALTY Thiol:disulfide interchange protein dsbA             | 3  |                      | TQTVQSAADIR                      | 116 | 11 | 7  | 41.11  | b2b9y2y4y7y9y11                                               | 1189.61 | 35.014  | 22065  | 2 | 595.31  | -2.98  |
| P0A2H9 DSBA_SALTY Thiol:disulfide interchange protein dsbA             | 4  |                      | ELTQAWAVAMALGVEDK                | 88  | 17 | 5  | 25.82  | b5*b5y3y6y11                                                  | 1831.91 | 53.273  | 1790   | 4 | 458.73  | -11.39 |
| P0A2H9 DSBA_SALTY Thiol:disulfide interchange protein dsbA             | 5  | Oxidation+M(10)      | ELTQAWAVAMALGVEDK                | 88  | 17 | 4  | 29.58  | b10b12y6y7                                                    | 1847.93 | 83.504  | 7481   | 2 | 924.47  | 4.76   |
| P0A2H9 DSBA_SALTY Thiol:disulfide interchange protein dsbA             | 6  | Oxidation+M(21)      | YHVEFLGPLGKELTQAWAVAMA<br>LGVEDK | 77  | 28 | 4  | 17.11  | b12y4y9y14                                                    | 3088.56 | 78.707  | 7318   | 4 | 772.90  | -6.24  |
| P0A2H9 DSBA_SALTY Thiol:disulfide interchange protein dsbA             | 7  |                      | NPQGMDTSSMDVFFVQQYADTVK          | 179 | 22 | 0  | 8.3    |                                                               | 2461.13 | 86.311  | 3990   | 3 | 821.05  | 10.91  |
| P66593 RS6_SALTY 30S ribosomal protein S6                              | 1  |                      | YSAAITGAEGK                      | 24  | 11 | 14 | 113.45 | b1b3°b3b4y2y3y4y5y6y7y9<br>°y9y10y11                          | 1067.52 | 33.202  | 164571 | 2 | 534.27  | -12.12 |
| P66593 RS6_SALTY 30S ribosomal protein S6                              | 2  |                      | FNDAVIR                          | 79  | 7  | 6  | 53.25  | y2y3y4y5y6y7                                                  | 834.44  | 42.336  | 107845 | 2 | 417.72  | -12.14 |
| P66593 RS6_SALTY 30S ribosomal protein S6                              | 3  |                      | HAVTEASPMVK                      | 93  | 11 | 6  | 36.34  | b2b3b4°b4b10y8                                                | 1169.59 | 31.405  | 80406  | 2 | 585.30  | -6.68  |
| P66593 RS6_SALTY 30S ribosomal protein S6                              | 4  |                      | AHYVLMNVEAPQEVIDELETTFR          | 56  | 23 | 15 | 97.31  | b3b5b6b8°b8b10b14y1y4y<br>6y7y8y9°y9y13                       | 2704.34 | 113.211 | 72708  | 3 | 902.12  | 3.07   |
| P66593 RS6_SALTY 30S ribosomal protein S6                              | 5  |                      | HYEIVFMVHPDQSEQVPGMIER           | 2   | 22 | 4  | 13.27  | b4°b4b12y8                                                    | 2641.25 | 78.589  | 10249  | 3 | 881.09  | -2.03  |
| P66593 RS6_SALTY 30S ribosomal protein S6                              | 6  |                      | LEDWGR                           | 38  | 6  | 2  | 29.64  | y3y5                                                          | 775.37  | 38.757  | 25768  | 2 | 388.19  | -9.60  |
| P66593 RS6_SALTY 30S ribosomal protein S6                              | 7  |                      | MRHYEIVFMVHPDQSEQVPGMIE<br>R     | 0   | 24 | 8  | 27.22  | b7b10°b10b11°b11y8y10°y<br>10                                 | 2928.41 | 136.454 | 3799   | 3 | 976.81  | 5.75   |
| P66593 RS6_SALTY 30S ribosomal protein S6                              | 8  | Oxidation+M(6)       | AHYVLMNVEAPQEVIDELETTFR          | 56  | 23 | 4  | 12.89  | b11b14y12*y12                                                 | 2720.33 | 111.996 | 4284   | 2 | 1360.67 | 2.06   |
| P66593 RS6_SALTY 30S ribosomal protein S6                              | 9  | Oxidation+M(19)      | HYEIVFMVHPDQSEQVPGMIER           | 2   | 22 | 8  | 20.59  | b5y9°y9*y9y11°y11y13°y1<br>3                                  | 2657.26 | 128.592 | 3617   | 3 | 886.43  | 4.50   |
| P0A2B1 RS20_SALTY 30S ribosomal protein S20                            | 1  |                      | AFNEMQPIVDR                      | 49  | 11 | 17 | 114.42 | b2b3b4b5b11y2y3y5y6°y6<br>*y6y7y8°y8y9y11*y11                 | 1319.64 | 57.010  | 169945 | 2 | 660.32  | -2.50  |
| P0A2B1 RS20_SALTY 30S ribosomal protein S20                            | 2  |                      | ANLTAQINK                        | 76  | 9  | 5  | 37.96  | b2y5y6y7y9                                                    | 972.54  | 35.256  | 38736  | 2 | 486.77  | -10.54 |
| P0A283 PTGA_SALTY Glucose-ecific phohotransferase enzyme IIA component | 1  |                      | MVAPVDGTIGK                      | 59  | 11 | 11 | 99.55  | b2b3y2y3y5y6y7y8y9y10y<br>11                                  | 1087.57 | 45.979  | 196673 | 2 | 544.29  | -8.64  |
| P0A283 PTGA_SALTY Glucose-ecific phohotransferase enzyme IIA component | 2  |                      | VGDPVIEFDLPLLEEK                 | 115 | 16 | 15 | 113.74 | b1b3b4b5b6b7b10y2y4y6y<br>9y10°y10y11y16                      | 1812.97 | 99.530  | 110032 | 2 | 906.99  | 3.84   |

|                                                                        |    |                       |                                 |     |    |    |        |                                                               |         |         |        |   |         |        |
|------------------------------------------------------------------------|----|-----------------------|---------------------------------|-----|----|----|--------|---------------------------------------------------------------|---------|---------|--------|---|---------|--------|
| P0A283 PTGA_SALTY Glucose-ecific phohotransferase enzyme IIA component | 3  |                       | STLTPVVISNMDEIK                 | 133 | 15 | 6  | 25.98  | y5°y5y8°y8*y8y11                                              | 1646.87 | 73.178  | 9569   | 2 | 823.94  | 3.93   |
| P0A283 PTGA_SALTY Glucose-ecific phohotransferase enzyme IIA component | 4  |                       | DTGTIEIVAPLSGEIVNIEDVPDVV FAEK  | 16  | 29 | 7  | 24.8   | b6b7b10°b10y8°y8y10                                           | 3069.60 | 111.328 | 4635   | 3 | 1023.87 | 5.41   |
| P0A283 PTGA_SALTY Glucose-ecific phohotransferase enzyme IIA component | 5  |                       | IFETNHAFSIESDSGIELFVHFGIDT VELK | 70  | 30 | 8  | 39.16  | b2b4b5b11°b11b12°b12y1                                        | 3394.73 | 125.911 | 3276   | 3 | 1132.25 | 13.74  |
| P0A283 PTGA_SALTY Glucose-ecific phohotransferase enzyme IIA component | 6  |                       | IVGDGIAIKPTGNK                  | 45  | 14 | 13 | 136.43 | b3b4b5y3y4y5°y5*y5y6y7y8y10y11                                | 1382.77 | 43.529  | 244213 | 3 | 461.60  | -19.51 |
| P0A283 PTGA_SALTY Glucose-ecific phohotransferase enzyme IIA component | 7  |                       | STLTPVVISNMDEIKELIK             | 133 | 19 | 4  | 23.34  | b13y3y15y17                                                   | 2130.15 | 93.114  | 328481 | 3 | 710.72  | -9.17  |
| P0A283 PTGA_SALTY Glucose-ecific phohotransferase enzyme IIA component | 8  |                       | VKVGDPVIEFDLPLEEK               | 113 | 18 | 6  | 42.31  | b5°b5b6b7y3y6                                                 | 2040.11 | 96.032  | 129632 | 3 | 680.71  | -6.10  |
| P0A283 PTGA_SALTY Glucose-ecific phohotransferase enzyme IIA component | 9  |                       | IVGDGIAIKPTGNKMVAPVDGTIG K      | 45  | 25 | 3  | 12.27  | b3b5y3                                                        | 2451.35 | 84.888  | 2088   | 3 | 817.79  | -5.18  |
| P0A283 PTGA_SALTY Glucose-ecific phohotransferase enzyme IIA component | 10 |                       | APVDGTIGK                       | 61  | 9  | 0  | 2.49   |                                                               | 857.46  | 45.999  | 6349   | 1 | 857.46  | -9.32  |
| P0A283 PTGA_SALTY Glucose-ecific phohotransferase enzyme IIA component | 11 |                       | PVDGTIGK                        | 62  | 8  | 4  | 35.78  | b3b4b5°b5                                                     | 786.43  | 45.998  | 3408   | 1 | 786.43  | -9.00  |
| P0A1D3 CH60_SALTY 60 kDa chaperonin                                    | 1  |                       | ANDAAGDGTTTATVLAQSIITEGL K      | 80  | 25 | 24 | 177.35 | b2°b2b3°b3b4°b4b5b13b14b15°b15b25y2y3y4y5y6y7y8y9y10y11y21y25 | 2418.23 | 91.970  | 192078 | 3 | 806.75  | -2.12  |
| P0A1D3 CH60_SALTY 60 kDa chaperonin                                    | 2  |                       | EMLPVLEAVAK                     | 231 | 11 | 11 | 86.44  | b2°b2b3y2y3y4y5y6y7y8y11                                      | 1199.66 | 80.215  | 190169 | 2 | 600.33  | -6.61  |
| P0A1D3 CH60_SALTY 60 kDa chaperonin                                    | 3  |                       | AVAAAVEELK                      | 122 | 10 | 8  | 60.61  | b1b2b3y3y5y6y8y10                                             | 1000.56 | 47.377  | 124115 | 2 | 500.78  | -6.71  |
| P0A1D3 CH60_SALTY 60 kDa chaperonin                                    | 4  |                       | QQIEEATSDYDREK                  | 350 | 14 | 18 | 109.13 | b6°b6b14y2°y2y3y4°y4y5y6y7°y7y8y9°y9y12y14*y14                | 1711.75 | 33.424  | 108893 | 3 | 571.26  | -14.83 |
| P0A1D3 CH60_SALTY 60 kDa chaperonin                                    | 5  | Carbamidomethyl+C(6)  | QIVLNCGEPSVVANTVK               | 452 | 18 | 17 | 124.61 | b12°b12°b12y3y5y6°y6y9y10y11y12y13*y13y14y15y18*y18           | 1957.01 | 61.525  | 96715  | 2 | 979.01  | 4.30   |
| P0A1D3 CH60_SALTY 60 kDa chaperonin                                    | 6  | Carbamidomethyl+C(18) | SALQYAASVAGLMITTECMVTDL PK      | 501 | 25 | 8  | 43.26  | b3b7y2y4y5y10y11°y11                                          | 2670.32 | 125.831 | 88650  | 3 | 890.78  | 0.64   |
| P0A1D3 CH60_SALTY 60 kDa chaperonin                                    | 7  |                       | GVNVLADAVK                      | 18  | 10 | 11 | 73.72  | b1b2b9y1y3y5y6y7y8*y8y10                                      | 985.56  | 56.266  | 87174  | 2 | 493.28  | -9.60  |
| P0A1D3 CH60_SALTY 60 kDa chaperonin                                    | 8  | Carbamidomethyl+C(6)  | ALSVPCCDSK                      | 132 | 10 | 12 | 86.82  | b1b2b3°b3y2y4y5y6y7y8y9y10                                    | 1063.50 | 35.018  | 74015  | 2 | 532.26  | -4.48  |
| P0A1D3 CH60_SALTY 60 kDa chaperonin                                    | 9  |                       | SFGAPTITK                       | 42  | 9  | 7  | 52.83  | b2b3°b3y2y3y5y7                                               | 921.49  | 44.890  | 58052  | 2 | 461.25  | -13.38 |
| P0A1D3 CH60_SALTY 60 kDa chaperonin                                    | 10 |                       | AVAAGMNPMDLK                    | 105 | 12 | 9  | 65.3   | b1b3y2y5y7y8y9y10y12                                          | 1217.60 | 58.450  | 56893  | 2 | 609.30  | -0.20  |
| P0A1D3 CH60_SALTY 60 kDa chaperonin                                    | 11 |                       | AIAQVGTISANSDETVGK              | 142 | 18 | 7  | 69.55  | y8y9y10y12y13y14y18                                           | 1760.91 | 48.189  | 53291  | 2 | 880.96  | 2.22   |
| P0A1D3 CH60_SALTY 60 kDa chaperonin                                    | 12 |                       | VEDALHATR                       | 395 | 9  | 9  | 64.18  | b2b5y1y2y3y4y6y7y9                                            | 1011.52 | 26.525  | 53067  | 2 | 506.26  | -6.40  |
| P0A1D3 CH60_SALTY 60 kDa chaperonin                                    | 13 |                       | GGDGNYGYNAAATEEYGNMIDMG ILDPTK  | 470 | 28 | 8  | 26.62  | b2y2y3y4y9y14*y14y28                                          | 2966.29 | 88.218  | 45846  | 3 | 989.44  | 3.21   |
| P0A1D3 CH60_SALTY 60 kDa chaperonin                                    | 14 |                       | AGKPLLIIAEDVEGEALATLVVNT MR     | 242 | 26 | 15 | 115.22 | b5b6b7y1y2y3y4*y4y5*y5y6*y6y7y8y9                             | 2723.50 | 136.288 | 41504  | 3 | 908.50  | -2.15  |

|                                      |    |                       |                                                 |     |    |    |       |                                       |         |         |        |   |         |        |
|--------------------------------------|----|-----------------------|-------------------------------------------------|-----|----|----|-------|---------------------------------------|---------|---------|--------|---|---------|--------|
| [P0A1D3]CH60_SALTY 60 kDa chaperonin | 15 |                       | AVAAGMNPMDLKR                                   | 105 | 13 | 7  | 40.97 | b1b2y3y6y7y9y13                       | 1373.70 | 51.182  | 34533  | 2 | 687.35  | -3.73  |
| [P0A1D3]CH60_SALTY 60 kDa chaperonin | 16 |                       | GQNEQNVGIIK                                     | 430 | 11 | 8  | 68.02 | b2y3y4y6y8y9*y9y11                    | 1201.58 | 26.775  | 25222  | 2 | 601.30  | 3.25   |
| [P0A1D3]CH60_SALTY 60 kDa chaperonin | 17 |                       | ATLEDLGQAK                                      | 311 | 10 | 5  | 40.69 | b7b8y2y4y7                            | 1045.55 | 19.513  | 5813   | 2 | 523.28  | 0.93   |
| [P0A1D3]CH60_SALTY 60 kDa chaperonin | 18 |                       | LAGGVAVIK                                       | 371 | 9  | 6  | 74.27 | b4b5b6y4y7y8                          | 827.52  | 45.086  | 113917 | 2 | 414.26  | -18.96 |
| [P0A1D3]CH60_SALTY 60 kDa chaperonin | 19 |                       | DTTTIIDGVGEEAAIQGR                              | 327 | 18 | 4  | 21.42 | b3b7y8y10                             | 1845.91 | 99.618  | 47713  | 3 | 615.98  | -2.84  |
| [P0A1D3]CH60_SALTY 60 kDa chaperonin | 20 |                       | LIAEAMDK                                        | 160 | 8  | 4  | 40.56 | y4y6y7*y7                             | 890.45  | 39.209  | 33217  | 2 | 445.73  | -14.74 |
| [P0A1D3]CH60_SALTY 60 kDa chaperonin | 21 |                       | VAAVK                                           | 272 | 5  | 1  | 13.11 | b3                                    | 487.32  | 44.829  | 16892  | 1 | 487.32  | -0.50  |
| [P0A1D3]CH60_SALTY 60 kDa chaperonin | 22 |                       | FGNDAR                                          | 7   | 6  | 1  | 13.52 | y5                                    | 679.31  | 41.308  | 4075   | 1 | 679.31  | -3.95  |
| [P0A1D3]CH60_SALTY 60 kDa chaperonin | 23 |                       | GYLSPYFINKPETGAVELESPFILLADKK                   | 197 | 29 | 3  | 11.44 | b4b9y5                                | 3239.70 | 96.522  | 239140 | 4 | 810.68  | -5.88  |
| [P0A1D3]CH60_SALTY 60 kDa chaperonin | 24 |                       | EIELEDKFENMGAMQMVK                              | 58  | 17 | 8  | 51.91 | b3*b3b8b12y6y7y10y13                  | 2010.94 | 73.721  | 183902 | 3 | 670.98  | -7.10  |
| [P0A1D3]CH60_SALTY 60 kDa chaperonin | 25 |                       | IADLKGQNEQNVGIIK                                | 425 | 16 | 10 | 92.97 | b3b11y3y4y8y9y11*y11y12y14            | 1741.89 | 40.083  | 165710 | 3 | 581.30  | -11.49 |
| [P0A1D3]CH60_SALTY 60 kDa chaperonin | 26 | Carbamidomethyl+C(16) | AVAAAVEELKALSVPSCDSK                            | 122 | 20 | 8  | 41.89 | b8y4*y4y6y7y10*y10y18                 | 2045.04 | 72.135  | 74321  | 3 | 682.35  | -8.12  |
| [P0A1D3]CH60_SALTY 60 kDa chaperonin | 27 |                       | GGDGNYGYNAAATEEYGNMIDMGILDPTKVTR                | 470 | 31 | 3  | 11.18 | b25y6y25                              | 3322.53 | 86.630  | 64072  | 3 | 1108.18 | 8.23   |
| [P0A1D3]CH60_SALTY 60 kDa chaperonin | 28 |                       | NVVLKDSFGAPTITK                                 | 36  | 15 | 4  | 29.09 | b10y5y7y9                             | 1589.87 | 58.342  | 63285  | 3 | 530.63  | -12.59 |
| [P0A1D3]CH60_SALTY 60 kDa chaperonin | 29 | Carbamidomethyl+C(13) | AMEAPLRQIVLNCGEEPSVVANTVK                       | 445 | 25 | 5  | 22.38 | b3b10y9y11y13                         | 2725.40 | 74.208  | 48654  | 3 | 909.14  | 1.34   |
| [P0A1D3]CH60_SALTY 60 kDa chaperonin | 30 |                       | VVINKDTTTTIIDGVGEEAAIQGR                        | 322 | 23 | 5  | 28.54 | y3y4y6y12*y12                         | 2399.29 | 67.906  | 11559  | 2 | 1200.15 | 3.77   |
| [P0A1D3]CH60_SALTY 60 kDa chaperonin | 31 |                       | EVASKANDAAGDGTTTATVLAQSIIIEGLK                  | 75  | 30 | 5  | 26.15 | b3b8*b8b9b12                          | 2932.52 | 136.277 | 7214   | 3 | 978.18  | 3.16   |
| [P0A1D3]CH60_SALTY 60 kDa chaperonin | 32 | Carbamidomethyl+C(6)  | QIVLNCGEEPSVVANTVKGGDGNYGYNAAATEEYGNMIDMGILDPTK | 452 | 46 | 3  | 11.28 | b6y3y14                               | 4904.27 | 89.411  | 6603   | 4 | 1226.82 | 0.00   |
| [P0A1D3]CH60_SALTY 60 kDa chaperonin | 33 |                       | VGAATEVEMKEK                                    | 380 | 12 | 4  | 33.86 | b4b6b7y6                              | 1291.67 | 80.604  | 2835   | 2 | 646.34  | 13.51  |
| [P0A1D3]CH60_SALTY 60 kDa chaperonin | 34 | Phosphoryl STY(6)     | GYLSPYFINKPETGAVELESPFILLADK                    | 197 | 28 | 3  | 21.82 | b4b5y3                                | 3191.62 | 110.315 | 4559   | 4 | 798.66  | 10.40  |
| [P0A1D3]CH60_SALTY 60 kDa chaperonin | 35 |                       | AAGMNPMDLKR                                     | 107 | 11 | 1  | 7.39  | b4                                    | 1203.60 | 51.163  | 57696  | 2 | 602.30  | -1.83  |
| [P0A1D3]CH60_SALTY 60 kDa chaperonin | 36 |                       | EDALHATR                                        | 396 | 8  | 0  | 1.66  |                                       | 912.45  | 26.555  | 37880  | 2 | 456.73  | -8.16  |
| [P0A1D3]CH60_SALTY 60 kDa chaperonin | 37 |                       | AAAVEELK                                        | 124 | 8  | 1  | 8.19  | b6                                    | 830.46  | 47.378  | 13379  | 1 | 830.46  | -6.98  |
| [P0A1D3]CH60_SALTY 60 kDa chaperonin | 38 |                       | AGMNPMDLKR                                      | 108 | 10 | 0  | 3.32  |                                       | 1132.55 | 51.173  | 7559   | 2 | 566.78  | -9.05  |
| [P0A1D3]CH60_SALTY 60 kDa chaperonin | 39 |                       | GMNPMDLKR                                       | 109 | 9  | 0  | 3.32  |                                       | 1061.52 | 51.214  | 6860   | 2 | 531.27  | 1.38   |
| [P0A1D3]CH60_SALTY 60 kDa chaperonin | 40 |                       | AAVEELK                                         | 125 | 7  | 1  | 8.19  | b5                                    | 759.42  | 47.327  | 6081   | 1 | 759.42  | -6.99  |
| [P0A1D3]CH60_SALTY 60 kDa chaperonin | 41 |                       | EMLPVLEAVAK                                     | 231 | 11 | 0  | 2.49  |                                       | 1181.64 | 80.185  | 12984  | 2 | 591.32  | -12.50 |
| [P0A1D3]CH60_SALTY 60 kDa chaperonin | 42 |                       | QQIEEATSDYDREK                                  | 350 | 14 | 0  | 3.73  |                                       | 1694.73 | 33.365  | 3122   | 3 | 565.58  | -8.28  |
| [P66038]RISB_SALTY 6                 | 1  |                       | IGQVKDDNITVVVWVPGAYELPLATEALAK                  | 40  | 29 | 13 | 64.33 | b9b10*b10b12b13b14*b14y2y4y9y12y15y29 | 3110.68 | 98.511  | 144825 | 3 | 1037.56 | -0.24  |

|                                        |    |                      |                            |     |    |    |        |                                                                   |         |         |        |   |         |        |
|----------------------------------------|----|----------------------|----------------------------|-----|----|----|--------|-------------------------------------------------------------------|---------|---------|--------|---|---------|--------|
| P66038 RISB_SALTY 6                    | 2  |                      | FNQFINDSLLDGAVDALTR        | 21  | 19 | 20 | 146.82 | b2b4b5b8°b8b9b14*b14b15y2y4y6y8y9y10y13y14y15*y15y19              | 2109.08 | 101.685 | 83660  | 2 | 1055.04 | 6.95   |
| P66038 RISB_SALTY 6                    | 3  |                      | GAEAALEMINVLK              | 136 | 16 | 16 | 117.42 | b2b3°b3b4b5b6°b6b7°b7b8°b8b10b11b12y1y4                           | 1643.90 | 103.423 | 25814  | 2 | 822.46  | -0.37  |
| P66038 RISB_SALTY 6                    | 4  |                      | ANVAAPDAR                  | 5   | 9  | 8  | 59.4   | b2b3b4y2y4y6y7y9                                                  | 884.45  | 22.165  | 16650  | 2 | 442.73  | -12.15 |
| P66038 RISB_SALTY 6                    | 5  |                      | VAITAR                     | 14  | 7  | 3  | 40.15  | y4y5y6                                                            | 743.46  | 44.161  | 18008  | 2 | 372.24  | -18.31 |
| P65702 PGK_SALTY Phohoglycerate kinase | 1  |                      | VLPVAMLEER                 | 373 | 11 | 11 | 99.55  | b2b3y2y4y5y6y7y8y9y10y11                                          | 1227.67 | 80.205  | 219967 | 2 | 614.34  | -5.47  |
| P65702 PGK_SALTY Phohoglycerate kinase | 2  | Carbamidomethyl+C(5) | LLTTCDIPVPTDVR             | 244 | 14 | 23 | 173.4  | b2b5°b5b6b7°b7b9b12°b12b13y1y2y3°y3y5y7y8y9y10y11°y11y12y14       | 1599.85 | 68.512  | 210914 | 2 | 800.43  | 2.98   |
| P65702 PGK_SALTY Phohoglycerate kinase | 3  | Carbamidomethyl+C(6) | FADVACAGPLLAELDALGK        | 156 | 20 | 17 | 147.98 | b2b3b5b8b17y1y2y3y4y5y6y7y8y9y13y14y15                            | 2002.04 | 99.075  | 164324 | 2 | 1001.53 | 6.52   |
| P65702 PGK_SALTY Phohoglycerate kinase | 4  |                      | VATEFSETAPATLK             | 258 | 14 | 26 | 188.55 | b1b2b3°b3b4°b4b6°b6b7b9y1y2y3y4y5°y5y6y7y9y10y11°y11y12°y12y13y14 | 1464.76 | 52.422  | 134618 | 2 | 732.88  | -1.67  |
| P65702 PGK_SALTY Phohoglycerate kinase | 5  |                      | SLYEADLVDEAKR              | 231 | 13 | 8  | 78.24  | b5y3y4y5y6y10y11y13                                               | 1508.74 | 54.317  | 115317 | 3 | 503.58  | -12.86 |
| P65702 PGK_SALTY Phohoglycerate kinase | 6  |                      | ADLNPVKEGK                 | 19  | 11 | 11 | 93.53  | b5°b5b9b10y2y4y6y7y8*y8y9                                         | 1169.65 | 36.821  | 109495 | 2 | 585.33  | -3.86  |
| P65702 PGK_SALTY Phohoglycerate kinase | 7  |                      | TILWNGPVGVFEFPNFR          | 302 | 17 | 18 | 137.06 | b2b4b13*b13y3*y3y4y5y6°y6y7y8y11*y11y12y13y14y17                  | 1993.04 | 106.576 | 96424  | 2 | 997.03  | 5.08   |
| P65702 PGK_SALTY Phohoglycerate kinase | 8  |                      | LTVLDSLSK                  | 197 | 9  | 6  | 37.96  | y2°y2y5y6y7y9                                                     | 975.56  | 61.980  | 75106  | 2 | 488.29  | -8.26  |
| P65702 PGK_SALTY Phohoglycerate kinase | 9  |                      | MTDLDLAGK                  | 5   | 9  | 5  | 30.18  | b6y2y5y8y9                                                        | 963.48  | 48.305  | 56959  | 2 | 482.24  | -6.71  |
| P65702 PGK_SALTY Phohoglycerate kinase | 10 |                      | SVNDVKEDEQILDIGDASAQQLAELK | 272 | 27 | 7  | 22.33  | b9y2y3y4y15*y15y27                                                | 2941.50 | 101.079 | 55011  | 3 | 981.17  | 0.08   |
| P65702 PGK_SALTY Phohoglycerate kinase | 11 |                      | IADQLIVGGGIANTFVAAQGHSVGK  | 206 | 25 | 4  | 16.06  | b3b5y9y19                                                         | 2423.30 | 78.229  | 47151  | 3 | 808.44  | -3.63  |
| P65702 PGK_SALTY Phohoglycerate kinase | 12 |                      | AQASTHGIGK                 | 146 | 10 | 13 | 86.82  | b2°b2b4°b4y1y2y3y4y5y6y7y8y10                                     | 969.50  | 15.675  | 33163  | 2 | 485.25  | -9.19  |
| P65702 PGK_SALTY Phohoglycerate kinase | 13 |                      | MTDLDLAGKR                 | 5   | 10 | 6  | 39.72  | b4y5y8°y8y9y10                                                    | 1119.58 | 42.901  | 31714  | 2 | 560.29  | -4.47  |
| P65702 PGK_SALTY Phohoglycerate kinase | 14 |                      | DYLDGVDVAEGELVVLENVR       | 93  | 20 | 3  | 14.19  | b8b15y7                                                           | 2204.11 | 115.625 | 11645  | 3 | 735.37  | -0.44  |
| P65702 PGK_SALTY Phohoglycerate kinase | 15 | Carbamidomethyl+C(5) | YAALCDVFVMDAFGTAHR         | 128 | 18 | 3  | 15.37  | b8y9y13                                                           | 2043.96 | 90.235  | 10100  | 3 | 681.99  | 6.81   |
| P65702 PGK_SALTY Phohoglycerate kinase | 16 |                      | ISYISTGGGAFLEFVEGK         | 355 | 18 | 7  | 34.22  | b5°b5b7°b7b8b11y11                                                | 1874.98 | 61.815  | 7995   | 2 | 937.99  | 14.45  |
| P65702 PGK_SALTY Phohoglycerate kinase | 17 |                      | KDDEALSK                   | 119 | 8  | 4  | 32.78  | b3°b3y6y7                                                         | 905.47  | 49.853  | 8954   | 2 | 453.24  | 13.21  |
| P65702 PGK_SALTY Phohoglycerate kinase | 18 |                      | SLYEADLVDEAKR              | 231 | 13 | 4  | 27.86  | b4b5b12°b12                                                       | 1508.74 | 107.221 | 3212   | 2 | 754.88  | -10.68 |
| P65702 PGK_SALTY Phohoglycerate kinase | 19 |                      | TDLDLAGK                   | 6   | 8  | 0  | 1.66   |                                                                   | 832.45  | 48.326  | 67791  | 2 | 416.73  | 13.78  |
| P65702 PGK_SALTY Phohoglycerate kinase | 20 |                      | YEADLVDEAKR                | 233 | 11 | 0  | 3.32   |                                                                   | 1308.64 | 54.368  | 34116  | 2 | 654.83  | -0.28  |
| P65702 PGK_SALTY Phohoglycerate kinase | 21 |                      | PAVAMLEER                  | 375 | 9  | 2  | 18.7   | b3b5                                                              | 1015.52 | 80.257  | 26395  | 2 | 508.26  | -8.35  |
| P65702 PGK_SALTY Phohoglycerate kinase | 22 |                      | DLNPVKEGK                  | 20  | 10 | 1  | 7.81   | b3                                                                | 1098.60 | 36.762  | 18617  | 2 | 549.80  | -13.56 |
| P65702 PGK_SALTY Phohoglycerate kinase | 23 |                      | VLDSLSK                    | 199 | 7  | 2  | 8.74   | b4°b4                                                             | 761.43  | 61.973  | 17885  | 1 | 761.43  | -11.22 |

|                                                      |    |                       |                                |     |    |    |        |                                                 |         |         |        |   |         |        |
|------------------------------------------------------|----|-----------------------|--------------------------------|-----|----|----|--------|-------------------------------------------------|---------|---------|--------|---|---------|--------|
| P65702 PGK_SALTY Phohoglycerate kinase               | 24 |                       | LNVPVKEGK                      | 21  | 9  | 0  | 2.49   |                                                 | 983.58  | 36.743  | 11281  | 2 | 492.30  | -3.66  |
| P65702 PGK_SALTY Phohoglycerate kinase               | 25 |                       | TDLDLAGKR                      | 6   | 9  | 0  | 2.07   |                                                 | 988.54  | 42.873  | 10597  | 2 | 494.77  | -1.98  |
| P65702 PGK_SALTY Phohoglycerate kinase               | 26 |                       | ASTHGIGK                       | 148 | 8  | 3  | 36.62  | b4b5b6                                          | 770.41  | 15.680  | 5050   | 2 | 385.71  | -11.09 |
| P65702 PGK_SALTY Phohoglycerate kinase               | 27 |                       | QASTHGIGK                      | 147 | 9  | 3  | 20.5   | b6*b6b8                                         | 898.47  | 15.705  | 2962   | 2 | 449.74  | -9.71  |
| P0A2F6 SSB_SALTY Single-stranded DNA-binding protein | 1  |                       | YTTEINVPIGGVMQMLGGR            | 97  | 20 | 18 | 92.43  | b2*b2b3*b3b4*b4b7*b7b9b12b15*b15y4y5y9y10y13y20 | 2164.11 | 96.553  | 30533  | 2 | 1082.56 | 8.91   |
| P0A2F6 SSB_SALTY Single-stranded DNA-binding protein | 2  |                       | VILVGNLQDPEVR                  | 8   | 14 | 9  | 58.05  | b3y2y4*y4y5y7y8y10y14                           | 1508.84 | 65.794  | 28172  | 2 | 754.93  | 0.97   |
| P0A2F6 SSB_SALTY Single-stranded DNA-binding protein | 3  |                       | GSQVYIEGQLR                    | 74  | 11 | 3  | 35.78  | b8b9b10                                         | 1249.66 | 31.398  | 26646  | 3 | 417.23  | 6.64   |
| P0A2F6 SSB_SALTY Single-stranded DNA-binding protein | 4  |                       | YMPSGGAVANLTLATSESWR           | 22  | 20 | 3  | 14.19  | b15y13y17                                       | 2111.01 | 72.160  | 5605   | 3 | 704.34  | -4.74  |
| P00499 HIS1_SALTY ATP phohoribosyltransferase        | 1  |                       | LIAMAENMPIDILR                 | 38  | 14 | 15 | 163.31 | b3b6b8b10b11b12y2y3y6y8y9y10y11y12y14           | 1599.86 | 90.672  | 104977 | 2 | 800.43  | 1.68   |
| P00499 HIS1_SALTY ATP phohoribosyltransferase        | 2  |                       | LSLATPVDEAWDGPAALDGKR          | 105 | 21 | 11 | 58.42  | b13b14y2y3y11*y11y12*y12y16y17y21               | 2182.11 | 76.288  | 92810  | 3 | 728.04  | -3.24  |
| P00499 HIS1_SALTY ATP phohoribosyltransferase        | 3  | Carbamidomethyl+C(8)  | AGLADAICDLVSTGATLEANGLREVEVIYR | 160 | 30 | 17 | 131.44 | b3b4b5*b5b6b7b8b9b12y3y4y14y15y17y19y23y30      | 3176.63 | 136.565 | 71187  | 3 | 1059.55 | 2.54   |
| P00499 HIS1_SALTY ATP phohoribosyltransferase        | 4  |                       | ALGASSILVLPIEK                 | 282 | 14 | 14 | 86.14  | b1b2b3b5*b5b7*b7y1y4y5y6y7y8y14                 | 1410.86 | 84.576  | 69538  | 2 | 705.93  | 1.47   |
| P00499 HIS1_SALTY ATP phohoribosyltransferase        | 5  |                       | LEEVIALLPGAERPTILPLAGEQQR      | 237 | 25 | 9  | 32.95  | b2*b2b3b4b6y3y6y17y25                           | 2713.51 | 90.046  | 33077  | 3 | 905.17  | -6.48  |
| P00499 HIS1_SALTY ATP phohoribosyltransferase        | 6  | Carbamidomethyl+C(8)  | AGLADAICDLVSTGATLEANGLR        | 160 | 23 | 5  | 29.09  | b8b10b16b17y15                                  | 2288.14 | 114.523 | 6505   | 3 | 763.39  | -4.59  |
| P00499 HIS1_SALTY ATP phohoribosyltransferase        | 7  |                       | VAMHMOVSETLFWETMEK             | 262 | 18 | 4  | 21.42  | b4b8y3y7                                        | 2156.02 | 75.241  | 108017 | 3 | 719.35  | 15.97  |
| P00499 HIS1_SALTY ATP phohoribosyltransferase        | 8  |                       | ELLAR                          | 22  | 5  | 2  | 26.21  | b3b4                                            | 601.36  | 28.239  | 90909  | 1 | 601.36  | -5.28  |
| P00499 HIS1_SALTY ATP phohoribosyltransferase        | 9  | Carbamidomethyl+C(2)  | ACLIQR                         | 192 | 6  | 1  | 13.52  | y4                                              | 760.41  | 32.340  | 14399  | 2 | 380.71  | -2.57  |
| P00499 HIS1_SALTY ATP phohoribosyltransferase        | 10 | Carbamidomethyl+C(2)  | SCLLNGSVEVAPR                  | 147 | 13 | 5  | 38.93  | b10*b10y7y8y9                                   | 1401.69 | 36.550  | 4245   | 2 | 701.35  | -19.77 |
| P00499 HIS1_SALTY ATP phohoribosyltransferase        | 11 |                       | LSLATPVDEAWDGPAALDGK           | 105 | 20 | 4  | 14.19  | b4*b4y8y14                                      | 2026.03 | 85.411  | 3226   | 3 | 676.02  | 10.18  |
| P00499 HIS1_SALTY ATP phohoribosyltransferase        | 12 |                       | LSDDSR                         | 16  | 6  | 1  | 13.52  | y3                                              | 692.32  | 29.097  | 1529   | 1 | 692.32  | -0.26  |
| P00499 HIS1_SALTY ATP phohoribosyltransferase        | 13 | Carbamidomethyl+C(6)  | LDFGGCRLSLATPVDEAWDGPAALDGK    | 98  | 27 | 4  | 11.8   | b3b12*b12y14                                    | 2831.39 | 76.242  | 48825  | 3 | 944.47  | 7.33   |
| P00499 HIS1_SALTY ATP phohoribosyltransferase        | 14 | Carbamidomethyl+C(1)  | CDLVSTGATLEANGLREVEVIYR        | 167 | 23 | 4  | 22.65  | b3b4b15*b15                                     | 2565.29 | 136.618 | 26210  | 3 | 855.77  | -4.09  |
| P0A7X0 RS8_SALTY 30S ribosomal protein S8            | 1  |                       | SMQDPIADMLTR                   | 1   | 12 | 11 | 96.95  | b2b3b4y2y3y4y6y8y9y10y12                        | 1377.65 | 78.426  | 203354 | 2 | 689.33  | 0.27   |
| P0A7X0 RS8_SALTY 30S ribosomal protein S8            | 2  |                       | AVVESIQR                       | 69  | 8  | 14 | 92.98  | b2b3b4b5y1y2*y2y4*y4y5*y5y6y7y8                 | 901.50  | 32.651  | 100463 | 2 | 451.25  | -13.81 |
| P0A7X0 RS8_SALTY 30S ribosomal protein S8            | 3  |                       | AAVTMPSSK                      | 22  | 9  | 15 | 74.27  | b2b4y1y2*y2y3*y3y4*y4y5y6*y6y7*y7y9             | 891.45  | 31.144  | 100159 | 2 | 446.23  | -11.30 |
| P0A7X0 RS8_SALTY 30S ribosomal protein S8            | 4  | Carbamidomethyl+C(10) | QAGLGGEIICYVA                  | 117 | 13 | 10 | 55.93  | b3b7b10*b10*b10y3y6y9y13*y13                    | 1350.66 | 80.968  | 13685  | 1 | 1350.66 | -8.59  |
| P0A7X0 RS8_SALTY 30S ribosomal protein S8            | 5  |                       | VEGDTKPELELTLYFQGK             | 50  | 19 | 9  | 47.41  | b3b7*b7b8b9*b9b11*b11y5                         | 2195.15 | 103.429 | 23959  | 3 | 732.39  | -5.67  |
| P0A7X0 RS8_SALTY 30S ribosomal protein S8            | 6  |                       | NGQAANKAAVTMPSSK               | 15  | 16 | 3  | 16.93  | b9b11y12                                        | 1574.80 | 53.689  | 15306  | 3 | 525.60  | -0.31  |

|                                                 |    |                |                            |     |    |    |        |                                                                                    |         |         |        |   |         |        |
|-------------------------------------------------|----|----------------|----------------------------|-----|----|----|--------|------------------------------------------------------------------------------------|---------|---------|--------|---|---------|--------|
| P0A7X0 RS8_SALTY 30S ribosomal protein S8       | 7  | Oxidation+M(2) | SMQDPIADMLTR               | 1   | 12 | 3  | 32.22  | y3y6y9                                                                             | 1393.66 | 70.522  | 8314   | 2 | 697.33  | 7.62   |
| Q7CR46 IRAP_SALTY Anti-adapter protein iraP     | 1  |                | NMAQNEQEMLIR               | 38  | 12 | 7  | 39.88  | b2b3y8y9*y9y10y12                                                                  | 1476.70 | 55.972  | 60455  | 2 | 738.85  | 5.04   |
| Q7CR46 IRAP_SALTY Anti-adapter protein iraP     | 2  |                | QVEGALEGVKPDASVPDHDTELLR   | 50  | 24 | 10 | 77.57  | b8b9y3y7y8*y8y9y10y11y24                                                           | 2575.27 | 59.907  | 57510  | 4 | 644.57  | -10.33 |
| Q7CR46 IRAP_SALTY Anti-adapter protein iraP     | 3  |                | LAQKEESKELVAQVEALEIIVTAMLR | 11  | 27 | 6  | 36.21  | b2b8b9b10b13y27                                                                    | 3040.66 | 105.978 | 22634  | 3 | 1014.22 | -0.40  |
| P0A2A3 RL1_SALTY 50S ribosomal protein L1       | 1  |                | VGTVTPNVAEAVK              | 141 | 13 | 19 | 139.03 | b2b3*b3b4*b4y3y4*y4y5y7y8y9*y9y10y11*y11y12*y12y13                                 | 1284.71 | 47.882  | 230075 | 2 | 642.86  | -1.52  |
| P0A2A3 RL1_SALTY 50S ribosomal protein L1       | 2  |                | VAVFTQGPNAEAAK             | 74  | 14 | 29 | 207.4  | b2b3b6b9*b9*b9b11*b11*b11b12b13y1y3y4*y4y5y7y8y9*y9y10*y10*y10y11*y11*y11y12y13y14 | 1402.73 | 45.031  | 223631 | 2 | 701.87  | -4.87  |
| P0A2A3 RL1_SALTY 50S ribosomal protein L1       | 3  |                | VVGQLGQVLGPR               | 122 | 12 | 9  | 68.31  | b2b4y3y6y7y8y10*y10y12                                                             | 1222.72 | 59.084  | 160618 | 2 | 611.86  | -4.19  |
| P0A2A3 RL1_SALTY 50S ribosomal protein L1       | 4  |                | GATVLPHTGTR                | 60  | 11 | 9  | 70.33  | b3*b3y3y4y5y6*y6y7y11                                                              | 1065.57 | 29.957  | 35397  | 2 | 533.29  | -4.81  |
| P0A2A3 RL1_SALTY 50S ribosomal protein L1       | 5  |                | QYDINEAIALLK               | 19  | 12 | 6  | 39.88  | b4b12y3y4y5y12                                                                     | 1390.76 | 85.408  | 31681  | 2 | 695.89  | 3.77   |
| P0A2A3 RL1_SALTY 50S ribosomal protein L1       | 6  |                | AAGAELVGMEDLADQIK          | 88  | 17 | 6  | 27.06  | b7y9*y9y10y12y17                                                                   | 1730.87 | 79.704  | 30834  | 2 | 865.94  | 4.09   |
| P0A2A3 RL1_SALTY 50S ribosomal protein L1       | 7  |                | AAGAELVGMEDLADQIKK         | 88  | 18 | 4  | 21.42  | b4b8y9y11                                                                          | 1858.97 | 81.539  | 4912   | 3 | 620.33  | 4.14   |
| P0A2A3 RL1_SALTY 50S ribosomal protein L1       | 8  |                | ELATAK                     | 31  | 6  | 2  | 13.52  | b5*b5                                                                              | 632.36  | 28.150  | 16566  | 1 | 632.36  | -4.44  |
| P0A2A3 RL1_SALTY 50S ribosomal protein L1       | 9  |                | FNESVDVAVNLGIDAR           | 37  | 16 | 6  | 56.55  | b10y3y4y5y11y12                                                                    | 1718.86 | 59.352  | 3320   | 3 | 573.62  | -7.74  |
| P0A2A3 RL1_SALTY 50S ribosomal protein L1       | 10 |                | NGIIHTTIGKVDFDADK          | 167 | 17 | 3  | 23.5   | y3y5y8                                                                             | 1843.97 | 79.047  | 20190  | 2 | 922.49  | 9.67   |
| P0A2A3 RL1_SALTY 50S ribosomal protein L1       | 11 |                | KGEMNFDVVIASPDAMR          | 105 | 17 | 8  | 22.59  | b10*b10*b10b12*b12*b12y3y11                                                        | 1879.90 | 108.296 | 3401   | 2 | 940.45  | -2.08  |
| P0A2A3 RL1_SALTY 50S ribosomal protein L1       | 12 | Oxidation+M(9) | AAGAELVGMEDLADQIK          | 88  | 17 | 4  | 27.06  | b6y4y7y8                                                                           | 1746.85 | 63.876  | 6345   | 3 | 582.96  | -1.96  |
| P0A2A3 RL1_SALTY 50S ribosomal protein L1       | 13 |                | TVLPHGTGR                  | 62  | 9  | 0  | 2.49   |                                                                                    | 937.51  | 29.937  | 27203  | 2 | 469.26  | -9.24  |
| P0A2A3 RL1_SALTY 50S ribosomal protein L1       | 14 |                | LPHGTGR                    | 64  | 7  | 0  | 2.49   |                                                                                    | 737.40  | 29.919  | 3229   | 2 | 369.20  | -12.42 |
| Q8ZLM1 RS13_SALTY 30S ribosomal protein S13     | 1  |                | ISELSEEQIDTLRDEVAK         | 44  | 18 | 15 | 134.76 | b3*b3b7b11b15y6y8y9y10y13y14y15y16y17y18                                           | 2075.03 | 66.376  | 156752 | 3 | 692.35  | -9.53  |
| Q8ZLM1 RS13_SALTY 30S ribosomal protein S13     | 2  |                | IAGINIPDQK                 | 3   | 10 | 8  | 33.61  | y1y2*y2y4*y4y8y9y10                                                                | 1068.60 | 54.380  | 96861  | 2 | 534.80  | -6.17  |
| Q8ZLM1 RS13_SALTY 30S ribosomal protein S13     | 3  |                | ISELSEEQIDTLR              | 44  | 13 | 4  | 20.38  | b6*b6b8y11                                                                         | 1532.79 | 82.826  | 20394  | 2 | 766.90  | 3.58   |
| Q8ZLM1 RS13_SALTY 30S ribosomal protein S13     | 4  |                | AILAAAGIAENVK              | 31  | 13 | 3  | 20.38  | b3y7y9                                                                             | 1240.71 | 61.221  | 10368  | 2 | 620.86  | -9.05  |
| P0A2M5 UPP_SALTY Uracil phohoribosyltransferase | 1  |                | AGLGMMEGVLENVPSAR          | 78  | 17 | 10 | 61.83  | b12b13*b13y4y6y7y12*y12y14y17                                                      | 1730.87 | 81.999  | 58023  | 2 | 865.94  | 5.99   |
| P0A2M5 UPP_SALTY Uracil phohoribosyltransferase | 2  |                | VLVLVAAPEGIAALEK           | 155 | 16 | 9  | 71.32  | b1b2b3b4b5b6b7y9y11                                                                | 1592.97 | 86.013  | 42835  | 2 | 796.99  | 5.21   |
| P0A2M5 UPP_SALTY Uracil phohoribosyltransferase | 3  |                | NEETLEPVYPYFK              | 103 | 13 | 4  | 27.86  | y5y7y8y13                                                                          | 1593.78 | 65.371  | 18653  | 2 | 797.40  | 1.99   |
| P0A2M5 UPP_SALTY Uracil phohoribosyltransferase | 4  |                | ISVVGMYR                   | 95  | 8  | 3  | 40.56  | y4y5y7                                                                             | 924.49  | 54.998  | 14682  | 2 | 462.75  | -5.88  |
| P0A2M5 UPP_SALTY Uracil phohoribosyltransferase | 5  |                | ITVVPILR                   | 70  | 8  | 4  | 40.56  | y2y4y5y6                                                                           | 910.60  | 70.145  | 14155  | 2 | 455.81  | -5.70  |

|                                                  |    |                       |                                     |     |    |    |        |                                              |         |         |        |   |         |        |
|--------------------------------------------------|----|-----------------------|-------------------------------------|-----|----|----|--------|----------------------------------------------|---------|---------|--------|---|---------|--------|
| [P0A2M5]UPP_SALTY Uracil phohoribosyltransferase | 6  |                       | LGLMRENDISTK                        | 14  | 12 | 5  | 22.01  | b6y2y6y8*y8                                  | 1376.73 | 66.289  | 7527   | 2 | 688.87  | 7.98   |
| [P0A2M5]UPP_SALTY Uracil phohoribosyltransferase | 7  |                       | AHPDVELYTASIDQGLNEHGYYIP GLGDAGDK   | 171 | 32 | 4  | 11.08  | b4b8*b8y5                                    | 3365.65 | 102.078 | 3037   | 4 | 842.17  | 5.08   |
| [P0A2M5]UPP_SALTY Uracil phohoribosyltransferase | 8  |                       | ELASEVGSLLTYEATADLETEK              | 29  | 22 | 5  | 25.21  | b4b7b13y3y7                                  | 2369.16 | 108.905 | 1505   | 2 | 1185.08 | -0.41  |
| [P0A2M5]UPP_SALTY Uracil phohoribosyltransferase | 9  |                       | ISVVGMYRNEETLEVPYFQK                | 95  | 21 | 4  | 22.15  | b12*b12b13y17                                | 2499.23 | 73.023  | 6935   | 3 | 833.75  | -11.82 |
| [P64052]EFTS_SALTY Elongation factor Ts          | 1  |                       | VASLEGDVLGSYQHGAR                   | 134 | 17 | 14 | 114.82 | b2b8b9*b9b14y3y4y6y7y8 y11y12y13y17          | 1758.86 | 59.104  | 161257 | 3 | 586.96  | -9.86  |
| [P64052]EFTS_SALTY Elongation factor Ts          | 2  |                       | ITDVEVLK                            | 104 | 8  | 8  | 62     | b3y1y2y3y5y6y7y8                             | 916.52  | 48.611  | 134439 | 2 | 458.77  | -12.19 |
| [P64052]EFTS_SALTY Elongation factor Ts          | 3  |                       | AEITASLVK                           | 1   | 9  | 9  | 59.4   | b4*b4b5*b5y2y5y6y7y9                         | 931.54  | 48.718  | 112606 | 2 | 466.27  | -9.96  |
| [P64052]EFTS_SALTY Elongation factor Ts          | 4  |                       | IGENINIR                            | 125 | 8  | 6  | 53.67  | y3y4y5y7*y7y8                                | 928.51  | 44.490  | 105548 | 2 | 464.76  | -10.91 |
| [P64052]EFTS_SALTY Elongation factor Ts          | 5  |                       | FTGEVSLTGQPFVMEPSK                  | 222 | 18 | 7  | 34.22  | b15y3y10*y10y12y13y18                        | 1953.97 | 74.688  | 99852  | 2 | 977.49  | 4.81   |
| [P64052]EFTS_SALTY Elongation factor Ts          | 6  |                       | IGVLVAAK                            | 151 | 8  | 7  | 66.77  | b2y3y4y5y6y7y8                               | 770.50  | 47.344  | 70436  | 2 | 385.75  | -14.18 |
| [P64052]EFTS_SALTY Elongation factor Ts          | 7  | Carbamidomethyl+C(8)  | TGAGMMDCKK                          | 15  | 10 | 5  | 41.39  | y1y3y5y7y10                                  | 1098.47 | 20.951  | 54510  | 2 | 549.74  | -4.11  |
| [P64052]EFTS_SALTY Elongation factor Ts          | 8  |                       | AGNVAADGVIK                         | 52  | 11 | 5  | 27.03  | b9y1y6y7y11                                  | 1014.55 | 36.606  | 21777  | 2 | 507.78  | -6.08  |
| [P64052]EFTS_SALTY Elongation factor Ts          | 9  |                       | DAGFQAFADK                          | 85  | 10 | 6  | 26.62  | b2b3b5y8*y8y10                               | 1069.51 | 28.175  | 16547  | 2 | 535.26  | 9.93   |
| [P64052]EFTS_SALTY Elongation factor Ts          | 10 | Carbamidomethyl+C(13) | IDGNVAFILEVNCQTDFVAK                | 65  | 20 | 5  | 20.97  | b6*b6b8b13y20                                | 2253.14 | 83.410  | 2000   | 2 | 1127.07 | 7.15   |
| [P64052]EFTS_SALTY Elongation factor Ts          | 11 |                       | ALTEANGDIELAIENMR                   | 25  | 17 | 6  | 33.56  | b6*b6b12y3y7y8                               | 1859.92 | 58.825  | 3517   | 3 | 620.65  | 2.76   |
| [P64052]EFTS_SALTY Elongation factor Ts          | 12 |                       | EYQVQLDIAMQSGKPK                    | 193 | 16 | 4  | 16.93  | b7b14y5*y5                                   | 1834.90 | 99.578  | 1806   | 4 | 459.48  | -21.22 |
| [P64052]EFTS_SALTY Elongation factor Ts          | 13 | Carbamidomethyl+C(13) | IDGNVAFILEVNCQTDFVAKDAGF QAFADK     | 65  | 30 | 6  | 35.05  | b5b6*b6b10y5y6                               | 3303.64 | 107.325 | 2992   | 3 | 1101.89 | 13.15  |
| [P64052]EFTS_SALTY Elongation factor Ts          | 14 | Phosphoryl STY(12)    | EYQVQLDIAMQSGKPK                    | 193 | 16 | 3  | 16.93  | b10y5y10                                     | 1914.91 | 67.964  | 209044 | 3 | 638.97  | 7.08   |
| [P64052]EFTS_SALTY Elongation factor Ts          | 15 | Oxidation+M(4)        | QLAMHVAASKPEFVKPEDVSADV VEK         | 167 | 26 | 7  | 39.7   | b4*b4b6y7y8y9y11                             | 2840.45 | 136.340 | 7284   | 3 | 947.49  | -0.95  |
| [P64052]EFTS_SALTY Elongation factor Ts          | 16 |                       | GVLVAAK                             | 152 | 7  | 0  | 1.24   |                                              | 657.43  | 47.394  | 17896  | 1 | 657.43  | -2.60  |
| [P64052]EFTS_SALTY Elongation factor Ts          | 17 |                       | ITASLVK                             | 3   | 7  | 0  | 1.66   |                                              | 731.46  | 48.724  | 15490  | 1 | 731.46  | -4.09  |
| [P64052]EFTS_SALTY Elongation factor Ts          | 18 | Carbamidomethyl+C(7)  | GAGMMDCKK                           | 16  | 9  | 0  | 2.07   |                                              | 997.42  | 20.901  | 12711  | 2 | 499.22  | -3.18  |
| [P64052]EFTS_SALTY Elongation factor Ts          | 19 |                       | VASLEGDVLGS                         | 134 | 11 | 1  | 7.29   | y3                                           | 1046.54 | 59.003  | 5205   | 2 | 523.77  | 4.67   |
| [P64052]EFTS_SALTY Elongation factor Ts          | 20 |                       | TDVEVLK                             | 105 | 7  | 3  | 24.44  | b3b4*b4                                      | 803.45  | 48.629  | 4748   | 1 | 803.45  | -5.62  |
| [P66541]RS2_SALTY 30S ribosomal protein S2       | 1  |                       | TVPMFNEALAE LNK                     | 45  | 14 | 8  | 82.36  | y1y3y5y7y9y11y12y14                          | 1576.81 | 84.563  | 221832 | 2 | 788.91  | 1.55   |
| [P66541]RS2_SALTY 30S ribosomal protein S2       | 2  |                       | WLGGM LTNWK                         | 95  | 10 | 11 | 52.04  | b7b9*b9y3*y3y4*y4*y4y8 *y8y10                | 1205.61 | 86.565  | 149533 | 2 | 603.31  | -2.43  |
| [P66541]RS2_SALTY 30S ribosomal protein S2       | 3  |                       | MATVSMR DMLK                        | 0   | 11 | 6  | 24.02  | b4y1y2y4y10y11                               | 1282.62 | 59.373  | 64144  | 3 | 428.21  | -5.71  |
| [P66541]RS2_SALTY 30S ribosomal protein S2       | 4  | Carbamidomethyl+C(6)  | EAANSCDQFFVNHR                      | 81  | 14 | 4  | 44.39  | y3y4y7y8                                     | 1694.71 | 47.371  | 59662  | 3 | 565.58  | -12.61 |
| [P66541]RS2_SALTY 30S ribosomal protein S2       | 5  |                       | EANNLGIPVFAIVDTNSDPDGVDF VIPGNDDAIR | 174 | 34 | 17 | 63.32  | b5*b5*b5b7*b7*b7b8b25y3y4y6y7y8*y8y10*y10y34 | 3569.75 | 104.345 | 30106  | 3 | 1190.59 | 2.94   |

|                                             |    |                                             |                                 |     |    |    |        |                                                 |         |         |        |   |         |        |
|---------------------------------------------|----|---------------------------------------------|---------------------------------|-----|----|----|--------|-------------------------------------------------|---------|---------|--------|---|---------|--------|
| P66541 RS2_SALTY 30S ribosomal protein S2   | 6  |                                             | DLETQSQDGTFEK                   | 115 | 13 | 5  | 27.86  | b2y6y9y10°y10                                   | 1497.68 | 40.126  | 10442  | 2 | 749.34  | 4.16   |
| P66541 RS2_SALTY 30S ribosomal protein S2   | 7  |                                             | ILFVGTK                         | 66  | 7  | 4  | 53.25  | y3y4y5y6                                        | 777.48  | 57.270  | 40755  | 2 | 389.24  | -15.15 |
| P66541 RS2_SALTY 30S ribosomal protein S2   | 8  |                                             | YWNPK                           | 21  | 5  | 1  | 13.11  | b3                                              | 707.35  | 33.030  | 16226  | 1 | 707.35  | -7.42  |
| P66541 RS2_SALTY 30S ribosomal protein S2   | 9  |                                             | AGVHFGHQTR                      | 11  | 10 | 6  | 53.8   | b7b8y6y8y9°y9                                   | 1109.54 | 87.779  | 2845   | 1 | 1109.54 | -15.51 |
| P66541 RS2_SALTY 30S ribosomal protein S2   | 10 |                                             | MATVSMRDMLK                     | 0   | 11 | 4  | 24.02  | b10°b10y3y6                                     | 1282.62 | 127.000 | 1611   | 2 | 641.81  | -11.99 |
| P66541 RS2_SALTY 30S ribosomal protein S2   | 11 | Oxidation+M(5)                              | ATVSMRDMLK                      | 1   | 10 | 4  | 51.48  | y4y6y7y8                                        | 1167.57 | 38.771  | 9506   | 2 | 584.29  | -13.28 |
| P66541 RS2_SALTY 30S ribosomal protein S2   | 12 | Oxidation+M(5)                              | WLGGMLTNWK                      | 95  | 10 | 6  | 39.72  | b4b7b8°b8*b8y7                                  | 1221.61 | 136.421 | 2147   | 1 | 1221.61 | 2.40   |
| P66643 RS9_SALTY 30S ribosomal protein S9   | 1  |                                             | GGGISQAGAIR                     | 68  | 12 | 9  | 53.96  | b2b3y5y6y7*y7y8*y8y12                           | 1043.55 | 33.305  | 110457 | 2 | 522.28  | -10.76 |
| P66643 RS9_SALTY 30S ribosomal protein S9   | 2  |                                             | SLEQYFGR                        | 33  | 8  | 8  | 62     | b3y2y3y4y5y6°y6y8                               | 999.48  | 60.636  | 101771 | 2 | 500.25  | -4.76  |
| P66643 RS9_SALTY 30S ribosomal protein S9   | 3  |                                             | AENQYYGTGR                      | 1   | 10 | 5  | 26.62  | b2°b2b4y6y8                                     | 1158.51 | 26.758  | 72596  | 2 | 579.76  | -3.06  |
| P66643 RS9_SALTY 30S ribosomal protein S9   | 4  |                                             | ALMEYDESLRGELR                  | 85  | 14 | 4  | 19.04  | b4°b4b10y8                                      | 1681.84 | 72.102  | 41752  | 3 | 561.29  | 12.85  |
| P66643 RS9_SALTY 30S ribosomal protein S9   | 5  |                                             | SGQAGAIR                        | 72  | 8  | 0  | 2.9    |                                                 | 759.41  | 33.369  | 2644   | 1 | 759.41  | -7.07  |
| Q8ZK81 RS18_SALTY 30S ribosomal protein S18 | 1  |                                             | YLSLLPYTDR                      | 63  | 10 | 9  | 86.03  | b2b3b9y4y5y6y7y8y10                             | 1240.65 | 75.236  | 164651 | 2 | 620.83  | -3.44  |
| Q8ZK81 RS18_SALTY 30S ribosomal protein S18 | 2  |                                             | NYITESGK                        | 30  | 8  | 7  | 40.56  | b1y3y4°y4y6°y6y8                                | 911.44  | 29.180  | 67760  | 2 | 456.23  | -2.28  |
| Q8ZK81 RS18_SALTY 30S ribosomal protein S18 | 3  |                                             | FTAEGVQEIDYK                    | 12  | 12 | 3  | 35.23  | b5b6b7                                          | 1399.64 | 91.034  | 13169  | 3 | 467.22  | -22.15 |
| Q8ZK81 RS18_SALTY 30S ribosomal protein S18 | 4  |                                             | YLSLLPYTDRHQ                    | 63  | 12 | 3  | 32.22  | y3y7y10                                         | 1505.76 | 67.866  | 76866  | 3 | 502.59  | -13.05 |
| Q8ZKP7 TPIS_SALTY Triosephohate isomerase   | 1  | Carbamidomethyl+C(8)                        | ELTGVAGCDVAIAPPEMYIDLAKR        | 28  | 24 | 8  | 32.07  | b3°b3b6y4y10y12y18y24                           | 2589.31 | 82.839  | 99674  | 3 | 863.78  | 1.98   |
| Q8ZKP7 TPIS_SALTY Triosephohate isomerase   | 2  |                                             | DIGAQYIIHGSERR                  | 84  | 15 | 5  | 25.44  | b5b11y4y8y15                                    | 1727.93 | 59.142  | 66148  | 2 | 864.47  | 7.21   |
| Q8ZKP7 TPIS_SALTY Triosephohate isomerase   | 3  |                                             | SATPAQAQAVHK                    | 176 | 12 | 19 | 109.09 | b2b3b9b12y1y2y4y5*y5y6y7*y7y8*y8y9*y9y10*y10y12 | 1208.63 | 18.180  | 65956  | 2 | 604.82  | -6.97  |
| Q8ZKP7 TPIS_SALTY Triosephohate isomerase   | 4  |                                             | TQGAAAFEGAVIAYEPVWAI GTG K      | 152 | 24 | 14 | 74.65  | b2b3b4b5b10b11b13b14*b14y1y2y4y16y24            | 2407.24 | 93.647  | 30041  | 2 | 1204.12 | 3.96   |
| Q8ZKP7 TPIS_SALTY Triosephohate isomerase   | 5  |                                             | DIGAQYIIHGSER                   | 84  | 14 | 6  | 32.65  | b5b12°b12y4y5y14                                | 1571.83 | 64.552  | 10411  | 2 | 786.42  | 7.46   |
| Q8ZKP7 TPIS_SALTY Triosephohate isomerase   | 6  | Carbamidomethyl+C(9)                        | EQGLTPVLCIGETEAENEAGK           | 117 | 21 | 3  | 13.7   | b5y5y8                                          | 2245.10 | 56.997  | 9749   | 4 | 562.03  | 16.86  |
| Q8ZKP7 TPIS_SALTY Triosephohate isomerase   | 7  |                                             | AAAGSHIMLGAQNVDNLSGAFTGETSAEMLK | 52  | 32 | 4  | 15.69  | b4b9b11y12                                      | 3204.62 | 106.536 | 1985   | 3 | 1068.88 | 16.61  |
| Q8ZKP7 TPIS_SALTY Triosephohate isomerase   | 8  | Carbamidomethyl+C(9); Carbamidomethyl+C(26) | EQGLTPVLCIGETEAENEAGKTEEVCAR    | 117 | 28 | 17 | 123.98 | b5°b5b7°b7y4y6y7y9y10y16y18y20y21y23°y23y24y26  | 3090.43 | 72.181  | 188735 | 3 | 1030.82 | -0.87  |
| Q8ZKP7 TPIS_SALTY Triosephohate isomerase   | 9  |                                             | TPAQAQAVHK                      | 178 | 10 | 10 | 60.65  | b3°b3b4°b4*b4b5°b5b7b8°b8                       | 1050.56 | 18.179  | 24841  | 2 | 525.78  | -9.18  |
| P0A2A1 RL19_SALTY 50S ribosomal protein L19 | 1  |                                             | VFQTHSPVVDLSIAVK                | 72  | 15 | 11 | 101.98 | b1b4b6b7b8b11b13y5y6y9y11                       | 1626.87 | 56.024  | 150849 | 3 | 542.96  | -11.10 |
| P0A2A1 RL19_SALTY 50S ribosomal protein L19 | 2  |                                             | VWVVEGTK                        | 29  | 8  | 5  | 32.78  | b2b5y2y4y5                                      | 917.50  | 25.823  | 4812   | 2 | 459.25  | -10.38 |
| P0A2A1 RL19_SALTY 50S ribosomal protein L19 | 3  |                                             | QNVPSFRPGDTVEVK                 | 14  | 15 | 5  | 17.9   | b7°b7b9y12°y12                                  | 1672.84 | 73.019  | 4184   | 2 | 836.92  | -16.49 |



|                                             |    |                       |                                  |     |    |    |        |                                             |         |         |       |   |         |        |
|---------------------------------------------|----|-----------------------|----------------------------------|-----|----|----|--------|---------------------------------------------|---------|---------|-------|---|---------|--------|
| P0A2A1 RL19_SALTY 50S ribosomal protein L19 | 4  |                       | QLEQEQMKNVPSFRPGDTVEVK           | 6   | 23 | 4  | 26.25  | b10b11y9y12                                 | 2687.32 | 54.603  | 59360 | 4 | 672.59  | -9.54  |
| P0A2A1 RL19_SALTY 50S ribosomal protein L19 | 5  |                       | MSNIIKQLEQEOMK                   | 0   | 14 | 5  | 30.38  | b4y5*y5y6y8                                 | 1719.90 | 72.098  | 12520 | 2 | 860.45  | 10.65  |
| P0A1P6 GLNA_SALTY Glutamine synthetase      | 1  |                       | LVPGYEAPVMLAYSAR                 | 322 | 16 | 17 | 152.68 | b2b9°b9b10b14b15y3y4y5°y5y7y8°y8y9y10y13y14 | 1736.92 | 77.591  | 50028 | 2 | 868.96  | 6.54   |
| P0A1P6 GLNA_SALTY Glutamine synthetase      | 2  |                       | AINALANPTTNSYK                   | 307 | 14 | 9  | 75.14  | b3y5y7y8y9°y9y10y12y14                      | 1477.77 | 47.739  | 35504 | 2 | 739.39  | 0.74   |
| P0A1P6 GLNA_SALTY Glutamine synthetase      | 3  |                       | AINALANPTTNSYKR                  | 307 | 15 | 5  | 34.43  | b2y8y9y10y15                                | 1633.87 | 42.791  | 28402 | 3 | 545.29  | 0.30   |
| P0A1P6 GLNA_SALTY Glutamine synthetase      | 4  |                       | ATGIADTVLFGPEPEFFLFDDIR          | 117 | 23 | 7  | 24.18  | b2b10b13y2y3y11y13                          | 2570.27 | 117.345 | 19457 | 3 | 857.43  | -3.61  |
| P0A1P6 GLNA_SALTY Glutamine synthetase      | 5  |                       | GINESDMVLMPDASTAVIDPFFADSTLIIR   | 59  | 30 | 8  | 48.42  | b8b9b11y3y11y12°y12y13                      | 3238.61 | 113.500 | 17925 | 3 | 1080.21 | 2.56   |
| P0A1P6 GLNA_SALTY Glutamine synthetase      | 6  |                       | AGGVFTDEAIDAYIALR                | 430 | 17 | 7  | 62.7   | b3b9b10b14b15b16y13                         | 1781.90 | 76.315  | 17776 | 3 | 594.64  | -4.38  |
| P0A1P6 GLNA_SALTY Glutamine synthetase      | 7  |                       | EQHVTIPAHQVNAEFFEEGK             | 28  | 20 | 4  | 23.61  | y4y5°y5y11                                  | 2310.10 | 68.656  | 7956  | 3 | 770.71  | -4.65  |
| P0A1P6 GLNA_SALTY Glutamine synthetase      | 8  |                       | SAEHLVTMLNEHEVK                  | 1   | 15 | 4  | 25.44  | b3b5y4y7                                    | 1736.89 | 36.452  | 9462  | 4 | 434.98  | 13.35  |
| P0A1P6 GLNA_SALTY Glutamine synthetase      | 9  |                       | GGYFPVPPVDSAQDIR                 | 177 | 16 | 6  | 44.41  | b3b4b6b13y6y10                              | 1717.83 | 92.573  | 3286  | 2 | 859.42  | -12.01 |
| P0A1P6 GLNA_SALTY Glutamine synthetase      | 10 |                       | NLYDLPPEEAK                      | 395 | 11 | 6  | 55.46  | b8y5°y5y6y8y10                              | 1288.62 | 80.608  | 2836  | 2 | 644.82  | -13.83 |
| P0A1P6 GLNA_SALTY Glutamine synthetase      | 11 | Carbamidomethyl+C(11) | FPDPAANPYLCFAALLMAGLDGIK         | 360 | 24 | 5  | 28.37  | b6b7b12b14y8                                | 2565.28 | 105.448 | 2619  | 3 | 855.77  | -2.38  |
| P0A1P6 GLNA_SALTY Glutamine synthetase      | 12 |                       | EIPQVAGSLEEALNALDLDR             | 406 | 20 | 4  | 27.59  | b5b9y4y5                                    | 2153.06 | 81.530  | 1759  | 2 | 1077.03 | -22.11 |
| P0A1P6 GLNA_SALTY Glutamine synthetase      | 13 | Carbamidomethyl+C(11) | FPDPAANPYLCFAALLMAGLDGIK<br>NK   | 360 | 26 | 6  | 26.28  | b3b6b10*b10b13*b13                          | 2807.42 | 129.071 | 29476 | 3 | 936.48  | -1.04  |
| P0A1P6 GLNA_SALTY Glutamine synthetase      | 14 |                       | NGTNLFSGDKYAGLSEQUALYYIG<br>GVIK | 277 | 27 | 6  | 38.65  | b4b8b13b15y3y4                              | 2878.46 | 100.704 | 25088 | 3 | 960.16  | -1.95  |
| P0A1P6 GLNA_SALTY Glutamine synthetase      | 15 |                       | GHRPGVKGGYFPVPPVDSAQDIR          | 170 | 23 | 4  | 12.89  | b15b17y16°y16                               | 2449.27 | 136.728 | 1624  | 3 | 817.10  | 0.40   |
| P0A1P6 GLNA_SALTY Glutamine synthetase      | 16 | Phosphoryl STY(13)    | AGGVFTDEAIDAYIALR                | 430 | 17 | 6  | 22.59  | b6°b6b12y6y8°y8                             | 1861.88 | 50.770  | 10398 | 2 | 931.44  | 7.15   |
| P0A1P6 GLNA_SALTY Glutamine synthetase      | 17 | Phosphoryl STY(8)     | EIPQVAGSLEEALNALDLDR             | 406 | 20 | 6  | 31.79  | b6y5y7°y7y11y12                             | 2233.07 | 103.317 | 2699  | 3 | 745.03  | 2.08   |
| P0A1P6 GLNA_SALTY Glutamine synthetase      | 18 |                       | FTDEAIDAYIALR                    | 434 | 13 | 4  | 24.75  | b3b11°b11b12                                | 1497.76 | 76.290  | 5446  | 2 | 749.38  | -0.33  |
| P0A1P6 GLNA_SALTY Glutamine synthetase      | 19 |                       | NALANPTTNSYKR                    | 309 | 13 | 0  | 4.15   |                                             | 1449.74 | 42.803  | 2601  | 2 | 725.37  | -3.87  |
| P0A1P6 GLNA_SALTY Glutamine synthetase      | 20 |                       | ANPTTNSYKR                       | 312 | 10 | 0  | 4.15   |                                             | 1151.59 | 42.804  | 1661  | 2 | 576.30  | 9.54   |
| Q7CPE2 ATPB_SALTY ATP synthase subunit beta | 1  |                       | QLDPLVVGQEHYDTAR                 | 343 | 16 | 9  | 83.29  | y3°y3y4y5y6y9y10y11°y11                     | 1840.90 | 57.990  | 44312 | 3 | 614.31  | -8.62  |
| Q7CPE2 ATPB_SALTY ATP synthase subunit beta | 2  |                       | MPSAVGYQPTLAEEMGVLQER            | 261 | 21 | 9  | 45.2   | b6°b6b8y3y4y6y9y13y21                       | 2306.13 | 81.531  | 39195 | 2 | 1153.57 | 6.78   |
| Q7CPE2 ATPB_SALTY ATP synthase subunit beta | 3  |                       | TVNMMELIR                        | 156 | 9  | 6  | 45.05  | b3y3y6°y6y7y9                               | 1106.57 | 76.359  | 37026 | 2 | 553.79  | -4.08  |
| Q7CPE2 ATPB_SALTY ATP synthase subunit beta | 4  | Carbamidomethyl+C(6)  | VIDLMCPFAK                       | 132 | 10 | 4  | 28.38  | b9y6y7y8°                                   | 1193.59 | 81.028  | 36177 | 2 | 597.30  | -9.10  |
| Q7CPE2 ATPB_SALTY ATP synthase subunit beta | 5  |                       | FLSQPFFVAEVFTGSPGK               | 399 | 18 | 8  | 30.55  | b8b11*b11y3y14°y14y16y18                    | 1958.02 | 99.926  | 31446 | 2 | 979.51  | 4.80   |
| Q7CPE2 ATPB_SALTY ATP synthase subunit beta | 6  |                       | QIASLGIYPAVDPLDSTSR              | 324 | 19 | 7  | 47.41  | b12y4y7y11y12y13y19                         | 2003.05 | 80.418  | 30076 | 2 | 1002.03 | 4.21   |
| Q7CPE2 ATPB_SALTY ATP synthase subunit beta | 7  |                       | VGLFGGAGVGK                      | 145 | 11 | 3  | 31.01  | y4y7y8                                      | 961.54  | 59.091  | 28139 | 2 | 481.27  | -10.47 |

|                                                              |    |                       |                                     |     |    |    |        |                                                         |         |         |        |   |         |        |
|--------------------------------------------------------------|----|-----------------------|-------------------------------------|-----|----|----|--------|---------------------------------------------------------|---------|---------|--------|---|---------|--------|
| Q7CPE2 ATPB_SALTY ATP synthase subunit beta                  | 8  |                       | AAPSYEELSNSQELLETGIK                | 112 | 20 | 5  | 14.19  | b3b14y1y18y20                                           | 2179.09 | 73.566  | 26620  | 2 | 1090.05 | 5.15   |
| Q7CPE2 ATPB_SALTY ATP synthase subunit beta                  | 9  |                       | VALTGLTMAEK                         | 219 | 11 | 12 | 110.44 | b2b3b5y3y4y5y7y8°y8y9y10y11                             | 1133.62 | 59.186  | 19834  | 2 | 567.31  | -5.17  |
| Q7CPE2 ATPB_SALTY ATP synthase subunit beta                  | 10 |                       | GIMEGEYDHLPEQAFYMVGSIDE AVEK        | 429 | 27 | 6  | 17.87  | y1y2y5y7°y7y25                                          | 3057.38 | 101.698 | 8594   | 3 | 1019.80 | -2.79  |
| Q7CPE2 ATPB_SALTY ATP synthase subunit beta                  | 11 |                       | NIAIEHSGYSVFAGVGER                  | 165 | 18 | 4  | 24.29  | y8y11°y11y12                                            | 1905.94 | 67.678  | 4357   | 3 | 635.99  | -1.41  |
| Q7CPE2 ATPB_SALTY ATP synthase subunit beta                  | 12 |                       | TIAMGSSDGLRR                        | 53  | 12 | 3  | 22.01  | b4b9y9                                                  | 1263.63 | 33.331  | 3640   | 2 | 632.32  | -13.91 |
| Q7CPE2 ATPB_SALTY ATP synthase subunit beta                  | 13 |                       | YQELK                               | 367 | 5  | 2  | 26.21  | b3b4                                                    | 680.36  | 30.850  | 7570   | 1 | 680.36  | -5.74  |
| Q7CPE2 ATPB_SALTY ATP synthase subunit beta                  | 14 |                       | GEIGEERWAIHR                        | 99  | 13 | 3  | 25.15  | b3b4y12                                                 | 1581.78 | 104.500 | 22210  | 2 | 791.40  | 4.24   |
| Q7CPE2 ATPB_SALTY ATP synthase subunit beta                  | 15 |                       | ATLGRIMNVLGEPVDMK                   | 82  | 17 | 3  | 16.1   | b5y4y10                                                 | 1843.96 | 86.877  | 4878   | 2 | 922.48  | -10.86 |
| Q7CPE2 ATPB_SALTY ATP synthase subunit beta                  | 16 | Phosphoryl STY(8)     | QIASLGIYPAVDPLDSTSR                 | 324 | 19 | 4  | 20.39  | b6b9y5y13_H3PO4 y13                                     | 2082.98 | 117.017 | 6754   | 3 | 695.00  | -11.72 |
| Q7CPE2 ATPB_SALTY ATP synthase subunit beta                  | 17 | Phosphoryl STY(4)     | VALTGLTMAEK                         | 219 | 11 | 5  | 51.99  | b4b10y4y6y9                                             | 1213.58 | 73.258  | 3607   | 2 | 607.29  | -1.81  |
| Q7CPE2 ATPB_SALTY ATP synthase subunit beta                  | 18 | Oxidation+M(2)        | IMNVLGEPVDMK                        | 87  | 12 | 3  | 25.99  | b4y6y7                                                  | 1361.70 | 90.976  | 12291  | 2 | 681.35  | 13.63  |
| Q7CPE2 ATPB_SALTY ATP synthase subunit beta                  | 19 |                       | MPSAVGYQPTLAEEMGVLQ                 | 261 | 19 | 1  | 7.7    | y13                                                     | 2021.00 | 81.434  | 8514   | 2 | 1011.00 | 13.89  |
| Q7CPE2 ATPB_SALTY ATP synthase subunit beta                  | 20 |                       | QIASLGIYPAVDPLDS                    | 324 | 16 | 0  | 5.81   |                                                         | 1658.85 | 80.354  | 3713   | 3 | 553.62  | -9.79  |
| P66313 RL6_SALTY 50S ribosomal protein L6                    | 1  |                       | APVVVPAGVDVK                        | 6   | 12 | 18 | 140.07 | b2b3b4b5y1y2y3y4y5°y5y6°y6y7°y7y8y9y10y12               | 1150.67 | 53.245  | 152451 | 2 | 575.84  | -8.81  |
| P66313 RL6_SALTY 50S ribosomal protein L6                    | 2  |                       | YADEVVR                             | 163 | 7  | 5  | 50.24  | b6y3y4y5y7                                              | 851.42  | 30.641  | 108357 | 2 | 426.21  | -10.32 |
| P66313 RL6_SALTY 50S ribosomal protein L6                    | 3  |                       | ALLNSMVIGVTEGFTK                    | 69  | 16 | 6  | 25.31  | y1y6y8y9°y9y16                                          | 1679.91 | 94.760  | 89044  | 2 | 840.46  | 1.53   |
| P66313 RL6_SALTY 50S ribosomal protein L6                    | 4  |                       | DGYADGWAQAGTAR                      | 55  | 14 | 13 | 72.13  | b3y1y4y6y7°y7°y7y9y10*y10y11°y11y14                     | 1438.64 | 49.506  | 87822  | 2 | 719.82  | 0.76   |
| P66313 RL6_SALTY 50S ribosomal protein L6                    | 5  |                       | INGQVITIK                           | 18  | 9  | 10 | 45.05  | b2*b2b3y1y2y3y7y8*y8y9                                  | 985.60  | 48.453  | 84522  | 2 | 493.30  | -7.99  |
| P66313 RL6_SALTY 50S ribosomal protein L6                    | 6  | Carbamidomethyl+C(26) | GNVVNLSLGFSHPDHQLPAGIT AECTPTQEIVLK | 99  | 35 | 4  | 22.37  | b3b4y10*y10                                             | 3741.86 | 95.685  | 2953   | 3 | 1247.96 | -17.16 |
| P67904 RS10_SALTY 30S ribosomal protein S10                  | 1  |                       | LIDQSTAEIVETAK                      | 16  | 14 | 20 | 158.66 | b2b3b7°b7b10y3y4y5y7y8y9y10°y10y11*y11y12°y12*y12y13y14 | 1517.81 | 55.311  | 152115 | 2 | 759.41  | 2.65   |
| P67904 RS10_SALTY 30S ribosomal protein S10                  | 2  |                       | LVDIVPETEK                          | 72  | 10 | 8  | 76.73  | b2b3y3y4y6y8y9y10                                       | 1142.62 | 51.703  | 61137  | 2 | 571.81  | -8.76  |
| P67904 RS10_SALTY 30S ribosomal protein S10                  | 3  |                       | RTGAQVR                             | 30  | 7  | 4  | 37.13  | b4b5y6*y6                                               | 787.45  | 36.384  | 163759 | 2 | 394.23  | -7.36  |
| P67904 RS10_SALTY 30S ribosomal protein S10                  | 4  |                       | RLVDIVPETEK                         | 71  | 11 | 5  | 65     | b3b4b5b6b10                                             | 1298.72 | 52.053  | 70905  | 2 | 649.87  | -6.02  |
| P67904 RS10_SALTY 30S ribosomal protein S10                  | 5  |                       | AFDHRLIDQSTAEIVETAK                 | 11  | 19 | 5  | 20.39  | b6b9y9y14*y14                                           | 2144.07 | 97.859  | 2615   | 3 | 715.36  | -14.57 |
| P0A1A5 ILVE_SALTY Branched-chain-amino-acid aminotransferase | 1  |                       | SVDGIQVGEGR                         | 266 | 11 | 6  | 36.34  | b3y4y5y9°y9y11                                          | 1116.56 | 41.151  | 28295  | 2 | 558.79  | -0.44  |
| P0A1A5 ILVE_SALTY Branched-chain-amino-acid aminotransferase | 2  |                       | AAPNTIPTAAK                         | 149 | 11 | 9  | 84.13  | b1y2y3y4y5y7y8y9y11                                     | 1054.58 | 31.909  | 25827  | 2 | 527.79  | -7.41  |
| P0A1A5 ILVE_SALTY Branched-chain-amino-acid aminotransferase | 3  |                       | AGGNYLSSLLVGSEAR                    | 160 | 16 | 7  | 41.52  | b3b5b6y2y3y4y16                                         | 1593.82 | 79.409  | 19766  | 2 | 797.42  | -0.15  |
| P0A1A5 ILVE_SALTY Branched-chain-amino-acid aminotransferase | 4  |                       | IQQAFFGLTGETEDK                     | 284 | 16 | 12 | 59.28  | b2b3b5°b5b7°b7b14*b14y8y10°y10y11                       | 1830.90 | 93.667  | 13404  | 2 | 915.95  | 2.80   |

|                                                               |    |                                       |                               |     |    |    |        |                                               |         |         |        |   |         |        |
|---------------------------------------------------------------|----|---------------------------------------|-------------------------------|-----|----|----|--------|-----------------------------------------------|---------|---------|--------|---|---------|--------|
| [P0A1A5 ILVE_SALTY Branched-chain-amino-acid aminotransferase | 5  |                                       | VHVMShALHYGTSVFEGIR           | 22  | 19 | 4  | 23.34  | b14y7y9y11                                    | 2140.08 | 78.743  | 1689   | 3 | 714.03  | 0.46   |
| [P0A1A5 ILVE_SALTY Branched-chain-amino-acid aminotransferase | 6  |                                       | ESLYLADeVFMSTAAEITPVR         | 244 | 22 | 6  | 29.09  | b4b7°b7b8b15°b15                              | 2399.18 | 82.569  | 29808  | 3 | 800.40  | 1.93   |
| [P0A1A5 ILVE_SALTY Branched-chain-amino-acid aminotransferase | 7  | Carbamidomethyl+C(14)                 | FPVSQSIDELMEACR               | 69  | 15 | 5  | 25.44  | b5*b5b12y4y9                                  | 1781.85 | 101.758 | 3423   | 2 | 891.43  | 16.17  |
| [P0A1A5 ILVE_SALTY Branched-chain-amino-acid aminotransferase | 8  |                                       | ADYIWfNGEMVR                  | 5   | 12 | 6  | 43.66  | b3b5b6°b6y4y10                                | 1500.71 | 68.511  | 3176   | 3 | 500.91  | 11.63  |
| [P0A1A5 ILVE_SALTY Branched-chain-amino-acid aminotransferase | 9  |                                       | DGVLFTPPFTSSALPGITR           | 204 | 19 | 5  | 28.99  | b4b11b13y3y12                                 | 1976.01 | 99.243  | 2907   | 2 | 988.51  | -17.91 |
| [P0A1A5 ILVE_SALTY Branched-chain-amino-acid aminotransferase | 10 | Carbamidomethyl+C(12)                 | SVDGIQVGEGRCPVTK              | 266 | 17 | 4  | 16.1   | b3y3y10°y10                                   | 1758.86 | 77.580  | 10656  | 3 | 586.96  | -9.72  |
| [P0A1A5 ILVE_SALTY Branched-chain-amino-acid aminotransferase | 11 |                                       | IQQAFFGLFTGETEDKWGWLDPVNS     | 284 | 25 | 6  | 22.85  | b3y3y4y7°y7*y7                                | 2885.38 | 112.303 | 6330   | 3 | 962.46  | -0.34  |
| [P0A1A5 ILVE_SALTY Branched-chain-amino-acid aminotransferase | 12 | Carbamidomethyl+C(14)                 | FPVSQSIDELMEACRDVIR           | 69  | 19 | 4  | 14.74  | b8*b8b13y10                                   | 2265.09 | 103.172 | 2244   | 3 | 755.70  | -3.66  |
| [P0A1A5 ILVE_SALTY Branched-chain-amino-acid aminotransferase | 13 |                                       | WEDAKVHVMShALHYGTSVFEGIR      | 17  | 24 | 3  | 22.85  | b10b12b13                                     | 2769.35 | 74.178  | 1939   | 3 | 923.79  | -1.15  |
| [P0A1A5 ILVE_SALTY Branched-chain-amino-acid aminotransferase | 14 | Phosphoryl STY(12)                    | DGVLFTPPFTSSALPGITR           | 204 | 19 | 3  | 23.92  | b3b10b11                                      | 2056.04 | 75.218  | 1520   | 2 | 1028.52 | 14.49  |
| [P0A1A5 ILVE_SALTY Branched-chain-amino-acid aminotransferase | 15 | Carbamidomethyl+C(14);Oxidation+M(11) | FPVSQSIDELMEACRDVIR           | 69  | 19 | 3  | 14.74  | b5b8y9                                        | 2281.10 | 106.854 | 135288 | 2 | 1141.05 | 0.00   |
| [P0A1A5 ILVE_SALTY Branched-chain-amino-acid aminotransferase | 16 |                                       | PNTIPTAAK                     | 151 | 9  | 1  | 7.81   | b3                                            | 912.50  | 31.934  | 5461   | 2 | 456.75  | -14.65 |
| [P65215 KDSA_SALTY 2-dehydro-3-deoxyphohooctonate aldolase    | 1  |                                       | VITDVHEASQAQPVADVVDVIQLPAFLAR | 91  | 29 | 6  | 25.67  | b7b8b12b21y2y6                                | 3101.67 | 104.697 | 42937  | 3 | 1034.56 | 1.50   |
| [P65215 KDSA_SALTY 2-dehydro-3-deoxyphohooctonate aldolase    | 2  |                                       | VANDLPFVLFGGMNVLERS           | 12  | 19 | 18 | 105.08 | b2b3b4b5°b5b8y2y3°y3y4y7y8*y8y10°y10y13y14y19 | 2078.09 | 110.308 | 21217  | 2 | 1039.55 | 6.46   |
| [P65215 KDSA_SALTY 2-dehydro-3-deoxyphohooctonate aldolase    | 3  |                                       | LGIPYVFK                      | 47  | 8  | 3  | 35.79  | b3y3y5                                        | 936.54  | 76.851  | 12792  | 2 | 468.77  | -14.01 |
| [P65215 KDSA_SALTY 2-dehydro-3-deoxyphohooctonate aldolase    | 4  |                                       | AGMAVGLAGLFLESHPDPANAK        | 226 | 22 | 6  | 28.56  | b3b6y4y12°y12y13                              | 2166.13 | 121.458 | 2854   | 3 | 722.72  | 14.77  |
| [P65215 KDSA_SALTY 2-dehydro-3-deoxyphohooctonate aldolase    | 5  | Carbamidomethyl+C(17)                 | VSGNSPVIFDVTHALQCR            | 189 | 18 | 5  | 26.26  | b4b7b8°b8y3                                   | 2000.03 | 109.425 | 4182   | 2 | 1000.52 | 14.16  |
| [P65215 KDSA_SALTY 2-dehydro-3-deoxyphohooctonate aldolase    | 6  |                                       | GANFGYDNLVVDMLGFSSVMK         | 168 | 20 | 4  | 27.59  | b10b15y10y11                                  | 2177.03 | 102.525 | 1959   | 3 | 726.35  | -4.71  |
| [P65215 KDSA_SALTY 2-dehydro-3-deoxyphohooctonate aldolase    | 7  |                                       | ANRSSIHSYR                    | 60  | 10 | 3  | 26.62  | b4y3y5                                        | 1190.60 | 18.174  | 23940  | 3 | 397.54  | -0.41  |
| [P65215 KDSA_SALTY 2-dehydro-3-deoxyphohooctonate aldolase    | 8  | Carbamidomethyl+C(18)                 | KVSGNSPVIFDVTHALQCR           | 188 | 19 | 3  | 14.74  | b7y9y11                                       | 2128.08 | 84.422  | 5939   | 2 | 1064.54 | -8.26  |
| [P65215 KDSA_SALTY 2-dehydro-3-deoxyphohooctonate aldolase    | 9  |                                       | KPQFVSPGQMGNIVDKFHEGGNDK      | 138 | 24 | 5  | 25.9   | b10b11*b11y10y13                              | 2629.29 | 109.174 | 3370   | 3 | 877.10  | 2.32   |
| [P65215 KDSA_SALTY 2-dehydro-3-deoxyphohooctonate aldolase    | 10 | Oxidation+M(13)                       | VANDLPFVLFGGMNVLERS           | 12  | 19 | 7  | 41.62  | b3b7*b7y7y8y9*y9                              | 2094.05 | 66.643  | 1989   | 3 | 698.69  | -7.11  |
| [P0A1V4 KAD_SALTY Adenylate kinase                            | 1  |                                       | YGIPQISTGDMLR                 | 23  | 13 | 6  | 40.97  | y5y7y8y10*y10y13                              | 1450.74 | 72.828  | 66394  | 2 | 725.87  | 0.76   |
| [P0A1V4 KAD_SALTY Adenylate kinase                            | 2  |                                       | LVEYHQMTAPLIGYYQK             | 167 | 17 | 10 | 76.18  | b8b9y3y4*y4y5y8y11y12*y12                     | 2054.03 | 69.560  | 53646  | 3 | 685.35  | -6.54  |
| [P0A1V4 KAD_SALTY Adenylate kinase                            | 3  |                                       | VDGTQAVADVR                   | 195 | 11 | 8  | 70.33  | b4y2y4y5y8y9y10y11                            | 1130.57 | 36.366  | 52256  | 2 | 565.79  | -6.80  |
| [P0A1V4 KAD_SALTY Adenylate kinase                            | 4  |                                       | NGFLLDGFPR                    | 78  | 10 | 4  | 28.38  | b2b3y4y5                                      | 1135.58 | 81.152  | 35178  | 2 | 568.29  | -8.06  |
| [P0A1V4 KAD_SALTY Adenylate kinase                            | 5  |                                       | GTQAQFIMEK                    | 13  | 10 | 6  | 51.48  | y2y3y4y5y7y10                                 | 1152.58 | 48.506  | 25350  | 2 | 576.79  | 4.24   |
| [P0A1V4 KAD_SALTY Adenylate kinase                            | 6  |                                       | IILLGAPGAGK                   | 2   | 11 | 5  | 41.11  | b2b3y5y6y7                                    | 1009.63 | 61.095  | 25029  | 2 | 505.32  | -7.74  |

|                                                            |    |                      |                                  |     |    |    |        |                                                    |         |         |       |   |         |        |
|------------------------------------------------------------|----|----------------------|----------------------------------|-----|----|----|--------|----------------------------------------------------|---------|---------|-------|---|---------|--------|
| P0A1V4 KAD_SALTY Adenylate kinase                          | 7  |                      | DDVTGEDLTTR                      | 145 | 11 | 3  | 24.02  | b5y6y9                                             | 1221.59 | 78.849  | 1675  | 2 | 611.30  | 21.29  |
| P0A1V4 KAD_SALTY Adenylate kinase                          | 8  |                      | IILLGAPGAGKGTQAQFIMEK            | 2   | 21 | 7  | 44.24  | b3y3y7°y7y13y15y17                                 | 2143.18 | 72.929  | 35317 | 3 | 715.06  | -7.86  |
| P0A1V4 KAD_SALTY Adenylate kinase                          | 9  |                      | VDGTQAVADVRAALEK                 | 195 | 16 | 4  | 24.64  | b7°b7b9b13                                         | 1642.86 | 80.385  | 18438 | 2 | 821.93  | -8.77  |
| P0A1V4 KAD_SALTY Adenylate kinase                          | 10 |                      | GTQAQFIMEKYGIPQISTGDMLR          | 13  | 23 | 4  | 26.25  | b7b8y6y8                                           | 2584.30 | 91.017  | 4055  | 3 | 862.10  | 3.87   |
| P0A1V4 KAD_SALTY Adenylate kinase                          | 11 |                      | NGFLLDGFPRTIPQADAMK              | 78  | 19 | 3  | 21.7   | b6b10b13                                           | 2091.06 | 81.346  | 1989  | 3 | 697.69  | -2.45  |
| P0A1V4 KAD_SALTY Adenylate kinase                          | 12 |                      | EAEAGNTKYAK                      | 184 | 11 | 4  | 24.02  | b4b10y10*y10                                       | 1181.58 | 96.763  | 1884  | 1 | 1181.58 | 4.13   |
| P0A1V4 KAD_SALTY Adenylate kinase                          | 13 | Oxidation+M(7)       | LVEYHQMTAPLIGYYQKEAEAGN<br>TK    | 167 | 25 | 4  | 18.59  | b13y8y10y13                                        | 2870.43 | 97.265  | 14517 | 4 | 718.36  | 9.95   |
| P0A1V4 KAD_SALTY Adenylate kinase                          | 14 | Oxidation+M(8)       | GTQAQFIMEK                       | 13  | 10 | 3  | 28.38  | b7b8y9                                             | 1168.57 | 38.795  | 10201 | 3 | 390.20  | 3.55   |
| P0A1V4 KAD_SALTY Adenylate kinase                          | 15 |                      | LVEYHQMTAPLIGY                   | 167 | 14 | 0  | 4.98   |                                                    | 1634.82 | 69.629  | 2866  | 2 | 817.91  | -4.18  |
| P02910 HISJ_SALTY Histidine-binding<br>periplasmic protein | 1  |                      | VGVLQGTQTETFGNEHWAPK             | 135 | 20 | 13 | 68.72  | b2b3b4b11*b11y2y9y10°y<br>10y11y12y17y20           | 2199.07 | 63.666  | 84601 | 3 | 733.70  | -4.44  |
| P02910 HISJ_SALTY Histidine-binding<br>periplasmic protein | 2  |                      | IGTDPTYAPFESK                    | 29  | 13 | 18 | 158.92 | b4b5°b5b10y3°y3y4y5y6y7<br>y8y9°y9y10°y10y11y12y13 | 1425.69 | 55.175  | 64333 | 2 | 713.35  | 2.83   |
| P02910 HISJ_SALTY Histidine-binding<br>periplasmic protein | 3  |                      | NSDIQPTVASLK                     | 120 | 12 | 17 | 104.83 | b2°b2*b2b3°b3b4*b4b9y3<br>y4y7°y7y8*y8y9y10y12     | 1272.67 | 47.963  | 52178 | 2 | 636.84  | -4.32  |
| P02910 HISJ_SALTY Histidine-binding<br>periplasmic protein | 4  | Carbamidomethyl+C(5) | INTQCTFVENPLDALPSLK              | 62  | 20 | 4  | 14.19  | b16y4y7y20                                         | 2273.20 | 103.813 | 42357 | 2 | 1137.10 | 6.98   |
| P02910 HISJ_SALTY Histidine-binding<br>periplasmic protein | 5  |                      | GIEIVSYQGQDNIYSDLTAGR            | 155 | 21 | 3  | 20.34  | y3y12y17                                           | 2299.16 | 74.606  | 10657 | 3 | 767.06  | 17.63  |
| P02910 HISJ_SALTY Histidine-binding<br>periplasmic protein | 6  |                      | AFAEMR                           | 234 | 6  | 2  | 26.63  | b3y5                                               | 724.34  | 36.445  | 4612  | 1 | 724.34  | -3.29  |
| P02910 HISJ_SALTY Histidine-binding<br>periplasmic protein | 7  |                      | QQEIAFTDKLYAADSR                 | 99  | 16 | 6  | 23.92  | b3b8°b8y7°y7y10                                    | 1855.94 | 99.628  | 33633 | 2 | 928.47  | 9.54   |
| P02910 HISJ_SALTY Histidine-binding<br>periplasmic protein | 8  |                      | IGTDPTYAPFESKNAQGELVGFDI<br>DLAK | 29  | 28 | 4  | 21.82  | b13b14y13*y13                                      | 2996.51 | 96.091  | 25365 | 3 | 999.51  | 5.95   |
| P41031 CY_SALTY Thiosulfate-binding<br>protein             | 1  |                      | VNNPEIMGK                        | 286 | 9  | 7  | 54.08  | b2y2y3y6y7y8y9                                     | 1001.50 | 35.964  | 48487 | 2 | 501.25  | -6.09  |
| P41031 CY_SALTY Thiosulfate-binding<br>protein             | 2  |                      | ELFAALNPPFEQQWAK                 | 37  | 16 | 8  | 34.31  | b7°b7b11y1y6y8y12°y12                              | 1888.97 | 89.970  | 36752 | 2 | 944.99  | 6.27   |
| P41031 CY_SALTY Thiosulfate-binding<br>protein             | 3  |                      | NVEVFDTGGR                       | 189 | 10 | 8  | 90.8   | b3b5b9y4y6y7y8y10                                  | 1093.53 | 47.098  | 32789 | 2 | 547.27  | 3.46   |
| P41031 CY_SALTY Thiosulfate-binding<br>protein             | 4  |                      | FPQTELFR                         | 299 | 8  | 7  | 53.67  | b2b3b6b8*b8y4y6                                    | 1037.56 | 52.386  | 16673 | 2 | 519.28  | 13.53  |
| P41031 CY_SALTY Thiosulfate-binding<br>protein             | 5  |                      | LPNNSSPFYSTMGFLVRK               | 110 | 18 | 4  | 24.29  | b5°b5b10b11                                        | 2058.08 | 70.512  | 4815  | 3 | 686.70  | 14.47  |
| P41031 CY_SALTY Thiosulfate-binding<br>protein             | 6  |                      | LPNNSSPFYSTMGFLVR                | 110 | 17 | 7  | 50.56  | b8y2y5y9y11y12y13                                  | 1929.94 | 92.077  | 4724  | 3 | 643.98  | -6.77  |
| P41031 CY_SALTY Thiosulfate-binding<br>protein             | 7  |                      | ADVVTYNQVTDVQILHDK               | 81  | 18 | 5  | 26.26  | b1b5b10b11y3                                       | 2058.02 | 63.769  | 4527  | 3 | 686.68  | -14.00 |
| P41031 CY_SALTY Thiosulfate-binding<br>protein             | 8  |                      | AYLNWLYSPQAQTIITHYYR             | 265 | 21 | 7  | 35.72  | b4b13y5y6y9°y9y12                                  | 2664.33 | 93.855  | 75585 | 3 | 888.78  | 1.83   |
| P41031 CY_SALTY Thiosulfate-binding<br>protein             | 9  |                      | FGSWPEVMK                        | 311 | 9  | 4  | 37.96  | y3y4y5°y5                                          | 1080.52 | 68.954  | 36450 | 2 | 540.76  | 1.13   |
| P41031 CY_SALTY Thiosulfate-binding<br>protein             | 10 |                      | GATTTFAER                        | 199 | 9  | 5  | 54.08  | y4y5y6°y6y8                                        | 953.46  | 30.752  | 13212 | 2 | 477.24  | -4.80  |
| P41031 CY_SALTY Thiosulfate-binding<br>protein             | 11 |                      | TNILAEFPVAVVDKNVQANGTEK          | 239 | 23 | 7  | 34.81  | b3b4b7y4y6°y6y14                                   | 2544.31 | 91.022  | 86556 | 3 | 848.78  | 1.63   |

|                                             |    |                       |                                          |     |    |    |        |                                                      |         |         |        |   |         |        |
|---------------------------------------------|----|-----------------------|------------------------------------------|-----|----|----|--------|------------------------------------------------------|---------|---------|--------|---|---------|--------|
| P41031 CY_SALTY Thiosulfate-binding protein | 12 |                       | GLGDVLISFESEVNNIRK                       | 208 | 18 | 4  | 24.5   | b4b10b13y8                                           | 1990.05 | 103.334 | 13976  | 3 | 664.02  | -7.12  |
| P41031 CY_SALTY Thiosulfate-binding protein | 13 |                       | TSGNARYTYLAAWGAADNADGG DK                | 153 | 24 | 3  | 22.85  | b4b14b15                                             | 2445.11 | 100.119 | 8023   | 3 | 815.71  | 1.00   |
| P41031 CY_SALTY Thiosulfate-binding protein | 14 |                       | ELFAALNPPFEQQWA                          | 37  | 15 | 2  | 14.24  | y6y14                                                | 1760.85 | 89.898  | 2686   | 3 | 587.62  | -7.97  |
| P0A7K0 RL11_SALTY 50S ribosomal protein L11 | 1  |                       | AQLQEIAQTK                               | 103 | 10 | 18 | 86.03  | b2*b2b3*b3b6y1y2y3*y3*y3y4*y4y5*y5y6y8*y8y10         | 1129.62 | 38.786  | 256934 | 2 | 565.31  | -3.78  |
| P0A7K0 RL11_SALTY 50S ribosomal protein L11 | 2  |                       | TPPAAVLLK                                | 72  | 9  | 8  | 54.08  | b1b2y1y3y5y6y7y9                                     | 909.57  | 54.420  | 129953 | 2 | 455.29  | -12.82 |
| P0A7K0 RL11_SALTY 50S ribosomal protein L11 | 3  |                       | AADMTGADIEAMTR                           | 113 | 14 | 3  | 19.04  | b4y8y12                                              | 1452.64 | 57.263  | 2346   | 1 | 1452.64 | -5.88  |
| P0A7K0 RL11_SALTY 50S ribosomal protein L11 | 4  |                       | AQLQEIAQTKAADMTGADIEAMT R                | 103 | 24 | 3  | 12.56  | b3y5y8                                               | 2563.26 | 74.232  | 3722   | 3 | 855.09  | 2.95   |
| P0A7K0 RL11_SALTY 50S ribosomal protein L11 | 5  |                       | QLQEIAQTK                                | 104 | 9  | 2  | 8.19   | b8*b8                                                | 1058.58 | 38.800  | 5195   | 2 | 529.79  | -6.00  |
| P0A7K0 RL11_SALTY 50S ribosomal protein L11 | 6  |                       | AQLQEIAQTK                               | 103 | 10 | 0  | 2.07   |                                                      | 1112.59 | 38.826  | 1928   | 3 | 371.54  | 3.95   |
| P66032 RIBB_SALTY 3                         | 1  |                       | MNQTLSSFGTPFER                           | 0   | 15 | 10 | 88.2   | b4y3y4y6y7y8y9y10*y10y15                             | 1727.86 | 84.795  | 60639  | 2 | 864.43  | 8.55   |
| P66032 RIBB_SALTY 3                         | 2  |                       | AQAGGVLTR                                | 141 | 9  | 4  | 30.18  | b3b7y7y9                                             | 872.49  | 29.265  | 34938  | 2 | 436.75  | -7.83  |
| P66032 RIBB_SALTY 3                         | 3  |                       | VELALDALR                                | 15  | 9  | 3  | 30.18  | b3y4y7                                               | 999.57  | 69.271  | 37433  | 2 | 500.29  | -8.43  |
| P66032 RIBB_SALTY 3                         | 4  |                       | DGAKPSDLNRPGHVFPLR                       | 123 | 18 | 4  | 32.25  | b7b8b11b14                                           | 1976.04 | 92.813  | 5778   | 2 | 988.52  | -3.58  |
| P66032 RIBB_SALTY 3                         | 5  |                       | NQTLSSFGTPFER                            | 1   | 14 | 3  | 19.04  | b11b13y13                                            | 1596.83 | 65.159  | 4611   | 2 | 798.92  | 20.18  |
| P66032 RIBB_SALTY 3                         | 6  | Carbamidomethyl+C(4)  | APECIAFAGQHNMNAVVTIEDLVA YR              | 184 | 25 | 3  | 21.81  | b10b11y8                                             | 2775.42 | 101.728 | 3206   | 3 | 925.81  | 20.76  |
| P66032 RIBB_SALTY 3                         | 7  |                       | KQLDLPMMVENNTSAYGTGFTV TIEAAEGVTTGVSAADR | 75  | 39 | 3  | 10.88  | b12b15y6                                             | 4044.98 | 106.935 | 7556   | 4 | 1012.00 | 6.28   |
| P66032 RIBB_SALTY 3                         | 8  | Oxidation+M(7)        | QLDLPMMVENNTSAYGTGFTVTI EAAEGVTTGVSAADR  | 76  | 38 | 5  | 14.4   | b6y3*y3y12y15                                        | 3932.91 | 108.207 | 1976   | 3 | 1311.64 | 14.15  |
| P68684 RS21_SALTY 30S ribosomal protein S21 | 1  |                       | ENEPFDVALR                               | 7   | 10 | 7  | 51.48  | b2y2y4y5y6y7y10                                      | 1189.58 | 63.460  | 79551  | 2 | 595.30  | -1.03  |
| P68684 RS21_SALTY 30S ribosomal protein S21 | 2  |                       | AGVLAEVR                                 | 25  | 8  | 6  | 48.89  | b6y2y4y5y7y8                                         | 814.47  | 44.134  | 41928  | 2 | 407.74  | -13.34 |
| P68684 RS21_SALTY 30S ribosomal protein S21 | 3  |                       | VRENEPFDVALR                             | 5   | 12 | 5  | 33.86  | b3b5b6y9y12                                          | 1444.74 | 47.562  | 36049  | 2 | 722.87  | -11.91 |
| P68684 RS21_SALTY 30S ribosomal protein S21 | 4  |                       | EFYEKPTTER                               | 35  | 10 | 4  | 28.38  | b5*b5b6y3                                            | 1299.62 | 73.086  | 5404   | 3 | 433.88  | -3.95  |
| P0A297 RL10_SALTY 50S ribosomal protein L10 | 1  |                       | LATLPTYEEAIAR                            | 125 | 13 | 14 | 96.12  | b2b3*b3b13y1y4y5y7y8y9° y9y10y11y13                  | 1447.77 | 65.028  | 136965 | 2 | 724.39  | -5.56  |
| P0A297 RL10_SALTY 50S ribosomal protein L10 | 2  |                       | AAAFEGELIPASQIDR                         | 109 | 16 | 20 | 128.78 | b1b5b8*b8b9b13°b13y2y3° y3y5*y5y7y8*y8y9y10y11y12y16 | 1687.87 | 68.622  | 90702  | 2 | 844.44  | 4.48   |
| P0A297 RL10_SALTY 50S ribosomal protein L10 | 3  | Carbamidomethyl+C(9)  | VVEGTQFECLKDFTVGP TLIAYSM EHPGAAAR       | 62  | 32 | 6  | 24.58  | b8y6y7y10y16y32                                      | 3494.69 | 92.371  | 47741  | 4 | 874.43  | -5.24  |
| P0A297 RL10_SALTY 50S ribosomal protein L10 | 4  |                       | DFTVGP TLIAYSMEHPGAAAR                   | 73  | 21 | 7  | 29.35  | b3°b3b5b6°b6y6y10                                    | 2204.10 | 82.631  | 10792  | 3 | 735.37  | 10.63  |
| P0A297 RL10_SALTY 50S ribosomal protein L10 | 5  | Carbamidomethyl+C(9)  | VVEGTQFECLK                              | 62  | 11 | 3  | 27.03  | b3b4y4                                               | 1309.66 | 66.133  | 8053   | 2 | 655.33  | 10.07  |
| P0A297 RL10_SALTY 50S ribosomal protein L10 | 6  |                       | LMATMK                                   | 138 | 6  | 1  | 13.52  | y5                                                   | 694.35  | 38.800  | 3482   | 1 | 694.35  | -14.42 |
| P0A297 RL10_SALTY 50S ribosomal protein L10 | 7  |                       | AAAFEGELIPASQIDRLATLPTYEE AIAR           | 109 | 29 | 5  | 25.67  | b10y4y8y9y21                                         | 3116.63 | 92.949  | 44267  | 3 | 1039.55 | 1.02   |
| P0A297 RL10_SALTY 50S ribosomal protein L10 | 8  | Carbamidomethyl+C(9)  | VVEGTQFECLKDFTVGP TLIAYSM EHPGAAAR       | 62  | 32 | 4  | 22.05  | b7y8y9°y9                                            | 3494.69 | 63.678  | 13307  | 4 | 874.43  | -6.01  |
| P0A297 RL10_SALTY 50S ribosomal protein L10 | 9  | Carbamidomethyl+C(10) | RVVEGTQFECLK                             | 61  | 12 | 3  | 22.01  | b9y6y11                                              | 1465.76 | 70.505  | 2556   | 2 | 733.38  | 9.08   |

|                                              |    |                       |                                  |     |    |    |       |                                           |         |         |       |   |         |        |
|----------------------------------------------|----|-----------------------|----------------------------------|-----|----|----|-------|-------------------------------------------|---------|---------|-------|---|---------|--------|
| [P0A297]RL10_SALTY 50S ribosomal protein L10 | 10 |                       | AGREAGVYMR                       | 43  | 10 | 4  | 40.69 | b4b9y5y6                                  | 1109.54 | 62.841  | 1872  | 2 | 555.28  | -6.93  |
| [P0A297]RL10_SALTY 50S ribosomal protein L10 | 11 | Oxidation+M(13)       | DTFVGPTLIAYSMEHPGAAAR            | 73  | 21 | 4  | 13.7  | b7°b7b12y10                               | 2220.09 | 115.610 | 5495  | 3 | 740.70  | 6.27   |
| [P0A297]RL10_SALTY 50S ribosomal protein L10 | 12 | Oxidation+M(2)        | LMATMKEASAGK                     | 138 | 12 | 4  | 35.78 | b6b7y8y10                                 | 1253.62 | 80.894  | 1688  | 2 | 627.31  | -2.43  |
| [P02936]OMPA_SALTY Outer membrane protein A  | 1  | Carbamidomethyl+C(6)  | AALIDCLAPDR                      | 321 | 11 | 11 | 75.65 | b2b3b4b6y1y3y6y7y8°y8y11                  | 1214.63 | 61.910  | 47101 | 2 | 607.82  | 4.92   |
| [P02936]OMPA_SALTY Outer membrane protein A  | 2  | Carbamidomethyl+C(13) | GMGESNPVTGNTCDNVKPR              | 302 | 19 | 9  | 32.93 | b3y1y2y10y11y13°y13y17y19                 | 2032.90 | 37.569  | 44070 | 3 | 678.31  | -8.29  |
| [P02936]OMPA_SALTY Outer membrane protein A  | 3  |                       | LEYQWTNNIGDANTIGTRPDNGL LSVGVSYR | 163 | 31 | 5  | 18.48 | b6b11y3y5y12                              | 3423.64 | 111.530 | 2183  | 4 | 856.67  | -14.48 |
| [P02936]OMPA_SALTY Outer membrane protein A  | 4  |                       | DGSVVVLGFTDR                     | 255 | 12 | 4  | 22.01 | b4b6y3°y3                                 | 1264.65 | 97.945  | 33412 | 2 | 632.83  | -0.39  |
| [P0A1H3]EFG_SALTY Elongation factor G        | 1  |                       | IATDPFVGNLTFFR                   | 323 | 14 | 15 | 86.32 | b2b4°b4b11y2y3y4y7*y7y10y11*y11y13*y13y14 | 1597.84 | 93.410  | 88063 | 2 | 799.42  | 3.13   |
| [P0A1H3]EFG_SALTY Elongation factor G        | 2  |                       | VYSGVVNSGDTVLSNVK                | 337 | 17 | 12 | 83.17 | b2b4b5b7y4y9y10y11*y11y12y15y17           | 1737.91 | 62.105  | 74352 | 2 | 869.46  | 4.00   |
| [P0A1H3]EFG_SALTY Elongation factor G        | 3  |                       | SGPLAGYPVVDLGVR                  | 562 | 15 | 10 | 36.63 | b2b5°b5b7y1y2y4y8y10y15                   | 1499.82 | 76.626  | 69912 | 2 | 750.42  | 1.30   |
| [P0A1H3]EFG_SALTY Elongation factor G        | 4  |                       | EFNVEANVGKPVAYR                  | 475 | 16 | 4  | 16.93 | b11y6*y6y8                                | 1820.91 | 53.554  | 35195 | 3 | 607.64  | -9.99  |
| [P0A1H3]EFG_SALTY Elongation factor G        | 5  | Carbamidomethyl+C(20) | AGDIAAAIGLKDVTGDTLCDPEN PIILER   | 378 | 30 | 4  | 11.3  | b26y2y3y11                                | 3138.61 | 85.242  | 25140 | 3 | 1046.88 | 3.97   |
| [P0A1H3]EFG_SALTY Elongation factor G        | 6  |                       | GQYGHVVIDMYPLEPGSNPK             | 512 | 20 | 4  | 30.45 | y6y8y9y13                                 | 2201.06 | 70.661  | 22504 | 3 | 734.36  | -2.44  |
| [P0A1H3]EFG_SALTY Elongation factor G        | 7  | Carbamidomethyl+C(11) | VLNNEILVTCGSAFK                  | 255 | 16 | 6  | 23.46 | b5*b5y1y8y9°y9                            | 1777.98 | 108.259 | 16850 | 3 | 593.33  | 13.46  |
| [P0A1H3]EFG_SALTY Elongation factor G        | 8  |                       | YDDAPNNVAQVIEAR                  | 686 | 16 | 4  | 16.93 | b5b12y8y16                                | 1745.82 | 73.177  | 14954 | 2 | 873.41  | -13.15 |
| [P0A1H3]EFG_SALTY Elongation factor G        | 9  |                       | VEVETPEENTGDVIGDLR               | 618 | 19 | 9  | 32.93 | b2°b2b3b7b14b15°b15y9y19                  | 2058.96 | 94.802  | 9507  | 3 | 686.99  | -12.45 |
| [P0A1H3]EFG_SALTY Elongation factor G        | 10 |                       | MEFPEPVISIAVEPK                  | 408 | 15 | 3  | 25.98 | b7b8b11                                   | 1685.88 | 83.012  | 8327  | 2 | 843.44  | -2.61  |
| [P0A1H3]EFG_SALTY Elongation factor G        | 11 |                       | YLGGEELTEEEIK                    | 236 | 13 | 4  | 20.38 | b4b9b13y5                                 | 1509.75 | 89.770  | 5185  | 2 | 755.38  | 14.63  |
| [P0A1H3]EFG_SALTY Elongation factor G        | 12 | Carbamidomethyl+C(10) | VLDGAVMVYCAVGGVQPQSETV WR        | 104 | 24 | 6  | 12.56 | b2b7y2y6y13y24                            | 2621.26 | 111.331 | 1643  | 3 | 874.43  | -9.31  |
| [P0A1H3]EFG_SALTY Elongation factor G        | 13 |                       | VVGQIK                           | 153 | 6  | 1  | 13.52 | b4                                        | 643.41  | 45.091  | 18699 | 1 | 643.41  | -6.17  |
| [P0A1H3]EFG_SALTY Elongation factor G        | 14 |                       | IHAEVPLSEMFYATQLR                | 653 | 18 | 3  | 15.37 | b9b12y6                                   | 2062.04 | 65.040  | 15344 | 3 | 688.02  | -1.54  |
| [P0A1H3]EFG_SALTY Elongation factor G        | 15 |                       | IGEVHDGAATMDWMEQEQR              | 39  | 20 | 4  | 14.19 | b11y3*y3y10                               | 2332.02 | 73.137  | 11555 | 3 | 778.01  | 10.57  |
| [P0A1H3]EFG_SALTY Elongation factor G        | 16 |                       | GGVIPGEYIPAVDK                   | 541 | 14 | 3  | 19.04 | b4b6y8                                    | 1414.78 | 71.995  | 6224  | 2 | 707.89  | 16.14  |
| [P0A1H3]EFG_SALTY Elongation factor G        | 17 |                       | LHFGSYHDVDSSELAFK                | 577 | 17 | 3  | 16.1  | b3y6y9                                    | 1951.94 | 44.991  | 4468  | 2 | 976.47  | 11.69  |
| [P0A1H3]EFG_SALTY Elongation factor G        | 18 |                       | GGVIPGEYIPAVDKIGIEQLK            | 541 | 21 | 3  | 20.34 | b3b8b10                                   | 2211.18 | 74.508  | 13993 | 3 | 737.73  | -9.94  |
| [P0A1H3]EFG_SALTY Elongation factor G        | 19 | Carbamidomethyl+C(20) | AGDIAAAIGLKDVTGDTLCDPEN PIILER   | 378 | 30 | 4  | 11.3  | b6b22y11°y11                              | 3138.58 | 92.898  | 13142 | 4 | 785.40  | -6.30  |
| [P0A1H3]EFG_SALTY Elongation factor G        | 20 |                       | GITITSAAATAFWSGMAKQYEPHR         | 59  | 24 | 4  | 22.85 | y4y6y7*y7                                 | 2624.29 | 76.295  | 9925  | 3 | 875.43  | -1.86  |
| [P0A1H3]EFG_SALTY Elongation factor G        | 21 | Carbamidomethyl+C(13) | SMRVLDGAVMVYCAVGGVQPQS ETVWR     | 101 | 27 | 3  | 11.8  | b8y3y12                                   | 2995.50 | 85.785  | 9069  | 3 | 999.17  | 14.67  |
| [P0A1H3]EFG_SALTY Elongation factor G        | 22 |                       | IHAEVPLSEMFYATQLRSLTK            | 653 | 22 | 3  | 23.15 | b9b10b12                                  | 2491.30 | 125.996 | 2485  | 3 | 831.10  | -0.69  |

|                                             |    |                                          |                                     |     |    |    |        |                                          |         |         |        |   |         |        |
|---------------------------------------------|----|------------------------------------------|-------------------------------------|-----|----|----|--------|------------------------------------------|---------|---------|--------|---|---------|--------|
| P0A1H3 EFG_SALTY Elongation factor G        | 23 | Carbamidomethyl+C(10)<br>;Oxidation+M(7) | VLDGAVMVYCAVGGVQPQSETV<br>WR        | 104 | 24 | 9  | 57.03  | b12b13b16y6y9y10°y10y1<br>ly22           | 2637.27 | 94.866  | 135666 | 3 | 879.76  | -2.50  |
| P0A1H3 EFG_SALTY Elongation factor G        | 24 |                                          | EANVGKPKQVAYR                       | 479 | 12 | 0  | 4.56   |                                          | 1331.69 | 53.523  | 1739   | 2 | 666.35  | -14.48 |
| P00924 ENO1_YEAST Enolase 1                 | 1  |                                          | NVNDVIAPAFVK                        | 67  | 12 | 14 | 76.86  | b2b4b5°b5°b5b6°b6y2y5y<br>7y9y10°y10y12  | 1286.71 | 66.115  | 108839 | 2 | 643.86  | -3.61  |
| P00924 ENO1_YEAST Enolase 1                 | 2  |                                          | VNQIGTLESIK                         | 346 | 12 | 15 | 107.84 | b1b2°b2b3b5b9y1y2y3y5y<br>6y8y9y10y12    | 1288.71 | 54.334  | 67172  | 2 | 644.86  | -1.04  |
| P00924 ENO1_YEAST Enolase 1                 | 3  |                                          | TAGIQIVADDLTVTNPK                   | 312 | 17 | 4  | 23.5   | y4y10y12y17                              | 1755.96 | 72.397  | 29479  | 2 | 878.48  | 3.55   |
| P00924 ENO1_YEAST Enolase 1                 | 4  |                                          | IEEELGDNAVFAGENFHHGDK               | 415 | 21 | 3  | 22.15  | b4b5y7                                   | 2328.04 | 58.035  | 12277  | 4 | 582.77  | -6.08  |
| P00924 ENO1_YEAST Enolase 1                 | 5  |                                          | TFAEALR                             | 178 | 7  | 3  | 40.15  | b3b5y3                                   | 807.43  | 38.783  | 121060 | 2 | 404.22  | -4.23  |
| P00924 ENO1_YEAST Enolase 1                 | 6  |                                          | AADALLK                             | 338 | 8  | 3  | 40.56  | y4y5y6                                   | 814.49  | 53.920  | 65912  | 2 | 407.75  | -16.41 |
| P00924 ENO1_YEAST Enolase 1                 | 7  |                                          | GNPTVEVELTTEK                       | 15  | 13 | 3  | 20.38  | b12y7y12                                 | 1416.71 | 62.811  | 50591  | 2 | 708.86  | -6.89  |
| P00924 ENO1_YEAST Enolase 1                 | 8  |                                          | SGETEDTFIADLVVGLR                   | 375 | 17 | 4  | 23.09  | b14°b14b15y12                            | 1821.90 | 77.638  | 10909  | 2 | 911.45  | -15.21 |
| P00924 ENO1_YEAST Enolase 1                 | 9  |                                          | NVPLYK                              | 126 | 6  | 1  | 13.52  | y4                                       | 733.41  | 37.038  | 7545   | 1 | 733.41  | -13.40 |
| P00924 ENO1_YEAST Enolase 1                 | 10 |                                          | AVDDFLISLDGTANK                     | 88  | 15 | 3  | 17.9   | b4b13y9                                  | 1578.77 | 57.219  | 7394   | 2 | 789.89  | -19.56 |
| P00924 ENO1_YEAST Enolase 1                 | 11 |                                          | WLTGPQLADLYHSLMK                    | 272 | 16 | 5  | 30.45  | b5b7°b7y6y7                              | 1872.96 | 82.587  | 5695   | 2 | 936.98  | -6.00  |
| P00924 ENO1_YEAST Enolase 1                 | 12 |                                          | YPIVSIEDPFAEDDWEAWSHFFK             | 289 | 23 | 6  | 24.18  | b11b13y6y8y11°y11                        | 2828.34 | 129.002 | 4264   | 3 | 943.45  | 17.44  |
| P00924 ENO1_YEAST Enolase 1                 | 13 | Oxidation+M(17)                          | SIVPSGASTGVHEALEMRDGDK              | 32  | 22 | 4  | 17.89  | b9b11y4y9                                | 2272.10 | 63.032  | 32925  | 3 | 758.04  | 5.59   |
| Q56073 DNAK_SALTY Chaperone<br>protein dnaK | 1  |                                          | IINEPTAAALAYGLDKEVGNR               | 167 | 21 | 14 | 100.09 | b4b7y1y6y7°y7y9y10y11y<br>12y14y17y19y21 | 2215.16 | 74.946  | 56014  | 3 | 739.06  | -4.63  |
| Q56073 DNAK_SALTY Chaperone<br>protein dnaK | 2  |                                          | MAPPQISAEVLKK                       | 109 | 13 | 5  | 20.38  | b8°b8y3y11y13                            | 1411.78 | 56.039  | 44678  | 3 | 471.26  | -12.45 |
| Q56073 DNAK_SALTY Chaperone<br>protein dnaK | 3  |                                          | ASSGLNEEEIQK                        | 502 | 12 | 8  | 68.43  | y1y3y5y7y9y10°y10y12                     | 1304.63 | 34.424  | 27978  | 2 | 652.82  | -5.80  |
| Q56073 DNAK_SALTY Chaperone<br>protein dnaK | 4  |                                          | SLGQFNLDGINPAPR                     | 452 | 15 | 14 | 89.84  | b2°b2b4°b4b11b12°b12y1<br>y4y5y7y8y10y13 | 1598.83 | 71.966  | 27219  | 2 | 799.92  | 3.28   |
| Q56073 DNAK_SALTY Chaperone<br>protein dnaK | 5  |                                          | MQELAQVSQK                          | 587 | 10 | 7  | 47.51  | b2b3y3y6y8°y8y10                         | 1161.59 | 36.970  | 27166  | 2 | 581.30  | -5.36  |
| Q56073 DNAK_SALTY Chaperone<br>protein dnaK | 6  |                                          | QAVTNPQNTLFAIK                      | 56  | 14 | 4  | 34.6   | y9y10y11y14                              | 1544.85 | 67.323  | 24747  | 2 | 772.93  | 2.37   |
| Q56073 DNAK_SALTY Chaperone<br>protein dnaK | 7  |                                          | MAPPQISAEVLK                        | 109 | 12 | 6  | 44.53  | b5b9b10°b10b11y12                        | 1283.70 | 91.177  | 16186  | 2 | 642.35  | -1.14  |
| Q56073 DNAK_SALTY Chaperone<br>protein dnaK | 8  |                                          | TAEDYLGEVPVTEAVITVPAYFNDA<br>QR     | 125 | 26 | 11 | 29.7   | b2b13b16y5°y5y8y12°y12<br>y14°y14y26     | 2869.39 | 93.462  | 12290  | 2 | 1435.20 | 0.43   |
| Q56073 DNAK_SALTY Chaperone<br>protein dnaK | 9  |                                          | GMPQIEVTFDIDADGILHVS AK             | 467 | 22 | 3  | 19.79  | b5b8b14                                  | 2356.13 | 94.762  | 12950  | 4 | 589.79  | -21.66 |
| Q56073 DNAK_SALTY Chaperone<br>protein dnaK | 10 |                                          | TIAVYDLGGGTFDISIIEIDEVDGE<br>K      | 188 | 26 | 5  | 22.57  | b6y4°y4y11y12                            | 2769.41 | 76.427  | 4529   | 3 | 923.81  | 14.81  |
| Q56073 DNAK_SALTY Chaperone<br>protein dnaK | 11 |                                          | VLENAEGDR                           | 25  | 9  | 4  | 45.05  | b3y4y5y6                                 | 1002.50 | 116.993 | 3353   | 1 | 1002.50 | 11.51  |
| Q56073 DNAK_SALTY Chaperone<br>protein dnaK | 12 |                                          | MPMVQK                              | 345 | 6  | 1  | 13.52  | b4                                       | 733.38  | 26.516  | 3229   | 2 | 367.19  | 5.58   |
| Q56073 DNAK_SALTY Chaperone<br>protein dnaK | 13 |                                          | LMEIAQQQHAQQAGSADASAN<br>NAK        | 597 | 25 | 3  | 12.27  | b10y8y11                                 | 2610.21 | 38.118  | 1568   | 3 | 870.74  | -9.07  |
| Q56073 DNAK_SALTY Chaperone<br>protein dnaK | 14 |                                          | TAEDYLGEVPVTEAVITVPAYFNDA<br>QRQATK | 125 | 30 | 4  | 22.65  | y9y10°y10y13                             | 3297.58 | 99.185  | 14060  | 3 | 1099.87 | -13.18 |
| Q56073 DNAK_SALTY Chaperone<br>protein dnaK | 15 |                                          | VLENAEGDRTPSIIAYTQDGETL<br>VGQPAK   | 25  | 30 | 7  | 29.48  | b6b8b10°b10y10y12y13                     | 3173.59 | 70.537  | 4713   | 3 | 1058.53 | -2.85  |
| Q56073 DNAK_SALTY Chaperone<br>protein dnaK | 16 |                                          | DDDVDAEFEEVKDK                      | 622 | 15 | 4  | 25.98  | y8y9y12°y12                              | 1752.77 | 78.635  | 3613   | 3 | 584.93  | -5.99  |
| Q56073 DNAK_SALTY Chaperone<br>protein dnaK | 17 | Phosphoryl.STY(7)                        | MAPPQISAEVLK                        | 109 | 12 | 3  | 22.01  | b4b6y6                                   | 1363.65 | 113.193 | 2080   | 2 | 682.33  | -10.56 |
| Q56073 DNAK_SALTY Chaperone<br>protein dnaK | 18 | Oxidation+M(13)                          | FQDEEVQRDVSIMPYK                    | 76  | 16 | 6  | 44.01  | b8b9b10y8y13°y13                         | 1999.96 | 101.888 | 62725  | 3 | 667.32  | 7.20   |

|                                                                     |    |                       |                           |     |    |    |       |                                       |         |         |        |   |         |        |
|---------------------------------------------------------------------|----|-----------------------|---------------------------|-----|----|----|-------|---------------------------------------|---------|---------|--------|---|---------|--------|
| [P60446]RL3_SALTY 50S ribosomal protein L3                          | 1  |                       | VTVQSLDVVR                | 169 | 10 | 12 | 73.72 | b2°b2b5y1y2y3y5y6°y6y7y8y10           | 1115.63 | 56.429  | 133349 | 2 | 558.32  | -8.43  |
| [P60446]RL3_SALTY 50S ribosomal protein L3                          | 2  |                       | IFTEDGVSIPTVIEVEANR       | 13  | 20 | 6  | 51.33 | y3y4y5y6y13y20                        | 2188.16 | 88.195  | 129006 | 2 | 1094.58 | 5.69   |
| [P60446]RL3_SALTY 50S ribosomal protein L3                          | 3  | Carbamidomethyl+C(9)  | GGVPGATGCDLIVKPAVK        | 190 | 18 | 5  | 22.53 | b2y4y7y15y18                          | 1738.93 | 54.093  | 39180  | 3 | 580.32  | -11.72 |
| [P60446]RL3_SALTY 50S ribosomal protein L3                          | 4  |                       | AVQVTTGAK                 | 46  | 9  | 7  | 54.08 | b2y3y4y5y7*y7y9                       | 874.49  | 21.557  | 14165  | 2 | 437.75  | -11.52 |
| [P60446]RL3_SALTY 50S ribosomal protein L3                          | 5  |                       | NLLLVK                    | 184 | 6  | 3  | 39.73 | y3y4y5                                | 699.48  | 56.989  | 48279  | 1 | 699.48  | 1.13   |
| [P60446]RL3_SALTY 50S ribosomal protein L3                          | 6  |                       | GLWEFR                    | 77  | 6  | 1  | 13.52 | y5                                    | 807.41  | 61.438  | 12871  | 1 | 807.41  | -11.26 |
| [P60446]RL3_SALTY 50S ribosomal protein L3                          | 7  |                       | VPGSIGQNQTPGK             | 141 | 13 | 3  | 25.15 | b11y7y8                               | 1282.65 | 64.243  | 4076   | 3 | 428.22  | -21.22 |
| [P60446]RL3_SALTY 50S ribosomal protein L3                          | 8  | Carbamidomethyl+C(9)  | GGVPGATGCDLIVKPAVKA       | 190 | 19 | 7  | 59.06 | b6y5y6y7y9y12y16                      | 1809.97 | 56.212  | 142538 | 3 | 603.99  | -11.87 |
| [P60446]RL3_SALTY 50S ribosomal protein L3                          | 9  |                       | IFTEDGVSIPTVIEVEANRVTVQVK | 13  | 25 | 4  | 26.95 | y14y16y18y21                          | 2743.49 | 95.116  | 103841 | 3 | 915.17  | 0.18   |
| [P60446]RL3_SALTY 50S ribosomal protein L3                          | 10 |                       | KMAGQMGNER                | 159 | 10 | 4  | 39.72 | b5y5y8y9                              | 1121.53 | 18.238  | 15268  | 2 | 561.27  | 12.41  |
| [P60446]RL3_SALTY 50S ribosomal protein L3                          | 11 |                       | QVTTGAK                   | 48  | 7  | 0  | 1.66  |                                       | 704.39  | 21.577  | 4556   | 1 | 704.39  | -1.04  |
| [P0A2C7]POTD_SALTY ermidine/putrescine-binding periplasmic protein  | 1  |                       | EGGIFWMDSLAIPANAK         | 249 | 17 | 14 | 51.91 | b3°b3b6°b6b14b17y1y2y5*y5y12y13y15y17 | 1819.91 | 93.704  | 48589  | 2 | 910.46  | 3.22   |
| [P0A2C7]POTD_SALTY ermidine/putrescine-binding periplasmic protein  | 2  |                       | EVAETIGYPTPNLAAR          | 285 | 16 | 7  | 54.41 | b3b7b12y1y8y9y10                      | 1701.89 | 60.784  | 42738  | 2 | 851.45  | 3.66   |
| [P0A2C7]POTD_SALTY ermidine/putrescine-binding periplasmic protein  | 3  |                       | EVFQMALR                  | 170 | 8  | 4  | 32.78 | b7y2y3y4                              | 993.51  | 63.499  | 18318  | 2 | 497.26  | -8.17  |
| [P0A2C7]POTD_SALTY ermidine/putrescine-binding periplasmic protein  | 4  |                       | LGYSGNTTDPK               | 179 | 11 | 5  | 36.34 | b4°b4b8b9y9                           | 1152.53 | 76.167  | 2250   | 3 | 384.85  | -21.39 |
| [P0A2C7]POTD_SALTY ermidine/putrescine-binding periplasmic protein  | 5  |                       | TITSWADLWKPEYK            | 146 | 14 | 5  | 39.35 | b5b9b12y3y12                          | 1737.90 | 101.793 | 1775   | 2 | 869.45  | 6.25   |
| [P0A2C7]POTD_SALTY ermidine/putrescine-binding periplasmic protein  | 6  |                       | DGAYDLVVPSTYYVDK          | 73  | 16 | 4  | 34.34 | b12°b12b13b14                         | 1804.90 | 91.151  | 1728   | 3 | 602.30  | 17.86  |
| [P0A2C7]POTD_SALTY ermidine/putrescine-binding periplasmic protein  | 7  |                       | KLGYSGNTTDPK              | 178 | 12 | 4  | 31.8  | b6b11y6y8                             | 1280.66 | 69.943  | 8119   | 2 | 640.83  | 5.91   |
| [P0A2C7]POTD_SALTY ermidine/putrescine-binding periplasmic protein  | 8  |                       | EVAETIGYPTPNLAARK         | 285 | 17 | 4  | 23.5  | b7b9°b9b15                            | 1829.95 | 90.225  | 6661   | 2 | 915.48  | -12.07 |
| [P0A2C7]POTD_SALTY ermidine/putrescine-binding periplasmic protein  | 9  | Oxidation+M(5)        | EVFQMALR                  | 170 | 8  | 3  | 35.79 | b3b6y6                                | 1009.52 | 68.690  | 19633  | 1 | 1009.52 | 3.39   |
| [P0A1R2]HIS6_SALTY Imidazole glycerol phohate synthase subunit hisF | 1  |                       | AYLAGQGVEIR               | 245 | 11 | 6  | 36.34 | b2b3y5y7y8y11                         | 1176.63 | 51.191  | 53435  | 2 | 588.82  | -9.34  |
| [P0A1R2]HIS6_SALTY Imidazole glycerol phohate synthase subunit hisF | 2  | Carbamidomethyl+C(10) | VAEVIDIPFCVAGGIR          | 68  | 16 | 8  | 68.7  | b3b4b5b6y1y7y9y10                     | 1715.92 | 90.841  | 49212  | 2 | 858.46  | 2.99   |
| [P0A1R2]HIS6_SALTY Imidazole glycerol phohate synthase subunit hisF | 3  |                       | VTQWETLDWVQEVQQR          | 153 | 16 | 9  | 63.54 | b3*b3b13y3y4y5y8y9y16                 | 2045.03 | 84.426  | 42415  | 2 | 1023.02 | 8.24   |



|                                                                       |    |                       |                                                       |     |    |    |       |                              |         |         |        |   |         |        |
|-----------------------------------------------------------------------|----|-----------------------|-------------------------------------------------------|-----|----|----|-------|------------------------------|---------|---------|--------|---|---------|--------|
| P0A1R2 HIS6_SALTY Imidazole glycerol<br>phohate synthase subunit hisF | 4  |                       | QIINIGELK                                             | 236 | 9  | 3  | 37.96 | y4y6y7                       | 1027.61 | 65.570  | 32074  | 2 | 514.31  | -9.03  |
| P0A1R2 HIS6_SALTY Imidazole glycerol<br>phohate synthase subunit hisF | 5  | Carbamidomethyl+C(5)  | FGVQCIVVGIDTWFDATGK                                   | 119 | 20 | 4  | 19.46 | b11b13y7y13                  | 2228.11 | 91.514  | 12505  | 3 | 743.38  | 20.27  |
| P0A1R2 HIS6_SALTY Imidazole glycerol<br>phohate synthase subunit hisF | 6  |                       | DADVDGALAASVFHK                                       | 221 | 15 | 4  | 29.09 | b3y7y10y13                   | 1515.73 | 81.396  | 4966   | 2 | 758.37  | -11.44 |
| P0A1R2 HIS6_SALTY Imidazole glycerol<br>phohate synthase subunit hisF | 7  | Carbamidomethyl+C(10) | VAEVIDIPFCVAGGIRSIDDAAK                               | 68  | 23 | 5  | 33.21 | b3b4y4y6y14                  | 2416.26 | 89.682  | 34901  | 3 | 806.09  | 3.33   |
| P0A1R2 HIS6_SALTY Imidazole glycerol<br>phohate synthase subunit hisF | 8  |                       | YHVNQYTGDENRTR                                        | 139 | 14 | 3  | 27.61 | y3y8y13                      | 1752.80 | 71.834  | 10604  | 2 | 876.90  | -2.44  |
| P0A1R2 HIS6_SALTY Imidazole glycerol<br>phohate synthase subunit hisF | 9  |                       | DGQVVKGVQFR                                           | 13  | 11 | 4  | 27.03 | b10y3y4*y4                   | 1232.69 | 47.582  | 6157   | 3 | 411.57  | 13.57  |
| P0A1R2 HIS6_SALTY Imidazole glycerol<br>phohate synthase subunit hisF | 10 |                       | ILSFGADKISINSPALADPTLITR                              | 91  | 24 | 3  | 22.85 | b8b17b18                     | 2513.41 | 136.865 | 5875   | 3 | 838.47  | 4.66   |
| P0A1R2 HIS6_SALTY Imidazole glycerol<br>phohate synthase subunit hisF | 11 | Carbamidomethyl+C(9)  | LADRFGVQCIVVGIDTWFDATG<br>K                           | 115 | 24 | 5  | 16.61 | b6*b6b10y7y14                | 2683.35 | 88.844  | 2240   | 3 | 895.12  | 9.92   |
| P0A1S4 STPA_SALTY DNA-binding<br>protein stpA                         | 1  |                       | ADGINPEELFAMDSAMPR                                    | 66  | 18 | 11 | 73.76 | b2b3b4b9b11y2y3y5y6y7y<br>13 | 1963.91 | 88.992  | 25492  | 2 | 982.46  | 8.70   |
| P0A1S4 STPA_SALTY DNA-binding<br>protein stpA                         | 2  |                       | MNLMLQNLNNIR                                          | 0   | 12 | 6  | 36.87 | b2b5b7b11y7y12               | 1473.77 | 76.447  | 21750  | 2 | 737.39  | 0.25   |
| P0A1S4 STPA_SALTY DNA-binding<br>protein stpA                         | 3  |                       | AMAREFSIDVLEEMLEK                                     | 15  | 17 | 4  | 16.1  | b4y2y6y10                    | 2010.98 | 96.246  | 2434   | 2 | 1005.99 | -4.49  |
| P0A1S4 STPA_SALTY DNA-binding<br>protein stpA                         | 4  |                       | INAFLELMK                                             | 57  | 9  | 4  | 30.18 | b5*b5y5y7                    | 1078.59 | 85.125  | 20967  | 2 | 539.80  | -6.22  |
| P0A1S4 STPA_SALTY DNA-binding<br>protein stpA                         | 5  | Oxidation+M(1)        | MNLMLQNLNNIR                                          | 0   | 12 | 3  | 22.01 | b5b11y3                      | 1489.75 | 54.681  | 22977  | 2 | 745.38  | -4.59  |
| P0A1S4 STPA_SALTY DNA-binding<br>protein stpA                         | 6  | Oxidation+M(14)       | AMAREFSIDVLEEMLEK                                     | 15  | 17 | 7  | 33.56 | b9°b9b12b13y5y8°y8           | 2027.00 | 104.889 | 12486  | 3 | 676.34  | 6.93   |
| P26976 PHON_SALTY Non-ecific acid<br>phohatase                        | 1  |                       | LQTIPAFQK                                             | 215 | 9  | 9  | 45.75 | b2*b2b9y3y5*y5y7*y7y9        | 1045.60 | 55.071  | 116090 | 2 | 523.30  | -4.67  |
| P26976 PHON_SALTY Non-ecific acid<br>phohatase                        | 2  |                       | NLLTMGGYYATASAK                                       | 108 | 15 | 7  | 71.57 | b3b4y8y10y11y12y13           | 1560.78 | 70.149  | 101853 | 2 | 780.89  | 3.28   |
| P26976 PHON_SALTY Non-ecific acid<br>phohatase                        | 3  |                       | YVGAVEFAR                                             | 206 | 9  | 6  | 30.18 | b2b3b9y7y8y9                 | 1011.52 | 51.436  | 75163  | 2 | 506.26  | -8.69  |
| P26976 PHON_SALTY Non-ecific acid<br>phohatase                        | 4  |                       | NLLTMGGYYATASAKK                                      | 108 | 16 | 6  | 16.93 | b1*b1b6y8y12°y12             | 1688.85 | 64.653  | 23959  | 3 | 563.62  | -10.99 |
| P26976 PHON_SALTY Non-ecific acid<br>phohatase                        | 5  | Carbamidomethyl+C(3)  | VICGAHWQSDVDAGR                                       | 191 | 15 | 5  | 43.35 | y3y4y9y10y15                 | 1670.77 | 45.932  | 21042  | 2 | 835.89  | -2.48  |
| P26976 PHON_SALTY Non-ecific acid<br>phohatase                        | 6  | Carbamidomethyl+C(12) | TRPFVLFNHSTCRPEDENTLR                                 | 128 | 21 | 5  | 23.35 | b1y7°y7y11y12                | 2589.26 | 92.588  | 12773  | 2 | 1295.13 | -2.36  |
| P26976 PHON_SALTY Non-ecific acid<br>phohatase                        | 7  |                       | IFSPVVGAK                                             | 85  | 9  | 6  | 67.19 | y3y4y6y7y8°y8                | 917.53  | 51.196  | 105182 | 2 | 459.27  | -15.57 |
| P26976 PHON_SALTY Non-ecific acid<br>phohatase                        | 8  |                       | QAAEDADVSVENIAR                                       | 70  | 15 | 5  | 29.09 | b12y10y11°y11y13             | 1587.76 | 50.362  | 23884  | 2 | 794.39  | 1.23   |
| P26976 PHON_SALTY Non-ecific acid<br>phohatase                        | 9  |                       | YTSAETVQPFFHSPEESVNSQFYLP<br>PPPGNDDPAYR              | 16  | 35 | 4  | 12.7  | b5b8y9y13                    | 3936.79 | 122.167 | 2209   | 3 | 1312.94 | -0.99  |
| P26976 PHON_SALTY Non-ecific acid<br>phohatase                        | 10 |                       | YLVFFLPLIVAKYTSAETVQPPFHSP<br>EESVNSQFYLP PPPGNDDPAYR | 4   | 47 | 4  | 13.66 | b4b10b12y14                  | 5340.61 | 136.538 | 17488  | 4 | 1335.91 | -9.33  |
| P26976 PHON_SALTY Non-ecific acid<br>phohatase                        | 11 |                       | DTPETWNMLKNLLTMGGYYATA<br>SAK                         | 98  | 25 | 6  | 36.18 | b11b12b23y14°y14y15          | 2776.37 | 136.524 | 2110   | 3 | 926.13  | 14.25  |

|                                                               |    |                      |                                        |     |    |    |       |                                |         |         |       |   |         |        |
|---------------------------------------------------------------|----|----------------------|----------------------------------------|-----|----|----|-------|--------------------------------|---------|---------|-------|---|---------|--------|
| [P26976]PHON_SALTY Non-ecific acid phohatase                  | 12 | Phosphoryl STY(4)    | NLLTMGGYYATASAKK                       | 108 | 16 | 3  | 25.31 | y11y12y14                      | 1768.83 | 94.666  | 12317 | 2 | 884.92  | 0.90   |
| [P26976]PHON_SALTY Non-ecific acid phohatase                  | 13 |                      | GAVEFAR                                | 208 | 7  | 1  | 8.74  | b3                             | 749.39  | 51.488  | 4400  | 1 | 749.39  | -9.28  |
| [P26976]PHON_SALTY Non-ecific acid phohatase                  | 14 |                      | YVGAVEFAR                              | 206 | 9  | 0  | 1.66  |                                | 993.50  | 51.464  | 3128  | 1 | 993.50  | -14.19 |
| [P0AA02]NUSG_SALTY Transcription antitermination protein nusG | 1  |                      | TLFEPGEMVR                             | 125 | 10 | 7  | 42.73 | b1°b1b9y6y7y8y10               | 1178.59 | 65.207  | 41370 | 2 | 589.80  | -2.07  |
| [P0AA02]NUSG_SALTY Transcription antitermination protein nusG | 2  |                      | VNDGPFADFNQVVEVDYEK                    | 135 | 20 | 6  | 22.32 | b3y3y5°y5y8y20                 | 2243.04 | 86.271  | 28023 | 2 | 1122.02 | 12.73  |
| [P0AA02]NUSG_SALTY Transcription antitermination protein nusG | 3  |                      | VMGFIGGTSDRPAPISDKEVDAIM NR            | 88  | 26 | 6  | 18.05 | b2b3b9b14y11°y11               | 2776.38 | 103.571 | 3111  | 3 | 926.13  | -0.09  |
| [P0AA02]NUSG_SALTY Transcription antitermination protein nusG | 4  |                      | VMGFIGGTSDRPAPISDK                     | 88  | 18 | 7  | 40.27 | b3b6y4y7y9°y9y10               | 1847.92 | 104.305 | 17232 | 2 | 924.46  | -6.34  |
| [P0AA02]NUSG_SALTY Transcription antitermination protein nusG | 5  |                      | LHNMEELFGEVMVPTEEVVEIR                 | 31  | 22 | 3  | 13.27 | b7b12y7                        | 2600.27 | 68.461  | 5957  | 3 | 867.43  | -3.10  |
| [P0AA02]NUSG_SALTY Transcription antitermination protein nusG | 6  |                      | ATPVELDFSQVEKA                         | 167 | 14 | 11 | 94.26 | b12y3y6y8*y8y9*y9y10°y10y11y12 | 1533.78 | 69.706  | 20237 | 2 | 767.40  | 3.26   |
| [P0AA02]NUSG_SALTY Transcription antitermination protein nusG | 7  |                      | WYVVQAFSGFEGRVATSLR                    | 8   | 19 | 3  | 14.74 | b10b13y14                      | 2173.11 | 82.719  | 9583  | 2 | 1087.06 | -2.70  |
| [P0AA02]NUSG_SALTY Transcription antitermination protein nusG | 8  | Oxidation+M(8)       | TLFEPGEMVR                             | 125 | 10 | 3  | 28.38 | b5b6y8                         | 1194.59 | 82.190  | 2962  | 2 | 597.80  | 4.50   |
| [P06202]OPPA_SALTY Periplasmic oligopeptide-binding protein   | 1  |                      | LADPNTASPYASYLQYGHIANIDD IAGKKPATDLGVK | 125 | 38 | 5  | 24.1  | b10b21y1y3y4                   | 4001.01 | 83.542  | 46276 | 5 | 801.01  | -13.06 |
| [P06202]OPPA_SALTY Periplasmic oligopeptide-binding protein   | 2  |                      | AEQQLDKDSAIVPVYYYVNAR                  | 494 | 21 | 8  | 51.21 | b10b11b12°b12y3y9y10y21        | 2442.23 | 73.102  | 27317 | 3 | 814.75  | -1.40  |
| [P06202]OPPA_SALTY Periplasmic oligopeptide-binding protein   | 3  | Carbamidomethyl+C(4) | AGWCADYNEPTSFLNTMLSDSSN NTAHYK         | 439 | 29 | 4  | 17.4  | y4y7y11y29                     | 3294.43 | 90.193  | 20909 | 3 | 1098.82 | 6.82   |
| [P06202]OPPA_SALTY Periplasmic oligopeptide-binding protein   | 4  |                      | TVINQVTYLPISSEVTDVNR                   | 241 | 20 | 6  | 31.79 | b1b4y5y10y11y14                | 2248.19 | 77.098  | 17430 | 2 | 1124.60 | 3.04   |
| [P06202]OPPA_SALTY Periplasmic oligopeptide-binding protein   | 5  |                      | NQGDLPAYSYTPPYTDGAK                    | 333 | 19 | 6  | 36.77 | b7b8y5y11y14y19                | 2057.96 | 58.834  | 14607 | 2 | 1029.49 | 9.37   |
| [P06202]OPPA_SALTY Periplasmic oligopeptide-binding protein   | 6  |                      | NLGVNVNLENQEWK                         | 410 | 14 | 5  | 19.04 | b6b11°b11*b11y12               | 1656.84 | 66.800  | 10458 | 2 | 828.92  | 3.90   |
| [P06202]OPPA_SALTY Periplasmic oligopeptide-binding protein   | 7  |                      | LADPNTASPYASYLQYGHIANIDD IAGK          | 125 | 29 | 9  | 25.67 | b3°b3b7*b7b8*b8b15*b15y3       | 3091.51 | 132.868 | 10278 | 3 | 1031.18 | -7.19  |
| [P06202]OPPA_SALTY Periplasmic oligopeptide-binding protein   | 8  |                      | ALDDHTFEVTLSEPVPYFYK                   | 163 | 20 | 6  | 45.2  | b10b11y4y9y10y12               | 2371.13 | 58.881  | 10214 | 3 | 791.05  | -7.41  |
| [P06202]OPPA_SALTY Periplasmic oligopeptide-binding protein   | 9  |                      | HQGTFDVAR                              | 430 | 9  | 6  | 45.05 | b4*b4b5b8y8*y8                 | 1030.49 | 94.790  | 4221  | 1 | 1030.49 | -13.50 |

|                                                            |    |                       |                                 |     |    |   |       |                          |         |         |        |   |         |        |
|------------------------------------------------------------|----|-----------------------|---------------------------------|-----|----|---|-------|--------------------------|---------|---------|--------|---|---------|--------|
| P06202 OPPA_SALTY Periplasmic oligopeptide-binding protein | 10 |                       | WSDGTPVTAHDFVYSWQR              | 107 | 18 | 8 | 30.55 | b4b7y4°y4y6y9°y9*y9      | 2152.00 | 86.492  | 3059   | 2 | 1076.50 | 3.52   |
| P06202 OPPA_SALTY Periplasmic oligopeptide-binding protein | 11 |                       | SGEIDMTYNNMPIELFQK              | 263 | 18 | 4 | 15.37 | b4y3*y3y10               | 2130.01 | 136.237 | 2201   | 2 | 1065.51 | 10.89  |
| P06202 OPPA_SALTY Periplasmic oligopeptide-binding protein | 12 |                       | NNGSEVQSLDPHKIEGVESNVSR         | 43  | 24 | 5 | 25.9  | b13b14°b14y6y10          | 2592.26 | 117.327 | 23761  | 3 | 864.76  | -1.04  |
| P06202 OPPA_SALTY Periplasmic oligopeptide-binding protein | 13 |                       | NPQYWDNAKTVINQVTYLPISSEV TDVNR  | 232 | 29 | 3 | 11.44 | b11y5y10                 | 3364.68 | 102.076 | 20786  | 3 | 1122.23 | -1.02  |
| P06202 OPPA_SALTY Periplasmic oligopeptide-binding protein | 14 |                       | FGDKWTQPANIVTNGAYK              | 200 | 18 | 3 | 22.78 | b7y4y5                   | 2010.00 | 64.565  | 7723   | 3 | 670.67  | -1.58  |
| P06202 OPPA_SALTY Periplasmic oligopeptide-binding protein | 15 |                       | SELYAKAEQQLDK                   | 488 | 13 | 3 | 29.62 | b6b9b11                  | 1522.76 | 68.364  | 4621   | 2 | 761.88  | -10.74 |
| Q7CPL7 RL17_SALTY 50S ribosomal protein L17                | 1  |                       | LFNELGPR                        | 78  | 8  | 7 | 65.01 | b7y3y4y6*y6y7y8          | 945.51  | 55.415  | 156622 | 2 | 473.26  | -8.33  |
| Q7CPL7 RL17_SALTY 50S ribosomal protein L17                | 2  |                       | AGDNAPMAYIELVDR                 | 103 | 15 | 8 | 36.63 | b5*b5b13b14y2y5y10y15    | 1634.79 | 79.247  | 57912  | 2 | 817.90  | 3.58   |
| Q7CPL7 RL17_SALTY 50S ribosomal protein L17                | 3  |                       | VVEPLITLAK                      | 46  | 10 | 4 | 33.61 | y3y4y7y10                | 1082.67 | 69.229  | 53635  | 2 | 541.84  | -6.88  |
| Q7CPL7 RL17_SALTY 50S ribosomal protein L17                | 4  |                       | RVVEPLITLAK                     | 45  | 11 | 7 | 84.23 | b4b6b8b9b10y3y7          | 1238.78 | 63.141  | 140700 | 2 | 619.89  | -3.55  |
| P66932 TIG_SALTY Trigger factor                            | 1  |                       | NVALEEQAWEAVLAK                 | 399 | 15 | 8 | 29.09 | b1b2b3b5b7y2y11y15       | 1583.85 | 80.282  | 91733  | 2 | 792.43  | -6.09  |
| P66932 TIG_SALTY Trigger factor                            | 2  |                       | INPAGAPNYVPGEYK                 | 83  | 15 | 8 | 55    | b4y2y5y8y9y11y13y15      | 1589.79 | 50.769  | 22060  | 2 | 795.40  | -2.84  |
| P66932 TIG_SALTY Trigger factor                            | 3  |                       | ANDIDVPSALIDSEIDVLR             | 296 | 19 | 9 | 48.11 | b6°b6b7°b7b10b11y3y13y19 | 2055.07 | 94.671  | 17448  | 2 | 1028.04 | 6.18   |
| P66932 TIG_SALTY Trigger factor                            | 4  |                       | GLIEEMASAYEDPKEVIEFYK           | 368 | 22 | 3 | 23.15 | y4y11y12                 | 2548.18 | 81.643  | 5300   | 3 | 850.06  | -14.66 |
| P66932 TIG_SALTY Trigger factor                            | 5  |                       | NFVDAIK                         | 73  | 8  | 3 | 32.78 | b6y4y5                   | 919.51  | 45.544  | 20299  | 2 | 460.26  | -12.61 |
| P66932 TIG_SALTY Trigger factor                            | 6  |                       | GLIEEMASAYEDPK                  | 368 | 14 | 3 | 24.48 | b13y12y13                | 1552.73 | 136.620 | 9626   | 1 | 1552.73 | 6.45   |
| P66932 TIG_SALTY Trigger factor                            | 7  |                       | AGEEFTIDVTFPEEYHAENLK           | 206 | 21 | 4 | 20.34 | y6*y6y9y12               | 2439.18 | 64.521  | 7063   | 3 | 813.73  | 19.32  |
| P66932 TIG_SALTY Trigger factor                            | 8  |                       | IDGFR                           | 40  | 5  | 1 | 13.11 | y4                       | 607.32  | 28.361  | 4022   | 1 | 607.32  | 6.23   |
| P66932 TIG_SALTY Trigger factor                            | 9  |                       | VTIDFTGSVDGEFEFGGKATDFVL AMGQGR | 163 | 30 | 7 | 23.28 | b10y5y10°y10y12y15*y15   | 3133.50 | 102.651 | 7831   | 4 | 784.13  | 6.54   |
| P66932 TIG_SALTY Trigger factor                            | 10 |                       | GLIEEMASAYEDPKEVIEFYK           | 368 | 22 | 3 | 13.27 | b9y4y12                  | 2548.25 | 75.204  | 6657   | 3 | 850.09  | 11.69  |
| P66932 TIG_SALTY Trigger factor                            | 11 |                       | YGASVRQDVLGDLMSR                | 57  | 16 | 3 | 24.64 | y5y8y10                  | 1766.88 | 71.698  | 2766   | 3 | 589.63  | -1.31  |
| P66932 TIG_SALTY Trigger factor                            | 12 |                       | VKGLIEEMASAYEDPK                | 366 | 16 | 4 | 30.45 | b11b12y7y13              | 1779.86 | 117.267 | 2658   | 2 | 890.43  | -11.66 |
| P66932 TIG_SALTY Trigger factor                            | 13 | Phosphoryl STY(10)    | VEERELPELTEEFIK                 | 239 | 15 | 4 | 17.9  | b4°b4b8y5                | 1940.89 | 43.411  | 3072   | 3 | 647.64  | -11.57 |
| P66932 TIG_SALTY Trigger factor                            | 14 | Phosphoryl STY(4)     | VTITIAADSJETAVK                 | 14  | 15 | 3 | 25.98 | y9y11y12                 | 1611.82 | 78.123  | 2620   | 2 | 806.41  | 2.95   |
| Q9L4T0 LUXS_SALTY S-ribosylhomocysteine lyase              | 1  |                       | TMNTPHGDITVFDLR                 | 23  | 16 | 6 | 27.33 | b12y2y4y6y10°y10         | 1787.85 | 71.691  | 47172  | 3 | 596.62  | -11.95 |
| Q9L4T0 LUXS_SALTY S-ribosylhomocysteine lyase              | 2  | Carbamidomethyl+C(15) | VQDQNQIPELNVYQCGTYQMHSLSAQDIAR  | 113 | 31 | 9 | 31.06 | b2b6y1y4y7y10y17y24y31   | 3635.69 | 75.009  | 26545  | 3 | 1212.57 | 1.07   |

|                                                                      |    |                                                      |                                           |     |    |    |       |                           |         |         |        |   |         |        |
|----------------------------------------------------------------------|----|------------------------------------------------------|-------------------------------------------|-----|----|----|-------|---------------------------|---------|---------|--------|---|---------|--------|
| [Q9L4T0]LUXS_SALTY S-ribosylhomocysteine lyase                       | 3  |                                                      | TGFYMSLIGTPDEQR                           | 84  | 15 | 6  | 29.09 | b3y2y3°y3y10y12           | 1714.82 | 78.706  | 25936  | 2 | 857.92  | 7.40   |
| [Q9L4T0]LUXS_SALTY S-ribosylhomocysteine lyase                       | 4  |                                                      | MQAPAVR                                   | 13  | 7  | 5  | 40.15 | y2y4y5y6y7                | 772.40  | 30.387  | 16029  | 2 | 386.71  | -13.43 |
| [Q9L4T0]LUXS_SALTY S-ribosylhomocysteine lyase                       | 5  |                                                      | GIHTLEHLFAGFMR                            | 51  | 14 | 3  | 19.04 | b7y3y6                    | 1628.87 | 76.219  | 4489   | 2 | 814.94  | 20.83  |
| [Q9L4T0]LUXS_SALTY S-ribosylhomocysteine lyase                       | 6  |                                                      | PLLDSTFAVDHTR                             | 1   | 12 | 4  | 22.01 | b5b10y4°y4                | 1370.72 | 56.431  | 2598   | 3 | 457.58  | 11.93  |
| [Q9L4T0]LUXS_SALTY S-ribosylhomocysteine lyase                       | 7  | Carbamidomethyl+C(18)                                | DHLNGNGVEIIDISPMGCR                       | 65  | 19 | 8  | 31.21 | b4*b4b9y8y10°y10y11°y11   | 2097.02 | 136.351 | 1652   | 2 | 1049.02 | 18.86  |
| [Q9L4T0]LUXS_SALTY S-ribosylhomocysteine lyase                       | 8  |                                                      | EVMPEKGIHTLEHLFAGFMR                      | 45  | 20 | 4  | 22.32 | b18y6y8y12                | 2342.17 | 86.416  | 1811   | 2 | 1171.59 | -2.29  |
| [Q9L4T0]LUXS_SALTY S-ribosylhomocysteine lyase                       | 9  | Carbamidomethyl+C(15)<br>;Oxidation+M(20)            | VQDQNQIPELNVYQCGTYQMHSLS<br>SEAQDIAR      | 113 | 31 | 4  | 25.95 | b3b4b7b26                 | 3651.68 | 104.377 | 6482   | 4 | 913.67  | -1.14  |
| [P05989]ILVC_SALTY Ketol-acid reductoisomerase                       | 1  |                                                      | GFGVPTLIAVHPENDPQGEGMAIA<br>K             | 167 | 25 | 8  | 32.95 | b2b3b4b6y10y14y21y25      | 2548.29 | 77.444  | 43762  | 3 | 850.10  | -0.10  |
| [P05989]ILVC_SALTY Ketol-acid reductoisomerase                       | 2  |                                                      | ANYFNTLNL                                 | 1   | 10 | 7  | 52.04 | b2b3b7y3y6y7y10           | 1225.64 | 68.160  | 21443  | 2 | 613.32  | 2.49   |
| [P05989]ILVC_SALTY Ketol-acid reductoisomerase                       | 3  |                                                      | LIQFGWETITEALK                            | 252 | 14 | 4  | 27.21 | b8b12y3y11                | 1648.89 | 101.779 | 9105   | 2 | 824.95  | -4.66  |
| [P05989]ILVC_SALTY Ketol-acid reductoisomerase                       | 4  |                                                      | DGAALGYSHGFNIVEVGEQIR                     | 123 | 21 | 5  | 22.15 | b13*b13y2y6y7             | 2232.09 | 88.208  | 7961   | 3 | 744.70  | -6.67  |
| [P05989]ILVC_SALTY Ketol-acid reductoisomerase                       | 5  | Carbamidomethyl+C(6)                                 | VVIVGCGAQGLNQGLNMR                        | 39  | 18 | 6  | 21.42 | b8b14*b14y5y11*y11        | 1885.95 | 88.851  | 6543   | 2 | 943.48  | -14.56 |
| [P05989]ILVC_SALTY Ketol-acid reductoisomerase                       | 6  |                                                      | LVAEGTDPAYAEK                             | 239 | 13 | 3  | 25.15 | b11y5y6                   | 1363.66 | 37.579  | 5767   | 2 | 682.33  | -11.55 |
| [P05989]ILVC_SALTY Ketol-acid reductoisomerase                       | 7  |                                                      | EIMAPLFQK                                 | 293 | 9  | 4  | 54.08 | b3b5b6b7                  | 1076.57 | 26.316  | 8847   | 2 | 538.79  | -11.34 |
| [P05989]ILVC_SALTY Ketol-acid reductoisomerase                       | 8  |                                                      | AWAAATGGHR                                | 192 | 10 | 6  | 56.81 | b6b7b8y6°y6y7             | 997.50  | 76.433  | 2551   | 1 | 997.50  | 0.67   |
| [P05989]ILVC_SALTY Ketol-acid reductoisomerase                       | 9  |                                                      | DEFADGASYLQGK                             | 25  | 13 | 3  | 27.86 | y8y9y11                   | 1400.63 | 93.613  | 2418   | 2 | 700.82  | -1.22  |
| [P05989]ILVC_SALTY Ketol-acid reductoisomerase                       | 10 |                                                      | VGTYEELIPQADLVVNLTDPKQHS<br>DVVR          | 88  | 28 | 4  | 26.62 | y11y13y14y20              | 3135.62 | 81.971  | 19816  | 4 | 784.66  | -3.35  |
| [P05989]ILVC_SALTY Ketol-acid reductoisomerase                       | 11 | Carbamidomethyl+C(11)<br>;Carbamidomethyl+C(21)<br>) | SDLMGEQTILCGMLQAGSLLCFD<br>KLVAEGTDPAYAEK | 215 | 37 | 9  | 49.55 | b3b11y6y7y8y10°y10y11°y11 | 4031.91 | 118.071 | 10025  | 3 | 1344.64 | -0.06  |
| [P05989]ILVC_SALTY Ketol-acid reductoisomerase                       | 12 |                                                      | LIQFGWETITEALKQGGITLMMDR                  | 252 | 24 | 5  | 19.19 | b7y6y10°y10y14            | 2751.39 | 129.154 | 1871   | 3 | 917.80  | -11.62 |
| [P05989]ILVC_SALTY Ketol-acid reductoisomerase                       | 13 |                                                      | QGGITLMMDRLSNPAK                          | 266 | 16 | 4  | 23.46 | b13y12*y12y13             | 1731.86 | 86.811  | 1605   | 2 | 866.44  | -13.67 |
| [P05989]ILVC_SALTY Ketol-acid reductoisomerase                       | 14 | Oxidation+M(6)                                       | SVQPLMKDGAALGYSHGFNIVEV<br>GEQIR          | 116 | 28 | 9  | 30.4  | b3°b3b7b11°b11y4°y4y5°y5  | 3031.56 | 132.878 | 143649 | 3 | 1011.19 | 10.95  |
| [P05989]ILVC_SALTY Ketol-acid reductoisomerase                       | 15 | Carbamidomethyl+C(6);<br>Oxidation+M(17)             | VVIVGCGAQGLNQGLNMR                        | 39  | 18 | 4  | 15.37 | b14y6y8*y8                | 1901.98 | 86.434  | 13871  | 2 | 951.49  | 3.47   |
| [P05989]ILVC_SALTY Ketol-acid reductoisomerase                       | 16 |                                                      | LGYSHGFNIVEVGEQIR                         | 127 | 17 | 0  | 6.64  |                           | 1917.95 | 88.191  | 12554  | 2 | 959.48  | -14.13 |
| [P0A2A7]RL30_SALTY 50S ribosomal protein L30                         | 1  |                                                      | ATLLGLGLR                                 | 21  | 9  | 8  | 54.08 | b2°b2y1y3y5y6y7y9         | 913.57  | 74.187  | 130022 | 2 | 457.29  | -10.56 |
| [P0A2A7]RL30_SALTY 50S ribosomal protein L30                         | 2  |                                                      | GMVNAVSMVK                                | 45  | 11 | 8  | 24.02 | b2b7°b7y2y4y8°y8y11       | 1182.60 | 73.365  | 89217  | 2 | 591.80  | -4.85  |
| [P0A2A7]RL30_SALTY 50S ribosomal protein L30                         | 3  |                                                      | ATLLGLGLR                                 | 21  | 9  | 0  | 1.66  |                           | 895.56  | 74.194  | 4826   | 2 | 448.28  | -6.95  |
| [P14146]PHOP_SALTY Virulence transcriptional regulatory protein phoP | 1  |                                                      | SSDVSLPVLVLTAR                            | 68  | 14 | 10 | 59.81 | b1b3°b3y3°y3y4y8y9y10y14  | 1456.84 | 86.778  | 69263  | 2 | 728.92  | 1.09   |

|                                                                     |   |                    |                                       |     |    |    |       |                                                          |         |         |       |   |         |        |
|---------------------------------------------------------------------|---|--------------------|---------------------------------------|-----|----|----|-------|----------------------------------------------------------|---------|---------|-------|---|---------|--------|
| P14146 PHOP_SALTY Virulence transcriptional regulatory protein phoP | 2 |                    | VLVVEDNALLR                           | 3   | 11 | 7  | 55.46 | b1b2b3y6y7y8y9                                           | 1240.72 | 67.562  | 65445 | 2 | 620.86  | -2.85  |
| P14146 PHOP_SALTY Virulence transcriptional regulatory protein phoP | 3 |                    | GQGYLFELR                             | 215 | 9  | 3  | 30.18 | b4y4y7                                                   | 1082.56 | 72.195  | 31487 | 2 | 541.78  | -6.20  |
| P14146 PHOP_SALTY Virulence transcriptional regulatory protein phoP | 4 |                    | VQLQDSGHQVDAEDAR                      | 18  | 17 | 7  | 16.1  | b6*b6y2y9*y9y15y17                                       | 1838.85 | 36.020  | 18393 | 3 | 613.62  | -9.56  |
| P14146 PHOP_SALTY Virulence transcriptional regulatory protein phoP | 5 |                    | IQAQYPHDVITTVR                        | 201 | 14 | 6  | 71.57 | y4y7y8y9y10y12                                           | 1640.85 | 51.667  | 63205 | 3 | 547.62  | -16.66 |
| P14146 PHOP_SALTY Virulence transcriptional regulatory protein phoP | 6 |                    | MQALMR                                | 112 | 6  | 3  | 26.63 | b3b4*b4                                                  | 749.38  | 31.126  | 21831 | 1 | 749.38  | 3.10   |
| P14146 PHOP_SALTY Virulence transcriptional regulatory protein phoP | 7 |                    | DSLMLQLYPDaelR                        | 172 | 14 | 4  | 32.65 | b3b10y5y6                                                | 1663.83 | 80.557  | 2401  | 2 | 832.42  | -4.48  |
| P14146 PHOP_SALTY Virulence transcriptional regulatory protein phoP | 8 |                    | VEVLSSGADDYVTKPFHIEEVMA<br>R          | 88  | 24 | 5  | 16.61 | b3b13y5°y5y9                                             | 2692.28 | 62.070  | 2091  | 3 | 898.10  | -16.23 |
| P14146 PHOP_SALTY Virulence transcriptional regulatory protein phoP | 9 | Phosphoryl STY(11) | LTAFEYTIMETLIR                        | 150 | 14 | 5  | 31.17 | b10y4°y4y7y9                                             | 1780.83 | 66.554  | 1716  | 3 | 594.28  | -10.83 |
| Q8ZQT5 TOLB_SALTY Protein tolB                                      | 1 |                    | SNNTIPTWFPDSQTLAFTSDQAG<br>RPQVYK     | 287 | 29 | 6  | 16.7  | b5y1y13y16y24y29                                         | 3285.55 | 77.665  | 51345 | 3 | 1095.85 | 0.89   |
| Q8ZQT5 TOLB_SALTY Protein tolB                                      | 2 |                    | WAGPGAAPEDIGGIVAADLR                  | 43  | 20 | 9  | 46.45 | b7b11b14y2y6y9y13y15y2<br>0                              | 1936.01 | 85.506  | 23109 | 2 | 968.51  | 7.76   |
| Q8ZQT5 TOLB_SALTY Protein tolB                                      | 3 |                    | IEITQGVDSARPIGVVPFK                   | 24  | 19 | 12 | 55.1  | b2°b2b8*b8b9b10b11*b11<br>y2y3y16y19                     | 2026.12 | 70.617  | 22085 | 3 | 676.05  | -5.72  |
| Q8ZQT5 TOLB_SALTY Protein tolB                                      | 4 |                    | LPATDGQVK                             | 413 | 9  | 4  | 37.96 | y4y6y7y9                                                 | 928.51  | 27.674  | 20750 | 2 | 464.76  | -2.50  |
| Q8ZQT5 TOLB_SALTY Protein tolB                                      | 5 |                    | SALVIQTLANGAVR                        | 223 | 14 | 5  | 32.65 | b3b4y2y3y9                                               | 1412.82 | 70.959  | 19821 | 2 | 706.91  | -4.67  |
| Q8ZQT5 TOLB_SALTY Protein tolB                                      | 6 |                    | MNINGGAAQR                            | 316 | 10 | 6  | 51.48 | b2y4y6y7y8y10                                            | 1031.50 | 27.780  | 17155 | 2 | 516.26  | -1.89  |
| Q8ZQT5 TOLB_SALTY Protein tolB                                      | 7 |                    | QWLRYAGHTASDEVFEK                     | 138 | 17 | 6  | 32.31 | b5b7b10y7°y7y9                                           | 2037.00 | 94.786  | 27447 | 2 | 1019.00 | 7.19   |
| Q8ZQT5 TOLB_SALTY Protein tolB                                      | 8 |                    | VIQTLANGAVR                           | 226 | 11 | 0  | 3.73  |                                                          | 1141.66 | 71.046  | 32301 | 2 | 571.33  | -11.55 |
| Q8ZQT5 TOLB_SALTY Protein tolB                                      | 9 |                    | AAPEDIGGIVAADLR                       | 48  | 15 | 0  | 6.22  |                                                          | 1467.76 | 85.430  | 27922 | 2 | 734.38  | -12.23 |
| P25077 MDH_SALTY Malate dehydrogenase                               | 1 |                    | NQLPSGSELSLYDIAPVTPGVAVD<br>LSHIPTAVK | 21  | 33 | 17 | 50.1  | b2*b2b3*b3b10b12°b12*b<br>12b13b15y1y3y5y15y18y3<br>0y33 | 3388.80 | 93.788  | 66729 | 3 | 1130.27 | 1.30   |
| P25077 MDH_SALTY Malate dehydrogenase                               | 2 |                    | VAVLGAAGGIGQALALLK                    | 2   | 19 | 8  | 32.93 | b3y1y2y3y4y9y13y19                                       | 1735.09 | 120.093 | 55284 | 2 | 868.05  | 1.69   |
| P25077 MDH_SALTY Malate dehydrogenase                               | 3 |                    | IQNAGTEVVEAK                          | 205 | 12 | 12 | 68.31 | b2b6*b6y1y3°y3y4y5y8°y8<br>y10*y10                       | 1258.66 | 34.376  | 32834 | 2 | 629.83  | -2.23  |
| P25077 MDH_SALTY Malate dehydrogenase                               | 4 |                    | SDLFVNAGIVK                           | 87  | 12 | 5  | 49.3  | b3b4b5b6y1                                               | 1276.68 | 69.860  | 12760 | 2 | 638.85  | -4.11  |
| P25077 MDH_SALTY Malate dehydrogenase                               | 5 |                    | AGGGSATLSMGQAAAR                      | 217 | 16 | 7  | 41.52 | b9b13b14°b14*b14y6y7                                     | 1405.69 | 77.117  | 6355  | 2 | 703.35  | 3.04   |
| P25077 MDH_SALTY Malate dehydrogenase                               | 6 |                    | FFSQPLLLGK                            | 262 | 10 | 4  | 28.38 | b5°b5b6y6                                                | 1149.66 | 76.091  | 45693 | 2 | 575.33  | -6.90  |
| P25077 MDH_SALTY Malate dehydrogenase                               | 7 |                    | DIQLGEDFINK                           | 301 | 11 | 5  | 27.03 | b4°b4b5*b5y6                                             | 1291.64 | 97.950  | 2600  | 2 | 646.32  | -12.76 |
| P25077 MDH_SALTY Malate dehydrogenase                               | 8 |                    | IQNAGTEVVEAKAGGGSATLSMG<br>QAAAR      | 205 | 28 | 5  | 17.11 | b3b7*b7b15y11                                            | 2645.36 | 119.894 | 4943  | 4 | 662.10  | 12.64  |

|                                            |    |                                          |                                     |     |    |    |        |                                                                                       |         |         |        |   |         |        |
|--------------------------------------------|----|------------------------------------------|-------------------------------------|-----|----|----|--------|---------------------------------------------------------------------------------------|---------|---------|--------|---|---------|--------|
| P25077 MDH_SALTY Malate dehydrogenase      | 9  | Oxidation+M(16)                          | SIGTLSAFEQHSLDAMLDTLK               | 279 | 21 | 5  | 21.41  | b3°b3b5b19y7                                                                          | 2293.14 | 103.405 | 2804   | 3 | 765.05  | -0.32  |
| P25077 MDH_SALTY Malate dehydrogenase      | 10 |                                          | AGGGSATLSMGQAA                      | 217 | 14 | 1  | 7.25   | y12                                                                                   | 1178.55 | 77.181  | 2859   | 1 | 1178.55 | 1.66   |
| Q8ZP65 TPX_SALTY Probable thiol peroxidase | 1  |                                          | SQTVHFQGNPVTVANVIPQAGSK             | 1   | 23 | 31 | 175.83 | b2°b2*b2b3b4°b4b5b7b9°b9*b9b11b12°b12b13*b13b16*b16y4y5°y5*y5y6°y6y7y8y9y10*y10y12y23 | 2379.23 | 64.492  | 216768 | 3 | 793.75  | -4.41  |
| Q8ZP65 TPX_SALTY Probable thiol peroxidase | 2  | Carbamidomethyl+C(13)                    | VLNIFPSIDTGVCAASVR                  | 48  | 18 | 13 | 84.93  | b2b3b5°b5y6y7y9y10y13°y13y14y15y18                                                    | 1919.02 | 85.280  | 151954 | 2 | 960.01  | 6.49   |
| Q8ZP65 TPX_SALTY Probable thiol peroxidase | 3  | Carbamidomethyl+C(2)                     | FCGAEGLSNVITLSTLR                   | 93  | 17 | 9  | 54.92  | b2b3b7b12y4y6y13y15y17                                                                | 1837.96 | 86.204  | 131309 | 2 | 919.48  | 7.11   |
| Q8ZP65 TPX_SALTY Probable thiol peroxidase | 4  |                                          | DLSDVLSQYAGK                        | 33  | 13 | 7  | 45.62  | b4b5y6*y6y7y11y13                                                                     | 1382.68 | 58.987  | 73607  | 2 | 691.85  | 2.65   |
| Q8ZP65 TPX_SALTY Probable thiol peroxidase | 5  |                                          | NYGVEIVDGPLK                        | 116 | 12 | 7  | 36.87  | b2°b2b3y4y8y10y12                                                                     | 1303.68 | 64.865  | 32146  | 2 | 652.35  | -3.28  |
| Q8ZP65 TPX_SALTY Probable thiol peroxidase | 6  |                                          | DLSDVLSQYAGKR                       | 33  | 14 | 6  | 27.21  | b7b12°b12y7*y7y9                                                                      | 1538.76 | 54.746  | 15959  | 3 | 513.59  | -11.66 |
| Q8ZP65 TPX_SALTY Probable thiol peroxidase | 7  |                                          | AQAFTLVAK                           | 24  | 9  | 6  | 78.53  | b4b5y3y4y6y7                                                                          | 948.54  | 53.270  | 114007 | 2 | 474.77  | -15.25 |
| Q8ZP65 TPX_SALTY Probable thiol peroxidase | 8  |                                          | NNEFLK                              | 110 | 6  | 1  | 13.52  | b3                                                                                    | 764.40  | 37.440  | 9886   | 2 | 382.70  | 2.08   |
| Q8ZP65 TPX_SALTY Probable thiol peroxidase | 9  | Carbamidomethyl+C(15)                    | FNQLATEVENTVVLCSADLPFAQSR           | 67  | 26 | 3  | 12.02  | b5y8y12                                                                               | 2908.39 | 112.419 | 6628   | 3 | 970.14  | -19.47 |
| Q8ZP65 TPX_SALTY Probable thiol peroxidase | 10 |                                          | AVIVLDENDNVIFSQLVDEITHEPDYDAALNVLKA | 133 | 35 | 26 | 202.13 | b3b4b5b9°b9b10b11°b11b32y3y4y5y6y7y12y13°y13y14*y14y16y22y24y26y29y30y31              | 3882.95 | 120.464 | 147455 | 3 | 1294.99 | -2.70  |
| Q8ZP65 TPX_SALTY Probable thiol peroxidase | 11 |                                          | DLSDVLSQYAGKR                       | 33  | 14 | 5  | 38.56  | b10b13y6y7y9                                                                          | 1538.78 | 63.696  | 9107   | 3 | 513.60  | -0.48  |
| Q8ZP65 TPX_SALTY Probable thiol peroxidase | 12 | Phosphoryl STY(13)                       | MSQTVHFQGNPVTVANVIPQAGSK            | 0   | 24 | 5  | 35.21  | b11_H3PO4<br>b10b11b12_H3PO4<br>b12y6°y6                                              | 2590.21 | 86.594  | 56028  | 3 | 864.08  | -9.80  |
| Q8ZP65 TPX_SALTY Probable thiol peroxidase | 13 | Carbamidomethyl+C(2); Phosphoryl STY(14) | FCGAEGLSNVITLSTLR                   | 93  | 17 | 4  | 16.1   | b12°b12y5y10                                                                          | 1917.92 | 88.693  | 8365   | 3 | 639.98  | 9.87   |
| Q8ZP65 TPX_SALTY Probable thiol peroxidase | 14 | Phosphoryl STY(8)                        | DLSDVLSQYAGKR                       | 33  | 14 | 4  | 19.04  | b3b7°b7y6                                                                             | 1618.75 | 82.445  | 4460   | 3 | 540.25  | 6.41   |
| Q8ZRP4 DAPD_SALTY 2                        | 1  |                                          | EAVNQVISLLDSGALR                    | 28  | 16 | 6  | 41.52  | b6b7y5y6y10y16                                                                        | 1684.94 | 92.434  | 86387  | 2 | 842.97  | 7.68   |
| Q8ZRP4 DAPD_SALTY 2                        | 2  |                                          | INDNQVIDGAESR                       | 68  | 13 | 8  | 77.18  | y5y6y7y8y9°y9y10y13                                                                   | 1430.68 | 40.955  | 39514  | 2 | 715.85  | -1.79  |
| Q8ZRP4 DAPD_SALTY 2                        | 3  |                                          | MQQLQNVIETAFER                      | 0   | 14 | 4  | 19.04  | b3y4y6°y6                                                                             | 1706.87 | 92.427  | 24208  | 3 | 569.63  | 12.80  |
| Q8ZRP4 DAPD_SALTY 2                        | 4  |                                          | VPAGSVVVSGNLPKSKDGK                 | 226 | 18 | 4  | 15.37  | b4b6y11y18                                                                            | 1710.92 | 43.321  | 23684  | 3 | 570.98  | -13.70 |
| Q8ZRP4 DAPD_SALTY 2                        | 5  |                                          | VGINELLR                            | 263 | 8  | 3  | 48.34  | y3y5y7                                                                                | 913.53  | 66.050  | 49665  | 2 | 457.27  | -18.24 |
| Q8ZRP4 DAPD_SALTY 2                        | 6  |                                          | SEVVEGVIVEEGSVISMGVYLGQSTK          | 187 | 26 | 5  | 15.56  | b4°b4b15y10y15                                                                        | 2696.35 | 106.521 | 13907  | 3 | 899.45  | -8.15  |
| Q8ZRP4 DAPD_SALTY 2                        | 7  |                                          | QQLQNVIETAFER                       | 1   | 13 | 9  | 55.93  | b4b8°b8b11y3°y3y5°y5y12                                                               | 1575.79 | 66.098  | 3956   | 2 | 788.40  | -16.19 |
| Q8ZRP4 DAPD_SALTY 2                        | 8  |                                          | SEVVEGVIVEEGSVISMGVYLGQSTKIYDR      | 187 | 30 | 11 | 32.98  | b3°b3b5°b5b10°b10b11y4y8*y8y17                                                        | 3243.62 | 136.338 | 3186   | 3 | 1081.88 | -7.23  |
| Q8ZRP4 DAPD_SALTY 2                        | 9  | Oxidation+M(17)                          | SEVVEGVIVEEGSVISMGVYLGQSTK          | 187 | 26 | 5  | 26.16  | b14y5y10y13y22                                                                        | 2712.37 | 120.582 | 1572   | 2 | 1356.69 | 2.07   |
| Q8ZQS2 GPMA_SALTY 2                        | 1  |                                          | VIPYWNDILPR                         | 160 | 12 | 10 | 81.54  | y1y2y3y5y7y8°y8y9y10y12                                                               | 1486.81 | 81.719  | 64599  | 2 | 743.91  | 0.33   |
| Q8ZQS2 GPMA_SALTY 2                        | 2  |                                          | VIIAAHGNSLR                         | 178 | 11 | 5  | 50.14  | b2y5y6y8y9                                                                            | 1150.66 | 37.941  | 31721  | 2 | 575.83  | -7.74  |
| Q8ZQS2 GPMA_SALTY 2                        | 3  |                                          | LSEKELPLTESLALTIDR                  | 142 | 18 | 4  | 15.37  | b5b11y2y6                                                                             | 2028.12 | 83.362  | 7443   | 2 | 1014.57 | 0.48   |
| Q8ZQS2 GPMA_SALTY 2                        | 4  |                                          | LNER                                | 86  | 4  | 1  | 12.69  | b3                                                                                    | 531.29  | 46.871  | 15453  | 1 | 531.29  | 0.34   |
| Q8ZQS2 GPMA_SALTY 2                        | 5  |                                          | GVSEAK                              | 33  | 6  | 3  | 26.63  | b5°b5y5                                                                               | 590.32  | 28.101  | 13772  | 1 | 590.32  | 4.24   |

|                                                                                                                 |   |                                                |                                  |     |    |   |       |                        |         |         |       |   |         |        |
|-----------------------------------------------------------------------------------------------------------------|---|------------------------------------------------|----------------------------------|-----|----|---|-------|------------------------|---------|---------|-------|---|---------|--------|
| Q8ZQS2 GPMA_SALTY 2                                                                                             | 6 |                                                | GFAVTPPELTKDDER                  | 117 | 15 | 4 | 17.9  | b5y10°y10y12           | 1674.81 | 54.215  | 34473 | 2 | 837.91  | -13.19 |
| Q8ZQS2 GPMA_SALTY 2                                                                                             | 7 |                                                | IAAHGNSLR                        | 180 | 9  | 1 | 7.81  | b6                     | 938.51  | 37.979  | 30880 | 2 | 469.76  | -6.57  |
| P10372 HIS4_SALTY 1-(5-phohoribosyl)-5-[(5-phohoribosylamino)methylideneamino]imidazole-4-carboxamide isomerase | 1 |                                                | MIIPALDLIDGTVVR                  | 0   | 15 | 5 | 36.36 | b2y5y6y9y12            | 1625.93 | 103.002 | 81957 | 2 | 813.47  | -0.23  |
| P10372 HIS4_SALTY 1-(5-phohoribosyl)-5-[(5-phohoribosylamino)methylideneamino]imidazole-4-carboxamide isomerase | 2 |                                                | QVAVSGWQENSGVSLEQLVETYL<br>PVGLK | 138 | 28 | 9 | 35.74 | b3b4*b4b7b13b16y3y5y28 | 3030.60 | 118.084 | 12162 | 3 | 1010.87 | 6.20   |
| P10372 HIS4_SALTY 1-(5-phohoribosyl)-5-[(5-phohoribosylamino)methylideneamino]imidazole-4-carboxamide isomerase | 3 |                                                | YPQIAFQSSGGIGDIDDIAALR           | 193 | 22 | 4 | 20.59 | b11b13b18y13           | 2307.16 | 118.268 | 5312  | 2 | 1154.08 | -2.22  |
| P10372 HIS4_SALTY 1-(5-phohoribosyl)-5-[(5-phohoribosylamino)methylideneamino]imidazole-4-carboxamide isomerase | 4 |                                                | QIPLIK                           | 60  | 6  | 2 | 26.63 | b4b5                   | 711.48  | 54.445  | 4003  | 1 | 711.48  | 3.35   |
| P10372 HIS4_SALTY 1-(5-phohoribosyl)-5-[(5-phohoribosylamino)methylideneamino]imidazole-4-carboxamide isomerase | 5 | Carbamidomethyl+C(5)                           | EAIQCWQNV                        | 236 | 9  | 3 | 30.18 | b3y4y7                 | 1147.52 | 82.716  | 3082  | 1 | 1147.52 | -0.43  |
| P10372 HIS4_SALTY 1-(5-phohoribosyl)-5-[(5-phohoribosylamino)methylideneamino]imidazole-4-carboxamide isomerase | 6 |                                                | LQDYAAQGAGVLHLVDLTGAK            | 34  | 21 | 3 | 13.7  | b10y3y6                | 2140.10 | 81.100  | 2817  | 3 | 714.04  | -19.51 |
| P10372 HIS4_SALTY 1-(5-phohoribosyl)-5-[(5-phohoribosylamino)methylideneamino]imidazole-4-carboxamide isomerase | 7 | Carbamidomethyl+C(9)                           | FTVKEAQCWQNV                     | 232 | 13 | 4 | 25.15 | b9*b9y3y4              | 1622.81 | 53.235  | 6093  | 3 | 541.61  | 5.42   |
| P10372 HIS4_SALTY 1-(5-phohoribosyl)-5-[(5-phohoribosylamino)methylideneamino]imidazole-4-carboxamide isomerase | 8 | Carbamidomethyl+C(4);<br>Carbamidomethyl+C(25) | HVLCTDISRDGTLAGSNVSLYEEV<br>CAR  | 166 | 27 | 5 | 25.66 | b4b7°b7b11b13          | 3022.43 | 121.478 | 1522  | 3 | 1008.15 | -1.70  |
| P67617 FETP_SALTY Probable Fe(2+)-trafficking protein                                                           | 1 |                                                | QTMLINEK                         | 45  | 8  | 9 | 48.89 | b7y2°y2y3*y3y4y5y8*y8  | 976.51  | 41.179  | 24658 | 2 | 488.76  | -2.75  |
| P67617 FETP_SALTY Probable Fe(2+)-trafficking protein                                                           | 2 |                                                | DAEQQDFQLYPGELGK                 | 12  | 16 | 3 | 16.93 | b11b14y13              | 1766.83 | 68.466  | 15893 | 2 | 883.92  | 6.01   |
| P67617 FETP_SALTY Probable Fe(2+)-trafficking protein                                                           | 3 |                                                | LLEQEMVSFLFEGK                   | 64  | 14 | 7 | 27.21 | b5°b5b13y7°y7y12*y12   | 1669.87 | 101.741 | 17814 | 2 | 835.44  | 10.45  |
| P67617 FETP_SALTY Probable Fe(2+)-trafficking protein                                                           | 4 | Phosphoryl STY(6)                              | IYNEISKDAWAQWQHK                 | 29  | 16 | 8 | 71.11 | b4y4y5y6y7y8y10°y10    | 2096.96 | 65.280  | 3057  | 3 | 699.66  | 3.03   |
| P67617 FETP_SALTY Probable Fe(2+)-trafficking protein                                                           | 5 | Oxidation+M(6)                                 | LLEQEMVSFLFEGKDVHIEGYTPE<br>DK   | 64  | 26 | 3 | 18.16 | y5y11y20               | 3069.51 | 132.869 | 23906 | 3 | 1023.84 | 10.66  |
| P67617 FETP_SALTY Probable Fe(2+)-trafficking protein                                                           | 6 |                                                | GQDFQLYPGELGK                    | 15  | 13 | 0 | 4.56  |                        | 1451.70 | 68.388  | 2699  | 3 | 484.57  | -12.11 |
| P69936 YDFG_SALTY NADP-dependent L-serine/L-allo-threonine dehydrogenase ydfG                                   | 1 |                                                | AVLPGMVER                        | 115 | 9  | 4 | 37.96 | b1y4y6y7               | 971.52  | 53.102  | 33549 | 2 | 486.27  | -11.87 |

|                                                                                |    |                       |                                     |     |    |    |        |                                   |         |         |        |   |         |        |
|--------------------------------------------------------------------------------|----|-----------------------|-------------------------------------|-----|----|----|--------|-----------------------------------|---------|---------|--------|---|---------|--------|
| [P69936]YDFG_SALTY NADP-dependent L-serine/L-allo-threonine dehydrogenase ydfG | 2  |                       | VTDIEPGLVGGTEFSSVR                  | 171 | 18 | 10 | 48.87  | b2b3°b3y5y9y12y13y14°y14y18       | 1862.96 | 69.125  | 28394  | 2 | 931.98  | 6.95   |
| [P69936]YDFG_SALTY NADP-dependent L-serine/L-allo-threonine dehydrogenase ydfG | 3  |                       | AAIEEMMASLPAQWR                     | 58  | 15 | 4  | 41.13  | y4y8y10y14                        | 1703.84 | 90.955  | 15155  | 2 | 852.42  | 8.38   |
| [P69936]YDFG_SALTY NADP-dependent L-serine/L-allo-threonine dehydrogenase ydfG | 4  |                       | GHIINIGSTAGSWPYAGGNVYGATK           | 126 | 25 | 3  | 21.81  | b4y12y13                          | 2491.26 | 99.185  | 2460   | 3 | 831.09  | 9.70   |
| [P69936]YDFG_SALTY NADP-dependent L-serine/L-allo-threonine dehydrogenase ydfG | 5  |                       | DIDVLVNNAGLALGLEPAHK                | 73  | 20 | 5  | 14.19  | b3b7°b7°b7y7                      | 2059.16 | 109.967 | 12625  | 2 | 1030.08 | 18.02  |
| [P69936]YDFG_SALTY NADP-dependent L-serine/L-allo-threonine dehydrogenase ydfG | 6  | Carbamidomethyl+C(15) | MIVLVTGATAGFGECIAR                  | 0   | 18 | 5  | 21.42  | b9b15y8y12°y12                    | 1865.99 | 79.010  | 3249   | 3 | 622.67  | 15.57  |
| [P69936]YDFG_SALTY NADP-dependent L-serine/L-allo-threonine dehydrogenase ydfG | 7  |                       | IINIGSTAGSWPYAGGNVYGATK             | 128 | 23 | 1  | 8.39   | b13                               | 2297.17 | 99.269  | 3411   | 2 | 1149.09 | 4.25   |
| [P66193]RL31B_SALTY 50S ribosomal protein L31 type B                           | 1  |                       | TFDSESSAAR                          | 62  | 10 | 8  | 67.6   | y1y4°y4y5y6y7y8y10                | 1070.47 | 24.555  | 77256  | 2 | 535.74  | -7.41  |
| [P66193]RL31B_SALTY 50S ribosomal protein L31 type B                           | 2  |                       | TEREIELDGVTPYPVTIDVSSK              | 30  | 22 | 4  | 13.27  | b8b10y11°y11                      | 2514.24 | 113.733 | 2062   | 3 | 838.75  | -9.52  |
| [P66193]RL31B_SALTY 50S ribosomal protein L31 type B                           | 3  |                       | TVVFHDTSANEEYVK                     | 10  | 14 | 12 | 104.87 | b10b11y3y4°y4y8y9°y9y10°y10y11y12 | 1609.76 | 47.127  | 356267 | 3 | 537.26  | -17.52 |
| [P66193]RL31B_SALTY 50S ribosomal protein L31 type B                           | 4  |                       | VGSTIKTER                           | 24  | 9  | 3  | 37.96  | y3y4y5                            | 990.54  | 18.237  | 28863  | 2 | 495.78  | -13.68 |
| [P66193]RL31B_SALTY 50S ribosomal protein L31 type B                           | 5  |                       | EIELDGVTPYPVTIDVSSKSHPFYTG          | 33  | 27 | 6  | 20.86  | b5b8y7y12°y12y25                  | 3073.47 | 76.356  | 5572   | 3 | 1025.16 | -13.50 |
| [P66193]RL31B_SALTY 50S ribosomal protein L31 type B                           | 6  |                       | TEREIELDGVTPYPVTIDVSSK              | 30  | 22 | 3  | 13.27  | b3b9y10                           | 2514.24 | 102.037 | 4368   | 3 | 838.75  | -10.10 |
| [Q8ZL56]GPMI_SALTY 2                                                           | 1  | Carbamidomethyl+C(8)  | AVEALDNCIEQVTK                      | 416 | 14 | 6  | 30.38  | b1b12y2y7y10y11                   | 1589.79 | 61.213  | 21381  | 2 | 795.40  | 3.30   |
| [Q8ZL56]GPMI_SALTY 2                                                           | 2  |                       | LSDIAPTMLSLMGMEIPQEMTGKPLFIVE       | 485 | 29 | 7  | 36.14  | b3b4b5b7y1y2y29                   | 3191.60 | 121.279 | 19730  | 3 | 1064.54 | -2.68  |
| [Q8ZL56]GPMI_SALTY 2                                                           | 3  |                       | VATYDLQPEMSSAELTEK                  | 364 | 18 | 8  | 30.55  | b1b7b9y2y9y11y17y18               | 2011.97 | 63.150  | 12528  | 2 | 1006.49 | 8.55   |
| [Q8ZL56]GPMI_SALTY 2                                                           | 4  |                       | TAVAYPPASLANTFGEWMAK                | 303 | 20 | 6  | 27.59  | b9b15y14*y14y15°y15               | 2125.05 | 95.757  | 12374  | 2 | 1063.03 | 3.68   |
| [Q8ZL56]GPMI_SALTY 2                                                           | 5  |                       | AFVNADFDGFARK                       | 272 | 13 | 3  | 20.38  | b3y10y12                          | 1457.72 | 74.900  | 3289   | 2 | 729.36  | 2.09   |
| [Q8ZL56]GPMI_SALTY 2                                                           | 6  |                       | YAHVTFFFNGGVVEEPFAGEER              | 336 | 21 | 3  | 13.7   | b5b12y6                           | 2403.12 | 94.927  | 1877   | 3 | 801.71  | 5.99   |
| [Q8ZL56]GPMI_SALTY 2                                                           | 7  | Carbamidomethyl+C(6)  | YDTIICNYPNGDMVGHTGVMEAAIK           | 391 | 25 | 8  | 37.15  | b4b7b9b11y4y8°y8y11               | 2769.31 | 119.483 | 49066  | 3 | 923.78  | 16.93  |
| [Q8ZL56]GPMI_SALTY 2                                                           | 8  |                       | TPVMDALWAK                          | 31  | 10 | 3  | 28.38  | b4b5y3                            | 1131.59 | 72.001  | 20479  | 2 | 566.30  | -0.22  |
| [Q8ZL56]GPMI_SALTY 2                                                           | 9  |                       | DPATGQAHTAHTNLPVPLIYVGEK            | 452 | 24 | 5  | 19.19  | b9b11b15y5°y5                     | 2529.27 | 84.729  | 6081   | 3 | 843.76  | -15.83 |
| [Q8ZL56]GPMI_SALTY 2                                                           | 10 |                       | KPMVLVILDGYGYR                      | 5   | 14 | 3  | 24.48  | b3b4y12                           | 1623.91 | 101.826 | 5341   | 2 | 812.46  | 13.46  |
| [Q8ZL56]GPMI_SALTY 2                                                           | 11 |                       | TFFANPVLTNVAVDQAK                   | 91  | 16 | 3  | 16.93  | b7y5y9                            | 1735.87 | 82.778  | 4906   | 2 | 868.44  | -16.46 |
| [Q8ZL56]GPMI_SALTY 2                                                           | 12 |                       | GAEK                                | 141 | 4  | 1  | 12.69  | y3                                | 404.21  | 29.961  | 3911   | 1 | 404.21  | 0.98   |
| [Q8ZL56]GPMI_SALTY 2                                                           | 13 |                       | ERTFFANPVLTNVAVDQAK                 | 89  | 18 | 8  | 26.26  | b12°b12°b12y4°y4y7y8°y8           | 2021.03 | 104.397 | 2840   | 2 | 1011.02 | -7.13  |
| [Q8ZL56]GPMI_SALTY 2                                                           | 14 | Oxidation+M(5)        | AVHIMGLLSAGGVHSHEDHIMAMVELAAER      | 111 | 30 | 5  | 11.3   | b5y8°y8y11°y11                    | 3197.53 | 115.623 | 4625   | 3 | 1066.51 | -12.22 |
| [Q8ZL56]GPMI_SALTY 2                                                           | 15 | Oxidation+M(5)        | AYDLMTLAQGEFQADTAVAGLQAAYARDENDEFVK | 202 | 35 | 6  | 16.73  | b4b7b9y10*y10y12                  | 3837.84 | 131.438 | 2890   | 4 | 960.21  | 11.77  |
| [Q8ZL56]GPMI_SALTY 2                                                           | 16 | Carbamidomethyl+C(1)  | CIEQVTK                             | 423 | 7  | 1  | 7.3    | b5                                | 877.45  | 61.144  | 6054   | 1 | 877.45  | 4.17   |
| [P02906]SUBI_SALTY Sulfate-binding protein                                     | 1  |                       | YLYSPEGQEIAAK                       | 263 | 13 | 7  | 46.8   | b10°b10y7y9y10y11y13              | 1468.73 | 50.532  | 38633  | 2 | 734.87  | -0.58  |



|                                                    |    |                      |                                           |     |    |    |        |                                                                    |         |         |        |   |         |        |
|----------------------------------------------------|----|----------------------|-------------------------------------------|-----|----|----|--------|--------------------------------------------------------------------|---------|---------|--------|---|---------|--------|
| [P02906]SUBI_SALTY Sulfate-binding protein         | 2  |                      | NVEVLDSGAR                                | 183 | 10 | 5  | 51.48  | b2y4y5y6y8                                                         | 1059.54 | 39.990  | 23744  | 2 | 530.27  | -6.34  |
| [P02906]SUBI_SALTY Sulfate-binding protein         | 3  |                      | DIQLLNVSYPDTRELYEQYNK                     | 20  | 21 | 5  | 21.41  | b4b9b12*b12y11                                                     | 2601.31 | 77.530  | 1931   | 2 | 1301.16 | 10.04  |
| [P02906]SUBI_SALTY Sulfate-binding protein         | 4  |                      | GSTNTFVER                                 | 193 | 9  | 4  | 30.18  | b5°b5b7y3                                                          | 1010.50 | 38.337  | 9693   | 2 | 505.76  | 12.81  |
| [P02906]SUBI_SALTY Sulfate-binding protein         | 5  |                      | QSHGGSGKQATSVINGIEADVVTL<br>ALAYDVIDAIAER | 58  | 36 | 4  | 23.08  | b11°b11b12b19                                                      | 3655.82 | 87.672  | 5741   | 5 | 731.97  | -8.61  |
| [P02906]SUBI_SALTY Sulfate-binding protein         | 6  |                      | NVEVLDSGARGSTNTFVER                       | 183 | 19 | 3  | 14.74  | b12b14y16                                                          | 2051.03 | 91.500  | 3566   | 3 | 684.35  | 7.14   |
| [P02906]SUBI_SALTY Sulfate-binding protein         | 7  |                      | DIQLLNVSYPDTRELYEQYNK                     | 20  | 21 | 4  | 18.63  | b3b12y4y8                                                          | 2601.27 | 118.073 | 1504   | 3 | 867.76  | -5.54  |
| [P0A2E1]GLYA_SALTY Serine hydroxymethyltransferase | 1  |                      | LNSAVFPSAQGGPLMHVIAGK                     | 251 | 21 | 9  | 29.35  | b2b4°b4*b4b11y3y4y15y2<br>1                                        | 2094.11 | 78.635  | 79024  | 3 | 698.71  | -5.48  |
| [P0A2E1]GLYA_SALTY Serine hydroxymethyltransferase | 2  |                      | SPFVTSGIR                                 | 354 | 9  | 3  | 30.18  | b3y5y6                                                             | 963.52  | 49.301  | 46198  | 2 | 482.26  | -6.97  |
| [P0A2E1]GLYA_SALTY Serine hydroxymethyltransferase | 3  |                      | VMQAQGSQLTNK                              | 42  | 12 | 13 | 107.84 | b3b5b10y2y3y4y7y8*y8y9<br>y10*y10y12                               | 1304.66 | 29.551  | 43606  | 2 | 652.83  | -2.81  |
| [P0A2E1]GLYA_SALTY Serine hydroxymethyltransferase | 4  |                      | EMNIADYDAELWQAMEQEK                       | 4   | 19 | 6  | 21.7   | y2y6y11°y11y13y19                                                  | 2314.02 | 92.598  | 21741  | 2 | 1157.51 | 6.65   |
| [P0A2E1]GLYA_SALTY Serine hydroxymethyltransferase | 5  |                      | VYQQQVAK                                  | 285 | 8  | 7  | 40.56  | b2y2y5y6*y6y7y8                                                    | 963.52  | 19.506  | 20716  | 2 | 482.26  | -7.28  |
| [P0A2E1]GLYA_SALTY Serine hydroxymethyltransferase | 6  |                      | MIIGGFSAYSGVVDWAK                         | 168 | 17 | 8  | 49.18  | b9°b9b10y8°y8y11y12y16                                             | 1800.89 | 103.432 | 15597  | 3 | 600.97  | -3.46  |
| [P0A2E1]GLYA_SALTY Serine hydroxymethyltransferase | 7  |                      | AVALKEAMEPEFK                             | 272 | 13 | 4  | 20.38  | b1b11y5y11                                                         | 1462.76 | 59.422  | 10449  | 2 | 731.88  | -2.75  |
| [P0A2E1]GLYA_SALTY Serine hydroxymethyltransferase | 8  | Carbamidomethyl+C(7) | ELAGWMCDVLDNINDEATIER                     | 380 | 21 | 11 | 30.79  | b2°b2b4y2y6°y6y7°y7y10*<br>y10y13                                  | 2464.13 | 101.841 | 9887   | 2 | 1232.57 | 7.33   |
| [P0A2E1]GLYA_SALTY Serine hydroxymethyltransferase | 9  |                      | QEEHIELIASENYTSR                          | 25  | 17 | 3  | 24.75  | b9b11b12                                                           | 2015.99 | 80.158  | 5150   | 2 | 1008.50 | 13.02  |
| [P0A2E1]GLYA_SALTY Serine hydroxymethyltransferase | 10 | Carbamidomethyl+C(5) | VLDICAR                                   | 405 | 7  | 3  | 40.15  | y4y5y6                                                             | 846.44  | 44.649  | 42028  | 2 | 423.72  | -15.86 |
| [P0A2E1]GLYA_SALTY Serine hydroxymethyltransferase | 11 |                      | NSVPNDPK                                  | 346 | 8  | 5  | 48.89  | b5y5y6y7°y7                                                        | 870.43  | 104.514 | 3625   | 1 | 870.43  | -3.51  |
| [P0A2E1]GLYA_SALTY Serine hydroxymethyltransferase | 12 |                      | LYNIVPYGIDESGKIDYDEMAK                    | 138 | 22 | 3  | 22.02  | b3y17y18                                                           | 2533.23 | 76.699  | 82680  | 3 | 845.08  | 6.46   |
| [P0A2E1]GLYA_SALTY Serine hydroxymethyltransferase | 13 |                      | NSVPNDPKSPFVTSGIR                         | 346 | 17 | 6  | 33.56  | b5b9y8y9°y9y14                                                     | 1814.92 | 52.356  | 40314  | 3 | 605.64  | -12.58 |
| [P0A2E1]GLYA_SALTY Serine hydroxymethyltransferase | 14 |                      | VMQAQGSQLTNKYAEGYPGK                      | 42  | 20 | 4  | 30.45  | y6y10y11y13                                                        | 2170.09 | 108.968 | 1777   | 3 | 724.03  | 13.50  |
| [P0A2E1]GLYA_SALTY Serine hydroxymethyltransferase | 15 | Oxidation+M(1)       | MIIGGFSAYSGVVDWAK                         | 168 | 17 | 6  | 29.58  | b7°b7b10y12y13°y13                                                 | 1816.91 | 66.681  | 12778  | 3 | 606.31  | 7.46   |
| [P0A9Y9]CC_SALTY Cold shock-like protein cC        | 1  |                      | GFGFITPADGSK                              | 15  | 12 | 24 | 154.15 | b2b3b4b5b6°b6b12y1y2°y2<br>y3°y3y4°y4y5y6°y6y7°y7y8<br>°y8y9y10y12 | 1196.59 | 64.325  | 594583 | 2 | 598.80  | -4.18  |
| [P0A9Y9]CC_SALTY Cold shock-like protein cC        | 2  |                      | DVVFHFSAIQNGGFK                           | 27  | 15 | 4  | 31.46  | b8b13y5y6                                                          | 1665.82 | 74.349  | 72888  | 3 | 555.94  | -11.07 |
| [P0A9Y9]CC_SALTY Cold shock-like protein cC        | 3  |                      | GPAAVNVTAI                                | 59  | 10 | 5  | 41.39  | b2b3b7b9y10                                                        | 912.51  | 59.556  | 27180  | 1 | 912.51  | -4.15  |
| [P0A9Y9]CC_SALTY Cold shock-like protein cC        | 4  |                      | TLAEGQNVEFEIQDGQK                         | 42  | 17 | 4  | 22.59  | b9b13y4y12                                                         | 1905.92 | 74.037  | 1816   | 2 | 953.46  | 1.73   |
| [P0A9Y9]CC_SALTY Cold shock-like protein cC        | 5  |                      | WFNESK                                    | 9   | 6  | 1  | 13.52  | b3                                                                 | 810.39  | 106.580 | 4976   | 1 | 810.39  | 13.48  |
| [P0A9Y9]CC_SALTY Cold shock-like protein cC        | 6  |                      | TLAEGQNVEFEIQDGQKGPAAVN<br>VTAI           | 42  | 27 | 4  | 17.87  | b3b11b22°b22                                                       | 2799.42 | 75.968  | 80446  | 3 | 933.81  | 1.48   |
| [P0A9Y9]CC_SALTY Cold shock-like protein cC        | 7  |                      | GFGFITPADGSKDVVFVHFSAIQGN<br>GFK          | 15  | 27 | 4  | 25.1   | b4b7y10y11                                                         | 2843.39 | 88.933  | 32561  | 4 | 711.60  | -9.02  |

|                                                         |    |                       |                                                                 |     |    |    |        |                                                                                   |         |         |       |   |         |        |
|---------------------------------------------------------|----|-----------------------|-----------------------------------------------------------------|-----|----|----|--------|-----------------------------------------------------------------------------------|---------|---------|-------|---|---------|--------|
| [P0A9Y9]CC_SALTY Cold shock-like protein cC             | 8  |                       | DVFBVHFSAIQNGFGKTLAEGQNV<br>EFEIQDQGQK                          | 27  | 32 | 5  | 13.38  | b5b8y3*y3y10                                                                      | 3552.78 | 116.449 | 9122  | 3 | 1184.93 | 11.00  |
| [P0A9Y9]CC_SALTY Cold shock-like protein cC             | 9  |                       | GFITPADGSK                                                      | 17  | 10 | 0  | 2.9    |                                                                                   | 992.50  | 64.305  | 2486  | 1 | 992.50  | -7.63  |
| [P0A1F8]DHAS_SALTY Aartate-semialdehyde dehydrogenase   | 1  |                       | ELLTQMGQLYGHVADELATPSSAI<br>LDIERK                              | 174 | 30 | 4  | 11.3   | b9y5y27y30                                                                        | 3298.66 | 129.241 | 29405 | 3 | 1100.23 | -10.95 |
| [P0A1F8]DHAS_SALTY Aartate-semialdehyde dehydrogenase   | 2  | Carbamidomethyl+C(14) | ILNTASVIPVDGLCVR                                                | 252 | 16 | 8  | 51.32  | b3y2y3y5y8°y8y9y11                                                                | 1726.95 | 77.830  | 29355 | 2 | 863.98  | -0.42  |
| [P0A1F8]DHAS_SALTY Aartate-semialdehyde dehydrogenase   | 3  |                       | MKDDAIIILDVPNQDVITDGLNNG<br>VK                                  | 103 | 26 | 4  | 21.79  | b6b7y1y13                                                                         | 2810.46 | 86.338  | 27417 | 3 | 937.49  | -1.56  |
| [P0A1F8]DHAS_SALTY Aartate-semialdehyde dehydrogenase   | 4  |                       | GMVGSVLMQR                                                      | 10  | 10 | 7  | 38.93  | b5b7y2*y2y3y7y10                                                                  | 1077.55 | 59.026  | 17362 | 2 | 539.28  | -0.11  |
| [P0A1F8]DHAS_SALTY Aartate-semialdehyde dehydrogenase   | 5  |                       | ELLTQMGQLYGHVADELATPSSAI<br>LDIER                               | 174 | 29 | 6  | 21.93  | b2b13y4y10y11°y11                                                                 | 3170.61 | 106.526 | 8355  | 3 | 1057.54 | 2.85   |
| [P0A1F8]DHAS_SALTY Aartate-semialdehyde dehydrogenase   | 6  |                       | SGELPVDNFGVPLAGSLIPWIDK                                         | 210 | 23 | 4  | 12.89  | b2b9b15y5                                                                         | 2424.27 | 111.569 | 5108  | 3 | 808.76  | -4.53  |
| [P0A1F8]DHAS_SALTY Aartate-semialdehyde dehydrogenase   | 7  |                       | ELTPAAVTGTLTTPVGR                                               | 315 | 17 | 3  | 16.1   | b12y4y14                                                                          | 1683.94 | 68.588  | 23445 | 2 | 842.47  | 4.93   |
| [P0A1F8]DHAS_SALTY Aartate-semialdehyde dehydrogenase   | 8  | Carbamidomethyl+C(8)  | ALDIIVTCQGGDYTNEIYPK                                            | 65  | 20 | 10 | 68.6   | b3b4b9*b9b12*b12b13b15<br>y6y7                                                    | 2270.06 | 96.808  | 22477 | 3 | 757.36  | -19.79 |
| [P0A1F8]DHAS_SALTY Aartate-semialdehyde dehydrogenase   | 9  |                       | LNMGPPEFLSAFTVGDQLWGAAE<br>PLR                                  | 335 | 26 | 5  | 12.02  | b9*b9b11°b11y4                                                                    | 2832.39 | 103.461 | 2916  | 3 | 944.80  | -16.64 |
| [P0A1F8]DHAS_SALTY Aartate-semialdehyde dehydrogenase   | 10 | Carbamidomethyl+C(8)  | ALDIIVTCQGGDYTNEIYPKLR                                          | 65  | 22 | 5  | 36.87  | b11°b11b13b14b15                                                                  | 2539.28 | 99.371  | 4259  | 3 | 847.10  | -2.02  |
| [P0A1F8]DHAS_SALTY Aartate-semialdehyde dehydrogenase   | 11 |                       | GMVGSVLMQRMVEER                                                 | 10  | 15 | 6  | 29.09  | b6y3y4°y4y11°y11                                                                  | 1721.87 | 75.189  | 2482  | 2 | 861.44  | 11.49  |
| [P0A1F8]DHAS_SALTY Aartate-semialdehyde dehydrogenase   | 12 |                       | VVPNDRDITMR                                                     | 304 | 11 | 4  | 35.78  | b6*b6b7b8                                                                         | 1315.67 | 119.897 | 1595  | 2 | 658.34  | -6.59  |
| [P0A1F8]DHAS_SALTY Aartate-semialdehyde dehydrogenase   | 13 | Oxidation+M(2)        | GMVGSVLMQR                                                      | 10  | 10 | 4  | 26.62  | b7y7*y7y9                                                                         | 1093.55 | 68.494  | 11860 | 2 | 547.28  | -2.68  |
| [P10370]HISX_SALTY Histidinol dehydrogenase             | 1  |                       | AGFSALASTIETLAAER                                               | 397 | 18 | 14 | 88.91  | b2b8b14y1y4°y4y5y6y7°y7<br>y8°y8y11y12                                            | 1778.93 | 103.424 | 77838 | 2 | 889.97  | 2.74   |
| [P10370]HISX_SALTY Histidinol dehydrogenase             | 2  |                       | NIETFHSAQTLPPVDVETQPGVR                                         | 93  | 23 | 6  | 33.21  | b6b9b11°b11y11y12                                                                 | 2535.28 | 62.332  | 62481 | 3 | 845.77  | 0.00   |
| [P10370]HISX_SALTY Histidinol dehydrogenase             | 3  |                       | VTPEEIAAAGAR                                                    | 67  | 12 | 5  | 44.53  | y6y8y9y10y12                                                                      | 1184.62 | 49.163  | 57449 | 2 | 592.81  | -5.46  |
| [P10370]HISX_SALTY Histidinol dehydrogenase             | 4  | Carbamidomethyl+C(5)  | DLAQCAISNQYGPEHLIQTR                                            | 311 | 22 | 6  | 20.59  | b11*b11y10y14y16y22                                                               | 2526.28 | 75.386  | 47829 | 3 | 842.77  | 3.19   |
| [P10370]HISX_SALTY Histidinol dehydrogenase             | 5  | Carbamidomethyl+C(11) | SFNTLIDWNSCSPEQQR                                               | 1   | 17 | 5  | 22.59  | b3b12y3y5y17                                                                      | 2081.95 | 74.591  | 32463 | 2 | 1041.48 | 7.51   |
| [P10370]HISX_SALTY Histidinol dehydrogenase             | 6  | Carbamidomethyl+C(1)  | CQQVTRPVSSVGLYPGGSAPLFS<br>TVLMLATPAR                           | 116 | 34 | 5  | 12.9   | b2b3b9y14y19                                                                      | 3573.91 | 112.829 | 23446 | 3 | 1191.97 | 4.03   |
| [P10370]HISX_SALTY Histidinol dehydrogenase             | 7  |                       | MTVQELSK                                                        | 389 | 8  | 5  | 40.56  | b4b5b7b8°b8                                                                       | 935.49  | 56.160  | 5467  | 2 | 468.25  | 4.05   |
| [P10370]HISX_SALTY Histidinol dehydrogenase             | 8  |                       | TVSDILDNVK                                                      | 34  | 10 | 4  | 38.93  | b4b8y5y8                                                                          | 1103.59 | 60.646  | 26156 | 2 | 552.30  | -6.75  |
| [P10370]HISX_SALTY Histidinol dehydrogenase             | 9  |                       | LDGAAIDMPAGPSEVLVIADSGAT<br>PDFVASDLLSQAHEGPDQSVILLT<br>PDADIAR | 224 | 55 | 26 | 195.73 | b3b4b5b6b7b8b10b11b13°<br>b13b14b15b16°b16b17y3y<br>5°y5y7y8y9°y9y10y11y14y<br>31 | 5541.73 | 113.168 | 13553 | 4 | 1386.19 | -5.20  |
| [P10370]HISX_SALTY Histidinol dehydrogenase             | 10 |                       | QVSQR                                                           | 219 | 5  | 1  | 13.11  | y3                                                                                | 617.33  | 70.232  | 8551  | 1 | 617.33  | -3.46  |
| [P10370]HISX_SALTY Histidinol dehydrogenase             | 11 | Carbamidomethyl+C(42) | DLVDAITSAGSVFLGDWSPESAG<br>DYASGTNHVLPPTYGTATCSSLG<br>LADFQKR   | 336 | 53 | 3  | 12.08  | b5b9y6                                                                            | 5568.61 | 99.148  | 44732 | 5 | 1114.53 | -1.49  |
| [P0A2C5]RBSB_SALTY D-ribose-binding periplasmic protein | 1  |                       | ILLINPTDSDAVGNAVK                                               | 84  | 17 | 9  | 53.16  | b2b3b4b10b12y11y12y14y<br>17                                                      | 1739.96 | 70.781  | 22721 | 2 | 870.48  | 2.03   |
| [P0A2C5]RBSB_SALTY D-ribose-binding periplasmic protein | 2  |                       | DTIALVISTLNNPFFVSLKDGAQK<br>EADK                                | 26  | 28 | 6  | 33.16  | y1y5y8y12y13y25                                                                   | 3034.58 | 114.523 | 15365 | 4 | 759.40  | -11.18 |

|                                                         |    |                       |                          |     |    |    |        |                                               |         |         |        |   |         |        |
|---------------------------------------------------------|----|-----------------------|--------------------------|-----|----|----|--------|-----------------------------------------------|---------|---------|--------|---|---------|--------|
| [P0A2C5]RBSB_SALTY D-ribose-binding periplasmic protein | 3  |                       | LVIK                     | 291 | 4  | 1  | 12.69  | y3                                            | 472.35  | 56.989  | 24701  | 1 | 472.35  | -5.81  |
| [P0A2C5]RBSB_SALTY D-ribose-binding periplasmic protein | 4  |                       | DGAQK                    | 45  | 5  | 1  | 13.11  | y4                                            | 518.26  | 35.507  | 20756  | 1 | 518.26  | 8.83   |
| [P0A2C5]RBSB_SALTY D-ribose-binding periplasmic protein | 5  |                       | YPVDLK                   | 285 | 6  | 2  | 26.63  | b4b5                                          | 734.41  | 73.028  | 11653  | 1 | 734.41  | 8.14   |
| [P0A2C5]RBSB_SALTY D-ribose-binding periplasmic protein | 6  |                       | GDVVSHIASDNVLGGK         | 119 | 16 | 4  | 27.33  | b5y7y9y14                                     | 1567.84 | 68.602  | 8455   | 2 | 784.42  | 19.93  |
| [P0A2C5]RBSB_SALTY D-ribose-binding periplasmic protein | 7  |                       | IAGDYIAK                 | 135 | 8  | 3  | 40.56  | y4y6y7                                        | 850.45  | 35.781  | 4123   | 2 | 425.73  | -22.10 |
| [P0A2C5]RBSB_SALTY D-ribose-binding periplasmic protein | 8  |                       | FNVLASQPADFDRTK          | 178 | 15 | 3  | 17.9   | b7y8y12                                       | 1708.86 | 92.523  | 6142   | 2 | 854.93  | -1.64  |
| [P0A2C5]RBSB_SALTY D-ribose-binding periplasmic protein | 9  |                       | ERGEGFQQAFAAHK           | 164 | 14 | 4  | 30.38  | b10y3y12y13                                   | 1527.76 | 90.773  | 2897   | 2 | 764.38  | -2.64  |
| [P55900]SERC_SALTY Phohoserine aminotransferase         | 1  |                       | AQVFNFSSGPAMLPAEVLK      | 1   | 19 | 11 | 71.25  | b2b3b12b13b17y3y6y13y14y15y19                 | 2006.05 | 91.467  | 43991  | 2 | 1003.53 | 5.42   |
| [P55900]SERC_SALTY Phohoserine aminotransferase         | 2  |                       | AELLYGVIDNSDFYR          | 272 | 15 | 5  | 29.09  | b3b5b11*b11y12                                | 1774.85 | 77.572  | 3869   | 3 | 592.29  | -8.18  |
| [P55900]SERC_SALTY Phohoserine aminotransferase         | 3  |                       | ALTFDMIDFERR             | 348 | 12 | 5  | 35.23  | b5b6b7*b7b12                                  | 1513.75 | 116.040 | 2071   | 2 | 757.38  | 2.66   |
| [P55900]SERC_SALTY Phohoserine aminotransferase         | 4  |                       | ASIYNAMPIEGVK            | 335 | 13 | 5  | 25.15  | b6*b6y7y8*y8                                  | 1392.74 | 76.368  | 6459   | 2 | 696.87  | 15.78  |
| [P55900]SERC_SALTY Phohoserine aminotransferase         | 5  | Carbamidomethyl+C(7)  | LAQQELCDWHGLGTSVMEISHR   | 20  | 22 | 3  | 23.15  | b9b11b12                                      | 2567.18 | 118.976 | 6394   | 3 | 856.40  | -11.03 |
| [P55900]SERC_SALTY Phohoserine aminotransferase         | 6  |                       | MAQVFNFSSGPAMLPAEVLK     | 0   | 20 | 4  | 22.32  | b4b8b16y14                                    | 2137.12 | 90.156  | 6374   | 2 | 1069.06 | 16.11  |
| [P55900]SERC_SALTY Phohoserine aminotransferase         | 7  |                       | MNVPFQLADNTLDK           | 297 | 14 | 3  | 19.04  | b6b11y3                                       | 1605.79 | 75.421  | 2894   | 2 | 803.40  | -4.71  |
| [P55900]SERC_SALTY Phohoserine aminotransferase         | 8  |                       | EFIQVAEEAEQDFR           | 44  | 14 | 7  | 56.13  | b6b8*b8b10b13y6y11                            | 1710.83 | 125.987 | 1757   | 3 | 570.95  | 16.63  |
| [P55900]SERC_SALTY Phohoserine aminotransferase         | 9  | Carbamidomethyl+C(4)  | VLFCGGGGR                | 68  | 9  | 3  | 37.96  | y5y7y8                                        | 1002.48 | 120.417 | 1573   | 1 | 1002.48 | -15.10 |
| [P55900]SERC_SALTY Phohoserine aminotransferase         | 10 | Carbamidomethyl+C(3)  | KYCAPQIIDAK              | 111 | 11 | 4  | 24.02  | b5b10y10*y10                                  | 1306.69 | 47.885  | 12039  | 2 | 653.85  | 8.97   |
| [P55900]SERC_SALTY Phohoserine aminotransferase         | 11 | Carbamidomethyl+C(4)  | VLFCGGGGRQFAGVPLNLLGDK   | 68  | 23 | 5  | 36.97  | b4b5b7b10b15                                  | 2412.24 | 92.609  | 10675  | 2 | 1206.63 | -7.19  |
| [P55900]SERC_SALTY Phohoserine aminotransferase         | 12 | Carbamidomethyl+C(14) | DLNIPSNYKVLFCGGGGR       | 58  | 19 | 3  | 14.74  | b4y5y11                                       | 2160.11 | 84.995  | 2687   | 2 | 1080.56 | 1.92   |
| [P55900]SERC_SALTY Phohoserine aminotransferase         | 13 |                       | AELLYGVIDNSDFYRNDVAQANR  | 272 | 23 | 6  | 21.93  | b13*b13*b13y13y14*y14                         | 2643.27 | 79.462  | 2050   | 2 | 1322.14 | -2.31  |
| [P55900]SERC_SALTY Phohoserine aminotransferase         | 14 |                       | ASIYNAMPIEGVKALTFDMIDFER | 335 | 24 | 5  | 16.61  | b8*b8b12y5y7                                  | 2731.37 | 118.172 | 1544   | 3 | 911.13  | 10.19  |
| [Q7CPL5]RL14_SALTY 50S ribosomal protein L14            | 1  |                       | MIQEQTMLNVADNSGAR        | 0   | 17 | 18 | 108.43 | b2b3b5b7b12b13*b13b17y1y5y6y7y8y9*y9*y9y12y17 | 1877.89 | 58.922  | 101865 | 2 | 939.45  | 4.94   |
| [Q7CPL5]RL14_SALTY 50S ribosomal protein L14            | 2  |                       | IISLAPEVL                | 114 | 9  | 4  | 30.18  | b5y4y5y9                                      | 954.58  | 85.460  | 67128  | 1 | 954.58  | -5.18  |
| [Q7CPL5]RL14_SALTY 50S ribosomal protein L14            | 3  |                       | IQEQTMLNVADNSGAR         | 1   | 16 | 12 | 59.28  | b3*b3*b3b5*b5b7*b7b9y1y7y8y11                 | 1746.85 | 94.652  | 14982  | 2 | 873.93  | 1.75   |
| [Q7CPL5]RL14_SALTY 50S ribosomal protein L14            | 4  |                       | IFGPVTR                  | 98  | 7  | 3  | 40.15  | y3y5y6                                        | 789.45  | 45.063  | 91775  | 2 | 395.23  | -18.25 |
| [Q7CPL5]RL14_SALTY 50S ribosomal protein L14            | 5  | Carbamidomethyl+C(6)  | FDGNACVILNNSEQPIGTR      | 78  | 20 | 4  | 24.95  | b7y3y11y12                                    | 2219.07 | 59.083  | 15437  | 2 | 1110.04 | 6.71   |
| [Q7CPL5]RL14_SALTY 50S ribosomal protein L14            | 6  | Carbamidomethyl+C(3)  | VMCIK                    | 18  | 5  | 3  | 39.32  | b3y3y4                                        | 650.33  | 40.149  | 12763  | 1 | 650.33  | -11.92 |
| [Q7CPL5]RL14_SALTY 50S ribosomal protein L14            | 7  | Oxidation+M(1)        | MIQEQTMLNVADNSGAR        | 0   | 17 | 9  | 42.19  | b8b10*b10y6y9*y9y10*y10y13                    | 1893.90 | 121.317 | 5509   | 2 | 947.46  | 13.34  |
| [Q7CPL5]RL14_SALTY 50S ribosomal protein L14            | 8  | Oxidation+M(7)        | MIQEQTMLNVADNSGARR       | 0   | 18 | 4  | 21.42  | b4b10y7y13                                    | 2049.98 | 68.439  | 4402   | 2 | 1025.49 | 0.95   |

|                                                 |    |                                                |                                               |     |    |   |       |                          |         |         |       |   |         |        |
|-------------------------------------------------|----|------------------------------------------------|-----------------------------------------------|-----|----|---|-------|--------------------------|---------|---------|-------|---|---------|--------|
| Q7CPP7 RL21_SALTY 50S ribosomal protein L21     | 1  |                                                | MYAVFQSGGK                                    | 0   | 10 | 7 | 39.72 | b2b3y1y3y4y7y10          | 1087.52 | 52.437  | 78089 | 2 | 544.26  | -6.96  |
| Q7CPP7 RL21_SALTY 50S ribosomal protein L21     | 2  |                                                | VSEGTQTVR                                     | 13  | 8  | 5 | 40.56 | b2y5y6y7y8               | 875.45  | 16.161  | 4669  | 2 | 438.23  | -3.83  |
| Q7CPP7 RL21_SALTY 50S ribosomal protein L21     | 3  |                                                | IGVPFVDGGVIK                                  | 48  | 12 | 3 | 29.21 | y5y6y8                   | 1200.69 | 77.010  | 35715 | 2 | 600.85  | -6.91  |
| Q7CPP7 RL21_SALTY 50S ribosomal protein L21     | 4  |                                                | QQGHRQWFTDVK                                  | 85  | 12 | 3 | 29.21 | y6y7y11                  | 1529.75 | 70.688  | 21482 | 2 | 765.38  | -6.78  |
| P26982 DEGP_SALTY Protease do                   | 1  |                                                | AGDVITSLNGKPISSFAALR                          | 332 | 20 | 8 | 33.04 | b1b3°b3y1y3y7y9y15       | 2017.09 | 75.014  | 25865 | 3 | 673.03  | -11.01 |
| P26982 DEGP_SALTY Protease do                   | 2  |                                                | NLTSQMVEYGVVK                                 | 275 | 13 | 7 | 40.85 | b5b6b11y9y11°y11y13      | 1496.74 | 57.959  | 24870 | 2 | 748.88  | 1.14   |
| P26982 DEGP_SALTY Protease do                   | 3  |                                                | GAFVSQVMPNSSAAK                               | 313 | 15 | 9 | 43.44 | b3y1y2y7y8y9y11°y11y15   | 1493.74 | 53.243  | 17199 | 2 | 747.38  | 0.82   |
| P26982 DEGP_SALTY Protease do                   | 4  |                                                | SDIALIQINPK                                   | 160 | 12 | 4 | 35.23 | b2b3b4b5                 | 1339.76 | 63.998  | 16417 | 2 | 670.38  | -0.73  |
| P26982 DEGP_SALTY Protease do                   | 5  |                                                | VGDYTVAIGNPFLGETVTSGIVS<br>ALGR               | 186 | 28 | 8 | 35.71 | b3b7b8y3y5°y5y6y28       | 2750.41 | 116.497 | 11315 | 3 | 917.48  | -7.99  |
| P26982 DEGP_SALTY Protease do                   | 6  |                                                | SGLNVENYENFIQTDAAINR                          | 214 | 20 | 5 | 22.32 | b3b5°b5b13y5             | 2268.11 | 77.592  | 7246  | 2 | 1134.56 | 8.18   |
| P26982 DEGP_SALTY Protease do                   | 7  |                                                | VMPSVVSINVEGSTTVNTPR                          | 48  | 20 | 3 | 14.19 | b3b9y12                  | 2087.08 | 64.688  | 6816  | 3 | 696.37  | 1.99   |
| P26982 DEGP_SALTY Protease do                   | 8  |                                                | AQVGTMPVGSK                                   | 352 | 11 | 9 | 81.12 | y3°y3y5y6y8°y8y9y10*y10  | 1074.55 | 34.532  | 13790 | 2 | 537.78  | -5.79  |
| P26982 DEGP_SALTY Protease do                   | 9  |                                                | GELGIMGTELNSELAK                              | 289 | 16 | 4 | 28    | b3b4b7y8                 | 1661.81 | 46.015  | 2577  | 2 | 831.41  | -21.67 |
| P26982 DEGP_SALTY Protease do                   | 10 | Oxidation+M(39)                                | GNSGGALVNLNGELIGINTAILAP<br>DGGNIGIGFAIPSNMVK | 234 | 41 | 5 | 11.86 | b8°b8b14y4y8             | 3965.06 | 103.567 | 6316  | 3 | 1322.36 | -5.73  |
| P26982 DEGP_SALTY Protease do                   | 11 |                                                | GAFVSQVMPNSSAAK                               | 313 | 15 | 0 | 4.15  |                          | 1476.73 | 53.229  | 4772  | 2 | 738.87  | 12.73  |
| P67093 UG_SALTY Universal stress protein G      | 1  |                                                | TIIMPVDVFEMELSDK                              | 3   | 16 | 7 | 34.98 | b2b3b12y6y12y13y16       | 1866.93 | 104.659 | 55664 | 2 | 933.97  | 5.56   |
| P67093 UG_SALTY Universal stress protein G      | 2  |                                                | NPSITHTLLGSNASSVVR                            | 114 | 18 | 5 | 34.29 | b5°b5b6b7°b7             | 1852.97 | 59.150  | 29118 | 3 | 618.33  | -10.28 |
| P67093 UG_SALTY Universal stress protein G      | 3  |                                                | LQTMVGHFSDPSR                                 | 69  | 14 | 3 | 19.04 | b12y8y12                 | 1587.77 | 64.811  | 50905 | 3 | 529.93  | -13.99 |
| P67093 UG_SALTY Universal stress protein G      | 4  |                                                | DVVNEMGEELDADVVVIGSR                          | 94  | 20 | 5 | 14.19 | b3b5°b5°b5y14            | 2146.06 | 91.958  | 4285  | 2 | 1073.54 | 14.68  |
| P67093 UG_SALTY Universal stress protein G      | 5  | Oxidation+M(11)                                | TIIMPVDVFEMELSDK                              | 3   | 16 | 5 | 40.85 | b11b12y3y5y10            | 1882.94 | 77.492  | 2231  | 3 | 628.32  | 12.77  |
| Q08016 OTC_SALTY Ornithine carbamoyltransferase | 1  | Carbamidomethyl+C(2);<br>Carbamidomethyl+C(12) | ACWPQAALVAECSAMAKK                            | 190 | 18 | 6 | 15.37 | b1b13y7y10°y10y18        | 1991.93 | 74.692  | 24426 | 3 | 664.65  | -9.25  |
| Q08016 OTC_SALTY Ornithine carbamoyltransferase | 2  | Carbamidomethyl+C(4)                           | FLHCLPAFHDDETTLGKK                            | 270 | 18 | 4 | 9.32  | b3b10°y9°y9              | 2129.06 | 117.003 | 16977 | 3 | 710.36  | 4.01   |
| Q08016 OTC_SALTY Ornithine carbamoyltransferase | 3  |                                                | DYQVNSQMMALTGNPQVK                            | 252 | 18 | 9 | 67.06 | b5b12b14y4y8y11y13y16y18 | 2023.97 | 64.937  | 15639 | 2 | 1012.49 | 5.25   |
| Q08016 OTC_SALTY Ornithine carbamoyltransferase | 4  |                                                | AFNEMTLVYAGDAR                                | 152 | 14 | 9 | 53.12 | b9b13y2y3°y3y5y6y7y14    | 1557.76 | 69.640  | 14159 | 2 | 779.38  | 12.85  |
| Q08016 OTC_SALTY Ornithine carbamoyltransferase | 5  |                                                | GADFIYTDVWVSMGEPKEK                           | 224 | 19 | 3 | 22.52 | b12b13y8                 | 2172.04 | 102.360 | 2773  | 3 | 724.69  | 5.17   |
| Q08016 OTC_SALTY Ornithine carbamoyltransferase | 6  |                                                | GADFIYTDVWVSMGEPK                             | 224 | 17 | 3 | 16.1  | b4y4y9                   | 1914.90 | 97.195  | 2188  | 3 | 638.97  | 4.97   |
| Q08016 OTC_SALTY Ornithine carbamoyltransferase | 7  | Carbamidomethyl+C(2);<br>Carbamidomethyl+C(12) | ACWPQAALVAECSAMAK                             | 190 | 17 | 4 | 16.1  | b12°b12y6y14             | 1863.87 | 73.307  | 17663 | 2 | 932.44  | 5.89   |
| Q08016 OTC_SALTY Ornithine carbamoyltransferase | 8  | Carbamidomethyl+C(4)                           | FLHCLPAFHDDETTLGK                             | 270 | 17 | 3 | 16.1  | b4b9y10                  | 2001.00 | 79.692  | 4453  | 3 | 667.67  | 21.47  |
| Q08016 OTC_SALTY Ornithine carbamoyltransferase | 9  |                                                | VTYLGSSGSQIGHK                                | 73  | 14 | 5 | 31.17 | b3y4y9°y9y11             | 1433.72 | 45.609  | 1828  | 2 | 717.36  | -12.60 |
| Q08016 OTC_SALTY Ornithine carbamoyltransferase | 10 | Oxidation+M(13)                                | GADFIYTDVWVSMGEPK                             | 224 | 17 | 4 | 25.82 | b5y7y10y12               | 1930.90 | 105.076 | 3293  | 2 | 965.96  | 7.40   |
| Q08016 OTC_SALTY Ornithine carbamoyltransferase | 11 |                                                | QVNSQMMALTGNPQVK                              | 254 | 16 | 0 | 5.39  |                          | 1745.85 | 64.991  | 27025 | 2 | 873.43  | -11.12 |

|                                                                     |   |                       |                                  |     |    |    |       |                                |         |         |       |   |         |        |
|---------------------------------------------------------------------|---|-----------------------|----------------------------------|-----|----|----|-------|--------------------------------|---------|---------|-------|---|---------|--------|
| P63411 ACKA_SALTY Acetate kinase                                    | 1 | Carbamidomethyl+C(7)  | LVLVLNCGSSSLK                    | 4   | 13 | 5  | 38.84 | b3b4y2y8y9                     | 1389.76 | 67.086  | 49930 | 2 | 695.39  | -9.31  |
| P63411 ACKA_SALTY Acetate kinase                                    | 2 |                       | EGTRPAVVIPTNEELVIAQDASR          | 374 | 23 | 11 | 78.07 | b8b9y4y5°y5*y5y6y7y8y14y23     | 2465.29 | 69.036  | 42153 | 3 | 822.44  | -1.98  |
| P63411 ACKA_SALTY Acetate kinase                                    | 3 | Carbamidomethyl+C(19) | FAIDAVNGDEYLSGLAECFHLPEAR        | 17  | 26 | 6  | 12.02 | b2b3y2y4y9y26                  | 2907.39 | 104.806 | 40068 | 3 | 969.80  | -1.60  |
| P63411 ACKA_SALTY Acetate kinase                                    | 4 |                       | LDAVVFTGGIGENAAMVR               | 324 | 18 | 4  | 24.5  | b4b8b12y6                      | 1819.94 | 89.704  | 4731  | 2 | 910.47  | 0.07   |
| P63411 ACKA_SALTY Acetate kinase                                    | 5 |                       | ELSLGKLGVLGFVDHER                | 342 | 18 | 3  | 22.78 | b3y4y5                         | 1998.06 | 68.494  | 4457  | 3 | 666.69  | -5.19  |
| P63411 ACKA_SALTY Acetate kinase                                    | 6 | Oxidation+M(16)       | LDAVVFTGGIGENAAMVR               | 324 | 18 | 4  | 15.37 | b4y11y14°y14                   | 1835.93 | 99.481  | 6878  | 3 | 612.65  | -3.32  |
| P63411 ACKA_SALTY Acetate kinase                                    | 7 | Oxidation+M(9)        | YIGSYTALMDGR                     | 312 | 12 | 3  | 29.21 | b3b4b6                         | 1362.63 | 72.979  | 1676  | 1 | 1362.63 | -2.06  |
| P0A7V6 RS3_SALTY 30S ribosomal protein S3                           | 1 |                       | VVADIAGVPAQINIAEVRKPELDAK        | 89  | 25 | 4  | 26.95 | y3y5y11y17                     | 2616.43 | 70.900  | 39653 | 4 | 654.86  | -14.46 |
| P0A7V6 RS3_SALTY 30S ribosomal protein S3                           | 2 |                       | LVADSITSQLER                     | 114 | 12 | 11 | 78.52 | b2y5y6y8y9°y9y10°y10y11y12*y12 | 1331.71 | 60.492  | 38538 | 2 | 666.36  | -1.83  |
| P0A7V6 RS3_SALTY 30S ribosomal protein S3                           | 3 |                       | ADIDYNTSEAHTTYGVIGVK             | 179 | 20 | 5  | 22.32 | b2b3b4y11y20                   | 2154.03 | 56.281  | 27345 | 3 | 718.68  | -4.19  |
| P0A7V6 RS3_SALTY 30S ribosomal protein S3                           | 4 |                       | GEILGGMAAVEQPEKPAAQPK            | 204 | 21 | 6  | 39.2  | b3°b3b4b6b8b12                 | 2121.11 | 97.857  | 36072 | 3 | 707.71  | 5.76   |
| P0A7V6 RS3_SALTY 30S ribosomal protein S3                           | 5 |                       | LGIVKPWNSTWFANTK                 | 11  | 16 | 5  | 30.45 | b12b13y10y13°y13               | 1862.01 | 113.197 | 1991  | 3 | 621.34  | 5.90   |
| P0A7V6 RS3_SALTY 30S ribosomal protein S3                           | 6 |                       | LGGAEIARTEWYR                    | 156 | 13 | 3  | 25.15 | b11y3y4                        | 1521.76 | 69.588  | 3635  | 2 | 761.38  | -14.12 |
| P0A7V6 RS3_SALTY 30S ribosomal protein S3                           | 7 |                       | LVADSITSQLER                     | 114 | 12 | 0  | 2.9   |                                | 1314.68 | 60.465  | 24808 | 2 | 657.85  | -2.04  |
| P10367 HIS2_SALTY Histidine biosynthesis bifunctional protein hisIE | 1 |                       | TDGLMPAIVQHAVSGEVLM LGY MNPQALDK | 14  | 30 | 5  | 11.3  | b12y11y27°y27y30               | 3198.59 | 136.544 | 16770 | 4 | 800.40  | -2.44  |
| P10367 HIS2_SALTY Histidine biosynthesis bifunctional protein hisIE | 2 |                       | TADPTSSYTAK                      | 126 | 11 | 8  | 51.99 | b1b3b8y7y8y9°y9y11             | 1141.54 | 26.487  | 15392 | 2 | 571.27  | -1.28  |
| P10367 HIS2_SALTY Histidine biosynthesis bifunctional protein hisIE | 3 |                       | TIESGHVTFFSR                     | 44  | 12 | 3  | 22.01 | b7y9y11                        | 1380.69 | 97.522  | 23089 | 2 | 690.85  | 1.59   |
| P10367 HIS2_SALTY Histidine biosynthesis bifunctional protein hisIE | 4 |                       | VGEEGVETALAATVNDR                | 149 | 17 | 4  | 16.1  | b4b7y5*y5                      | 1730.86 | 124.071 | 2383  | 2 | 865.93  | 2.12   |
| P10367 HIS2_SALTY Histidine biosynthesis bifunctional protein hisIE | 5 |                       | ELDWEK                           | 8   | 6  | 2  | 13.52 | y3°y3                          | 819.39  | 84.339  | 2297  | 1 | 819.39  | 6.85   |
| P10367 HIS2_SALTY Histidine biosynthesis bifunctional protein hisIE | 6 |                       | IAQKVGEEGVETALAATVNDR            | 145 | 21 | 4  | 13.7  | b11y4y7*y7                     | 2171.13 | 67.609  | 77834 | 3 | 724.38  | 1.12   |
| P10367 HIS2_SALTY Histidine biosynthesis bifunctional protein hisIE | 7 |                       | KTADPTSSYTAK                     | 125 | 12 | 3  | 22.01 | b7b9y10                        | 1269.62 | 79.656  | 21389 | 2 | 635.31  | -12.98 |
| P10367 HIS2_SALTY Histidine biosynthesis bifunctional protein hisIE | 8 | Oxidation+M(23)       | TDGLMPAIVQHAVSGEVLM LGY MNPQALDK | 14  | 30 | 7  | 24.45 | b11b14°b14y7y10*y10y11         | 3214.60 | 115.602 | 2513  | 3 | 1072.20 | 0.76   |
| Q8ZPD6 YNCE_SALTY Uncharacterized protein yncE                      | 1 |                       | TFDTPPTYNSLALSADGK               | 308 | 18 | 4  | 15.37 | b4y11y14y18                    | 1897.92 | 65.434  | 28931 | 2 | 949.47  | 2.89   |
| Q8ZPD6 YNCE_SALTY Uncharacterized protein yncE                      | 2 |                       | EQEATQPDDVIR                     | 338 | 12 | 6  | 68.43 | y3y4y6y8y10°y10                | 1400.67 | 39.192  | 23712 | 2 | 700.84  | 1.74   |
| Q8ZPD6 YNCE_SALTY Uncharacterized protein yncE                      | 3 |                       | LLDDGKEHFFINLSLDTAGHR            | 223 | 21 | 6  | 13.7  | b7y1y7°y7y13y21                | 2398.19 | 82.583  | 23132 | 2 | 1199.60 | -8.96  |

|                                                                |   |                       |                                         |     |    |   |       |                                |         |         |        |   |         |        |
|----------------------------------------------------------------|---|-----------------------|-----------------------------------------|-----|----|---|-------|--------------------------------|---------|---------|--------|---|---------|--------|
| Q8ZPD6 YNCE_SALTY Uncharacterized protein yncE                 | 4 |                       | LYTTNADGEFTIDTASNK                      | 198 | 19 | 6 | 25.56 | b11°b11y6y13y14y19             | 2074.00 | 65.320  | 13281  | 2 | 1037.50 | 1.65   |
| Q8ZPD6 YNCE_SALTY Uncharacterized protein yncE                 | 5 |                       | ELVADAATNTIYISGVGK                      | 144 | 18 | 4 | 24.29 | b6b13°b13b14                   | 1821.95 | 73.181  | 30053  | 3 | 607.99  | -7.64  |
| Q8ZPD6 YNCE_SALTY Uncharacterized protein yncE                 | 6 |                       | AQRLYTTNADGEFTIDTASNK                   | 195 | 22 | 9 | 39.24 | b5b14°*b14b15°b15y5y7y8°<br>y8 | 2429.21 | 93.593  | 6765   | 2 | 1215.11 | 8.24   |
| Q8ZPD6 YNCE_SALTY Uncharacterized protein yncE                 | 7 |                       | DDGKEHFFINLSLDTAGHR                     | 225 | 19 | 2 | 7.7   | b15°b15                        | 2172.08 | 82.531  | 1882   | 3 | 724.70  | 13.60  |
| P67179 YEBC_SALTY UPF0082 protein yebC                         | 1 |                       | LGGGDPDANPR                             | 37  | 11 | 7 | 81.12 | b2y4y5y6y7y9y10                | 1068.50 | 22.634  | 20240  | 2 | 534.75  | -8.23  |
| P67179 YEBC_SALTY UPF0082 protein yebC                         | 2 |                       | ADMDAETAPK                              | 205 | 10 | 4 | 33.61 | y2y4y6y7                       | 1048.46 | 25.038  | 12082  | 2 | 524.73  | -0.47  |
| P67179 YEBC_SALTY UPF0082 protein yebC                         | 3 | Carbamidomethyl+C(1)  | CGGNLGTGDSVAYLFSK                       | 119 | 17 | 5 | 23.09 | b14°*b14y11y12°y12             | 1745.82 | 86.700  | 3652   | 2 | 873.41  | 0.35   |
| P67179 YEBC_SALTY UPF0082 protein yebC                         | 4 |                       | ELVTAAKLGGGDPDANPR                      | 30  | 18 | 4 | 26.26 | b16y8y9y12                     | 1780.92 | 79.449  | 724801 | 3 | 594.31  | -1.44  |
| P67179 YEBC_SALTY UPF0082 protein yebC                         | 5 |                       | DALEAAGLKADSAEVSMPSTK                   | 183 | 22 | 5 | 20.59 | b3b6b12°b12y4                  | 2204.10 | 67.724  | 18281  | 3 | 735.37  | -4.98  |
| Q8ZRP3 DXR_SALTY 1-deoxy-D-xylulose 5-phohate reductoisomerase | 1 | Carbamidomethyl+C(11) | VTSGAQPLDFCK                            | 289 | 12 | 7 | 60.65 | b2y5y6y7°y7y10y11              | 1322.63 | 54.621  | 33096  | 3 | 441.55  | -8.31  |
| Q8ZRP3 DXR_SALTY 1-deoxy-D-xylulose 5-phohate reductoisomerase | 2 |                       | ISVDSATMMNK                             | 217 | 11 | 4 | 27.03 | b5y3y4y11                      | 1196.57 | 70.498  | 2839   | 3 | 399.53  | 8.16   |
| Q8ZRP3 DXR_SALTY 1-deoxy-D-xylulose 5-phohate reductoisomerase | 3 |                       | HPNWSMGR                                | 208 | 8  | 3 | 40.56 | y3y4y7                         | 984.47  | 59.022  | 10790  | 2 | 492.74  | 21.58  |
| Q8ZRP3 DXR_SALTY 1-deoxy-D-xylulose 5-phohate reductoisomerase | 4 |                       | QMEVLIHPQSVIHSMVR                       | 244 | 17 | 5 | 35.7  | b3b5b9b10y4                    | 2004.02 | 72.061  | 5034   | 2 | 1002.52 | -13.64 |
| Q8ZRP3 DXR_SALTY 1-deoxy-D-xylulose 5-phohate reductoisomerase | 5 |                       | IMLQQHGSR                               | 66  | 9  | 4 | 30.18 | b5°*b5y4y5                     | 1069.54 | 14.366  | 3554   | 2 | 535.27  | -19.74 |
| Q8ZRP3 DXR_SALTY 1-deoxy-D-xylulose 5-phohate reductoisomerase | 6 |                       | YQDGSVLAQLGEPDMRTPIAHTM<br>AWPNR        | 261 | 28 | 6 | 14.69 | b10b13°*b13y3°*y3y6            | 3154.49 | 102.596 | 16919  | 4 | 789.38  | -7.97  |
| Q8ZRP3 DXR_SALTY 1-deoxy-D-xylulose 5-phohate reductoisomerase | 7 |                       | YAVMDDTSSAEQLKIMLQQHGSR                 | 52  | 23 | 4 | 19.85 | b3y5y7y20                      | 2608.29 | 76.282  | 8588   | 4 | 652.83  | 14.23  |
| Q8ZRP3 DXR_SALTY 1-deoxy-D-xylulose 5-phohate reductoisomerase | 8 | Oxidation+M(2)        | QMEVLIHPQSVIHSMVR                       | 244 | 17 | 3 | 23.09 | b10b11y11                      | 2020.06 | 80.895  | 6499   | 3 | 674.02  | 4.89   |
| P26366 AMIB_SALTY N-acetylmuramoyl-L-alanine amidase amiB      | 1 |                       | SPDIPSILVETGFISNHGEER                   | 366 | 21 | 8 | 21.41 | b1b2b4b7b13y1y6°*y6            | 2297.14 | 120.593 | 10497  | 3 | 766.38  | -2.34  |
| P26366 AMIB_SALTY N-acetylmuramoyl-L-alanine amidase amiB      | 2 |                       | VESAPRPTEPAR                            | 140 | 12 | 8 | 25.99 | b2b5°b5y1y3y4°y4y12            | 1309.69 | 12.490  | 5815   | 3 | 437.23  | 0.56   |
| P26366 AMIB_SALTY N-acetylmuramoyl-L-alanine amidase amiB      | 3 |                       | QSELLGGAGDVLANSQSDPYLSQ<br>AVLDLQFGHSQR | 298 | 35 | 6 | 36.4  | b9b14°*b14b15b16°*b16          | 3700.77 | 116.139 | 3257   | 3 | 1234.26 | -14.58 |
| P26366 AMIB_SALTY N-acetylmuramoyl-L-alanine amidase amiB      | 4 |                       | DAQSLR                                  | 91  | 6  | 2 | 13.52 | y4°y4                          | 689.36  | 36.682  | 6113   | 1 | 689.36  | 5.67   |
| P26366 AMIB_SALTY N-acetylmuramoyl-L-alanine amidase amiB      | 5 | Carbamidomethyl+C(11) | NAVIAALILLCAQAGAASLSDIQVS<br>NGEQAR     | 6   | 32 | 5 | 21.53 | b3y4°*y4y5y8                   | 3252.64 | 107.401 | 5489   | 3 | 1084.89 | -17.41 |

|                                                           |    |                       |                                    |     |    |    |       |                                         |         |         |        |   |         |        |
|-----------------------------------------------------------|----|-----------------------|------------------------------------|-----|----|----|-------|-----------------------------------------|---------|---------|--------|---|---------|--------|
| P26366 AMIB_SALTY N-acetylmuramoyl-L-alanine amidase amiB | 6  |                       | QNaNFLVSIHADAAPNR                  | 253 | 17 | 5  | 25.82 | b5y6*y6y12y14                           | 1837.90 | 79.285  | 3683   | 2 | 919.45  | -18.20 |
| P26366 AMIB_SALTY N-acetylmuramoyl-L-alanine amidase amiB | 7  |                       | VGYDVATNVLSQLDGVGSLHK              | 333 | 21 | 4  | 35.54 | b13b14y11y12                            | 2172.08 | 105.926 | 2237   | 3 | 724.70  | -21.69 |
| P26366 AMIB_SALTY N-acetylmuramoyl-L-alanine amidase amiB | 8  |                       | YQQQIADAIYRGLR                     | 393 | 14 | 4  | 27.61 | b6b8°b8b12                              | 1694.88 | 126.011 | 9352   | 2 | 847.94  | -9.29  |
| P26366 AMIB_SALTY N-acetylmuramoyl-L-alanine amidase amiB | 9  |                       | SSDDRLTGVTSSNTVTRPAAR              | 156 | 21 | 4  | 30.52 | b7b9b11b15                              | 2191.09 | 82.697  | 4150   | 3 | 731.04  | -5.57  |
| P26366 AMIB_SALTY N-acetylmuramoyl-L-alanine amidase amiB | 10 |                       | RANSEMANWLEQHEK                    | 283 | 15 | 8  | 36.63 | b5b11y4°y4y8°y8y9°y9                    | 1842.88 | 127.142 | 1821   | 2 | 921.94  | 10.93  |
| P26366 AMIB_SALTY N-acetylmuramoyl-L-alanine amidase amiB | 11 | Phosphoryl STY(20)    | YFAAHPIQSAPQGGPGQTASTNQP<br>GAITAA | 408 | 31 | 6  | 24.12 | b6b12°b12y10y11y13_H3P<br>O4 y13        | 3103.41 | 118.267 | 11926  | 2 | 1552.21 | -3.07  |
| P26366 AMIB_SALTY N-acetylmuramoyl-L-alanine amidase amiB | 12 | Oxidation+M(14)       | GVLTRDGDYFISVMGR                   | 231 | 16 | 4  | 27.33 | b13y3y5y8                               | 1801.91 | 90.030  | 3291   | 2 | 901.46  | 11.72  |
| Q7CR64 YAEH_SALTY UPF0325 protein yaeH                    | 1  |                       | TVVADGIGQGYK                       | 55  | 12 | 9  | 47.54 | b1b2y5y6y8*y8y9°y9y12                   | 1207.61 | 31.641  | 73995  | 2 | 604.31  | -14.25 |
| Q7CR64 YAEH_SALTY UPF0325 protein yaeH                    | 2  | Carbamidomethyl+C(10) | YVIDELDQICQRDR                     | 77  | 14 | 6  | 46.34 | b6b8y2y5y6y7                            | 1822.89 | 81.958  | 40016  | 3 | 608.30  | 6.16   |
| Q7CR64 YAEH_SALTY UPF0325 protein yaeH                    | 3  | Carbamidomethyl+C(10) | YVIDELDQICQR                       | 77  | 12 | 8  | 49.68 | b9b11y8°y8°y8y9y10y12                   | 1551.77 | 68.164  | 13357  | 2 | 776.39  | 11.72  |
| Q7CR64 YAEH_SALTY UPF0325 protein yaeH                    | 4  |                       | HLESVVANKISEIADLDK                 | 105 | 19 | 3  | 22.52 | b3y9y10                                 | 2110.10 | 85.375  | 21668  | 3 | 704.04  | -3.59  |
| Q7CR64 YAEH_SALTY UPF0325 protein yaeH                    | 5  | Carbamidomethyl+C(10) | YVIDELDQICQRDR                     | 77  | 14 | 4  | 19.04 | b10y9°y9y11                             | 1822.87 | 55.183  | 10420  | 2 | 911.94  | -4.42  |
| Q7CR64 YAEH_SALTY UPF0325 protein yaeH                    | 6  |                       | TVVADGIGQGYK                       | 55  | 12 | 0  | 2.9   |                                         | 1189.60 | 31.667  | 2126   | 3 | 397.21  | -12.31 |
| P66955 TALB_SALTY Transaldolase B                         | 1  |                       | LYQPQDATTNPSLILNAAQIPEYR           | 25  | 24 | 9  | 32.07 | b4b7b9b13*b13y2y4y7y24                  | 2716.39 | 81.463  | 11894  | 3 | 906.13  | -2.88  |
| P66955 TALB_SALTY Transaldolase B                         | 2  |                       | LYNDAGISNDR                        | 117 | 11 | 5  | 36.34 | b7y4y9*y9y10                            | 1237.59 | 35.846  | 10596  | 2 | 619.30  | 3.65   |
| P66955 TALB_SALTY Transaldolase B                         | 3  | Carbamidomethyl+C(2)  | ACAEAGVYLISPFVGR                   | 165 | 16 | 3  | 16.93 | b10b15y6                                | 1709.88 | 86.765  | 10054  | 2 | 855.44  | 7.85   |
| P66955 TALB_SALTY Transaldolase B                         | 4  |                       | DYAPAEDPGVVSVTEIYEYYK              | 193 | 21 | 5  | 40.49 | b11b12b13y4y6                           | 2408.13 | 92.680  | 6944   | 3 | 803.38  | 6.79   |
| P66955 TALB_SALTY Transaldolase B                         | 5  |                       | KDYAPAEDPGVVSVTEIYEYYK             | 192 | 22 | 4  | 13.27 | b4b15°b15y5                             | 2536.22 | 91.510  | 1933   | 4 | 634.81  | 4.43   |
| P66955 TALB_SALTY Transaldolase B                         | 6  |                       | LSYDTEASIAK                        | 100 | 11 | 3  | 35.78 | y7y8y9                                  | 1197.60 | 44.194  | 12708  | 2 | 599.30  | -0.82  |
| P66955 TALB_SALTY Transaldolase B                         | 7  |                       | ILDWYK                             | 181 | 6  | 1  | 13.52 | b5                                      | 837.45  | 57.476  | 3271   | 2 | 419.23  | -5.76  |
| P66955 TALB_SALTY Transaldolase B                         | 8  |                       | LIDDAVAWAK                         | 50  | 10 | 4  | 26.62 | b4°b4b8y3                               | 1101.59 | 71.871  | 3032   | 2 | 551.30  | -1.33  |
| P66955 TALB_SALTY Transaldolase B                         | 9  |                       | LIDDAVAWAKQSSDR                    | 50  | 16 | 3  | 16.93 | b5b8y5                                  | 1802.90 | 79.426  | 56179  | 3 | 601.64  | 0.74   |
| P66955 TALB_SALTY Transaldolase B                         | 10 |                       | QQSSDRAQQVVDATDK                   | 60  | 16 | 3  | 24.64 | y8y11y15                                | 1775.88 | 74.907  | 7410   | 2 | 888.44  | 14.64  |
| P66955 TALB_SALTY Transaldolase B                         | 11 |                       | AEAGVYLISPFVGR                     | 167 | 14 | 2  | 14.24 | b9b12                                   | 1478.79 | 86.790  | 6278   | 3 | 493.60  | -7.84  |
| P0A2B3 RS7_SALTY 30S ribosomal protein S7                 | 1  |                       | FVNILMVDGKK                        | 25  | 11 | 9  | 64.31 | b3b5b9°b9y3y4y7y11*y11                  | 1263.69 | 67.346  | 110486 | 3 | 421.90  | -14.30 |
| P0A2B3 RS7_SALTY 30S ribosomal protein S7                 | 2  |                       | STAESIVYSALETLAQR                  | 36  | 17 | 14 | 57.35 | b3°b3b7b15°b15y1y2*y2y3<br>y5y6°y6y7y17 | 1838.93 | 107.333 | 32977  | 3 | 613.65  | -11.15 |

|                                                                          |   |                      |                             |     |    |    |       |                                |         |         |        |   |         |        |
|--------------------------------------------------------------------------|---|----------------------|-----------------------------|-----|----|----|-------|--------------------------------|---------|---------|--------|---|---------|--------|
| P0A2B3 RS7_SALTY 30S ribosomal protein S7                                | 3 |                      | FGSELLAK                    | 17  | 8  | 4  | 56.68 | y3y4y6y7                       | 864.47  | 51.637  | 129078 | 2 | 432.74  | -18.00 |
| P0A2B3 RS7_SALTY 30S ribosomal protein S7                                | 4 |                      | WIVEAAR                     | 102 | 7  | 4  | 53.25 | y3y4y5y6                       | 844.45  | 50.505  | 91397  | 2 | 422.73  | -15.18 |
| P0A2B3 RS7_SALTY 30S ribosomal protein S7                                | 5 |                      | NALAMR                      | 96  | 6  | 3  | 39.73 | y3y4y5                         | 675.35  | 35.945  | 5484   | 1 | 675.35  | -9.31  |
| P0A2B3 RS7_SALTY 30S ribosomal protein S7                                | 6 |                      | ILPDPK                      | 11  | 6  | 1  | 13.52 | y4                             | 682.41  | 32.378  | 2097   | 1 | 682.41  | -1.88  |
| P0A2B3 RS7_SALTY 30S ribosomal protein S7                                | 7 |                      | RVGGSTYQVPVEVRPVR           | 78  | 17 | 3  | 24.75 | b6b7b9                         | 1899.04 | 50.519  | 88775  | 3 | 633.68  | -9.26  |
| P0A2B3 RS7_SALTY 30S ribosomal protein S7                                | 8 |                      | SGKSELEAFEVALENVRPTVEVK     | 53  | 23 | 3  | 22.98 | b7b9b10                        | 2531.31 | 91.191  | 5763   | 4 | 633.58  | -11.48 |
| P0A2B3 RS7_SALTY 30S ribosomal protein S7                                | 9 |                      | MAEANKAFAHYR                | 143 | 12 | 3  | 22.01 | b4b9y3                         | 1408.68 | 57.460  | 1615   | 2 | 704.84  | 1.65   |
| P65889 PUR7_SALTY Phohoribosylaminoimidazole-succinocarboxamide synthase | 1 |                      | LAEAGIPTQMER                | 60  | 12 | 12 | 86.95 | b2b3b4b6°b6y6y8y9y10°y10y11y12 | 1315.66 | 49.802  | 72717  | 2 | 658.34  | -1.95  |
| P65889 PUR7_SALTY Phohoribosylaminoimidazole-succinocarboxamide synthase | 2 |                      | TVYSTENPDLLVLEFR            | 13  | 16 | 11 | 45.38 | b1b4°b4b7b12*b12y1y3°y3y4y9    | 1895.98 | 88.668  | 58577  | 2 | 948.49  | 3.61   |
| P65889 PUR7_SALTY Phohoribosylaminoimidazole-succinocarboxamide synthase | 3 | Carbamidomethyl+C(7) | LLSDTECLVK                  | 72  | 10 | 5  | 51.48 | y3y4y5y8°y8                    | 1177.61 | 53.359  | 42368  | 2 | 589.31  | -5.91  |
| P65889 PUR7_SALTY Phohoribosylaminoimidazole-succinocarboxamide synthase | 4 |                      | LWDK                        | 199 | 4  | 2  | 12.69 | y3°y3                          | 561.31  | 31.172  | 15151  | 1 | 561.31  | 9.13   |
| P65889 PUR7_SALTY Phohoribosylaminoimidazole-succinocarboxamide synthase | 5 |                      | ETLDK                       | 203 | 5  | 1  | 13.11 | y4                             | 605.32  | 48.325  | 14040  | 1 | 605.32  | 14.22  |
| P65889 PUR7_SALTY Phohoribosylaminoimidazole-succinocarboxamide synthase | 6 |                      | GMVNNKFNFHIMTK              | 46  | 14 | 3  | 19.04 | b7b10y3                        | 1680.82 | 101.661 | 33650  | 3 | 560.95  | -6.61  |
| P65889 PUR7_SALTY Phohoribosylaminoimidazole-succinocarboxamide synthase | 7 |                      | TVYSTENPDLLVLEFRNDTSAGD GAR | 13  | 26 | 7  | 39.48 | b3b4y3y5°y5y7y23               | 2840.37 | 80.613  | 13477  | 3 | 947.46  | -1.03  |
| P65889 PUR7_SALTY Phohoribosylaminoimidazole-succinocarboxamide synthase | 8 |                      | GEVVLGDEFSPDGSRWLWDK        | 184 | 19 | 4  | 14.74 | b5b9°b9y8                      | 2106.04 | 77.221  | 6049   | 3 | 702.68  | 12.17  |
| P65889 PUR7_SALTY Phohoribosylaminoimidazole-succinocarboxamide synthase | 9 |                      | FNHFIMTKLAEAGIPTQMER        | 52  | 20 | 5  | 19.46 | b4b15y5°y5y7                   | 2334.21 | 41.595  | 2802   | 3 | 778.74  | 14.64  |
| P25924 CYSG_SALTY Siroheme synthase                                      | 1 | Carbamidomethyl+C(4) | DRDCLIVGGGDVAER             | 11  | 15 | 4  | 25.98 | b6°b6b7b9                      | 1631.78 | 47.098  | 17447  | 2 | 816.39  | -2.99  |
| P25924 CYSG_SALTY Siroheme synthase                                      | 2 |                      | GLQQIQQADIVVYDR             | 234 | 15 | 3  | 25.98 | b6b9b14                        | 1745.93 | 87.854  | 8602   | 2 | 873.47  | 4.33   |
| P25924 CYSG_SALTY Siroheme synthase                                      | 3 |                      | AVNATTER                    | 198 | 8  | 3  | 32.78 | b4y6y7                         | 861.44  | 24.732  | 6928   | 2 | 431.22  | -2.27  |
| P25924 CYSG_SALTY Siroheme synthase                                      | 4 |                      | LIAFGMQADMPVALVENGTSVK      | 393 | 22 | 4  | 23.15 | b1b11b12b14                    | 2291.19 | 101.617 | 4119   | 2 | 1146.10 | 5.22   |
| P25924 CYSG_SALTY Siroheme synthase                                      | 5 |                      | QTLVFYMGLENQAATIQEK         | 375 | 18 | 4  | 24.29 | b7b8°b8b12                     | 2055.05 | 115.358 | 1700   | 3 | 685.69  | -5.35  |
| P25924 CYSG_SALTY Siroheme synthase                                      | 6 |                      | LFSEPLDHR                   | 206 | 9  | 3  | 30.18 | b5b8y8                         | 1113.56 | 111.433 | 1702   | 1 | 1113.56 | -12.17 |
| P25924 CYSG_SALTY Siroheme synthase                                      | 7 |                      | LAQSLANADEKAVNATTER         | 187 | 19 | 4  | 20.39 | b6b11y4y13                     | 2002.03 | 53.402  | 16247  | 2 | 1001.52 | 3.66   |
| P25924 CYSG_SALTY Siroheme synthase                                      | 8 |                      | FWEKFFVNDR                  | 177 | 10 | 5  | 28.38 | b8°b8b9y6*y6                   | 1387.66 | 62.993  | 7671   | 2 | 694.33  | -12.58 |
| P25924 CYSG_SALTY Siroheme synthase                                      | 9 | Carbamidomethyl+C(3) | IFCNVVDAPKAASFIMPSIIDR      | 97  | 22 | 7  | 30.27 | b5b7b10°b10*b10b13y3           | 2464.26 | 136.321 | 7660   | 3 | 822.09  | -4.06  |



|                                                                |    |                                                                   |                                      |     |    |    |       |                                      |         |         |        |   |         |        |
|----------------------------------------------------------------|----|-------------------------------------------------------------------|--------------------------------------|-----|----|----|-------|--------------------------------------|---------|---------|--------|---|---------|--------|
| P25924 CYSG_SALTY Siroheme synthase                            | 10 | Carbamidomethyl+C(8);<br>Carbamidomethyl+C(15)<br>;Oxidation+M(1) | MDHLPIFCQLRDRDCLIVGGGDV<br>AER       | 0   | 26 | 4  | 18.16 | y5y7°y7y9                            | 3058.43 | 118.364 | 2406   | 2 | 1529.72 | -11.34 |
| P0A7Z7 RPOA_SALTY DNA-directed<br>RNA polymerase subunit alpha | 1  |                                                                   | VTLEPLER                             | 25  | 8  | 6  | 53.67 | y1y3y4y5y6y8                         | 956.53  | 52.170  | 60922  | 2 | 478.77  | -13.02 |
| P0A7Z7 RPOA_SALTY DNA-directed<br>RNA polymerase subunit alpha | 2  | Carbamidomethyl+C(6)                                              | LLVDACYPVER                          | 170 | 12 | 11 | 94.64 | b2y5y6°y6y7y8y9y10y11°y<br>11y12     | 1421.71 | 59.245  | 57607  | 2 | 711.36  | 0.00   |
| P0A7Z7 RPOA_SALTY DNA-directed<br>RNA polymerase subunit alpha | 3  |                                                                   | IHSEEDERPIGR                         | 158 | 12 | 6  | 49.19 | b3°b3b4b5b9y7                        | 1437.72 | 66.022  | 32273  | 2 | 719.36  | 5.01   |
| P0A7Z7 RPOA_SALTY DNA-directed<br>RNA polymerase subunit alpha | 4  |                                                                   | AEAIHYIGDLVQR                        | 271 | 13 | 3  | 25.15 | b7b8y3                               | 1484.81 | 77.673  | 18263  | 2 | 742.91  | 14.96  |
| P0A7Z7 RPOA_SALTY DNA-directed<br>RNA polymerase subunit alpha | 5  |                                                                   | QPEVK                                | 238 | 5  | 1  | 13.11 | b4                                   | 600.33  | 70.759  | 6355   | 1 | 600.33  | -5.69  |
| P0A7Z7 RPOA_SALTY DNA-directed<br>RNA polymerase subunit alpha | 6  | Carbamidomethyl+C(4)                                              | SANCLK                               | 265 | 6  | 1  | 13.52 | b3                                   | 692.34  | 97.997  | 3742   | 1 | 692.34  | 6.61   |
| P0A7Z7 RPOA_SALTY DNA-directed<br>RNA polymerase subunit alpha | 7  |                                                                   | GRGYVPASTR                           | 148 | 10 | 3  | 28.38 | b6y5y6                               | 1063.55 | 74.502  | 10894  | 2 | 532.28  | -12.85 |
| P0A7Z7 RPOA_SALTY DNA-directed<br>RNA polymerase subunit alpha | 8  |                                                                   | GYVPASTRIHSEEDERPIGR                 | 150 | 20 | 4  | 19.46 | b11b17y6y11                          | 2269.13 | 69.250  | 8612   | 3 | 757.05  | -0.22  |
| P14845 CARA_SALTY Carbamoyl-<br>phohate synthase small chain   | 1  |                                                                   | DLPLIASNFR                           | 83  | 10 | 4  | 36.62 | b2y4y5y6                             | 1145.62 | 76.032  | 21469  | 2 | 573.32  | -6.93  |
| P14845 CARA_SALTY Carbamoyl-<br>phohate synthase small chain   | 2  |                                                                   | AFPGLNGMDLAK                         | 148 | 12 | 7  | 33.86 | b6*b6y6y9y10*y10y12                  | 1233.62 | 72.030  | 19718  | 2 | 617.32  | -4.55  |
| P14845 CARA_SALTY Carbamoyl-<br>phohate synthase small chain   | 3  |                                                                   | NVVMITAQNHGFAVDEDSL PANL<br>R        | 302 | 24 | 6  | 12.56 | b1b11b14*b14y10°y10                  | 2611.29 | 82.819  | 9113   | 3 | 871.10  | -0.93  |
| P14845 CARA_SALTY Carbamoyl-<br>phohate synthase small chain   | 4  | Carbamidomethyl+C(6)                                              | GAQNGCIIAGDSPDAK                     | 125 | 16 | 4  | 16.93 | b13y11y13y16                         | 1573.73 | 37.844  | 8564   | 2 | 787.37  | 1.16   |
| P14845 CARA_SALTY Carbamoyl-<br>phohate synthase small chain   | 5  | Carbamidomethyl+C(18)                                             | MNPDGIFLSNGPGDPAPCDYAITA<br>IQK      | 230 | 27 | 11 | 36.76 | b2b8b9b12b14°b14b16y11<br>y13*y13y27 | 2862.35 | 82.915  | 6167   | 2 | 1431.68 | 1.36   |
| P14845 CARA_SALTY Carbamoyl-<br>phohate synthase small chain   | 6  |                                                                   | SEDDLPHFVVAYDFGAKR                   | 185 | 18 | 4  | 22.78 | b11°b11y7y8                          | 2066.01 | 69.655  | 3625   | 3 | 689.34  | 4.02   |
| P14845 CARA_SALTY Carbamoyl-<br>phohate synthase small chain   | 7  | Carbamidomethyl+C(12)                                             | FLETDIPLFGICLGHQLLALASGAK            | 257 | 25 | 9  | 54.53 | b3b5b6b13y4y5y7y14y19                | 2684.44 | 128.509 | 121287 | 3 | 895.49  | -2.73  |
| P14845 CARA_SALTY Carbamoyl-<br>phohate synthase small chain   | 8  |                                                                   | SALLVLEDGTQFHGR                      | 3   | 15 | 5  | 31.46 | b7b14*b14y8y9                        | 1642.87 | 125.108 | 30174  | 2 | 821.94  | 10.48  |
| P14845 CARA_SALTY Carbamoyl-<br>phohate synthase small chain   | 9  |                                                                   | WTQGSWTLK                            | 169 | 9  | 4  | 30.18 | b3b4y8*y8                            | 1106.58 | 34.549  | 7439   | 2 | 553.79  | 12.58  |
| P14845 CARA_SALTY Carbamoyl-<br>phohate synthase small chain   | 10 |                                                                   | AIGATGSAVGEVVFNTSMTGYQEI<br>LTDPSYSR | 18  | 32 | 8  | 30.03 | b4b8°b8b13b15°b15b16y2<br>6          | 3321.59 | 109.972 | 1728   | 3 | 1107.87 | -0.59  |
| P14845 CARA_SALTY Carbamoyl-<br>phohate synthase small chain   | 11 |                                                                   | EVTTAETRYRWTQGSWTLK                  | 160 | 18 | 5  | 40.24 | b4b6b7b8y13                          | 2157.07 | 82.569  | 20657  | 2 | 1079.04 | 4.19   |
| P14845 CARA_SALTY Carbamoyl-<br>phohate synthase small chain   | 12 | Carbamidomethyl+C(8)                                              | EKGAQNGCIIAGDSPDAK                   | 123 | 18 | 3  | 22.78 | b13b14y10                            | 1830.89 | 78.641  | 8558   | 2 | 915.95  | 13.60  |
| P14845 CARA_SALTY Carbamoyl-<br>phohate synthase small chain   | 13 | Oxidation+M(18)                                                   | AIGATGSAVGEVVFNTSMTGYQEI<br>LTDPSYSR | 18  | 32 | 3  | 11.08 | b8y3y8                               | 3337.59 | 129.207 | 2430   | 3 | 1113.20 | 0.37   |
| P14845 CARA_SALTY Carbamoyl-<br>phohate synthase small chain   | 14 |                                                                   | NVVMITAQNHGFAVDEDSL PANL<br>R        | 302 | 24 | 0  | 7.88  |                                      | 2594.24 | 82.800  | 5731   | 2 | 1297.62 | -9.69  |
| Q8ZRM7 DKGB_SALTY 2                                            | 1  |                                                                   | ENLASSLLAQDLHLDAEDK                  | 225 | 19 | 6  | 31.21 | b5°b5b14y7y8y12                      | 2082.06 | 78.676  | 6267   | 2 | 1041.53 | 11.02  |
| Q8ZRM7 DKGB_SALTY 2                                            | 2  |                                                                   | AIAAVGADNIATNQIELSPYLQNR             | 138 | 24 | 4  | 16.61 | b12b14y5y8                           | 2542.34 | 99.770  | 5161   | 3 | 848.12  | 6.05   |

|                                                    |    |                      |                                        |     |    |   |       |                      |         |         |        |   |         |        |
|----------------------------------------------------|----|----------------------|----------------------------------------|-----|----|---|-------|----------------------|---------|---------|--------|---|---------|--------|
| Q8ZRM7 DKGB_SALTY 2                                | 3  |                      | AVDTAQIYDNEAAVGQAIAESGV<br>PR          | 31  | 25 | 4 | 12.27 | b4y11°y11y14         | 2545.24 | 74.504  | 7837   | 3 | 849.08  | -6.71  |
| Q8ZRM7 DKGB_SALTY 2                                | 4  |                      | AHGIHITSYMTLAYGK                       | 169 | 16 | 4 | 16.93 | b8b12°b12y12         | 1762.90 | 81.568  | 4056   | 3 | 588.31  | 5.47   |
| Q8ZRM7 DKGB_SALTY 2                                | 5  | Oxidation+M(14)      | HNATPAQVILAWAMGEGYSVIPSS<br>TRR        | 198 | 27 | 3 | 11.8  | b3b6y14              | 2928.51 | 94.915  | 3167   | 4 | 732.88  | 10.75  |
| Q8ZRM7 DKGB_SALTY 2                                | 6  | Oxidation+M(10)      | AHGIHITSYMTLAYGK                       | 169 | 16 | 3 | 16.93 | b3y4y8               | 1778.88 | 99.017  | 1993   | 3 | 593.63  | -6.24  |
| Q7CPL6 RL18_SALTY 50S ribosomal<br>protein L18     | 1  |                      | VQALADAAR                              | 102 | 9  | 9 | 59.4  | b2°b2b3b7y5y6y7°y7y9 | 914.49  | 31.442  | 149287 | 2 | 457.75  | -13.01 |
| Q7CPL6 RL18_SALTY 50S ribosomal<br>protein L18     | 2  |                      | AIAEQLK                                | 56  | 7  | 6 | 59.27 | b4b6y2y3y5y7         | 772.45  | 32.207  | 29943  | 2 | 386.73  | -13.91 |
| Q7CPL6 RL18_SALTY 50S ribosomal<br>protein L18     | 3  |                      | VQALADAAREAGLQF                        | 102 | 15 | 5 | 17.9  | b2b3y4y6y15          | 1559.80 | 88.691  | 6773   | 3 | 520.61  | -10.57 |
| Q7CPL6 RL18_SALTY 50S ribosomal<br>protein L18     | 4  |                      | EAGLQF                                 | 111 | 6  | 5 | 52.84 | b3b4b5y5*y5          | 664.33  | 61.950  | 75342  | 1 | 664.33  | -4.78  |
| Q7CPL6 RL18_SALTY 50S ribosomal<br>protein L18     | 5  |                      | HIYAQVIAPNGSEVLVAASTVEK                | 33  | 23 | 4 | 22.98 | b5b6b11*b11          | 2396.25 | 83.986  | 9817   | 3 | 799.42  | -11.92 |
| Q7CPL6 RL18_SALTY 50S ribosomal<br>protein L18     | 6  |                      | DAAAAVGKAVAER                          | 68  | 13 | 3 | 20.38 | b4b10y6              | 1228.65 | 51.742  | 19055  | 2 | 614.83  | -7.85  |
| Q8ZQK4 YBJL_SALTY Putative tranort<br>protein ybjL | 1  |                      | GDVLQVSGDAR                            | 351 | 11 | 5 | 55.46 | b10y3y5y6y9          | 1116.56 | 27.317  | 19211  | 2 | 558.78  | -5.69  |
| Q8ZQK4 YBJL_SALTY Putative tranort<br>protein ybjL | 2  |                      | VGPELVAWTDGK                           | 219 | 12 | 8 | 55.51 | b1b2b8b10b11y6y7y10  | 1271.68 | 58.950  | 7881   | 2 | 636.34  | 11.62  |
| Q8ZQK4 YBJL_SALTY Putative tranort<br>protein ybjL | 3  |                      | LQHQDLQ TSAQQIAR                       | 183 | 15 | 5 | 17.9  | b6b12°b12y9*y9       | 1736.90 | 68.485  | 6968   | 3 | 579.64  | -0.28  |
| Q8ZQK4 YBJL_SALTY Putative tranort<br>protein ybjL | 4  |                      | NGKEVFRDLLDMR                          | 287 | 14 | 3 | 19.04 | b10y6y8              | 1707.83 | 76.547  | 4200   | 2 | 854.42  | -8.15  |
| Q8ZQK4 YBJL_SALTY Putative tranort<br>protein ybjL | 5  |                      | YLPK                                   | 179 | 4  | 1 | 12.69 | b3                   | 520.31  | 37.055  | 29504  | 1 | 520.31  | -6.69  |
| Q8ZQK4 YBJL_SALTY Putative tranort<br>protein ybjL | 6  |                      | SQIEMPIDDNVVLNK                        | 336 | 15 | 4 | 17.9  | b7b10°b10y3          | 1714.88 | 82.635  | 14988  | 2 | 857.94  | 6.62   |
| Q8ZQK4 YBJL_SALTY Putative tranort<br>protein ybjL | 7  |                      | LFGWDIGLTAGMLAGSMTSTPVL<br>VGAGDTLR    | 112 | 31 | 4 | 15.99 | b3b8b15y24           | 3107.56 | 96.330  | 7886   | 4 | 777.65  | -8.56  |
| Q8ZQK4 YBJL_SALTY Putative tranort<br>protein ybjL | 8  | Carbamidomethyl+C(2) | TCAPAMEIISDTAR                         | 513 | 14 | 3 | 19.04 | b4b12y11             | 1535.71 | 79.143  | 2464   | 2 | 768.36  | -4.61  |
| Q8ZQK4 YBJL_SALTY Putative tranort<br>protein ybjL | 9  |                      | IVTEEIVVKNHNAVGR                       | 301 | 16 | 3 | 16.93 | b5y3y7               | 1777.98 | 109.043 | 3637   | 3 | 593.33  | -9.20  |
| Q8ZQK4 YBJL_SALTY Putative tranort<br>protein ybjL | 10 | Oxidation+M()        | LFGWDIGLTAGMLAGSMTSTPVL<br>VGAGDTLR    | 112 | 31 | 4 | 36.17 | y5y7y8y9             | 3123.61 | 137.440 | 2109   | 3 | 1041.87 | 7.11   |
| P60726 RL4_SALTY 50S ribosomal<br>protein L4       | 1  |                      | DATGIDPVSLIAFDK                        | 170 | 15 | 5 | 17.9  | b2b5y3y10y15         | 1561.81 | 88.116  | 50012  | 2 | 781.41  | 2.03   |
| P60726 RL4_SALTY 50S ribosomal<br>protein L4       | 2  |                      | QVEEMLA                                | 194 | 7  | 6 | 50.24 | b3b4°b4b6y6y7        | 819.39  | 51.331  | 22906  | 1 | 819.39  | -5.59  |
| P60726 RL4_SALTY 50S ribosomal<br>protein L4       | 3  |                      | DAQSALTVSETTFGR                        | 6   | 15 | 5 | 17.9  | b2°b2b13y4y12        | 1582.79 | 60.874  | 15615  | 2 | 791.90  | 11.41  |
| P60726 RL4_SALTY 50S ribosomal<br>protein L4       | 4  |                      | LKDMALEDVLIITGELDENLFLAA<br>R          | 137 | 25 | 8 | 40.25 | b5b20y2y3y4y5y9*y9   | 2802.51 | 136.416 | 8793   | 3 | 934.84  | 3.57   |
| P60726 RL4_SALTY 50S ribosomal<br>protein L4       | 5  |                      | DAQSALTVSETTFGRDFNEALVH<br>QVVVAYAAGAR | 6   | 34 | 6 | 37.81 | b9°b9b10b12b13y7     | 3593.75 | 103.360 | 6303   | 4 | 899.19  | -14.40 |
| P60726 RL4_SALTY 50S ribosomal<br>protein L4       | 6  |                      | FSVEAPK                                | 123 | 7  | 3 | 40.15 | y3y5y6               | 777.40  | 41.258  | 69456  | 2 | 389.20  | -16.09 |
| P60726 RL4_SALTY 50S ribosomal<br>protein L4       | 7  |                      | DFNEALVHQVVVAYAAGAR                    | 21  | 19 | 3 | 23.92 | y6y7y12              | 2030.06 | 83.926  | 41911  | 3 | 677.36  | 7.94   |
| P60726 RL4_SALTY 50S ribosomal<br>protein L4       | 8  |                      | DATGIDPVSLIAFDKVVMTADAV<br>K           | 170 | 24 | 7 | 28.37 | b3b4°b4b7b9°b9y3     | 2476.30 | 101.989 | 37505  | 3 | 826.10  | -0.79  |
| P60726 RL4_SALTY 50S ribosomal<br>protein L4       | 9  |                      | SGGVTFFAARPQDHSQKVNK                   | 79  | 19 | 3 | 23.92 | b7b8b10              | 2027.05 | 77.677  | 7949   | 3 | 676.35  | 2.95   |
| P60726 RL4_SALTY 50S ribosomal<br>protein L4       | 10 | Phosphoryl STY(9)    | ELVLKDAQSALTVSETTFGR                   | 1   | 20 | 4 | 22.32 | b9y11°y11y12         | 2245.13 | 78.914  | 1571   | 3 | 749.05  | 14.03  |

|                                                                                         |    |                       |                                |     |    |    |       |                              |         |         |        |   |         |        |
|-----------------------------------------------------------------------------------------|----|-----------------------|--------------------------------|-----|----|----|-------|------------------------------|---------|---------|--------|---|---------|--------|
| Q9ZF60 GLTI_SALTY Glutamate/aartate periplasmic-binding protein                         | 1  |                       | VVGYSQDYSNAIVEAVKK             | 61  | 18 | 8  | 30.55 | b6b11y1y4y12*y12y16y18       | 1970.00 | 63.326  | 62144  | 3 | 657.34  | -9.17  |
| Q9ZF60 GLTI_SALTY Glutamate/aartate periplasmic-binding protein                         | 2  |                       | AVAFMMDDALLAGER                | 198 | 15 | 5  | 25.98 | b1y8y11y13y15                | 1609.78 | 84.516  | 53491  | 2 | 805.39  | 6.90   |
| Q9ZF60 GLTI_SALTY Glutamate/aartate periplasmic-binding protein                         | 3  |                       | ESSVPFSYYDNQKK                 | 47  | 14 | 4  | 19.04 | b11y6y10y14                  | 1691.76 | 55.194  | 52615  | 2 | 846.39  | 5.92   |
| Q9ZF60 GLTI_SALTY Glutamate/aartate periplasmic-binding protein                         | 4  |                       | VVGYSQDYSNAIVEAVK              | 61  | 17 | 9  | 48.25 | b2b17y3y4y10*y10y11y15y17    | 1841.94 | 67.735  | 42647  | 2 | 921.47  | 4.84   |
| Q9ZF60 GLTI_SALTY Glutamate/aartate periplasmic-binding protein                         | 5  |                       | AVVVTSGTTSEILLHK               | 154 | 16 | 3  | 23.46 | b3b4y12                      | 1654.92 | 57.884  | 5369   | 3 | 552.31  | -13.35 |
| Q9ZF60 GLTI_SALTY Glutamate/aartate periplasmic-binding protein                         | 6  | Carbamidomethyl+C(19) | KPDNWEIVGKPKQSQEAYGCMLR        | 217 | 22 | 10 | 45.18 | b4*b4b10*b10b11y3y7y8y10*y10 | 2606.26 | 136.334 | 19395  | 3 | 869.42  | 3.47   |
| Q9ZF60 GLTI_SALTY Glutamate/aartate periplasmic-binding protein                         | 7  | Carbamidomethyl+C(13) | IPLLQNGTFDFECGSTNNLER          | 98  | 22 | 4  | 13.27 | b10*b10y9y12                 | 2526.15 | 62.894  | 1974   | 2 | 1263.58 | -18.36 |
| Q9ZF60 GLTI_SALTY Glutamate/aartate periplasmic-binding protein                         | 8  | Carbamidomethyl+C(22) | LIPITSQNRIPLLQNGTFDFECGSTNNLER | 89  | 31 | 5  | 24.91 | b3y6y9y10y12                 | 3548.79 | 86.900  | 125761 | 3 | 1183.60 | 3.03   |
| Q9ZF60 GLTI_SALTY Glutamate/aartate periplasmic-binding protein                         | 9  |                       | AVVVTSGTTSEILLHKLNEEQK         | 154 | 22 | 6  | 38.82 | b3y4y8y17y18y20              | 2396.28 | 63.732  | 25475  | 3 | 799.43  | -9.17  |
| Q9ZF60 GLTI_SALTY Glutamate/aartate periplasmic-binding protein                         | 10 |                       | TLESGRAVAFMMDDALLAGER          | 192 | 21 | 8  | 43.13 | b4*b4b7*b7y3y8y9y10          | 2253.13 | 136.302 | 2947   | 2 | 1127.07 | 14.19  |
| P66431 RS15_SALTY 30S ribosomal protein S15                                             | 1  |                       | YTALIER                        | 77  | 7  | 8  | 53.25 | b7y2°y2y3y4y5y6y7            | 865.47  | 43.077  | 128304 | 2 | 433.24  | -10.93 |
| P66431 RS15_SALTY 30S ribosomal protein S15                                             | 2  |                       | SLSTEATAK                      | 1   | 9  | 5  | 37.96 | b2y3y6y7y9                   | 907.46  | 22.020  | 68765  | 2 | 454.24  | -10.36 |
| P66431 RS15_SALTY 30S ribosomal protein S15                                             | 3  |                       | DVAR                           | 73  | 4  | 1  | 12.69 | b3                           | 460.25  | 30.333  | 9596   | 1 | 460.25  | 2.12   |
| P66431 RS15_SALTY 30S ribosomal protein S15                                             | 4  |                       | STEATAK                        | 3   | 7  | 1  | 8.74  | b4                           | 707.36  | 21.985  | 21224  | 1 | 707.36  | 0.17   |
| P66431 RS15_SALTY 30S ribosomal protein S15                                             | 5  |                       | SLSTEATAK                      | 1   | 9  | 0  | 1.66  |                              | 889.46  | 22.017  | 5203   | 2 | 445.23  | 0.55   |
| Q9L6N1 METE_SALTY 5-methyltetrahydropteroyltriglutamate--homocysteine methyltransferase | 1  | Carbamidomethyl+C(7)  | LWVNPDCGLK                     | 719 | 10 | 6  | 42.73 | b2b4y6y7y8y10                | 1201.61 | 60.773  | 40358  | 2 | 601.31  | 2.84   |
| Q9L6N1 METE_SALTY 5-methyltetrahydropteroyltriglutamate--homocysteine methyltransferase | 2  |                       | LAAITAQDSQRENPYEV              | 395 | 18 | 4  | 22.78 | b11y13y14y18                 | 2061.02 | 47.391  | 28278  | 3 | 687.68  | -5.57  |
| Q9L6N1 METE_SALTY 5-methyltetrahydropteroyltriglutamate--homocysteine methyltransferase | 3  |                       | SDWDAYLEWGVEAFR                | 611 | 15 | 6  | 25.98 | b1y8°y8y10°y10y11            | 1843.83 | 93.624  | 27240  | 3 | 615.28  | 2.98   |
| Q9L6N1 METE_SALTY 5-methyltetrahydropteroyltriglutamate--homocysteine methyltransferase | 4  |                       | QAGIDLLPVGDFAWYDHVLTTSLLGNV    | 52  | 31 | 6  | 39.18 | y2y3y4y6y7y31                | 3351.78 | 119.585 | 25442  | 3 | 1117.93 | 1.09   |
| Q9L6N1 METE_SALTY 5-methyltetrahydropteroyltriglutamate--homocysteine methyltransferase | 5  | Carbamidomethyl+C(11) | GMLTGPVTILCWSFPR               | 549 | 16 | 5  | 16.93 | b6b13y2y8y16                 | 1834.95 | 99.524  | 18817  | 2 | 917.98  | 6.05   |
| Q9L6N1 METE_SALTY 5-methyltetrahydropteroyltriglutamate--homocysteine methyltransferase | 6  | Carbamidomethyl+C(8)  | ALWVASSCSLLHSPIDLSVETR         | 315 | 22 | 4  | 13.27 | b2b9b12y5                    | 2441.24 | 104.343 | 13105  | 4 | 611.07  | -2.20  |

|                                                                                         |    |                                                |                                           |     |    |   |       |              |         |         |       |   |         |        |
|-----------------------------------------------------------------------------------------|----|------------------------------------------------|-------------------------------------------|-----|----|---|-------|--------------|---------|---------|-------|---|---------|--------|
| Q9L6N1 METE_SALTY 5-methyltetrahydropteroyltriglutamate--homocysteine methyltransferase | 7  |                                                | AQESYWAGNTTR                              | 21  | 12 | 4 | 35.23 | y5y6y7*y7    | 1383.63 | 40.734  | 11515 | 2 | 692.32  | 1.85   |
| Q9L6N1 METE_SALTY 5-methyltetrahydropteroyltriglutamate--homocysteine methyltransferase | 8  |                                                | LPAPWTTTIGSFPQTTEIR                       | 422 | 19 | 3 | 14.74 | b4y9y11      | 2116.08 | 78.647  | 6995  | 3 | 706.03  | -12.34 |
| Q9L6N1 METE_SALTY 5-methyltetrahydropteroyltriglutamate--homocysteine methyltransferase | 9  |                                                | DALNSGETAALEEWSAPIQAR                     | 360 | 21 | 3 | 22.15 | b12b13y11    | 2229.10 | 80.237  | 2765  | 3 | 743.71  | 11.94  |
| Q9L6N1 METE_SALTY 5-methyltetrahydropteroyltriglutamate--homocysteine methyltransferase | 10 |                                                | LAAITAQDSQR                               | 395 | 11 | 4 | 24.02 | b3y4°y4y8    | 1173.61 | 48.446  | 4852  | 2 | 587.31  | -13.31 |
| Q9L6N1 METE_SALTY 5-methyltetrahydropteroyltriglutamate--homocysteine methyltransferase | 11 |                                                | ETIAK                                     | 570 | 5  | 1 | 13.11 | y3           | 561.32  | 24.595  | 2671  | 1 | 561.32  | -10.33 |
| Q9L6N1 METE_SALTY 5-methyltetrahydropteroyltriglutamate--homocysteine methyltransferase | 12 |                                                | APTGEPA AAAEMTK                           | 103 | 14 | 3 | 19.04 | b9y6y9       | 1344.65 | 91.656  | 2106  | 3 | 448.89  | -0.45  |
| Q9L6N1 METE_SALTY 5-methyltetrahydropteroyltriglutamate--homocysteine methyltransferase | 13 | Phosphoryl STY(6)                              | YAQSLTDKPVK                               | 538 | 11 | 4 | 24.02 | b4y7y9*y9    | 1329.65 | 79.598  | 7665  | 2 | 665.33  | 8.54   |
| Q7CPZ4 GRPE_SALTY Protein grpE                                                          | 1  |                                                | FVNELLPVIDSLDR                            | 90  | 14 | 5 | 19.04 | b2b5y1y4y8   | 1629.89 | 97.149  | 52997 | 2 | 815.45  | 3.89   |
| Q7CPZ4 GRPE_SALTY Protein grpE                                                          | 2  |                                                | IANLEVQLAEAQTR                            | 43  | 14 | 4 | 32.65 | b3b4y4y11    | 1555.82 | 63.286  | 18549 | 2 | 778.42  | -12.87 |
| Q7CPZ4 GRPE_SALTY Protein grpE                                                          | 3  |                                                | TPEGQAPEEIIIMDQHEEVEAVEPN<br>DSAEQVDPRDEK | 7   | 36 | 5 | 10.88 | b6y2y5y7y36  | 4060.80 | 63.240  | 6311  | 4 | 1015.95 | -5.53  |
| Q7CPZ4 GRPE_SALTY Protein grpE                                                          | 4  |                                                | AEMENLR                                   | 66  | 7  | 3 | 40.15 | b3y4y6       | 862.43  | 80.774  | 3820  | 1 | 862.43  | 19.89  |
| P0A1R4 HIS5_SALTY Imidazole glycerol phohate synthase subunit hisH                      | 1  | Carbamidomethyl+C(10)                          | MNVVILDTGCANLSSVK                         | 0   | 17 | 4 | 23.09 | b2b14y10y11  | 1820.93 | 72.328  | 14127 | 2 | 910.97  | 3.02   |
| P0A1R4 HIS5_SALTY Imidazole glycerol phohate synthase subunit hisH                      | 2  |                                                | MTDFGLPLPHMGWNR                           | 105 | 15 | 5 | 29.09 | b2b10y5y7y8  | 1771.82 | 87.780  | 12966 | 3 | 591.28  | -11.99 |
| P0A1R4 HIS5_SALTY Imidazole glycerol phohate synthase subunit hisH                      | 3  |                                                | LFLPGVGTAQAAMDQLRER                       | 41  | 19 | 4 | 23.34 | b15y5y7y11   | 2073.09 | 84.949  | 10808 | 3 | 691.70  | -1.30  |
| P0A1R4 HIS5_SALTY Imidazole glycerol phohate synthase subunit hisH                      | 4  | Carbamidomethyl+C(2);<br>Carbamidomethyl+C(10) | ACTQPVLGICLGMQLLGR                        | 67  | 18 | 4 | 15.37 | b12b14*b14y3 | 1987.05 | 120.989 | 4980  | 2 | 994.03  | 11.43  |
| P0A1R4 HIS5_SALTY Imidazole glycerol phohate synthase subunit hisH                      | 5  |                                                | GVDLLNIIEQDVPK                            | 91  | 14 | 4 | 19.04 | b3b12*b12y3  | 1552.85 | 101.622 | 35739 | 2 | 776.93  | -2.52  |
| P0A1R4 HIS5_SALTY Imidazole glycerol phohate synthase subunit hisH                      | 6  |                                                | NFLEM                                     | 191 | 5  | 2 | 26.21 | b3b4         | 653.30  | 73.834  | 16332 | 1 | 653.30  | 10.84  |
| P0A1R4 HIS5_SALTY Imidazole glycerol phohate synthase subunit hisH                      | 7  | Carbamidomethyl+C(9)                           | NVVILDTGCANLSSVK                          | 1   | 16 | 4 | 25.31 | b4*b4b14b15  | 1689.92 | 91.174  | 12973 | 2 | 845.46  | 22.18  |
| P0A1R4 HIS5_SALTY Imidazole glycerol phohate synthase subunit hisH                      | 8  |                                                | SGAAGAQLLKNFLEM                           | 181 | 15 | 3 | 23.92 | b3y6y7       | 1549.79 | 102.549 | 2831  | 2 | 775.40  | -7.40  |
| P0A1R4 HIS5_SALTY Imidazole glycerol phohate synthase subunit hisH                      | 9  | Oxidation+M(11)                                | MTDFGLPLPHMGWNR                           | 105 | 15 | 3 | 17.9  | b6y3y14      | 1787.84 | 79.273  | 7286  | 3 | 596.62  | 4.85   |
| P0A1V6 KPRS_SALTY Ribose-phohate pyrophohokinase                                        | 1  |                                                | ITAVIPYFGYAR                              | 84  | 12 | 3 | 29.21 | y3y7y8       | 1370.74 | 80.759  | 23638 | 2 | 685.87  | -5.88  |

|                                                                  |    |                                                      |                                |     |    |    |       |                               |         |         |       |   |         |       |
|------------------------------------------------------------------|----|------------------------------------------------------|--------------------------------|-----|----|----|-------|-------------------------------|---------|---------|-------|---|---------|-------|
| [P0A1V6]KPRS_SALTY Ribose-phohate pyrophohokinase                | 2  |                                                      | LFAGNATPELAQR                  | 5   | 13 | 5  | 31.94 | b7y6y10y11y13                 | 1387.73 | 53.889  | 23230 | 2 | 694.37  | -0.97 |
| [P0A1V6]KPRS_SALTY Ribose-phohate pyrophohokinase                | 3  | Carbamidomethyl+C(10)                                | NSVIDEVVVCDTIPLTDEIK           | 262 | 20 | 3  | 14.19 | b11y4y11                      | 2259.16 | 88.375  | 11641 | 2 | 1130.08 | 7.67  |
| [P0A1V6]KPRS_SALTY Ribose-phohate pyrophohokinase                | 4  |                                                      | ANVSQVMHIIGDVAGR               | 198 | 16 | 3  | 16.93 | b6b8y3                        | 1666.86 | 92.499  | 3932  | 3 | 556.29  | -4.91 |
| [P0A1V6]KPRS_SALTY Ribose-phohate pyrophohokinase                | 5  |                                                      | AAEALK                         | 231 | 6  | 1  | 13.52 | y5                            | 602.36  | 40.927  | 14539 | 1 | 602.36  | 9.93  |
| [P0A1V6]KPRS_SALTY Ribose-phohate pyrophohokinase                | 6  |                                                      | FSDGEVSVQINENVR                | 34  | 15 | 6  | 36.63 | b8b9b11*b11y12y14             | 1692.84 | 103.407 | 1702  | 3 | 564.95  | 11.11 |
| [P0A1V6]KPRS_SALTY Ribose-phohate pyrophohokinase                | 7  |                                                      | ITAVIPYFGYARQDR                | 84  | 15 | 3  | 17.9  | b4y3y8                        | 1769.95 | 67.604  | 9692  | 3 | 590.65  | 7.52  |
| [P26973]PARC_SALTY DNA topoisomerase 4 subunit A                 | 1  |                                                      | LPMVDDLRL                      | 278 | 8  | 3  | 32.78 | b5y6y7                        | 958.50  | 56.869  | 35010 | 2 | 479.76  | 0.70  |
| [P26973]PARC_SALTY DNA topoisomerase 4 subunit A                 | 2  |                                                      | SPLREREEAK                     | 477 | 10 | 5  | 51.48 | b3b5b6b7y1                    | 1214.67 | 12.447  | 4075  | 3 | 405.56  | 13.87 |
| [P26973]PARC_SALTY DNA topoisomerase 4 subunit A                 | 3  |                                                      | YAEALLSELGQGTADWVPNFDGT MQEPK  | 127 | 28 | 6  | 14.69 | b2b5b22y6y11*y11              | 3109.50 | 132.908 | 1588  | 3 | 1037.17 | 4.48  |
| [P26973]PARC_SALTY DNA topoisomerase 4 subunit A                 | 4  |                                                      | LALHEFTENAYLNYSMYVIMDR         | 7   | 22 | 3  | 13.27 | b8y4y6                        | 2693.32 | 94.527  | 22667 | 3 | 898.44  | 15.86 |
| [P26973]PARC_SALTY DNA topoisomerase 4 subunit A                 | 5  |                                                      | GQGEPLTGK                      | 564 | 9  | 5  | 30.18 | b7*b7y5y7*y7                  | 886.48  | 79.016  | 18443 | 1 | 886.48  | 20.31 |
| [P26973]PARC_SALTY DNA topoisomerase 4 subunit A                 | 6  |                                                      | LEEMK                          | 427 | 5  | 1  | 13.11 | b3                            | 649.33  | 41.412  | 14859 | 1 | 649.33  | 8.18  |
| [P26973]PARC_SALTY DNA topoisomerase 4 subunit A                 | 7  |                                                      | EDGAVVISALPHQVSGAK             | 247 | 18 | 4  | 32.25 | b6b9b13b14                    | 1777.98 | 107.413 | 14713 | 3 | 593.33  | 19.98 |
| [P26973]PARC_SALTY DNA topoisomerase 4 subunit A                 | 8  |                                                      | SNQPVVFIIDTTGR                 | 538 | 13 | 5  | 34.07 | b5*b5b11y3y4                  | 1433.74 | 94.903  | 2590  | 2 | 717.37  | 1.79  |
| [P26973]PARC_SALTY DNA topoisomerase 4 subunit A                 | 9  | Carbamidomethyl+C(13)                                | LLMASDAGYGFVCTFNDLVAR          | 593 | 21 | 7  | 45.2  | b6b7b9b12b14y7y10             | 2320.15 | 91.120  | 2035  | 2 | 1160.58 | 17.15 |
| [P26973]PARC_SALTY DNA topoisomerase 4 subunit A                 | 10 |                                                      | EEAKAMSEHDMLPSEPVTVLSQ MGWVR   | 483 | 28 | 4  | 17.11 | b14y7y12y26                   | 3170.54 | 136.650 | 18418 | 2 | 1585.77 | 1.93  |
| [P26973]PARC_SALTY DNA topoisomerase 4 subunit A                 | 11 |                                                      | GEQDELEKER                     | 434 | 10 | 6  | 54.5  | y4*y4y6y8y9*y9                | 1232.58 | 136.337 | 2037  | 1 | 1232.58 | 5.35  |
| [P26973]PARC_SALTY DNA topoisomerase 4 subunit A                 | 12 | Phosphoryl STY(8)                                    | MLMFVPVDSLPLSK                 | 651 | 14 | 3  | 19.04 | b4b6y7                        | 1685.79 | 93.566  | 9188  | 2 | 843.40  | -3.69 |
| [P26973]PARC_SALTY DNA topoisomerase 4 subunit A                 | 13 | Oxidation+M()                                        | LALHEFTENAYLNYSMYVIMDR         | 7   | 22 | 3  | 13.27 | b9y8y18                       | 2709.29 | 68.009  | 32855 | 3 | 903.77  | 9.01  |
| [P26973]PARC_SALTY DNA topoisomerase 4 subunit A                 | 14 |                                                      | SPLREREEAK                     | 477 | 10 | 0  | 2.07  |                               | 1196.65 | 12.446  | 1770  | 3 | 399.55  | 11.83 |
| [P26978]PUR9_SALTY Bifunctional purine biosynthesis protein purH | 1  | Carbamidomethyl+C(16)<br>;Carbamidomethyl+C(25)<br>) | ALSYNNIADTDAALECVKEFNEPA CVIVK | 258 | 29 | 10 | 26.79 | b7*b7b9*b9b11b13y11*y11y22y29 | 3254.57 | 82.905  | 17182 | 3 | 1085.53 | 0.38  |
| [P26978]PUR9_SALTY Bifunctional purine biosynthesis protein purH | 2  |                                                      | VNGGLLVQDR                     | 381 | 10 | 5  | 22.26 | b1y3y4*y4y10                  | 1070.59 | 68.461  | 5957  | 1 | 1070.59 | -1.82 |
| [P26978]PUR9_SALTY Bifunctional purine biosynthesis protein purH | 3  | Carbamidomethyl+C(3)                                 | EGCSLEDAVENIDIGGPTMVR          | 114 | 21 | 4  | 20.34 | y7y9*y9y15                    | 2262.06 | 81.409  | 5585  | 2 | 1131.53 | 8.53  |
| [P26978]PUR9_SALTY Bifunctional purine biosynthesis protein purH | 4  |                                                      | VNGGLLVQDRDLGMVSEAE LR         | 381 | 21 | 4  | 13.7  | b1b4y8y14                     | 2271.19 | 86.752  | 3829  | 2 | 1136.10 | 7.20  |
| [P26978]PUR9_SALTY Bifunctional purine biosynthesis protein purH | 5  | Carbamidomethyl+C(13)                                | DGIDAAAAGVSCVIQPGGSIR          | 482 | 22 | 4  | 23.15 | b2b12b15b16                   | 2113.05 | 69.525  | 3201  | 3 | 705.02  | -7.97 |
| [P26978]PUR9_SALTY Bifunctional purine biosynthesis protein purH | 6  |                                                      | GLPVTESDYTGFPMMMDGR            | 47  | 20 | 5  | 23.61 | b3b9*b9b10y2                  | 2201.01 | 115.647 | 3163  | 4 | 551.01  | 10.20 |

|                                                                  |    |                                                |                                                |      |    |    |       |                                |         |         |       |   |         |        |
|------------------------------------------------------------------|----|------------------------------------------------|------------------------------------------------|------|----|----|-------|--------------------------------|---------|---------|-------|---|---------|--------|
| [P26978]PUR9_SALTY Bifunctional purine biosynthesis protein purH | 7  |                                                | EMDANEGSLTLDTR                                 | 158  | 14 | 4  | 26.82 | y3°y3y10y11                    | 1551.69 | 73.500  | 2618  | 3 | 517.90  | -1.34  |
| [P26978]PUR9_SALTY Bifunctional purine biosynthesis protein purH | 8  | Carbamidomethyl+C(13)                          | QPTEQELRDALFCWK                                | 407  | 15 | 3  | 17.9  | b5y5y10                        | 1920.91 | 65.490  | 2342  | 3 | 640.97  | -10.36 |
| [P26978]PUR9_SALTY Bifunctional purine biosynthesis protein purH | 9  |                                                | GSAMASDAFFPFR                                  | 469  | 13 | 3  | 27.86 | y4y6y7                         | 1403.67 | 50.193  | 31506 | 2 | 702.34  | 22.18  |
| [P26978]PUR9_SALTY Bifunctional purine biosynthesis protein purH | 10 |                                                | AFEHTAAYDSMIANYFGSMVPAY<br>HGESK               | 178  | 28 | 5  | 17.62 | y3°y3y6y11°y11                 | 3094.43 | 61.351  | 5736  | 4 | 774.36  | 18.78  |
| [P26978]PUR9_SALTY Bifunctional purine biosynthesis protein purH | 11 | Carbamidomethyl+C(16)                          | ALSYNNIADTDAALECVK                             | 258  | 18 | 4  | 24.29 | b9b10b12°b12                   | 1967.90 | 84.284  | 5262  | 4 | 492.73  | -19.54 |
| [P26978]PUR9_SALTY Bifunctional purine biosynthesis protein purH | 12 | Carbamidomethyl+C(8)                           | QNVRLVTCGQWAQR                                 | 359  | 14 | 10 | 64.47 | b9b11°b11b12°b12*b12b13y4y9y10 | 1715.87 | 103.467 | 17705 | 2 | 858.44  | -5.34  |
| [P26978]PUR9_SALTY Bifunctional purine biosynthesis protein purH | 13 | Carbamidomethyl+C(7);<br>Carbamidomethyl+C(16) | EFNEPACVIVKHANPCGVAVSTTI<br>LDAYDR             | 276  | 30 | 3  | 22.65 | y10y12y13                      | 3346.65 | 86.426  | 12309 | 5 | 670.14  | 9.56   |
| [P26978]PUR9_SALTY Bifunctional purine biosynthesis protein purH | 14 |                                                | AADEGLEVKGSAMASDAFFPFR                         | 460  | 22 | 3  | 13.27 | b11y9y12                       | 2316.10 | 106.885 | 8228  | 3 | 772.71  | 2.64   |
| [P26978]PUR9_SALTY Bifunctional purine biosynthesis protein purH | 15 |                                                | DDEVIAAADEHGIAMIFTDMRHFR                       | 504  | 24 | 7  | 29.86 | b6b8°b8b22y3y5y7               | 2760.30 | 136.336 | 3622  | 2 | 1380.66 | 5.93   |
| [P26978]PUR9_SALTY Bifunctional purine biosynthesis protein purH | 16 | Carbamidomethyl+C(5)                           | HANPCGVAVSTTILDAYDRAYK                         | 287  | 22 | 5  | 40.68 | b3b4b12b13y3                   | 2422.16 | 72.083  | 2033  | 3 | 808.06  | -7.66  |
| [P26978]PUR9_SALTY Bifunctional purine biosynthesis protein purH | 17 | Oxidation+M(20)                                | SNAIVYAKENMTIGIGAGQMSR                         | 428  | 22 | 3  | 13.27 | b12y5y7                        | 2327.14 | 88.227  | 12412 | 3 | 776.38  | -4.62  |
| [P26978]PUR9_SALTY Bifunctional purine biosynthesis protein purH | 18 | Carbamidomethyl+C(13);<br>Oxidation+M()        | DGIDAAAAGVSCVIQPGGSIRDD<br>EVIAAADEHGIAMIFTDMR | 482  | 43 | 8  | 25.91 | b3b9°b9b12°b12b13b15y8         | 4430.16 | 136.316 | 5961  | 5 | 886.84  | 12.45  |
| [P26978]PUR9_SALTY Bifunctional purine biosynthesis protein purH | 19 | Oxidation+M(11)                                | AFEHTAAYDSMIANYFGSMVPAY<br>HGESK               | 178  | 28 | 3  | 11.6  | b3b16y8                        | 3110.38 | 118.402 | 3774  | 2 | 1555.70 | 6.04   |
| [P26978]PUR9_SALTY Bifunctional purine biosynthesis protein purH | 20 | Carbamidomethyl+C(16)                          | ALSYNNIADTDAALECVKEFNE                         | 258  | 22 | 2  | 9.26  | y13°y13                        | 2487.15 | 82.819  | 4862  | 3 | 829.72  | 4.71   |
| [P14846]CARB_SALTY Carbamoyl-phosphate synthase large chain      | 1  |                                                | AQLGSNSTMK                                     | 930  | 10 | 4  | 26.62 | b2b3b5y7                       | 1036.52 | 28.088  | 17379 | 2 | 518.77  | 13.31  |
| [P14846]CARB_SALTY Carbamoyl-phosphate synthase large chain      | 2  |                                                | VHYDTTLNGGFATTMALNADAT<br>EK                   | 1037 | 24 | 9  | 32.41 | b5b10b11b13°b13y1y9y11y24      | 2541.18 | 87.791  | 15227 | 3 | 847.73  | -3.27  |
| [P14846]CARB_SALTY Carbamoyl-phosphate synthase large chain      | 3  |                                                | NASMAVLREIGVETGGSNVQFAV<br>NPK                 | 265  | 26 | 5  | 12.02 | b2b10b14y14*y14                | 2688.36 | 98.353  | 5161  | 2 | 1344.68 | -5.72  |
| [P14846]CARB_SALTY Carbamoyl-phosphate synthase large chain      | 4  |                                                | GLDLSPTNELLIDESLIGWKEYEM<br>EVVR               | 194  | 28 | 4  | 8.52  | b2b14y11°y11                   | 3248.62 | 106.413 | 4403  | 3 | 1083.55 | -4.96  |
| [P14846]CARB_SALTY Carbamoyl-phosphate synthase large chain      | 5  |                                                | QGVLEEFGVTMIGATADAIDK                          | 104  | 21 | 8  | 29.35 | b12b14°b14*b14y3y4y9°y9        | 2165.07 | 107.498 | 3938  | 2 | 1083.04 | -4.17  |
| [P14846]CARB_SALTY Carbamoyl-phosphate synthase large chain      | 6  |                                                | SLTEQGVQTQEIPPPYSVK                            | 872  | 19 | 3  | 14.74 | b12y5y7                        | 2152.11 | 74.712  | 3716  | 2 | 1076.56 | -2.16  |
| [P14846]CARB_SALTY Carbamoyl-phosphate synthase large chain      | 7  |                                                | IGLDTAR                                        | 138  | 7  | 4  | 56.26 | b5b6y4y6                       | 745.43  | 28.139  | 35634 | 2 | 373.22  | 15.48  |
| [P14846]CARB_SALTY Carbamoyl-phosphate synthase large chain      | 8  |                                                | LAGVR                                          | 504  | 5  | 1  | 13.11 | b3                             | 515.33  | 74.203  | 13440 | 1 | 515.33  | -0.95  |

|                                                                                   |    |                                                      |                                  |     |    |    |       |                                   |         |         |       |   |         |        |
|-----------------------------------------------------------------------------------|----|------------------------------------------------------|----------------------------------|-----|----|----|-------|-----------------------------------|---------|---------|-------|---|---------|--------|
| [P14846]CARB_SALTY Carbamoyl-phohate synthase large chain                         | 9  |                                                      | GLMNVQFAVK                       | 823 | 10 | 3  | 26.62 | b3b8y3                            | 1106.58 | 53.287  | 7857  | 2 | 553.80  | -17.54 |
| [P14846]CARB_SALTY Carbamoyl-phohate synthase large chain                         | 10 |                                                      | VAEVGITGLNADFLR                  | 475 | 15 | 7  | 36.63 | b5°b5b7y3y4y8°y8                  | 1574.86 | 81.842  | 7187  | 2 | 787.93  | 0.93   |
| [P14846]CARB_SALTY Carbamoyl-phohate synthase large chain                         | 11 |                                                      | ALEAAGVPVIGTSPDAIDR              | 652 | 19 | 4  | 22.52 | b17y5°y5y6                        | 1851.94 | 80.655  | 7079  | 2 | 926.47  | -21.16 |
| [P14846]CARB_SALTY Carbamoyl-phohate synthase large chain                         | 12 | Carbamidomethyl+C(10)<br>;Carbamidomethyl+C(11)<br>) | IGQGIEFDYCCVHASLALR              | 571 | 19 | 6  | 45.77 | b3b7b8°b8b12b13                   | 2209.08 | 107.424 | 3336  | 3 | 737.03  | 11.94  |
| [P14846]CARB_SALTY Carbamoyl-phohate synthase large chain                         | 13 |                                                      | LAVGYTLDELMNDITGGR               | 325 | 18 | 4  | 15.37 | b3y6°y6y14                        | 1937.93 | 111.541 | 2299  | 2 | 969.47  | -19.97 |
| [P14846]CARB_SALTY Carbamoyl-phohate synthase large chain                         | 14 |                                                      | YFQTAVSVSNDAPVLLDR               | 736 | 18 | 11 | 54.92 | b7b9°b9°b9b10b11b13y10°y10y15°y15 | 1995.00 | 104.254 | 2198  | 2 | 998.00  | -10.77 |
| [P14846]CARB_SALTY Carbamoyl-phohate synthase large chain                         | 15 |                                                      | FPGVDPLLGPEMRSTGEVMGVGR          | 899 | 23 | 5  | 17.22 | b3b6°b6y3y11                      | 2401.22 | 64.508  | 39943 | 3 | 801.08  | 7.63   |
| [P14846]CARB_SALTY Carbamoyl-phohate synthase large chain                         | 16 |                                                      | DNEVYLIEVNPRAAR                  | 833 | 15 | 4  | 17.9  | b7b9°b9y3                         | 1758.90 | 82.531  | 26886 | 2 | 879.95  | -9.79  |
| [P14846]CARB_SALTY Carbamoyl-phohate synthase large chain                         | 17 |                                                      | EIGVETGGSNVQFAVNPKNGR            | 273 | 21 | 5  | 30.79 | b3b4b10b13y10                     | 2173.10 | 92.652  | 7182  | 2 | 1087.06 | 1.69   |
| [P14846]CARB_SALTY Carbamoyl-phohate synthase large chain                         | 18 |                                                      | QGVLEEFGVTMIGATADAIDKAE<br>DR    | 104 | 25 | 5  | 25.6  | b12°b12b13y5y16                   | 2636.31 | 85.070  | 5473  | 3 | 879.44  | 8.98   |
| [P14846]CARB_SALTY Carbamoyl-phohate synthase large chain                         | 19 |                                                      | DAGADRIWYIADAFR                  | 429 | 15 | 5  | 41.13 | b4b8b10b13°b13                    | 1739.84 | 39.010  | 4423  | 3 | 580.62  | -5.89  |
| [P14846]CARB_SALTY Carbamoyl-phohate synthase large chain                         | 20 |                                                      | FAGANDRLTTQMK                    | 366 | 13 | 4  | 25.15 | b10b11y5*y5                       | 1452.73 | 76.181  | 3335  | 2 | 726.87  | 0.76   |
| [P14846]CARB_SALTY Carbamoyl-phohate synthase large chain                         | 21 |                                                      | ELKDAGADR                        | 426 | 9  | 3  | 30.18 | b4y7y8                            | 974.48  | 83.512  | 2871  | 1 | 974.48  | -8.89  |
| [P14846]CARB_SALTY Carbamoyl-phohate synthase large chain                         | 22 |                                                      | STGEVMGVGRTFAEAFK                | 912 | 18 | 5  | 36.23 | b8b9y6°y6y7                       | 1857.91 | 136.191 | 2111  | 2 | 929.46  | -1.58  |
| [P14846]CARB_SALTY Carbamoyl-phohate synthase large chain                         | 23 |                                                      | SVGEVMAIGRTQQESLQK               | 379 | 18 | 3  | 15.37 | b6b9y7                            | 1960.99 | 67.645  | 1899  | 2 | 981.00  | -10.08 |
| [P14846]CARB_SALTY Carbamoyl-phohate synthase large chain                         | 24 | Phosphoryl STY(22)                                   | GLDLSPTNELLIDESLIGWKEYEM<br>EVVR | 194 | 28 | 3  | 21.82 | b13y5y6                           | 3328.57 | 82.081  | 2234  | 3 | 1110.20 | -6.67  |
| [P14846]CARB_SALTY Carbamoyl-phohate synthase large chain                         | 25 | Oxidation+M(11)                                      | QGVLEEFGVTMIGATADAIDK            | 104 | 21 | 3  | 13.7  | b12b14y6                          | 2181.10 | 77.333  | 2147  | 2 | 1091.05 | 12.09  |
| [P14846]CARB_SALTY Carbamoyl-phohate synthase large chain                         | 26 |                                                      | QGVLEEF                          | 104 | 7  | 2  | 21.09 | y4y5                              | 821.41  | 107.448 | 4748  | 1 | 821.41  | 7.06   |
| [Q8ZNF3]ARNB_SALTY UDP-4-amino-4-deoxy-L-arabinose--oxoglutarate aminotransferase | 1  |                                                      | TVLDSGWITGPK                     | 21  | 13 | 4  | 25.15 | b9b10y9y13                        | 1374.73 | 81.280  | 36281 | 2 | 687.87  | 2.04   |
| [Q8ZNF3]ARNB_SALTY UDP-4-amino-4-deoxy-L-arabinose--oxoglutarate aminotransferase | 2  |                                                      | APQAEVLAPGYK                     | 223 | 12 | 6  | 35.23 | b1b4b5b6°b6°b6                    | 1243.68 | 57.163  | 12876 | 2 | 622.35  | 13.15  |
| [Q8ZNF3]ARNB_SALTY UDP-4-amino-4-deoxy-L-arabinose--oxoglutarate aminotransferase | 3  |                                                      | SDFLPFSRPAMGAEEAIAVK             | 1   | 20 | 5  | 22.32 | b4b8b12y11y20                     | 2136.10 | 122.212 | 7160  | 2 | 1068.56 | 11.32  |
| [Q8ZNF3]ARNB_SALTY UDP-4-amino-4-deoxy-L-arabinose--oxoglutarate aminotransferase | 4  |                                                      | FPTLTLPDTEWNSER                  | 336 | 15 | 7  | 25.44 | b2b5b13°b13y9y11y15               | 1805.88 | 82.663  | 3734  | 2 | 903.44  | 6.42   |
| [Q8ZNF3]ARNB_SALTY UDP-4-amino-4-deoxy-L-arabinose--oxoglutarate aminotransferase | 5  |                                                      | AHPVHYAGAPADLDAIYALGER           | 123 | 23 | 3  | 12.89 | b4y4y16                           | 2396.26 | 85.411  | 3166  | 3 | 799.42  | -2.14  |
| [Q8ZNF3]ARNB_SALTY UDP-4-amino-4-deoxy-L-arabinose--oxoglutarate aminotransferase | 6  |                                                      | YGIPVIEDAAHATGTSYK               | 146 | 18 | 6  | 21.42 | b4b8°b8y6°y6y13                   | 1892.91 | 64.641  | 30347 | 3 | 631.64  | -15.93 |
| [Q8ZNF3]ARNB_SALTY UDP-4-amino-4-deoxy-L-arabinose--oxoglutarate aminotransferase | 7  | Carbamidomethyl+C(2)                                 | ICSLPLFPDMTESDFDR                | 351 | 17 | 3  | 24.75 | b4b5b7                            | 2042.96 | 135.555 | 25753 | 3 | 681.66  | 19.78  |

|                                                                                   |    |                      |                                          |     |    |    |       |                                      |         |         |        |   |         |        |
|-----------------------------------------------------------------------------------|----|----------------------|------------------------------------------|-----|----|----|-------|--------------------------------------|---------|---------|--------|---|---------|--------|
| [Q8ZNF3]ARNB_SALTY UDP-4-amino-4-deoxy-L-arabinose--oxoglutarate aminotransferase | 8  |                      | FHGLGVDAWDR                              | 207 | 11 | 4  | 36.34 | b5b6b9y8                             | 1272.60 | 33.202  | 1874   | 2 | 636.80  | -11.22 |
| [Q8ZNF3]ARNB_SALTY UDP-4-amino-4-deoxy-L-arabinose--oxoglutarate aminotransferase | 9  |                      | FHGLGVDAWDRQSGGR                         | 207 | 16 | 3  | 16.93 | b11y3y13                             | 1757.87 | 79.614  | 6729   | 2 | 879.44  | 11.53  |
| [Q8ZNF3]ARNB_SALTY UDP-4-amino-4-deoxy-L-arabinose--oxoglutarate aminotransferase | 10 |                      | AIPVHYAGAPADLDAIYALG                     | 123 | 21 | 3  | 19.3  | y7y10y14                             | 2111.11 | 85.346  | 7375   | 2 | 1056.06 | -5.20  |
| [P0A1W6]LIVK_SALTY Leucine-ecific-binding protein                                 | 1  |                      | QGNANIVFFDGITAGEK                        | 186 | 17 | 6  | 32.31 | b9b11°b11y3y11y14                    | 1780.91 | 114.087 | 10670  | 2 | 890.96  | 10.76  |
| [P0A1W6]LIVK_SALTY Leucine-ecific-binding protein                                 | 2  |                      | TQFMGPEGVGNASLSNIAGGAAE<br>GMLVTMPK      | 242 | 31 | 3  | 11.18 | b5b15y3                              | 3035.47 | 92.538  | 7274   | 3 | 1012.50 | 3.54   |
| [P0A1W6]LIVK_SALTY Leucine-ecific-binding protein                                 | 3  |                      | TAGLDSQSGPTAAK                           | 139 | 14 | 4  | 31.17 | b10y8y10y12                          | 1303.65 | 28.451  | 5722   | 2 | 652.33  | -2.62  |
| [P0A1W6]LIVK_SALTY Leucine-ecific-binding protein                                 | 4  |                      | VAIVGAMSGPVAQWGDMEFNGA<br>R              | 27  | 23 | 9  | 54.44 | b8b14°b14b18y3y4y7y8y1<br>0          | 2363.13 | 136.301 | 2237   | 2 | 1182.07 | 2.38   |
| [P0A1W6]LIVK_SALTY Leucine-ecific-binding protein                                 | 5  |                      | SVQDGLKQGNANIVFFDGITAGE<br>K             | 179 | 24 | 4  | 16.61 | b4b12y3y14                           | 2508.31 | 73.999  | 3794   | 2 | 1254.66 | 14.41  |
| [P0A1W6]LIVK_SALTY Leucine-ecific-binding protein                                 | 6  | Oxidation+M(21)      | DPSGPYVWITYAAVQSLATAMTR                  | 293 | 23 | 4  | 21.93 | b13y5°y5y6                           | 2514.20 | 108.990 | 1563   | 3 | 838.74  | -12.24 |
| [Q7CPE1]ATPA_SALTY ATP synthase subunit alpha                                     | 1  |                      | AVDSMIPIGR                               | 151 | 10 | 8  | 38.93 | b7b9°b9b10y1y3y6y10                  | 1058.55 | 52.223  | 129786 | 2 | 529.78  | -13.26 |
| [Q7CPE1]ATPA_SALTY ATP synthase subunit alpha                                     | 2  |                      | IGSFEAALLAYVDRDHAPLMQEIN<br>QSGGYNDEIEGK | 463 | 36 | 4  | 22.49 | b5y2y6y7                             | 3950.88 | 96.399  | 39503  | 4 | 988.47  | -2.60  |
| [Q7CPE1]ATPA_SALTY ATP synthase subunit alpha                                     | 3  |                      | DSVGAVVMGPYADLAEGMK                      | 68  | 19 | 4  | 14.74 | b6b8y1y12                            | 1909.92 | 83.608  | 34342  | 2 | 955.46  | 8.69   |
| [Q7CPE1]ATPA_SALTY ATP synthase subunit alpha                                     | 4  |                      | QYAPMSVAQQSLVLFAAER                      | 434 | 19 | 5  | 14.74 | b3y2y5y16°y16                        | 2109.09 | 93.191  | 28057  | 2 | 1055.05 | 2.66   |
| [Q7CPE1]ATPA_SALTY ATP synthase subunit alpha                                     | 5  |                      | ELAASFQFASDLDDATR                        | 401 | 17 | 9  | 42.19 | b3°b3b6y1y3y4°y4y9y13                | 1856.88 | 88.776  | 20409  | 2 | 928.95  | 9.40   |
| [Q7CPE1]ATPA_SALTY ATP synthase subunit alpha                                     | 6  |                      | QSVDQPQVTGYK                             | 139 | 12 | 7  | 33.86 | b9°b9b12y7y9y10°y10                  | 1349.67 | 33.827  | 19363  | 2 | 675.34  | -2.35  |
| [Q7CPE1]ATPA_SALTY ATP synthase subunit alpha                                     | 7  |                      | YAIALNLERDSVGAVVMGPYADL<br>AEGMK         | 59  | 28 | 4  | 17.62 | y2y7y11y13                           | 2953.50 | 115.216 | 2725   | 3 | 985.17  | 7.27   |
| [Q7CPE1]ATPA_SALTY ATP synthase subunit alpha                                     | 8  |                      | GEDALIYDDLK                              | 252 | 13 | 5  | 25.15 | b10b11b13°b13y5                      | 1451.71 | 90.009  | 2249   | 2 | 726.36  | -9.25  |
| [Q7CPE1]ATPA_SALTY ATP synthase subunit alpha                                     | 9  |                      | IAQFNVVSEAHNEGTVSVSDGVI<br>R             | 15  | 25 | 3  | 18.5  | b9b13b15                             | 2641.35 | 102.788 | 1705   | 3 | 881.12  | -3.97  |
| [Q7CPE1]ATPA_SALTY ATP synthase subunit alpha                                     | 10 |                      | GYLADVELAK                               | 453 | 10 | 4  | 42.73 | b3y6y7y8                             | 1078.57 | 60.765  | 39612  | 2 | 539.79  | -3.28  |
| [Q7CPE1]ATPA_SALTY ATP synthase subunit alpha                                     | 11 |                      | VVNTLGAPIDGKGVPVDNDGFSAV<br>EAIAPGVIDR   | 106 | 33 | 12 | 49.17 | b4°b4b5°b5b27y6°y6y7y10<br>y13y15y28 | 3263.70 | 84.197  | 50530  | 3 | 1088.57 | 2.77   |
| [Q7CPE1]ATPA_SALTY ATP synthase subunit alpha                                     | 12 |                      | AARVNADYVEAFTK                           | 300 | 14 | 4  | 27.21 | b8b13y5y11                           | 1554.77 | 78.627  | 5176   | 2 | 777.89  | -13.27 |
| [Q7CPE1]ATPA_SALTY ATP synthase subunit alpha                                     | 13 |                      | VNADYVEAFTKGEVK                          | 303 | 15 | 3  | 25.98 | b3b7b14                              | 1669.84 | 78.702  | 2672   | 2 | 835.42  | -1.68  |
| [Q7CPE1]ATPA_SALTY ATP synthase subunit alpha                                     | 14 |                      | DHAPLMQEINQSGGYNDEIEGKL<br>K             | 477 | 24 | 3  | 12.56 | b22y10y16                            | 2686.26 | 92.605  | 1530   | 2 | 1343.64 | -5.63  |
| [P40732]ARGD_SALTY Acetylornithine/succinyldiaminopimelate aminotransferase       | 1  |                      | SQGETLWHTSNVFTNEPALR                     | 68  | 20 | 8  | 41.79 | b13°b13y6y7y12y13°y13y<br>20         | 2287.11 | 71.998  | 34783  | 3 | 763.04  | -0.85  |
| [P40732]ARGD_SALTY Acetylornithine/succinyldiaminopimelate aminotransferase       | 2  | Carbamidomethyl+C(8) | AVMDDHTCAVVVEPIQEGGVQ<br>AATPEFLK        | 180 | 30 | 6  | 24.58 | b12b13y1y12y14y30                    | 3168.55 | 75.340  | 24563  | 3 | 1056.85 | 4.31   |
| [P40732]ARGD_SALTY Acetylornithine/succinyldiaminopimelate aminotransferase       | 3  |                      | FAPSLVVEADIHEGMQR                        | 377 | 18 | 9  | 71.52 | b13y5°y5y6°y6y7y10y11y1<br>2         | 2027.97 | 68.468  | 70990  | 3 | 676.66  | -5.24  |



|                                                                                   |    |                                                     |                                              |     |    |   |       |                              |         |         |       |   |         |        |
|-----------------------------------------------------------------------------------|----|-----------------------------------------------------|----------------------------------------------|-----|----|---|-------|------------------------------|---------|---------|-------|---|---------|--------|
| [P40732]ARGD_SALTY<br>Acetylornithine/succinyldiaminopimelate<br>aminotransferase | 4  |                                                     | TGDLFAYMHYGVTPDILTSAK                        | 234 | 21 | 5 | 24.42 | b3*b3b4b7y14                 | 2300.12 | 88.582  | 58878 | 3 | 767.38  | -0.96  |
| [P40732]ARGD_SALTY<br>Acetylornithine/succinyldiaminopimelate<br>aminotransferase | 5  |                                                     | VLFMNSGTEANETAFK                             | 101 | 16 | 6 | 34.31 | b7b12y4y9y12*y12             | 1758.85 | 67.826  | 41164 | 2 | 879.93  | 6.18   |
| [P40732]ARGD_SALTY<br>Acetylornithine/succinyldiaminopimelate<br>aminotransferase | 6  | Carbamidomethyl+C(3);<br>Carbamidomethyl+C(17)      | DLCDEHQALLVFDEVQCGMGR                        | 213 | 21 | 3 | 13.7  | b10b13y4                     | 2492.12 | 85.355  | 13000 | 3 | 831.38  | 7.84   |
| [P40732]ARGD_SALTY<br>Acetylornithine/succinyldiaminopimelate<br>aminotransferase | 7  | Carbamidomethyl+C(4)                                | HYACVR                                       | 120 | 6  | 1 | 13.52 | y3                           | 805.38  | 55.057  | 2011  | 2 | 403.19  | -1.36  |
| [P40732]ARGD_SALTY<br>Acetylornithine/succinyldiaminopimelate<br>aminotransferase | 8  |                                                     | QQFVQHLQAIDEQFDIFSDIR                        | 315 | 21 | 5 | 13.7  | b13*b13y10y12*y12            | 2577.24 | 79.584  | 1824  | 3 | 859.75  | -14.21 |
| [P40732]ARGD_SALTY<br>Acetylornithine/succinyldiaminopimelate<br>aminotransferase | 9  |                                                     | ATFDEVILPVYAPADFIPVKGK                       | 10  | 22 | 9 | 54.22 | b4*b4b7b14b16b20y5y14y<br>21 | 2390.30 | 94.770  | 30217 | 3 | 797.44  | -2.25  |
| [P40732]ARGD_SALTY<br>Acetylornithine/succinyldiaminopimelate<br>aminotransferase | 10 |                                                     | ARDFLYAGAEAGVMVLNAGADV<br>MR                 | 353 | 24 | 5 | 28.37 | b7y7y8y10y15                 | 2497.26 | 69.498  | 7144  | 3 | 833.09  | 9.78   |
| [P40732]ARGD_SALTY<br>Acetylornithine/succinyldiaminopimelate<br>aminotransferase | 11 | Carbamidomethyl+C(6);<br>Carbamidomethyl+C(20)      | GLRDLCEHQALLVFDEVQCGM<br>GR                  | 210 | 24 | 4 | 12.56 | b6*b6y7y12                   | 2818.33 | 138.149 | 3606  | 3 | 940.11  | 7.36   |
| [P40732]ARGD_SALTY<br>Acetylornithine/succinyldiaminopimelate<br>aminotransferase | 12 |                                                     | RQQFVQHLQAIDEQFDIFSDIR                       | 314 | 22 | 6 | 25.21 | b4b7y7y11y13*y13             | 2733.40 | 75.198  | 2052  | 3 | 911.81  | 11.16  |
| [Q8ZNK6]END4_SALTY Probable<br>endonuclease 4                                     | 1  |                                                     | YIGAHVSAAGGLANAPAR                           | 2   | 18 | 5 | 26.26 | b6b7b12y8y18                 | 1695.87 | 52.392  | 6223  | 2 | 848.44  | -10.44 |
| [Q8ZNK6]END4_SALTY Probable<br>endonuclease 4                                     | 2  | Carbamidomethyl+C(1);<br>Carbamidomethyl+C(25)      | CEQLGLTLLNFHPGSHLMQIAQED<br>CLAR             | 97  | 28 | 9 | 38.74 | b6*b6b12y4y8y9*y9y10*y<br>10 | 3251.54 | 124.765 | 5812  | 4 | 813.64  | -12.09 |
| [Q8ZNK6]END4_SALTY Probable<br>endonuclease 4                                     | 3  |                                                     | TFAEFGK                                      | 198 | 7  | 3 | 40.15 | b3b5y4                       | 799.40  | 111.392 | 2556  | 1 | 799.40  | 4.50   |
| [Q8ZNK6]END4_SALTY Probable<br>endonuclease 4                                     | 4  |                                                     | SAFGSRVDR                                    | 221 | 9  | 3 | 30.18 | b4y6y7                       | 994.52  | 88.806  | 5700  | 2 | 497.76  | 14.24  |
| [Q8ZNK6]END4_SALTY Probable<br>endonuclease 4                                     | 5  |                                                     | GMHLNDAKSAFGSR                               | 213 | 14 | 4 | 32.65 | b5b9y4y5                     | 1490.72 | 114.797 | 2135  | 2 | 745.87  | 5.00   |
| [P67537]YBED_SALTY UPF0250 protein<br>ybeD                                        | 1  |                                                     | VMGQALPELVDQVVEVVQR                          | 18  | 19 | 7 | 28.99 | b4b6*b6b12y1y3y5             | 2109.14 | 108.926 | 13819 | 3 | 703.72  | -0.81  |
| [P67537]YBED_SALTY UPF0250 protein<br>ybeD                                        | 2  |                                                     | GNYHSVSITINATHIEQVETLYEEL<br>GNIDIVR         | 52  | 32 | 4 | 13.38 | b7b12y12y19                  | 3627.85 | 112.057 | 6951  | 3 | 1209.95 | 5.52   |
| [P67537]YBED_SALTY UPF0250 protein<br>ybeD                                        | 3  |                                                     | LNELLEFPPTPTYK                               | 4   | 14 | 5 | 27.21 | b6b13y3*y3y8                 | 1711.89 | 94.733  | 14470 | 2 | 856.45  | -1.28  |
| [Q8ZRT5]GUAC_SALTY GMP reductase                                                  | 1  | Carbamidomethyl+C(3)                                | SACTYVGASR                                   | 313 | 10 | 3 | 26.62 | b6y5y7                       | 1071.48 | 27.235  | 12499 | 2 | 536.24  | -6.38  |
| [Q8ZRT5]GUAC_SALTY GMP reductase                                                  | 2  | Carbamidomethyl+C(9)                                | VGIGPGSVCTTR                                 | 177 | 12 | 5 | 49.19 | b3y4y7y8y9                   | 1203.62 | 42.575  | 11347 | 2 | 602.31  | 0.00   |
| [Q8ZRT5]GUAC_SALTY GMP reductase                                                  | 3  |                                                     | ELTK                                         | 325 | 4  | 2 | 12.69 | b3*b3                        | 490.28  | 33.318  | 25975 | 1 | 490.28  | -9.03  |
| [Q8ZRT5]GUAC_SALTY GMP reductase                                                  | 4  |                                                     | IEEDLK                                       | 2   | 6  | 1 | 13.52 | b3                           | 746.39  | 28.299  | 10723 | 1 | 746.39  | -3.43  |
| [Q8ZRT5]GUAC_SALTY GMP reductase                                                  | 5  |                                                     | EAWPTK                                       | 146 | 6  | 1 | 13.52 | b5                           | 731.37  | 91.916  | 3950  | 1 | 731.37  | 0.17   |
| [Q8ZRT5]GUAC_SALTY GMP reductase                                                  | 6  | Carbamidomethyl+C(14)<br>;Carbamidomethyl+C(31<br>) | TGVGYPQLSAVIECADA AHGLGG<br>MIVSDGGCTMPGDVAK | 191 | 39 | 6 | 22.44 | b5b10*b10b11y5y7             | 3861.81 | 105.051 | 1644  | 3 | 1287.94 | 5.06   |
| [Q8ZRT5]GUAC_SALTY GMP reductase                                                  | 7  | Carbamidomethyl+C(10)                               | DILGGLRSACTYVGASR                            | 306 | 17 | 4 | 27.06 | b3y10y11y15                  | 1795.93 | 90.008  | 42204 | 3 | 599.31  | 8.77   |

|                                                    |    |                      |                                 |     |    |    |       |                                           |         |         |       |   |         |        |
|----------------------------------------------------|----|----------------------|---------------------------------|-----|----|----|-------|-------------------------------------------|---------|---------|-------|---|---------|--------|
| P40861 PROA_SALTY Gamma-glutamyl phohate reductase | 1  | Carbamidomethyl+C(3) | QVCNLADPVGQVIDGGLDLSGLR         | 81  | 23 | 5  | 12.34 | b12*b12b21y6°y23                          | 2396.25 | 91.889  | 21741 | 3 | 799.42  | 11.11  |
| P40861 PROA_SALTY Gamma-glutamyl phohate reductase | 2  |                      | IADELEAQMESILSANVQDVEQAR        | 30  | 24 | 12 | 47.03 | b2b4b9b12y8°y8y10y11°y11*y11y15y22        | 2659.27 | 94.880  | 14537 | 3 | 887.10  | -5.60  |
| P40861 PROA_SALTY Gamma-glutamyl phohate reductase | 3  |                      | FVNEVDSAAVYVNASTR               | 353 | 17 | 10 | 42.03 | b5b10b13*b13y5°y5*y5y10y13°y13            | 1841.88 | 93.681  | 8019  | 2 | 921.44  | -12.26 |
| P40861 PROA_SALTY Gamma-glutamyl phohate reductase | 4  |                      | WIGFGDGTIR                      | 405 | 10 | 6  | 39.72 | b6b10y6y8y9y10                            | 1121.59 | 115.448 | 3403  | 2 | 561.30  | 13.28  |
| P40861 PROA_SALTY Gamma-glutamyl phohate reductase | 5  |                      | GPMGLEALTTYK                    | 393 | 12 | 6  | 53.96 | b4b5b6°b6b7y9                             | 1280.63 | 97.926  | 12355 | 2 | 640.82  | -20.87 |
| P40861 PROA_SALTY Gamma-glutamyl phohate reductase | 6  | Carbamidomethyl+C(2) | ACGLPEAAVQAIDNPDR               | 164 | 17 | 5  | 22.59 | b9°b9b14y9y12                             | 1796.83 | 59.086  | 4679  | 3 | 599.61  | -18.68 |
| P40861 PROA_SALTY Gamma-glutamyl phohate reductase | 7  |                      | AIADDVR                         | 74  | 7  | 3  | 37.13 | b4b5y4                                    | 759.41  | 40.479  | 2032  | 1 | 759.41  | 11.41  |
| P40861 PROA_SALTY Gamma-glutamyl phohate reductase | 8  |                      | FTDGGQFGLGAEVAVSTQK             | 370 | 19 | 13 | 45.1  | b9°b9*b9b11b12b13°b13*b13y6*y6y10°y10*y10 | 1911.96 | 136.302 | 2004  | 2 | 956.49  | 10.15  |
| P40861 PROA_SALTY Gamma-glutamyl phohate reductase | 9  |                      | ANGLSEAMLDLDR                   | 54  | 11 | 5  | 24.02 | b4b10°b10y6°y6                            | 1176.55 | 136.357 | 1608  | 1 | 1176.55 | -12.45 |
| P40861 PROA_SALTY Gamma-glutamyl phohate reductase | 10 |                      | LHARGPMGLEALTTYK                | 389 | 16 | 3  | 16.93 | b8y7y13                                   | 1757.92 | 103.270 | 8900  | 2 | 879.46  | -10.49 |
| P40861 PROA_SALTY Gamma-glutamyl phohate reductase | 11 |                      | SLVNEMLRMDK                     | 181 | 11 | 3  | 24.02 | b10y3y8                                   | 1335.69 | 38.864  | 6777  | 2 | 668.35  | 13.62  |
| P40861 PROA_SALTY Gamma-glutamyl phohate reductase | 12 | Phosphoryl STY(5)    | LALLSSGEK                       | 15  | 9  | 4  | 30.18 | b5b7y3°y3                                 | 997.49  | 136.211 | 2268  | 1 | 997.49  | -1.41  |
| P0A7S6 RS12_SALTY 30S ribosomal protein S12        | 1  | Carbamidomethyl+C(9) | SNVPALEACPQKR                   | 18  | 13 | 8  | 58.05 | b2y4y6y7y8y9°y9*y9                        | 1469.73 | 37.052  | 46454 | 3 | 490.58  | -14.45 |
| P0A7S6 RS12_SALTY 30S ribosomal protein S12        | 2  | Carbamidomethyl+C(9) | SNVPALEACPQK                    | 18  | 12 | 5  | 29.21 | b2y6y7y9y12                               | 1313.65 | 41.069  | 11744 | 2 | 657.33  | -1.67  |
| P0A7S6 RS12_SALTY 30S ribosomal protein S12        | 3  | Carbamidomethyl+C(5) | GALDCSGVK                       | 99  | 9  | 5  | 44.54 | b3b4y5y7°y7                               | 906.43  | 76.296  | 5181  | 1 | 906.43  | -0.20  |
| P0A7S6 RS12_SALTY 30S ribosomal protein S12        | 4  |                      | DLPGVR                          | 88  | 6  | 1  | 13.52 | y4                                        | 656.37  | 52.522  | 4629  | 1 | 656.37  | -10.04 |
| Q9L9I8 THIE_SALTY Thiamine-phohate pyrophohorylase | 1  |                      | QMPSAPQGLAQLASHIER              | 137 | 18 | 6  | 36.56 | b2b5y6y9y13y16                            | 1933.98 | 75.415  | 27674 | 3 | 645.33  | -8.21  |
| Q9L9I8 THIE_SALTY Thiamine-phohate pyrophohorylase | 2  |                      | MYQPDPFTVPFR                    | 0   | 12 | 4  | 22.01 | b3y3y9°y9                                 | 1497.73 | 78.080  | 24224 | 2 | 749.37  | 9.70   |
| Q9L9I8 THIE_SALTY Thiamine-phohate pyrophohorylase | 3  |                      | EATAELLAIAAGVGDE                | 196 | 15 | 3  | 17.9  | b8y10y12                                  | 1458.73 | 69.522  | 3815  | 2 | 729.87  | -3.93  |
| Q9L9I8 THIE_SALTY Thiamine-phohate pyrophohorylase | 4  |                      | AYGVHLGQEDLETTDLK               | 79  | 17 | 3  | 16.1  | b10b13y6                                  | 1888.92 | 110.329 | 2609  | 3 | 630.31  | -5.17  |
| Q9L9I8 THIE_SALTY Thiamine-phohate pyrophohorylase | 5  |                      | APAVLATGVGSIAVVSQAADWR          | 171 | 25 | 7  | 27.62 | y4°y4y5°y5y7°y7y9                         | 2424.32 | 108.083 | 1762  | 3 | 808.78  | -0.30  |
| Q8ZMB5 PTRA_SALTY Protease 3                       | 1  |                      | TAFYLEVENDALPGAVDR              | 126 | 18 | 5  | 28.83 | b2b9b10y6y14                              | 1979.95 | 90.916  | 3527  | 2 | 990.48  | -8.14  |
| Q8ZMB5 PTRA_SALTY Protease 3                       | 2  |                      | LADFFHQAVVEPQGMAILSQIAGSQNGK    | 904 | 28 | 4  | 24.9  | b5b6y7y11                                 | 2956.51 | 136.440 | 1942  | 3 | 986.18  | 4.71   |
| Q8ZMB5 PTRA_SALTY Protease 3                       | 3  |                      | NAVNAELTMAR                     | 163 | 11 | 3  | 24.02 | b7y3y8                                    | 1189.59 | 46.324  | 28757 | 2 | 595.30  | -6.98  |
| Q8ZMB5 PTRA_SALTY Protease 3                       | 4  |                      | QGLVEGISADSDPIVNGNSGVFAISATLTDK | 329 | 31 | 5  | 35.25 | b14b15b16y14*y14                          | 3075.58 | 136.623 | 23685 | 2 | 1538.29 | 8.89   |
| Q8ZMB5 PTRA_SALTY Protease 3                       | 5  |                      | YFDELAHVLDLDFR                  | 387 | 14 | 3  | 26.82 | b8b9b11                                   | 1752.82 | 79.681  | 15644 | 3 | 584.95  | -19.71 |
| Q8ZMB5 PTRA_SALTY Protease 3                       | 6  |                      | DVVVEK                          | 735 | 6  | 2  | 26.63 | b5y3                                      | 688.39  | 40.187  | 9475  | 1 | 688.39  | 7.18   |
| Q8ZMB5 PTRA_SALTY Protease 3                       | 7  |                      | IDNNSAQFR                       | 295 | 9  | 5  | 30.18 | b6°b6°b6y3y4                              | 1064.53 | 88.793  | 2497  | 1 | 1064.53 | 17.20  |
| Q8ZMB5 PTRA_SALTY Protease 3                       | 8  |                      | LAMMTPQNAR                      | 445 | 10 | 3  | 26.62 | b4y5y7                                    | 1132.55 | 27.764  | 2331  | 2 | 566.78  | -5.82  |

|                                                   |    |                       |                                          |     |    |   |       |                                |         |         |       |   |         |        |
|---------------------------------------------------|----|-----------------------|------------------------------------------|-----|----|---|-------|--------------------------------|---------|---------|-------|---|---------|--------|
| Q8ZMB5 PTRA_SALTY Protease 3                      | 9  |                       | AEYVHPTGWK                               | 932 | 10 | 4 | 47.51 | b3b5b8y9                       | 1187.58 | 136.439 | 2099  | 1 | 1187.58 | -6.06  |
| Q8ZMB5 PTRA_SALTY Protease 3                      | 10 |                       | AYEQAIMPVQMISQVPYFSR                     | 652 | 20 | 5 | 14.19 | b10°b10y3y12°y12               | 2358.14 | 110.436 | 1820  | 3 | 786.72  | -8.39  |
| Q8ZMB5 PTRA_SALTY Protease 3                      | 11 |                       | TEEQLGYAVFAFPM SVGR                      | 792 | 18 | 4 | 26.26 | b9y5y11y12                     | 2002.00 | 113.330 | 1595  | 2 | 1001.50 | 10.55  |
| Q8ZMB5 PTRA_SALTY Protease 3                      | 12 |                       | DFDR                                     | 878 | 4  | 1 | 12.69 | y3                             | 552.24  | 23.690  | 1549  | 1 | 552.24  | -3.76  |
| Q8ZMB5 PTRA_SALTY Protease 3                      | 13 |                       | AYEQAIMPVQMISQVPYFSRDER                  | 652 | 23 | 6 | 33.21 | b10°b10b11y4y9y11              | 2758.31 | 66.790  | 14955 | 4 | 690.33  | -7.79  |
| Q8ZMB5 PTRA_SALTY Protease 3                      | 14 |                       | HGGSHNASTAPYRTAFYLEVEND<br>ALPGA VDR     | 113 | 31 | 4 | 11.18 | b3b14°b14y9                    | 3315.60 | 103.423 | 9789  | 4 | 829.65  | 5.23   |
| Q8ZMB5 PTRA_SALTY Protease 3                      | 15 |                       | TAFYLEVENDALPGA VDR LADAI<br>AAPLLNK     | 126 | 30 | 5 | 17.2  | b8°b8b11b13°b13                | 3170.65 | 91.959  | 8793  | 4 | 793.42  | -8.55  |
| Q8ZMB5 PTRA_SALTY Protease 3                      | 16 |                       | QAPQTLGEEASRLSK                          | 863 | 15 | 3 | 25.98 | b3b4b9                         | 1614.85 | 38.702  | 8533  | 3 | 538.95  | 1.51   |
| Q8ZMB5 PTRA_SALTY Protease 3                      | 17 |                       | ADVSVL RNPQAMDSAR                        | 547 | 17 | 3 | 16.1  | b5y3y10                        | 1828.91 | 73.053  | 5175  | 2 | 914.96  | -11.48 |
| Q8ZMB5 PTRA_SALTY Protease 3                      | 18 |                       | RYFDELAHVLDLDFR                          | 386 | 15 | 4 | 25.44 | b4b11y3y13                     | 1908.93 | 61.498  | 4440  | 2 | 954.97  | -13.49 |
| Q8ZMB5 PTRA_SALTY Protease 3                      | 19 |                       | NWQQKAQGIALSLPELNPYPDDF<br>TLVK          | 487 | 28 | 3 | 22.62 | b5b6b12                        | 3198.67 | 106.228 | 3412  | 3 | 1066.90 | -3.13  |
| Q8ZMB5 PTRA_SALTY Protease 3                      | 20 |                       | ISEQTFKNWQKQ                             | 480 | 12 | 3 | 22.01 | b8b10y5                        | 1536.78 | 70.752  | 2643  | 3 | 512.93  | -3.50  |
| Q8ZMB5 PTRA_SALTY Protease 3                      | 21 | Phosphoryl STY(11)    | VWDNV SALQQTLP LMSEK                     | 942 | 18 | 4 | 15.37 | b11_H3PO4 b11y6y11°y11         | 2139.02 | 71.679  | 1501  | 3 | 713.68  | 2.63   |
| Q8ZMB5 PTRA_SALTY Protease 3                      | 22 | Oxidation+M(15)       | VWDNV SALQQTLP LMSEK                     | 942 | 18 | 3 | 15.37 | b10b16y6                       | 2075.03 | 91.073  | 16661 | 3 | 692.35  | -7.29  |
| Q8ZMB5 PTRA_SALTY Protease 3                      | 23 | Oxidation+M(18)       | GLANRDEVVA AIFS YL NMLREK                | 360 | 22 | 4 | 23.95 | b3b4b6y8                       | 2525.31 | 71.990  | 7427  | 2 | 1263.16 | -4.16  |
| Q8ZMB5 PTRA_SALTY Protease 3                      | 24 | Oxidation+M(15)       | LADFFHQAVVEPQGMAILSQIAGS<br>QNGK         | 904 | 28 | 3 | 17.62 | y5y7y9                         | 2972.45 | 98.141  | 5891  | 3 | 991.49  | -13.96 |
| Q8ZMB5 PTRA_SALTY Protease 3                      | 25 | Oxidation+M()         | AYEQAIMPVQMISQVPYFSRDER                  | 652 | 23 | 6 | 29.09 | b6y7y9°y9y10y12                | 2774.34 | 99.289  | 5652  | 4 | 694.34  | 6.07   |
| Q8ZMB5 PTRA_SALTY Protease 3                      | 26 |                       | LADFFHQAVVEPQGMAILSQ                     | 904 | 20 | 6 | 35.63 | y8y9*y9y10°y10*y10             | 2201.11 | 136.380 | 1884  | 3 | 734.38  | 3.99   |
| P66692 RPIA_SALTY Ribose-5-phohate<br>isomerase A | 1  |                       | AVGWAA LQYVQPGTIVGVGTGST<br>AAHFIDALGTMK | 8   | 35 | 8 | 22.55 | b2b4b11y7y10y14y19y35          | 3487.80 | 107.712 | 51988 | 3 | 1163.27 | -1.33  |
| P66692 RPIA_SALTY Ribose-5-phohate<br>isomerase A | 2  | Carbamidomethyl+C(3)  | FICIADASK                                | 112 | 9  | 7 | 61.16 | b2b5y3y5y6y7y9                 | 1024.51 | 51.026  | 29444 | 2 | 512.76  | -6.08  |
| P66692 RPIA_SALTY Ribose-5-phohate<br>isomerase A | 3  |                       | GADVALIGTPDGVK                           | 201 | 14 | 8 | 39.35 | b4b6b11y1y2y5y7y14             | 1312.71 | 57.221  | 23588 | 2 | 656.86  | -3.53  |
| P66692 RPIA_SALTY Ribose-5-phohate<br>isomerase A | 4  |                       | GQIEGAVSSSDASTEK                         | 43  | 16 | 4 | 27.33 | b4y3y5y9                       | 1565.74 | 33.224  | 3264  | 2 | 783.37  | 7.02   |
| P66692 RPIA_SALTY Ribose-5-phohate<br>isomerase A | 5  |                       | LGGRPEYR                                 | 149 | 8  | 4 | 48.89 | b7y3y4y6                       | 947.51  | 56.135  | 1657  | 1 | 947.51  | 2.06   |
| P66692 RPIA_SALTY Ribose-5-phohate<br>isomerase A | 6  |                       | GQIEGAVSSSDASTEKLK                       | 43  | 18 | 7 | 34.22 | b3*b3b4*b4b8b13y10             | 1806.91 | 38.922  | 2339  | 2 | 903.96  | 1.55   |
| P21267 GSA_SALTY Glutamate-1-<br>semialdehyde 2   | 1  |                       | IIGGGMPVGA FGGRR                         | 265 | 15 | 4 | 31.46 | b12b13y7y10                    | 1444.79 | 103.279 | 15010 | 2 | 722.90  | 7.01   |
| P21267 GSA_SALTY Glutamate-1-<br>semialdehyde 2   | 2  |                       | GLSFGAPTEMEVK                            | 81  | 13 | 9 | 42.61 | b5°b5b7y2y6°y6y8y12y13         | 1365.68 | 66.093  | 11291 | 2 | 683.34  | 2.50   |
| P21267 GSA_SALTY Glutamate-1-<br>semialdehyde 2   | 3  | Carbamidomethyl+C(18) | VALAGA QDY YGVV PDLTCLGK                 | 244 | 21 | 9 | 52.02 | b2b10b11b12b13°b13b15y<br>2y12 | 2210.14 | 103.383 | 5679  | 2 | 1105.57 | 9.61   |
| P21267 GSA_SALTY Glutamate-1-<br>semialdehyde 2   | 4  |                       | AFTGVGGTPLFIEK                           | 24  | 14 | 3 | 19.04 | b7b11y3                        | 1436.77 | 71.445  | 2635  | 2 | 718.89  | -5.86  |
| P21267 GSA_SALTY Glutamate-1-<br>semialdehyde 2   | 5  |                       | GLSFGAPTEMEVKMAELVTNLVP<br>TMDMVR        | 81  | 29 | 4 | 16.7  | b7b13b16y11                    | 3166.61 | 88.507  | 3672  | 3 | 1056.21 | 13.42  |

|                                                                 |   |                                       |                                    |     |    |   |       |                                  |         |         |       |   |         |        |
|-----------------------------------------------------------------|---|---------------------------------------|------------------------------------|-----|----|---|-------|----------------------------------|---------|---------|-------|---|---------|--------|
| P21267 GSA_SALTY Glutamate-1-semialdehyde 2                     | 6 | Phosphoryl STY(11)                    | MAELVTNLVPTMDMVR                   | 94  | 16 | 3 | 23.46 | b8b9y4                           | 1899.88 | 58.929  | 15387 | 2 | 950.44  | 4.37   |
| P21267 GSA_SALTY Glutamate-1-semialdehyde 2                     | 7 | Carbamidomethyl+C(3); Oxidation+M(16) | ALCDEFGALLIIDEVMTGFR               | 224 | 20 | 6 | 30.23 | b3b4b13y4°y4y9                   | 2286.15 | 118.290 | 2998  | 2 | 1143.58 | 13.67  |
| P37168 MVIM_SALTY Virulence factor mviM                         | 1 |                                       | ESVQAVTDGGLYDVTDMR                 | 221 | 18 | 5 | 36.23 | b7b8y3y4y18                      | 1955.91 | 71.928  | 9100  | 2 | 978.46  | 2.43   |
| P37168 MVIM_SALTY Virulence factor mviM                         | 2 |                                       | AGSQRESVQAVTDGGLYDVTDMR            | 216 | 23 | 5 | 35.29 | b6y14y15*y15y16                  | 2455.17 | 98.016  | 3219  | 2 | 1228.09 | 8.45   |
| P37168 MVIM_SALTY Virulence factor mviM                         | 3 |                                       | FTLLDDYLHVVDTALWLAGGEAR            | 158 | 23 | 3 | 12.89 | b7y8y14                          | 2575.31 | 99.710  | 5930  | 3 | 859.11  | -1.90  |
| P37168 MVIM_SALTY Virulence factor mviM                         | 4 |                                       | AWLPVLTNTAGWTLQGAWSPSR             | 17  | 22 | 4 | 20.59 | b4b11b13y21                      | 2412.24 | 94.777  | 3322  | 4 | 603.81  | -4.05  |
| P16657 FABI_SALTY Enoyl-[acyl-carrier-protein] reductase [NADH] | 1 |                                       | TMLNPGSALLTLSYLGAER                | 132 | 19 | 4 | 23.34 | b11y4y7y14                       | 2007.07 | 101.425 | 24703 | 2 | 1004.04 | 3.77   |
| P16657 FABI_SALTY Enoyl-[acyl-carrier-protein] reductase [NADH] | 2 |                                       | YMANAMGPEGVR                       | 171 | 12 | 6 | 33.86 | b2b5y6°y6y10y11                  | 1295.59 | 44.979  | 18104 | 2 | 648.30  | -1.22  |
| P16657 FABI_SALTY Enoyl-[acyl-carrier-protein] reductase [NADH] | 3 |                                       | VAHDISSYSFVAMAK                    | 114 | 15 | 3 | 17.9  | b7y8y11                          | 1625.83 | 70.540  | 2493  | 2 | 813.42  | 19.82  |
| P16657 FABI_SALTY Enoyl-[acyl-carrier-protein] reductase [NADH] | 4 | Oxidation+M(13)                       | VAHDISSYSFVAMAK                    | 114 | 15 | 3 | 17.9  | b6y12y14                         | 1641.79 | 113.470 | 1762  | 2 | 821.40  | -1.86  |
| Q8ZKW8 ATPG_SALTY ATP synthase gamma chain                      | 1 |                                       | AWDYLYEPDPK                        | 202 | 11 | 4 | 27.03 | b1b5y7y8                         | 1396.63 | 48.106  | 4661  | 2 | 698.82  | -5.16  |
| Q8ZKW8 ATPG_SALTY ATP synthase gamma chain                      | 2 |                                       | YVESQVYQGIVENLASEQAAR              | 222 | 21 | 4 | 24.42 | b4b5b9y3                         | 2340.15 | 73.085  | 4579  | 2 | 1170.58 | 2.19   |
| Q8ZKW8 ATPG_SALTY ATP synthase gamma chain                      | 3 |                                       | GVSFFNSVGGNVVAQVTGMGDNPSLSELIGPVK  | 121 | 33 | 4 | 16.78 | b5°b5b13b23                      | 3276.68 | 129.219 | 67496 | 3 | 1092.90 | 8.20   |
| Q8ZKW8 ATPG_SALTY ATP synthase gamma chain                      | 4 |                                       | FINTMSQVPTITQLLPLASEDDDLK          | 174 | 26 | 7 | 21.59 | b3*b3b9°b9y3y9y16                | 2886.42 | 94.771  | 36415 | 3 | 962.81  | -20.64 |
| Q8ZKW8 ATPG_SALTY ATP synthase gamma chain                      | 5 |                                       | IASVQNTQK                          | 10  | 9  | 5 | 52.83 | b4y3y5y7°y7                      | 988.53  | 18.202  | 2426  | 2 | 494.77  | -15.68 |
| Q8ZKW8 ATPG_SALTY ATP synthase gamma chain                      | 6 |                                       | MAASRPYAETMR                       | 38  | 12 | 4 | 36.87 | b4y3y6y10                        | 1383.68 | 113.271 | 1968  | 2 | 692.34  | 20.20  |
| Q8ZKW8 ATPG_SALTY ATP synthase gamma chain                      | 7 |                                       | QASITQELTEIVSGAAAV                 | 269 | 18 | 3 | 15.37 | b4b6y5                           | 1787.93 | 112.936 | 1769  | 2 | 894.47  | -4.78  |
| Q8ZKW8 ATPG_SALTY ATP synthase gamma chain                      | 8 | Phosphoryl STY(9)                     | QASITQELTEIVSGAAAV                 | 269 | 18 | 7 | 39.71 | b12b13°b13y9y10°y10y12_H3PO4 y12 | 1867.91 | 108.354 | 1647  | 2 | 934.46  | 8.50   |
| Q8ZKW8 ATPG_SALTY ATP synthase gamma chain                      | 9 | Oxidation+M(5)                        | FINTMSQVPTITQLLPLASEDDDLKR         | 174 | 27 | 6 | 35.63 | b7b8b10*b10y7y8                  | 3058.56 | 136.236 | 15874 | 4 | 765.40  | -4.79  |
| P62405 RL5_SALTY 50S ribosomal protein L5                       | 1 |                                       | LLDNAAADLTAISGQKPLITK              | 48  | 21 | 9 | 48.2  | b3b4b5*b5y2y5y9y14y21            | 2153.21 | 75.458  | 92254 | 3 | 718.41  | -4.42  |
| P62405 RL5_SALTY 50S ribosomal protein L5                       | 2 |                                       | LMTEFNYSVMQVPR                     | 15  | 15 | 6 | 17.9  | b13y2y10°y10y13*y13              | 1828.86 | 76.222  | 6891  | 3 | 610.29  | -6.67  |
| P62405 RL5_SALTY 50S ribosomal protein L5                       | 3 |                                       | EQIIFPEIDYDK                       | 133 | 12 | 4 | 22.01 | b9°b9b11y3                       | 1509.73 | 67.743  | 5985  | 3 | 503.92  | -9.06  |
| P62405 RL5_SALTY 50S ribosomal protein L5                       | 4 |                                       | LHDYYK                             | 3   | 6  | 3 | 39.73 | b4y3y4                           | 838.41  | 73.154  | 10692 | 1 | 838.41  | 4.73   |
| P62405 RL5_SALTY 50S ribosomal protein L5                       | 5 |                                       | DEVVNK                             | 9   | 6  | 1 | 13.52 | b3                               | 703.35  | 43.321  | 9645  | 1 | 703.35  | -12.15 |
| P62405 RL5_SALTY 50S ribosomal protein L5                       | 6 |                                       | EQIIFPEIDYDKVDR                    | 133 | 15 | 6 | 55    | b12y3y6y7y10y11                  | 1879.93 | 73.214  | 54716 | 3 | 627.31  | -7.27  |
| P62405 RL5_SALTY 50S ribosomal protein L5                       | 7 |                                       | SFDGRGNYSMGVR                      | 120 | 13 | 5 | 29.3  | b6b12y7y11°y11                   | 1445.66 | 55.097  | 10146 | 3 | 482.56  | -2.20  |
| Q7CPH8 SECB_SALTY Protein-export protein secB                   | 1 |                                       | GTFPQLNLAPVNFDAFMNYLQQQAGEGTEEHQDA | 120 | 35 | 4 | 12.7  | b6b9y3y26                        | 3893.81 | 116.102 | 10263 | 3 | 1298.61 | 1.63   |
| Q7CPH8 SECB_SALTY Protein-export protein secB                   | 2 |                                       | IYTKDVSFEAPNAPHVFQK                | 15  | 19 | 3 | 21.7  | b3b7b17                          | 2191.12 | 75.479  | 8610  | 4 | 548.54  | 2.34   |
| Q7CPH8 SECB_SALTY Protein-export protein secB                   | 3 |                                       | LDLDTASSQLADDVYEVVLR               | 41  | 20 | 5 | 22.32 | b8b10*b10b13y11                  | 2222.11 | 109.712 | 5568  | 3 | 741.37  | -5.16  |

|                                                   |   |                      |                        |     |    |    |       |                           |         |        |        |   |        |        |
|---------------------------------------------------|---|----------------------|------------------------|-----|----|----|-------|---------------------------|---------|--------|--------|---|--------|--------|
| Q7CPH8 SECB_SALTY Protein-export protein secB     | 4 |                      | DVSFEAPNAPHVFQKDWQPEVK | 19  | 22 | 4  | 19.79 | b3°b3b8b10                | 2568.22 | 86.572 | 330677 | 3 | 856.74 | -12.36 |
| Q7CPH8 SECB_SALTY Protein-export protein secB     | 5 |                      | IYTKDVSFEAPNAPHVFQK    | 15  | 19 | 3  | 23.92 | y12y13y15                 | 2191.15 | 88.639 | 20917  | 3 | 731.05 | 13.71  |
| P53636 SODC1_SALTY Superoxide dismutase [Cu-Zn] 1 | 1 |                      | GGDNYSDKPAPLGGGGAR     | 151 | 18 | 10 | 82.86 | b2b12y6y7y8y9y10y11y13y18 | 1688.78 | 33.167 | 80168  | 3 | 563.60 | -13.95 |
| P53636 SODC1_SALTY Superoxide dismutase [Cu-Zn] 1 | 2 | Carbamidomethyl+C(3) | FACGVIEK               | 169 | 8  | 8  | 66.77 | y2°y2y3y4y5y6y7y8         | 923.46  | 41.171 | 16765  | 1 | 923.46 | -4.10  |
| P53636 SODC1_SALTY Superoxide dismutase [Cu-Zn] 1 | 3 |                      | EVPALMAGGHLDPEK        | 84  | 15 | 6  | 36.63 | b7°b7b10b14y5y13          | 1563.80 | 84.049 | 7490   | 2 | 782.40 | 11.79  |
